# Supplementary material for: [Retracted] Disorder Genes Regulate the Progression of Ischemic Stroke through the NF‐κB Signaling Pathway
Source: Hindawi journal article supplement (doi:10.1155/2021/2464269), 2021-01-01
Supplement: f1 [file 2464269.f1.pdf]

**Table S1.DEG of genes(pvalue<0.05)**

| DEG        | logFC    | AveExpr  | t        | P.Value  | adj.P.Val | B        |
|------------|----------|----------|----------|----------|-----------|----------|
| Scd4       | 1.427273 | 7.257582 | 4.626628 | 0.000435 | 0.027635  | 0.21156  |
| Fah        | 1.266371 | 7.185594 | 3.841549 | 0.001925 | 0.051921  | -1.20243 |
| Slc40a1    | 1.251248 | 6.333632 | 6.738685 | 1.17E-05 | 0.008528  | 3.596386 |
| 4930577N1  | 1.228258 | 4.723585 | 8.475725 | 9.28E-07 | 0.003241  | 5.859155 |
| Mir27a     | 1.178806 | 5.124071 | 7.887094 | 2.10E-06 | 0.004014  | 5.142487 |
| Nr4a1      | 1.149699 | 8.442525 | 5.10863  | 0.00018  | 0.019303  | 1.043992 |
| Hsph1      | 1.079    | 6.079539 | 3.561368 | 0.003314 | 0.0664    | -1.71799 |
| Atcayos    | 1.066067 | 6.946771 | 2.81086  | 0.014327 | 0.133392  | -3.09397 |
| Gm12381    | 1.040561 | 5.250261 | 7.132763 | 6.35E-06 | 0.006956  | 4.149821 |
| Higd1a     | 1.038411 | 5.030436 | 9.624652 | 2.11E-07 | 0.003241  | 7.123807 |
| 4930594C1  | 1.037052 | 4.279187 | 4.814842 | 0.000307 | 0.024884  | 0.540386 |
| Paqr6      | 1.030691 | 4.846888 | 7.257269 | 5.27E-06 | 0.006504  | 4.319627 |
| Syt12      | 1.028697 | 5.17662  | 4.2503   | 0.00088  | 0.037172  | -0.4588  |
| Acot1      | 1.009257 | 8.363027 | 2.607623 | 0.021212 | 0.161804  | -3.45702 |
| C7         | 1.007575 | 7.922245 | 2.773793 | 0.015394 | 0.138105  | -3.16069 |
| Nr4a3      | 0.990872 | 4.824863 | 4.230286 | 0.000914 | 0.037572  | -0.49488 |
| Mir23a     | 0.981859 | 4.480269 | 5.441819 | 0.0001   | 0.015433  | 1.599816 |
| Gm3248     | 0.948201 | 4.791158 | 3.764197 | 0.002235 | 0.05562   | -1.34445 |
| Try4       | 0.9387   | 4.990509 | 3.635598 | 0.002868 | 0.062351  | -1.58113 |
| Gm11821    | 0.934333 | 4.262414 | 3.074479 | 0.008575 | 0.104714  | -2.61461 |
| Mirlet7c-1 | 0.917772 | 3.935123 | 5.628567 | 7.24E-05 | 0.014445  | 1.903882 |
| Gm19522    | 0.903219 | 5.978302 | 5.471092 | 9.51E-05 | 0.015433  | 1.647838 |
| Atf3       | 0.896281 | 6.007874 | 9.208776 | 3.55E-07 | 0.003241  | 6.68552  |
| LOC10263   | 0.886258 | 4.954685 | 7.492005 | 3.72E-06 | 0.005475  | 4.633288 |
| H2-T22     | 0.878065 | 4.543281 | 5.259349 | 0.000138 | 0.017535  | 1.297498 |
| Eil2       | 0.877231 | 6.92592  | 6.791451 | 1.07E-05 | 0.008528  | 3.671911 |
| Pomgnt2    | 0.876933 | 4.838206 | 7.385728 | 4.35E-06 | 0.005688  | 4.492319 |
| Mir30e     | 0.868327 | 3.829915 | 5.104278 | 0.000182 | 0.019303  | 1.036621 |
| Gm13552    | 0.858175 | 7.582733 | 5.791724 | 5.48E-05 | 0.012606  | 2.165033 |
| 0610040B1  | 0.856744 | 5.013984 | 7.486846 | 3.74E-06 | 0.005475  | 4.626484 |
| AI987944   | 0.846887 | 4.763613 | 5.709974 | 6.30E-05 | 0.013916  | 2.034712 |
| Csrnp1     | 0.838515 | 5.408678 | 3.708411 | 0.00249  | 0.058217  | -1.44705 |
| Snord14a   | 0.83571  | 4.352588 | 4.329903 | 0.000757 | 0.034093  | -0.31569 |
| Hspa1a     | 0.831489 | 5.970432 | 4.335218 | 0.00075  | 0.034067  | -0.30616 |
| Bdh1       | 0.827881 | 7.08077  | 3.162907 | 0.007214 | 0.09563   | -2.45241 |
| Gpt        | 0.825473 | 5.044084 | 5.68853  | 6.53E-05 | 0.014117  | 2.00035  |
| Irs2       | 0.822964 | 6.245955 | 5.36099  | 0.000115 | 0.016075  | 1.466527 |
| Adamts9    | 0.81939  | 7.050808 | 8.899665 | 5.28E-07 | 0.003241  | 6.345673 |
| Gm33396    | 0.815626 | 6.179135 | 4.06001  | 0.001265 | 0.042312  | -0.80333 |
| Lysmd1     | 0.807081 | 4.599911 | 2.220595 | 0.044126 | 0.228938  | -4.12325 |
| Gm17224    | 0.803379 | 5.076006 | 3.374395 | 0.004772 | 0.078726  | -2.06294 |
| Ccl2       | 0.79341  | 7.315162 | 6.873431 | 9.45E-06 | 0.008104  | 3.788375 |
| Ehhadh     | 0.792759 | 5.70009  | 3.68666  | 0.002598 | 0.059838  | -1.48708 |
| Erbp3      | 0.787265 | 5.139075 | 6.131227 | 3.10E-05 | 0.011485  | 2.694798 |
| Mir99a     | 0.78105  | 4.302227 | 4.153562 | 0.001058 | 0.039677  | -0.63354 |
| Adamts1    | 0.780056 | 7.469293 | 5.358134 | 0.000116 | 0.016075  | 1.461799 |

|           |          |          |          |          |          |          |
|-----------|----------|----------|----------|----------|----------|----------|
| Pcdha7    | 0.777907 | 4.124061 | 3.870666 | 0.001819 | 0.050594 | -1.14906 |
| Mir490    | 0.77594  | 4.512075 | 5.626625 | 7.26E-05 | 0.014445 | 1.900747 |
| Irak2     | 0.771003 | 5.838301 | 6.651344 | 1.34E-05 | 0.008594 | 3.470398 |
| Adgrd1    | 0.770291 | 5.099338 | 3.222645 | 0.006419 | 0.090568 | -2.34258 |
| Ttc7      | 0.769904 | 5.20852  | 6.259146 | 2.51E-05 | 0.010773 | 2.889589 |
| Btg2      | 0.764533 | 6.595483 | 4.765457 | 0.000336 | 0.025389 | 0.454556 |
| Arntl     | 0.755168 | 5.804016 | 3.545734 | 0.003416 | 0.067035 | -1.74682 |
| Vmn2r62   | 0.751    | 4.000175 | 3.568461 | 0.003269 | 0.066221 | -1.7049  |
| Has2      | 0.738471 | 4.650974 | 4.647338 | 0.000418 | 0.027213 | 0.247966 |
| Ifi2712a  | 0.737532 | 3.91206  | 3.538617 | 0.003464 | 0.067579 | -1.75995 |
| Tacc2     | 0.726468 | 10.88862 | 3.213319 | 0.006538 | 0.091305 | -2.35973 |
| Nt5dc2    | 0.717665 | 7.172797 | 4.767625 | 0.000335 | 0.025389 | 0.458331 |
| Clpx      | 0.701402 | 8.867628 | 4.823698 | 0.000302 | 0.024726 | 0.555742 |
| Acy3      | 0.694573 | 8.203895 | 5.131864 | 0.000173 | 0.019044 | 1.083291 |
| Bcl6b     | 0.691867 | 5.716214 | 6.45884  | 1.82E-05 | 0.009829 | 3.188407 |
| Rps27     | 0.690545 | 5.03912  | 8.158319 | 1.43E-06 | 0.003241 | 5.47881  |
| Snora81   | 0.686795 | 6.113417 | 5.983554 | 3.96E-05 | 0.01211  | 2.466644 |
| Gfpt2     | 0.684367 | 7.986064 | 2.997296 | 0.009968 | 0.112245 | -2.7557  |
| H2afz     | 0.683211 | 4.649629 | 3.310485 | 0.005407 | 0.08365  | -2.18079 |
| Itgam     | 0.682794 | 5.467699 | 2.23999  | 0.042562 | 0.225606 | -4.09087 |
| Dusp5     | 0.679647 | 5.244283 | 4.672256 | 0.000399 | 0.027132 | 0.291698 |
| Tnfaip6   | 0.676253 | 4.058748 | 2.651427 | 0.019498 | 0.155006 | -3.37939 |
| 2500004CC | 0.675917 | 4.645738 | 3.83528  | 0.001948 | 0.052018 | -1.21393 |
| Abracl    | 0.674367 | 4.178004 | 4.385577 | 0.000682 | 0.033    | -0.216   |
| AF357425  | 0.672126 | 5.173954 | 2.957963 | 0.010763 | 0.115727 | -2.8274  |
| 1810014BC | 0.670983 | 4.568158 | 5.359436 | 0.000116 | 0.016075 | 1.463954 |
| Tnip2     | 0.670688 | 5.222714 | 4.219122 | 0.000934 | 0.037622 | -0.51502 |
| Pgam1     | 0.668104 | 4.839098 | 2.256436 | 0.041277 | 0.221534 | -4.06332 |
| Adam4     | 0.667823 | 3.68816  | 5.137945 | 0.000171 | 0.019006 | 1.093562 |
| H2afx     | 0.667263 | 5.683241 | 4.790142 | 0.000322 | 0.025295 | 0.497499 |
| Rnls      | 0.66609  | 4.817908 | 4.975771 | 0.000229 | 0.021582 | 0.817761 |
| Fscn1     | 0.665046 | 5.289391 | 5.270958 | 0.000135 | 0.0175   | 1.316884 |
| Acta1     | 0.663398 | 9.675123 | 2.73454  | 0.016609 | 0.14331  | -3.23112 |
| F830016B0 | 0.663303 | 5.332791 | 2.381623 | 0.032631 | 0.198536 | -3.8509  |
| Gm5617    | 0.661051 | 7.131958 | 5.550581 | 8.28E-05 | 0.014851 | 1.777567 |
| Snord1b   | 0.660272 | 7.258196 | 3.053544 | 0.008932 | 0.10681  | -2.65293 |
| Urah      | 0.658447 | 3.93868  | 6.481399 | 1.75E-05 | 0.00969  | 3.22176  |
| Thrsp     | 0.657918 | 7.782247 | 8.176177 | 1.40E-06 | 0.003241 | 5.500584 |
| AW011738  | 0.657498 | 5.638156 | 4.223376 | 0.000926 | 0.037622 | -0.50734 |
| Evi2b     | 0.65547  | 4.286964 | 3.643801 | 0.002823 | 0.062162 | -1.56602 |
| Pla1a     | 0.654677 | 5.627143 | 3.602597 | 0.003059 | 0.063948 | -1.64196 |
| Abhd1     | 0.654439 | 5.680084 | 2.305952 | 0.037626 | 0.21191  | -3.97985 |
| Cdnf      | 0.653164 | 6.876224 | 5.505356 | 8.96E-05 | 0.01515  | 1.70388  |
| Acsn5     | 0.652642 | 4.574856 | 5.646998 | 7.01E-05 | 0.014445 | 1.933594 |
| Gm7334    | 0.652161 | 4.888906 | 6.174038 | 2.89E-05 | 0.01118  | 2.760283 |
| Gm10362   | 0.647081 | 5.417942 | 4.081403 | 0.001214 | 0.041512 | -0.76444 |
| Gm13889   | 0.645779 | 4.902154 | 4.198792 | 0.000971 | 0.038393 | -0.55173 |
| Mfap1a    | 0.644972 | 6.196184 | 3.867856 | 0.001829 | 0.050728 | -1.15421 |

|           |          |          |          |          |          |          |
|-----------|----------|----------|----------|----------|----------|----------|
| Olf527    | 0.642161 | 3.737259 | 4.795071 | 0.000319 | 0.025191 | 0.506065 |
| Gnb3      | 0.641866 | 4.873505 | 4.248178 | 0.000884 | 0.037172 | -0.46262 |
| Ms4a6c    | 0.639682 | 4.779477 | 2.986003 | 0.01019  | 0.112865 | -2.7763  |
| Dcaf4     | 0.637105 | 5.873728 | 3.960822 | 0.00153  | 0.04651  | -0.98413 |
| Abat      | 0.635898 | 6.47664  | 5.524105 | 8.67E-05 | 0.014927 | 1.734467 |
| Ighv5-6   | 0.632914 | 4.479706 | 3.097618 | 0.008196 | 0.102564 | -2.57222 |
| Nckip5d   | 0.632623 | 5.01846  | 6.701201 | 1.24E-05 | 0.008594 | 3.542464 |
| Smco1     | 0.63246  | 6.899726 | 2.923171 | 0.011517 | 0.119648 | -2.89068 |
| Tmem173   | 0.629083 | 4.711188 | 5.807701 | 5.33E-05 | 0.012606 | 2.190379 |
| Meox2     | 0.62656  | 6.211392 | 5.546434 | 8.34E-05 | 0.014851 | 1.770824 |
| Rps3a1    | 0.623742 | 4.255719 | 6.272957 | 2.46E-05 | 0.010717 | 2.910463 |
| Sh3rf2    | 0.622945 | 8.480092 | 5.442913 | 9.99E-05 | 0.015433 | 1.601613 |
| Asah2     | 0.622938 | 6.810818 | 5.494844 | 9.12E-05 | 0.015238 | 1.686706 |
| Gm12426   | 0.621562 | 6.350332 | 2.483777 | 0.026882 | 0.181357 | -3.67436 |
| Neb       | 0.621446 | 5.134128 | 4.41239  | 0.000648 | 0.032755 | -0.16811 |
| Mir32     | 0.618937 | 4.243306 | 6.394062 | 2.02E-05 | 0.010037 | 3.092178 |
| Pnmt      | 0.618679 | 4.217624 | 3.36498  | 0.004861 | 0.079559 | -2.08031 |
| Vat1l     | 0.617384 | 3.756527 | 5.593434 | 7.69E-05 | 0.014851 | 1.847096 |
| Aldh4a1   | 0.617255 | 7.054233 | 5.267442 | 0.000136 | 0.017518 | 1.311013 |
| Tfb2m     | 0.617045 | 4.200612 | 2.969167 | 0.01053  | 0.114616 | -2.80699 |
| Armcx5    | 0.61693  | 4.719109 | 4.091952 | 0.00119  | 0.041181 | -0.74528 |
| Ap3s1     | 0.615838 | 3.709612 | 4.764763 | 0.000337 | 0.025389 | 0.453348 |
| LOC102634 | 0.615774 | 3.852076 | 7.416683 | 4.15E-06 | 0.005688 | 4.533556 |
| Helz2     | 0.614705 | 5.209696 | 4.489235 | 0.000561 | 0.030941 | -0.0313  |
| Olf525    | 0.614688 | 4.264782 | 3.350555 | 0.005    | 0.080606 | -2.10691 |
| Gm11592   | 0.613722 | 4.287493 | 6.67956  | 1.28E-05 | 0.008594 | 3.511232 |
| Snord37   | 0.613708 | 3.933482 | 5.53829  | 8.46E-05 | 0.014917 | 1.757574 |
| Acad11    | 0.613322 | 9.363302 | 6.322063 | 2.27E-05 | 0.010443 | 2.984431 |
| Fetub     | 0.611932 | 4.517961 | 3.145696 | 0.007461 | 0.097572 | -2.48402 |
| Atp6v0c   | 0.611572 | 4.697876 | 2.722636 | 0.016995 | 0.144941 | -3.25242 |
| Acy1      | 0.610847 | 5.117598 | 3.510887 | 0.003656 | 0.069102 | -1.81111 |
| Rpl7      | 0.609734 | 4.138038 | 4.235878 | 0.000905 | 0.037479 | -0.48479 |
| Myl12a    | 0.607632 | 6.047306 | 3.261932 | 0.005945 | 0.087504 | -2.27025 |
| Slc16a13  | 0.6065   | 5.122586 | 4.397818 | 0.000666 | 0.032994 | -0.19413 |
| Gm26808   | 0.60257  | 4.554947 | 2.384776 | 0.032437 | 0.198032 | -3.84549 |
| E0300110c | 0.602193 | 8.12678  | 5.035318 | 0.000206 | 0.020312 | 0.919472 |
| Plin5     | 0.599854 | 9.697062 | 3.438273 | 0.004213 | 0.074422 | -1.94509 |
| Ier2      | 0.598657 | 4.481132 | 5.344697 | 0.000119 | 0.01612  | 1.439538 |
| Gda       | 0.598368 | 5.862498 | 3.235974 | 0.006254 | 0.089253 | -2.31804 |
| LOC101055 | 0.597782 | 4.179425 | 3.154094 | 0.00734  | 0.096696 | -2.4686  |
| Nphp1     | 0.597731 | 5.344764 | 5.277744 | 0.000134 | 0.017404 | 1.328205 |
| Gclm      | 0.595737 | 8.440935 | 2.716088 | 0.017212 | 0.145936 | -3.26414 |
| Rogdi     | 0.595235 | 6.342865 | 5.7925   | 5.47E-05 | 0.012606 | 2.166266 |
| Utp14a    | 0.593492 | 5.233432 | 2.704561 | 0.017599 | 0.147342 | -3.28474 |
| Snora75   | 0.589732 | 4.52387  | 2.996529 | 0.009983 | 0.112245 | -2.7571  |
| Casp8     | 0.588928 | 7.02949  | 5.255551 | 0.000139 | 0.017535 | 1.291152 |
| Snord42b  | 0.588637 | 5.784227 | 4.641117 | 0.000423 | 0.027251 | 0.237035 |
| Mir29a    | 0.587972 | 3.52828  | 4.648322 | 0.000418 | 0.027213 | 0.249695 |

|                    |          |          |          |          |          |          |
|--------------------|----------|----------|----------|----------|----------|----------|
| Mmab               | 0.587328 | 6.958052 | 4.647292 | 0.000418 | 0.027213 | 0.247886 |
| Zfp943             | 0.586717 | 6.164778 | 5.874592 | 4.76E-05 | 0.012162 | 2.296049 |
| Mir155             | 0.586626 | 4.183287 | 5.370965 | 0.000113 | 0.016075 | 1.48303  |
| LOC102638          | 0.584405 | 4.38465  | 5.845492 | 5.00E-05 | 0.012328 | 2.250168 |
| Snhg12             | 0.583591 | 4.404588 | 4.088852 | 0.001197 | 0.041308 | -0.75091 |
| B3gnt3             | 0.583028 | 5.83725  | 4.604124 | 0.000453 | 0.028131 | 0.171939 |
| Siae               | 0.582703 | 6.749685 | 6.218545 | 2.69E-05 | 0.010947 | 2.82805  |
| Adck4              | 0.581177 | 5.012431 | 4.642102 | 0.000422 | 0.027251 | 0.238766 |
| Anp32b             | 0.580499 | 3.963915 | 3.140898 | 0.007531 | 0.097851 | -2.49283 |
| Xlr5c              | 0.579166 | 4.047721 | 3.518078 | 0.003606 | 0.068476 | -1.79784 |
| Pgap1              | 0.578674 | 5.227814 | 5.545048 | 8.36E-05 | 0.014851 | 1.768569 |
| Lgals3bp           | 0.578613 | 8.465739 | 3.314377 | 0.005366 | 0.08353  | -2.17362 |
| Marcksl1- $\alpha$ | 0.577332 | 4.16334  | 5.545466 | 8.36E-05 | 0.014851 | 1.76925  |
| Cideb              | 0.576253 | 5.953654 | 2.430017 | 0.029775 | 0.191527 | -3.7676  |
| Pcdha12            | 0.573612 | 3.76345  | 3.004123 | 0.009837 | 0.111523 | -2.74325 |
| Mettl18            | 0.573408 | 4.19035  | 5.20467  | 0.000152 | 0.017841 | 1.205921 |
| Ddt                | 0.572184 | 6.697876 | 2.68489  | 0.01828  | 0.150181 | -3.31984 |
| Sema3f             | 0.571798 | 6.198497 | 3.373137 | 0.004784 | 0.078798 | -2.06526 |
| Il2rg              | 0.571594 | 6.402822 | 4.449777 | 0.000604 | 0.031585 | -0.10147 |
| Bckdhb             | 0.570591 | 8.464006 | 5.2924   | 0.00013  | 0.017404 | 1.352633 |
| Mrln               | 0.569519 | 3.608409 | 5.550546 | 8.28E-05 | 0.014851 | 1.777511 |
| Slc7a7             | 0.568454 | 4.77023  | 2.783258 | 0.015114 | 0.13728  | -3.14367 |
| Mirlet7c-2         | 0.5684   | 3.748393 | 3.523664 | 0.003567 | 0.068153 | -1.78754 |
| BC025920           | 0.567983 | 4.403132 | 3.256631 | 0.006007 | 0.087839 | -2.28001 |
| Scn4a              | 0.567803 | 5.740607 | 3.049288 | 0.009007 | 0.107004 | -2.66072 |
| Gprc5a             | 0.565999 | 4.088338 | 3.807398 | 0.002056 | 0.053574 | -1.2651  |
| Gng11              | 0.565375 | 5.303847 | 5.172208 | 0.000161 | 0.018455 | 1.151341 |
| 90306170C          | 0.565301 | 8.324154 | 5.220279 | 0.000148 | 0.017742 | 1.232109 |
| Mgst1              | 0.56524  | 8.955471 | 3.29353  | 0.005589 | 0.084981 | -2.21204 |
| Sbk2               | 0.563226 | 4.788612 | 4.12816  | 0.00111  | 0.039942 | -0.67957 |
| Fbxo31             | 0.563137 | 8.997389 | 3.140476 | 0.007538 | 0.097851 | -2.4936  |
| Adh1               | 0.561883 | 8.281755 | 6.232201 | 2.63E-05 | 0.010947 | 2.848779 |
| H2-Q5              | 0.561659 | 4.680895 | 4.010482 | 0.00139  | 0.044033 | -0.89352 |
| Zkscan7            | 0.561639 | 5.032284 | 2.866443 | 0.012861 | 0.125887 | -2.99356 |
| Trim12c            | 0.56113  | 4.106574 | 2.437111 | 0.029377 | 0.189988 | -3.75534 |
| A730063M           | 0.560282 | 4.975291 | 4.574714 | 0.000479 | 0.02881  | 0.120063 |
| Tmem71             | 0.559577 | 6.176436 | 3.212955 | 0.006542 | 0.091319 | -2.3604  |
| Bambi-ps1          | 0.559231 | 4.191888 | 5.019177 | 0.000212 | 0.020747 | 0.891952 |
| Snap29             | 0.559068 | 5.729079 | 4.909397 | 0.000259 | 0.02321  | 0.703795 |
| Slc20a1            | 0.558811 | 5.537055 | 6.646716 | 1.35E-05 | 0.008594 | 3.463688 |
| Gpank1             | 0.557963 | 4.213715 | 5.249458 | 0.00014  | 0.017535 | 1.280965 |
| Snord11            | 0.557095 | 6.448632 | 4.14192  | 0.001081 | 0.03972  | -0.65463 |
| Fen1               | 0.555691 | 4.245456 | 3.792107 | 0.002118 | 0.05449  | -1.29317 |
| Msrb1              | 0.555013 | 9.335449 | 3.143424 | 0.007494 | 0.097601 | -2.48819 |
| Pi16               | 0.554843 | 7.793535 | 2.518444 | 0.025163 | 0.175556 | -3.61387 |
| D830026I1          | 0.554315 | 4.068336 | 3.634686 | 0.002874 | 0.062351 | -1.58282 |
| Ltc4s              | 0.552877 | 4.809804 | 4.426912 | 0.000631 | 0.032401 | -0.14221 |
| Mterf2             | 0.549981 | 4.372972 | 4.715169 | 0.000369 | 0.026586 | 0.366825 |

|           |          |          |          |          |          |          |
|-----------|----------|----------|----------|----------|----------|----------|
| Dgat1     | 0.548408 | 5.683872 | 4.911474 | 0.000258 | 0.02321  | 0.707371 |
| Pcx       | 0.547587 | 5.317251 | 3.312139 | 0.005389 | 0.08365  | -2.17774 |
| Lymr2     | 0.546848 | 5.898587 | 2.931574 | 0.01133  | 0.118849 | -2.87541 |
| Siglec1   | 0.544352 | 4.888387 | 2.905628 | 0.011917 | 0.120825 | -2.92253 |
| Akr1b10   | 0.543932 | 8.12597  | 4.272048 | 0.000845 | 0.036197 | -0.41964 |
| LOC10263f | 0.543033 | 4.334017 | 4.461297 | 0.000591 | 0.031294 | -0.08096 |
| Adss      | 0.542806 | 5.820068 | 4.14607  | 0.001073 | 0.039677 | -0.64711 |
| Pisd      | 0.541938 | 5.468723 | 4.329231 | 0.000758 | 0.034093 | -0.3169  |
| C1ql1     | 0.541484 | 4.04955  | 4.453661 | 0.0006   | 0.031585 | -0.09455 |
| Fabp5     | 0.540961 | 4.681125 | 5.44915  | 9.88E-05 | 0.015433 | 1.611855 |
| Vwa3a     | 0.538269 | 6.699148 | 3.29028  | 0.005625 | 0.085212 | -2.21803 |
| Usp54     | 0.537625 | 6.730889 | 3.483467 | 0.003857 | 0.070922 | -1.8617  |
| Ripk3     | 0.537428 | 4.25789  | 4.219682 | 0.000933 | 0.037622 | -0.51401 |
| Pcdhga2   | 0.537099 | 4.653559 | 2.159912 | 0.049374 | 0.241574 | -4.22376 |
| Obp2a     | 0.536733 | 3.498672 | 4.170515 | 0.001024 | 0.039291 | -0.60286 |
| Slc10a6   | 0.535834 | 6.154148 | 2.233838 | 0.043052 | 0.226909 | -4.10116 |
| Fahd1     | 0.535726 | 6.21285  | 4.582204 | 0.000472 | 0.028689 | 0.133285 |
| Slc5a3    | 0.534844 | 4.37696  | 2.840176 | 0.013534 | 0.129716 | -3.04106 |
| Fbxo44    | 0.534844 | 6.744636 | 3.429184 | 0.004288 | 0.075071 | -1.96186 |
| Mt2       | 0.533813 | 10.72459 | 3.439569 | 0.004202 | 0.074406 | -1.9427  |
| Arhgap25  | 0.533654 | 4.689028 | 4.565367 | 0.000487 | 0.029068 | 0.103555 |
| Gm13287   | 0.533576 | 4.566593 | 2.774662 | 0.015368 | 0.138056 | -3.15913 |
| Bclaf1    | 0.532966 | 8.934126 | 4.832164 | 0.000298 | 0.024633 | 0.570413 |
| Tma7      | 0.532064 | 7.812907 | 3.809452 | 0.002048 | 0.053574 | -1.26132 |
| Decr2     | 0.53142  | 7.167402 | 3.865911 | 0.001836 | 0.05083  | -1.15777 |
| Zfp593    | 0.530996 | 4.303095 | 5.704085 | 6.36E-05 | 0.013916 | 2.025282 |
| Gm26534   | 0.530972 | 6.409529 | 3.788318 | 0.002133 | 0.054522 | -1.30013 |
| Mttp      | 0.530816 | 4.999132 | 4.530851 | 0.000519 | 0.029956 | 0.0425   |
| Hist1h1c  | 0.53064  | 6.851746 | 2.476426 | 0.027261 | 0.182517 | -3.68715 |
| Snord95   | 0.530565 | 4.820296 | 3.046487 | 0.009056 | 0.107259 | -2.66584 |
| Rfxank    | 0.529215 | 7.590942 | 3.602608 | 0.003058 | 0.063948 | -1.64194 |
| Ifitm3    | 0.528863 | 9.575304 | 2.741416 | 0.016389 | 0.142362 | -3.2188  |
| Grpel1    | 0.528219 | 7.418406 | 3.96932  | 0.001505 | 0.046069 | -0.96861 |
| Mir5121   | 0.527605 | 4.242562 | 3.326197 | 0.005243 | 0.082595 | -2.15183 |
| Cldn15    | 0.526788 | 5.155972 | 3.717016 | 0.002449 | 0.05782  | -1.43121 |
| Sik1      | 0.526645 | 8.003394 | 3.384875 | 0.004676 | 0.077965 | -2.04361 |
| Pcdhga4   | 0.526079 | 4.918638 | 3.059275 | 0.008833 | 0.106286 | -2.64245 |
| Spns2     | 0.526055 | 6.408698 | 4.574744 | 0.000479 | 0.02881  | 0.120116 |
| Mcm8      | 0.524028 | 4.221324 | 7.228881 | 5.49E-06 | 0.006504 | 4.281122 |
| Tmem198k  | 0.523085 | 5.564602 | 2.712314 | 0.017338 | 0.146604 | -3.27088 |
| Snord73a  | 0.522956 | 5.305423 | 3.037039 | 0.009225 | 0.108326 | -2.68312 |
| Mir1960   | 0.521233 | 4.246945 | 4.134336 | 0.001097 | 0.03993  | -0.66837 |
| Ubr7      | 0.520304 | 6.955953 | 5.348457 | 0.000118 | 0.016101 | 1.445769 |
| Ugdh      | 0.519036 | 6.993242 | 3.151337 | 0.007379 | 0.097013 | -2.47366 |
| Ift27     | 0.518229 | 5.129232 | 6.092233 | 3.31E-05 | 0.011546 | 2.634894 |
| 4933434E2 | 0.517402 | 4.252353 | 6.544105 | 1.59E-05 | 0.009173 | 3.314041 |
| Cdk2      | 0.517354 | 5.532115 | 3.559163 | 0.003328 | 0.066455 | -1.72205 |
| Tmco4     | 0.517103 | 5.107673 | 4.302331 | 0.000798 | 0.034854 | -0.36519 |

|            |          |          |          |          |          |          |
|------------|----------|----------|----------|----------|----------|----------|
| Tlr5       | 0.516717 | 5.146542 | 6.58097  | 1.50E-05 | 0.008856 | 3.367999 |
| Zmat1      | 0.516127 | 5.387621 | 4.553895 | 0.000498 | 0.029355 | 0.083278 |
| Map7       | 0.513855 | 6.895437 | 2.579035 | 0.022408 | 0.165796 | -3.50749 |
| Stap2      | 0.512756 | 6.679555 | 3.560441 | 0.00332  | 0.0664   | -1.71969 |
| Snord88c   | 0.512472 | 4.948293 | 2.807184 | 0.014429 | 0.13377  | -3.1006  |
| Ogdhl      | 0.511319 | 8.598921 | 3.679977 | 0.002632 | 0.060128 | -1.49939 |
| Iba57      | 0.510871 | 3.970849 | 6.608594 | 1.43E-05 | 0.008683 | 3.408288 |
| Slc29a3    | 0.509806 | 5.806335 | 3.412432 | 0.004431 | 0.076357 | -1.99277 |
| Mir677     | 0.509745 | 4.842601 | 3.45482  | 0.004079 | 0.073139 | -1.91456 |
| Folr2      | 0.508755 | 6.642724 | 2.483474 | 0.026898 | 0.181412 | -3.67489 |
| Mirlet7f-1 | 0.508586 | 3.683248 | 2.995832 | 0.009997 | 0.112245 | -2.75838 |
| Gm14703    | 0.50808  | 3.956758 | 3.600625 | 0.00307  | 0.064033 | -1.64559 |
| Plin3      | 0.507982 | 9.007897 | 4.278204 | 0.000835 | 0.035907 | -0.40856 |
| Eno3       | 0.507799 | 11.68977 | 4.066422 | 0.001249 | 0.042022 | -0.79167 |
| Pcdha6     | 0.507687 | 3.781431 | 5.551226 | 8.27E-05 | 0.014851 | 1.778616 |
| Lpcat3     | 0.507229 | 9.817091 | 3.223029 | 0.006415 | 0.090568 | -2.34187 |
| Gpc4       | 0.506483 | 5.86343  | 3.585979 | 0.003159 | 0.065281 | -1.6726  |
| Pgam2      | 0.505168 | 8.859355 | 4.652336 | 0.000414 | 0.027213 | 0.256744 |
| Gm15952    | 0.504964 | 4.603556 | 2.569231 | 0.022833 | 0.167271 | -3.52475 |
| A030001D   | 0.504449 | 5.022081 | 4.765035 | 0.000337 | 0.025389 | 0.453821 |
| Gtf3c3     | 0.50356  | 5.438629 | 6.085641 | 3.34E-05 | 0.011546 | 2.624742 |
| Gm16573    | 0.502594 | 4.2609   | 3.061217 | 0.0088   | 0.106193 | -2.63889 |
| Commd4     | 0.50177  | 7.372142 | 4.128461 | 0.00111  | 0.039942 | -0.67903 |
| Cdkn1a     | 0.501044 | 10.64473 | 2.208592 | 0.04512  | 0.230944 | -4.14323 |
| Ift122     | 0.500858 | 4.392193 | 4.161952 | 0.001041 | 0.039578 | -0.61835 |
| Tubgcp4    | 0.500692 | 6.756205 | 2.656746 | 0.019299 | 0.15437  | -3.36993 |
| Pdcd10     | 0.500414 | 4.42493  | 3.304874 | 0.005467 | 0.083887 | -2.19113 |
| Fbn1       | 0.499844 | 7.33586  | 2.398563 | 0.031603 | 0.196396 | -3.82181 |
| Pnpla7     | 0.49981  | 6.201077 | 3.522078 | 0.003578 | 0.068153 | -1.79046 |
| Gm16576    | 0.49919  | 4.661216 | 5.01126  | 0.000215 | 0.020963 | 0.87844  |
| Mir3057    | 0.49865  | 4.604143 | 3.678042 | 0.002641 | 0.060299 | -1.50295 |
| Hist1h1e   | 0.497711 | 4.401525 | 3.28558  | 0.005677 | 0.085579 | -2.22669 |
| Gm11465    | 0.497691 | 3.882228 | 4.703239 | 0.000377 | 0.026949 | 0.345963 |
| Rbp7       | 0.497125 | 5.559597 | 3.035199 | 0.009258 | 0.108326 | -2.68648 |
| Stxbp1     | 0.496514 | 5.886441 | 3.885919 | 0.001767 | 0.05008  | -1.12112 |
| Hmgxb3     | 0.495789 | 5.758311 | 4.210195 | 0.00095  | 0.037959 | -0.53114 |
| Elmod3     | 0.494704 | 8.004188 | 3.197035 | 0.006749 | 0.092901 | -2.38969 |
| Elac1      | 0.493822 | 5.325036 | 4.151182 | 0.001063 | 0.039677 | -0.63785 |
| Pla2g12a   | 0.493435 | 6.673638 | 2.853907 | 0.013178 | 0.127671 | -3.01624 |
| Tbl1xr1    | 0.492967 | 7.818261 | 3.625885 | 0.002923 | 0.062617 | -1.59903 |
| 2700062CC  | 0.491984 | 3.735819 | 4.112999 | 0.001143 | 0.04047  | -0.70707 |
| Mir5124a   | 0.491597 | 3.719025 | 4.117726 | 0.001133 | 0.040337 | -0.69849 |
| Mir28a     | 0.489851 | 3.721081 | 5.0485   | 0.000201 | 0.020075 | 0.941918 |
| Dpyd       | 0.489502 | 5.762329 | 4.244943 | 0.000889 | 0.037186 | -0.46845 |
| Metrn      | 0.489336 | 4.504434 | 4.831191 | 0.000298 | 0.024633 | 0.568729 |
| Polr3e     | 0.488939 | 4.610192 | 5.490026 | 9.20E-05 | 0.015238 | 1.678829 |
| C2cd2      | 0.488932 | 6.42985  | 4.212972 | 0.000945 | 0.037881 | -0.52612 |
| Itgb1bp2   | 0.488539 | 9.110806 | 3.862044 | 0.00185  | 0.051043 | -1.16486 |

|           |          |          |          |          |          |          |
|-----------|----------|----------|----------|----------|----------|----------|
| Abcb1b    | 0.488091 | 5.035387 | 3.788352 | 0.002133 | 0.054522 | -1.30007 |
| Gm3376    | 0.487074 | 3.758511 | 3.437965 | 0.004215 | 0.074422 | -1.94566 |
| Trpv4     | 0.486386 | 4.770537 | 5.358883 | 0.000116 | 0.016075 | 1.463038 |
| Ctla2b    | 0.486206 | 4.210144 | 2.910635 | 0.011802 | 0.120438 | -2.91345 |
| Slc25a34  | 0.485596 | 8.738729 | 2.575644 | 0.022554 | 0.166143 | -3.51346 |
| Fam32a    | 0.48544  | 5.849816 | 2.703707 | 0.017628 | 0.14745  | -3.28626 |
| Hs6st1    | 0.485087 | 6.142446 | 2.814225 | 0.014233 | 0.133007 | -3.0879  |
| Tmem143   | 0.485019 | 8.587236 | 3.380135 | 0.004719 | 0.078316 | -2.05236 |
| Ucp2      | 0.484768 | 9.99271  | 2.951175 | 0.010906 | 0.116412 | -2.83975 |
| LOC100502 | 0.483751 | 4.301283 | 3.11363  | 0.007943 | 0.100753 | -2.54286 |
| A730011C1 | 0.483741 | 4.366057 | 4.173189 | 0.001019 | 0.039213 | -0.59802 |
| Vdr       | 0.483704 | 4.564931 | 3.055298 | 0.008902 | 0.106753 | -2.64972 |
| 9130023H2 | 0.483507 | 5.051812 | 3.668153 | 0.002693 | 0.060969 | -1.52116 |
| Arhgap23  | 0.483107 | 5.32977  | 4.183385 | 0.000999 | 0.038881 | -0.57958 |
| Inca1     | 0.482785 | 4.10093  | 4.44613  | 0.000608 | 0.031585 | -0.10796 |
| Lacc1     | 0.482564 | 3.877757 | 6.361793 | 2.13E-05 | 0.010083 | 3.04399  |
| Athl1     | 0.482418 | 4.444497 | 4.380457 | 0.000688 | 0.033    | -0.22516 |
| Mgat4a    | 0.481669 | 5.20226  | 5.077849 | 0.000191 | 0.019641 | 0.991805 |
| Nkap      | 0.481493 | 5.343285 | 3.620398 | 0.002954 | 0.062839 | -1.60915 |
| Angptl3   | 0.481242 | 3.867493 | 4.323348 | 0.000767 | 0.034152 | -0.32745 |
| Tnfrsf1a  | 0.480957 | 7.696045 | 4.549697 | 0.000501 | 0.0294   | 0.075855 |
| Gm12942   | 0.480862 | 3.925815 | 4.512864 | 0.000537 | 0.030405 | 0.010628 |
| Wwox      | 0.480387 | 5.054484 | 3.722418 | 0.002424 | 0.057456 | -1.42127 |
| Sh3bgr    | 0.479987 | 8.175703 | 2.180311 | 0.047548 | 0.237359 | -4.19011 |
| Retnlg    | 0.479909 | 3.820521 | 3.311277 | 0.005399 | 0.08365  | -2.17933 |
| Smpd2     | 0.479906 | 7.31173  | 6.294328 | 2.37E-05 | 0.010535 | 2.942701 |
| Pcp4l1    | 0.479438 | 9.846815 | 4.734838 | 0.000356 | 0.026177 | 0.401179 |
| Zfp568    | 0.478414 | 5.668243 | 4.393092 | 0.000672 | 0.033    | -0.20257 |
| Mrps18b   | 0.477837 | 8.570624 | 5.844408 | 5.01E-05 | 0.012328 | 2.248456 |
| Vmp1      | 0.477559 | 8.144379 | 4.607455 | 0.00045  | 0.028061 | 0.177807 |
| Fkbpl     | 0.476939 | 4.54983  | 3.952824 | 0.001553 | 0.046803 | -0.99874 |
| Psm4      | 0.476766 | 8.266215 | 3.788212 | 0.002134 | 0.054522 | -1.30033 |
| Slc27a4   | 0.476223 | 5.024733 | 5.254311 | 0.000139 | 0.017535 | 1.289079 |
| Pik3r3    | 0.476149 | 5.259884 | 6.787661 | 1.08E-05 | 0.008528 | 3.6665   |
| Tie1      | 0.475654 | 7.911492 | 4.87882  | 0.000273 | 0.023519 | 0.651088 |
| Zbtb8os   | 0.475062 | 3.541486 | 3.027785 | 0.009393 | 0.108962 | -2.70003 |
| Mest      | 0.474731 | 4.628967 | 2.403927 | 0.031283 | 0.195797 | -3.81258 |
| Ifitm2    | 0.474609 | 5.388509 | 2.992525 | 0.010062 | 0.112317 | -2.76441 |
| Chrm4     | 0.474491 | 3.987164 | 4.895082 | 0.000265 | 0.0234   | 0.679135 |
| Ptp4a1    | 0.47408  | 7.619039 | 2.522896 | 0.02495  | 0.174974 | -3.60608 |
| Slc25a25  | 0.474067 | 4.562391 | 3.564682 | 0.003293 | 0.066281 | -1.71187 |
| Gprc5b    | 0.473809 | 6.291918 | 3.770166 | 0.002209 | 0.055202 | -1.33348 |
| Man2c1    | 0.47349  | 5.432546 | 3.308993 | 0.005423 | 0.083689 | -2.18354 |
| Gm13139   | 0.472734 | 4.16166  | 3.384747 | 0.004677 | 0.077965 | -2.04385 |
| C030037D1 | 0.472582 | 5.471642 | 4.890029 | 0.000268 | 0.02345  | 0.670423 |
| Smad1     | 0.472215 | 6.118595 | 6.16933  | 2.91E-05 | 0.01118  | 2.753097 |
| Kctd10    | 0.471914 | 5.399694 | 2.214757 | 0.044607 | 0.229592 | -4.13298 |
| Lrrc32    | 0.471646 | 6.012353 | 4.91867  | 0.000254 | 0.02321  | 0.719755 |

|           |          |          |          |          |          |          |
|-----------|----------|----------|----------|----------|----------|----------|
| Dclre1a   | 0.471592 | 5.524533 | 5.362248 | 0.000115 | 0.016075 | 1.468608 |
| B430319G1 | 0.470401 | 4.10426  | 2.969629 | 0.010521 | 0.114563 | -2.80615 |
| Ppp2r4    | 0.469252 | 6.651293 | 3.383457 | 0.004689 | 0.077965 | -2.04623 |
| 3110057O1 | 0.469184 | 8.90549  | 4.772922 | 0.000332 | 0.025389 | 0.467551 |
| Pxmp4     | 0.468845 | 9.080126 | 4.281541 | 0.00083  | 0.035743 | -0.40256 |
| Lig3      | 0.468072 | 6.373847 | 6.986288 | 7.94E-06 | 0.007613 | 3.946968 |
| Gm4117    | 0.466939 | 3.706696 | 3.778194 | 0.002175 | 0.054728 | -1.31873 |
| E2f3      | 0.46678  | 3.979402 | 2.8232   | 0.013988 | 0.131867 | -3.07171 |
| Tmed5     | 0.466688 | 6.873806 | 3.022467 | 0.009491 | 0.109638 | -2.70975 |
| Pcdhgb7   | 0.466668 | 6.389421 | 2.205271 | 0.045399 | 0.231751 | -4.14875 |
| Igkv9-123 | 0.466643 | 3.405603 | 5.074494 | 0.000192 | 0.019641 | 0.986109 |
| Ccpg1os   | 0.466485 | 7.724942 | 3.600744 | 0.00307  | 0.064033 | -1.64538 |
| Xrn2      | 0.466376 | 6.540968 | 4.886478 | 0.00027  | 0.023519 | 0.6643   |
| D19Bwg13  | 0.466017 | 5.390235 | 3.793219 | 0.002113 | 0.05449  | -1.29113 |
| 2610528J1 | 0.465946 | 3.745668 | 4.930869 | 0.000249 | 0.022985 | 0.740732 |
| Mir350    | 0.465057 | 3.445257 | 3.887318 | 0.001762 | 0.050025 | -1.11856 |
| Mthfd1l   | 0.465027 | 4.12973  | 4.197482 | 0.000973 | 0.038393 | -0.5541  |
| Gm15737   | 0.464589 | 4.073278 | 3.869461 | 0.001824 | 0.050655 | -1.15127 |
| 1110008F1 | 0.464437 | 9.235148 | 3.842426 | 0.001921 | 0.051918 | -1.20082 |
| Cyb5rl    | 0.46402  | 4.60229  | 3.002087 | 0.009876 | 0.111846 | -2.74696 |
| Aifm2     | 0.463813 | 5.863254 | 2.79862  | 0.014671 | 0.13478  | -3.11602 |
| Mir3089   | 0.463077 | 3.891695 | 3.879091 | 0.00179  | 0.050342 | -1.13362 |
| Ighv1-56  | 0.462792 | 4.669547 | 2.179362 | 0.047631 | 0.237443 | -4.19168 |
| Zscan29   | 0.462701 | 5.635159 | 4.057088 | 0.001272 | 0.042435 | -0.80865 |
| Cdc42ep5  | 0.462521 | 4.19765  | 2.641694 | 0.019867 | 0.156442 | -3.39667 |
| Lxn       | 0.461372 | 5.816298 | 2.604562 | 0.021337 | 0.162083 | -3.46243 |
| Ocel1     | 0.461317 | 5.616726 | 2.870256 | 0.012766 | 0.12534  | -2.98666 |
| Rpp38     | 0.461205 | 4.549939 | 3.365339 | 0.004857 | 0.079559 | -2.07965 |
| Polr2f    | 0.461019 | 7.779989 | 3.39437  | 0.00459  | 0.077427 | -2.02609 |
| 4930539J0 | 0.4607   | 4.873254 | 3.243504 | 0.006163 | 0.088614 | -2.30418 |
| Pkmyt1    | 0.460324 | 4.272317 | 2.781143 | 0.015176 | 0.137442 | -3.14748 |
| Gstm6     | 0.46013  | 4.03695  | 2.811759 | 0.014302 | 0.133251 | -3.09235 |
| Ado       | 0.460103 | 5.199615 | 3.73821  | 0.00235  | 0.057063 | -1.39223 |
| Cmss1     | 0.459757 | 7.90094  | 3.070152 | 0.008647 | 0.10507  | -2.62254 |
| Mir134    | 0.459479 | 5.01571  | 2.872785 | 0.012703 | 0.124972 | -2.98208 |
| Mir103-2  | 0.459435 | 4.124412 | 3.80634  | 0.00206  | 0.053574 | -1.26704 |
| Rnf170    | 0.459127 | 6.618724 | 3.127607 | 0.00773  | 0.098846 | -2.51722 |
| Rpl3l     | 0.459093 | 9.058648 | 3.457222 | 0.00406  | 0.072925 | -1.91013 |
| Mir151    | 0.458808 | 3.612135 | 4.768186 | 0.000335 | 0.025389 | 0.459308 |
| BC029722  | 0.458313 | 6.516917 | 3.116456 | 0.0079   | 0.100352 | -2.53768 |
| 2810474O1 | 0.458137 | 7.332421 | 4.198254 | 0.000972 | 0.038393 | -0.5527  |
| Mrpl13    | 0.457404 | 6.640974 | 6.424332 | 1.92E-05 | 0.009991 | 3.137228 |
| lce1      | 0.457079 | 6.643741 | 4.14183  | 0.001082 | 0.03972  | -0.65479 |
| Snhg4     | 0.457038 | 5.365726 | 3.477776 | 0.0039   | 0.071348 | -1.8722  |
| 2900005J1 | 0.456455 | 3.731808 | 6.086493 | 3.34E-05 | 0.011546 | 2.626056 |
| Sfn5os    | 0.456299 | 4.28894  | 4.487545 | 0.000563 | 0.03097  | -0.0343  |
| Ndufaf3   | 0.456238 | 7.523692 | 4.243569 | 0.000891 | 0.037186 | -0.47093 |
| Nit1      | 0.455634 | 7.638462 | 4.691886 | 0.000385 | 0.027042 | 0.326093 |



|           |          |          |          |          |          |          |
|-----------|----------|----------|----------|----------|----------|----------|
| LOC102637 | 0.455607 | 3.846944 | 3.5743   | 0.003232 | 0.065851 | -1.69413 |
| Alox5     | 0.455037 | 5.752909 | 2.887387 | 0.012348 | 0.122737 | -2.95562 |
| Nr2c2ap   | 0.454993 | 4.4246   | 4.851925 | 0.000287 | 0.024199 | 0.604619 |
| Zfp709    | 0.454637 | 4.522892 | 4.018285 | 0.00137  | 0.043852 | -0.8793  |
| Onecut1   | 0.454495 | 4.127638 | 4.055075 | 0.001277 | 0.042541 | -0.81231 |
| Hbb-bs    | 0.454135 | 3.432309 | 2.812478 | 0.014282 | 0.133224 | -3.09105 |
| B430212CC | 0.454135 | 4.699887 | 3.13518  | 0.007616 | 0.09819  | -2.50333 |
| A830082K1 | 0.453579 | 4.570458 | 3.536317 | 0.00348  | 0.067579 | -1.76419 |
| Abcc3     | 0.453047 | 4.121299 | 5.080602 | 0.00019  | 0.019641 | 0.996478 |
| Gm5069    | 0.452901 | 5.07606  | 3.924143 | 0.001641 | 0.048299 | -1.05116 |
| Ly6c2     | 0.452596 | 7.32314  | 3.040324 | 0.009166 | 0.108145 | -2.67711 |
| Esd       | 0.452155 | 4.80876  | 3.746487 | 0.002313 | 0.056542 | -1.37701 |
| Cd248     | 0.451864 | 5.541036 | 3.213453 | 0.006536 | 0.091305 | -2.35949 |
| Plxna2    | 0.451694 | 7.473731 | 5.086838 | 0.000188 | 0.019604 | 1.00706  |
| Mafb      | 0.451592 | 6.376024 | 3.175335 | 0.007041 | 0.094671 | -2.42958 |
| Mettl4    | 0.45145  | 4.928036 | 2.65785  | 0.019258 | 0.154199 | -3.36797 |
| Pmm1      | 0.451267 | 5.907274 | 3.627708 | 0.002913 | 0.062595 | -1.59567 |
| Atp5c1-ps | 0.451106 | 3.505908 | 2.658972 | 0.019217 | 0.154113 | -3.36598 |
| 1110059E2 | 0.450853 | 5.629398 | 4.356021 | 0.000721 | 0.033465 | -0.26889 |
| Chchd6    | 0.450514 | 5.115882 | 2.914872 | 0.011705 | 0.120141 | -2.90575 |
| 5033428I2 | 0.450192 | 4.234617 | 3.773717 | 0.002194 | 0.054941 | -1.32696 |
| Gm26615   | 0.449877 | 3.950036 | 2.379717 | 0.032748 | 0.198877 | -3.85417 |
| Tcrg-C1   | 0.449822 | 3.670305 | 2.865986 | 0.012872 | 0.125887 | -2.99439 |
| 2310075C1 | 0.449602 | 4.299752 | 3.28393  | 0.005695 | 0.08565  | -2.22973 |
| Poln      | 0.449382 | 3.831299 | 5.630487 | 7.21E-05 | 0.014445 | 1.906979 |
| Nln       | 0.4493   | 5.732951 | 4.406242 | 0.000656 | 0.032868 | -0.17908 |
| Ndufs8    | 0.449273 | 10.52249 | 4.764183 | 0.000337 | 0.025389 | 0.452337 |
| Ptpre     | 0.449198 | 5.29247  | 3.987668 | 0.001453 | 0.045198 | -0.93512 |
| Fdft1     | 0.448975 | 7.681681 | 3.524244 | 0.003563 | 0.068153 | -1.78646 |
| Ypel3     | 0.448758 | 7.774021 | 3.255793 | 0.006017 | 0.087839 | -2.28156 |
| Ifna15    | 0.448507 | 4.405568 | 3.344616 | 0.005058 | 0.080917 | -2.11787 |
| LOC102637 | 0.447829 | 3.630246 | 2.569686 | 0.022813 | 0.167271 | -3.52395 |
| Fbxo28    | 0.447605 | 6.31153  | 4.207649 | 0.000954 | 0.038082 | -0.53573 |
| Nrm       | 0.447208 | 4.79473  | 4.715997 | 0.000368 | 0.026586 | 0.368272 |
| Zfp2      | 0.44672  | 4.305717 | 4.073733 | 0.001232 | 0.041863 | -0.77838 |
| Mgll      | 0.446662 | 7.981144 | 3.117286 | 0.007887 | 0.100255 | -2.53616 |
| Ldb2      | 0.446547 | 5.729458 | 4.586471 | 0.000468 | 0.028673 | 0.140814 |
| Polr2l    | 0.44632  | 4.718114 | 3.093959 | 0.008255 | 0.102862 | -2.57893 |
| Hmga2-ps  | 0.445964 | 3.86792  | 4.451788 | 0.000602 | 0.031585 | -0.09789 |
| Prpf6     | 0.445299 | 7.476881 | 3.669773 | 0.002684 | 0.060939 | -1.51818 |
| Mpp1      | 0.445299 | 6.04166  | 3.088731 | 0.008339 | 0.103399 | -2.58851 |
| Aptx      | 0.444994 | 5.547041 | 3.065884 | 0.00872  | 0.105691 | -2.63035 |
| Tcaim     | 0.444553 | 7.957791 | 5.702013 | 6.38E-05 | 0.013916 | 2.021963 |
| Anxa2     | 0.444533 | 6.526466 | 3.477122 | 0.003905 | 0.071387 | -1.87341 |
| Dock8     | 0.444383 | 4.685571 | 3.110183 | 0.007997 | 0.101124 | -2.54919 |
| Pigv      | 0.444044 | 5.491065 | 3.24592  | 0.006134 | 0.088386 | -2.29973 |
| Tstd3     | 0.443868 | 6.215912 | 3.272113 | 0.005828 | 0.086626 | -2.2515  |
| Gm5640    | 0.443112 | 4.214476 | 3.15096  | 0.007385 | 0.097033 | -2.47436 |

|           |          |          |          |          |          |          |
|-----------|----------|----------|----------|----------|----------|----------|
| Mmp14     | 0.442932 | 6.911245 | 2.509802 | 0.025581 | 0.176732 | -3.62897 |
| Mir107    | 0.44243  | 5.231957 | 2.811629 | 0.014305 | 0.133251 | -3.09258 |
| 9330188PC | 0.442288 | 5.769809 | 2.321389 | 0.036551 | 0.208792 | -3.95368 |
| Cad       | 0.442268 | 4.598575 | 3.788225 | 0.002134 | 0.054522 | -1.3003  |
| Pthr2     | 0.442071 | 3.942064 | 4.200312 | 0.000968 | 0.03837  | -0.54899 |
| Asap2     | 0.441901 | 5.563236 | 3.488846 | 0.003817 | 0.070604 | -1.85177 |
| Gm16794   | 0.440769 | 4.047207 | 5.108242 | 0.000181 | 0.019303 | 1.043335 |
| Grhpr     | 0.440111 | 8.273115 | 3.252749 | 0.006053 | 0.088068 | -2.28716 |
| Junos     | 0.439443 | 4.171056 | 6.036016 | 3.63E-05 | 0.011961 | 2.548099 |
| Esrrb     | 0.439365 | 5.150672 | 3.020098 | 0.009535 | 0.109891 | -2.71408 |
| Aff3      | 0.439351 | 4.151967 | 3.85911  | 0.00186  | 0.051219 | -1.17023 |
| Rhno1     | 0.438985 | 4.837819 | 4.987043 | 0.000225 | 0.021397 | 0.837052 |
| Pbld2     | 0.438839 | 3.950539 | 2.721777 | 0.017024 | 0.145017 | -3.25396 |
| Srp54c    | 0.438382 | 7.607049 | 3.564046 | 0.003297 | 0.066309 | -1.71305 |
| Ly6a      | 0.437893 | 11.80781 | 4.309814 | 0.000786 | 0.034664 | -0.35175 |
| Gpx1      | 0.437859 | 8.332699 | 3.239209 | 0.006215 | 0.088898 | -2.31209 |
| Ndufv3    | 0.437663 | 8.401611 | 3.549985 | 0.003388 | 0.066958 | -1.73898 |
| C530050E1 | 0.43649  | 4.03343  | 2.453498 | 0.028477 | 0.186905 | -3.72696 |
| Gm14532   | 0.436395 | 3.581804 | 5.544956 | 8.36E-05 | 0.014851 | 1.76842  |
| Ssna1     | 0.436354 | 5.41528  | 2.356769 | 0.034197 | 0.202542 | -3.89343 |
| Ascc1     | 0.435554 | 5.477868 | 5.403196 | 0.000107 | 0.015832 | 1.53625  |
| Sgk1      | 0.435228 | 7.439131 | 4.54335  | 0.000507 | 0.029679 | 0.064627 |
| Snord53   | 0.434848 | 5.032366 | 4.499654 | 0.00055  | 0.030412 | -0.01281 |
| Pcsk7     | 0.434774 | 4.994893 | 4.248245 | 0.000884 | 0.037172 | -0.4625  |
| Gpr160    | 0.43394  | 4.667328 | 4.109003 | 0.001152 | 0.040664 | -0.71432 |
| Taf13     | 0.433472 | 6.085388 | 4.006101 | 0.001402 | 0.044348 | -0.9015  |
| Hdc       | 0.433394 | 4.199933 | 5.061323 | 0.000196 | 0.019937 | 0.96373  |
| Snord92   | 0.432977 | 4.046322 | 3.828257 | 0.001975 | 0.052335 | -1.22681 |
| Ighv1-22  | 0.432895 | 3.304827 | 4.156001 | 0.001053 | 0.039677 | -0.62913 |
| Mir3098   | 0.432804 | 4.040214 | 3.146496 | 0.007449 | 0.097522 | -2.48255 |
| Trp53rka  | 0.432546 | 4.103887 | 3.026309 | 0.00942  | 0.109124 | -2.70273 |
| Arhgap32  | 0.431824 | 5.963796 | 3.785357 | 0.002145 | 0.054522 | -1.30557 |
| Klhl33    | 0.431695 | 5.117377 | 3.063807 | 0.008755 | 0.106012 | -2.63415 |
| Nop9      | 0.431664 | 4.926607 | 3.641218 | 0.002837 | 0.062253 | -1.57078 |
| Zfp629    | 0.431661 | 4.410004 | 5.951099 | 4.18E-05 | 0.01211  | 2.41603  |
| Aven      | 0.431241 | 5.061323 | 5.587065 | 7.78E-05 | 0.014851 | 1.836781 |
| 1700052K1 | 0.431105 | 4.799862 | 3.113128 | 0.007951 | 0.1008   | -2.54379 |
| Ankrd44   | 0.430617 | 5.321591 | 3.648533 | 0.002797 | 0.061834 | -1.5573  |
| Mzt2      | 0.430122 | 4.387668 | 4.583343 | 0.000471 | 0.028689 | 0.135295 |
| Bnip3     | 0.430101 | 8.2144   | 3.408933 | 0.004461 | 0.076432 | -1.99923 |
| 8430431K1 | 0.429847 | 4.512938 | 4.390423 | 0.000676 | 0.033    | -0.20734 |
| 2010320M  | 0.429664 | 4.660633 | 4.234826 | 0.000906 | 0.037491 | -0.48669 |
| Fbxl8     | 0.429359 | 4.438312 | 4.808034 | 0.000311 | 0.025115 | 0.528574 |
| Xpnpep3   | 0.429111 | 5.355994 | 2.397782 | 0.031649 | 0.196427 | -3.82315 |
| Art1      | 0.428657 | 9.650526 | 2.802812 | 0.014552 | 0.134134 | -3.10847 |
| Gm14210   | 0.428396 | 3.726079 | 3.956939 | 0.001541 | 0.046713 | -0.99122 |
| Pxylp1    | 0.42827  | 4.368432 | 3.410932 | 0.004444 | 0.076357 | -1.99554 |
| Recql5    | 0.428118 | 4.309436 | 3.51578  | 0.003622 | 0.068731 | -1.80208 |

|           |          |          |          |          |          |          |
|-----------|----------|----------|----------|----------|----------|----------|
| Abcb1a    | 0.428006 | 7.657362 | 3.92382  | 0.001642 | 0.048299 | -1.05175 |
| Ring1     | 0.427334 | 5.056115 | 3.504931 | 0.003699 | 0.069541 | -1.8221  |
| Gm12505   | 0.427155 | 3.720657 | 5.766338 | 5.72E-05 | 0.013041 | 2.124678 |
| Snora7a   | 0.427077 | 4.623857 | 2.548728 | 0.023747 | 0.170986 | -3.5608  |
| Fdx1      | 0.426473 | 6.549011 | 4.074745 | 0.001229 | 0.041863 | -0.77654 |
| Eid3      | 0.426432 | 4.218424 | 3.310922 | 0.005402 | 0.08365  | -2.17999 |
| Coq4      | 0.426324 | 7.315375 | 3.145336 | 0.007466 | 0.097589 | -2.48468 |
| Tgfbrap1  | 0.426297 | 5.587986 | 3.725882 | 0.002407 | 0.057456 | -1.4149  |
| Isoc2a    | 0.426297 | 6.035414 | 3.983018 | 0.001466 | 0.045319 | -0.94361 |
| Rrp12     | 0.426127 | 5.816579 | 2.95717  | 0.010779 | 0.115806 | -2.82884 |
| Txn2      | 0.426053 | 9.549289 | 4.74071  | 0.000352 | 0.025999 | 0.411425 |
| Trit1     | 0.425693 | 5.009722 | 3.851463 | 0.001888 | 0.051557 | -1.18425 |
| Retsat    | 0.425632 | 8.398526 | 3.373263 | 0.004783 | 0.078798 | -2.06503 |
| Mbd1      | 0.42513  | 7.025716 | 2.307294 | 0.037531 | 0.211665 | -3.97758 |
| 1700057H1 | 0.425022 | 3.630968 | 3.53145  | 0.003513 | 0.067803 | -1.77317 |
| AU021092  | 0.424655 | 5.545498 | 2.519614 | 0.025106 | 0.175323 | -3.61182 |
| Tmem220   | 0.423971 | 4.314524 | 3.208277 | 0.006602 | 0.091915 | -2.36901 |
| D130017N1 | 0.423967 | 4.777088 | 2.541908 | 0.024059 | 0.172069 | -3.57276 |
| Atpaf1    | 0.423869 | 7.749044 | 3.614446 | 0.002989 | 0.063125 | -1.62012 |
| Nod1      | 0.423686 | 5.458262 | 4.599437 | 0.000457 | 0.028131 | 0.163679 |
| Fam149a   | 0.423208 | 4.353205 | 4.819234 | 0.000305 | 0.024766 | 0.548004 |
| Olfr47    | 0.422885 | 3.876156 | 2.997052 | 0.009973 | 0.112245 | -2.75615 |
| Sox17     | 0.422757 | 6.627231 | 3.558508 | 0.003333 | 0.066455 | -1.72326 |
| Psmc5     | 0.422458 | 7.165493 | 4.064309 | 0.001254 | 0.042022 | -0.79552 |
| Gm6042    | 0.422265 | 3.985953 | 3.150136 | 0.007397 | 0.097138 | -2.47587 |
| Gm10635   | 0.421909 | 4.075863 | 3.555227 | 0.003354 | 0.066677 | -1.72931 |
| Tmem88    | 0.421482 | 8.71009  | 3.865364 | 0.001838 | 0.05083  | -1.15877 |
| Itga3     | 0.421394 | 5.261478 | 3.725017 | 0.002411 | 0.057456 | -1.41649 |
| Saa2      | 0.421329 | 3.347302 | 3.842504 | 0.001921 | 0.051918 | -1.20068 |
| Gm11787   | 0.420959 | 4.362335 | 3.081561 | 0.008457 | 0.104078 | -2.60164 |
| Ezh1      | 0.420831 | 9.255337 | 3.489609 | 0.003811 | 0.070551 | -1.85037 |
| Haghl     | 0.420675 | 5.149302 | 3.584828 | 0.003166 | 0.065319 | -1.67472 |
| Slc35c1   | 0.42018  | 4.673469 | 3.454613 | 0.004081 | 0.073139 | -1.91494 |
| Parp4     | 0.41984  | 7.354614 | 3.626058 | 0.002922 | 0.062617 | -1.59872 |
| Fkbp11    | 0.419437 | 4.538495 | 3.867565 | 0.00183  | 0.050728 | -1.15474 |
| Arf5      | 0.419162 | 7.141059 | 2.577339 | 0.022481 | 0.165987 | -3.51047 |
| Ssxb10    | 0.418752 | 3.799057 | 2.662097 | 0.019101 | 0.15365  | -3.36042 |
| LOC102634 | 0.418308 | 4.004727 | 3.811461 | 0.00204  | 0.053435 | -1.25764 |
| Thrap3    | 0.417467 | 8.983473 | 3.897602 | 0.001727 | 0.049617 | -1.09973 |
| 221040812 | 0.416504 | 4.924235 | 5.089056 | 0.000187 | 0.019604 | 1.010821 |
| Adcy4     | 0.416389 | 6.840844 | 3.903017 | 0.001709 | 0.049243 | -1.08981 |
| Sult1a1   | 0.416355 | 8.51319  | 2.489044 | 0.026614 | 0.180329 | -3.66519 |
| Ctla4     | 0.415466 | 4.21286  | 2.522682 | 0.02496  | 0.174974 | -3.60645 |
| Med8      | 0.41512  | 5.813354 | 2.769517 | 0.015522 | 0.138653 | -3.16837 |
| Rbm3os    | 0.4147   | 3.672845 | 3.905222 | 0.001702 | 0.049196 | -1.08578 |
| 493040502 | 0.414697 | 4.597648 | 4.068392 | 0.001244 | 0.041978 | -0.78809 |
| Gm16062   | 0.414686 | 3.970364 | 3.232484 | 0.006297 | 0.089626 | -2.32447 |
| Gm6642    | 0.414642 | 3.858444 | 2.913389 | 0.011739 | 0.120438 | -2.90845 |

|           |          |          |          |          |          |          |
|-----------|----------|----------|----------|----------|----------|----------|
| Gdf6      | 0.414456 | 3.693149 | 3.731742 | 0.00238  | 0.057429 | -1.40412 |
| Gm2696    | 0.413923 | 4.89316  | 3.408552 | 0.004464 | 0.076436 | -1.99993 |
| Pilra     | 0.413754 | 3.956226 | 3.044149 | 0.009098 | 0.107647 | -2.67012 |
| Caprin2   | 0.413679 | 4.843233 | 2.449498 | 0.028694 | 0.187619 | -3.73389 |
| Ugt1a7c   | 0.413517 | 3.970105 | 2.228055 | 0.043518 | 0.227761 | -4.11081 |
| Dpysl4    | 0.412754 | 4.798336 | 3.513066 | 0.003641 | 0.069031 | -1.80709 |
| Ipp       | 0.412001 | 4.5727   | 3.796428 | 0.0021   | 0.054401 | -1.28524 |
| Proser3   | 0.411791 | 4.73861  | 2.303316 | 0.037812 | 0.212306 | -3.98432 |
| Pdzd11    | 0.411167 | 7.043474 | 3.072431 | 0.008609 | 0.104809 | -2.61836 |
| Mypn      | 0.411051 | 9.52063  | 4.478609 | 0.000573 | 0.031216 | -0.05018 |
| Atg10     | 0.410923 | 7.751848 | 2.896622 | 0.012128 | 0.121573 | -2.93888 |
| Stx12     | 0.410828 | 7.157074 | 4.219345 | 0.000933 | 0.037622 | -0.51462 |
| Gnb4      | 0.410292 | 5.864    | 3.191551 | 0.006822 | 0.093296 | -2.39977 |
| G530011O  | 0.410129 | 4.218167 | 3.36125  | 0.004896 | 0.079707 | -2.08719 |
| Snhg1     | 0.40998  | 5.425856 | 2.848857 | 0.013308 | 0.12843  | -3.02537 |
| Slc22a15  | 0.409787 | 4.379372 | 4.633264 | 0.000429 | 0.027437 | 0.22323  |
| 2610044O  | 0.409329 | 6.745517 | 2.70448  | 0.017602 | 0.147342 | -3.28488 |
| Elk4      | 0.409132 | 6.450823 | 4.913476 | 0.000257 | 0.02321  | 0.710817 |
| C230037L1 | 0.408617 | 3.86064  | 3.200782 | 0.0067   | 0.092633 | -2.38279 |
| Gtf2h3    | 0.408162 | 5.902812 | 4.466051 | 0.000586 | 0.031294 | -0.07251 |
| Pex5      | 0.407315 | 5.158735 | 3.232391 | 0.006298 | 0.089626 | -2.32464 |
| Jund      | 0.407233 | 8.855309 | 4.41738  | 0.000642 | 0.032715 | -0.15921 |
| Casc4     | 0.407199 | 5.767402 | 2.382318 | 0.032588 | 0.198515 | -3.84971 |
| Lrrk2     | 0.407118 | 6.309516 | 4.351119 | 0.000727 | 0.033614 | -0.27767 |
| Slc25a45  | 0.406908 | 5.126305 | 3.486623 | 0.003834 | 0.0707   | -1.85588 |
| Lnx1      | 0.406582 | 6.452477 | 3.469786 | 0.003962 | 0.071814 | -1.88694 |
| Ankmy2    | 0.406487 | 6.426714 | 4.191269 | 0.000985 | 0.038604 | -0.56532 |
| Ficd      | 0.406019 | 4.247036 | 3.366057 | 0.004851 | 0.079559 | -2.07832 |
| Gm38515   | 0.405826 | 3.166048 | 2.752953 | 0.016028 | 0.140682 | -3.19811 |
| Atg2a     | 0.405579 | 7.184886 | 3.576887 | 0.003215 | 0.06579  | -1.68936 |
| Ptk2b     | 0.405545 | 5.146783 | 2.312377 | 0.037175 | 0.21051  | -3.96897 |
| Pex12     | 0.405423 | 6.403558 | 3.876306 | 0.0018   | 0.05036  | -1.13873 |
| Rps12l2   | 0.405392 | 3.979958 | 3.255753 | 0.006017 | 0.087839 | -2.28163 |
| Ephb3     | 0.40488  | 4.995246 | 3.422511 | 0.004344 | 0.075672 | -1.97418 |
| Mrps31    | 0.4045   | 7.55186  | 4.028703 | 0.001343 | 0.04352  | -0.86032 |
| Taco1     | 0.404466 | 6.740319 | 3.881574 | 0.001782 | 0.050272 | -1.12908 |
| Gnl1      | 0.403503 | 5.405202 | 4.391926 | 0.000674 | 0.033    | -0.20466 |
| Tppp3     | 0.403476 | 6.906002 | 2.29044  | 0.038735 | 0.214563 | -4.00608 |
| Ablim3    | 0.403246 | 8.335249 | 3.74532  | 0.002318 | 0.056614 | -1.37915 |
| Frem2     | 0.403161 | 4.668703 | 4.563037 | 0.000489 | 0.02909  | 0.099438 |
| Wdr24     | 0.402771 | 5.045787 | 5.163467 | 0.000164 | 0.01849  | 1.136617 |
| Adat1     | 0.402615 | 4.119276 | 3.129671 | 0.007698 | 0.098702 | -2.51344 |
| 2010012O  | 0.402479 | 5.312893 | 2.3027   | 0.037856 | 0.212307 | -3.98536 |
| Cyp3a11   | 0.401906 | 4.190455 | 2.952495 | 0.010878 | 0.116242 | -2.83735 |
| Cpt2      | 0.401883 | 10.1775  | 3.978335 | 0.001479 | 0.045559 | -0.95215 |
| 1700084J1 | 0.401798 | 3.919242 | 3.730202 | 0.002387 | 0.057456 | -1.40696 |
| Gm15991   | 0.401693 | 4.145426 | 5.212759 | 0.00015  | 0.017742 | 1.219497 |
| Dennd5b   | 0.401652 | 6.136373 | 4.381417 | 0.000687 | 0.033    | -0.22344 |

|            |          |          |          |          |          |          |
|------------|----------|----------|----------|----------|----------|----------|
| Rpph1      | 0.401082 | 9.813497 | 3.183144 | 0.006935 | 0.094011 | -2.41522 |
| Cdr2       | 0.400492 | 5.124888 | 2.728289 | 0.016811 | 0.144225 | -3.24231 |
| Cpeb4      | 0.39978  | 8.624044 | 3.784974 | 0.002147 | 0.054522 | -1.30627 |
| Prr5       | 0.399709 | 4.30687  | 2.916054 | 0.011678 | 0.120141 | -2.90361 |
| Vamp8      | 0.399258 | 5.894128 | 2.534825 | 0.024387 | 0.17274  | -3.58519 |
| 2610307P1  | 0.39876  | 4.655597 | 3.421516 | 0.004353 | 0.075672 | -1.97601 |
| Pigs       | 0.398634 | 6.024512 | 3.209097 | 0.006592 | 0.091856 | -2.3675  |
| Park2      | 0.398397 | 5.178202 | 3.21444  | 0.006523 | 0.09126  | -2.35767 |
| Nop16      | 0.39839  | 4.504696 | 3.917368 | 0.001663 | 0.048406 | -1.06355 |
| Lsm5       | 0.398146 | 4.016619 | 2.82051  | 0.014061 | 0.132281 | -3.07657 |
| Uchl3      | 0.398109 | 3.439696 | 3.409    | 0.00446  | 0.076432 | -1.9991  |
| Zswim7     | 0.398065 | 6.219377 | 3.048524 | 0.00902  | 0.107057 | -2.66211 |
| Ffar3      | 0.397651 | 3.554376 | 2.797394 | 0.014706 | 0.134851 | -3.11823 |
| Alpk2      | 0.397583 | 9.510315 | 3.527893 | 0.003537 | 0.068063 | -1.77973 |
| Mir106b    | 0.397319 | 3.767426 | 3.557088 | 0.003342 | 0.066539 | -1.72588 |
| Adsl       | 0.396884 | 7.899126 | 3.348073 | 0.005024 | 0.080753 | -2.11149 |
| Brpf3      | 0.396732 | 4.745078 | 2.405014 | 0.031219 | 0.195641 | -3.81071 |
| Vaultrc5   | 0.39664  | 3.61222  | 4.36607  | 0.000707 | 0.033174 | -0.25089 |
| Hrc        | 0.396512 | 9.701511 | 3.965832 | 0.001515 | 0.046265 | -0.97498 |
| Suox       | 0.396193 | 6.554216 | 3.929892 | 0.001623 | 0.04804  | -1.04065 |
| Mkl1       | 0.395867 | 4.947771 | 4.380007 | 0.000689 | 0.033    | -0.22596 |
| Armt1      | 0.395359 | 4.454108 | 3.19893  | 0.006724 | 0.092763 | -2.3862  |
| AI593442   | 0.395328 | 3.882397 | 4.839731 | 0.000294 | 0.024495 | 0.583518 |
| 4732416N1  | 0.394674 | 4.451569 | 2.846453 | 0.01337  | 0.128731 | -3.02972 |
| Col4a2     | 0.394647 | 7.045956 | 2.356804 | 0.034195 | 0.202542 | -3.89337 |
| Gm15915    | 0.394084 | 3.750834 | 3.73539  | 0.002363 | 0.05732  | -1.39741 |
| Jak3       | 0.393907 | 6.257826 | 2.838878 | 0.013568 | 0.129834 | -3.04341 |
| Tpcn1      | 0.393656 | 6.886932 | 3.451365 | 0.004107 | 0.073296 | -1.92093 |
| Eif2ak2    | 0.393636 | 4.795614 | 2.758578 | 0.015854 | 0.13994  | -3.18802 |
| Olfr1331   | 0.393548 | 3.296058 | 3.38541  | 0.004671 | 0.077965 | -2.04262 |
| Mir1929    | 0.393158 | 4.025355 | 5.592745 | 7.70E-05 | 0.014851 | 1.84598  |
| Ncs1       | 0.393039 | 4.343085 | 3.820753 | 0.002003 | 0.052873 | -1.24058 |
| Cam1       | 0.39291  | 4.951175 | 3.537475 | 0.003472 | 0.067579 | -1.76206 |
| Hsd17b4    | 0.392646 | 9.242872 | 3.871069 | 0.001818 | 0.050594 | -1.14832 |
| Slc39a8    | 0.392612 | 4.134945 | 2.879261 | 0.012544 | 0.124294 | -2.97035 |
| Mrpl42     | 0.392598 | 7.813487 | 2.347243 | 0.034816 | 0.204329 | -3.90969 |
| Anxa3      | 0.392524 | 7.554498 | 3.956353 | 0.001543 | 0.046713 | -0.99229 |
| Cd3eap     | 0.392493 | 5.034137 | 3.193181 | 0.0068   | 0.093212 | -2.39677 |
| Mirlet7a-2 | 0.392368 | 3.753557 | 2.67298  | 0.018705 | 0.152222 | -3.34105 |
| Gm13427    | 0.392334 | 3.947225 | 5.481607 | 9.34E-05 | 0.01527  | 1.665056 |
| Commd5     | 0.391971 | 4.983583 | 3.637874 | 0.002856 | 0.06233  | -1.57694 |
| Pfkfb1     | 0.391893 | 6.136376 | 2.168692 | 0.04858  | 0.239939 | -4.20929 |
| Map4k2     | 0.391663 | 6.508657 | 4.003156 | 0.00141  | 0.044486 | -0.90687 |
| Nek1       | 0.391629 | 5.459486 | 2.807328 | 0.014425 | 0.13377  | -3.10033 |
| Mospd2     | 0.391317 | 4.998881 | 3.857141 | 0.001868 | 0.051301 | -1.17384 |
| Rras       | 0.391073 | 10.14768 | 3.187873 | 0.006871 | 0.093339 | -2.40653 |
| Gch1       | 0.390825 | 4.255715 | 4.987368 | 0.000225 | 0.021397 | 0.837608 |
| Hist2h2bb  | 0.390791 | 3.541424 | 2.90791  | 0.011864 | 0.120536 | -2.91839 |

|           |          |          |          |          |          |          |
|-----------|----------|----------|----------|----------|----------|----------|
| Mrps30    | 0.39072  | 7.33273  | 5.68137  | 6.61E-05 | 0.014168 | 1.988862 |
| Ankrd49   | 0.390076 | 5.762909 | 2.446163 | 0.028876 | 0.188316 | -3.73967 |
| 4930523CC | 0.389906 | 6.568651 | 3.062127 | 0.008784 | 0.106107 | -2.63723 |
| Stra13    | 0.389838 | 6.474053 | 2.55332  | 0.02354  | 0.170415 | -3.55273 |
| Mir3095   | 0.389672 | 3.668876 | 4.147382 | 0.00107  | 0.039677 | -0.64473 |
| Pxdn      | 0.389269 | 6.142225 | 3.264057 | 0.00592  | 0.087289 | -2.26634 |
| Lst1      | 0.389147 | 3.45914  | 3.189455 | 0.00685  | 0.093296 | -2.40362 |
| Sepsecs   | 0.388963 | 5.431624 | 5.629871 | 7.22E-05 | 0.014445 | 1.905985 |
| Rpp40     | 0.388926 | 4.533493 | 3.9999   | 0.001419 | 0.044615 | -0.91281 |
| Wdr5      | 0.388882 | 5.681746 | 2.741702 | 0.01638  | 0.142333 | -3.21828 |
| Wdr18     | 0.388441 | 7.197313 | 3.202215 | 0.006681 | 0.092477 | -2.38016 |
| Arap2     | 0.388285 | 5.798798 | 3.136768 | 0.007592 | 0.09806  | -2.50041 |
| Rpusd3    | 0.388075 | 5.456733 | 2.395248 | 0.031801 | 0.196662 | -3.82751 |
| Tgfbr1    | 0.388075 | 5.013048 | 3.029452 | 0.009362 | 0.108872 | -2.69698 |
| Ccdc59    | 0.387838 | 6.719309 | 3.004053 | 0.009838 | 0.111523 | -2.74337 |
| Adig      | 0.38776  | 3.747672 | 4.401852 | 0.000661 | 0.032994 | -0.18692 |
| Rars2     | 0.387709 | 6.179694 | 4.288164 | 0.000819 | 0.035483 | -0.39065 |
| Cib1      | 0.387672 | 4.388334 | 4.355449 | 0.000722 | 0.033465 | -0.26991 |
| Olf727    | 0.38766  | 3.543276 | 2.930438 | 0.011355 | 0.118912 | -2.87747 |
| Trps1     | 0.38756  | 5.823012 | 3.918563 | 0.001659 | 0.048406 | -1.06137 |
| Klhl8     | 0.387288 | 4.48759  | 3.575204 | 0.003226 | 0.06579  | -1.69247 |
| Dera      | 0.387268 | 4.639923 | 3.567103 | 0.003277 | 0.066237 | -1.70741 |
| Mir181c   | 0.387255 | 5.301049 | 2.383525 | 0.032514 | 0.198403 | -3.84764 |
| Dach1     | 0.387139 | 4.758348 | 3.653616 | 0.00277  | 0.061599 | -1.54794 |
| Ighd6-2   | 0.386912 | 3.781347 | 2.37156  | 0.033257 | 0.200371 | -3.86814 |
| Mir328    | 0.386895 | 4.10336  | 3.535187 | 0.003487 | 0.067609 | -1.76628 |
| Tpd52l1   | 0.386807 | 5.647179 | 4.099588 | 0.001172 | 0.041052 | -0.73141 |
| Ttc38     | 0.386664 | 6.603814 | 4.598217 | 0.000458 | 0.028131 | 0.161529 |
| Hes1      | 0.386631 | 6.95894  | 3.145967 | 0.007457 | 0.097572 | -2.48352 |
| Acaca     | 0.386549 | 5.066159 | 2.686295 | 0.018231 | 0.150104 | -3.31733 |
| Nek3      | 0.386549 | 4.476315 | 2.97389  | 0.010434 | 0.114162 | -2.79839 |
| Prrg4     | 0.386461 | 4.339389 | 2.900387 | 0.012039 | 0.121279 | -2.93204 |
| Btbd8     | 0.386366 | 3.884833 | 3.30315  | 0.005485 | 0.084015 | -2.19431 |
| Nxpe2     | 0.386214 | 3.92089  | 2.769042 | 0.015536 | 0.138681 | -3.16923 |
| Hoxa4     | 0.386    | 4.16354  | 3.302669 | 0.00549  | 0.084042 | -2.1952  |
| Mir128-1  | 0.385976 | 3.691849 | 3.546792 | 0.003409 | 0.067035 | -1.74487 |
| Zbtb39    | 0.385366 | 4.542455 | 3.443259 | 0.004172 | 0.07403  | -1.93589 |
| Atp8b1    | 0.385186 | 5.973192 | 2.531255 | 0.024554 | 0.173365 | -3.59144 |
| Naa38     | 0.385139 | 8.416039 | 3.537347 | 0.003473 | 0.067579 | -1.76229 |
| 1700095JO | 0.385076 | 3.54939  | 2.266144 | 0.040536 | 0.219643 | -4.04702 |
| Cox15     | 0.384983 | 8.049425 | 2.646394 | 0.019688 | 0.155717 | -3.38833 |
| Abcd3     | 0.384793 | 9.356459 | 3.059548 | 0.008828 | 0.106281 | -2.64195 |
| Igkv4-92  | 0.384783 | 4.006682 | 4.698037 | 0.000381 | 0.027042 | 0.33686  |
| Mir3962   | 0.384667 | 3.618929 | 2.852933 | 0.013203 | 0.127714 | -3.018   |
| Tmem178   | 0.384616 | 3.966071 | 4.51883  | 0.000531 | 0.030354 | 0.021203 |
| Ppapdc1b  | 0.384243 | 6.607812 | 3.666551 | 0.002701 | 0.061038 | -1.52411 |
| Sox18     | 0.384013 | 7.782827 | 3.584863 | 0.003166 | 0.065319 | -1.67466 |
| Rad9b     | 0.383735 | 4.972466 | 2.814911 | 0.014214 | 0.132996 | -3.08667 |

|           |          |          |          |          |          |          |
|-----------|----------|----------|----------|----------|----------|----------|
| Trim41    | 0.383274 | 5.145738 | 3.768798 | 0.002215 | 0.055293 | -1.33599 |
| Ndst2     | 0.382968 | 4.640866 | 3.414333 | 0.004414 | 0.076261 | -1.98926 |
| Clec4a3   | 0.382914 | 3.907603 | 3.795694 | 0.002103 | 0.054401 | -1.28658 |
| C630028M  | 0.382779 | 3.712955 | 4.022403 | 0.001359 | 0.043789 | -0.87179 |
| Gm10731   | 0.382646 | 3.532957 | 2.73434  | 0.016615 | 0.14331  | -3.23148 |
| Rnase1    | 0.382575 | 3.974898 | 2.345548 | 0.034928 | 0.204726 | -3.91258 |
| Slc35b3   | 0.382138 | 4.793771 | 2.973541 | 0.010441 | 0.114162 | -2.79902 |
| Acss3     | 0.382124 | 4.110333 | 2.715101 | 0.017245 | 0.146119 | -3.2659  |
| Scarb1    | 0.381721 | 7.011824 | 2.973242 | 0.010447 | 0.114162 | -2.79957 |
| Gm15413   | 0.3817   | 4.034763 | 2.407808 | 0.031054 | 0.195153 | -3.8059  |
| Mrpl10    | 0.381578 | 7.831577 | 3.786445 | 0.002141 | 0.054522 | -1.30357 |
| E330011O2 | 0.381293 | 4.107558 | 4.174393 | 0.001017 | 0.039184 | -0.59584 |
| Arhgap11a | 0.381175 | 3.872635 | 5.106697 | 0.000181 | 0.019303 | 1.040718 |
| Vmn1r9    | 0.380992 | 4.259181 | 2.470329 | 0.02758  | 0.183667 | -3.69775 |
| Oas2      | 0.380764 | 6.202426 | 2.282241 | 0.039334 | 0.216376 | -4.01992 |
| Sirt7     | 0.380666 | 4.878484 | 2.574935 | 0.022585 | 0.166205 | -3.51471 |
| Thoc5     | 0.380575 | 6.442891 | 2.265549 | 0.040581 | 0.219749 | -4.04802 |
| Aoc3      | 0.380439 | 5.753208 | 2.982025 | 0.01027  | 0.113179 | -2.78356 |
| Ppp1r18   | 0.379706 | 5.180901 | 2.98073  | 0.010296 | 0.113402 | -2.78592 |
| AU041133  | 0.379669 | 3.938777 | 2.989573 | 0.01012  | 0.112712 | -2.76979 |
| Sez6l2    | 0.379567 | 3.67131  | 4.185433 | 0.000996 | 0.038881 | -0.57587 |
| Nipsnap3b | 0.37914  | 4.24735  | 2.89238  | 0.012228 | 0.122088 | -2.94657 |
| Kif23     | 0.379127 | 3.518746 | 4.469227 | 0.000583 | 0.031294 | -0.06686 |
| Cav1      | 0.37911  | 9.787211 | 4.029365 | 0.001341 | 0.04352  | -0.85911 |
| Cdyl2     | 0.378445 | 5.066013 | 4.115634 | 0.001137 | 0.040407 | -0.70229 |
| Pcdhb20   | 0.378242 | 4.905104 | 4.696148 | 0.000382 | 0.027042 | 0.333554 |
| Pltp      | 0.378065 | 8.849514 | 2.288453 | 0.03888  | 0.214843 | -4.00944 |
| Fastkd1   | 0.377821 | 6.393012 | 2.859928 | 0.013025 | 0.126784 | -3.00535 |
| Zfp108    | 0.377716 | 4.335831 | 2.799449 | 0.014647 | 0.134615 | -3.11453 |
| Mir1951   | 0.377313 | 3.586361 | 2.815983 | 0.014185 | 0.13292  | -3.08473 |
| Cmb1      | 0.376702 | 6.051958 | 2.161543 | 0.049226 | 0.241323 | -4.22107 |
| Serinc5   | 0.376594 | 6.493961 | 4.569072 | 0.000484 | 0.029043 | 0.1101   |
| Slmo1     | 0.376577 | 3.854548 | 4.064721 | 0.001253 | 0.042022 | -0.79477 |
| 2610524HC | 0.375732 | 3.400431 | 3.271958 | 0.00583  | 0.086626 | -2.25178 |
| Gm5784    | 0.375726 | 4.063107 | 3.951093 | 0.001558 | 0.046903 | -1.0019  |
| Mipol1    | 0.375624 | 5.050117 | 3.390561 | 0.004624 | 0.077671 | -2.03312 |
| Pygo2     | 0.375465 | 4.024646 | 3.512372 | 0.003646 | 0.069031 | -1.80837 |
| Vps53     | 0.375427 | 6.805064 | 4.534611 | 0.000516 | 0.029955 | 0.049159 |
| Slc31a1   | 0.375285 | 6.536275 | 4.646083 | 0.000419 | 0.027213 | 0.245761 |
| Aspscr1   | 0.374417 | 6.970574 | 2.909255 | 0.011833 | 0.120438 | -2.91595 |
| Smarca1   | 0.374274 | 3.929243 | 2.589959 | 0.021943 | 0.163963 | -3.48822 |
| Bcas3     | 0.374234 | 7.393009 | 3.166883 | 0.007159 | 0.09532  | -2.44511 |
| Ptpn23    | 0.373901 | 5.575948 | 3.32689  | 0.005236 | 0.082546 | -2.15055 |
| Gm10130   | 0.373644 | 3.713596 | 2.274077 | 0.039939 | 0.218218 | -4.03367 |
| Smad7     | 0.373264 | 5.406684 | 3.653068 | 0.002773 | 0.061599 | -1.54895 |
| Mtmt14    | 0.373183 | 6.656969 | 3.128845 | 0.007711 | 0.098759 | -2.51495 |
| 2610002M  | 0.373159 | 4.893448 | 2.390271 | 0.032102 | 0.197255 | -3.83606 |
| Itfg2     | 0.372932 | 6.4031   | 3.307936 | 0.005434 | 0.083749 | -2.18549 |

|           |          |          |          |          |          |          |
|-----------|----------|----------|----------|----------|----------|----------|
| Bud13     | 0.372877 | 4.451901 | 3.512756 | 0.003643 | 0.069031 | -1.80766 |
| Tlx1      | 0.372864 | 3.981842 | 3.142438 | 0.007509 | 0.097732 | -2.49    |
| Atp1b2    | 0.37264  | 7.424601 | 3.011167 | 0.009702 | 0.110901 | -2.73039 |
| Pold3     | 0.372565 | 5.481042 | 3.193061 | 0.006802 | 0.093212 | -2.39699 |
| Ly6e      | 0.372491 | 10.70447 | 2.746495 | 0.016229 | 0.141663 | -3.20969 |
| Rnf208    | 0.372023 | 3.887997 | 3.20743  | 0.006613 | 0.091949 | -2.37057 |
| Gstt2     | 0.371969 | 4.818797 | 2.441309 | 0.029144 | 0.189265 | -3.74807 |
| Mavs      | 0.371847 | 9.172902 | 2.720079 | 0.01708  | 0.145261 | -3.257   |
| Ythdc2    | 0.371487 | 5.977898 | 3.942781 | 0.001583 | 0.04735  | -1.01709 |
| Cfl1      | 0.371484 | 3.599316 | 5.589944 | 7.74E-05 | 0.014851 | 1.841443 |
| Rasd1     | 0.371463 | 4.645042 | 2.427969 | 0.029891 | 0.191862 | -3.77114 |
| Hyal2     | 0.371338 | 6.28186  | 3.074656 | 0.008572 | 0.104714 | -2.61429 |
| Pfdn4     | 0.371297 | 5.151143 | 3.695651 | 0.002553 | 0.059142 | -1.47053 |
| Syn3      | 0.371046 | 4.365699 | 2.759161 | 0.015836 | 0.139922 | -3.18697 |
| Cxx1c     | 0.370924 | 6.043047 | 2.693954 | 0.017963 | 0.148725 | -3.30367 |
| Gm6124    | 0.370731 | 3.891827 | 2.534486 | 0.024403 | 0.17274  | -3.58578 |
| Alg6      | 0.37047  | 4.867527 | 3.136962 | 0.00759  | 0.09806  | -2.50005 |
| Dhx30     | 0.370456 | 5.206875 | 5.486607 | 9.26E-05 | 0.015238 | 1.673237 |
| Pcdhga12  | 0.370429 | 4.972161 | 2.407374 | 0.03108  | 0.195196 | -3.80665 |
| Cmip      | 0.370287 | 6.667077 | 3.425752 | 0.004317 | 0.075366 | -1.96819 |
| Gm1043    | 0.370216 | 4.218392 | 3.924835 | 0.001639 | 0.048299 | -1.0499  |
| Ppm1j     | 0.370138 | 5.593597 | 2.153101 | 0.049998 | 0.243536 | -4.23496 |
| Ogfr      | 0.369934 | 6.699615 | 4.015972 | 0.001376 | 0.043852 | -0.88351 |
| Vars2     | 0.36988  | 5.519901 | 2.884624 | 0.012414 | 0.123152 | -2.96063 |
| Gm7616    | 0.369843 | 3.950628 | 3.361217 | 0.004897 | 0.079707 | -2.08725 |
| Gcnt2     | 0.369839 | 6.033878 | 2.431715 | 0.029679 | 0.191194 | -3.76466 |
| Nbea      | 0.369805 | 6.347826 | 3.566506 | 0.003281 | 0.066241 | -1.70851 |
| Oas1b     | 0.369714 | 3.952354 | 3.311666 | 0.005394 | 0.08365  | -2.17861 |
| Osgepl1   | 0.369676 | 8.144474 | 3.803968 | 0.00207  | 0.053761 | -1.27139 |
| Arl16     | 0.369642 | 4.222907 | 5.864283 | 4.84E-05 | 0.012162 | 2.27981  |
| Dusp16    | 0.369642 | 6.978278 | 2.642651 | 0.01983  | 0.156366 | -3.39497 |
| Myof      | 0.369639 | 4.90357  | 2.743728 | 0.016316 | 0.142025 | -3.21465 |
| Ubox5     | 0.3695   | 5.043637 | 2.640942 | 0.019896 | 0.156619 | -3.398   |
| BC003331  | 0.369425 | 7.192525 | 2.937462 | 0.011201 | 0.118032 | -2.8647  |
| Gm1818    | 0.369276 | 9.418362 | 3.717005 | 0.002449 | 0.05782  | -1.43123 |
| Ell       | 0.369161 | 5.443207 | 2.496832 | 0.026222 | 0.179136 | -3.65161 |
| Mtrf1     | 0.36889  | 4.495968 | 4.782211 | 0.000326 | 0.025389 | 0.483712 |
| Tspan32   | 0.36889  | 3.768429 | 3.222812 | 0.006417 | 0.090568 | -2.34227 |
| Usp12     | 0.368632 | 5.263418 | 4.417889 | 0.000642 | 0.032715 | -0.1583  |
| Il17rd    | 0.368557 | 5.16491  | 3.741049 | 0.002338 | 0.056917 | -1.38701 |
| Fads1     | 0.368544 | 6.144558 | 3.957295 | 0.00154  | 0.046713 | -0.99057 |
| Yipf3     | 0.367933 | 7.178596 | 2.627212 | 0.020428 | 0.1588   | -3.42235 |
| Clic1     | 0.367852 | 6.159675 | 2.957169 | 0.010779 | 0.115806 | -2.82884 |
| Defa22    | 0.367845 | 3.744144 | 2.155834 | 0.049747 | 0.242729 | -4.23046 |
| Tmem8b    | 0.367761 | 4.764284 | 2.665516 | 0.018976 | 0.153364 | -3.35434 |
| Snx11     | 0.367723 | 4.633243 | 4.368688 | 0.000704 | 0.033174 | -0.24621 |
| Eif2ak1   | 0.367635 | 7.159241 | 4.160252 | 0.001044 | 0.039578 | -0.62143 |
| 6430573F1 | 0.367608 | 3.99785  | 4.192982 | 0.000981 | 0.038572 | -0.56223 |



|           |          |          |          |          |          |          |
|-----------|----------|----------|----------|----------|----------|----------|
| 4933431E2 | 0.367394 | 3.88967  | 2.553659 | 0.023524 | 0.170415 | -3.55214 |
| Gm20153   | 0.367276 | 3.43966  | 5.886553 | 4.66E-05 | 0.012162 | 2.31487  |
| Pgm3      | 0.367201 | 4.742845 | 2.636333 | 0.020073 | 0.157169 | -3.40618 |
| Mir5107   | 0.36711  | 4.445111 | 3.651369 | 0.002782 | 0.061747 | -1.55208 |
| Nubp1     | 0.367011 | 4.791416 | 4.07707  | 0.001224 | 0.04174  | -0.77232 |
| Stmn2     | 0.366835 | 5.655585 | 2.418346 | 0.030441 | 0.193269 | -3.78774 |
| Chd6      | 0.366523 | 7.482415 | 4.047629 | 0.001295 | 0.042778 | -0.82586 |
| Ctsl      | 0.366509 | 8.981432 | 3.112814 | 0.007956 | 0.10081  | -2.54436 |
| Cyb561a3  | 0.36613  | 5.937948 | 3.935627 | 0.001605 | 0.047684 | -1.03016 |
| Letm2     | 0.365879 | 6.642249 | 2.660261 | 0.019169 | 0.153873 | -3.36369 |
| Lrrc47    | 0.365845 | 5.789693 | 4.834417 | 0.000296 | 0.024633 | 0.574316 |
| Ighv2-6   | 0.365774 | 3.912053 | 4.326545 | 0.000762 | 0.034093 | -0.32172 |
| Fmr1      | 0.365696 | 6.329495 | 5.521784 | 8.71E-05 | 0.014927 | 1.730684 |
| Fmo5      | 0.365594 | 5.823747 | 3.169355 | 0.007124 | 0.09532  | -2.44057 |
| Olfr55    | 0.36556  | 3.552572 | 2.960648 | 0.010707 | 0.115473 | -2.82251 |
| Bora      | 0.365363 | 3.728417 | 4.31386  | 0.00078  | 0.03453  | -0.34448 |
| Spopl     | 0.365295 | 5.768422 | 3.576079 | 0.00322  | 0.06579  | -1.69085 |
| Magohb    | 0.364939 | 4.518651 | 2.25281  | 0.041557 | 0.222269 | -4.0694  |
| Gm561     | 0.364902 | 5.834469 | 2.874986 | 0.012649 | 0.124685 | -2.97809 |
| Ubash3b   | 0.364838 | 3.960007 | 4.921465 | 0.000253 | 0.023209 | 0.724562 |
| B4galt3   | 0.364834 | 6.314904 | 4.132159 | 0.001102 | 0.03993  | -0.67232 |
| G630090E1 | 0.364821 | 4.301144 | 2.592805 | 0.021824 | 0.163663 | -3.4832  |
| Eif3a     | 0.364448 | 9.946221 | 4.22014  | 0.000932 | 0.037622 | -0.51318 |
| Mir3061   | 0.364441 | 3.601573 | 3.420051 | 0.004365 | 0.075808 | -1.97871 |
| 1110012L1 | 0.36441  | 4.532466 | 2.334158 | 0.035684 | 0.206402 | -3.93198 |
| Rab32     | 0.364336 | 4.103148 | 3.363931 | 0.004871 | 0.079559 | -2.08224 |
| Zfp28     | 0.364268 | 4.453374 | 2.740058 | 0.016432 | 0.142576 | -3.22123 |
| Rpusd1    | 0.364173 | 4.670693 | 4.2454   | 0.000888 | 0.037186 | -0.46763 |
| Mir1a-2   | 0.36402  | 3.387658 | 2.493384 | 0.026395 | 0.179479 | -3.65762 |
| Xylt1     | 0.36378  | 4.34815  | 2.731915 | 0.016693 | 0.143696 | -3.23582 |
| Shmt1     | 0.363763 | 4.883053 | 2.342541 | 0.035126 | 0.205073 | -3.9177  |
| Gm15441   | 0.363491 | 4.775821 | 2.355486 | 0.03428  | 0.202761 | -3.89562 |
| Car2      | 0.36339  | 4.44439  | 3.879892 | 0.001787 | 0.050321 | -1.13216 |
| 4933407L2 | 0.363363 | 3.5448   | 3.399485 | 0.004544 | 0.077269 | -2.01666 |
| Rcor1     | 0.363247 | 6.821435 | 3.876299 | 0.0018   | 0.05036  | -1.13874 |
| Al837181  | 0.363227 | 7.336399 | 3.498488 | 0.003746 | 0.069861 | -1.83398 |
| Try10     | 0.363088 | 3.640935 | 2.341351 | 0.035205 | 0.205251 | -3.91973 |
| Fosl2     | 0.363071 | 6.940325 | 4.176195 | 0.001013 | 0.039168 | -0.59258 |
| Zfhx2     | 0.362942 | 4.892083 | 4.436303 | 0.00062  | 0.032056 | -0.12547 |
| Gstk1     | 0.362671 | 10.01402 | 3.336115 | 0.005143 | 0.081722 | -2.13354 |
| Tmub2     | 0.36261  | 5.493317 | 2.773512 | 0.015402 | 0.13813  | -3.16119 |
| Oxct1     | 0.362522 | 11.15685 | 4.481612 | 0.000569 | 0.031109 | -0.04484 |
| Atp2b4    | 0.362481 | 6.902595 | 4.504278 | 0.000546 | 0.030412 | -0.0046  |
| Gsdmc2    | 0.362281 | 3.279285 | 4.121285 | 0.001125 | 0.040206 | -0.69204 |
| Eln       | 0.362142 | 6.087972 | 2.624789 | 0.020523 | 0.159044 | -3.42664 |
| 2700060E0 | 0.362027 | 9.077498 | 3.054651 | 0.008913 | 0.106777 | -2.65091 |
| Gm38426   | 0.361894 | 3.673379 | 2.924393 | 0.01149  | 0.119614 | -2.88846 |
| Cd80      | 0.361159 | 4.182126 | 3.659102 | 0.00274  | 0.061504 | -1.53783 |

|           |          |          |          |          |          |          |
|-----------|----------|----------|----------|----------|----------|----------|
| Slc16a12  | 0.36085  | 4.19312  | 2.885514 | 0.012393 | 0.123037 | -2.95902 |
| Sdccag8   | 0.360494 | 5.426992 | 2.218058 | 0.044334 | 0.229137 | -4.12748 |
| Tnpo2     | 0.360406 | 6.35045  | 3.260443 | 0.005962 | 0.087566 | -2.27299 |
| A630072M  | 0.360379 | 4.272149 | 3.487689 | 0.003826 | 0.070677 | -1.85391 |
| Ptprc     | 0.360158 | 4.496974 | 3.981698 | 0.001469 | 0.045378 | -0.94602 |
| Itgb1bp1  | 0.359992 | 6.085432 | 3.215099 | 0.006515 | 0.091193 | -2.35646 |
| Odf2      | 0.359517 | 5.279856 | 3.067006 | 0.008701 | 0.105593 | -2.6283  |
| Nudt1     | 0.359497 | 4.048971 | 4.178992 | 0.001008 | 0.039146 | -0.58752 |
| Cbr4      | 0.359226 | 7.079841 | 3.525215 | 0.003556 | 0.068153 | -1.78467 |
| Rp9       | 0.359036 | 8.024896 | 5.291203 | 0.00013  | 0.017404 | 1.35064  |
| Cnot6     | 0.358704 | 6.215322 | 3.332316 | 0.005181 | 0.081936 | -2.14055 |
| Gpatch2   | 0.358402 | 4.084963 | 5.459158 | 9.71E-05 | 0.015433 | 1.628277 |
| Hlcs      | 0.358358 | 4.662577 | 3.092117 | 0.008284 | 0.103104 | -2.5823  |
| Zer1      | 0.358276 | 5.686137 | 4.34098  | 0.000741 | 0.033882 | -0.29583 |
| Lrrc8c    | 0.358181 | 9.049208 | 3.246176 | 0.006131 | 0.088386 | -2.29926 |
| Mir3080   | 0.3581   | 3.800795 | 3.002868 | 0.009861 | 0.111173 | -2.74554 |
| Zfp446    | 0.357985 | 4.704546 | 2.60803  | 0.021195 | 0.161779 | -3.4563  |
| 4833427F1 | 0.357859 | 4.484431 | 3.752095 | 0.002288 | 0.056417 | -1.3667  |
| Cpm       | 0.357734 | 5.041985 | 2.320311 | 0.036625 | 0.209012 | -3.95551 |
| Ackr2     | 0.357137 | 5.338236 | 2.442679 | 0.029068 | 0.189011 | -3.7457  |
| Rab26os   | 0.35692  | 4.34594  | 2.267573 | 0.040428 | 0.219295 | -4.04461 |
| Sox6os    | 0.35692  | 4.785719 | 3.216591 | 0.006496 | 0.091046 | -2.35371 |
| Gm14167   | 0.356818 | 4.160506 | 4.675465 | 0.000397 | 0.027132 | 0.297323 |
| Poc1a     | 0.356615 | 4.917891 | 5.629121 | 7.23E-05 | 0.014445 | 1.904776 |
| Parp11    | 0.356561 | 4.850318 | 3.051739 | 0.008964 | 0.106878 | -2.65623 |
| LOC102640 | 0.3563   | 4.194507 | 3.321494 | 0.005292 | 0.083    | -2.1605  |
| Snord45b  | 0.356232 | 3.939428 | 2.604062 | 0.021357 | 0.16212  | -3.46332 |
| Krba1     | 0.356194 | 5.200558 | 2.257783 | 0.041173 | 0.221398 | -4.06106 |
| Mir5100   | 0.355984 | 4.146172 | 2.529276 | 0.024647 | 0.173775 | -3.59491 |
| Vmn1r44   | 0.35596  | 3.635256 | 3.353779 | 0.004968 | 0.080256 | -2.10097 |
| Flnb      | 0.355896 | 6.8744   | 3.397396 | 0.004563 | 0.077338 | -2.02051 |
| Bcar3     | 0.355849 | 5.055203 | 3.071891 | 0.008618 | 0.104858 | -2.61935 |
| Tmem38a   | 0.355564 | 10.01307 | 3.686128 | 0.0026   | 0.059838 | -1.48806 |
| Nlgn3     | 0.355262 | 4.016335 | 2.814085 | 0.014237 | 0.133007 | -3.08815 |
| Slc7a5    | 0.355157 | 4.701016 | 2.381612 | 0.032631 | 0.198536 | -3.85092 |
| Men1      | 0.355116 | 6.232571 | 2.442568 | 0.029074 | 0.189011 | -3.74589 |
| Ckm       | 0.354777 | 10.84633 | 3.562238 | 0.003308 | 0.0664   | -1.71638 |
| Gm38483   | 0.354713 | 3.728219 | 4.388384 | 0.000678 | 0.033    | -0.21098 |
| Nav3      | 0.354662 | 5.131595 | 2.455984 | 0.028342 | 0.186696 | -3.72265 |
| Lpcat4    | 0.354618 | 4.43089  | 2.893876 | 0.012193 | 0.121839 | -2.94386 |
| Nedd4l    | 0.354526 | 7.377133 | 3.006294 | 0.009795 | 0.11129  | -2.73928 |
| LOC101055 | 0.354445 | 3.57509  | 2.555761 | 0.02343  | 0.170063 | -3.54844 |
| Gm17769   | 0.354435 | 4.444795 | 3.172508 | 0.00708  | 0.095093 | -2.43477 |
| Mir3092   | 0.354072 | 4.170444 | 2.750798 | 0.016095 | 0.140934 | -3.20198 |
| Mir3961   | 0.353926 | 3.953167 | 3.436217 | 0.00423  | 0.074575 | -1.94889 |
| Mir709    | 0.353838 | 3.683673 | 2.713257 | 0.017306 | 0.146487 | -3.2692  |
| Tspan7    | 0.353773 | 9.327928 | 4.819826 | 0.000305 | 0.024766 | 0.549031 |
| Rpl21     | 0.353366 | 4.791918 | 2.485186 | 0.02681  | 0.181067 | -3.67191 |

|           |          |          |          |          |          |          |
|-----------|----------|----------|----------|----------|----------|----------|
| Slc45a4   | 0.353085 | 4.616484 | 2.41537  | 0.030613 | 0.193859 | -3.79288 |
| Tcf21     | 0.352987 | 4.856832 | 2.563273 | 0.023095 | 0.168419 | -3.53524 |
| Ankrd52   | 0.352722 | 7.48349  | 3.549122 | 0.003394 | 0.066964 | -1.74057 |
| Auts2     | 0.352675 | 6.040921 | 3.383932 | 0.004684 | 0.077965 | -2.04535 |
| Slc7a4    | 0.352637 | 3.720264 | 3.163075 | 0.007212 | 0.09563  | -2.4521  |
| Gm7854    | 0.352539 | 3.851807 | 3.257875 | 0.005992 | 0.087839 | -2.27772 |
| Senp1     | 0.352532 | 5.982744 | 2.857762 | 0.01308  | 0.126966 | -3.00927 |
| Ly6c1     | 0.352498 | 5.97345  | 2.453926 | 0.028453 | 0.186834 | -3.72622 |
| Stk3      | 0.352336 | 6.327209 | 3.247973 | 0.006109 | 0.088386 | -2.29596 |
| Gpam      | 0.352119 | 10.47163 | 2.309105 | 0.037404 | 0.211235 | -3.97451 |
| Appl1     | 0.351963 | 6.758013 | 5.932816 | 4.32E-05 | 0.012162 | 2.387444 |
| Gm10658   | 0.351939 | 3.683863 | 3.880875 | 0.001784 | 0.050283 | -1.13036 |
| Gm7168    | 0.351902 | 3.263353 | 4.829333 | 0.000299 | 0.024635 | 0.565509 |
| Sele      | 0.351902 | 3.937995 | 3.397589 | 0.004561 | 0.077338 | -2.02016 |
| Gm15533   | 0.351725 | 3.453369 | 4.044762 | 0.001302 | 0.042778 | -0.83108 |
| Cdc42se2  | 0.351603 | 6.442566 | 2.89856  | 0.012082 | 0.121409 | -2.93536 |
| Cers3     | 0.351437 | 3.86509  | 5.019419 | 0.000212 | 0.020747 | 0.892365 |
| Aifm1     | 0.351142 | 9.327264 | 5.426057 | 0.000103 | 0.015682 | 1.573903 |
| Pvrl3     | 0.351128 | 4.920356 | 3.423654 | 0.004335 | 0.075607 | -1.97207 |
| Pcyt2     | 0.350993 | 7.004272 | 2.745165 | 0.016271 | 0.141878 | -3.21208 |
| Pde11a    | 0.350901 | 4.566564 | 2.85315  | 0.013197 | 0.12771  | -3.01761 |
| Ushbp1    | 0.350505 | 6.142049 | 3.919061 | 0.001657 | 0.048406 | -1.06046 |
| Tbc1d9b   | 0.350396 | 7.841539 | 2.919123 | 0.011608 | 0.11989  | -2.89803 |
| Wdr55     | 0.350199 | 6.019338 | 2.876783 | 0.012605 | 0.124572 | -2.97484 |
| Higd1b    | 0.349786 | 4.70777  | 4.470781 | 0.000581 | 0.031294 | -0.06409 |
| Tst       | 0.349657 | 5.637556 | 3.686653 | 0.002598 | 0.059838 | -1.48709 |
| Nrg1      | 0.349633 | 4.086763 | 2.823748 | 0.013973 | 0.131867 | -3.07073 |
| Zkscan5   | 0.34944  | 5.095618 | 2.418918 | 0.030408 | 0.193269 | -3.78676 |
| Slc25a30  | 0.349419 | 5.290107 | 3.733291 | 0.002373 | 0.057429 | -1.40127 |
| Timm17b   | 0.349386 | 7.490774 | 2.629607 | 0.020334 | 0.158367 | -3.41811 |
| Abtb1     | 0.349311 | 5.678073 | 3.029722 | 0.009357 | 0.108872 | -2.69649 |
| Gm14321   | 0.349274 | 4.07755  | 3.431372 | 0.00427  | 0.07495  | -1.95783 |
| Gm5785    | 0.34927  | 4.925774 | 2.168149 | 0.048629 | 0.239939 | -4.21019 |
| Ptges     | 0.348904 | 4.120009 | 3.346566 | 0.005039 | 0.080817 | -2.11427 |
| Slc22a5   | 0.348477 | 5.9703   | 2.987128 | 0.010168 | 0.112746 | -2.77425 |
| Ufsp1     | 0.348406 | 5.004606 | 3.079252 | 0.008495 | 0.104434 | -2.60587 |
| Bcs1l     | 0.348355 | 7.045597 | 2.597851 | 0.021614 | 0.162921 | -3.47429 |
| Gpr137b   | 0.348219 | 4.306108 | 3.246384 | 0.006128 | 0.088386 | -2.29888 |
| Pzp       | 0.348043 | 3.716176 | 4.553053 | 0.000498 | 0.029355 | 0.08179  |
| Serpina1b | 0.347989 | 3.564212 | 2.721586 | 0.01703  | 0.145017 | -3.2543  |
| Vmn1r238  | 0.347882 | 3.362824 | 3.878482 | 0.001792 | 0.050344 | -1.13474 |
| Exosc1    | 0.347758 | 8.017466 | 3.145043 | 0.007471 | 0.097594 | -2.48522 |
| Mrps9     | 0.347724 | 7.660353 | 4.319193 | 0.000773 | 0.03436  | -0.33491 |
| Mhrt      | 0.347588 | 10.92933 | 3.472483 | 0.003941 | 0.071617 | -1.88197 |
| Vkorc1l1  | 0.347582 | 4.779748 | 3.133833 | 0.007636 | 0.098235 | -2.5058  |
| Traj28    | 0.347283 | 4.409156 | 2.84014  | 0.013535 | 0.129716 | -3.04113 |
| Gm16348   | 0.346561 | 4.017926 | 2.230709 | 0.043304 | 0.227419 | -4.10638 |
| Sdr42e1   | 0.346205 | 3.795661 | 2.344947 | 0.034967 | 0.204726 | -3.9136  |

|           |          |          |          |          |          |          |
|-----------|----------|----------|----------|----------|----------|----------|
| Slc25a20  | 0.346191 | 10.42603 | 2.777293 | 0.01529  | 0.137678 | -3.1544  |
| Vamp1     | 0.346107 | 4.918659 | 2.227297 | 0.043579 | 0.227889 | -4.11208 |
| Galns     | 0.346029 | 4.564616 | 2.752363 | 0.016046 | 0.140682 | -3.19917 |
| Car4      | 0.34592  | 7.562446 | 3.305914 | 0.005455 | 0.083865 | -2.18922 |
| Gba2      | 0.345852 | 6.10473  | 2.510504 | 0.025547 | 0.176687 | -3.62774 |
| Mphosph8  | 0.345751 | 6.595076 | 5.802874 | 5.37E-05 | 0.012606 | 2.182727 |
| As3mt     | 0.345398 | 7.902842 | 3.330569 | 0.005199 | 0.082163 | -2.14377 |
| H2-DMb2   | 0.345323 | 3.672743 | 4.377582 | 0.000692 | 0.033048 | -0.2303  |
| Hrsp12    | 0.34531  | 5.529588 | 2.161003 | 0.049275 | 0.241398 | -4.22196 |
| Gdi2      | 0.345256 | 10.04926 | 2.356691 | 0.034202 | 0.202542 | -3.89357 |
| Hinfp     | 0.345181 | 4.579492 | 3.6559   | 0.002757 | 0.061591 | -1.54373 |
| Nmi       | 0.344991 | 4.907684 | 3.895248 | 0.001735 | 0.049702 | -1.10404 |
| Gm13264   | 0.344971 | 3.746379 | 3.320305 | 0.005304 | 0.083    | -2.16269 |
| Mir126a   | 0.344957 | 3.649367 | 3.832486 | 0.001959 | 0.052101 | -1.21906 |
| Nudt16l1  | 0.344923 | 5.287533 | 3.724237 | 0.002415 | 0.057456 | -1.41793 |
| Fmn11     | 0.344869 | 5.333405 | 2.694523 | 0.017944 | 0.148725 | -3.30266 |
| Tbca      | 0.344604 | 5.018982 | 2.945835 | 0.01102  | 0.116926 | -2.84947 |
| Phkb      | 0.344584 | 8.075124 | 3.394849 | 0.004585 | 0.077427 | -2.02521 |
| Fam206a   | 0.34455  | 4.458245 | 3.54341  | 0.003432 | 0.067233 | -1.75111 |
| Adra1d    | 0.344499 | 4.285856 | 4.673283 | 0.000399 | 0.027132 | 0.293498 |
| Osbpl6    | 0.344489 | 6.136275 | 2.774536 | 0.015372 | 0.138056 | -3.15935 |
| Gemin5    | 0.344408 | 5.560713 | 2.186964 | 0.046966 | 0.236017 | -4.17911 |
| Pa2g4     | 0.344333 | 8.876919 | 2.440628 | 0.029181 | 0.189411 | -3.74925 |
| Ppp1r3d   | 0.344191 | 5.369524 | 3.181135 | 0.006962 | 0.094216 | -2.41892 |
| Slc16a14  | 0.343597 | 3.974533 | 3.806308 | 0.00206  | 0.053574 | -1.2671  |
| Btf3      | 0.343302 | 5.016378 | 2.498444 | 0.026141 | 0.178931 | -3.6488  |
| Pex10     | 0.342909 | 6.733141 | 3.618303 | 0.002967 | 0.062847 | -1.61301 |
| Tceb3     | 0.342896 | 6.978902 | 3.148581 | 0.007419 | 0.097228 | -2.47872 |
| Vmn2r78   | 0.342818 | 3.075299 | 3.058615 | 0.008844 | 0.106372 | -2.64365 |
| Pus7l     | 0.342539 | 4.024704 | 2.3605   | 0.033958 | 0.202007 | -3.88706 |
| Ifit2     | 0.342434 | 4.231276 | 3.293066 | 0.005594 | 0.085006 | -2.21289 |
| Cd46      | 0.342048 | 5.148075 | 2.708905 | 0.017452 | 0.147072 | -3.27698 |
| Abhd10    | 0.342004 | 4.804303 | 3.741514 | 0.002335 | 0.056917 | -1.38615 |
| Ccdc60    | 0.34198  | 3.80364  | 5.150093 | 0.000168 | 0.018681 | 1.114068 |
| Tcea2     | 0.341797 | 4.303223 | 3.224346 | 0.006398 | 0.090529 | -2.33944 |
| Lmcd1     | 0.341749 | 7.739885 | 2.453447 | 0.028479 | 0.186905 | -3.72705 |
| Pou5f2    | 0.3414   | 4.507126 | 2.909575 | 0.011826 | 0.120438 | -2.91537 |
| Lap3      | 0.341295 | 8.668369 | 3.773653 | 0.002195 | 0.054941 | -1.32707 |
| Gmeb2     | 0.341268 | 6.356669 | 2.450812 | 0.028622 | 0.187299 | -3.73162 |
| Trim23    | 0.340793 | 6.48371  | 2.489357 | 0.026598 | 0.18032  | -3.66464 |
| C1qtnf3   | 0.340668 | 3.48202  | 3.294459 | 0.005579 | 0.084885 | -2.21033 |
| Serhl     | 0.340366 | 5.79974  | 2.185941 | 0.047055 | 0.236321 | -4.1808  |
| Phkg2     | 0.340088 | 6.610474 | 2.423264 | 0.030158 | 0.192438 | -3.77926 |
| Nol10     | 0.340037 | 4.948339 | 3.19444  | 0.006783 | 0.093116 | -2.39446 |
| 1700030FO | 0.339915 | 3.850947 | 3.37713  | 0.004747 | 0.078462 | -2.0579  |
| Fitm1     | 0.33983  | 10.61197 | 2.741819 | 0.016377 | 0.142333 | -3.21808 |
| Smim8     | 0.339783 | 8.149709 | 4.18419  | 0.000998 | 0.038881 | -0.57812 |
| Yae1d1    | 0.339749 | 6.491001 | 3.98319  | 0.001465 | 0.045319 | -0.94329 |

|           |          |          |          |          |          |          |
|-----------|----------|----------|----------|----------|----------|----------|
| Slc43a2   | 0.339661 | 5.683665 | 2.185567 | 0.047088 | 0.236365 | -4.18142 |
| Nnmt      | 0.339525 | 3.809818 | 3.676673 | 0.002648 | 0.060349 | -1.50547 |
| LOC102634 | 0.339413 | 3.543323 | 3.813194 | 0.002033 | 0.053367 | -1.25446 |
| Prr13     | 0.339349 | 5.561927 | 2.614615 | 0.020929 | 0.160632 | -3.44465 |
| Rsg1      | 0.339186 | 4.053626 | 3.971027 | 0.0015   | 0.045975 | -0.96549 |
| Ift88     | 0.339152 | 4.920715 | 2.164904 | 0.048921 | 0.240399 | -4.21554 |
| Pcdhb18   | 0.339094 | 3.810986 | 4.795071 | 0.000319 | 0.025191 | 0.506063 |
| Ephb4     | 0.338962 | 7.058478 | 4.560243 | 0.000492 | 0.029103 | 0.0945   |
| Mir1949   | 0.338949 | 3.844035 | 2.861073 | 0.012996 | 0.126647 | -3.00328 |
| Igf2bp2   | 0.338898 | 4.589696 | 2.620718 | 0.020685 | 0.159767 | -3.43385 |
| Rpl30     | 0.338833 | 3.613671 | 2.425929 | 0.030006 | 0.192176 | -3.77466 |
| Traf3ip1  | 0.338752 | 4.66726  | 3.712453 | 0.002471 | 0.057893 | -1.43961 |
| Tmtc2     | 0.338677 | 4.928616 | 3.305691 | 0.005458 | 0.083865 | -2.18963 |
| AA415398  | 0.338586 | 4.784364 | 3.231516 | 0.006309 | 0.089626 | -2.32625 |
| Preb      | 0.338521 | 7.622223 | 2.964593 | 0.010625 | 0.114837 | -2.81532 |
| Art5      | 0.33822  | 4.655763 | 2.196155 | 0.046173 | 0.234107 | -4.16388 |
| Fance     | 0.338216 | 4.879069 | 3.377448 | 0.004744 | 0.078462 | -2.05731 |
| Cog4      | 0.338128 | 8.155718 | 3.634843 | 0.002873 | 0.062351 | -1.58253 |
| Prmt10    | 0.338121 | 4.783969 | 2.565586 | 0.022993 | 0.167873 | -3.53117 |
| Pdlim4    | 0.338067 | 4.634691 | 2.705538 | 0.017566 | 0.147342 | -3.28299 |
| Tas2r135  | 0.337874 | 3.768383 | 3.563154 | 0.003303 | 0.066371 | -1.71469 |
| Lrrc42    | 0.337538 | 4.272122 | 2.910622 | 0.011802 | 0.120438 | -2.91347 |
| Cklf      | 0.337504 | 3.902069 | 2.921875 | 0.011546 | 0.119801 | -2.89303 |
| Pbp2      | 0.33726  | 3.655609 | 2.723243 | 0.016975 | 0.144917 | -3.25134 |
| Tmem138   | 0.337219 | 4.210602 | 2.508542 | 0.025643 | 0.176832 | -3.63117 |
| Itga6     | 0.337002 | 6.64425  | 3.024742 | 0.009449 | 0.109319 | -2.70559 |
| Dennd6b   | 0.336962 | 5.960961 | 2.363646 | 0.033757 | 0.201694 | -3.88168 |
| Klk8      | 0.336921 | 4.158613 | 3.722499 | 0.002423 | 0.057456 | -1.42113 |
| Gm13154   | 0.336882 | 3.238102 | 2.967673 | 0.010561 | 0.114616 | -2.80971 |
| Bche      | 0.336812 | 6.118113 | 3.223622 | 0.006407 | 0.090568 | -2.34078 |
| P2ry2     | 0.336792 | 8.161072 | 2.386166 | 0.032352 | 0.197804 | -3.84311 |
| Nudt7     | 0.33667  | 8.032104 | 3.136723 | 0.007593 | 0.09806  | -2.50049 |
| Spata33   | 0.336507 | 5.271606 | 2.552947 | 0.023556 | 0.170415 | -3.55339 |
| Nat14     | 0.336256 | 4.007728 | 2.756444 | 0.01592  | 0.140291 | -3.19185 |
| 9230110C1 | 0.335775 | 3.630941 | 3.325613 | 0.005249 | 0.082595 | -2.1529  |
| Gm31094   | 0.335744 | 3.111638 | 2.599691 | 0.021537 | 0.162659 | -3.47104 |
| Lemd3     | 0.334947 | 6.158847 | 2.339055 | 0.035357 | 0.205562 | -3.92364 |
| Nfatc1    | 0.334873 | 6.765744 | 4.461118 | 0.000592 | 0.031294 | -0.08128 |
| B330016D1 | 0.334856 | 4.639921 | 2.263848 | 0.04071  | 0.220202 | -4.05088 |
| Cd93      | 0.334846 | 7.807397 | 3.038504 | 0.009198 | 0.108254 | -2.68044 |
| Ulk3      | 0.334588 | 4.981422 | 4.376685 | 0.000693 | 0.033048 | -0.2319  |
| Gm10804   | 0.334539 | 3.419223 | 3.782565 | 0.002157 | 0.054662 | -1.3107  |
| Tbc1d4    | 0.334384 | 7.969438 | 3.254769 | 0.006029 | 0.087954 | -2.28344 |
| Apeh      | 0.334235 | 5.764611 | 2.777524 | 0.015283 | 0.137678 | -3.15398 |
| Tceb2     | 0.334093 | 9.794976 | 2.391998 | 0.031997 | 0.197039 | -3.83309 |
| Sdhaf3    | 0.334093 | 5.899143 | 2.228634 | 0.043471 | 0.227717 | -4.10985 |
| Gngt2     | 0.333683 | 4.324882 | 2.764525 | 0.015673 | 0.139001 | -3.17734 |
| Ccdc68    | 0.333632 | 4.137845 | 5.419355 | 0.000104 | 0.015682 | 1.562873 |

|           |          |          |          |          |          |          |
|-----------|----------|----------|----------|----------|----------|----------|
| Olf1099   | 0.333562 | 3.390333 | 2.238995 | 0.042641 | 0.225838 | -4.09254 |
| Neur13    | 0.333204 | 5.744564 | 2.579628 | 0.022383 | 0.165796 | -3.50644 |
| Trib2     | 0.33315  | 6.912669 | 2.987136 | 0.010168 | 0.112746 | -2.77424 |
| Gm4787    | 0.333101 | 3.583299 | 2.642157 | 0.019849 | 0.156402 | -3.39585 |
| Med28     | 0.332831 | 5.710361 | 2.342436 | 0.035133 | 0.205073 | -3.91788 |
| Bcat2     | 0.332825 | 7.509186 | 3.089601 | 0.008325 | 0.103317 | -2.58691 |
| Noc3l     | 0.332655 | 5.495592 | 2.777079 | 0.015296 | 0.137678 | -3.15478 |
| Pkdrej    | 0.332608 | 4.494754 | 2.26617  | 0.040534 | 0.219643 | -4.04697 |
| Gm13084   | 0.332548 | 3.381199 | 2.53626  | 0.02432  | 0.17274  | -3.58267 |
| Glod4     | 0.332404 | 6.78225  | 3.256962 | 0.006003 | 0.087839 | -2.2794  |
| Eml3      | 0.332289 | 5.088996 | 2.579709 | 0.022379 | 0.165796 | -3.5063  |
| Lpin3     | 0.332231 | 4.286314 | 2.259162 | 0.041068 | 0.22123  | -4.05874 |
| Cox4i2    | 0.332106 | 5.668169 | 2.91908  | 0.011609 | 0.11989  | -2.89811 |
| Ret       | 0.332052 | 4.901377 | 2.379461 | 0.032764 | 0.198877 | -3.8546  |
| Snord19   | 0.331648 | 3.41615  | 4.87349  | 0.000276 | 0.023667 | 0.641887 |
| 1110059G1 | 0.331597 | 4.997504 | 3.707637 | 0.002494 | 0.058217 | -1.44847 |
| Cdipt     | 0.331577 | 7.955828 | 2.692798 | 0.018003 | 0.14894  | -3.30573 |
| 1700022N2 | 0.331506 | 3.58714  | 4.166757 | 0.001032 | 0.039457 | -0.60966 |
| Mpg       | 0.331445 | 4.362825 | 3.852696 | 0.001884 | 0.051557 | -1.18199 |
| Dock4     | 0.331387 | 6.015791 | 4.375042 | 0.000695 | 0.033055 | -0.23484 |
| Gpd1l     | 0.331285 | 7.369419 | 2.413768 | 0.030706 | 0.194237 | -3.79564 |
| Inhba     | 0.331234 | 3.853361 | 4.073194 | 0.001233 | 0.041863 | -0.77936 |
| Nxpe4     | 0.331197 | 5.570384 | 2.644474 | 0.019761 | 0.156003 | -3.39173 |
| Pknnox1   | 0.331024 | 4.636052 | 3.052733 | 0.008946 | 0.106876 | -2.65442 |
| Spg20     | 0.330831 | 7.582245 | 3.284723 | 0.005686 | 0.085618 | -2.22827 |
| Tbc1d8    | 0.330756 | 4.92612  | 2.859271 | 0.013041 | 0.126825 | -3.00654 |
| Isca2     | 0.33075  | 8.359385 | 2.909593 | 0.011826 | 0.120438 | -2.91534 |
| Rbm12b2   | 0.330729 | 6.002767 | 2.807253 | 0.014427 | 0.13377  | -3.10047 |
| 4930515G1 | 0.330617 | 4.157333 | 2.699849 | 0.01776  | 0.147997 | -3.29315 |
| Gm10033   | 0.330522 | 4.238259 | 2.717007 | 0.017181 | 0.145826 | -3.26249 |
| Sptan1    | 0.330499 | 9.239143 | 3.72999  | 0.002388 | 0.057456 | -1.40734 |
| Adgrg6    | 0.330451 | 4.084171 | 2.392839 | 0.031946 | 0.197039 | -3.83165 |
| Tbc1d19   | 0.330336 | 7.256314 | 2.770999 | 0.015477 | 0.138505 | -3.16571 |
| Tll2      | 0.330282 | 4.035746 | 2.345165 | 0.034953 | 0.204726 | -3.91323 |
| Poli      | 0.330244 | 3.843426 | 3.441823 | 0.004184 | 0.074182 | -1.93854 |
| Kri1      | 0.32997  | 4.681261 | 2.891907 | 0.01224  | 0.122094 | -2.94743 |
| Aldh9a1   | 0.329868 | 7.910702 | 2.379024 | 0.032791 | 0.198877 | -3.85535 |
| Abca3     | 0.329278 | 5.118741 | 3.089392 | 0.008329 | 0.103317 | -2.5873  |
| Mnd1      | 0.32918  | 3.423053 | 2.561173 | 0.023188 | 0.168786 | -3.53893 |
| Hsd3b7    | 0.328979 | 5.402771 | 2.942469 | 0.011092 | 0.117494 | -2.85559 |
| Syde1     | 0.328824 | 5.792504 | 2.966916 | 0.010577 | 0.114668 | -2.81109 |
| Ccdc159   | 0.328661 | 4.981388 | 2.663304 | 0.019057 | 0.153648 | -3.35827 |
| Pwp2      | 0.328474 | 4.521659 | 3.506357 | 0.003689 | 0.069422 | -1.81947 |
| Mrpl28    | 0.328322 | 5.42295  | 2.232034 | 0.043197 | 0.227136 | -4.10417 |
| Tceanc2   | 0.328166 | 4.672384 | 2.605269 | 0.021308 | 0.162042 | -3.46119 |
| Map6d1    | 0.327928 | 3.723209 | 3.586528 | 0.003156 | 0.065281 | -1.67159 |
| S100a10   | 0.327799 | 8.600749 | 3.217556 | 0.006484 | 0.091013 | -2.35194 |
| Irf6      | 0.327745 | 3.819065 | 3.405393 | 0.004492 | 0.076856 | -2.00576 |

|           |          |          |          |          |          |          |
|-----------|----------|----------|----------|----------|----------|----------|
| Ykt6      | 0.327718 | 5.970011 | 3.035349 | 0.009255 | 0.108326 | -2.68621 |
| D430042O  | 0.327488 | 4.992194 | 4.651893 | 0.000415 | 0.027213 | 0.255965 |
| Tubgcp2   | 0.32706  | 6.511024 | 2.51244  | 0.025453 | 0.176353 | -3.62436 |
| A4galt    | 0.327026 | 5.072856 | 3.323742 | 0.005269 | 0.082741 | -2.15635 |
| Ccl4      | 0.326969 | 4.398348 | 3.682154 | 0.00262  | 0.060079 | -1.49538 |
| Clybl     | 0.326769 | 9.680637 | 4.652573 | 0.000414 | 0.027213 | 0.25716  |
| Gm3740    | 0.326667 | 3.523034 | 4.978612 | 0.000228 | 0.021561 | 0.822625 |
| Srpx      | 0.326636 | 4.298491 | 3.149049 | 0.007412 | 0.097228 | -2.47787 |
| Ogfod1    | 0.326613 | 7.510312 | 3.24837  | 0.006105 | 0.088386 | -2.29522 |
| Adh5      | 0.326348 | 8.577888 | 3.543566 | 0.003431 | 0.067233 | -1.75082 |
| Ednrb     | 0.326321 | 7.477451 | 2.959084 | 0.010739 | 0.115604 | -2.82535 |
| Psmc2     | 0.326294 | 8.715556 | 2.925497 | 0.011465 | 0.119407 | -2.88645 |
| Apip      | 0.325962 | 7.583228 | 3.81927  | 0.002009 | 0.052913 | -1.24331 |
| 5031426D1 | 0.325385 | 5.910739 | 2.635162 | 0.020118 | 0.157473 | -3.40826 |
| Epdr1     | 0.325378 | 6.318614 | 3.001636 | 0.009884 | 0.111846 | -2.74778 |
| Tsen2     | 0.325277 | 4.498413 | 2.831215 | 0.013772 | 0.131074 | -3.05725 |
| Pm20d1    | 0.325175 | 5.172028 | 2.394483 | 0.031847 | 0.1968   | -3.82882 |
| Vgll4     | 0.325053 | 4.918549 | 3.777396 | 0.002179 | 0.054728 | -1.32019 |
| Chd3      | 0.324782 | 5.10396  | 3.012169 | 0.009683 | 0.110879 | -2.72856 |
| Rab42     | 0.324775 | 3.694044 | 4.666339 | 0.000404 | 0.027213 | 0.28132  |
| Adck2     | 0.324751 | 4.502545 | 3.495947 | 0.003765 | 0.070031 | -1.83867 |
| Zswim4    | 0.324666 | 6.051982 | 3.254483 | 0.006032 | 0.087954 | -2.28397 |
| Halr1     | 0.324632 | 3.737186 | 3.840507 | 0.001928 | 0.051921 | -1.20434 |
| Gm13286   | 0.324531 | 5.53401  | 2.671655 | 0.018753 | 0.15255  | -3.34341 |
| L3mbtl3   | 0.324514 | 4.920558 | 2.906849 | 0.011889 | 0.120686 | -2.92032 |
| Slc25a37  | 0.324307 | 6.486209 | 2.224468 | 0.043809 | 0.228227 | -4.1168  |
| Syngap1   | 0.324127 | 4.734655 | 3.140662 | 0.007535 | 0.097851 | -2.49326 |
| Retnla    | 0.324049 | 3.486487 | 2.368347 | 0.033459 | 0.200818 | -3.87364 |
| Tmem62    | 0.324025 | 4.48379  | 2.869269 | 0.01279  | 0.125432 | -2.98844 |
| Fastkd2   | 0.324009 | 5.502336 | 3.551375 | 0.003379 | 0.066884 | -1.73642 |
| Zkscan6   | 0.323937 | 4.147564 | 5.421696 | 0.000104 | 0.015682 | 1.566726 |
| Agrn      | 0.323798 | 6.094191 | 3.273723 | 0.00581  | 0.086535 | -2.24853 |
| Sdhb      | 0.32373  | 10.93172 | 4.367651 | 0.000705 | 0.033174 | -0.24806 |
| Kcnd2     | 0.323683 | 7.397356 | 2.165697 | 0.04885  | 0.240237 | -4.21423 |
| Clec4g    | 0.323558 | 3.638504 | 3.784953 | 0.002147 | 0.054522 | -1.30631 |
| Map3k10   | 0.323459 | 4.837185 | 4.211311 | 0.000948 | 0.03794  | -0.52912 |
| 5730420D1 | 0.323259 | 4.000171 | 2.926704 | 0.011438 | 0.119327 | -2.88426 |
| Ccbl2     | 0.32314  | 6.942006 | 2.540188 | 0.024138 | 0.17248  | -3.57578 |
| Ralb      | 0.322944 | 7.132012 | 3.496808 | 0.003758 | 0.070029 | -1.83708 |
| Ndufaf7   | 0.322903 | 6.965651 | 4.32746  | 0.000761 | 0.034093 | -0.32008 |
| Pdhb      | 0.322862 | 11.37595 | 4.550439 | 0.000501 | 0.0294   | 0.077167 |
| Ddx19b    | 0.322829 | 4.552528 | 2.392612 | 0.03196  | 0.197039 | -3.83204 |
| Zfp346    | 0.322767 | 5.826423 | 2.27224  | 0.040077 | 0.218537 | -4.03676 |
| Adnp2     | 0.322673 | 4.839559 | 2.630716 | 0.020291 | 0.158179 | -3.41614 |
| lppk      | 0.322601 | 4.387049 | 3.174012 | 0.00706  | 0.094865 | -2.43201 |
| Zfp956    | 0.322578 | 3.818759 | 2.5941   | 0.02177  | 0.163454 | -3.48091 |
| Psme4     | 0.322578 | 10.41943 | 3.565851 | 0.003285 | 0.066241 | -1.70972 |
| Tfb1m     | 0.322388 | 6.205465 | 2.758648 | 0.015852 | 0.13994  | -3.18789 |

|           |          |          |          |          |          |          |
|-----------|----------|----------|----------|----------|----------|----------|
| Flrt2     | 0.322157 | 4.372016 | 2.685227 | 0.018268 | 0.150181 | -3.31924 |
| Psmf1     | 0.321845 | 7.710402 | 2.396853 | 0.031705 | 0.196505 | -3.82475 |
| Mir453    | 0.321696 | 3.582642 | 3.324394 | 0.005262 | 0.082688 | -2.15515 |
| Gm26908   | 0.321669 | 4.220567 | 2.814331 | 0.01423  | 0.133007 | -3.08771 |
| Rbbp6     | 0.321343 | 7.095242 | 3.917594 | 0.001662 | 0.048406 | -1.06314 |
| Klhdc3    | 0.321289 | 9.309082 | 3.432117 | 0.004264 | 0.07495  | -1.95645 |
| 2410002F2 | 0.321275 | 5.612623 | 2.707438 | 0.017502 | 0.14724  | -3.2796  |
| Tle4      | 0.321228 | 5.356903 | 3.748662 | 0.002303 | 0.056471 | -1.37301 |
| Unc119b   | 0.321208 | 5.944458 | 3.266905 | 0.005888 | 0.087093 | -2.26109 |
| N4bp2     | 0.321187 | 5.358022 | 3.344408 | 0.00506  | 0.080917 | -2.11825 |
| 4930538K1 | 0.321038 | 3.906938 | 2.597685 | 0.02162  | 0.162923 | -3.47458 |
| Alad      | 0.321031 | 7.121779 | 2.165787 | 0.048841 | 0.240237 | -4.21408 |
| Zfp703    | 0.321014 | 4.544134 | 3.087872 | 0.008353 | 0.103469 | -2.59008 |
| Myod1     | 0.320953 | 4.05924  | 4.072672 | 0.001234 | 0.041863 | -0.78031 |
| Tanc2     | 0.320889 | 5.001102 | 2.568082 | 0.022883 | 0.167417 | -3.52677 |
| Pgap2     | 0.320821 | 6.971771 | 3.18952  | 0.006849 | 0.093296 | -2.4035  |
| 2310035C2 | 0.320713 | 6.379269 | 5.233826 | 0.000144 | 0.017592 | 1.254808 |
| Gtf2h1    | 0.320665 | 6.441094 | 2.176866 | 0.047852 | 0.238146 | -4.1958  |
| Nabp1     | 0.320509 | 7.460873 | 4.323391 | 0.000767 | 0.034152 | -0.32738 |
| Mtx3      | 0.320343 | 4.40122  | 3.39969  | 0.004542 | 0.077269 | -2.01628 |
| 2210016F1 | 0.320163 | 6.860277 | 3.749454 | 0.0023   | 0.05644  | -1.37155 |
| Gm15328   | 0.320146 | 4.135659 | 3.335746 | 0.005147 | 0.081722 | -2.13422 |
| Sfmbt1    | 0.319878 | 5.673286 | 2.983538 | 0.010239 | 0.113033 | -2.7808  |
| E530011L2 | 0.319695 | 4.597999 | 3.576717 | 0.003216 | 0.06579  | -1.68968 |
| Grap      | 0.319661 | 5.508626 | 2.277568 | 0.03968  | 0.21727  | -4.02779 |
| Abra      | 0.318929 | 9.317993 | 2.910266 | 0.01181  | 0.120438 | -2.91412 |
| Endog     | 0.318882 | 6.283139 | 2.207582 | 0.045205 | 0.231216 | -4.14491 |
| Gm15323   | 0.318858 | 3.673589 | 2.897513 | 0.012107 | 0.121505 | -2.93726 |
| Zfp558    | 0.318814 | 3.779768 | 2.844971 | 0.013409 | 0.128952 | -3.0324  |
| Nlrp1c-ps | 0.318719 | 3.447038 | 4.892534 | 0.000267 | 0.023425 | 0.674744 |
| Sox2      | 0.318397 | 3.535582 | 2.574797 | 0.022591 | 0.166205 | -3.51495 |
| Etohd2    | 0.318298 | 4.105682 | 4.302405 | 0.000798 | 0.034854 | -0.36505 |
| Fam49b    | 0.318244 | 5.918725 | 2.246353 | 0.04206  | 0.223902 | -4.08022 |
| 1700112J1 | 0.318227 | 3.952164 | 3.369736 | 0.004816 | 0.07913  | -2.07154 |
| Olfir631  | 0.317842 | 3.323472 | 2.897751 | 0.012101 | 0.121502 | -2.93683 |
| Hr        | 0.317681 | 4.571927 | 2.721905 | 0.017019 | 0.145017 | -3.25373 |
| Ano1      | 0.317613 | 5.285923 | 3.225    | 0.00639  | 0.090516 | -2.33824 |
| Prkch     | 0.317593 | 7.336531 | 3.423392 | 0.004337 | 0.075607 | -1.97255 |
| Tmem19    | 0.317342 | 5.356588 | 4.09514  | 0.001182 | 0.041181 | -0.73949 |
| Psm8      | 0.317213 | 8.630612 | 2.958952 | 0.010742 | 0.115604 | -2.8256  |
| Prkar1b   | 0.317213 | 4.373695 | 2.687347 | 0.018194 | 0.150016 | -3.31546 |
| Gm694     | 0.317183 | 3.670229 | 3.189786 | 0.006845 | 0.093296 | -2.40301 |
| 5530601HC | 0.317166 | 4.173557 | 3.197195 | 0.006747 | 0.092901 | -2.38939 |
| Chd7      | 0.316983 | 6.000451 | 2.337483 | 0.035462 | 0.205833 | -3.92632 |
| Cox7a1    | 0.316962 | 12.11714 | 3.27867  | 0.005754 | 0.086188 | -2.23942 |
| Pbxip1    | 0.316888 | 6.735755 | 3.363053 | 0.004879 | 0.079595 | -2.08386 |
| B930095G1 | 0.316461 | 4.643419 | 2.548049 | 0.023778 | 0.170986 | -3.56199 |
| Trmt13    | 0.316281 | 3.838398 | 3.575347 | 0.003225 | 0.06579  | -1.6922  |



|           |          |          |          |          |          |          |
|-----------|----------|----------|----------|----------|----------|----------|
| Helq      | 0.316071 | 4.553543 | 2.894853 | 0.01217  | 0.121746 | -2.94208 |
| Ostf1     | 0.315769 | 7.725755 | 3.426677 | 0.004309 | 0.075283 | -1.96649 |
| Taf4b     | 0.315494 | 4.248974 | 3.404974 | 0.004496 | 0.07686  | -2.00653 |
| Zfp595    | 0.315487 | 3.841988 | 2.991866 | 0.010074 | 0.11236  | -2.76561 |
| Calcr     | 0.315467 | 3.676207 | 2.807449 | 0.014422 | 0.13377  | -3.10012 |
| Eif1b     | 0.315396 | 7.937158 | 2.88977  | 0.012291 | 0.122369 | -2.9513  |
| Gfm1      | 0.315375 | 9.123834 | 4.68626  | 0.000389 | 0.027042 | 0.31624  |
| Clec2f    | 0.315264 | 3.182046 | 2.679211 | 0.018482 | 0.151285 | -3.32996 |
| Srrd      | 0.315165 | 4.879425 | 3.444934 | 0.004158 | 0.073894 | -1.9328  |
| Dffa      | 0.315131 | 6.669447 | 2.520485 | 0.025065 | 0.175323 | -3.6103  |
| Mtrr      | 0.314948 | 5.916751 | 2.822957 | 0.013994 | 0.131879 | -3.07215 |
| Gtf2ird1  | 0.314884 | 4.67974  | 2.51131  | 0.025508 | 0.176537 | -3.62634 |
| LOC10263  | 0.314863 | 3.84249  | 3.907367 | 0.001695 | 0.049117 | -1.08185 |
| Gm12216   | 0.314657 | 4.205505 | 2.870625 | 0.012757 | 0.125301 | -2.98599 |
| 1700123L1 | 0.314375 | 3.810182 | 4.245441 | 0.000888 | 0.037186 | -0.46755 |
| Tnks      | 0.314372 | 7.59908  | 3.231546 | 0.006309 | 0.089626 | -2.32619 |
| A330035P1 | 0.314199 | 3.550898 | 3.666128 | 0.002703 | 0.061038 | -1.52489 |
| Zfp939    | 0.314165 | 4.574075 | 2.815315 | 0.014203 | 0.132992 | -3.08594 |
| Vsig10    | 0.31405  | 4.260703 | 2.358705 | 0.034073 | 0.202309 | -3.89013 |
| 6030443J0 | 0.314012 | 4.133325 | 2.667747 | 0.018895 | 0.153053 | -3.35037 |
| Scimp     | 0.314002 | 3.600279 | 2.195171 | 0.046258 | 0.234242 | -4.16551 |
| LnX2      | 0.313931 | 6.670475 | 2.579951 | 0.022369 | 0.165796 | -3.50587 |
| Zfp286    | 0.313863 | 3.61437  | 4.500292 | 0.00055  | 0.030412 | -0.01167 |
| Adipor2   | 0.313741 | 8.146291 | 2.67359  | 0.018683 | 0.152222 | -3.33997 |
| 6030498E0 | 0.313707 | 3.413283 | 3.074115 | 0.008581 | 0.104721 | -2.61528 |
| Pycr2     | 0.313449 | 5.044583 | 2.82328  | 0.013985 | 0.131867 | -3.07157 |
| Wipi2     | 0.313416 | 6.162567 | 2.454968 | 0.028397 | 0.186772 | -3.72441 |
| Bbs10     | 0.313287 | 3.963691 | 3.47865  | 0.003894 | 0.071332 | -1.87059 |
| Ctbs      | 0.313277 | 4.993878 | 2.743726 | 0.016316 | 0.142025 | -3.21466 |
| Cep152    | 0.313253 | 4.071503 | 4.384188 | 0.000684 | 0.033    | -0.21849 |
| Rom1      | 0.3131   | 4.126033 | 2.752694 | 0.016036 | 0.140682 | -3.19858 |
| Mir679    | 0.313015 | 3.896498 | 3.386318 | 0.004662 | 0.077948 | -2.04095 |
| Olfr531   | 0.312968 | 3.540029 | 2.640265 | 0.019922 | 0.156691 | -3.39921 |
| Sell      | 0.312653 | 3.7456   | 3.053733 | 0.008929 | 0.10681  | -2.65259 |
| Skil      | 0.312507 | 5.19971  | 2.355548 | 0.034276 | 0.202761 | -3.89552 |
| Cnga2     | 0.312429 | 3.458542 | 3.229242 | 0.006337 | 0.089974 | -2.33043 |
| lsg20     | 0.312425 | 6.077437 | 2.575505 | 0.02256  | 0.166143 | -3.5137  |
| Lemd2     | 0.312412 | 5.662716 | 3.034076 | 0.009278 | 0.108479 | -2.68853 |
| Uimc1     | 0.31212  | 5.092584 | 3.389751 | 0.004631 | 0.077689 | -2.03462 |
| Zfp109    | 0.3121   | 3.910444 | 3.492513 | 0.00379  | 0.07031  | -1.84501 |
| Thns12    | 0.311642 | 4.512429 | 3.77968  | 0.002169 | 0.05469  | -1.316   |
| Pmvk      | 0.311476 | 5.280738 | 2.15767  | 0.049579 | 0.242188 | -4.22744 |
| Mir3968   | 0.311428 | 3.970737 | 3.252619 | 0.006054 | 0.088068 | -2.2874  |
| Pecr      | 0.311327 | 4.014713 | 3.216501 | 0.006497 | 0.091046 | -2.35388 |
| Rhbdf1    | 0.311259 | 6.26826  | 2.678652 | 0.018501 | 0.151298 | -3.33095 |
| Trmt11    | 0.311117 | 4.808879 | 2.539456 | 0.024172 | 0.172575 | -3.57707 |
| Polh      | 0.311018 | 4.634025 | 2.673253 | 0.018695 | 0.152222 | -3.34057 |
| Fgf1      | 0.311008 | 8.930895 | 2.242847 | 0.042336 | 0.224826 | -4.08609 |

|           |          |          |          |          |          |          |
|-----------|----------|----------|----------|----------|----------|----------|
| Clec4a2   | 0.310879 | 3.494714 | 3.580846 | 0.003191 | 0.065718 | -1.68206 |
| Sh2d1b2   | 0.310623 | 3.336545 | 2.988706 | 0.010137 | 0.112746 | -2.77137 |
| 1810055GC | 0.310567 | 6.766286 | 2.167462 | 0.048691 | 0.239978 | -4.21132 |
| Fam35a    | 0.310527 | 4.248606 | 2.558118 | 0.023324 | 0.169495 | -3.5443  |
| Arrdc4    | 0.310506 | 6.072734 | 3.385008 | 0.004674 | 0.077965 | -2.04337 |
| Cgnl1     | 0.310459 | 6.08394  | 2.356413 | 0.03422  | 0.2026   | -3.89404 |
| Ddx60     | 0.310272 | 4.048854 | 2.650303 | 0.01954  | 0.155006 | -3.38138 |
| Pcbd1     | 0.310228 | 3.793623 | 4.471171 | 0.000581 | 0.031294 | -0.0634  |
| Avpi1     | 0.31016  | 5.288544 | 3.715457 | 0.002456 | 0.057884 | -1.43408 |
| 4930528A1 | 0.310033 | 3.627673 | 2.778974 | 0.01524  | 0.137673 | -3.15138 |
| Nop2      | 0.309923 | 6.695163 | 3.039462 | 0.009181 | 0.108196 | -2.67869 |
| Enho      | 0.309496 | 5.320926 | 2.908903 | 0.011842 | 0.120438 | -2.91659 |
| Ldlrap1   | 0.309462 | 6.34809  | 2.230674 | 0.043307 | 0.227419 | -4.10644 |
| PrkcsH    | 0.309408 | 7.072184 | 3.179314 | 0.006987 | 0.09438  | -2.42226 |
| Klhl22    | 0.309245 | 5.5389   | 2.669512 | 0.01883  | 0.152672 | -3.34723 |
| Bace1     | 0.309082 | 6.080811 | 2.284631 | 0.039159 | 0.215753 | -4.01589 |
| Kctd18    | 0.309028 | 4.467665 | 2.764245 | 0.015681 | 0.139027 | -3.17784 |
| Aga       | 0.30877  | 6.008714 | 2.905663 | 0.011916 | 0.120825 | -2.92247 |
| Dscr3     | 0.308675 | 6.468628 | 3.531958 | 0.003509 | 0.067788 | -1.77223 |
| Tecr      | 0.308553 | 10.79751 | 3.211909 | 0.006556 | 0.091455 | -2.36233 |
| Gm15760   | 0.308539 | 4.477024 | 3.08737  | 0.008362 | 0.103502 | -2.591   |
| 2410141KC | 0.308421 | 3.179764 | 3.071522 | 0.008624 | 0.104858 | -2.62003 |
| Gm614     | 0.30836  | 3.573695 | 3.554192 | 0.003361 | 0.066677 | -1.73122 |
| Slc25a17  | 0.308275 | 6.341963 | 2.983966 | 0.010231 | 0.113027 | -2.78002 |
| Ube4b     | 0.308187 | 8.708781 | 3.838837 | 0.001935 | 0.051921 | -1.20741 |
| Ptcd1     | 0.308072 | 6.202701 | 2.289097 | 0.038833 | 0.21472  | -4.00835 |
| Frk       | 0.307549 | 4.192268 | 2.61424  | 0.020944 | 0.160665 | -3.44532 |
| Prdm10    | 0.307468 | 5.142015 | 2.726187 | 0.016879 | 0.144492 | -3.24607 |
| Ran       | 0.307421 | 6.302148 | 2.275697 | 0.039819 | 0.217702 | -4.03094 |
| Hectd3    | 0.3074   | 5.642632 | 2.59932  | 0.021553 | 0.162659 | -3.4717  |
| Rinl      | 0.307373 | 4.231893 | 3.285735 | 0.005675 | 0.085579 | -2.2264  |
| Fbxo18    | 0.306722 | 6.998901 | 4.005173 | 0.001405 | 0.044371 | -0.9032  |
| Nusap1    | 0.306569 | 3.810511 | 3.875729 | 0.001802 | 0.05036  | -1.13978 |
| Tmem67    | 0.306471 | 5.194088 | 2.570429 | 0.022781 | 0.167256 | -3.52264 |
| Epg5      | 0.306261 | 5.28578  | 3.725499 | 0.002409 | 0.057456 | -1.41561 |
| Plekhg5   | 0.306071 | 6.133341 | 3.59888  | 0.003081 | 0.064197 | -1.64881 |
| Mapk13    | 0.305796 | 3.696762 | 3.393843 | 0.004594 | 0.077427 | -2.02707 |
| Scgb2b11  | 0.305656 | 3.153153 | 2.41663  | 0.03054  | 0.19358  | -3.7907  |
| Ptgfrn    | 0.305562 | 5.813263 | 2.552735 | 0.023566 | 0.170415 | -3.55376 |
| Tbc1d12   | 0.305162 | 5.808668 | 2.634944 | 0.020127 | 0.15749  | -3.40864 |
| Ifi35     | 0.305155 | 6.382884 | 3.143853 | 0.007488 | 0.097601 | -2.48741 |
| Gm14147   | 0.30503  | 3.297372 | 2.767805 | 0.015573 | 0.138715 | -3.17145 |
| Naa25     | 0.304952 | 7.741831 | 2.607596 | 0.021213 | 0.161804 | -3.45707 |
| 2310014FO | 0.304847 | 3.909666 | 3.68465  | 0.002608 | 0.059916 | -1.49078 |
| Dgkq      | 0.304823 | 4.373115 | 3.455881 | 0.004071 | 0.073063 | -1.9126  |
| A330041J2 | 0.304732 | 3.562359 | 3.278904 | 0.005751 | 0.086188 | -2.23899 |
| Casp6     | 0.304328 | 5.43846  | 2.349199 | 0.034689 | 0.203915 | -3.90635 |
| Zfp2      | 0.303935 | 7.058217 | 3.082342 | 0.008444 | 0.104074 | -2.60021 |

|           |          |          |          |          |          |          |
|-----------|----------|----------|----------|----------|----------|----------|
| Pcdhb22   | 0.303599 | 3.861679 | 4.304465 | 0.000794 | 0.034854 | -0.36135 |
| Mtap7d3   | 0.303507 | 3.900452 | 3.659741 | 0.002737 | 0.061504 | -1.53665 |
| B4galt5   | 0.303474 | 5.891483 | 3.365754 | 0.004854 | 0.079559 | -2.07888 |
| 492152810 | 0.30329  | 3.826124 | 2.342279 | 0.035143 | 0.205085 | -3.91815 |
| Wdr83     | 0.303277 | 6.697537 | 4.332392 | 0.000754 | 0.034093 | -0.31123 |
| Yipf5     | 0.303141 | 7.064657 | 2.442414 | 0.029082 | 0.189017 | -3.74616 |
| Xpa       | 0.303128 | 5.927117 | 2.6394   | 0.019955 | 0.156691 | -3.40074 |
| Kifap3    | 0.303107 | 6.758325 | 3.167867 | 0.007145 | 0.09532  | -2.4433  |
| Myo1g     | 0.302955 | 3.954619 | 2.53669  | 0.0243   | 0.17274  | -3.58191 |
| Pik3r4    | 0.302897 | 5.890218 | 2.382683 | 0.032566 | 0.19849  | -3.84908 |
| Susd2     | 0.302775 | 4.819194 | 2.606457 | 0.021259 | 0.16197  | -3.45908 |
| Smndc1    | 0.302626 | 6.713325 | 3.099598 | 0.008164 | 0.102306 | -2.56859 |
| Igkv1-122 | 0.302522 | 3.347143 | 3.246063 | 0.006132 | 0.088386 | -2.29947 |
| Usp18     | 0.30245  | 4.650248 | 2.174517 | 0.04806  | 0.238735 | -4.19968 |
| 4933402Nz | 0.302394 | 3.162834 | 3.714822 | 0.002459 | 0.057893 | -1.43525 |
| Dse       | 0.302372 | 4.641095 | 2.599953 | 0.021527 | 0.162659 | -3.47058 |
| Sp140     | 0.302107 | 3.541597 | 3.01735  | 0.009586 | 0.110277 | -2.71909 |
| Rtl1      | 0.301941 | 4.078135 | 2.738365 | 0.016486 | 0.142794 | -3.22427 |
| Car15     | 0.301931 | 4.268804 | 5.041575 | 0.000204 | 0.02023  | 0.93013  |
| Tmod3     | 0.30188  | 8.223368 | 2.768539 | 0.015551 | 0.138715 | -3.17013 |
| Hoxa6     | 0.301826 | 3.814487 | 2.947295 | 0.010989 | 0.116796 | -2.84681 |
| Cyb5d2    | 0.301602 | 6.807539 | 2.933788 | 0.011282 | 0.118588 | -2.87138 |
| Tmem116   | 0.301534 | 5.443085 | 2.463001 | 0.027967 | 0.185039 | -3.71048 |
| Tgfb1i1   | 0.301493 | 6.235382 | 3.12704  | 0.007738 | 0.098854 | -2.51826 |
| Gm10349   | 0.301378 | 9.716444 | 2.494604 | 0.026334 | 0.179209 | -3.6555  |
| Gm4349    | 0.301363 | 3.240037 | 2.494888 | 0.026319 | 0.179203 | -3.655   |
| 2410137M  | 0.301331 | 3.747915 | 3.716511 | 0.002451 | 0.057821 | -1.43214 |
| Pnpt1     | 0.301317 | 5.920678 | 2.502835 | 0.025923 | 0.178004 | -3.64114 |
| Vwa7      | 0.301256 | 4.529697 | 2.234804 | 0.042975 | 0.22678  | -4.09954 |
| Cst6      | 0.300971 | 3.644626 | 3.987829 | 0.001452 | 0.045198 | -0.93483 |
| Ubp1l     | 0.300913 | 3.484116 | 3.25407  | 0.006037 | 0.087973 | -2.28473 |
| Tpm4      | 0.300883 | 6.600962 | 2.378764 | 0.032807 | 0.198877 | -3.8558  |
| Dnaic2    | 0.300764 | 3.873283 | 3.279426 | 0.005745 | 0.086188 | -2.23803 |
| Slc37a2   | 0.300717 | 4.373747 | 2.298212 | 0.038175 | 0.21282  | -3.99295 |
| Sdr39u1   | 0.300713 | 8.499478 | 2.560044 | 0.023238 | 0.169045 | -3.54091 |
| St3gal3   | 0.30049  | 8.216651 | 2.665538 | 0.018975 | 0.153364 | -3.3543  |
| Gm13840   | 0.300476 | 3.558034 | 2.268183 | 0.040382 | 0.219225 | -4.04359 |
| Gstt3     | 0.300439 | 4.527498 | 2.670744 | 0.018786 | 0.152621 | -3.34504 |
| E130308A1 | 0.300296 | 4.319175 | 2.548768 | 0.023745 | 0.170986 | -3.56072 |
| Wars      | 0.300232 | 7.31369  | 2.684563 | 0.018292 | 0.150226 | -3.32042 |
| 493052611 | 0.300103 | 4.553209 | 3.059672 | 0.008826 | 0.106281 | -2.64172 |
| Epb4.1    | 0.299689 | 8.765405 | 3.560768 | 0.003318 | 0.0664   | -1.71909 |
| Mir5119   | 0.299669 | 3.434096 | 3.822025 | 0.001999 | 0.052809 | -1.23825 |
| Zfyve9    | 0.299371 | 6.545193 | 2.675387 | 0.018618 | 0.152048 | -3.33677 |
| Slc22a1   | 0.29931  | 4.151608 | 2.759697 | 0.01582  | 0.139857 | -3.18601 |
| Rmdn3     | 0.299272 | 3.881326 | 3.967529 | 0.00151  | 0.046171 | -0.97188 |
| Zfp748    | 0.299208 | 4.46894  | 3.501955 | 0.003721 | 0.069651 | -1.82759 |
| Mir1966   | 0.299205 | 3.310816 | 3.160101 | 0.007254 | 0.095923 | -2.45757 |

|           |          |          |          |          |          |          |
|-----------|----------|----------|----------|----------|----------|----------|
| Pdcd11    | 0.299154 | 6.026693 | 3.167215 | 0.007154 | 0.09532  | -2.4445  |
| Ptpn4     | 0.299032 | 7.229594 | 3.010572 | 0.009714 | 0.110923 | -2.73147 |
| Selenbp1  | 0.298991 | 8.248454 | 3.503939 | 0.003706 | 0.069552 | -1.82393 |
| Lrrc8b    | 0.298882 | 4.739285 | 3.018774 | 0.009559 | 0.110073 | -2.71649 |
| Clock     | 0.298882 | 9.446642 | 3.335542 | 0.005149 | 0.081722 | -2.1346  |
| Gys1      | 0.298815 | 9.679355 | 2.362067 | 0.033858 | 0.201798 | -3.88438 |
| Tas2r143  | 0.29872  | 3.814562 | 2.7998   | 0.014637 | 0.134615 | -3.1139  |
| Mb21d1    | 0.298676 | 3.454595 | 3.975891 | 0.001486 | 0.045603 | -0.95661 |
| Dus2      | 0.298557 | 4.857286 | 2.864049 | 0.012921 | 0.126079 | -2.99789 |
| Mad2l1    | 0.298472 | 4.222315 | 2.343945 | 0.035033 | 0.204924 | -3.91531 |
| Ly6g      | 0.298316 | 3.423165 | 2.770124 | 0.015504 | 0.13859  | -3.16728 |
| Il18bp    | 0.298306 | 6.234439 | 2.155872 | 0.049743 | 0.242729 | -4.2304  |
| Rap1gds1  | 0.298225 | 5.81822  | 2.554329 | 0.023494 | 0.170331 | -3.55096 |
| Ptprf     | 0.298157 | 4.96288  | 3.838057 | 0.001938 | 0.051921 | -1.20884 |
| Cdkn1c    | 0.298109 | 5.03675  | 3.182805 | 0.006939 | 0.094011 | -2.41585 |
| Jagn1     | 0.297852 | 5.237305 | 2.511114 | 0.025517 | 0.176554 | -3.62668 |
| Olfr976   | 0.29784  | 3.327224 | 2.382642 | 0.032568 | 0.19849  | -3.84915 |
| Vars      | 0.297465 | 5.08021  | 2.442733 | 0.029065 | 0.189011 | -3.74561 |
| Ap4e1     | 0.297238 | 4.782571 | 2.474093 | 0.027383 | 0.182944 | -3.69121 |
| Oraov1    | 0.297221 | 4.175466 | 3.266417 | 0.005893 | 0.087101 | -2.26199 |
| Crybg3    | 0.297201 | 8.631022 | 3.416356 | 0.004397 | 0.076119 | -1.98553 |
| Gm15417   | 0.297133 | 4.146776 | 3.828633 | 0.001973 | 0.052335 | -1.22613 |
| Acer3     | 0.29698  | 4.335013 | 4.046653 | 0.001297 | 0.042778 | -0.82764 |
| Syce2     | 0.296831 | 3.722878 | 4.069338 | 0.001242 | 0.041978 | -0.78637 |
| Ccdc57    | 0.296577 | 4.180189 | 3.392408 | 0.004607 | 0.077496 | -2.02971 |
| Prpf38a   | 0.296414 | 6.277764 | 2.496475 | 0.02624  | 0.179203 | -3.65223 |
| Mok       | 0.296241 | 3.664396 | 3.260357 | 0.005963 | 0.087566 | -2.27315 |
| 5830454E0 | 0.296071 | 4.192876 | 4.032086 | 0.001334 | 0.043465 | -0.85416 |
| Ptcd3     | 0.296    | 8.543182 | 2.967221 | 0.01057  | 0.11465  | -2.81054 |
| Mrps5     | 0.295987 | 7.553104 | 2.535321 | 0.024364 | 0.17274  | -3.58432 |
| Wdr35     | 0.295905 | 5.509443 | 2.709991 | 0.017416 | 0.146814 | -3.27504 |
| Klf2      | 0.29581  | 6.775835 | 2.547902 | 0.023785 | 0.170986 | -3.56225 |
| LOC102636 | 0.295685 | 3.367325 | 2.358538 | 0.034084 | 0.20232  | -3.89041 |
| Gm4961    | 0.295468 | 3.472685 | 5.414164 | 0.000105 | 0.01573  | 1.554325 |
| Sparc     | 0.295383 | 10.35179 | 2.928136 | 0.011406 | 0.119145 | -2.88165 |
| Pigyl     | 0.295295 | 7.900252 | 4.486193 | 0.000565 | 0.03098  | -0.03671 |
| Slc15a3   | 0.295241 | 3.728756 | 2.996491 | 0.009984 | 0.112245 | -2.75717 |
| Gm11517   | 0.295139 | 3.497911 | 2.532878 | 0.024478 | 0.173074 | -3.5886  |
| Ppib      | 0.294413 | 7.685618 | 2.656177 | 0.01932  | 0.154459 | -3.37095 |
| Adgra3    | 0.294237 | 5.302392 | 2.813481 | 0.014254 | 0.133065 | -3.08924 |
| Pgbd1     | 0.294111 | 4.007245 | 3.303411 | 0.005482 | 0.084015 | -2.19383 |
| Mir1931   | 0.293793 | 3.908859 | 2.903788 | 0.01196  | 0.121061 | -2.92587 |
| Catsper3  | 0.293723 | 3.44984  | 3.334638 | 0.005158 | 0.081722 | -2.13626 |
| Mir423    | 0.293471 | 3.83627  | 2.221865 | 0.044022 | 0.228759 | -4.12114 |
| Dcaf10    | 0.29341  | 6.489478 | 2.537425 | 0.024266 | 0.17274  | -3.58063 |
| BC035044  | 0.293406 | 3.264542 | 3.205051 | 0.006644 | 0.092171 | -2.37494 |
| Rnmt      | 0.292908 | 4.702281 | 2.916208 | 0.011674 | 0.120141 | -2.90333 |
| Mettl13   | 0.292779 | 4.215237 | 3.618764 | 0.002964 | 0.062847 | -1.61216 |

|           |          |          |          |          |          |          |
|-----------|----------|----------|----------|----------|----------|----------|
| Bsdc1     | 0.292657 | 6.890795 | 4.340061 | 0.000743 | 0.033882 | -0.29748 |
| Gm11665   | 0.292582 | 3.650848 | 2.686961 | 0.018207 | 0.150078 | -3.31614 |
| Agpat2    | 0.292487 | 9.039147 | 2.412994 | 0.030751 | 0.194472 | -3.79697 |
| Gm9903    | 0.292433 | 4.010963 | 3.203325 | 0.006667 | 0.092328 | -2.37812 |
| BC031181  | 0.292318 | 6.539388 | 2.840965 | 0.013513 | 0.129708 | -3.03964 |
| Ift22     | 0.292284 | 5.902815 | 2.489794 | 0.026576 | 0.180317 | -3.66388 |
| Nostrin   | 0.292277 | 5.317851 | 2.195093 | 0.046264 | 0.234242 | -4.16564 |
| Synj1     | 0.291843 | 6.521898 | 3.559279 | 0.003328 | 0.066455 | -1.72184 |
| Tacr2     | 0.291782 | 3.709205 | 3.048313 | 0.009024 | 0.107057 | -2.6625  |
| Gm26535   | 0.291765 | 3.998666 | 2.414237 | 0.030679 | 0.194163 | -3.79483 |
| Tfap2b    | 0.291758 | 3.536585 | 3.578676 | 0.003204 | 0.065756 | -1.68607 |
| Lym9      | 0.291728 | 5.691111 | 3.237175 | 0.00624  | 0.08915  | -2.31583 |
| Brap      | 0.291667 | 6.834798 | 3.24724  | 0.006118 | 0.088386 | -2.29731 |
| 2610507B1 | 0.291653 | 9.705071 | 3.756254 | 0.00227  | 0.056155 | -1.35905 |
| Gp1bb     | 0.291409 | 4.130893 | 2.299535 | 0.038081 | 0.212644 | -3.99071 |
| Tmem150c  | 0.291284 | 4.832002 | 2.177576 | 0.047789 | 0.237892 | -4.19463 |
| 1110037F0 | 0.291158 | 5.82901  | 2.793512 | 0.014817 | 0.13562  | -3.12522 |
| Smim5     | 0.291097 | 4.654989 | 3.920958 | 0.001651 | 0.048299 | -1.05699 |
| Scai      | 0.291097 | 5.628784 | 4.526683 | 0.000523 | 0.03012  | 0.035118 |
| Cenpc1    | 0.291036 | 4.352793 | 2.940227 | 0.011141 | 0.117558 | -2.85967 |
| Gm16553   | 0.291005 | 3.656164 | 2.609423 | 0.021139 | 0.161594 | -3.45384 |
| Map3k6    | 0.290975 | 6.893046 | 2.196984 | 0.046102 | 0.233935 | -4.16251 |
| Yif1a     | 0.290846 | 7.814043 | 2.993931 | 0.010034 | 0.112245 | -2.76184 |
| Zfp433    | 0.290836 | 3.430167 | 2.704806 | 0.017591 | 0.147342 | -3.2843  |
| Tmem40    | 0.29067  | 4.427561 | 2.494303 | 0.026349 | 0.179263 | -3.65602 |
| Pdhx      | 0.290554 | 9.207452 | 3.586135 | 0.003158 | 0.065281 | -1.67231 |
| Rhob      | 0.290453 | 8.66964  | 3.343473 | 0.005069 | 0.080993 | -2.11997 |
| Atr       | 0.290324 | 5.022441 | 2.873617 | 0.012683 | 0.124869 | -2.98057 |
| Cpne8     | 0.29028  | 4.870726 | 2.967597 | 0.010563 | 0.114616 | -2.80985 |
| Olf156    | 0.290048 | 3.544031 | 2.422791 | 0.030185 | 0.192505 | -3.78008 |
| 9230020AC | 0.28989  | 3.65292  | 2.301267 | 0.037958 | 0.212405 | -3.98778 |
| 9-Sep     | 0.289856 | 5.698151 | 2.954679 | 0.010832 | 0.116018 | -2.83338 |
| Nsun6     | 0.289819 | 4.449434 | 3.395112 | 0.004583 | 0.077427 | -2.02473 |
| LOC102638 | 0.289503 | 4.31093  | 2.278428 | 0.039616 | 0.217156 | -4.02634 |
| Fkbp6     | 0.289398 | 3.952072 | 4.144255 | 0.001077 | 0.039687 | -0.6504  |
| Mir16-2   | 0.289364 | 3.823637 | 2.398466 | 0.031608 | 0.196396 | -3.82198 |
| Pnlcd1    | 0.289313 | 3.647668 | 2.719794 | 0.017089 | 0.145291 | -3.25751 |
| Olf1340   | 0.289113 | 3.332301 | 3.960531 | 0.00153  | 0.04651  | -0.98466 |
| Dhrs13    | 0.289032 | 4.044907 | 3.355127 | 0.004955 | 0.080194 | -2.09848 |
| Cspg4     | 0.289008 | 5.195123 | 2.380522 | 0.032699 | 0.198714 | -3.85279 |
| 2810408A1 | 0.288991 | 3.601771 | 4.046304 | 0.001298 | 0.042778 | -0.82827 |
| Spock3    | 0.288964 | 3.535351 | 2.551714 | 0.023612 | 0.170472 | -3.55555 |
| Mdn1      | 0.288845 | 4.985894 | 3.819368 | 0.002009 | 0.052913 | -1.24312 |
| Macrod2   | 0.288676 | 3.613413 | 3.101103 | 0.00814  | 0.102306 | -2.56583 |
| Gm9920    | 0.288184 | 3.643767 | 3.24546  | 0.00614  | 0.088386 | -2.30058 |
| Zfp740    | 0.288025 | 5.643199 | 2.29255  | 0.038582 | 0.214051 | -4.00252 |
| Gm2808    | 0.287977 | 7.909776 | 3.504701 | 0.003701 | 0.069541 | -1.82252 |
| Cebpa     | 0.287971 | 4.07115  | 3.410373 | 0.004449 | 0.076357 | -1.99657 |

|            |          |          |          |          |          |          |
|------------|----------|----------|----------|----------|----------|----------|
| Ascl3      | 0.287944 | 3.632741 | 3.940148 | 0.001592 | 0.047441 | -1.0219  |
| Bcl2l1     | 0.287733 | 6.9619   | 2.332712 | 0.035782 | 0.206627 | -3.93444 |
| Cpsf2      | 0.287713 | 6.032691 | 3.533078 | 0.003502 | 0.067746 | -1.77017 |
| A630001G   | 0.287686 | 3.968143 | 3.115225 | 0.007919 | 0.100542 | -2.53994 |
| Gm35857    | 0.287259 | 11.01049 | 3.114137 | 0.007936 | 0.100704 | -2.54193 |
| Ccdc85c    | 0.287225 | 5.775448 | 2.56466  | 0.023034 | 0.168122 | -3.5328  |
| Hibch      | 0.287218 | 7.79579  | 4.346906 | 0.000733 | 0.033694 | -0.28521 |
| Fars2      | 0.287116 | 7.685225 | 2.442698 | 0.029067 | 0.189011 | -3.74567 |
| BC022960   | 0.287055 | 4.036594 | 2.19375  | 0.04638  | 0.234491 | -4.16787 |
| Wdr4       | 0.286879 | 4.3923   | 2.846732 | 0.013363 | 0.128731 | -3.02922 |
| Acsl4      | 0.286601 | 5.885651 | 2.941947 | 0.011104 | 0.11753  | -2.85654 |
| Tle6       | 0.28653  | 4.257197 | 4.618083 | 0.000442 | 0.027766 | 0.196522 |
| Zfp655     | 0.28637  | 7.247515 | 3.134448 | 0.007627 | 0.09819  | -2.50467 |
| Arl4a      | 0.286167 | 6.732764 | 2.26013  | 0.040993 | 0.221062 | -4.05712 |
| Chaf1a     | 0.286129 | 3.851642 | 2.404538 | 0.031247 | 0.195719 | -3.81153 |
| St6galnac5 | 0.286082 | 3.660538 | 2.168187 | 0.048625 | 0.239939 | -4.21013 |
| Coq10b     | 0.285997 | 8.278904 | 3.073192 | 0.008596 | 0.104751 | -2.61697 |
| A530050N   | 0.28594  | 3.685694 | 2.876584 | 0.01261  | 0.124572 | -2.9752  |
| Cyp4f14    | 0.285933 | 3.415265 | 3.162418 | 0.007221 | 0.095643 | -2.45331 |
| 3010003L2  | 0.285892 | 3.633018 | 2.231045 | 0.043277 | 0.227358 | -4.10582 |
| 49304401   | 0.285573 | 3.389531 | 4.413417 | 0.000647 | 0.032755 | -0.16628 |
| Ppie       | 0.285536 | 4.541368 | 3.320596 | 0.005301 | 0.083    | -2.16215 |
| Ift52      | 0.285536 | 6.235216 | 2.41785  | 0.030469 | 0.193269 | -3.7886  |
| Snapc1     | 0.2854   | 5.131958 | 3.634025 | 0.002877 | 0.062351 | -1.58403 |
| Zdhhc13    | 0.285258 | 5.933807 | 2.58514  | 0.022147 | 0.164828 | -3.49672 |
| Megf9      | 0.285129 | 5.926093 | 2.994065 | 0.010031 | 0.112245 | -2.7616  |
| Glmn       | 0.285092 | 3.922575 | 3.064519 | 0.008743 | 0.105922 | -2.63285 |
| Avpr1a     | 0.284909 | 4.468138 | 3.503845 | 0.003707 | 0.069552 | -1.8241  |
| Rasl2-9    | 0.284729 | 3.666046 | 2.167656 | 0.048673 | 0.239939 | -4.211   |
| Nop10      | 0.284478 | 10.26398 | 3.537224 | 0.003474 | 0.067579 | -1.76252 |
| Mettl6     | 0.284451 | 4.907688 | 4.037335 | 0.001321 | 0.043144 | -0.8446  |
| Coq6       | 0.28439  | 6.703556 | 2.74715  | 0.016209 | 0.141633 | -3.20852 |
| Stau2      | 0.28437  | 9.349867 | 4.107585 | 0.001155 | 0.040675 | -0.7169  |
| Maf1       | 0.284153 | 8.00666  | 4.16397  | 0.001037 | 0.039539 | -0.6147  |
| Parp12     | 0.284078 | 6.420522 | 2.401034 | 0.031455 | 0.19618  | -3.81756 |
| Flywch2    | 0.283986 | 3.732732 | 3.104227 | 0.008091 | 0.101976 | -2.56011 |
| Gtpbp8     | 0.283976 | 6.066305 | 2.820411 | 0.014064 | 0.132281 | -3.07675 |
| Gypa       | 0.283944 | 3.504928 | 3.279988 | 0.005739 | 0.086188 | -2.23699 |
| 1810022K   | 0.283839 | 3.411207 | 3.083637 | 0.008423 | 0.103966 | -2.59784 |
| Tmem106c   | 0.283644 | 5.244687 | 3.206329 | 0.006627 | 0.092096 | -2.37259 |
| Smyd5      | 0.283481 | 4.67885  | 2.288267 | 0.038893 | 0.214843 | -4.00975 |
| Pld4       | 0.283447 | 5.239705 | 2.210449 | 0.044965 | 0.23059  | -4.14014 |
| Fasn       | 0.283305 | 5.81076  | 2.276921 | 0.039728 | 0.217347 | -4.02888 |
| Olf943     | 0.283281 | 3.21236  | 3.301625 | 0.005501 | 0.084162 | -2.19712 |
| Mamdc4     | 0.283261 | 4.261259 | 3.451299 | 0.004107 | 0.073296 | -1.92106 |
| Muc1       | 0.283129 | 3.976851 | 2.362492 | 0.03383  | 0.201694 | -3.88365 |
| Kcnk2      | 0.283129 | 4.247277 | 3.077027 | 0.008532 | 0.104487 | -2.60995 |
| Hspa4l     | 0.282993 | 7.204322 | 2.572562 | 0.022688 | 0.166818 | -3.51889 |

|           |          |          |          |          |          |          |
|-----------|----------|----------|----------|----------|----------|----------|
| Farp2     | 0.282905 | 6.670586 | 2.816616 | 0.014167 | 0.1329   | -3.08359 |
| Tcf15     | 0.28285  | 7.200182 | 2.525465 | 0.024827 | 0.174633 | -3.60158 |
| Gigyf2    | 0.282817 | 7.40508  | 3.668118 | 0.002693 | 0.060969 | -1.52123 |
| Ftsj3     | 0.282728 | 7.056241 | 2.616286 | 0.020862 | 0.160601 | -3.4417  |
| Gm34985   | 0.282555 | 3.588625 | 2.919405 | 0.011602 | 0.11989  | -2.89752 |
| Kcnh3     | 0.282511 | 3.962789 | 3.381639 | 0.004705 | 0.078141 | -2.04958 |
| Gm12107   | 0.282379 | 3.725255 | 2.160795 | 0.049294 | 0.241398 | -4.2223  |
| AY074887  | 0.282349 | 3.444967 | 3.038349 | 0.009201 | 0.108254 | -2.68072 |
| Coq3      | 0.282227 | 8.691569 | 3.17574  | 0.007036 | 0.094671 | -2.42883 |
| Mir138-2  | 0.28221  | 3.626294 | 2.373948 | 0.033107 | 0.199719 | -3.86405 |
| B3gnt6    | 0.282193 | 3.719465 | 3.066862 | 0.008703 | 0.105593 | -2.62856 |
| Snx2      | 0.282125 | 7.585724 | 3.627283 | 0.002915 | 0.062595 | -1.59646 |
| Smap2     | 0.281867 | 7.451969 | 2.80514  | 0.014486 | 0.133778 | -3.10428 |
| Ighv2-6-8 | 0.28185  | 3.819392 | 2.482744 | 0.026935 | 0.181566 | -3.67616 |
| Gm16283   | 0.28184  | 3.380422 | 2.248884 | 0.041863 | 0.223135 | -4.07598 |
| Tifab     | 0.281681 | 4.41851  | 3.099828 | 0.008161 | 0.102306 | -2.56817 |
| LOC102637 | 0.281528 | 4.040259 | 2.477831 | 0.027189 | 0.182265 | -3.68471 |
| Morc4     | 0.281464 | 4.000758 | 2.673538 | 0.018685 | 0.152222 | -3.34006 |
| Ntn3      | 0.281453 | 3.980652 | 2.631275 | 0.020269 | 0.158157 | -3.41515 |
| Lrrc46    | 0.281294 | 3.974306 | 4.081371 | 0.001214 | 0.041512 | -0.7645  |
| Ipo8      | 0.281243 | 6.334307 | 2.234956 | 0.042963 | 0.22678  | -4.09929 |
| Haus2     | 0.28123  | 6.367828 | 2.54554  | 0.023893 | 0.171362 | -3.56639 |
| Tmem30b   | 0.280928 | 3.791668 | 2.780395 | 0.015198 | 0.137531 | -3.14882 |
| D330041H1 | 0.280897 | 3.571275 | 2.864922 | 0.012899 | 0.125999 | -2.99631 |
| Clip2     | 0.280687 | 4.95382  | 2.257868 | 0.041167 | 0.221398 | -4.06092 |
| E230029CC | 0.280643 | 3.569928 | 3.295008 | 0.005573 | 0.084885 | -2.20932 |
| Acyp1     | 0.280619 | 6.092458 | 2.26056  | 0.040961 | 0.220997 | -4.0564  |
| Ttc30a2   | 0.280596 | 3.350828 | 2.56124  | 0.023185 | 0.168786 | -3.53881 |
| P2ry6     | 0.280579 | 5.622711 | 2.226687 | 0.043629 | 0.227956 | -4.1131  |
| Pdzph1    | 0.280562 | 3.768617 | 3.148301 | 0.007423 | 0.09723  | -2.47924 |
| A730017L2 | 0.280484 | 4.562442 | 2.182057 | 0.047395 | 0.237082 | -4.18723 |
| Spink4    | 0.280206 | 3.363817 | 2.752395 | 0.016045 | 0.140682 | -3.19911 |
| Mras      | 0.279806 | 4.357839 | 3.286143 | 0.00567  | 0.085579 | -2.22565 |
| Pdrg1     | 0.279744 | 9.426331 | 2.98562  | 0.010198 | 0.112876 | -2.777   |
| Prpf4     | 0.279717 | 6.549852 | 3.015768 | 0.009616 | 0.11045  | -2.72198 |
| Ddx46     | 0.279683 | 7.884308 | 2.516685 | 0.025247 | 0.175619 | -3.61694 |
| Klhl21    | 0.279616 | 6.555661 | 2.492985 | 0.026415 | 0.179495 | -3.65832 |
| Cog7      | 0.279602 | 5.990875 | 2.923494 | 0.01151  | 0.119648 | -2.89009 |
| Paqr4     | 0.279541 | 6.078735 | 2.353814 | 0.034388 | 0.203014 | -3.89848 |
| Nid2      | 0.279439 | 5.184642 | 2.595898 | 0.021695 | 0.163285 | -3.47774 |
| Prkdc     | 0.279385 | 5.379601 | 4.178019 | 0.00101  | 0.039157 | -0.58928 |
| Mtmr12    | 0.279344 | 5.857934 | 2.522518 | 0.024968 | 0.174974 | -3.60674 |
| LOC102638 | 0.279236 | 4.031464 | 2.165011 | 0.048911 | 0.240399 | -4.21536 |
| Vldlr     | 0.27908  | 10.20627 | 2.363371 | 0.033774 | 0.201694 | -3.88215 |
| Csk       | 0.279005 | 4.660824 | 2.707966 | 0.017484 | 0.147206 | -3.27865 |
| A230108P1 | 0.278897 | 3.634972 | 2.923033 | 0.01152  | 0.119648 | -2.89093 |
| Defb35    | 0.278856 | 3.870873 | 2.897323 | 0.012111 | 0.121505 | -2.9376  |
| Gm12185   | 0.278848 | 3.698424 | 2.182453 | 0.04736  | 0.237037 | -4.18657 |

|           |          |          |          |          |          |          |
|-----------|----------|----------|----------|----------|----------|----------|
| Gm13348   | 0.278843 | 3.472836 | 2.753793 | 0.016002 | 0.140614 | -3.1966  |
| Synpo     | 0.278693 | 5.542504 | 2.428416 | 0.029865 | 0.191748 | -3.77036 |
| Cycs      | 0.278693 | 4.254093 | 2.218484 | 0.044299 | 0.229126 | -4.12677 |
| Rsl1d1    | 0.27868  | 8.766619 | 3.568732 | 0.003267 | 0.066221 | -1.7044  |
| Dgkh      | 0.27868  | 5.568865 | 2.772959 | 0.015419 | 0.138229 | -3.16219 |
| Mptx2     | 0.278486 | 3.567954 | 2.849187 | 0.013299 | 0.128397 | -3.02478 |
| Gm7694    | 0.278415 | 4.387743 | 2.721127 | 0.017045 | 0.145017 | -3.25513 |
| 4930524N1 | 0.278358 | 3.233498 | 3.31013  | 0.005411 | 0.08365  | -2.18145 |
| Adgrl4    | 0.2779   | 9.122999 | 2.714711 | 0.017258 | 0.146126 | -3.2666  |
| 1700102H2 | 0.277896 | 3.597688 | 2.591553 | 0.021876 | 0.163799 | -3.48541 |
| Nudt13    | 0.277751 | 7.467163 | 3.755828 | 0.002272 | 0.056155 | -1.35983 |
| Mir7-2    | 0.277724 | 3.640652 | 2.568236 | 0.022877 | 0.167416 | -3.5265  |
| Dsel      | 0.277669 | 4.85612  | 2.273549 | 0.039979 | 0.218332 | -4.03456 |
| Gm15787   | 0.277662 | 4.656572 | 2.762073 | 0.015747 | 0.139409 | -3.18174 |
| Zfp420    | 0.277578 | 3.8411   | 3.263485 | 0.005927 | 0.08729  | -2.26739 |
| Timp4     | 0.277405 | 7.610382 | 2.925789 | 0.011459 | 0.119389 | -2.88592 |
| Ckmt2     | 0.277384 | 11.77639 | 3.794589 | 0.002107 | 0.054404 | -1.28861 |
| Pbld1     | 0.277327 | 4.16202  | 2.236727 | 0.042821 | 0.22645  | -4.09633 |
| Ly6g6d    | 0.277222 | 3.722677 | 2.609265 | 0.021145 | 0.161594 | -3.45412 |
| Rassf9    | 0.277195 | 5.365323 | 2.926868 | 0.011435 | 0.119327 | -2.88396 |
| Yif1b     | 0.276883 | 8.385837 | 2.794274 | 0.014795 | 0.135469 | -3.12385 |
| Pxmp2     | 0.276754 | 9.028676 | 2.616373 | 0.020858 | 0.160601 | -3.44154 |
| D630033O  | 0.276591 | 3.613149 | 2.874695 | 0.012656 | 0.124706 | -2.97862 |
| Josd2     | 0.276442 | 7.494666 | 2.365816 | 0.033619 | 0.201342 | -3.87797 |
| Traj7     | 0.276313 | 3.188368 | 2.966456 | 0.010586 | 0.114721 | -2.81193 |
| Rnf145    | 0.276082 | 5.266622 | 3.104068 | 0.008093 | 0.101976 | -2.5604  |
| Pcca      | 0.275879 | 9.559163 | 3.904118 | 0.001706 | 0.049196 | -1.0878  |
| Nme6      | 0.275845 | 4.94733  | 2.755942 | 0.015935 | 0.140378 | -3.19275 |
| Dusp8     | 0.275682 | 5.797835 | 2.744472 | 0.016293 | 0.141919 | -3.21332 |
| Ddx21     | 0.275601 | 6.875431 | 2.219389 | 0.044225 | 0.229096 | -4.12526 |
| Spryd3    | 0.27557  | 4.538176 | 2.685091 | 0.018273 | 0.150181 | -3.31948 |
| Stx5a     | 0.275486 | 7.45659  | 3.012244 | 0.009682 | 0.110879 | -2.72842 |
| Phtf1os   | 0.275391 | 3.860921 | 3.690132 | 0.00258  | 0.059557 | -1.48069 |
| Isoc2b    | 0.275374 | 3.701652 | 2.437756 | 0.029341 | 0.18995  | -3.75422 |
| Pygo1     | 0.275323 | 7.587206 | 2.49043  | 0.026544 | 0.180148 | -3.66277 |
| Spg21     | 0.275187 | 5.372294 | 3.556896 | 0.003343 | 0.066539 | -1.72623 |
| Epha2     | 0.275102 | 4.634784 | 2.317416 | 0.036825 | 0.20968  | -3.96042 |
| Fam83h    | 0.274916 | 3.939541 | 3.100172 | 0.008155 | 0.102306 | -2.56754 |
| Fkbp1b    | 0.274773 | 3.52142  | 2.789018 | 0.014946 | 0.136388 | -3.13331 |
| Ppp1r10   | 0.274706 | 6.248681 | 2.181315 | 0.04746  | 0.237298 | -4.18845 |
| Vps29     | 0.274706 | 7.997216 | 4.43593  | 0.00062  | 0.032056 | -0.12613 |
| Trdv5     | 0.274382 | 3.457748 | 2.994725 | 0.010018 | 0.112245 | -2.76039 |
| Ctdp1     | 0.27438  | 5.853499 | 2.806247 | 0.014455 | 0.13377  | -3.10228 |
| Mrps28    | 0.274346 | 7.492967 | 2.199354 | 0.0459   | 0.233215 | -4.15858 |
| 1110006O2 | 0.274326 | 3.931352 | 2.353899 | 0.034383 | 0.203014 | -3.89833 |
| Tmem203   | 0.274312 | 5.605255 | 2.268357 | 0.040369 | 0.219225 | -4.04329 |
| Ggnbp1    | 0.274251 | 4.516357 | 3.453644 | 0.004088 | 0.073224 | -1.91673 |
| Bbs2      | 0.274224 | 6.376044 | 2.179187 | 0.047647 | 0.237443 | -4.19197 |



|           |          |          |          |          |          |          |
|-----------|----------|----------|----------|----------|----------|----------|
| Pdcd6     | 0.274095 | 6.637536 | 2.723664 | 0.016962 | 0.144917 | -3.25059 |
| Gimap8    | 0.274095 | 4.734378 | 2.326916 | 0.036174 | 0.207637 | -3.94429 |
| Ccdc130   | 0.274089 | 7.14974  | 3.45292  | 0.004094 | 0.073275 | -1.91807 |
| Serpina1c | 0.27408  | 3.326575 | 2.693042 | 0.017995 | 0.14892  | -3.3053  |
| LOC102637 | 0.273956 | 3.798762 | 3.611622 | 0.003005 | 0.063261 | -1.62532 |
| Wapal     | 0.27381  | 7.763696 | 3.189992 | 0.006842 | 0.093296 | -2.40264 |
| Olf1218   | 0.273756 | 3.491696 | 2.696095 | 0.017889 | 0.148539 | -3.29985 |
| Gm20161   | 0.273712 | 3.394424 | 2.569151 | 0.022837 | 0.167271 | -3.52489 |
| Abi3      | 0.273593 | 6.294512 | 3.020923 | 0.009519 | 0.109775 | -2.71257 |
| Snora36b  | 0.273407 | 3.527735 | 2.56107  | 0.023193 | 0.168786 | -3.53911 |
| Gm15564   | 0.273204 | 3.503464 | 4.084636 | 0.001206 | 0.041464 | -0.75857 |
| Erb2      | 0.27299  | 4.842875 | 2.521984 | 0.024993 | 0.175022 | -3.60767 |
| Rnf20     | 0.272875 | 6.563683 | 2.930996 | 0.011343 | 0.118866 | -2.87646 |
| Susd3     | 0.272725 | 4.170217 | 2.948546 | 0.010962 | 0.116796 | -2.84454 |
| Slfn2     | 0.272719 | 5.004361 | 2.244445 | 0.04221  | 0.224508 | -4.08342 |
| 4933406KC | 0.272508 | 3.753523 | 2.471532 | 0.027517 | 0.18346  | -3.69566 |
| Prdx6     | 0.272169 | 6.805681 | 2.57846  | 0.022433 | 0.165799 | -3.5085  |
| Olf1729   | 0.271973 | 3.161214 | 3.553575 | 0.003365 | 0.066704 | -1.73236 |
| Plekha7   | 0.271884 | 6.049354 | 2.945903 | 0.011019 | 0.116926 | -2.84935 |
| Gm3495    | 0.271881 | 3.426061 | 2.268598 | 0.04035  | 0.219225 | -4.04289 |
| Snord85   | 0.271851 | 3.725606 | 3.921221 | 0.001651 | 0.048299 | -1.05651 |
| Mcee      | 0.271823 | 8.768073 | 2.719155 | 0.01711  | 0.145421 | -3.25865 |
| Slc5a1    | 0.271759 | 3.844294 | 2.450972 | 0.028614 | 0.187299 | -3.73134 |
| Cplx4     | 0.271664 | 3.467701 | 2.380491 | 0.032701 | 0.198714 | -3.85284 |
| Copg2     | 0.271613 | 8.3347   | 2.996176 | 0.00999  | 0.112245 | -2.75775 |
| Ifitm5    | 0.271352 | 4.033137 | 2.27647  | 0.039761 | 0.217483 | -4.02964 |
| Fam69a    | 0.271349 | 5.14072  | 3.014605 | 0.009637 | 0.110613 | -2.72411 |
| Psmc6     | 0.271308 | 9.7268   | 3.03227  | 0.009311 | 0.108723 | -2.69184 |
| Tkfc      | 0.271159 | 4.590007 | 3.796569 | 0.002099 | 0.054401 | -1.28498 |
| Acsf1     | 0.271159 | 11.42855 | 2.41134  | 0.030847 | 0.194736 | -3.79982 |
| Lcn8      | 0.271013 | 3.77841  | 2.87367  | 0.012681 | 0.124869 | -2.98048 |
| Mblac2    | 0.270732 | 5.595327 | 2.211923 | 0.044842 | 0.230232 | -4.13769 |
| Dio2      | 0.270725 | 4.028754 | 2.6842   | 0.018305 | 0.150232 | -3.32107 |
| Abl2      | 0.270677 | 5.30819  | 2.805736 | 0.01447  | 0.13377  | -3.1032  |
| Gm30571   | 0.27042  | 4.338172 | 2.51432  | 0.025362 | 0.176026 | -3.62108 |
| Blmh      | 0.270331 | 7.262933 | 3.560946 | 0.003317 | 0.0664   | -1.71876 |
| Traf4     | 0.270267 | 4.483115 | 2.35808  | 0.034113 | 0.20235  | -3.89119 |
| Tmem209   | 0.270237 | 6.265978 | 2.965762 | 0.0106   | 0.114776 | -2.81319 |
| St6gal1   | 0.270148 | 4.733056 | 3.472572 | 0.00394  | 0.071617 | -1.8818  |
| Prkar2b   | 0.270138 | 3.578998 | 2.251754 | 0.041639 | 0.222469 | -4.07117 |
| 4930442L0 | 0.270099 | 3.506469 | 2.673051 | 0.018702 | 0.152222 | -3.34093 |
| Mir497    | 0.269918 | 3.708038 | 2.603098 | 0.021397 | 0.162223 | -3.46502 |
| Spt1      | 0.269891 | 3.554623 | 2.631768 | 0.02025  | 0.158156 | -3.41428 |
| Gm11744   | 0.269545 | 3.638353 | 3.883821 | 0.001774 | 0.050226 | -1.12496 |
| Cc2d1a    | 0.269446 | 4.713011 | 3.092784 | 0.008274 | 0.103047 | -2.58108 |
| Echs1     | 0.269368 | 10.17896 | 3.850681 | 0.001891 | 0.051557 | -1.18569 |
| Zxda      | 0.269328 | 4.240295 | 3.354938 | 0.004957 | 0.080194 | -2.09883 |
| Med27     | 0.269321 | 6.063534 | 2.39956  | 0.031543 | 0.196396 | -3.82009 |

|           |          |          |          |          |          |          |
|-----------|----------|----------|----------|----------|----------|----------|
| Gtf2a2    | 0.269321 | 5.90468  | 2.601009 | 0.021483 | 0.1626   | -3.46871 |
| Mir129-1  | 0.269275 | 3.392532 | 3.901194 | 0.001715 | 0.049359 | -1.09315 |
| Fbf1      | 0.269121 | 4.350381 | 3.925274 | 0.001638 | 0.048299 | -1.0491  |
| Gml       | 0.269029 | 3.721022 | 2.443566 | 0.029019 | 0.188959 | -3.74417 |
| Ect2      | 0.268914 | 3.779883 | 2.580289 | 0.022354 | 0.165789 | -3.50528 |
| Stard8    | 0.268887 | 6.745609 | 2.386745 | 0.032317 | 0.197782 | -3.84211 |
| Mt3       | 0.268453 | 4.098826 | 2.876611 | 0.012609 | 0.124572 | -2.97515 |
| Gm13748   | 0.268411 | 3.336598 | 3.529316 | 0.003528 | 0.067927 | -1.77711 |
| AI463170  | 0.268372 | 4.128164 | 3.847786 | 0.001902 | 0.051721 | -1.191   |
| Stard3nl  | 0.268328 | 4.223194 | 3.054751 | 0.008911 | 0.106777 | -2.65072 |
| Abhd4     | 0.268283 | 9.265001 | 2.768801 | 0.015543 | 0.138696 | -3.16966 |
| Thap6     | 0.268012 | 5.711806 | 2.923743 | 0.011504 | 0.119648 | -2.88964 |
| Nfrkb     | 0.268005 | 6.25412  | 3.168137 | 0.007141 | 0.09532  | -2.4428  |
| Igkv10-95 | 0.26797  | 3.353956 | 2.237118 | 0.04279  | 0.226334 | -4.09568 |
| Mpc2      | 0.267822 | 10.06588 | 2.970964 | 0.010493 | 0.114365 | -2.80372 |
| Tmem86b   | 0.267788 | 4.162703 | 2.728521 | 0.016803 | 0.144225 | -3.24189 |
| Lonp2     | 0.267653 | 8.356483 | 3.292702 | 0.005598 | 0.085014 | -2.21357 |
| Cstad     | 0.267649 | 4.317744 | 3.071438 | 0.008626 | 0.104858 | -2.62018 |
| Kdm5d     | 0.267504 | 5.14189  | 2.254681 | 0.041412 | 0.221728 | -4.06627 |
| Baz1a     | 0.267076 | 4.891351 | 2.414089 | 0.030687 | 0.194168 | -3.79508 |
| Shtn1     | 0.267046 | 4.279112 | 3.328421 | 0.005221 | 0.082457 | -2.14773 |
| E03004202 | 0.266717 | 4.227678 | 2.308405 | 0.037453 | 0.211396 | -3.9757  |
| Gm16133   | 0.266652 | 3.402369 | 3.410256 | 0.00445  | 0.076357 | -1.99679 |
| Hyal3     | 0.266615 | 4.156908 | 3.312657 | 0.005384 | 0.08365  | -2.17679 |
| Sall3     | 0.266435 | 3.664956 | 2.723564 | 0.016965 | 0.144917 | -3.25076 |
| Olfr120   | 0.266385 | 3.175591 | 2.717241 | 0.017173 | 0.14581  | -3.26207 |
| 493342712 | 0.266084 | 3.584865 | 2.652676 | 0.019451 | 0.154861 | -3.37717 |
| Dnajc28   | 0.265957 | 5.648278 | 2.500265 | 0.026051 | 0.178543 | -3.64562 |
| Cfap36    | 0.265889 | 6.513479 | 2.540906 | 0.024105 | 0.1723   | -3.57452 |
| Cd19      | 0.265883 | 4.094693 | 3.35735  | 0.004934 | 0.08001  | -2.09438 |
| Bglap3    | 0.265839 | 3.754583 | 3.76555  | 0.002229 | 0.05553  | -1.34196 |
| Plau      | 0.2657   | 4.323442 | 2.825191 | 0.013934 | 0.13171  | -3.06812 |
| Aco1      | 0.265632 | 7.241865 | 3.192505 | 0.006809 | 0.09322  | -2.39801 |
| Slc12a2   | 0.265611 | 7.547194 | 2.620545 | 0.020692 | 0.159767 | -3.43416 |
| Cttnbp2   | 0.265435 | 3.807034 | 2.495493 | 0.026289 | 0.179203 | -3.65395 |
| Ufd1l     | 0.265184 | 8.872501 | 3.047942 | 0.009031 | 0.107057 | -2.66318 |
| Osbp      | 0.26515  | 9.36695  | 3.578    | 0.003208 | 0.065756 | -1.68731 |
| 1700030Ml | 0.265096 | 3.846903 | 3.309589 | 0.005416 | 0.083686 | -2.18244 |
| Mat2b     | 0.265008 | 6.502621 | 3.221499 | 0.006434 | 0.090568 | -2.34468 |
| Mon2      | 0.264994 | 8.161794 | 2.65024  | 0.019543 | 0.155006 | -3.3815  |
| Cdk5      | 0.264933 | 6.687317 | 2.682334 | 0.018371 | 0.150575 | -3.32439 |
| Snhg7     | 0.264628 | 4.355784 | 2.18009  | 0.047567 | 0.237359 | -4.19048 |
| Hcfc1r1   | 0.264499 | 8.480557 | 2.389898 | 0.032125 | 0.197284 | -3.8367  |
| Notch3    | 0.264431 | 6.026096 | 3.467474 | 0.003979 | 0.071977 | -1.89121 |
| Tmem126a  | 0.264323 | 8.354492 | 3.139305 | 0.007555 | 0.09798  | -2.49576 |
| Dnttip1   | 0.264275 | 7.886369 | 2.623323 | 0.020581 | 0.159245 | -3.42924 |
| Sharpin   | 0.264262 | 7.140594 | 2.305187 | 0.03768  | 0.212002 | -3.98115 |
| Ift57     | 0.264255 | 5.963182 | 2.887591 | 0.012343 | 0.122737 | -2.95525 |

|           |          |          |          |          |          |          |
|-----------|----------|----------|----------|----------|----------|----------|
| 1700106J1 | 0.264069 | 3.824743 | 2.558297 | 0.023316 | 0.169495 | -3.54398 |
| Catsper2  | 0.263943 | 4.597141 | 2.6752   | 0.018625 | 0.152048 | -3.3371  |
| Accs      | 0.263831 | 5.005125 | 2.344241 | 0.035014 | 0.204907 | -3.91481 |
| Tet2      | 0.263794 | 7.170471 | 2.35179  | 0.03452  | 0.203418 | -3.90193 |
| Igkv8-19  | 0.263787 | 3.482154 | 2.651049 | 0.019512 | 0.155006 | -3.38006 |
| Tssk2     | 0.263719 | 3.488793 | 3.707743 | 0.002493 | 0.058217 | -1.44828 |
| Reps1     | 0.263685 | 6.727709 | 3.079008 | 0.008499 | 0.104434 | -2.60632 |
| E330033B0 | 0.263638 | 4.955224 | 2.993889 | 0.010035 | 0.112245 | -2.76192 |
| Susd6     | 0.263631 | 8.483378 | 2.405897 | 0.031167 | 0.195462 | -3.80919 |
| Cdc25a    | 0.263618 | 4.106825 | 3.57173  | 0.003248 | 0.066073 | -1.69887 |
| 4921511C1 | 0.263468 | 3.811503 | 3.157129 | 0.007296 | 0.096277 | -2.46303 |
| A330076C0 | 0.26339  | 3.453066 | 3.239854 | 0.006207 | 0.088888 | -2.3109  |
| Them4     | 0.26335  | 4.34603  | 2.746794 | 0.01622  | 0.141663 | -3.20916 |
| Ttr       | 0.263306 | 4.15802  | 3.953647 | 0.001551 | 0.046786 | -0.99723 |
| Pcsk2     | 0.263085 | 3.519808 | 2.77429  | 0.015379 | 0.138072 | -3.1598  |
| Ciao1     | 0.263075 | 7.719916 | 3.912611 | 0.001678 | 0.048737 | -1.07226 |
| Cyp51     | 0.262675 | 4.218333 | 2.60148  | 0.021463 | 0.1626   | -3.46788 |
| Tgs1      | 0.262668 | 6.228502 | 2.63404  | 0.020162 | 0.157665 | -3.41025 |
| Gtf2a1    | 0.262587 | 7.290961 | 3.535945 | 0.003482 | 0.067579 | -1.76488 |
| Dct       | 0.262509 | 4.424711 | 2.428462 | 0.029863 | 0.191748 | -3.77028 |
| Kif9      | 0.262383 | 3.65113  | 2.202081 | 0.045669 | 0.232519 | -4.15405 |
| Jag1      | 0.262349 | 6.079417 | 2.775098 | 0.015355 | 0.138055 | -3.15834 |
| Sirt3     | 0.262343 | 5.514309 | 2.257994 | 0.041157 | 0.221398 | -4.06071 |
| Ticam2    | 0.262044 | 3.923584 | 3.607411 | 0.00303  | 0.06362  | -1.63309 |
| Lce1g     | 0.261998 | 3.160296 | 2.789822 | 0.014923 | 0.136342 | -3.13186 |
| Snora43   | 0.261875 | 5.492265 | 2.517925 | 0.025188 | 0.175556 | -3.61477 |
| Gm14808   | 0.261837 | 3.683328 | 4.580515 | 0.000473 | 0.028709 | 0.130304 |
| Ipo11     | 0.261698 | 7.111969 | 4.0252   | 0.001352 | 0.043699 | -0.8667  |
| Ttll4     | 0.261678 | 5.470032 | 2.715087 | 0.017245 | 0.146119 | -3.26593 |
| Scfd1     | 0.261542 | 6.253493 | 2.543403 | 0.023991 | 0.171813 | -3.57014 |
| Mir28c    | 0.261361 | 3.346826 | 3.435403 | 0.004236 | 0.074637 | -1.95039 |
| Kdm2b     | 0.261292 | 4.893667 | 2.21831  | 0.044314 | 0.229126 | -4.12706 |
| Blm       | 0.261132 | 4.064729 | 2.497848 | 0.026171 | 0.179011 | -3.64984 |
| Stradb    | 0.261095 | 7.795749 | 2.270639 | 0.040197 | 0.219001 | -4.03946 |
| Zbtb45    | 0.260939 | 4.149594 | 2.358245 | 0.034102 | 0.202335 | -3.89091 |
| Mir1933   | 0.260905 | 4.756266 | 2.345558 | 0.034927 | 0.204726 | -3.91256 |
| Klhdc2    | 0.260837 | 9.108609 | 2.447558 | 0.0288   | 0.18807  | -3.73725 |
| Gm12171   | 0.260742 | 3.242839 | 3.647522 | 0.002803 | 0.061834 | -1.55916 |
| Mageh1    | 0.260722 | 4.40803  | 2.919991 | 0.011589 | 0.11989  | -2.89645 |
| Rai14     | 0.260451 | 5.084001 | 2.955581 | 0.010813 | 0.115914 | -2.83173 |
| Ano5      | 0.2604   | 3.624259 | 2.759091 | 0.015838 | 0.139922 | -3.1871  |
| Eci2      | 0.260376 | 8.93455  | 2.168796 | 0.048571 | 0.239939 | -4.20912 |
| Gm2762    | 0.260332 | 4.08028  | 2.749007 | 0.01615  | 0.141224 | -3.20519 |
| Nup54     | 0.260179 | 5.539269 | 2.64192  | 0.019858 | 0.156424 | -3.39627 |
| Wbp5      | 0.260145 | 7.687364 | 2.714742 | 0.017257 | 0.146126 | -3.26654 |
| A930002C0 | 0.260122 | 4.826838 | 2.255587 | 0.041342 | 0.221709 | -4.06475 |
| 7630403G2 | 0.260098 | 3.347416 | 2.80586  | 0.014466 | 0.13377  | -3.10298 |
| Sra1      | 0.259928 | 7.448812 | 3.094777 | 0.008241 | 0.102801 | -2.57743 |

|           |          |          |          |          |          |          |
|-----------|----------|----------|----------|----------|----------|----------|
| F930015NC | 0.259925 | 3.655923 | 2.684344 | 0.0183   | 0.150232 | -3.32081 |
| Stx17     | 0.259772 | 7.004723 | 2.395887 | 0.031763 | 0.196662 | -3.82641 |
| Mir181b-2 | 0.259769 | 3.901043 | 2.600174 | 0.021517 | 0.162659 | -3.47019 |
| Srgap1    | 0.259562 | 4.275289 | 2.637931 | 0.020011 | 0.156933 | -3.40335 |
| Tekt2     | 0.259538 | 3.750537 | 4.450908 | 0.000603 | 0.031585 | -0.09945 |
| Gcfc2     | 0.259101 | 4.09     | 3.037442 | 0.009217 | 0.108303 | -2.68238 |
| Adk       | 0.25906  | 9.310194 | 2.592922 | 0.021819 | 0.163663 | -3.48299 |
| Rspry1    | 0.259013 | 5.384715 | 2.203564 | 0.045543 | 0.232153 | -4.15159 |
| Igkv8-30  | 0.258976 | 3.634289 | 2.53347  | 0.024451 | 0.172928 | -3.58756 |
| Olf116    | 0.258714 | 3.685998 | 2.615935 | 0.020876 | 0.160601 | -3.44232 |
| Mir24-2   | 0.258501 | 3.386819 | 2.60854  | 0.021174 | 0.16172  | -3.4554  |
| Jrkl      | 0.258382 | 5.114868 | 2.594603 | 0.021749 | 0.163395 | -3.48003 |
| Plekhn1   | 0.258379 | 3.783324 | 2.472129 | 0.027485 | 0.183372 | -3.69462 |
| E2f7      | 0.258274 | 4.307197 | 2.89418  | 0.012186 | 0.121839 | -2.9433  |
| Mut       | 0.25807  | 9.261197 | 2.863342 | 0.012939 | 0.126139 | -2.99917 |
| LOC106740 | 0.25785  | 4.314146 | 2.398649 | 0.031597 | 0.196396 | -3.82166 |
| Ulbp1     | 0.257711 | 3.608999 | 3.534919 | 0.003489 | 0.067609 | -1.76677 |
| Lonrf2    | 0.257524 | 4.198993 | 2.960972 | 0.0107   | 0.11545  | -2.82192 |
| Myo1h     | 0.257477 | 3.741369 | 3.015688 | 0.009617 | 0.11045  | -2.72213 |
| 2210016L2 | 0.257467 | 6.311351 | 2.55344  | 0.023534 | 0.170415 | -3.55252 |
| Rpe       | 0.257453 | 5.288883 | 2.356092 | 0.034241 | 0.20265  | -3.89459 |
| Mtmr7     | 0.257401 | 3.469439 | 2.824657 | 0.013948 | 0.131762 | -3.06908 |
| Pyhin1    | 0.257363 | 3.353617 | 2.775378 | 0.015347 | 0.13803  | -3.15784 |
| Tshz2     | 0.257297 | 5.700751 | 2.947281 | 0.010989 | 0.116796 | -2.84684 |
| Il2rb     | 0.257239 | 3.676146 | 3.332529 | 0.005179 | 0.081936 | -2.14015 |
| Phactr2   | 0.257202 | 7.634135 | 2.385799 | 0.032374 | 0.197843 | -3.84373 |
| Mir1898   | 0.25708  | 5.355265 | 2.502719 | 0.025929 | 0.178004 | -3.64134 |
| Tipin     | 0.256995 | 4.314858 | 2.948729 | 0.010958 | 0.116796 | -2.8442  |
| Zfp408    | 0.256985 | 4.595615 | 2.442584 | 0.029073 | 0.189011 | -3.74587 |
| 3110053B1 | 0.256972 | 3.678372 | 2.682414 | 0.018368 | 0.150575 | -3.32425 |
| Elavl1    | 0.256632 | 7.666077 | 3.437637 | 0.004218 | 0.074422 | -1.94627 |
| Rtcb      | 0.256558 | 7.40253  | 2.226947 | 0.043608 | 0.227942 | -4.11266 |
| Kbtbd7    | 0.256321 | 5.737698 | 2.675065 | 0.01863  | 0.152048 | -3.33734 |
| Dnase2b   | 0.256321 | 3.627753 | 2.468372 | 0.027682 | 0.184056 | -3.70115 |
| Mir1249   | 0.25631  | 3.549054 | 2.730058 | 0.016753 | 0.144013 | -3.23914 |
| Nabp2     | 0.256287 | 7.906626 | 2.803458 | 0.014534 | 0.134066 | -3.10731 |
| Pald1     | 0.256287 | 4.979543 | 2.424254 | 0.030102 | 0.19235  | -3.77755 |
| Fbxw19    | 0.256222 | 3.199156 | 4.107376 | 0.001155 | 0.040675 | -0.71727 |
| Dennd4b   | 0.256056 | 6.458594 | 2.9191   | 0.011609 | 0.11989  | -2.89807 |
| 4930563E2 | 0.256019 | 4.134845 | 2.700806 | 0.017727 | 0.147986 | -3.29144 |
| Hnrnpa2b1 | 0.256009 | 7.555088 | 2.22675  | 0.043624 | 0.227956 | -4.11299 |
| Ak6       | 0.255934 | 6.034543 | 2.347474 | 0.034801 | 0.204289 | -3.9093  |
| Nek6      | 0.255795 | 4.401498 | 2.800589 | 0.014615 | 0.134544 | -3.11248 |
| Gm11127   | 0.25572  | 3.604016 | 3.30863  | 0.005427 | 0.083689 | -2.18421 |
| Sec13     | 0.255561 | 7.822605 | 2.301083 | 0.037971 | 0.212405 | -3.9881  |
| Krt36     | 0.255371 | 3.770752 | 3.311538 | 0.005396 | 0.08365  | -2.17885 |
| Usp3      | 0.25533  | 6.848043 | 3.049176 | 0.009009 | 0.107004 | -2.66092 |
| Gm19708   | 0.255307 | 3.780892 | 2.751739 | 0.016065 | 0.140776 | -3.20029 |

|           |          |          |          |          |          |          |
|-----------|----------|----------|----------|----------|----------|----------|
| Teddm3    | 0.2553   | 3.388474 | 3.904982 | 0.001703 | 0.049196 | -1.08622 |
| Zfp12     | 0.255063 | 4.135669 | 2.324405 | 0.036345 | 0.208317 | -3.94856 |
| Gm17746   | 0.255032 | 3.959059 | 2.412087 | 0.030804 | 0.194658 | -3.79853 |
| Fam50b    | 0.254996 | 3.389949 | 2.74984  | 0.016124 | 0.141046 | -3.20369 |
| Pih1h3b   | 0.254832 | 3.803848 | 2.444924 | 0.028944 | 0.188611 | -3.74182 |
| Khynyn    | 0.254737 | 4.855721 | 2.738723 | 0.016475 | 0.142756 | -3.22362 |
| Dock7     | 0.254605 | 6.161808 | 2.698585 | 0.017803 | 0.148124 | -3.29541 |
| Ikzf2     | 0.254574 | 4.647307 | 2.439513 | 0.029243 | 0.189565 | -3.75118 |
| Zscan25   | 0.254523 | 4.9562   | 2.886988 | 0.012357 | 0.122783 | -2.95634 |
| Gm9958    | 0.25433  | 3.602019 | 2.806143 | 0.014458 | 0.13377  | -3.10247 |
| Sipa1     | 0.254232 | 5.802734 | 2.406987 | 0.031103 | 0.195207 | -3.80732 |
| Gm30473   | 0.254066 | 3.487384 | 2.600936 | 0.021486 | 0.1626   | -3.46884 |
| Jdp2      | 0.254018 | 5.079809 | 2.558154 | 0.023323 | 0.169495 | -3.54424 |
| Ptprn     | 0.25394  | 3.826026 | 3.697552 | 0.002543 | 0.058979 | -1.46703 |
| Gm14089   | 0.253896 | 4.225418 | 3.103664 | 0.0081   | 0.102004 | -2.56114 |
| Mrps2     | 0.253886 | 6.268382 | 2.200926 | 0.045767 | 0.232909 | -4.15597 |
| Vmn1r177  | 0.253816 | 3.16182  | 2.509408 | 0.0256   | 0.176732 | -3.62966 |
| Gm12790   | 0.253747 | 3.927817 | 2.225602 | 0.043717 | 0.228033 | -4.11491 |
| 1500004A1 | 0.253608 | 3.793389 | 2.176673 | 0.047869 | 0.238147 | -4.19612 |
| Otc       | 0.253396 | 3.40689  | 2.900095 | 0.012046 | 0.121279 | -2.93257 |
| Ccnjl     | 0.25332  | 4.41735  | 3.398223 | 0.004555 | 0.077338 | -2.01899 |
| 2310002DC | 0.253279 | 3.606783 | 3.483769 | 0.003855 | 0.070922 | -1.86114 |
| Sarnp     | 0.253265 | 3.998133 | 2.301979 | 0.037907 | 0.212389 | -3.98658 |
| Trub1     | 0.253092 | 5.664795 | 3.393868 | 0.004594 | 0.077427 | -2.02702 |
| Nr1h2     | 0.252787 | 8.651459 | 3.079747 | 0.008487 | 0.104396 | -2.60497 |
| Ptges2    | 0.252631 | 7.063653 | 2.156254 | 0.049708 | 0.242637 | -4.22977 |
| Cacng1    | 0.25238  | 3.754201 | 3.051927 | 0.008961 | 0.106878 | -2.65589 |
| Pds5a     | 0.252245 | 8.058089 | 3.163817 | 0.007202 | 0.095585 | -2.45074 |
| 3110056KC | 0.252072 | 4.32851  | 2.457553 | 0.028258 | 0.186337 | -3.71993 |
| Pcna      | 0.252062 | 9.136122 | 3.029408 | 0.009363 | 0.108872 | -2.69707 |
| Stim2     | 0.251912 | 6.654602 | 2.910373 | 0.011808 | 0.120438 | -2.91392 |
| Tmem69    | 0.25175  | 6.44635  | 2.222292 | 0.043987 | 0.228638 | -4.12043 |
| Kcnn1     | 0.251729 | 5.428436 | 2.194001 | 0.046358 | 0.234491 | -4.16745 |
| Nfkb1     | 0.251383 | 7.018595 | 2.7999   | 0.014634 | 0.134615 | -3.11372 |
| Eif4g3    | 0.251282 | 7.467112 | 2.816063 | 0.014183 | 0.13292  | -3.08459 |
| Cand1     | 0.25118  | 6.994405 | 2.457936 | 0.028237 | 0.186301 | -3.71927 |
| Ntf5      | 0.251126 | 3.782708 | 2.358695 | 0.034073 | 0.202309 | -3.89014 |
| Olfr1277  | 0.251065 | 3.203088 | 2.992239 | 0.010067 | 0.112329 | -2.76493 |
| Cyb5a     | 0.250827 | 8.690518 | 3.232687 | 0.006295 | 0.089626 | -2.32409 |
| Dnajc13   | 0.250821 | 7.40015  | 2.705145 | 0.017579 | 0.147342 | -3.28369 |
| Purg      | 0.250651 | 4.419759 | 2.418101 | 0.030455 | 0.193269 | -3.78817 |
| Col28a1   | 0.250468 | 3.786448 | 2.680603 | 0.018432 | 0.150929 | -3.32748 |
| Micalcl   | 0.250339 | 3.77613  | 2.480672 | 0.027042 | 0.182026 | -3.67976 |
| 1700025C1 | 0.250231 | 3.702589 | 2.469754 | 0.02761  | 0.183819 | -3.69875 |
| 9130221F2 | 0.25022  | 3.417347 | 3.350564 | 0.005    | 0.080606 | -2.1069  |
| Ccna1     | 0.250203 | 3.742045 | 3.94072  | 0.00159  | 0.047441 | -1.02085 |
| Cyp2d9    | 0.250153 | 3.284907 | 2.229691 | 0.043386 | 0.227575 | -4.10808 |
| Pkn1      | 0.250115 | 7.00315  | 2.252623 | 0.041572 | 0.222269 | -4.06972 |

|           |          |          |          |          |          |          |
|-----------|----------|----------|----------|----------|----------|----------|
| Klk14     | 0.250078 | 3.553262 | 3.008871 | 0.009746 | 0.11113  | -2.73458 |
| 493059612 | 0.249963 | 3.400779 | 3.491161 | 0.0038   | 0.070391 | -1.8475  |
| Pigb      | 0.249888 | 4.623154 | 2.49291  | 0.026419 | 0.179495 | -3.65845 |
| Ttk       | 0.249864 | 3.706882 | 3.365735 | 0.004854 | 0.079559 | -2.07892 |
| Ipcef1    | 0.249746 | 3.680944 | 4.087549 | 0.0012   | 0.041309 | -0.75328 |
| Traj9     | 0.249647 | 3.486233 | 2.626513 | 0.020456 | 0.158815 | -3.42359 |
| Polg      | 0.249552 | 6.302022 | 3.117208 | 0.007888 | 0.100255 | -2.5363  |
| Gm4532    | 0.249495 | 3.993969 | 2.50983  | 0.02558  | 0.176732 | -3.62892 |
| Gm10277   | 0.249369 | 3.884857 | 2.411676 | 0.030828 | 0.194714 | -3.79924 |
| Trav14d-3 | 0.249339 | 3.596756 | 2.577451 | 0.022476 | 0.165987 | -3.51028 |
| Topbp1    | 0.249335 | 5.725091 | 2.441952 | 0.029108 | 0.189084 | -3.74696 |
| Pfkfb4    | 0.249261 | 4.129432 | 2.477478 | 0.027207 | 0.182308 | -3.68532 |
| Bend6     | 0.249095 | 3.665075 | 2.302779 | 0.03785  | 0.212307 | -3.98523 |
| Mccc2     | 0.249084 | 7.665232 | 2.421123 | 0.030281 | 0.192825 | -3.78295 |
| Spata17   | 0.248857 | 3.570962 | 2.530214 | 0.024603 | 0.173513 | -3.59326 |
| Txndc5    | 0.248806 | 5.909397 | 2.17597  | 0.047931 | 0.238361 | -4.19728 |
| Tnfrsf10b | 0.248674 | 4.184477 | 3.263898 | 0.005922 | 0.087289 | -2.26663 |
| Gtf2e1    | 0.248657 | 4.308573 | 2.409255 | 0.030969 | 0.194862 | -3.80341 |
| Klra6     | 0.248369 | 3.118407 | 3.125966 | 0.007754 | 0.09896  | -2.52024 |
| Smu1      | 0.248338 | 5.90249  | 2.609039 | 0.021154 | 0.161614 | -3.45452 |
| Hat1      | 0.24821  | 7.254313 | 4.016159 | 0.001375 | 0.043852 | -0.88317 |
| 4933413L0 | 0.248198 | 3.155756 | 3.294801 | 0.005575 | 0.084885 | -2.2097  |
| Mir362    | 0.248103 | 3.270943 | 3.083082 | 0.008432 | 0.103975 | -2.59886 |
| Emcn      | 0.24804  | 8.263994 | 2.531056 | 0.024564 | 0.173382 | -3.59179 |
| Arap3     | 0.247911 | 6.25156  | 2.505257 | 0.025804 | 0.177402 | -3.63691 |
| E430016F1 | 0.247854 | 3.713852 | 2.389617 | 0.032142 | 0.197284 | -3.83718 |
| Il1rl1    | 0.24764  | 3.663534 | 2.525216 | 0.024839 | 0.174633 | -3.60202 |
| Klhl31    | 0.247572 | 9.850674 | 2.947573 | 0.010983 | 0.116796 | -2.84631 |
| Heph      | 0.247518 | 4.20579  | 2.303732 | 0.037783 | 0.212306 | -3.98361 |
| Nelfb     | 0.247498 | 6.019257 | 2.257935 | 0.041162 | 0.221398 | -4.0608  |
| Klhl34    | 0.247498 | 4.245982 | 2.810254 | 0.014343 | 0.133449 | -3.09506 |
| Lin54     | 0.247348 | 5.175432 | 2.909649 | 0.011824 | 0.120438 | -2.91523 |
| 2610206C1 | 0.247345 | 3.240779 | 3.192453 | 0.00681  | 0.09322  | -2.39811 |
| G6pc2     | 0.247243 | 3.600672 | 3.808688 | 0.002051 | 0.053574 | -1.26273 |
| Prune     | 0.24724  | 7.082442 | 2.823578 | 0.013977 | 0.131867 | -3.07103 |
| Cnbd2     | 0.247019 | 3.6996   | 4.217439 | 0.000937 | 0.037622 | -0.51806 |
| Mtcl1     | 0.247009 | 4.474091 | 2.431227 | 0.029706 | 0.191272 | -3.76551 |
| Zfp72     | 0.246919 | 3.359218 | 2.563647 | 0.023079 | 0.168399 | -3.53458 |
| Hand2     | 0.246867 | 7.000549 | 2.362575 | 0.033825 | 0.201694 | -3.88351 |
| Asb17     | 0.246709 | 3.331037 | 2.783719 | 0.015101 | 0.137258 | -3.14284 |
| Gm5420    | 0.246585 | 3.541994 | 3.321153 | 0.005295 | 0.083    | -2.16113 |
| Spib      | 0.246402 | 3.548576 | 2.409879 | 0.030933 | 0.194856 | -3.80234 |
| Gm16976   | 0.246273 | 3.74773  | 2.906313 | 0.011901 | 0.120763 | -2.92129 |
| 9230104L0 | 0.24624  | 3.984855 | 2.410447 | 0.0309   | 0.194818 | -3.80136 |
| Olfr290   | 0.246095 | 3.221436 | 2.404853 | 0.031229 | 0.195651 | -3.81099 |
| Tmsb15b1  | 0.245555 | 3.189102 | 2.280711 | 0.039447 | 0.216767 | -4.0225  |
| Zfp526    | 0.245466 | 4.204032 | 2.30428  | 0.037744 | 0.212239 | -3.98268 |
| Katna1    | 0.245402 | 4.60203  | 2.242767 | 0.042342 | 0.224826 | -4.08623 |

|           |          |          |          |          |          |          |
|-----------|----------|----------|----------|----------|----------|----------|
| Ndufc1    | 0.245266 | 11.45434 | 2.671177 | 0.01877  | 0.152621 | -3.34426 |
| Fam135a   | 0.245199 | 7.549357 | 3.63981  | 0.002845 | 0.062253 | -1.57337 |
| Camkmt    | 0.245178 | 5.324575 | 2.466304 | 0.027792 | 0.184486 | -3.70474 |
| Pcdhb19   | 0.245104 | 3.779534 | 3.370316 | 0.00481  | 0.079093 | -2.07047 |
| Ndufa9    | 0.24509  | 11.06786 | 3.463469 | 0.004011 | 0.072198 | -1.8986  |
| Gjc1      | 0.244961 | 4.23625  | 2.615752 | 0.020883 | 0.160601 | -3.44264 |
| Ctr9      | 0.244948 | 6.068437 | 2.263261 | 0.040755 | 0.2203   | -4.05186 |
| lars      | 0.244887 | 8.842821 | 2.392697 | 0.031955 | 0.197039 | -3.83189 |
| Mfsd5     | 0.244771 | 5.775055 | 2.614946 | 0.020915 | 0.160601 | -3.44407 |
| Krtap21-1 | 0.244642 | 3.310391 | 2.277723 | 0.039668 | 0.217261 | -4.02753 |
| Ermap     | 0.244592 | 3.983054 | 2.482771 | 0.026934 | 0.181566 | -3.67611 |
| Naa11     | 0.244575 | 4.018853 | 2.526155 | 0.024795 | 0.174472 | -3.60037 |
| Pigu      | 0.244514 | 7.614119 | 2.508603 | 0.02564  | 0.176832 | -3.63107 |
| Nepn      | 0.244507 | 3.686625 | 3.342673 | 0.005077 | 0.081068 | -2.12145 |
| Dnm3      | 0.244493 | 6.671075 | 2.436691 | 0.0294   | 0.189988 | -3.75606 |
| Usp14     | 0.24448  | 7.549649 | 3.017982 | 0.009574 | 0.110192 | -2.71794 |
| Olfr137   | 0.244422 | 3.493712 | 2.552482 | 0.023577 | 0.170415 | -3.5542  |
| N4bp1     | 0.244392 | 6.967248 | 2.342893 | 0.035103 | 0.205016 | -3.9171  |
| Exosc2    | 0.244103 | 4.777813 | 2.163875 | 0.049014 | 0.240713 | -4.21723 |
| Fanca     | 0.244046 | 3.905145 | 2.777625 | 0.01528  | 0.137678 | -3.1538  |
| Pdcd2l    | 0.244039 | 7.166616 | 2.339771 | 0.03531  | 0.205541 | -3.92242 |
| Gm14762   | 0.243985 | 3.475182 | 3.085324 | 0.008395 | 0.103728 | -2.59475 |
| Arsb      | 0.243964 | 6.231683 | 2.302542 | 0.037867 | 0.212307 | -3.98563 |
| Whrn      | 0.24389  | 5.489621 | 2.41081  | 0.030878 | 0.194783 | -3.80073 |
| 1700080G1 | 0.243791 | 3.529773 | 2.637509 | 0.020027 | 0.157011 | -3.40409 |
| Kera      | 0.243652 | 3.520264 | 2.996165 | 0.00999  | 0.112245 | -2.75777 |
| Myl10     | 0.243629 | 3.692615 | 3.296481 | 0.005557 | 0.084807 | -2.2066  |
| Art4      | 0.24351  | 7.79835  | 2.496944 | 0.026216 | 0.179136 | -3.65142 |
| Dos       | 0.243388 | 4.518992 | 2.41822  | 0.030448 | 0.193269 | -3.78796 |
| Olfr1014  | 0.243235 | 3.556432 | 3.499027 | 0.003742 | 0.069861 | -1.83299 |
| Klk1b16   | 0.243174 | 3.296229 | 2.740966 | 0.016404 | 0.142436 | -3.2196  |
| Zfp597    | 0.243093 | 4.333623 | 2.217555 | 0.044376 | 0.229137 | -4.12832 |
| Tshz1     | 0.243076 | 7.016883 | 2.476129 | 0.027277 | 0.182517 | -3.68767 |
| 4933412E1 | 0.243073 | 4.334915 | 2.377728 | 0.032872 | 0.198988 | -3.85757 |
| Dcaf12l1  | 0.243039 | 3.839049 | 3.035111 | 0.00926  | 0.108326 | -2.68664 |
| Sc1t1     | 0.242988 | 4.716871 | 2.254581 | 0.04142  | 0.221728 | -4.06643 |
| Kcnc2     | 0.242835 | 3.509357 | 4.156718 | 0.001051 | 0.039677 | -0.62783 |
| Mir3105   | 0.242828 | 3.225744 | 3.594705 | 0.003106 | 0.064522 | -1.65651 |
| Ms4a4c    | 0.242811 | 3.706285 | 2.363362 | 0.033775 | 0.201694 | -3.88217 |
| Tnfrsf1b  | 0.24275  | 4.83508  | 2.446619 | 0.028851 | 0.188298 | -3.73888 |
| 5031425F1 | 0.242571 | 3.575794 | 2.572299 | 0.022699 | 0.166818 | -3.51935 |
| Svil      | 0.242459 | 9.154433 | 3.074401 | 0.008576 | 0.104714 | -2.61476 |
| Il27ra    | 0.242388 | 4.579853 | 2.275783 | 0.039812 | 0.217702 | -4.0308  |
| Bms1      | 0.242093 | 6.180454 | 2.173112 | 0.048185 | 0.238969 | -4.202   |
| Fiz1      | 0.242025 | 5.542562 | 2.268107 | 0.040387 | 0.219225 | -4.04372 |
| Gpr174    | 0.241998 | 3.341702 | 2.418656 | 0.030423 | 0.193269 | -3.78721 |
| Efcab14   | 0.241977 | 8.436093 | 2.633465 | 0.020184 | 0.15779  | -3.41127 |
| Spon2     | 0.241957 | 4.149706 | 3.312126 | 0.00539  | 0.08365  | -2.17777 |

|           |          |          |          |          |          |          |
|-----------|----------|----------|----------|----------|----------|----------|
| Arhgap18  | 0.241876 | 6.118822 | 2.359077 | 0.034049 | 0.202259 | -3.88949 |
| Pnpla2    | 0.241713 | 11.5398  | 2.29571  | 0.038355 | 0.213216 | -3.99718 |
| Zc3h13    | 0.241536 | 5.751302 | 2.505695 | 0.025782 | 0.177303 | -3.63615 |
| Gm8884    | 0.241389 | 3.317797 | 2.770749 | 0.015485 | 0.138522 | -3.16616 |
| Olfir847  | 0.24128  | 3.251011 | 2.173596 | 0.048142 | 0.238886 | -4.2012  |
| Rps15a-ps | 0.241184 | 3.278551 | 2.557205 | 0.023365 | 0.169692 | -3.5459  |
| Fxyd1     | 0.241116 | 11.18859 | 2.888159 | 0.012329 | 0.1227   | -2.95422 |
| Ak3       | 0.241021 | 9.484117 | 2.678839 | 0.018495 | 0.151298 | -3.33062 |
| Olfir15   | 0.240699 | 3.608468 | 3.787177 | 0.002138 | 0.054522 | -1.30223 |
| 4632427E1 | 0.24056  | 7.480469 | 2.290925 | 0.0387   | 0.214464 | -4.00526 |
| Tmem140   | 0.240411 | 5.677985 | 2.71295  | 0.017316 | 0.146523 | -3.26975 |
| 4933428C1 | 0.240343 | 3.294651 | 2.956694 | 0.010789 | 0.115863 | -2.82971 |
| Whsc1     | 0.240268 | 5.472673 | 3.579595 | 0.003199 | 0.065756 | -1.68437 |
| Chic1     | 0.240248 | 3.743903 | 2.481536 | 0.026997 | 0.181935 | -3.67826 |
| Dcaf17    | 0.240228 | 5.214027 | 2.555322 | 0.023449 | 0.170065 | -3.54921 |
| Mllt3     | 0.240187 | 6.620256 | 2.231261 | 0.043259 | 0.227315 | -4.10546 |
| Aoah      | 0.240102 | 4.075862 | 2.188808 | 0.046806 | 0.23567  | -4.17606 |
| Ptprb     | 0.240017 | 9.112196 | 2.849771 | 0.013284 | 0.128301 | -3.02372 |
| LOC100862 | 0.239963 | 3.985948 | 2.933051 | 0.011298 | 0.118708 | -2.87272 |
| Tmem132c  | 0.239938 | 3.324559 | 2.662454 | 0.019088 | 0.15365  | -3.35979 |
| Lonrf3    | 0.239902 | 3.819577 | 2.46422  | 0.027902 | 0.184824 | -3.70836 |
| Mkrn2os   | 0.239868 | 4.049703 | 2.589913 | 0.021945 | 0.163963 | -3.4883  |
| Gpr89     | 0.239855 | 6.188449 | 2.704458 | 0.017603 | 0.147342 | -3.28492 |
| BC065397  | 0.239838 | 4.086878 | 2.162054 | 0.049179 | 0.24119  | -4.22023 |
| Mrps12    | 0.239773 | 7.233819 | 2.325276 | 0.036285 | 0.208037 | -3.94708 |
| 4930528D0 | 0.239641 | 3.811552 | 2.545414 | 0.023898 | 0.171362 | -3.56661 |
| Pcdhga10  | 0.239563 | 6.886546 | 2.389515 | 0.032148 | 0.197284 | -3.83736 |
| Snrnp200  | 0.239502 | 8.069946 | 2.778818 | 0.015245 | 0.137673 | -3.15166 |
| Cry1      | 0.239482 | 5.069611 | 2.226373 | 0.043654 | 0.227968 | -4.11362 |
| Mir146b   | 0.239407 | 3.785801 | 2.385969 | 0.032364 | 0.197829 | -3.84344 |
| Npepl1    | 0.239237 | 7.924957 | 2.24979  | 0.041792 | 0.22298  | -4.07446 |
| Gm26641   | 0.239221 | 3.79238  | 3.039464 | 0.009181 | 0.108196 | -2.67868 |
| Ppan      | 0.239075 | 4.133046 | 2.569149 | 0.022837 | 0.167271 | -3.5249  |
| Lrrd1     | 0.239051 | 3.365456 | 2.465081 | 0.027856 | 0.184701 | -3.70687 |
| Gareml    | 0.239037 | 3.903943 | 3.026626 | 0.009414 | 0.109107 | -2.70215 |
| Cml1      | 0.238868 | 3.533008 | 2.362965 | 0.0338   | 0.201694 | -3.88285 |
| Csf2      | 0.238853 | 3.155234 | 3.565827 | 0.003285 | 0.066241 | -1.70976 |
| 2010107E0 | 0.238729 | 10.76031 | 2.932778 | 0.011304 | 0.118721 | -2.87322 |
| Gm14902   | 0.238519 | 3.820757 | 2.260522 | 0.040963 | 0.220997 | -4.05646 |
| Apol6     | 0.238466 | 3.621837 | 2.551614 | 0.023617 | 0.170472 | -3.55573 |
| 4933413J0 | 0.238407 | 3.61253  | 3.027835 | 0.009392 | 0.108962 | -2.69994 |
| Rnf38     | 0.238295 | 6.451341 | 2.707072 | 0.017514 | 0.147294 | -3.28025 |
| 2310009AC | 0.238274 | 4.672848 | 2.196064 | 0.046181 | 0.234107 | -4.16403 |
| Snora21   | 0.238173 | 9.597928 | 2.534799 | 0.024388 | 0.17274  | -3.58523 |
| Gm10046   | 0.238122 | 3.600099 | 2.78867  | 0.014956 | 0.136388 | -3.13394 |
| Pcdhb17   | 0.23781  | 4.373137 | 2.658253 | 0.019243 | 0.154199 | -3.36726 |
| Kdm4d     | 0.237783 | 3.629064 | 3.177081 | 0.007017 | 0.094656 | -2.42637 |
| Gnai1     | 0.237644 | 4.856778 | 2.958222 | 0.010757 | 0.115719 | -2.82692 |



|           |          |          |          |          |          |          |
|-----------|----------|----------|----------|----------|----------|----------|
| Olfir823  | 0.237586 | 3.219786 | 3.42884  | 0.004291 | 0.075071 | -1.9625  |
| Tbc1d22b  | 0.237467 | 6.137451 | 3.359693 | 0.004911 | 0.079749 | -2.09006 |
| Glyr1     | 0.237434 | 7.688215 | 2.31072  | 0.037291 | 0.210788 | -3.97178 |
| Ugp2      | 0.237305 | 10.04834 | 2.919505 | 0.0116   | 0.11989  | -2.89734 |
| Nbas      | 0.237115 | 5.928942 | 2.339539 | 0.035325 | 0.205554 | -3.92282 |
| Syne3     | 0.236986 | 4.218591 | 2.196312 | 0.04616  | 0.234095 | -4.16362 |
| Sdhaf1    | 0.236938 | 6.386698 | 2.157447 | 0.049599 | 0.242198 | -4.22781 |
| Gm5801    | 0.23681  | 4.333411 | 2.183135 | 0.0473   | 0.236834 | -4.18544 |
| Olfir1441 | 0.236769 | 3.822079 | 2.895293 | 0.012159 | 0.121746 | -2.94129 |
| Phf11a    | 0.236762 | 4.665744 | 2.208005 | 0.04517  | 0.231148 | -4.14421 |
| Ube2dnl2  | 0.236699 | 3.066185 | 3.82225  | 0.001998 | 0.052809 | -1.23784 |
| Slc36a4   | 0.236565 | 5.296017 | 2.215372 | 0.044556 | 0.229533 | -4.13195 |
| Snora78   | 0.23645  | 4.225972 | 2.817415 | 0.014146 | 0.132801 | -3.08215 |
| 5830444BC | 0.236332 | 3.694093 | 3.19969  | 0.006714 | 0.092728 | -2.3848  |
| Hsbp1l1   | 0.236131 | 3.668521 | 2.520113 | 0.025083 | 0.175323 | -3.61095 |
| Npb       | 0.236108 | 3.743054 | 2.267639 | 0.040423 | 0.219295 | -4.0445  |
| Snx7      | 0.23605  | 5.96617  | 2.38212  | 0.0326   | 0.198536 | -3.85005 |
| Bcl3      | 0.236043 | 5.136414 | 2.54935  | 0.023719 | 0.170915 | -3.5597  |
| Usp8      | 0.235928 | 7.617801 | 2.979809 | 0.010314 | 0.113556 | -2.7876  |
| Clec2e    | 0.235806 | 3.780908 | 2.36929  | 0.033399 | 0.200602 | -3.87203 |
| Maml3     | 0.235372 | 4.648448 | 2.218895 | 0.044265 | 0.229126 | -4.12609 |
| Ears2     | 0.235297 | 4.844048 | 3.522205 | 0.003577 | 0.068153 | -1.79023 |
| Prdx1     | 0.235291 | 7.897756 | 2.424572 | 0.030084 | 0.19235  | -3.777   |
| Olfir308  | 0.235284 | 3.650113 | 2.611592 | 0.021051 | 0.161233 | -3.45    |
| Sptssa    | 0.235229 | 5.346781 | 2.586323 | 0.022097 | 0.164597 | -3.49464 |
| Igkv2-109 | 0.235153 | 3.368716 | 3.685797 | 0.002602 | 0.059838 | -1.48867 |
| Tyw5      | 0.234914 | 4.058619 | 2.333729 | 0.035713 | 0.206463 | -3.93271 |
| 1700031A1 | 0.234909 | 3.432396 | 2.929832 | 0.011369 | 0.118952 | -2.87857 |
| Map3k13   | 0.234884 | 3.899913 | 2.215868 | 0.044515 | 0.229533 | -4.13113 |
| Nanos2    | 0.234816 | 3.784481 | 2.520325 | 0.025072 | 0.175323 | -3.61058 |
| Cabp4     | 0.234802 | 4.118459 | 2.870945 | 0.012749 | 0.125301 | -2.98541 |
| Bcr       | 0.234545 | 4.974531 | 2.689956 | 0.018102 | 0.149511 | -3.3108  |
| Plk4      | 0.234517 | 3.652985 | 3.397027 | 0.004566 | 0.077338 | -2.02119 |
| Bmp2      | 0.23445  | 3.939816 | 2.694857 | 0.017932 | 0.148696 | -3.30206 |
| Ebna1bp2  | 0.234436 | 5.599152 | 2.348785 | 0.034716 | 0.204026 | -3.90706 |
| Sh3gl1    | 0.234294 | 4.876912 | 2.594311 | 0.021761 | 0.163437 | -3.48054 |
| Mir29b-1  | 0.234289 | 3.021034 | 2.342989 | 0.035096 | 0.205016 | -3.91694 |
| Sptlc2    | 0.234165 | 8.504452 | 2.528793 | 0.02467  | 0.173837 | -3.59575 |
| Gm12100   | 0.234109 | 3.081166 | 2.973227 | 0.010447 | 0.114162 | -2.79959 |
| Mir1930   | 0.234066 | 3.667408 | 2.534447 | 0.024405 | 0.17274  | -3.58585 |
| Cep350    | 0.234009 | 7.602356 | 2.826702 | 0.013893 | 0.131622 | -3.06539 |
| Olfir314  | 0.233955 | 3.695753 | 2.902787 | 0.011983 | 0.121077 | -2.92769 |
| Bcl7a     | 0.233771 | 6.529483 | 2.516684 | 0.025247 | 0.175619 | -3.61694 |
| Cyp2c70   | 0.233746 | 3.421316 | 2.640331 | 0.019919 | 0.156691 | -3.39909 |
| Fermt2    | 0.233704 | 8.874013 | 2.739313 | 0.016456 | 0.142693 | -3.22257 |
| Slc9a4    | 0.233673 | 3.494603 | 2.451914 | 0.028562 | 0.187104 | -3.72971 |
| Mss51     | 0.233653 | 3.760707 | 2.470742 | 0.027558 | 0.183572 | -3.69703 |
| 2610020HC | 0.233605 | 3.758811 | 2.47952  | 0.027101 | 0.182091 | -3.68177 |

|           |          |          |          |          |          |          |
|-----------|----------|----------|----------|----------|----------|----------|
| Gphn      | 0.233459 | 7.875356 | 2.918768 | 0.011616 | 0.11989  | -2.89868 |
| Mir681    | 0.233398 | 3.310059 | 2.699549 | 0.01777  | 0.147997 | -3.29369 |
| Ms4a1     | 0.233393 | 3.397051 | 3.128117 | 0.007722 | 0.098798 | -2.51629 |
| Hsd17b3   | 0.233354 | 3.697895 | 3.664032 | 0.002714 | 0.061231 | -1.52875 |
| Dhx58     | 0.23329  | 3.889838 | 2.686322 | 0.01823  | 0.150104 | -3.31728 |
| Nhlrc1    | 0.23327  | 4.396908 | 2.904549 | 0.011942 | 0.120931 | -2.92449 |
| Maged1    | 0.233025 | 8.438778 | 2.987617 | 0.010158 | 0.112746 | -2.77336 |
| Htr7      | 0.233012 | 3.597056 | 2.566764 | 0.022941 | 0.167593 | -3.52909 |
| Sec24a    | 0.232937 | 7.35003  | 3.033901 | 0.009281 | 0.108479 | -2.68885 |
| Npr2      | 0.232931 | 7.369558 | 2.326415 | 0.036208 | 0.207736 | -3.94514 |
| Il34      | 0.232764 | 4.554696 | 2.7648   | 0.015664 | 0.138977 | -3.17685 |
| Tbp       | 0.2327   | 6.136695 | 3.168429 | 0.007137 | 0.09532  | -2.44227 |
| Gpr21     | 0.232459 | 4.087747 | 2.376935 | 0.032921 | 0.199176 | -3.85893 |
| Gpx2      | 0.232346 | 3.303998 | 2.58981  | 0.02195  | 0.163963 | -3.48848 |
| Slc25a23  | 0.232178 | 8.33842  | 3.111075 | 0.007983 | 0.101042 | -2.54755 |
| Dennd2a   | 0.232123 | 4.650241 | 2.215094 | 0.044579 | 0.229533 | -4.13242 |
| Rptoros   | 0.232062 | 3.996972 | 2.730689 | 0.016733 | 0.143888 | -3.23801 |
| Mst1r     | 0.231971 | 4.24595  | 2.748182 | 0.016176 | 0.1414   | -3.20667 |
| Gm19950   | 0.231934 | 3.567627 | 2.825182 | 0.013934 | 0.13171  | -3.06814 |
| Ddx3y     | 0.231866 | 8.901415 | 3.200232 | 0.006707 | 0.092682 | -2.38381 |
| C730036E1 | 0.231686 | 4.364866 | 2.229317 | 0.043416 | 0.227657 | -4.10871 |
| Ash2l     | 0.231547 | 6.96815  | 2.736653 | 0.016541 | 0.14298  | -3.22733 |
| 3110002H1 | 0.231194 | 6.810584 | 2.582752 | 0.022249 | 0.165254 | -3.50093 |
| Gtpbp3    | 0.231049 | 4.407516 | 2.734203 | 0.01662  | 0.14331  | -3.23172 |
| Olfr24    | 0.231038 | 3.33256  | 2.264482 | 0.040662 | 0.220085 | -4.04981 |
| Gm30289   | 0.230954 | 4.639728 | 2.297687 | 0.038213 | 0.21282  | -3.99384 |
| Aplp2     | 0.230943 | 10.02335 | 2.686347 | 0.018229 | 0.150104 | -3.31724 |
| Oas1f     | 0.23094  | 3.583488 | 2.509299 | 0.025606 | 0.176732 | -3.62985 |
| Eral1     | 0.230937 | 7.207428 | 2.533939 | 0.024429 | 0.172822 | -3.58674 |
| Ndufa12   | 0.230889 | 11.61186 | 3.477889 | 0.003899 | 0.071348 | -1.87199 |
| Mirlet7g  | 0.230787 | 3.404456 | 2.203164 | 0.045577 | 0.232277 | -4.15225 |
| Ighv7-3   | 0.230403 | 3.223111 | 2.195383 | 0.046239 | 0.234242 | -4.16516 |
| Exoc1     | 0.230225 | 6.084513 | 2.167835 | 0.048657 | 0.239939 | -4.21071 |
| Zfp560    | 0.230218 | 3.753944 | 2.837321 | 0.013609 | 0.130077 | -3.04622 |
| Gm10369   | 0.230187 | 3.994651 | 2.16649  | 0.048778 | 0.240187 | -4.21292 |
| Wisp3     | 0.230167 | 3.860608 | 2.521108 | 0.025035 | 0.175266 | -3.60921 |
| C1rl      | 0.230035 | 4.668566 | 2.799441 | 0.014647 | 0.134615 | -3.11454 |
| Adgrg2    | 0.22993  | 3.78863  | 2.391296 | 0.03204  | 0.197156 | -3.8343  |
| Ppp1r32   | 0.229913 | 3.721727 | 2.281911 | 0.039359 | 0.216376 | -4.02047 |
| D130020LC | 0.229913 | 3.65288  | 4.013151 | 0.001383 | 0.044029 | -0.88865 |
| Olfr1284  | 0.229733 | 3.303262 | 3.008106 | 0.00976  | 0.11113  | -2.73597 |
| Dhx34     | 0.22973  | 5.031857 | 2.631457 | 0.020262 | 0.158157 | -3.41483 |
| Vps13b    | 0.22973  | 6.77909  | 2.89384  | 0.012194 | 0.121839 | -2.94392 |
| Usp43     | 0.229702 | 4.406355 | 2.66235  | 0.019092 | 0.15365  | -3.35997 |
| 0610038B2 | 0.229635 | 4.263418 | 2.311895 | 0.037208 | 0.210514 | -3.96979 |
| LOC102638 | 0.22957  | 3.642861 | 2.788999 | 0.014947 | 0.136388 | -3.13334 |
| Kat2a     | 0.229506 | 5.337735 | 2.77174  | 0.015455 | 0.138356 | -3.16438 |
| Gchfr     | 0.22938  | 4.099553 | 2.314623 | 0.037018 | 0.210327 | -3.96516 |

|           |          |          |          |          |          |          |
|-----------|----------|----------|----------|----------|----------|----------|
| Mcm3ap    | 0.229238 | 4.894079 | 2.773874 | 0.015391 | 0.138105 | -3.16054 |
| Upk2      | 0.229234 | 4.433953 | 2.409589 | 0.03095  | 0.194856 | -3.80284 |
| Nploc4    | 0.229112 | 9.926405 | 2.437479 | 0.029356 | 0.189951 | -3.7547  |
| Adcyap1r1 | 0.228926 | 4.660524 | 2.650119 | 0.019547 | 0.155006 | -3.38171 |
| Myo1a     | 0.228831 | 3.674067 | 3.03745  | 0.009217 | 0.108303 | -2.68237 |
| Slc27a2   | 0.228553 | 3.404153 | 2.252064 | 0.041615 | 0.222388 | -4.07065 |
| Mir129-2  | 0.228536 | 3.150726 | 2.299769 | 0.038064 | 0.212616 | -3.99032 |
| Ube2d1    | 0.228455 | 8.83493  | 2.170817 | 0.04839  | 0.23956  | -4.20579 |
| Sec24c    | 0.228014 | 7.947503 | 2.711867 | 0.017353 | 0.146631 | -3.27168 |
| 1600002KC | 0.227997 | 4.136622 | 2.534975 | 0.02438  | 0.17274  | -3.58492 |
| Ube2j1    | 0.22798  | 7.582577 | 3.274069 | 0.005806 | 0.086535 | -2.2479  |
| Tmem169   | 0.227929 | 3.850944 | 2.675408 | 0.018618 | 0.152048 | -3.33673 |
| Ccr1      | 0.227905 | 3.493917 | 2.760143 | 0.015806 | 0.139786 | -3.18521 |
| Tsen34    | 0.227797 | 5.164842 | 2.222854 | 0.043941 | 0.228486 | -4.11949 |
| Lypd6b    | 0.227709 | 3.490726 | 2.531486 | 0.024543 | 0.173365 | -3.59104 |
| Gm16897   | 0.227668 | 3.529443 | 2.959173 | 0.010737 | 0.115604 | -2.82519 |
| Def6      | 0.227525 | 3.880202 | 2.264036 | 0.040696 | 0.220202 | -4.05056 |
| Rab24     | 0.227451 | 7.537065 | 2.579127 | 0.022404 | 0.165796 | -3.50732 |
| Dmtf1     | 0.227302 | 6.203495 | 2.365314 | 0.033651 | 0.201435 | -3.87883 |
| Lats2     | 0.227119 | 6.047479 | 2.204036 | 0.045504 | 0.232045 | -4.1508  |
| Fau       | 0.227    | 3.984268 | 2.506097 | 0.025763 | 0.17724  | -3.63544 |
| 4933422AC | 0.22682  | 3.254605 | 3.356054 | 0.004946 | 0.080161 | -2.09677 |
| Crhbp     | 0.226727 | 3.580567 | 2.209366 | 0.045056 | 0.230792 | -4.14194 |
| Ndrp4     | 0.226583 | 7.764659 | 2.161383 | 0.04924  | 0.241346 | -4.22133 |
| Abcc4     | 0.226508 | 5.444472 | 2.626788 | 0.020445 | 0.158815 | -3.4231  |
| Clpb      | 0.226488 | 7.461714 | 2.31795  | 0.036788 | 0.209518 | -3.95952 |
| Phax      | 0.226345 | 4.894097 | 2.777804 | 0.015275 | 0.137678 | -3.15348 |
| Gm6657    | 0.226206 | 3.388412 | 2.726962 | 0.016854 | 0.144428 | -3.24468 |
| Zfp773    | 0.22619  | 3.453671 | 2.56127  | 0.023184 | 0.168786 | -3.53876 |
| Rrm2      | 0.226122 | 4.189721 | 2.814965 | 0.014213 | 0.132996 | -3.08657 |
| Sytl3     | 0.226054 | 3.836334 | 2.374305 | 0.033085 | 0.199633 | -3.86344 |
| BC037032  | 0.226017 | 4.616426 | 2.461256 | 0.02806  | 0.185424 | -3.71351 |
| Gpr19     | 0.225993 | 3.953573 | 2.910757 | 0.011799 | 0.120438 | -2.91322 |
| Fbxw24    | 0.225871 | 3.115865 | 2.999229 | 0.009931 | 0.112219 | -2.75218 |
| 2210409E1 | 0.225801 | 3.317897 | 2.723078 | 0.016981 | 0.144917 | -3.25163 |
| Lats1     | 0.225789 | 5.944763 | 2.154649 | 0.049856 | 0.243069 | -4.23241 |
| Il10      | 0.22574  | 3.3776   | 3.473925 | 0.00393  | 0.071617 | -1.87931 |
| Sult2a5   | 0.225708 | 3.431295 | 3.759835 | 0.002254 | 0.05598  | -1.35247 |
| Riid1     | 0.225593 | 3.783532 | 2.17151  | 0.048328 | 0.239329 | -4.20465 |
| LOC10263  | 0.225545 | 4.08551  | 3.175886 | 0.007034 | 0.094671 | -2.42856 |
| Nr6a1     | 0.225077 | 3.680247 | 2.570251 | 0.022789 | 0.167264 | -3.52296 |
| Zfp316    | 0.225009 | 3.873572 | 2.41847  | 0.030434 | 0.193269 | -3.78753 |
| Pnliprp1  | 0.224721 | 3.61879  | 2.901604 | 0.012011 | 0.121193 | -2.92984 |
| Kbtbd3    | 0.224664 | 4.020209 | 2.214556 | 0.044624 | 0.229611 | -4.13331 |
| Zdhhc22   | 0.224575 | 3.908186 | 2.447543 | 0.028801 | 0.18807  | -3.73728 |
| Ttc39c    | 0.224518 | 4.53804  | 3.030053 | 0.009351 | 0.108872 | -2.69589 |
| Alg9      | 0.224433 | 5.316644 | 2.734449 | 0.016612 | 0.14331  | -3.23128 |
| 2310039L1 | 0.224419 | 4.051663 | 2.488491 | 0.026642 | 0.18042  | -3.66615 |

|            |          |          |          |          |          |          |
|------------|----------|----------|----------|----------|----------|----------|
| 1700047M   | 0.224338 | 3.542508 | 2.912378 | 0.011762 | 0.120438 | -2.91028 |
| Sash3      | 0.224155 | 3.846127 | 2.731925 | 0.016693 | 0.143696 | -3.2358  |
| Mt1        | 0.224108 | 11.51765 | 2.255586 | 0.041343 | 0.221709 | -4.06475 |
| 4930423M   | 0.224036 | 3.235309 | 2.250029 | 0.041773 | 0.222946 | -4.07406 |
| 2010003K1  | 0.223911 | 4.271298 | 2.47938  | 0.027109 | 0.182091 | -3.68201 |
| Faxc       | 0.223694 | 3.563751 | 2.407691 | 0.031061 | 0.195153 | -3.8061  |
| N4bp2l1    | 0.223663 | 4.394709 | 3.47075  | 0.003954 | 0.071804 | -1.88517 |
| Nck2       | 0.223592 | 5.54067  | 2.207515 | 0.045211 | 0.231216 | -4.14502 |
| Nbr1       | 0.223443 | 8.64525  | 2.227326 | 0.043577 | 0.227889 | -4.11203 |
| Ap1g2      | 0.223314 | 4.76807  | 2.922243 | 0.011538 | 0.119765 | -2.89236 |
| Hoxc8      | 0.223243 | 3.690886 | 2.777335 | 0.015289 | 0.137678 | -3.15432 |
| Mir325     | 0.223199 | 3.504422 | 2.312027 | 0.037199 | 0.21051  | -3.96956 |
| Gm15895    | 0.223134 | 3.54866  | 2.179903 | 0.047584 | 0.237376 | -4.19079 |
| Man1b1     | 0.223114 | 4.713282 | 2.887531 | 0.012344 | 0.122737 | -2.95536 |
| Trav18     | 0.223036 | 3.66588  | 2.262106 | 0.040843 | 0.220631 | -4.0538  |
| AA543186   | 0.223036 | 3.970242 | 2.237182 | 0.042785 | 0.226334 | -4.09557 |
| Rnf214     | 0.223029 | 6.895532 | 3.569425 | 0.003262 | 0.066221 | -1.70312 |
| Smim24     | 0.222934 | 4.275855 | 2.302852 | 0.037845 | 0.212307 | -3.9851  |
| Adam23     | 0.222887 | 4.024773 | 3.051015 | 0.008977 | 0.106942 | -2.65756 |
| Arhgef18   | 0.22286  | 6.076111 | 3.430607 | 0.004276 | 0.074971 | -1.95924 |
| Elmo2      | 0.222812 | 6.067786 | 3.057247 | 0.008868 | 0.10645  | -2.64616 |
| Gm7160     | 0.222748 | 4.40711  | 3.007501 | 0.009772 | 0.11113  | -2.73708 |
| Ropn1l     | 0.222694 | 3.445657 | 2.327743 | 0.036117 | 0.207506 | -3.94289 |
| Gm6654     | 0.222466 | 3.662014 | 4.050775 | 0.001287 | 0.042721 | -0.82014 |
| Cntnap5b   | 0.222443 | 3.378881 | 2.189676 | 0.046731 | 0.235597 | -4.17462 |
| Ptpn22     | 0.222293 | 3.728253 | 2.704016 | 0.017618 | 0.147418 | -3.28571 |
| Ccne1      | 0.22228  | 4.087133 | 2.3311   | 0.03589  | 0.206965 | -3.93718 |
| Zswim8     | 0.222154 | 5.827711 | 2.48739  | 0.026698 | 0.180701 | -3.66807 |
| Ythdf2     | 0.222148 | 7.296458 | 2.966201 | 0.010591 | 0.114728 | -2.81239 |
| Zc3h4      | 0.222073 | 6.543979 | 2.236023 | 0.042878 | 0.22665  | -4.09751 |
| Tmem183a   | 0.222026 | 6.691742 | 2.185611 | 0.047084 | 0.236365 | -4.18135 |
| Sp8        | 0.22187  | 3.563409 | 2.539262 | 0.024181 | 0.172575 | -3.57741 |
| Tasp1      | 0.221802 | 5.162659 | 2.513192 | 0.025416 | 0.176286 | -3.62305 |
| Utp20      | 0.221768 | 4.862674 | 2.186964 | 0.046966 | 0.236017 | -4.17911 |
| Szt2       | 0.221636 | 4.751117 | 2.53917  | 0.024185 | 0.172575 | -3.57757 |
| Snhg11     | 0.221625 | 3.98565  | 3.137805 | 0.007577 | 0.098056 | -2.49851 |
| Trbv13-2   | 0.221385 | 3.315364 | 2.397798 | 0.031648 | 0.196427 | -3.82312 |
| Csgalnact1 | 0.221232 | 4.232198 | 2.771904 | 0.01545  | 0.138356 | -3.16408 |
| Appbp2     | 0.221178 | 8.009026 | 2.270634 | 0.040197 | 0.219001 | -4.03947 |
| Wdr13      | 0.221164 | 6.216702 | 2.298014 | 0.03819  | 0.21282  | -3.99329 |
| Spatc1l    | 0.221035 | 3.671553 | 3.008363 | 0.009756 | 0.11113  | -2.73551 |
| 6430562O   | 0.220866 | 5.015544 | 2.172862 | 0.048207 | 0.238969 | -4.20241 |
| Fam72a     | 0.220757 | 3.340929 | 2.282405 | 0.039322 | 0.216368 | -4.01964 |
| Mrpl20     | 0.220605 | 4.617627 | 2.909465 | 0.011829 | 0.120438 | -2.91557 |
| Gm20047    | 0.2205   | 3.439433 | 2.384354 | 0.032463 | 0.198141 | -3.84621 |
| Gm4651     | 0.2203   | 3.949668 | 2.302661 | 0.037858 | 0.212307 | -3.98543 |
| Ssh1       | 0.220106 | 5.372423 | 2.41775  | 0.030475 | 0.193269 | -3.78877 |
| Olfrc338   | 0.220076 | 3.183443 | 2.596623 | 0.021665 | 0.16313  | -3.47646 |

|           |          |          |          |          |          |          |
|-----------|----------|----------|----------|----------|----------|----------|
| Smg8      | 0.220059 | 4.125248 | 2.993656 | 0.010039 | 0.112245 | -2.76235 |
| Gm14041   | 0.220035 | 3.514477 | 2.542255 | 0.024043 | 0.172004 | -3.57216 |
| Ctcflos   | 0.219952 | 3.27827  | 2.610907 | 0.021078 | 0.161233 | -3.45122 |
| Mir17hg   | 0.219883 | 3.702145 | 2.660801 | 0.019149 | 0.153812 | -3.36273 |
| 4930503H1 | 0.219791 | 3.493115 | 2.473666 | 0.027405 | 0.182994 | -3.69195 |
| Tssc4     | 0.219659 | 4.21424  | 2.28009  | 0.039493 | 0.216875 | -4.02354 |
| Acpp      | 0.219581 | 3.540861 | 2.906967 | 0.011886 | 0.120686 | -2.92011 |
| Vgll1     | 0.219482 | 3.547729 | 3.500366 | 0.003732 | 0.069762 | -1.83052 |
| Nf1       | 0.219055 | 7.910634 | 3.288383 | 0.005646 | 0.085422 | -2.22152 |
| Ei24      | 0.219048 | 7.558417 | 2.228495 | 0.043482 | 0.227717 | -4.11008 |
| Rufy2     | 0.219001 | 5.266239 | 2.859909 | 0.013025 | 0.126784 | -3.00539 |
| Mir450-1  | 0.218884 | 3.261948 | 3.194714 | 0.00678  | 0.093116 | -2.39395 |
| Luzp1     | 0.218757 | 6.218102 | 2.336798 | 0.035508 | 0.206051 | -3.92749 |
| Arhgef25  | 0.218631 | 4.491803 | 3.344284 | 0.005061 | 0.080917 | -2.11848 |
| A230070EC | 0.218489 | 3.412793 | 3.085322 | 0.008395 | 0.103728 | -2.59475 |
| Ece2      | 0.218418 | 4.089922 | 2.782393 | 0.015139 | 0.13741  | -3.14523 |
| Olfr1062  | 0.218336 | 3.16589  | 2.946406 | 0.011008 | 0.116925 | -2.84843 |
| Srd5a1    | 0.218248 | 3.750807 | 2.611128 | 0.021069 | 0.161233 | -3.45082 |
| Chil5     | 0.218084 | 3.389966 | 2.984031 | 0.01023  | 0.113027 | -2.7799  |
| 1700026D1 | 0.218045 | 3.453342 | 2.428743 | 0.029847 | 0.191748 | -3.7698  |
| Gm13257   | 0.218011 | 3.722368 | 2.568927 | 0.022846 | 0.167293 | -3.52529 |
| Olfr1281  | 0.217968 | 3.110612 | 2.688617 | 0.018149 | 0.149762 | -3.31319 |
| Lzts3     | 0.217784 | 4.202316 | 2.865086 | 0.012895 | 0.125999 | -2.99602 |
| Mir141    | 0.217721 | 3.172093 | 3.02891  | 0.009372 | 0.108875 | -2.69798 |
| Fscn2     | 0.217702 | 3.601608 | 2.611189 | 0.021067 | 0.161233 | -3.45072 |
| Spdl1     | 0.217682 | 3.638463 | 2.322868 | 0.03645  | 0.208551 | -3.95117 |
| Oscar     | 0.217631 | 3.916107 | 2.354415 | 0.034349 | 0.202983 | -3.89745 |
| Gm15401   | 0.217567 | 3.645649 | 2.834137 | 0.013694 | 0.130565 | -3.05197 |
| Gm10654   | 0.217553 | 3.895072 | 2.710843 | 0.017387 | 0.146747 | -3.27351 |
| Rims3     | 0.217499 | 4.277044 | 2.974168 | 0.010428 | 0.114162 | -2.79788 |
| Aoc1      | 0.217406 | 3.48354  | 2.306338 | 0.037598 | 0.211853 | -3.9792  |
| Nat2      | 0.217211 | 3.809696 | 2.392801 | 0.031949 | 0.197039 | -3.83171 |
| Msh3      | 0.216804 | 5.450199 | 2.51429  | 0.025363 | 0.176026 | -3.62113 |
| Rnf24     | 0.216777 | 3.944082 | 2.390885 | 0.032065 | 0.19719  | -3.835   |
| Cntrl     | 0.216661 | 4.866957 | 2.818998 | 0.014102 | 0.132472 | -3.07929 |
| Fam120a   | 0.2166   | 8.653222 | 2.47909  | 0.027124 | 0.182142 | -3.68252 |
| Ttc39aos1 | 0.216512 | 4.314473 | 2.397625 | 0.031659 | 0.196427 | -3.82342 |
| Tpr       | 0.216458 | 8.960117 | 2.588114 | 0.022021 | 0.1643   | -3.49148 |
| Cyp2c38   | 0.21622  | 3.205441 | 2.333639 | 0.035719 | 0.206463 | -3.93286 |
| 4930554C2 | 0.21617  | 3.420992 | 3.558371 | 0.003333 | 0.066455 | -1.72351 |
| Mrm1      | 0.216159 | 4.859545 | 2.40346  | 0.031311 | 0.195882 | -3.81339 |
| Angptl6   | 0.216064 | 4.041056 | 2.218656 | 0.044285 | 0.229126 | -4.12649 |
| Vmn1r174  | 0.215729 | 3.315547 | 3.602851 | 0.003057 | 0.063948 | -1.64149 |
| Wt1       | 0.215542 | 4.726261 | 2.191303 | 0.04659  | 0.235174 | -4.17192 |
| Ankfy1    | 0.215535 | 6.958028 | 2.693894 | 0.017965 | 0.148725 | -3.30378 |
| Trmt10a   | 0.215064 | 3.896513 | 3.421674 | 0.004352 | 0.075672 | -1.97572 |
| Ncapg2    | 0.215057 | 3.69664  | 2.272946 | 0.040024 | 0.21844  | -4.03558 |
| Cep164    | 0.21504  | 4.497494 | 2.216641 | 0.044451 | 0.229408 | -4.12984 |

|           |          |          |          |          |          |          |
|-----------|----------|----------|----------|----------|----------|----------|
| 9130011E1 | 0.215013 | 6.440352 | 2.29836  | 0.038165 | 0.21282  | -3.9927  |
| Ptgs2     | 0.214996 | 4.055008 | 2.16219  | 0.049167 | 0.241178 | -4.22001 |
| Gm11696   | 0.214949 | 3.862439 | 2.392525 | 0.031965 | 0.197039 | -3.83219 |
| Dennd4c   | 0.214905 | 8.748728 | 2.375539 | 0.033008 | 0.199438 | -3.86133 |
| Npas4     | 0.214467 | 3.608617 | 2.923514 | 0.01151  | 0.119648 | -2.89005 |
| Gstcd     | 0.214464 | 3.653537 | 2.496272 | 0.02625  | 0.179203 | -3.65259 |
| Asf1a     | 0.214281 | 6.666874 | 2.285444 | 0.039099 | 0.215627 | -4.01451 |
| 9630013A2 | 0.214261 | 3.519402 | 2.282411 | 0.039322 | 0.216368 | -4.01963 |
| Klra2     | 0.214222 | 3.249445 | 2.796422 | 0.014733 | 0.135056 | -3.11998 |
| Mast3     | 0.214162 | 4.636052 | 2.517444 | 0.025211 | 0.175606 | -3.61561 |
| Rnf32     | 0.214081 | 3.412542 | 2.834741 | 0.013678 | 0.130529 | -3.05088 |
| Mkx       | 0.213982 | 3.574765 | 2.372258 | 0.033213 | 0.20026  | -3.86694 |
| Ncln      | 0.213589 | 6.815453 | 2.220675 | 0.044119 | 0.228938 | -4.12312 |
| Svs3b     | 0.21356  | 3.45997  | 2.305117 | 0.037685 | 0.212002 | -3.98127 |
| Kdm3b     | 0.21327  | 7.601915 | 2.518478 | 0.025161 | 0.175556 | -3.61381 |
| Gdnf      | 0.21323  | 3.574795 | 2.805469 | 0.014477 | 0.13377  | -3.10369 |
| Vmn2r23   | 0.213211 | 3.166827 | 2.40306  | 0.031335 | 0.195921 | -3.81408 |
| Zfp389    | 0.212724 | 3.564696 | 2.256949 | 0.041238 | 0.221534 | -4.06246 |
| Al854517  | 0.212701 | 3.544827 | 2.195175 | 0.046257 | 0.234242 | -4.16551 |
| Abi1      | 0.212226 | 7.711256 | 2.301856 | 0.037916 | 0.212389 | -3.98679 |
| Ccng1     | 0.212185 | 11.68845 | 2.550456 | 0.023669 | 0.170652 | -3.55776 |
| Ap1f      | 0.212019 | 4.220918 | 2.904621 | 0.011941 | 0.120931 | -2.92436 |
| Crot      | 0.211887 | 7.676907 | 2.376259 | 0.032963 | 0.199333 | -3.86009 |
| Ctsj      | 0.211838 | 3.211388 | 2.409539 | 0.030953 | 0.194856 | -3.80292 |
| Ulk4      | 0.211558 | 3.971583 | 2.940541 | 0.011134 | 0.117558 | -2.8591  |
| Casc1     | 0.211494 | 3.946648 | 2.234217 | 0.043022 | 0.226835 | -4.10052 |
| Mir199a-1 | 0.21146  | 3.742611 | 2.398669 | 0.031596 | 0.196396 | -3.82163 |
| Zbed5     | 0.211419 | 3.6936   | 2.187995 | 0.046876 | 0.23571  | -4.1774  |
| 9430007A2 | 0.211399 | 3.450914 | 2.971955 | 0.010473 | 0.114295 | -2.80191 |
| Cul4a     | 0.211249 | 8.348138 | 3.319993 | 0.005307 | 0.083    | -2.16326 |
| Lca5l     | 0.211161 | 3.774526 | 2.436771 | 0.029396 | 0.189988 | -3.75592 |
| Lrp3      | 0.211073 | 4.489326 | 2.779962 | 0.015211 | 0.137557 | -3.1496  |
| Btbd19    | 0.210812 | 3.885354 | 2.278952 | 0.039577 | 0.217001 | -4.02546 |
| Rrp15     | 0.210548 | 3.790007 | 2.40343  | 0.031313 | 0.195882 | -3.81344 |
| S1pr1     | 0.210476 | 8.222426 | 3.486998 | 0.003831 | 0.0707   | -1.85518 |
| Gm10030   | 0.210232 | 3.6891   | 2.694204 | 0.017955 | 0.148725 | -3.30323 |
| Txndc8    | 0.210141 | 3.877287 | 2.638173 | 0.020002 | 0.156933 | -3.40292 |
| 4930555AC | 0.210019 | 4.476591 | 2.51745  | 0.02521  | 0.175606 | -3.6156  |
| Olfr1040  | 0.209958 | 3.354572 | 2.530667 | 0.024582 | 0.173459 | -3.59247 |
| Magea10   | 0.209774 | 3.38337  | 3.525898 | 0.003551 | 0.068153 | -1.78341 |
| Il10ra    | 0.209751 | 4.398495 | 2.40939  | 0.030962 | 0.194862 | -3.80318 |
| Timm8a2   | 0.209646 | 4.264491 | 2.309794 | 0.037355 | 0.211058 | -3.97335 |
| Saxo1     | 0.209627 | 3.276607 | 2.241329 | 0.042456 | 0.225291 | -4.08863 |
| Gm16701   | 0.209269 | 3.314351 | 2.835701 | 0.013652 | 0.130386 | -3.04915 |
| Tmem253   | 0.209235 | 3.887658 | 2.664048 | 0.01903  | 0.153597 | -3.35695 |
| Got1      | 0.208998 | 12.34213 | 2.653776 | 0.01941  | 0.154807 | -3.37521 |
| Wdr26     | 0.208815 | 8.617428 | 2.705913 | 0.017553 | 0.147342 | -3.28232 |
| Mir18b    | 0.208767 | 3.166965 | 3.241119 | 0.006192 | 0.088874 | -2.30857 |

|            |          |          |          |          |          |          |
|------------|----------|----------|----------|----------|----------|----------|
| Lrba       | 0.20872  | 7.260935 | 2.731569 | 0.016704 | 0.143739 | -3.23644 |
| Gm16347    | 0.208683 | 3.186617 | 2.632809 | 0.020209 | 0.157939 | -3.41243 |
| Ccnl1      | 0.20851  | 6.329515 | 2.261228 | 0.04091  | 0.220849 | -4.05528 |
| Gsdmd      | 0.20851  | 4.898037 | 2.597481 | 0.021629 | 0.162938 | -3.47494 |
| Cercam     | 0.208452 | 4.078022 | 2.71046  | 0.0174   | 0.146747 | -3.2742  |
| Rbsn       | 0.208347 | 6.350267 | 2.272561 | 0.040053 | 0.21853  | -4.03622 |
| Zak        | 0.208313 | 8.028147 | 2.417963 | 0.030463 | 0.193269 | -3.7884  |
| Nme5       | 0.208266 | 3.869107 | 2.338926 | 0.035366 | 0.205563 | -3.92386 |
| Nmd3       | 0.208137 | 6.434309 | 2.168352 | 0.048611 | 0.239939 | -4.20985 |
| 493340710f | 0.208093 | 3.769167 | 2.332849 | 0.035772 | 0.206622 | -3.9342  |
| Nobox      | 0.207848 | 3.633872 | 2.371718 | 0.033247 | 0.200367 | -3.86787 |
| 170003401  | 0.207584 | 3.578971 | 2.46847  | 0.027677 | 0.184056 | -3.70098 |
| Slc9a1     | 0.20754  | 7.549571 | 2.940286 | 0.01114  | 0.117558 | -2.85956 |
| BB365896   | 0.207486 | 3.173893 | 2.247924 | 0.041937 | 0.223487 | -4.07759 |
| Erc5       | 0.207282 | 6.232222 | 2.4197   | 0.030363 | 0.193118 | -3.78541 |
| Kansl3     | 0.207262 | 7.690382 | 2.257554 | 0.041191 | 0.221401 | -4.06145 |
| 4932416HC  | 0.20714  | 4.254774 | 2.370565 | 0.033319 | 0.200415 | -3.86984 |
| Safb       | 0.207052 | 6.472341 | 3.306606 | 0.005448 | 0.083865 | -2.18794 |
| Arhgef7    | 0.207045 | 7.202155 | 2.955773 | 0.010809 | 0.115914 | -2.83138 |
| Gpr1       | 0.20697  | 3.5348   | 2.212987 | 0.044754 | 0.229968 | -4.13592 |
| Igkv4-63   | 0.206862 | 3.149899 | 2.722718 | 0.016993 | 0.144941 | -3.25228 |
| 543042701  | 0.206512 | 3.34992  | 3.483116 | 0.00386  | 0.070922 | -1.86235 |
| Tpp2       | 0.206482 | 7.703664 | 2.689057 | 0.018134 | 0.14972  | -3.31241 |
| Vmn1r215   | 0.206419 | 3.077331 | 2.319914 | 0.036652 | 0.209082 | -3.95618 |
| Fam19a5    | 0.206356 | 4.300607 | 2.620075 | 0.02071  | 0.159795 | -3.43499 |
| Adam2      | 0.206226 | 3.371017 | 2.858399 | 0.013064 | 0.126958 | -3.00812 |
| Mir688     | 0.206214 | 3.3916   | 2.776103 | 0.015325 | 0.137887 | -3.15654 |
| Defb21     | 0.206211 | 3.403398 | 3.07371  | 0.008588 | 0.104751 | -2.61602 |
| Ifitm10    | 0.206112 | 4.179065 | 2.416202 | 0.030565 | 0.193682 | -3.79144 |
| Pnoc       | 0.206021 | 3.851952 | 2.725791 | 0.016892 | 0.144507 | -3.24678 |
| Phyh       | 0.205919 | 9.999769 | 2.69859  | 0.017803 | 0.148124 | -3.2954  |
| H2-M2      | 0.205872 | 3.653554 | 3.726395 | 0.002405 | 0.057456 | -1.41396 |
| Rhot2      | 0.205648 | 7.999308 | 2.205417 | 0.045387 | 0.231736 | -4.14851 |
| Abcf3      | 0.205417 | 6.719896 | 2.43598  | 0.02944  | 0.190146 | -3.75729 |
| Ifna12     | 0.205234 | 3.612383 | 2.427118 | 0.029939 | 0.191974 | -3.77261 |
| Bcap29     | 0.205221 | 8.681061 | 2.381916 | 0.032613 | 0.198536 | -3.8504  |
| 1700048M   | 0.205217 | 3.772286 | 2.599336 | 0.021552 | 0.162659 | -3.47167 |
| Cep120     | 0.205193 | 7.226783 | 2.225354 | 0.043737 | 0.22809  | -4.11532 |
| Unc45bos   | 0.204939 | 3.653414 | 2.604892 | 0.021323 | 0.16206  | -3.46185 |
| Prr12      | 0.204671 | 5.949992 | 2.180535 | 0.047528 | 0.237359 | -4.18974 |
| Coro2a     | 0.204566 | 4.053374 | 2.207838 | 0.045184 | 0.231172 | -4.14449 |
| Fpr2       | 0.204356 | 3.331019 | 2.154187 | 0.049898 | 0.243133 | -4.23317 |
| Acot3      | 0.204268 | 4.016278 | 2.223368 | 0.043899 | 0.228426 | -4.11863 |
| Vmn2r72    | 0.204258 | 3.093258 | 2.371194 | 0.03328  | 0.200371 | -3.86877 |
| 1500012KC  | 0.204186 | 3.509238 | 2.32782  | 0.036112 | 0.207506 | -3.94276 |
| 12-Sep     | 0.204173 | 3.715205 | 3.035198 | 0.009258 | 0.108326 | -2.68648 |
| B130006DC  | 0.204149 | 4.14602  | 2.254186 | 0.041451 | 0.221843 | -4.06709 |
| Gria1      | 0.204122 | 3.755707 | 2.225124 | 0.043756 | 0.228098 | -4.1157  |

|           |          |          |          |          |          |          |
|-----------|----------|----------|----------|----------|----------|----------|
| Fam78b    | 0.203983 | 4.361269 | 2.401894 | 0.031404 | 0.196141 | -3.81608 |
| Ankzf1    | 0.203871 | 5.052619 | 2.362762 | 0.033813 | 0.201694 | -3.88319 |
| 4732419C1 | 0.203708 | 4.092414 | 2.250746 | 0.041717 | 0.222696 | -4.07286 |
| Tmem45a2  | 0.203525 | 3.378293 | 2.399071 | 0.031572 | 0.196396 | -3.82094 |
| Kcne4     | 0.203505 | 4.217963 | 2.494884 | 0.02632  | 0.179203 | -3.65501 |
| 9530051G  | 0.20324  | 4.076962 | 3.221218 | 0.006437 | 0.090568 | -2.3452  |
| Zc3hav1l  | 0.203172 | 3.970483 | 2.542884 | 0.024014 | 0.171851 | -3.57105 |
| Trhr      | 0.203145 | 3.331716 | 3.161081 | 0.00724  | 0.095842 | -2.45577 |
| Rab31     | 0.203105 | 6.623688 | 2.598073 | 0.021604 | 0.162901 | -3.4739  |
| Serinc2   | 0.203074 | 4.454402 | 2.206055 | 0.045333 | 0.231516 | -4.14745 |
| Trpv2     | 0.202898 | 4.176644 | 2.584952 | 0.022155 | 0.164828 | -3.49705 |
| Fbxw22    | 0.202894 | 3.458788 | 2.547944 | 0.023783 | 0.170986 | -3.56217 |
| Zfp862-ps | 0.202874 | 4.421261 | 2.33057  | 0.035926 | 0.206968 | -3.93808 |
| Fam227a   | 0.202799 | 4.072103 | 2.531361 | 0.024549 | 0.173365 | -3.59125 |
| Psma5     | 0.202582 | 3.536838 | 2.232731 | 0.043141 | 0.226982 | -4.10301 |
| Cep170b   | 0.202579 | 4.474011 | 2.603838 | 0.021367 | 0.162123 | -3.46371 |
| Gm17093   | 0.202566 | 3.53154  | 2.179835 | 0.04759  | 0.237376 | -4.1909  |
| Ripk1     | 0.202467 | 5.827633 | 3.169748 | 0.007119 | 0.09532  | -2.43984 |
| Olfr1180  | 0.202408 | 3.147021 | 2.69987  | 0.017759 | 0.147997 | -3.29311 |
| Hebp2     | 0.202393 | 3.55953  | 2.190073 | 0.046696 | 0.235519 | -4.17396 |
| Xrcc1     | 0.202237 | 5.251834 | 2.506026 | 0.025766 | 0.17724  | -3.63557 |
| Zfp618    | 0.202223 | 3.672563 | 2.922957 | 0.011522 | 0.119648 | -2.89107 |
| Krtap3-3  | 0.202167 | 3.320647 | 2.328836 | 0.036043 | 0.207319 | -3.94103 |
| Gm11186   | 0.201992 | 3.776777 | 2.315639 | 0.036948 | 0.210044 | -3.96344 |
| Trim6     | 0.201881 | 3.75068  | 2.42919  | 0.029821 | 0.191715 | -3.76903 |
| Crabp1    | 0.201772 | 3.712458 | 2.825266 | 0.013932 | 0.13171  | -3.06799 |
| Gk2       | 0.201758 | 3.285043 | 3.031338 | 0.009328 | 0.108819 | -2.69354 |
| Mir713    | 0.201697 | 3.476011 | 2.941843 | 0.011106 | 0.11753  | -2.85673 |
| Ptpn13    | 0.20166  | 4.092448 | 3.568066 | 0.003271 | 0.066221 | -1.70563 |
| Aox3      | 0.201643 | 3.753491 | 2.223324 | 0.043903 | 0.228426 | -4.11871 |
| Ttc27     | 0.201504 | 4.712568 | 2.642712 | 0.019828 | 0.156366 | -3.39486 |
| Cct3      | 0.20147  | 8.632311 | 2.354147 | 0.034367 | 0.202983 | -3.89791 |
| 2610306M  | 0.201447 | 4.198542 | 2.33101  | 0.035896 | 0.206965 | -3.93733 |
| Pcdhb15   | 0.201362 | 3.470635 | 2.662898 | 0.019072 | 0.153648 | -3.359   |
| Ambn      | 0.201145 | 3.514147 | 3.807339 | 0.002056 | 0.053574 | -1.2652  |
| Prmt6     | 0.20109  | 4.013713 | 2.291065 | 0.03869  | 0.214455 | -4.00503 |
| 1700074P1 | 0.200984 | 3.263334 | 2.66055  | 0.019158 | 0.153837 | -3.36317 |
| Zfp51     | 0.20095  | 3.030488 | 2.700109 | 0.017751 | 0.147997 | -3.29269 |
| Slc51a    | 0.200802 | 3.598448 | 2.825544 | 0.013924 | 0.13171  | -3.06748 |
| E430025E2 | 0.200738 | 7.98367  | 2.519973 | 0.025089 | 0.175323 | -3.61119 |
| Zfp523    | 0.20069  | 4.620202 | 2.578812 | 0.022418 | 0.165799 | -3.50788 |
| Srl       | 0.200656 | 10.79173 | 2.348113 | 0.03476  | 0.204166 | -3.90821 |
| Hmcn2     | 0.200372 | 4.875088 | 2.645799 | 0.01971  | 0.155803 | -3.38938 |
| 8430419L0 | 0.200189 | 3.904782 | 2.506895 | 0.025723 | 0.177192 | -3.63405 |
| Nup153    | 0.200175 | 7.352203 | 3.134675 | 0.007624 | 0.09819  | -2.50425 |
| Tsga10    | 0.200165 | 3.658676 | 2.955107 | 0.010823 | 0.115971 | -2.8326  |
| Cysltr2   | 0.200041 | 3.284591 | 2.91609  | 0.011677 | 0.120141 | -2.90354 |
| Platr10   | 0.199934 | 3.637321 | 2.229824 | 0.043375 | 0.227575 | -4.10786 |



|            |          |          |          |          |          |          |
|------------|----------|----------|----------|----------|----------|----------|
| Mir200c    | 0.199931 | 3.331004 | 2.523444 | 0.024923 | 0.174974 | -3.60512 |
| Atp6v1h    | 0.199748 | 5.313253 | 2.293474 | 0.038516 | 0.213871 | -4.00096 |
| Gbf1       | 0.199707 | 7.492106 | 2.981967 | 0.010271 | 0.113179 | -2.78366 |
| 25100390   | 0.199653 | 7.800184 | 2.180148 | 0.047562 | 0.237359 | -4.19038 |
| Gm26730    | 0.199385 | 3.735516 | 2.455404 | 0.028374 | 0.186765 | -3.72366 |
| Pfpl       | 0.199317 | 3.585498 | 2.229773 | 0.043379 | 0.227575 | -4.10795 |
| Zc3h11a    | 0.199185 | 7.989566 | 2.303268 | 0.037815 | 0.212306 | -3.9844  |
| Poc5       | 0.199066 | 4.850672 | 2.388734 | 0.032195 | 0.197419 | -3.8387  |
| Ppp1r15b   | 0.198853 | 6.323873 | 2.184821 | 0.047153 | 0.236477 | -4.18265 |
| Ptpn20     | 0.198636 | 3.355828 | 3.403256 | 0.004511 | 0.07686  | -2.0097  |
| Sec16a     | 0.198608 | 6.909526 | 2.818924 | 0.014104 | 0.132472 | -3.07943 |
| Ttl5       | 0.198588 | 5.831228 | 2.273028 | 0.040018 | 0.21844  | -4.03544 |
| Rnase12    | 0.198442 | 3.344582 | 2.686074 | 0.018239 | 0.150104 | -3.31773 |
| Kif16b     | 0.198398 | 7.942624 | 2.233386 | 0.043089 | 0.226909 | -4.10191 |
| Ndufs1     | 0.198337 | 10.91232 | 3.478959 | 0.003891 | 0.071332 | -1.87002 |
| Nemf       | 0.198215 | 6.835436 | 2.335312 | 0.035607 | 0.20629  | -3.93001 |
| Olfr1342   | 0.198188 | 3.398248 | 2.590329 | 0.021928 | 0.163948 | -3.48757 |
| Igkv4-57-1 | 0.198062 | 3.290437 | 2.228531 | 0.04348  | 0.227717 | -4.11002 |
| Trappc9    | 0.197747 | 5.67472  | 2.653605 | 0.019416 | 0.154808 | -3.37552 |
| Pstpip2    | 0.197734 | 8.825104 | 2.392184 | 0.031986 | 0.197039 | -3.83277 |
| Olfr145    | 0.197706 | 3.338355 | 2.21265  | 0.044782 | 0.229968 | -4.13648 |
| Nelfe      | 0.197435 | 4.886152 | 2.281942 | 0.039356 | 0.216376 | -4.02042 |
| Sycp1      | 0.197383 | 3.112851 | 2.931126 | 0.01134  | 0.118866 | -2.87622 |
| Coq9       | 0.197293 | 10.3978  | 3.165894 | 0.007172 | 0.095402 | -2.44692 |
| Gsta2      | 0.197216 | 3.028458 | 2.519957 | 0.02509  | 0.175323 | -3.61122 |
| Mir34a     | 0.197055 | 3.608293 | 2.53679  | 0.024296 | 0.17274  | -3.58174 |
| Cul1       | 0.196845 | 8.343214 | 2.454265 | 0.028435 | 0.186773 | -3.72563 |
| Chrng      | 0.196754 | 3.861967 | 2.665396 | 0.01898  | 0.153364 | -3.35455 |
| Gif        | 0.196645 | 3.691422 | 2.219387 | 0.044225 | 0.229096 | -4.12527 |
| Zfyve16    | 0.196493 | 5.82074  | 2.991267 | 0.010086 | 0.112391 | -2.7667  |
| Gm10415    | 0.196486 | 3.377947 | 3.590906 | 0.003129 | 0.06482  | -1.66351 |
| Mknk2      | 0.196438 | 9.758375 | 2.235334 | 0.042933 | 0.2267   | -4.09866 |
| Igkv6-32   | 0.196345 | 3.101916 | 2.284517 | 0.039167 | 0.215753 | -4.01608 |
| 4931406H2  | 0.196225 | 4.460743 | 2.475241 | 0.027323 | 0.182742 | -3.68921 |
| 4933417E1  | 0.196177 | 3.426132 | 2.437015 | 0.029382 | 0.189988 | -3.7555  |
| Trappc12   | 0.196126 | 6.34611  | 2.301408 | 0.037947 | 0.212405 | -3.98755 |
| Atxn2      | 0.196058 | 9.291063 | 2.442105 | 0.0291   | 0.189078 | -3.7467  |
| Crispld2   | 0.196011 | 7.248722 | 2.173591 | 0.048142 | 0.238886 | -4.20121 |
| Gm14719    | 0.195964 | 9.316732 | 2.179324 | 0.047635 | 0.237443 | -4.19174 |
| Pcdhb1     | 0.195906 | 3.523978 | 2.169399 | 0.048517 | 0.239881 | -4.20813 |
| Gm20492    | 0.195899 | 3.399219 | 2.552999 | 0.023554 | 0.170415 | -3.55329 |
| Cops2      | 0.195896 | 9.206346 | 2.289459 | 0.038806 | 0.214718 | -4.00774 |
| Pls1       | 0.195808 | 3.612796 | 3.017002 | 0.009593 | 0.110301 | -2.71973 |
| Spata13    | 0.195424 | 4.571996 | 2.351375 | 0.034547 | 0.203418 | -3.90264 |
| Cend1      | 0.195377 | 4.22806  | 2.357041 | 0.03418  | 0.202542 | -3.89297 |
| Prpf19     | 0.195265 | 8.924455 | 2.357444 | 0.034154 | 0.202496 | -3.89228 |
| Fndc9      | 0.195238 | 3.934696 | 2.536001 | 0.024333 | 0.17274  | -3.58312 |
| Tmem206    | 0.195214 | 4.474886 | 2.331664 | 0.035852 | 0.206938 | -3.93622 |

|           |          |          |          |          |          |          |
|-----------|----------|----------|----------|----------|----------|----------|
| Plch1     | 0.195038 | 3.481064 | 2.228318 | 0.043497 | 0.227744 | -4.11038 |
| Krt74     | 0.194917 | 3.51437  | 2.256554 | 0.041268 | 0.221534 | -4.06312 |
| Ubxn4     | 0.194763 | 8.444061 | 2.343246 | 0.035079 | 0.205001 | -3.9165  |
| Mbnl2     | 0.194499 | 10.19979 | 2.305302 | 0.037671 | 0.212002 | -3.98095 |
| 1700055D1 | 0.194255 | 4.13562  | 2.707591 | 0.017497 | 0.14724  | -3.27932 |
| Gm12066   | 0.194005 | 3.239093 | 2.387152 | 0.032292 | 0.197762 | -3.84141 |
| Olf1413   | 0.193956 | 3.313694 | 2.682125 | 0.018378 | 0.150586 | -3.32476 |
| Slc35g2   | 0.193804 | 3.984597 | 2.297737 | 0.038209 | 0.21282  | -3.99375 |
| Ii7       | 0.193622 | 3.272999 | 2.263931 | 0.040704 | 0.220202 | -4.05073 |
| Mocs2     | 0.193617 | 6.331346 | 2.328588 | 0.03606  | 0.207368 | -3.94145 |
| Aurka     | 0.193526 | 3.89022  | 2.474562 | 0.027358 | 0.182836 | -3.69039 |
| Igkv5-37  | 0.193495 | 3.144925 | 2.401778 | 0.031411 | 0.196141 | -3.81628 |
| Olf1018   | 0.193481 | 3.271464 | 3.027256 | 0.009403 | 0.109024 | -2.701   |
| Tmem211   | 0.193437 | 3.85152  | 2.814071 | 0.014238 | 0.133007 | -3.08818 |
| Gm12052   | 0.193271 | 3.412879 | 2.226099 | 0.043677 | 0.227968 | -4.11408 |
| Cdk7      | 0.19319  | 5.988196 | 2.329576 | 0.035993 | 0.207175 | -3.93977 |
| Col20a1   | 0.193153 | 4.180235 | 2.354206 | 0.034363 | 0.202983 | -3.89781 |
| Ccdc79    | 0.193149 | 3.232886 | 2.694072 | 0.017959 | 0.148725 | -3.30346 |
| Pdpr      | 0.192966 | 8.463345 | 2.492008 | 0.026464 | 0.179656 | -3.66002 |
| Haus1     | 0.192668 | 5.832011 | 2.921522 | 0.011554 | 0.119833 | -2.89367 |
| Gm19281   | 0.192488 | 3.542533 | 2.167112 | 0.048722 | 0.240009 | -4.2119  |
| Trim33    | 0.192478 | 5.658902 | 2.182112 | 0.04739  | 0.237082 | -4.18713 |
| Clvs1     | 0.191908 | 4.104743 | 2.370075 | 0.03335  | 0.200455 | -3.87068 |
| Mir711    | 0.19182  | 3.387658 | 2.297962 | 0.038193 | 0.21282  | -3.99337 |
| 3830417A1 | 0.191798 | 3.261426 | 2.407112 | 0.031095 | 0.195207 | -3.8071  |
| Fbxo38    | 0.191528 | 6.470439 | 2.199225 | 0.045911 | 0.233215 | -4.15879 |
| 4930452N1 | 0.191352 | 3.43731  | 2.617426 | 0.020816 | 0.160411 | -3.43968 |
| Bcl10     | 0.191277 | 5.795508 | 2.334605 | 0.035654 | 0.206402 | -3.93122 |
| Snord96a  | 0.191154 | 3.429154 | 2.157576 | 0.049587 | 0.242188 | -4.2276  |
| Olf133    | 0.191072 | 3.139563 | 2.534658 | 0.024395 | 0.17274  | -3.58548 |
| Rbpms2    | 0.190898 | 7.551503 | 2.934856 | 0.011258 | 0.118442 | -2.86944 |
| Rela      | 0.190891 | 8.767971 | 2.454236 | 0.028437 | 0.186773 | -3.72568 |
| 0610040J0 | 0.190796 | 3.966492 | 2.389642 | 0.03214  | 0.197284 | -3.83714 |
| Fam161a   | 0.19064  | 3.817895 | 2.967809 | 0.010558 | 0.114616 | -2.80947 |
| Trav20    | 0.190243 | 3.137195 | 2.605371 | 0.021304 | 0.162042 | -3.461   |
| Gm884     | 0.189931 | 3.349767 | 2.474594 | 0.027357 | 0.182836 | -3.69034 |
| 9030204HC | 0.18967  | 3.549588 | 2.670228 | 0.018804 | 0.152621 | -3.34595 |
| Hmbox1    | 0.189602 | 6.027581 | 2.263508 | 0.040736 | 0.220246 | -4.05145 |
| Dr1       | 0.189514 | 7.099314 | 2.402302 | 0.03138  | 0.196114 | -3.81538 |
| D430001F1 | 0.189511 | 3.663684 | 2.629986 | 0.020319 | 0.158301 | -3.41743 |
| Mastl     | 0.189056 | 3.617884 | 2.839224 | 0.013559 | 0.129797 | -3.04278 |
| Cdh3      | 0.189009 | 4.025006 | 2.57139  | 0.022739 | 0.166997 | -3.52095 |
| Piwil4    | 0.188768 | 3.591373 | 2.261327 | 0.040902 | 0.220849 | -4.05511 |
| Tefm      | 0.188751 | 4.214411 | 2.405372 | 0.031198 | 0.195604 | -3.8101  |
| Ptpmt1    | 0.188694 | 6.590441 | 2.598151 | 0.021601 | 0.162901 | -3.47376 |
| Gpr18     | 0.188443 | 3.616845 | 2.438478 | 0.029301 | 0.189789 | -3.75297 |
| Gpr141    | 0.18818  | 3.248468 | 2.567377 | 0.022914 | 0.167495 | -3.52801 |
| Prdm4     | 0.188022 | 5.814389 | 2.664832 | 0.019001 | 0.153465 | -3.35556 |

|            |          |          |          |          |          |          |
|------------|----------|----------|----------|----------|----------|----------|
| Vmn1r15    | 0.187919 | 3.189337 | 2.362854 | 0.033807 | 0.201694 | -3.88304 |
| Twf1       | 0.187873 | 7.441267 | 2.422539 | 0.0302   | 0.192505 | -3.78051 |
| Nlgn1      | 0.187846 | 3.353363 | 2.171571 | 0.048322 | 0.239329 | -4.20454 |
| Enpp3      | 0.187798 | 6.203274 | 2.27897  | 0.039576 | 0.217001 | -4.02543 |
| AV051173   | 0.187686 | 3.592704 | 2.891734 | 0.012244 | 0.122094 | -2.94774 |
| Uqcrc2     | 0.187636 | 11.6599  | 3.028283 | 0.009384 | 0.108958 | -2.69912 |
| Polb       | 0.187602 | 5.436412 | 2.301364 | 0.037951 | 0.212405 | -3.98762 |
| Rnf17      | 0.187473 | 3.32746  | 2.312264 | 0.037183 | 0.21051  | -3.96916 |
| Gm16068    | 0.187456 | 3.442442 | 2.328296 | 0.03608  | 0.207388 | -3.94195 |
| 4930435E1  | 0.187432 | 3.312466 | 2.340929 | 0.035233 | 0.20533  | -3.92045 |
| Mup-ps12   | 0.187398 | 3.036733 | 2.402274 | 0.031381 | 0.196114 | -3.81543 |
| Olfr954    | 0.187215 | 3.158793 | 2.390812 | 0.032069 | 0.19719  | -3.83513 |
| Cdc42bpb   | 0.18708  | 7.303175 | 2.567506 | 0.022909 | 0.167495 | -3.52779 |
| Brip1      | 0.186964 | 3.360735 | 3.236452 | 0.006249 | 0.089224 | -2.31716 |
| 5930422O   | 0.186754 | 3.455926 | 2.579694 | 0.02238  | 0.165796 | -3.50632 |
| Mia3       | 0.186462 | 7.29896  | 2.377168 | 0.032906 | 0.199137 | -3.85853 |
| Olfr172    | 0.186401 | 3.324809 | 2.826717 | 0.013892 | 0.131622 | -3.06537 |
| Lrrtm4     | 0.1864   | 3.484313 | 2.917707 | 0.01164  | 0.12004  | -2.9006  |
| Supt5      | 0.1863   | 7.970754 | 2.423799 | 0.030128 | 0.19235  | -3.77834 |
| Platr7     | 0.186179 | 3.460359 | 2.154351 | 0.049883 | 0.243108 | -4.2329  |
| Gm20356    | 0.185913 | 3.224792 | 2.33593  | 0.035566 | 0.206223 | -3.92896 |
| Haus4      | 0.185303 | 4.381063 | 2.407684 | 0.031062 | 0.195153 | -3.80612 |
| Rab11a     | 0.185282 | 8.046417 | 2.361301 | 0.033906 | 0.202007 | -3.88569 |
| Zfp780b    | 0.185201 | 4.38264  | 2.648941 | 0.019592 | 0.155308 | -3.3838  |
| A730013G   | 0.18514  | 3.80367  | 2.193755 | 0.046379 | 0.234491 | -4.16786 |
| A630075F1  | 0.185108 | 3.41189  | 2.299897 | 0.038055 | 0.212616 | -3.9901  |
| Prpsap2    | 0.185028 | 3.624496 | 2.386458 | 0.032334 | 0.197792 | -3.8426  |
| Gm13177    | 0.184574 | 3.29297  | 2.287286 | 0.038965 | 0.215162 | -4.01141 |
| Snx6       | 0.184496 | 7.280236 | 2.158717 | 0.049483 | 0.241916 | -4.22572 |
| Mir3473a   | 0.18447  | 3.077261 | 2.319517 | 0.03668  | 0.209142 | -3.95686 |
| C030007H   | 0.184418 | 3.619227 | 2.204839 | 0.045436 | 0.231794 | -4.14947 |
| Adm2       | 0.184167 | 3.768027 | 2.512957 | 0.025428 | 0.176286 | -3.62346 |
| Fabp6      | 0.184068 | 3.462802 | 2.751401 | 0.016076 | 0.140819 | -3.20089 |
| Gm15232    | 0.183792 | 3.283628 | 2.605279 | 0.021307 | 0.162042 | -3.46117 |
| Ppfia2     | 0.183753 | 3.88924  | 2.636681 | 0.020059 | 0.157162 | -3.40556 |
| 5930438M   | 0.183743 | 3.462802 | 2.350444 | 0.034607 | 0.20363  | -3.90423 |
| S100a1     | 0.183702 | 11.48573 | 2.223956 | 0.043851 | 0.228383 | -4.11765 |
| Eri2       | 0.183451 | 3.789561 | 2.360831 | 0.033937 | 0.202007 | -3.88649 |
| Gm15870    | 0.183072 | 3.365706 | 2.163297 | 0.049066 | 0.240828 | -4.21818 |
| Gpr75      | 0.182997 | 4.553575 | 2.329984 | 0.035966 | 0.207064 | -3.93908 |
| Abcb5      | 0.182797 | 3.352222 | 2.995872 | 0.009996 | 0.112245 | -2.7583  |
| Ldha       | 0.182644 | 10.91294 | 2.273445 | 0.039987 | 0.218332 | -4.03473 |
| Rab27b     | 0.182634 | 3.678475 | 2.499531 | 0.026087 | 0.178659 | -3.6469  |
| Mogs       | 0.181915 | 4.119848 | 2.407666 | 0.031063 | 0.195153 | -3.80615 |
| 181000811  | 0.181576 | 3.688282 | 2.977933 | 0.010352 | 0.11377  | -2.79102 |
| Igkv3-3    | 0.181544 | 3.024122 | 2.588641 | 0.021999 | 0.164232 | -3.49055 |
| Olfr1349   | 0.181381 | 3.357862 | 2.839534 | 0.013551 | 0.129769 | -3.04222 |
| Lrrc75aos1 | 0.181098 | 3.825005 | 2.526228 | 0.024791 | 0.174472 | -3.60024 |

|           |          |          |          |          |          |          |
|-----------|----------|----------|----------|----------|----------|----------|
| Mtfr2     | 0.181081 | 3.664841 | 2.179162 | 0.047649 | 0.237443 | -4.19201 |
| Trim5     | 0.181044 | 3.159044 | 2.359919 | 0.033995 | 0.202132 | -3.88805 |
| Podxl2    | 0.180759 | 4.079393 | 2.895035 | 0.012165 | 0.121746 | -2.94175 |
| Ints2     | 0.180528 | 3.851332 | 2.306592 | 0.03758  | 0.2118   | -3.97877 |
| Vmn2r86   | 0.180527 | 3.019463 | 2.256725 | 0.041255 | 0.221534 | -4.06284 |
| Stil      | 0.180427 | 3.531538 | 2.62668  | 0.020449 | 0.158815 | -3.42329 |
| Vmn2r44   | 0.180301 | 3.076886 | 2.455372 | 0.028375 | 0.186765 | -3.72371 |
| 2310015D2 | 0.18024  | 3.678662 | 2.395435 | 0.03179  | 0.196662 | -3.82719 |
| 1700001J1 | 0.180118 | 3.428601 | 2.43315  | 0.029598 | 0.190773 | -3.76218 |
| 1700018L0 | 0.179864 | 4.278734 | 2.463477 | 0.027941 | 0.18497  | -3.70965 |
| Olfr707   | 0.179838 | 3.104568 | 2.416084 | 0.030572 | 0.193682 | -3.79164 |
| Grk4      | 0.17981  | 3.581278 | 2.546163 | 0.023864 | 0.171255 | -3.5653  |
| Usp42     | 0.179755 | 6.750197 | 2.982909 | 0.010252 | 0.113121 | -2.78195 |
| Prc1      | 0.179586 | 3.436554 | 2.226094 | 0.043677 | 0.227968 | -4.11409 |
| Ndufa8    | 0.179131 | 11.8438  | 2.386929 | 0.032305 | 0.197762 | -3.8418  |
| Ivd       | 0.179064 | 10.39487 | 2.401471 | 0.031429 | 0.196141 | -3.81681 |
| Mpdz      | 0.179036 | 6.570638 | 2.279037 | 0.039571 | 0.217001 | -4.02532 |
| Psph      | 0.178945 | 4.192337 | 2.362987 | 0.033799 | 0.201694 | -3.88281 |
| Ttc23l    | 0.178858 | 3.415276 | 2.518017 | 0.025183 | 0.175556 | -3.61461 |
| Gm20611   | 0.178853 | 3.615387 | 2.473005 | 0.02744  | 0.183176 | -3.6931  |
| Brwd1     | 0.178799 | 7.187381 | 2.500568 | 0.026036 | 0.178503 | -3.64509 |
| Prmt8     | 0.178104 | 3.502219 | 2.497467 | 0.02619  | 0.179018 | -3.6505  |
| Mrpl18    | 0.177911 | 8.679776 | 2.261851 | 0.040862 | 0.220688 | -4.05423 |
| 1700016D0 | 0.177907 | 3.300217 | 3.059714 | 0.008825 | 0.106281 | -2.64164 |
| Ighv1-78  | 0.177821 | 3.036095 | 2.946278 | 0.011011 | 0.116925 | -2.84866 |
| Gm16116   | 0.177816 | 3.605591 | 2.219779 | 0.044193 | 0.229025 | -4.12461 |
| Plac8     | 0.177434 | 3.360039 | 2.63729  | 0.020036 | 0.157028 | -3.40448 |
| Pate4     | 0.177378 | 3.250148 | 2.280209 | 0.039484 | 0.216875 | -4.02334 |
| 4933424G0 | 0.176761 | 4.139487 | 2.367923 | 0.033486 | 0.200882 | -3.87437 |
| Serpina3j | 0.17676  | 3.390382 | 2.29861  | 0.038147 | 0.21282  | -3.99228 |
| Kcnq2     | 0.176497 | 3.648632 | 2.451997 | 0.028558 | 0.187104 | -3.72956 |
| Mrgprb1   | 0.176292 | 3.285167 | 2.711249 | 0.017373 | 0.146706 | -3.27279 |
| Trip12    | 0.176215 | 9.336806 | 2.909367 | 0.011831 | 0.120438 | -2.91575 |
| Gldc      | 0.176171 | 3.853385 | 2.182477 | 0.047358 | 0.237037 | -4.18653 |
| Stk33     | 0.176103 | 3.459064 | 2.489053 | 0.026614 | 0.180329 | -3.66517 |
| Plekha8   | 0.175768 | 4.542636 | 2.367941 | 0.033485 | 0.200882 | -3.87433 |
| Gm19665   | 0.17569  | 3.734166 | 2.254948 | 0.041392 | 0.221728 | -4.06582 |
| Stx1b     | 0.175686 | 3.728061 | 2.188206 | 0.046858 | 0.23567  | -4.17705 |
| Trav14n-3 | 0.175649 | 3.256363 | 2.468131 | 0.027695 | 0.184092 | -3.70157 |
| Trdv4     | 0.175564 | 3.21441  | 2.818887 | 0.014105 | 0.132472 | -3.0795  |
| Grm4      | 0.175401 | 3.757867 | 2.446319 | 0.028868 | 0.18831  | -3.7394  |
| Cdc23     | 0.175395 | 7.369761 | 2.256679 | 0.041258 | 0.221534 | -4.06291 |
| Nkx2-3    | 0.175323 | 3.558202 | 2.350483 | 0.034605 | 0.20363  | -3.90416 |
| Plxnb3    | 0.175249 | 3.960834 | 2.984079 | 0.010229 | 0.113027 | -2.77981 |
| Rbl1      | 0.175134 | 4.287762 | 2.174692 | 0.048044 | 0.238734 | -4.19939 |
| Samd4b    | 0.175123 | 6.20361  | 2.277323 | 0.039698 | 0.21727  | -4.0282  |
| Tsga13    | 0.175037 | 3.210484 | 2.890986 | 0.012262 | 0.122223 | -2.9491  |
| Gm20560   | 0.175032 | 3.230664 | 2.610989 | 0.021075 | 0.161233 | -3.45107 |

|           |          |          |          |          |          |          |
|-----------|----------|----------|----------|----------|----------|----------|
| Opn4      | 0.174883 | 4.117959 | 2.647791 | 0.019635 | 0.155454 | -3.38584 |
| Asxl1     | 0.17475  | 6.664198 | 2.589036 | 0.021982 | 0.164157 | -3.48985 |
| Gm9457    | 0.174613 | 3.129136 | 3.095544 | 0.008229 | 0.102741 | -2.57602 |
| Tpd52l2   | 0.174249 | 6.681037 | 2.424289 | 0.0301   | 0.19235  | -3.77749 |
| Fgl1      | 0.173757 | 3.328415 | 2.800475 | 0.014618 | 0.134544 | -3.11268 |
| Gm11264   | 0.173682 | 3.559253 | 2.4268   | 0.029957 | 0.192039 | -3.77315 |
| Mir19a    | 0.173591 | 3.125858 | 2.406189 | 0.03115  | 0.195453 | -3.80869 |
| Parvg     | 0.173204 | 3.927992 | 2.331463 | 0.035866 | 0.206965 | -3.93656 |
| Drd3      | 0.17314  | 3.867413 | 2.446822 | 0.02884  | 0.188278 | -3.73853 |
| Cadm1     | 0.172909 | 3.914498 | 2.787182 | 0.015    | 0.13664  | -3.13661 |
| 4930564DC | 0.172902 | 3.423691 | 2.258279 | 0.041135 | 0.221398 | -4.06023 |
| Olf1598   | 0.172716 | 3.109551 | 2.456499 | 0.028315 | 0.186563 | -3.72176 |
| Gm15104   | 0.172589 | 3.067007 | 2.318539 | 0.036747 | 0.209383 | -3.95852 |
| Hopxos    | 0.17238  | 3.317473 | 2.48879  | 0.026627 | 0.180367 | -3.66563 |
| Cyp4f39   | 0.172326 | 3.723777 | 2.855755 | 0.013131 | 0.127404 | -3.0129  |
| Cit       | 0.172204 | 3.942954 | 2.393784 | 0.031889 | 0.197011 | -3.83002 |
| Vmn2r51   | 0.17219  | 3.289464 | 2.186052 | 0.047045 | 0.23632  | -4.18062 |
| 5033403FO | 0.171892 | 3.378671 | 2.160487 | 0.049322 | 0.241398 | -4.22281 |
| Gm12657   | 0.17188  | 3.011233 | 2.670266 | 0.018803 | 0.152621 | -3.34589 |
| Zpbp      | 0.171451 | 3.640657 | 2.344954 | 0.034967 | 0.204726 | -3.91359 |
| Gm4461    | 0.171373 | 3.233961 | 2.651548 | 0.019493 | 0.155006 | -3.37917 |
| Olf1684   | 0.17121  | 3.295729 | 2.218622 | 0.044288 | 0.229126 | -4.12654 |
| Mup3      | 0.171143 | 3.24703  | 2.185186 | 0.047121 | 0.236365 | -4.18205 |
| Shoc2     | 0.171    | 8.256724 | 2.42256  | 0.030199 | 0.192505 | -3.78047 |
| Ang6      | 0.170895 | 3.334064 | 2.159684 | 0.049395 | 0.241628 | -4.22413 |
| Capn13    | 0.17081  | 3.547482 | 3.046912 | 0.009049 | 0.107222 | -2.66506 |
| 1600002HC | 0.170715 | 5.037832 | 2.541694 | 0.024069 | 0.17209  | -3.57314 |
| Tdpoz1    | 0.170525 | 3.286435 | 2.213229 | 0.044734 | 0.229968 | -4.13552 |
| Olf11009  | 0.170447 | 3.491474 | 2.746537 | 0.016228 | 0.141663 | -3.20962 |
| Gm6116    | 0.170437 | 3.378676 | 2.165737 | 0.048846 | 0.240237 | -4.21416 |
| Dld       | 0.170383 | 11.00316 | 2.181797 | 0.047417 | 0.237134 | -4.18766 |
| D330045A  | 0.170358 | 3.146214 | 2.517972 | 0.025185 | 0.175556 | -3.61469 |
| Fbrs      | 0.169874 | 7.209774 | 2.187283 | 0.046938 | 0.235973 | -4.17858 |
| Map4k4    | 0.169413 | 8.361725 | 2.339384 | 0.035335 | 0.205554 | -3.92308 |
| Kif4      | 0.169352 | 3.296672 | 2.19955  | 0.045884 | 0.233215 | -4.15825 |
| Olf1202   | 0.169325 | 3.064317 | 2.330638 | 0.035921 | 0.206968 | -3.93797 |
| Defb42    | 0.169284 | 3.30502  | 2.343359 | 0.035072 | 0.205001 | -3.91631 |
| C730002LC | 0.16925  | 3.249095 | 2.365032 | 0.033669 | 0.201461 | -3.87931 |
| LOC10263  | 0.16924  | 3.203273 | 2.183689 | 0.047252 | 0.236782 | -4.18453 |
| Rsph6a    | 0.169189 | 3.962524 | 2.309165 | 0.037399 | 0.211235 | -3.97441 |
| Rgs18     | 0.168989 | 3.34483  | 2.766173 | 0.015623 | 0.138772 | -3.17438 |
| Msh4      | 0.168952 | 3.581302 | 2.850389 | 0.013268 | 0.128197 | -3.0226  |
| Grin2b    | 0.168935 | 3.788406 | 2.286936 | 0.03899  | 0.215208 | -4.012   |
| Nynrin    | 0.168918 | 4.614244 | 2.192691 | 0.046471 | 0.234761 | -4.16962 |
| Oat       | 0.168742 | 9.532613 | 2.364152 | 0.033725 | 0.201586 | -3.88082 |
| Gm13388   | 0.168474 | 3.741382 | 2.340642 | 0.035252 | 0.205381 | -3.92094 |
| 1700109K2 | 0.168416 | 3.546773 | 2.260313 | 0.04098  | 0.221035 | -4.05681 |
| Mtbp      | 0.167575 | 4.049852 | 2.370576 | 0.033318 | 0.200415 | -3.86982 |

|            |          |          |          |          |          |          |
|------------|----------|----------|----------|----------|----------|----------|
| Fam222b    | 0.167284 | 6.313948 | 2.159341 | 0.049426 | 0.241686 | -4.2247  |
| Dlat       | 0.166843 | 10.24618 | 2.455671 | 0.028359 | 0.186758 | -3.72319 |
| Actl10     | 0.166653 | 3.674717 | 2.332478 | 0.035797 | 0.20667  | -3.93484 |
| Pmfbbp1    | 0.166641 | 3.412504 | 2.438121 | 0.02932  | 0.189868 | -3.75359 |
| Gm833      | 0.166555 | 3.606959 | 2.425909 | 0.030008 | 0.192176 | -3.77469 |
| Car6       | 0.166497 | 3.792965 | 2.502614 | 0.025934 | 0.178004 | -3.64152 |
| Emc3       | 0.166361 | 8.246104 | 2.196901 | 0.046109 | 0.233935 | -4.16264 |
| Parpbbp    | 0.166172 | 3.625892 | 2.225111 | 0.043757 | 0.228098 | -4.11573 |
| Lkaaear1   | 0.166151 | 3.461005 | 2.753866 | 0.015999 | 0.140614 | -3.19647 |
| Sbspon     | 0.165856 | 3.888592 | 2.215402 | 0.044554 | 0.229533 | -4.1319  |
| Igfn1      | 0.165748 | 3.883981 | 2.699695 | 0.017765 | 0.147997 | -3.29343 |
| Tiam1      | 0.165144 | 4.111381 | 2.240238 | 0.042542 | 0.22555  | -4.09046 |
| Fut8       | 0.1651   | 7.47936  | 2.267501 | 0.040433 | 0.219295 | -4.04474 |
| Tnfsf11    | 0.164975 | 3.5785   | 2.495421 | 0.026293 | 0.179203 | -3.65407 |
| Purb       | 0.164808 | 7.870816 | 2.324279 | 0.036353 | 0.208317 | -3.94877 |
| Ighv9-3    | 0.16478  | 3.114128 | 2.330979 | 0.035898 | 0.206965 | -3.93739 |
| Krtap14    | 0.164629 | 3.300657 | 2.500722 | 0.026028 | 0.178499 | -3.64483 |
| 5330417C2  | 0.164395 | 3.667158 | 2.172234 | 0.048263 | 0.239104 | -4.20345 |
| Vmn1r179   | 0.164144 | 3.284546 | 2.592557 | 0.021834 | 0.163665 | -3.48364 |
| Cd36       | 0.164063 | 12.43229 | 2.701833 | 0.017692 | 0.147742 | -3.28961 |
| Gm5544     | 0.163915 | 3.313891 | 2.233272 | 0.043098 | 0.226909 | -4.1021  |
| LOC102640  | 0.163842 | 3.869844 | 2.642532 | 0.019835 | 0.156366 | -3.39518 |
| Smim9      | 0.163298 | 3.191268 | 2.604084 | 0.021356 | 0.16212  | -3.46328 |
| Serpini2   | 0.163227 | 3.189523 | 2.219851 | 0.044187 | 0.229025 | -4.12449 |
| Gmnc       | 0.163177 | 3.606735 | 2.716574 | 0.017196 | 0.145849 | -3.26327 |
| 4933406M1  | 0.163069 | 3.45507  | 2.62278  | 0.020603 | 0.159312 | -3.4302  |
| Topaz1     | 0.16295  | 3.324151 | 2.811601 | 0.014306 | 0.133251 | -3.09263 |
| Ifna13     | 0.162743 | 3.120516 | 2.385525 | 0.032391 | 0.197862 | -3.8442  |
| Grsf1      | 0.162693 | 9.405891 | 2.332889 | 0.03577  | 0.206622 | -3.93414 |
| Cxcr6      | 0.162231 | 3.612773 | 2.318102 | 0.036777 | 0.209507 | -3.95926 |
| 1700010114 | 0.162123 | 3.638353 | 2.382321 | 0.032588 | 0.198515 | -3.8497  |
| Gm26787    | 0.162113 | 3.241701 | 2.180455 | 0.047535 | 0.237359 | -4.18987 |
| Fnta       | 0.161919 | 7.655341 | 2.160531 | 0.049318 | 0.241398 | -4.22274 |
| 1810024BC  | 0.161631 | 3.271164 | 2.173683 | 0.048134 | 0.238886 | -4.20106 |
| Trmt61b    | 0.161435 | 3.676746 | 2.486552 | 0.026741 | 0.180842 | -3.66953 |
| Esp16      | 0.16127  | 3.015938 | 2.395377 | 0.031794 | 0.196662 | -3.82729 |
| Arhgap9    | 0.161258 | 3.954897 | 2.329404 | 0.036005 | 0.207194 | -3.94006 |
| Gm13715    | 0.161235 | 3.682668 | 2.492766 | 0.026426 | 0.179495 | -3.6587  |
| Gm13982    | 0.160931 | 3.254945 | 2.339729 | 0.035312 | 0.205541 | -3.92249 |
| Defb37     | 0.16087  | 3.081574 | 2.306753 | 0.037569 | 0.211784 | -3.9785  |
| ldh3a      | 0.160807 | 11.09538 | 2.975449 | 0.010402 | 0.114104 | -2.79554 |
| Dkk4       | 0.16076  | 3.814185 | 2.312714 | 0.037151 | 0.21051  | -3.9684  |
| Pygm       | 0.159763 | 11.80254 | 2.277231 | 0.039705 | 0.21727  | -4.02836 |
| Ccdc126    | 0.159356 | 4.535244 | 2.408969 | 0.030986 | 0.194869 | -3.8039  |
| Helt       | 0.159115 | 3.533822 | 2.185285 | 0.047112 | 0.236365 | -4.18189 |
| Ift172     | 0.158956 | 5.741587 | 2.21803  | 0.044337 | 0.229137 | -4.12753 |
| Adam24     | 0.158781 | 3.454472 | 2.658057 | 0.019251 | 0.154199 | -3.3676  |
| LOC102635  | 0.158719 | 3.078139 | 2.537518 | 0.024262 | 0.17274  | -3.58046 |

|           |          |          |          |          |          |          |
|-----------|----------|----------|----------|----------|----------|----------|
| Ttc30a1   | 0.158502 | 3.565742 | 2.552042 | 0.023597 | 0.170472 | -3.55498 |
| 1700102PC | 0.158301 | 3.558562 | 2.303462 | 0.037802 | 0.212306 | -3.98407 |
| Tnfrsf17  | 0.158291 | 3.556115 | 2.535485 | 0.024357 | 0.17274  | -3.58403 |
| Tbc1d9    | 0.158274 | 4.227737 | 2.673508 | 0.018686 | 0.152222 | -3.34011 |
| Cpne4     | 0.158193 | 3.528315 | 2.422757 | 0.030187 | 0.192505 | -3.78013 |
| Gm26579   | 0.157772 | 3.120309 | 2.653026 | 0.019438 | 0.154832 | -3.37655 |
| Slc26a7   | 0.157711 | 3.548582 | 2.249601 | 0.041807 | 0.22298  | -4.07478 |
| Khdc1a    | 0.157593 | 3.354513 | 2.18543  | 0.0471   | 0.236365 | -4.18165 |
| Adam21    | 0.157003 | 3.569305 | 2.910953 | 0.011794 | 0.120438 | -2.91287 |
| Olf784    | 0.156798 | 3.069528 | 2.22573  | 0.043707 | 0.228027 | -4.11469 |
| LOC102634 | 0.156413 | 3.40682  | 2.421103 | 0.030282 | 0.192825 | -3.78299 |
| Slx4ip    | 0.155918 | 3.98901  | 2.215684 | 0.04453  | 0.229533 | -4.13143 |
| Prl8a2    | 0.155506 | 3.064244 | 2.210795 | 0.044936 | 0.23057  | -4.13957 |
| Dapl1     | 0.155402 | 3.405012 | 2.181001 | 0.047487 | 0.237359 | -4.18897 |
| LOC102636 | 0.155355 | 3.907186 | 2.546044 | 0.02387  | 0.171255 | -3.56551 |
| Gm805     | 0.155236 | 3.455548 | 2.335861 | 0.03557  | 0.206223 | -3.92908 |
| Ifne      | 0.155212 | 3.597137 | 2.605037 | 0.021317 | 0.16206  | -3.46159 |
| Slc18a3   | 0.155178 | 3.52811  | 2.322035 | 0.036507 | 0.208682 | -3.95258 |
| Cldn10    | 0.155175 | 3.424267 | 2.516137 | 0.025274 | 0.175749 | -3.6179  |
| Gm19325   | 0.154795 | 3.676844 | 2.290627 | 0.038722 | 0.214536 | -4.00577 |
| R3hdm1    | 0.154717 | 9.167528 | 2.223875 | 0.043858 | 0.228383 | -4.11779 |
| Gm7134    | 0.154344 | 3.665307 | 2.193762 | 0.046378 | 0.234491 | -4.16785 |
| 4930558GC | 0.1542   | 3.26517  | 2.284848 | 0.039143 | 0.215753 | -4.01552 |
| Exosc9    | 0.153727 | 6.62911  | 2.726286 | 0.016876 | 0.144492 | -3.24589 |
| Bre       | 0.153463 | 8.716054 | 2.210308 | 0.044977 | 0.23059  | -4.14038 |
| Snx9      | 0.15252  | 7.22779  | 2.364368 | 0.033711 | 0.201552 | -3.88045 |
| Zwilch    | 0.1519   | 3.464703 | 2.577637 | 0.022468 | 0.165987 | -3.50995 |
| Lyzl1     | 0.151798 | 3.290987 | 2.199313 | 0.045904 | 0.233215 | -4.15864 |
| Gm5416    | 0.151774 | 3.102091 | 2.454701 | 0.028412 | 0.186773 | -3.72488 |
| Tubb2a-ps | 0.15173  | 3.033385 | 2.626624 | 0.020451 | 0.158815 | -3.42339 |
| Stox1     | 0.151666 | 3.85692  | 2.344836 | 0.034975 | 0.204726 | -3.91379 |
| Kynu      | 0.151598 | 3.367384 | 2.535142 | 0.024372 | 0.17274  | -3.58463 |
| Gm5428    | 0.151476 | 8.770725 | 2.200427 | 0.045809 | 0.233077 | -4.1568  |
| Gm12506   | 0.151418 | 3.107936 | 2.301908 | 0.037912 | 0.212389 | -3.9867  |
| Gm16758   | 0.15136  | 3.651852 | 2.369174 | 0.033407 | 0.200602 | -3.87222 |
| Tdpoz3    | 0.151181 | 3.101551 | 2.569182 | 0.022835 | 0.167271 | -3.52484 |
| Tstd1     | 0.150879 | 3.644694 | 2.302966 | 0.037837 | 0.212307 | -3.98491 |
| Ms4a2     | 0.150613 | 3.224314 | 2.46449  | 0.027888 | 0.184778 | -3.70789 |
| 1700011H1 | 0.150438 | 3.357201 | 2.231271 | 0.043259 | 0.227315 | -4.10545 |
| Haus7     | 0.150353 | 3.821433 | 2.269992 | 0.040245 | 0.219147 | -4.04055 |
| Dcaf12l2  | 0.150326 | 3.589405 | 2.480481 | 0.027052 | 0.182026 | -3.6801  |
| LOC102634 | 0.150241 | 3.453539 | 2.543561 | 0.023983 | 0.171813 | -3.56986 |
| Mms22l    | 0.150191 | 3.581768 | 2.164293 | 0.048976 | 0.240575 | -4.21654 |
| 4933407G1 | 0.150024 | 3.321269 | 2.165145 | 0.048899 | 0.240387 | -4.21514 |
| Amy2b     | 0.149555 | 3.060454 | 2.512532 | 0.025448 | 0.176353 | -3.6242  |
| Ncam2     | 0.148899 | 3.307685 | 2.20677  | 0.045273 | 0.231348 | -4.14626 |
| 6330420HC | 0.148671 | 3.297806 | 2.316193 | 0.036909 | 0.209874 | -3.9625  |
| Myo3a     | 0.148461 | 3.32301  | 2.188571 | 0.046827 | 0.23567  | -4.17645 |

|           |          |          |          |          |          |          |
|-----------|----------|----------|----------|----------|----------|----------|
| Bpifa3    | 0.148248 | 3.475491 | 2.189712 | 0.046728 | 0.235597 | -4.17456 |
| Ddx4      | 0.14808  | 3.343327 | 2.40023  | 0.031503 | 0.196381 | -3.81894 |
| Ambp      | 0.14781  | 3.455741 | 2.383369 | 0.032523 | 0.198411 | -3.8479  |
| Gm11563   | 0.147785 | 3.285481 | 2.213363 | 0.044723 | 0.229968 | -4.1353  |
| Fanci     | 0.147776 | 3.55102  | 2.578617 | 0.022426 | 0.165799 | -3.50822 |
| 1700112J0 | 0.147057 | 3.54944  | 2.391872 | 0.032005 | 0.197039 | -3.83331 |
| Olf183    | 0.145901 | 3.152296 | 2.47813  | 0.027173 | 0.182265 | -3.68419 |
| Ccdc160   | 0.145067 | 3.711124 | 2.275563 | 0.039829 | 0.217708 | -4.03117 |
| Mael      | 0.144948 | 3.422002 | 2.259769 | 0.041021 | 0.221115 | -4.05773 |
| Olf1213   | 0.144669 | 3.143949 | 2.245937 | 0.042093 | 0.224028 | -4.08092 |
| Vmn2r11   | 0.143802 | 3.065309 | 2.179139 | 0.047651 | 0.237443 | -4.19205 |
| Olf1426   | 0.142988 | 3.261029 | 2.722003 | 0.017016 | 0.145017 | -3.25356 |
| Hk1os     | 0.142632 | 3.91881  | 2.363101 | 0.033792 | 0.201694 | -3.88261 |
| Bsph2     | 0.142507 | 3.190964 | 2.154941 | 0.049829 | 0.243034 | -4.23193 |
| 4933433F1 | 0.142192 | 3.550913 | 2.411156 | 0.030858 | 0.194747 | -3.80014 |
| Gm6994    | 0.142107 | 3.334563 | 2.352193 | 0.034493 | 0.203345 | -3.90124 |
| Atp5a1    | 0.141344 | 12.97725 | 2.397203 | 0.031684 | 0.196427 | -3.82415 |
| Vamp3     | 0.141161 | 6.613875 | 2.196404 | 0.046152 | 0.234095 | -4.16347 |
| 4930525G2 | 0.140554 | 3.137497 | 2.203621 | 0.045539 | 0.232153 | -4.15149 |
| Fer1l6    | 0.14014  | 3.726646 | 2.216054 | 0.0445   | 0.229533 | -4.13082 |
| Rgs13     | 0.139777 | 3.312646 | 2.394784 | 0.031829 | 0.196785 | -3.82831 |
| Sit1      | 0.139543 | 3.448108 | 2.45027  | 0.028652 | 0.187443 | -3.73256 |
| Obp1a     | 0.139199 | 3.080993 | 2.478538 | 0.027152 | 0.182235 | -3.68348 |
| Olf1748   | 0.138896 | 3.340688 | 2.462823 | 0.027976 | 0.185039 | -3.71079 |
| Calb2     | 0.13877  | 3.263477 | 2.223416 | 0.043895 | 0.228426 | -4.11855 |
| Vdac1     | 0.138767 | 11.60259 | 2.188472 | 0.046835 | 0.23567  | -4.17661 |
| Gm5615    | 0.138565 | 3.135689 | 2.208791 | 0.045104 | 0.230906 | -4.1429  |
| Ighv1-49  | 0.138494 | 3.014315 | 2.281961 | 0.039355 | 0.216376 | -4.02039 |
| Trav5-1   | 0.137848 | 3.073563 | 2.213117 | 0.044743 | 0.229968 | -4.13571 |
| Rnase10   | 0.136651 | 3.321499 | 2.378223 | 0.032841 | 0.198988 | -3.85673 |
| Gm10824   | 0.135997 | 3.515996 | 2.178621 | 0.047697 | 0.237623 | -4.1929  |
| Gm26597   | 0.134722 | 3.456928 | 2.257841 | 0.041169 | 0.221398 | -4.06096 |
| Ccne2     | 0.134403 | 3.753318 | 2.168806 | 0.04857  | 0.239939 | -4.20911 |
| Eprs      | 0.133925 | 8.784736 | 2.2139   | 0.044678 | 0.229815 | -4.1344  |
| Pole      | 0.133853 | 4.094352 | 2.212809 | 0.044769 | 0.229968 | -4.13622 |
| Ccdc173   | 0.13247  | 3.344067 | 2.20684  | 0.045267 | 0.231348 | -4.14614 |
| Sytl5     | 0.132443 | 3.464578 | 2.168044 | 0.048638 | 0.239939 | -4.21036 |
| Tdrp      | 0.131019 | 3.781655 | 2.160413 | 0.049328 | 0.241398 | -4.22293 |
| Olf1105   | 0.130825 | 3.229312 | 2.170533 | 0.048415 | 0.23957  | -4.20626 |
| Mir882    | 0.130646 | 3.034561 | 2.254887 | 0.041396 | 0.221728 | -4.06592 |
| Gm12320   | 0.129462 | 3.729933 | 2.312711 | 0.037151 | 0.21051  | -3.9684  |
| 4930515G1 | 0.129047 | 3.162994 | 2.188726 | 0.046813 | 0.23567  | -4.17619 |
| Chmp1b    | 0.127808 | 6.40863  | 2.250777 | 0.041715 | 0.222696 | -4.07281 |
| 4933436I0 | 0.127199 | 3.103639 | 2.263691 | 0.040722 | 0.220219 | -4.05114 |
| Olf169    | 0.126897 | 3.208549 | 2.221601 | 0.044043 | 0.228776 | -4.12158 |
| Mir3967   | 0.126141 | 3.204021 | 2.332905 | 0.035769 | 0.206622 | -3.93411 |
| Cib3      | 0.124986 | 3.731276 | 2.167351 | 0.048701 | 0.239979 | -4.2115  |
| Gabra6    | 0.124054 | 3.220718 | 2.228639 | 0.043471 | 0.227717 | -4.10984 |



|           |          |          |          |          |          |          |
|-----------|----------|----------|----------|----------|----------|----------|
| Ighv1-30  | 0.123208 | 2.937987 | 2.344837 | 0.034975 | 0.204726 | -3.91379 |
| Gm26705   | 0.121867 | 3.520487 | 2.154748 | 0.049846 | 0.243069 | -4.23225 |
| Gpr82     | 0.121134 | 3.144226 | 2.312114 | 0.037193 | 0.21051  | -3.96942 |
| Olfr301   | -0.12181 | 3.070606 | -2.31295 | 0.037135 | 0.21051  | -3.968   |
| Ak7       | -0.122   | 3.577103 | -2.20956 | 0.04504  | 0.230768 | -4.14163 |
| Myo7b     | -0.12348 | 3.84215  | -2.34836 | 0.034744 | 0.204142 | -3.90779 |
| Guca1a    | -0.12496 | 3.535504 | -2.26553 | 0.040582 | 0.219749 | -4.04804 |
| Dnajb3    | -0.13068 | 3.282155 | -2.2933  | 0.038529 | 0.213895 | -4.00126 |
| Hoxa3     | -0.13194 | 3.678903 | -2.2344  | 0.043007 | 0.226835 | -4.10021 |
| A4gnt     | -0.1346  | 3.341228 | -2.44001 | 0.029215 | 0.189508 | -3.75032 |
| Olfr770   | -0.13588 | 3.215749 | -2.40127 | 0.031441 | 0.196141 | -3.81715 |
| Wnt3a     | -0.13687 | 3.913822 | -2.32389 | 0.03638  | 0.208341 | -3.94944 |
| Cyp2c53-p | -0.13811 | 3.029333 | -2.51961 | 0.025107 | 0.175323 | -3.61183 |
| Oosp2     | -0.13981 | 3.456623 | -2.33582 | 0.035573 | 0.206223 | -3.92915 |
| F5        | -0.14124 | 3.555518 | -2.38627 | 0.032346 | 0.197804 | -3.84293 |
| Gm14025   | -0.14153 | 3.555617 | -2.67881 | 0.018496 | 0.151298 | -3.33067 |
| Th        | -0.14175 | 3.701586 | -2.36618 | 0.033596 | 0.201251 | -3.87734 |
| Abca14    | -0.14259 | 3.502272 | -2.37126 | 0.033275 | 0.200371 | -3.86865 |
| Olfr850   | -0.14405 | 3.340655 | -2.184   | 0.047225 | 0.236695 | -4.18402 |
| Orc1      | -0.1446  | 3.489387 | -2.38895 | 0.032182 | 0.197395 | -3.83832 |
| R3hdml    | -0.14561 | 3.899117 | -2.48721 | 0.026707 | 0.180714 | -3.66838 |
| Vmn2r16   | -0.14569 | 3.299875 | -2.56947 | 0.022823 | 0.167271 | -3.52434 |
| Tshb      | -0.14586 | 3.466704 | -2.36619 | 0.033596 | 0.201251 | -3.87734 |
| Gm8212    | -0.14589 | 3.225719 | -2.2671  | 0.040464 | 0.219347 | -4.04541 |
| Faim2     | -0.14609 | 3.934035 | -2.16796 | 0.048646 | 0.239939 | -4.2105  |
| Rbm27     | -0.14623 | 7.769823 | -2.61502 | 0.020912 | 0.160601 | -3.44393 |
| 270008912 | -0.1473  | 3.35392  | -2.31303 | 0.037129 | 0.21051  | -3.96786 |
| 4930470H1 | -0.14778 | 3.375412 | -2.19114 | 0.046604 | 0.235195 | -4.17219 |
| Lipc      | -0.14822 | 3.525581 | -2.48937 | 0.026598 | 0.18032  | -3.66462 |
| Hcar2     | -0.14826 | 3.633306 | -2.67307 | 0.018702 | 0.152222 | -3.3409  |
| 1700024F1 | -0.14832 | 3.22646  | -2.1677  | 0.048669 | 0.239939 | -4.21093 |
| 6330409D2 | -0.1488  | 3.663311 | -2.36085 | 0.033935 | 0.202007 | -3.88645 |
| Olfr944   | -0.14884 | 3.230757 | -2.55114 | 0.023638 | 0.170528 | -3.55656 |
| Gabrd     | -0.14905 | 4.154806 | -2.38701 | 0.0323   | 0.197762 | -3.84165 |
| Rhox4f    | -0.14914 | 3.333064 | -2.16788 | 0.048653 | 0.239939 | -4.21063 |
| Vmn1r194  | -0.14927 | 3.184071 | -2.22657 | 0.043638 | 0.227956 | -4.11328 |
| Tmprss7   | -0.14984 | 3.469269 | -2.45776 | 0.028247 | 0.186313 | -3.71957 |
| Cldn34b3  | -0.14995 | 3.021706 | -2.6921  | 0.018028 | 0.149042 | -3.30698 |
| Mir451a   | -0.15023 | 3.465574 | -2.21897 | 0.044259 | 0.229126 | -4.12596 |
| Nxph1     | -0.15025 | 3.46247  | -2.2104  | 0.044969 | 0.23059  | -4.14022 |
| BE692007  | -0.15036 | 3.257259 | -2.65049 | 0.019533 | 0.155006 | -3.38106 |
| Vstm5     | -0.15046 | 3.698046 | -2.27122 | 0.040153 | 0.218858 | -4.03848 |
| Gm13985   | -0.15111 | 3.406459 | -2.42718 | 0.029936 | 0.191974 | -3.77251 |
| Vapb      | -0.15118 | 7.771901 | -2.35603 | 0.034245 | 0.20265  | -3.8947  |
| Lrrc19    | -0.15136 | 3.400962 | -2.82459 | 0.01395  | 0.131762 | -3.06921 |
| Reg4      | -0.15172 | 3.540593 | -2.30126 | 0.037958 | 0.212405 | -3.98779 |
| Ccdc155   | -0.15203 | 3.712887 | -2.53602 | 0.024332 | 0.17274  | -3.5831  |
| Prss51    | -0.15212 | 3.823191 | -2.2681  | 0.040388 | 0.219225 | -4.04374 |

|             |          |          |          |          |          |          |
|-------------|----------|----------|----------|----------|----------|----------|
| Zmat4       | -0.15238 | 3.471171 | -2.31626 | 0.036905 | 0.209874 | -3.96238 |
| D7Erttd143c | -0.15302 | 3.690253 | -2.48105 | 0.027023 | 0.182017 | -3.67911 |
| Hils1       | -0.15388 | 3.927294 | -2.25555 | 0.041345 | 0.221709 | -4.0648  |
| 1700064M    | -0.15398 | 3.374345 | -2.3577  | 0.034137 | 0.202446 | -3.89184 |
| 1700029N1   | -0.15416 | 3.437161 | -2.73381 | 0.016632 | 0.143369 | -3.23242 |
| Rep15       | -0.15434 | 3.519592 | -2.19303 | 0.046441 | 0.234709 | -4.16906 |
| Gm26664     | -0.15448 | 3.409497 | -2.26868 | 0.040344 | 0.219225 | -4.04275 |
| Ckap2       | -0.1545  | 3.38377  | -2.54787 | 0.023787 | 0.170986 | -3.56231 |
| C86695      | -0.15498 | 3.698554 | -2.52297 | 0.024946 | 0.174974 | -3.60594 |
| Chrne       | -0.15501 | 3.747448 | -2.7944  | 0.014791 | 0.135469 | -3.12362 |
| Psg21       | -0.15502 | 3.155075 | -2.59846 | 0.021588 | 0.162878 | -3.47321 |
| Krtap16-1   | -0.15545 | 3.737462 | -2.39794 | 0.03164  | 0.196427 | -3.82289 |
| Prps1l1     | -0.15621 | 3.447935 | -2.30344 | 0.037803 | 0.212306 | -3.98411 |
| Ccdc170     | -0.15697 | 4.073046 | -2.44795 | 0.028779 | 0.188035 | -3.73658 |
| 9130230L2   | -0.15698 | 3.429893 | -2.18011 | 0.047565 | 0.237359 | -4.19044 |
| Rph3a       | -0.157   | 3.96618  | -2.16359 | 0.04904  | 0.240744 | -4.2177  |
| Pcdh10      | -0.15701 | 3.590113 | -2.20205 | 0.045671 | 0.232519 | -4.1541  |
| Rhox2d      | -0.15728 | 3.209527 | -2.35529 | 0.034293 | 0.202789 | -3.89597 |
| 1700006A1   | -0.1576  | 3.207251 | -2.51293 | 0.025429 | 0.176286 | -3.62351 |
| Cpa2        | -0.15764 | 3.244912 | -2.28968 | 0.03879  | 0.214718 | -4.00737 |
| Grik2       | -0.15813 | 3.72359  | -2.37029 | 0.033336 | 0.200449 | -3.87031 |
| Olf3        | -0.15861 | 3.660768 | -2.75405 | 0.015994 | 0.140614 | -3.19614 |
| Amigo3      | -0.15868 | 3.889574 | -2.37529 | 0.033024 | 0.199443 | -3.86176 |
| Olf38       | -0.15891 | 3.244197 | -2.92946 | 0.011377 | 0.118987 | -2.87924 |
| Fbxo41      | -0.15913 | 3.95795  | -2.26556 | 0.04058  | 0.219749 | -4.04799 |
| Cldn18      | -0.15975 | 3.523071 | -2.22041 | 0.044141 | 0.228949 | -4.12357 |
| Nptn        | -0.1601  | 8.469103 | -2.38795 | 0.032243 | 0.197623 | -3.84004 |
| Il13        | -0.16019 | 3.877343 | -2.4546  | 0.028417 | 0.186773 | -3.72505 |
| Tyr         | -0.16128 | 3.394947 | -2.85502 | 0.01315  | 0.127446 | -3.01424 |
| Msantd3     | -0.16161 | 4.860762 | -2.17678 | 0.047859 | 0.238146 | -4.19594 |
| Olf1195     | -0.16171 | 3.418981 | -2.43573 | 0.029454 | 0.190182 | -3.75772 |
| Hoxd4       | -0.16179 | 3.719235 | -2.38505 | 0.032421 | 0.197979 | -3.84503 |
| Nkain3      | -0.16204 | 4.060908 | -2.17831 | 0.047724 | 0.237671 | -4.19342 |
| Rgs16       | -0.1624  | 3.936786 | -2.58425 | 0.022185 | 0.164927 | -3.49829 |
| Mylk2       | -0.16285 | 3.868935 | -2.65389 | 0.019406 | 0.154807 | -3.37501 |
| LOC102636   | -0.16314 | 3.342745 | -2.16523 | 0.048892 | 0.240387 | -4.21501 |
| Rnase6      | -0.16315 | 3.710985 | -2.31216 | 0.03719  | 0.21051  | -3.96934 |
| Cyp1a2      | -0.16319 | 3.702586 | -2.249   | 0.041854 | 0.223135 | -4.07579 |
| Mrgprb4     | -0.16365 | 3.211065 | -2.40072 | 0.031474 | 0.196247 | -3.8181  |
| Gm16551     | -0.16369 | 3.487083 | -2.38324 | 0.032531 | 0.198411 | -3.84812 |
| Polk        | -0.1637  | 4.253272 | -2.42075 | 0.030303 | 0.192863 | -3.7836  |
| Vmn1r24     | -0.16475 | 3.173568 | -2.19847 | 0.045975 | 0.233398 | -4.16004 |
| Cbx5        | -0.16484 | 6.573507 | -2.40161 | 0.031421 | 0.196141 | -3.81657 |
| Astx2       | -0.16514 | 3.051954 | -2.98933 | 0.010124 | 0.112715 | -2.77024 |
| Grm2        | -0.16515 | 3.648463 | -2.65414 | 0.019396 | 0.154797 | -3.37456 |
| Ndn         | -0.16515 | 4.474389 | -2.18328 | 0.047287 | 0.236834 | -4.1852  |
| Serp1b6d    | -0.16579 | 3.320507 | -2.46674 | 0.027769 | 0.184384 | -3.70399 |
| BC051019    | -0.16584 | 3.598638 | -2.47603 | 0.027282 | 0.182517 | -3.68784 |

|           |          |          |          |          |          |          |
|-----------|----------|----------|----------|----------|----------|----------|
| Kcnh5     | -0.16596 | 3.612249 | -2.56858 | 0.022861 | 0.167354 | -3.52589 |
| Eddm3b    | -0.16625 | 3.554489 | -2.49546 | 0.02629  | 0.179203 | -3.654   |
| Kctd14    | -0.1664  | 3.489065 | -2.48087 | 0.027032 | 0.182017 | -3.67942 |
| Gkn2      | -0.16676 | 3.674922 | -3.05768 | 0.00886  | 0.106411 | -2.64536 |
| Gm2381    | -0.16678 | 3.159692 | -2.52615 | 0.024795 | 0.174472 | -3.60039 |
| Olf1350   | -0.16682 | 3.80347  | -2.2794  | 0.039544 | 0.216972 | -4.02471 |
| Myo16     | -0.16684 | 3.527581 | -2.31236 | 0.037176 | 0.21051  | -3.969   |
| Gm13247   | -0.16712 | 3.17279  | -2.40728 | 0.031085 | 0.195196 | -3.80681 |
| Oxgr1     | -0.16719 | 3.3701   | -2.90126 | 0.012019 | 0.121214 | -2.93046 |
| 2210416O  | -0.1674  | 3.703001 | -2.53465 | 0.024395 | 0.17274  | -3.58548 |
| Aqp9      | -0.16746 | 3.76246  | -2.17066 | 0.048403 | 0.23956  | -4.20604 |
| Cpz       | -0.16839 | 3.896761 | -2.29763 | 0.038217 | 0.21282  | -3.99394 |
| Prlh      | -0.16867 | 4.439428 | -2.18448 | 0.047183 | 0.23658  | -4.18323 |
| C130040N  | -0.16873 | 3.75019  | -2.37799 | 0.032855 | 0.198988 | -3.85712 |
| 8430423G  | -0.16887 | 4.100622 | -2.2781  | 0.03964  | 0.217156 | -4.0269  |
| Vmn1r202  | -0.16894 | 3.129477 | -2.74353 | 0.016322 | 0.142028 | -3.215   |
| Atp7b     | -0.16934 | 4.183724 | -2.3409  | 0.035235 | 0.20533  | -3.9205  |
| Gm17821   | -0.16964 | 3.560116 | -3.05806 | 0.008854 | 0.106411 | -2.64467 |
| Gspt2     | -0.16976 | 3.656659 | -2.87549 | 0.012637 | 0.124663 | -2.97718 |
| Gm13807   | -0.1699  | 3.612315 | -2.38132 | 0.03265  | 0.19855  | -3.85142 |
| Lypd8     | -0.16998 | 3.592746 | -2.2695  | 0.040283 | 0.219147 | -4.04137 |
| Lrch2     | -0.17022 | 3.986588 | -2.30014 | 0.038038 | 0.212595 | -3.98969 |
| Tsx       | -0.17022 | 4.119642 | -2.23967 | 0.042588 | 0.225646 | -4.09141 |
| Ddx55     | -0.17077 | 4.60065  | -2.21757 | 0.044374 | 0.229137 | -4.12829 |
| Eva1b     | -0.17087 | 4.018405 | -2.25141 | 0.041666 | 0.222516 | -4.07175 |
| Hvcn1     | -0.17123 | 3.846024 | -2.22069 | 0.044118 | 0.228938 | -4.12309 |
| Rassf10   | -0.17152 | 3.813085 | -2.30211 | 0.037898 | 0.212389 | -3.98636 |
| Ano2      | -0.17162 | 3.71896  | -2.45689 | 0.028294 | 0.186524 | -3.72109 |
| Gm15997   | -0.17166 | 3.90017  | -2.21273 | 0.044775 | 0.229968 | -4.13635 |
| St8sia3   | -0.17188 | 3.553953 | -2.73992 | 0.016437 | 0.142576 | -3.22148 |
| 1700016G1 | -0.17205 | 3.3907   | -2.91522 | 0.011697 | 0.120141 | -2.90512 |
| Chst5     | -0.17234 | 4.032155 | -2.1659  | 0.048831 | 0.240237 | -4.2139  |
| Rltpr     | -0.17236 | 4.025065 | -2.57678 | 0.022505 | 0.166115 | -3.51146 |
| Opr1      | -0.1726  | 3.749313 | -2.35245 | 0.034477 | 0.203345 | -3.90081 |
| Gm15471   | -0.1726  | 3.585251 | -2.55179 | 0.023608 | 0.170472 | -3.55541 |
| Enpp7     | -0.17288 | 3.710275 | -2.87513 | 0.012645 | 0.124685 | -2.97782 |
| Dnah1     | -0.17296 | 3.642115 | -2.75485 | 0.015969 | 0.140608 | -3.1947  |
| A730085K  | -0.17321 | 3.704737 | -2.39286 | 0.031945 | 0.197039 | -3.8316  |
| Gm16582   | -0.17341 | 3.426233 | -2.62507 | 0.020512 | 0.159007 | -3.42614 |
| Slc9a5    | -0.17364 | 4.066989 | -2.19457 | 0.046309 | 0.234421 | -4.16651 |
| Cyp4x1    | -0.17367 | 4.049398 | -2.21989 | 0.044184 | 0.229025 | -4.12443 |
| Cdc123    | -0.17368 | 9.133213 | -2.51513 | 0.025322 | 0.17589  | -3.61966 |
| Il12rb1   | -0.17372 | 3.883518 | -2.80696 | 0.014435 | 0.13377  | -3.101   |
| Gm5712    | -0.17399 | 3.536621 | -2.56975 | 0.02281  | 0.167271 | -3.52383 |
| Gm15523   | -0.17444 | 4.557314 | -2.50927 | 0.025607 | 0.176732 | -3.6299  |
| Gm16174   | -0.17512 | 4.18555  | -2.33102 | 0.035895 | 0.206965 | -3.93731 |
| D730048I0 | -0.17524 | 3.294458 | -2.76191 | 0.015752 | 0.139409 | -3.18204 |
| Olf447    | -0.17535 | 3.647675 | -2.28462 | 0.03916  | 0.215753 | -4.01591 |

|           |          |          |          |          |          |          |
|-----------|----------|----------|----------|----------|----------|----------|
| Dpys      | -0.17549 | 3.442529 | -2.42749 | 0.029918 | 0.191974 | -3.77196 |
| Tmem182   | -0.17609 | 11.67497 | -2.34353 | 0.035061 | 0.205001 | -3.91602 |
| 1700046CC | -0.17611 | 3.216065 | -2.86986 | 0.012776 | 0.125363 | -2.98738 |
| Sox5os3   | -0.17647 | 3.591451 | -2.16843 | 0.048604 | 0.239939 | -4.20973 |
| Usp7      | -0.1765  | 7.786424 | -2.92924 | 0.011382 | 0.118989 | -2.87965 |
| Clic3     | -0.17659 | 3.996016 | -2.45816 | 0.028225 | 0.186301 | -3.71888 |
| 943006010 | -0.17667 | 3.540003 | -2.1783  | 0.047725 | 0.237671 | -4.19344 |
| 2300005BC | -0.17681 | 3.760471 | -2.29455 | 0.038438 | 0.213583 | -3.99914 |
| Scpep1os  | -0.17696 | 3.770896 | -2.2174  | 0.044389 | 0.229137 | -4.12858 |
| Lrrc10b   | -0.17699 | 3.803026 | -2.29165 | 0.038648 | 0.214318 | -4.00405 |
| Hecw1     | -0.17714 | 3.629286 | -2.26746 | 0.040436 | 0.219295 | -4.04481 |
| Slc2a2    | -0.17724 | 3.84815  | -2.21099 | 0.04492  | 0.230537 | -4.13925 |
| Rab44     | -0.17726 | 4.321528 | -2.47239 | 0.027472 | 0.183341 | -3.69417 |
| Gm11494   | -0.17768 | 3.500354 | -2.26074 | 0.040947 | 0.220997 | -4.05609 |
| Cnot10    | -0.17787 | 5.682061 | -2.28241 | 0.039322 | 0.216368 | -4.01963 |
| Wfdc5     | -0.17818 | 3.556827 | -2.42223 | 0.030218 | 0.192568 | -3.78104 |
| Fam69c    | -0.17828 | 3.81711  | -2.87721 | 0.012594 | 0.124572 | -2.97406 |
| 1700019M  | -0.17855 | 3.117594 | -2.84394 | 0.013436 | 0.12907  | -3.03426 |
| Htr1a     | -0.17859 | 3.593892 | -2.46263 | 0.027987 | 0.185039 | -3.71112 |
| Gpr142    | -0.17885 | 4.037204 | -2.22126 | 0.044072 | 0.228826 | -4.12215 |
| Cnpy1     | -0.17891 | 3.527734 | -2.23864 | 0.042669 | 0.225934 | -4.09313 |
| Lamb2     | -0.17905 | 9.339837 | -2.1628  | 0.049112 | 0.241001 | -4.219   |
| Nudt5     | -0.17906 | 4.995592 | -2.23488 | 0.042969 | 0.22678  | -4.09941 |
| 4921517D  | -0.17911 | 3.626265 | -2.76613 | 0.015624 | 0.138772 | -3.17445 |
| Gm16142   | -0.17991 | 3.871062 | -2.29299 | 0.038551 | 0.213922 | -4.00177 |
| Cacna1b   | -0.17992 | 3.815474 | -2.49477 | 0.026325 | 0.179203 | -3.65521 |
| Defb28    | -0.17998 | 3.50205  | -2.25314 | 0.041531 | 0.22218  | -4.06885 |
| Gm17783   | -0.18002 | 3.531408 | -2.36645 | 0.033579 | 0.201245 | -3.87688 |
| 10C0044D1 | -0.18004 | 3.571518 | -2.93238 | 0.011313 | 0.118764 | -2.87395 |
| Ctrb1     | -0.18007 | 3.959525 | -2.82155 | 0.014033 | 0.13214  | -3.0747  |
| Dsp       | -0.18031 | 11.65887 | -2.49577 | 0.026275 | 0.179203 | -3.65347 |
| Olf1337   | -0.18034 | 4.035968 | -2.53481 | 0.024388 | 0.17274  | -3.58521 |
| Lmtk3     | -0.18035 | 4.021966 | -2.58647 | 0.022091 | 0.164597 | -3.49438 |
| Tbr1      | -0.18043 | 3.343869 | -2.82707 | 0.013883 | 0.131622 | -3.06473 |
| Fezf1     | -0.18062 | 3.698022 | -2.33573 | 0.035579 | 0.206223 | -3.9293  |
| LOC10263  | -0.18078 | 4.51752  | -2.38994 | 0.032122 | 0.197284 | -3.83663 |
| Khdrbs2   | -0.18088 | 3.665582 | -2.58184 | 0.022288 | 0.165397 | -3.50255 |
| Des       | -0.18103 | 12.02407 | -2.51446 | 0.025355 | 0.176026 | -3.62083 |
| Pigf      | -0.18129 | 4.13022  | -2.26818 | 0.040382 | 0.219225 | -4.04359 |
| Galnt9    | -0.18143 | 3.931747 | -2.6244  | 0.020539 | 0.159113 | -3.42733 |
| Cdc7      | -0.18186 | 3.723521 | -2.61959 | 0.02073  | 0.159856 | -3.43585 |
| 1700116BC | -0.18244 | 3.763026 | -2.39549 | 0.031787 | 0.196662 | -3.8271  |
| Fam193b   | -0.18245 | 5.358483 | -2.55771 | 0.023343 | 0.169579 | -3.54502 |
| Gpr173    | -0.18251 | 3.641169 | -2.62564 | 0.02049  | 0.158912 | -3.42513 |
| 1700023C2 | -0.18251 | 3.51226  | -2.63949 | 0.019951 | 0.156691 | -3.40058 |
| Firre     | -0.18252 | 6.006724 | -2.18019 | 0.047558 | 0.237359 | -4.19031 |
| Zfp428    | -0.18253 | 3.618617 | -2.96547 | 0.010606 | 0.11479  | -2.81372 |
| Pabpc1l   | -0.18256 | 3.651967 | -2.42984 | 0.029785 | 0.191527 | -3.7679  |

|           |          |          |          |          |          |          |
|-----------|----------|----------|----------|----------|----------|----------|
| 4930548K1 | -0.18265 | 3.449529 | -2.48952 | 0.02659  | 0.18032  | -3.66435 |
| Krt77     | -0.18271 | 3.889686 | -2.55548 | 0.023442 | 0.170065 | -3.54893 |
| Rhox5     | -0.18289 | 3.801376 | -2.29972 | 0.038067 | 0.212616 | -3.99039 |
| Gm16863   | -0.18313 | 4.300037 | -2.6526  | 0.019454 | 0.154861 | -3.37731 |
| Tuft1     | -0.18316 | 3.595105 | -2.30772 | 0.037501 | 0.211546 | -3.97687 |
| Gm5331    | -0.18324 | 3.620539 | -2.61955 | 0.020731 | 0.159856 | -3.43592 |
| Atp1b4    | -0.18331 | 3.59365  | -2.45444 | 0.028426 | 0.186773 | -3.72533 |
| Olfr371   | -0.18364 | 3.377176 | -3.39321 | 0.0046   | 0.077427 | -2.02824 |
| BC048679  | -0.18387 | 3.85582  | -2.35332 | 0.03442  | 0.203155 | -3.89932 |
| 9530003J2 | -0.18404 | 3.530865 | -2.64725 | 0.019656 | 0.155567 | -3.38681 |
| G630093K  | -0.18441 | 3.727456 | -2.34522 | 0.034949 | 0.204726 | -3.91314 |
| Gm2694    | -0.18515 | 3.662391 | -2.41153 | 0.030836 | 0.194714 | -3.79949 |
| H2-T10    | -0.18531 | 3.80196  | -2.64833 | 0.019615 | 0.155392 | -3.38489 |
| Ccl28     | -0.18541 | 3.943185 | -2.49773 | 0.026177 | 0.179011 | -3.65004 |
| Hoxc5     | -0.18559 | 3.287739 | -3.31751 | 0.005333 | 0.083228 | -2.16783 |
| Ccser1    | -0.18562 | 3.677697 | -2.28918 | 0.038827 | 0.21472  | -4.00821 |
| Optc      | -0.18566 | 3.897893 | -2.4795  | 0.027102 | 0.182091 | -3.68181 |
| Il22ra1   | -0.18567 | 3.827577 | -2.18031 | 0.047548 | 0.237359 | -4.19011 |
| Cul2      | -0.1858  | 7.097853 | -2.62573 | 0.020486 | 0.158912 | -3.42498 |
| Lrrc71    | -0.18588 | 4.040931 | -2.23149 | 0.043241 | 0.227315 | -4.10509 |
| Pantr1    | -0.18592 | 3.84747  | -2.18089 | 0.047497 | 0.237359 | -4.18915 |
| 2700049AC | -0.18635 | 5.087002 | -2.25523 | 0.04137  | 0.221728 | -4.06534 |
| A930001A2 | -0.18662 | 3.341015 | -2.87606 | 0.012623 | 0.124572 | -2.97614 |
| Lrrc26    | -0.18666 | 4.132746 | -2.23898 | 0.042642 | 0.225838 | -4.09256 |
| Ankle1    | -0.18682 | 4.415219 | -2.33422 | 0.035681 | 0.206402 | -3.93188 |
| Mkks      | -0.18703 | 5.273512 | -2.33443 | 0.035666 | 0.206402 | -3.93151 |
| Fam13c    | -0.18724 | 4.781219 | -2.25584 | 0.041323 | 0.221709 | -4.06431 |
| Dydc1     | -0.18732 | 3.443288 | -2.51181 | 0.025483 | 0.176497 | -3.62546 |
| Btn2a2    | -0.18733 | 3.3383   | -2.5951  | 0.021728 | 0.16334  | -3.47915 |
| A930018P2 | -0.18748 | 4.208667 | -2.43969 | 0.029233 | 0.18955  | -3.75087 |
| Vmn2r105  | -0.18763 | 3.201596 | -2.37022 | 0.033341 | 0.200449 | -3.87044 |
| Gm6568    | -0.18763 | 3.590836 | -2.23324 | 0.0431   | 0.226909 | -4.10215 |
| Fam178b   | -0.18768 | 3.734531 | -2.85539 | 0.01314  | 0.127404 | -3.01356 |
| Slc13a4   | -0.18809 | 4.040719 | -2.62762 | 0.020412 | 0.158724 | -3.42162 |
| Mad2l1bp  | -0.18817 | 4.623364 | -2.27938 | 0.039545 | 0.216972 | -4.02474 |
| Dytn      | -0.18822 | 3.764938 | -2.42187 | 0.030238 | 0.19265  | -3.78166 |
| Htr5a     | -0.18834 | 4.008369 | -2.41104 | 0.030865 | 0.194747 | -3.80034 |
| Gm7276    | -0.18837 | 4.338757 | -2.22597 | 0.043687 | 0.227973 | -4.11429 |
| Mroh6     | -0.18842 | 4.087596 | -2.32207 | 0.036504 | 0.208682 | -3.95252 |
| Jph3      | -0.18896 | 3.487959 | -2.35226 | 0.034489 | 0.203345 | -3.90114 |
| 1500015L2 | -0.18925 | 3.332377 | -2.60711 | 0.021233 | 0.161865 | -3.45792 |
| Gm960     | -0.18942 | 3.725847 | -2.45289 | 0.028509 | 0.186955 | -3.72802 |
| Olfr345   | -0.18984 | 3.350069 | -2.20604 | 0.045335 | 0.231516 | -4.14747 |
| 2210409DC | -0.19005 | 3.931422 | -2.24321 | 0.042307 | 0.224735 | -4.08548 |
| Ptprcap   | -0.19007 | 4.159359 | -2.391   | 0.032057 | 0.19719  | -3.8348  |
| Serpina11 | -0.19018 | 3.724165 | -2.47732 | 0.027215 | 0.182315 | -3.6856  |
| Fut1      | -0.19025 | 3.585702 | -2.83369 | 0.013706 | 0.130596 | -3.05278 |
| Slc14a2   | -0.19027 | 3.653809 | -2.41456 | 0.03066  | 0.194094 | -3.79427 |

|           |          |          |          |          |          |          |
|-----------|----------|----------|----------|----------|----------|----------|
| 4930481BC | -0.19041 | 3.868827 | -2.2645  | 0.04066  | 0.220085 | -4.04977 |
| Prkag1    | -0.1905  | 9.228644 | -2.33029 | 0.035945 | 0.206994 | -3.93856 |
| P3h3      | -0.19064 | 5.416236 | -2.22226 | 0.043989 | 0.228638 | -4.12048 |
| Cyp46a1   | -0.19065 | 4.032115 | -2.2356  | 0.042912 | 0.226685 | -4.09822 |
| Actl6b    | -0.191   | 3.50541  | -2.53943 | 0.024174 | 0.172575 | -3.57712 |
| Olf686    | -0.19159 | 3.595205 | -2.21449 | 0.044629 | 0.229611 | -4.13342 |
| Guca2a    | -0.19183 | 4.023061 | -2.72735 | 0.016841 | 0.14442  | -3.24399 |
| Mir551b   | -0.19186 | 3.665868 | -2.29303 | 0.038548 | 0.213922 | -4.00171 |
| Ptx4      | -0.19219 | 3.584812 | -2.59127 | 0.021888 | 0.163799 | -3.48591 |
| 4930568E1 | -0.19227 | 3.881648 | -2.18535 | 0.047107 | 0.236365 | -4.18178 |
| P2rx1     | -0.19236 | 3.800547 | -2.22699 | 0.043604 | 0.227942 | -4.11259 |
| Slc2a10   | -0.19257 | 4.391018 | -2.82234 | 0.014011 | 0.131987 | -3.07327 |
| Myh4      | -0.19264 | 3.353064 | -3.15465 | 0.007332 | 0.096642 | -2.46758 |
| A730090H  | -0.19277 | 3.401093 | -2.44036 | 0.029196 | 0.189459 | -3.74972 |
| Olf591    | -0.19282 | 3.289819 | -2.21739 | 0.04439  | 0.229137 | -4.1286  |
| Cdc20b    | -0.1929  | 4.011785 | -2.30846 | 0.037449 | 0.211396 | -3.97561 |
| Arhgap15c | -0.19324 | 3.339334 | -3.39535 | 0.004581 | 0.077427 | -2.02428 |
| Gm10847   | -0.19326 | 3.61447  | -2.34204 | 0.035159 | 0.20513  | -3.91856 |
| Cldn34b2  | -0.19378 | 3.451531 | -2.3163  | 0.036902 | 0.209874 | -3.96232 |
| Gm20750   | -0.19382 | 3.479589 | -2.61164 | 0.021049 | 0.161233 | -3.44992 |
| Nomo1     | -0.19383 | 7.920502 | -2.51667 | 0.025248 | 0.175619 | -3.61696 |
| Msl1      | -0.19392 | 3.798303 | -2.69148 | 0.018049 | 0.14917  | -3.30808 |
| Slc46a1   | -0.19405 | 4.793761 | -2.65596 | 0.019328 | 0.154459 | -3.37133 |
| Igfl3     | -0.19426 | 3.432168 | -3.07729 | 0.008528 | 0.104487 | -2.60946 |
| Grin2c    | -0.19436 | 3.855048 | -2.89213 | 0.012234 | 0.122094 | -2.94703 |
| Gm8587    | -0.19441 | 3.281782 | -2.65732 | 0.019278 | 0.154247 | -3.36891 |
| Foxo4     | -0.19445 | 5.330346 | -2.74242 | 0.016357 | 0.142234 | -3.21699 |
| 4930511E0 | -0.1947  | 3.515038 | -2.91595 | 0.01168  | 0.120141 | -2.9038  |
| 4930448F1 | -0.1948  | 3.302501 | -2.59655 | 0.021668 | 0.16313  | -3.47659 |
| Psmc3     | -0.19489 | 9.046434 | -2.23802 | 0.042719 | 0.226099 | -4.09417 |
| Otog      | -0.19499 | 3.872396 | -2.42663 | 0.029967 | 0.192053 | -3.77345 |
| Cyb5b     | -0.19511 | 7.817159 | -2.35011 | 0.034629 | 0.203657 | -3.90479 |
| Wnt7a     | -0.19511 | 4.024841 | -2.43431 | 0.029533 | 0.190502 | -3.76018 |
| 4930401C1 | -0.19518 | 3.795478 | -3.02902 | 0.00937  | 0.108875 | -2.69777 |
| Akap6     | -0.19533 | 9.253574 | -2.27353 | 0.03998  | 0.218332 | -4.03459 |
| Fbxo5     | -0.19536 | 3.869363 | -2.2551  | 0.04138  | 0.221728 | -4.06556 |
| Sdcbp2    | -0.19554 | 4.050181 | -2.19931 | 0.045904 | 0.233215 | -4.15865 |
| Ptchd2    | -0.19563 | 3.938482 | -3.10686 | 0.008049 | 0.101627 | -2.55528 |
| St8sia3os | -0.19574 | 3.618763 | -2.63239 | 0.020226 | 0.158017 | -3.41317 |
| Mast1     | -0.19581 | 3.669266 | -2.15638 | 0.049696 | 0.242627 | -4.22956 |
| Gm10857   | -0.19588 | 3.463993 | -2.8761  | 0.012622 | 0.124572 | -2.97607 |
| Gm17801   | -0.19594 | 3.427178 | -2.27816 | 0.039635 | 0.217156 | -4.02679 |
| Htr2c     | -0.19607 | 3.538686 | -2.53731 | 0.024272 | 0.17274  | -3.58084 |
| Akr1c12   | -0.19607 | 3.109565 | -2.3383  | 0.035408 | 0.205665 | -3.92493 |
| Gak       | -0.19612 | 6.652917 | -2.16617 | 0.048807 | 0.240219 | -4.21345 |
| Osr2      | -0.19612 | 3.749596 | -2.80297 | 0.014548 | 0.134134 | -3.10819 |
| Ppapdc1a  | -0.19623 | 4.076362 | -2.6104  | 0.021099 | 0.161342 | -3.45212 |
| Ssxb3     | -0.19625 | 3.38812  | -2.21868 | 0.044283 | 0.229126 | -4.12645 |

|           |          |          |          |          |          |          |
|-----------|----------|----------|----------|----------|----------|----------|
| 9830107B1 | -0.19631 | 3.671622 | -2.30345 | 0.037803 | 0.212306 | -3.9841  |
| Tcaf3     | -0.19647 | 3.625071 | -3.2508  | 0.006076 | 0.088227 | -2.29076 |
| Prr23a1   | -0.19652 | 3.676561 | -2.19697 | 0.046103 | 0.233935 | -4.16253 |
| Nkg7      | -0.19662 | 3.824134 | -2.82341 | 0.013982 | 0.131867 | -3.07134 |
| Adam34    | -0.19729 | 3.232408 | -2.37069 | 0.033311 | 0.200415 | -3.86963 |
| Gm4211    | -0.1973  | 3.421368 | -2.44547 | 0.028914 | 0.188466 | -3.74087 |
| Trim31    | -0.19737 | 3.492869 | -2.63022 | 0.02031  | 0.15828  | -3.41702 |
| P4ha3     | -0.19763 | 3.683411 | -2.99842 | 0.009947 | 0.112243 | -2.75365 |
| Phc2      | -0.19784 | 5.04854  | -2.98812 | 0.010148 | 0.112746 | -2.77245 |
| Lck       | -0.19799 | 3.666304 | -2.4627  | 0.027983 | 0.185039 | -3.71099 |
| Cdk1      | -0.19801 | 3.450962 | -2.89557 | 0.012153 | 0.121746 | -2.94078 |
| Gm5161    | -0.19816 | 4.038776 | -2.85371 | 0.013183 | 0.127671 | -3.0166  |
| Gm11946   | -0.19824 | 3.811851 | -2.84618 | 0.013377 | 0.128749 | -3.03021 |
| Tmprss12  | -0.19825 | 3.333572 | -3.09441 | 0.008247 | 0.102824 | -2.57811 |
| Smg1      | -0.19862 | 8.412082 | -2.23202 | 0.043198 | 0.227136 | -4.10419 |
| Vmn1r143  | -0.19888 | 3.184903 | -2.34164 | 0.035185 | 0.205186 | -3.91923 |
| Nus1      | -0.19889 | 8.516117 | -2.2698  | 0.04026  | 0.219147 | -4.04087 |
| Zfp81     | -0.1993  | 4.200316 | -2.41691 | 0.030524 | 0.193528 | -3.79022 |
| Rpl24     | -0.19948 | 3.420688 | -2.39926 | 0.031561 | 0.196396 | -3.82062 |
| 1700003DC | -0.1995  | 4.260276 | -2.39868 | 0.031595 | 0.196396 | -3.82161 |
| Mpo       | -0.19967 | 3.784117 | -2.20956 | 0.045039 | 0.230768 | -4.14162 |
| Vmn1r232  | -0.19972 | 3.49747  | -2.42986 | 0.029784 | 0.191527 | -3.76787 |
| Btnl2     | -0.19989 | 3.832915 | -2.38034 | 0.03271  | 0.198723 | -3.8531  |
| 1700018C1 | -0.20001 | 3.796234 | -2.47991 | 0.027081 | 0.182091 | -3.68109 |
| Ctnna1    | -0.20063 | 9.894477 | -2.2096  | 0.045036 | 0.230768 | -4.14155 |
| Ces2h     | -0.20077 | 3.399698 | -2.23245 | 0.043164 | 0.227053 | -4.10348 |
| Slc18a2   | -0.2008  | 3.822128 | -2.39188 | 0.032004 | 0.197039 | -3.83329 |
| Trpv6     | -0.20095 | 3.643095 | -2.27156 | 0.040128 | 0.218766 | -4.03791 |
| Igkv4-50  | -0.20102 | 3.362708 | -2.41004 | 0.030924 | 0.194856 | -3.80206 |
| Kctd7     | -0.20128 | 4.37462  | -2.39883 | 0.031587 | 0.196396 | -3.82136 |
| Akap14    | -0.2019  | 3.489217 | -2.40963 | 0.030948 | 0.194856 | -3.80277 |
| Wbp1l     | -0.20205 | 8.282766 | -2.24403 | 0.042243 | 0.224616 | -4.08412 |
| Cdh26     | -0.20208 | 3.936801 | -2.23302 | 0.043118 | 0.226956 | -4.10252 |
| Tspyl2    | -0.20232 | 6.955967 | -2.56282 | 0.023115 | 0.168419 | -3.53603 |
| Prpf31    | -0.20249 | 5.674632 | -2.15805 | 0.049543 | 0.242108 | -4.22681 |
| Olf1r1499 | -0.20252 | 3.2997   | -2.50121 | 0.026004 | 0.178383 | -3.64398 |
| Kat2b     | -0.20256 | 7.963826 | -2.5017  | 0.02598  | 0.178265 | -3.64312 |
| S100a14   | -0.20259 | 3.877789 | -2.47839 | 0.02716  | 0.182237 | -3.68373 |
| Epha8     | -0.20265 | 3.924311 | -2.51851 | 0.025159 | 0.175556 | -3.61375 |
| Cyp2c37   | -0.20267 | 3.331607 | -2.91558 | 0.011689 | 0.120141 | -2.90447 |
| Gm12130   | -0.20273 | 3.342159 | -2.67532 | 0.018621 | 0.152048 | -3.33688 |
| 4930515BC | -0.20278 | 3.456309 | -3.2214  | 0.006435 | 0.090568 | -2.34487 |
| Mmel1     | -0.20288 | 3.806274 | -2.63987 | 0.019937 | 0.156691 | -3.39991 |
| Pdzk1ip1  | -0.20289 | 4.215447 | -2.30015 | 0.038037 | 0.212595 | -3.98967 |
| Them7     | -0.20313 | 4.090654 | -2.66657 | 0.018937 | 0.153337 | -3.35246 |
| Smlr1     | -0.20333 | 3.957011 | -2.17016 | 0.048448 | 0.239687 | -4.20687 |
| Igf2r     | -0.20336 | 8.665575 | -2.50657 | 0.025739 | 0.177204 | -3.63462 |
| Osbpl5    | -0.20345 | 4.693197 | -2.25777 | 0.041175 | 0.221398 | -4.06109 |

|            |          |          |          |          |          |          |
|------------|----------|----------|----------|----------|----------|----------|
| Ggct       | -0.20355 | 4.544712 | -3.26773 | 0.005878 | 0.087084 | -2.25956 |
| Gtsf1l     | -0.20361 | 3.407958 | -3.63316 | 0.002882 | 0.062351 | -1.58562 |
| Tmem132k   | -0.20372 | 3.814972 | -2.2001  | 0.045837 | 0.233121 | -4.15733 |
| Lgi2       | -0.20381 | 3.81053  | -2.46485 | 0.027869 | 0.184701 | -3.70727 |
| Cyp2g1     | -0.20388 | 3.346137 | -3.15902 | 0.007269 | 0.096052 | -2.45956 |
| Npnt       | -0.20404 | 4.115429 | -2.69573 | 0.017902 | 0.148595 | -3.30051 |
| Nipa2      | -0.20434 | 5.116092 | -2.91764 | 0.011642 | 0.12004  | -2.90072 |
| Hmx3       | -0.20448 | 4.247041 | -2.29847 | 0.038157 | 0.21282  | -3.99251 |
| Hcst       | -0.20487 | 3.923199 | -3.05444 | 0.008917 | 0.106777 | -2.65129 |
| Dusp26     | -0.20497 | 4.106498 | -2.57556 | 0.022558 | 0.166143 | -3.51361 |
| Fam132b    | -0.20517 | 3.970574 | -2.3666  | 0.033569 | 0.201237 | -3.87662 |
| Fam19a4    | -0.2053  | 3.927624 | -3.35321 | 0.004974 | 0.080294 | -2.10202 |
| Aurkb      | -0.20537 | 3.868018 | -2.30103 | 0.037974 | 0.212405 | -3.98818 |
| Uchl1os    | -0.20548 | 3.779097 | -2.21504 | 0.044583 | 0.229533 | -4.1325  |
| Olf1r518   | -0.20563 | 3.795378 | -3.00969 | 0.00973  | 0.111011 | -2.73308 |
| Kcnh4      | -0.20573 | 3.663332 | -2.91589 | 0.011682 | 0.120141 | -2.9039  |
| Gm26511    | -0.2058  | 3.839891 | -2.25158 | 0.041653 | 0.222495 | -4.07147 |
| Usp17le    | -0.20621 | 3.656008 | -2.17234 | 0.048253 | 0.239104 | -4.20327 |
| Fam196b    | -0.20631 | 3.782508 | -3.12313 | 0.007797 | 0.099356 | -2.52544 |
| Klhdc9     | -0.20635 | 3.968765 | -2.74529 | 0.016267 | 0.141878 | -3.21186 |
| Tmem61     | -0.20645 | 3.545375 | -3.05094 | 0.008978 | 0.106942 | -2.65769 |
| Dnase1l3   | -0.20656 | 3.436842 | -3.26151 | 0.00595  | 0.087525 | -2.27103 |
| E030013119 | -0.20671 | 3.517331 | -2.54623 | 0.023861 | 0.171255 | -3.56519 |
| 4930502AC  | -0.20681 | 3.846544 | -2.75847 | 0.015857 | 0.13994  | -3.1882  |
| 1700021N2  | -0.20682 | 4.072047 | -3.01246 | 0.009678 | 0.110879 | -2.72802 |
| Ccdc105    | -0.20719 | 3.763757 | -2.81045 | 0.014338 | 0.133449 | -3.09471 |
| Hmgcl      | -0.20734 | 7.72934  | -2.2046  | 0.045456 | 0.231849 | -4.14986 |
| Rmi2       | -0.20734 | 3.721035 | -3.84645 | 0.001906 | 0.051748 | -1.19344 |
| Tmc5       | -0.2076  | 3.859416 | -2.44547 | 0.028914 | 0.188466 | -3.74087 |
| Rgs8       | -0.20788 | 3.982651 | -2.42575 | 0.030017 | 0.192176 | -3.77497 |
| 4930581F2  | -0.20796 | 4.221541 | -3.136   | 0.007604 | 0.098146 | -2.50181 |
| Mapk14     | -0.20806 | 6.339166 | -3.08411 | 0.008415 | 0.103922 | -2.59698 |
| Pygb       | -0.20817 | 11.20256 | -3.02455 | 0.009452 | 0.109319 | -2.70595 |
| 2310015A1  | -0.2082  | 5.175035 | -2.93161 | 0.01133  | 0.118849 | -2.87534 |
| Nr5a1      | -0.20839 | 3.678928 | -3.13485 | 0.007621 | 0.09819  | -2.50392 |
| Txn14b     | -0.20864 | 4.818207 | -2.35146 | 0.034541 | 0.203418 | -3.9025  |
| Gm5919     | -0.20872 | 3.700166 | -2.49229 | 0.02645  | 0.179607 | -3.65952 |
| Ppt1       | -0.2089  | 8.980509 | -3.33463 | 0.005158 | 0.081722 | -2.13628 |
| Vopp1      | -0.20926 | 4.431668 | -2.47388 | 0.027394 | 0.182969 | -3.69157 |
| Usp26      | -0.2096  | 3.513362 | -3.1382  | 0.007571 | 0.098031 | -2.49778 |
| Gm4454     | -0.20974 | 3.404162 | -2.17368 | 0.048134 | 0.238886 | -4.20107 |
| Tmem248    | -0.20981 | 7.526116 | -2.18401 | 0.047223 | 0.236695 | -4.18399 |
| Platr26    | -0.20995 | 3.97071  | -2.29363 | 0.038504 | 0.213855 | -4.00069 |
| Susd4      | -0.21005 | 4.111608 | -2.56749 | 0.02291  | 0.167495 | -3.52782 |
| Fibcd1     | -0.2101  | 4.422455 | -2.58736 | 0.022053 | 0.16444  | -3.49281 |
| Nucks1     | -0.21014 | 7.490472 | -2.27051 | 0.040206 | 0.219002 | -4.03967 |
| LOC102633  | -0.21018 | 3.619683 | -3.46956 | 0.003963 | 0.071814 | -1.88737 |
| Ncan       | -0.21024 | 4.037703 | -2.4014  | 0.031433 | 0.196141 | -3.81693 |



|                        |          |          |          |          |          |          |
|------------------------|----------|----------|----------|----------|----------|----------|
| Gm11725                | -0.21038 | 3.553094 | -3.26681 | 0.005889 | 0.087093 | -2.26126 |
| Agap3                  | -0.21057 | 5.308126 | -2.23434 | 0.043012 | 0.226835 | -4.10032 |
| A230056P1              | -0.21066 | 3.851374 | -2.26835 | 0.040369 | 0.219225 | -4.04331 |
| Trem1                  | -0.21081 | 4.2333   | -3.25214 | 0.00606  | 0.0881   | -2.28829 |
| Ttc34                  | -0.21107 | 4.294205 | -3.272   | 0.005829 | 0.086626 | -2.25171 |
| Cacng5                 | -0.21117 | 3.845503 | -2.39533 | 0.031796 | 0.196662 | -3.82737 |
| Olf142                 | -0.21192 | 3.084794 | -2.94539 | 0.01103  | 0.116978 | -2.85028 |
| Lhfp14                 | -0.21196 | 4.064265 | -2.93085 | 0.011346 | 0.118866 | -2.87672 |
| Kazn                   | -0.2122  | 4.118512 | -2.52369 | 0.024912 | 0.174974 | -3.60469 |
| I730030J21             | -0.21227 | 3.509749 | -2.63825 | 0.019999 | 0.156933 | -3.40279 |
| Dnase1                 | -0.2124  | 3.715986 | -2.93022 | 0.01136  | 0.118913 | -2.87787 |
| Wdr92                  | -0.21254 | 5.427419 | -2.32697 | 0.03617  | 0.207637 | -3.94419 |
| 1810046KC              | -0.21265 | 3.798459 | -2.21584 | 0.044517 | 0.229533 | -4.13117 |
| Gdpd3                  | -0.21266 | 3.969925 | -2.28016 | 0.039488 | 0.216875 | -4.02342 |
| Tenm1                  | -0.21294 | 3.501926 | -3.2638  | 0.005923 | 0.087289 | -2.26682 |
| Ralbp1                 | -0.21308 | 6.212796 | -2.35108 | 0.034566 | 0.203481 | -3.90314 |
| Wwp1                   | -0.21311 | 9.282118 | -2.63993 | 0.019934 | 0.156691 | -3.3998  |
| Mfsd7c                 | -0.21326 | 4.271461 | -2.57191 | 0.022716 | 0.166882 | -3.52004 |
| Tnfrsf18               | -0.21329 | 4.368942 | -2.28529 | 0.03911  | 0.215631 | -4.01477 |
| Krt34                  | -0.21349 | 3.86477  | -2.96871 | 0.01054  | 0.114616 | -2.80782 |
| Pak1                   | -0.21354 | 4.026694 | -2.59986 | 0.02153  | 0.162659 | -3.47074 |
| Aldh1a3                | -0.21359 | 3.723041 | -2.26862 | 0.040348 | 0.219225 | -4.04285 |
| Hcrtr1                 | -0.21387 | 3.668291 | -2.57909 | 0.022406 | 0.165796 | -3.50739 |
| 10-Mar                 | -0.21388 | 3.678299 | -2.6748  | 0.01864  | 0.152077 | -3.33782 |
| Drd5                   | -0.21423 | 4.107566 | -3.27134 | 0.005837 | 0.086679 | -2.25291 |
| Hpse2                  | -0.21441 | 3.616999 | -2.42012 | 0.030339 | 0.193043 | -3.78469 |
| Gm10684                | -0.21446 | 3.356556 | -3.41014 | 0.004451 | 0.076357 | -1.997   |
| Kcnj4                  | -0.21447 | 4.080753 | -2.47975 | 0.027089 | 0.182091 | -3.68136 |
| Cxcr5                  | -0.21464 | 3.809101 | -2.37332 | 0.033146 | 0.199907 | -3.86513 |
| Ints8                  | -0.21503 | 6.320543 | -2.43038 | 0.029754 | 0.191482 | -3.76698 |
| Tmem8c                 | -0.21503 | 3.6765   | -3.05014 | 0.008992 | 0.106956 | -2.65916 |
| Gse1                   | -0.2151  | 4.966017 | -2.5525  | 0.023576 | 0.170415 | -3.55416 |
| Olf934                 | -0.21513 | 3.328309 | -3.56482 | 0.003292 | 0.066281 | -1.71162 |
| Spats1                 | -0.21578 | 3.725689 | -3.13368 | 0.007638 | 0.098235 | -2.50607 |
| Gdf5                   | -0.21581 | 4.02084  | -2.55286 | 0.02356  | 0.170415 | -3.55354 |
| Mgat1                  | -0.21598 | 4.812256 | -2.3392  | 0.035348 | 0.205554 | -3.9234  |
| 4933415F2              | -0.21599 | 3.818114 | -2.31469 | 0.037014 | 0.210327 | -3.96505 |
| Tsc22d3                | -0.21632 | 6.618401 | -3.13085 | 0.007681 | 0.098612 | -2.51127 |
| Mroh4                  | -0.21656 | 3.493934 | -2.91204 | 0.011769 | 0.120438 | -2.91089 |
| Plet1                  | -0.21668 | 4.323302 | -2.82687 | 0.013888 | 0.131622 | -3.06508 |
| Ccdc67                 | -0.2167  | 3.964159 | -2.78472 | 0.015071 | 0.137043 | -3.14105 |
| Rpl7l1                 | -0.21693 | 4.719011 | -2.19997 | 0.045848 | 0.23313  | -4.15755 |
| Psg29                  | -0.2172  | 3.901572 | -3.4957  | 0.003766 | 0.070031 | -1.83912 |
| Mefv                   | -0.21721 | 3.474808 | -2.56294 | 0.02311  | 0.168419 | -3.53582 |
| Pfkl                   | -0.21724 | 7.197693 | -2.45509 | 0.02839  | 0.186772 | -3.7242  |
| Gucy2c                 | -0.21729 | 3.772458 | -2.16071 | 0.049301 | 0.241398 | -4.22244 |
| Fcor                   | -0.2174  | 3.91905  | -2.86065 | 0.013006 | 0.126701 | -3.00404 |
| Igkv16-10 <sup>L</sup> | -0.21743 | 3.455249 | -2.20155 | 0.045714 | 0.232686 | -4.15493 |

|           |          |          |          |          |          |          |
|-----------|----------|----------|----------|----------|----------|----------|
| 4930470P1 | -0.21751 | 3.390107 | -3.70164 | 0.002523 | 0.058677 | -1.4595  |
| Gm16835   | -0.21751 | 3.621957 | -2.18855 | 0.046828 | 0.23567  | -4.17648 |
| Cnot6l    | -0.21766 | 7.906633 | -2.23712 | 0.04279  | 0.226334 | -4.09568 |
| Olf1r536  | -0.21782 | 3.995258 | -2.60834 | 0.021183 | 0.161732 | -3.45576 |
| Gm5396    | -0.21798 | 4.656959 | -2.30361 | 0.037791 | 0.212306 | -3.98382 |
| 4932418E2 | -0.21829 | 3.780585 | -2.50891 | 0.025625 | 0.176807 | -3.63054 |
| Mesdc2    | -0.21832 | 7.611871 | -2.59248 | 0.021837 | 0.163665 | -3.48377 |
| Esp38     | -0.21849 | 3.267137 | -2.95596 | 0.010805 | 0.115914 | -2.83104 |
| Dscaml1   | -0.21854 | 3.725449 | -2.80844 | 0.014394 | 0.13377  | -3.09833 |
| Gm6346    | -0.21859 | 3.373858 | -2.23347 | 0.043082 | 0.226909 | -4.10177 |
| Rbm28     | -0.21864 | 5.56939  | -2.65765 | 0.019266 | 0.154199 | -3.36832 |
| Ccl22     | -0.21866 | 3.539027 | -3.04132 | 0.009148 | 0.108038 | -2.6753  |
| Unc5c     | -0.2187  | 3.846622 | -3.52308 | 0.003571 | 0.068153 | -1.78862 |
| Sync      | -0.21884 | 8.102169 | -2.30469 | 0.037715 | 0.212125 | -3.98199 |
| LOC102637 | -0.21896 | 4.608132 | -2.97167 | 0.010479 | 0.114308 | -2.80243 |
| Zfp62     | -0.21905 | 5.907077 | -2.22962 | 0.043391 | 0.227575 | -4.10819 |
| Rgs14     | -0.21906 | 3.886241 | -2.54826 | 0.023769 | 0.170986 | -3.56163 |
| Prss8     | -0.21907 | 4.157391 | -2.46494 | 0.027864 | 0.184701 | -3.70711 |
| Rbm8a     | -0.21918 | 4.171821 | -2.17436 | 0.048074 | 0.238735 | -4.19994 |
| Tbx1      | -0.21934 | 4.204619 | -2.71814 | 0.017144 | 0.145608 | -3.26048 |
| BB283400  | -0.21941 | 3.537103 | -2.56628 | 0.022963 | 0.1677   | -3.52995 |
| Lrrc31    | -0.21941 | 3.545403 | -2.98268 | 0.010256 | 0.113121 | -2.78236 |
| Fbxw18    | -0.21956 | 3.238202 | -2.96787 | 0.010557 | 0.114616 | -2.80935 |
| 3110035E1 | -0.22011 | 3.8849   | -2.1913  | 0.04659  | 0.235174 | -4.17192 |
| Iqcf6     | -0.22027 | 3.859187 | -3.18944 | 0.00685  | 0.093296 | -2.40365 |
| Gm1661    | -0.2203  | 3.831987 | -2.29697 | 0.038264 | 0.212997 | -3.99504 |
| Ube2c     | -0.22035 | 3.940526 | -2.46191 | 0.028025 | 0.185244 | -3.71238 |
| Klk9      | -0.22046 | 3.932414 | -3.09621 | 0.008218 | 0.102667 | -2.57479 |
| Pigr      | -0.22053 | 3.885586 | -3.08178 | 0.008453 | 0.104078 | -2.60123 |
| Olf1r323  | -0.221   | 3.989922 | -2.51693 | 0.025236 | 0.175619 | -3.61652 |
| 2310065F0 | -0.22108 | 3.65191  | -2.46961 | 0.027617 | 0.183821 | -3.699   |
| Prph2     | -0.22117 | 4.124605 | -2.29524 | 0.038389 | 0.213356 | -3.99797 |
| Flot2     | -0.22118 | 7.47307  | -2.53553 | 0.024354 | 0.17274  | -3.58394 |
| Ccdc114   | -0.22136 | 3.740802 | -2.8399  | 0.013541 | 0.129726 | -3.04156 |
| Asphd2    | -0.22139 | 4.180318 | -2.37769 | 0.032874 | 0.198988 | -3.85763 |
| Klk12     | -0.22172 | 3.874247 | -2.33631 | 0.035541 | 0.206193 | -3.92832 |
| Rnf11     | -0.22184 | 8.604574 | -2.15841 | 0.049511 | 0.242005 | -4.22623 |
| Caprin1   | -0.22199 | 5.745612 | -2.43759 | 0.02935  | 0.189951 | -3.75452 |
| Cadm2     | -0.22204 | 3.62018  | -3.00135 | 0.00989  | 0.111856 | -2.7483  |
| Esp1      | -0.22215 | 3.882657 | -3.14473 | 0.007475 | 0.097601 | -2.48579 |
| Rpl39l    | -0.22225 | 3.988649 | -2.18328 | 0.047287 | 0.236834 | -4.1852  |
| Napsa     | -0.22228 | 3.840439 | -2.26947 | 0.040285 | 0.219147 | -4.04143 |
| Trim43b   | -0.22233 | 3.386476 | -2.23003 | 0.043359 | 0.227575 | -4.10752 |
| Loxhd1    | -0.22254 | 3.873676 | -2.57565 | 0.022554 | 0.166143 | -3.51345 |
| 5430416N0 | -0.22261 | 3.678085 | -3.18198 | 0.00695  | 0.094111 | -2.41736 |
| AU018091  | -0.22261 | 3.666851 | -2.29913 | 0.03811  | 0.212759 | -3.99141 |
| Cmtm7     | -0.22278 | 5.129171 | -2.65908 | 0.019213 | 0.154113 | -3.36579 |
| A930005H0 | -0.2229  | 4.704468 | -2.38168 | 0.032628 | 0.198536 | -3.85081 |

|           |          |          |          |          |          |          |
|-----------|----------|----------|----------|----------|----------|----------|
| 4930555B1 | -0.22291 | 3.468625 | -2.70791 | 0.017486 | 0.147206 | -3.27876 |
| Zfp503    | -0.22295 | 4.313816 | -3.30538 | 0.005461 | 0.083865 | -2.1902  |
| Ms4a15    | -0.22299 | 3.906899 | -2.25468 | 0.041413 | 0.221728 | -4.06627 |
| Kap       | -0.22313 | 3.3357   | -2.84849 | 0.013317 | 0.128471 | -3.02603 |
| Arl13a    | -0.22318 | 3.542787 | -2.71061 | 0.017395 | 0.146747 | -3.27393 |
| Duox2     | -0.22324 | 3.688753 | -2.50621 | 0.025757 | 0.17724  | -3.63524 |
| Npc1l1    | -0.2233  | 4.177251 | -2.36486 | 0.03368  | 0.201461 | -3.8796  |
| Gm5134    | -0.22383 | 3.623354 | -2.46687 | 0.027762 | 0.184384 | -3.70375 |
| Cfc1      | -0.2239  | 4.110706 | -2.76365 | 0.015699 | 0.139138 | -3.17892 |
| Extl3     | -0.2239  | 7.537462 | -2.25329 | 0.04152  | 0.222167 | -4.0686  |
| Zcchc12   | -0.2242  | 3.380008 | -2.82751 | 0.013871 | 0.131617 | -3.06394 |
| Ppp1r17   | -0.2244  | 3.615339 | -2.45914 | 0.028173 | 0.186024 | -3.71718 |
| Col11a2   | -0.22442 | 3.9437   | -3.50274 | 0.003715 | 0.06965  | -1.82615 |
| Tusc1     | -0.22448 | 4.685287 | -2.24066 | 0.042509 | 0.22542  | -4.08975 |
| Rps6ka1   | -0.22454 | 4.575716 | -2.54329 | 0.023996 | 0.171813 | -3.57034 |
| Inhbc     | -0.22455 | 3.889026 | -3.56163 | 0.003312 | 0.0664   | -1.7175  |
| Gm5334    | -0.22461 | 3.403566 | -3.52951 | 0.003526 | 0.067927 | -1.77674 |
| Gm12121   | -0.22484 | 4.204473 | -2.42098 | 0.030289 | 0.192825 | -3.78319 |
| Slc25a54  | -0.22495 | 3.4143   | -2.63111 | 0.020276 | 0.158158 | -3.41544 |
| Kars      | -0.22506 | 8.825948 | -2.47454 | 0.027359 | 0.182836 | -3.69042 |
| Defb33    | -0.22506 | 3.972185 | -2.50998 | 0.025572 | 0.176732 | -3.62866 |
| Lman1l    | -0.22528 | 4.105949 | -3.18817 | 0.006867 | 0.093337 | -2.40599 |
| Mapkapk3  | -0.22535 | 6.888302 | -2.2397  | 0.042585 | 0.225646 | -4.09136 |
| 5730435O  | -0.2254  | 4.871675 | -2.65526 | 0.019355 | 0.154545 | -3.37257 |
| Rprml     | -0.22576 | 4.425532 | -2.32735 | 0.036144 | 0.207561 | -3.94355 |
| Cers4     | -0.22628 | 7.325823 | -2.58279 | 0.022247 | 0.165254 | -3.50087 |
| Fign      | -0.22631 | 3.992152 | -2.32419 | 0.036359 | 0.208317 | -3.94892 |
| Cxcl10    | -0.22631 | 3.864221 | -2.42426 | 0.030102 | 0.19235  | -3.77754 |
| Glb1l     | -0.22645 | 3.807919 | -3.13927 | 0.007555 | 0.09798  | -2.49582 |
| Cyp4a30b  | -0.22665 | 3.34875  | -2.31931 | 0.036694 | 0.209175 | -3.95721 |
| Rusc2     | -0.22681 | 5.855506 | -2.24727 | 0.041989 | 0.223713 | -4.07869 |
| Sbpl      | -0.22714 | 3.725866 | -2.59974 | 0.021535 | 0.162659 | -3.47096 |
| Bok       | -0.22721 | 4.847332 | -2.45248 | 0.028532 | 0.187051 | -3.72873 |
| Rab9b     | -0.22738 | 4.057858 | -2.53272 | 0.024485 | 0.173076 | -3.58887 |
| Rln3      | -0.22756 | 4.141756 | -2.3404  | 0.035268 | 0.205425 | -3.92135 |
| Gm13274   | -0.2276  | 4.295219 | -2.59044 | 0.021923 | 0.163948 | -3.48737 |
| Ccdc63    | -0.22761 | 4.09176  | -2.34515 | 0.034954 | 0.204726 | -3.91326 |
| Gm15423   | -0.22774 | 3.945947 | -3.34582 | 0.005046 | 0.080883 | -2.11564 |
| Ephx2     | -0.22782 | 10.65171 | -2.16985 | 0.048477 | 0.239731 | -4.20739 |
| Cpvl      | -0.22788 | 3.526766 | -3.89009 | 0.001753 | 0.049964 | -1.11348 |
| Dupd1     | -0.22799 | 3.6946   | -2.21771 | 0.044363 | 0.229137 | -4.12806 |
| Ovol2     | -0.22805 | 3.955634 | -2.42582 | 0.030012 | 0.192176 | -3.77484 |
| Map3k11   | -0.22814 | 6.153185 | -2.24682 | 0.042024 | 0.223838 | -4.07944 |
| Wdr86     | -0.22827 | 4.133586 | -2.72336 | 0.016972 | 0.144917 | -3.25113 |
| Tacr1     | -0.22856 | 3.987691 | -2.24517 | 0.042153 | 0.22425  | -4.0822  |
| Slc7a10   | -0.2292  | 4.088687 | -2.17442 | 0.048069 | 0.238735 | -4.19984 |
| Mex3a     | -0.22947 | 4.115248 | -3.03629 | 0.009238 | 0.108326 | -2.68449 |
| Xylb      | -0.22951 | 3.752353 | -2.62631 | 0.020464 | 0.158828 | -3.42395 |

|             |          |          |          |          |          |          |
|-------------|----------|----------|----------|----------|----------|----------|
| A930031H:   | -0.2297  | 3.611062 | -3.72054 | 0.002432 | 0.057534 | -1.42473 |
| Smpd3       | -0.22997 | 4.192958 | -2.74999 | 0.01612  | 0.141046 | -3.20343 |
| BC068281    | -0.23007 | 4.475462 | -2.33829 | 0.035408 | 0.205665 | -3.92495 |
| Mir877      | -0.23007 | 4.001502 | -2.5672  | 0.022922 | 0.167501 | -3.52832 |
| D5Erttd579c | -0.23008 | 7.818068 | -2.54777 | 0.023791 | 0.170986 | -3.56247 |
| Dnd1        | -0.23011 | 4.058285 | -2.68829 | 0.018161 | 0.149792 | -3.31377 |
| F11         | -0.23041 | 3.816598 | -2.16819 | 0.048625 | 0.239939 | -4.21012 |
| Akr1d1      | -0.23042 | 3.380478 | -2.82084 | 0.014052 | 0.13227  | -3.07597 |
| Akt1s1      | -0.23054 | 5.591112 | -2.30512 | 0.037684 | 0.212002 | -3.98126 |
| Arrdc5      | -0.23058 | 3.560815 | -2.69968 | 0.017766 | 0.147997 | -3.29345 |
| Cryaa       | -0.23071 | 4.01534  | -2.31366 | 0.037086 | 0.21051  | -3.9668  |
| Fam174a     | -0.23083 | 6.203271 | -3.01115 | 0.009703 | 0.110901 | -2.73043 |
| Syn1        | -0.23087 | 4.052207 | -2.1733  | 0.048168 | 0.238967 | -4.20169 |
| Gm9736      | -0.23098 | 7.454007 | -2.18954 | 0.046742 | 0.235607 | -4.17484 |
| Gm6211      | -0.231   | 3.749407 | -2.91004 | 0.011815 | 0.120438 | -2.91453 |
| Ranbp3l     | -0.23116 | 3.598122 | -3.64822 | 0.002799 | 0.061834 | -1.55787 |
| Gm4792      | -0.23132 | 3.57599  | -3.29175 | 0.005608 | 0.08512  | -2.21531 |
| Gm7337      | -0.23139 | 4.46552  | -2.75437 | 0.015984 | 0.140608 | -3.19558 |
| Rasgef1a    | -0.23145 | 3.948076 | -2.2163  | 0.04448  | 0.229506 | -4.13041 |
| Gm13056     | -0.23147 | 4.018785 | -2.35698 | 0.034184 | 0.202542 | -3.89307 |
| Sag         | -0.23158 | 3.739273 | -2.27497 | 0.039873 | 0.217902 | -4.03217 |
| Gpr61       | -0.23169 | 3.832969 | -3.46673 | 0.003985 | 0.072001 | -1.89258 |
| Tbx4        | -0.23172 | 3.896105 | -2.62791 | 0.020401 | 0.158686 | -3.42111 |
| Gm26911     | -0.23183 | 3.977837 | -2.64638 | 0.019688 | 0.155717 | -3.38835 |
| Mpzl1       | -0.23183 | 5.889455 | -3.03739 | 0.009218 | 0.108303 | -2.68247 |
| Mbl1        | -0.23234 | 3.615356 | -2.32744 | 0.036138 | 0.207561 | -3.94341 |
| Frmd4b      | -0.2324  | 6.476735 | -2.34397 | 0.035032 | 0.204924 | -3.91527 |
| Dok7        | -0.23242 | 6.326664 | -2.28999 | 0.038768 | 0.214695 | -4.00684 |
| Gm38424     | -0.23255 | 3.862405 | -2.74468 | 0.016286 | 0.141919 | -3.21295 |
| Txndc17     | -0.23264 | 8.837457 | -2.53653 | 0.024308 | 0.17274  | -3.5822  |
| Tigar       | -0.23277 | 7.197415 | -2.24375 | 0.042265 | 0.224621 | -4.08459 |
| 2610035F2   | -0.23288 | 3.824805 | -3.17658 | 0.007024 | 0.094671 | -2.42729 |
| Trpm6       | -0.23298 | 3.56092  | -2.36494 | 0.033674 | 0.201461 | -3.87946 |
| Olf523      | -0.23315 | 4.047648 | -2.24971 | 0.041798 | 0.22298  | -4.0746  |
| Xrn1        | -0.23324 | 6.659746 | -2.36839 | 0.033456 | 0.200818 | -3.87357 |
| Gm26708     | -0.23337 | 3.626885 | -2.25745 | 0.041199 | 0.221401 | -4.06161 |
| 2210039BC   | -0.23347 | 3.678592 | -3.37819 | 0.004737 | 0.07842  | -2.05594 |
| Pom121l2    | -0.23349 | 4.007278 | -2.8439  | 0.013437 | 0.12907  | -3.03432 |
| Tsr3        | -0.23359 | 4.961819 | -2.85798 | 0.013074 | 0.126961 | -3.00887 |
| Mir1964     | -0.23382 | 4.776808 | -2.40143 | 0.031431 | 0.196141 | -3.81687 |
| Trmt1       | -0.23391 | 5.411363 | -2.33363 | 0.03572  | 0.206463 | -3.93288 |
| Ern2        | -0.23424 | 3.771064 | -2.32556 | 0.036266 | 0.207973 | -3.94659 |
| Arl6ip5     | -0.23443 | 9.18259  | -2.46348 | 0.027941 | 0.18497  | -3.70964 |
| Gnb1l       | -0.23445 | 4.057905 | -2.78851 | 0.014961 | 0.136388 | -3.13422 |
| Zkscan8     | -0.23457 | 5.453515 | -2.32325 | 0.036424 | 0.208496 | -3.95053 |
| Hdac2       | -0.23462 | 7.140015 | -2.37057 | 0.033319 | 0.200415 | -3.86983 |
| Gm6987      | -0.23466 | 3.532574 | -2.97529 | 0.010405 | 0.114104 | -2.79583 |
| Olf433      | -0.23487 | 3.595779 | -3.36063 | 0.004902 | 0.079707 | -2.08833 |

|           |          |          |          |          |          |          |
|-----------|----------|----------|----------|----------|----------|----------|
| 4930465M: | -0.23508 | 3.556125 | -2.43435 | 0.029531 | 0.190502 | -3.76011 |
| Gm5475    | -0.23511 | 3.539344 | -2.78492 | 0.015065 | 0.137039 | -3.14068 |
| Fam131c   | -0.23513 | 4.027291 | -3.60767 | 0.003028 | 0.06362  | -1.6326  |
| Ccnj      | -0.23515 | 4.87266  | -2.25254 | 0.041578 | 0.222269 | -4.06985 |
| Sgcz      | -0.23522 | 3.703598 | -3.13708 | 0.007588 | 0.09806  | -2.49983 |
| Capns2    | -0.23531 | 3.71511  | -2.70857 | 0.017464 | 0.147117 | -3.27757 |
| Luc7l3    | -0.23543 | 8.082482 | -2.31255 | 0.037163 | 0.21051  | -3.96867 |
| Cyp2d26   | -0.23552 | 3.534259 | -2.21265 | 0.044782 | 0.229968 | -4.13648 |
| Vps18     | -0.23554 | 4.705958 | -2.71669 | 0.017192 | 0.145849 | -3.26305 |
| Igkv1-99  | -0.23561 | 4.13415  | -2.59131 | 0.021887 | 0.163799 | -3.48584 |
| Ankrd53   | -0.23561 | 3.814813 | -2.67294 | 0.018706 | 0.152222 | -3.34112 |
| Muc20     | -0.23571 | 3.780012 | -2.40963 | 0.030947 | 0.194856 | -3.80276 |
| Klhl29    | -0.23578 | 4.117788 | -2.58488 | 0.022158 | 0.164828 | -3.49718 |
| Sry       | -0.23581 | 3.754571 | -2.73645 | 0.016548 | 0.142986 | -3.2277  |
| Gm11732   | -0.23582 | 4.018892 | -2.70653 | 0.017533 | 0.147342 | -3.28122 |
| Elfn2     | -0.23587 | 4.424869 | -2.80536 | 0.01448  | 0.13377  | -3.10388 |
| Tmod2     | -0.23596 | 4.399599 | -2.36098 | 0.033927 | 0.202007 | -3.88625 |
| Wnt10a    | -0.23622 | 4.218643 | -2.84069 | 0.013521 | 0.129716 | -3.04014 |
| Sgcb      | -0.2364  | 9.523404 | -2.32126 | 0.03656  | 0.208793 | -3.95389 |
| Mir455    | -0.23643 | 3.849152 | -2.34176 | 0.035178 | 0.205186 | -3.91903 |
| Sbf1      | -0.2365  | 6.546787 | -2.58338 | 0.022222 | 0.165153 | -3.49982 |
| Sfpq      | -0.2365  | 7.300042 | -2.73484 | 0.016599 | 0.14331  | -3.23059 |
| Ctrl      | -0.23665 | 3.884688 | -2.53525 | 0.024367 | 0.17274  | -3.58444 |
| Ggnbp2os  | -0.2367  | 4.477354 | -2.62077 | 0.020682 | 0.159767 | -3.43375 |
| Ubqln3    | -0.23686 | 3.803772 | -2.80729 | 0.014426 | 0.13377  | -3.1004  |
| Capn15    | -0.23714 | 4.341882 | -2.26949 | 0.040283 | 0.219147 | -4.04138 |
| Glul      | -0.23737 | 10.94251 | -2.24396 | 0.042249 | 0.224616 | -4.08424 |
| Abhd13    | -0.23737 | 5.494758 | -2.52348 | 0.024922 | 0.174974 | -3.60505 |
| Grm7      | -0.23788 | 3.435257 | -3.66622 | 0.002703 | 0.061038 | -1.52472 |
| Gab1      | -0.238   | 8.649228 | -2.48663 | 0.026737 | 0.180842 | -3.66939 |
| Arih2     | -0.23824 | 8.561869 | -2.33455 | 0.035658 | 0.206402 | -3.93131 |
| S100pbp   | -0.23825 | 6.428399 | -3.5234  | 0.003568 | 0.068153 | -1.78802 |
| Olfr1494  | -0.23838 | 3.423778 | -2.78349 | 0.015107 | 0.137268 | -3.14325 |
| Erich5    | -0.23844 | 4.261312 | -2.2628  | 0.04079  | 0.220393 | -4.05263 |
| Figla     | -0.23849 | 3.554662 | -3.73901 | 0.002347 | 0.05703  | -1.39075 |
| Ston2     | -0.23858 | 5.1089   | -2.69752 | 0.01784  | 0.148329 | -3.2973  |
| Tbx22     | -0.2386  | 3.494876 | -2.8139  | 0.014242 | 0.133007 | -3.08849 |
| Olfr239   | -0.23863 | 3.769928 | -2.56314 | 0.023101 | 0.168419 | -3.53548 |
| AU015228  | -0.23868 | 3.590864 | -3.18858 | 0.006861 | 0.093312 | -2.40523 |
| Mir3067   | -0.23876 | 3.84278  | -2.89518 | 0.012162 | 0.121746 | -2.94149 |
| Trem14    | -0.23906 | 3.99717  | -2.3972  | 0.031684 | 0.196427 | -3.82416 |
| Olfr681   | -0.23923 | 3.441337 | -2.53667 | 0.024301 | 0.17274  | -3.58195 |
| Tshr      | -0.23929 | 3.58991  | -2.83003 | 0.013803 | 0.131294 | -3.05939 |
| Gm11681   | -0.23952 | 3.944694 | -2.33085 | 0.035907 | 0.206968 | -3.93761 |
| Gm10653   | -0.23984 | 3.617059 | -2.28254 | 0.039313 | 0.216368 | -4.01942 |
| Nrip3     | -0.24002 | 3.513045 | -2.76111 | 0.015777 | 0.139574 | -3.18347 |
| Cdh2      | -0.24022 | 11.06609 | -3.80836 | 0.002052 | 0.053574 | -1.26333 |
| Morn3     | -0.24029 | 3.967746 | -2.52228 | 0.024979 | 0.174974 | -3.60716 |

|           |          |          |          |          |          |          |
|-----------|----------|----------|----------|----------|----------|----------|
| Csf3      | -0.24036 | 4.062276 | -2.39058 | 0.032083 | 0.197227 | -3.83552 |
| Lypd3     | -0.24044 | 4.290911 | -2.81254 | 0.01428  | 0.133224 | -3.09094 |
| 5830432E0 | -0.24049 | 4.442095 | -2.90033 | 0.012041 | 0.121279 | -2.93214 |
| C330013E1 | -0.2409  | 4.52213  | -2.39354 | 0.031904 | 0.197038 | -3.83045 |
| Tpgs1     | -0.24099 | 7.271759 | -2.78025 | 0.015202 | 0.137531 | -3.14909 |
| Fancf     | -0.24107 | 3.857981 | -2.78132 | 0.015171 | 0.137442 | -3.14716 |
| Cpne6     | -0.24114 | 4.759474 | -3.1006  | 0.008148 | 0.102306 | -2.56675 |
| Dclk3     | -0.24118 | 3.899999 | -2.19421 | 0.04634  | 0.234481 | -4.1671  |
| Gm11608   | -0.24126 | 3.507384 | -2.81645 | 0.014172 | 0.1329   | -3.08389 |
| Gm11938   | -0.24129 | 4.077599 | -2.19035 | 0.046673 | 0.235447 | -4.17351 |
| 4921525O  | -0.24153 | 3.64071  | -2.95119 | 0.010906 | 0.116412 | -2.83972 |
| Fxyd7     | -0.24206 | 4.418198 | -2.7704  | 0.015495 | 0.138565 | -3.16678 |
| Tjp3      | -0.24215 | 4.191098 | -2.796   | 0.014745 | 0.135117 | -3.12074 |
| Ahsa2     | -0.24232 | 6.370538 | -2.18905 | 0.046785 | 0.23567  | -4.17565 |
| Spop      | -0.24236 | 9.288649 | -4.03836 | 0.001318 | 0.043116 | -0.84274 |
| Slc16a1   | -0.24245 | 9.955275 | -2.72658 | 0.016866 | 0.144484 | -3.24536 |
| Dbx1      | -0.24265 | 3.716812 | -3.19553 | 0.006769 | 0.09302  | -2.39245 |
| Dock10    | -0.24268 | 5.090902 | -2.59155 | 0.021876 | 0.163799 | -3.48541 |
| Gm8094    | -0.24362 | 3.495949 | -2.25466 | 0.041414 | 0.221728 | -4.0663  |
| Crym      | -0.24365 | 4.293054 | -2.34703 | 0.03483  | 0.204363 | -3.91005 |
| Tmem119   | -0.24373 | 3.865684 | -3.03256 | 0.009306 | 0.108712 | -2.6913  |
| Traf3ip3  | -0.24385 | 3.822169 | -2.80611 | 0.014459 | 0.13377  | -3.10254 |
| Gdf9      | -0.24385 | 3.698795 | -2.29685 | 0.038273 | 0.212999 | -3.99525 |
| Grik4     | -0.24406 | 3.872109 | -3.16053 | 0.007248 | 0.095893 | -2.45677 |
| Slc1a4    | -0.24433 | 3.978745 | -2.88323 | 0.012448 | 0.123436 | -2.96315 |
| Mbl2      | -0.24451 | 3.593238 | -2.7979  | 0.014691 | 0.134815 | -3.11732 |
| Gjb2      | -0.24462 | 3.56527  | -3.08803 | 0.008351 | 0.103469 | -2.58979 |
| Magee1    | -0.24491 | 4.044861 | -3.10293 | 0.008111 | 0.102043 | -2.56248 |
| Klk10     | -0.24493 | 4.189711 | -2.17565 | 0.04796  | 0.238399 | -4.19782 |
| 6330403AC | -0.24496 | 4.077062 | -2.25964 | 0.041031 | 0.221123 | -4.05795 |
| Crygs     | -0.24503 | 3.519899 | -3.34538 | 0.005051 | 0.0809   | -2.11646 |
| Mir760    | -0.24539 | 3.996446 | -2.35    | 0.034636 | 0.203657 | -3.90499 |
| 9130019O  | -0.24542 | 3.567395 | -2.71847 | 0.017133 | 0.145565 | -3.25988 |
| 4930509E1 | -0.24555 | 4.506946 | -2.19095 | 0.046621 | 0.235233 | -4.17251 |
| LOC10263  | -0.24588 | 3.930364 | -2.24097 | 0.042485 | 0.22534  | -4.08924 |
| Odf3      | -0.246   | 3.656052 | -2.19564 | 0.046217 | 0.234242 | -4.16474 |
| Frmpd1    | -0.24633 | 3.760378 | -2.96485 | 0.010619 | 0.11483  | -2.81485 |
| Slc25a47  | -0.24649 | 4.812953 | -2.41241 | 0.030785 | 0.194616 | -3.79798 |
| Cyp2b10   | -0.24652 | 3.585724 | -2.39024 | 0.032104 | 0.197255 | -3.8361  |
| Gm26847   | -0.24667 | 4.452025 | -3.28481 | 0.005685 | 0.085618 | -2.22811 |
| Dmrtc1a   | -0.2467  | 4.031108 | -3.72704 | 0.002402 | 0.057456 | -1.41277 |
| Twist1    | -0.24677 | 4.148265 | -2.20671 | 0.045279 | 0.231348 | -4.14636 |
| Vax2      | -0.24691 | 4.054606 | -2.97451 | 0.010421 | 0.114162 | -2.79726 |
| AI314278  | -0.24701 | 4.468131 | -2.35937 | 0.03403  | 0.202243 | -3.88898 |
| Syt16     | -0.24701 | 3.80138  | -2.37204 | 0.033227 | 0.200295 | -3.86732 |
| 2410131K1 | -0.24738 | 6.201345 | -2.54287 | 0.024015 | 0.171851 | -3.57107 |
| Mlc1      | -0.24738 | 3.772388 | -2.66645 | 0.018942 | 0.153337 | -3.35268 |
| Zbtb33    | -0.24766 | 5.036814 | -2.82857 | 0.013842 | 0.131445 | -3.06201 |

|           |          |          |          |          |          |          |
|-----------|----------|----------|----------|----------|----------|----------|
| Tmem14a   | -0.24771 | 3.863286 | -2.62023 | 0.020704 | 0.159795 | -3.43471 |
| 1700016K1 | -0.24773 | 3.974932 | -2.22879 | 0.043458 | 0.227717 | -4.10958 |
| Slc25a53  | -0.24774 | 3.790844 | -3.13826 | 0.00757  | 0.098031 | -2.49768 |
| Glyctk    | -0.24778 | 4.101371 | -2.31072 | 0.037291 | 0.210788 | -3.97178 |
| Kcnq5     | -0.2479  | 4.014557 | -2.90259 | 0.011988 | 0.121077 | -2.92805 |
| Pcdhb13   | -0.24792 | 3.662418 | -2.49495 | 0.026316 | 0.179203 | -3.6549  |
| Rpn2      | -0.24804 | 7.505374 | -2.83492 | 0.013673 | 0.130529 | -3.05055 |
| Ranbp1    | -0.24835 | 4.391127 | -3.14364 | 0.007491 | 0.097601 | -2.48779 |
| Vstm2l    | -0.24846 | 4.684199 | -2.84043 | 0.013528 | 0.129716 | -3.04061 |
| Poll      | -0.24859 | 4.551324 | -2.46758 | 0.027724 | 0.184187 | -3.70253 |
| Amh       | -0.24871 | 3.998611 | -2.72141 | 0.017036 | 0.145017 | -3.25461 |
| Polr2m    | -0.24871 | 9.856764 | -3.54232 | 0.003439 | 0.067271 | -1.75313 |
| Cdh1      | -0.24877 | 4.028612 | -3.62719 | 0.002916 | 0.062595 | -1.59664 |
| Astn2     | -0.24881 | 4.549588 | -2.18819 | 0.046859 | 0.23567  | -4.17707 |
| Olfr1459  | -0.24885 | 3.517012 | -2.83692 | 0.01362  | 0.130128 | -3.04694 |
| Grb7      | -0.24895 | 3.994013 | -2.58438 | 0.02218  | 0.164927 | -3.49806 |
| Cldn22    | -0.24897 | 3.743193 | -2.97691 | 0.010372 | 0.113896 | -2.79288 |
| Gm7244    | -0.24925 | 3.424202 | -3.58412 | 0.00317  | 0.065355 | -1.67603 |
| Cxcl17    | -0.24929 | 4.050483 | -3.04808 | 0.009028 | 0.107057 | -2.66292 |
| Tial1     | -0.2495  | 6.925541 | -2.85084 | 0.013257 | 0.128135 | -3.02179 |
| Elovl2    | -0.24969 | 3.859853 | -3.16276 | 0.007216 | 0.09563  | -2.45268 |
| Gnl3l     | -0.24974 | 6.179331 | -2.52403 | 0.024896 | 0.174931 | -3.60409 |
| Kcnmb4    | -0.24976 | 3.856238 | -2.84187 | 0.01349  | 0.129532 | -3.03801 |
| Lhx4      | -0.24998 | 3.879159 | -2.89953 | 0.01206  | 0.121279 | -2.93361 |
| Pou6f1    | -0.2501  | 4.813102 | -2.46535 | 0.027842 | 0.184673 | -3.7064  |
| Grem2     | -0.2503  | 3.793389 | -2.98787 | 0.010153 | 0.112746 | -2.7729  |
| A630089Nf | -0.25031 | 3.514333 | -2.65769 | 0.019264 | 0.154199 | -3.36826 |
| Gm26519   | -0.25034 | 4.434077 | -2.51704 | 0.02523  | 0.175619 | -3.61632 |
| A230072E1 | -0.25063 | 3.754729 | -3.10569 | 0.008068 | 0.101807 | -2.55742 |
| Sox21     | -0.2507  | 3.991513 | -2.5462  | 0.023863 | 0.171255 | -3.56524 |
| 4930545L2 | -0.25079 | 3.590912 | -2.43272 | 0.029623 | 0.190881 | -3.76293 |
| Exoc3l2   | -0.25082 | 4.523351 | -3.54649 | 0.003411 | 0.067035 | -1.74543 |
| Ii12b     | -0.25082 | 3.711583 | -4.09461 | 0.001184 | 0.041181 | -0.74044 |
| Gm15421   | -0.25083 | 3.997304 | -2.35967 | 0.034011 | 0.202179 | -3.88848 |
| Chrn4     | -0.25089 | 3.761193 | -3.15778 | 0.007287 | 0.096206 | -2.46183 |
| Emilin3   | -0.25107 | 3.739292 | -2.76567 | 0.015638 | 0.138835 | -3.17529 |
| Gm684     | -0.2511  | 4.428162 | -2.80162 | 0.014586 | 0.134395 | -3.11062 |
| Slc35g3   | -0.25126 | 3.742045 | -2.60747 | 0.021218 | 0.161804 | -3.4573  |
| Tekt5     | -0.25127 | 3.717546 | -2.77256 | 0.015431 | 0.138285 | -3.1629  |
| Smkr-ps   | -0.25131 | 3.778804 | -3.66256 | 0.002722 | 0.061295 | -1.53146 |
| Olfr1039  | -0.25132 | 3.377353 | -2.82863 | 0.013841 | 0.131445 | -3.06191 |
| Folr1     | -0.25141 | 3.909941 | -3.64173 | 0.002834 | 0.062248 | -1.56984 |
| Msx3      | -0.25156 | 3.786409 | -3.83765 | 0.001939 | 0.051921 | -1.20958 |
| Npffr2    | -0.25173 | 3.452342 | -2.77192 | 0.01545  | 0.138356 | -3.16406 |
| G6bos     | -0.25188 | 3.857132 | -2.66967 | 0.018825 | 0.152672 | -3.34694 |
| Olfr1348  | -0.25197 | 3.805656 | -2.5568  | 0.023383 | 0.169774 | -3.54662 |
| Lcn10     | -0.25201 | 3.786024 | -2.31456 | 0.037023 | 0.210327 | -3.96527 |
| Cxcr1     | -0.25201 | 3.947238 | -2.65051 | 0.019533 | 0.155006 | -3.38102 |

|           |          |          |          |          |          |          |
|-----------|----------|----------|----------|----------|----------|----------|
| Lhb       | -0.25207 | 4.171653 | -3.10821 | 0.008028 | 0.10145  | -2.5528  |
| A930001C  | -0.2522  | 4.01599  | -2.29879 | 0.038134 | 0.212799 | -3.99198 |
| Agrp      | -0.25223 | 3.616072 | -2.78854 | 0.01496  | 0.136388 | -3.13417 |
| Mir7b     | -0.2523  | 4.066723 | -3.5099  | 0.003664 | 0.069154 | -1.81292 |
| Tagln3    | -0.25242 | 4.016691 | -2.28851 | 0.038875 | 0.214843 | -4.00933 |
| Fosb      | -0.25279 | 3.975655 | -3.43183 | 0.004266 | 0.07495  | -1.95698 |
| Kcnk6     | -0.25292 | 5.43376  | -2.39317 | 0.031927 | 0.197039 | -3.83109 |
| Slc10a4   | -0.25292 | 4.122155 | -2.22877 | 0.04346  | 0.227717 | -4.10962 |
| Gm30502   | -0.2531  | 3.924801 | -2.21987 | 0.044186 | 0.229025 | -4.12447 |
| Wars2     | -0.25311 | 4.881259 | -3.66342 | 0.002718 | 0.061249 | -1.52988 |
| Hoxd10    | -0.25335 | 3.926873 | -3.10003 | 0.008157 | 0.102306 | -2.5678  |
| Gm11211   | -0.25338 | 3.865497 | -2.97912 | 0.010328 | 0.113608 | -2.78886 |
| Ccdc136   | -0.25367 | 4.143185 | -3.09066 | 0.008308 | 0.103197 | -2.58497 |
| Tunar     | -0.25401 | 3.975779 | -2.73804 | 0.016497 | 0.142794 | -3.22484 |
| Ybx3      | -0.25407 | 10.80558 | -2.72948 | 0.016772 | 0.144108 | -3.24018 |
| Abo       | -0.25441 | 3.801666 | -3.19837 | 0.006731 | 0.092813 | -2.38723 |
| Stkld1    | -0.25564 | 3.496041 | -3.87109 | 0.001818 | 0.050594 | -1.14828 |
| Dhx29     | -0.25576 | 6.412971 | -2.59468 | 0.021746 | 0.163395 | -3.47989 |
| Gm17764   | -0.256   | 3.891776 | -3.40333 | 0.00451  | 0.07686  | -2.00957 |
| Olf203    | -0.25601 | 3.33277  | -3.1324  | 0.007658 | 0.09838  | -2.50843 |
| F12       | -0.25604 | 3.847161 | -2.18869 | 0.046816 | 0.23567  | -4.17625 |
| 1700001G1 | -0.25605 | 4.296617 | -2.55321 | 0.023544 | 0.170415 | -3.55292 |
| Catsper4  | -0.25612 | 3.737339 | -3.62039 | 0.002954 | 0.062839 | -1.60916 |
| Palm3     | -0.25614 | 4.231305 | -3.0244  | 0.009455 | 0.109319 | -2.70621 |
| Gm266     | -0.25636 | 3.918449 | -2.37142 | 0.033266 | 0.200371 | -3.86839 |
| Olf1153   | -0.25652 | 3.189451 | -3.83937 | 0.001933 | 0.051921 | -1.20643 |
| Mdp1      | -0.25667 | 6.921143 | -2.46887 | 0.027656 | 0.183997 | -3.70028 |
| Defb7     | -0.25693 | 3.142042 | -3.67113 | 0.002677 | 0.06089  | -1.51567 |
| A230050P2 | -0.25707 | 4.556522 | -2.43361 | 0.029572 | 0.190704 | -3.76138 |
| Mir143hg  | -0.25709 | 7.010125 | -3.17885 | 0.006993 | 0.09438  | -2.42311 |
| Tnfaip8l3 | -0.25723 | 3.750375 | -3.33387 | 0.005165 | 0.081791 | -2.13768 |
| Gm11548   | -0.25751 | 3.298245 | -3.38987 | 0.00463  | 0.077689 | -2.03439 |
| Hnrnp1    | -0.25757 | 5.066528 | -2.66442 | 0.019016 | 0.153536 | -3.35628 |
| D030025P2 | -0.25761 | 3.531597 | -3.24651 | 0.006127 | 0.088386 | -2.29865 |
| Acmsd     | -0.25776 | 3.505724 | -3.72474 | 0.002413 | 0.057456 | -1.417   |
| Ly6k      | -0.2579  | 4.300573 | -2.36018 | 0.033978 | 0.202082 | -3.88761 |
| Rhd       | -0.25829 | 4.628506 | -2.6853  | 0.018266 | 0.150181 | -3.31911 |
| A330069E1 | -0.25833 | 3.837957 | -3.16831 | 0.007139 | 0.09532  | -2.44248 |
| Ifng      | -0.25852 | 3.768772 | -2.92692 | 0.011433 | 0.119327 | -2.88386 |
| Gip       | -0.25857 | 4.660592 | -2.5383  | 0.024226 | 0.17274  | -3.57909 |
| Tbl2      | -0.25863 | 5.962484 | -2.77729 | 0.01529  | 0.137678 | -3.15441 |
| Slc17a8   | -0.25881 | 3.877513 | -2.15495 | 0.049828 | 0.243034 | -4.23192 |
| 2310039HC | -0.25885 | 6.007945 | -2.2151  | 0.044578 | 0.229533 | -4.1324  |
| AB124611  | -0.25897 | 4.309153 | -2.23578 | 0.042897 | 0.226685 | -4.09791 |
| Gng8      | -0.25902 | 3.579636 | -3.22192 | 0.006429 | 0.090568 | -2.3439  |
| Pafah1b1  | -0.25909 | 9.157562 | -3.10269 | 0.008115 | 0.102043 | -2.56292 |
| Gm13003   | -0.25926 | 3.893073 | -4.66654 | 0.000404 | 0.027213 | 0.281679 |
| Nfe2l3    | -0.25954 | 4.264923 | -2.76923 | 0.01553  | 0.13868  | -3.16889 |



|            |          |          |          |          |          |          |
|------------|----------|----------|----------|----------|----------|----------|
| Olf131     | -0.2596  | 3.401938 | -2.85802 | 0.013073 | 0.126961 | -3.0088  |
| Tsk1       | -0.25961 | 3.985916 | -3.12558 | 0.00776  | 0.098983 | -2.52094 |
| Phlda3     | -0.25968 | 5.649129 | -2.19172 | 0.046555 | 0.23509  | -4.17124 |
| Gm12236    | -0.25969 | 4.496292 | -2.37892 | 0.032798 | 0.198877 | -3.85553 |
| Dnph1      | -0.26004 | 4.240258 | -2.25998 | 0.041005 | 0.221075 | -4.05737 |
| Olf441     | -0.26006 | 3.256931 | -2.38657 | 0.032328 | 0.197792 | -3.84242 |
| Sfrp2      | -0.26028 | 4.449614 | -2.16157 | 0.049223 | 0.241323 | -4.22102 |
| Olf412     | -0.26042 | 3.259274 | -3.94898 | 0.001565 | 0.046979 | -1.00575 |
| Fbx14      | -0.26053 | 5.341088 | -2.79838 | 0.014677 | 0.134791 | -3.11645 |
| Zfp777     | -0.26072 | 4.819999 | -2.16823 | 0.048621 | 0.239939 | -4.21005 |
| Rem2       | -0.26087 | 3.691099 | -2.98379 | 0.010234 | 0.113027 | -2.78033 |
| Tmem145    | -0.261   | 4.033886 | -3.05772 | 0.00886  | 0.106411 | -2.64529 |
| Prokr1     | -0.26101 | 4.033557 | -2.36706 | 0.03354  | 0.201111 | -3.87584 |
| 493059210G | -0.26103 | 3.556983 | -2.97552 | 0.010401 | 0.114104 | -2.79541 |
| 2300002M   | -0.26109 | 3.901437 | -2.33048 | 0.035932 | 0.206968 | -3.93824 |
| Zfp281     | -0.26115 | 5.370076 | -2.60116 | 0.021477 | 0.1626   | -3.46844 |
| Slc39a13   | -0.26116 | 7.488234 | -2.66091 | 0.019145 | 0.153812 | -3.36253 |
| Gm7325     | -0.26126 | 3.8653   | -4.75007 | 0.000346 | 0.025759 | 0.427744 |
| Gm21559    | -0.26127 | 3.494119 | -2.98872 | 0.010136 | 0.112746 | -2.77134 |
| Mir16-1    | -0.26128 | 4.49094  | -3.17024 | 0.007112 | 0.09532  | -2.43893 |
| Ltb4r1     | -0.26136 | 3.900569 | -3.70289 | 0.002517 | 0.058591 | -1.45721 |
| A930038B1  | -0.26143 | 3.764142 | -4.6145  | 0.000445 | 0.027766 | 0.190206 |
| Sox10      | -0.26182 | 3.969187 | -3.44453 | 0.004162 | 0.073899 | -1.93354 |
| Myh14      | -0.26187 | 6.886481 | -2.986   | 0.01019  | 0.112865 | -2.77631 |
| Dtx4       | -0.26193 | 5.215227 | -2.52707 | 0.024751 | 0.174312 | -3.59877 |
| D1Ert622c  | -0.26193 | 4.336809 | -2.45945 | 0.028156 | 0.185962 | -3.71664 |
| Cass4      | -0.26197 | 3.736282 | -2.22805 | 0.043518 | 0.227761 | -4.11082 |
| Cfap46     | -0.26199 | 3.821803 | -3.17556 | 0.007038 | 0.094671 | -2.42916 |
| Esr2       | -0.26202 | 4.181654 | -2.6152  | 0.020905 | 0.160601 | -3.44362 |
| Ttbk1      | -0.26209 | 4.289692 | -2.50958 | 0.025592 | 0.176732 | -3.62935 |
| Eif3e      | -0.26219 | 6.282477 | -2.15438 | 0.049881 | 0.243108 | -4.23286 |
| Fam117b    | -0.2624  | 7.933902 | -2.47147 | 0.02752  | 0.18346  | -3.69577 |
| H2-T3      | -0.26257 | 3.616843 | -3.25157 | 0.006067 | 0.088146 | -2.28933 |
| Igfbp1     | -0.26283 | 3.641451 | -3.39731 | 0.004563 | 0.077338 | -2.02067 |
| Esx1       | -0.26314 | 3.795514 | -3.06024 | 0.008816 | 0.106281 | -2.64068 |
| Zrsr2      | -0.26329 | 5.255887 | -2.42561 | 0.030025 | 0.192177 | -3.77522 |
| Celf5      | -0.26345 | 4.297635 | -2.7547  | 0.015973 | 0.140608 | -3.19498 |
| Pax3       | -0.2635  | 3.961514 | -2.36746 | 0.033515 | 0.201009 | -3.87516 |
| Ptpn1      | -0.26355 | 5.058818 | -3.02088 | 0.00952  | 0.109775 | -2.71266 |
| Olf645     | -0.26365 | 3.321136 | -3.64192 | 0.002833 | 0.062248 | -1.56948 |
| Cebpe      | -0.26366 | 3.965337 | -2.48542 | 0.026798 | 0.181067 | -3.67149 |
| Olf1336    | -0.26375 | 3.660689 | -3.32729 | 0.005232 | 0.082544 | -2.14981 |
| Mir1932    | -0.26389 | 4.58225  | -2.34283 | 0.035107 | 0.205016 | -3.9172  |
| Slc14a1    | -0.26405 | 4.136692 | -2.86904 | 0.012796 | 0.125438 | -2.98885 |
| Wdr54      | -0.26423 | 4.249232 | -2.87631 | 0.012616 | 0.124572 | -2.97569 |
| Gm6899     | -0.26425 | 4.644079 | -3.20546 | 0.006639 | 0.09215  | -2.37419 |
| Gm6408     | -0.26501 | 3.78123  | -2.57839 | 0.022436 | 0.165799 | -3.50861 |
| Dynl12     | -0.26525 | 5.560571 | -2.32021 | 0.036632 | 0.209012 | -3.95567 |

|           |          |          |          |          |          |          |
|-----------|----------|----------|----------|----------|----------|----------|
| Dmrtb1    | -0.2655  | 3.904767 | -2.17303 | 0.048192 | 0.238969 | -4.20214 |
| Rbck1     | -0.26558 | 6.042341 | -2.16707 | 0.048726 | 0.240009 | -4.21197 |
| Krtap19-4 | -0.26562 | 6.045739 | -2.29625 | 0.038316 | 0.213095 | -3.99627 |
| Snhg10    | -0.26586 | 4.13107  | -3.12658 | 0.007745 | 0.098891 | -2.5191  |
| Ltb4r2    | -0.2664  | 3.992778 | -2.63137 | 0.020266 | 0.158157 | -3.41499 |
| Ahcyl2    | -0.26654 | 5.038279 | -2.41056 | 0.030893 | 0.194818 | -3.80116 |
| Klrg2     | -0.26669 | 4.440872 | -3.2757  | 0.005787 | 0.086409 | -2.2449  |
| Tmem221   | -0.26699 | 4.045541 | -2.42375 | 0.03013  | 0.19235  | -3.77841 |
| Gm17518   | -0.26726 | 3.887448 | -2.77725 | 0.015291 | 0.137678 | -3.15448 |
| Taf11     | -0.26742 | 5.928301 | -3.27033 | 0.005848 | 0.08676  | -2.25478 |
| 1700039E1 | -0.26753 | 3.710961 | -2.61625 | 0.020863 | 0.160601 | -3.44177 |
| Tulp3     | -0.26755 | 5.476739 | -2.68857 | 0.018151 | 0.149762 | -3.31328 |
| Etohi1    | -0.26761 | 5.946113 | -2.65209 | 0.019473 | 0.154963 | -3.37821 |
| Nol12     | -0.26788 | 4.842134 | -3.01918 | 0.009552 | 0.110037 | -2.71575 |
| Rab40b    | -0.26793 | 4.399239 | -2.50284 | 0.025923 | 0.178004 | -3.64114 |
| Plag1     | -0.26813 | 4.863658 | -2.55069 | 0.023658 | 0.170625 | -3.55735 |
| Apoc4     | -0.26822 | 3.763923 | -3.30655 | 0.005449 | 0.083865 | -2.18804 |
| Kcna6     | -0.26865 | 3.89367  | -3.81846 | 0.002012 | 0.052939 | -1.24478 |
| Mipepos   | -0.26873 | 3.321526 | -3.41493 | 0.004409 | 0.076226 | -1.98817 |
| Foxa3     | -0.26878 | 4.217334 | -3.99937 | 0.00142  | 0.044615 | -0.91378 |
| Syt4      | -0.2691  | 3.47702  | -3.70604 | 0.002502 | 0.058288 | -1.45141 |
| Gcnt1     | -0.26932 | 3.882592 | -2.35162 | 0.034531 | 0.203418 | -3.90223 |
| Ube2j2    | -0.26933 | 6.710548 | -2.31228 | 0.037181 | 0.21051  | -3.96913 |
| 4930558J1 | -0.26942 | 3.626846 | -3.63836 | 0.002853 | 0.062326 | -1.57604 |
| Lrrtm1    | -0.26957 | 3.66746  | -4.04531 | 0.001301 | 0.042778 | -0.83008 |
| Fam179a   | -0.27057 | 4.578908 | -2.42711 | 0.029939 | 0.191974 | -3.77261 |
| Arc       | -0.27058 | 4.972944 | -2.47202 | 0.027491 | 0.183372 | -3.69481 |
| Olf70     | -0.27064 | 3.905207 | -2.19867 | 0.045959 | 0.23338  | -4.15971 |
| Zfx       | -0.27076 | 5.301307 | -2.19519 | 0.046256 | 0.234242 | -4.16548 |
| Magea8    | -0.27108 | 3.339478 | -4.09235 | 0.001189 | 0.041181 | -0.74455 |
| Nkx2-2os  | -0.27122 | 3.688365 | -4.3946  | 0.00067  | 0.033    | -0.19988 |
| Sall2     | -0.27124 | 4.208291 | -2.69223 | 0.018023 | 0.149042 | -3.30675 |
| Cybrd1    | -0.27132 | 3.894858 | -2.46882 | 0.027659 | 0.183997 | -3.70037 |
| Tmem170k  | -0.2714  | 6.196984 | -2.42364 | 0.030137 | 0.19235  | -3.77861 |
| Vmn1r119  | -0.27153 | 4.209937 | -2.47621 | 0.027272 | 0.182517 | -3.68752 |
| Habp2     | -0.27167 | 4.073474 | -2.70575 | 0.017559 | 0.147342 | -3.28261 |
| Csmd1     | -0.27197 | 3.746667 | -3.11213 | 0.007967 | 0.100893 | -2.54561 |
| 5730460CC | -0.27197 | 3.850018 | -3.75097 | 0.002293 | 0.05644  | -1.36877 |
| Abcb4     | -0.27204 | 6.707079 | -2.7235  | 0.016967 | 0.144917 | -3.25088 |
| Cd209d    | -0.27221 | 3.374151 | -3.37291 | 0.004786 | 0.078798 | -2.06569 |
| 1700128AC | -0.27228 | 4.13404  | -2.6484  | 0.019612 | 0.155392 | -3.38477 |
| Coa7      | -0.27246 | 4.756183 | -2.31351 | 0.037096 | 0.21051  | -3.96705 |
| Rnaseh2b  | -0.27272 | 5.307326 | -2.99727 | 0.009969 | 0.112245 | -2.75575 |
| Zfp36l1   | -0.27275 | 9.384786 | -2.84651 | 0.013369 | 0.128731 | -3.02962 |
| Slamf7    | -0.27288 | 3.745722 | -3.88893 | 0.001756 | 0.050018 | -1.1156  |
| Rab34     | -0.27298 | 4.319726 | -2.35913 | 0.034046 | 0.202259 | -3.88941 |
| Mcoln3    | -0.27331 | 3.889467 | -2.43444 | 0.029526 | 0.190502 | -3.75995 |
| Neurog1   | -0.27343 | 3.793133 | -3.4271  | 0.004306 | 0.075273 | -1.96571 |

|           |          |          |          |          |          |          |
|-----------|----------|----------|----------|----------|----------|----------|
| Raph1     | -0.27352 | 9.530884 | -3.16476 | 0.007188 | 0.095461 | -2.44902 |
| Cdc20     | -0.27356 | 4.405702 | -3.49873 | 0.003744 | 0.069861 | -1.83353 |
| Gm14010   | -0.27357 | 4.71543  | -2.74461 | 0.016288 | 0.141919 | -3.21307 |
| Dusp2     | -0.27391 | 4.307543 | -2.37501 | 0.033041 | 0.199443 | -3.86223 |
| Rundc3b   | -0.27409 | 3.661053 | -2.68313 | 0.018343 | 0.150444 | -3.32298 |
| Reps2     | -0.27416 | 4.147425 | -3.23207 | 0.006302 | 0.089626 | -2.32523 |
| Fam196a   | -0.27417 | 3.952026 | -2.51524 | 0.025317 | 0.17589  | -3.61947 |
| Sltm      | -0.27464 | 7.204149 | -2.57548 | 0.022561 | 0.166143 | -3.51374 |
| Racgap1   | -0.27469 | 3.74734  | -3.13895 | 0.00756  | 0.09799  | -2.4964  |
| Dhcr24    | -0.27483 | 4.237745 | -4.18801 | 0.000991 | 0.038783 | -0.57122 |
| Skint7    | -0.27504 | 3.913506 | -2.65068 | 0.019526 | 0.155006 | -3.38072 |
| Tectb     | -0.27525 | 3.815579 | -4.46757 | 0.000585 | 0.031294 | -0.06981 |
| Stx4a     | -0.27551 | 6.856059 | -2.33761 | 0.035453 | 0.205831 | -3.9261  |
| 6030452D1 | -0.27567 | 3.672796 | -3.37809 | 0.004738 | 0.07842  | -2.05613 |
| Commd10   | -0.2757  | 5.597666 | -3.88775 | 0.00176  | 0.050025 | -1.11776 |
| Madcam1   | -0.27588 | 4.066652 | -2.78984 | 0.014922 | 0.136342 | -3.13182 |
| Ephb1     | -0.27605 | 4.213213 | -2.25769 | 0.04118  | 0.221398 | -4.06121 |
| Gm14015   | -0.27616 | 3.574809 | -3.11086 | 0.007987 | 0.101042 | -2.54795 |
| Zfp367    | -0.27628 | 6.328657 | -2.91193 | 0.011772 | 0.120438 | -2.9111  |
| Arhgap33c | -0.2763  | 4.290563 | -2.62878 | 0.020367 | 0.15847  | -3.41957 |
| Elavl2    | -0.27635 | 3.722582 | -3.28933 | 0.005635 | 0.085317 | -2.21979 |
| Ccnf      | -0.27644 | 3.896776 | -2.93609 | 0.011231 | 0.118259 | -2.8672  |
| Unk       | -0.27659 | 5.028208 | -2.94152 | 0.011113 | 0.11753  | -2.85732 |
| 2010010AC | -0.27664 | 3.719674 | -2.44649 | 0.028858 | 0.188298 | -3.73911 |
| Frs3      | -0.27665 | 4.636578 | -3.24512 | 0.006144 | 0.088386 | -2.30121 |
| Spp1      | -0.27668 | 3.909921 | -2.547   | 0.023826 | 0.171188 | -3.56383 |
| 1700048O2 | -0.2768  | 3.827503 | -2.95974 | 0.010725 | 0.115604 | -2.82415 |
| 2610027KC | -0.27702 | 4.252602 | -3.3837  | 0.004686 | 0.077965 | -2.04578 |
| Kif7      | -0.27707 | 4.481259 | -2.79023 | 0.014911 | 0.136337 | -3.13112 |
| Dcst2     | -0.27707 | 4.015272 | -2.27728 | 0.039701 | 0.21727  | -4.02828 |
| Dmrtd2    | -0.27714 | 4.160094 | -2.40317 | 0.031329 | 0.195921 | -3.81389 |
| Sepw1     | -0.27722 | 8.92747  | -3.00644 | 0.009792 | 0.11129  | -2.73902 |
| Ngfrap1   | -0.27728 | 5.123406 | -3.14423 | 0.007483 | 0.097601 | -2.48671 |
| Gas6      | -0.2774  | 8.933567 | -2.21539 | 0.044555 | 0.229533 | -4.13193 |
| Gm7241    | -0.27744 | 6.264601 | -2.32164 | 0.036534 | 0.20874  | -3.95325 |
| Zfp580    | -0.27747 | 5.106059 | -2.49603 | 0.026262 | 0.179203 | -3.65302 |
| Krr1      | -0.27747 | 6.925229 | -2.24646 | 0.042052 | 0.223902 | -4.08004 |
| Olfr1344  | -0.27775 | 3.61259  | -2.65516 | 0.019358 | 0.154545 | -3.37276 |
| Hamp2     | -0.27791 | 3.591353 | -3.20139 | 0.006692 | 0.092575 | -2.38167 |
| Rit1      | -0.2781  | 8.01948  | -3.38162 | 0.004705 | 0.078141 | -2.04962 |
| Rrm1      | -0.2789  | 5.11299  | -2.23825 | 0.0427   | 0.22605  | -4.09379 |
| A830009LC | -0.27893 | 3.535421 | -4.31757 | 0.000775 | 0.034403 | -0.33782 |
| Mgme1     | -0.27896 | 4.624354 | -2.76637 | 0.015617 | 0.138772 | -3.17403 |
| C230012O1 | -0.27933 | 4.320786 | -3.54245 | 0.003438 | 0.067271 | -1.75289 |
| E530001F2 | -0.27939 | 3.852902 | -2.7291  | 0.016784 | 0.144131 | -3.24086 |
| Dnajc6    | -0.27954 | 3.72001  | -3.75725 | 0.002265 | 0.056149 | -1.35722 |
| Rfc1      | -0.27956 | 6.3166   | -2.46773 | 0.027716 | 0.184184 | -3.70227 |
| Klc3      | -0.27959 | 4.072935 | -3.59786 | 0.003087 | 0.06427  | -1.65069 |

|           |          |          |          |          |          |          |
|-----------|----------|----------|----------|----------|----------|----------|
| Med30     | -0.27966 | 4.705873 | -3.18973 | 0.006846 | 0.093296 | -2.40311 |
| Mip       | -0.27967 | 3.726212 | -2.25659 | 0.041265 | 0.221534 | -4.06307 |
| Car5a     | -0.27999 | 3.808083 | -3.63645 | 0.002864 | 0.062351 | -1.57956 |
| Tubb1     | -0.28046 | 3.663154 | -3.13486 | 0.007621 | 0.09819  | -2.50392 |
| Neurl1a   | -0.28072 | 4.066344 | -2.66553 | 0.018975 | 0.153364 | -3.35431 |
| Exosc6    | -0.28088 | 5.260278 | -3.06629 | 0.008713 | 0.105659 | -2.62961 |
| Otud6a    | -0.28101 | 3.929647 | -3.44953 | 0.004121 | 0.073444 | -1.92431 |
| Gpr31b    | -0.28115 | 4.546436 | -2.75227 | 0.016049 | 0.140682 | -3.19934 |
| Ccl20     | -0.28125 | 4.066406 | -2.62379 | 0.020563 | 0.159184 | -3.42841 |
| Nhsl1     | -0.28148 | 5.675991 | -2.65051 | 0.019533 | 0.155006 | -3.38102 |
| Ugt1a9    | -0.28154 | 3.36989  | -2.59569 | 0.021703 | 0.1633   | -3.4781  |
| Raly1     | -0.28155 | 3.656425 | -3.61277 | 0.002999 | 0.063192 | -1.62321 |
| Olf1402   | -0.28171 | 3.833996 | -2.48042 | 0.027055 | 0.182026 | -3.68021 |
| Gm7964    | -0.28187 | 7.007175 | -4.03078 | 0.001337 | 0.043517 | -0.85653 |
| Zbtb43    | -0.28198 | 5.208944 | -4.09295 | 0.001187 | 0.041181 | -0.74347 |
| Slc5a4a   | -0.28225 | 3.684721 | -3.6034  | 0.003054 | 0.063948 | -1.64047 |
| Tmem164   | -0.28261 | 4.884901 | -2.6036  | 0.021376 | 0.162123 | -3.46413 |
| Gm1995    | -0.28263 | 3.917199 | -2.64264 | 0.019831 | 0.156366 | -3.39499 |
| Lrrc2     | -0.28284 | 10.98781 | -4.6839  | 0.000391 | 0.027042 | 0.312104 |
| Hnrnpc    | -0.28303 | 8.035078 | -3.04462 | 0.009089 | 0.107599 | -2.66925 |
| Cryz11    | -0.28318 | 5.089532 | -2.57902 | 0.022408 | 0.165796 | -3.5075  |
| Gm10318   | -0.28343 | 3.338019 | -4.45562 | 0.000598 | 0.031551 | -0.09107 |
| Myd8f     | -0.28354 | 5.302239 | -2.59516 | 0.021725 | 0.16334  | -3.47904 |
| Gm11513   | -0.2839  | 3.95123  | -2.64244 | 0.019838 | 0.156366 | -3.39534 |
| Duoxa2    | -0.28415 | 3.691013 | -3.07747 | 0.008525 | 0.104487 | -2.60914 |
| Chrm3     | -0.28426 | 3.933065 | -3.09847 | 0.008182 | 0.102474 | -2.57066 |
| Ttc14     | -0.28438 | 5.478417 | -2.50703 | 0.025717 | 0.177192 | -3.63381 |
| Rbm42     | -0.28455 | 6.275696 | -2.37879 | 0.032806 | 0.198877 | -3.85575 |
| Gm20467   | -0.28467 | 3.971922 | -3.09082 | 0.008305 | 0.103197 | -2.58468 |
| Fam124a   | -0.28476 | 6.000522 | -2.43561 | 0.029461 | 0.190182 | -3.75794 |
| Trim9     | -0.28502 | 3.762273 | -3.2836  | 0.005699 | 0.08565  | -2.23033 |
| Fam110a   | -0.28504 | 4.522356 | -2.89692 | 0.012121 | 0.121551 | -2.93833 |
| Gm5635    | -0.28539 | 4.189987 | -2.22162 | 0.044042 | 0.228776 | -4.12155 |
| 1700013G2 | -0.28546 | 3.745536 | -3.1538  | 0.007344 | 0.0967   | -2.46913 |
| Cd300lb   | -0.28571 | 3.812795 | -3.05015 | 0.008992 | 0.106956 | -2.65915 |
| Ifngr2    | -0.28573 | 10.00525 | -2.43323 | 0.029594 | 0.190773 | -3.76205 |
| Kdm4b     | -0.28605 | 5.138387 | -2.48421 | 0.02686  | 0.181257 | -3.67361 |
| Lama5     | -0.28614 | 7.80501  | -2.33863 | 0.035386 | 0.20563  | -3.92437 |
| Cyp39a1   | -0.28628 | 5.963145 | -2.27822 | 0.039632 | 0.217156 | -4.0267  |
| D430036J1 | -0.28643 | 3.657159 | -4.3059  | 0.000792 | 0.034854 | -0.35878 |
| Tex19.2   | -0.28654 | 3.742149 | -3.76016 | 0.002253 | 0.05598  | -1.35187 |
| Ucn2      | -0.28656 | 3.6304   | -3.83327 | 0.001956 | 0.052101 | -1.21762 |
| Hsf4      | -0.2866  | 4.988859 | -2.27235 | 0.040068 | 0.218537 | -4.03658 |
| Tmem231   | -0.28665 | 4.562566 | -2.37777 | 0.032869 | 0.198988 | -3.8575  |
| Wnt5b     | -0.28672 | 4.215364 | -3.60458 | 0.003047 | 0.063917 | -1.6383  |
| Mybph     | -0.28688 | 4.078078 | -3.85    | 0.001893 | 0.051557 | -1.18694 |
| 4833439L1 | -0.28694 | 8.724043 | -3.53643 | 0.003479 | 0.067579 | -1.76398 |
| Slc39a11  | -0.287   | 4.718965 | -4.27122 | 0.000846 | 0.036197 | -0.42112 |

|            |          |          |          |          |          |          |
|------------|----------|----------|----------|----------|----------|----------|
| Nkx6-2     | -0.28712 | 4.70833  | -2.43148 | 0.029692 | 0.191232 | -3.76508 |
| Chmp3      | -0.28717 | 4.838835 | -2.22626 | 0.043663 | 0.227968 | -4.1138  |
| Spem1      | -0.28727 | 3.520916 | -3.31973 | 0.00531  | 0.083    | -2.16374 |
| Gm12927    | -0.28755 | 3.926375 | -2.73357 | 0.01664  | 0.143385 | -3.23285 |
| B3gnt8     | -0.28761 | 3.611972 | -3.59206 | 0.003122 | 0.064729 | -1.66139 |
| Gm7977     | -0.28768 | 4.118532 | -2.22471 | 0.04379  | 0.228192 | -4.1164  |
| Il1rn      | -0.28825 | 3.726724 | -4.23985 | 0.000898 | 0.037322 | -0.47764 |
| Adam8      | -0.28832 | 4.136193 | -2.28827 | 0.038893 | 0.214843 | -4.00974 |
| Prr30      | -0.28846 | 3.609514 | -3.5548  | 0.003357 | 0.066677 | -1.7301  |
| Krtdap     | -0.28849 | 3.702272 | -4.13429 | 0.001097 | 0.03993  | -0.66845 |
| Hmx2       | -0.28854 | 4.500749 | -4.15145 | 0.001062 | 0.039677 | -0.63736 |
| Naif1      | -0.28887 | 4.542577 | -2.54526 | 0.023905 | 0.171363 | -3.56688 |
| Coch       | -0.28927 | 3.74428  | -4.38987 | 0.000676 | 0.033    | -0.20834 |
| 49305240C  | -0.28939 | 3.647217 | -3.61503 | 0.002985 | 0.063125 | -1.61904 |
| Lnp1       | -0.28958 | 3.55866  | -3.2561  | 0.006013 | 0.087839 | -2.28099 |
| Rscan18    | -0.28962 | 4.118535 | -2.3168  | 0.036867 | 0.209845 | -3.96146 |
| B9d1       | -0.28966 | 5.067573 | -2.63643 | 0.020069 | 0.157169 | -3.40601 |
| Cyp24a1    | -0.2899  | 3.667711 | -3.97633 | 0.001485 | 0.045603 | -0.95582 |
| Rhpn1      | -0.2902  | 4.487386 | -3.71312 | 0.002468 | 0.057893 | -1.43838 |
| Hp1bp3     | -0.29029 | 6.93949  | -2.36247 | 0.033832 | 0.201694 | -3.8837  |
| 5830415F0  | -0.29031 | 4.496936 | -3.90429 | 0.001705 | 0.049196 | -1.08748 |
| Setbp1     | -0.29043 | 6.201138 | -2.59962 | 0.02154  | 0.162659 | -3.47116 |
| Apitd1     | -0.29055 | 4.521718 | -2.98526 | 0.010205 | 0.112905 | -2.77765 |
| Hsd3b3     | -0.29057 | 3.390279 | -3.77849 | 0.002174 | 0.054728 | -1.31818 |
| Ankrd24    | -0.29062 | 4.625197 | -2.74335 | 0.016328 | 0.142028 | -3.21533 |
| Vwa1       | -0.29068 | 4.954108 | -2.29609 | 0.038328 | 0.213112 | -3.99654 |
| Nacad      | -0.29072 | 4.293279 | -2.99856 | 0.009944 | 0.112243 | -2.7534  |
| Rab3il1    | -0.29087 | 4.394604 | -2.63447 | 0.020145 | 0.157584 | -3.40948 |
| Olfr1174-p | -0.29105 | 3.768131 | -3.4117  | 0.004437 | 0.076357 | -1.99412 |
| Foxi2      | -0.29113 | 4.335393 | -3.69353 | 0.002563 | 0.059276 | -1.47443 |
| Zeb2       | -0.29121 | 7.482164 | -2.16369 | 0.049031 | 0.240744 | -4.21753 |
| Pithd1     | -0.29122 | 4.406311 | -3.07719 | 0.008529 | 0.104487 | -2.60965 |
| Snrpn      | -0.29124 | 4.513397 | -3.05239 | 0.008952 | 0.106878 | -2.65504 |
| Ptcra      | -0.29126 | 4.266642 | -2.41234 | 0.030789 | 0.194616 | -3.7981  |
| Kdm6b      | -0.29141 | 7.294562 | -2.58753 | 0.022046 | 0.164435 | -3.49251 |
| Zfp853     | -0.29143 | 3.869424 | -2.99267 | 0.010059 | 0.112317 | -2.76415 |
| Khsrp      | -0.29155 | 7.193091 | -2.23427 | 0.043018 | 0.226835 | -4.10044 |
| 1700027J0  | -0.29158 | 3.73971  | -3.34746 | 0.00503  | 0.080753 | -2.11261 |
| Zfp689     | -0.29158 | 4.03162  | -2.78152 | 0.015165 | 0.137442 | -3.1468  |
| Pcsk9      | -0.29159 | 4.193236 | -3.68293 | 0.002616 | 0.06006  | -1.49395 |
| Gng7       | -0.29175 | 4.679321 | -2.5481  | 0.023776 | 0.170986 | -3.5619  |
| Vezf1      | -0.29192 | 8.707553 | -2.50016 | 0.026056 | 0.178543 | -3.6458  |
| Gpr25      | -0.29193 | 3.820341 | -3.83224 | 0.00196  | 0.052101 | -1.21951 |
| Rtn4r      | -0.29195 | 4.379413 | -2.21126 | 0.044897 | 0.230466 | -4.13879 |
| Olfr95     | -0.29212 | 3.765072 | -3.22657 | 0.00637  | 0.090341 | -2.33535 |
| Grm1       | -0.29226 | 6.265652 | -2.43599 | 0.029439 | 0.190146 | -3.75727 |
| Plekhg3    | -0.29233 | 5.495273 | -3.68128 | 0.002625 | 0.060087 | -1.497   |
| Trabd2b    | -0.29285 | 7.932675 | -2.73999 | 0.016435 | 0.142576 | -3.22135 |

|            |          |          |          |          |          |          |
|------------|----------|----------|----------|----------|----------|----------|
| Podnl1     | -0.29292 | 3.860211 | -3.2059  | 0.006633 | 0.092121 | -2.37337 |
| Gata1      | -0.29333 | 4.007141 | -2.89954 | 0.012059 | 0.121279 | -2.93357 |
| Tas2r107   | -0.29339 | 3.254347 | -3.46404 | 0.004006 | 0.072198 | -1.89755 |
| Tk1        | -0.29367 | 4.18601  | -2.42485 | 0.030068 | 0.19235  | -3.77653 |
| Olf1373    | -0.29368 | 4.142058 | -3.65344 | 0.002771 | 0.061599 | -1.54827 |
| Mov10l1    | -0.29371 | 3.950311 | -3.12337 | 0.007794 | 0.099356 | -2.52499 |
| Prtn3      | -0.29389 | 3.529566 | -2.5524  | 0.023581 | 0.170415 | -3.55435 |
| Gm16108    | -0.29396 | 3.806797 | -2.82995 | 0.013805 | 0.131294 | -3.05952 |
| Manba      | -0.29411 | 6.715413 | -2.5198  | 0.025098 | 0.175323 | -3.61149 |
| Orm2       | -0.29411 | 3.429196 | -3.93003 | 0.001623 | 0.04804  | -1.04039 |
| Panx2      | -0.29447 | 4.680403 | -2.45493 | 0.028399 | 0.186772 | -3.72447 |
| B230217C1  | -0.29462 | 4.352041 | -2.70539 | 0.017571 | 0.147342 | -3.28326 |
| Cpeb3      | -0.29464 | 6.758277 | -2.5553  | 0.023451 | 0.170065 | -3.54926 |
| Emc4       | -0.29486 | 8.75882  | -2.3656  | 0.033633 | 0.201376 | -3.87834 |
| Sh2d5      | -0.29502 | 4.083121 | -3.64033 | 0.002842 | 0.062253 | -1.57242 |
| Nsa2       | -0.29529 | 5.500468 | -2.30814 | 0.037471 | 0.211425 | -3.97615 |
| Olf1959    | -0.29542 | 3.543859 | -2.75828 | 0.015863 | 0.139942 | -3.18855 |
| Slc52a3    | -0.29549 | 4.514201 | -3.41579 | 0.004402 | 0.076151 | -1.98658 |
| Mir1899    | -0.29553 | 4.017276 | -3.65805 | 0.002746 | 0.061556 | -1.53978 |
| Tmem186    | -0.29554 | 6.713559 | -2.95356 | 0.010856 | 0.116122 | -2.83542 |
| Gm3948     | -0.29559 | 3.804189 | -4.79716 | 0.000317 | 0.025191 | 0.509686 |
| Olf1957    | -0.29603 | 3.567318 | -2.50384 | 0.025874 | 0.177784 | -3.63938 |
| Phtf2      | -0.29626 | 7.816386 | -4.23019 | 0.000914 | 0.037572 | -0.49506 |
| Tle2       | -0.29627 | 4.584449 | -2.94752 | 0.010984 | 0.116796 | -2.8464  |
| Slc1a7     | -0.29627 | 3.870824 | -2.46559 | 0.027829 | 0.184638 | -3.70598 |
| Mrps34     | -0.29628 | 7.324192 | -2.76985 | 0.015512 | 0.138613 | -3.16777 |
| Kctd6      | -0.29647 | 4.929891 | -2.20665 | 0.045283 | 0.231348 | -4.14646 |
| Zc3h12d    | -0.29653 | 3.874359 | -4.14931 | 0.001066 | 0.039677 | -0.64125 |
| Cox10      | -0.29676 | 8.441138 | -2.47882 | 0.027138 | 0.182188 | -3.68299 |
| Cacng8     | -0.29682 | 4.043971 | -2.66983 | 0.018819 | 0.152672 | -3.34667 |
| Bfsp2      | -0.29705 | 3.786858 | -2.97703 | 0.01037  | 0.113896 | -2.79266 |
| Krt79      | -0.29708 | 3.795064 | -5.12837 | 0.000174 | 0.019079 | 1.077392 |
| Spns3      | -0.29724 | 4.354797 | -2.86464 | 0.012906 | 0.126018 | -2.99682 |
| Rbm26      | -0.29774 | 7.082089 | -2.22337 | 0.043899 | 0.228426 | -4.11862 |
| Lgi4       | -0.29776 | 3.893277 | -3.62798 | 0.002911 | 0.062595 | -1.59518 |
| Inafm1     | -0.29808 | 5.334686 | -2.60096 | 0.021485 | 0.1626   | -3.4688  |
| Top3b      | -0.29822 | 5.991679 | -2.76192 | 0.015752 | 0.139409 | -3.18202 |
| Plagl2     | -0.29838 | 4.836322 | -2.35424 | 0.03436  | 0.202983 | -3.89774 |
| Micu2      | -0.29869 | 8.378323 | -2.63082 | 0.020287 | 0.158179 | -3.41596 |
| Areg       | -0.29872 | 3.761446 | -3.24803 | 0.006109 | 0.088386 | -2.29585 |
| 4932443119 | -0.29884 | 3.978999 | -2.53469 | 0.024394 | 0.17274  | -3.58542 |
| Cd164l2    | -0.29888 | 4.302058 | -2.60615 | 0.021272 | 0.162015 | -3.45962 |
| Erf        | -0.2989  | 4.512658 | -2.80414 | 0.014515 | 0.133939 | -3.10608 |
| Gm21136    | -0.29893 | 3.975861 | -2.62285 | 0.0206   | 0.159312 | -3.43007 |
| 1700018BC  | -0.29914 | 4.193368 | -3.152   | 0.00737  | 0.096938 | -2.47244 |
| Prn        | -0.29952 | 3.550759 | -3.31956 | 0.005312 | 0.083    | -2.16406 |
| 5730508BC  | -0.29977 | 4.949887 | -2.6155  | 0.020893 | 0.160601 | -3.44309 |
| Fam216b    | -0.30008 | 3.927599 | -3.3473  | 0.005032 | 0.080753 | -2.11291 |

|           |          |          |          |          |          |          |
|-----------|----------|----------|----------|----------|----------|----------|
| Nxt1      | -0.3002  | 4.194626 | -2.28977 | 0.038784 | 0.214718 | -4.00722 |
| Hpd1      | -0.30047 | 4.214513 | -3.36303 | 0.004879 | 0.079595 | -2.08391 |
| Il1f10    | -0.30086 | 4.158978 | -3.1991  | 0.006722 | 0.092763 | -2.38589 |
| Alx3      | -0.301   | 4.448946 | -2.25247 | 0.041584 | 0.222269 | -4.06998 |
| Olf1r549  | -0.30172 | 4.500995 | -3.41988 | 0.004367 | 0.075808 | -1.97903 |
| Pldi      | -0.30177 | 3.919264 | -4.13989 | 0.001086 | 0.039808 | -0.6583  |
| Nckap1l   | -0.302   | 4.73507  | -3.47277 | 0.003939 | 0.071617 | -1.88144 |
| Olf1r955  | -0.30247 | 3.508433 | -3.19648 | 0.006756 | 0.092951 | -2.39071 |
| Gm19461   | -0.3025  | 4.595008 | -2.9728  | 0.010456 | 0.114206 | -2.80037 |
| Abca6     | -0.30252 | 6.600528 | -2.40427 | 0.031263 | 0.195728 | -3.81199 |
| Dand5     | -0.30294 | 4.17991  | -2.60358 | 0.021377 | 0.162123 | -3.46418 |
| Dcakd     | -0.30315 | 7.216916 | -2.61147 | 0.021056 | 0.161233 | -3.45023 |
| Unc45b    | -0.30334 | 8.052104 | -2.72545 | 0.016903 | 0.144552 | -3.24739 |
| Hdac8     | -0.30343 | 4.539039 | -2.2882  | 0.038898 | 0.214843 | -4.00987 |
| Galp      | -0.30405 | 4.414383 | -3.92244 | 0.001647 | 0.048299 | -1.05428 |
| 5430421N2 | -0.30405 | 3.965    | -3.54605 | 0.003414 | 0.067035 | -1.74623 |
| Zbtb1     | -0.30412 | 5.387651 | -2.2892  | 0.038825 | 0.21472  | -4.00817 |
| Tmem240   | -0.30458 | 3.910456 | -3.74729 | 0.002309 | 0.056509 | -1.37552 |
| 4930413F2 | -0.30464 | 4.32766  | -3.12896 | 0.007709 | 0.098759 | -2.51473 |
| Pidd1     | -0.30465 | 4.261902 | -3.37905 | 0.004729 | 0.07842  | -2.05436 |
| Oaz1      | -0.30512 | 4.593045 | -2.39455 | 0.031843 | 0.1968   | -3.8287  |
| Uchl4     | -0.30517 | 4.067144 | -2.45311 | 0.028498 | 0.186926 | -3.72763 |
| Pls3      | -0.30518 | 7.20874  | -2.18316 | 0.047298 | 0.236834 | -4.1854  |
| Cpsf4     | -0.30518 | 5.326575 | -3.39693 | 0.004567 | 0.077338 | -2.02137 |
| Olf1r1197 | -0.30521 | 3.546777 | -4.28856 | 0.000819 | 0.035483 | -0.38993 |
| Adamts14  | -0.30523 | 4.176488 | -3.95375 | 0.00155  | 0.046786 | -0.99704 |
| Fam163a   | -0.30525 | 3.860721 | -3.26677 | 0.005889 | 0.087093 | -2.26135 |
| 1700054K1 | -0.30557 | 3.825243 | -3.17076 | 0.007105 | 0.09532  | -2.43798 |
| Sc5d      | -0.30601 | 6.113759 | -2.18827 | 0.046853 | 0.23567  | -4.17695 |
| Vax1      | -0.30616 | 4.097246 | -3.32563 | 0.005249 | 0.082595 | -2.15287 |
| Antxr1    | -0.30632 | 6.691406 | -2.29672 | 0.038283 | 0.213005 | -3.99548 |
| Pfkfb3    | -0.30652 | 5.193581 | -2.58699 | 0.022069 | 0.164506 | -3.49346 |
| Bag5      | -0.30665 | 5.291012 | -4.39096 | 0.000675 | 0.033    | -0.20639 |
| Mir99ahg  | -0.30683 | 4.274646 | -2.78155 | 0.015164 | 0.137442 | -3.14674 |
| Mrpl41    | -0.30691 | 5.687693 | -2.51579 | 0.025291 | 0.175817 | -3.61851 |
| Plekhh2   | -0.30781 | 5.009179 | -2.8044  | 0.014507 | 0.133921 | -3.10561 |
| Wipf1     | -0.30793 | 4.820157 | -2.45117 | 0.028603 | 0.187299 | -3.731   |
| Cep131    | -0.30831 | 5.311178 | -2.94034 | 0.011139 | 0.117558 | -2.85946 |
| 4930500L2 | -0.30859 | 3.736816 | -3.34823 | 0.005023 | 0.080753 | -2.11121 |
| Slurp1    | -0.30872 | 3.933611 | -2.45213 | 0.028551 | 0.187104 | -3.72933 |
| St5       | -0.30903 | 5.347439 | -2.32095 | 0.036581 | 0.208866 | -3.95442 |
| Mcc       | -0.30914 | 7.094944 | -3.12265 | 0.007805 | 0.099399 | -2.52632 |
| Kdelc1    | -0.30973 | 5.285075 | -3.78068 | 0.002165 | 0.05469  | -1.31415 |
| Smarcd2   | -0.30982 | 5.025753 | -2.72822 | 0.016813 | 0.144225 | -3.24242 |
| Gm10499   | -0.30997 | 4.13766  | -4.70945 | 0.000373 | 0.026719 | 0.356826 |
| Gm9767    | -0.31001 | 4.053655 | -3.31618 | 0.005347 | 0.083341 | -2.1703  |
| Ager      | -0.31021 | 4.20785  | -2.67056 | 0.018792 | 0.152621 | -3.34536 |
| Aqp12     | -0.31021 | 3.638596 | -3.36481 | 0.004862 | 0.079559 | -2.08061 |

|           |          |          |          |          |          |          |
|-----------|----------|----------|----------|----------|----------|----------|
| Otud3     | -0.31028 | 4.767225 | -2.83127 | 0.01377  | 0.131074 | -3.05714 |
| Hoxb9     | -0.31068 | 4.017839 | -3.87597 | 0.001801 | 0.05036  | -1.13934 |
| Pxt1      | -0.31073 | 4.24519  | -2.2684  | 0.040366 | 0.219225 | -4.04323 |
| Arrdc1    | -0.31077 | 4.099821 | -2.99331 | 0.010046 | 0.112245 | -2.76297 |
| Csrnp3    | -0.31078 | 3.731817 | -4.14565 | 0.001074 | 0.039677 | -0.64787 |
| Pex5l     | -0.31081 | 4.2165   | -4.00095 | 0.001416 | 0.044615 | -0.91089 |
| Sh3gl3    | -0.31119 | 3.713545 | -3.23951 | 0.006211 | 0.088897 | -2.31154 |
| Me3       | -0.31146 | 8.840363 | -3.68058 | 0.002628 | 0.060114 | -1.49828 |
| Abca12    | -0.31152 | 4.801273 | -2.32274 | 0.036459 | 0.208551 | -3.95139 |
| Olf1819   | -0.31158 | 3.675103 | -3.38667 | 0.004659 | 0.077947 | -2.0403  |
| Hmg20a    | -0.31168 | 6.126387 | -5.64539 | 7.03E-05 | 0.014445 | 1.931006 |
| 4930478LO | -0.31205 | 3.770245 | -4.34828 | 0.000731 | 0.03367  | -0.28276 |
| Susd5     | -0.3124  | 4.136605 | -4.74016 | 0.000352 | 0.025999 | 0.410457 |
| Anapc2    | -0.31252 | 6.894521 | -2.73697 | 0.016531 | 0.14298  | -3.22676 |
| Rnf183    | -0.31253 | 3.833886 | -3.27793 | 0.005762 | 0.086188 | -2.24079 |
| Wrb       | -0.31262 | 5.925073 | -2.39741 | 0.031671 | 0.196427 | -3.82379 |
| Apoa4     | -0.31285 | 4.223458 | -2.54484 | 0.023925 | 0.171454 | -3.56763 |
| Rpl36al   | -0.31285 | 4.849108 | -2.36062 | 0.03395  | 0.202007 | -3.88685 |
| 4732471JO | -0.31288 | 4.296036 | -2.94826 | 0.010968 | 0.116796 | -2.84506 |
| Olf1656   | -0.31293 | 3.641958 | -3.33822 | 0.005122 | 0.081593 | -2.12966 |
| Gm10941   | -0.31367 | 3.789373 | -4.29787 | 0.000804 | 0.035081 | -0.37319 |
| E2f1      | -0.31443 | 4.124524 | -3.33791 | 0.005125 | 0.081593 | -2.13024 |
| Hcfc2     | -0.31449 | 5.685042 | -2.37547 | 0.033012 | 0.199438 | -3.86145 |
| Hcrt      | -0.31459 | 3.932631 | -3.24859 | 0.006102 | 0.088386 | -2.29483 |
| Aph1b     | -0.31468 | 4.892627 | -4.37294 | 0.000698 | 0.033123 | -0.2386  |
| Ache      | -0.31486 | 4.303184 | -3.01067 | 0.009712 | 0.110923 | -2.73129 |
| 1700011BC | -0.31493 | 3.481287 | -5.81542 | 5.26E-05 | 0.012606 | 2.202602 |
| Abcg4     | -0.31523 | 4.018494 | -3.23568 | 0.006258 | 0.089253 | -2.31859 |
| Rab5a     | -0.31525 | 8.08847  | -3.14874 | 0.007417 | 0.097228 | -2.47843 |
| 2310003HC | -0.31535 | 5.512899 | -3.40441 | 0.004501 | 0.07686  | -2.00757 |
| Memo1     | -0.31544 | 5.858066 | -2.16635 | 0.048791 | 0.240187 | -4.21316 |
| Tmem242   | -0.31599 | 6.70301  | -2.57537 | 0.022566 | 0.166143 | -3.51395 |
| Olf13     | -0.31638 | 3.416759 | -3.1763  | 0.007028 | 0.094671 | -2.4278  |
| Mettl14   | -0.31671 | 6.769379 | -3.13259 | 0.007655 | 0.09838  | -2.50808 |
| Peg10     | -0.31676 | 4.70197  | -3.99628 | 0.001429 | 0.04468  | -0.9194  |
| Ube2i     | -0.31679 | 3.961802 | -2.64625 | 0.019693 | 0.155717 | -3.38858 |
| Ccdc9     | -0.31688 | 4.410243 | -3.84019 | 0.00193  | 0.051921 | -1.20493 |
| Cmtr2     | -0.31692 | 3.834298 | -3.7797  | 0.002169 | 0.05469  | -1.31596 |
| Sdhaf4    | -0.31706 | 4.504881 | -2.67096 | 0.018778 | 0.152621 | -3.34465 |
| Socs5     | -0.31738 | 4.917321 | -4.1324  | 0.001101 | 0.03993  | -0.67189 |
| Mbtps2    | -0.3175  | 6.344506 | -3.0156  | 0.009619 | 0.11045  | -2.7223  |
| Pcmt1     | -0.31751 | 8.41058  | -5.52863 | 8.60E-05 | 0.014927 | 1.74185  |
| Gng10     | -0.31763 | 6.067583 | -2.307   | 0.037552 | 0.211735 | -3.97808 |
| Ankrd39   | -0.31773 | 5.082184 | -4.06569 | 0.001251 | 0.042022 | -0.793   |
| Nt5c2     | -0.31783 | 7.621033 | -3.72759 | 0.002399 | 0.057456 | -1.41175 |
| Olf1266   | -0.31791 | 3.540265 | -4.7261  | 0.000362 | 0.026433 | 0.385931 |
| Slc6a20a  | -0.31838 | 4.06851  | -2.95373 | 0.010852 | 0.116122 | -2.8351  |
| 4933439C1 | -0.31859 | 5.063851 | -2.99439 | 0.010025 | 0.112245 | -2.76101 |



|           |          |          |          |          |          |          |
|-----------|----------|----------|----------|----------|----------|----------|
| Zfp948    | -0.31864 | 4.896016 | -2.40425 | 0.031265 | 0.195728 | -3.81204 |
| Rpl22     | -0.31915 | 4.735769 | -2.62892 | 0.020361 | 0.15847  | -3.41933 |
| Negr1     | -0.31916 | 4.094977 | -3.28753 | 0.005655 | 0.08546  | -2.22309 |
| Polr3g    | -0.31927 | 5.076855 | -2.8728  | 0.012703 | 0.124972 | -2.98204 |
| Taar9     | -0.31939 | 3.300184 | -3.99901 | 0.001421 | 0.044615 | -0.91443 |
| Aprt      | -0.31941 | 4.954878 | -2.95413 | 0.010843 | 0.116093 | -2.83438 |
| Lypd4     | -0.31943 | 3.728304 | -4.52079 | 0.000529 | 0.030313 | 0.024673 |
| Med10     | -0.31949 | 5.427823 | -2.19187 | 0.046541 | 0.235071 | -4.17099 |
| Trav12-3  | -0.31955 | 3.614478 | -2.70351 | 0.017635 | 0.14745  | -3.28662 |
| 1700105PC | -0.31959 | 4.505246 | -3.61806 | 0.002968 | 0.062847 | -1.61347 |
| Oas3      | -0.31963 | 4.028012 | -2.514   | 0.025377 | 0.176075 | -3.62164 |
| Trnau1ap  | -0.31974 | 5.324344 | -2.39869 | 0.031595 | 0.196396 | -3.8216  |
| Gpr155    | -0.31975 | 6.827267 | -2.69015 | 0.018096 | 0.149504 | -3.31045 |
| Tac1      | -0.31982 | 3.689697 | -3.76609 | 0.002227 | 0.055528 | -1.34097 |
| Hoxb1     | -0.3199  | 3.908412 | -3.59538 | 0.003102 | 0.064522 | -1.65526 |
| Sftpa1    | -0.32017 | 3.974843 | -2.83248 | 0.013738 | 0.130853 | -3.05497 |
| Six3      | -0.32052 | 4.376522 | -2.78124 | 0.015173 | 0.137442 | -3.1473  |
| Snca      | -0.32055 | 4.147179 | -3.44552 | 0.004154 | 0.073862 | -1.93171 |
| Shisa2    | -0.3206  | 4.179545 | -3.1304  | 0.007687 | 0.098612 | -2.5121  |
| 9530082P2 | -0.32078 | 4.167735 | -2.92122 | 0.011561 | 0.119853 | -2.89422 |
| Enoph1    | -0.3208  | 5.958415 | -2.7104  | 0.017402 | 0.146747 | -3.2743  |
| Sec16b    | -0.32086 | 4.129771 | -4.41439 | 0.000646 | 0.032755 | -0.16454 |
| Xylt2     | -0.32087 | 4.720098 | -2.31858 | 0.036744 | 0.209383 | -3.95845 |
| A730085EC | -0.32095 | 4.402837 | -3.22203 | 0.006427 | 0.090568 | -2.34371 |
| Ier3ip1   | -0.32122 | 6.712436 | -3.29744 | 0.005547 | 0.084749 | -2.20484 |
| Gm10007   | -0.32127 | 4.373706 | -3.29646 | 0.005557 | 0.084807 | -2.20665 |
| Smim14    | -0.32138 | 7.769162 | -4.14783 | 0.001069 | 0.039677 | -0.64393 |
| Gm1070    | -0.32163 | 4.47623  | -3.98586 | 0.001458 | 0.045242 | -0.93843 |
| Gm9079    | -0.32176 | 4.07545  | -4.17236 | 0.001021 | 0.039214 | -0.59952 |
| Trpc1     | -0.32193 | 6.003262 | -2.43895 | 0.029274 | 0.189688 | -3.75215 |
| Sh3pxd2a  | -0.32222 | 5.523136 | -2.45324 | 0.02849  | 0.186926 | -3.7274  |
| Axin2     | -0.32226 | 4.429364 | -3.89093 | 0.00175  | 0.049941 | -1.11194 |
| Foxc2     | -0.32247 | 4.21393  | -3.18898 | 0.006856 | 0.093296 | -2.40449 |
| Acrbp     | -0.32252 | 4.518589 | -2.97203 | 0.010472 | 0.114295 | -2.80177 |
| H2-Q10    | -0.32267 | 3.873742 | -2.51524 | 0.025317 | 0.17589  | -3.61947 |
| Pitpnm2   | -0.32275 | 6.09904  | -2.32027 | 0.036628 | 0.209012 | -3.95558 |
| A930016O  | -0.32277 | 4.731194 | -2.61868 | 0.020766 | 0.160074 | -3.43746 |
| Tmem247   | -0.32291 | 3.77645  | -2.41957 | 0.03037  | 0.193118 | -3.78563 |
| Esco1     | -0.32329 | 6.273739 | -3.34789 | 0.005026 | 0.080753 | -2.11183 |
| Cacna1g   | -0.32332 | 4.401001 | -3.0627  | 0.008774 | 0.106039 | -2.63617 |
| Acp6      | -0.32347 | 6.461965 | -2.5739  | 0.02263  | 0.166441 | -3.51653 |
| Gm11783   | -0.32349 | 3.859005 | -2.3989  | 0.031582 | 0.196396 | -3.82123 |
| 4833428L1 | -0.3235  | 3.93306  | -3.01311 | 0.009666 | 0.110879 | -2.72684 |
| Psip1     | -0.32366 | 5.231398 | -2.57226 | 0.022701 | 0.166818 | -3.51942 |
| Pde4b     | -0.32368 | 5.150496 | -3.95457 | 0.001548 | 0.046786 | -0.99554 |
| Vps37d    | -0.32369 | 4.100525 | -3.42981 | 0.004283 | 0.075034 | -1.9607  |
| Fam159b   | -0.32374 | 3.984775 | -2.60166 | 0.021456 | 0.1626   | -3.46756 |
| Ybx2      | -0.32392 | 4.898587 | -3.15887 | 0.007272 | 0.096052 | -2.45983 |

|            |          |          |          |          |          |          |
|------------|----------|----------|----------|----------|----------|----------|
| Zfp142     | -0.32393 | 5.965641 | -3.89521 | 0.001735 | 0.049702 | -1.1041  |
| Rrbp1      | -0.32435 | 7.336361 | -3.65671 | 0.002753 | 0.061581 | -1.54223 |
| Rilp       | -0.3245  | 8.022156 | -2.91871 | 0.011618 | 0.11989  | -2.89878 |
| Gm29035    | -0.32456 | 3.822094 | -3.5681  | 0.003271 | 0.066221 | -1.70556 |
| Tnni2      | -0.32463 | 4.213825 | -2.47112 | 0.027538 | 0.18349  | -3.69638 |
| Gm536      | -0.32463 | 3.928911 | -2.94832 | 0.010967 | 0.116796 | -2.84495 |
| Rps3       | -0.32484 | 6.69712  | -2.61498 | 0.020914 | 0.160601 | -3.444   |
| Ptpn5      | -0.32484 | 4.159034 | -4.79674 | 0.000318 | 0.025191 | 0.508969 |
| Fam53c     | -0.32507 | 5.782617 | -3.46059 | 0.004033 | 0.072553 | -1.90392 |
| 4930451111 | -0.32514 | 3.77802  | -4.65835 | 0.00041  | 0.027213 | 0.267297 |
| Olfr455    | -0.32536 | 4.167397 | -3.50945 | 0.003667 | 0.069162 | -1.81376 |
| 4930579G2  | -0.32557 | 4.181778 | -4.24945 | 0.000882 | 0.037172 | -0.46032 |
| Dek        | -0.32585 | 6.583818 | -4.02917 | 0.001342 | 0.04352  | -0.85946 |
| Scg2       | -0.32601 | 3.767088 | -2.78081 | 0.015186 | 0.137481 | -3.14808 |
| Olfr1371   | -0.32639 | 4.166723 | -3.1703  | 0.007111 | 0.09532  | -2.43883 |
| Defb36     | -0.32655 | 4.070774 | -3.22009 | 0.006452 | 0.090717 | -2.34727 |
| Sst        | -0.32659 | 3.967892 | -4.44724 | 0.000607 | 0.031585 | -0.10598 |
| LOC102631  | -0.32667 | 4.231683 | -3.70008 | 0.002531 | 0.058746 | -1.46238 |
| Muc4       | -0.3267  | 4.069395 | -2.66286 | 0.019073 | 0.153648 | -3.35907 |
| Tssk5      | -0.32674 | 3.793089 | -4.7941  | 0.000319 | 0.025191 | 0.504385 |
| E130102H2  | -0.32681 | 4.180671 | -2.23352 | 0.043078 | 0.226909 | -4.1017  |
| 1700101E0  | -0.32687 | 4.029273 | -4.04861 | 0.001292 | 0.042778 | -0.82408 |
| Sgsm3      | -0.32723 | 4.177692 | -2.48521 | 0.026809 | 0.181067 | -3.67186 |
| Prkrip1    | -0.32726 | 4.834907 | -2.38067 | 0.03269  | 0.198714 | -3.85253 |
| 4933405D1  | -0.32748 | 3.786209 | -2.95074 | 0.010915 | 0.116461 | -2.84055 |
| Fam132a    | -0.32771 | 4.654177 | -2.37946 | 0.032764 | 0.198877 | -3.8546  |
| Gm10714    | -0.32772 | 4.004434 | -2.57628 | 0.022527 | 0.166143 | -3.51234 |
| Kank2      | -0.32776 | 7.335958 | -2.8066  | 0.014445 | 0.13377  | -3.10165 |
| Dnaja4     | -0.32793 | 7.580176 | -3.02186 | 0.009502 | 0.109718 | -2.71086 |
| Asb1       | -0.32797 | 5.067461 | -2.92581 | 0.011458 | 0.119389 | -2.88589 |
| Zfp524     | -0.32823 | 5.66352  | -2.38142 | 0.032644 | 0.19855  | -3.85125 |
| Bahd1      | -0.32829 | 4.65633  | -3.47626 | 0.003912 | 0.071455 | -1.875   |
| Mir9-3     | -0.32834 | 4.239153 | -2.53494 | 0.024382 | 0.17274  | -3.58498 |
| Gm31683    | -0.32835 | 3.960909 | -2.24674 | 0.04203  | 0.223838 | -4.07958 |
| Pex1       | -0.32929 | 4.431385 | -2.46338 | 0.027946 | 0.18497  | -3.70981 |
| Zfp472     | -0.3293  | 4.045312 | -4.51125 | 0.000539 | 0.030405 | 0.007766 |
| Trim43c    | -0.32932 | 3.824682 | -3.81266 | 0.002035 | 0.053367 | -1.25544 |
| Ehd4       | -0.32959 | 10.02694 | -2.41951 | 0.030374 | 0.193118 | -3.78574 |
| Lvrn       | -0.32975 | 4.642415 | -2.17766 | 0.047782 | 0.237892 | -4.1945  |
| Gm8801     | -0.33008 | 4.913571 | -2.79772 | 0.014696 | 0.134815 | -3.11764 |
| Gpm6b      | -0.33025 | 5.334062 | -2.54006 | 0.024144 | 0.17248  | -3.57601 |
| 2610035D1  | -0.33029 | 4.502009 | -3.7314  | 0.002382 | 0.057429 | -1.40475 |
| H2-Q2      | -0.33037 | 3.800556 | -2.86628 | 0.012865 | 0.125887 | -2.99386 |
| 4930579DC  | -0.33049 | 4.880166 | -2.47777 | 0.027192 | 0.182265 | -3.68481 |
| Wfdc10     | -0.3305  | 4.365351 | -3.41035 | 0.004449 | 0.076357 | -1.99661 |
| Gm14487    | -0.33058 | 3.984122 | -2.31675 | 0.036871 | 0.209845 | -3.96155 |
| Avp        | -0.33067 | 4.492054 | -2.69515 | 0.017922 | 0.148662 | -3.30154 |
| Ftsj1      | -0.33084 | 6.62185  | -2.34804 | 0.034764 | 0.204166 | -3.90832 |

|           |          |          |          |          |          |          |
|-----------|----------|----------|----------|----------|----------|----------|
| Gm20757   | -0.33086 | 3.719905 | -2.37641 | 0.032954 | 0.199326 | -3.85984 |
| 2010107G2 | -0.33106 | 5.438961 | -2.92627 | 0.011448 | 0.119378 | -2.88505 |
| Tonsl     | -0.33119 | 3.79933  | -3.41091 | 0.004444 | 0.076357 | -1.99557 |
| Sgcd      | -0.33124 | 6.443915 | -2.50748 | 0.025695 | 0.177101 | -3.63303 |
| Mrgprg    | -0.33146 | 3.999798 | -3.33966 | 0.005107 | 0.081494 | -2.127   |
| 2010009K1 | -0.33181 | 3.875354 | -3.20379 | 0.00666  | 0.092328 | -2.37726 |
| Cacng6    | -0.33205 | 3.693268 | -4.20384 | 0.000961 | 0.038235 | -0.54261 |
| Mxd3      | -0.33208 | 3.975481 | -4.0385  | 0.001318 | 0.043116 | -0.84248 |
| 6030419C1 | -0.3321  | 4.64336  | -2.48421 | 0.02686  | 0.181257 | -3.67361 |
| Tm7sf2    | -0.33229 | 4.600293 | -3.5111  | 0.003655 | 0.069102 | -1.81071 |
| Dmbx1     | -0.3323  | 3.667267 | -2.75745 | 0.015889 | 0.140119 | -3.19005 |
| Gm12522   | -0.3326  | 3.782269 | -3.0694  | 0.00866  | 0.105173 | -2.62391 |
| Rrp8      | -0.33301 | 4.401689 | -2.3516  | 0.034532 | 0.203418 | -3.90226 |
| Ninl      | -0.3332  | 4.387926 | -3.73982 | 0.002343 | 0.056997 | -1.38926 |
| P2ry1     | -0.3332  | 7.121975 | -2.43995 | 0.029219 | 0.189508 | -3.75043 |
| Zfand1    | -0.33345 | 5.110294 | -2.58247 | 0.022261 | 0.165295 | -3.50144 |
| Ghrhr     | -0.33345 | 3.911725 | -3.45221 | 0.0041   | 0.073296 | -1.91937 |
| Nkx1-1    | -0.33366 | 4.866536 | -2.66534 | 0.018982 | 0.153364 | -3.35465 |
| Ppifos    | -0.3337  | 4.690082 | -2.44792 | 0.02878  | 0.188035 | -3.73663 |
| Gm20939   | -0.33374 | 3.989705 | -4.20475 | 0.00096  | 0.038231 | -0.54097 |
| A430046D  | -0.33406 | 5.372359 | -3.63052 | 0.002897 | 0.062461 | -1.5905  |
| Spata5l1  | -0.33441 | 5.062937 | -3.05583 | 0.008893 | 0.106694 | -2.64875 |
| Satb1     | -0.33445 | 6.266856 | -3.17912 | 0.006989 | 0.09438  | -2.42261 |
| Dpep1     | -0.33457 | 9.402703 | -2.65551 | 0.019345 | 0.15454  | -3.37214 |
| Hnrnp1    | -0.335   | 8.859517 | -2.7032  | 0.017645 | 0.14745  | -3.28716 |
| Foxe1     | -0.33511 | 4.644296 | -2.26733 | 0.040446 | 0.219298 | -4.04502 |
| Traj39    | -0.33511 | 4.597258 | -2.18868 | 0.046817 | 0.23567  | -4.17627 |
| Dnaaf1    | -0.3353  | 4.057448 | -4.02449 | 0.001354 | 0.043702 | -0.86799 |
| Fhl2      | -0.3353  | 11.77669 | -2.7003  | 0.017745 | 0.147997 | -3.29234 |
| Mir431    | -0.33536 | 4.313929 | -2.76758 | 0.01558  | 0.138725 | -3.17185 |
| Hyls1     | -0.33537 | 4.283322 | -2.33437 | 0.03567  | 0.206402 | -3.93162 |
| C130074G  | -0.33538 | 4.882114 | -2.70459 | 0.017598 | 0.147342 | -3.28468 |
| Ccl5      | -0.3354  | 4.12413  | -4.28683 | 0.000821 | 0.03551  | -0.39305 |
| Cypt3     | -0.33543 | 4.047457 | -3.01195 | 0.009687 | 0.110879 | -2.72895 |
| Mir5125   | -0.33554 | 8.579624 | -2.87875 | 0.012557 | 0.124368 | -2.97127 |
| Cfd       | -0.33559 | 4.003184 | -2.1729  | 0.048204 | 0.238969 | -4.20236 |
| Gm6194    | -0.33584 | 4.897024 | -2.70688 | 0.017521 | 0.147299 | -3.28059 |
| Gm20324   | -0.33665 | 4.352022 | -3.04361 | 0.009107 | 0.107708 | -2.67109 |
| C330021F2 | -0.33689 | 3.748711 | -3.96425 | 0.001519 | 0.046349 | -0.97787 |
| Gad1os    | -0.33701 | 3.882031 | -3.48582 | 0.00384  | 0.070709 | -1.85737 |
| Pde1a     | -0.33711 | 4.81419  | -2.23335 | 0.043092 | 0.226909 | -4.10198 |
| Cc2d2a    | -0.33726 | 5.242503 | -2.37494 | 0.033045 | 0.199443 | -3.86236 |
| Kif6      | -0.33734 | 4.239371 | -3.57526 | 0.003226 | 0.06579  | -1.69236 |
| Plekhd1os | -0.33737 | 3.765316 | -3.47246 | 0.003941 | 0.071617 | -1.882   |
| Olfr857   | -0.33751 | 3.680608 | -4.13117 | 0.001104 | 0.039942 | -0.67412 |
| Mansc4    | -0.33779 | 4.092497 | -2.99334 | 0.010046 | 0.112245 | -2.76292 |
| Dis3      | -0.33804 | 6.844326 | -3.36396 | 0.004871 | 0.079559 | -2.0822  |
| Pabpc4l   | -0.3381  | 3.524148 | -4.19618 | 0.000975 | 0.038427 | -0.55645 |

|           |          |          |          |          |          |          |
|-----------|----------|----------|----------|----------|----------|----------|
| BC051226  | -0.33855 | 4.399573 | -2.75659 | 0.015915 | 0.140291 | -3.19159 |
| C1qtnf4   | -0.33858 | 5.470523 | -2.76676 | 0.015605 | 0.138772 | -3.17332 |
| Astl      | -0.33904 | 3.734372 | -4.06864 | 0.001244 | 0.041978 | -0.78764 |
| Ush1g     | -0.33922 | 4.33511  | -3.1306  | 0.007684 | 0.098612 | -2.51173 |
| Btn1a1    | -0.3393  | 3.723987 | -4.08829 | 0.001198 | 0.041308 | -0.75193 |
| Ddrgk1    | -0.33932 | 7.773861 | -4.99482 | 0.000222 | 0.021397 | 0.850359 |
| Pabpn1    | -0.33971 | 7.404202 | -2.77878 | 0.015246 | 0.137673 | -3.15173 |
| Itsn1     | -0.33971 | 5.211656 | -3.99663 | 0.001428 | 0.04468  | -0.91878 |
| Cuzd1     | -0.33977 | 3.680294 | -3.63378 | 0.002879 | 0.062351 | -1.58448 |
| Rpl41     | -0.33986 | 4.370433 | -3.38799 | 0.004647 | 0.077851 | -2.03786 |
| Rbm18     | -0.33997 | 7.366638 | -2.53053 | 0.024588 | 0.173459 | -3.59272 |
| Slc25a48  | -0.34026 | 4.10005  | -4.46161 | 0.000591 | 0.031294 | -0.0804  |
| 1700006J1 | -0.34032 | 3.902351 | -3.62921 | 0.002904 | 0.062565 | -1.59291 |
| Sstr5     | -0.34043 | 3.769158 | -2.78543 | 0.015051 | 0.136955 | -3.13977 |
| 0610037L1 | -0.34046 | 6.492042 | -2.47774 | 0.027193 | 0.182265 | -3.68486 |
| 1700120E1 | -0.3406  | 3.738473 | -3.78125 | 0.002163 | 0.05469  | -1.31311 |
| Ccm2      | -0.34066 | 4.88289  | -2.81907 | 0.0141   | 0.132472 | -3.07916 |
| H2-K2     | -0.34077 | 5.352075 | -2.8476  | 0.01334  | 0.128643 | -3.02764 |
| Med12l    | -0.34098 | 5.289795 | -2.48549 | 0.026795 | 0.181067 | -3.67137 |
| Sertad4   | -0.341   | 4.152089 | -2.90837 | 0.011854 | 0.120476 | -2.91755 |
| Trbj1-2   | -0.34119 | 5.117493 | -2.69879 | 0.017796 | 0.148124 | -3.29504 |
| Bmp3      | -0.34163 | 4.04598  | -2.86608 | 0.01287  | 0.125887 | -2.99421 |
| Tcte1     | -0.34181 | 4.205236 | -3.7282  | 0.002397 | 0.057456 | -1.41063 |
| Dcn       | -0.34189 | 11.7965  | -4.1455  | 0.001074 | 0.039677 | -0.64814 |
| Lppr3     | -0.34228 | 4.17147  | -3.78259 | 0.002157 | 0.054662 | -1.31065 |
| Snora5c   | -0.34237 | 9.097371 | -2.34677 | 0.034848 | 0.204416 | -3.9105  |
| Mir539    | -0.34239 | 3.911977 | -3.32469 | 0.005259 | 0.082688 | -2.15461 |
| Cap2      | -0.34241 | 9.757833 | -4.36682 | 0.000706 | 0.033174 | -0.24955 |
| Defa-rs1  | -0.34249 | 4.403788 | -2.52408 | 0.024893 | 0.174931 | -3.604   |
| Prok1     | -0.3425  | 4.036109 | -2.76786 | 0.015572 | 0.138715 | -3.17135 |
| Tnn       | -0.34253 | 4.145791 | -2.51043 | 0.025551 | 0.176687 | -3.62788 |
| Vmo1      | -0.34254 | 3.760617 | -4.90208 | 0.000262 | 0.023269 | 0.691188 |
| Atxn10    | -0.34262 | 8.723874 | -2.2489  | 0.041861 | 0.223135 | -4.07595 |
| Epha10    | -0.34269 | 4.283895 | -3.78979 | 0.002127 | 0.054522 | -1.29744 |
| Pdgfra    | -0.3431  | 7.98763  | -2.63939 | 0.019955 | 0.156691 | -3.40076 |
| 0610009B2 | -0.34332 | 4.416233 | -3.69091 | 0.002576 | 0.059522 | -1.47926 |
| Dnajc25   | -0.34361 | 6.611396 | -2.30561 | 0.03765  | 0.211999 | -3.98044 |
| Catsperg1 | -0.34382 | 3.747603 | -3.25576 | 0.006017 | 0.087839 | -2.28163 |
| Dnajb14   | -0.34418 | 4.95291  | -2.87101 | 0.012747 | 0.125301 | -2.98529 |
| Kcna2     | -0.34427 | 3.757229 | -4.84433 | 0.000291 | 0.024372 | 0.591474 |
| Gm830     | -0.34447 | 3.776335 | -2.99159 | 0.01008  | 0.112371 | -2.76612 |
| Slc30a3   | -0.34483 | 3.986847 | -4.05266 | 0.001283 | 0.042624 | -0.81671 |
| Btbd17    | -0.34502 | 3.847917 | -2.97376 | 0.010436 | 0.114162 | -2.79862 |
| 1700047K1 | -0.34538 | 4.452474 | -3.33601 | 0.005144 | 0.081722 | -2.13374 |
| Flnc      | -0.34561 | 8.833052 | -2.39936 | 0.031555 | 0.196396 | -3.82043 |
| LOC10263  | -0.34562 | 3.596638 | -2.16048 | 0.049323 | 0.241398 | -4.22283 |
| Crocc     | -0.34568 | 4.504244 | -2.2354  | 0.042927 | 0.2267   | -4.09854 |
| Ubxn10    | -0.34573 | 4.272775 | -2.9859  | 0.010192 | 0.112865 | -2.77649 |

|           |          |          |          |          |          |          |
|-----------|----------|----------|----------|----------|----------|----------|
| Htati2    | -0.34587 | 5.675371 | -2.73227 | 0.016682 | 0.143696 | -3.23518 |
| Perp      | -0.34593 | 9.520393 | -3.61447 | 0.002989 | 0.063125 | -1.62007 |
| Arx       | -0.34611 | 4.231405 | -3.87479 | 0.001805 | 0.050363 | -1.14151 |
| Tceal3    | -0.34622 | 4.706775 | -2.2915  | 0.038659 | 0.21433  | -4.0043  |
| Zfp35     | -0.34629 | 3.958203 | -3.65054 | 0.002786 | 0.061792 | -1.55361 |
| Nrap      | -0.34638 | 10.99803 | -3.21836 | 0.006473 | 0.090921 | -2.35046 |
| Smyd2     | -0.34644 | 8.616818 | -2.69541 | 0.017913 | 0.148637 | -3.30107 |
| Slc8a1    | -0.34657 | 8.881076 | -2.97912 | 0.010328 | 0.113608 | -2.78886 |
| BC024139  | -0.34657 | 4.056695 | -3.75835 | 0.002261 | 0.056085 | -1.3552  |
| Ccdc23    | -0.34681 | 5.151303 | -2.75324 | 0.016019 | 0.140682 | -3.19759 |
| Pdgfa     | -0.34697 | 7.236508 | -3.41735 | 0.004388 | 0.076026 | -1.9837  |
| Hck       | -0.34706 | 4.086726 | -3.01019 | 0.009721 | 0.110955 | -2.73217 |
| Pisd-ps2  | -0.34706 | 3.859428 | -2.18659 | 0.046998 | 0.236132 | -4.17972 |
| Olfr143   | -0.34709 | 3.533159 | -3.72362 | 0.002418 | 0.057456 | -1.41906 |
| Zfp384    | -0.34718 | 6.659743 | -3.74979 | 0.002298 | 0.05644  | -1.37093 |
| Prmp5     | -0.34748 | 4.657642 | -2.37783 | 0.032866 | 0.198988 | -3.8574  |
| Pkd2l2    | -0.34772 | 4.447233 | -2.59966 | 0.021539 | 0.162659 | -3.47109 |
| Polr1e    | -0.34787 | 5.473687 | -2.19314 | 0.046432 | 0.234707 | -4.16887 |
| Spire2    | -0.34791 | 4.103551 | -3.43844 | 0.004211 | 0.074422 | -1.94479 |
| Hypm      | -0.34803 | 3.850072 | -4.1471  | 0.001071 | 0.039677 | -0.64524 |
| Tceal6    | -0.3483  | 3.728845 | -3.52447 | 0.003561 | 0.068153 | -1.78605 |
| Gm6034    | -0.34836 | 4.585424 | -3.20746 | 0.006613 | 0.091949 | -2.3705  |
| Trim60    | -0.34848 | 3.560133 | -5.21271 | 0.00015  | 0.017742 | 1.219421 |
| Camk2n1   | -0.34863 | 6.579593 | -2.17073 | 0.048397 | 0.23956  | -4.20592 |
| Por       | -0.34863 | 6.686198 | -2.86976 | 0.012778 | 0.125363 | -2.98756 |
| Dmrt1     | -0.34873 | 3.893912 | -4.35715 | 0.000719 | 0.033465 | -0.26686 |
| Atf6b     | -0.34886 | 4.958218 | -3.16821 | 0.00714  | 0.09532  | -2.44268 |
| Ppp1r1a   | -0.34951 | 4.724006 | -2.59229 | 0.021846 | 0.163677 | -3.48411 |
| Sdf2      | -0.34958 | 5.270525 | -2.52239 | 0.024974 | 0.174974 | -3.60697 |
| Lbr       | -0.34968 | 5.095015 | -4.46657 | 0.000586 | 0.031294 | -0.07159 |
| Papd7     | -0.34983 | 5.790578 | -3.66868 | 0.00269  | 0.060969 | -1.52019 |
| Gkn1      | -0.3499  | 3.867935 | -5.28513 | 0.000132 | 0.017404 | 1.340516 |
| Gm5415    | -0.35006 | 3.581397 | -3.6703  | 0.002681 | 0.060932 | -1.5172  |
| Hnrnp3    | -0.35008 | 8.432709 | -3.36069 | 0.004902 | 0.079707 | -2.08822 |
| Itih1     | -0.35022 | 4.009133 | -5.2791  | 0.000133 | 0.017404 | 1.330468 |
| Pbdc1     | -0.35028 | 5.270498 | -2.79779 | 0.014694 | 0.134815 | -3.11753 |
| Cep41     | -0.35032 | 4.217904 | -3.03573 | 0.009248 | 0.108326 | -2.68551 |
| Prkca     | -0.35065 | 6.35202  | -2.66297 | 0.019069 | 0.153648 | -3.35887 |
| A93000711 | -0.35078 | 4.254786 | -3.18695 | 0.006883 | 0.093439 | -2.40823 |
| Fgf17     | -0.35083 | 4.388387 | -3.10526 | 0.008074 | 0.101841 | -2.55821 |
| Zbed3     | -0.35116 | 6.006877 | -3.48056 | 0.003879 | 0.071224 | -1.86706 |
| Tmem263   | -0.35152 | 4.709822 | -2.6849  | 0.01828  | 0.150181 | -3.31983 |
| Mir329    | -0.35168 | 4.306091 | -3.57809 | 0.003208 | 0.065756 | -1.68714 |
| F8a       | -0.3518  | 4.147832 | -3.85282 | 0.001883 | 0.051557 | -1.18177 |
| Defb4     | -0.35188 | 4.192225 | -2.36074 | 0.033942 | 0.202007 | -3.88665 |
| D630045J1 | -0.352   | 4.407823 | -3.43909 | 0.004206 | 0.074422 | -1.94358 |
| C87499    | -0.35229 | 3.715213 | -3.24722 | 0.006118 | 0.088386 | -2.29733 |
| Gm15461   | -0.35247 | 4.390006 | -3.22741 | 0.00636  | 0.090244 | -2.3338  |

|           |          |          |          |          |          |          |
|-----------|----------|----------|----------|----------|----------|----------|
| Mir324    | -0.35278 | 5.905806 | -2.16478 | 0.048933 | 0.240408 | -4.21575 |
| Gnat1     | -0.35295 | 3.956418 | -2.48093 | 0.027029 | 0.182017 | -3.67931 |
| Mpeg1     | -0.35306 | 4.498111 | -2.53433 | 0.02441  | 0.17274  | -3.58604 |
| Pigp      | -0.35317 | 5.306814 | -2.30617 | 0.03761  | 0.211872 | -3.97949 |
| Mir330    | -0.35335 | 4.831465 | -3.28794 | 0.00565  | 0.085444 | -2.22234 |
| Kcnc3     | -0.35373 | 5.663795 | -4.16587 | 0.001033 | 0.039457 | -0.61127 |
| Slc16a7   | -0.35389 | 5.021949 | -3.05218 | 0.008956 | 0.106878 | -2.65542 |
| Stk-ps2   | -0.35402 | 3.453442 | -3.04985 | 0.008997 | 0.106966 | -2.6597  |
| Atp9b     | -0.35417 | 5.251299 | -2.76611 | 0.015624 | 0.138772 | -3.17449 |
| Arg1      | -0.35432 | 3.994717 | -3.8816  | 0.001781 | 0.050272 | -1.12903 |
| Cyp2j9    | -0.35438 | 4.330622 | -2.70324 | 0.017644 | 0.14745  | -3.2871  |
| Apobec1   | -0.35439 | 6.498586 | -3.55235 | 0.003373 | 0.06681  | -1.73463 |
| Mcidas    | -0.35442 | 3.63936  | -4.17696 | 0.001012 | 0.039168 | -0.5912  |
| Gm9731    | -0.35445 | 3.75108  | -2.86368 | 0.01293  | 0.126105 | -2.99856 |
| Prap1     | -0.35609 | 3.725518 | -5.21777 | 0.000149 | 0.017742 | 1.227901 |
| Angpt4    | -0.35613 | 4.195633 | -3.00477 | 0.009824 | 0.111521 | -2.74207 |
| 2310022BC | -0.35742 | 8.275065 | -3.00755 | 0.009771 | 0.11113  | -2.73699 |
| Cym       | -0.35776 | 4.399407 | -4.15173 | 0.001061 | 0.039677 | -0.63686 |
| Nanos1    | -0.3578  | 3.98744  | -5.0985  | 0.000184 | 0.01936  | 1.02684  |
| Bri3      | -0.35781 | 4.251433 | -2.38921 | 0.032166 | 0.197348 | -3.83788 |
| Sec22b    | -0.35788 | 6.238376 | -2.34339 | 0.03507  | 0.205001 | -3.91626 |
| Nebi      | -0.35828 | 9.967346 | -2.92825 | 0.011404 | 0.119145 | -2.88145 |
| Kansl1    | -0.35837 | 7.178399 | -3.40345 | 0.004509 | 0.07686  | -2.00934 |
| Msx1os    | -0.35859 | 3.975164 | -3.86357 | 0.001845 | 0.05095  | -1.16206 |
| Ppargc1a  | -0.35982 | 9.841573 | -3.51067 | 0.003658 | 0.069102 | -1.8115  |
| B3gnt5    | -0.35986 | 3.700521 | -4.26931 | 0.000849 | 0.036266 | -0.42457 |
| Farsa     | -0.36018 | 5.046146 | -2.24371 | 0.042268 | 0.224621 | -4.08464 |
| Gm15527   | -0.36038 | 3.750393 | -2.65312 | 0.019434 | 0.154832 | -3.37637 |
| Fgf4      | -0.36058 | 3.988898 | -2.36071 | 0.033944 | 0.202007 | -3.8867  |
| Gm13271   | -0.3609  | 4.662325 | -4.08413 | 0.001208 | 0.041464 | -0.75948 |
| Gm12238   | -0.36108 | 4.660929 | -2.37921 | 0.03278  | 0.198877 | -3.85504 |
| Dguok     | -0.36121 | 6.25706  | -3.65413 | 0.002767 | 0.061599 | -1.54698 |
| Cdon      | -0.36141 | 4.044391 | -2.89817 | 0.012091 | 0.121451 | -2.93606 |
| Limk2     | -0.36194 | 4.841164 | -2.65771 | 0.019263 | 0.154199 | -3.36822 |
| Nip7      | -0.36196 | 5.992198 | -4.94461 | 0.000243 | 0.022522 | 0.764338 |
| Selt      | -0.36233 | 8.666816 | -2.34006 | 0.03529  | 0.205509 | -3.92193 |
| Kcp       | -0.36235 | 4.323873 | -4.10389 | 0.001163 | 0.040865 | -0.72361 |
| Fam83c    | -0.36264 | 3.816566 | -5.92141 | 4.40E-05 | 0.012162 | 2.369576 |
| Commd8    | -0.36275 | 5.736922 | -2.20665 | 0.045283 | 0.231348 | -4.14646 |
| 1500035N2 | -0.36305 | 3.848831 | -4.76498 | 0.000337 | 0.025389 | 0.453731 |
| Lrrc14b   | -0.36309 | 7.952894 | -2.88258 | 0.012464 | 0.123543 | -2.96433 |
| Decr1     | -0.3631  | 10.24423 | -3.09957 | 0.008165 | 0.102306 | -2.56865 |
| Tmpo      | -0.36338 | 5.890578 | -3.27342 | 0.005813 | 0.086535 | -2.2491  |
| Wsb2      | -0.36365 | 7.79441  | -2.17229 | 0.048258 | 0.239104 | -4.20335 |
| Prkag3    | -0.36375 | 4.356047 | -2.90305 | 0.011977 | 0.121077 | -2.92721 |
| Olf354    | -0.36377 | 3.983887 | -3.12709 | 0.007737 | 0.098854 | -2.51818 |
| Gpr3      | -0.36379 | 4.201408 | -3.14131 | 0.007525 | 0.097851 | -2.49207 |
| Gng2      | -0.36391 | 5.125176 | -2.47135 | 0.027526 | 0.18346  | -3.69598 |

|           |          |          |          |          |          |          |
|-----------|----------|----------|----------|----------|----------|----------|
| Gsdmcl1   | -0.36396 | 4.482736 | -3.65744 | 0.002749 | 0.061574 | -1.5409  |
| Bpifb9a   | -0.364   | 3.755502 | -3.78517 | 0.002146 | 0.054522 | -1.30592 |
| Tmed4     | -0.36404 | 9.360948 | -2.19284 | 0.046458 | 0.234743 | -4.16937 |
| Olf1505   | -0.36407 | 5.134369 | -2.42403 | 0.030114 | 0.19235  | -3.77793 |
| Pcdh7     | -0.36434 | 9.030396 | -2.76673 | 0.015606 | 0.138772 | -3.17337 |
| Srpk2     | -0.36436 | 8.292755 | -2.20485 | 0.045435 | 0.231794 | -4.14945 |
| Strbp     | -0.36437 | 4.80935  | -3.33773 | 0.005127 | 0.081593 | -2.13056 |
| Mrpl34    | -0.36442 | 7.964437 | -2.15948 | 0.049413 | 0.241671 | -4.22446 |
| Ppp2r1a   | -0.36446 | 10.37994 | -2.52901 | 0.02466  | 0.173815 | -3.59537 |
| Hiat1     | -0.36469 | 6.736115 | -2.39724 | 0.031682 | 0.196427 | -3.82408 |
| Osbpl8    | -0.36475 | 9.024658 | -3.14859 | 0.007419 | 0.097228 | -2.4787  |
| A330032B1 | -0.36477 | 4.333566 | -3.17981 | 0.00698  | 0.09438  | -2.42135 |
| Tfeb      | -0.36533 | 4.787876 | -4.01155 | 0.001388 | 0.044033 | -0.89157 |
| Lmo2      | -0.36536 | 6.187439 | -2.78145 | 0.015167 | 0.137442 | -3.14693 |
| Tpcn2     | -0.36707 | 5.182841 | -2.21501 | 0.044586 | 0.229533 | -4.13256 |
| Wipf2     | -0.36725 | 5.234344 | -2.79193 | 0.014862 | 0.135986 | -3.12807 |
| H3f3b     | -0.36789 | 4.59828  | -2.49763 | 0.026182 | 0.179011 | -3.65021 |
| Lim2      | -0.36821 | 4.073546 | -3.28385 | 0.005696 | 0.08565  | -2.22988 |
| Casp16    | -0.36877 | 4.392275 | -2.35839 | 0.034093 | 0.202327 | -3.89066 |
| Cdkl5     | -0.36888 | 4.860318 | -3.74322 | 0.002328 | 0.056789 | -1.38301 |
| Trib1     | -0.36909 | 6.464383 | -2.37908 | 0.032788 | 0.198877 | -3.85526 |
| Urm1      | -0.36932 | 4.761305 | -2.23053 | 0.043318 | 0.227433 | -4.10669 |
| Heatr5b   | -0.36938 | 7.486043 | -3.4469  | 0.004142 | 0.073769 | -1.92917 |
| 5730559C1 | -0.36941 | 4.271676 | -3.19618 | 0.00676  | 0.092954 | -2.39126 |
| Lrp4      | -0.36945 | 4.80209  | -3.54942 | 0.003392 | 0.066964 | -1.74002 |
| Ttc30b    | -0.36965 | 4.563875 | -2.79022 | 0.014911 | 0.136337 | -3.13114 |
| Bdh2      | -0.36986 | 3.978155 | -4.12093 | 0.001126 | 0.040206 | -0.69268 |
| 4930456L1 | -0.36994 | 3.856532 | -3.39102 | 0.00462  | 0.077654 | -2.03228 |
| Ap2b1     | -0.36995 | 6.976973 | -2.63954 | 0.019949 | 0.156691 | -3.40049 |
| Tprgl     | -0.37009 | 7.851902 | -2.2834  | 0.039249 | 0.216156 | -4.01796 |
| Net1      | -0.3704  | 5.593123 | -2.88975 | 0.012291 | 0.122369 | -2.95133 |
| Slc29a4   | -0.37045 | 4.37646  | -3.63942 | 0.002847 | 0.062253 | -1.57409 |
| Fam43b    | -0.37059 | 4.495044 | -3.25351 | 0.006044 | 0.088018 | -2.28576 |
| Smo       | -0.37067 | 6.251187 | -2.50483 | 0.025825 | 0.177499 | -3.63766 |
| Epb4.1l4a | -0.37068 | 4.670617 | -2.44262 | 0.029071 | 0.189011 | -3.7458  |
| Fads2     | -0.37093 | 4.927816 | -4.71944 | 0.000366 | 0.026537 | 0.37429  |
| Nog       | -0.37108 | 3.836838 | -3.79163 | 0.00212  | 0.05449  | -1.29405 |
| Lrfr2     | -0.37232 | 3.826128 | -4.68467 | 0.00039  | 0.027042 | 0.313454 |
| Ntpcr     | -0.3725  | 4.434518 | -2.65055 | 0.019531 | 0.155006 | -3.38094 |
| Gm15736   | -0.37258 | 4.02546  | -3.0316  | 0.009323 | 0.108813 | -2.69305 |
| Ier3      | -0.37261 | 8.866428 | -3.26094 | 0.005957 | 0.087566 | -2.27208 |
| Alpl      | -0.37263 | 6.570845 | -2.27996 | 0.039502 | 0.21688  | -4.02376 |
| Rims4     | -0.37278 | 3.891491 | -3.16541 | 0.007179 | 0.095407 | -2.44781 |
| Rfx1      | -0.37298 | 5.15726  | -2.3957  | 0.031774 | 0.196662 | -3.82674 |
| Pink1     | -0.37326 | 10.35048 | -2.15797 | 0.049551 | 0.242108 | -4.22695 |
| Pycard    | -0.37335 | 4.899751 | -2.49283 | 0.026423 | 0.179495 | -3.65858 |
| Aatk      | -0.37355 | 4.356683 | -4.86272 | 0.000282 | 0.023971 | 0.623288 |
| Atp5c1    | -0.37385 | 6.077233 | -2.73524 | 0.016586 | 0.143273 | -3.22987 |

|            |          |          |          |          |          |          |
|------------|----------|----------|----------|----------|----------|----------|
| Stt3b      | -0.37438 | 8.390937 | -2.55145 | 0.023624 | 0.170478 | -3.55602 |
| Syt6       | -0.3745  | 4.137943 | -5.35251 | 0.000117 | 0.016075 | 1.452487 |
| E130012A1  | -0.37459 | 4.389038 | -3.89729 | 0.001728 | 0.049617 | -1.10029 |
| Ccdc33     | -0.37488 | 3.596414 | -5.05154 | 0.0002   | 0.020075 | 0.947099 |
| Gm9866     | -0.37494 | 3.647247 | -5.04892 | 0.000201 | 0.020075 | 0.942642 |
| Gm4971     | -0.37498 | 4.137216 | -2.80595 | 0.014464 | 0.13377  | -3.10281 |
| Tmx1       | -0.37505 | 8.462863 | -4.37616 | 0.000694 | 0.033048 | -0.23284 |
| Kcnh2      | -0.37537 | 6.83217  | -2.66143 | 0.019126 | 0.153775 | -3.36161 |
| Cartpt     | -0.37538 | 3.69073  | -5.43902 | 0.000101 | 0.015433 | 1.595211 |
| Dalrd3     | -0.37553 | 6.389384 | -3.03935 | 0.009183 | 0.108196 | -2.67889 |
| Slc35a5    | -0.37575 | 4.78657  | -4.09296 | 0.001187 | 0.041181 | -0.74345 |
| Rnf186     | -0.37583 | 4.27172  | -3.05044 | 0.008987 | 0.106956 | -2.65862 |
| 5730409E0  | -0.37645 | 4.705655 | -3.03562 | 0.00925  | 0.108326 | -2.68571 |
| Ttc39b     | -0.37695 | 5.160811 | -2.82529 | 0.013931 | 0.13171  | -3.06794 |
| A230065H:  | -0.37759 | 4.262051 | -2.58218 | 0.022273 | 0.165337 | -3.50194 |
| 8430419KC  | -0.37777 | 4.133379 | -2.611   | 0.021075 | 0.161233 | -3.45106 |
| Rexo4      | -0.37798 | 4.801568 | -2.94351 | 0.01107  | 0.117357 | -2.8537  |
| Gm5346     | -0.37809 | 3.532227 | -3.29133 | 0.005613 | 0.085139 | -2.21609 |
| Eif3f      | -0.37837 | 8.478132 | -3.6326  | 0.002885 | 0.062351 | -1.58666 |
| Rd3        | -0.37864 | 4.366994 | -4.25708 | 0.000869 | 0.036925 | -0.44658 |
| Otos       | -0.37897 | 3.954885 | -4.66305 | 0.000406 | 0.027213 | 0.275553 |
| Perm1      | -0.37904 | 9.329685 | -2.29641 | 0.038305 | 0.213079 | -3.996   |
| Zfp566     | -0.37952 | 4.301614 | -2.52288 | 0.02495  | 0.174974 | -3.6061  |
| Clcn4-2    | -0.37954 | 7.509125 | -4.3695  | 0.000703 | 0.033174 | -0.24476 |
| Ppbp       | -0.37998 | 3.883007 | -2.77484 | 0.015363 | 0.138056 | -3.15882 |
| Dsg1a      | -0.38032 | 4.121199 | -4.01638 | 0.001375 | 0.043852 | -0.88278 |
| Trappc13   | -0.38043 | 6.281793 | -3.43507 | 0.004239 | 0.074637 | -1.95101 |
| Gsn        | -0.38059 | 11.49883 | -3.64958 | 0.002792 | 0.061834 | -1.55537 |
| Olfr667    | -0.38135 | 3.509684 | -3.72129 | 0.002429 | 0.057506 | -1.42335 |
| Vgll2      | -0.38156 | 3.775774 | -4.71372 | 0.00037  | 0.026586 | 0.364289 |
| Gm15341    | -0.38171 | 4.23151  | -3.19087 | 0.006831 | 0.093296 | -2.40101 |
| Zfp783     | -0.38197 | 4.24261  | -3.21524 | 0.006513 | 0.091193 | -2.35621 |
| Zc3h15     | -0.38198 | 4.450611 | -2.8384  | 0.013581 | 0.129906 | -3.04428 |
| D6Ert474c  | -0.3822  | 4.194643 | -4.56078 | 0.000491 | 0.029103 | 0.095446 |
| Krtap5-5   | -0.38258 | 3.937049 | -3.2431  | 0.006168 | 0.088633 | -2.30493 |
| Tff2       | -0.38269 | 3.697003 | -4.3836  | 0.000684 | 0.033    | -0.21953 |
| S100g      | -0.38281 | 3.586755 | -5.07419 | 0.000192 | 0.019641 | 0.985586 |
| LOC102638  | -0.38283 | 7.773593 | -2.95236 | 0.010881 | 0.116242 | -2.83759 |
| 4930556N1  | -0.38284 | 4.092109 | -3.04164 | 0.009142 | 0.108038 | -2.6747  |
| Rps2       | -0.38315 | 5.064772 | -2.4939  | 0.026369 | 0.179351 | -3.65672 |
| BC052040   | -0.38328 | 4.412526 | -2.82975 | 0.013811 | 0.131296 | -3.05989 |
| Slc19a1    | -0.38367 | 4.095925 | -3.09533 | 0.008233 | 0.102741 | -2.57641 |
| Gm38457    | -0.38382 | 3.908023 | -4.44895 | 0.000605 | 0.031585 | -0.10293 |
| Cacnb2     | -0.38407 | 9.224955 | -2.66938 | 0.018835 | 0.152672 | -3.34747 |
| Kcnn4      | -0.38429 | 3.906325 | -3.92198 | 0.001648 | 0.048299 | -1.05512 |
| Hnrnpa0    | -0.38455 | 6.589627 | -3.46727 | 0.003981 | 0.071977 | -1.89158 |
| ldh2       | -0.38456 | 12.29274 | -2.74558 | 0.016258 | 0.141863 | -3.21133 |
| St6galnac1 | -0.38478 | 3.706212 | -2.38718 | 0.03229  | 0.197762 | -3.84137 |



|           |          |          |          |          |          |          |
|-----------|----------|----------|----------|----------|----------|----------|
| Samd4     | -0.38481 | 7.449036 | -3.39338 | 0.004599 | 0.077427 | -2.02791 |
| Fam53b    | -0.38497 | 5.447489 | -3.47488 | 0.003922 | 0.071541 | -1.87754 |
| Gm10778   | -0.38502 | 5.008338 | -2.93729 | 0.011205 | 0.118032 | -2.86501 |
| Gm5528    | -0.38538 | 5.817403 | -2.20021 | 0.045827 | 0.233121 | -4.15715 |
| 4930480K2 | -0.38553 | 4.316839 | -2.60559 | 0.021295 | 0.162042 | -3.46062 |
| Chst12    | -0.38557 | 4.721441 | -2.28715 | 0.038975 | 0.21517  | -4.01164 |
| Fam170b   | -0.38564 | 4.516815 | -4.39573 | 0.000669 | 0.033    | -0.19786 |
| Rac3      | -0.3862  | 5.744564 | -4.10019 | 0.001171 | 0.041052 | -0.73033 |
| Slnl1     | -0.38634 | 3.862576 | -3.53682 | 0.003476 | 0.067579 | -1.76327 |
| Dnl       | -0.38672 | 5.213542 | -2.9473  | 0.010989 | 0.116796 | -2.84681 |
| Ogt       | -0.38677 | 9.133111 | -3.92095 | 0.001651 | 0.048299 | -1.05699 |
| Fuk       | -0.38681 | 4.76688  | -3.8372  | 0.001941 | 0.051921 | -1.2104  |
| Olml1     | -0.38683 | 4.346788 | -4.22884 | 0.000917 | 0.037606 | -0.49749 |
| LOC102635 | -0.387   | 3.885927 | -2.53646 | 0.024311 | 0.17274  | -3.58232 |
| Nkx6-1    | -0.38714 | 4.622186 | -4.22371 | 0.000926 | 0.037622 | -0.50675 |
| Ppp1r14d  | -0.38721 | 4.370521 | -3.33827 | 0.005121 | 0.081593 | -2.12956 |
| Zbtb6     | -0.38741 | 5.308085 | -4.34858 | 0.000731 | 0.03367  | -0.28221 |
| Tulp1     | -0.38796 | 4.172395 | -4.69312 | 0.000384 | 0.027042 | 0.328247 |
| Pou3f3    | -0.38846 | 3.962021 | -3.94239 | 0.001585 | 0.04735  | -1.0178  |
| Cgn       | -0.38891 | 4.76876  | -2.61488 | 0.020918 | 0.160601 | -3.44419 |
| Gm6155    | -0.3894  | 5.185021 | -2.21892 | 0.044263 | 0.229126 | -4.12604 |
| Gm8273    | -0.38958 | 4.639681 | -2.41533 | 0.030615 | 0.193859 | -3.79294 |
| Gm3086    | -0.38992 | 4.354843 | -3.00489 | 0.009822 | 0.111521 | -2.74185 |
| Atp6v1e2  | -0.38995 | 3.889821 | -2.81649 | 0.014171 | 0.1329   | -3.08383 |
| Prps2     | -0.39001 | 4.936178 | -3.27899 | 0.00575  | 0.086188 | -2.23883 |
| Pwwp2a    | -0.39017 | 4.712141 | -3.33489 | 0.005155 | 0.081722 | -2.1358  |
| Tmem167   | -0.39022 | 3.869341 | -2.90878 | 0.011844 | 0.120438 | -2.91681 |
| Gm16049   | -0.39036 | 4.266084 | -2.35493 | 0.034316 | 0.202875 | -3.89656 |
| Serpnb9   | -0.39064 | 5.228183 | -2.3954  | 0.031792 | 0.196662 | -3.82724 |
| Gm10100   | -0.39072 | 3.798862 | -4.30225 | 0.000798 | 0.034854 | -0.36533 |
| Ankrd1    | -0.39087 | 12.70268 | -2.57618 | 0.022531 | 0.166143 | -3.51252 |
| Bcl7b     | -0.39094 | 7.586755 | -3.03653 | 0.009234 | 0.108326 | -2.68405 |
| Dhrs7     | -0.39119 | 6.044966 | -3.72341 | 0.002419 | 0.057456 | -1.41945 |
| Recql     | -0.39129 | 4.983229 | -3.57949 | 0.003199 | 0.065756 | -1.68456 |
| Aire      | -0.39142 | 4.617279 | -2.45804 | 0.028232 | 0.186301 | -3.71908 |
| Rfwd2     | -0.39157 | 9.015154 | -2.33922 | 0.035347 | 0.205554 | -3.92337 |
| Ahnak2    | -0.39168 | 5.669234 | -2.23614 | 0.042868 | 0.226647 | -4.0973  |
| Pik3r6    | -0.39206 | 5.452243 | -2.1626  | 0.049129 | 0.241041 | -4.21933 |
| Olfr282   | -0.39259 | 4.071445 | -4.69156 | 0.000385 | 0.027042 | 0.325516 |
| 1700028J1 | -0.39286 | 4.619978 | -3.45932 | 0.004043 | 0.07268  | -1.90626 |
| Gm16159   | -0.3929  | 4.104658 | -3.18895 | 0.006856 | 0.093296 | -2.40455 |
| F420014N2 | -0.39359 | 4.522283 | -3.15206 | 0.007369 | 0.096938 | -2.47234 |
| Igkv2-112 | -0.3938  | 3.804157 | -2.40912 | 0.030977 | 0.194862 | -3.80364 |
| Kcnj14    | -0.39424 | 3.953678 | -2.7863  | 0.015025 | 0.136824 | -3.13821 |
| Nxn12     | -0.39426 | 3.896703 | -3.63254 | 0.002886 | 0.062351 | -1.58677 |
| Gm12707   | -0.39429 | 4.252074 | -2.27975 | 0.039518 | 0.216919 | -4.02412 |
| Lrrc51    | -0.39454 | 5.237135 | -2.17002 | 0.048461 | 0.2397   | -4.2071  |
| Nt5c1a    | -0.39469 | 6.661055 | -2.85185 | 0.013231 | 0.127934 | -3.01997 |

|           |          |          |          |          |          |          |
|-----------|----------|----------|----------|----------|----------|----------|
| 1110004E0 | -0.39502 | 5.103271 | -3.71434 | 0.002462 | 0.057893 | -1.43614 |
| Ankrd33b  | -0.39522 | 5.755351 | -2.47615 | 0.027276 | 0.182517 | -3.68763 |
| Gm16537   | -0.39531 | 4.717219 | -4.50805 | 0.000542 | 0.030405 | 0.002089 |
| Izumo1r   | -0.39582 | 4.042163 | -4.129   | 0.001108 | 0.039942 | -0.67805 |
| Grb2      | -0.39591 | 6.257938 | -2.66202 | 0.019104 | 0.15365  | -3.36056 |
| Psmc9     | -0.396   | 5.329508 | -4.47658 | 0.000575 | 0.031266 | -0.05378 |
| 3110009F2 | -0.39607 | 3.67729  | -3.70781 | 0.002493 | 0.058217 | -1.44815 |
| Irx5      | -0.39622 | 5.443329 | -2.38549 | 0.032393 | 0.197862 | -3.84427 |
| Mecom     | -0.39629 | 5.303972 | -4.11457 | 0.001139 | 0.040407 | -0.70422 |
| Tm4sf5    | -0.39636 | 3.926497 | -4.16604 | 0.001033 | 0.039457 | -0.61095 |
| Gm32125   | -0.39648 | 3.708254 | -2.36974 | 0.033371 | 0.200485 | -3.87126 |
| Kcnq3     | -0.39657 | 3.6606   | -5.21925 | 0.000148 | 0.017742 | 1.230391 |
| Pacsin3   | -0.39671 | 5.594289 | -2.85961 | 0.013033 | 0.126808 | -3.00593 |
| Tnfrsf25  | -0.39671 | 4.566945 | -3.40361 | 0.004508 | 0.07686  | -2.00904 |
| LOC675947 | -0.39708 | 3.745712 | -4.43243 | 0.000624 | 0.0322   | -0.13237 |
| Foxf1     | -0.39774 | 4.510927 | -3.17922 | 0.006988 | 0.09438  | -2.42244 |
| Scrt2     | -0.39797 | 3.966215 | -4.96044 | 0.000236 | 0.022031 | 0.791485 |
| Mir346    | -0.39821 | 4.222119 | -2.22131 | 0.044068 | 0.228826 | -4.12207 |
| Trim55    | -0.3984  | 7.850281 | -2.16636 | 0.04879  | 0.240187 | -4.21314 |
| Col26a1   | -0.39867 | 4.466517 | -3.83878 | 0.001935 | 0.051921 | -1.20751 |
| Jmjd6     | -0.39886 | 6.375441 | -2.65303 | 0.019438 | 0.154832 | -3.37654 |
| Rps6kb1   | -0.39899 | 6.170783 | -2.77707 | 0.015296 | 0.137678 | -3.1548  |
| Ntsr2     | -0.39918 | 6.358676 | -3.29494 | 0.005574 | 0.084885 | -2.20944 |
| Cd82      | -0.39956 | 5.130788 | -3.20344 | 0.006665 | 0.092328 | -2.37791 |
| Ppp1r14a  | -0.39972 | 5.000824 | -2.4389  | 0.029277 | 0.189688 | -3.75225 |
| Gm3636    | -0.39989 | 3.868091 | -4.60214 | 0.000455 | 0.028131 | 0.168449 |
| Fnip2     | -0.39994 | 6.391825 | -2.39654 | 0.031724 | 0.196573 | -3.82529 |
| Asph      | -0.4003  | 7.704149 | -3.01289 | 0.00967  | 0.110879 | -2.72723 |
| Ydjc      | -0.4003  | 4.099002 | -3.61848 | 0.002965 | 0.062847 | -1.61267 |
| Gm2102    | -0.40037 | 4.800791 | -2.64782 | 0.019634 | 0.155454 | -3.38579 |
| Fem1a     | -0.4011  | 5.967746 | -2.64556 | 0.01972  | 0.155826 | -3.38981 |
| Gm3878    | -0.40199 | 4.836928 | -2.3998  | 0.031528 | 0.196396 | -3.81968 |
| Emc8      | -0.40202 | 6.467936 | -3.61262 | 0.002999 | 0.063192 | -1.62349 |
| Surf2     | -0.40222 | 7.55426  | -3.93773 | 0.001599 | 0.04755  | -1.02632 |
| Msrb3     | -0.4024  | 9.307265 | -2.61312 | 0.020989 | 0.160945 | -3.4473  |
| Phactr3   | -0.40257 | 4.327686 | -3.16532 | 0.00718  | 0.095407 | -2.44798 |
| Wbp4      | -0.40275 | 5.882935 | -2.92089 | 0.011568 | 0.11988  | -2.89482 |
| Prkcz     | -0.40311 | 4.080836 | -3.00792 | 0.009764 | 0.11113  | -2.73631 |
| Ighv9-4   | -0.40355 | 4.622282 | -2.37516 | 0.033031 | 0.199443 | -3.86197 |
| Cldn1     | -0.40366 | 3.696203 | -4.99314 | 0.000222 | 0.021397 | 0.847484 |
| Gpatch2l  | -0.40391 | 4.998566 | -3.31627 | 0.005346 | 0.083341 | -2.17014 |
| Xirp2     | -0.40428 | 10.33269 | -4.38275 | 0.000685 | 0.033    | -0.22105 |
| Peg12     | -0.40443 | 4.596451 | -2.25914 | 0.041069 | 0.22123  | -4.05878 |
| Lrrc10    | -0.40465 | 9.768053 | -4.02701 | 0.001347 | 0.043604 | -0.86339 |
| A430108G  | -0.40466 | 4.113264 | -4.33097 | 0.000756 | 0.034093 | -0.31378 |
| E130018N1 | -0.40479 | 4.04598  | -3.32723 | 0.005233 | 0.082544 | -2.14992 |
| Mir3110   | -0.40502 | 5.327111 | -2.84536 | 0.013399 | 0.128904 | -3.03169 |
| Tcte2     | -0.40503 | 4.741169 | -3.63166 | 0.00289  | 0.062376 | -1.58839 |

|            |          |          |          |          |          |          |
|------------|----------|----------|----------|----------|----------|----------|
| Olf1122    | -0.4053  | 3.675361 | -4.11118 | 0.001147 | 0.040554 | -0.71038 |
| Sorbs2     | -0.40533 | 9.801242 | -2.87642 | 0.012614 | 0.124572 | -2.97549 |
| Cactin     | -0.40533 | 5.049611 | -3.65439 | 0.002766 | 0.061599 | -1.54652 |
| Fbxo30     | -0.40539 | 6.573836 | -5.25191 | 0.00014  | 0.017535 | 1.285065 |
| Trp53bp2   | -0.40578 | 6.514069 | -3.65895 | 0.002741 | 0.061504 | -1.53812 |
| Rab11fip4c | -0.40591 | 3.861091 | -3.53028 | 0.003521 | 0.067905 | -1.77532 |
| Cnn3       | -0.40643 | 7.99568  | -2.89983 | 0.012053 | 0.121279 | -2.93306 |
| Olf1298    | -0.40662 | 3.700011 | -3.06155 | 0.008794 | 0.106175 | -2.63829 |
| Ero1l      | -0.40665 | 7.068322 | -3.59456 | 0.003107 | 0.064522 | -1.65678 |
| Gm12596    | -0.40669 | 3.878523 | -4.15103 | 0.001063 | 0.039677 | -0.63812 |
| Mxi1       | -0.40672 | 7.346934 | -4.07991 | 0.001217 | 0.041571 | -0.76715 |
| Stard6     | -0.40682 | 3.513304 | -2.85332 | 0.013193 | 0.12771  | -3.0173  |
| Ucn        | -0.4069  | 4.580894 | -5.15634 | 0.000166 | 0.018582 | 1.124607 |
| Al606473   | -0.4069  | 3.781248 | -4.38129 | 0.000687 | 0.033    | -0.22367 |
| Foxn4      | -0.4071  | 4.081606 | -4.50169 | 0.000548 | 0.030412 | -0.00919 |
| 1110017D1  | -0.40735 | 4.05121  | -4.09136 | 0.001191 | 0.041181 | -0.74636 |
| Klhdc4     | -0.40771 | 4.661869 | -2.95248 | 0.010878 | 0.116242 | -2.83738 |
| Serpinf1   | -0.40799 | 7.777452 | -2.4852  | 0.02681  | 0.181067 | -3.67188 |
| 2610021AC  | -0.4082  | 5.461429 | -2.26946 | 0.040286 | 0.219147 | -4.04145 |
| Zfp382     | -0.40821 | 4.15006  | -3.4509  | 0.00411  | 0.073301 | -1.9218  |
| Chrna4     | -0.40875 | 3.984914 | -3.12836 | 0.007718 | 0.098798 | -2.51585 |
| Eef2kmt    | -0.4088  | 6.723334 | -2.32258 | 0.036469 | 0.208563 | -3.95165 |
| Ccdc117    | -0.40883 | 6.59002  | -2.31019 | 0.037328 | 0.21095  | -3.97268 |
| Hs3st3b1   | -0.40922 | 4.453595 | -2.92052 | 0.011577 | 0.11989  | -2.8955  |
| Ftsj2      | -0.40923 | 5.205051 | -2.77938 | 0.015228 | 0.137661 | -3.15064 |
| Rasl11b    | -0.40939 | 7.341203 | -3.2764  | 0.005779 | 0.086342 | -2.2436  |
| Zfp94      | -0.40959 | 4.167274 | -3.27853 | 0.005755 | 0.086188 | -2.23968 |
| Peli3      | -0.40987 | 4.361472 | -3.72223 | 0.002424 | 0.057456 | -1.42162 |
| C3ar1      | -0.41022 | 4.798469 | -2.86525 | 0.012891 | 0.125999 | -2.99572 |
| Syng1      | -0.41062 | 4.506276 | -2.51789 | 0.025189 | 0.175556 | -3.61484 |
| Cav3       | -0.41066 | 6.56778  | -2.20236 | 0.045645 | 0.232482 | -4.15359 |
| Stoml1     | -0.41073 | 4.326213 | -4.49999 | 0.00055  | 0.030412 | -0.01221 |
| Gdap1l1    | -0.41138 | 4.144407 | -3.89398 | 0.001739 | 0.049762 | -1.10636 |
| Al646519   | -0.41178 | 4.606771 | -4.05325 | 0.001281 | 0.042624 | -0.81563 |
| Ccdc149    | -0.41184 | 4.854626 | -2.8931  | 0.012211 | 0.121966 | -2.94527 |
| Spesp1     | -0.41239 | 4.894392 | -3.54871 | 0.003397 | 0.066966 | -1.74134 |
| Serp1nb6a  | -0.4127  | 5.432322 | -2.70526 | 0.017575 | 0.147342 | -3.28348 |
| Gm13530    | -0.41271 | 4.017276 | -5.5575  | 8.18E-05 | 0.014851 | 1.788819 |
| Gnb2l1     | -0.41299 | 9.525275 | -2.29237 | 0.038595 | 0.214075 | -4.00282 |
| Fgfbp3     | -0.41393 | 5.104068 | -2.68601 | 0.018241 | 0.150104 | -3.31783 |
| Nenf       | -0.41425 | 7.225328 | -3.49228 | 0.003792 | 0.07031  | -1.84544 |
| Fgf13      | -0.41446 | 6.726851 | -2.78823 | 0.014969 | 0.136413 | -3.13473 |
| Gm4553     | -0.41451 | 3.774107 | -2.82899 | 0.013831 | 0.131439 | -3.06126 |
| Fst        | -0.41453 | 4.019297 | -3.31164 | 0.005395 | 0.08365  | -2.17866 |
| Fam25c     | -0.41454 | 4.567471 | -2.56308 | 0.023104 | 0.168419 | -3.53558 |
| Lyz1       | -0.41456 | 3.733961 | -3.8528  | 0.001883 | 0.051557 | -1.1818  |
| Mthfsd     | -0.41476 | 5.104306 | -2.83401 | 0.013697 | 0.130565 | -3.05221 |
| Pn1sr      | -0.41479 | 7.79716  | -2.28582 | 0.039071 | 0.21556  | -4.01387 |

|           |          |          |          |          |          |          |
|-----------|----------|----------|----------|----------|----------|----------|
| Gm26644   | -0.41496 | 5.115924 | -2.2026  | 0.045625 | 0.232427 | -4.1532  |
| Lrrc4b    | -0.41505 | 5.464837 | -3.15518 | 0.007324 | 0.096594 | -2.46661 |
| Rpl23     | -0.41511 | 4.57353  | -3.30029 | 0.005516 | 0.08433  | -2.19958 |
| Mtfp1     | -0.4152  | 7.989665 | -2.21788 | 0.044349 | 0.229137 | -4.12777 |
| Dusp3     | -0.41524 | 7.145084 | -3.24221 | 0.006179 | 0.088736 | -2.30656 |
| Parm1     | -0.41543 | 9.712206 | -3.49232 | 0.003791 | 0.07031  | -1.84536 |
| Cela2a    | -0.41593 | 4.650597 | -4.77499 | 0.000331 | 0.025389 | 0.471143 |
| H2afy     | -0.41631 | 7.497087 | -2.75269 | 0.016036 | 0.140682 | -3.19859 |
| Ahctf1    | -0.41691 | 6.725464 | -3.24005 | 0.006205 | 0.088888 | -2.31054 |
| Mypopos   | -0.41692 | 4.513709 | -2.66614 | 0.018953 | 0.153364 | -3.35323 |
| A230103J1 | -0.41693 | 3.984082 | -2.78895 | 0.014948 | 0.136388 | -3.13344 |
| Ighv1-53  | -0.41693 | 3.93281  | -3.39602 | 0.004575 | 0.077423 | -2.02305 |
| Serp1     | -0.41697 | 6.105971 | -2.70196 | 0.017688 | 0.147742 | -3.28938 |
| Gast      | -0.41726 | 5.489936 | -2.75444 | 0.015982 | 0.140608 | -3.19545 |
| Cln1      | -0.41845 | 4.204347 | -3.60154 | 0.003065 | 0.064027 | -1.64391 |
| Srxn1     | -0.41863 | 5.961422 | -2.53467 | 0.024394 | 0.17274  | -3.58545 |
| Traj5     | -0.41942 | 3.680673 | -3.37115 | 0.004803 | 0.079016 | -2.06892 |
| Cenpa     | -0.41994 | 5.916334 | -2.90005 | 0.012047 | 0.121279 | -2.93266 |
| Usf2      | -0.42002 | 5.946242 | -2.91093 | 0.011795 | 0.120438 | -2.91291 |
| Kitl      | -0.4204  | 7.668379 | -3.27453 | 0.0058   | 0.086535 | -2.24704 |
| Fxyd6     | -0.42063 | 7.180308 | -3.0905  | 0.008311 | 0.103197 | -2.58526 |
| Col5a1    | -0.42097 | 5.446743 | -2.9031  | 0.011976 | 0.121077 | -2.92713 |
| Traj55    | -0.42107 | 4.191969 | -3.26497 | 0.00591  | 0.087244 | -2.26466 |
| Upk3b     | -0.42108 | 4.198637 | -3.61988 | 0.002957 | 0.062839 | -1.6101  |
| Nqo1      | -0.42129 | 8.587206 | -3.07492 | 0.008567 | 0.104714 | -2.61381 |
| Speer4a   | -0.42131 | 3.749959 | -4.13213 | 0.001102 | 0.03993  | -0.67237 |
| Ror2      | -0.42156 | 4.757317 | -2.62368 | 0.020567 | 0.159184 | -3.4286  |
| Zic5      | -0.4217  | 4.275803 | -3.25724 | 0.006    | 0.087839 | -2.27889 |
| Wfdc12    | -0.42172 | 3.634113 | -5.23478 | 0.000144 | 0.017592 | 1.256409 |
| Tube1     | -0.42186 | 4.056159 | -3.16935 | 0.007124 | 0.09532  | -2.44057 |
| Slc35a4   | -0.42205 | 4.194248 | -2.4882  | 0.026657 | 0.18047  | -3.66665 |
| Atf4      | -0.42225 | 6.901506 | -4.29176 | 0.000814 | 0.035366 | -0.38419 |
| Hk1       | -0.42225 | 8.216281 | -3.75565 | 0.002272 | 0.056155 | -1.36017 |
| Spry2     | -0.42244 | 5.382368 | -2.89049 | 0.012274 | 0.122292 | -2.95    |
| Tff3      | -0.42264 | 4.086366 | -2.39811 | 0.03163  | 0.196427 | -3.82259 |
| Lcn5      | -0.42301 | 3.982666 | -6.08823 | 3.33E-05 | 0.011546 | 2.628725 |
| Paqr9     | -0.42308 | 6.283742 | -2.7271  | 0.016849 | 0.144428 | -3.24443 |
| Gm19412   | -0.42338 | 4.597393 | -3.9879  | 0.001452 | 0.045198 | -0.93469 |
| Tspan18   | -0.42367 | 7.080648 | -3.24641 | 0.006128 | 0.088386 | -2.29882 |
| Myom2     | -0.42387 | 11.12628 | -3.4858  | 0.00384  | 0.070709 | -1.85739 |
| Sergef    | -0.42404 | 4.163144 | -4.6997  | 0.00038  | 0.027042 | 0.339779 |
| Scgb1b12  | -0.42421 | 4.380507 | -2.93908 | 0.011166 | 0.117771 | -2.86176 |
| Mme       | -0.42442 | 5.700877 | -2.28542 | 0.039101 | 0.215627 | -4.01455 |
| Rgs3      | -0.42461 | 6.060808 | -4.74753 | 0.000348 | 0.025802 | 0.423326 |
| Cyth2     | -0.42463 | 7.367764 | -2.22284 | 0.043942 | 0.228486 | -4.11951 |
| Tmed10    | -0.4249  | 9.304803 | -2.31135 | 0.037247 | 0.210682 | -3.97071 |
| Scarna3a  | -0.42494 | 4.774835 | -2.5253  | 0.024835 | 0.174633 | -3.60186 |
| Foxa2     | -0.42519 | 4.402476 | -4.04453 | 0.001303 | 0.042778 | -0.83149 |

|           |          |          |          |          |          |          |
|-----------|----------|----------|----------|----------|----------|----------|
| Map3k8    | -0.42593 | 4.966234 | -2.91536 | 0.011694 | 0.120141 | -2.90486 |
| Tubb2b    | -0.42595 | 3.791662 | -4.27515 | 0.00084  | 0.036053 | -0.41405 |
| Zfp710    | -0.4262  | 5.061639 | -2.99849 | 0.009945 | 0.112243 | -2.75352 |
| Sox14     | -0.42627 | 4.375409 | -3.85045 | 0.001892 | 0.051557 | -1.18611 |
| 943003810 | -0.42633 | 5.746307 | -2.32187 | 0.036518 | 0.208698 | -3.95286 |
| Acat2     | -0.42646 | 4.965481 | -2.94261 | 0.011089 | 0.117494 | -2.85533 |
| Fndc1     | -0.4265  | 4.864061 | -3.08663 | 0.008374 | 0.103565 | -2.59235 |
| Kcnmb1    | -0.42695 | 5.122789 | -5.19014 | 0.000156 | 0.01804  | 1.181516 |
| Efna1     | -0.42743 | 6.679677 | -2.95622 | 0.010799 | 0.115914 | -2.83058 |
| Uhrf1     | -0.42755 | 4.365651 | -4.22088 | 0.000931 | 0.037622 | -0.51185 |
| Krt81     | -0.42777 | 4.343408 | -3.94647 | 0.001572 | 0.04715  | -1.01034 |
| Tbc1d10b  | -0.42795 | 4.207087 | -2.76792 | 0.01557  | 0.138715 | -3.17125 |
| Tomm34    | -0.42823 | 6.551022 | -2.44435 | 0.028976 | 0.188767 | -3.74281 |
| Gm6557    | -0.42824 | 5.57722  | -2.17566 | 0.047959 | 0.238399 | -4.1978  |
| Bloc1s5   | -0.42858 | 5.20205  | -4.31031 | 0.000786 | 0.034664 | -0.35086 |
| Acta2     | -0.42891 | 9.52773  | -2.39145 | 0.032031 | 0.197148 | -3.83404 |
| Slc25a33  | -0.42952 | 6.206139 | -3.31826 | 0.005325 | 0.08316  | -2.16647 |
| Pstk      | -0.42952 | 6.734294 | -2.59053 | 0.02192  | 0.163948 | -3.48722 |
| Rimklb    | -0.42955 | 3.579498 | -4.50695 | 0.000543 | 0.030405 | 0.000141 |
| Oprd1     | -0.42995 | 4.09427  | -5.95486 | 4.16E-05 | 0.01211  | 2.421908 |
| Ttc17     | -0.4303  | 7.763041 | -4.13847 | 0.001089 | 0.039857 | -0.66089 |
| Slc12a7   | -0.43059 | 8.015825 | -2.22752 | 0.043562 | 0.227889 | -4.11171 |
| Gng12     | -0.43117 | 7.198639 | -3.82193 | 0.001999 | 0.052809 | -1.23842 |
| Suz12     | -0.4312  | 5.54498  | -2.83737 | 0.013608 | 0.130077 | -3.04614 |
| Olfr1193  | -0.43173 | 3.852819 | -3.8294  | 0.00197  | 0.05233  | -1.22471 |
| Coa5      | -0.43204 | 7.36829  | -3.27352 | 0.005812 | 0.086535 | -2.2489  |
| 1110038B1 | -0.43224 | 6.46894  | -3.5254  | 0.003555 | 0.068153 | -1.78433 |
| Adm       | -0.43288 | 4.819529 | -3.40069 | 0.004533 | 0.077193 | -2.01443 |
| LOC102639 | -0.43333 | 4.530567 | -4.3684  | 0.000704 | 0.033174 | -0.24672 |
| Reep1     | -0.43336 | 5.084103 | -3.36005 | 0.004908 | 0.079745 | -2.0894  |
| C530044C1 | -0.43366 | 3.826384 | -4.01253 | 0.001385 | 0.044029 | -0.88978 |
| Prss54    | -0.43381 | 4.281467 | -3.5467  | 0.00341  | 0.067035 | -1.74504 |
| Dusp10    | -0.4339  | 5.253591 | -2.80128 | 0.014595 | 0.134435 | -3.11124 |
| Pid1      | -0.43394 | 5.612132 | -2.83418 | 0.013693 | 0.130565 | -3.0519  |
| AW549542  | -0.43435 | 4.859975 | -3.56891 | 0.003266 | 0.066221 | -1.70408 |
| Cetn4     | -0.4344  | 4.423426 | -3.07843 | 0.008509 | 0.104434 | -2.60738 |
| Btbd18    | -0.43494 | 4.484843 | -3.796   | 0.002102 | 0.054401 | -1.28602 |
| Nccrp1    | -0.43506 | 4.388263 | -4.1837  | 0.000999 | 0.038881 | -0.57901 |
| Ighv1-15  | -0.43557 | 3.744943 | -5.94356 | 4.24E-05 | 0.01211  | 2.404255 |
| Rnf6      | -0.43563 | 5.348267 | -3.07867 | 0.008505 | 0.104434 | -2.60693 |
| Zbtb18    | -0.43606 | 4.994537 | -2.71163 | 0.017361 | 0.146649 | -3.27211 |
| Crybb3    | -0.43642 | 5.240285 | -3.41306 | 0.004425 | 0.076357 | -1.99162 |
| Mir383    | -0.43699 | 3.681327 | -5.45347 | 9.81E-05 | 0.015433 | 1.618943 |
| Pdzd2     | -0.43746 | 8.141296 | -4.82654 | 0.000301 | 0.024679 | 0.560671 |
| Nkain4    | -0.43767 | 4.261795 | -2.68176 | 0.018391 | 0.150643 | -3.32542 |
| Samd9l    | -0.43786 | 4.515606 | -3.18928 | 0.006852 | 0.093296 | -2.40394 |
| Gp9       | -0.4379  | 4.612595 | -3.75448 | 0.002278 | 0.056226 | -1.36231 |
| Zfp362    | -0.43801 | 6.573476 | -4.42943 | 0.000628 | 0.032315 | -0.13771 |

|           |          |          |          |          |          |          |
|-----------|----------|----------|----------|----------|----------|----------|
| Dyrk1a    | -0.43852 | 8.920715 | -2.21837 | 0.044309 | 0.229126 | -4.12696 |
| 1110002LO | -0.43881 | 5.011553 | -2.6045  | 0.021339 | 0.162083 | -3.46254 |
| Gm9899    | -0.43939 | 5.766147 | -2.78594 | 0.015036 | 0.136869 | -3.13885 |
| Olf411    | -0.43942 | 4.036636 | -3.21895 | 0.006466 | 0.090868 | -2.34938 |
| Klk13     | -0.43973 | 3.653749 | -4.67385 | 0.000398 | 0.027132 | 0.294487 |
| Alpl2     | -0.43985 | 3.65996  | -4.65993 | 0.000409 | 0.027213 | 0.270083 |
| Flcn      | -0.43991 | 7.437269 | -3.97858 | 0.001478 | 0.045559 | -0.9517  |
| Spata31d1 | -0.4402  | 4.18664  | -5.39664 | 0.000108 | 0.015832 | 1.525431 |
| Zfp395    | -0.44039 | 5.391296 | -2.66382 | 0.019038 | 0.153614 | -3.35735 |
| 4930453N2 | -0.44058 | 5.607185 | -2.45675 | 0.028301 | 0.186525 | -3.72133 |
| Mreg      | -0.4406  | 6.520423 | -2.7314  | 0.01671  | 0.143739 | -3.23674 |
| Nrg2      | -0.44102 | 4.548698 | -5.16853 | 0.000162 | 0.01849  | 1.145154 |
| Rtn4      | -0.4412  | 5.410099 | -3.7132  | 0.002467 | 0.057893 | -1.43823 |
| Hivep2    | -0.44143 | 5.659492 | -4.51735 | 0.000533 | 0.030368 | 0.018587 |
| Med19     | -0.44145 | 6.05385  | -3.62567 | 0.002924 | 0.062617 | -1.59943 |
| Gm15569   | -0.44195 | 4.451224 | -3.26806 | 0.005874 | 0.087081 | -2.25897 |
| Paqr7     | -0.44236 | 5.581553 | -2.20492 | 0.045429 | 0.231794 | -4.14934 |
| Cebpzos   | -0.44263 | 6.22465  | -2.52787 | 0.024713 | 0.174094 | -3.59736 |
| Timm22    | -0.44291 | 4.37539  | -4.22263 | 0.000928 | 0.037622 | -0.50868 |
| Canx      | -0.44294 | 10.94878 | -5.39355 | 0.000109 | 0.015832 | 1.520341 |
| Gm4604    | -0.44337 | 4.519852 | -5.90425 | 4.53E-05 | 0.012162 | 2.342677 |
| Ralgps1   | -0.44423 | 5.493544 | -4.21915 | 0.000934 | 0.037622 | -0.51497 |
| Knop1     | -0.44498 | 4.89144  | -3.46352 | 0.00401  | 0.072198 | -1.8985  |
| 1700095B1 | -0.445   | 6.422194 | -3.43111 | 0.004272 | 0.07495  | -1.95831 |
| Lrp8os2   | -0.44515 | 4.048747 | -4.21926 | 0.000934 | 0.037622 | -0.51477 |
| Blzf1     | -0.44524 | 5.207228 | -2.49999 | 0.026064 | 0.178551 | -3.6461  |
| 2810006K2 | -0.44551 | 4.704815 | -2.51172 | 0.025488 | 0.176497 | -3.62562 |
| 2310026I2 | -0.44604 | 3.751587 | -5.83667 | 5.07E-05 | 0.012368 | 2.236228 |
| 1500015O  | -0.44616 | 3.520817 | -3.91112 | 0.001683 | 0.04882  | -1.07498 |
| Syt11     | -0.44623 | 6.3345   | -2.20269 | 0.045617 | 0.232427 | -4.15304 |
| LOC10264  | -0.44632 | 7.365058 | -4.62303 | 0.000438 | 0.027669 | 0.205228 |
| Ncam1     | -0.44636 | 5.735965 | -2.28587 | 0.039068 | 0.21556  | -4.0138  |
| Fam101a   | -0.44675 | 4.249607 | -2.81217 | 0.01429  | 0.133251 | -3.09161 |
| lvns1abp  | -0.44678 | 11.7675  | -4.90472 | 0.000261 | 0.023269 | 0.695747 |
| Gm8692    | -0.44741 | 4.64397  | -3.84262 | 0.001921 | 0.051918 | -1.20047 |
| Creb3l3   | -0.44743 | 4.611733 | -5.48922 | 9.21E-05 | 0.015238 | 1.677512 |
| lpo7      | -0.44778 | 8.757555 | -2.73813 | 0.016494 | 0.142794 | -3.22468 |
| Mir194-2  | -0.44842 | 4.235753 | -2.89908 | 0.01207  | 0.121336 | -2.93442 |
| Ptprj     | -0.44865 | 6.091431 | -2.31224 | 0.037184 | 0.21051  | -3.9692  |
| Gm11529   | -0.44878 | 3.63816  | -5.27712 | 0.000134 | 0.017404 | 1.327159 |
| Rpa3      | -0.44918 | 4.980974 | -2.76263 | 0.01573  | 0.139362 | -3.18074 |
| Pcdhgc3   | -0.44943 | 4.624571 | -3.41152 | 0.004439 | 0.076357 | -1.99445 |
| Il10rb    | -0.44972 | 9.76277  | -3.46882 | 0.003969 | 0.071865 | -1.88873 |
| Snap47    | -0.4505  | 7.576019 | -2.81557 | 0.014196 | 0.132975 | -3.08547 |
| Ptprm     | -0.45059 | 9.004198 | -2.99506 | 0.010012 | 0.112245 | -2.75979 |
| Nsun2     | -0.45062 | 7.516066 | -2.24581 | 0.042103 | 0.224033 | -4.08113 |
| Cthrc1    | -0.45138 | 4.236711 | -4.56751 | 0.000485 | 0.029057 | 0.107348 |
| lqck      | -0.45144 | 3.848663 | -4.33808 | 0.000746 | 0.033946 | -0.30103 |

|           |          |          |          |          |          |          |
|-----------|----------|----------|----------|----------|----------|----------|
| Rabif     | -0.45159 | 6.950799 | -2.76663 | 0.015609 | 0.138772 | -3.17356 |
| Fsbp      | -0.4518  | 4.47462  | -2.80915 | 0.014374 | 0.133685 | -3.09705 |
| Gpr183    | -0.45211 | 4.169939 | -4.65479 | 0.000413 | 0.027213 | 0.261044 |
| Galnt2    | -0.45266 | 6.698636 | -2.43094 | 0.029722 | 0.191325 | -3.766   |
| E1300180C | -0.45292 | 4.520937 | -3.5543  | 0.00336  | 0.066677 | -1.73103 |
| Mir3091   | -0.45346 | 5.458327 | -3.77723 | 0.002179 | 0.054728 | -1.3205  |
| 1700001CC | -0.45368 | 3.934943 | -4.65274 | 0.000414 | 0.027213 | 0.257446 |
| Ube2q2    | -0.45372 | 6.047716 | -2.24099 | 0.042483 | 0.22534  | -4.08919 |
| Mif4gd    | -0.45393 | 5.299079 | -3.24037 | 0.006201 | 0.088888 | -2.30994 |
| Zfp39     | -0.45393 | 5.265059 | -3.87539 | 0.001803 | 0.05036  | -1.1404  |
| Mvd       | -0.45435 | 4.791216 | -2.96393 | 0.010638 | 0.114935 | -2.81653 |
| Trp53i13  | -0.45492 | 4.882239 | -3.72268 | 0.002422 | 0.057456 | -1.42079 |
| Ggn       | -0.45506 | 4.507331 | -3.73142 | 0.002382 | 0.057429 | -1.40472 |
| Rapgef6   | -0.4553  | 5.387912 | -5.66356 | 6.82E-05 | 0.01436  | 1.960249 |
| Rai1      | -0.45544 | 5.512838 | -3.09173 | 0.008291 | 0.103104 | -2.58301 |
| Smarca5   | -0.45574 | 7.869948 | -2.33481 | 0.035641 | 0.206402 | -3.93088 |
| Mansc1    | -0.45622 | 4.735267 | -3.31448 | 0.005365 | 0.08353  | -2.17343 |
| Gm6583    | -0.45637 | 3.811447 | -4.98051 | 0.000227 | 0.021561 | 0.825867 |
| Srsf4     | -0.45759 | 7.44617  | -2.90155 | 0.012012 | 0.121193 | -2.92993 |
| Rab43     | -0.45766 | 4.535005 | -4.12243 | 0.001122 | 0.040206 | -0.68997 |
| Col2a1    | -0.4579  | 4.421931 | -3.08175 | 0.008454 | 0.104078 | -2.60129 |
| Zbtb7a    | -0.45803 | 5.520986 | -3.64285 | 0.002828 | 0.062222 | -1.56777 |
| Slc35c2   | -0.45813 | 5.52891  | -2.91307 | 0.011746 | 0.120438 | -2.90902 |
| Prkd3     | -0.4589  | 5.988488 | -2.6445  | 0.01976  | 0.156003 | -3.39169 |
| Galr1     | -0.459   | 4.052236 | -6.37704 | 2.08E-05 | 0.010083 | 3.066777 |
| Slco5a1   | -0.46011 | 5.043545 | -3.41736 | 0.004388 | 0.076026 | -1.98367 |
| Gm11810   | -0.46136 | 5.122508 | -2.69715 | 0.017853 | 0.148337 | -3.29797 |
| Slc38a7   | -0.46166 | 5.536258 | -4.53129 | 0.000519 | 0.029956 | 0.043283 |
| Atat1     | -0.4617  | 4.618273 | -3.0872  | 0.008364 | 0.103502 | -2.59131 |
| Arl5a     | -0.46193 | 7.806146 | -2.63797 | 0.02001  | 0.156933 | -3.40329 |
| Foxi1     | -0.46203 | 4.539332 | -3.2574  | 0.005998 | 0.087839 | -2.2786  |
| Irf2bpl   | -0.46319 | 6.030287 | -2.9685  | 0.010544 | 0.114616 | -2.8082  |
| Efcc1     | -0.46332 | 4.257436 | -5.53152 | 8.56E-05 | 0.014927 | 1.746546 |
| Krtap9-1  | -0.4635  | 5.683451 | -2.17556 | 0.047968 | 0.238399 | -4.19796 |
| Rbfox3    | -0.46447 | 4.204127 | -3.98964 | 0.001447 | 0.045196 | -0.93152 |
| 2310067E1 | -0.46467 | 5.669356 | -2.5753  | 0.022569 | 0.166143 | -3.51406 |
| Agfg2     | -0.46476 | 6.049198 | -2.95897 | 0.010742 | 0.115604 | -2.82556 |
| Syng3     | -0.46477 | 4.438187 | -4.86787 | 0.000279 | 0.023828 | 0.632187 |
| 1700120C1 | -0.4648  | 6.891785 | -2.28102 | 0.039424 | 0.216688 | -4.02197 |
| Gm15767   | -0.46507 | 4.046438 | -4.53528 | 0.000515 | 0.029955 | 0.05035  |
| Tubg1     | -0.46562 | 7.161072 | -2.67067 | 0.018788 | 0.152621 | -3.34517 |
| Usp6nl    | -0.46623 | 5.280555 | -2.86399 | 0.012922 | 0.126079 | -2.998   |
| Pdcl3     | -0.46635 | 7.755107 | -2.99626 | 0.009989 | 0.112245 | -2.75759 |
| Hus1      | -0.46654 | 5.793098 | -2.24331 | 0.0423   | 0.224735 | -4.08532 |
| Smarcd1   | -0.46718 | 6.130018 | -2.45001 | 0.028666 | 0.187487 | -3.73301 |
| Mir667    | -0.46788 | 4.180776 | -4.22266 | 0.000928 | 0.037622 | -0.50864 |
| Gdpd1     | -0.46809 | 5.785489 | -4.53198 | 0.000518 | 0.029956 | 0.044508 |
| Tnnt3     | -0.46814 | 4.062315 | -5.24679 | 0.000141 | 0.017535 | 1.276508 |

|          |          |          |          |          |          |          |
|----------|----------|----------|----------|----------|----------|----------|
| Aqp5     | -0.46828 | 4.825595 | -2.78304 | 0.01512  | 0.137287 | -3.14406 |
| Dapk1    | -0.46838 | 7.94322  | -2.73731 | 0.01652  | 0.142947 | -3.22615 |
| Crb3     | -0.4693  | 4.221731 | -5.45555 | 9.77E-05 | 0.015433 | 1.622359 |
| Scgb1b20 | -0.4694  | 3.851239 | -4.72433 | 0.000363 | 0.026433 | 0.382823 |
| Flrt1    | -0.46989 | 3.845379 | -4.683   | 0.000392 | 0.027042 | 0.310534 |
| Mmp15    | -0.46994 | 6.926002 | -2.90246 | 0.011991 | 0.121077 | -2.92828 |
| Tbcb     | -0.46996 | 6.826219 | -3.36432 | 0.004867 | 0.079559 | -2.08153 |
| Gm5409   | -0.47007 | 4.370433 | -2.43673 | 0.029398 | 0.189988 | -3.75599 |
| Rps28    | -0.47015 | 4.027296 | -4.63335 | 0.000429 | 0.027437 | 0.22339  |
| Trbj2-1  | -0.47043 | 7.117489 | -2.62049 | 0.020694 | 0.159767 | -3.43426 |
| Sla2     | -0.47054 | 4.206626 | -4.04791 | 0.001294 | 0.042778 | -0.82535 |
| Hrct1    | -0.47068 | 6.51336  | -2.62376 | 0.020564 | 0.159184 | -3.42847 |
| Gm3837   | -0.47071 | 8.422197 | -3.84638 | 0.001907 | 0.051748 | -1.19357 |
| Zfp9     | -0.47158 | 5.122281 | -6.1234  | 3.14E-05 | 0.011485 | 2.682792 |
| Dleu2    | -0.47279 | 5.972266 | -2.91067 | 0.011801 | 0.120438 | -2.91338 |
| Rcvrn    | -0.47313 | 4.134201 | -5.16345 | 0.000164 | 0.01849  | 1.136583 |
| Zfp651   | -0.47318 | 6.942122 | -4.39792 | 0.000666 | 0.032994 | -0.19394 |
| Atf5     | -0.47337 | 5.926402 | -5.1325  | 0.000173 | 0.019044 | 1.084362 |
| Aldh3b2  | -0.47366 | 4.767888 | -4.19253 | 0.000982 | 0.038572 | -0.56304 |
| Mirg     | -0.47372 | 3.94136  | -6.75501 | 1.14E-05 | 0.008528 | 3.619792 |
| Pcbp4    | -0.4738  | 7.596758 | -2.87609 | 0.012622 | 0.124572 | -2.97609 |
| Vmn1r170 | -0.47416 | 4.395571 | -2.70461 | 0.017598 | 0.147342 | -3.28465 |
| Bhmt     | -0.47453 | 5.849325 | -2.84704 | 0.013355 | 0.128731 | -3.02866 |
| Dok3     | -0.47467 | 4.242484 | -5.86917 | 4.80E-05 | 0.012162 | 2.287506 |
| Slc1a5   | -0.47566 | 6.408817 | -3.81457 | 0.002028 | 0.053283 | -1.25193 |
| Gm11964  | -0.47569 | 6.348582 | -3.48755 | 0.003827 | 0.070677 | -1.85416 |
| Corin    | -0.4767  | 10.39088 | -2.1607  | 0.049302 | 0.241398 | -4.22246 |
| Ubc      | -0.47697 | 6.982381 | -2.9683  | 0.010548 | 0.114616 | -2.80856 |
| Map1s    | -0.47703 | 6.075938 | -3.61404 | 0.002991 | 0.063125 | -1.62086 |
| 1700066O | -0.4775  | 3.8126   | -3.88708 | 0.001763 | 0.050025 | -1.11899 |
| Rreb1    | -0.47759 | 7.969215 | -4.25918 | 0.000865 | 0.036842 | -0.4428  |
| Foxc1    | -0.47796 | 4.998488 | -3.56749 | 0.003275 | 0.066237 | -1.70669 |
| Gdpgp1   | -0.47845 | 5.195021 | -2.32342 | 0.036412 | 0.208474 | -3.95023 |
| Tmem184k | -0.47854 | 7.809397 | -2.76828 | 0.015559 | 0.138715 | -3.1706  |
| Zfp329   | -0.47938 | 5.83648  | -2.3525  | 0.034473 | 0.203345 | -3.90072 |
| Zfp866   | -0.47984 | 5.173004 | -2.34777 | 0.034782 | 0.204221 | -3.90878 |
| Eif4e    | -0.47996 | 4.917572 | -3.98318 | 0.001465 | 0.045319 | -0.94332 |
| Gm16793  | -0.48022 | 5.297652 | -3.46575 | 0.003993 | 0.072035 | -1.8944  |
| S1pr5    | -0.48039 | 4.068236 | -3.72372 | 0.002417 | 0.057456 | -1.41888 |
| Fmo2     | -0.4804  | 9.170932 | -2.86772 | 0.012829 | 0.12571  | -2.99124 |
| Vit      | -0.48058 | 4.474552 | -3.23805 | 0.006229 | 0.089049 | -2.31423 |
| Hn1      | -0.48084 | 8.314918 | -3.09724 | 0.008202 | 0.102564 | -2.57291 |
| Ptch1    | -0.48145 | 5.793942 | -3.183   | 0.006937 | 0.094011 | -2.41548 |
| H19      | -0.48153 | 4.448849 | -4.01778 | 0.001371 | 0.043852 | -0.88022 |
| 5033406O | -0.48157 | 4.504822 | -4.23353 | 0.000909 | 0.037521 | -0.48902 |
| Wbscr28  | -0.48164 | 4.081445 | -4.14381 | 0.001078 | 0.039687 | -0.65121 |
| Ms4a4d   | -0.48195 | 6.282298 | -2.66275 | 0.019077 | 0.153648 | -3.35926 |
| Slc35e4  | -0.4825  | 4.829227 | -3.14056 | 0.007536 | 0.097851 | -2.49346 |



|           |          |          |          |          |          |          |
|-----------|----------|----------|----------|----------|----------|----------|
| Irx2      | -0.48288 | 5.822201 | -4.26733 | 0.000852 | 0.03634  | -0.42813 |
| Ctgf      | -0.48334 | 7.730662 | -2.6627  | 0.019079 | 0.153648 | -3.35935 |
| 1700007PC | -0.48374 | 5.149245 | -2.6977  | 0.017834 | 0.148327 | -3.29698 |
| Pigm      | -0.48402 | 4.696306 | -2.988   | 0.010151 | 0.112746 | -2.77266 |
| Dmrta2    | -0.48467 | 4.328467 | -4.12729 | 0.001112 | 0.039951 | -0.68115 |
| Gucy1b3   | -0.48658 | 6.616899 | -3.09745 | 0.008199 | 0.102564 | -2.57253 |
| Pim1      | -0.48669 | 6.572571 | -3.42185 | 0.00435  | 0.075672 | -1.9754  |
| Diras1    | -0.48719 | 4.36057  | -4.23257 | 0.00091  | 0.037527 | -0.49076 |
| Akr1e1    | -0.48756 | 5.053257 | -2.32617 | 0.036224 | 0.207782 | -3.94555 |
| Csnk1e    | -0.48763 | 7.325684 | -2.52232 | 0.024977 | 0.174974 | -3.60708 |
| Gdf10     | -0.48764 | 5.019853 | -4.1513  | 0.001062 | 0.039677 | -0.63764 |
| Ighv1-23  | -0.48799 | 4.412255 | -2.90523 | 0.011926 | 0.120869 | -2.92325 |
| Eri1      | -0.48804 | 5.12203  | -4.36482 | 0.000709 | 0.033189 | -0.25313 |
| Tmed1     | -0.48826 | 5.722178 | -5.19383 | 0.000155 | 0.01804  | 1.187716 |
| Pim3      | -0.48858 | 7.908379 | -3.57917 | 0.003201 | 0.065756 | -1.68516 |
| Nrn1l     | -0.48861 | 4.046546 | -4.40111 | 0.000662 | 0.032994 | -0.18826 |
| Tfap4     | -0.48921 | 4.349469 | -3.9982  | 0.001424 | 0.044628 | -0.9159  |
| Hn1l      | -0.48933 | 5.505337 | -4.33202 | 0.000754 | 0.034093 | -0.3119  |
| Mettl10   | -0.4898  | 4.596569 | -3.22611 | 0.006376 | 0.090372 | -2.3362  |
| Chchd2    | -0.48996 | 3.995092 | -4.94415 | 0.000243 | 0.022522 | 0.763547 |
| Dtna      | -0.49007 | 5.461833 | -4.35577 | 0.000721 | 0.033465 | -0.26934 |
| Zar1      | -0.49014 | 4.068409 | -3.44555 | 0.004153 | 0.073862 | -1.93166 |
| 1500017E2 | -0.49017 | 7.276564 | -3.41734 | 0.004388 | 0.076026 | -1.98371 |
| Rcn2      | -0.49034 | 6.175893 | -2.25859 | 0.041111 | 0.221398 | -4.0597  |
| Snx32     | -0.49055 | 5.176927 | -5.98431 | 3.96E-05 | 0.01211  | 2.467814 |
| Hpgd      | -0.49061 | 5.555315 | -2.73897 | 0.016467 | 0.142737 | -3.22318 |
| Tmc7      | -0.49063 | 5.620894 | -3.38708 | 0.004656 | 0.077937 | -2.03954 |
| E030046B0 | -0.49094 | 4.312797 | -3.91516 | 0.00167  | 0.048555 | -1.0676  |
| BC048507  | -0.49129 | 3.810262 | -3.64383 | 0.002823 | 0.062162 | -1.56597 |
| Ddit3     | -0.49133 | 5.377058 | -3.78561 | 0.002144 | 0.054522 | -1.30511 |
| Mphosph6  | -0.49145 | 4.661663 | -3.67535 | 0.002655 | 0.060449 | -1.50791 |
| Tmem121   | -0.49174 | 4.616923 | -3.8368  | 0.001942 | 0.051921 | -1.21115 |
| Cux2      | -0.49193 | 4.566698 | -4.01717 | 0.001373 | 0.043852 | -0.88134 |
| Krtap4-9  | -0.49195 | 4.269648 | -4.50791 | 0.000542 | 0.030405 | 0.001836 |
| Lgr4      | -0.49213 | 7.285187 | -3.45132 | 0.004107 | 0.073296 | -1.92102 |
| Cdc5l     | -0.49301 | 4.933183 | -2.29422 | 0.038462 | 0.213668 | -3.99969 |
| Syndig1   | -0.49348 | 4.236006 | -6.49404 | 1.72E-05 | 0.00969  | 3.240409 |
| Trgj4     | -0.49401 | 3.529036 | -4.21772 | 0.000936 | 0.037622 | -0.51755 |
| Uts2r     | -0.49415 | 4.385735 | -4.3459  | 0.000735 | 0.033696 | -0.28702 |
| Bpgm      | -0.49433 | 6.166897 | -3.63952 | 0.002847 | 0.062253 | -1.57391 |
| Tmem246   | -0.49442 | 6.063338 | -3.34775 | 0.005027 | 0.080753 | -2.11209 |
| Pik3ip1   | -0.49468 | 6.931536 | -2.42371 | 0.030133 | 0.19235  | -3.77849 |
| Rell1     | -0.49498 | 5.771227 | -3.47573 | 0.003916 | 0.071476 | -1.87598 |
| Setd1b    | -0.495   | 5.346578 | -3.89152 | 0.001748 | 0.049941 | -1.11085 |
| Mtmr2     | -0.49572 | 7.028995 | -2.80541 | 0.014479 | 0.13377  | -3.1038  |
| Pdia3     | -0.49588 | 8.862735 | -3.52377 | 0.003566 | 0.068153 | -1.78735 |
| Tdp2      | -0.49602 | 4.835163 | -3.3883  | 0.004644 | 0.077851 | -2.0373  |
| Igkv19-93 | -0.49616 | 4.117481 | -2.41839 | 0.030438 | 0.193269 | -3.78766 |

|           |          |          |          |          |          |          |
|-----------|----------|----------|----------|----------|----------|----------|
| Slc1a6    | -0.49661 | 3.988188 | -4.39891 | 0.000665 | 0.032994 | -0.19217 |
| Gm10144   | -0.49668 | 4.418654 | -4.59806 | 0.000458 | 0.028131 | 0.161258 |
| Phyhip    | -0.49719 | 5.675886 | -3.2246  | 0.006395 | 0.090529 | -2.33899 |
| Cnksr3    | -0.49921 | 6.748928 | -3.06283 | 0.008772 | 0.106039 | -2.63594 |
| Uggt1     | -0.49947 | 5.975362 | -4.25485 | 0.000873 | 0.036956 | -0.4506  |
| Slc18b1   | -0.49975 | 5.217248 | -2.96517 | 0.010613 | 0.114809 | -2.81428 |
| Snrpb     | -0.50001 | 6.733721 | -3.55038 | 0.003386 | 0.066958 | -1.73824 |
| Olfr761   | -0.50037 | 3.7844   | -4.44605 | 0.000609 | 0.031585 | -0.1081  |
| Mir15a    | -0.50071 | 5.817193 | -2.61419 | 0.020946 | 0.160665 | -3.44541 |
| Tspan9    | -0.5011  | 5.321065 | -2.72602 | 0.016884 | 0.144492 | -3.24637 |
| Mir92b    | -0.50111 | 5.110938 | -2.66108 | 0.019139 | 0.153812 | -3.36224 |
| Ankra2    | -0.50118 | 4.277568 | -3.29026 | 0.005625 | 0.085212 | -2.21806 |
| 1700071KC | -0.50174 | 4.507106 | -3.70023 | 0.00253  | 0.058746 | -1.4621  |
| Chtop     | -0.50186 | 6.761766 | -2.30834 | 0.037458 | 0.211396 | -3.97582 |
| Mrpl23    | -0.50241 | 3.711603 | -2.96352 | 0.010647 | 0.114979 | -2.81728 |
| Gm2848    | -0.50277 | 4.358151 | -3.63232 | 0.002887 | 0.062351 | -1.58718 |
| Gpr22     | -0.50299 | 8.044078 | -2.71241 | 0.017334 | 0.146604 | -3.27071 |
| Kcns2     | -0.50311 | 4.311108 | -4.57856 | 0.000475 | 0.028744 | 0.126855 |
| Zfp612    | -0.50319 | 5.491241 | -4.02173 | 0.001361 | 0.043789 | -0.87302 |
| Hrh3      | -0.50327 | 4.485998 | -4.64249 | 0.000422 | 0.027251 | 0.239441 |
| Lmx1b     | -0.50395 | 5.131649 | -3.24514 | 0.006143 | 0.088386 | -2.30117 |
| Kiz       | -0.50437 | 8.562266 | -3.14339 | 0.007495 | 0.097601 | -2.48825 |
| Epha7     | -0.50444 | 5.037981 | -4.90279 | 0.000262 | 0.023269 | 0.692412 |
| Aif1l     | -0.50511 | 4.863007 | -2.72936 | 0.016776 | 0.144108 | -3.24039 |
| Ighv8-6   | -0.50511 | 3.793342 | -5.20427 | 0.000152 | 0.017841 | 1.205249 |
| Slc38a1   | -0.50551 | 5.564626 | -2.91566 | 0.011687 | 0.120141 | -2.90433 |
| Bet1l     | -0.50575 | 5.462782 | -4.13496 | 0.001096 | 0.03993  | -0.66724 |
| Tomm7     | -0.50585 | 5.923506 | -3.50729 | 0.003682 | 0.069402 | -1.81775 |
| Myl1      | -0.50586 | 5.995117 | -2.21069 | 0.044945 | 0.23057  | -4.13975 |
| Ap1s2     | -0.50608 | 6.027561 | -3.83395 | 0.001953 | 0.052095 | -1.21636 |
| Cd53      | -0.50692 | 5.427202 | -3.16646 | 0.007165 | 0.095348 | -2.44589 |
| Sycp3     | -0.50732 | 4.294681 | -4.14794 | 0.001069 | 0.039677 | -0.64373 |
| Gm38490   | -0.5078  | 4.259611 | -3.65433 | 0.002766 | 0.061599 | -1.54663 |
| Mir673    | -0.50848 | 6.668772 | -3.52254 | 0.003574 | 0.068153 | -1.78961 |
| Crlf1     | -0.50923 | 4.446718 | -5.19134 | 0.000156 | 0.01804  | 1.18352  |
| Ooep      | -0.50964 | 4.413961 | -4.40927 | 0.000652 | 0.032816 | -0.17367 |
| Fbln5     | -0.51033 | 6.883019 | -2.85914 | 0.013045 | 0.126825 | -3.00677 |
| Naa50     | -0.51065 | 8.04578  | -3.37523 | 0.004765 | 0.078702 | -2.06141 |
| Vwa9      | -0.51193 | 5.490943 | -4.64865 | 0.000417 | 0.027213 | 0.250266 |
| Trpm5     | -0.51254 | 4.361569 | -5.80209 | 5.38E-05 | 0.012606 | 2.181476 |
| Col27a1   | -0.51299 | 5.088555 | -5.9463  | 4.22E-05 | 0.01211  | 2.408535 |
| Ifna4     | -0.5131  | 5.725545 | -3.26534 | 0.005906 | 0.087233 | -2.26398 |
| Aig1      | -0.51316 | 6.472426 | -3.79488 | 0.002106 | 0.054404 | -1.28807 |
| Eif5      | -0.51336 | 9.198724 | -2.32922 | 0.036018 | 0.20722  | -3.94038 |
| Ung       | -0.51391 | 4.643273 | -2.62912 | 0.020353 | 0.158466 | -3.41897 |
| Chrm1     | -0.51501 | 4.013165 | -4.4666  | 0.000586 | 0.031294 | -0.07153 |
| Gm10013   | -0.51508 | 4.919871 | -3.09187 | 0.008288 | 0.103104 | -2.58276 |
| AY761184  | -0.51557 | 4.640003 | -2.45083 | 0.028621 | 0.187299 | -3.73158 |

|          |          |          |          |          |          |          |
|----------|----------|----------|----------|----------|----------|----------|
| Slc2a1   | -0.51573 | 7.04129  | -3.97698 | 0.001483 | 0.045603 | -0.95463 |
| Gja3     | -0.51595 | 4.912762 | -4.41615 | 0.000644 | 0.032724 | -0.1614  |
| Oxt      | -0.51632 | 4.09503  | -6.42223 | 1.93E-05 | 0.009991 | 3.134102 |
| Rbmxl2   | -0.51703 | 4.319611 | -4.99971 | 0.00022  | 0.021321 | 0.858714 |
| Al854703 | -0.5172  | 3.899439 | -5.31326 | 0.000125 | 0.016945 | 1.387353 |
| Adam19   | -0.51723 | 4.919281 | -3.57274 | 0.003241 | 0.065997 | -1.69701 |
| Bcar1    | -0.51828 | 5.152317 | -2.69693 | 0.017861 | 0.14835  | -3.29837 |
| Tyw3     | -0.51902 | 4.441664 | -5.40121 | 0.000107 | 0.015832 | 1.532978 |
| Fam63b   | -0.51904 | 6.030518 | -3.03841 | 0.0092   | 0.108254 | -2.68061 |
| Zc3h12a  | -0.52052 | 4.240716 | -3.50224 | 0.003719 | 0.069651 | -1.82706 |
| Arid3c   | -0.52105 | 4.050998 | -3.70653 | 0.002499 | 0.058288 | -1.45051 |
| Ccdc3    | -0.52235 | 5.372287 | -3.1675  | 0.00715  | 0.09532  | -2.44397 |
| Gls      | -0.52291 | 8.447856 | -2.91893 | 0.011613 | 0.11989  | -2.89837 |
| Tmem120k | -0.52311 | 5.303548 | -2.28954 | 0.038801 | 0.214718 | -4.00761 |
| Kcne1    | -0.52333 | 4.731827 | -4.46425 | 0.000588 | 0.031294 | -0.07571 |
| C77080   | -0.52436 | 4.325222 | -7.1242  | 6.44E-06 | 0.006956 | 4.138053 |
| Tet3     | -0.52444 | 5.222968 | -3.19402 | 0.006789 | 0.09314  | -2.39523 |
| Ripk4    | -0.52491 | 4.125405 | -5.98843 | 3.93E-05 | 0.01211  | 2.474239 |
| Ncbp2    | -0.52502 | 6.623396 | -3.49649 | 0.003761 | 0.070029 | -1.83767 |
| Plxdc2   | -0.52502 | 8.783712 | -2.50746 | 0.025696 | 0.177101 | -3.63307 |
| C330006A | -0.52557 | 4.918528 | -4.32617 | 0.000762 | 0.034093 | -0.32239 |
| Kdm3a    | -0.52599 | 6.995629 | -2.59328 | 0.021804 | 0.163663 | -3.48237 |
| Mdga1    | -0.52683 | 4.573663 | -4.62256 | 0.000438 | 0.027669 | 0.204399 |
| Olf661   | -0.52822 | 3.948942 | -3.77082 | 0.002207 | 0.055188 | -1.33229 |
| Ighj1    | -0.52844 | 6.508077 | -2.40525 | 0.031205 | 0.195604 | -3.81031 |
| Gm13194  | -0.52908 | 4.797635 | -3.19797 | 0.006737 | 0.092834 | -2.38796 |
| Spg7     | -0.52939 | 6.647088 | -4.16076 | 0.001043 | 0.039578 | -0.62052 |
| Nupr1    | -0.53014 | 6.652408 | -3.00793 | 0.009764 | 0.11113  | -2.73629 |
| Alkbh4   | -0.53015 | 4.560281 | -3.60792 | 0.003027 | 0.06362  | -1.63215 |
| Tmem127  | -0.53021 | 5.955926 | -3.46958 | 0.003963 | 0.071814 | -1.88732 |
| Pdp1     | -0.53083 | 6.657111 | -2.44354 | 0.02902  | 0.188959 | -3.74421 |
| Ihh      | -0.53141 | 4.78182  | -4.98903 | 0.000224 | 0.021397 | 0.840454 |
| Frmd6    | -0.53175 | 6.525957 | -2.22771 | 0.043546 | 0.22786  | -4.1114  |
| Naa10    | -0.5318  | 5.341197 | -4.31374 | 0.000781 | 0.03453  | -0.3447  |
| LOC10263 | -0.53315 | 4.001002 | -3.5206  | 0.003588 | 0.068298 | -1.79319 |
| Pcdhga11 | -0.53358 | 4.983371 | -2.61602 | 0.020872 | 0.160601 | -3.44217 |
| Spr1a    | -0.53389 | 4.296207 | -2.37554 | 0.033008 | 0.199438 | -3.86133 |
| Hsp90b1  | -0.53399 | 10.71185 | -2.49792 | 0.026168 | 0.179011 | -3.64971 |
| Gm5639   | -0.53478 | 5.948432 | -3.32297 | 0.005277 | 0.082814 | -2.15778 |
| Agmat    | -0.5352  | 4.639952 | -4.05929 | 0.001266 | 0.042313 | -0.80464 |
| Pptc7    | -0.53621 | 8.651815 | -2.62554 | 0.020494 | 0.158912 | -3.4253  |
| Bpifb9b  | -0.53637 | 4.215376 | -4.4838  | 0.000567 | 0.03105  | -0.04095 |
| Rdm1     | -0.53651 | 5.632785 | -3.62177 | 0.002947 | 0.062839 | -1.60662 |
| Gm16982  | -0.53705 | 4.70462  | -6.0619  | 3.48E-05 | 0.011845 | 2.588131 |
| Ak8      | -0.53797 | 4.294167 | -4.12396 | 0.001119 | 0.040148 | -0.68719 |
| Ces1b    | -0.53883 | 4.107051 | -4.51412 | 0.000536 | 0.030405 | 0.012847 |
| Rpf2     | -0.53891 | 5.619215 | -2.33545 | 0.035597 | 0.206283 | -3.92977 |
| Gpnmb    | -0.53906 | 4.957682 | -3.02425 | 0.009458 | 0.109319 | -2.7065  |

|           |          |          |          |          |          |          |
|-----------|----------|----------|----------|----------|----------|----------|
| Der11     | -0.53939 | 6.436523 | -5.38404 | 0.000111 | 0.016005 | 1.504637 |
| 311008211 | -0.53958 | 5.265852 | -2.19862 | 0.045963 | 0.23338  | -4.15979 |
| Ddo       | -0.54043 | 6.851369 | -3.16983 | 0.007118 | 0.09532  | -2.4397  |
| Ccrn4l    | -0.54052 | 5.959883 | -3.53329 | 0.0035   | 0.067746 | -1.76977 |
| Dhrs7c    | -0.54089 | 6.983463 | -2.88518 | 0.012401 | 0.123067 | -2.95962 |
| Arhgap44  | -0.54148 | 6.291433 | -2.46585 | 0.027815 | 0.184595 | -3.70553 |
| Klk1b11   | -0.54215 | 4.182702 | -4.06698 | 0.001248 | 0.042022 | -0.79065 |
| Clk1      | -0.54225 | 9.33825  | -3.0242  | 0.009459 | 0.109319 | -2.70658 |
| 2700068HC | -0.5431  | 3.811296 | -4.25571 | 0.000871 | 0.036956 | -0.44906 |
| Osr1      | -0.54364 | 5.957347 | -2.24239 | 0.042372 | 0.224936 | -4.08686 |
| Olf1335   | -0.54394 | 3.512697 | -5.1248  | 0.000175 | 0.019117 | 1.071358 |
| Tcirg1    | -0.54406 | 4.705673 | -4.65246 | 0.000414 | 0.027213 | 0.256963 |
| Npffr1    | -0.54457 | 4.312025 | -4.91034 | 0.000258 | 0.02321  | 0.705416 |
| Camk1g    | -0.54459 | 4.687503 | -3.05384 | 0.008927 | 0.10681  | -2.65238 |
| Fgf7      | -0.54622 | 3.93148  | -5.55882 | 8.17E-05 | 0.014851 | 1.790954 |
| Cntfr     | -0.54688 | 5.480306 | -2.9735  | 0.010442 | 0.114162 | -2.7991  |
| Dppa5a    | -0.54716 | 3.780863 | -5.15558 | 0.000166 | 0.018582 | 1.123319 |
| Arl15     | -0.54757 | 6.479797 | -2.97843 | 0.010342 | 0.11371  | -2.79011 |
| Lum       | -0.54894 | 6.95616  | -2.31425 | 0.037045 | 0.210401 | -3.9658  |
| Nf2       | -0.54942 | 7.388699 | -2.66915 | 0.018843 | 0.152688 | -3.34787 |
| Csf2rb    | -0.54985 | 4.372535 | -3.06358 | 0.008759 | 0.106012 | -2.63457 |
| Sncg      | -0.55012 | 6.346686 | -4.34113 | 0.000741 | 0.033882 | -0.29556 |
| Rrad      | -0.5502  | 9.1012   | -3.24671 | 0.006125 | 0.088386 | -2.29829 |
| Olf1884   | -0.5505  | 3.989722 | -3.93771 | 0.001599 | 0.04755  | -1.02636 |
| Htr6      | -0.55091 | 3.988542 | -4.24354 | 0.000892 | 0.037186 | -0.47098 |
| 4930431PC | -0.55101 | 4.736213 | -5.86985 | 4.80E-05 | 0.012162 | 2.288576 |
| Ogn       | -0.55113 | 9.027167 | -3.06289 | 0.008771 | 0.106039 | -2.63582 |
| LOC102636 | -0.55132 | 4.036516 | -2.32276 | 0.036457 | 0.208551 | -3.95135 |
| Lce3d     | -0.55185 | 4.583286 | -2.44811 | 0.02877  | 0.188035 | -3.7363  |
| Zfp930    | -0.55197 | 4.710015 | -2.88625 | 0.012375 | 0.122909 | -2.95767 |
| Tbx10     | -0.55243 | 4.218414 | -3.73201 | 0.002379 | 0.057429 | -1.40363 |
| Mir339    | -0.55322 | 4.018148 | -4.76284 | 0.000338 | 0.025389 | 0.449991 |
| Pdia6     | -0.55372 | 8.846839 | -2.32403 | 0.03637  | 0.208333 | -3.9492  |
| Trbv2     | -0.55436 | 5.03125  | -5.23498 | 0.000144 | 0.017592 | 1.256736 |
| Aurkaip1  | -0.55447 | 6.583442 | -3.23541 | 0.006261 | 0.089253 | -2.31909 |
| Mrgprx2   | -0.5554  | 4.644499 | -4.46134 | 0.000591 | 0.031294 | -0.08089 |
| Vmn1r2    | -0.55652 | 4.079163 | -4.23594 | 0.000904 | 0.037479 | -0.48468 |
| Gm13111   | -0.5566  | 5.189473 | -2.31657 | 0.036883 | 0.209869 | -3.96185 |
| Pde4d     | -0.55726 | 5.390964 | -3.88224 | 0.001779 | 0.050272 | -1.12785 |
| Adora1    | -0.5583  | 6.376448 | -3.94502 | 0.001577 | 0.047225 | -1.013   |
| Nop56     | -0.55901 | 7.470656 | -4.12945 | 0.001107 | 0.039942 | -0.67723 |
| Il27      | -0.55907 | 4.273524 | -3.73294 | 0.002375 | 0.057429 | -1.40193 |
| Srsf10    | -0.55962 | 6.770318 | -2.42842 | 0.029865 | 0.191748 | -3.77036 |
| AA465934  | -0.55963 | 4.306449 | -3.06088 | 0.008805 | 0.106211 | -2.63951 |
| Morc2a    | -0.55998 | 6.216105 | -2.99526 | 0.010008 | 0.112245 | -2.75942 |
| Mrto4     | -0.56118 | 5.863939 | -2.35237 | 0.034482 | 0.203345 | -3.90095 |
| Gm4793    | -0.56121 | 4.261225 | -5.07849 | 0.000191 | 0.019641 | 0.992891 |
| Myc       | -0.56182 | 5.4424   | -2.17622 | 0.047909 | 0.238299 | -4.19687 |

|           |          |          |          |          |          |          |
|-----------|----------|----------|----------|----------|----------|----------|
| Hdac1     | -0.56198 | 5.13893  | -2.20917 | 0.045072 | 0.230792 | -4.14227 |
| Mir449b   | -0.56228 | 11.33507 | -4.59869 | 0.000458 | 0.028131 | 0.162368 |
| Myh11     | -0.5662  | 7.282003 | -2.3757  | 0.032998 | 0.199438 | -3.86105 |
| Asb15     | -0.56887 | 9.187242 | -3.30532 | 0.005462 | 0.083865 | -2.1903  |
| Gm3409    | -0.56944 | 5.059194 | -3.2082  | 0.006603 | 0.091915 | -2.36916 |
| Alox12    | -0.56959 | 4.92354  | -3.63241 | 0.002886 | 0.062351 | -1.58701 |
| Fbln7     | -0.57062 | 4.318366 | -4.84774 | 0.000289 | 0.024303 | 0.597376 |
| Gm6139    | -0.57099 | 3.801175 | -5.22954 | 0.000145 | 0.01764  | 1.247632 |
| Metap2    | -0.57133 | 9.271952 | -2.36976 | 0.03337  | 0.200485 | -3.87121 |
| Gpr50     | -0.57211 | 4.533118 | -3.75171 | 0.00229  | 0.056417 | -1.36741 |
| Rbbp5     | -0.57269 | 6.680128 | -3.16708 | 0.007156 | 0.09532  | -2.44475 |
| Gm15299   | -0.57292 | 5.006836 | -3.79246 | 0.002116 | 0.05449  | -1.29253 |
| Cops7a    | -0.57301 | 6.898227 | -2.49499 | 0.026314 | 0.179203 | -3.65482 |
| Ptrhd1    | -0.57328 | 4.57648  | -4.10346 | 0.001164 | 0.040865 | -0.72439 |
| Gm10334   | -0.57332 | 4.09827  | -4.91311 | 0.000257 | 0.02321  | 0.710179 |
| Manf      | -0.57436 | 4.46689  | -4.72317 | 0.000364 | 0.026433 | 0.380804 |
| Krt7      | -0.57471 | 4.144287 | -5.99704 | 3.88E-05 | 0.01211  | 2.487629 |
| Chst13    | -0.57512 | 4.446816 | -3.68182 | 0.002622 | 0.060079 | -1.49599 |
| Gmeb1     | -0.57617 | 5.148278 | -2.85548 | 0.013138 | 0.127404 | -3.0134  |
| Antxr2    | -0.5765  | 8.613766 | -3.52011 | 0.003591 | 0.06831  | -1.79409 |
| 1500009L1 | -0.57715 | 5.813965 | -3.11876 | 0.007864 | 0.100105 | -2.53345 |
| Bpnt1     | -0.57777 | 5.228366 | -5.3532  | 0.000117 | 0.016075 | 1.453622 |
| Chn1      | -0.58042 | 6.119456 | -4.67596 | 0.000397 | 0.027132 | 0.298197 |
| Gm12781   | -0.5813  | 4.818888 | -4.36292 | 0.000711 | 0.033246 | -0.25654 |
| Tmcc1     | -0.58148 | 5.459259 | -2.62053 | 0.020692 | 0.159767 | -3.43418 |
| Olfr1085  | -0.58198 | 3.917345 | -6.0063  | 3.82E-05 | 0.01211  | 2.50201  |
| Smarce1   | -0.58234 | 7.652839 | -2.33783 | 0.035438 | 0.205793 | -3.92572 |
| Lfng      | -0.58392 | 5.331577 | -3.27657 | 0.005777 | 0.086342 | -2.24329 |
| Mtus2     | -0.58486 | 7.622447 | -4.61549 | 0.000444 | 0.027766 | 0.191955 |
| Dixdc1    | -0.58535 | 5.14564  | -5.37909 | 0.000112 | 0.016051 | 1.496454 |
| Rpl31     | -0.58549 | 5.647685 | -2.23562 | 0.04291  | 0.226685 | -4.09818 |
| Unc93a    | -0.5861  | 4.348226 | -2.22293 | 0.043935 | 0.228486 | -4.11937 |
| H2-Eb1    | -0.58636 | 5.768504 | -3.4661  | 0.00399  | 0.072035 | -1.89374 |
| Mtfr1     | -0.58682 | 4.944058 | -2.76551 | 0.015643 | 0.138835 | -3.17557 |
| Ewsr1     | -0.58792 | 8.531559 | -2.54679 | 0.023836 | 0.17121  | -3.56421 |
| Fam229a   | -0.58908 | 4.935438 | -4.72567 | 0.000362 | 0.026433 | 0.38517  |
| Lgr6      | -0.58933 | 6.798598 | -2.19438 | 0.046326 | 0.234458 | -4.16683 |
| Slc25a38  | -0.58947 | 6.03518  | -3.49213 | 0.003793 | 0.07031  | -1.84571 |
| Snhg9     | -0.58961 | 4.637    | -4.5103  | 0.00054  | 0.030405 | 0.006078 |
| Rapsn     | -0.5901  | 5.157098 | -3.22251 | 0.006421 | 0.090568 | -2.34283 |
| Sephs1    | -0.59015 | 5.57016  | -2.69717 | 0.017852 | 0.148337 | -3.29793 |
| Echdc2    | -0.59055 | 7.047824 | -2.40594 | 0.031164 | 0.195462 | -3.80912 |
| 1700044KC | -0.59083 | 4.65608  | -3.51874 | 0.003601 | 0.068441 | -1.79662 |
| 2310040G2 | -0.59206 | 5.759959 | -2.94026 | 0.01114  | 0.117558 | -2.8596  |
| Tagln     | -0.59338 | 5.912781 | -3.07296 | 0.0086   | 0.104751 | -2.61739 |
| Fhl3      | -0.59385 | 6.24881  | -4.92506 | 0.000251 | 0.023143 | 0.730738 |
| Scgb3a1   | -0.59435 | 4.478706 | -3.44148 | 0.004187 | 0.074182 | -1.93918 |
| Gucd1     | -0.59465 | 5.640177 | -2.23278 | 0.043137 | 0.226982 | -4.10293 |

|            |          |          |          |          |          |          |
|------------|----------|----------|----------|----------|----------|----------|
| Shc1       | -0.59721 | 5.894267 | -3.09655 | 0.008213 | 0.102651 | -2.57417 |
| Atxn7l1os2 | -0.59757 | 4.146366 | -5.03977 | 0.000204 | 0.02023  | 0.927047 |
| Gm5093     | -0.59793 | 4.766791 | -3.05297 | 0.008942 | 0.106876 | -2.65398 |
| Ubald2     | -0.59927 | 4.223963 | -2.87062 | 0.012757 | 0.125301 | -2.986   |
| Tef        | -0.60141 | 5.637285 | -3.84319 | 0.001919 | 0.051918 | -1.19943 |
| Cd63       | -0.60162 | 6.571425 | -5.96883 | 4.06E-05 | 0.01211  | 2.4437   |
| Cyb5r4     | -0.60193 | 4.932109 | -2.75002 | 0.016119 | 0.141046 | -3.20337 |
| Csrp2      | -0.60306 | 5.031477 | -2.60592 | 0.021281 | 0.162038 | -3.46004 |
| Rprl2      | -0.60394 | 6.392202 | -3.66169 | 0.002727 | 0.061344 | -1.53307 |
| Sacs       | -0.60403 | 6.303453 | -4.62795 | 0.000434 | 0.027635 | 0.213878 |
| Vasn       | -0.60435 | 4.8697   | -3.62419 | 0.002933 | 0.062744 | -1.60216 |
| Camk2a     | -0.60584 | 7.24607  | -4.77744 | 0.000329 | 0.025389 | 0.475405 |
| Tmx2       | -0.60615 | 5.187975 | -2.58624 | 0.022101 | 0.164597 | -3.49479 |
| Gm10865    | -0.60811 | 5.14191  | -5.17221 | 0.000161 | 0.018455 | 1.15135  |
| Crebl2     | -0.60845 | 5.893368 | -3.24059 | 0.006198 | 0.088888 | -2.30955 |
| Ifnl3      | -0.60991 | 4.406147 | -3.50637 | 0.003689 | 0.069422 | -1.81944 |
| Cks1b      | -0.61083 | 4.713955 | -2.65895 | 0.019218 | 0.154113 | -3.36602 |
| Hmgcs2     | -0.61366 | 9.513482 | -2.72125 | 0.017041 | 0.145017 | -3.25491 |
| Fbxo40     | -0.61563 | 7.919725 | -2.91501 | 0.011702 | 0.120141 | -2.9055  |
| Klf11      | -0.61749 | 6.421889 | -2.93558 | 0.011242 | 0.118325 | -2.86812 |
| Atp6v0c-p: | -0.62112 | 8.506497 | -2.35019 | 0.034624 | 0.203657 | -3.90467 |
| Gm8580     | -0.62116 | 7.177863 | -2.32829 | 0.03608  | 0.207388 | -3.94196 |
| Rac2       | -0.62145 | 5.38052  | -3.64785 | 0.002801 | 0.061834 | -1.55856 |
| Olfml2a    | -0.62165 | 4.821827 | -4.75199 | 0.000345 | 0.025745 | 0.431099 |
| Vps72      | -0.62182 | 5.890425 | -2.99407 | 0.010031 | 0.112245 | -2.76159 |
| Olf901     | -0.6222  | 4.016047 | -5.10253 | 0.000182 | 0.019303 | 1.033656 |
| Mir1946a   | -0.62248 | 6.001584 | -2.48438 | 0.026852 | 0.181257 | -3.67331 |
| Mmachc     | -0.62484 | 7.555091 | -3.28716 | 0.005659 | 0.08547  | -2.22378 |
| Slc25a28   | -0.62501 | 8.306308 | -3.98635 | 0.001456 | 0.045242 | -0.93752 |
| Dll4       | -0.62565 | 5.511882 | -2.55997 | 0.023242 | 0.169045 | -3.54105 |
| Sec63      | -0.62568 | 7.855452 | -4.28374 | 0.000826 | 0.035657 | -0.39861 |
| Gm19277    | -0.62998 | 4.979441 | -3.07829 | 0.008511 | 0.104434 | -2.60763 |
| Rnf146     | -0.63055 | 5.029612 | -4.50235 | 0.000548 | 0.030412 | -0.00802 |
| Fundc2     | -0.63059 | 7.930149 | -2.55001 | 0.023689 | 0.17075  | -3.55855 |
| Vpreb2     | -0.63134 | 4.27287  | -4.13406 | 0.001098 | 0.03993  | -0.66888 |
| Max        | -0.63257 | 7.047811 | -3.30862 | 0.005427 | 0.083689 | -2.18423 |
| Nap1l1     | -0.63292 | 6.516547 | -4.14831 | 0.001068 | 0.039677 | -0.64306 |
| Basp1      | -0.63353 | 4.67298  | -6.40332 | 1.99E-05 | 0.010037 | 3.105976 |
| Cxx1b      | -0.63464 | 4.8137   | -3.27025 | 0.005849 | 0.08676  | -2.25492 |
| Zfp637     | -0.6351  | 5.373203 | -2.4116  | 0.030833 | 0.194714 | -3.79938 |
| Spsb1      | -0.63772 | 5.213206 | -6.3552  | 2.15E-05 | 0.010083 | 3.034121 |
| 3830406C1  | -0.63886 | 5.202379 | -6.30922 | 2.32E-05 | 0.01047  | 2.965129 |
| Prkacb     | -0.64062 | 6.977539 | -2.68349 | 0.01833  | 0.150388 | -3.32233 |
| H2-M10.1   | -0.6419  | 3.871433 | -4.87904 | 0.000273 | 0.023519 | 0.651469 |
| Pla2g2d    | -0.64275 | 4.514398 | -4.67271 | 0.000399 | 0.027132 | 0.2925   |
| Gja4       | -0.64427 | 4.941376 | -4.40831 | 0.000653 | 0.032816 | -0.1754  |
| Gm6981     | -0.64463 | 6.109653 | -3.07304 | 0.008599 | 0.104751 | -2.61725 |
| BC004004   | -0.64475 | 9.263563 | -2.58576 | 0.022121 | 0.164697 | -3.49563 |

|           |          |          |          |          |          |          |
|-----------|----------|----------|----------|----------|----------|----------|
| Smad6     | -0.64565 | 5.615163 | -4.68764 | 0.000388 | 0.027042 | 0.318655 |
| Prkar1a   | -0.64651 | 8.783515 | -4.87967 | 0.000273 | 0.023519 | 0.652551 |
| Xlr3a     | -0.64724 | 4.892853 | -4.80446 | 0.000313 | 0.025191 | 0.52237  |
| Grifin    | -0.64781 | 4.740709 | -3.86053 | 0.001855 | 0.051136 | -1.16764 |
| Fam98c    | -0.64829 | 4.865472 | -3.10801 | 0.008031 | 0.10145  | -2.55316 |
| Itgbl1    | -0.64831 | 4.74616  | -3.00183 | 0.009881 | 0.111846 | -2.74743 |
| Gm8350    | -0.64857 | 4.37656  | -3.69354 | 0.002563 | 0.059276 | -1.47442 |
| Rasl10b   | -0.64886 | 6.427036 | -2.97045 | 0.010504 | 0.114429 | -2.80465 |
| Hnrnpul2  | -0.6495  | 7.566691 | -2.51146 | 0.0255   | 0.176534 | -3.62607 |
| Wif1      | -0.65007 | 4.906087 | -3.38407 | 0.004683 | 0.077965 | -2.0451  |
| Cnrip1    | -0.65145 | 4.467894 | -3.94962 | 0.001563 | 0.046979 | -1.0046  |
| Mir210    | -0.65224 | 6.464569 | -3.02965 | 0.009359 | 0.108872 | -2.69662 |
| Ighv11-2  | -0.65339 | 4.926069 | -3.54676 | 0.00341  | 0.067035 | -1.74493 |
| Gpbp1l1   | -0.65477 | 7.172289 | -2.90325 | 0.011973 | 0.121077 | -2.92685 |
| Fam189a1  | -0.65889 | 5.143209 | -3.52694 | 0.003544 | 0.068137 | -1.78149 |
| Hexim1    | -0.65892 | 6.754361 | -5.56967 | 8.01E-05 | 0.014851 | 1.808567 |
| Tmem192   | -0.65973 | 5.025441 | -5.1104  | 0.00018  | 0.019303 | 1.046992 |
| Stc2      | -0.65977 | 5.581573 | -3.35484 | 0.004958 | 0.080194 | -2.09901 |
| Gm26910   | -0.65995 | 4.661886 | -4.29373 | 0.000811 | 0.035296 | -0.38064 |
| Tsg101    | -0.66125 | 7.361755 | -2.5066  | 0.025738 | 0.177204 | -3.63457 |
| Rnf144b   | -0.66227 | 7.265381 | -4.75297 | 0.000344 | 0.025745 | 0.432805 |
| Ap1s3     | -0.66233 | 4.061739 | -4.11473 | 0.001139 | 0.040407 | -0.70393 |
| Pm20d2    | -0.66359 | 8.433831 | -2.52083 | 0.025048 | 0.17531  | -3.60969 |
| Mir467e   | -0.66515 | 5.428491 | -3.30373 | 0.005479 | 0.084015 | -2.19325 |
| Timp1     | -0.66535 | 4.470383 | -2.27249 | 0.040058 | 0.21853  | -4.03634 |
| Igkv4-57  | -0.66567 | 4.198251 | -4.41765 | 0.000642 | 0.032715 | -0.15873 |
| 1110019D1 | -0.66701 | 4.740716 | -3.63533 | 0.00287  | 0.062351 | -1.58163 |
| Rnu11     | -0.66876 | 8.591404 | -2.53213 | 0.024513 | 0.173222 | -3.5899  |
| Gm5849    | -0.66922 | 7.809106 | -2.48006 | 0.027073 | 0.182091 | -3.68083 |
| Kctd12    | -0.66931 | 5.808899 | -2.22055 | 0.04413  | 0.228938 | -4.12334 |
| Mir208a   | -0.66955 | 5.35419  | -2.73679 | 0.016537 | 0.14298  | -3.22709 |
| Bmp4      | -0.66984 | 6.460978 | -2.71208 | 0.017346 | 0.146621 | -3.27131 |
| Ndufb10   | -0.6703  | 9.491347 | -2.30098 | 0.037978 | 0.212405 | -3.98828 |
| Psm3      | -0.67179 | 6.185099 | -2.3006  | 0.038005 | 0.212506 | -3.98891 |
| Ccdc92    | -0.67444 | 4.634623 | -6.03185 | 3.66E-05 | 0.011961 | 2.541651 |
| Setd8     | -0.67513 | 10.73047 | -8.67281 | 7.13E-07 | 0.003241 | 6.088332 |
| Gstm3     | -0.67737 | 3.687926 | -5.61695 | 7.39E-05 | 0.014571 | 1.885127 |
| Strip2    | -0.67774 | 8.619788 | -3.00442 | 0.009831 | 0.111523 | -2.7427  |
| Gatsl2    | -0.67862 | 5.793827 | -2.20927 | 0.045064 | 0.230792 | -4.14211 |
| Olf1463   | -0.67913 | 3.797399 | -7.52373 | 3.55E-06 | 0.005475 | 4.675034 |
| Fam174b   | -0.68226 | 8.881202 | -5.25791 | 0.000138 | 0.017535 | 1.295098 |
| Id2       | -0.68396 | 6.035624 | -2.31965 | 0.03667  | 0.209137 | -3.95663 |
| Mettl9    | -0.68523 | 8.289544 | -2.94144 | 0.011115 | 0.11753  | -2.85747 |
| Fam126a   | -0.68675 | 6.668993 | -2.99407 | 0.010031 | 0.112245 | -2.7616  |
| Igkv4-58  | -0.68678 | 6.535516 | -4.97388 | 0.00023  | 0.021582 | 0.814517 |
| Gm6682    | -0.68768 | 5.891998 | -3.71256 | 0.00247  | 0.057893 | -1.43941 |
| Lyar      | -0.68838 | 5.146532 | -5.39823 | 0.000108 | 0.015832 | 1.528066 |
| Arhgdib   | -0.69388 | 5.76455  | -4.51579 | 0.000534 | 0.030387 | 0.015812 |

|           |          |          |          |          |          |          |
|-----------|----------|----------|----------|----------|----------|----------|
| Klhl41    | -0.69461 | 8.001004 | -3.07621 | 0.008546 | 0.104601 | -2.61143 |
| Mettl7a2  | -0.69521 | 4.869841 | -4.53918 | 0.000511 | 0.029841 | 0.057251 |
| Gm10029   | -0.69729 | 4.307278 | -3.62085 | 0.002952 | 0.062839 | -1.60832 |
| Gm8465    | -0.69842 | 5.39542  | -3.85754 | 0.001866 | 0.051301 | -1.17311 |
| Lilrb4    | -0.69927 | 8.20147  | -2.99987 | 0.009919 | 0.11213  | -2.75101 |
| Mir297a-4 | -0.6996  | 4.907199 | -4.09875 | 0.001174 | 0.04106  | -0.73293 |
| Gcsh      | -0.69987 | 4.767415 | -3.96203 | 0.001526 | 0.046489 | -0.98191 |
| Abr       | -0.70003 | 5.560794 | -5.23897 | 0.000143 | 0.017592 | 1.263419 |
| Calr      | -0.70024 | 10.40932 | -4.02142 | 0.001362 | 0.043789 | -0.87359 |
| Mir181d   | -0.70067 | 5.862067 | -4.01079 | 0.00139  | 0.044033 | -0.89295 |
| Rap1gap2  | -0.7025  | 6.598782 | -5.88338 | 4.69E-05 | 0.012162 | 2.309883 |
| Mrps16    | -0.705   | 5.83744  | -2.58064 | 0.022339 | 0.165726 | -3.50465 |
| Arf3      | -0.70532 | 5.671268 | -3.27802 | 0.005761 | 0.086188 | -2.24062 |
| Ank       | -0.71149 | 9.116262 | -5.89425 | 4.60E-05 | 0.012162 | 2.326967 |
| Olfir538  | -0.71179 | 5.113668 | -4.41832 | 0.000641 | 0.032715 | -0.15753 |
| Ppp1r2    | -0.71196 | 7.042945 | -2.44104 | 0.029158 | 0.189311 | -3.74853 |
| Bambi     | -0.71329 | 5.891402 | -3.21111 | 0.006566 | 0.091547 | -2.3638  |
| Cysrt1    | -0.71364 | 4.217562 | -4.11898 | 0.00113  | 0.040298 | -0.69622 |
| LOC10263  | -0.71509 | 6.10046  | -3.37452 | 0.004771 | 0.078726 | -2.0627  |
| Cyp2a22   | -0.71613 | 4.581065 | -3.37854 | 0.004734 | 0.07842  | -2.0553  |
| Ighv2-2   | -0.71674 | 7.313178 | -4.78654 | 0.000324 | 0.025382 | 0.491236 |
| Gm6570    | -0.7172  | 5.584432 | -2.90875 | 0.011845 | 0.120438 | -2.91687 |
| Kcng2     | -0.71754 | 6.398882 | -3.29442 | 0.005579 | 0.084885 | -2.2104  |
| Gm26536   | -0.71856 | 4.89251  | -6.95061 | 8.39E-06 | 0.007613 | 3.897049 |
| Gm13919   | -0.72051 | 4.092382 | -3.21366 | 0.006533 | 0.091305 | -2.35911 |
| Pfkfb2    | -0.72076 | 7.954234 | -2.86719 | 0.012842 | 0.125792 | -2.99221 |
| Penk      | -0.72151 | 5.631107 | -3.62356 | 0.002936 | 0.062766 | -1.60331 |
| 2410022M  | -0.72394 | 5.724457 | -2.32673 | 0.036186 | 0.207661 | -3.94461 |
| Dctn5     | -0.72636 | 7.735779 | -2.59509 | 0.021728 | 0.16334  | -3.47916 |
| Tuba1a    | -0.72719 | 4.059745 | -2.36456 | 0.033699 | 0.201529 | -3.88012 |
| Smim20    | -0.72742 | 6.869524 | -2.4247  | 0.030076 | 0.19235  | -3.77678 |
| Tmem55a   | -0.72753 | 6.747074 | -2.93771 | 0.011196 | 0.118032 | -2.86425 |
| Cd200     | -0.72812 | 7.493849 | -2.26288 | 0.040784 | 0.220393 | -4.0525  |
| Zfp623    | -0.73095 | 4.907962 | -3.59346 | 0.003113 | 0.064607 | -1.65881 |
| Cybb      | -0.73334 | 5.261912 | -3.02141 | 0.00951  | 0.109763 | -2.71169 |
| Rundc1    | -0.7358  | 5.237569 | -3.7479  | 0.002307 | 0.056499 | -1.3744  |
| Ezr       | -0.73625 | 8.300171 | -2.6452  | 0.019733 | 0.155883 | -3.39044 |
| Egln3     | -0.73752 | 7.324599 | -2.46099 | 0.028074 | 0.18547  | -3.71397 |
| Zfp386    | -0.73999 | 5.094849 | -4.76509 | 0.000337 | 0.025389 | 0.45391  |
| Olfir452  | -0.74213 | 4.255888 | -4.87917 | 0.000273 | 0.023519 | 0.651689 |
| Npm3      | -0.74292 | 7.518514 | -3.50118 | 0.003726 | 0.069704 | -1.82902 |
| Klra13-ps | -0.74445 | 7.880052 | -4.04104 | 0.001311 | 0.043008 | -0.83786 |
| Gm8234    | -0.74522 | 4.080188 | -5.72083 | 6.18E-05 | 0.013916 | 2.052086 |
| Smok4a    | -0.7492  | 4.022861 | -4.85879 | 0.000284 | 0.023996 | 0.616481 |
| Zfp706    | -0.74967 | 6.930342 | -5.27704 | 0.000134 | 0.017404 | 1.327026 |
| Olfir1411 | -0.75068 | 4.794256 | -4.89611 | 0.000265 | 0.0234   | 0.680902 |
| Gm8618    | -0.75386 | 7.142276 | -3.10337 | 0.008104 | 0.10201  | -2.56167 |
| Gm13777   | -0.75625 | 4.796355 | -5.05106 | 0.0002   | 0.020075 | 0.946283 |



|           |          |          |          |          |          |          |
|-----------|----------|----------|----------|----------|----------|----------|
| Ifna5     | -0.75739 | 5.710008 | -3.54022 | 0.003453 | 0.067439 | -1.75698 |
| Prmt1     | -0.75831 | 5.866126 | -2.80821 | 0.0144   | 0.13377  | -3.09875 |
| Fgf16     | -0.76053 | 4.97309  | -4.63772 | 0.000426 | 0.027352 | 0.231066 |
| Snph      | -0.76168 | 5.27085  | -4.20298 | 0.000963 | 0.038237 | -0.54416 |
| Lincrd1   | -0.76176 | 4.233053 | -4.16031 | 0.001044 | 0.039578 | -0.62132 |
| Mir1945   | -0.76183 | 4.506941 | -3.35378 | 0.004968 | 0.080256 | -2.10096 |
| Sgpl1     | -0.76294 | 5.984253 | -2.65595 | 0.019329 | 0.154459 | -3.37136 |
| Ss18l1    | -0.76348 | 5.291599 | -5.11865 | 0.000177 | 0.019244 | 1.060946 |
| Olfml2b   | -0.76377 | 6.772902 | -2.9711  | 0.010491 | 0.114365 | -2.80347 |
| Gm11937   | -0.76708 | 5.193607 | -3.11839 | 0.00787  | 0.100127 | -2.53414 |
| Tollip    | -0.76848 | 7.261756 | -2.18203 | 0.047397 | 0.237082 | -4.18728 |
| 1810043HC | -0.77717 | 5.476485 | -6.04675 | 3.57E-05 | 0.011961 | 2.564717 |
| Vmn2r29   | -0.78043 | 5.747969 | -3.04095 | 0.009155 | 0.108065 | -2.67597 |
| Vmn1r43   | -0.78159 | 4.99625  | -2.84421 | 0.013428 | 0.12907  | -3.03377 |
| Styx      | -0.78315 | 7.027696 | -2.49618 | 0.026255 | 0.179203 | -3.65275 |
| Sulf2     | -0.78328 | 7.92216  | -4.01622 | 0.001375 | 0.043852 | -0.88306 |
| Rps11     | -0.78422 | 5.506816 | -3.77412 | 0.002193 | 0.054941 | -1.32621 |
| Gm7072    | -0.78736 | 5.066444 | -2.67813 | 0.01852  | 0.151402 | -3.33189 |
| Myl9      | -0.78979 | 7.406047 | -3.85155 | 0.001888 | 0.051557 | -1.18409 |
| Mfap4     | -0.79264 | 6.635908 | -2.39206 | 0.031993 | 0.197039 | -3.83298 |
| Gdap10    | -0.79488 | 5.933777 | -2.3831  | 0.03254  | 0.198415 | -3.84836 |
| Cml3      | -0.80128 | 5.521722 | -2.828   | 0.013858 | 0.131543 | -3.06306 |
| Efhd2     | -0.80923 | 6.861498 | -2.38736 | 0.032279 | 0.197762 | -3.84105 |
| H2afy3    | -0.81113 | 5.49271  | -4.08201 | 0.001212 | 0.041512 | -0.76335 |
| Cox11     | -0.81221 | 5.634098 | -3.01142 | 0.009698 | 0.110901 | -2.72993 |
| Gm31464   | -0.81243 | 6.488807 | -2.42896 | 0.029834 | 0.191748 | -3.76942 |
| Thbs2     | -0.81283 | 7.542803 | -5.46101 | 9.68E-05 | 0.015433 | 1.631316 |
| Prr1      | -0.81693 | 4.624088 | -6.93656 | 8.57E-06 | 0.007613 | 3.877333 |
| Mir483    | -0.8173  | 6.46993  | -2.59294 | 0.021818 | 0.163663 | -3.48296 |
| Sat1      | -0.81853 | 6.673418 | -2.29897 | 0.038122 | 0.212775 | -3.99168 |
| Sec11c    | -0.81855 | 5.516832 | -3.6203  | 0.002955 | 0.062839 | -1.60933 |
| Trav13-2  | -0.81951 | 6.503655 | -3.43324 | 0.004254 | 0.074851 | -1.95438 |
| Gm26666   | -0.82428 | 4.303028 | -6.17497 | 2.89E-05 | 0.01118  | 2.761703 |
| Mir1895   | -0.82564 | 5.044864 | -3.03034 | 0.009346 | 0.108872 | -2.69536 |
| Olfrl303  | -0.82571 | 4.531157 | -3.18677 | 0.006886 | 0.093439 | -2.40857 |
| Ppid      | -0.83867 | 4.450129 | -4.52113 | 0.000529 | 0.030313 | 0.025279 |
| Mpped2    | -0.84017 | 6.191406 | -6.16705 | 2.92E-05 | 0.01118  | 2.749608 |
| Mir665    | -0.84488 | 4.680749 | -4.8584  | 0.000284 | 0.023996 | 0.615819 |
| Bloc1s2   | -0.85618 | 4.622367 | -3.92324 | 0.001644 | 0.048299 | -1.05281 |
| Ostc      | -0.85642 | 6.60532  | -3.31016 | 0.00541  | 0.08365  | -2.18138 |
| Snrpc     | -0.85712 | 6.477851 | -2.39345 | 0.03191  | 0.197038 | -3.8306  |
| Tuba8     | -0.86127 | 9.822944 | -3.35855 | 0.004922 | 0.079874 | -2.09216 |
| Mir1956   | -0.86568 | 7.34613  | -4.40817 | 0.000653 | 0.032816 | -0.17565 |
| Rcsd1     | -0.86935 | 5.555722 | -8.17699 | 1.40E-06 | 0.003241 | 5.50158  |
| Lce3c     | -0.87025 | 4.70127  | -5.06231 | 0.000196 | 0.019937 | 0.965402 |
| Cdh24     | -0.87035 | 4.666226 | -8.53753 | 8.54E-07 | 0.003241 | 5.93159  |
| 1110034G2 | -0.87782 | 6.178928 | -4.32826 | 0.000759 | 0.034093 | -0.31863 |
| Ciz1      | -0.87825 | 6.639652 | -3.25683 | 0.006005 | 0.087839 | -2.27966 |

|           |          |          |          |          |          |          |
|-----------|----------|----------|----------|----------|----------|----------|
| Otx1      | -0.87845 | 4.872135 | -4.7976  | 0.000317 | 0.025191 | 0.510462 |
| Mmp12     | -0.88232 | 4.362386 | -5.87482 | 4.76E-05 | 0.012162 | 2.296401 |
| Tom20     | -0.88971 | 5.556122 | -3.07594 | 0.00855  | 0.104605 | -2.61194 |
| Gm8623    | -0.89925 | 4.292887 | -4.24187 | 0.000894 | 0.037241 | -0.47398 |
| 1700066CC | -0.90357 | 4.288776 | -4.58382 | 0.000471 | 0.028689 | 0.136139 |
| Gm5879    | -0.90518 | 5.363166 | -5.94628 | 4.22E-05 | 0.01211  | 2.408503 |
| Il17d     | -0.90846 | 4.600296 | -6.67974 | 1.28E-05 | 0.008594 | 3.511498 |
| Rps20     | -0.91307 | 6.297373 | -4.17541 | 0.001015 | 0.039168 | -0.594   |
| Mettl7a1  | -0.91411 | 7.833635 | -3.36228 | 0.004887 | 0.079659 | -2.08529 |
| Lgals3    | -0.91465 | 7.614614 | -3.62273 | 0.002941 | 0.062814 | -1.60485 |
| Gm15807   | -0.91686 | 5.141344 | -3.677   | 0.002647 | 0.060349 | -1.50487 |
| Gm6548    | -0.91694 | 5.802762 | -2.58846 | 0.022007 | 0.164239 | -3.49086 |
| Enpp2     | -0.92141 | 6.137929 | -4.61526 | 0.000444 | 0.027766 | 0.191551 |
| Tuba4a    | -0.92925 | 9.916558 | -4.77524 | 0.00033  | 0.025389 | 0.471588 |
| Cyp2e1    | -0.94121 | 4.922952 | -2.6066  | 0.021253 | 0.16197  | -3.45883 |
| Srsf3     | -0.94724 | 5.452488 | -4.62184 | 0.000439 | 0.027669 | 0.203131 |
| Fibin     | -0.94893 | 6.037255 | -3.74965 | 0.002299 | 0.05644  | -1.37119 |
| Ppp1r14c  | -0.95567 | 6.668162 | -3.03083 | 0.009337 | 0.108872 | -2.69447 |
| 1700003F1 | -0.97869 | 5.495032 | -8.86928 | 5.50E-07 | 0.003241 | 6.311598 |
| Gm38519   | -0.98008 | 7.635125 | -2.29754 | 0.038224 | 0.21282  | -3.99409 |
| Igkv2-137 | -0.98167 | 7.511932 | -7.7079  | 2.71E-06 | 0.004818 | 4.914416 |
| Hsd11b1   | -0.98225 | 6.780684 | -3.93031 | 0.001622 | 0.04804  | -1.03988 |
| Trbc2     | -0.98286 | 6.488224 | -3.47988 | 0.003884 | 0.071265 | -1.86831 |
| Fbxw23    | -0.98506 | 3.88019  | -8.06864 | 1.62E-06 | 0.003366 | 5.368774 |
| Angptl7   | -0.98894 | 5.972978 | -2.24131 | 0.042457 | 0.225291 | -4.08866 |
| Taf9      | -1.00312 | 4.705307 | -4.65467 | 0.000413 | 0.027213 | 0.260836 |
| Gm10257   | -1.01287 | 8.338291 | -2.31091 | 0.037277 | 0.210788 | -3.97145 |
| Atp5o     | -1.02168 | 6.336978 | -3.04152 | 0.009144 | 0.108038 | -2.67492 |
| Bcap31    | -1.02505 | 5.904141 | -6.61216 | 1.42E-05 | 0.008683 | 3.413487 |
| Trbj2-5   | -1.02809 | 6.155226 | -4.46662 | 0.000586 | 0.031294 | -0.07149 |
| Aph1a     | -1.02841 | 5.688758 | -4.03274 | 0.001332 | 0.043465 | -0.85297 |
| Nmrk2     | -1.03671 | 5.057653 | -5.67189 | 6.72E-05 | 0.014278 | 1.973633 |
| 2610042L0 | -1.04724 | 4.422341 | -6.97013 | 8.14E-06 | 0.007613 | 3.924381 |
| Spin2d    | -1.04945 | 4.705583 | -6.14451 | 3.03E-05 | 0.011427 | 2.715144 |
| Gm34731   | -1.05103 | 5.933794 | -2.49867 | 0.02613  | 0.178904 | -3.64841 |
| Igfbp3    | -1.06356 | 6.982707 | -3.3478  | 0.005027 | 0.080753 | -2.11199 |
| Pcnp      | -1.07421 | 5.874841 | -3.5415  | 0.003445 | 0.067324 | -1.75462 |
| Mrfap1    | -1.09179 | 7.671878 | -2.31413 | 0.037053 | 0.210401 | -3.966   |
| 9030025P2 | -1.0923  | 4.686598 | -6.74982 | 1.15E-05 | 0.008528 | 3.612365 |
| Tcrg-V1   | -1.09347 | 6.943176 | -8.17077 | 1.41E-06 | 0.003241 | 5.493996 |
| Trdj1     | -1.09624 | 5.58453  | -5.71172 | 6.28E-05 | 0.013916 | 2.037507 |
| Gm5453    | -1.10888 | 8.035078 | -2.98721 | 0.010166 | 0.112746 | -2.77411 |
| 3000002C1 | -1.13742 | 6.498511 | -2.82604 | 0.013911 | 0.13171  | -3.06659 |
| Ppp1r2-ps | -1.1401  | 5.430766 | -4.09631 | 0.00118  | 0.041181 | -0.73736 |
| Mir3058   | -1.15468 | 6.677053 | -5.51668 | 8.78E-05 | 0.014957 | 1.722363 |
| Gm6404    | -1.16589 | 9.535543 | -2.38863 | 0.032202 | 0.197419 | -3.83888 |
| Pcdhga7   | -1.17418 | 6.425117 | -2.22466 | 0.043793 | 0.228192 | -4.11647 |
| Mir1190   | -1.18194 | 6.039402 | -3.21697 | 0.006491 | 0.091046 | -2.35301 |

|          |          |          |          |          |          |          |
|----------|----------|----------|----------|----------|----------|----------|
| Zhx3     | -1.20589 | 6.659587 | -4.68721 | 0.000389 | 0.027042 | 0.317911 |
| Gm38514  | -1.22076 | 4.5099   | -5.44173 | 0.0001   | 0.015433 | 1.599666 |
| Gm5523   | -1.25358 | 7.565918 | -3.64744 | 0.002803 | 0.061834 | -1.55932 |
| Gm12295  | -1.28234 | 7.004015 | -3.78    | 0.002168 | 0.05469  | -1.31542 |
| Mir3473d | -1.29879 | 5.595883 | -5.90095 | 4.55E-05 | 0.012162 | 2.337498 |
| Mir187   | -1.37711 | 5.288171 | -2.93391 | 0.011279 | 0.118588 | -2.87115 |
| Trbj1-6  | -1.41663 | 7.657084 | -2.9617  | 0.010685 | 0.115335 | -2.82058 |
| Gm8526   | -1.4229  | 5.198381 | -6.21968 | 2.68E-05 | 0.010947 | 2.82978  |
| Al607873 | -1.4631  | 4.652237 | -4.39823 | 0.000666 | 0.032994 | -0.1934  |
| Olf472   | -1.48758 | 5.392276 | -3.53221 | 0.003508 | 0.067788 | -1.77177 |
| Inmt     | -1.5492  | 5.958147 | -4.56474 | 0.000488 | 0.029068 | 0.102448 |
| Igkj5    | -1.63376 | 7.046892 | -3.08312 | 0.008431 | 0.103975 | -2.59878 |
| Gm14305  | -1.72132 | 7.091651 | -4.38003 | 0.000689 | 0.033    | -0.22592 |
| Lce1j    | -1.83936 | 6.948808 | -4.06987 | 0.001241 | 0.041978 | -0.7854  |
| Sft2d1   | -1.90051 | 5.333925 | -4.35115 | 0.000727 | 0.033614 | -0.2776  |
| Gm10051  | -2.81388 | 10.38147 | -3.65645 | 0.002755 | 0.061581 | -1.54272 |
| Myh7     | -2.85817 | 10.37072 | -6.94989 | 8.40E-06 | 0.007613 | 3.896037 |
