# Supplementary material for: [Retracted] Disorder Genes Regulate the Progression of Ischemic Stroke through the NF‐κB Signaling Pathway
Source: Hindawi journal article supplement (doi:10.1155/2021/2464269), 2021-01-01
Supplement: f2 [file 2464269.f2.pdf]

**Table S2. Enrichment\_all**

| Module   | ID        | Description            | GeneRatio | BgRatio   | pvalue   | p.adjust | qvalue   | geneID     |
|----------|-----------|------------------------|-----------|-----------|----------|----------|----------|------------|
| GO_BP_m1 | GO:004345 | regulation of          | 5/2606    | 5/23843   | 1.55E-05 | 0.045515 | 0.04328  | Bpgm/Hsd   |
| GO_BP_m1 | GO:007097 | protein localization   | 5/2606    | 5/23843   | 1.55E-05 | 0.045515 | 0.04328  | Bcap29/Bca |
| GO_BP_m1 | GO:200015 | negative regulation of | 5/2606    | 5/23843   | 1.55E-05 | 0.045515 | 0.04328  | Amh/Hyal3  |
| GO_BP_m1 | GO:000963 | response to            | 62/2606   | 337/23843 | 2.80E-05 | 0.061596 | 0.058572 | Abat/Adh1  |
| GO_BP_m1 | GO:004578 | negative regulation of | 75/2606   | 442/23843 | 7.48E-05 | 0.131424 | 0.12497  | Atr/AY0748 |
| GO_BP_m1 | GO:000301 | vascular process       | 39/2606   | 194/23843 | 0.000123 | 0.179743 | 0.170916 | Acta2/Adr  |
| GO_BP_m1 | GO:004748 | regulation of          | 6/2606    | 10/23843  | 0.000241 | 0.206138 | 0.196015 | Abcb1a/Gy  |
| GO_BP_m1 | GO:005158 | negative regulation of | 10/2606   | 26/23843  | 0.000243 | 0.206138 | 0.196015 | Abat/Arl6i |
| GO_BP_m1 | GO:000945 | RNA modification       | 28/2606   | 128/23843 | 0.00025  | 0.206138 | 0.196015 | Virma/2210 |
| GO_BP_m1 | GO:190203 | regulation of          | 5/2606    | 7/23843   | 0.00027  | 0.206138 | 0.196015 | Bpgm/Hsd   |
| GO_BP_m1 | GO:004311 | receptor class         | 16/2606   | 57/23843  | 0.000287 | 0.206138 | 0.196015 | Cdh2/Cdk5  |
| GO_BP_m1 | GO:009775 | negative regulation of | 24/2606   | 104/23843 | 0.000292 | 0.206138 | 0.196015 | Acta2/Adr  |
| GO_BP_m1 | GO:004426 | cellular carcinoma     | 48/2606   | 266/23843 | 0.000338 | 0.206138 | 0.196015 | Abhd10/Ac  |
| GO_BP_m1 | GO:005088 | regulation of          | 34/2606   | 170/23843 | 0.000356 | 0.206138 | 0.196015 | Acta2/Adr  |
| GO_BP_m1 | GO:003276 | regulation of          | 13/2606   | 42/23843  | 0.00037  | 0.206138 | 0.196015 | Atp2b4/Ca  |
| GO_BP_m1 | GO:004427 | cellular carcinoma     | 11/2606   | 32/23843  | 0.000377 | 0.206138 | 0.196015 | Abhd10/Pc  |
| GO_BP_m1 | GO:003515 | regulation of          | 34/2606   | 171/23843 | 0.000399 | 0.206138 | 0.196015 | Acta2/Adr  |
| GO_BP_m1 | GO:000166 | ameboid movement       | 63/2606   | 378/23843 | 0.000442 | 0.20835  | 0.198118 | Acta2/Ada  |
| GO_BP_m1 | GO:004428 | small molecule         | 52/2606   | 298/23843 | 0.000452 | 0.20835  | 0.198118 | Abat/Abcd  |
| GO_BP_m1 | GO:001585 | organic hydrocarbon    | 41/2606   | 221/23843 | 0.000495 | 0.20835  | 0.198118 | Abat/Abca  |
| GO_BP_m1 | GO:005134 | regulation of          | 19/2606   | 77/23843  | 0.000498 | 0.20835  | 0.198118 | Abl2/Aoc3, |
| GO_BP_m1 | GO:000761 | learning               | 32/2606   | 161/23843 | 0.000585 | 0.209255 | 0.198978 | Abl2/Adar  |
| GO_BP_m1 | GO:005118 | cofactor metabolism    | 74/2606   | 465/23843 | 0.000603 | 0.209255 | 0.198978 | Acot1/Acoi |
| GO_BP_m1 | GO:001482 | vascular smooth muscle | 9/2606    | 24/23843  | 0.000619 | 0.209255 | 0.198978 | Acta2/Bbs2 |
| GO_BP_m1 | GO:006002 | soft palate            | 4/2606    | 5/23843   | 0.00065  | 0.209255 | 0.198978 | Col11a2/Fc |
| GO_BP_m1 | GO:190594 | negative regulation of | 5/2606    | 8/23843   | 0.000655 | 0.209255 | 0.198978 | Amh/Hyal3  |
| GO_BP_m1 | GO:001569 | ammonium ion           | 25/2606   | 116/23843 | 0.00066  | 0.209255 | 0.198978 | Abat/Abcb  |
| GO_BP_m1 | GO:006032 | cell chemotaxis        | 48/2606   | 274/23843 | 0.00067  | 0.209255 | 0.198978 | Adam8/Bca  |
| GO_BP_m1 | GO:007037 | regulation of          | 54/2606   | 318/23843 | 0.000695 | 0.209255 | 0.198978 | Abl2/Acta2 |
| GO_BP_m1 | GO:190136 | organic cycle          | 76/2606   | 483/23843 | 0.000716 | 0.209255 | 0.198978 | Aifm1/Aldh |
| GO_BP_m1 | GO:005166 | localization           | 27/2606   | 130/23843 | 0.000754 | 0.209255 | 0.198978 | Arhgap44/  |
| GO_BP_m1 | GO:004231 | vasoconstriction       | 22/2606   | 98/23843  | 0.000762 | 0.209255 | 0.198978 | Acta2/Adr  |
| GO_BP_m1 | GO:007190 | negative regulation of | 23/2606   | 105/23843 | 0.00084  | 0.223588 | 0.212608 | Cav1/Cav3. |
| GO_BP_m1 | GO:000803 | tRNA processing        | 24/2606   | 112/23843 | 0.000912 | 0.223588 | 0.212608 | 2210016F1  |
| GO_BP_m1 | GO:003529 | regulation of          | 31/2606   | 159/23843 | 0.000986 | 0.223588 | 0.212608 | Acta2/Adr  |
| GO_BP_m1 | GO:009774 | regulation of          | 31/2606   | 159/23843 | 0.000986 | 0.223588 | 0.212608 | Acta2/Adr  |
| GO_BP_m1 | GO:001584 | monoamine              | 21/2606   | 94/23843  | 0.001061 | 0.223588 | 0.212608 | Abat/Adra. |
| GO_BP_m1 | GO:001701 | regulation of          | 21/2606   | 94/23843  | 0.001061 | 0.223588 | 0.212608 | Cav1/Cav3. |
| GO_BP_m1 | GO:009875 | detoxification         | 12/2606   | 41/23843  | 0.001075 | 0.223588 | 0.212608 | Adh5/Cd36  |
| GO_BP_m1 | GO:000801 | blood circulation      | 73/2606   | 467/23843 | 0.001082 | 0.223588 | 0.212608 | Abat/Acta2 |
| GO_BP_m1 | GO:004662 | regulation of          | 23/2606   | 107/23843 | 0.001103 | 0.223588 | 0.212608 | Akap6/Arx  |
| GO_BP_m1 | GO:009917 | postsynaptic           | 24/2606   | 114/23843 | 0.001183 | 0.223588 | 0.212608 | Abl2/Arhg  |
| GO_BP_m1 | GO:003592 | rRNA import            | 3/2606    | 3/23843   | 0.001304 | 0.223588 | 0.212608 | Mrpl18/Pnj |
| GO_BP_m1 | GO:006030 | regulation of          | 3/2606    | 3/23843   | 0.001304 | 0.223588 | 0.212608 | Grem2/Il10 |
| GO_BP_m1 | GO:190560 | regulation of          | 3/2606    | 3/23843   | 0.001304 | 0.223588 | 0.212608 | Anxa2/Ldlr |
| GO_BP_m1 | GO:001605 | vesicle organization   | 52/2606   | 312/23843 | 0.001324 | 0.223588 | 0.212608 | Ankfy1/An  |

|                                       |           |          |          |          |             |
|---------------------------------------|-----------|----------|----------|----------|-------------|
| GO_BP_m1GO:005195negative re7/2606    | 17/23843  | 0.001331 | 0.223588 | 0.212608 | Abat/Adora  |
| GO_BP_m1GO:001083regulation 5/2606    | 9/23843   | 0.00134  | 0.223588 | 0.212608 | Pum3/Irfng, |
| GO_BP_m1GO:001063epithelial c45/2606  | 261/23843 | 0.001351 | 0.223588 | 0.212608 | Adam8/Ad    |
| GO_BP_m1GO:003033positive re76/2606   | 494/23843 | 0.00136  | 0.223588 | 0.212608 | Acta2/Ada   |
| GO_BP_m1GO:000301circulatory 73/2606  | 471/23843 | 0.001368 | 0.223588 | 0.212608 | Abat/Acta2  |
| GO_BP_m1GO:200123positive re33/2606   | 176/23843 | 0.001382 | 0.223588 | 0.212608 | Atf3/Bcap3  |
| GO_BP_m1GO:004354endothelial34/2606   | 183/23843 | 0.001389 | 0.223588 | 0.212608 | Adam8/Ad    |
| GO_BP_m1GO:190384regulation 21/2606   | 96/23843  | 0.001409 | 0.223588 | 0.212608 | Cav1/Cav3,  |
| GO_BP_m1GO:005134positive re76/2606   | 495/23843 | 0.001439 | 0.223588 | 0.212608 | Abl2/Adcy   |
| GO_BP_m1GO:004347regulation 6/2606    | 13/23843  | 0.001471 | 0.223588 | 0.212608 | Bpgm/Hsd    |
| GO_BP_m1GO:200105positive re26/2606   | 129/23843 | 0.001479 | 0.223588 | 0.212608 | Aifm1/Alox  |
| GO_BP_m1GO:007037ERK1 and E55/2606    | 336/23843 | 0.001495 | 0.223588 | 0.212608 | Abl2/Acta2  |
| GO_BP_m1GO:003367negative re42/2606   | 241/23843 | 0.001549 | 0.223588 | 0.212608 | Rtraf/Camk  |
| GO_BP_m1GO:004427cellular nitr68/2606 | 435/23843 | 0.001567 | 0.223588 | 0.212608 | Aifm1/Apo   |
| GO_BP_m1GO:009013epithelium 45/2606   | 263/23843 | 0.001581 | 0.223588 | 0.212608 | Adam8/Ad    |
| GO_BP_m1GO:000151RNA methy15/2606     | 60/23843  | 0.001631 | 0.223588 | 0.212608 | Virma/Cmt   |
| GO_BP_m1GO:001063positive re26/2606   | 130/23843 | 0.001661 | 0.223588 | 0.212608 | Adgra2/Alc  |
| GO_BP_m1GO:007037positive re42/2606   | 242/23843 | 0.001681 | 0.223588 | 0.212608 | Abl2/Acta2  |
| GO_BP_m1GO:000663neutral lipid24/2606 | 117/23843 | 0.001719 | 0.223588 | 0.212608 | Acsl1/Angp  |
| GO_BP_m1GO:001095positive re29/2606   | 151/23843 | 0.001791 | 0.223588 | 0.212608 | Aifm1/Alox  |
| GO_BP_m1GO:000761learning or46/2606   | 272/23843 | 0.0018   | 0.223588 | 0.212608 | Abl2/Adarr  |
| GO_BP_m1GO:000693vesicle bud13/2606   | 49/23843  | 0.001836 | 0.223588 | 0.212608 | Anxa2/Dnr   |
| GO_BP_m1GO:009013tissue migr45/2606   | 265/23843 | 0.001845 | 0.223588 | 0.212608 | Adam8/Ad    |
| GO_BP_m1GO:000663fatty acid n60/2606  | 377/23843 | 0.00187  | 0.223588 | 0.212608 | Abcd3/Abf   |
| GO_BP_m1GO:000196synaptic tra11/2606  | 38/23843  | 0.001897 | 0.223588 | 0.212608 | Adra1d/Cd   |
| GO_BP_m1GO:000697response tr61/2606   | 385/23843 | 0.00192  | 0.223588 | 0.212608 | Adnp2/Aifr  |
| GO_BP_m1GO:000153regulation 51/2606   | 310/23843 | 0.001944 | 0.223588 | 0.212608 | Abat/Ache,  |
| GO_BP_m1GO:200123positive re15/2606   | 61/23843  | 0.001947 | 0.223588 | 0.212608 | Atf3/Casp8  |
| GO_BP_m1GO:001968glyceralde7/2606     | 18/23843  | 0.001974 | 0.223588 | 0.212608 | Bpgm/Hsd    |
| GO_BP_m1GO:001583amine tran22/2606    | 105/23843 | 0.001977 | 0.223588 | 0.212608 | Abat/Adora  |
| GO_BP_m1GO:001404glutamate 10/2606    | 33/23843  | 0.002071 | 0.223588 | 0.212608 | Adora1/Av   |
| GO_BP_m1GO:001063regulation 37/2606   | 209/23843 | 0.002151 | 0.223588 | 0.212608 | Adamts9/A   |
| GO_BP_m1GO:003248negative re8/2606    | 23/23843  | 0.002179 | 0.223588 | 0.212608 | Cactin/Dhx  |
| GO_BP_m1GO:009011COPII-coat8/2606     | 23/23843  | 0.002179 | 0.223588 | 0.212608 | Mia3/Pdcd   |
| GO_BP_m1GO:199074cellular det9/2606   | 28/23843  | 0.002184 | 0.223588 | 0.212608 | Adh5/Cd36   |
| GO_BP_m1GO:001922cytokine-r59/2606    | 372/23843 | 0.002199 | 0.223588 | 0.212608 | Acsl1/Adip  |
| GO_BP_m1GO:009723cellular res29/2606  | 153/23843 | 0.002201 | 0.223588 | 0.212608 | Adh5/Bnip   |
| GO_BP_m1GO:000639tRNA meta31/2606     | 167/23843 | 0.00223  | 0.223588 | 0.212608 | 2210016F1   |
| GO_BP_m1GO:200024negative re15/2606   | 62/23843  | 0.002314 | 0.223588 | 0.212608 | Amh/Arhg    |
| GO_BP_m1GO:005105regulation 64/2606   | 411/23843 | 0.002318 | 0.223588 | 0.212608 | Aifm1/Anki  |
| GO_BP_m1GO:001923sensory pe26/2606    | 133/23843 | 0.002323 | 0.223588 | 0.212608 | Acpp/Ador   |
| GO_BP_m1GO:006054regulation 6/2606    | 14/23843  | 0.002337 | 0.223588 | 0.212608 | Bok/Casp8,  |
| GO_BP_m1GO:007088positive re6/2606    | 14/23843  | 0.002337 | 0.223588 | 0.212608 | Akap6/Cib:  |
| GO_BP_m1GO:010605positive re6/2606    | 14/23843  | 0.002337 | 0.223588 | 0.212608 | Akap6/Cib:  |
| GO_BP_m1GO:001605organic aci37/2606   | 210/23843 | 0.002342 | 0.223588 | 0.212608 | Abat/Abcd   |
| GO_BP_m1GO:004639carboxylic i37/2606  | 210/23843 | 0.002342 | 0.223588 | 0.212608 | Abat/Abcd   |
| GO_BP_m1GO:000007DNA dama22/2606      | 107/23843 | 0.002537 | 0.239667 | 0.227897 | Atr/Blm/Ba  |
| GO_BP_m1GO:005083synapse or54/2606    | 337/23843 | 0.002634 | 0.246095 | 0.23401  | Abl2/Ache,  |

|                                      |         |           |          |          |          |              |
|--------------------------------------|---------|-----------|----------|----------|----------|--------------|
| GO_BP_m1GO:001059positive regulation | 19/2606 | 88/23843  | 0.002718 | 0.251312 | 0.23897  | Adgra2/Alc   |
| GO_BP_m1GO:004390regulation          | 62/2606 | 399/23843 | 0.00282  | 0.251671 | 0.239312 | Anxa2/Arg    |
| GO_BP_m1GO:003466ncRNA metabolism    | 69/2606 | 453/23843 | 0.002822 | 0.251671 | 0.239312 | 2210016F1    |
| GO_BP_m1GO:004348regulation          | 18/2606 | 82/23843  | 0.002869 | 0.251671 | 0.239312 | Apobec1/C    |
| GO_BP_m1GO:004311receptor mediated   | 32/2606 | 177/23843 | 0.002946 | 0.251671 | 0.239312 | Ache/Adm.    |
| GO_BP_m1GO:000614purine nucleotide   | 8/2606  | 24/23843  | 0.002959 | 0.251671 | 0.239312 | Acpp/Aprt    |
| GO_BP_m1GO:001093regulation          | 8/2606  | 24/23843  | 0.002959 | 0.251671 | 0.239312 | Bnip3/Bok    |
| GO_BP_m1GO:003277positive regulation | 8/2606  | 24/23843  | 0.002959 | 0.251671 | 0.239312 | Gch1/Gdnf    |
| GO_BP_m1GO:001569organic cation      | 11/2606 | 40/23843  | 0.00297  | 0.251671 | 0.239312 | Abcb1a/Ac    |
| GO_BP_m1GO:000663acylglycerol        | 23/2606 | 115/23843 | 0.00298  | 0.251671 | 0.239312 | Acs1/Angp    |
| GO_BP_m1GO:000758response to         | 19/2606 | 89/23843  | 0.003109 | 0.258472 | 0.245779 | Arsb/Asph    |
| GO_BP_m1GO:007252purine-cytosine     | 73/2606 | 486/23843 | 0.003119 | 0.258472 | 0.245779 | Acpp/Adcy    |
| GO_BP_m1GO:000646negative regulation | 38/2606 | 221/23843 | 0.003193 | 0.260483 | 0.247691 | Rtraf/Camk   |
| GO_BP_m1GO:002240regulation          | 57/2606 | 363/23843 | 0.003226 | 0.260483 | 0.247691 | Abat/Abl2/   |
| GO_BP_m1GO:005090leukocyte           | 50/2606 | 310/23843 | 0.003232 | 0.260483 | 0.247691 | Adam8/Ad     |
| GO_BP_m1GO:000664triglyceride        | 20/2606 | 96/23843  | 0.003313 | 0.262326 | 0.249444 | Acs1/Angp    |
| GO_BP_m1GO:005134negative regulation | 45/2606 | 273/23843 | 0.00332  | 0.262326 | 0.249444 | Rtraf/Camk   |
| GO_BP_m1GO:005089cognition           | 49/2606 | 303/23843 | 0.003345 | 0.262326 | 0.249444 | Abl2/Adar    |
| GO_BP_m1GO:004670heterocycle         | 67/2606 | 441/23843 | 0.00342  | 0.265816 | 0.252762 | Aifm1/Aldf   |
| GO_BP_m1GO:005170interaction         | 17/2606 | 77/23843  | 0.003476 | 0.267828 | 0.254676 | Anxa2/Arg    |
| GO_BP_m1GO:000609pentose-phosphate   | 6/2606  | 15/23843  | 0.003538 | 0.267914 | 0.254758 | Bpgm/Hsd     |
| GO_BP_m1GO:200019regulation          | 6/2606  | 15/23843  | 0.003538 | 0.267914 | 0.254758 | Amh/Hyal     |
| GO_BP_m1GO:003225methylation         | 52/2606 | 327/23843 | 0.003656 | 0.2732   | 0.259783 | Virma/643    |
| GO_BP_m1GO:003465nucleobase          | 61/2606 | 396/23843 | 0.0037   | 0.2732   | 0.259783 | Aifm1/Apo    |
| GO_BP_m1GO:004820vesicle targeting   | 4/2606  | 7/23843   | 0.003794 | 0.2732   | 0.259783 | Pdcd6/Pret   |
| GO_BP_m1GO:004820COPII vesicle       | 4/2606  | 7/23843   | 0.003794 | 0.2732   | 0.259783 | Pdcd6/Pret   |
| GO_BP_m1GO:190185regulation          | 4/2606  | 7/23843   | 0.003794 | 0.2732   | 0.259783 | Fln/Lig3/F   |
| GO_BP_m1GO:200024regulation          | 30/2606 | 166/23843 | 0.003923 | 0.2732   | 0.259783 | Amh/Arhg     |
| GO_BP_m1GO:190403negative regulation | 8/2606  | 25/23843  | 0.003939 | 0.2732   | 0.259783 | Camk2n1/C    |
| GO_BP_m1GO:001059regulation          | 27/2606 | 145/23843 | 0.003948 | 0.2732   | 0.259783 | Adamts9/A    |
| GO_BP_m1GO:005115glucose 6-phosphate | 7/2606  | 20/23843  | 0.003951 | 0.2732   | 0.259783 | Bpgm/G6p     |
| GO_BP_m1GO:000193negative regulation | 63/2606 | 413/23843 | 0.004036 | 0.2732   | 0.259783 | Rtraf/Atf3/I |
| GO_BP_m1GO:000176membrane            | 5/2606  | 11/23843  | 0.004071 | 0.2732   | 0.259783 | Anxa2/Cav    |
| GO_BP_m1GO:000690vesicle coat        | 5/2606  | 11/23843  | 0.004071 | 0.2732   | 0.259783 | Gbf1/Pdcd    |
| GO_BP_m1GO:190116regulation          | 5/2606  | 11/23843  | 0.004071 | 0.2732   | 0.259783 | Arhgdib/Ca   |
| GO_BP_m1GO:190329regulation          | 5/2606  | 11/23843  | 0.004071 | 0.2732   | 0.259783 | Cox11/Fox    |
| GO_BP_m1GO:004648glycerolipid        | 49/2606 | 306/23843 | 0.004074 | 0.2732   | 0.259783 | Tmem269/     |
| GO_BP_m1GO:005068regulation          | 16/2606 | 72/23843  | 0.004211 | 0.278313 | 0.264645 | Ddx60/Dhx    |
| GO_BP_m1GO:000152angiogenesis        | 73/2606 | 492/23843 | 0.004241 | 0.278313 | 0.264645 | Adam8/Ad     |
| GO_BP_m1GO:004639carboxylic acid     | 53/2606 | 337/23843 | 0.004246 | 0.278313 | 0.264645 | Abat/Abcd    |
| GO_BP_m1GO:006101regulation          | 21/2606 | 105/23843 | 0.004414 | 0.287192 | 0.273089 | Apobec1/B    |
| GO_BP_m1GO:001605organic acid        | 53/2606 | 338/23843 | 0.004513 | 0.288197 | 0.274044 | Abat/Abcd    |
| GO_BP_m1GO:190353negative regulation | 36/2606 | 211/23843 | 0.004578 | 0.288197 | 0.274044 | Abat/Ador    |
| GO_BP_m1GO:000647protein AD          | 9/2606  | 31/23843  | 0.004715 | 0.288197 | 0.274044 | Art1/Art5/F  |
| GO_BP_m1GO:001943aromatic carbon     | 68/2606 | 455/23843 | 0.004751 | 0.288197 | 0.274044 | Aifm1/Apo    |
| GO_BP_m1GO:000684pyruvate            | 3/2606  | 4/23843   | 0.00479  | 0.288197 | 0.274044 | Mpc2/Myc     |
| GO_BP_m1GO:001405negative regulation | 3/2606  | 4/23843   | 0.00479  | 0.288197 | 0.274044 | Abat/Hrh3,   |
| GO_BP_m1GO:003111positive regulation | 3/2606  | 4/23843   | 0.00479  | 0.288197 | 0.274044 | Htr1a/Stmr   |

|                                        |           |          |          |          |             |
|----------------------------------------|-----------|----------|----------|----------|-------------|
| GO_BP_m1GO:004241epinephrin 3/2606     | 4/23843   | 0.00479  | 0.288197 | 0.274044 | Pnmt/Rnls/  |
| GO_BP_m1GO:004362cortical mic 3/2606   | 4/23843   | 0.00479  | 0.288197 | 0.274044 | Ezr/Pafah1  |
| GO_BP_m1GO:006024negative re 3/2606    | 4/23843   | 0.00479  | 0.288197 | 0.274044 | Dach1/Pak   |
| GO_BP_m1GO:19039Cregulation 3/2606     | 4/23843   | 0.00479  | 0.288197 | 0.274044 | Dock8/Flot  |
| GO_BP_m1GO:000664phospholip 52/2606    | 332/23843 | 0.004984 | 0.297841 | 0.283214 | Tmem269/    |
| GO_BP_m1GO:000762copulation 8/2606     | 26/23843  | 0.005153 | 0.302199 | 0.287359 | Abat/Avpr1  |
| GO_BP_m1GO:00434Eregulation 8/2606     | 26/23843  | 0.005153 | 0.302199 | 0.287359 | Bnip3/Cdk.  |
| GO_BP_m1GO:00434Eregulation 19/2606    | 93/23843  | 0.00517  | 0.302199 | 0.287359 | Apobec1/C   |
| GO_BP_m1GO:000194postsynapt 10/2606    | 37/23843  | 0.005195 | 0.302199 | 0.287359 | Cdh2/Gdnf   |
| GO_BP_m1GO:003162receptor in 20/2606   | 100/23843 | 0.005378 | 0.310804 | 0.295541 | Ache/Adm.   |
| GO_BP_m1GO:001587dopamine 12/2606      | 49/23843  | 0.005511 | 0.315962 | 0.300446 | Abat/Adra.  |
| GO_BP_m1GO:00515Eregulation 21/2606    | 107/23843 | 0.005539 | 0.315962 | 0.300446 | Abat/Arl6ip |
| GO_BP_m1GO:003157DNA integri 22/2606   | 114/23843 | 0.005658 | 0.320653 | 0.304907 | Atr/Blm/Ba  |
| GO_BP_m1GO:00995Csynaptic ve 25/2606   | 135/23843 | 0.005806 | 0.322011 | 0.306198 | Ap1s2/Can   |
| GO_BP_m1GO:00001ErRNA modi 9/2606      | 32/23843  | 0.005934 | 0.322011 | 0.306198 | Ftsj3/Gm1E  |
| GO_BP_m1GO:00519Eregulation 20/2606    | 101/23843 | 0.006033 | 0.322011 | 0.306198 | Abat/Adora  |
| GO_BP_m1GO:00090Ecellular am 18/2606   | 88/23843  | 0.006305 | 0.322011 | 0.306198 | Abat/Aldh4  |
| GO_BP_m1GO:00605E muscle tiss 66/2606  | 445/23843 | 0.006353 | 0.322011 | 0.306198 | Acta1/Adar  |
| GO_BP_m1GO:00000Eregulation 5/2606     | 12/23843  | 0.006356 | 0.322011 | 0.306198 | E2f1/E2f7/f |
| GO_BP_m1GO:006054negative re 5/2606    | 12/23843  | 0.006356 | 0.322011 | 0.306198 | Bok/Casp8.  |
| GO_BP_m1GO:006117negative re 5/2606    | 12/23843  | 0.006356 | 0.322011 | 0.306198 | Fkbp1b/Jaç  |
| GO_BP_m1GO:00614E trophoblas 5/2606    | 12/23843  | 0.006356 | 0.322011 | 0.306198 | Arhgdib/Ca  |
| GO_BP_m1GO:00972C activation c 5/2606  | 12/23843  | 0.006356 | 0.322011 | 0.306198 | Asph/Casp   |
| GO_BP_m1GO:000727synaptic tra 10/2606  | 38/23843  | 0.006373 | 0.322011 | 0.306198 | Chrm1/Chr   |
| GO_BP_m1GO:000007cell cycle cl 31/2606 | 179/23843 | 0.006493 | 0.322011 | 0.306198 | Atr/Blm/Ba  |
| GO_BP_m1GO:00513E positive re 11/2606  | 44/23843  | 0.006552 | 0.322011 | 0.306198 | Abl2/Gch1,  |
| GO_BP_m1GO:00067Ecoenzyme 48/2606      | 306/23843 | 0.006575 | 0.322011 | 0.306198 | Acot1/Acoi  |
| GO_BP_m1GO:00447E modulator 8/2606     | 27/23843  | 0.006633 | 0.322011 | 0.306198 | Cfl1/Fmr1/  |
| GO_BP_m1GO:00717C membrane 8/2606      | 27/23843  | 0.006633 | 0.322011 | 0.306198 | Anxa2/Cav   |
| GO_BP_m1GO:009907regulation 8/2606     | 27/23843  | 0.006633 | 0.322011 | 0.306198 | Arhgap44/   |
| GO_BP_m1GO:00062E DNA repair 65/2606   | 438/23843 | 0.006635 | 0.322011 | 0.306198 | Aplf/Aptx,/ |
| GO_BP_m1GO:00335E unsaturate 20/2606   | 102/23843 | 0.006752 | 0.322011 | 0.306198 | Akr1c12/Al  |
| GO_BP_m1GO:00060E cellular ald 15/2606 | 69/23843  | 0.006793 | 0.322011 | 0.306198 | Adh1/AdhE   |
| GO_BP_m1GO:000741synapse as 28/2606    | 158/23843 | 0.006834 | 0.322011 | 0.306198 | Ache/Cadn   |
| GO_BP_m1GO:00092E cobalamin 4/2606     | 8/23843   | 0.006933 | 0.322011 | 0.306198 | Clybl/Gif/V |
| GO_BP_m1GO:003237regulation 4/2606     | 8/23843   | 0.006933 | 0.322011 | 0.306198 | Anxa2/Ldlr  |
| GO_BP_m1GO:00323Eregulation 4/2606     | 8/23843   | 0.006933 | 0.322011 | 0.306198 | Anxa2/Ldlr  |
| GO_BP_m1GO:00323Eregulation 4/2606     | 8/23843   | 0.006933 | 0.322011 | 0.306198 | Anxa2/Ldlr  |
| GO_BP_m1GO:005177response tr 4/2606    | 8/23843   | 0.006933 | 0.322011 | 0.306198 | Adh5/Arntl  |
| GO_BP_m1GO:006024contact inh 4/2606    | 8/23843   | 0.006933 | 0.322011 | 0.306198 | Dach1/Pak   |
| GO_BP_m1GO:200002positive re 4/2606    | 8/23843   | 0.006933 | 0.322011 | 0.306198 | Dmrt1/Nr5   |
| GO_BP_m1GO:200054positive re 4/2606    | 8/23843   | 0.006933 | 0.322011 | 0.306198 | Foxa2/Osr1  |
| GO_BP_m1GO:190134negative re 22/2606   | 116/23843 | 0.006983 | 0.322011 | 0.306198 | Adamts1/A   |
| GO_BP_m1GO:00109E positive re 26/2606  | 144/23843 | 0.006985 | 0.322011 | 0.306198 | Aifm1/Alox  |
| GO_BP_m1GO:00072E neurotrans 25/2606   | 137/23843 | 0.007029 | 0.322011 | 0.306198 | Camk2a/Fr   |
| GO_BP_m1GO:009964signal rele 25/2606   | 137/23843 | 0.007029 | 0.322011 | 0.306198 | Camk2a/Fr   |
| GO_BP_m1GO:004232negative re 67/2606   | 455/23843 | 0.007061 | 0.322011 | 0.306198 | Rtraf/Atf3/ |
| GO_BP_m1GO:00705E response tr 18/2606  | 89/23843  | 0.007115 | 0.322011 | 0.306198 | Ankrd1/Ca   |

|          |           |              |         |           |          |          |          |             |
|----------|-----------|--------------|---------|-----------|----------|----------|----------|-------------|
| GO_BP_m1 | GO:005104 | regulation   | 7/2606  | 22/23843  | 0.00715  | 0.322011 | 0.306198 | Adam8/Irfn  |
| GO_BP_m1 | GO:000639 | mitochond    | 6/2606  | 17/23843  | 0.007222 | 0.322011 | 0.306198 | Gm1818/M    |
| GO_BP_m1 | GO:003319 | response to  | 6/2606  | 17/23843  | 0.007222 | 0.322011 | 0.306198 | Cd36/Dapf   |
| GO_BP_m1 | GO:006054 | negative re  | 6/2606  | 17/23843  | 0.007222 | 0.322011 | 0.306198 | Bok/Casp8   |
| GO_BP_m1 | GO:001473 | striated m   | 63/2606 | 424/23843 | 0.007238 | 0.322011 | 0.306198 | Acta1/Ada   |
| GO_BP_m1 | GO:000689 | receptor-n   | 33/2606 | 195/23843 | 0.007267 | 0.322011 | 0.306198 | Ache/Adm    |
| GO_BP_m1 | GO:000683 | dicarboxyli  | 16/2606 | 76/23843  | 0.007295 | 0.322011 | 0.306198 | Abat/Adora  |
| GO_BP_m1 | GO:000697 | response to  | 16/2606 | 76/23843  | 0.007295 | 0.322011 | 0.306198 | Abcb1a/Ap   |
| GO_BP_m1 | GO:005193 | catecholam   | 16/2606 | 76/23843  | 0.007295 | 0.322011 | 0.306198 | Abat/Adra   |
| GO_BP_m1 | GO:004819 | Golgi vesic  | 9/2606  | 33/23843  | 0.007383 | 0.322661 | 0.306816 | Gbf1/Mia3   |
| GO_BP_m1 | GO:005195 | negative re  | 9/2606  | 33/23843  | 0.007383 | 0.322661 | 0.306816 | Abat/Adora  |
| GO_BP_m1 | GO:001583 | acidic amin  | 13/2606 | 57/23843  | 0.007489 | 0.325646 | 0.309654 | Abat/Adora  |
| GO_BP_m1 | GO:005144 | regulation   | 12/2606 | 51/23843  | 0.007726 | 0.330015 | 0.313809 | Calr/Cdc20  |
| GO_BP_m1 | GO:190352 | negative re  | 10/2606 | 39/23843  | 0.007748 | 0.330015 | 0.313809 | Adm/Adora   |
| GO_BP_m1 | GO:005087 | brown fat c  | 11/2606 | 45/23843  | 0.007834 | 0.330015 | 0.313809 | Adig/Arl4a  |
| GO_BP_m1 | GO:005195 | regulation   | 11/2606 | 45/23843  | 0.007834 | 0.330015 | 0.313809 | Abat/Adora  |
| GO_BP_m1 | GO:003249 | response to  | 55/2606 | 363/23843 | 0.007844 | 0.330015 | 0.313809 | Adh5/Adm    |
| GO_BP_m1 | GO:007259 | reactive ox  | 41/2606 | 256/23843 | 0.008031 | 0.330015 | 0.313809 | 5730559C1   |
| GO_BP_m1 | GO:001813 | peptidyl-s   | 50/2606 | 325/23843 | 0.008168 | 0.330015 | 0.313809 | Atp2b4/Atr  |
| GO_BP_m1 | GO:003526 | organ grow   | 31/2606 | 182/23843 | 0.008261 | 0.330015 | 0.313809 | Akap6/Arx   |
| GO_BP_m1 | GO:001094 | negative re  | 36/2606 | 219/23843 | 0.008315 | 0.330015 | 0.313809 | Blm/Baban   |
| GO_BP_m1 | GO:009953 | presynaptic  | 26/2606 | 146/23843 | 0.008363 | 0.330015 | 0.313809 | Camk2a/Fr   |
| GO_BP_m1 | GO:005135 | negative re  | 8/2606  | 28/23843  | 0.008412 | 0.330015 | 0.313809 | Aoc3/Atp2   |
| GO_BP_m1 | GO:190304 | meiotic cel  | 33/2606 | 197/23843 | 0.008461 | 0.330015 | 0.313809 | Btbd18/Cal  |
| GO_BP_m1 | GO:000627 | regulation   | 22/2606 | 118/23843 | 0.00855  | 0.330015 | 0.313809 | Atr/Blm/Ca  |
| GO_BP_m1 | GO:190352 | regulation   | 37/2606 | 227/23843 | 0.008632 | 0.330015 | 0.313809 | Adm/Adora   |
| GO_BP_m1 | GO:190379 | negative re  | 9/2606  | 34/23843  | 0.009087 | 0.330015 | 0.313809 | Abat/Adora  |
| GO_BP_m1 | GO:005189 | regulation   | 25/2606 | 140/23843 | 0.009254 | 0.330015 | 0.313809 | Adam8/C1    |
| GO_BP_m1 | GO:003157 | membrane     | 7/2606  | 23/23843  | 0.009326 | 0.330015 | 0.313809 | Anxa2/Cav   |
| GO_BP_m1 | GO:003581 | regulation   | 7/2606  | 23/23843  | 0.009326 | 0.330015 | 0.313809 | Adora1/Av   |
| GO_BP_m1 | GO:004573 | negative re  | 7/2606  | 23/23843  | 0.009326 | 0.330015 | 0.313809 | Cdkn1a/He   |
| GO_BP_m1 | GO:009886 | cellular ox  | 7/2606  | 23/23843  | 0.009326 | 0.330015 | 0.313809 | Cd36/Fbln   |
| GO_BP_m1 | GO:000911 | nucleobase   | 10/2606 | 40/23843  | 0.00934  | 0.330015 | 0.313809 | Acpp/Aprt   |
| GO_BP_m1 | GO:000705 | spindle org  | 29/2606 | 169/23843 | 0.009378 | 0.330015 | 0.313809 | Ankrd53/Br  |
| GO_BP_m1 | GO:003134 | positive re  | 48/2606 | 312/23843 | 0.009395 | 0.330015 | 0.313809 | 5730559C1   |
| GO_BP_m1 | GO:007128 | cellular res | 5/2606  | 13/23843  | 0.009409 | 0.330015 | 0.313809 | Aoc1/Atp7   |
| GO_BP_m1 | GO:000268 | regulation   | 31/2606 | 184/23843 | 0.009647 | 0.330015 | 0.313809 | Adam8/Ad    |
| GO_BP_m1 | GO:000693 | vesicle fusi | 26/2606 | 148/23843 | 0.009957 | 0.330015 | 0.313809 | Ankfy1/An   |
| GO_BP_m1 | GO:004576 | regulation   | 45/2606 | 290/23843 | 0.010015 | 0.330015 | 0.313809 | Adamts1/A   |
| GO_BP_m1 | GO:000167 | long-chain   | 18/2606 | 92/23843  | 0.010062 | 0.330015 | 0.313809 | Acot1/Aco   |
| GO_BP_m1 | GO:003051 | negative re  | 13/2606 | 59/23843  | 0.010079 | 0.330015 | 0.313809 | Cav1/Danc   |
| GO_BP_m1 | GO:009881 | nuclear chr  | 40/2606 | 252/23843 | 0.010123 | 0.330015 | 0.313809 | Ankrd53/Te  |
| GO_BP_m1 | GO:005185 | modificatio  | 15/2606 | 72/23843  | 0.010142 | 0.330015 | 0.313809 | Anxa2/Arg   |
| GO_BP_m1 | GO:001823 | peptidyl-s   | 54/2606 | 360/23843 | 0.010154 | 0.330015 | 0.313809 | Atp2b4/Atr  |
| GO_BP_m1 | GO:001939 | fatty acid o | 19/2606 | 99/23843  | 0.010248 | 0.330015 | 0.313809 | Abcd3/Aca   |
| GO_BP_m1 | GO:001652 | negative re  | 20/2606 | 106/23843 | 0.010358 | 0.330015 | 0.313809 | Adamts1/A   |
| GO_BP_m1 | GO:004887 | homeostas    | 47/2606 | 306/23843 | 0.010374 | 0.330015 | 0.313809 | Asxl1/Bcr/E |
| GO_BP_m1 | GO:007053 | regulation   | 31/2606 | 185/23843 | 0.010408 | 0.330015 | 0.313809 | Ankrd53/Br  |

|                                |         |           |          |          |          |              |
|--------------------------------|---------|-----------|----------|----------|----------|--------------|
| GO_BP_m1GO:00069C vesicle targ | 8/2606  | 29/23843  | 0.010526 | 0.330015 | 0.313809 | Gbf1/Map4    |
| GO_BP_m1GO:00086E phospholip   | 27/2606 | 156/23843 | 0.010629 | 0.330015 | 0.313809 | Tmem269/     |
| GO_BP_m1GO:00305E leukocyte c  | 32/2606 | 193/23843 | 0.010886 | 0.330015 | 0.313809 | Adam8/Cal    |
| GO_BP_m1GO:00511E regulation   | 11/2606 | 47/23843  | 0.010973 | 0.330015 | 0.313809 | Bpgm/Coq     |
| GO_BP_m1GO:00192E transmissio  | 17/2606 | 86/23843  | 0.010987 | 0.330015 | 0.313809 | Ahnak2/Av    |
| GO_BP_m1GO:00062E base-excisi  | 3/2606  | 5/23843   | 0.011001 | 0.330015 | 0.313809 | Pcna/Pole/   |
| GO_BP_m1GO:00157E lactate tran | 3/2606  | 5/23843   | 0.011001 | 0.330015 | 0.313809 | Myc/Slc16a   |
| GO_BP_m1GO:00161E synaptic ve  | 3/2606  | 5/23843   | 0.011001 | 0.330015 | 0.313809 | Dnajc6/Shc   |
| GO_BP_m1GO:00217E amygdala c   | 3/2606  | 5/23843   | 0.011001 | 0.330015 | 0.313809 | Nf1/Pak1/7   |
| GO_BP_m1GO:00331E negative re  | 3/2606  | 5/23843   | 0.011001 | 0.330015 | 0.313809 | Cox11/Foxo   |
| GO_BP_m1GO:00358E lactate tran | 3/2606  | 5/23843   | 0.011001 | 0.330015 | 0.313809 | Myc/Slc16a   |
| GO_BP_m1GO:00358E plasma me    | 3/2606  | 5/23843   | 0.011001 | 0.330015 | 0.313809 | Myc/Slc16a   |
| GO_BP_m1GO:00359E RNA impor    | 3/2606  | 5/23843   | 0.011001 | 0.330015 | 0.313809 | Mrpl18/Pnj   |
| GO_BP_m1GO:00359E positive re  | 3/2606  | 5/23843   | 0.011001 | 0.330015 | 0.313809 | Kat2a/Kat2   |
| GO_BP_m1GO:00458E negative re  | 3/2606  | 5/23843   | 0.011001 | 0.330015 | 0.313809 | Naa10/Tnk    |
| GO_BP_m1GO:00714E cellular res | 3/2606  | 5/23843   | 0.011001 | 0.330015 | 0.313809 | Ei24/Polh/F  |
| GO_BP_m1GO:00901E receptor-n   | 3/2606  | 5/23843   | 0.011001 | 0.330015 | 0.313809 | Anxa2/Ldlr   |
| GO_BP_m1GO:19011E negative re  | 3/2606  | 5/23843   | 0.011001 | 0.330015 | 0.313809 | Arhgdib/Ca   |
| GO_BP_m1GO:19033E negative re  | 3/2606  | 5/23843   | 0.011001 | 0.330015 | 0.313809 | Cox11/Foxo   |
| GO_BP_m1GO:19037E negative re  | 3/2606  | 5/23843   | 0.011001 | 0.330015 | 0.313809 | Ezr/Hsph1/   |
| GO_BP_m1GO:00102E response tr  | 23/2606 | 128/23843 | 0.011332 | 0.330015 | 0.313809 | Apobec1/A    |
| GO_BP_m1GO:00030E regulation   | 4/2606  | 9/23843   | 0.011408 | 0.330015 | 0.313809 | Chrm1/Chr    |
| GO_BP_m1GO:00067E cholesterol  | 4/2606  | 9/23843   | 0.011408 | 0.330015 | 0.313809 | Cyp46a1/H    |
| GO_BP_m1GO:00140E negative re  | 4/2606  | 9/23843   | 0.011408 | 0.330015 | 0.313809 | Adora1/Hrl   |
| GO_BP_m1GO:00161E sterol cata  | 4/2606  | 9/23843   | 0.011408 | 0.330015 | 0.313809 | Cyp46a1/H    |
| GO_BP_m1GO:00340E endosomal    | 4/2606  | 9/23843   | 0.011408 | 0.330015 | 0.313809 | Ankfy1/Rbs   |
| GO_BP_m1GO:00485E regulation   | 4/2606  | 9/23843   | 0.011408 | 0.330015 | 0.313809 | Ankfy1/Cav   |
| GO_BP_m1GO:00512E spindle elo  | 4/2606  | 9/23843   | 0.011408 | 0.330015 | 0.313809 | Kif23/Kif4/I |
| GO_BP_m1GO:00718E response tr  | 4/2606  | 9/23843   | 0.011408 | 0.330015 | 0.313809 | Akap6/Atp    |
| GO_BP_m1GO:00718E cellular res | 4/2606  | 9/23843   | 0.011408 | 0.330015 | 0.313809 | Akap6/Atp    |
| GO_BP_m1GO:00989E receptor di  | 4/2606  | 9/23843   | 0.011408 | 0.330015 | 0.313809 | Cacng5/Ca    |
| GO_BP_m1GO:00989E postsynapt   | 4/2606  | 9/23843   | 0.011408 | 0.330015 | 0.313809 | Cacng5/Ca    |
| GO_BP_m1GO:00996E neurotrans   | 4/2606  | 9/23843   | 0.011408 | 0.330015 | 0.313809 | Cacng5/Ca    |
| GO_BP_m1GO:20001E regulation   | 4/2606  | 9/23843   | 0.011408 | 0.330015 | 0.313809 | Cd36/Fbln5   |
| GO_BP_m1GO:00510E negative re  | 38/2606 | 239/23843 | 0.011642 | 0.330015 | 0.313809 | Abat/Adora   |
| GO_BP_m1GO:19013E regulation   | 48/2606 | 316/23843 | 0.011788 | 0.330015 | 0.313809 | Adamts1/A    |
| GO_BP_m1GO:00008E regulation   | 2/2606  | 2/23843   | 0.011942 | 0.330015 | 0.313809 | Atp2b4/Slc   |
| GO_BP_m1GO:00062E uracil cata  | 2/2606  | 2/23843   | 0.011942 | 0.330015 | 0.313809 | Dpyd/Dpys    |
| GO_BP_m1GO:00065E phosphage    | 2/2606  | 2/23843   | 0.011942 | 0.330015 | 0.313809 | Ckm/Ckmt.    |
| GO_BP_m1GO:00066E phosphocr    | 2/2606  | 2/23843   | 0.011942 | 0.330015 | 0.313809 | Ckm/Ckmt.    |
| GO_BP_m1GO:00072E osmosensc    | 2/2606  | 2/23843   | 0.011942 | 0.330015 | 0.313809 | Osr1/Trpv4   |
| GO_BP_m1GO:00096E response tr  | 2/2606  | 2/23843   | 0.011942 | 0.330015 | 0.313809 | Gpx1/Gpx2    |
| GO_BP_m1GO:00096E response tr  | 2/2606  | 2/23843   | 0.011942 | 0.330015 | 0.313809 | Gpx1/Gpx2    |
| GO_BP_m1GO:00157E myo-inosit   | 2/2606  | 2/23843   | 0.011942 | 0.330015 | 0.313809 | Pgap1/Slc5   |
| GO_BP_m1GO:00171E N-terminal   | 2/2606  | 2/23843   | 0.011942 | 0.330015 | 0.313809 | Naa10/Naa    |
| GO_BP_m1GO:00180E N-terminal   | 2/2606  | 2/23843   | 0.011942 | 0.330015 | 0.313809 | Naa10/Naa    |
| GO_BP_m1GO:00192E glucose 1-   | 2/2606  | 2/23843   | 0.011942 | 0.330015 | 0.313809 | Pgm3/Ugp     |
| GO_BP_m1GO:00309E peptidyl-sc  | 2/2606  | 2/23843   | 0.011942 | 0.330015 | 0.313809 | Naa10/Naa    |

|                                       |           |          |          |          |             |
|---------------------------------------|-----------|----------|----------|----------|-------------|
| GO_BP_m1GO:003224negative re2/2606    | 2/23843   | 0.011942 | 0.330015 | 0.313809 | Nup153/Tp   |
| GO_BP_m1GO:003229positive reç2/2606   | 2/23843   | 0.011942 | 0.330015 | 0.313809 | Cdk2/Ciz1   |
| GO_BP_m1GO:004241epinephrin 2/2606    | 2/23843   | 0.011942 | 0.330015 | 0.313809 | Pnmt/Th     |
| GO_BP_m1GO:004341homocyste 2/2606     | 2/23843   | 0.011942 | 0.330015 | 0.313809 | Blmh/Mtrr   |
| GO_BP_m1GO:004629formaldehy2/2606     | 2/23843   | 0.011942 | 0.330015 | 0.313809 | Adh5/Esd    |
| GO_BP_m1GO:004689negative re2/2606    | 2/23843   | 0.011942 | 0.330015 | 0.313809 | Nup153/Tp   |
| GO_BP_m1GO:004821Golgi vesic 2/2606   | 2/23843   | 0.011942 | 0.330015 | 0.313809 | Cog4/Dnaj   |
| GO_BP_m1GO:005141response tr2/2606    | 2/23843   | 0.011942 | 0.330015 | 0.313809 | Htr7/Npas   |
| GO_BP_m1GO:005187lateral elen2/2606   | 2/23843   | 0.011942 | 0.330015 | 0.313809 | Sycp1/Sycp  |
| GO_BP_m1GO:00603Cnegative re2/2606    | 2/23843   | 0.011942 | 0.330015 | 0.313809 | Il10/Nog    |
| GO_BP_m1GO:006159gamma-an2/2606       | 2/23843   | 0.011942 | 0.330015 | 0.313809 | Nf1/Pak1    |
| GO_BP_m1GO:007016positive reç2/2606   | 2/23843   | 0.011942 | 0.330015 | 0.313809 | C1qtnf3/Hc  |
| GO_BP_m1GO:007127cellular resj2/2606  | 2/23843   | 0.011942 | 0.330015 | 0.313809 | Bnip3/Tiga  |
| GO_BP_m1GO:007216posterior n2/2606    | 2/23843   | 0.011942 | 0.330015 | 0.313809 | Osr1/Wt1    |
| GO_BP_m1GO:007218metaneph 2/2606      | 2/23843   | 0.011942 | 0.330015 | 0.313809 | Myc/Osr1    |
| GO_BP_m1GO:007218metaneph 2/2606      | 2/23843   | 0.011942 | 0.330015 | 0.313809 | Myc/Osr1    |
| GO_BP_m1GO:007259tumor necr2/2606     | 2/23843   | 0.011942 | 0.330015 | 0.313809 | Adam8/Ifn   |
| GO_BP_m1GO:009009metaneph 2/2606      | 2/23843   | 0.011942 | 0.330015 | 0.313809 | Myc/Osr1    |
| GO_BP_m1GO:190208negative re2/2606    | 2/23843   | 0.011942 | 0.330015 | 0.313809 | Hrc/Mrln    |
| GO_BP_m1GO:190228negative re2/2606    | 2/23843   | 0.011942 | 0.330015 | 0.313809 | Aoc3/Park2  |
| GO_BP_m1GO:19039Cpositive reç2/2606   | 2/23843   | 0.011942 | 0.330015 | 0.313809 | Dock8/Flot  |
| GO_BP_m1GO:190497regulation 2/2606    | 2/23843   | 0.011942 | 0.330015 | 0.313809 | Park2/Synj  |
| GO_BP_m1GO:190559regulation 2/2606    | 2/23843   | 0.011942 | 0.330015 | 0.313809 | Anxa2/Pcsk  |
| GO_BP_m1GO:19056Cpositive reç2/2606   | 2/23843   | 0.011942 | 0.330015 | 0.313809 | Anxa2/Ldlr  |
| GO_BP_m1GO:20003Cregulation 2/2606    | 2/23843   | 0.011942 | 0.330015 | 0.313809 | Adam8/Ifn   |
| GO_BP_m1GO:20003Cpositive reç2/2606   | 2/23843   | 0.011942 | 0.330015 | 0.313809 | Adam8/Ifn   |
| GO_BP_m1GO:20003Enegative re2/2606    | 2/23843   | 0.011942 | 0.330015 | 0.313809 | Amh/Hyal3   |
| GO_BP_m1GO:200062regulation 2/2606    | 2/23843   | 0.011942 | 0.330015 | 0.313809 | Pnpt1/Zc3f  |
| GO_BP_m1GO:200062positive reç2/2606   | 2/23843   | 0.011942 | 0.330015 | 0.313809 | Pnpt1/Zc3f  |
| GO_BP_m1GO:001404regulation 7/2606    | 24/23843  | 0.011947 | 0.330015 | 0.313809 | Adora1/Av   |
| GO_BP_m1GO:003581renal sodiu7/2606    | 24/23843  | 0.011947 | 0.330015 | 0.313809 | Adora1/Av   |
| GO_BP_m1GO:190599regulation 7/2606    | 24/23843  | 0.011947 | 0.330015 | 0.313809 | Amh/Dmrt    |
| GO_BP_m1GO:000652cellular am42/2606   | 270/23843 | 0.012004 | 0.330548 | 0.314315 | Dglucy/Abi  |
| GO_BP_m1GO:004578positive reç56/2606  | 379/23843 | 0.012046 | 0.33065  | 0.314413 | Adam8/Ad    |
| GO_BP_m1GO:000706sister chr12/2606    | 54/23843  | 0.012289 | 0.335242 | 0.318779 | Cdc20/Escc  |
| GO_BP_m1GO:003646synaptic ve12/2606   | 54/23843  | 0.012289 | 0.335242 | 0.318779 | Ap1s2/Can   |
| GO_BP_m1GO:00064CtRNA modi14/2606     | 67/23843  | 0.012413 | 0.336518 | 0.319992 | 2210016F1   |
| GO_BP_m1GO:009917regulation 14/2606   | 67/23843  | 0.012413 | 0.336518 | 0.319992 | Arhgap44/   |
| GO_BP_m1GO:001076regulation 48/2606   | 317/23843 | 0.012458 | 0.336719 | 0.320183 | Aatk/Ache/  |
| GO_BP_m1GO:000716negative re41/2606   | 263/23843 | 0.012498 | 0.336753 | 0.320216 | Abat/Abl2/  |
| GO_BP_m1GO:003444lipid oxidat19/2606  | 101/23843 | 0.012632 | 0.339324 | 0.322661 | Abcd3/Aca   |
| GO_BP_m1GO:006201regulation 59/2606   | 404/23843 | 0.012838 | 0.343459 | 0.326592 | Adcyap1r1.  |
| GO_BP_m1GO:190002regulation 11/2606   | 48/23843  | 0.012864 | 0.343459 | 0.326592 | Bcar1/Calr/ |
| GO_BP_m1GO:00324Cregulation 40/2606   | 256/23843 | 0.013009 | 0.344347 | 0.327437 | Abcb1a/Ac   |
| GO_BP_m1GO:006102membrane 35/2606     | 218/23843 | 0.013012 | 0.344347 | 0.327437 | Adam8/An    |
| GO_BP_m1GO:004678microtubul15/2606    | 74/23843  | 0.013015 | 0.344347 | 0.327437 | Ankrd53/C   |
| GO_BP_m1GO:005144negative re6/2606    | 19/23843  | 0.013082 | 0.344565 | 0.327644 | Dmrt1/Fbx   |
| GO_BP_m1GO:003592cellular resj10/2606 | 42/23843  | 0.01326  | 0.344565 | 0.327644 | Adgra2/Cd   |

|                                        |           |          |          |          |             |
|----------------------------------------|-----------|----------|----------|----------|-------------|
| GO_BP_m1GO:190384negative re13/2606    | 61/23843  | 0.01332  | 0.344565 | 0.327644 | Cav1/Danc   |
| GO_BP_m1GO:00001Einactivator5/2606     | 14/23843  | 0.013337 | 0.344565 | 0.327644 | Cav1/Dusp   |
| GO_BP_m1GO:00327Enegative re5/2606     | 14/23843  | 0.013337 | 0.344565 | 0.327644 | Atp2b4/Ca   |
| GO_BP_m1GO:00434Eregulation 5/2606     | 14/23843  | 0.013337 | 0.344565 | 0.327644 | Bpgm/Hsd    |
| GO_BP_m1GO:007222metanephros5/2606     | 14/23843  | 0.013337 | 0.344565 | 0.327644 | Lamb2/Lgr   |
| GO_BP_m1GO:19047Epositive re5/2606     | 14/23843  | 0.013337 | 0.344565 | 0.327644 | Dock4/Doc   |
| GO_BP_m1GO:014001meiotic nu30/2606     | 181/23843 | 0.013408 | 0.345387 | 0.328426 | Btbd18/Cal  |
| GO_BP_m1GO:00345Ecellular res39/2606   | 249/23843 | 0.013539 | 0.3469   | 0.329865 | Adnp2/Arl6  |
| GO_BP_m1GO:00104Eproteasome63/2606     | 437/23843 | 0.013576 | 0.3469   | 0.329865 | 1500015O:   |
| GO_BP_m1GO:00347Eregulation 64/2606    | 445/23843 | 0.013585 | 0.3469   | 0.329865 | Abcb1a/Ac   |
| GO_BP_m1GO:000712meiosis I 21/2606     | 116/23843 | 0.013881 | 0.353425 | 0.336069 | Btbd18/Ter  |
| GO_BP_m1GO:000177leukocyte r20/2606    | 109/23843 | 0.013964 | 0.353486 | 0.336127 | Dock10/Gc   |
| GO_BP_m1GO:20001Enegative re20/2606    | 109/23843 | 0.013964 | 0.353486 | 0.336127 | Adamts1/A   |
| GO_BP_m1GO:00487Ecardiac muscle38/2606 | 242/23843 | 0.014087 | 0.353899 | 0.33652  | Adamts9/A   |
| GO_BP_m1GO:00067Evitamin me14/2606     | 68/23843  | 0.014101 | 0.353899 | 0.33652  | Acpp/Clybl  |
| GO_BP_m1GO:003241negative re14/2606    | 68/23843  | 0.014101 | 0.353899 | 0.33652  | Adra1d/Ca   |
| GO_BP_m1GO:003447ncRNA pro50/2606      | 335/23843 | 0.014162 | 0.354222 | 0.336827 | 2210016F1   |
| GO_BP_m1GO:000801regulation 28/2606    | 167/23843 | 0.014235 | 0.354222 | 0.336827 | Adm/Ador    |
| GO_BP_m1GO:00971Eammonium 28/2606      | 167/23843 | 0.014235 | 0.354222 | 0.336827 | Abat/Abhd   |
| GO_BP_m1GO:004341macromole42/2606      | 273/23843 | 0.014343 | 0.355902 | 0.338424 | Virma/Ash:  |
| GO_BP_m1GO:00068Eneurotrans39/2606     | 250/23843 | 0.014398 | 0.355902 | 0.338424 | Abat/Arl6iq |
| GO_BP_m1GO:00439Enegative re30/2606    | 182/23843 | 0.014424 | 0.355902 | 0.338424 | Anxa2/Arhq  |
| GO_BP_m1GO:00458Epositive re47/2606    | 312/23843 | 0.014511 | 0.357049 | 0.339514 | Adam8/Aif   |
| GO_BP_m1GO:007134cellular res15/2606   | 75/23843  | 0.014671 | 0.35996  | 0.342283 | Ankrd1/Ca   |
| GO_BP_m1GO:00228Eregulation 38/2606    | 243/23843 | 0.014989 | 0.363461 | 0.345612 | Abcb1a/Ac   |
| GO_BP_m1GO:009017organelle r26/2606    | 153/23843 | 0.015036 | 0.363461 | 0.345612 | Ankfy1/An   |
| GO_BP_m1GO:00070Emitotic sist7/2606    | 25/23843  | 0.015061 | 0.363461 | 0.345612 | Cdc20/H2a   |
| GO_BP_m1GO:00072Espermatid 7/2606      | 25/23843  | 0.015061 | 0.363461 | 0.345612 | Dmrtc2/lftE |
| GO_BP_m1GO:00328Enegative re7/2606     | 25/23843  | 0.015061 | 0.363461 | 0.345612 | Abat/Ador   |
| GO_BP_m1GO:005077RNA destal7/2606      | 25/23843  | 0.015061 | 0.363461 | 0.345612 | Cnot6l/Cpe  |
| GO_BP_m1GO:003112cytoplasmic13/2606    | 62/23843  | 0.015213 | 0.364422 | 0.346526 | Cav3/Cib1/  |
| GO_BP_m1GO:00160Ecarbohydrate21/2606   | 117/23843 | 0.015226 | 0.364422 | 0.346526 | Abhd10/Pc   |
| GO_BP_m1GO:00432Epositive re21/2606    | 117/23843 | 0.015226 | 0.364422 | 0.346526 | Aifm1/Alox  |
| GO_BP_m1GO:00022Eresponse tr56/2606    | 384/23843 | 0.015413 | 0.367891 | 0.349824 | 5730559C1   |
| GO_BP_m1GO:007122cellular res40/2606   | 259/23843 | 0.015589 | 0.371092 | 0.352868 | Ankrd1/Bcr  |
| GO_BP_m1GO:00485Elymph node8/2606      | 31/23843  | 0.015893 | 0.375883 | 0.357424 | Cd248/Cxc   |
| GO_BP_m1GO:00509Eregulation 8/2606     | 31/23843  | 0.015893 | 0.375883 | 0.357424 | Atp2b4/Ca   |
| GO_BP_m1GO:00303Enegative re38/2606    | 244/23843 | 0.015937 | 0.375883 | 0.357424 | Adamts9/A   |
| GO_BP_m1GO:00060Egluconeogen14/2606    | 69/23843  | 0.015961 | 0.375883 | 0.357424 | Atf3/Bpgm   |
| GO_BP_m1GO:000081sister chr29/2606     | 176/23843 | 0.016019 | 0.376232 | 0.357755 | Ankrd53/C   |
| GO_BP_m1GO:00072Espermatog 69/2606     | 489/23843 | 0.016083 | 0.37672  | 0.35822  | 1110017D1   |
| GO_BP_m1GO:00062E DNA replic40/2606    | 260/23843 | 0.016536 | 0.385154 | 0.36624  | Atr/Baz1a/  |
| GO_BP_m1GO:003241regulation 37/2606    | 237/23843 | 0.016598 | 0.385154 | 0.36624  | Abcb1a/Ac   |
| GO_BP_m1GO:00514Cstress-activ37/2606   | 237/23843 | 0.016598 | 0.385154 | 0.36624  | 5730559C1   |
| GO_BP_m1GO:00464Emembrane21/2606       | 118/23843 | 0.016671 | 0.385154 | 0.36624  | Abo/Acer3   |
| GO_BP_m1GO:00619Emeiosis I c21/2606    | 118/23843 | 0.016671 | 0.385154 | 0.36624  | Btbd18/Ter  |
| GO_BP_m1GO:00075Ecell aging 25/2606    | 147/23843 | 0.016706 | 0.385154 | 0.36624  | 1500015O:   |
| GO_BP_m1GO:00468Epositive re16/2606    | 83/23843  | 0.01682  | 0.385675 | 0.366735 | Avpr1a/Ccr  |



|                   |              |         |           |          |          |          |             |
|-------------------|--------------|---------|-----------|----------|----------|----------|-------------|
| GO_BP_m1GO:002306 | signal relea | 66/2606 | 466/23843 | 0.016915 | 0.385675 | 0.366735 | Abat/Adm    |
| GO_BP_m1GO:200011 | regulation   | 6/2606  | 20/23843  | 0.016995 | 0.385675 | 0.366735 | Bcas3/Cfl1  |
| GO_BP_m1GO:001571 | organic ani  | 58/2606 | 402/23843 | 0.017014 | 0.385675 | 0.366735 | Abat/Abca   |
| GO_BP_m1GO:007190 | regulation   | 60/2606 | 418/23843 | 0.017034 | 0.385675 | 0.366735 | 5730559C1   |
| GO_BP_m1GO:001584 | organic aci  | 43/2606 | 284/23843 | 0.017262 | 0.385675 | 0.366735 | Abat/Abcc   |
| GO_BP_m1GO:000635 | tRNA splici  | 4/2606  | 10/23843  | 0.017387 | 0.385675 | 0.366735 | Rtraf/Tsen2 |
| GO_BP_m1GO:003313 | regulation   | 4/2606  | 10/23843  | 0.017387 | 0.385675 | 0.366735 | Cox11/Foxo  |
| GO_BP_m1GO:003524 | peptidyl-ar  | 4/2606  | 10/23843  | 0.017387 | 0.385675 | 0.366735 | Ndufaf7/Pr  |
| GO_BP_m1GO:003524 | peptidyl-ar  | 4/2606  | 10/23843  | 0.017387 | 0.385675 | 0.366735 | Ndufaf7/Pr  |
| GO_BP_m1GO:003953 | negative re  | 4/2606  | 10/23843  | 0.017387 | 0.385675 | 0.366735 | Dhx58/Npl   |
| GO_BP_m1GO:004608 | adenosine    | 4/2606  | 10/23843  | 0.017387 | 0.385675 | 0.366735 | Acpp/Adk    |
| GO_BP_m1GO:005156 | positive re  | 4/2606  | 10/23843  | 0.017387 | 0.385675 | 0.366735 | Bcap31/Bn   |
| GO_BP_m1GO:006200 | secondary    | 4/2606  | 10/23843  | 0.017387 | 0.385675 | 0.366735 | Col11a2/Fc  |
| GO_BP_m1GO:190251 | regulation   | 4/2606  | 10/23843  | 0.017387 | 0.385675 | 0.366735 | Aifm1/Dffa  |
| GO_BP_m1GO:000961 | response tr  | 40/2606 | 261/23843 | 0.017528 | 0.386261 | 0.367293 | Abcf3/Apo   |
| GO_BP_m1GO:000626 | DNA-depe     | 23/2606 | 133/23843 | 0.017528 | 0.386261 | 0.367293 | Baz1a/Blm   |
| GO_BP_m1GO:003134 | negative re  | 32/2606 | 200/23843 | 0.01776  | 0.386261 | 0.367293 | Adora1/Ao   |
| GO_BP_m1GO:006053 | skeletal m   | 32/2606 | 200/23843 | 0.01776  | 0.386261 | 0.367293 | Acta1/Ankr  |
| GO_BP_m1GO:005067 | epithelial c | 58/2606 | 403/23843 | 0.017818 | 0.386261 | 0.367293 | Slurp2/A4g  |
| GO_BP_m1GO:000728 | sperm axor   | 5/2606  | 15/23843  | 0.018236 | 0.386261 | 0.367293 | Bbs2/Dnah   |
| GO_BP_m1GO:004295 | lipoprotein  | 5/2606  | 15/23843  | 0.018236 | 0.386261 | 0.367293 | Apobec1/C   |
| GO_BP_m1GO:004482 | modulator    | 5/2606  | 15/23843  | 0.018236 | 0.386261 | 0.367293 | Fmr1/Nuck   |
| GO_BP_m1GO:004487 | lipoprotein  | 5/2606  | 15/23843  | 0.018236 | 0.386261 | 0.367293 | Apobec1/C   |
| GO_BP_m1GO:190011 | positive re  | 5/2606  | 15/23843  | 0.018236 | 0.386261 | 0.367293 | Bok/Endog   |
| GO_BP_m1GO:190162 | regulation   | 5/2606  | 15/23843  | 0.018236 | 0.386261 | 0.367293 | Cdh2/Lrp4   |
| GO_BP_m1GO:005164 | vesicle loc  | 33/2606 | 208/23843 | 0.01826  | 0.386261 | 0.367293 | Bloc1s5/Cc  |
| GO_BP_m1GO:190382 | positive re  | 50/2606 | 340/23843 | 0.018299 | 0.386261 | 0.367293 | Abca12/Ari  |
| GO_BP_m1GO:004275 | eating beh.  | 10/2606 | 44/23843  | 0.0183   | 0.386261 | 0.367293 | Aoc3/Cd36   |
| GO_BP_m1GO:007023 | regulation   | 10/2606 | 44/23843  | 0.0183   | 0.386261 | 0.367293 | Adam8/Bln   |
| GO_BP_m1GO:009020 | regulation   | 10/2606 | 44/23843  | 0.0183   | 0.386261 | 0.367293 | Apobec1/C   |
| GO_BP_m1GO:000640 | mRNA cat     | 31/2606 | 193/23843 | 0.018434 | 0.386261 | 0.367293 | Apobec1/B   |
| GO_BP_m1GO:001589 | drug trans   | 31/2606 | 193/23843 | 0.018434 | 0.386261 | 0.367293 | Abat/Abcb   |
| GO_BP_m1GO:003241 | negative re  | 15/2606 | 77/23843  | 0.018465 | 0.386261 | 0.367293 | Adra1d/Ca   |
| GO_BP_m1GO:190160 | alpha-amir   | 15/2606 | 77/23843  | 0.018465 | 0.386261 | 0.367293 | Aldh4a1/Ai  |
| GO_BP_m1GO:000283 | regulation   | 24/2606 | 141/23843 | 0.018568 | 0.386261 | 0.367293 | Arg1/Cacti  |
| GO_BP_m1GO:200123 | regulation   | 57/2606 | 396/23843 | 0.018647 | 0.386261 | 0.367293 | Atf3/Bcap3  |
| GO_BP_m1GO:000658 | catecholam   | 12/2606 | 57/23843  | 0.018676 | 0.386261 | 0.367293 | Abat/Gch1   |
| GO_BP_m1GO:000971 | catechol-c   | 12/2606 | 57/23843  | 0.018676 | 0.386261 | 0.367293 | Abat/Gch1   |
| GO_BP_m1GO:004800 | platelet-de  | 12/2606 | 57/23843  | 0.018676 | 0.386261 | 0.367293 | Abl2/Bcar1  |
| GO_BP_m1GO:004582 | negative re  | 7/2606  | 26/23843  | 0.018712 | 0.386261 | 0.367293 | Adora1/Ad   |
| GO_BP_m1GO:005135 | negative re  | 7/2606  | 26/23843  | 0.018712 | 0.386261 | 0.367293 | Adra1d/Ak   |
| GO_BP_m1GO:005160 | defense re   | 34/2606 | 216/23843 | 0.018722 | 0.386261 | 0.367293 | Abcf3/Apo   |
| GO_BP_m1GO:005080 | negative re  | 16/2606 | 84/23843  | 0.018733 | 0.386261 | 0.367293 | Adora1/Ad   |
| GO_BP_m1GO:190101 | regulation   | 16/2606 | 84/23843  | 0.018733 | 0.386261 | 0.367293 | Adra1d/Ak   |
| GO_BP_m1GO:000728 | germ cell    | 41/2606 | 270/23843 | 0.018824 | 0.386337 | 0.367365 | Acrbp/Aml   |
| GO_BP_m1GO:003109 | stress-activ | 41/2606 | 270/23843 | 0.018824 | 0.386337 | 0.367365 | 5730559C1   |
| GO_BP_m1GO:002240 | positive re  | 35/2606 | 224/23843 | 0.019147 | 0.392052 | 0.372799 | Adam8/Ad    |
| GO_BP_m1GO:190161 | organic hydr | 62/2606 | 437/23843 | 0.019425 | 0.392813 | 0.373523 | Abat/Acer3  |

|                                       |           |          |          |          |              |
|---------------------------------------|-----------|----------|----------|----------|--------------|
| GO_BP_m1GO:003287regulation 33/2606   | 209/23843 | 0.019478 | 0.392813 | 0.373523 | 5730559C1    |
| GO_BP_m1GO:000751muscle org58/2606    | 405/23843 | 0.01952  | 0.392813 | 0.373523 | Acta1/Akap   |
| GO_BP_m1GO:000693regulation 25/2606   | 149/23843 | 0.019536 | 0.392813 | 0.373523 | Abat/Adora   |
| GO_BP_m1GO:000717transformir25/2606   | 149/23843 | 0.019536 | 0.392813 | 0.373523 | Cav1/Cav3    |
| GO_BP_m1GO:004692regulation 13/2606   | 64/23843  | 0.019608 | 0.392813 | 0.373523 | Camk2a/Fr    |
| GO_BP_m1GO:000609generation 50/2606   | 342/23843 | 0.020207 | 0.392813 | 0.373523 | Adh1/Adh5    |
| GO_BP_m1GO:000629nucleotide 3/2606    | 6/23843   | 0.020221 | 0.392813 | 0.373523 | Lig3/PolD3   |
| GO_BP_m1GO:000719adenylate c3/2606    | 6/23843   | 0.020221 | 0.392813 | 0.373523 | Chrm1/Chr    |
| GO_BP_m1GO:000719adenylate c3/2606    | 6/23843   | 0.020221 | 0.392813 | 0.373523 | Htr1a/Htr5   |
| GO_BP_m1GO:003323negative re3/2606    | 6/23843   | 0.020221 | 0.392813 | 0.373523 | Atp2b4/Itg   |
| GO_BP_m1GO:003953regulation 3/2606    | 6/23843   | 0.020221 | 0.392813 | 0.373523 | Ddx60/Dhx    |
| GO_BP_m1GO:004521neurotrans 3/2606    | 6/23843   | 0.020221 | 0.392813 | 0.373523 | Ache/Fnta/   |
| GO_BP_m1GO:009016Golgi disas 3/2606   | 6/23843   | 0.020221 | 0.392813 | 0.373523 | Cdk1/Gbf1    |
| GO_BP_m1GO:009703protein line3/2606   | 6/23843   | 0.020221 | 0.392813 | 0.373523 | Park2/Rbck   |
| GO_BP_m1GO:190162negative re3/2606    | 6/23843   | 0.020221 | 0.392813 | 0.373523 | Prkacb/Tra   |
| GO_BP_m1GO:190162positive re3/2606    | 6/23843   | 0.020221 | 0.392813 | 0.373523 | Lrp4/Mesd    |
| GO_BP_m1GO:190172negative re3/2606    | 6/23843   | 0.020221 | 0.392813 | 0.373523 | Fln/Ifnfng/M |
| GO_BP_m1GO:190391positive re3/2606    | 6/23843   | 0.020221 | 0.392813 | 0.373523 | Lrp4/Mesd    |
| GO_BP_m1GO:190479positive re3/2606    | 6/23843   | 0.020221 | 0.392813 | 0.373523 | Foxc1/Ifnfng |
| GO_BP_m1GO:200063positive re3/2606    | 6/23843   | 0.020221 | 0.392813 | 0.373523 | Nfkb1/Pnp    |
| GO_BP_m1GO:003289regulation 14/2606   | 71/23843  | 0.020238 | 0.392813 | 0.373523 | Abat/Adora   |
| GO_BP_m1GO:004273embryonic 14/2606    | 71/23843  | 0.020238 | 0.392813 | 0.373523 | B9d1/Frem    |
| GO_BP_m1GO:005092regulation 32/2606   | 202/23843 | 0.020258 | 0.392813 | 0.373523 | Adgra2/Ca    |
| GO_BP_m1GO:001714negative re35/2606   | 225/23843 | 0.020364 | 0.394    | 0.374651 | Btg2/Calr/C  |
| GO_BP_m1GO:000694regulation 15/2606   | 78/23843  | 0.020622 | 0.39781  | 0.378274 | Adora1/Ak    |
| GO_BP_m1GO:00703Cregulation 33/2606   | 210/23843 | 0.020759 | 0.39781  | 0.378274 | 5730559C1    |
| GO_BP_m1GO:00321Cnegative re46/2606   | 311/23843 | 0.020824 | 0.39781  | 0.378274 | Abat/Adora   |
| GO_BP_m1GO:005181modificatic17/2606   | 92/23843  | 0.020833 | 0.39781  | 0.378274 | Anxa2/Arg    |
| GO_BP_m1GO:006002roof of mo 17/2606   | 92/23843  | 0.020833 | 0.39781  | 0.378274 | Asph/Col1:   |
| GO_BP_m1GO:00603Eresponse tr17/2606   | 92/23843  | 0.020833 | 0.39781  | 0.378274 | Abat/Adra:   |
| GO_BP_m1GO:19016Calpha-amir31/2606    | 195/23843 | 0.021061 | 0.40131  | 0.381602 | Dglucy/Ad:   |
| GO_BP_m1GO:003424negative re37/2606   | 241/23843 | 0.021107 | 0.401316 | 0.381608 | Btg2/C330I   |
| GO_BP_m1GO:00328Eregulation 34/2606   | 218/23843 | 0.02122  | 0.402576 | 0.382806 | Ankrd53/Bl   |
| GO_BP_m1GO:004887multicellulaz51/2606 | 351/23843 | 0.021279 | 0.402825 | 0.383043 | 5730559C1    |
| GO_BP_m1GO:007121cellular res43/2606  | 288/23843 | 0.021456 | 0.405319 | 0.385414 | Ankrd1/Atc   |
| GO_BP_m1GO:00108Eregulation 6/2606    | 21/23843  | 0.021644 | 0.406234 | 0.386284 | Dgat1/Gpa    |
| GO_BP_m1GO:00311ErRNA meth6/2606      | 21/23843  | 0.021644 | 0.406234 | 0.386284 | Ftsj3/Gm1E   |
| GO_BP_m1GO:00435Etongue dev6/2606     | 21/23843  | 0.021644 | 0.406234 | 0.386284 | Hdac1/Hda    |
| GO_BP_m1GO:001067regulation 24/2606   | 143/23843 | 0.021731 | 0.407001 | 0.387014 | Adcyap1r1    |
| GO_BP_m1GO:200011regulation 36/2606   | 234/23843 | 0.022025 | 0.411637 | 0.391422 | Aifm1/Alox   |
| GO_BP_m1GO:005511regulation 13/2606   | 65/23843  | 0.022133 | 0.412772 | 0.392501 | Adora1/Ak    |
| GO_BP_m1GO:00063Cdouble-str9/2606     | 39/23843  | 0.022344 | 0.413973 | 0.393644 | Dclre1a/De   |
| GO_BP_m1GO:00308Ecortical act 9/2606  | 39/23843  | 0.022344 | 0.413973 | 0.393644 | Calr/Cdk5/   |
| GO_BP_m1GO:001931hexose bio 14/2606   | 72/23843  | 0.022675 | 0.413973 | 0.393644 | Atf3/Bpgm    |
| GO_BP_m1GO:00380Evascular en7/2606    | 27/23843  | 0.02294  | 0.413973 | 0.393644 | Adgra2/Cd    |
| GO_BP_m1GO:004303positive re7/2606    | 27/23843  | 0.02294  | 0.413973 | 0.393644 | Il10/Il1r1/I |
| GO_BP_m1GO:00902Cpositive re7/2606    | 27/23843  | 0.02294  | 0.413973 | 0.393644 | Cd36/Dgat    |
| GO_BP_m1GO:190011regulation 7/2606    | 27/23843  | 0.02294  | 0.413973 | 0.393644 | Aifm1/Bok    |

|                                |          |           |          |          |          |             |
|--------------------------------|----------|-----------|----------|----------|----------|-------------|
| GO_BP_m1GO:000715adenylate c   | 15/2606  | 79/23843  | 0.022964 | 0.413973 | 0.393644 | Adora1/Ad   |
| GO_BP_m1GO:003051negative re   | 11/2606  | 52/23843  | 0.022969 | 0.413973 | 0.393644 | Cav1/Danc   |
| GO_BP_m1GO:003086cortical cyt  | 11/2606  | 52/23843  | 0.022969 | 0.413973 | 0.393644 | Calr/Cdk5/  |
| GO_BP_m1GO:005507sodium ion    | 11/2606  | 52/23843  | 0.022969 | 0.413973 | 0.393644 | Adora1/Atj  |
| GO_BP_m1GO:200014negative re   | 39/2606  | 258/23843 | 0.022976 | 0.413973 | 0.393644 | Adamts9/A   |
| GO_BP_m1GO:000275cytoplasmic   | 8/2606   | 33/23843  | 0.022999 | 0.413973 | 0.393644 | 5730559C1   |
| GO_BP_m1GO:003111positive re   | 8/2606   | 33/23843  | 0.022999 | 0.413973 | 0.393644 | Ankrd53/C   |
| GO_BP_m1GO:004801ephrin rece   | 8/2606   | 33/23843  | 0.022999 | 0.413973 | 0.393644 | Chn1/Epha   |
| GO_BP_m1GO:190002positive re   | 8/2606   | 33/23843  | 0.022999 | 0.413973 | 0.393644 | Calr/Cib1/E |
| GO_BP_m1GO:190074regulation    | 8/2606   | 33/23843  | 0.022999 | 0.413973 | 0.393644 | Cav3/Ezr/H  |
| GO_BP_m1GO:003591skeletal m    | 16/2606  | 86/23843  | 0.023052 | 0.414087 | 0.393752 | Ankrd1/Arr  |
| GO_BP_m1GO:004677protein aut   | 37/2606  | 243/23843 | 0.023701 | 0.424879 | 0.404014 | Aatk/Abl2/  |
| GO_BP_m1GO:004239regulation    | 61/2606  | 434/23843 | 0.024127 | 0.429232 | 0.408153 | Abat/Abcb   |
| GO_BP_m1GO:003603osteoclast    | 15/2606  | 16/23843  | 0.024188 | 0.429232 | 0.408153 | Anxa2/Cldr  |
| GO_BP_m1GO:004501negative re   | 5/2606   | 16/23843  | 0.024188 | 0.429232 | 0.408153 | Atp2b4/Ca   |
| GO_BP_m1GO:007201glomerular    | 5/2606   | 16/23843  | 0.024188 | 0.429232 | 0.408153 | Basp1/Foxc  |
| GO_BP_m1GO:190440negative re   | 5/2606   | 16/23843  | 0.024188 | 0.429232 | 0.408153 | Atp2b4/Ca   |
| GO_BP_m1GO:000756aging         | 35/2606  | 228/23843 | 0.024384 | 0.430971 | 0.409806 | 1500015O:   |
| GO_BP_m1GO:004544fat cell diff | 35/2606  | 228/23843 | 0.024384 | 0.430971 | 0.409806 | Adig/Ap1s:  |
| GO_BP_m1GO:000610regulation    | 27/2606  | 167/23843 | 0.024493 | 0.431673 | 0.410474 | Adcyap1r1.  |
| GO_BP_m1GO:005109regulation    | 53/2606  | 370/23843 | 0.024536 | 0.431673 | 0.410474 | Abl2/Anxa2  |
| GO_BP_m1GO:000698response tr   | 19/2606  | 108/23843 | 0.024573 | 0.431673 | 0.410474 | Atf3/Bok/C  |
| GO_BP_m1GO:004347regulation    | 10/2606  | 46/23843  | 0.024621 | 0.431673 | 0.410474 | Bpgm/Esrrl  |
| GO_BP_m1GO:007250cellular div  | 64/2606  | 459/23843 | 0.024828 | 0.432216 | 0.41099  | Abl2/Adcy2  |
| GO_BP_m1GO:000865cellular am   | 13/2606  | 66/23843  | 0.024892 | 0.432216 | 0.41099  | Abat/Apiip/ |
| GO_BP_m1GO:004340negative re   | 13/2606  | 66/23843  | 0.024892 | 0.432216 | 0.41099  | Cav1/Cav3.  |
| GO_BP_m1GO:004694carboxylic    | 12/2606  | 283/23843 | 0.02494  | 0.432216 | 0.41099  | Abat/Abcc2  |
| GO_BP_m1GO:000721G-protein     | 14/2606  | 11/23843  | 0.024996 | 0.432216 | 0.41099  | Chrm1/Chr   |
| GO_BP_m1GO:190291positive re   | 4/2606   | 11/23843  | 0.024996 | 0.432216 | 0.41099  | Nmi/Park2.  |
| GO_BP_m1GO:190390regulation    | 4/2606   | 11/23843  | 0.024996 | 0.432216 | 0.41099  | Gsn/Lrp4/M  |
| GO_BP_m1GO:190406regulation    | 46/2606  | 315/23843 | 0.025468 | 0.43921  | 0.417641 | Adra1d/Ak   |
| GO_BP_m1GO:001491regulation    | 15/2606  | 80/23843  | 0.025501 | 0.43921  | 0.417641 | Dock4/Doc   |
| GO_BP_m1GO:007121cellular res  | 140/2606 | 268/23843 | 0.025888 | 0.445016 | 0.423162 | Ankrd1/Bcr  |
| GO_BP_m1GO:000268positive re   | 23/2606  | 138/23843 | 0.026118 | 0.447571 | 0.425591 | Adam8/Ao    |
| GO_BP_m1GO:000910coenzyme      | 27/2606  | 168/23843 | 0.026244 | 0.447571 | 0.425591 | Bpgm/Coq    |
| GO_BP_m1GO:000673oxidoreduc    | 25/2606  | 153/23843 | 0.026314 | 0.447571 | 0.425591 | Bpgm/Coq    |
| GO_BP_m1GO:000693smooth m      | 19/2606  | 109/23843 | 0.026812 | 0.447571 | 0.425591 | Abat/Acta2  |
| GO_BP_m1GO:007162granulocyte   | 19/2606  | 109/23843 | 0.026812 | 0.447571 | 0.425591 | Ccl20/Ccl2: |
| GO_BP_m1GO:000670steroid cat   | 6/2606   | 22/23843  | 0.027079 | 0.447571 | 0.425591 | Cyp46a1/H   |
| GO_BP_m1GO:000706regulation    | 6/2606   | 22/23843  | 0.027079 | 0.447571 | 0.425591 | Fen1/H2afy  |
| GO_BP_m1GO:001088positive re   | 6/2606   | 22/23843  | 0.027079 | 0.447571 | 0.425591 | Cd36/Fitm1  |
| GO_BP_m1GO:007024thymocyte     | 6/2606   | 22/23843  | 0.027079 | 0.447571 | 0.425591 | Adam8/Bln   |
| GO_BP_m1GO:000679sulfur com    | 139/2606 | 261/23843 | 0.027081 | 0.447571 | 0.425591 | Acot1/Acoi  |
| GO_BP_m1GO:003292circadian r   | 12/2606  | 60/23843  | 0.027266 | 0.447571 | 0.425591 | Arntl/Cartp |
| GO_BP_m1GO:005119regulation    | 12/2606  | 60/23843  | 0.027266 | 0.447571 | 0.425591 | Bpgm/Clyb   |
| GO_BP_m1GO:001404dopamine      | 8/2606   | 34/23843  | 0.027279 | 0.447571 | 0.425591 | Abat/Adra1  |
| GO_BP_m1GO:001405regulation    | 8/2606   | 34/23843  | 0.027279 | 0.447571 | 0.425591 | Abat/Adra1  |
| GO_BP_m1GO:004409membrane      | 8/2606   | 34/23843  | 0.027279 | 0.447571 | 0.425591 | Anxa2/Cav   |

|                                |         |           |          |          |          |              |
|--------------------------------|---------|-----------|----------|----------|----------|--------------|
| GO_BP_m1GO:00450C DNA-depe     | 8/2606  | 34/23843  | 0.027279 | 0.447571 | 0.425591 | Blm/Fbxo1    |
| GO_BP_m1GO:000182kidney dev    | 40/2606 | 269/23843 | 0.027303 | 0.447571 | 0.425591 | Adamts1/A    |
| GO_BP_m1GO:00705Ecalcium ior   | 40/2606 | 269/23843 | 0.027303 | 0.447571 | 0.425591 | Adra1d/Ak    |
| GO_BP_m1GO:200102regulation    | 18/2606 | 102/23843 | 0.027337 | 0.447571 | 0.425591 | Abat/Abcb    |
| GO_BP_m1GO:003164regulation    | 17/2606 | 95/23843  | 0.02777  | 0.447571 | 0.425591 | Acpp/Ador    |
| GO_BP_m1GO:000223positive re   | 7/2606  | 28/23843  | 0.027782 | 0.447571 | 0.425591 | Il12b/Mb2    |
| GO_BP_m1GO:005193regulation    | 10/2606 | 47/23843  | 0.028309 | 0.447571 | 0.425591 | Acpp/Ador    |
| GO_BP_m1GO:005193regulation    | 10/2606 | 47/23843  | 0.028309 | 0.447571 | 0.425591 | Acpp/Ador    |
| GO_BP_m1GO:004671acid secreti  | 20/2606 | 117/23843 | 0.028485 | 0.447571 | 0.425591 | Abat/Abcc    |
| GO_BP_m1GO:200123regulation    | 26/2606 | 162/23843 | 0.029191 | 0.447571 | 0.425591 | Atf3/Casp8   |
| GO_BP_m1GO:000007mitotic sist  | 24/2606 | 147/23843 | 0.029295 | 0.447571 | 0.425591 | Ankrd53/C    |
| GO_BP_m1GO:00072Cpositive re   | 44/2606 | 302/23843 | 0.029329 | 0.447571 | 0.425591 | Abl2/Adcy    |
| GO_BP_m1GO:00508Cpositive re   | 47/2606 | 326/23843 | 0.029494 | 0.447571 | 0.425591 | Abat/Ador    |
| GO_BP_m1GO:00481Eregulation    | 49/2606 | 342/23843 | 0.029508 | 0.447571 | 0.425591 | Adora1/Ca    |
| GO_BP_m1GO:00715Ecellular res  | 29/2606 | 185/23843 | 0.029552 | 0.447571 | 0.425591 | Ankrd1/Ca    |
| GO_BP_m1GO:00189Ephenol-co     | 18/2606 | 103/23843 | 0.029857 | 0.447571 | 0.425591 | Abat/Dct/E   |
| GO_BP_m1GO:00075Edigestion     | 21/2606 | 125/23843 | 0.030006 | 0.447571 | 0.425591 | 5730559C1    |
| GO_BP_m1GO:000614regulation    | 27/2606 | 170/23843 | 0.030032 | 0.447571 | 0.425591 | Adm/Adra     |
| GO_BP_m1GO:00064C RNA catab    | 34/2606 | 224/23843 | 0.030318 | 0.447571 | 0.425591 | Apobec1/B    |
| GO_BP_m1GO:00506Cregulation    | 9/2606  | 41/23843  | 0.030324 | 0.447571 | 0.425591 | lfng/Il12b/I |
| GO_BP_m1GO:006101positive re   | 9/2606  | 41/23843  | 0.030324 | 0.447571 | 0.425591 | Btg2/Cnotf   |
| GO_BP_m1GO:004501glycerolipic  | 23/2606 | 140/23843 | 0.030338 | 0.447571 | 0.425591 | Tmem269/     |
| GO_BP_m1GO:00083Cassociative   | 17/2606 | 96/23843  | 0.030427 | 0.447571 | 0.425591 | Abl2/Adarr   |
| GO_BP_m1GO:01400Emitochond     | 17/2606 | 96/23843  | 0.030427 | 0.447571 | 0.425591 | Gfm1/Gm1     |
| GO_BP_m1GO:005127negative re   | 42/2606 | 287/23843 | 0.030609 | 0.447571 | 0.425591 | Adamts9/A    |
| GO_BP_m1GO:00431Eproteasom     | 53/2606 | 375/23843 | 0.030658 | 0.447571 | 0.425591 | 1500015O     |
| GO_BP_m1GO:005043catecholarr   | 12/2606 | 61/23843  | 0.030681 | 0.447571 | 0.425591 | Abat/Adra    |
| GO_BP_m1GO:200124positive re   | 12/2606 | 61/23843  | 0.030681 | 0.447571 | 0.425591 | Bcap31/Bcl   |
| GO_BP_m1GO:000607glycerol m    | 5/2606  | 17/23843  | 0.031258 | 0.447571 | 0.425591 | Angptl3/Cc   |
| GO_BP_m1GO:00108Epositive re   | 5/2606  | 17/23843  | 0.031258 | 0.447571 | 0.425591 | Dgat1/Gpa    |
| GO_BP_m1GO:00140Egamma-an      | 5/2606  | 17/23843  | 0.031258 | 0.447571 | 0.425591 | Abat/Hrh3,   |
| GO_BP_m1GO:00395Cregulation    | 5/2606  | 17/23843  | 0.031258 | 0.447571 | 0.425591 | Ddx60/Dhx    |
| GO_BP_m1GO:004274hydrogen      | 5/2606  | 17/23843  | 0.031258 | 0.447571 | 0.425591 | Gpx1/Prdx    |
| GO_BP_m1GO:00481Evesicle targ  | 5/2606  | 17/23843  | 0.031258 | 0.447571 | 0.425591 | Gbf1/Pdcd    |
| GO_BP_m1GO:00510Cpositive re   | 5/2606  | 17/23843  | 0.031258 | 0.447571 | 0.425591 | Gch1/Nod     |
| GO_BP_m1GO:007024regulation    | 5/2606  | 17/23843  | 0.031258 | 0.447571 | 0.425591 | Adam8/Bln    |
| GO_BP_m1GO:000672isoprenoid    | 14/2606 | 75/23843  | 0.031301 | 0.447571 | 0.425591 | Adh1/Adh     |
| GO_BP_m1GO:00902Enegative re   | 22/2606 | 133/23843 | 0.031386 | 0.447571 | 0.425591 | Adgra2/Ca    |
| GO_BP_m1GO:000941response tr   | 33/2606 | 217/23843 | 0.031693 | 0.447571 | 0.425591 | Abat/Acsl1   |
| GO_BP_m1GO:00510Enegative re   | 68/2606 | 498/23843 | 0.031793 | 0.447571 | 0.425591 | Abat/Ador    |
| GO_BP_m1GO:00170Cantibiotic c  | 8/2606  | 35/23843  | 0.032081 | 0.447571 | 0.425591 | Adh1/Adh     |
| GO_BP_m1GO:004662negative re   | 8/2606  | 35/23843  | 0.032081 | 0.447571 | 0.425591 | Cav3/Hdac    |
| GO_BP_m1GO:009031positive re   | 30/2606 | 194/23843 | 0.032093 | 0.447571 | 0.425591 | Arih2/Asph   |
| GO_BP_m1GO:00725Cdivalent inc  | 66/2606 | 482/23843 | 0.032277 | 0.447571 | 0.425591 | Abl2/Adcy    |
| GO_BP_m1GO:000687cellular calc | 60/2606 | 433/23843 | 0.03231  | 0.447571 | 0.425591 | Abl2/Adcy    |
| GO_BP_m1GO:004651ceramide b    | 10/2606 | 48/23843  | 0.032374 | 0.447571 | 0.425591 | B4galt3/Ce   |
| GO_BP_m1GO:003102microtubul    | 21/2606 | 126/23843 | 0.032428 | 0.447571 | 0.425591 | Bcas3/Deu    |
| GO_BP_m1GO:00072Espermatid     | 25/2606 | 156/23843 | 0.032485 | 0.447571 | 0.425591 | Acrbp/Bbs    |

|                               |         |           |          |          |          |              |
|-------------------------------|---------|-----------|----------|----------|----------|--------------|
| GO_BP_m1GO:000236CD4-positi   | 3/2606  | 7/23843   | 0.032541 | 0.447571 | 0.425591 | lfng/Il2rg/F |
| GO_BP_m1GO:000337sphingosin   | 3/2606  | 7/23843   | 0.032541 | 0.447571 | 0.425591 | Ezr/Spns2/   |
| GO_BP_m1GO:001608synaptic ve  | 3/2606  | 7/23843   | 0.032541 | 0.447571 | 0.425591 | Stx1b/Stx4i  |
| GO_BP_m1GO:003408establishm   | 3/2606  | 7/23843   | 0.032541 | 0.447571 | 0.425591 | Hdac8/Naa    |
| GO_BP_m1GO:003558sequesterir  | 3/2606  | 7/23843   | 0.032541 | 0.447571 | 0.425591 | Dand5/Fbr    |
| GO_BP_m1GO:003562ceramide ti  | 3/2606  | 7/23843   | 0.032541 | 0.447571 | 0.425591 | Abca12/Ab    |
| GO_BP_m1GO:003648TRAIL-acti   | 3/2606  | 7/23843   | 0.032541 | 0.447571 | 0.425591 | Atf3/Casp8   |
| GO_BP_m1GO:003953MDA-5 sig    | 3/2606  | 7/23843   | 0.032541 | 0.447571 | 0.425591 | Ddx60/Dhx    |
| GO_BP_m1GO:003953negative re  | 3/2606  | 7/23843   | 0.032541 | 0.447571 | 0.425591 | Dhx58/Npl    |
| GO_BP_m1GO:004482negative re  | 3/2606  | 7/23843   | 0.032541 | 0.447571 | 0.425591 | Park2/Vapt   |
| GO_BP_m1GO:005094positive re  | 3/2606  | 7/23843   | 0.032541 | 0.447571 | 0.425591 | Adamts9/B    |
| GO_BP_m1GO:005102rRNA trans   | 3/2606  | 7/23843   | 0.032541 | 0.447571 | 0.425591 | Mrpl18/Pnj   |
| GO_BP_m1GO:005104negative re  | 3/2606  | 7/23843   | 0.032541 | 0.447571 | 0.425591 | Il10/Timp1.  |
| GO_BP_m1GO:005125mitotic spir | 3/2606  | 7/23843   | 0.032541 | 0.447571 | 0.425591 | Kif23/Kif4/I |
| GO_BP_m1GO:005135positive re  | 3/2606  | 7/23843   | 0.032541 | 0.447571 | 0.425591 | Gclm/Ripk3   |
| GO_BP_m1GO:007231clathrin co  | 3/2606  | 7/23843   | 0.032541 | 0.447571 | 0.425591 | Dnajc6/Sh3   |
| GO_BP_m1GO:190389regulation   | 3/2606  | 7/23843   | 0.032541 | 0.447571 | 0.425591 | Bok/Nck2/I   |
| GO_BP_m1GO:190479regulation   | 3/2606  | 7/23843   | 0.032541 | 0.447571 | 0.425591 | Foxc1/lfng,  |
| GO_BP_m1GO:190505positive re  | 3/2606  | 7/23843   | 0.032541 | 0.447571 | 0.425591 | Antxr1/Ddr   |
| GO_BP_m1GO:199086response tr  | 3/2606  | 7/23843   | 0.032541 | 0.447571 | 0.425591 | Dock8/Foxi   |
| GO_BP_m1GO:199086cellular res | 3/2606  | 7/23843   | 0.032541 | 0.447571 | 0.425591 | Dock8/Foxi   |
| GO_BP_m1GO:200076negative re  | 3/2606  | 7/23843   | 0.032541 | 0.447571 | 0.425591 | Cpeb3/Cpe    |
| GO_BP_m1GO:004213neurotrans   | 23/2606 | 141/23843 | 0.032632 | 0.447571 | 0.425591 | Abat/Ache,   |
| GO_BP_m1GO:009900vesicle-me   | 23/2606 | 141/23843 | 0.032632 | 0.447571 | 0.425591 | Bloc1s5/Ca   |
| GO_BP_m1GO:004828organelle f  | 64/2606 | 466/23843 | 0.032746 | 0.447571 | 0.425591 | Ankrd53/Bl   |
| GO_BP_m1GO:000647protein ac   | 28/2606 | 179/23843 | 0.032827 | 0.447571 | 0.425591 | Arntl/Brpf3  |
| GO_BP_m1GO:009752myeloid let  | 28/2606 | 179/23843 | 0.032827 | 0.447571 | 0.425591 | Adam8/Ccl    |
| GO_BP_m1GO:000030retrograde   | 2/2606  | 3/23843   | 0.033217 | 0.447571 | 0.425591 | Cog4/Dnaj    |
| GO_BP_m1GO:000037tRNA-type    | 2/2606  | 3/23843   | 0.033217 | 0.447571 | 0.425591 | Tsen2/Tser   |
| GO_BP_m1GO:000212maternal a   | 2/2606  | 3/23843   | 0.033217 | 0.447571 | 0.425591 | Avpr1a/Cr1   |
| GO_BP_m1GO:000620pyrimidine   | 2/2606  | 3/23843   | 0.033217 | 0.447571 | 0.425591 | Dpyd/Dpys    |
| GO_BP_m1GO:000621thymine ca   | 2/2606  | 3/23843   | 0.033217 | 0.447571 | 0.425591 | Dpyd/Dpys    |
| GO_BP_m1GO:0006215-methylc    | 2/2606  | 3/23843   | 0.033217 | 0.447571 | 0.425591 | Tet2/Tet3    |
| GO_BP_m1GO:000653aspartate c  | 2/2606  | 3/23843   | 0.033217 | 0.447571 | 0.425591 | Ddo/Got1     |
| GO_BP_m1GO:001059negative re  | 2/2606  | 3/23843   | 0.033217 | 0.447571 | 0.425591 | Cfl1/Plxnb3  |
| GO_BP_m1GO:0019855-methylc    | 2/2606  | 3/23843   | 0.033217 | 0.447571 | 0.425591 | Tet2/Tet3    |
| GO_BP_m1GO:001985thymine m    | 2/2606  | 3/23843   | 0.033217 | 0.447571 | 0.425591 | Dpyd/Dpys    |
| GO_BP_m1GO:001986uracil meta  | 2/2606  | 3/23843   | 0.033217 | 0.447571 | 0.425591 | Dpyd/Dpys    |
| GO_BP_m1GO:003202response tr  | 2/2606  | 3/23843   | 0.033217 | 0.447571 | 0.425591 | Bnip3/Tiga   |
| GO_BP_m1GO:003283positive re  | 2/2606  | 3/23843   | 0.033217 | 0.447571 | 0.425591 | lfng/Il2rg   |
| GO_BP_m1GO:003409negative re  | 2/2606  | 3/23843   | 0.033217 | 0.447571 | 0.425591 | Naa10/Tnk    |
| GO_BP_m1GO:003415regulation   | 2/2606  | 3/23843   | 0.033217 | 0.447571 | 0.425591 | Ptpn22/Tre   |
| GO_BP_m1GO:003415positive re  | 2/2606  | 3/23843   | 0.033217 | 0.447571 | 0.425591 | Ptpn22/Tre   |
| GO_BP_m1GO:003415negative re  | 2/2606  | 3/23843   | 0.033217 | 0.447571 | 0.425591 | Naa10/Tnk    |
| GO_BP_m1GO:003602limb joint r | 2/2606  | 3/23843   | 0.033217 | 0.447571 | 0.425591 | Osr1/Osr2    |
| GO_BP_m1GO:003602embryonic    | 2/2606  | 3/23843   | 0.033217 | 0.447571 | 0.425591 | Osr1/Osr2    |
| GO_BP_m1GO:004483modulator    | 2/2606  | 3/23843   | 0.033217 | 0.447571 | 0.425591 | Fmr1/Vapt    |
| GO_BP_m1GO:004519establishm   | 2/2606  | 3/23843   | 0.033217 | 0.447571 | 0.425591 | Dock7/Fgf    |

|                                |         |           |          |          |          |             |
|--------------------------------|---------|-----------|----------|----------|----------|-------------|
| GO_BP_m1GO:00452Cestablishm    | 2/2606  | 3/23843   | 0.033217 | 0.447571 | 0.425591 | Dock7/Fgf   |
| GO_BP_m1GO:00469Esensitizatio  | 2/2606  | 3/23843   | 0.033217 | 0.447571 | 0.425591 | Drd5/Grin2  |
| GO_BP_m1GO:00719Enegative re   | 2/2606  | 3/23843   | 0.033217 | 0.447571 | 0.425591 | E2f1/E2f7   |
| GO_BP_m1GO:00903Eregulation    | 2/2606  | 3/23843   | 0.033217 | 0.447571 | 0.425591 | Apobec1/F   |
| GO_BP_m1GO:009897excitatory c  | 2/2606  | 3/23843   | 0.033217 | 0.447571 | 0.425591 | Pdlim4/Ssh  |
| GO_BP_m1GO:01100Ecellular det  | 2/2606  | 3/23843   | 0.033217 | 0.447571 | 0.425591 | Adh5/Esd    |
| GO_BP_m1GO:190024positive re   | 2/2606  | 3/23843   | 0.033217 | 0.447571 | 0.425591 | Ddx60/Dhx   |
| GO_BP_m1GO:19004Enegative re   | 2/2606  | 3/23843   | 0.033217 | 0.447571 | 0.425591 | Adora1/Frr  |
| GO_BP_m1GO:190147pyruvate tr   | 2/2606  | 3/23843   | 0.033217 | 0.447571 | 0.425591 | Mpc2/Slc1   |
| GO_BP_m1GO:19015Cregulation    | 2/2606  | 3/23843   | 0.033217 | 0.447571 | 0.425591 | Cxcl10/Fgf  |
| GO_BP_m1GO:19016Eregulation    | 2/2606  | 3/23843   | 0.033217 | 0.447571 | 0.425591 | Lrp4/Lrrtm  |
| GO_BP_m1GO:19016Eglycoside t   | 2/2606  | 3/23843   | 0.033217 | 0.447571 | 0.425591 | Abcb1a/Ra   |
| GO_BP_m1GO:19020Eregulation    | 2/2606  | 3/23843   | 0.033217 | 0.447571 | 0.425591 | Hrc/Mrln    |
| GO_BP_m1GO:19028Cregulation    | 2/2606  | 3/23843   | 0.033217 | 0.447571 | 0.425591 | Nln/Tbx1    |
| GO_BP_m1GO:19028Eterminal w    | 2/2606  | 3/23843   | 0.033217 | 0.447571 | 0.425591 | Ezr/Pls1    |
| GO_BP_m1GO:19035Emeiotic cel   | 2/2606  | 3/23843   | 0.033217 | 0.447571 | 0.425591 | Ppp2r1a/Yi  |
| GO_BP_m1GO:19035Eregulation    | 2/2606  | 3/23843   | 0.033217 | 0.447571 | 0.425591 | Ppp2r1a/Yi  |
| GO_BP_m1GO:19038Enegative re   | 2/2606  | 3/23843   | 0.033217 | 0.447571 | 0.425591 | Nck2/Ptpn   |
| GO_BP_m1GO:190404regulation    | 2/2606  | 3/23843   | 0.033217 | 0.447571 | 0.425591 | Park2/Stx1  |
| GO_BP_m1GO:190421regulation    | 2/2606  | 3/23843   | 0.033217 | 0.447571 | 0.425591 | Serinc2/Sei |
| GO_BP_m1GO:190421positive re   | 2/2606  | 3/23843   | 0.033217 | 0.447571 | 0.425591 | Serinc2/Sei |
| GO_BP_m1GO:190422positive re   | 2/2606  | 3/23843   | 0.033217 | 0.447571 | 0.425591 | Serinc2/Sei |
| GO_BP_m1GO:20001Eregulation    | 2/2606  | 3/23843   | 0.033217 | 0.447571 | 0.425591 | Dgkq/Ppar   |
| GO_BP_m1GO:20002Ereceptor in   | 2/2606  | 3/23843   | 0.033217 | 0.447571 | 0.425591 | Cav1/Rab5   |
| GO_BP_m1GO:00440Eregulation    | 7/2606  | 29/23843  | 0.033273 | 0.447571 | 0.425591 | Adora1/Av   |
| GO_BP_m1GO:00071Enegative re   | 6/2606  | 23/23843  | 0.033344 | 0.447571 | 0.425591 | Adra1d/Ak   |
| GO_BP_m1GO:003032adrenal gla   | 6/2606  | 23/23843  | 0.033344 | 0.447571 | 0.425591 | Cdkn1c/Lyt  |
| GO_BP_m1GO:00611EmRNA des      | 6/2606  | 23/23843  | 0.033344 | 0.447571 | 0.425591 | Cnot6l/Cpe  |
| GO_BP_m1GO:00718Eresponse tr   | 6/2606  | 23/23843  | 0.033344 | 0.447571 | 0.425591 | Akap6/Atp   |
| GO_BP_m1GO:00722Ccell differer | 6/2606  | 23/23843  | 0.033344 | 0.447571 | 0.425591 | Gdnf/Lamk   |
| GO_BP_m1GO:19029Epositive re   | 6/2606  | 23/23843  | 0.033344 | 0.447571 | 0.425591 | Adcyap1r1   |
| GO_BP_m1GO:00715Eresponse tr   | 29/2606 | 187/23843 | 0.033499 | 0.447571 | 0.425591 | Ankrd1/Car  |
| GO_BP_m1GO:000672terpenoid r   | 11/2606 | 55/23843  | 0.033669 | 0.447571 | 0.425591 | Adh1/AdhE   |
| GO_BP_m1GO:19031Eregulation    | 24/2606 | 149/23843 | 0.033756 | 0.447571 | 0.425591 | Adra1d/Ak   |
| GO_BP_m1GO:00003E RNA spli     | 4/2606  | 12/23843  | 0.034316 | 0.447571 | 0.425591 | Rtraf/Tsen2 |
| GO_BP_m1GO:00108Enegative re   | 4/2606  | 12/23843  | 0.034316 | 0.447571 | 0.425591 | Kat2a/Kat2  |
| GO_BP_m1GO:00108Eregulation    | 4/2606  | 12/23843  | 0.034316 | 0.447571 | 0.425591 | Fitm1/Osby  |
| GO_BP_m1GO:00199EcGMP-mec      | 4/2606  | 12/23843  | 0.034316 | 0.447571 | 0.425591 | Cd36/Ednr   |
| GO_BP_m1GO:003191positive re   | 4/2606  | 12/23843  | 0.034316 | 0.447571 | 0.425591 | Cdc20/Cfl1  |
| GO_BP_m1GO:004347pigment ac    | 4/2606  | 12/23843  | 0.034316 | 0.447571 | 0.425591 | Bloc1s5/Cc  |
| GO_BP_m1GO:00469Enegative re   | 4/2606  | 12/23843  | 0.034316 | 0.447571 | 0.425591 | Fmr1/Htr6/  |
| GO_BP_m1GO:00603Enegative re   | 4/2606  | 12/23843  | 0.034316 | 0.447571 | 0.425591 | Nog/Pbld1   |
| GO_BP_m1GO:00614Eregulation    | 4/2606  | 12/23843  | 0.034316 | 0.447571 | 0.425591 | Men1/Nr4E   |
| GO_BP_m1GO:007097interleukin-4 | 2606    | 12/23843  | 0.034316 | 0.447571 | 0.425591 | Abl2/Btnl2, |
| GO_BP_m1GO:00904Ecatecholarr   | 4/2606  | 12/23843  | 0.034316 | 0.447571 | 0.425591 | Gdnf/Park2  |
| GO_BP_m1GO:00904Edopamine      | 4/2606  | 12/23843  | 0.034316 | 0.447571 | 0.425591 | Gdnf/Park2  |
| GO_BP_m1GO:19036Eregulation    | 4/2606  | 12/23843  | 0.034316 | 0.447571 | 0.425591 | Aifm1/Dffa  |
| GO_BP_m1GO:200001regulation    | 4/2606  | 12/23843  | 0.034316 | 0.447571 | 0.425591 | Dmrt1/Nr5   |

|                   |              |         |           |          |          |          |            |
|-------------------|--------------|---------|-----------|----------|----------|----------|------------|
| GO_BP_m1GO:200062 | regulation   | 4/2606  | 12/23843  | 0.034316 | 0.447571 | 0.425591 | Khsrp/Nfkb |
| GO_BP_m1GO:003462 | cellular res | 15/2606 | 83/23843  | 0.03436  | 0.447571 | 0.425591 | Atf3/Bok/C |
| GO_BP_m1GO:000924 | glycolipid t | 12/2606 | 62/23843  | 0.034393 | 0.447571 | 0.425591 | Abo/B4gal  |
| GO_BP_m1GO:004514 | homologot    | 12/2606 | 62/23843  | 0.034393 | 0.447571 | 0.425591 | Terb1/Ccne |
| GO_BP_m1GO:200037 | negative re  | 12/2606 | 62/23843  | 0.034393 | 0.447571 | 0.425591 | Atp2b4/Bcl |
| GO_BP_m1GO:004864 | animal org   | 13/2606 | 69/23843  | 0.034684 | 0.450501 | 0.428378 | Fgf1/Gdnf/ |
| GO_BP_m1GO:000616 | purine nuc   | 61/2606 | 443/23843 | 0.034747 | 0.450501 | 0.428378 | Adcy4/Adk  |
| GO_BP_m1GO:004828 | organelle fi | 28/2606 | 180/23843 | 0.034961 | 0.450501 | 0.428378 | Ankfy1/An  |
| GO_BP_m1GO:003080 | negative re  | 9/2606  | 42/23843  | 0.034977 | 0.450501 | 0.428378 | Adra1d/Ak  |
| GO_BP_m1GO:004222 | response tr  | 9/2606  | 42/23843  | 0.034977 | 0.450501 | 0.428378 | Abat/Adra1 |
| GO_BP_m1GO:004230 | positive re  | 9/2606  | 42/23843  | 0.034977 | 0.450501 | 0.428378 | Cdk1/Hyal1 |
| GO_BP_m1GO:190037 | negative re  | 9/2606  | 42/23843  | 0.034977 | 0.450501 | 0.428378 | Adra1d/Ak  |
| GO_BP_m1GO:009010 | negative re  | 18/2606 | 105/23843 | 0.035412 | 0.45484  | 0.432503 | Cav1/Danc  |
| GO_BP_m1GO:005148 | regulation   | 48/2606 | 338/23843 | 0.035418 | 0.45484  | 0.432503 | Abl2/Adcy4 |
| GO_BP_m1GO:001593 | nucleobase   | 29/2606 | 188/23843 | 0.035617 | 0.456058 | 0.433662 | Adora1/Ah  |
| GO_BP_m1GO:003461 | response tr  | 29/2606 | 188/23843 | 0.035617 | 0.456058 | 0.433662 | Ankrd1/Ca  |
| GO_BP_m1GO:001963 | ribose pho   | 62/2606 | 452/23843 | 0.035867 | 0.458592 | 0.436071 | Adcy4/Adn  |
| GO_BP_m1GO:003310 | positive re  | 20/2606 | 120/23843 | 0.036172 | 0.461818 | 0.439139 | Atp2b4/Bcl |
| GO_BP_m1GO:000301 | renal syste  | 17/2606 | 98/23843  | 0.036301 | 0.462121 | 0.439427 | Adm/Ador   |
| GO_BP_m1GO:000609 | pyruvate r   | 17/2606 | 98/23843  | 0.036301 | 0.462121 | 0.439427 | Bpgm/Eno1  |
| GO_BP_m1GO:001033 | response tr  | 10/2606 | 49/23843  | 0.036831 | 0.468192 | 0.445199 | Apobec1/A  |
| GO_BP_m1GO:007200 | renal syste  | 42/2606 | 291/23843 | 0.037231 | 0.472598 | 0.449389 | Adamts1/A  |
| GO_BP_m1GO:003110 | microtubul   | 19/2606 | 113/23843 | 0.037332 | 0.473052 | 0.449821 | Ankrd53/C  |
| GO_BP_m1GO:000663 | unsaturate   | 8/2606  | 36/23843  | 0.037428 | 0.473052 | 0.449821 | Alox12/Av  |
| GO_BP_m1GO:003022 | macrophag    | 8/2606  | 36/23843  | 0.037428 | 0.473052 | 0.449821 | Casp8/Ceb  |
| GO_BP_m1GO:000931 | response tr  | 54/2606 | 388/23843 | 0.037725 | 0.475159 | 0.451825 | Abl2/Adar  |
| GO_BP_m1GO:009706 | dendritic s  | 15/2606 | 84/23843  | 0.037757 | 0.475159 | 0.451825 | Abl2/Arhg  |
| GO_BP_m1GO:190595 | positive re  | 15/2606 | 84/23843  | 0.037757 | 0.475159 | 0.451825 | Abca12/An  |
| GO_BP_m1GO:009719 | extrinsic a  | 34/2606 | 228/23843 | 0.037885 | 0.475716 | 0.452355 | Atf3/Bok/C |
| GO_BP_m1GO:009039 | cellular sen | 11/2606 | 56/23843  | 0.03791  | 0.475716 | 0.452355 | 1500015O   |
| GO_BP_m1GO:007233 | monocarbc    | 35/2606 | 236/23843 | 0.03817  | 0.478302 | 0.454813 | Abat/Abcd  |
| GO_BP_m1GO:000300 | regionaliza  | 51/2606 | 364/23843 | 0.03827  | 0.478621 | 0.455117 | Abi1/Btg2/ |
| GO_BP_m1GO:003460 | cellular res | 12/2606 | 63/23843  | 0.038414 | 0.478621 | 0.455117 | Ano1/Clpb  |
| GO_BP_m1GO:006099 | dendritic s  | 12/2606 | 63/23843  | 0.038414 | 0.478621 | 0.455117 | Arhgap44/  |
| GO_BP_m1GO:190160 | alpha-amir   | 12/2606 | 63/23843  | 0.038414 | 0.478621 | 0.455117 | Apip/Atp2b |
| GO_BP_m1GO:000742 | peripheral   | 13/2606 | 70/23843  | 0.038489 | 0.478873 | 0.455356 | Ahnak2/Cc  |
| GO_BP_m1GO:000686 | amino acid   | 22/2606 | 136/23843 | 0.039077 | 0.479602 | 0.45605  | Abat/Ador  |
| GO_BP_m1GO:003563 | multicellul  | 22/2606 | 136/23843 | 0.039077 | 0.479602 | 0.45605  | Ahnak2/Av  |
| GO_BP_m1GO:190331 | regulation   | 32/2606 | 213/23843 | 0.039308 | 0.479602 | 0.45605  | Apobec1/B  |
| GO_BP_m1GO:002160 | cranial nen  | 7/2606  | 30/23843  | 0.03944  | 0.479602 | 0.45605  | Atp8b1/Ep  |
| GO_BP_m1GO:001054 | negative re  | 5/2606  | 18/23843  | 0.039493 | 0.479602 | 0.45605  | Abat/Alox1 |
| GO_BP_m1GO:001581 | gamma-an     | 5/2606  | 18/23843  | 0.039493 | 0.479602 | 0.45605  | Abat/Hrh3, |
| GO_BP_m1GO:001890 | ether meta   | 5/2606  | 18/23843  | 0.039493 | 0.479602 | 0.45605  | Ephx2/Fasr |
| GO_BP_m1GO:002203 | corpus call  | 5/2606  | 18/23843  | 0.039493 | 0.479602 | 0.45605  | Cdk5/Ephb  |
| GO_BP_m1GO:004241 | norepinept   | 5/2606  | 18/23843  | 0.039493 | 0.479602 | 0.45605  | Ly6e/Park2 |
| GO_BP_m1GO:005086 | negative re  | 5/2606  | 18/23843  | 0.039493 | 0.479602 | 0.45605  | Btnl2/Dusp |
| GO_BP_m1GO:009002 | positive re  | 5/2606  | 18/23843  | 0.039493 | 0.479602 | 0.45605  | Ccr1/Cxcl1 |
| GO_BP_m1GO:190204 | positive re  | 5/2606  | 18/23843  | 0.039493 | 0.479602 | 0.45605  | Atf3/Nf1/S |

|                              |         |           |          |          |          |             |
|------------------------------|---------|-----------|----------|----------|----------|-------------|
| GO_BP_m1GO:007095neuron de   | 53/2606 | 381/23843 | 0.039518 | 0.479602 | 0.45605  | Aatk/Ache   |
| GO_BP_m1GO:001481muscle cell | 17/2606 | 99/23843  | 0.039529 | 0.479602 | 0.45605  | Dock4/Doc   |
| GO_BP_m1GO:004213neurotrans  | 17/2606 | 99/23843  | 0.039529 | 0.479602 | 0.45605  | Abat/Aldh5  |
| GO_BP_m1GO:003053adult beha  | 28/2606 | 182/23843 | 0.039541 | 0.479602 | 0.45605  | Abat/Abl2/  |
| GO_BP_m1GO:005080regulation  | 28/2606 | 182/23843 | 0.039541 | 0.479602 | 0.45605  | Arhgap44/   |
| GO_BP_m1GO:200037regulation  | 28/2606 | 182/23843 | 0.039541 | 0.479602 | 0.45605  | Atp2b4/Bcl  |
| GO_BP_m1GO:000915purine ribo | 59/2606 | 430/23843 | 0.039585 | 0.479602 | 0.45605  | Adcy4/Adn   |
| GO_BP_m1GO:200125regulation  | 25/2606 | 159/23843 | 0.039689 | 0.480206 | 0.456624 | Adra1d/Ak   |
| GO_BP_m1GO:003053male genit  | 6/2606  | 24/23843  | 0.040477 | 0.48308  | 0.459356 | Asb1/Hsd1   |
| GO_BP_m1GO:003128negative re | 6/2606  | 24/23843  | 0.040477 | 0.48308  | 0.459356 | Adra1d/Ak   |
| GO_BP_m1GO:004247middle ear  | 6/2606  | 24/23843  | 0.040477 | 0.48308  | 0.459356 | Myc/Nog/C   |
| GO_BP_m1GO:004392modulator   | 6/2606  | 24/23843  | 0.040477 | 0.48308  | 0.459356 | Ccl4/Hdac3  |
| GO_BP_m1GO:004434type B pan  | 6/2606  | 24/23843  | 0.040477 | 0.48308  | 0.459356 | Adk/Igfbp3  |
| GO_BP_m1GO:005231modulator   | 6/2606  | 24/23843  | 0.040477 | 0.48308  | 0.459356 | Ccl4/Hdac3  |
| GO_BP_m1GO:005247modulator   | 6/2606  | 24/23843  | 0.040477 | 0.48308  | 0.459356 | Ccl4/Hdac3  |
| GO_BP_m1GO:005502negative re | 6/2606  | 24/23843  | 0.040477 | 0.48308  | 0.459356 | Cav3/Hdac   |
| GO_BP_m1GO:006111negative re | 6/2606  | 24/23843  | 0.040477 | 0.48308  | 0.459356 | Cav3/Hdac   |
| GO_BP_m1GO:007186response tr | 6/2606  | 24/23843  | 0.040477 | 0.48308  | 0.459356 | Akap6/Atp   |
| GO_BP_m1GO:009753granulocyt  | 21/2606 | 129/23843 | 0.040572 | 0.483558 | 0.459811 | Adam8/Ccl   |
| GO_BP_m1GO:004508positive re | 30/2606 | 198/23843 | 0.040687 | 0.48428  | 0.460498 | 5730559C1   |
| GO_BP_m1GO:004547response tr | 15/2606 | 85/23843  | 0.04139  | 0.49197  | 0.46781  | Abat/Adh1   |
| GO_BP_m1GO:005133regulation  | 10/2606 | 50/23843  | 0.041695 | 0.494925 | 0.47062  | Adra1d/Ak   |
| GO_BP_m1GO:005507calcium ior | 61/2606 | 448/23843 | 0.042053 | 0.497019 | 0.472611 | Abl2/Adcy4  |
| GO_BP_m1GO:000663acyl-CoA n  | 14/2606 | 78/23843  | 0.042097 | 0.497019 | 0.472611 | Acot1/Aco1  |
| GO_BP_m1GO:003538thioester r | 14/2606 | 78/23843  | 0.042097 | 0.497019 | 0.472611 | Acot1/Aco1  |
| GO_BP_m1GO:004636monosacch   | 14/2606 | 78/23843  | 0.042097 | 0.497019 | 0.472611 | Atf3/Bpgm   |
| GO_BP_m1GO:004327negative re | 25/2606 | 160/23843 | 0.042336 | 0.498025 | 0.473568 | Abat/Adora  |
| GO_BP_m1GO:000925ribonucleo  | 60/2606 | 440/23843 | 0.042395 | 0.498025 | 0.473568 | Adcy4/Adn   |
| GO_BP_m1GO:000751skeletal m  | 29/2606 | 191/23843 | 0.042577 | 0.498025 | 0.473568 | Acta1/Ankr  |
| GO_BP_m1GO:003150protein-co  | 29/2606 | 191/23843 | 0.042577 | 0.498025 | 0.473568 | Akap6/Arh   |
| GO_BP_m1GO:001974secondary   | 13/2606 | 71/23843  | 0.042579 | 0.498025 | 0.473568 | Akr1c12/A   |
| GO_BP_m1GO:005188regulation  | 13/2606 | 71/23843  | 0.042579 | 0.498025 | 0.473568 | Alox12/Arl  |
| GO_BP_m1GO:190331positive re | 13/2606 | 71/23843  | 0.042579 | 0.498025 | 0.473568 | Apobec1/B   |
| GO_BP_m1GO:005178negative re | 12/2606 | 64/23843  | 0.042754 | 0.4994   | 0.474876 | Dmrt1/Fbx   |
| GO_BP_m1GO:002260digestive s | 17/2606 | 100/23843 | 0.042959 | 0.501137 | 0.476527 | 5730559C1   |
| GO_BP_m1GO:004349protein kin | 26/2606 | 168/23843 | 0.043177 | 0.502846 | 0.478152 | Adam8/C1    |
| GO_BP_m1GO:000673NADP met    | 8/2606  | 37/23843  | 0.043342 | 0.502846 | 0.478152 | Bpgm/Fmc    |
| GO_BP_m1GO:004616alcohol cat | 8/2606  | 37/23843  | 0.043342 | 0.502846 | 0.478152 | Adh1/Adh5   |
| GO_BP_m1GO:190533positive re | 8/2606  | 37/23843  | 0.043342 | 0.502846 | 0.478152 | Gdnf/Lgr4/  |
| GO_BP_m1GO:000028nuclear div | 57/2606 | 416/23843 | 0.043392 | 0.502846 | 0.478152 | Ankrd53/B   |
| GO_BP_m1GO:000688ER to Golgi | 19/2606 | 115/23843 | 0.043602 | 0.504226 | 0.479464 | Bcap29/Bc   |
| GO_BP_m1GO:004364dicarboxyli | 16/2606 | 93/23843  | 0.044162 | 0.504226 | 0.479464 | Dglucy/Ad   |
| GO_BP_m1GO:190547positive re | 16/2606 | 93/23843  | 0.044162 | 0.504226 | 0.479464 | Cdk5/Cib1   |
| GO_BP_m1GO:001598energy der  | 36/2606 | 247/23843 | 0.044788 | 0.504226 | 0.479464 | Bnip3/Cdk   |
| GO_BP_m1GO:002241cellular pr | 51/2606 | 368/23843 | 0.045189 | 0.504226 | 0.479464 | Acrbp/Amt   |
| GO_BP_m1GO:000165metaneph    | 15/2606 | 86/23843  | 0.045264 | 0.504226 | 0.479464 | Aph1a/Fbn   |
| GO_BP_m1GO:000626DNA ligati  | 4/2606  | 13/23843  | 0.045386 | 0.504226 | 0.479464 | Aplf/Aptx/l |
| GO_BP_m1GO:000732inseminati  | 4/2606  | 13/23843  | 0.045386 | 0.504226 | 0.479464 | Avpr1a/Dd   |



|                   |                                |           |          |          |          |             |
|-------------------|--------------------------------|-----------|----------|----------|----------|-------------|
| GO_BP_m1GO:001022 | response to 4/2606             | 13/23843  | 0.045386 | 0.504226 | 0.479464 | Ei24/Ercc5/ |
| GO_BP_m1GO:001821 | peptidyl-arr 4/2606            | 13/23843  | 0.045386 | 0.504226 | 0.479464 | Ndufaf7/Pr  |
| GO_BP_m1GO:003581 | positive regulation of 4/2606  | 13/23843  | 0.045386 | 0.504226 | 0.479464 | Avpr1a/Drc  |
| GO_BP_m1GO:004479 | negative regulation of 4/2606  | 13/23843  | 0.045386 | 0.504226 | 0.479464 | Mptx2/Parl  |
| GO_BP_m1GO:004583 | negative regulation of 4/2606  | 13/23843  | 0.045386 | 0.504226 | 0.479464 | Dmrt1/Fbx   |
| GO_BP_m1GO:004660 | negative regulation of 4/2606  | 13/23843  | 0.045386 | 0.504226 | 0.479464 | Kat2a/Kat2  |
| GO_BP_m1GO:007221 | positive regulation of 4/2606  | 13/23843  | 0.045386 | 0.504226 | 0.479464 | Gdnf/Myc/   |
| GO_BP_m1GO:007269 | protein localization 4/2606    | 13/23843  | 0.045386 | 0.504226 | 0.479464 | Epb41/Ezr/  |
| GO_BP_m1GO:009959 | neurotransmission 4/2606       | 13/23843  | 0.045386 | 0.504226 | 0.479464 | Cacng5/Ca   |
| GO_BP_m1GO:190504 | regulation of 4/2606           | 13/23843  | 0.045386 | 0.504226 | 0.479464 | Antxr1/Ddr  |
| GO_BP_m1GO:190594 | positive regulation of 4/2606  | 13/23843  | 0.045386 | 0.504226 | 0.479464 | Dmrt1/Nr5   |
| GO_BP_m1GO:200010 | positive regulation of 4/2606  | 13/23843  | 0.045386 | 0.504226 | 0.479464 | Cdc7/Cdk2   |
| GO_BP_m1GO:200065 | negative regulation of 4/2606  | 13/23843  | 0.045386 | 0.504226 | 0.479464 | Drd3/Hecw   |
| GO_BP_m1GO:000072 | non-recombinant 9/2606         | 44/23843  | 0.045704 | 0.504226 | 0.479464 | Dclre1a/De  |
| GO_BP_m1GO:003304 | negative regulation of 9/2606  | 44/23843  | 0.045704 | 0.504226 | 0.479464 | Klhl22/Mac  |
| GO_BP_m1GO:004303 | regulation of 9/2606           | 44/23843  | 0.045704 | 0.504226 | 0.479464 | Cd200/Ill10 |
| GO_BP_m1GO:004848 | synaptic vesicle 9/2606        | 44/23843  | 0.045704 | 0.504226 | 0.479464 | Canx/Cdk5   |
| GO_BP_m1GO:000721 | Notch signaling 26/2606        | 169/23843 | 0.04592  | 0.504226 | 0.479464 | Aph1a/Aph   |
| GO_BP_m1GO:001571 | monocarbonyl 23/2606           | 146/23843 | 0.046096 | 0.504226 | 0.479464 | Abat/Abcc3  |
| GO_BP_m1GO:003304 | regulation of 14/2606          | 79/23843  | 0.046218 | 0.504226 | 0.479464 | Cdc23/Fen   |
| GO_BP_m1GO:000202 | regulation of 7/2606           | 31/23843  | 0.046308 | 0.504226 | 0.479464 | Adm/Atp2b1  |
| GO_BP_m1GO:000650 | GPI anchor 7/2606              | 31/23843  | 0.046308 | 0.504226 | 0.479464 | Pgap1/Pga   |
| GO_BP_m1GO:000697 | hyperosmolarity 7/2606         | 31/23843  | 0.046308 | 0.504226 | 0.479464 | Mir7b/Mir9  |
| GO_BP_m1GO:001066 | positive regulation of 7/2606  | 31/23843  | 0.046308 | 0.504226 | 0.479464 | Bnip3/Cam   |
| GO_BP_m1GO:007088 | regulation of 7/2606           | 31/23843  | 0.046308 | 0.504226 | 0.479464 | Akap6/Atp   |
| GO_BP_m1GO:010605 | regulation of 7/2606           | 31/23843  | 0.046308 | 0.504226 | 0.479464 | Akap6/Atp   |
| GO_BP_m1GO:190189 | positive regulation of 7/2606  | 31/23843  | 0.046308 | 0.504226 | 0.479464 | Cav1/Cfl1/  |
| GO_BP_m1GO:005118 | cofactor binding 32/2606       | 216/23843 | 0.046313 | 0.504226 | 0.479464 | Bdh2/Bpgr   |
| GO_BP_m1GO:006107 | chaperone 13/2606              | 72/23843  | 0.046965 | 0.504226 | 0.479464 | Calr/Canx1/ |
| GO_BP_m1GO:000702 | endoplasmic 10/2606            | 51/23843  | 0.046979 | 0.504226 | 0.479464 | Jagn1/Pex5  |
| GO_BP_m1GO:001082 | negative regulation of 10/2606 | 51/23843  | 0.046979 | 0.504226 | 0.479464 | Bnip3/Bok/  |
| GO_BP_m1GO:005156 | histone H3 10/2606             | 51/23843  | 0.046979 | 0.504226 | 0.479464 | Ash2l/H2af  |
| GO_BP_m1GO:004340 | negative regulation of 24/2606 | 154/23843 | 0.047122 | 0.504226 | 0.479464 | Atf3/Camk   |
| GO_BP_m1GO:000914 | purine nucleotide 37/2606      | 256/23843 | 0.047154 | 0.504226 | 0.479464 | Adk/Atp5a   |
| GO_BP_m1GO:006024 | anatomical 50/2606             | 361/23843 | 0.047352 | 0.504226 | 0.479464 | 5730559C1   |
| GO_BP_m1GO:000854 | visual learning 12/2606        | 65/23843  | 0.047423 | 0.504226 | 0.479464 | Abl2/Adar   |
| GO_BP_m1GO:004577 | negative regulation of 11/2606 | 58/23843  | 0.047479 | 0.504226 | 0.479464 | Abat/Adora  |
| GO_BP_m1GO:004663 | positive regulation of 11/2606 | 58/23843  | 0.047479 | 0.504226 | 0.479464 | Blm/Cd80/   |
| GO_BP_m1GO:005043 | regulation of 11/2606          | 58/23843  | 0.047479 | 0.504226 | 0.479464 | Abat/Adra   |
| GO_BP_m1GO:009018 | regulation of 11/2606          | 58/23843  | 0.047479 | 0.504226 | 0.479464 | Fln/Gdnf/   |
| GO_BP_m1GO:005165 | establishment 29/2606          | 193/23843 | 0.047747 | 0.504226 | 0.479464 | Bloc1s5/Cc  |
| GO_BP_m1GO:000002 | mitotic spindle 3/2606         | 8/23843   | 0.047906 | 0.504226 | 0.479464 | Kif23/Kif4/ |
| GO_BP_m1GO:001076 | negative regulation of 3/2606  | 8/23843   | 0.047906 | 0.504226 | 0.479464 | D1Ertd622   |
| GO_BP_m1GO:001991 | peptidyl-arr 3/2606            | 8/23843   | 0.047906 | 0.504226 | 0.479464 | Prmt1/Prm   |
| GO_BP_m1GO:003418 | regulation of 3/2606           | 8/23843   | 0.047906 | 0.504226 | 0.479464 | H2afy/Naa   |
| GO_BP_m1GO:003449 | early endosome 3/2606          | 8/23843   | 0.047906 | 0.504226 | 0.479464 | Rbsn/Snx2,  |
| GO_BP_m1GO:003594 | regulation of 3/2606           | 8/23843   | 0.047906 | 0.504226 | 0.479464 | Kat2a/Kat2  |
| GO_BP_m1GO:004482 | meiotic telomere 3/2606        | 8/23843   | 0.047906 | 0.504226 | 0.479464 | Terb1/Lem   |

|                   |              |          |           |          |          |          |              |
|-------------------|--------------|----------|-----------|----------|----------|----------|--------------|
| GO_BP_m1GO:00480  | positive re  | 3/2606   | 8/23843   | 0.047906 | 0.504226 | 0.479464 | Adamts9/B    |
| GO_BP_m1GO:005134 | regulation   | 3/2606   | 8/23843   | 0.047906 | 0.504226 | 0.479464 | Gclm/Ripk    |
| GO_BP_m1GO:00609  | positive re  | 3/2606   | 8/23843   | 0.047906 | 0.504226 | 0.479464 | Cd36/Gprc    |
| GO_BP_m1GO:00610  | negative re  | 3/2606   | 8/23843   | 0.047906 | 0.504226 | 0.479464 | Cav3/Pak1    |
| GO_BP_m1GO:00701  | meiotic att  | 3/2606   | 8/23843   | 0.047906 | 0.504226 | 0.479464 | Terb1/Lem    |
| GO_BP_m1GO:007144 | cellular res | 3/2606   | 8/23843   | 0.047906 | 0.504226 | 0.479464 | Cd36/Dap     |
| GO_BP_m1GO:00714  | cellular res | 3/2606   | 8/23843   | 0.047906 | 0.504226 | 0.479464 | Cdkn1a/Hy    |
| GO_BP_m1GO:00722  | metaneph     | 3/2606   | 8/23843   | 0.047906 | 0.504226 | 0.479464 | Osr1/Pdgfr   |
| GO_BP_m1GO:007231 | vesicle unc  | 3/2606   | 8/23843   | 0.047906 | 0.504226 | 0.479464 | Dnajc6/Sh    |
| GO_BP_m1GO:009724 | chromosor    | 3/2606   | 8/23843   | 0.047906 | 0.504226 | 0.479464 | Terb1/Lem    |
| GO_BP_m1GO:00975  | stress resp  | 3/2606   | 8/23843   | 0.047906 | 0.504226 | 0.479464 | Mt2/Mt3/S    |
| GO_BP_m1GO:190011 | extracellula | 3/2606   | 8/23843   | 0.047906 | 0.504226 | 0.479464 | Dand5/Fbr    |
| GO_BP_m1GO:190011 | extracellula | 3/2606   | 8/23843   | 0.047906 | 0.504226 | 0.479464 | Dand5/Fbr    |
| GO_BP_m1GO:190162 | regulation   | 3/2606   | 8/23843   | 0.047906 | 0.504226 | 0.479464 | Prkacb/Tra   |
| GO_BP_m1GO:19018  | positive re  | 3/2606   | 8/23843   | 0.047906 | 0.504226 | 0.479464 | Cdk1/Myc/    |
| GO_BP_m1GO:19022  | positive re  | 3/2606   | 8/23843   | 0.047906 | 0.504226 | 0.479464 | Bok/Nck2/!   |
| GO_BP_m1GO:00090  | fatty acid c | 16/2606  | 94/23843  | 0.048034 | 0.504226 | 0.479464 | Abcd3/Ab     |
| GO_BP_m1GO:003081 | negative re  | 6/2606   | 25/23843  | 0.048502 | 0.504226 | 0.479464 | Adra1d/Ak    |
| GO_BP_m1GO:003287 | regulation   | 6/2606   | 25/23843  | 0.048502 | 0.504226 | 0.479464 | Bcas3/Cfl1   |
| GO_BP_m1GO:003327 | response tr  | 6/2606   | 25/23843  | 0.048502 | 0.504226 | 0.479464 | Bche/Cyp2    |
| GO_BP_m1GO:00354  | response tr  | 6/2606   | 25/23843  | 0.048502 | 0.504226 | 0.479464 | Eif2ak2/Ifit |
| GO_BP_m1GO:006121 | positive re  | 6/2606   | 25/23843  | 0.048502 | 0.504226 | 0.479464 | Gdnf/Lgr4/   |
| GO_BP_m1GO:000664 | membrane     | 26/2606  | 170/23843 | 0.048789 | 0.504226 | 0.479464 | Abo/Acer3    |
| GO_BP_m1GO:00069  | pinocytosis  | 5/2606   | 19/23843  | 0.048926 | 0.504226 | 0.479464 | Ankfy1/Cav   |
| GO_BP_m1GO:19047  | vascular as  | 5/2606   | 19/23843  | 0.048926 | 0.504226 | 0.479464 | Dock4/Doc    |
| GO_BP_m1GO:19047  | regulation   | 5/2606   | 19/23843  | 0.048926 | 0.504226 | 0.479464 | Dock4/Doc    |
| GO_BP_m1GO:190552 | positive re  | 5/2606   | 19/23843  | 0.048926 | 0.504226 | 0.479464 | Cxcl17/Kar   |
| GO_BP_m1GO:004001 | negative re  | 43/2606  | 305/23843 | 0.048992 | 0.504226 | 0.479464 | Adamts9/A    |
| GO_BP_m1GO:00430  | regulation   | 41/2606  | 289/23843 | 0.049278 | 0.504226 | 0.479464 | Arhgap44/    |
| GO_BP_m1GO:00450  | regulation   | 35/2606  | 241/23843 | 0.04938  | 0.504226 | 0.479464 | 5730559C1    |
| GO_BP_m1GO:00149  | smooth mt    | 15/2606  | 87/23843  | 0.049386 | 0.504226 | 0.479464 | Dock4/Doc    |
| GO_BP_m1GO:003444 | substrate a  | 15/2606  | 87/23843  | 0.049386 | 0.504226 | 0.479464 | Antxr1/Bca   |
| GO_BP_m1GO:010602 | neuron prc   | 15/2606  | 87/23843  | 0.049386 | 0.504226 | 0.479464 | Abl2/Arhg    |
| GO_BP_m1GO:00458  | positive re  | 59/2606  | 436/23843 | 0.049599 | 0.504226 | 0.479464 | 5730559C1    |
| GO_BP_m1GO:007221 | metaneph     | 8/2606   | 38/23843  | 0.04984  | 0.504226 | 0.479464 | Gdnf/Irx2/l  |
| GO_BP_m1GO:00508  | regulation   | 29/2606  | 194/23843 | 0.050499 | 0.504226 | 0.479464 | Arhgap44/    |
| GO_BP_m1GO:00609  | dendritic s  | 19/2606  | 117/23843 | 0.050597 | 0.504226 | 0.479464 | Arhgap44/    |
| GO_BP_m1GO:00986  | anion trans  | 30/2606  | 202/23843 | 0.050895 | 0.504226 | 0.479464 | Abcb1a/Ar    |
| GO_BP_m1GO:00315  | cell-substr  | 43/2606  | 306/23843 | 0.05119  | 0.504226 | 0.479464 | Adam8/Ad     |
| GO_BP_m1GO:000221 | activation   | c22/2606 | 140/23843 | 0.051382 | 0.504226 | 0.479464 | 5730559C1    |
| GO_BP_m1GO:00071  | G-protein    | c32/2606 | 218/23843 | 0.051471 | 0.504226 | 0.479464 | Adcy4/Adc    |
| GO_BP_m1GO:190402 | regulation   | 13/2606  | 73/23843  | 0.051654 | 0.504226 | 0.479464 | Blm/Camk     |
| GO_BP_m1GO:00016  | temperatur   | 9/2606   | 45/23843  | 0.051808 | 0.504226 | 0.479464 | Abat/Ador    |
| GO_BP_m1GO:007124 | cellular res | 9/2606   | 45/23843  | 0.051808 | 0.504226 | 0.479464 | Aoc1/Casp    |
| GO_BP_m1GO:009032 | regulation   | 9/2606   | 45/23843  | 0.051808 | 0.504226 | 0.479464 | Blm/Cdc7/!   |
| GO_BP_m1GO:00356  | cellular res | 48/2606  | 347/23843 | 0.052013 | 0.504226 | 0.479464 | Ankrd1/Bc    |
| GO_BP_m1GO:00451  | meiotic chr  | 16/2606  | 95/23843  | 0.052138 | 0.504226 | 0.479464 | Terb1/Ccne   |
| GO_BP_m1GO:00509  | neuromusc    | 20/2606  | 125/23843 | 0.052222 | 0.504226 | 0.479464 | Abl2/Aldh1   |

|                               |         |           |          |          |          |             |
|-------------------------------|---------|-----------|----------|----------|----------|-------------|
| GO_BP_m1GO:001633morphogen    | 27/2606 | 179/23843 | 0.052408 | 0.504226 | 0.479464 | Abl2/Adm/   |
| GO_BP_m1GO:003096endoplasm    | 12/2606 | 66/23843  | 0.052429 | 0.504226 | 0.479464 | Atf3/Bok/C  |
| GO_BP_m1GO:005129centrosom    | 12/2606 | 66/23843  | 0.052429 | 0.504226 | 0.479464 | Deup1/Cd    |
| GO_BP_m1GO:004864negative re  | 18/2606 | 110/23843 | 0.052554 | 0.504226 | 0.479464 | Aatk/Bbs2/  |
| GO_BP_m1GO:000761mating       | 10/2606 | 52/23843  | 0.052695 | 0.504226 | 0.479464 | Abat/Avpr1  |
| GO_BP_m1GO:007009chemokine    | 10/2606 | 52/23843  | 0.052695 | 0.504226 | 0.479464 | Ccl20/Ccl2: |
| GO_BP_m1GO:001936arachidonic  | 11/2606 | 59/23843  | 0.052829 | 0.504226 | 0.479464 | Alox12/Alo  |
| GO_BP_m1GO:003133regulation   | 11/2606 | 59/23843  | 0.052829 | 0.504226 | 0.479464 | Anxa2/Sgs1  |
| GO_BP_m1GO:007023T cell apop  | 11/2606 | 59/23843  | 0.052829 | 0.504226 | 0.479464 | Adam8/Bln   |
| GO_BP_m1GO:009700regulation   | 11/2606 | 59/23843  | 0.052829 | 0.504226 | 0.479464 | Anxa2/Cd3   |
| GO_BP_m1GO:004863regulation   | 51/2606 | 372/23843 | 0.053013 | 0.504226 | 0.479464 | Aatk/Akap6  |
| GO_BP_m1GO:002176limbic syst  | 15/2606 | 88/23843  | 0.053764 | 0.504226 | 0.479464 | Aldh1a3/Bl  |
| GO_BP_m1GO:000630DNA catab    | 7/2606  | 32/23843  | 0.053894 | 0.504226 | 0.479464 | Aifm1/Dffa  |
| GO_BP_m1GO:000650GPI anchor   | 7/2606  | 32/23843  | 0.053894 | 0.504226 | 0.479464 | Pgap1/Pga   |
| GO_BP_m1GO:000676water-solu   | 7/2606  | 32/23843  | 0.053894 | 0.504226 | 0.479464 | Acpp/Clybl  |
| GO_BP_m1GO:000677fat-soluble  | 7/2606  | 32/23843  | 0.053894 | 0.504226 | 0.479464 | Crabp1/Cy   |
| GO_BP_m1GO:000693muscle cor   | 40/2606 | 283/23843 | 0.054079 | 0.504226 | 0.479464 | Abat/Acta2  |
| GO_BP_m1GO:003497response tr  | 32/2606 | 219/23843 | 0.054202 | 0.504226 | 0.479464 | Aifm1/Atf3  |
| GO_BP_m1GO:005117import int   | 25/2606 | 164/23843 | 0.054229 | 0.504226 | 0.479464 | 1700123L1   |
| GO_BP_m1GO:004306extracellula | 38/2606 | 267/23843 | 0.05435  | 0.504226 | 0.479464 | 2300002M:   |
| GO_BP_m1GO:000709centrosom    | 19/2606 | 118/23843 | 0.054378 | 0.504226 | 0.479464 | Deup1/Cd    |
| GO_BP_m1GO:004347pigmentati   | 17/2606 | 103/23843 | 0.054521 | 0.504226 | 0.479464 | Adamts9/B   |
| GO_BP_m1GO:005067regulation   | 47/2606 | 340/23843 | 0.054524 | 0.504226 | 0.479464 | A4gnt/Arg:  |
| GO_BP_m1GO:003514tube forma   | 26/2606 | 172/23843 | 0.054913 | 0.504226 | 0.479464 | Abl2/Adm/   |
| GO_BP_m1GO:007265protein loc  | 63/2606 | 472/23843 | 0.054966 | 0.504226 | 0.479464 | Abca12/Ac   |
| GO_BP_m1GO:000663fatty acid b | 20/2606 | 126/23843 | 0.055956 | 0.504226 | 0.479464 | Abcd3/Abf   |
| GO_BP_m1GO:000709mitotic cell | 20/2606 | 126/23843 | 0.055956 | 0.504226 | 0.479464 | Blm/Ccng1   |
| GO_BP_m1GO:002191neural tub   | 28/2606 | 188/23843 | 0.055961 | 0.504226 | 0.479464 | Abl2/Adm/   |
| GO_BP_m1GO:006034bone devel   | 29/2606 | 196/23843 | 0.056345 | 0.504226 | 0.479464 | Abi1/Alpl// |
| GO_BP_m1GO:003031flagellated  | 16/2606 | 96/23843  | 0.05648  | 0.504226 | 0.479464 | Atp2b4/Bb   |
| GO_BP_m1GO:007232monocarbc    | 18/2606 | 111/23843 | 0.05658  | 0.504226 | 0.479464 | Abat/Abcd   |
| GO_BP_m1GO:001605carbohydr    | 30/2606 | 204/23843 | 0.056647 | 0.504226 | 0.479464 | Adcyap1r1.  |
| GO_BP_m1GO:004328regulation   | 30/2606 | 204/23843 | 0.056647 | 0.504226 | 0.479464 | Aifm1/Alox  |
| GO_BP_m1GO:003320tumor necr   | 13/2606 | 74/23843  | 0.056653 | 0.504226 | 0.479464 | Ccdc3/Cldr  |
| GO_BP_m1GO:000268negative re  | 60/2606 | 448/23843 | 0.05669  | 0.504226 | 0.479464 | Adora1/Arq  |
| GO_BP_m1GO:007251divalent inc | 60/2606 | 448/23843 | 0.05669  | 0.504226 | 0.479464 | Adcyap1r1.  |
| GO_BP_m1GO:004576regulation   | 8/2606  | 39/23843  | 0.056936 | 0.504226 | 0.479464 | Adra1d/Ak   |
| GO_BP_m1GO:000165urogenital   | 46/2606 | 333/23843 | 0.057164 | 0.504226 | 0.479464 | Adamts1/A   |
| GO_BP_m1GO:005254regulation   | 55/2606 | 407/23843 | 0.057421 | 0.504226 | 0.479464 | Aifm1/Alox  |
| GO_BP_m1GO:002151spinal cord  | 6/2606  | 26/23843  | 0.05744  | 0.504226 | 0.479464 | Dbx1/Dll4/  |
| GO_BP_m1GO:003080negative re  | 6/2606  | 26/23843  | 0.05744  | 0.504226 | 0.479464 | Adra1d/Ak   |
| GO_BP_m1GO:003252microvillus  | 6/2606  | 26/23843  | 0.05744  | 0.504226 | 0.479464 | Atp8b1/Ezi  |
| GO_BP_m1GO:003292regulation   | 6/2606  | 26/23843  | 0.05744  | 0.504226 | 0.479464 | Dand5/Dm    |
| GO_BP_m1GO:004814behavioral   | 6/2606  | 26/23843  | 0.05744  | 0.504226 | 0.479464 | Abat/Adra:  |
| GO_BP_m1GO:004851spermatid    | 25/2606 | 165/23843 | 0.057542 | 0.504226 | 0.479464 | Acrbp/Bbs:  |
| GO_BP_m1GO:004814positive re  | 12/2606 | 67/23843  | 0.057782 | 0.504226 | 0.479464 | Anxa2/Cdk   |
| GO_BP_m1GO:000681calcium ior  | 54/2606 | 399/23843 | 0.057951 | 0.504226 | 0.479464 | Adcyap1r1.  |
| GO_BP_m1GO:000166fever gene   | 4/2606  | 14/23843  | 0.058206 | 0.504226 | 0.479464 | Ednrb/Il1rr |

|                                      |           |          |          |          |             |
|--------------------------------------|-----------|----------|----------|----------|-------------|
| GO_BP_m1GO:000666glycerol etl4/2606  | 14/23843  | 0.058206 | 0.504226 | 0.479464 | Fasn/Tmen   |
| GO_BP_m1GO:003065regulation 4/2606   | 14/23843  | 0.058206 | 0.504226 | 0.479464 | Clybl/Dgat  |
| GO_BP_m1GO:003953regulation 4/2606   | 14/23843  | 0.058206 | 0.504226 | 0.479464 | Ddx60/Dhx   |
| GO_BP_m1GO:006131renal filtrat4/2606 | 14/23843  | 0.058206 | 0.504226 | 0.479464 | Basp1/Jag1  |
| GO_BP_m1GO:007211glomerular4/2606    | 14/23843  | 0.058206 | 0.504226 | 0.479464 | Basp1/Jag1  |
| GO_BP_m1GO:007231glomerular4/2606    | 14/23843  | 0.058206 | 0.504226 | 0.479464 | Basp1/Jag1  |
| GO_BP_m1GO:007257neurotrans4/2606    | 14/23843  | 0.058206 | 0.504226 | 0.479464 | Gphn/Htr1   |
| GO_BP_m1GO:190230negative re4/2606   | 14/23843  | 0.058206 | 0.504226 | 0.479464 | Drd3/Hecw   |
| GO_BP_m1GO:004853spleen dev9/2606    | 46/23843  | 0.058421 | 0.504226 | 0.479464 | Cfc1/Onec   |
| GO_BP_m1GO:005198negative re9/2606   | 46/23843  | 0.058421 | 0.504226 | 0.479464 | Kihl22/Mac  |
| GO_BP_m1GO:000279negative re22/2606  | 142/23843 | 0.058478 | 0.504226 | 0.479464 | C1qtnf3/Ca  |
| GO_BP_m1GO:000715leukocyte c42/2606  | 301/23843 | 0.058537 | 0.504226 | 0.479464 | Adam8/Ad    |
| GO_BP_m1GO:004662positive re10/2606  | 53/23843  | 0.058854 | 0.504226 | 0.479464 | Akap6/Arx   |
| GO_BP_m1GO:000630double-str.28/2606  | 189/23843 | 0.059114 | 0.504226 | 0.479464 | Aplf/Aptx/f |
| GO_BP_m1GO:190303regulation 38/2606  | 269/23843 | 0.059547 | 0.504226 | 0.479464 | Adam8/Ad    |
| GO_BP_m1GO:000028nuclear-tra5/2606   | 20/23843  | 0.059569 | 0.504226 | 0.479464 | Btg2/Cpeb   |
| GO_BP_m1GO:001940alditol met.5/2606  | 20/23843  | 0.059569 | 0.504226 | 0.479464 | Angptl3/Cc  |
| GO_BP_m1GO:001943removal of5/2606    | 20/23843  | 0.059569 | 0.504226 | 0.479464 | Cd36/Fbln   |
| GO_BP_m1GO:002240cell cycle p5/2606  | 20/23843  | 0.059569 | 0.504226 | 0.479464 | Cdc20/Dek   |
| GO_BP_m1GO:009550acetylcholin5/2606  | 20/23843  | 0.059569 | 0.504226 | 0.479464 | Chrm1/Chr   |
| GO_BP_m1GO:190138negative re5/2606   | 20/23843  | 0.059569 | 0.504226 | 0.479464 | Adra1d/Frr  |
| GO_BP_m1GO:190383signal tran5/2606   | 20/23843  | 0.059569 | 0.504226 | 0.479464 | Chrm1/Chr   |
| GO_BP_m1GO:190514response tr5/2606   | 20/23843  | 0.059569 | 0.504226 | 0.479464 | Chrm1/Chr   |
| GO_BP_m1GO:190514cellular resj5/2606 | 20/23843  | 0.059569 | 0.504226 | 0.479464 | Chrm1/Chr   |
| GO_BP_m1GO:200031regulation 5/2606   | 20/23843  | 0.059569 | 0.504226 | 0.479464 | Cfl1/Crhbp  |
| GO_BP_m1GO:000912nucleoside 37/2606  | 261/23843 | 0.059724 | 0.504226 | 0.479464 | Adss/Atp5a  |
| GO_BP_m1GO:004603ATP metab32/2606    | 221/23843 | 0.059976 | 0.504226 | 0.479464 | Atp5a1/At   |
| GO_BP_m1GO:003111regulation 14/2606  | 82/23843  | 0.060249 | 0.504226 | 0.479464 | Ankrd53/C   |
| GO_BP_m1GO:000669icosanoid r18/2606  | 112/23843 | 0.060817 | 0.504226 | 0.479464 | Akr1c12/Al  |
| GO_BP_m1GO:004477cell cycle p52/2606 | 384/23843 | 0.061248 | 0.504226 | 0.479464 | Abcb1a/At   |
| GO_BP_m1GO:000071meiotic DN2/2606    | 4/23843   | 0.061645 | 0.504226 | 0.479464 | Sycp1/Sycp  |
| GO_BP_m1GO:000073DNA catab2/2606     | 4/23843   | 0.061645 | 0.504226 | 0.479464 | Eri1/Xrn2   |
| GO_BP_m1GO:000195intestinal D2/2606  | 4/23843   | 0.061645 | 0.504226 | 0.479464 | Ezr/Pls1    |
| GO_BP_m1GO:000199norepinepl2/2606    | 4/23843   | 0.061645 | 0.504226 | 0.479464 | Adra1d/Dri  |
| GO_BP_m1GO:000253arachidonic2/2606   | 4/23843   | 0.061645 | 0.504226 | 0.479464 | Alox5/Eph   |
| GO_BP_m1GO:000606ethanol oxi2/2606   | 4/23843   | 0.061645 | 0.504226 | 0.479464 | Adh1/Adh    |
| GO_BP_m1GO:000616purine ribo2/2606   | 4/23843   | 0.061645 | 0.504226 | 0.479464 | Adk/Aprt    |
| GO_BP_m1GO:000627leading str.2/2606  | 4/23843   | 0.061645 | 0.504226 | 0.479464 | Pcna/Pole   |
| GO_BP_m1GO:000693negative re2/2606   | 4/23843   | 0.061645 | 0.504226 | 0.479464 | Itgb1bp1/F  |
| GO_BP_m1GO:000720phospholip2/2606    | 4/23843   | 0.061645 | 0.504226 | 0.479464 | Chrm1/Chr   |
| GO_BP_m1GO:000982unidimensi2/2606    | 4/23843   | 0.061645 | 0.504226 | 0.479464 | Cadm1/Cfl   |
| GO_BP_m1GO:001584aminergic r2/2606   | 4/23843   | 0.061645 | 0.504226 | 0.479464 | Slc18a2/Th  |
| GO_BP_m1GO:001924citrulline bi2/2606 | 4/23843   | 0.061645 | 0.504226 | 0.479464 | Atp2b4/Ot   |
| GO_BP_m1GO:001965glucose cat2/2606   | 4/23843   | 0.061645 | 0.504226 | 0.479464 | Ldha/Tigar  |
| GO_BP_m1GO:001966glycolytic fr2/2606 | 4/23843   | 0.061645 | 0.504226 | 0.479464 | Ldha/Tigar  |
| GO_BP_m1GO:001966glucose cat2/2606   | 4/23843   | 0.061645 | 0.504226 | 0.479464 | Ldha/Tigar  |
| GO_BP_m1GO:001966nitrogenou2/2606    | 4/23843   | 0.061645 | 0.504226 | 0.479464 | Ldha/Tigar  |
| GO_BP_m1GO:003088negative re2/2606   | 4/23843   | 0.061645 | 0.504226 | 0.479464 | Il10/Tspan  |

|                   |                      |         |          |          |          |             |
|-------------------|----------------------|---------|----------|----------|----------|-------------|
| GO_BP_m1GO:003232 | molybdopt 2/2606     | 4/23843 | 0.061645 | 0.504226 | 0.479464 | Gphn/Moc    |
| GO_BP_m1GO:003237 | positive reç 2/2606  | 4/23843 | 0.061645 | 0.504226 | 0.479464 | Anxa2/Ldlr  |
| GO_BP_m1GO:003238 | positive reç 2/2606  | 4/23843 | 0.061645 | 0.504226 | 0.479464 | Anxa2/Ldlr  |
| GO_BP_m1GO:003239 | positive reç 2/2606  | 4/23843 | 0.061645 | 0.504226 | 0.479464 | Anxa2/Ldlr  |
| GO_BP_m1GO:003282 | regulation 2/2606    | 4/23843 | 0.061645 | 0.504226 | 0.479464 | lfng/Il2rg  |
| GO_BP_m1GO:003335 | S-adenosy 2/2606     | 4/23843 | 0.061645 | 0.504226 | 0.479464 | Ahcyl2/Mtr  |
| GO_BP_m1GO:003419 | acylglycerc 2/2606   | 4/23843 | 0.061645 | 0.504226 | 0.479464 | Cd36/Mttp   |
| GO_BP_m1GO:003419 | triglyceride 2/2606  | 4/23843 | 0.061645 | 0.504226 | 0.479464 | Cd36/Mttp   |
| GO_BP_m1GO:003455 | respiratory 2/2606   | 4/23843 | 0.061645 | 0.504226 | 0.479464 | Sdhaf3/Sdl  |
| GO_BP_m1GO:003455 | mitochond 2/2606     | 4/23843 | 0.061645 | 0.504226 | 0.479464 | Sdhaf3/Sdl  |
| GO_BP_m1GO:003535 | negative re 2/2606   | 4/23843 | 0.061645 | 0.504226 | 0.479464 | Asxl1/Plin5 |
| GO_BP_m1GO:003558 | sequesterir 2/2606   | 4/23843 | 0.061645 | 0.504226 | 0.479464 | Dand5/Fbr   |
| GO_BP_m1GO:003953 | negative re 2/2606   | 4/23843 | 0.061645 | 0.504226 | 0.479464 | Dhx58/Tkfc  |
| GO_BP_m1GO:004477 | meiotic cel 2/2606   | 4/23843 | 0.061645 | 0.504226 | 0.479464 | Topaz1/Ttk  |
| GO_BP_m1GO:004533 | farnesyl diç 2/2606  | 4/23843 | 0.061645 | 0.504226 | 0.479464 | Fdft1/Hmg   |
| GO_BP_m1GO:004591 | negative re 2/2606   | 4/23843 | 0.061645 | 0.504226 | 0.479464 | Itgam/Sncç  |
| GO_BP_m1GO:004596 | negative re 2/2606   | 4/23843 | 0.061645 | 0.504226 | 0.479464 | Itgam/Sncç  |
| GO_BP_m1GO:004612 | deoxyribor 2/2606    | 4/23843 | 0.061645 | 0.504226 | 0.479464 | Dera/Dpyd   |
| GO_BP_m1GO:004629 | formaldehy 2/2606    | 4/23843 | 0.061645 | 0.504226 | 0.479464 | Adh5/Esd    |
| GO_BP_m1GO:004854 | positive reç 2/2606  | 4/23843 | 0.061645 | 0.504226 | 0.479464 | Ankfy1/Ppt  |
| GO_BP_m1GO:005110 | regulation 2/2606    | 4/23843 | 0.061645 | 0.504226 | 0.479464 | Aplf/Xrcc1  |
| GO_BP_m1GO:005110 | positive reç 2/2606  | 4/23843 | 0.061645 | 0.504226 | 0.479464 | Aplf/Xrcc1  |
| GO_BP_m1GO:005138 | response tr 2/2606   | 4/23843 | 0.061645 | 0.504226 | 0.479464 | Htr7/Npasç  |
| GO_BP_m1GO:006006 | oviduct deç 2/2606   | 4/23843 | 0.061645 | 0.504226 | 0.479464 | Cdh1/Wnt1   |
| GO_BP_m1GO:006119 | fungiform j 2/2606   | 4/23843 | 0.061645 | 0.504226 | 0.479464 | Hdac1/Hdaç  |
| GO_BP_m1GO:007031 | positive reç 2/2606  | 4/23843 | 0.061645 | 0.504226 | 0.479464 | Ctgf/Orc1   |
| GO_BP_m1GO:007083 | caveola asç 2/2606   | 4/23843 | 0.061645 | 0.504226 | 0.479464 | Cav1/Cav3   |
| GO_BP_m1GO:007104 | nuclear pol 2/2606   | 4/23843 | 0.061645 | 0.504226 | 0.479464 | Exosc9/Pnç  |
| GO_BP_m1GO:007104 | polyadenyl 2/2606    | 4/23843 | 0.061645 | 0.504226 | 0.479464 | Exosc9/Pnç  |
| GO_BP_m1GO:007164 | regulation 2/2606    | 4/23843 | 0.061645 | 0.504226 | 0.479464 | Mefv/Trpvç  |
| GO_BP_m1GO:007196 | mitotic sist 2/2606  | 4/23843 | 0.061645 | 0.504226 | 0.479464 | Naa10/Naaç  |
| GO_BP_m1GO:007212 | negative re 2/2606   | 4/23843 | 0.061645 | 0.504226 | 0.479464 | lfng/Wt1    |
| GO_BP_m1GO:007213 | kidney meç 2/2606    | 4/23843 | 0.061645 | 0.504226 | 0.479464 | Myc/Osr1    |
| GO_BP_m1GO:007213 | metaneph 2/2606      | 4/23843 | 0.061645 | 0.504226 | 0.479464 | Myc/Osr1    |
| GO_BP_m1GO:007226 | pattern spç 2/2606   | 4/23843 | 0.061645 | 0.504226 | 0.479464 | Irx2/Osr1   |
| GO_BP_m1GO:009019 | negative re 2/2606   | 4/23843 | 0.061645 | 0.504226 | 0.479464 | lfng/Wt1    |
| GO_BP_m1GO:009898 | NMDA selç 2/2606     | 4/23843 | 0.061645 | 0.504226 | 0.479464 | Camk2a/Gi   |
| GO_BP_m1GO:010600 | intestinal h 2/2606  | 4/23843 | 0.061645 | 0.504226 | 0.479464 | Ezr/Pls1    |
| GO_BP_m1GO:011009 | cellular resj 2/2606 | 4/23843 | 0.061645 | 0.504226 | 0.479464 | Adh5/Esd    |
| GO_BP_m1GO:190074 | negative re 2/2606   | 4/23843 | 0.061645 | 0.504226 | 0.479464 | Adgra2/Dc   |
| GO_BP_m1GO:190149 | negative re 2/2606   | 4/23843 | 0.061645 | 0.504226 | 0.479464 | Epha2/Foxç  |
| GO_BP_m1GO:190185 | negative re 2/2606   | 4/23843 | 0.061645 | 0.504226 | 0.479464 | Fln/Lig3    |
| GO_BP_m1GO:190199 | regulation 2/2606    | 4/23843 | 0.061645 | 0.504226 | 0.479464 | Topaz1/Ttk  |
| GO_BP_m1GO:190221 | negative re 2/2606   | 4/23843 | 0.061645 | 0.504226 | 0.479464 | Ptgs2/Ybxç  |
| GO_BP_m1GO:190251 | positive reç 2/2606  | 4/23843 | 0.061645 | 0.504226 | 0.479464 | Endog/Igfb  |
| GO_BP_m1GO:190295 | negative re 2/2606   | 4/23843 | 0.061645 | 0.504226 | 0.479464 | Cfl1/Grin2k |
| GO_BP_m1GO:190327 | positive reç 2/2606  | 4/23843 | 0.061645 | 0.504226 | 0.479464 | Atp1b2/Fxy  |
| GO_BP_m1GO:190393 | cellular resj 2/2606 | 4/23843 | 0.061645 | 0.504226 | 0.479464 | Mapk13/Zc   |

|                                       |           |          |          |          |             |
|---------------------------------------|-----------|----------|----------|----------|-------------|
| GO_BP_m1GO:190422regulation 2/2606    | 4/23843   | 0.061645 | 0.504226 | 0.479464 | Serinc2/Ser |
| GO_BP_m1GO:190439positive reç2/2606   | 4/23843   | 0.061645 | 0.504226 | 0.479464 | Lrp4/Mesd   |
| GO_BP_m1GO:199003calcium ion 2/2606   | 4/23843   | 0.061645 | 0.504226 | 0.479464 | Hrc/Mrln    |
| GO_BP_m1GO:199083response to 2/2606   | 4/23843   | 0.061645 | 0.504226 | 0.479464 | Bcar1/Ednr  |
| GO_BP_m1GO:200120negative re2/2606    | 4/23843   | 0.061645 | 0.504226 | 0.479464 | Cldn18/Fbr  |
| GO_BP_m1GO:001922regulation 13/2606   | 75/23843  | 0.061969 | 0.504226 | 0.479464 | Adm/Adra:   |
| GO_BP_m1GO:003247regulation 13/2606   | 75/23843  | 0.061969 | 0.504226 | 0.479464 | Cactin/Dhx  |
| GO_BP_m1GO:000627DNA replic 7/2606    | 33/23843  | 0.062212 | 0.504226 | 0.479464 | Ccne1/Ccn   |
| GO_BP_m1GO:000689retrograde 7/2606    | 33/23843  | 0.062212 | 0.504226 | 0.479464 | Arf5/Atp9b  |
| GO_BP_m1GO:001054regulation 7/2606    | 33/23843  | 0.062212 | 0.504226 | 0.479464 | Abat/Alox1  |
| GO_BP_m1GO:001943triglyceride 7/2606  | 33/23843  | 0.062212 | 0.504226 | 0.479464 | Dgat1/Gpa   |
| GO_BP_m1GO:009031regulation 7/2606    | 33/23843  | 0.062212 | 0.504226 | 0.479464 | Cdk5/Cib1,  |
| GO_BP_m1GO:005077regulation 28/2606   | 190/23843 | 0.062391 | 0.504226 | 0.479464 | Aatk/Ache/  |
| GO_BP_m1GO:000665glycerophc 30/2606   | 206/23843 | 0.062853 | 0.504226 | 0.479464 | Tmem269/    |
| GO_BP_m1GO:003019extracellula 32/2606 | 222/23843 | 0.063023 | 0.504226 | 0.479464 | 2300002M:   |
| GO_BP_m1GO:000183embryonic 23/2606    | 151/23843 | 0.063197 | 0.504226 | 0.479464 | Abl2/Adm/   |
| GO_BP_m1GO:005189positive reç15/2606  | 90/23843  | 0.063305 | 0.504226 | 0.479464 | Adam8/C1    |
| GO_BP_m1GO:190350liposacchar 15/2606  | 90/23843  | 0.063305 | 0.504226 | 0.479464 | Abo/Aoah/   |
| GO_BP_m1GO:003031osteoclast 17/2606   | 105/23843 | 0.063336 | 0.504226 | 0.479464 | Adam8/An    |
| GO_BP_m1GO:000663fatty acid b 12/2606 | 68/23843  | 0.063488 | 0.504226 | 0.479464 | Abcd3/Aca   |
| GO_BP_m1GO:000763visual beha 12/2606  | 68/23843  | 0.063488 | 0.504226 | 0.479464 | Abl2/Adar   |
| GO_BP_m1GO:003248Rab proteir 12/2606  | 68/23843  | 0.063488 | 0.504226 | 0.479464 | Aatk/Denn   |
| GO_BP_m1GO:004230regulation 12/2606   | 68/23843  | 0.063488 | 0.504226 | 0.479464 | Cdk1/Cdkn   |
| GO_BP_m1GO:009732response to 12/2606  | 68/23843  | 0.063488 | 0.504226 | 0.479464 | Blm/Cdh1/   |
| GO_BP_m1GO:190121regulation 47/2606   | 344/23843 | 0.063954 | 0.504226 | 0.479464 | Adam8/Aif   |
| GO_BP_m1GO:003596response to 20/2606  | 128/23843 | 0.063979 | 0.504226 | 0.479464 | Atf3/Bok/C  |
| GO_BP_m1GO:001082regulation 8/2606    | 40/23843  | 0.06464  | 0.504226 | 0.479464 | Chmp1b/K    |
| GO_BP_m1GO:001088regulation 8/2606    | 40/23843  | 0.06464  | 0.504226 | 0.479464 | Cd36/Fitm:  |
| GO_BP_m1GO:003273positive reç8/2606   | 40/23843  | 0.06464  | 0.504226 | 0.479464 | 5730559C1   |
| GO_BP_m1GO:003806p38MAPK 8/2606       | 40/23843  | 0.06464  | 0.504226 | 0.479464 | Cav3/Ezr/H  |
| GO_BP_m1GO:004645icosanoid 8/2606     | 40/23843  | 0.06464  | 0.504226 | 0.479464 | Alox12/Alo  |
| GO_BP_m1GO:000758excretion 10/2606    | 54/23843  | 0.065463 | 0.504226 | 0.479464 | Adora1/Ad   |
| GO_BP_m1GO:009858cellular res 9/2606  | 47/23843  | 0.065552 | 0.504226 | 0.479464 | Ddx60/Dhx   |
| GO_BP_m1GO:190459positive reç9/2606   | 47/23843  | 0.065552 | 0.504226 | 0.479464 | Cdk1/Hyal:  |
| GO_BP_m1GO:000920purine ribo 35/2606  | 247/23843 | 0.065829 | 0.504226 | 0.479464 | Atp5a1/Atq  |
| GO_BP_m1GO:000999response to 52/2606  | 386/23843 | 0.065937 | 0.504226 | 0.479464 | Aoc1/Arsb,  |
| GO_BP_m1GO:000176establishm 3/2606    | 9/23843   | 0.066155 | 0.504226 | 0.479464 | Dock8/Flot  |
| GO_BP_m1GO:000176establishm 3/2606    | 9/23843   | 0.066155 | 0.504226 | 0.479464 | Dock8/Flot  |
| GO_BP_m1GO:000721serotonin r 3/2606   | 9/23843   | 0.066155 | 0.504226 | 0.479464 | Htr1a/Htr5  |
| GO_BP_m1GO:000911purine nuc 3/2606    | 9/23843   | 0.066155 | 0.504226 | 0.479464 | Aprt/Mthfc  |
| GO_BP_m1GO:001633calcium-in 3/2606    | 9/23843   | 0.066155 | 0.504226 | 0.479464 | Cadm1/Clc   |
| GO_BP_m1GO:003022neutrophil 3/2606    | 9/23843   | 0.066155 | 0.504226 | 0.479464 | Csf3/Fasn/  |
| GO_BP_m1GO:003409regulation 3/2606    | 9/23843   | 0.066155 | 0.504226 | 0.479464 | H2afy/Naa   |
| GO_BP_m1GO:003439telomere 3/2606      | 9/23843   | 0.066155 | 0.504226 | 0.479464 | Terb1/Lem   |
| GO_BP_m1GO:004358tongue mo 3/2606     | 9/23843   | 0.066155 | 0.504226 | 0.479464 | Hdac1/Hda   |
| GO_BP_m1GO:004611nucleobase 3/2606    | 9/23843   | 0.066155 | 0.504226 | 0.479464 | Dpyd/Dpys   |
| GO_BP_m1GO:004651sphingosin 3/2606    | 9/23843   | 0.066155 | 0.504226 | 0.479464 | Acer3/Asah  |
| GO_BP_m1GO:004824epinephrin 3/2606    | 9/23843   | 0.066155 | 0.504226 | 0.479464 | Cartpt/Ly6: |

|                                       |           |          |          |          |              |
|---------------------------------------|-----------|----------|----------|----------|--------------|
| GO_BP_m1GO:005093regulation 3/2606    | 9/23843   | 0.066155 | 0.504226 | 0.479464 | Adamts9/B    |
| GO_BP_m1GO:005102chiasma as 3/2606    | 9/23843   | 0.066155 | 0.504226 | 0.479464 | Msh4/Sycp    |
| GO_BP_m1GO:005125spindle mic 3/2606   | 9/23843   | 0.066155 | 0.504226 | 0.479464 | Kif23/Kif4/I |
| GO_BP_m1GO:00514Cresponse tr 3/2606   | 9/23843   | 0.066155 | 0.504226 | 0.479464 | Adh5/Gclm    |
| GO_BP_m1GO:00604Cpositive re 3/2606   | 9/23843   | 0.066155 | 0.504226 | 0.479464 | Ednrb/P2ry   |
| GO_BP_m1GO:007201glomerular 3/2606    | 9/23843   | 0.066155 | 0.504226 | 0.479464 | Jag1/Lamb    |
| GO_BP_m1GO:007231glomerular 3/2606    | 9/23843   | 0.066155 | 0.504226 | 0.479464 | Jag1/Lamb    |
| GO_BP_m1GO:007267multinucle 3/2606    | 9/23843   | 0.066155 | 0.504226 | 0.479464 | Adam8/Os     |
| GO_BP_m1GO:009052sphingolipi 3/2606   | 9/23843   | 0.066155 | 0.504226 | 0.479464 | Ezr/Spns2/   |
| GO_BP_m1GO:00971Cpostsynapt 3/2606    | 9/23843   | 0.066155 | 0.504226 | 0.479464 | Cdh2/Lrp4,   |
| GO_BP_m1GO:009866G-protein r 3/2606   | 9/23843   | 0.066155 | 0.504226 | 0.479464 | Htr1a/Htr5   |
| GO_BP_m1GO:190016negative re 3/2606   | 9/23843   | 0.066155 | 0.504226 | 0.479464 | C1qtnf3/Pt   |
| GO_BP_m1GO:190301negative re 3/2606   | 9/23843   | 0.066155 | 0.504226 | 0.479464 | Cldn18/Rfl   |
| GO_BP_m1GO:200064regulation 3/2606    | 9/23843   | 0.066155 | 0.504226 | 0.479464 | Anxa2/Pcsk   |
| GO_BP_m1GO:004583positive re 22/2606  | 144/23843 | 0.066235 | 0.504226 | 0.479464 | Angptl3/Av   |
| GO_BP_m1GO:003313regulation 23/2606   | 152/23843 | 0.067087 | 0.504226 | 0.479464 | Atp2b4/Bc    |
| GO_BP_m1GO:000692cellular cor 6/2606  | 27/23843  | 0.067297 | 0.504226 | 0.479464 | Aifm1/Bok    |
| GO_BP_m1GO:003081negative re 6/2606   | 27/23843  | 0.067297 | 0.504226 | 0.479464 | Adra1d/Ak    |
| GO_BP_m1GO:003533peptidyl-ty 6/2606   | 27/23843  | 0.067297 | 0.504226 | 0.479464 | Dusp3/Dus    |
| GO_BP_m1GO:005112RNA polyn 6/2606     | 27/23843  | 0.067297 | 0.504226 | 0.479464 | Cand1/Gtf2   |
| GO_BP_m1GO:007026necroptotic 6/2606   | 27/23843  | 0.067297 | 0.504226 | 0.479464 | Bok/Casp8    |
| GO_BP_m1GO:009031positive re 6/2606   | 27/23843  | 0.067297 | 0.504226 | 0.479464 | Cdk5/Cib1,   |
| GO_BP_m1GO:005138response tr 13/2606  | 76/23843  | 0.067607 | 0.504226 | 0.479464 | Alpl/Bche/(  |
| GO_BP_m1GO:00066Cprotein im 24/2606   | 160/23843 | 0.067783 | 0.504226 | 0.479464 | 1700123L1    |
| GO_BP_m1GO:007083divalent m 59/2606   | 445/23843 | 0.06804  | 0.504226 | 0.479464 | Adcyap1r1.   |
| GO_BP_m1GO:000184neural tub 20/2606   | 129/23843 | 0.068274 | 0.504226 | 0.479464 | Abl2/Adm/    |
| GO_BP_m1GO:000912purine nuc 35/2606   | 248/23843 | 0.06891  | 0.504226 | 0.479464 | Adss/Atp5a   |
| GO_BP_m1GO:001936pyridine nu 21/2606  | 137/23843 | 0.069421 | 0.504226 | 0.479464 | Bpgm/Eno     |
| GO_BP_m1GO:190595regulation 21/2606   | 137/23843 | 0.069421 | 0.504226 | 0.479464 | Abca12/An    |
| GO_BP_m1GO:001081positive re 18/2606  | 114/23843 | 0.069933 | 0.504226 | 0.479464 | Calr/Ccl28/  |
| GO_BP_m1GO:004886stem cell d 14/2606  | 84/23843  | 0.071051 | 0.504226 | 0.479464 | Cfl1/Ednrb.  |
| GO_BP_m1GO:007189DNA biosyn 23/2606   | 153/23843 | 0.071139 | 0.504226 | 0.479464 | Ankrd1/Atr   |
| GO_BP_m1GO:004542regulation 11/2606   | 62/23843  | 0.071239 | 0.504226 | 0.479464 | Atp2b4/Ca    |
| GO_BP_m1GO:009027negative re 11/2606  | 62/23843  | 0.071239 | 0.504226 | 0.479464 | Cartpt/Crhl  |
| GO_BP_m1GO:190126carbohydr 11/2606    | 62/23843  | 0.071239 | 0.504226 | 0.479464 | Abcb1a/Ac    |
| GO_BP_m1GO:002184cell prolifer 7/2606 | 34/23843  | 0.071269 | 0.504226 | 0.479464 | Arx/Dct/Dc   |
| GO_BP_m1GO:003111regulation 7/2606    | 34/23843  | 0.071269 | 0.504226 | 0.479464 | Cib1/Fgf13   |
| GO_BP_m1GO:003323regulation 7/2606    | 34/23843  | 0.071269 | 0.504226 | 0.479464 | Abat/Atp2b   |
| GO_BP_m1GO:199008response tr 7/2606   | 34/23843  | 0.071269 | 0.504226 | 0.479464 | Cib1/E2f1/I  |
| GO_BP_m1GO:199009cellular res 7/2606  | 34/23843  | 0.071269 | 0.504226 | 0.479464 | Cib1/E2f1/I  |
| GO_BP_m1GO:000046maturation 5/2606    | 21/23843  | 0.071421 | 0.504226 | 0.479464 | Eri1/Exosc   |
| GO_BP_m1GO:000178neutrophil 5/2606    | 21/23843  | 0.071421 | 0.504226 | 0.479464 | Hcar2/Ifn    |
| GO_BP_m1GO:001655mRNA mor 5/2606      | 21/23843  | 0.071421 | 0.504226 | 0.479464 | Virma/Apo    |
| GO_BP_m1GO:003204mitochond 5/2606     | 21/23843  | 0.071421 | 0.504226 | 0.479464 | Fln/Lig3/F   |
| GO_BP_m1GO:003438low-densit 5/2606    | 21/23843  | 0.071421 | 0.504226 | 0.479464 | Anxa2/Cd3    |
| GO_BP_m1GO:003952cytoplasmic 5/2606   | 21/23843  | 0.071421 | 0.504226 | 0.479464 | Ddx60/Dhx    |
| GO_BP_m1GO:004205regulation 5/2606    | 21/23843  | 0.071421 | 0.504226 | 0.479464 | Abat/Htr1a   |
| GO_BP_m1GO:004664positive re 5/2606   | 21/23843  | 0.071421 | 0.504226 | 0.479464 | Blm/Cd80/    |

|                   |                     |           |          |          |          |             |
|-------------------|---------------------|-----------|----------|----------|----------|-------------|
| GO_BP_m1GO:007073 | histone H3 5/2606   | 21/23843  | 0.071421 | 0.504226 | 0.479464 | Ezh1/H2afy  |
| GO_BP_m1GO:007211 | cell prolifer5/2606 | 21/23843  | 0.071421 | 0.504226 | 0.479464 | Flcn/Ifng/M |
| GO_BP_m1GO:190012 | regulation 5/2606   | 21/23843  | 0.071421 | 0.504226 | 0.479464 | Anxa2/Grei  |
| GO_BP_m1GO:000628 | nucleotide 10/2606  | 55/23843  | 0.072529 | 0.504226 | 0.479464 | Cul4a/Dclr  |
| GO_BP_m1GO:000021 | meiotic spi 4/2606  | 15/23843  | 0.072741 | 0.504226 | 0.479464 | Washc5/Fb   |
| GO_BP_m1GO:000286 | negative re4/2606   | 15/23843  | 0.072741 | 0.504226 | 0.479464 | Gpx1/Gpx2   |
| GO_BP_m1GO:000737 | segment s4/2606     | 15/23843  | 0.072741 | 0.504226 | 0.479464 | Irx2/Meox2  |
| GO_BP_m1GO:000908 | branched-i4/2606    | 15/23843  | 0.072741 | 0.504226 | 0.479464 | Bcat2/Bckd  |
| GO_BP_m1GO:001569 | quaternary 4/2606   | 15/23843  | 0.072741 | 0.504226 | 0.479464 | Slc22a1/Slc |
| GO_BP_m1GO:003073 | sequesterir4/2606   | 15/23843  | 0.072741 | 0.504226 | 0.479464 | Fitm1/Osbl  |
| GO_BP_m1GO:003165 | regulation 4/2606   | 15/23843  | 0.072741 | 0.504226 | 0.479464 | Abat/Ednrk  |
| GO_BP_m1GO:003222 | regulation 4/2606   | 15/23843  | 0.072741 | 0.504226 | 0.479464 | Htr6/Ifng/T |
| GO_BP_m1GO:003253 | regulation 4/2606   | 15/23843  | 0.072741 | 0.504226 | 0.479464 | Atp8b1/Ezr  |
| GO_BP_m1GO:003268 | negative re4/2606   | 15/23843  | 0.072741 | 0.504226 | 0.479464 | Cactin/Nm   |
| GO_BP_m1GO:003644 | neuronal st4/2606   | 15/23843  | 0.072741 | 0.504226 | 0.479464 | Dct/Dock7,  |
| GO_BP_m1GO:004398 | histone H4 4/2606   | 15/23843  | 0.072741 | 0.504226 | 0.479464 | Kansl1/Kan  |
| GO_BP_m1GO:004398 | histone H4 4/2606   | 15/23843  | 0.072741 | 0.504226 | 0.479464 | Kansl1/Kan  |
| GO_BP_m1GO:004479 | positive re4/2606   | 15/23843  | 0.072741 | 0.504226 | 0.479464 | Cfl1/Nucks  |
| GO_BP_m1GO:004654 | saliva secre4/2606  | 15/23843  | 0.072741 | 0.504226 | 0.479464 | Chrm1/Chr   |
| GO_BP_m1GO:004830 | organelle i4/2606   | 15/23843  | 0.072741 | 0.504226 | 0.479464 | Cdk1/Gbf1   |
| GO_BP_m1GO:005104 | positive re4/2606   | 15/23843  | 0.072741 | 0.504226 | 0.479464 | Adam8/Ifn   |
| GO_BP_m1GO:005505 | neuroblast 4/2606   | 15/23843  | 0.072741 | 0.504226 | 0.479464 | Dct/Dock7,  |
| GO_BP_m1GO:007252 | pyrimidine 4/2606   | 15/23843  | 0.072741 | 0.504226 | 0.479464 | Dpyd/Dpys   |
| GO_BP_m1GO:190172 | regulation 4/2606   | 15/23843  | 0.072741 | 0.504226 | 0.479464 | Flcn/Ifng/M |
| GO_BP_m1GO:190396 | negative re4/2606   | 15/23843  | 0.072741 | 0.504226 | 0.479464 | Arl6ip5/Os  |
| GO_BP_m1GO:009747 | synaptic ve20/2606  | 130/23843 | 0.072762 | 0.504226 | 0.479464 | Bloc1s5/Cc  |
| GO_BP_m1GO:000628 | base-excisi8/2606   | 41/23843  | 0.072959 | 0.504226 | 0.479464 | Lig3/Mpg/l  |
| GO_BP_m1GO:000650 | membrane 8/2606     | 41/23843  | 0.072959 | 0.504226 | 0.479464 | Adam8/Ap    |
| GO_BP_m1GO:004678 | regulation 8/2606   | 41/23843  | 0.072959 | 0.504226 | 0.479464 | Ccl4/Hdac3  |
| GO_BP_m1GO:007147 | cellular res8/2606  | 41/23843  | 0.072959 | 0.504226 | 0.479464 | Mir7b/Mir9  |
| GO_BP_m1GO:000257 | myeloid let30/2606  | 209/23843 | 0.073042 | 0.504226 | 0.479464 | Adam8/An    |
| GO_BP_m1GO:005122 | spindle ass17/2606  | 107/23843 | 0.073075 | 0.504226 | 0.479464 | Cdc20/Chn   |
| GO_BP_m1GO:004340 | regulation 40/2606  | 290/23843 | 0.073105 | 0.504226 | 0.479464 | 5730559C1   |
| GO_BP_m1GO:000276 | negative re9/2606   | 48/23843  | 0.073209 | 0.504226 | 0.479464 | Cartpt/Cldr |
| GO_BP_m1GO:000712 | synapsis 9/2606     | 48/23843  | 0.073209 | 0.504226 | 0.479464 | Terb1/Ccne  |
| GO_BP_m1GO:003127 | regulation 9/2606   | 48/23843  | 0.073209 | 0.504226 | 0.479464 | Adra1d/Ak   |
| GO_BP_m1GO:004512 | regulation 9/2606   | 48/23843  | 0.073209 | 0.504226 | 0.479464 | Adam8/Cal   |
| GO_BP_m1GO:004866 | negative re9/2606   | 48/23843  | 0.073209 | 0.504226 | 0.479464 | Cav1/Ifng/l |
| GO_BP_m1GO:006100 | cell differer9/2606 | 48/23843  | 0.073209 | 0.504226 | 0.479464 | Basp1/Gdn   |
| GO_BP_m1GO:001003 | response tr58/2606  | 439/23843 | 0.073586 | 0.504226 | 0.479464 | Abat/Aoc1.  |
| GO_BP_m1GO:004688 | negative re15/2606  | 92/23843  | 0.073925 | 0.504226 | 0.479464 | Adora1/Ca   |
| GO_BP_m1GO:000609 | glycolytic p12/2606 | 70/23843  | 0.075978 | 0.504226 | 0.479464 | Bpgm/Eno3   |
| GO_BP_m1GO:200024 | positive re12/2606  | 70/23843  | 0.075978 | 0.504226 | 0.479464 | Cib1/Dmrt:  |
| GO_BP_m1GO:009719 | intrinsic ap40/2606 | 291/23843 | 0.076166 | 0.504226 | 0.479464 | Aifm1/Arl6  |
| GO_BP_m1GO:002240 | negative re25/2606  | 170/23843 | 0.076275 | 0.504226 | 0.479464 | Abat/Abl2/  |
| GO_BP_m1GO:003209 | positive re16/2606  | 100/23843 | 0.076317 | 0.504226 | 0.479464 | Abl2/Anxa2  |
| GO_BP_m1GO:009772 | sperm mot16/2606    | 100/23843 | 0.076317 | 0.504226 | 0.479464 | Atp2b4/Bb   |
| GO_BP_m1GO:000189 | tissue hom31/2606   | 218/23843 | 0.076525 | 0.504226 | 0.479464 | 5730559C1   |



|                                      |           |          |          |          |              |
|--------------------------------------|-----------|----------|----------|----------|--------------|
| GO_BP_m1GO:000991hormone tr48/2606   | 357/23843 | 0.076561 | 0.504226 | 0.479464 | Abat/Abcb    |
| GO_BP_m1GO:000718adenylate c27/2606  | 186/23843 | 0.076711 | 0.504226 | 0.479464 | Adcy4/Adc    |
| GO_BP_m1GO:004244hormone n29/2606    | 202/23843 | 0.076768 | 0.504226 | 0.479464 | Ache/Adh1    |
| GO_BP_m1GO:006004heart contr29/2606  | 202/23843 | 0.076768 | 0.504226 | 0.479464 | Adm/Ador     |
| GO_BP_m1GO:005109positive re28/2606  | 194/23843 | 0.076782 | 0.504226 | 0.479464 | Abl2/Anxa2   |
| GO_BP_m1GO:004247odontogen14/2606    | 85/23843  | 0.076899 | 0.504226 | 0.479464 | Ambn/Foxc    |
| GO_BP_m1GO:000763feeding be20/2606   | 131/23843 | 0.077445 | 0.504226 | 0.479464 | Aoc3/Cartp   |
| GO_BP_m1GO:190156fatty acid d20/2606 | 131/23843 | 0.077445 | 0.504226 | 0.479464 | Akr1c12/Al   |
| GO_BP_m1GO:000606alcohol me37/2606   | 267/23843 | 0.077803 | 0.504226 | 0.479464 | Acer3/Adc    |
| GO_BP_m1GO:000073DNA synth6/2606     | 28/23843  | 0.078073 | 0.504226 | 0.479464 | Pcna/Pole/   |
| GO_BP_m1GO:000692substrate-c6/2606   | 28/23843  | 0.078073 | 0.504226 | 0.479464 | Abl2/Adar    |
| GO_BP_m1GO:002151spinal cord6/2606   | 28/23843  | 0.078073 | 0.504226 | 0.479464 | Dbx1/Dll4/   |
| GO_BP_m1GO:003129replication6/2606   | 28/23843  | 0.078073 | 0.504226 | 0.479464 | Blm/Fbxo1.   |
| GO_BP_m1GO:004567negative re6/2606   | 28/23843  | 0.078073 | 0.504226 | 0.479464 | Cartpt/Cldr  |
| GO_BP_m1GO:006121regulation6/2606    | 28/23843  | 0.078073 | 0.504226 | 0.479464 | Gdnf/Lgr4/   |
| GO_BP_m1GO:004227purine nuc11/2606   | 63/23843  | 0.078183 | 0.504226 | 0.479464 | Acpp/Adk/    |
| GO_BP_m1GO:001046regulation17/2606   | 108/23843 | 0.078298 | 0.504226 | 0.479464 | Adora1/Ca    |
| GO_BP_m1GO:007200nephron e17/2606    | 108/23843 | 0.078298 | 0.504226 | 0.479464 | Basp1/Fgf1   |
| GO_BP_m1GO:000919ribonucleo:35/2606  | 251/23843 | 0.078759 | 0.504226 | 0.479464 | Atp5a1/Atp   |
| GO_BP_m1GO:002154pallium dev22/2606  | 147/23843 | 0.079156 | 0.504226 | 0.479464 | Arx/Bbs2/E   |
| GO_BP_m1GO:003260type I inter13/2606 | 78/23843  | 0.079866 | 0.504226 | 0.479464 | Cactin/Dhx   |
| GO_BP_m1GO:004603ADP metak13/2606    | 78/23843  | 0.079866 | 0.504226 | 0.479464 | Bpgm/Eno:    |
| GO_BP_m1GO:007022regulation13/2606   | 78/23843  | 0.079866 | 0.504226 | 0.479464 | Adam8/Bln    |
| GO_BP_m1GO:200105reactive nit13/2606 | 78/23843  | 0.079866 | 0.504226 | 0.479464 | Atp2b4/Ca    |
| GO_BP_m1GO:001491positive re10/2606  | 56/23843  | 0.080054 | 0.504226 | 0.479464 | Dock4/Doc    |
| GO_BP_m1GO:190054regulation24/2606   | 163/23843 | 0.080171 | 0.504226 | 0.479464 | Adm/Adra:    |
| GO_BP_m1GO:003025lipid modif29/2606  | 203/23843 | 0.08061  | 0.504226 | 0.479464 | Abcd3/Abc    |
| GO_BP_m1GO:005087positive re26/2606  | 179/23843 | 0.080648 | 0.504226 | 0.479464 | Adam8/Ad     |
| GO_BP_m1GO:000600glucose me27/2606   | 187/23843 | 0.080724 | 0.504226 | 0.479464 | Atf3/Bpgm    |
| GO_BP_m1GO:000009sulfur amin7/2606   | 35/23843  | 0.081066 | 0.504226 | 0.479464 | Ahcyl2/Api   |
| GO_BP_m1GO:000761long-term7/2606     | 35/23843  | 0.081066 | 0.504226 | 0.479464 | Cpeb3/Gria   |
| GO_BP_m1GO:200040positive re7/2606   | 35/23843  | 0.081066 | 0.504226 | 0.479464 | Adam8/Ccl    |
| GO_BP_m1GO:000602aminoglyc9/2606     | 49/23843  | 0.081394 | 0.504226 | 0.479464 | B3gnt3/B3g   |
| GO_BP_m1GO:001657histone ph9/2606    | 49/23843  | 0.081394 | 0.504226 | 0.479464 | Cdk1/Cdk2    |
| GO_BP_m1GO:001714stem cell d9/2606   | 49/23843  | 0.081394 | 0.504226 | 0.479464 | Dct/Dock7,   |
| GO_BP_m1GO:004614pigment bi9/2606    | 49/23843  | 0.081394 | 0.504226 | 0.479464 | Aprt/Cox15   |
| GO_BP_m1GO:003238regulation55/2606   | 417/23843 | 0.081463 | 0.504226 | 0.479464 | Anxa2/Arih   |
| GO_BP_m1GO:000095mitochond8/2606     | 42/23843  | 0.081896 | 0.504226 | 0.479464 | Fastkd1/Gr   |
| GO_BP_m1GO:003304negative re8/2606   | 42/23843  | 0.081896 | 0.504226 | 0.479464 | Klhl22/Mac   |
| GO_BP_m1GO:004207intraciliary8/2606  | 42/23843  | 0.081896 | 0.504226 | 0.479464 | Ift22/Ift27/ |
| GO_BP_m1GO:004241dopamine8/2606      | 42/23843  | 0.081896 | 0.504226 | 0.479464 | Abat/Gch1.   |
| GO_BP_m1GO:005189negative re8/2606   | 42/23843  | 0.081896 | 0.504226 | 0.479464 | Cib1/Drd3/   |
| GO_BP_m1GO:009772calcineurin8/2606   | 42/23843  | 0.081896 | 0.504226 | 0.479464 | Akap6/Atp    |
| GO_BP_m1GO:190138regulation8/2606    | 42/23843  | 0.081896 | 0.504226 | 0.479464 | Adra1d/Ca    |
| GO_BP_m1GO:003596cellular res16/2606 | 101/23843 | 0.081911 | 0.504226 | 0.479464 | Atf3/Bok/C   |
| GO_BP_m1GO:000761memory20/2606       | 132/23843 | 0.082324 | 0.504226 | 0.479464 | Cpeb3/Fen    |
| GO_BP_m1GO:007188leukocyte20/2606    | 132/23843 | 0.082324 | 0.504226 | 0.479464 | Adam8/Bln    |
| GO_BP_m1GO:004592positive re40/2606  | 293/23843 | 0.082554 | 0.504226 | 0.479464 | Adnp2/Aka    |

|                               |         |           |          |          |          |              |
|-------------------------------|---------|-----------|----------|----------|----------|--------------|
| GO_BP_m1GO:005086regulation   | 40/2606 | 293/23843 | 0.082554 | 0.504226 | 0.479464 | Adam8/Ad     |
| GO_BP_m1GO:000675ATP generat  | 12/2606 | 71/23843  | 0.082771 | 0.504226 | 0.479464 | Bpgm/Eno1    |
| GO_BP_m1GO:000995dorsal/vent  | 17/2606 | 109/23843 | 0.083761 | 0.504226 | 0.479464 | Dbx1/Dll4/   |
| GO_BP_m1GO:004407regulation   | 17/2606 | 109/23843 | 0.083761 | 0.504226 | 0.479464 | Abat/Abcb    |
| GO_BP_m1GO:190533regulation   | 17/2606 | 109/23843 | 0.083761 | 0.504226 | 0.479464 | Abl2/Cav3/   |
| GO_BP_m1GO:005130regulation   | 22/2606 | 148/23843 | 0.083814 | 0.504226 | 0.479464 | Ahctf1/Ank   |
| GO_BP_m1GO:001810peptidyl-ty  | 42/2606 | 310/23843 | 0.084307 | 0.504226 | 0.479464 | Aatk/Abi1/   |
| GO_BP_m1GO:004886stem cell d  | 30/2606 | 212/23843 | 0.084325 | 0.504226 | 0.479464 | Bche/Cfl1/l  |
| GO_BP_m1GO:000683serotonin t  | 5/2606  | 22/23843  | 0.084463 | 0.504226 | 0.479464 | Hrh3/Htr1a   |
| GO_BP_m1GO:000726nitric oxide | 5/2606  | 22/23843  | 0.084463 | 0.504226 | 0.479464 | Atp2b4/Cd    |
| GO_BP_m1GO:001820peptidyl-gl  | 5/2606  | 22/23843  | 0.084463 | 0.504226 | 0.479464 | Naa10/Naaf   |
| GO_BP_m1GO:003289negative re  | 5/2606  | 22/23843  | 0.084463 | 0.504226 | 0.479464 | Ccl4/Hdac1   |
| GO_BP_m1GO:003412positive re  | 5/2606  | 22/23843  | 0.084463 | 0.504226 | 0.479464 | Cav1/Ptpn12  |
| GO_BP_m1GO:004206regulation   | 5/2606  | 22/23843  | 0.084463 | 0.504226 | 0.479464 | Abat/Htr1a   |
| GO_BP_m1GO:005068negative re  | 5/2606  | 22/23843  | 0.084463 | 0.504226 | 0.479464 | Dhx58/Npl    |
| GO_BP_m1GO:005085negative re  | 5/2606  | 22/23843  | 0.084463 | 0.504226 | 0.479464 | Btnl2/Dusp   |
| GO_BP_m1GO:007145cellular res | 5/2606  | 22/23843  | 0.084463 | 0.504226 | 0.479464 | Cd36/Fbln5   |
| GO_BP_m1GO:007145cellular res | 5/2606  | 22/23843  | 0.084463 | 0.504226 | 0.479464 | Cd36/Fbln5   |
| GO_BP_m1GO:007187cellular res | 5/2606  | 22/23843  | 0.084463 | 0.504226 | 0.479464 | Akap6/Atp    |
| GO_BP_m1GO:007135cellular res | 25/2606 | 172/23843 | 0.084815 | 0.504226 | 0.479464 | Ankrd1/Ca    |
| GO_BP_m1GO:004592negative re  | 36/2606 | 261/23843 | 0.085232 | 0.504226 | 0.479464 | Aatk/Adipc   |
| GO_BP_m1GO:000756embryo im    | 11/2606 | 64/23843  | 0.085536 | 0.504226 | 0.479464 | Arhgdib/At   |
| GO_BP_m1GO:000906glutamine    | 11/2606 | 64/23843  | 0.085536 | 0.504226 | 0.479464 | Dglucy/Ald   |
| GO_BP_m1GO:002176hippocamp    | 11/2606 | 64/23843  | 0.085536 | 0.504226 | 0.479464 | Bbs2/Btg2/   |
| GO_BP_m1GO:003139negative re  | 11/2606 | 64/23843  | 0.085536 | 0.504226 | 0.479464 | Cav1/Svbp.   |
| GO_BP_m1GO:004682positive re  | 11/2606 | 64/23843  | 0.085536 | 0.504226 | 0.479464 | Cdk1/Hyal1   |
| GO_BP_m1GO:199054mitochond    | 11/2606 | 64/23843  | 0.085536 | 0.504226 | 0.479464 | Atp5o/Grp    |
| GO_BP_m1GO:000157microtubul   | 15/2606 | 94/23843  | 0.085652 | 0.504226 | 0.479464 | Bbs2/Cc2d    |
| GO_BP_m1GO:000195regulation   | 15/2606 | 94/23843  | 0.085652 | 0.504226 | 0.479464 | Arg1/Cacti   |
| GO_BP_m1GO:003238positive re  | 35/2606 | 253/23843 | 0.085842 | 0.504226 | 0.479464 | Anxa2/Arih   |
| GO_BP_m1GO:005073regulation   | 34/2606 | 245/23843 | 0.086421 | 0.504226 | 0.479464 | Adora1/Ca    |
| GO_BP_m1GO:004327response tr  | 13/2606 | 79/23843  | 0.086494 | 0.504226 | 0.479464 | Abat/Adra1   |
| GO_BP_m1GO:000001single strar | 3/2606  | 10/23843  | 0.087056 | 0.504226 | 0.479464 | Aplf/Aptx/   |
| GO_BP_m1GO:000653aspartate n  | 3/2606  | 10/23843  | 0.087056 | 0.504226 | 0.479464 | Adss/Ddo/    |
| GO_BP_m1GO:001045negative re  | 3/2606  | 10/23843  | 0.087056 | 0.504226 | 0.479464 | Fkbp1b/Rn    |
| GO_BP_m1GO:001406regulation   | 3/2606  | 10/23843  | 0.087056 | 0.504226 | 0.479464 | Hrh3/Htr1a   |
| GO_BP_m1GO:001583amino-acid   | 3/2606  | 10/23843  | 0.087056 | 0.504226 | 0.479464 | Slc22a5/Slc  |
| GO_BP_m1GO:001585nucleoside   | 3/2606  | 10/23843  | 0.087056 | 0.504226 | 0.479464 | Adora1/Slc   |
| GO_BP_m1GO:001626gap junctio  | 3/2606  | 10/23843  | 0.087056 | 0.504226 | 0.479464 | Cav1/Gjb2/   |
| GO_BP_m1GO:003038fructose 1,6 | 3/2606  | 10/23843  | 0.087056 | 0.504226 | 0.479464 | lfng/Pfkl/Ti |
| GO_BP_m1GO:003162regulation   | 3/2606  | 10/23843  | 0.087056 | 0.504226 | 0.479464 | EdnrB/Ptgs   |
| GO_BP_m1GO:003222positive re  | 3/2606  | 10/23843  | 0.087056 | 0.504226 | 0.479464 | lfng/Tac1/   |
| GO_BP_m1GO:003326regulation   | 3/2606  | 10/23843  | 0.087056 | 0.504226 | 0.479464 | Cdc7/Dach    |
| GO_BP_m1GO:003564endosome     | 3/2606  | 10/23843  | 0.087056 | 0.504226 | 0.479464 | Bloc1s5/Cc   |
| GO_BP_m1GO:003649PERK-med     | 3/2606  | 10/23843  | 0.087056 | 0.504226 | 0.479464 | Bok/Nck2/l   |
| GO_BP_m1GO:004348endosome     | 3/2606  | 10/23843  | 0.087056 | 0.504226 | 0.479464 | Bloc1s5/Cc   |
| GO_BP_m1GO:004392negative re  | 3/2606  | 10/23843  | 0.087056 | 0.504226 | 0.479464 | Ccl4/Hdac1   |
| GO_BP_m1GO:004652sphingoid l  | 3/2606  | 10/23843  | 0.087056 | 0.504226 | 0.479464 | Acer3/Asaf   |

|                                      |           |          |          |          |              |
|--------------------------------------|-----------|----------|----------|----------|--------------|
| GO_BP_m1GO:004875pigment gr3/2606    | 10/23843  | 0.087056 | 0.504226 | 0.479464 | Bloc1s5/Cc   |
| GO_BP_m1GO:005100negative re3/2606   | 10/23843  | 0.087056 | 0.504226 | 0.479464 | Atp2b4/Ca    |
| GO_BP_m1GO:007024negative re3/2606   | 10/23843  | 0.087056 | 0.504226 | 0.479464 | Blm/Jak3/P   |
| GO_BP_m1GO:007067response tr3/2606   | 10/23843  | 0.087056 | 0.504226 | 0.479464 | Cldn1/Ifng,  |
| GO_BP_m1GO:007207loop of He13/2606   | 10/23843  | 0.087056 | 0.504226 | 0.479464 | Irx2/Jag1/F  |
| GO_BP_m1GO:007220cell prolifer3/2606 | 10/23843  | 0.087056 | 0.504226 | 0.479464 | Myc/Osr1/'   |
| GO_BP_m1GO:190001negative re3/2606   | 10/23843  | 0.087056 | 0.504226 | 0.479464 | D1Erttd622t  |
| GO_BP_m1GO:190004regulation 3/2606   | 10/23843  | 0.087056 | 0.504226 | 0.479464 | Abl2/Btnl2,  |
| GO_BP_m1GO:190019regulation 3/2606   | 10/23843  | 0.087056 | 0.504226 | 0.479464 | Npr2/Ppp2    |
| GO_BP_m1GO:190207response tr3/2606   | 10/23843  | 0.087056 | 0.504226 | 0.479464 | Mapk13/Rr    |
| GO_BP_m1GO:190344protein loc 3/2606  | 10/23843  | 0.087056 | 0.504226 | 0.479464 | Bbs2/Tulp1   |
| GO_BP_m1GO:005070negative re20/2606  | 133/23843 | 0.087403 | 0.504226 | 0.479464 | C1qtnf3/Di   |
| GO_BP_m1GO:005105negative re20/2606  | 133/23843 | 0.087403 | 0.504226 | 0.479464 | Ankrd1/Ap    |
| GO_BP_m1GO:004560positive re10/2606  | 57/23843  | 0.088043 | 0.504226 | 0.479464 | Adig/Ccdc3   |
| GO_BP_m1GO:004354positive re30/2606  | 213/23843 | 0.088334 | 0.504226 | 0.479464 | Arhgef7/Bc   |
| GO_BP_m1GO:190547regulation 22/2606  | 149/23843 | 0.088651 | 0.504226 | 0.479464 | Appl1/Carr   |
| GO_BP_m1GO:000301heart procc29/2606  | 205/23843 | 0.088682 | 0.504226 | 0.479464 | Adm/Ador.    |
| GO_BP_m1GO:000627DNA stranc4/2606    | 16/23843  | 0.088925 | 0.504226 | 0.479464 | Fen1/Lig3/   |
| GO_BP_m1GO:000630apoptotic [4/2606   | 16/23843  | 0.088925 | 0.504226 | 0.479464 | Aifm1/Dffa   |
| GO_BP_m1GO:000647N-terminal4/2606    | 16/23843  | 0.088925 | 0.504226 | 0.479464 | Kat2b/Naa    |
| GO_BP_m1GO:000674ubiquinone4/2606    | 16/23843  | 0.088925 | 0.504226 | 0.479464 | Coq10b/Cc    |
| GO_BP_m1GO:001022response tr4/2606   | 16/23843  | 0.088925 | 0.504226 | 0.479464 | Cdkn1a/Hy    |
| GO_BP_m1GO:003210negative re4/2606   | 16/23843  | 0.088925 | 0.504226 | 0.479464 | Bbs2/Cartp   |
| GO_BP_m1GO:003210negative re4/2606   | 16/23843  | 0.088925 | 0.504226 | 0.479464 | Bbs2/Cartp   |
| GO_BP_m1GO:003249response tr4/2606   | 16/23843  | 0.088925 | 0.504226 | 0.479464 | 5730559C1    |
| GO_BP_m1GO:003438lipid particl4/2606 | 16/23843  | 0.088925 | 0.504226 | 0.479464 | Fitm1/Plin5  |
| GO_BP_m1GO:004308penile erec4/2606   | 16/23843  | 0.088925 | 0.504226 | 0.479464 | Avpr1a/Edi   |
| GO_BP_m1GO:004693pore comp4/2606     | 16/23843  | 0.088925 | 0.504226 | 0.479464 | Ahctf1/Cct:  |
| GO_BP_m1GO:004807regulation 4/2606   | 16/23843  | 0.088925 | 0.504226 | 0.479464 | Adamts9/B    |
| GO_BP_m1GO:006064mammary id4/2606    | 16/23843  | 0.088925 | 0.504226 | 0.479464 | Irf6/Lats1/S |
| GO_BP_m1GO:007267lamellipodi4/2606   | 16/23843  | 0.088925 | 0.504226 | 0.479464 | Abi1/Enpp:   |
| GO_BP_m1GO:009750sialylation 4/2606  | 16/23843  | 0.088925 | 0.504226 | 0.479464 | St3gal3/St6  |
| GO_BP_m1GO:190166quinone bi4/2606    | 16/23843  | 0.088925 | 0.504226 | 0.479464 | Coq10b/Cc    |
| GO_BP_m1GO:190188positive re4/2606   | 16/23843  | 0.088925 | 0.504226 | 0.479464 | Cfl1/Htr1a/  |
| GO_BP_m1GO:200124positive re4/2606   | 16/23843  | 0.088925 | 0.504226 | 0.479464 | Jak3/Nf1/P   |
| GO_BP_m1GO:001081regulation 27/2606  | 189/23843 | 0.089171 | 0.504226 | 0.479464 | Bcar1/Bcas   |
| GO_BP_m1GO:190303positive re27/2606  | 189/23843 | 0.089171 | 0.504226 | 0.479464 | Adam8/Ad     |
| GO_BP_m1GO:000645protein folk26/2606 | 181/23843 | 0.089292 | 0.504226 | 0.479464 | Calr/Canx1/  |
| GO_BP_m1GO:001936pyridine nu14/2606  | 87/23843  | 0.089507 | 0.504226 | 0.479464 | Bpgm/Eno:    |
| GO_BP_m1GO:005192regulation 35/2606  | 254/23843 | 0.089541 | 0.504226 | 0.479464 | Adcyap1r1.   |
| GO_BP_m1GO:000047maturation6/2606    | 29/23843  | 0.089761 | 0.504226 | 0.479464 | Ftsj3/Nop2   |
| GO_BP_m1GO:000155oocyte mat6/2606    | 29/23843  | 0.089761 | 0.504226 | 0.479464 | Washc5/Fb    |
| GO_BP_m1GO:003080negative re6/2606   | 29/23843  | 0.089761 | 0.504226 | 0.479464 | Adra1d/Ak    |
| GO_BP_m1GO:003243negative re6/2606   | 29/23843  | 0.089761 | 0.504226 | 0.479464 | N4bp1/Og     |
| GO_BP_m1GO:003411regulation 6/2606   | 29/23843  | 0.089761 | 0.504226 | 0.479464 | Abat/Alox1   |
| GO_BP_m1GO:004311regulation 6/2606   | 29/23843  | 0.089761 | 0.504226 | 0.479464 | Adm/Bcr/C    |
| GO_BP_m1GO:004214retrograde 12/2606  | 72/23843  | 0.089933 | 0.504226 | 0.479464 | Ankfy1/Gb-   |
| GO_BP_m1GO:005170multi-orga 12/2606  | 72/23843  | 0.089933 | 0.504226 | 0.479464 | Abl2/Avpr1   |

|                                |         |           |          |          |          |             |
|--------------------------------|---------|-----------|----------|----------|----------|-------------|
| GO_BP_m1GO:007015chromosom     | 12/2606 | 72/23843  | 0.089933 | 0.504226 | 0.479464 | Terb1/Ccne  |
| GO_BP_m1GO:000028nuclear-tra   | 9/2606  | 50/23843  | 0.090108 | 0.504226 | 0.479464 | Btg2/Noct   |
| GO_BP_m1GO:003362cell adhesi   | 9/2606  | 50/23843  | 0.090108 | 0.504226 | 0.479464 | Cib1/Epha2  |
| GO_BP_m1GO:190161organic hydr  | 9/2606  | 50/23843  | 0.090108 | 0.504226 | 0.479464 | Adh1/Adh5   |
| GO_BP_m1GO:001695antibiotic n  | 18/2606 | 118/23843 | 0.09082  | 0.504226 | 0.479464 | Adh1/Adh5   |
| GO_BP_m1GO:000738pattern spe   | 59/2606 | 454/23843 | 0.090999 | 0.504226 | 0.479464 | Abi1/Alx3/  |
| GO_BP_m1GO:007066regulation    | 32/2606 | 230/23843 | 0.091421 | 0.504226 | 0.479464 | Adk/Arg1/I  |
| GO_BP_m1GO:000196negative re   | 8/2606  | 43/23843  | 0.091449 | 0.504226 | 0.479464 | Arg1/Cacti  |
| GO_BP_m1GO:190311regulation    | 8/2606  | 43/23843  | 0.091449 | 0.504226 | 0.479464 | Acta2/Akap  |
| GO_BP_m1GO:190551macrophage    | 8/2606  | 43/23843  | 0.091449 | 0.504226 | 0.479464 | Cklf/Cxcl17 |
| GO_BP_m1GO:001072negative re   | 48/2606 | 362/23843 | 0.091503 | 0.504226 | 0.479464 | Aatk/Bcar1  |
| GO_BP_m1GO:004001positive re   | 7/2606  | 36/23843  | 0.0916   | 0.504226 | 0.479464 | Foxa2/Gdn   |
| GO_BP_m1GO:004476multi-orga    | 7/2606  | 36/23843  | 0.0916   | 0.504226 | 0.479464 | Ddx60/Dhx   |
| GO_BP_m1GO:004646neutral lipi  | 7/2606  | 36/23843  | 0.0916   | 0.504226 | 0.479464 | Dgat1/Gpa   |
| GO_BP_m1GO:004646acylglycer    | 7/2606  | 36/23843  | 0.0916   | 0.504226 | 0.479464 | Dgat1/Gpa   |
| GO_BP_m1GO:007020protein hor   | 7/2606  | 36/23843  | 0.0916   | 0.504226 | 0.479464 | Arg1/Clybl  |
| GO_BP_m1GO:000270regulation    | 19/2606 | 126/23843 | 0.091877 | 0.504226 | 0.479464 | Aplf/Arg1/  |
| GO_BP_m1GO:004325regulation    | 15/2606 | 95/23843  | 0.091936 | 0.504226 | 0.479464 | Adcyap1r1.  |
| GO_BP_m1GO:003294regulation    | 31/2606 | 222/23843 | 0.091969 | 0.504226 | 0.479464 | Adk/Arg1/I  |
| GO_BP_m1GO:009025regulation    | 31/2606 | 222/23843 | 0.091969 | 0.504226 | 0.479464 | Abat/Adk/   |
| GO_BP_m1GO:000181positive re   | 53/2606 | 404/23843 | 0.092153 | 0.504226 | 0.479464 | 5730559C1   |
| GO_BP_m1GO:007252pyridine-c    | 21/2606 | 142/23843 | 0.093268 | 0.504226 | 0.479464 | Bpgm/Eno:   |
| GO_BP_m1GO:003196response tr   | 13/2606 | 80/23843  | 0.093456 | 0.504226 | 0.479464 | Alpl/Bche/  |
| GO_BP_m1GO:003287positive re   | 22/2606 | 150/23843 | 0.093666 | 0.504226 | 0.479464 | 5730559C1   |
| GO_BP_m1GO:004814regulation    | 16/2606 | 103/23843 | 0.093878 | 0.504226 | 0.479464 | Anxa2/Cdk   |
| GO_BP_m1GO:006075regulation    | 16/2606 | 103/23843 | 0.093878 | 0.504226 | 0.479464 | Arg1/Cacti  |
| GO_BP_m1GO:004533cellular res  | 23/2606 | 158/23843 | 0.093903 | 0.504226 | 0.479464 | Bnip3/Cdk:  |
| GO_BP_m1GO:007217epithelial ti | 23/2606 | 158/23843 | 0.093903 | 0.504226 | 0.479464 | Abl2/Adm/   |
| GO_BP_m1GO:000916purine ribo   | 34/2606 | 247/23843 | 0.094092 | 0.504226 | 0.479464 | Adss/Atp5:  |
| GO_BP_m1GO:001821peptidyl-ty   | 42/2606 | 313/23843 | 0.094414 | 0.504226 | 0.479464 | Aatk/Abi1/  |
| GO_BP_m1GO:000195regulation    | 2/2606  | 5/23843   | 0.095407 | 0.504226 | 0.479464 | Avpr1a/Drc  |
| GO_BP_m1GO:000290positive re   | 2/2606  | 5/23843   | 0.095407 | 0.504226 | 0.479464 | Il10/Myc    |
| GO_BP_m1GO:000600fructose 2,6  | 2/2606  | 5/23843   | 0.095407 | 0.504226 | 0.479464 | Pfkfb1/Tig: |
| GO_BP_m1GO:000600ethanol cat   | 2/2606  | 5/23843   | 0.095407 | 0.504226 | 0.479464 | Adh1/Adh5   |
| GO_BP_m1GO:000611fermentati    | 2/2606  | 5/23843   | 0.095407 | 0.504226 | 0.479464 | Ldha/Tigar  |
| GO_BP_m1GO:000670progester     | 2/2606  | 5/23843   | 0.095407 | 0.504226 | 0.479464 | Dgkq/Ppar   |
| GO_BP_m1GO:000725spermatid     | 2/2606  | 5/23843   | 0.095407 | 0.504226 | 0.479464 | Dmrtc2/lft: |
| GO_BP_m1GO:000745midgut dev    | 2/2606  | 5/23843   | 0.095407 | 0.504226 | 0.479464 | EdnrB/Smc   |
| GO_BP_m1GO:001085negative re   | 2/2606  | 5/23843   | 0.095407 | 0.504226 | 0.479464 | Osbpl8/Pnj  |
| GO_BP_m1GO:001406negative re   | 2/2606  | 5/23843   | 0.095407 | 0.504226 | 0.479464 | Hrh3/Htr7   |
| GO_BP_m1GO:001472regulation    | 2/2606  | 5/23843   | 0.095407 | 0.504226 | 0.479464 | Myh7/Mylk   |
| GO_BP_m1GO:001588folic acid tr | 2/2606  | 5/23843   | 0.095407 | 0.504226 | 0.479464 | Folr2/Slc46 |
| GO_BP_m1GO:001625attachmen     | 2/2606  | 5/23843   | 0.095407 | 0.504226 | 0.479464 | Pigs/Pigu   |
| GO_BP_m1GO:001908transforma    | 2/2606  | 5/23843   | 0.095407 | 0.504226 | 0.479464 | Hyal2/Myc   |
| GO_BP_m1GO:001950L-methioni    | 2/2606  | 5/23843   | 0.095407 | 0.504226 | 0.479464 | Apip/Enop   |
| GO_BP_m1GO:003020dermatan      | 2/2606  | 5/23843   | 0.095407 | 0.504226 | 0.479464 | Dse/Dsel    |
| GO_BP_m1GO:003222negative re   | 2/2606  | 5/23843   | 0.095407 | 0.504226 | 0.479464 | Ptgs2/Snca  |
| GO_BP_m1GO:003223activation    | 2/2606  | 5/23843   | 0.095407 | 0.504226 | 0.479464 | Asph/Stim:  |

|          |           |                                  |        |         |          |          |          |             |
|----------|-----------|----------------------------------|--------|---------|----------|----------|----------|-------------|
| GO_BP_m1 | GO:003280 | low-density lipoprotein receptor | 2/2606 | 5/23843 | 0.095407 | 0.504226 | 0.479464 | Anxa2/Pcsk  |
| GO_BP_m1 | GO:003280 | regulation of                    | 2/2606 | 5/23843 | 0.095407 | 0.504226 | 0.479464 | Anxa2/Pcsk  |
| GO_BP_m1 | GO:003416 | positive regulation of           | 2/2606 | 5/23843 | 0.095407 | 0.504226 | 0.479464 | Ptpn22/Tre  |
| GO_BP_m1 | GO:003502 | negative regulation of           | 2/2606 | 5/23843 | 0.095407 | 0.504226 | 0.479464 | Arhgap44/   |
| GO_BP_m1 | GO:003543 | copper ion transport             | 2/2606 | 5/23843 | 0.095407 | 0.504226 | 0.479464 | Atp7b/Slc3  |
| GO_BP_m1 | GO:003643 | maintenance of                   | 2/2606 | 5/23843 | 0.095407 | 0.504226 | 0.479464 | Foxc1/Gcni  |
| GO_BP_m1 | GO:004212 | nitrate metabolism               | 2/2606 | 5/23843 | 0.095407 | 0.504226 | 0.479464 | Por/Suox    |
| GO_BP_m1 | GO:004290 | response to xenobiotic           | 2/2606 | 5/23843 | 0.095407 | 0.504226 | 0.479464 | Abcc3/Slc2  |
| GO_BP_m1 | GO:004483 | cell quiescence                  | 2/2606 | 5/23843 | 0.095407 | 0.504226 | 0.479464 | Dek/Nanos   |
| GO_BP_m1 | GO:004485 | plasma membrane                  | 2/2606 | 5/23843 | 0.095407 | 0.504226 | 0.479464 | Cav1/Cav3   |
| GO_BP_m1 | GO:004485 | plasma membrane                  | 2/2606 | 5/23843 | 0.095407 | 0.504226 | 0.479464 | Cav1/Cav3   |
| GO_BP_m1 | GO:004563 | positive regulation of           | 2/2606 | 5/23843 | 0.095407 | 0.504226 | 0.479464 | Adamts9/K   |
| GO_BP_m1 | GO:004698 | regulation of                    | 2/2606 | 5/23843 | 0.095407 | 0.504226 | 0.479464 | Eif2ak1/Prr |
| GO_BP_m1 | GO:004835 | positive regulation of           | 2/2606 | 5/23843 | 0.095407 | 0.504226 | 0.479464 | Aldh1a3/A:  |
| GO_BP_m1 | GO:004855 | negative regulation of           | 2/2606 | 5/23843 | 0.095407 | 0.504226 | 0.479464 | Cav1/Nr1h   |
| GO_BP_m1 | GO:005166 | establishment of                 | 2/2606 | 5/23843 | 0.095407 | 0.504226 | 0.479464 | Ezr/Pafah1  |
| GO_BP_m1 | GO:005511 | negative regulation of           | 2/2606 | 5/23843 | 0.095407 | 0.504226 | 0.479464 | Adora1/Zc:  |
| GO_BP_m1 | GO:006155 | glutamate transport              | 2/2606 | 5/23843 | 0.095407 | 0.504226 | 0.479464 | Nf1/Pak1    |
| GO_BP_m1 | GO:007042 | regulation of                    | 2/2606 | 5/23843 | 0.095407 | 0.504226 | 0.479464 | Peli3/Ptpn2 |
| GO_BP_m1 | GO:007043 | regulation of                    | 2/2606 | 5/23843 | 0.095407 | 0.504226 | 0.479464 | Peli3/Ptpn2 |
| GO_BP_m1 | GO:007122 | cellular response to             | 2/2606 | 5/23843 | 0.095407 | 0.504226 | 0.479464 | Nod1/Ptpn   |
| GO_BP_m1 | GO:007160 | macrophage                       | 2/2606 | 5/23843 | 0.095407 | 0.504226 | 0.479464 | Mefv/Trpv4  |
| GO_BP_m1 | GO:007165 | positive regulation of           | 2/2606 | 5/23843 | 0.095407 | 0.504226 | 0.479464 | Ticam2/Trp  |
| GO_BP_m1 | GO:007169 | maintenance of                   | 2/2606 | 5/23843 | 0.095407 | 0.504226 | 0.479464 | Dand5/Fbr   |
| GO_BP_m1 | GO:007184 | TNFSF11-mediated                 | 2/2606 | 5/23843 | 0.095407 | 0.504226 | 0.479464 | Cldn18/Tnf  |
| GO_BP_m1 | GO:007192 | regulation of                    | 2/2606 | 5/23843 | 0.095407 | 0.504226 | 0.479464 | Hdac8/Waj   |
| GO_BP_m1 | GO:007204 | proximal/distal                  | 2/2606 | 5/23843 | 0.095407 | 0.504226 | 0.479464 | Irx2/Osr1   |
| GO_BP_m1 | GO:007208 | specificity                      | 2/2606 | 5/23843 | 0.095407 | 0.504226 | 0.479464 | Irx2/Osr1   |
| GO_BP_m1 | GO:007259 | oxygen metabolism                | 2/2606 | 5/23843 | 0.095407 | 0.504226 | 0.479464 | Fmo2/Mt3    |
| GO_BP_m1 | GO:007271 | response to                      | 2/2606 | 5/23843 | 0.095407 | 0.504226 | 0.479464 | Kdm3b/Slc   |
| GO_BP_m1 | GO:009750 | receptor-like                    | 2/2606 | 5/23843 | 0.095407 | 0.504226 | 0.479464 | Tulp1/Tulp  |
| GO_BP_m1 | GO:009774 | de novo ceramide                 | 2/2606 | 5/23843 | 0.095407 | 0.504226 | 0.479464 | Deup1/Plk4  |
| GO_BP_m1 | GO:009852 | skeletal muscle                  | 2/2606 | 5/23843 | 0.095407 | 0.504226 | 0.479464 | Nln/Tbx1    |
| GO_BP_m1 | GO:009853 | de novo ceramide                 | 2/2606 | 5/23843 | 0.095407 | 0.504226 | 0.479464 | Deup1/Plk4  |
| GO_BP_m1 | GO:009888 | postsynaptic                     | 2/2606 | 5/23843 | 0.095407 | 0.504226 | 0.479464 | Dnm3/Synj   |
| GO_BP_m1 | GO:009890 | regulation of                    | 2/2606 | 5/23843 | 0.095407 | 0.504226 | 0.479464 | Cav3/Fgf13  |
| GO_BP_m1 | GO:009917 | regulation of                    | 2/2606 | 5/23843 | 0.095407 | 0.504226 | 0.479464 | Nlgn3/Snc:  |
| GO_BP_m1 | GO:010604 | regulation of                    | 2/2606 | 5/23843 | 0.095407 | 0.504226 | 0.479464 | Ptgs2/Ybx3  |
| GO_BP_m1 | GO:015000 | regulation of                    | 2/2606 | 5/23843 | 0.095407 | 0.504226 | 0.479464 | Park2/Stx1l |
| GO_BP_m1 | GO:190012 | positive regulation of           | 2/2606 | 5/23843 | 0.095407 | 0.504226 | 0.479464 | Has2/Nfkb   |
| GO_BP_m1 | GO:190221 | regulation of                    | 2/2606 | 5/23843 | 0.095407 | 0.504226 | 0.479464 | Ptgs2/Ybx3  |
| GO_BP_m1 | GO:190254 | negative regulation of           | 2/2606 | 5/23843 | 0.095407 | 0.504226 | 0.479464 | Adgra2/Dc   |
| GO_BP_m1 | GO:190274 | negative regulation of           | 2/2606 | 5/23843 | 0.095407 | 0.504226 | 0.479464 | Cfl1/Plxnb3 |
| GO_BP_m1 | GO:190327 | regulation of                    | 2/2606 | 5/23843 | 0.095407 | 0.504226 | 0.479464 | Atp1b2/Fxy  |
| GO_BP_m1 | GO:190362 | positive regulation of           | 2/2606 | 5/23843 | 0.095407 | 0.504226 | 0.479464 | Endog/Igfb  |
| GO_BP_m1 | GO:190418 | negative regulation of           | 2/2606 | 5/23843 | 0.095407 | 0.504226 | 0.479464 | Bok/Cav3    |
| GO_BP_m1 | GO:190439 | regulation of                    | 2/2606 | 5/23843 | 0.095407 | 0.504226 | 0.479464 | Lrp4/Mesd   |
| GO_BP_m1 | GO:190439 | positive regulation of           | 2/2606 | 5/23843 | 0.095407 | 0.504226 | 0.479464 | Lrp4/Mesd   |

|                                      |           |          |          |          |             |
|--------------------------------------|-----------|----------|----------|----------|-------------|
| GO_BP_m1GO:190587regulation 2/2606   | 5/23843   | 0.095407 | 0.504226 | 0.479464 | Cdh2/Cfl1   |
| GO_BP_m1GO:199051piRNA bios2/2606    | 5/23843   | 0.095407 | 0.504226 | 0.479464 | Btbd18/Dd   |
| GO_BP_m1GO:199074protein sial2/2606  | 5/23843   | 0.095407 | 0.504226 | 0.479464 | St6gal1/St6 |
| GO_BP_m1GO:20004Epositive re2/2606   | 5/23843   | 0.095407 | 0.504226 | 0.479464 | Akap6/Atp   |
| GO_BP_m1GO:200064positive re2/2606   | 5/23843   | 0.095407 | 0.504226 | 0.479464 | Pcsk9/Ptpn  |
| GO_BP_m1GO:20008Epositive re2/2606   | 5/23843   | 0.095407 | 0.504226 | 0.479464 | Galr1/Tac1  |
| GO_BP_m1GO:20012Eregulation 2/2606   | 5/23843   | 0.095407 | 0.504226 | 0.479464 | Mir23a/Mir  |
| GO_BP_m1GO:190121positive re17/2606  | 111/23843 | 0.095413 | 0.504226 | 0.479464 | Aifm1/Cas   |
| GO_BP_m1GO:005122positive re60/2606  | 464/23843 | 0.095477 | 0.504226 | 0.479464 | Abat/Abl2/  |
| GO_BP_m1GO:00099Eanterior/pc31/2606  | 223/23843 | 0.096133 | 0.504226 | 0.479464 | Abi1/Btg2/  |
| GO_BP_m1GO:00305Eneutrophil 14/2606  | 88/23843  | 0.096269 | 0.504226 | 0.479464 | Ccl20/Ccl2: |
| GO_BP_m1GO:190342regulation 14/2606  | 88/23843  | 0.096269 | 0.504226 | 0.479464 | Atp2b4/Ca   |
| GO_BP_m1GO:001604lipid catab40/2606  | 297/23843 | 0.096418 | 0.504226 | 0.479464 | Abcd3/Abf   |
| GO_BP_m1GO:00328Eglomerulus10/2606   | 58/23843  | 0.096493 | 0.504226 | 0.479464 | Basp1/Foxc  |
| GO_BP_m1GO:004574positive re10/2606  | 58/23843  | 0.096493 | 0.504226 | 0.479464 | Calr/Cdc7/  |
| GO_BP_m1GO:19023Cregulation 10/2606  | 58/23843  | 0.096493 | 0.504226 | 0.479464 | Atp1b2/At   |
| GO_BP_m1GO:00070EGolgi organ18/2606  | 119/23843 | 0.096606 | 0.504226 | 0.479464 | Arhgef7/At  |
| GO_BP_m1GO:00170Eprotein im30/2606   | 215/23843 | 0.096731 | 0.504226 | 0.479464 | 1700123L1   |
| GO_BP_m1GO:00439Cregulation 30/2606  | 215/23843 | 0.096731 | 0.504226 | 0.479464 | Anxa2/Arg   |
| GO_BP_m1GO:00700Eglycosylatic29/2606 | 207/23843 | 0.097278 | 0.504226 | 0.479464 | A4gnt/Abc   |
| GO_BP_m1GO:00462Cnitric oxide12/2606 | 73/23843  | 0.097463 | 0.504226 | 0.479464 | Atp2b4/Ca   |
| GO_BP_m1GO:006042regulation 12/2606  | 73/23843  | 0.097463 | 0.504226 | 0.479464 | Akap6/Cav   |
| GO_BP_m1GO:006151myeloid ce12/2606   | 73/23843  | 0.097463 | 0.504226 | 0.479464 | Abi1/Anxa2  |
| GO_BP_m1GO:19045Eregulation 12/2606  | 73/23843  | 0.097463 | 0.504226 | 0.479464 | Cdk1/Cdkn   |
| GO_BP_m1GO:00464Enicotinamic20/2606  | 135/23843 | 0.098161 | 0.504226 | 0.479464 | Bpgm/Eno:   |
| GO_BP_m1GO:19028Emicrotubul20/2606   | 135/23843 | 0.098161 | 0.504226 | 0.479464 | Ankrd53/Br  |
| GO_BP_m1GO:00456Epositive re15/2606  | 96/23843  | 0.098502 | 0.504226 | 0.479464 | Casp8/Ccr1  |
| GO_BP_m1GO:006201positive re26/2606  | 183/23843 | 0.098528 | 0.504226 | 0.479464 | Adcyap1r1.  |
| GO_BP_m1GO:00007EDNA catab5/2606     | 23/23843  | 0.098662 | 0.504226 | 0.479464 | Aifm1/Dffa  |
| GO_BP_m1GO:001657histone del5/2606   | 23/23843  | 0.098662 | 0.504226 | 0.479464 | Asxl1/Kat2: |
| GO_BP_m1GO:001904modulator5/2606     | 23/23843  | 0.098662 | 0.504226 | 0.479464 | Hyal2/Myc.  |
| GO_BP_m1GO:002261DNA strand5/2606    | 23/23843  | 0.098662 | 0.504226 | 0.479464 | Fen1/Lig3/  |
| GO_BP_m1GO:003164heat gener5/2606    | 23/23843  | 0.098662 | 0.504226 | 0.479464 | Abat/Ednrk  |
| GO_BP_m1GO:003237positive re5/2606   | 23/23843  | 0.098662 | 0.504226 | 0.479464 | Abca12/An   |
| GO_BP_m1GO:003237positive re5/2606   | 23/23843  | 0.098662 | 0.504226 | 0.479464 | Abca12/An   |
| GO_BP_m1GO:00328Creceptor bi5/2606   | 23/23843  | 0.098662 | 0.504226 | 0.479464 | Ache/Hdac   |
| GO_BP_m1GO:00466Eresponse tr5/2606   | 23/23843  | 0.098662 | 0.504226 | 0.479464 | Aoc1/Atp7   |
| GO_BP_m1GO:007167positive re5/2606   | 23/23843  | 0.098662 | 0.504226 | 0.479464 | Ccr1/Cxcl1  |
| GO_BP_m1GO:00718Ecellular res5/2606  | 23/23843  | 0.098662 | 0.504226 | 0.479464 | Akap6/Atp   |
| GO_BP_m1GO:00901Epositive re5/2606   | 23/23843  | 0.098662 | 0.504226 | 0.479464 | Gdnf/Lgr4/  |
| GO_BP_m1GO:200067positive re5/2606   | 23/23843  | 0.098662 | 0.504226 | 0.479464 | Ddrk1/Fo:   |
| GO_BP_m1GO:20007Enegative re5/2606   | 23/23843  | 0.098662 | 0.504226 | 0.479464 | Hdac1/Hd    |
| GO_BP_m1GO:00703Cpositive re22/2606  | 151/23843 | 0.098863 | 0.504226 | 0.479464 | 5730559C1   |
| GO_BP_m1GO:00487Cskeletal sys33/2606 | 240/23843 | 0.098901 | 0.504226 | 0.479464 | Alpl/Alx3/C |
| GO_BP_m1GO:003361membrane9/2606      | 51/23843  | 0.099351 | 0.504226 | 0.479464 | Adam8/Ap    |
| GO_BP_m1GO:00487Cembryonic16/2606    | 104/23843 | 0.100253 | 0.504226 | 0.479464 | Alx3/Dscan  |
| GO_BP_m1GO:19034Creactive ox16/2606  | 104/23843 | 0.100253 | 0.504226 | 0.479464 | 5730559C1   |
| GO_BP_m1GO:00508Epositive re58/2606  | 449/23843 | 0.101069 | 0.504226 | 0.479464 | Acta2/Ada   |

|                                |         |           |          |          |          |             |
|--------------------------------|---------|-----------|----------|----------|----------|-------------|
| GO_BP_m1GO:001991lipid storage | 11/2606 | 66/23843  | 0.101475 | 0.504226 | 0.479464 | Angptl3/Ca  |
| GO_BP_m1GO:190357regulation    | 11/2606 | 66/23843  | 0.101475 | 0.504226 | 0.479464 | Cdk1/Esrrb  |
| GO_BP_m1GO:004247odontogen     | 17/2606 | 112/23843 | 0.101604 | 0.504226 | 0.479464 | Ambn/Foxc   |
| GO_BP_m1GO:001908viral transcr | 8/2606  | 44/23843  | 0.101615 | 0.504226 | 0.479464 | Ccl4/Hdac3  |
| GO_BP_m1GO:005088positive reg  | 8/2606  | 44/23843  | 0.101615 | 0.504226 | 0.479464 | Akap6/Ccl4  |
| GO_BP_m1GO:007167regulation    | 8/2606  | 44/23843  | 0.101615 | 0.504226 | 0.479464 | Ccr1/Cxcl1  |
| GO_BP_m1GO:009018positive reg  | 8/2606  | 44/23843  | 0.101615 | 0.504226 | 0.479464 | Gdnf/Lgr4/  |
| GO_BP_m1GO:000709centriole re  | 6/2606  | 30/23843  | 0.102341 | 0.504226 | 0.479464 | Deup1/Cdk   |
| GO_BP_m1GO:000804motor neuron  | 6/2606  | 30/23843  | 0.102341 | 0.504226 | 0.479464 | Cdk5/Chn1   |
| GO_BP_m1GO:001400astrocyte de  | 6/2606  | 30/23843  | 0.102341 | 0.504226 | 0.479464 | Fpr2/Lamb   |
| GO_BP_m1GO:002190dorsal/vent   | 6/2606  | 30/23843  | 0.102341 | 0.504226 | 0.479464 | Foxa2/Prka  |
| GO_BP_m1GO:190342negative re   | 6/2606  | 30/23843  | 0.102341 | 0.504226 | 0.479464 | Atp2b4/Ca   |
| GO_BP_m1GO:190552regulation    | 6/2606  | 30/23843  | 0.102341 | 0.504226 | 0.479464 | Cxcl17/Ddt  |
| GO_BP_m1GO:000282negative re   | 7/2606  | 37/23843  | 0.10286  | 0.504226 | 0.479464 | Arg1/Clec4  |
| GO_BP_m1GO:003588epithelial c  | 7/2606  | 37/23843  | 0.10286  | 0.504226 | 0.479464 | Basp1/Gdn   |
| GO_BP_m1GO:004588positive reg  | 7/2606  | 37/23843  | 0.10286  | 0.504226 | 0.479464 | Foxa2/Ift17 |
| GO_BP_m1GO:004600regulation    | 7/2606  | 37/23843  | 0.10286  | 0.504226 | 0.479464 | Arg1/Gpan   |
| GO_BP_m1GO:004825mRNA stat     | 7/2606  | 37/23843  | 0.10286  | 0.504226 | 0.479464 | Apobec1/N   |
| GO_BP_m1GO:006109positive reg  | 7/2606  | 37/23843  | 0.10286  | 0.504226 | 0.479464 | Adora1/Dc   |
| GO_BP_m1GO:190571positive reg  | 7/2606  | 37/23843  | 0.10286  | 0.504226 | 0.479464 | Bnip3/Bok/  |
| GO_BP_m1GO:200102negative re   | 7/2606  | 37/23843  | 0.10286  | 0.504226 | 0.479464 | Abat/Arl6ip |
| GO_BP_m1GO:000914nucleoside    | 37/2606 | 274/23843 | 0.103318 | 0.504226 | 0.479464 | Adk/Atp5a   |
| GO_BP_m1GO:000666glycolipid r  | 14/2606 | 89/23843  | 0.103338 | 0.504226 | 0.479464 | Abo/B4gal   |
| GO_BP_m1GO:004663regulation    | 14/2606 | 89/23843  | 0.103338 | 0.504226 | 0.479464 | Blm/Cd80/   |
| GO_BP_m1GO:004362cellular pro  | 19/2606 | 128/23843 | 0.103352 | 0.504226 | 0.479464 | Asph/Cfl1/  |
| GO_BP_m1GO:005500cardiac mu    | 19/2606 | 128/23843 | 0.103352 | 0.504226 | 0.479464 | Akap6/Cav   |
| GO_BP_m1GO:007233signal trans  | 20/2606 | 136/23843 | 0.103843 | 0.504226 | 0.479464 | Ankrd1/Atr  |
| GO_BP_m1GO:005254regulation    | 46/2606 | 349/23843 | 0.103913 | 0.504226 | 0.479464 | Aifm1/Alox  |
| GO_BP_m1GO:003133positive reg  | 43/2606 | 324/23843 | 0.104074 | 0.504226 | 0.479464 | Adam8/Ari   |
| GO_BP_m1GO:007252purine-cor    | 36/2606 | 266/23843 | 0.104369 | 0.504226 | 0.479464 | Adcy4/Adk   |
| GO_BP_m1GO:003476negative re   | 15/2606 | 97/23843  | 0.10535  | 0.504226 | 0.479464 | Adra1d/Arl  |
| GO_BP_m1GO:004605cAMP met      | 15/2606 | 97/23843  | 0.10535  | 0.504226 | 0.479464 | Adcy4/Adn   |
| GO_BP_m1GO:003014sphingolipi   | 12/2606 | 74/23843  | 0.105362 | 0.504226 | 0.479464 | Acer3/Asa   |
| GO_BP_m1GO:004286pyruvate bi   | 12/2606 | 74/23843  | 0.105362 | 0.504226 | 0.479464 | Bpgm/Eno    |
| GO_BP_m1GO:007167mononucle     | 12/2606 | 74/23843  | 0.105362 | 0.504226 | 0.479464 | Ccl20/Ccl2  |
| GO_BP_m1GO:004612purine ribo   | 10/2606 | 59/23843  | 0.105404 | 0.504226 | 0.479464 | Acpp/Adk/   |
| GO_BP_m1GO:005098detection c   | 10/2606 | 59/23843  | 0.105404 | 0.504226 | 0.479464 | Cav3/Denn   |
| GO_BP_m1GO:199077protein loc   | 38/2606 | 283/23843 | 0.106216 | 0.504226 | 0.479464 | Abca12/An   |
| GO_BP_m1GO:000182serotonin s   | 4/2606  | 17/23843  | 0.106668 | 0.504226 | 0.479464 | Hrh3/Htr1a  |
| GO_BP_m1GO:000196suckling be   | 4/2606  | 17/23843  | 0.106668 | 0.504226 | 0.479464 | Cntfr/Dach  |
| GO_BP_m1GO:000252leukocyte r   | 4/2606  | 17/23843  | 0.106668 | 0.504226 | 0.479464 | Adam8/Ao    |
| GO_BP_m1GO:000662protein tar   | 4/2606  | 17/23843  | 0.106668 | 0.504226 | 0.479464 | Lonp2/Pex   |
| GO_BP_m1GO:000674ubiquinone    | 4/2606  | 17/23843  | 0.106668 | 0.504226 | 0.479464 | Coq10b/Cc   |
| GO_BP_m1GO:001076negative re   | 4/2606  | 17/23843  | 0.106668 | 0.504226 | 0.479464 | Drd3/Hecw   |
| GO_BP_m1GO:003003microvillus   | 4/2606  | 17/23843  | 0.106668 | 0.504226 | 0.479464 | Atp8b1/Fsc  |
| GO_BP_m1GO:003236intracellula  | 4/2606  | 17/23843  | 0.106668 | 0.504226 | 0.479464 | Anxa2/Ldlr  |
| GO_BP_m1GO:003236intracellula  | 4/2606  | 17/23843  | 0.106668 | 0.504226 | 0.479464 | Anxa2/Ldlr  |
| GO_BP_m1GO:003431diol biosyn   | 4/2606  | 17/23843  | 0.106668 | 0.504226 | 0.479464 | Acer3/Asa   |

|                                      |           |          |          |          |             |
|--------------------------------------|-----------|----------|----------|----------|-------------|
| GO_BP_m1GO:003531wound heal4/2606    | 17/23843  | 0.106668 | 0.504226 | 0.479464 | Col5a1/Mn   |
| GO_BP_m1GO:003952RIG-I signa4/2606   | 17/23843  | 0.106668 | 0.504226 | 0.479464 | Ddx60/Dhx   |
| GO_BP_m1GO:004213neurotrans4/2606    | 17/23843  | 0.106668 | 0.504226 | 0.479464 | Abat/Ache   |
| GO_BP_m1GO:004244hormone c4/2606     | 17/23843  | 0.106668 | 0.504226 | 0.479464 | Ache/Dio2   |
| GO_BP_m1GO:004357peroxisom4/2606     | 17/23843  | 0.106668 | 0.504226 | 0.479464 | Lonp2/Pex   |
| GO_BP_m1GO:004659regulation 4/2606   | 17/23843  | 0.106668 | 0.504226 | 0.479464 | Kat2a/Kat2  |
| GO_BP_m1GO:004814behavioral 4/2606   | 17/23843  | 0.106668 | 0.504226 | 0.479464 | Adh1/Adra   |
| GO_BP_m1GO:004885forebrain n4/2606   | 17/23843  | 0.106668 | 0.504226 | 0.479464 | Ift88/Nf1/S |
| GO_BP_m1GO:006031regulation 4/2606   | 17/23843  | 0.106668 | 0.504226 | 0.479464 | Akap6/Fkb   |
| GO_BP_m1GO:007266protein loc4/2606   | 17/23843  | 0.106668 | 0.504226 | 0.479464 | Lonp2/Pex   |
| GO_BP_m1GO:007266establishm4/2606    | 17/23843  | 0.106668 | 0.504226 | 0.479464 | Lonp2/Pex   |
| GO_BP_m1GO:008018histone H3 4/2606   | 17/23843  | 0.106668 | 0.504226 | 0.479464 | Hist1h1c/C  |
| GO_BP_m1GO:190291regulation 4/2606   | 17/23843  | 0.106668 | 0.504226 | 0.479464 | Nmi/Park2   |
| GO_BP_m1GO:002198cerebral co16/2606  | 105/23843 | 0.10689  | 0.504226 | 0.479464 | Arx/Bbs2/C  |
| GO_BP_m1GO:004814fibroblast f16/2606 | 105/23843 | 0.10689  | 0.504226 | 0.479464 | Anxa2/Cdk   |
| GO_BP_m1GO:004667response tr40/2606  | 300/23843 | 0.107787 | 0.504226 | 0.479464 | Abat/Adh1   |
| GO_BP_m1GO:000072telomere r18/2606   | 121/23843 | 0.108862 | 0.504226 | 0.479464 | Atr/Blm/Cc  |
| GO_BP_m1GO:004848synaptic ve18/2606  | 121/23843 | 0.108862 | 0.504226 | 0.479464 | Bloc1s5/Cc  |
| GO_BP_m1GO:009748establishm18/2606   | 121/23843 | 0.108862 | 0.504226 | 0.479464 | Bloc1s5/Cc  |
| GO_BP_m1GO:190165glycosyl co18/2606  | 121/23843 | 0.108862 | 0.504226 | 0.479464 | Abhd10/Ac   |
| GO_BP_m1GO:004577positive re9/2606   | 52/23843  | 0.109116 | 0.504226 | 0.479464 | Adh5/Ador   |
| GO_BP_m1GO:004583negative re9/2606   | 52/23843  | 0.109116 | 0.504226 | 0.479464 | Klhl22/Mac  |
| GO_BP_m1GO:004667negative re9/2606   | 52/23843  | 0.109116 | 0.504226 | 0.479464 | Fkbp1b/Hc   |
| GO_BP_m1GO:005087multicellula9/2606  | 52/23843  | 0.109116 | 0.504226 | 0.479464 | Cav3/Chrn   |
| GO_BP_m1GO:005088musculoske9/2606    | 52/23843  | 0.109116 | 0.504226 | 0.479464 | Cav3/Chrn   |
| GO_BP_m1GO:000705chromosom42/2606    | 317/23843 | 0.109116 | 0.504226 | 0.479464 | Ankrd53/Te  |
| GO_BP_m1GO:001077positive re24/2606  | 169/23843 | 0.109294 | 0.504226 | 0.479464 | Ache/Calr/  |
| GO_BP_m1GO:000001vacuole int1/2606   | 1/23843   | 0.109298 | 0.504226 | 0.479464 | Rbsn        |
| GO_BP_m1GO:000008mitotic M f1/2606   | 1/23843   | 0.109298 | 0.504226 | 0.479464 | Cdc20       |
| GO_BP_m1GO:000008mitotic me1/2606    | 1/23843   | 0.109298 | 0.504226 | 0.479464 | Cdc20       |
| GO_BP_m1GO:000198negative re1/2606   | 1/23843   | 0.109298 | 0.504226 | 0.479464 | Adra1d      |
| GO_BP_m1GO:000201vasoconstr1/2606    | 1/23843   | 0.109298 | 0.504226 | 0.479464 | Manf        |
| GO_BP_m1GO:000204blood vess1/2606    | 1/23843   | 0.109298 | 0.504226 | 0.479464 | Lemd3       |
| GO_BP_m1GO:000229CD4-positi1/2606    | 1/23843   | 0.109298 | 0.504226 | 0.479464 | Ifnf        |
| GO_BP_m1GO:000229alpha-beta1/2606    | 1/23843   | 0.109298 | 0.504226 | 0.479464 | Gpr18       |
| GO_BP_m1GO:000230CD8-positi1/2606    | 1/23843   | 0.109298 | 0.504226 | 0.479464 | Gpr18       |
| GO_BP_m1GO:000230MHC class 1/2606    | 1/23843   | 0.109298 | 0.504226 | 0.479464 | Calr        |
| GO_BP_m1GO:000250peptide an1/2606    | 1/23843   | 0.109298 | 0.504226 | 0.479464 | Calr        |
| GO_BP_m1GO:000253prostaglan1/2606    | 1/23843   | 0.109298 | 0.504226 | 0.479464 | Ephx2       |
| GO_BP_m1GO:000273negative re1/2606   | 1/23843   | 0.109298 | 0.504226 | 0.479464 | Jak3        |
| GO_BP_m1GO:000287negative re1/2606   | 1/23843   | 0.109298 | 0.504226 | 0.479464 | Il10        |
| GO_BP_m1GO:000293tendon she1/2606    | 1/23843   | 0.109298 | 0.504226 | 0.479464 | Mkx         |
| GO_BP_m1GO:000313negative re1/2606   | 1/23843   | 0.109298 | 0.504226 | 0.479464 | Wnt3a       |
| GO_BP_m1GO:000340regulation 1/2606   | 1/23843   | 0.109298 | 0.504226 | 0.479464 | Preb        |
| GO_BP_m1GO:000599trehalose c1/2606   | 1/23843   | 0.109298 | 0.504226 | 0.479464 | Pgghg       |
| GO_BP_m1GO:000611acetaldehy1/2606    | 1/23843   | 0.109298 | 0.504226 | 0.479464 | Adh1        |
| GO_BP_m1GO:000614guanine ca1/2606    | 1/23843   | 0.109298 | 0.504226 | 0.479464 | Gda         |
| GO_BP_m1GO:000616adenosine 1/2606    | 1/23843   | 0.109298 | 0.504226 | 0.479464 | Adk         |



|                                      |         |          |          |          |          |
|--------------------------------------|---------|----------|----------|----------|----------|
| GO_BP_m1GO:000617dATP biosy1/2606    | 1/23843 | 0.109298 | 0.504226 | 0.479464 | Adk      |
| GO_BP_m1GO:000621thymidine r1/2606   | 1/23843 | 0.109298 | 0.504226 | 0.479464 | Dpyd     |
| GO_BP_m1GO:000628base-excisi1/2606   | 1/23843 | 0.109298 | 0.504226 | 0.479464 | Lig3     |
| GO_BP_m1GO:000643lysyl-tRNA 1/2606   | 1/23843 | 0.109298 | 0.504226 | 0.479464 | Kars     |
| GO_BP_m1GO:000658acetylcholin1/2606  | 1/23843 | 0.109298 | 0.504226 | 0.479464 | Ache     |
| GO_BP_m1GO:000658dopamine 1/2606     | 1/23843 | 0.109298 | 0.504226 | 0.479464 | Th       |
| GO_BP_m1GO:000659ornithine c1/2606   | 1/23843 | 0.109298 | 0.504226 | 0.479464 | Otc      |
| GO_BP_m1GO:000667phytosphin1/2606    | 1/23843 | 0.109298 | 0.504226 | 0.479464 | Acer3    |
| GO_BP_m1GO:000719adenylate r1/2606   | 1/23843 | 0.109298 | 0.504226 | 0.479464 | Htr7     |
| GO_BP_m1GO:000729sperm indiv1/2606   | 1/23843 | 0.109298 | 0.504226 | 0.479464 | Spem1    |
| GO_BP_m1GO:000734cellularizati1/2606 | 1/23843 | 0.109298 | 0.504226 | 0.479464 | Spem1    |
| GO_BP_m1GO:000737ventral mic1/2606   | 1/23843 | 0.109298 | 0.504226 | 0.479464 | Smo      |
| GO_BP_m1GO:000740ganglion n1/2606    | 1/23843 | 0.109298 | 0.504226 | 0.479464 | Ntf5     |
| GO_BP_m1GO:000749posterior n1/2606   | 1/23843 | 0.109298 | 0.504226 | 0.479464 | Ednrb    |
| GO_BP_m1GO:000805sensory or1/2606    | 1/23843 | 0.109298 | 0.504226 | 0.479464 | Ntf5     |
| GO_BP_m1GO:000865lipopolysac1/2606   | 1/23843 | 0.109298 | 0.504226 | 0.479464 | Aoah     |
| GO_BP_m1GO:000923cobalamin 1/2606    | 1/23843 | 0.109298 | 0.504226 | 0.479464 | Mmachc   |
| GO_BP_m1GO:000923siderophor1/2606    | 1/23843 | 0.109298 | 0.504226 | 0.479464 | Bdh2     |
| GO_BP_m1GO:000930protein bio1/2606   | 1/23843 | 0.109298 | 0.504226 | 0.479464 | Hlcs     |
| GO_BP_m1GO:000937quorum se 1/2606    | 1/23843 | 0.109298 | 0.504226 | 0.479464 | Slc22a5  |
| GO_BP_m1GO:000981stilbene m1/2606    | 1/23843 | 0.109298 | 0.504226 | 0.479464 | Ephx2    |
| GO_BP_m1GO:000999negative re1/2606   | 1/23843 | 0.109298 | 0.504226 | 0.479464 | Wnt3a    |
| GO_BP_m1GO:001016formation r1/2606   | 1/23843 | 0.109298 | 0.504226 | 0.479464 | Ntf5     |
| GO_BP_m1GO:001018vitamin E b1/2606   | 1/23843 | 0.109298 | 0.504226 | 0.479464 | Pltp     |
| GO_BP_m1GO:001031detoxicicati1/2606  | 1/23843 | 0.109298 | 0.504226 | 0.479464 | Slc30a3  |
| GO_BP_m1GO:001033response tr1/2606   | 1/23843 | 0.109298 | 0.504226 | 0.479464 | Ptgs2    |
| GO_BP_m1GO:001079regulation 1/2606   | 1/23843 | 0.109298 | 0.504226 | 0.479464 | Coq3     |
| GO_BP_m1GO:001405negative re1/2606   | 1/23843 | 0.109298 | 0.504226 | 0.479464 | Htr6     |
| GO_BP_m1GO:001568molybdate 1/2606    | 1/23843 | 0.109298 | 0.504226 | 0.479464 | Mfsd5    |
| GO_BP_m1GO:001578UDP-gluco1/2606     | 1/23843 | 0.109298 | 0.504226 | 0.479464 | Slc35c2  |
| GO_BP_m1GO:001589amiloride t1/2606   | 1/23843 | 0.109298 | 0.504226 | 0.479464 | Aoc1     |
| GO_BP_m1GO:001594formate m1/2606     | 1/23843 | 0.109298 | 0.504226 | 0.479464 | Mthfd1l  |
| GO_BP_m1GO:001800N-terminal1/2606    | 1/23843 | 0.109298 | 0.504226 | 0.479464 | Map6d1   |
| GO_BP_m1GO:001811protein ad1/2606    | 1/23843 | 0.109298 | 0.504226 | 0.479464 | Ficd     |
| GO_BP_m1GO:001817protein nuc1/2606   | 1/23843 | 0.109298 | 0.504226 | 0.479464 | Ficd     |
| GO_BP_m1GO:001831molybden1/2606      | 1/23843 | 0.109298 | 0.504226 | 0.479464 | Gphn     |
| GO_BP_m1GO:001887arsonoacet1/2606    | 1/23843 | 0.109298 | 0.504226 | 0.479464 | As3mt    |
| GO_BP_m1GO:0018964-nitrophe1/2606    | 1/23843 | 0.109298 | 0.504226 | 0.479464 | Sult1a1  |
| GO_BP_m1GO:001923siderophor1/2606    | 1/23843 | 0.109298 | 0.504226 | 0.479464 | Bdh2     |
| GO_BP_m1GO:001939glucuronos1/2606    | 1/23843 | 0.109298 | 0.504226 | 0.479464 | Abhd10   |
| GO_BP_m1GO:002168cerebellar r1/2606  | 1/23843 | 0.109298 | 0.504226 | 0.479464 | Cend1    |
| GO_BP_m1GO:002176nucleus ac1/2606    | 1/23843 | 0.109298 | 0.504226 | 0.479464 | Aldh1a3  |
| GO_BP_m1GO:002199initiation of1/2606 | 1/23843 | 0.109298 | 0.504226 | 0.479464 | Kdm2b    |
| GO_BP_m1GO:003045regulation 1/2606   | 1/23843 | 0.109298 | 0.504226 | 0.479464 | Susd4    |
| GO_BP_m1GO:003193mitochond1/2606     | 1/23843 | 0.109298 | 0.504226 | 0.479464 | Slc25a33 |
| GO_BP_m1GO:003202trypsinoge1/2606    | 1/23843 | 0.109298 | 0.504226 | 0.479464 | Cuzd1    |
| GO_BP_m1GO:003211regulation 1/2606   | 1/23843 | 0.109298 | 0.504226 | 0.479464 | Ifng     |
| GO_BP_m1GO:003222negative re1/2606   | 1/23843 | 0.109298 | 0.504226 | 0.479464 | Htr6     |

|          |           |               |        |         |          |          |          |           |
|----------|-----------|---------------|--------|---------|----------|----------|----------|-----------|
| GO_BP_m1 | GO:003224 | regulation    | 1/2606 | 1/23843 | 0.109298 | 0.504226 | 0.479464 | Adora1    |
| GO_BP_m1 | GO:003224 | positive re   | 1/2606 | 1/23843 | 0.109298 | 0.504226 | 0.479464 | Adora1    |
| GO_BP_m1 | GO:003237 | negative re   | 1/2606 | 1/23843 | 0.109298 | 0.504226 | 0.479464 | Pcsk9     |
| GO_BP_m1 | GO:003238 | negative re   | 1/2606 | 1/23843 | 0.109298 | 0.504226 | 0.479464 | Pcsk9     |
| GO_BP_m1 | GO:003238 | negative re   | 1/2606 | 1/23843 | 0.109298 | 0.504226 | 0.479464 | Pcsk9     |
| GO_BP_m1 | GO:003281 | positive re   | 1/2606 | 1/23843 | 0.109298 | 0.504226 | 0.479464 | Cartpt    |
| GO_BP_m1 | GO:003283 | regulation    | 1/2606 | 1/23843 | 0.109298 | 0.504226 | 0.479464 | lfng      |
| GO_BP_m1 | GO:003283 | positive re   | 1/2606 | 1/23843 | 0.109298 | 0.504226 | 0.479464 | lfng      |
| GO_BP_m1 | GO:003290 | negative re   | 1/2606 | 1/23843 | 0.109298 | 0.504226 | 0.479464 | Adora1    |
| GO_BP_m1 | GO:003323 | carbohydrate  | 1/2606 | 1/23843 | 0.109298 | 0.504226 | 0.479464 | Abcb1a    |
| GO_BP_m1 | GO:003324 | regulation    | 1/2606 | 1/23843 | 0.109298 | 0.504226 | 0.479464 | Atp2b4    |
| GO_BP_m1 | GO:003324 | negative re   | 1/2606 | 1/23843 | 0.109298 | 0.504226 | 0.479464 | Atp2b4    |
| GO_BP_m1 | GO:003331 | meiotic spi   | 1/2606 | 1/23843 | 0.109298 | 0.504226 | 0.479464 | Ttk       |
| GO_BP_m1 | GO:003417 | regulation    | 1/2606 | 1/23843 | 0.109298 | 0.504226 | 0.479464 | Trem14    |
| GO_BP_m1 | GO:003418 | positive re   | 1/2606 | 1/23843 | 0.109298 | 0.504226 | 0.479464 | Trem14    |
| GO_BP_m1 | GO:003512 | post-embr     | 1/2606 | 1/23843 | 0.109298 | 0.504226 | 0.479464 | Mir23a    |
| GO_BP_m1 | GO:003522 | regulation    | 1/2606 | 1/23843 | 0.109298 | 0.504226 | 0.479464 | Gclm      |
| GO_BP_m1 | GO:003522 | positive re   | 1/2606 | 1/23843 | 0.109298 | 0.504226 | 0.479464 | Gclm      |
| GO_BP_m1 | GO:003540 | histone H3    | 1/2606 | 1/23843 | 0.109298 | 0.504226 | 0.479464 | Pkn1      |
| GO_BP_m1 | GO:003564 | phosphoar     | 1/2606 | 1/23843 | 0.109298 | 0.504226 | 0.479464 | Ptpn22    |
| GO_BP_m1 | GO:003564 | enteric smc   | 1/2606 | 1/23843 | 0.109298 | 0.504226 | 0.479464 | Ednrb     |
| GO_BP_m1 | GO:003565 | Wnt signali   | 1/2606 | 1/23843 | 0.109298 | 0.504226 | 0.479464 | Wnt7a     |
| GO_BP_m1 | GO:003585 | chromosom     | 1/2606 | 1/23843 | 0.109298 | 0.504226 | 0.479464 | Klhl21    |
| GO_BP_m1 | GO:003587 | cellular res  | 1/2606 | 1/23843 | 0.109298 | 0.504226 | 0.479464 | Aoc1      |
| GO_BP_m1 | GO:003591 | pore forma    | 1/2606 | 1/23843 | 0.109298 | 0.504226 | 0.479464 | Gsdmd     |
| GO_BP_m1 | GO:003607 | N-glycan fi   | 1/2606 | 1/23843 | 0.109298 | 0.504226 | 0.479464 | Fut8      |
| GO_BP_m1 | GO:003608 | GDP-fucos     | 1/2606 | 1/23843 | 0.109298 | 0.504226 | 0.479464 | Slc35c1   |
| GO_BP_m1 | GO:003611 | very long-c   | 1/2606 | 1/23843 | 0.109298 | 0.504226 | 0.479464 | Hsd17b4   |
| GO_BP_m1 | GO:003633 | intestinal st | 1/2606 | 1/23843 | 0.109298 | 0.504226 | 0.479464 | Lgr4      |
| GO_BP_m1 | GO:003800 | regulation    | 1/2606 | 1/23843 | 0.109298 | 0.504226 | 0.479464 | Cav3      |
| GO_BP_m1 | GO:003800 | nitric oxide  | 1/2606 | 1/23843 | 0.109298 | 0.504226 | 0.479464 | Kcnc2     |
| GO_BP_m1 | GO:003809 | sequesterir   | 1/2606 | 1/23843 | 0.109298 | 0.504226 | 0.479464 | Grem2     |
| GO_BP_m1 | GO:003810 | sequesterir   | 1/2606 | 1/23843 | 0.109298 | 0.504226 | 0.479464 | Dand5     |
| GO_BP_m1 | GO:004204 | metal incor   | 1/2606 | 1/23843 | 0.109298 | 0.504226 | 0.479464 | Gphn      |
| GO_BP_m1 | GO:004230 | phosphage     | 1/2606 | 1/23843 | 0.109298 | 0.504226 | 0.479464 | Ckm       |
| GO_BP_m1 | GO:004268 | cardioblast   | 1/2606 | 1/23843 | 0.109298 | 0.504226 | 0.479464 | Wnt3a     |
| GO_BP_m1 | GO:004268 | cardioblast   | 1/2606 | 1/23843 | 0.109298 | 0.504226 | 0.479464 | Wnt3a     |
| GO_BP_m1 | GO:004268 | regulation    | 1/2606 | 1/23843 | 0.109298 | 0.504226 | 0.479464 | Wnt3a     |
| GO_BP_m1 | GO:004321 | daunorubic    | 1/2606 | 1/23843 | 0.109298 | 0.504226 | 0.479464 | Abcb1a    |
| GO_BP_m1 | GO:004325 | sodium-de     | 1/2606 | 1/23843 | 0.109298 | 0.504226 | 0.479464 | Slc10a6   |
| GO_BP_m1 | GO:004337 | positive re   | 1/2606 | 1/23843 | 0.109298 | 0.504226 | 0.479464 | Nckap1l   |
| GO_BP_m1 | GO:004348 | pigment ac    | 1/2606 | 1/23843 | 0.109298 | 0.504226 | 0.479464 | Krtap21-1 |
| GO_BP_m1 | GO:004360 | nitrate cata  | 1/2606 | 1/23843 | 0.109298 | 0.504226 | 0.479464 | Por       |
| GO_BP_m1 | GO:004393 | ossification  | 1/2606 | 1/23843 | 0.109298 | 0.504226 | 0.479464 | Cthrc1    |
| GO_BP_m1 | GO:004403 | multi-orga    | 1/2606 | 1/23843 | 0.109298 | 0.504226 | 0.479464 | Anxa2     |
| GO_BP_m1 | GO:004403 | multi-orga    | 1/2606 | 1/23843 | 0.109298 | 0.504226 | 0.479464 | Anxa2     |
| GO_BP_m1 | GO:004411 | developme     | 1/2606 | 1/23843 | 0.109298 | 0.504226 | 0.479464 | Anxa2     |
| GO_BP_m1 | GO:004411 | developme     | 1/2606 | 1/23843 | 0.109298 | 0.504226 | 0.479464 | Anxa2     |

|                               |        |         |          |          |          |            |
|-------------------------------|--------|---------|----------|----------|----------|------------|
| GO_BP_m1GO:004414modulator    | 1/2606 | 1/23843 | 0.109298 | 0.504226 | 0.479464 | Anxa2      |
| GO_BP_m1GO:004414negative re  | 1/2606 | 1/23843 | 0.109298 | 0.504226 | 0.479464 | Anxa2      |
| GO_BP_m1GO:004477meiotic spi  | 1/2606 | 1/23843 | 0.109298 | 0.504226 | 0.479464 | Ttk        |
| GO_BP_m1GO:004479negative re  | 1/2606 | 1/23843 | 0.109298 | 0.504226 | 0.479464 | Vapb       |
| GO_BP_m1GO:004485plasma me    | 1/2606 | 1/23843 | 0.109298 | 0.504226 | 0.479464 | Gsn        |
| GO_BP_m1GO:004485plasma me    | 1/2606 | 1/23843 | 0.109298 | 0.504226 | 0.479464 | Gsn        |
| GO_BP_m1GO:004485plasma me    | 1/2606 | 1/23843 | 0.109298 | 0.504226 | 0.479464 | Gsn        |
| GO_BP_m1GO:004509negative re  | 1/2606 | 1/23843 | 0.109298 | 0.504226 | 0.479464 | Nfkb1      |
| GO_BP_m1GO:004516asymmetric   | 1/2606 | 1/23843 | 0.109298 | 0.504226 | 0.479464 | Wnt7a      |
| GO_BP_m1GO:004521regulation   | 1/2606 | 1/23843 | 0.109298 | 0.504226 | 0.479464 | Jak3       |
| GO_BP_m1GO:004522negative re  | 1/2606 | 1/23843 | 0.109298 | 0.504226 | 0.479464 | Jak3       |
| GO_BP_m1GO:004535negative re  | 1/2606 | 1/23843 | 0.109298 | 0.504226 | 0.479464 | Nmi        |
| GO_BP_m1GO:004579positive re  | 1/2606 | 1/23843 | 0.109298 | 0.504226 | 0.479464 | Slc12a2    |
| GO_BP_m1GO:004595negative re  | 1/2606 | 1/23843 | 0.109298 | 0.504226 | 0.479464 | Susd4      |
| GO_BP_m1GO:004595negative re  | 1/2606 | 1/23843 | 0.109298 | 0.504226 | 0.479464 | Susd4      |
| GO_BP_m1GO:004612pyrimidine   | 1/2606 | 1/23843 | 0.109298 | 0.504226 | 0.479464 | Dpyd       |
| GO_BP_m1GO:004618acetaldehy   | 1/2606 | 1/23843 | 0.109298 | 0.504226 | 0.479464 | Adh1       |
| GO_BP_m1GO:004621nitric oxide | 1/2606 | 1/23843 | 0.109298 | 0.504226 | 0.479464 | Por        |
| GO_BP_m1GO:004627stilbene cat | 1/2606 | 1/23843 | 0.109298 | 0.504226 | 0.479464 | Ephx2      |
| GO_BP_m1GO:004631phosphocr    | 1/2606 | 1/23843 | 0.109298 | 0.504226 | 0.479464 | Ckm        |
| GO_BP_m1GO:004635disaccharid  | 1/2606 | 1/23843 | 0.109298 | 0.504226 | 0.479464 | Pgghg      |
| GO_BP_m1GO:004639UDP-glucu    | 1/2606 | 1/23843 | 0.109298 | 0.504226 | 0.479464 | Csgalnact1 |
| GO_BP_m1GO:004649L-methylm    | 1/2606 | 1/23843 | 0.109298 | 0.504226 | 0.479464 | Mcee       |
| GO_BP_m1GO:004658regulation   | 1/2606 | 1/23843 | 0.109298 | 0.504226 | 0.479464 | Kifap3     |
| GO_BP_m1GO:004658positive re  | 1/2606 | 1/23843 | 0.109298 | 0.504226 | 0.479464 | Kifap3     |
| GO_BP_m1GO:004667positive re  | 1/2606 | 1/23843 | 0.109298 | 0.504226 | 0.479464 | Casp6      |
| GO_BP_m1GO:004672lactic acid  | 1/2606 | 1/23843 | 0.109298 | 0.504226 | 0.479464 | Myc        |
| GO_BP_m1GO:004698negative re  | 1/2606 | 1/23843 | 0.109298 | 0.504226 | 0.479464 | Eif2ak1    |
| GO_BP_m1GO:004805compound     | 1/2606 | 1/23843 | 0.109298 | 0.504226 | 0.479464 | Abcb5      |
| GO_BP_m1GO:004813spermatoc    | 1/2606 | 1/23843 | 0.109298 | 0.504226 | 0.479464 | Topaz1     |
| GO_BP_m1GO:004833positive re  | 1/2606 | 1/23843 | 0.109298 | 0.504226 | 0.479464 | Wnt3a      |
| GO_BP_m1GO:004879spontaneo    | 1/2606 | 1/23843 | 0.109298 | 0.504226 | 0.479464 | Syt12      |
| GO_BP_m1GO:004887homeostas    | 1/2606 | 1/23843 | 0.109298 | 0.504226 | 0.479464 | Slc22a5    |
| GO_BP_m1GO:005065chondroitir  | 1/2606 | 1/23843 | 0.109298 | 0.504226 | 0.479464 | Csgalnact1 |
| GO_BP_m1GO:005071interleukin  | 1/2606 | 1/23843 | 0.109298 | 0.504226 | 0.479464 | Ccl20      |
| GO_BP_m1GO:005072regulation   | 1/2606 | 1/23843 | 0.109298 | 0.504226 | 0.479464 | Ccl20      |
| GO_BP_m1GO:005072positive re  | 1/2606 | 1/23843 | 0.109298 | 0.504226 | 0.479464 | Ccl20      |
| GO_BP_m1GO:005103negative re  | 1/2606 | 1/23843 | 0.109298 | 0.504226 | 0.479464 | Zfp386     |
| GO_BP_m1GO:005106dihydrobio   | 1/2606 | 1/23843 | 0.109298 | 0.504226 | 0.479464 | Gch1       |
| GO_BP_m1GO:005123meiotic spi  | 1/2606 | 1/23843 | 0.109298 | 0.504226 | 0.479464 | Ppp2r1a    |
| GO_BP_m1GO:005132metaphase    | 1/2606 | 1/23843 | 0.109298 | 0.504226 | 0.479464 | Cdc20      |
| GO_BP_m1GO:005139regulation   | 1/2606 | 1/23843 | 0.109298 | 0.504226 | 0.479464 | Cav3       |
| GO_BP_m1GO:005146negative re  | 1/2606 | 1/23843 | 0.109298 | 0.504226 | 0.479464 | Crhbp      |
| GO_BP_m1GO:005151regulation   | 1/2606 | 1/23843 | 0.109298 | 0.504226 | 0.479464 | Cfl1       |
| GO_BP_m1GO:005151negative re  | 1/2606 | 1/23843 | 0.109298 | 0.504226 | 0.479464 | Cfl1       |
| GO_BP_m1GO:005158negative re  | 1/2606 | 1/23843 | 0.109298 | 0.504226 | 0.479464 | Snca       |
| GO_BP_m1GO:005162norepinepl   | 1/2606 | 1/23843 | 0.109298 | 0.504226 | 0.479464 | Snca       |
| GO_BP_m1GO:005162regulation   | 1/2606 | 1/23843 | 0.109298 | 0.504226 | 0.479464 | Snca       |

|          |           |             |        |         |          |          |          |         |
|----------|-----------|-------------|--------|---------|----------|----------|----------|---------|
| GO_BP_m1 | GO:005162 | negative re | 1/2606 | 1/23843 | 0.109298 | 0.504226 | 0.479464 | Snca    |
| GO_BP_m1 | GO:005178 | behavioral  | 1/2606 | 1/23843 | 0.109298 | 0.504226 | 0.479464 | Slc16a1 |
| GO_BP_m1 | GO:005194 | negative re | 1/2606 | 1/23843 | 0.109298 | 0.504226 | 0.479464 | Snca    |
| GO_BP_m1 | GO:005209 | interspecie | 1/2606 | 1/23843 | 0.109298 | 0.504226 | 0.479464 | Slc22a5 |
| GO_BP_m1 | GO:00521C | quorum se   | 1/2606 | 1/23843 | 0.109298 | 0.504226 | 0.479464 | Slc22a5 |
| GO_BP_m1 | GO:005221 | metabolisn  | 1/2606 | 1/23843 | 0.109298 | 0.504226 | 0.479464 | Anxa2   |
| GO_BP_m1 | GO:005222 | catabolism  | 1/2606 | 1/23843 | 0.109298 | 0.504226 | 0.479464 | Anxa2   |
| GO_BP_m1 | GO:005222 | metabolisn  | 1/2606 | 1/23843 | 0.109298 | 0.504226 | 0.479464 | Anxa2   |
| GO_BP_m1 | GO:005236 | catabolism  | 1/2606 | 1/23843 | 0.109298 | 0.504226 | 0.479464 | Anxa2   |
| GO_BP_m1 | GO:005236 | catabolism  | 1/2606 | 1/23843 | 0.109298 | 0.504226 | 0.479464 | Anxa2   |
| GO_BP_m1 | GO:005236 | catabolism  | 1/2606 | 1/23843 | 0.109298 | 0.504226 | 0.479464 | Anxa2   |
| GO_BP_m1 | GO:005236 | catabolism  | 1/2606 | 1/23843 | 0.109298 | 0.504226 | 0.479464 | Anxa2   |
| GO_BP_m1 | GO:005236 | catabolism  | 1/2606 | 1/23843 | 0.109298 | 0.504226 | 0.479464 | Anxa2   |
| GO_BP_m1 | GO:005241 | metabolisn  | 1/2606 | 1/23843 | 0.109298 | 0.504226 | 0.479464 | Anxa2   |
| GO_BP_m1 | GO:005241 | metabolisn  | 1/2606 | 1/23843 | 0.109298 | 0.504226 | 0.479464 | Anxa2   |
| GO_BP_m1 | GO:005241 | metabolisn  | 1/2606 | 1/23843 | 0.109298 | 0.504226 | 0.479464 | Anxa2   |
| GO_BP_m1 | GO:005241 | metabolisn  | 1/2606 | 1/23843 | 0.109298 | 0.504226 | 0.479464 | Anxa2   |
| GO_BP_m1 | GO:006003 | notochord   | 1/2606 | 1/23843 | 0.109298 | 0.504226 | 0.479464 | Epha2   |
| GO_BP_m1 | GO:006003 | notochord   | 1/2606 | 1/23843 | 0.109298 | 0.504226 | 0.479464 | Epha2   |
| GO_BP_m1 | GO:006023 | delaminatic | 1/2606 | 1/23843 | 0.109298 | 0.504226 | 0.479464 | Trpv4   |
| GO_BP_m1 | GO:006024 | detection c | 1/2606 | 1/23843 | 0.109298 | 0.504226 | 0.479464 | Smo     |
| GO_BP_m1 | GO:006024 | detection c | 1/2606 | 1/23843 | 0.109298 | 0.504226 | 0.479464 | Smo     |
| GO_BP_m1 | GO:006024 | detection c | 1/2606 | 1/23843 | 0.109298 | 0.504226 | 0.479464 | Smo     |
| GO_BP_m1 | GO:006029 | negative re | 1/2606 | 1/23843 | 0.109298 | 0.504226 | 0.479464 | Cav3    |
| GO_BP_m1 | GO:006034 | spleen trab | 1/2606 | 1/23843 | 0.109298 | 0.504226 | 0.479464 | Slc40a1 |
| GO_BP_m1 | GO:006054 | regulation  | 1/2606 | 1/23843 | 0.109298 | 0.504226 | 0.479464 | lfng    |
| GO_BP_m1 | GO:006055 | positive re | 1/2606 | 1/23843 | 0.109298 | 0.504226 | 0.479464 | lfng    |
| GO_BP_m1 | GO:006055 | regulation  | 1/2606 | 1/23843 | 0.109298 | 0.504226 | 0.479464 | lfng    |
| GO_BP_m1 | GO:006055 | positive re | 1/2606 | 1/23843 | 0.109298 | 0.504226 | 0.479464 | lfng    |
| GO_BP_m1 | GO:006068 | regulation  | 1/2606 | 1/23843 | 0.109298 | 0.504226 | 0.479464 | Pdgfa   |
| GO_BP_m1 | GO:006073 | positive re | 1/2606 | 1/23843 | 0.109298 | 0.504226 | 0.479464 | Slc22a5 |
| GO_BP_m1 | GO:006116 | endoplasm   | 1/2606 | 1/23843 | 0.109298 | 0.504226 | 0.479464 | Shtn1   |
| GO_BP_m1 | GO:006144 | endocardia  | 1/2606 | 1/23843 | 0.109298 | 0.504226 | 0.479464 | Jag1    |
| GO_BP_m1 | GO:006148 | memory T    | 1/2606 | 1/23843 | 0.109298 | 0.504226 | 0.479464 | Dock8   |
| GO_BP_m1 | GO:006152 | aspartate s | 1/2606 | 1/23843 | 0.109298 | 0.504226 | 0.479464 | Abat    |
| GO_BP_m1 | GO:006157 | actin filam | 1/2606 | 1/23843 | 0.109298 | 0.504226 | 0.479464 | Shtn1   |
| GO_BP_m1 | GO:006158 | colon epith | 1/2606 | 1/23843 | 0.109298 | 0.504226 | 0.479464 | Arsb    |
| GO_BP_m1 | GO:006177 | drug trans  | 1/2606 | 1/23843 | 0.109298 | 0.504226 | 0.479464 | Cldn1   |
| GO_BP_m1 | GO:006186 | hepatic ste | 1/2606 | 1/23843 | 0.109298 | 0.504226 | 0.479464 | Acta2   |
| GO_BP_m1 | GO:006186 | regulation  | 1/2606 | 1/23843 | 0.109298 | 0.504226 | 0.479464 | Acta2   |
| GO_BP_m1 | GO:006187 | positive re | 1/2606 | 1/23843 | 0.109298 | 0.504226 | 0.479464 | Acta2   |
| GO_BP_m1 | GO:006187 | hepatic ste | 1/2606 | 1/23843 | 0.109298 | 0.504226 | 0.479464 | Acta2   |
| GO_BP_m1 | GO:006187 | regulation  | 1/2606 | 1/23843 | 0.109298 | 0.504226 | 0.479464 | Acta2   |
| GO_BP_m1 | GO:006187 | positive re | 1/2606 | 1/23843 | 0.109298 | 0.504226 | 0.479464 | Acta2   |
| GO_BP_m1 | GO:00619C | regulation  | 1/2606 | 1/23843 | 0.109298 | 0.504226 | 0.479464 | Fpr2    |
| GO_BP_m1 | GO:00619C | positive re | 1/2606 | 1/23843 | 0.109298 | 0.504226 | 0.479464 | Fpr2    |
| GO_BP_m1 | GO:00619E | negative re | 1/2606 | 1/23843 | 0.109298 | 0.504226 | 0.479464 | Foxa2   |
| GO_BP_m1 | GO:00619E | negative re | 1/2606 | 1/23843 | 0.109298 | 0.504226 | 0.479464 | Foxa2   |

|                                |        |         |          |          |          |          |
|--------------------------------|--------|---------|----------|----------|----------|----------|
| GO_BP_m1GO:007034positive re   | 1/2606 | 1/23843 | 0.109298 | 0.504226 | 0.479464 | Fgf16    |
| GO_BP_m1GO:007054response tr   | 1/2606 | 1/23843 | 0.109298 | 0.504226 | 0.479464 | Cd36     |
| GO_BP_m1GO:00706&seminal clo   | 1/2606 | 1/23843 | 0.109298 | 0.504226 | 0.479464 | Klk14    |
| GO_BP_m1GO:007071sodium-de     | 1/2606 | 1/23843 | 0.109298 | 0.504226 | 0.479464 | Slc22a5  |
| GO_BP_m1GO:00707&response tr   | 1/2606 | 1/23843 | 0.109298 | 0.504226 | 0.479464 | Hlcs     |
| GO_BP_m1GO:007111histone bio   | 1/2606 | 1/23843 | 0.109298 | 0.504226 | 0.479464 | Hlcs     |
| GO_BP_m1GO:00713&cellular res  | 1/2606 | 1/23843 | 0.109298 | 0.504226 | 0.479464 | Npas4    |
| GO_BP_m1GO:007144cellular res  | 1/2606 | 1/23843 | 0.109298 | 0.504226 | 0.479464 | Gng8     |
| GO_BP_m1GO:007144cellular res  | 1/2606 | 1/23843 | 0.109298 | 0.504226 | 0.479464 | Mgst1    |
| GO_BP_m1GO:007147cellular res  | 1/2606 | 1/23843 | 0.109298 | 0.504226 | 0.479464 | Ptgs2    |
| GO_BP_m1GO:00716C phytosphin   | 1/2606 | 1/23843 | 0.109298 | 0.504226 | 0.479464 | Acer3    |
| GO_BP_m1GO:00719&maintenan     | 1/2606 | 1/23843 | 0.109298 | 0.504226 | 0.479464 | Naa10    |
| GO_BP_m1GO:00719&establishm    | 1/2606 | 1/23843 | 0.109298 | 0.504226 | 0.479464 | Cfl1     |
| GO_BP_m1GO:007202macula der    | 1/2606 | 1/23843 | 0.109298 | 0.504226 | 0.479464 | Pou3f3   |
| GO_BP_m1GO:00720&mesenchyr     | 1/2606 | 1/23843 | 0.109298 | 0.504226 | 0.479464 | Smo      |
| GO_BP_m1GO:00721&anterior m    | 1/2606 | 1/23843 | 0.109298 | 0.504226 | 0.479464 | Osr1     |
| GO_BP_m1GO:00721&specificatio  | 1/2606 | 1/23843 | 0.109298 | 0.504226 | 0.479464 | Osr1     |
| GO_BP_m1GO:00721&specificatio  | 1/2606 | 1/23843 | 0.109298 | 0.504226 | 0.479464 | Osr1     |
| GO_BP_m1GO:00721&specificatio  | 1/2606 | 1/23843 | 0.109298 | 0.504226 | 0.479464 | Osr1     |
| GO_BP_m1GO:00721&negative re   | 1/2606 | 1/23843 | 0.109298 | 0.504226 | 0.479464 | Osr1     |
| GO_BP_m1GO:00721&renal vesicl  | 1/2606 | 1/23843 | 0.109298 | 0.504226 | 0.479464 | Osr1     |
| GO_BP_m1GO:00722C metaneph     | 1/2606 | 1/23843 | 0.109298 | 0.504226 | 0.479464 | Pou3f3   |
| GO_BP_m1GO:00722C metaneph     | 1/2606 | 1/23843 | 0.109298 | 0.504226 | 0.479464 | Osr1     |
| GO_BP_m1GO:007222 metaneph     | 1/2606 | 1/23843 | 0.109298 | 0.504226 | 0.479464 | Pou3f3   |
| GO_BP_m1GO:00722&metaneph      | 1/2606 | 1/23843 | 0.109298 | 0.504226 | 0.479464 | Osr1     |
| GO_BP_m1GO:00722&metaneph      | 1/2606 | 1/23843 | 0.109298 | 0.504226 | 0.479464 | Osr1     |
| GO_BP_m1GO:007227 metaneph     | 1/2606 | 1/23843 | 0.109298 | 0.504226 | 0.479464 | Lamb2    |
| GO_BP_m1GO:00722&mesenchyr     | 1/2606 | 1/23843 | 0.109298 | 0.504226 | 0.479464 | Smo      |
| GO_BP_m1GO:00722&negative re   | 1/2606 | 1/23843 | 0.109298 | 0.504226 | 0.479464 | Wt1      |
| GO_BP_m1GO:00723C negative re  | 1/2606 | 1/23843 | 0.109298 | 0.504226 | 0.479464 | Wt1      |
| GO_BP_m1GO:007257 glycine rec  | 1/2606 | 1/23843 | 0.109298 | 0.504226 | 0.479464 | Gphn     |
| GO_BP_m1GO:00726&extracellula  | 1/2606 | 1/23843 | 0.109298 | 0.504226 | 0.479464 | Adam8    |
| GO_BP_m1GO:00726&fibronectin   | 1/2606 | 1/23843 | 0.109298 | 0.504226 | 0.479464 | Adam8    |
| GO_BP_m1GO:00727C cellular res | 1/2606 | 1/23843 | 0.109298 | 0.504226 | 0.479464 | Mapk13   |
| GO_BP_m1GO:007274cellular res  | 1/2606 | 1/23843 | 0.109298 | 0.504226 | 0.479464 | Mapk13   |
| GO_BP_m1GO:00861C endothelin   | 1/2606 | 1/23843 | 0.109298 | 0.504226 | 0.479464 | Ednrb    |
| GO_BP_m1GO:009004positive re   | 1/2606 | 1/23843 | 0.109298 | 0.504226 | 0.479464 | Fnta     |
| GO_BP_m1GO:00900&regulation    | 1/2606 | 1/23843 | 0.109298 | 0.504226 | 0.479464 | Myc      |
| GO_BP_m1GO:00900&positive re   | 1/2606 | 1/23843 | 0.109298 | 0.504226 | 0.479464 | Myc      |
| GO_BP_m1GO:00901C positive re  | 1/2606 | 1/23843 | 0.109298 | 0.504226 | 0.479464 | Nr1h2    |
| GO_BP_m1GO:009011regulation    | 1/2606 | 1/23843 | 0.109298 | 0.504226 | 0.479464 | Preb     |
| GO_BP_m1GO:009017microtubul    | 1/2606 | 1/23843 | 0.109298 | 0.504226 | 0.479464 | Pafah1b1 |
| GO_BP_m1GO:00902&positive re   | 1/2606 | 1/23843 | 0.109298 | 0.504226 | 0.479464 | Esrrb    |
| GO_BP_m1GO:009034positive re   | 1/2606 | 1/23843 | 0.109298 | 0.504226 | 0.479464 | Nr1h2    |
| GO_BP_m1GO:009034cellular org  | 1/2606 | 1/23843 | 0.109298 | 0.504226 | 0.479464 | Por      |
| GO_BP_m1GO:009034cellular org  | 1/2606 | 1/23843 | 0.109298 | 0.504226 | 0.479464 | Por      |
| GO_BP_m1GO:00903&positive re   | 1/2606 | 1/23843 | 0.109298 | 0.504226 | 0.479464 | Apobec1  |
| GO_BP_m1GO:009061mitochond     | 1/2606 | 1/23843 | 0.109298 | 0.504226 | 0.479464 | Pnpt1    |

|                                                   |        |         |          |          |          |          |
|---------------------------------------------------|--------|---------|----------|----------|----------|----------|
| GO_BP_m1GO:009066cell chemo                       | 1/2606 | 1/23843 | 0.109298 | 0.504226 | 0.479464 | Gab1     |
| GO_BP_m1GO:009066endothelial                      | 1/2606 | 1/23843 | 0.109298 | 0.504226 | 0.479464 | Gab1     |
| GO_BP_m1GO:009067calcium ion                      | 1/2606 | 1/23843 | 0.109298 | 0.504226 | 0.479464 | Wnt3a    |
| GO_BP_m1GO:009705selenocysteine                   | 1/2606 | 1/23843 | 0.109298 | 0.504226 | 0.479464 | Sepsecs  |
| GO_BP_m1GO:009718response to                      | 1/2606 | 1/23843 | 0.109298 | 0.504226 | 0.479464 | Aoc1     |
| GO_BP_m1GO:009718cellular response to             | 1/2606 | 1/23843 | 0.109298 | 0.504226 | 0.479464 | Aoc1     |
| GO_BP_m1GO:009722mitochondrial                    | 1/2606 | 1/23843 | 0.109298 | 0.504226 | 0.479464 | Pnpt1    |
| GO_BP_m1GO:009731cap2 mRNA                        | 1/2606 | 1/23843 | 0.109298 | 0.504226 | 0.479464 | Cmtr2    |
| GO_BP_m1GO:009749blood vessel                     | 1/2606 | 1/23843 | 0.109298 | 0.504226 | 0.479464 | Trpv4    |
| GO_BP_m1GO:009751base-excision                    | 1/2606 | 1/23843 | 0.109298 | 0.504226 | 0.479464 | Ung      |
| GO_BP_m1GO:009873negative regulation of           | 1/2606 | 1/23843 | 0.109298 | 0.504226 | 0.479464 | Atp2b4   |
| GO_BP_m1GO:009876meiotic process                  | 1/2606 | 1/23843 | 0.109298 | 0.504226 | 0.479464 | Ttk      |
| GO_BP_m1GO:009904ceramide transfer                | 1/2606 | 1/23843 | 0.109298 | 0.504226 | 0.479464 | Abcb1a   |
| GO_BP_m1GO:009955trans-synaptic                   | 1/2606 | 1/23843 | 0.109298 | 0.504226 | 0.479464 | Gucy1b1  |
| GO_BP_m1GO:009955trans-synaptic                   | 1/2606 | 1/23843 | 0.109298 | 0.504226 | 0.479464 | Gucy1b1  |
| GO_BP_m1GO:010606regulation of                    | 1/2606 | 1/23843 | 0.109298 | 0.504226 | 0.479464 | Clybl    |
| GO_BP_m1GO:014019negative regulation of           | 1/2606 | 1/23843 | 0.109298 | 0.504226 | 0.479464 | Atp2b4   |
| GO_BP_m1GO:015002oxidized low density lipoprotein | 1/2606 | 1/23843 | 0.109298 | 0.504226 | 0.479464 | Cd36     |
| GO_BP_m1GO:190001regulation of                    | 1/2606 | 1/23843 | 0.109298 | 0.504226 | 0.479464 | Crhbp    |
| GO_BP_m1GO:190001negative regulation of           | 1/2606 | 1/23843 | 0.109298 | 0.504226 | 0.479464 | Crhbp    |
| GO_BP_m1GO:190007regulation of                    | 1/2606 | 1/23843 | 0.109298 | 0.504226 | 0.479464 | Rapsn    |
| GO_BP_m1GO:190007positive regulation of           | 1/2606 | 1/23843 | 0.109298 | 0.504226 | 0.479464 | Rapsn    |
| GO_BP_m1GO:190008regulation of                    | 1/2606 | 1/23843 | 0.109298 | 0.504226 | 0.479464 | Atp2b4   |
| GO_BP_m1GO:190008negative regulation of           | 1/2606 | 1/23843 | 0.109298 | 0.504226 | 0.479464 | Atp2b4   |
| GO_BP_m1GO:190008negative regulation of           | 1/2606 | 1/23843 | 0.109298 | 0.504226 | 0.479464 | Cav1     |
| GO_BP_m1GO:190024negative regulation of           | 1/2606 | 1/23843 | 0.109298 | 0.504226 | 0.479464 | Cpeb3    |
| GO_BP_m1GO:190075doxorubicin                      | 1/2606 | 1/23843 | 0.109298 | 0.504226 | 0.479464 | Ralbp1   |
| GO_BP_m1GO:190082negative regulation of           | 1/2606 | 1/23843 | 0.109298 | 0.504226 | 0.479464 | Cav3     |
| GO_BP_m1GO:19010Cubiquinone                       | 1/2606 | 1/23843 | 0.109298 | 0.504226 | 0.479464 | Ndufa9   |
| GO_BP_m1GO:19010Cubiquinone                       | 1/2606 | 1/23843 | 0.109298 | 0.504226 | 0.479464 | Ndufa9   |
| GO_BP_m1GO:19012Cnegative regulation of           | 1/2606 | 1/23843 | 0.109298 | 0.504226 | 0.479464 | Antxr1   |
| GO_BP_m1GO:19012Epositive regulation of           | 1/2606 | 1/23843 | 0.109298 | 0.504226 | 0.479464 | Fmr1     |
| GO_BP_m1GO:190132negative regulation of           | 1/2606 | 1/23843 | 0.109298 | 0.504226 | 0.479464 | Wnt3a    |
| GO_BP_m1GO:190163positive regulation of           | 1/2606 | 1/23843 | 0.109298 | 0.504226 | 0.479464 | Lrp4     |
| GO_BP_m1GO:19019Cpositive regulation of           | 1/2606 | 1/23843 | 0.109298 | 0.504226 | 0.479464 | Topaz1   |
| GO_BP_m1GO:190203positive regulation of           | 1/2606 | 1/23843 | 0.109298 | 0.504226 | 0.479464 | Foxc1    |
| GO_BP_m1GO:190214regulation of                    | 1/2606 | 1/23843 | 0.109298 | 0.504226 | 0.479464 | Tigar    |
| GO_BP_m1GO:19021Eregulation of                    | 1/2606 | 1/23843 | 0.109298 | 0.504226 | 0.479464 | Tigar    |
| GO_BP_m1GO:19021Eregulation of                    | 1/2606 | 1/23843 | 0.109298 | 0.504226 | 0.479464 | Tigar    |
| GO_BP_m1GO:19026Ccarnitine transport              | 1/2606 | 1/23843 | 0.109298 | 0.504226 | 0.479464 | Slc25a20 |
| GO_BP_m1GO:19030Cprotein localization             | 1/2606 | 1/23843 | 0.109298 | 0.504226 | 0.479464 | Ttk      |
| GO_BP_m1GO:190321glomerular                       | 1/2606 | 1/23843 | 0.109298 | 0.504226 | 0.479464 | Ppargc1a |
| GO_BP_m1GO:190324regulation of                    | 1/2606 | 1/23843 | 0.109298 | 0.504226 | 0.479464 | Atp2b4   |
| GO_BP_m1GO:190324negative regulation of           | 1/2606 | 1/23843 | 0.109298 | 0.504226 | 0.479464 | Atp2b4   |
| GO_BP_m1GO:19032Eregulation of                    | 1/2606 | 1/23843 | 0.109298 | 0.504226 | 0.479464 | Snca     |
| GO_BP_m1GO:19032Epositive regulation of           | 1/2606 | 1/23843 | 0.109298 | 0.504226 | 0.479464 | Snca     |
| GO_BP_m1GO:19032Epositive regulation of           | 1/2606 | 1/23843 | 0.109298 | 0.504226 | 0.479464 | Snca     |
| GO_BP_m1GO:190341iron cation                      | 1/2606 | 1/23843 | 0.109298 | 0.504226 | 0.479464 | Slc40a1  |

|          |           |              |        |         |          |          |          |          |
|----------|-----------|--------------|--------|---------|----------|----------|----------|----------|
| GO_BP_m1 | GO:190342 | protein loc  | 1/2606 | 1/23843 | 0.109298 | 0.504226 | 0.479464 | Gbf1     |
| GO_BP_m1 | GO:190344 | negative re  | 1/2606 | 1/23843 | 0.109298 | 0.504226 | 0.479464 | Trpv4    |
| GO_BP_m1 | GO:190360 | negative re  | 1/2606 | 1/23843 | 0.109298 | 0.504226 | 0.479464 | Cav1     |
| GO_BP_m1 | GO:190375 | signal trans | 1/2606 | 1/23843 | 0.109298 | 0.504226 | 0.479464 | Trpv4    |
| GO_BP_m1 | GO:190390 | regulation   | 1/2606 | 1/23843 | 0.109298 | 0.504226 | 0.479464 | Gsn      |
| GO_BP_m1 | GO:190398 | ferrous iron | 1/2606 | 1/23843 | 0.109298 | 0.504226 | 0.479464 | Slc40a1  |
| GO_BP_m1 | GO:190404 | regulation   | 1/2606 | 1/23843 | 0.109298 | 0.504226 | 0.479464 | Mtrr     |
| GO_BP_m1 | GO:190404 | negative re  | 1/2606 | 1/23843 | 0.109298 | 0.504226 | 0.479464 | Mtrr     |
| GO_BP_m1 | GO:190405 | positive re  | 1/2606 | 1/23843 | 0.109298 | 0.504226 | 0.479464 | Stx1b    |
| GO_BP_m1 | GO:190411 | regulation   | 1/2606 | 1/23843 | 0.109298 | 0.504226 | 0.479464 | Stox1    |
| GO_BP_m1 | GO:190412 | positive re  | 1/2606 | 1/23843 | 0.109298 | 0.504226 | 0.479464 | Stox1    |
| GO_BP_m1 | GO:190444 | regulation   | 1/2606 | 1/23843 | 0.109298 | 0.504226 | 0.479464 | Abat     |
| GO_BP_m1 | GO:190445 | positive re  | 1/2606 | 1/23843 | 0.109298 | 0.504226 | 0.479464 | Abat     |
| GO_BP_m1 | GO:190446 | negative re  | 1/2606 | 1/23843 | 0.109298 | 0.504226 | 0.479464 | Idh2     |
| GO_BP_m1 | GO:190448 | response to  | 1/2606 | 1/23843 | 0.109298 | 0.504226 | 0.479464 | Shmt1    |
| GO_BP_m1 | GO:190448 | cellular res | 1/2606 | 1/23843 | 0.109298 | 0.504226 | 0.479464 | Shmt1    |
| GO_BP_m1 | GO:190462 | response to  | 1/2606 | 1/23843 | 0.109298 | 0.504226 | 0.479464 | Nfkb1    |
| GO_BP_m1 | GO:190463 | cellular res | 1/2606 | 1/23843 | 0.109298 | 0.504226 | 0.479464 | Nfkb1    |
| GO_BP_m1 | GO:190463 | response to  | 1/2606 | 1/23843 | 0.109298 | 0.504226 | 0.479464 | Nfkb1    |
| GO_BP_m1 | GO:190463 | cellular res | 1/2606 | 1/23843 | 0.109298 | 0.504226 | 0.479464 | Nfkb1    |
| GO_BP_m1 | GO:190463 | regulation   | 1/2606 | 1/23843 | 0.109298 | 0.504226 | 0.479464 | Ppargc1a |
| GO_BP_m1 | GO:190463 | positive re  | 1/2606 | 1/23843 | 0.109298 | 0.504226 | 0.479464 | Ppargc1a |
| GO_BP_m1 | GO:190469 | negative re  | 1/2606 | 1/23843 | 0.109298 | 0.504226 | 0.479464 | Wdr13    |
| GO_BP_m1 | GO:190471 | positive re  | 1/2606 | 1/23843 | 0.109298 | 0.504226 | 0.479464 | Ssh1     |
| GO_BP_m1 | GO:190487 | regulation   | 1/2606 | 1/23843 | 0.109298 | 0.504226 | 0.479464 | Xrcc1    |
| GO_BP_m1 | GO:190487 | positive re  | 1/2606 | 1/23843 | 0.109298 | 0.504226 | 0.479464 | Xrcc1    |
| GO_BP_m1 | GO:190497 | negative re  | 1/2606 | 1/23843 | 0.109298 | 0.504226 | 0.479464 | Park2    |
| GO_BP_m1 | GO:190498 | positive re  | 1/2606 | 1/23843 | 0.109298 | 0.504226 | 0.479464 | Synj1    |
| GO_BP_m1 | GO:190523 | cellular res | 1/2606 | 1/23843 | 0.109298 | 0.504226 | 0.479464 | Park2    |
| GO_BP_m1 | GO:190525 | regulation   | 1/2606 | 1/23843 | 0.109298 | 0.504226 | 0.479464 | Nucks1   |
| GO_BP_m1 | GO:190535 | protein loc  | 1/2606 | 1/23843 | 0.109298 | 0.504226 | 0.479464 | Ttk      |
| GO_BP_m1 | GO:190536 | regulation   | 1/2606 | 1/23843 | 0.109298 | 0.504226 | 0.479464 | Park2    |
| GO_BP_m1 | GO:190536 | negative re  | 1/2606 | 1/23843 | 0.109298 | 0.504226 | 0.479464 | Park2    |
| GO_BP_m1 | GO:190558 | positive re  | 1/2606 | 1/23843 | 0.109298 | 0.504226 | 0.479464 | Anxa2    |
| GO_BP_m1 | GO:190559 | negative re  | 1/2606 | 1/23843 | 0.109298 | 0.504226 | 0.479464 | Pcsk9    |
| GO_BP_m1 | GO:190559 | positive re  | 1/2606 | 1/23843 | 0.109298 | 0.504226 | 0.479464 | Anxa2    |
| GO_BP_m1 | GO:190559 | negative re  | 1/2606 | 1/23843 | 0.109298 | 0.504226 | 0.479464 | Pcsk9    |
| GO_BP_m1 | GO:190559 | positive re  | 1/2606 | 1/23843 | 0.109298 | 0.504226 | 0.479464 | Anxa2    |
| GO_BP_m1 | GO:190560 | negative re  | 1/2606 | 1/23843 | 0.109298 | 0.504226 | 0.479464 | Pcsk9    |
| GO_BP_m1 | GO:190563 | positive re  | 1/2606 | 1/23843 | 0.109298 | 0.504226 | 0.479464 | Ddrgk1   |
| GO_BP_m1 | GO:190577 | positive re  | 1/2606 | 1/23843 | 0.109298 | 0.504226 | 0.479464 | Wnt3a    |
| GO_BP_m1 | GO:190587 | positive re  | 1/2606 | 1/23843 | 0.109298 | 0.504226 | 0.479464 | Cfl1     |
| GO_BP_m1 | GO:190587 | negative re  | 1/2606 | 1/23843 | 0.109298 | 0.504226 | 0.479464 | Cfl1     |
| GO_BP_m1 | GO:190590 | positive re  | 1/2606 | 1/23843 | 0.109298 | 0.504226 | 0.479464 | Wnt3a    |
| GO_BP_m1 | GO:199035 | stress resp  | 1/2606 | 1/23843 | 0.109298 | 0.504226 | 0.479464 | Slc30a3  |
| GO_BP_m1 | GO:199064 | response to  | 1/2606 | 1/23843 | 0.109298 | 0.504226 | 0.479464 | Eif2ak1  |
| GO_BP_m1 | GO:199096 | drug trans   | 1/2606 | 1/23843 | 0.109298 | 0.504226 | 0.479464 | Abcb1a   |
| GO_BP_m1 | GO:199096 | establishm   | 1/2606 | 1/23843 | 0.109298 | 0.504226 | 0.479464 | Abcb1a   |

|                                                            |           |          |          |          |             |
|------------------------------------------------------------|-----------|----------|----------|----------|-------------|
| GO_BP_m1GO:199096modulator1/2606                           | 1/23843   | 0.109298 | 0.504226 | 0.479464 | Nucks1      |
| GO_BP_m1GO:199096modulator1/2606                           | 1/23843   | 0.109298 | 0.504226 | 0.479464 | Nucks1      |
| GO_BP_m1GO:200004negative regulation1/2606                 | 1/23843   | 0.109298 | 0.504226 | 0.479464 | Wnt3a       |
| GO_BP_m1GO:200006positive regulation1/2606                 | 1/23843   | 0.109298 | 0.504226 | 0.479464 | Wnt3a       |
| GO_BP_m1GO:200018positive regulation1/2606                 | 1/23843   | 0.109298 | 0.504226 | 0.479464 | Ppargc1a    |
| GO_BP_m1GO:200028negative regulation1/2606                 | 1/23843   | 0.109298 | 0.504226 | 0.479464 | Atp2b4      |
| GO_BP_m1GO:200039regulation1/2606                          | 1/23843   | 0.109298 | 0.504226 | 0.479464 | Adam8       |
| GO_BP_m1GO:200039negative regulation1/2606                 | 1/23843   | 0.109298 | 0.504226 | 0.479464 | Adam8       |
| GO_BP_m1GO:200041regulation1/2606                          | 1/23843   | 0.109298 | 0.504226 | 0.479464 | Adam8       |
| GO_BP_m1GO:200041positive regulation1/2606                 | 1/23843   | 0.109298 | 0.504226 | 0.479464 | Adam8       |
| GO_BP_m1GO:200047positive regulation1/2606                 | 1/23843   | 0.109298 | 0.504226 | 0.479464 | Snca        |
| GO_BP_m1GO:200049regulation1/2606                          | 1/23843   | 0.109298 | 0.504226 | 0.479464 | Ticam2      |
| GO_BP_m1GO:200049positive regulation1/2606                 | 1/23843   | 0.109298 | 0.504226 | 0.479464 | Ticam2      |
| GO_BP_m1GO:200071regulation1/2606                          | 1/23843   | 0.109298 | 0.504226 | 0.479464 | Naa10       |
| GO_BP_m1GO:200071negative regulation1/2606                 | 1/23843   | 0.109298 | 0.504226 | 0.479464 | Naa10       |
| GO_BP_m1GO:200078regulation1/2606                          | 1/23843   | 0.109298 | 0.504226 | 0.479464 | Cfl1        |
| GO_BP_m1GO:200078positive regulation1/2606                 | 1/23843   | 0.109298 | 0.504226 | 0.479464 | Cfl1        |
| GO_BP_m1GO:200084negative regulation1/2606                 | 1/23843   | 0.109298 | 0.504226 | 0.479464 | Igfbp3      |
| GO_BP_m1GO:200097regulation1/2606                          | 1/23843   | 0.109298 | 0.504226 | 0.479464 | Foxa2       |
| GO_BP_m1GO:200097negative regulation1/2606                 | 1/23843   | 0.109298 | 0.504226 | 0.479464 | Foxa2       |
| GO_BP_m1GO:200107regulation1/2606                          | 1/23843   | 0.109298 | 0.504226 | 0.479464 | Wt1         |
| GO_BP_m1GO:200107positive regulation1/2606                 | 1/23843   | 0.109298 | 0.504226 | 0.479464 | Wt1         |
| GO_BP_m1GO:200122negative regulation1/2606                 | 1/23843   | 0.109298 | 0.504226 | 0.479464 | Prkdc       |
| GO_BP_m1GO:20013C lipoxin B4 receptor1/2606                | 1/23843   | 0.109298 | 0.504226 | 0.479464 | Alox12      |
| GO_BP_m1GO:20013C lipoxin B4 receptor1/2606                | 1/23843   | 0.109298 | 0.504226 | 0.479464 | Alox12      |
| GO_BP_m1GO:200131lysobisphospholipase1/2606                | 1/23843   | 0.109298 | 0.504226 | 0.479464 | Acp6        |
| GO_BP_m1GO:000914purine nucleoside biosynthesis19/2606     | 129/23843 | 0.10941  | 0.504226 | 0.479464 | Adk/Atp5a   |
| GO_BP_m1GO:003166response to hypoxia47/2606                | 359/23843 | 0.109736 | 0.504226 | 0.479464 | Aoc1/Arsb,  |
| GO_BP_m1GO:007066positive regulation of cell growth21/2606 | 145/23843 | 0.109847 | 0.504226 | 0.479464 | Adk/Blm/B   |
| GO_BP_m1GO:000694regulation of cell growth11/2606          | 67/23843  | 0.110057 | 0.504226 | 0.479464 | Abat/Adora  |
| GO_BP_m1GO:003304regulation of cell growth11/2606          | 67/23843  | 0.110057 | 0.504226 | 0.479464 | Cdc23/H2a   |
| GO_BP_m1GO:005088neuromuscular junction development11/2606 | 67/23843  | 0.110057 | 0.504226 | 0.479464 | Abl2/Aldh1  |
| GO_BP_m1GO:009719execution of cell cycle11/2606            | 67/23843  | 0.110057 | 0.504226 | 0.479464 | Aifm1/Bok,  |
| GO_BP_m1GO:000211aggressive behavior3/2606                 | 11/23843  | 0.110328 | 0.504226 | 0.479464 | Abl2/Avpr1  |
| GO_BP_m1GO:000665phosphatase activity3/2606                | 11/23843  | 0.110328 | 0.504226 | 0.479464 | Tmem269/    |
| GO_BP_m1GO:001088regulation of cell growth3/2606           | 11/23843  | 0.110328 | 0.504226 | 0.479464 | Cd36/Nr1h   |
| GO_BP_m1GO:001405regulation of cell growth3/2606           | 11/23843  | 0.110328 | 0.504226 | 0.479464 | Abat/Hrh3,  |
| GO_BP_m1GO:003545cellular response to hypoxia3/2606        | 11/23843  | 0.110328 | 0.504226 | 0.479464 | Ifit2/Myc/T |
| GO_BP_m1GO:004348cellular pigmentation3/2606               | 11/23843  | 0.110328 | 0.504226 | 0.479464 | Bloc1s5/Cc  |
| GO_BP_m1GO:004660positive regulation of cell growth3/2606  | 11/23843  | 0.110328 | 0.504226 | 0.479464 | Plk4/Poc1a  |
| GO_BP_m1GO:005158dopamine signaling3/2606                  | 11/23843  | 0.110328 | 0.504226 | 0.479464 | Gdnf/Park2  |
| GO_BP_m1GO:005193catecholamine signaling3/2606             | 11/23843  | 0.110328 | 0.504226 | 0.479464 | Gdnf/Park2  |
| GO_BP_m1GO:006040regulation of cell growth3/2606           | 11/23843  | 0.110328 | 0.504226 | 0.479464 | Ednrb/P2ry  |
| GO_BP_m1GO:006069regulation of cell growth3/2606           | 11/23843  | 0.110328 | 0.504226 | 0.479464 | Cdh1/Fgf7,  |
| GO_BP_m1GO:006108positive regulation of cell growth3/2606  | 11/23843  | 0.110328 | 0.504226 | 0.479464 | Cd36/Gprc   |
| GO_BP_m1GO:007060centromere organization3/2606             | 11/23843  | 0.110328 | 0.504226 | 0.479464 | Naa10/Naa   |
| GO_BP_m1GO:007086positive regulation of cell growth3/2606  | 11/23843  | 0.110328 | 0.504226 | 0.479464 | Bcap31/Sei  |
| GO_BP_m1GO:007093histone H4 acetylation3/2606              | 11/23843  | 0.110328 | 0.504226 | 0.479464 | Hdac1/Hda   |



|                                       |           |          |          |          |            |
|---------------------------------------|-----------|----------|----------|----------|------------|
| GO_BP_m1GO:007129cellular res 3/2606  | 11/23843  | 0.110328 | 0.504226 | 0.479464 | Hvcn1/Mt2  |
| GO_BP_m1GO:007207metanephri3/2606     | 11/23843  | 0.110328 | 0.504226 | 0.479464 | Myc/Osr1/  |
| GO_BP_m1GO:007217mesonephri3/2606     | 11/23843  | 0.110328 | 0.504226 | 0.479464 | Gdnf/Nog/  |
| GO_BP_m1GO:200120regulation 3/2606    | 11/23843  | 0.110328 | 0.504226 | 0.479464 | Cldn18/Fbr |
| GO_BP_m1GO:005084regulation 14/2606   | 90/23843  | 0.110712 | 0.505692 | 0.480859 | Akap6/Asp  |
| GO_BP_m1GO:000916ribonucleo:34/2606   | 251/23843 | 0.110764 | 0.505692 | 0.480859 | Adss/Atp5a |
| GO_BP_m1GO:190161organic hydr29/2606  | 210/23843 | 0.111166 | 0.507262 | 0.482351 | Acer3/Adcy |
| GO_BP_m1GO:000611regulation 8/2606    | 45/23843  | 0.112384 | 0.511227 | 0.486122 | C1qtnf3/Dc |
| GO_BP_m1GO:001922neuronal ar8/2606    | 45/23843  | 0.112384 | 0.511227 | 0.486122 | Fmr1/Gria1 |
| GO_BP_m1GO:004484biological pr8/2606  | 45/23843  | 0.112384 | 0.511227 | 0.486122 | Cdc20/Ctsl |
| GO_BP_m1GO:005079activated T8/2606    | 45/23843  | 0.112384 | 0.511227 | 0.486122 | Arg1/Gpan  |
| GO_BP_m1GO:006100regulation 8/2606    | 45/23843  | 0.112384 | 0.511227 | 0.486122 | Arhgap44/  |
| GO_BP_m1GO:190237negative re8/2606    | 45/23843  | 0.112384 | 0.511227 | 0.486122 | Apobec1/N  |
| GO_BP_m1GO:007022lymphocyte15/2606    | 98/23843  | 0.11248  | 0.511398 | 0.486284 | Adam8/Bln  |
| GO_BP_m1GO:000030response tr27/2606   | 194/23843 | 0.112785 | 0.512523 | 0.487354 | Aptx/Bcar1 |
| GO_BP_m1GO:003464cellular res 12/2606 | 75/23843  | 0.113627 | 0.514787 | 0.489507 | Atr/Cdc25a |
| GO_BP_m1GO:004353blood vess16/2606    | 106/23843 | 0.113788 | 0.514787 | 0.489507 | Adam8/Atf  |
| GO_BP_m1GO:004647glycerophc16/2606    | 106/23843 | 0.113788 | 0.514787 | 0.489507 | Tmem269/   |
| GO_BP_m1GO:199026neutrophil 16/2606   | 106/23843 | 0.113788 | 0.514787 | 0.489507 | Adam8/Ccl  |
| GO_BP_m1GO:000293response tr5/2606    | 24/23843  | 0.113974 | 0.514787 | 0.489507 | Camk2a/Ca  |
| GO_BP_m1GO:003556regulation 5/2606    | 24/23843  | 0.113974 | 0.514787 | 0.489507 | Fbxo18/Hn  |
| GO_BP_m1GO:005189positive re5/2606    | 24/23843  | 0.113974 | 0.514787 | 0.489507 | Cfl1/Enpp2 |
| GO_BP_m1GO:009002regulation 5/2606    | 24/23843  | 0.113974 | 0.514787 | 0.489507 | Ccr1/Cxcl1 |
| GO_BP_m1GO:190198negative re5/2606    | 24/23843  | 0.113974 | 0.514787 | 0.489507 | Hdac1/Hda  |
| GO_BP_m1GO:190301regulation 5/2606    | 24/23843  | 0.113974 | 0.514787 | 0.489507 | Cldn18/Rfl |
| GO_BP_m1GO:190580negative re5/2606    | 24/23843  | 0.113974 | 0.514787 | 0.489507 | Cfl1/Dnm3  |
| GO_BP_m1GO:000760sensory pe 35/2606   | 260/23843 | 0.113987 | 0.514787 | 0.489507 | Atp8b1/Cd  |
| GO_BP_m1GO:000961response tr24/2606   | 170/23843 | 0.114722 | 0.516479 | 0.491115 | Abl2/Ankrc |
| GO_BP_m1GO:000685drug transr10/2606   | 60/23843  | 0.114772 | 0.516479 | 0.491115 | Abcb1a/At  |
| GO_BP_m1GO:004477mitotic DN10/2606    | 60/23843  | 0.114772 | 0.516479 | 0.491115 | Blm/Ccng1  |
| GO_BP_m1GO:000906serine fami7/2606    | 38/23843  | 0.114832 | 0.516479 | 0.491115 | Ahcyl2/Gcl |
| GO_BP_m1GO:003252protein exii7/2606   | 38/23843  | 0.114832 | 0.516479 | 0.491115 | Bcap31/Hs  |
| GO_BP_m1GO:004502plasma me 7/2606     | 38/23843  | 0.114832 | 0.516479 | 0.491115 | Folr2/Mym  |
| GO_BP_m1GO:009712receptor lo 7/2606   | 38/23843  | 0.114832 | 0.516479 | 0.491115 | Arhgap44/  |
| GO_BP_m1GO:009880regulation 7/2606    | 38/23843  | 0.114832 | 0.516479 | 0.491115 | Adora1/Av  |
| GO_BP_m1GO:200124regulation 23/2606   | 162/23843 | 0.115188 | 0.517817 | 0.492388 | Bcap31/Bcl |
| GO_BP_m1GO:000699nucleus or18/2606    | 122/23843 | 0.115332 | 0.517934 | 0.492499 | Ahctf1/Chr |
| GO_BP_m1GO:000958detection c18/2606   | 122/23843 | 0.115332 | 0.517934 | 0.492499 | Adora1/An  |
| GO_BP_m1GO:190198negative re22/2606   | 154/23843 | 0.11554  | 0.51824  | 0.49279  | Blm/Baban  |
| GO_BP_m1GO:001063negative re48/2606   | 369/23843 | 0.115593 | 0.51824  | 0.49279  | Apobec1/E  |
| GO_BP_m1GO:009032regulation 6/2606    | 31/23843  | 0.115789 | 0.51824  | 0.49279  | Cd36/Fbln  |
| GO_BP_m1GO:009853centriole a6/2606    | 31/23843  | 0.115789 | 0.51824  | 0.49279  | Deup1/Cd   |
| GO_BP_m1GO:190102negative re6/2606    | 31/23843  | 0.115789 | 0.51824  | 0.49279  | Adra1d/Fkl |
| GO_BP_m1GO:000722smoothene20/2606     | 138/23843 | 0.115813 | 0.51824  | 0.49279  | Ankmy2/B   |
| GO_BP_m1GO:000729female gan20/2606    | 138/23843 | 0.115813 | 0.51824  | 0.49279  | Adamts1/A  |
| GO_BP_m1GO:000722integrin-m13/2606    | 83/23843  | 0.116347 | 0.519833 | 0.494305 | Bcar1/Cd6  |
| GO_BP_m1GO:000913purine nuc13/2606    | 83/23843  | 0.116347 | 0.519833 | 0.494305 | Bpgm/Eno   |
| GO_BP_m1GO:000917purine ribo13/2606   | 83/23843  | 0.116347 | 0.519833 | 0.494305 | Bpgm/Eno   |

|                                |         |           |          |          |          |             |
|--------------------------------|---------|-----------|----------|----------|----------|-------------|
| GO_BP_m1GO:002153telencepha    | 32/2606 | 236/23843 | 0.117624 | 0.525003 | 0.499221 | Aldh1a3/A   |
| GO_BP_m1GO:005105positive re   | 32/2606 | 236/23843 | 0.117624 | 0.525003 | 0.499221 | Anxa3/Aplf  |
| GO_BP_m1GO:000648protein gly   | 27/2606 | 195/23843 | 0.117941 | 0.525884 | 0.500058 | A4gnt/Alg6  |
| GO_BP_m1GO:004341macromole     | 27/2606 | 195/23843 | 0.117941 | 0.525884 | 0.500058 | A4gnt/Alg6  |
| GO_BP_m1GO:007252pyridine-c    | 14/2606 | 91/23843  | 0.118391 | 0.527624 | 0.501713 | Bpgm/Eno:   |
| GO_BP_m1GO:004358skin develo   | 38/2606 | 286/23843 | 0.118687 | 0.528675 | 0.502712 | Abca12/Ak   |
| GO_BP_m1GO:004424cellular lipi | 26/2606 | 187/23843 | 0.118801 | 0.528915 | 0.502941 | Abcd3/Abf   |
| GO_BP_m1GO:000175neural cres   | 9/2606  | 53/23843  | 0.119396 | 0.530221 | 0.504182 | Cfl1/Ednrb, |
| GO_BP_m1GO:000254monocyte      | 9/2606  | 53/23843  | 0.119396 | 0.530221 | 0.504182 | Ccl20/Ccl2: |
| GO_BP_m1GO:004806developme     | 9/2606  | 53/23843  | 0.119396 | 0.530221 | 0.504182 | Adamts9/B   |
| GO_BP_m1GO:007098demethylat    | 9/2606  | 53/23843  | 0.119396 | 0.530221 | 0.504182 | Apobec1/K   |
| GO_BP_m1GO:190054negative re   | 9/2606  | 53/23843  | 0.119396 | 0.530221 | 0.504182 | Adra1d/Ak   |
| GO_BP_m1GO:002151spinal cord   | 15/2606 | 99/23843  | 0.11989  | 0.531924 | 0.505802 | Dbx1/Dll4/  |
| GO_BP_m1GO:004339regulation    | 30/2606 | 220/23843 | 0.119961 | 0.531924 | 0.505802 | Abl2/Anxa:  |
| GO_BP_m1GO:005067regulation    | 30/2606 | 220/23843 | 0.119961 | 0.531924 | 0.505802 | Adk/Arg1/I  |
| GO_BP_m1GO:000095nuclear-tra   | 16/2606 | 107/23843 | 0.120947 | 0.536021 | 0.509698 | Btg2/Noct/  |
| GO_BP_m1GO:000657cellular mo   | 22/2606 | 155/23843 | 0.121462 | 0.538003 | 0.511583 | Tmem269/    |
| GO_BP_m1GO:007048response tr   | 36/2606 | 270/23843 | 0.121561 | 0.538003 | 0.511583 | Abat/Adar   |
| GO_BP_m1GO:000705mitotic spir  | 17/2606 | 115/23843 | 0.121639 | 0.538003 | 0.511583 | Ankrd53/Bi  |
| GO_BP_m1GO:001402primary ne    | 17/2606 | 115/23843 | 0.121639 | 0.538003 | 0.511583 | Abl2/Adm/   |
| GO_BP_m1GO:000958detection c   | 18/2606 | 123/23843 | 0.12203  | 0.538562 | 0.512115 | Adora1/An   |
| GO_BP_m1GO:00322Ctelomere o    | 18/2606 | 123/23843 | 0.12203  | 0.538562 | 0.512115 | Atr/Blm/Cc  |
| GO_BP_m1GO:004599regulation    | 18/2606 | 123/23843 | 0.12203  | 0.538562 | 0.512115 | Noct/Col5a  |
| GO_BP_m1GO:003294positive re   | 20/2606 | 139/23843 | 0.122101 | 0.538562 | 0.512115 | Adk/Blm/B   |
| GO_BP_m1GO:000667ceramide n    | 12/2606 | 76/23843  | 0.122256 | 0.538562 | 0.512115 | Acer3/Asa   |
| GO_BP_m1GO:000691activation c  | 12/2606 | 76/23843  | 0.122256 | 0.538562 | 0.512115 | Aifm1/Bok,  |
| GO_BP_m1GO:004591positive re   | 12/2606 | 76/23843  | 0.122256 | 0.538562 | 0.512115 | Adcyap1r1.  |
| GO_BP_m1GO:190332negative re   | 12/2606 | 76/23843  | 0.122256 | 0.538562 | 0.512115 | Cav1/Svbp.  |
| GO_BP_m1GO:005095sensory pe    | 38/2606 | 287/23843 | 0.123043 | 0.541759 | 0.515154 | Atp8b1/Cd   |
| GO_BP_m1GO:006056epithelial ti | 48/2606 | 371/23843 | 0.12317  | 0.542045 | 0.515426 | Abl2/Adm/   |
| GO_BP_m1GO:004859oocyte dev    | 8/2606  | 46/23843  | 0.123745 | 0.542726 | 0.516073 | Dmrt1/Wa:   |
| GO_BP_m1GO:009869regulation    | 8/2606  | 46/23843  | 0.123745 | 0.542726 | 0.516073 | Cdh2/Dnm    |
| GO_BP_m1GO:200116regulation    | 8/2606  | 46/23843  | 0.123745 | 0.542726 | 0.516073 | Esrrb/Fln/  |
| GO_BP_m1GO:190353positive re   | 56/2606 | 439/23843 | 0.124031 | 0.542726 | 0.516073 | Abat/Abl2/  |
| GO_BP_m1GO:000725JNK cascad    | 26/2606 | 188/23843 | 0.124246 | 0.542726 | 0.516073 | Cdc42ep5/   |
| GO_BP_m1GO:005067positive re   | 26/2606 | 188/23843 | 0.124246 | 0.542726 | 0.516073 | Arg1/Cav1,  |
| GO_BP_m1GO:003163zymogen a     | 10/2606 | 61/23843  | 0.12459  | 0.542726 | 0.516073 | Asph/Casp   |
| GO_BP_m1GO:001935nicotinami    | 13/2606 | 84/23843  | 0.124641 | 0.542726 | 0.516073 | Bpgm/Eno:   |
| GO_BP_m1GO:190355positive re   | 13/2606 | 84/23843  | 0.124641 | 0.542726 | 0.516073 | Adam8/Ccl   |
| GO_BP_m1GO:003133negative re   | 30/2606 | 221/23843 | 0.124993 | 0.542726 | 0.516073 | Anxa2/Apc   |
| GO_BP_m1GO:005073positive re   | 25/2606 | 180/23843 | 0.125193 | 0.542726 | 0.516073 | Adora1/Cd   |
| GO_BP_m1GO:000271negative re   | 4/2606  | 18/23843  | 0.125861 | 0.542726 | 0.516073 | Arg1/Clec4  |
| GO_BP_m1GO:000655methionin     | 4/2606  | 18/23843  | 0.125861 | 0.542726 | 0.516073 | Ahcyl2/Api  |
| GO_BP_m1GO:001075positive re   | 4/2606  | 18/23843  | 0.125861 | 0.542726 | 0.516073 | Cxcl17/Kar: |
| GO_BP_m1GO:003223regulation    | 4/2606  | 18/23843  | 0.125861 | 0.542726 | 0.516073 | Adora1/Nu   |
| GO_BP_m1GO:003269negative re   | 4/2606  | 18/23843  | 0.125861 | 0.542726 | 0.516073 | Il10/Jak3/M |
| GO_BP_m1GO:003316positive re   | 4/2606  | 18/23843  | 0.125861 | 0.542726 | 0.516073 | Cdk1/Ifng/  |
| GO_BP_m1GO:003411negative re   | 4/2606  | 18/23843  | 0.125861 | 0.542726 | 0.516073 | Abat/Alox1  |

|                   |                      |           |          |          |          |             |
|-------------------|----------------------|-----------|----------|----------|----------|-------------|
| GO_BP_m1GO:003456 | piRNA met 4/2606     | 18/23843  | 0.125861 | 0.542726 | 0.516073 | Btbd18/Dd   |
| GO_BP_m1GO:003603 | CD8-positi 4/2606    | 18/23843  | 0.125861 | 0.542726 | 0.516073 | Gpr18/lfng  |
| GO_BP_m1GO:005196 | negative re 4/2606   | 18/23843  | 0.125861 | 0.542726 | 0.516073 | Adora1/Ad   |
| GO_BP_m1GO:006023 | mesenchyr 4/2606     | 18/23843  | 0.125861 | 0.542726 | 0.516073 | Gdnf/Smo/   |
| GO_BP_m1GO:009018 | negative re 4/2606   | 18/23843  | 0.125861 | 0.542726 | 0.516073 | Flcn/lfng/C |
| GO_BP_m1GO:000283 | negative re 7/2606   | 39/23843  | 0.127497 | 0.542726 | 0.516073 | Cactin/Dhx  |
| GO_BP_m1GO:003157 | G2 DNA d 7/2606      | 39/23843  | 0.127497 | 0.542726 | 0.516073 | Blm/Baban   |
| GO_BP_m1GO:003287 | negative re 7/2606   | 39/23843  | 0.127497 | 0.542726 | 0.516073 | Dusp3/Ezr/  |
| GO_BP_m1GO:003317 | calcineurin 7/2606   | 39/23843  | 0.127497 | 0.542726 | 0.516073 | Akap6/Atp   |
| GO_BP_m1GO:004824 | macrophag 7/2606     | 39/23843  | 0.127497 | 0.542726 | 0.516073 | Cklf/Cxcl17 |
| GO_BP_m1GO:006032 | face morp 7/2606     | 39/23843  | 0.127497 | 0.542726 | 0.516073 | Asph/Crisp  |
| GO_BP_m1GO:007030 | negative re 7/2606   | 39/23843  | 0.127497 | 0.542726 | 0.516073 | Dusp3/Ezr/  |
| GO_BP_m1GO:190293 | regulation 7/2606    | 39/23843  | 0.127497 | 0.542726 | 0.516073 | Adcyap1r1   |
| GO_BP_m1GO:005123 | establishm 22/2606   | 156/23843 | 0.127564 | 0.542726 | 0.516073 | Ahctf1/Atr/ |
| GO_BP_m1GO:005198 | regulation 15/2606   | 100/23843 | 0.12758  | 0.542726 | 0.516073 | Cdc23/Fen   |
| GO_BP_m1GO:000184 | neural tub 16/2606   | 108/23843 | 0.128364 | 0.542726 | 0.516073 | Abl2/Adm/   |
| GO_BP_m1GO:004440 | symbiont p 45/2606   | 347/23843 | 0.128393 | 0.542726 | 0.516073 | Anxa2/Arg   |
| GO_BP_m1GO:005072 | negative re 20/2606  | 140/23843 | 0.128591 | 0.542726 | 0.516073 | Adora1/Ao   |
| GO_BP_m1GO:007200 | nephron d 20/2606    | 140/23843 | 0.128591 | 0.542726 | 0.516073 | Basp1/Fgf1  |
| GO_BP_m1GO:000827 | regulation 17/2606   | 116/23843 | 0.128801 | 0.542726 | 0.516073 | Acpp/Adm    |
| GO_BP_m1GO:001802 | peptidyl-ly 17/2606  | 116/23843 | 0.128801 | 0.542726 | 0.516073 | Ash2l/Dmr   |
| GO_BP_m1GO:004483 | cell cycle G 18/2606 | 124/23843 | 0.128954 | 0.542726 | 0.516073 | Abcb1a/Blr  |
| GO_BP_m1GO:009028 | regulation 34/2606   | 255/23843 | 0.129227 | 0.542726 | 0.516073 | Adgra2/Ca   |
| GO_BP_m1GO:000716 | cell-matrix 26/2606  | 189/23843 | 0.129841 | 0.542726 | 0.516073 | Adam8/Ad    |
| GO_BP_m1GO:000244 | neutrophil 6/2606    | 32/23843  | 0.130072 | 0.542726 | 0.516073 | Anxa3/Arg   |
| GO_BP_m1GO:000301 | respiratory 6/2606   | 32/23843  | 0.130072 | 0.542726 | 0.516073 | Adh5/Ador   |
| GO_BP_m1GO:000703 | peroxisom 6/2606     | 32/23843  | 0.130072 | 0.542726 | 0.516073 | Abcd3/Lon   |
| GO_BP_m1GO:003359 | mammary 6/2606       | 32/23843  | 0.130072 | 0.542726 | 0.516073 | Epha2/Gpx   |
| GO_BP_m1GO:006029 | long term 6/2606     | 32/23843  | 0.130072 | 0.542726 | 0.516073 | Adora1/Dri  |
| GO_BP_m1GO:007089 | DNA-temp 6/2606      | 32/23843  | 0.130072 | 0.542726 | 0.516073 | Cand1/Gtf2  |
| GO_BP_m1GO:004593 | negative re 30/2606  | 222/23843 | 0.130153 | 0.542726 | 0.516073 | Blm/Btg2/C  |
| GO_BP_m1GO:000758 | respiratory 9/2606   | 54/23843  | 0.130183 | 0.542726 | 0.516073 | Adh5/Ador   |
| GO_BP_m1GO:004598 | negative re 9/2606   | 54/23843  | 0.130183 | 0.542726 | 0.516073 | Adra1d/Ak   |
| GO_BP_m1GO:000030 | response tr 5/2606   | 25/23843  | 0.130342 | 0.542726 | 0.516073 | Cd36/Fbln5  |
| GO_BP_m1GO:000151 | prostaglan 5/2606    | 25/23843  | 0.130342 | 0.542726 | 0.516073 | Avpr1a/Mc   |
| GO_BP_m1GO:003210 | regulation 5/2606    | 25/23843  | 0.130342 | 0.542726 | 0.516073 | Bbs2/Cartp  |
| GO_BP_m1GO:003210 | regulation 5/2606    | 25/23843  | 0.130342 | 0.542726 | 0.516073 | Bbs2/Cartp  |
| GO_BP_m1GO:003280 | receptor c 5/2606    | 25/23843  | 0.130342 | 0.542726 | 0.516073 | Anxa2/Cdk   |
| GO_BP_m1GO:004645 | prostanoid 5/2606    | 25/23843  | 0.130342 | 0.542726 | 0.516073 | Avpr1a/Mc   |
| GO_BP_m1GO:004871 | positive re 5/2606   | 25/23843  | 0.130342 | 0.542726 | 0.516073 | Enpp2/Hd 2  |
| GO_BP_m1GO:007142 | hematopoi 5/2606     | 25/23843  | 0.130342 | 0.542726 | 0.516073 | Arih2/Eif2a |
| GO_BP_m1GO:007180 | podosome 5/2606      | 25/23843  | 0.130342 | 0.542726 | 0.516073 | Dbnl/Fscn1  |
| GO_BP_m1GO:000001 | regulation 12/2606   | 77/23843  | 0.131244 | 0.542726 | 0.516073 | Aplf/Blm/F  |
| GO_BP_m1GO:005072 | regulation 41/2606   | 314/23843 | 0.131267 | 0.542726 | 0.516073 | Adam8/Ad    |
| GO_BP_m1GO:003424 | regulation 56/2606   | 441/23843 | 0.131294 | 0.542726 | 0.516073 | Bpgm/Btg2   |
| GO_BP_m1GO:006135 | neural prec 24/2606  | 173/23843 | 0.131991 | 0.542726 | 0.516073 | Arx/Btg2/C  |
| GO_BP_m1GO:004225 | ribosome k 38/2606   | 289/23843 | 0.132053 | 0.542726 | 0.516073 | Bms1/Ddx2   |
| GO_BP_m1GO:000631 | DNA recon 32/2606    | 239/23843 | 0.13234  | 0.542726 | 0.516073 | Aplf/Blm/C  |

|          |           |              |         |           |          |          |          |             |
|----------|-----------|--------------|---------|-----------|----------|----------|----------|-------------|
| GO_BP_m1 | GO:004687 | hormone s    | 45/2606 | 348/23843 | 0.132549 | 0.542726 | 0.516073 | Abat/Adm    |
| GO_BP_m1 | GO:000082 | regulation   | 2/2606  | 6/23843   | 0.133001 | 0.542726 | 0.516073 | Atp2b4/Slc  |
| GO_BP_m1 | GO:000091 | assembly     | o2/2606 | 6/23843   | 0.133001 | 0.542726 | 0.516073 | Kif23/Racg  |
| GO_BP_m1 | GO:000091 | actomyosin   | 2/2606  | 6/23843   | 0.133001 | 0.542726 | 0.516073 | Kif23/Racg  |
| GO_BP_m1 | GO:000282 | negative re  | 2/2606  | 6/23843   | 0.133001 | 0.542726 | 0.516073 | Il1rl1/Jak3 |
| GO_BP_m1 | GO:000606 | ethanol me   | 2/2606  | 6/23843   | 0.133001 | 0.542726 | 0.516073 | Adh1/Adhf   |
| GO_BP_m1 | GO:000610 | isocitrate n | 2/2606  | 6/23843   | 0.133001 | 0.542726 | 0.516073 | Idh2/Idh3a  |
| GO_BP_m1 | GO:000677 | Mo-molyb     | 2/2606  | 6/23843   | 0.133001 | 0.542726 | 0.516073 | Gphn/Moc    |
| GO_BP_m1 | GO:001027 | detoxificati | 2/2606  | 6/23843   | 0.133001 | 0.542726 | 0.516073 | Mt2/Mt3     |
| GO_BP_m1 | GO:001036 | negative re  | 2/2606  | 6/23843   | 0.133001 | 0.542726 | 0.516073 | Prkca/Tcaf3 |
| GO_BP_m1 | GO:001058 | miRNA cati   | 2/2606  | 6/23843   | 0.133001 | 0.542726 | 0.516073 | Pnpt1/Zc3f  |
| GO_BP_m1 | GO:001094 | positive re  | 2/2606  | 6/23843   | 0.133001 | 0.542726 | 0.516073 | Bnip3/Ripk  |
| GO_BP_m1 | GO:001405 | acetylcholin | 2/2606  | 6/23843   | 0.133001 | 0.542726 | 0.516073 | Htr6/Tacr2  |
| GO_BP_m1 | GO:001405 | regulation   | 2/2606  | 6/23843   | 0.133001 | 0.542726 | 0.516073 | Htr6/Tacr2  |
| GO_BP_m1 | GO:001471 | skeletal m   | 2/2606  | 6/23843   | 0.133001 | 0.542726 | 0.516073 | Ephb1/Wnr   |
| GO_BP_m1 | GO:001969 | choline me   | 2/2606  | 6/23843   | 0.133001 | 0.542726 | 0.516073 | Ache/Bche   |
| GO_BP_m1 | GO:001972 | Mo-molyb     | 2/2606  | 6/23843   | 0.133001 | 0.542726 | 0.516073 | Gphn/Moc    |
| GO_BP_m1 | GO:002163 | optic nerve  | 2/2606  | 6/23843   | 0.133001 | 0.542726 | 0.516073 | Ephb1/Kcn   |
| GO_BP_m1 | GO:002186 | forebrain v  | 2/2606  | 6/23843   | 0.133001 | 0.542726 | 0.516073 | Dct/Pou3f3  |
| GO_BP_m1 | GO:003017 | regulation   | 2/2606  | 6/23843   | 0.133001 | 0.542726 | 0.516073 | Cdk2/Ciz1   |
| GO_BP_m1 | GO:003088 | regulation   | 2/2606  | 6/23843   | 0.133001 | 0.542726 | 0.516073 | Il10/Tspan3 |
| GO_BP_m1 | GO:003133 | negative re  | 2/2606  | 6/23843   | 0.133001 | 0.542726 | 0.516073 | Tbc1d4/Tri  |
| GO_BP_m1 | GO:003133 | positive re  | 2/2606  | 6/23843   | 0.133001 | 0.542726 | 0.516073 | Avpr1a/Ptc  |
| GO_BP_m1 | GO:003191 | negative re  | 2/2606  | 6/23843   | 0.133001 | 0.542726 | 0.516073 | Cdk5/Rgs1   |
| GO_BP_m1 | GO:003321 | adiponectin  | 2/2606  | 6/23843   | 0.133001 | 0.542726 | 0.516073 | Acsl1/Adip  |
| GO_BP_m1 | GO:003463 | phosphatic   | 2/2606  | 6/23843   | 0.133001 | 0.542726 | 0.516073 | Enpp2/Sca   |
| GO_BP_m1 | GO:003540 | histone-thi  | 2/2606  | 6/23843   | 0.133001 | 0.542726 | 0.516073 | Pkn1/Prkca  |
| GO_BP_m1 | GO:003563 | maintenan    | 2/2606  | 6/23843   | 0.133001 | 0.542726 | 0.516073 | Abcb1a/Ptc  |
| GO_BP_m1 | GO:003598 | tendon dev   | 2/2606  | 6/23843   | 0.133001 | 0.542726 | 0.516073 | Col5a1/Mk   |
| GO_BP_m1 | GO:003800 | paracrine s  | 2/2606  | 6/23843   | 0.133001 | 0.542726 | 0.516073 | Mb21d1/Ti   |
| GO_BP_m1 | GO:004453 | long-chain   | 2/2606  | 6/23843   | 0.133001 | 0.542726 | 0.516073 | Acsl1/Cd3f  |
| GO_BP_m1 | GO:004478 | modulator    | 2/2606  | 6/23843   | 0.133001 | 0.542726 | 0.516073 | Pcx/Vapb    |
| GO_BP_m1 | GO:004478 | positive re  | 2/2606  | 6/23843   | 0.133001 | 0.542726 | 0.516073 | Pcx/Vapb    |
| GO_BP_m1 | GO:004483 | actomyosin   | 2/2606  | 6/23843   | 0.133001 | 0.542726 | 0.516073 | Kif23/Racg  |
| GO_BP_m1 | GO:004558 | positive re  | 2/2606  | 6/23843   | 0.133001 | 0.542726 | 0.516073 | Nckap1l/Pt  |
| GO_BP_m1 | GO:004664 | positive re  | 2/2606  | 6/23843   | 0.133001 | 0.542726 | 0.516073 | Nckap1l/Pt  |
| GO_BP_m1 | GO:004665 | folic acid r | 2/2606  | 6/23843   | 0.133001 | 0.542726 | 0.516073 | Mtrr/Shmt1  |
| GO_BP_m1 | GO:004679 | transport    | o2/2606 | 6/23843   | 0.133001 | 0.542726 | 0.516073 | Cav1/Fmr1   |
| GO_BP_m1 | GO:004886 | stem cell f  | 2/2606  | 6/23843   | 0.133001 | 0.542726 | 0.516073 | Ntf5/Sox18  |
| GO_BP_m1 | GO:005141 | microtubul   | 2/2606  | 6/23843   | 0.133001 | 0.542726 | 0.516073 | Tubgcp2/T   |
| GO_BP_m1 | GO:005157 | negative re  | 2/2606  | 6/23843   | 0.133001 | 0.542726 | 0.516073 | H2afy/Prm   |
| GO_BP_m1 | GO:005158 | negative re  | 2/2606  | 6/23843   | 0.133001 | 0.542726 | 0.516073 | Arl6ip5/Snc |
| GO_BP_m1 | GO:005158 | regulation   | 2/2606  | 6/23843   | 0.133001 | 0.542726 | 0.516073 | Gdnf/Snca   |
| GO_BP_m1 | GO:005194 | regulation   | 2/2606  | 6/23843   | 0.133001 | 0.542726 | 0.516073 | Gdnf/Snca   |
| GO_BP_m1 | GO:005505 | asymmetric   | 2/2606  | 6/23843   | 0.133001 | 0.542726 | 0.516073 | Dock7/Fgf   |
| GO_BP_m1 | GO:006043 | lung growt   | 2/2606  | 6/23843   | 0.133001 | 0.542726 | 0.516073 | Fgf7/Pdgfr  |
| GO_BP_m1 | GO:006072 | intestinal e | 2/2606  | 6/23843   | 0.133001 | 0.542726 | 0.516073 | 5730559C1   |
| GO_BP_m1 | GO:006090 | positive re  | 2/2606  | 6/23843   | 0.133001 | 0.542726 | 0.516073 | Dmrt1/Fbx   |

|                                        |           |          |          |          |             |
|----------------------------------------|-----------|----------|----------|----------|-------------|
| GO_BP_m1GO:006111fungiform i2/2606     | 6/23843   | 0.133001 | 0.542726 | 0.516073 | Hdac1/Hda   |
| GO_BP_m1GO:006166spontaneo12/2606      | 6/23843   | 0.133001 | 0.542726 | 0.516073 | Park2/Stx1l |
| GO_BP_m1GO:007016adiponectin2/2606     | 6/23843   | 0.133001 | 0.542726 | 0.516073 | C1qtnf3/Hc  |
| GO_BP_m1GO:007016regulation 2/2606     | 6/23843   | 0.133001 | 0.542726 | 0.516073 | C1qtnf3/Hc  |
| GO_BP_m1GO:007166protein loc 2/2606    | 6/23843   | 0.133001 | 0.542726 | 0.516073 | Dand5/Fbr   |
| GO_BP_m1GO:007192cohesin loc 2/2606    | 6/23843   | 0.133001 | 0.542726 | 0.516073 | Hdac8/Waj   |
| GO_BP_m1GO:007236response tr2/2606     | 6/23843   | 0.133001 | 0.542726 | 0.516073 | Fbxo18/Tig  |
| GO_BP_m1GO:007240response tr2/2606     | 6/23843   | 0.133001 | 0.542726 | 0.516073 | Fbxo18/Tig  |
| GO_BP_m1GO:007242response tr2/2606     | 6/23843   | 0.133001 | 0.542726 | 0.516073 | Fbxo18/Tig  |
| GO_BP_m1GO:007248ammonium 2/2606       | 6/23843   | 0.133001 | 0.542726 | 0.516073 | Rhd/Slc25a  |
| GO_BP_m1GO:007267osteoclast 2/2606     | 6/23843   | 0.133001 | 0.542726 | 0.516073 | Adam8/Shc   |
| GO_BP_m1GO:007267thymocyte 2/2606      | 6/23843   | 0.133001 | 0.542726 | 0.516073 | Adam8/Ccl   |
| GO_BP_m1GO:009025negative re2/2606     | 6/23843   | 0.133001 | 0.542726 | 0.516073 | Park2/Ppar  |
| GO_BP_m1GO:009031negative re2/2606     | 6/23843   | 0.133001 | 0.542726 | 0.516073 | Itgb1bp1/C  |
| GO_BP_m1GO:009764amylin recep2/2606    | 6/23843   | 0.133001 | 0.542726 | 0.516073 | Adm/Calcr   |
| GO_BP_m1GO:190207cellular res12/2606   | 6/23843   | 0.133001 | 0.542726 | 0.516073 | Mapk13/Zc   |
| GO_BP_m1GO:190396response tr2/2606     | 6/23843   | 0.133001 | 0.542726 | 0.516073 | Mapk13/Zc   |
| GO_BP_m1GO:190426pericyte ce 2/2606    | 6/23843   | 0.133001 | 0.542726 | 0.516073 | Epha2/Osr   |
| GO_BP_m1GO:190477positive re2/2606     | 6/23843   | 0.133001 | 0.542726 | 0.516073 | Epb41/Gna   |
| GO_BP_m1GO:190566regulation 2/2606     | 6/23843   | 0.133001 | 0.542726 | 0.516073 | Hdac8/Waj   |
| GO_BP_m1GO:199016stress resp2/2606     | 6/23843   | 0.133001 | 0.542726 | 0.516073 | Mt2/Mt3     |
| GO_BP_m1GO:199041replication 2/2606    | 6/23843   | 0.133001 | 0.542726 | 0.516073 | Blm/Xrcc1   |
| GO_BP_m1GO:200007regulation 2/2606     | 6/23843   | 0.133001 | 0.542726 | 0.516073 | Arntl/Clock |
| GO_BP_m1GO:200032negative re2/2606     | 6/23843   | 0.133001 | 0.542726 | 0.516073 | Arntl/Clock |
| GO_BP_m1GO:200036positive re2/2606     | 6/23843   | 0.133001 | 0.542726 | 0.516073 | Enpp2/Rrel  |
| GO_BP_m1GO:200046positive re2/2606     | 6/23843   | 0.133001 | 0.542726 | 0.516073 | Acta2/Dga   |
| GO_BP_m1GO:200067positive re2/2606     | 6/23843   | 0.133001 | 0.542726 | 0.516073 | Hdac1/Spc   |
| GO_BP_m1GO:200080positive re2/2606     | 6/23843   | 0.133001 | 0.542726 | 0.516073 | Cdh2/Nlgn   |
| GO_BP_m1GO:200101positive re2/2606     | 6/23843   | 0.133001 | 0.542726 | 0.516073 | Arntl/Tbx1  |
| GO_BP_m1GO:200116positive re2/2606     | 6/23843   | 0.133001 | 0.542726 | 0.516073 | Nckap1l/Pt  |
| GO_BP_m1GO:200126positive re2/2606     | 6/23843   | 0.133001 | 0.542726 | 0.516073 | Avpr1a/Ptc  |
| GO_BP_m1GO:001403neural cres 13/2606   | 85/23843  | 0.133261 | 0.542726 | 0.516073 | Cfl1/Ednrb  |
| GO_BP_m1GO:001607synaptic ve 13/2606   | 85/23843  | 0.133261 | 0.542726 | 0.516073 | Fmr1/Rab5   |
| GO_BP_m1GO:200102positive re13/2606    | 85/23843  | 0.133261 | 0.542726 | 0.516073 | Ankrd1/Atr  |
| GO_BP_m1GO:000854epidermis 42/2606     | 323/23843 | 0.133841 | 0.542726 | 0.516073 | Abca12/Ce   |
| GO_BP_m1GO:005077negative re22/2606    | 157/23843 | 0.133847 | 0.542726 | 0.516073 | Arg1/Bcr/C  |
| GO_BP_m1GO:190496positive re60/2606    | 476/23843 | 0.13445  | 0.542726 | 0.516073 | Abat/Abi2/  |
| GO_BP_m1GO:000224hematopoi 21/2606     | 149/23843 | 0.134626 | 0.542726 | 0.516073 | Acp6/Arhg   |
| GO_BP_m1GO:000157vasculogen 14/2606    | 93/23843  | 0.134652 | 0.542726 | 0.516073 | Adm/Cav1    |
| GO_BP_m1GO:003475cellular hor 14/2606  | 93/23843  | 0.134652 | 0.542726 | 0.516073 | Adh1/Adm    |
| GO_BP_m1GO:001087lipid localiz 46/2606 | 357/23843 | 0.134847 | 0.542726 | 0.516073 | Abca12/Ab   |
| GO_BP_m1GO:001591phospholip 10/2606    | 62/23843  | 0.134849 | 0.542726 | 0.516073 | Abca12/Ab   |
| GO_BP_m1GO:005192negative re 10/2606   | 62/23843  | 0.134849 | 0.542726 | 0.516073 | Adra1d/Ca   |
| GO_BP_m1GO:003461cellular res120/2606  | 141/23843 | 0.135279 | 0.542726 | 0.516073 | Bcar1/Bnip  |
| GO_BP_m1GO:004273drug catab 20/2606    | 141/23843 | 0.135279 | 0.542726 | 0.516073 | Ache/Adh1   |
| GO_BP_m1GO:007207kidney epit 20/2606   | 141/23843 | 0.135279 | 0.542726 | 0.516073 | Basp1/Eph   |
| GO_BP_m1GO:000602aminoglyc 15/2606     | 101/23843 | 0.135545 | 0.542726 | 0.516073 | B3gnt3/B3g  |
| GO_BP_m1GO:003153actin cytosl 15/2606  | 101/23843 | 0.135545 | 0.542726 | 0.516073 | Antxr1/Arh  |

|                                       |           |          |          |          |              |
|---------------------------------------|-----------|----------|----------|----------|--------------|
| GO_BP_m1GO:006041heart grow 15/2606   | 101/23843 | 0.135545 | 0.542726 | 0.516073 | Akap6/Cav    |
| GO_BP_m1GO:004484cell cycle G26/2606  | 190/23843 | 0.135585 | 0.542726 | 0.516073 | Atp2b4/Ca    |
| GO_BP_m1GO:00017εneutrophil 3/2606    | 12/23843  | 0.135665 | 0.542726 | 0.516073 | Hcar2/Ifng,  |
| GO_BP_m1GO:000197adenosine 3/2606     | 12/23843  | 0.135665 | 0.542726 | 0.516073 | Acpp/Ador    |
| GO_BP_m1GO:000657tyrosine mε3/2606    | 12/23843  | 0.135665 | 0.542726 | 0.516073 | Dct/Hpdl/T   |
| GO_BP_m1GO:000667sphingosin 3/2606    | 12/23843  | 0.135665 | 0.542726 | 0.516073 | Acer3/Asaf   |
| GO_BP_m1GO:00094εcarnitine m3/2606    | 12/23843  | 0.135665 | 0.542726 | 0.516073 | Aldh9a1/Ci   |
| GO_BP_m1GO:00157εnucleotide 3/2606    | 12/23843  | 0.135665 | 0.542726 | 0.516073 | Slc35a5/Slc  |
| GO_BP_m1GO:00165εprotein imε3/2606    | 12/23843  | 0.135665 | 0.542726 | 0.516073 | Pex10/Pex.   |
| GO_BP_m1GO:003114anaphase- 3/2606     | 12/23843  | 0.135665 | 0.542726 | 0.516073 | 1500015O.    |
| GO_BP_m1GO:00327εlow-densitε3/2606    | 12/23843  | 0.135665 | 0.542726 | 0.516073 | Anxa2/Pcsl   |
| GO_BP_m1GO:003292negative re3/2606    | 12/23843  | 0.135665 | 0.542726 | 0.516073 | Dand5/Len    |
| GO_BP_m1GO:00332εresponse tr3/2606    | 12/23843  | 0.135665 | 0.542726 | 0.516073 | Cyp24a1/K    |
| GO_BP_m1GO:00340εmaintenanε3/2606     | 12/23843  | 0.135665 | 0.542726 | 0.516073 | H2afy/Naa    |
| GO_BP_m1GO:00341εtoll-like rec3/2606  | 12/23843  | 0.135665 | 0.542726 | 0.516073 | Ptpn22/Tni   |
| GO_BP_m1GO:00343εpositive reε3/2606   | 12/23843  | 0.135665 | 0.542726 | 0.516073 | E2f3/Ifng/Ii |
| GO_BP_m1GO:00349εhistone arc3/2606    | 12/23843  | 0.135665 | 0.542726 | 0.516073 | Prmt1/Prm    |
| GO_BP_m1GO:00423εfat-soluble 3/2606   | 12/23843  | 0.135665 | 0.542726 | 0.516073 | Ifng/Nfkb1   |
| GO_BP_m1GO:00428εantibiotic tr3/2606  | 12/23843  | 0.135665 | 0.542726 | 0.516073 | Abcb1a/Ra    |
| GO_BP_m1GO:004331neutrophil 3/2606    | 12/23843  | 0.135665 | 0.542726 | 0.516073 | Anxa3/Bcr/   |
| GO_BP_m1GO:004337CD8-positi3/2606     | 12/23843  | 0.135665 | 0.542726 | 0.516073 | Gpr18/Ifng   |
| GO_BP_m1GO:004814astrocyte a 3/2606   | 12/23843  | 0.135665 | 0.542726 | 0.516073 | Fpr2/Smo/    |
| GO_BP_m1GO:00514εmyoblast n3/2606     | 12/23843  | 0.135665 | 0.542726 | 0.516073 | Itgb1bp1/It  |
| GO_BP_m1GO:00605εmulticellulε3/2606   | 12/23843  | 0.135665 | 0.542726 | 0.516073 | Hyal2/Rhd,   |
| GO_BP_m1GO:007034fat cell prol3/2606  | 12/23843  | 0.135665 | 0.542726 | 0.516073 | E2f1/E2f3/f  |
| GO_BP_m1GO:007034regulation 3/2606    | 12/23843  | 0.135665 | 0.542726 | 0.516073 | E2f1/E2f3/f  |
| GO_BP_m1GO:007042nucleotide 3/2606    | 12/23843  | 0.135665 | 0.542726 | 0.516073 | 5730559C1    |
| GO_BP_m1GO:00704εnucleotide 3/2606    | 12/23843  | 0.135665 | 0.542726 | 0.516073 | 5730559C1    |
| GO_BP_m1GO:00709εhistone H3 3/2606    | 12/23843  | 0.135665 | 0.542726 | 0.516073 | Elk4/Hdac1   |
| GO_BP_m1GO:007124cellular resε3/2606  | 12/23843  | 0.135665 | 0.542726 | 0.516073 | Mapk13/M     |
| GO_BP_m1GO:007134skeletal mε3/2606    | 12/23843  | 0.135665 | 0.542726 | 0.516073 | Lrp4/Mesd    |
| GO_BP_m1GO:190022regulation 3/2606    | 12/23843  | 0.135665 | 0.542726 | 0.516073 | Cd36/Eif2a   |
| GO_BP_m1GO:19004Cregulation 3/2606    | 12/23843  | 0.135665 | 0.542726 | 0.516073 | Kat2a/Kat2   |
| GO_BP_m1GO:190184regulation 3/2606    | 12/23843  | 0.135665 | 0.542726 | 0.516073 | Cacnb2/Pd    |
| GO_BP_m1GO:19022εsemaphorii3/2606     | 12/23843  | 0.135665 | 0.542726 | 0.516073 | Plxna2/Plxr  |
| GO_BP_m1GO:00461εphenol-coε8/2606     | 47/23843  | 0.135681 | 0.542726 | 0.516073 | Dct/Ddt/Gc   |
| GO_BP_m1GO:00607εnegative re8/2606    | 47/23843  | 0.135681 | 0.542726 | 0.516073 | Arg1/Cactii  |
| GO_BP_m1GO:00702εnecrotic ce 8/2606   | 47/23843  | 0.135681 | 0.542726 | 0.516073 | Bnip3/Bok/   |
| GO_BP_m1GO:00072Cphospholipε16/2606   | 109/23843 | 0.136037 | 0.543328 | 0.516646 | Adra1d/An    |
| GO_BP_m1GO:00606Ctube closurε16/2606  | 109/23843 | 0.136037 | 0.543328 | 0.516646 | Abl2/Adm/    |
| GO_BP_m1GO:20001Cregulation 16/2606   | 109/23843 | 0.136037 | 0.543328 | 0.516646 | Adam8/Bln    |
| GO_BP_m1GO:00347εnegative re18/2606   | 125/23843 | 0.136102 | 0.543328 | 0.516646 | Adra1d/Arl   |
| GO_BP_m1GO:00067εATP biosyn17/2606    | 117/23843 | 0.136203 | 0.543328 | 0.516646 | Atp5a1/Atε   |
| GO_BP_m1GO:190037regulation 17/2606   | 117/23843 | 0.136203 | 0.543328 | 0.516646 | Adra1d/Ak    |
| GO_BP_m1GO:00068Cnitric oxide 11/2606 | 70/23843  | 0.13821  | 0.550832 | 0.523782 | Atp2b4/Ca    |
| GO_BP_m1GO:007217mesoneph11/2606      | 70/23843  | 0.13821  | 0.550832 | 0.523782 | Fgf1/Gdnf/   |
| GO_BP_m1GO:00439Cpositive reε23/2606  | 166/23843 | 0.13923  | 0.554487 | 0.527257 | Arg1/Cfl1/   |
| GO_BP_m1GO:000301muscle systε48/2606  | 375/23843 | 0.139253 | 0.554487 | 0.527257 | Abat/Acta2   |

|          |           |              |         |           |          |          |          |              |
|----------|-----------|--------------|---------|-----------|----------|----------|----------|--------------|
| GO_BP_m1 | GO:003582 | modificati   | 22/2606 | 158/23843 | 0.140309 | 0.55802  | 0.530616 | Anxa2/Arg    |
| GO_BP_m1 | GO:000226 | lymphocyt    | 12/2606 | 78/23843  | 0.140585 | 0.55802  | 0.530616 | Dock10/Gp    |
| GO_BP_m1 | GO:001403 | neural cres  | 12/2606 | 78/23843  | 0.140585 | 0.55802  | 0.530616 | Cfl1/Ednr    |
| GO_BP_m1 | GO:003016 | platelet act | 12/2606 | 78/23843  | 0.140585 | 0.55802  | 0.530616 | Abat/Alox1   |
| GO_BP_m1 | GO:003019 | regulation   | 12/2606 | 78/23843  | 0.140585 | 0.55802  | 0.530616 | Abat/Alox1   |
| GO_BP_m1 | GO:007207 | nephron tu   | 12/2606 | 78/23843  | 0.140585 | 0.55802  | 0.530616 | Fgf1/Gdnf/   |
| GO_BP_m1 | GO:190004 | regulation   | 12/2606 | 78/23843  | 0.140585 | 0.55802  | 0.530616 | Abat/Alox1   |
| GO_BP_m1 | GO:000282 | negative re  | 7/2606  | 40/23843  | 0.14083  | 0.558235 | 0.530821 | Arg1/Clec4   |
| GO_BP_m1 | GO:000602 | glycosamin   | 7/2606  | 40/23843  | 0.14083  | 0.558235 | 0.530821 | Chst13/Csc   |
| GO_BP_m1 | GO:004337 | regulation   | 7/2606  | 40/23843  | 0.14083  | 0.558235 | 0.530821 | lfng/Il2rg/J |
| GO_BP_m1 | GO:004660 | regulation   | 9/2606  | 55/23843  | 0.141463 | 0.560492 | 0.532967 | Chmp1b/K     |
| GO_BP_m1 | GO:007146 | cellular res | 20/2606 | 142/23843 | 0.142167 | 0.562153 | 0.534547 | Acs1/Akr1    |
| GO_BP_m1 | GO:000611 | oxidative p  | 13/2606 | 86/23843  | 0.142202 | 0.562153 | 0.534547 | Atp5o/Cdk    |
| GO_BP_m1 | GO:000616 | nucleoside   | 13/2606 | 86/23843  | 0.142202 | 0.562153 | 0.534547 | Bpgm/Eno     |
| GO_BP_m1 | GO:000930 | amine met.   | 13/2606 | 86/23843  | 0.142202 | 0.562153 | 0.534547 | Abat/Agma    |
| GO_BP_m1 | GO:004434 | cellular res | 13/2606 | 86/23843  | 0.142202 | 0.562153 | 0.534547 | Ctgf/Dll4/F  |
| GO_BP_m1 | GO:190129 | nucleoside   | 19/2606 | 134/23843 | 0.142903 | 0.564668 | 0.536938 | Bpgm/Der     |
| GO_BP_m1 | GO:005132 | meiotic cel  | 44/2606 | 342/23843 | 0.143174 | 0.565232 | 0.537474 | Btbd18/Cal   |
| GO_BP_m1 | GO:005196 | negative re  | 44/2606 | 342/23843 | 0.143174 | 0.565232 | 0.537474 | Aatk/Calr/C  |
| GO_BP_m1 | GO:003080 | regulation   | 17/2606 | 118/23843 | 0.143842 | 0.567613 | 0.539738 | Adra1d/Ak    |
| GO_BP_m1 | GO:000268 | regulation   | 16/2606 | 110/23843 | 0.143964 | 0.56784  | 0.539955 | Calr/Ccl4/C  |
| GO_BP_m1 | GO:000000 | mitochond    | 6/2606  | 33/23843  | 0.145152 | 0.569433 | 0.541469 | Fln/Lig3/F   |
| GO_BP_m1 | GO:000046 | maturation   | 6/2606  | 33/23843  | 0.145152 | 0.569433 | 0.541469 | Eri1/Exosc   |
| GO_BP_m1 | GO:000638 | transcripti  | 6/2606  | 33/23843  | 0.145152 | 0.569433 | 0.541469 | Foxa2/Gtf3   |
| GO_BP_m1 | GO:003438 | plasma lip   | 6/2606  | 33/23843  | 0.145152 | 0.569433 | 0.541469 | Anxa2/Cd3    |
| GO_BP_m1 | GO:190102 | positive re  | 6/2606  | 33/23843  | 0.145152 | 0.569433 | 0.541469 | Akap6/Asp    |
| GO_BP_m1 | GO:190166 | quinone m    | 6/2606  | 33/23843  | 0.145152 | 0.569433 | 0.541469 | Akr1c12/Ct   |
| GO_BP_m1 | GO:190305 | regulation   | 6/2606  | 33/23843  | 0.145152 | 0.569433 | 0.541469 | Abl2/Antxr   |
| GO_BP_m1 | GO:190395 | regulation   | 6/2606  | 33/23843  | 0.145152 | 0.569433 | 0.541469 | Abcb1a/Ar    |
| GO_BP_m1 | GO:007121 | cellular res | 36/2606 | 275/23843 | 0.145421 | 0.569433 | 0.541469 | Ankrd1/Atr   |
| GO_BP_m1 | GO:010400 | cellular res | 36/2606 | 275/23843 | 0.145421 | 0.569433 | 0.541469 | Ankrd1/Atr   |
| GO_BP_m1 | GO:000165 | branching    | 10/2606 | 63/23843  | 0.145541 | 0.569433 | 0.541469 | Fgf1/Gdnf/   |
| GO_BP_m1 | GO:004545 | cell redox   | 10/2606 | 63/23843  | 0.145541 | 0.569433 | 0.541469 | Ero1/Gpx1    |
| GO_BP_m1 | GO:000989 | positive re  | 49/2606 | 385/23843 | 0.14557  | 0.569433 | 0.541469 | Adam8/An     |
| GO_BP_m1 | GO:004352 | regulation   | 33/2606 | 250/23843 | 0.146181 | 0.569433 | 0.541469 | Adam8/Aif    |
| GO_BP_m1 | GO:004819 | Golgi vesic  | 33/2606 | 250/23843 | 0.146181 | 0.569433 | 0.541469 | Ankfy1/Arf   |
| GO_BP_m1 | GO:000197 | response tr  | 4/2606  | 19/23843  | 0.146377 | 0.569433 | 0.541469 | Drd3/Drd5    |
| GO_BP_m1 | GO:000652 | arginine m   | 4/2606  | 19/23843  | 0.146377 | 0.569433 | 0.541469 | Arg1/Atp2l   |
| GO_BP_m1 | GO:000820 | androgen r   | 4/2606  | 19/23843  | 0.146377 | 0.569433 | 0.541469 | Adm/Hsd1     |
| GO_BP_m1 | GO:000908 | branched-r   | 4/2606  | 19/23843  | 0.146377 | 0.569433 | 0.541469 | Bcat2/Bckd   |
| GO_BP_m1 | GO:001066 | positive re  | 4/2606  | 19/23843  | 0.146377 | 0.569433 | 0.541469 | Bnip3/Cam    |
| GO_BP_m1 | GO:001066 | positive re  | 4/2606  | 19/23843  | 0.146377 | 0.569433 | 0.541469 | Bnip3/Cam    |
| GO_BP_m1 | GO:001622 | iron-sulfur  | 4/2606  | 19/23843  | 0.146377 | 0.569433 | 0.541469 | Ciao1/Iba5   |
| GO_BP_m1 | GO:003116 | metallo-su   | 4/2606  | 19/23843  | 0.146377 | 0.569433 | 0.541469 | Ciao1/Iba5   |
| GO_BP_m1 | GO:003209 | regulation   | 4/2606  | 19/23843  | 0.146377 | 0.569433 | 0.541469 | Bbs2/Cartp   |
| GO_BP_m1 | GO:003236 | intracellula | 4/2606  | 19/23843  | 0.146377 | 0.569433 | 0.541469 | Anxa2/Ldlr   |
| GO_BP_m1 | GO:003549 | SNARE con    | 4/2606  | 19/23843  | 0.146377 | 0.569433 | 0.541469 | Stx4a/Trim   |
| GO_BP_m1 | GO:003599 | response tr  | 4/2606  | 19/23843  | 0.146377 | 0.569433 | 0.541469 | Ankrd1/Car   |

|                                |         |           |          |          |          |             |
|--------------------------------|---------|-----------|----------|----------|----------|-------------|
| GO_BP_m1GO:005158regulation    | 4/2606  | 19/23843  | 0.146377 | 0.569433 | 0.541469 | Arl6ip5/Gd  |
| GO_BP_m1GO:005190regulation    | 4/2606  | 19/23843  | 0.146377 | 0.569433 | 0.541469 | Alox12/Bo   |
| GO_BP_m1GO:006045positive re   | 4/2606  | 19/23843  | 0.146377 | 0.569433 | 0.541469 | Nr1h2/Opr   |
| GO_BP_m1GO:009720renal filtrat | 4/2606  | 19/23843  | 0.146377 | 0.569433 | 0.541469 | Adora1/Itg  |
| GO_BP_m1GO:000708regulation    | 22/2606 | 159/23843 | 0.146948 | 0.571038 | 0.542995 | Bora/Cdc2   |
| GO_BP_m1GO:000636rRNA proc     | 26/2606 | 192/23843 | 0.147519 | 0.571038 | 0.542995 | Bms1/Ddx2   |
| GO_BP_m1GO:000688cellular zin  | 5/2606  | 26/23843  | 0.1477   | 0.571038 | 0.542995 | Atp7b/Mt2   |
| GO_BP_m1GO:000906glutamine     | 5/2606  | 26/23843  | 0.1477   | 0.571038 | 0.542995 | Aldh4a1/Ai  |
| GO_BP_m1GO:000971catechol-c    | 5/2606  | 26/23843  | 0.1477   | 0.571038 | 0.542995 | Gch1/Hdc/   |
| GO_BP_m1GO:001049proteasom     | 5/2606  | 26/23843  | 0.1477   | 0.571038 | 0.542995 | Psm3/Psn    |
| GO_BP_m1GO:003026apoptotic r   | 5/2606  | 26/23843  | 0.1477   | 0.571038 | 0.542995 | Aifm1/Dffa  |
| GO_BP_m1GO:003136N-terminal    | 5/2606  | 26/23843  | 0.1477   | 0.571038 | 0.542995 | Kat2b/Map   |
| GO_BP_m1GO:004242catecholam    | 5/2606  | 26/23843  | 0.1477   | 0.571038 | 0.542995 | Gch1/Hdc/   |
| GO_BP_m1GO:004578positive re   | 5/2606  | 26/23843  | 0.1477   | 0.571038 | 0.542995 | Adam8/Os    |
| GO_BP_m1GO:004688positive re   | 5/2606  | 26/23843  | 0.1477   | 0.571038 | 0.542995 | Adam8/Os    |
| GO_BP_m1GO:007029sarcoplasm    | 5/2606  | 26/23843  | 0.1477   | 0.571038 | 0.542995 | Cacng1/Df   |
| GO_BP_m1GO:009018regulation    | 5/2606  | 26/23843  | 0.1477   | 0.571038 | 0.542995 | Gdnf/Lgr4/  |
| GO_BP_m1GO:190339positive re   | 5/2606  | 26/23843  | 0.1477   | 0.571038 | 0.542995 | Cfl1/Enpp2  |
| GO_BP_m1GO:001610diterpenoi    | 8/2606  | 48/23843  | 0.148176 | 0.57158  | 0.54351  | Adh1/Adhf   |
| GO_BP_m1GO:002154cranial nen   | 8/2606  | 48/23843  | 0.148176 | 0.57158  | 0.54351  | Atp8b1/Ep   |
| GO_BP_m1GO:004366regulation    | 8/2606  | 48/23843  | 0.148176 | 0.57158  | 0.54351  | 2810408A1   |
| GO_BP_m1GO:190157fatty acid d  | 8/2606  | 48/23843  | 0.148176 | 0.57158  | 0.54351  | Alox12/Alo  |
| GO_BP_m1GO:200040regulation    | 8/2606  | 48/23843  | 0.148176 | 0.57158  | 0.54351  | Adam8/Ccl   |
| GO_BP_m1GO:009009regulation    | 29/2606 | 217/23843 | 0.148231 | 0.57158  | 0.54351  | Bmp3/Cav    |
| GO_BP_m1GO:000918cyclic nucle  | 20/2606 | 143/23843 | 0.14925  | 0.575258 | 0.547008 | Adcy4/Adn   |
| GO_BP_m1GO:007208stem cell p   | 19/2606 | 135/23843 | 0.150231 | 0.576454 | 0.548145 | Abcb1a/Ar   |
| GO_BP_m1GO:003450protein loc   | 36/2606 | 276/23843 | 0.150507 | 0.576454 | 0.548145 | 1700123L1   |
| GO_BP_m1GO:000269positive re   | 13/2606 | 87/23843  | 0.151459 | 0.576454 | 0.548145 | Calr/Ccl4/C |
| GO_BP_m1GO:000918ribonucleo    | 13/2606 | 87/23843  | 0.151459 | 0.576454 | 0.548145 | Bpgm/Eno    |
| GO_BP_m1GO:003243regulation    | 17/2606 | 119/23843 | 0.151714 | 0.576454 | 0.548145 | Arih2/Bcap  |
| GO_BP_m1GO:004863positive re   | 27/2606 | 201/23843 | 0.151889 | 0.576454 | 0.548145 | Akap6/Arx   |
| GO_BP_m1GO:000911nucleoside    | 14/2606 | 95/23843  | 0.152092 | 0.576454 | 0.548145 | Acpp/Adk/   |
| GO_BP_m1GO:000194hair follicle | 16/2606 | 111/23843 | 0.152141 | 0.576454 | 0.548145 | Ctsl/Fgf7/F |
| GO_BP_m1GO:000006protein im    | 9/2606  | 56/23843  | 0.153222 | 0.576454 | 0.548145 | Abra/Arntl  |
| GO_BP_m1GO:001081negative re   | 9/2606  | 56/23843  | 0.153222 | 0.576454 | 0.548145 | Bcar1/Bcas  |
| GO_BP_m1GO:007234response tr   | 9/2606  | 56/23843  | 0.153222 | 0.576454 | 0.548145 | Abat/Adra   |
| GO_BP_m1GO:000686lipid transp  | 41/2606 | 319/23843 | 0.154383 | 0.576454 | 0.548145 | Abca12/Ab   |
| GO_BP_m1GO:000669prostanoid    | 7/2606  | 41/23843  | 0.154803 | 0.576454 | 0.548145 | Akr1c12/A   |
| GO_BP_m1GO:000669prostaglan    | 7/2606  | 41/23843  | 0.154803 | 0.576454 | 0.548145 | Akr1c12/A   |
| GO_BP_m1GO:001047regulation    | 7/2606  | 41/23843  | 0.154803 | 0.576454 | 0.548145 | Col5a1/Fox  |
| GO_BP_m1GO:003237regulation    | 7/2606  | 41/23843  | 0.154803 | 0.576454 | 0.548145 | Abca12/An   |
| GO_BP_m1GO:003237regulation    | 7/2606  | 41/23843  | 0.154803 | 0.576454 | 0.548145 | Abca12/An   |
| GO_BP_m1GO:003292activin rece  | 7/2606  | 41/23843  | 0.154803 | 0.576454 | 0.548145 | Cfc1/Dand   |
| GO_BP_m1GO:004218ketone bio    | 7/2606  | 41/23843  | 0.154803 | 0.576454 | 0.548145 | Coq10b/Cc   |
| GO_BP_m1GO:003237positive re   | 10/2606 | 64/23843  | 0.156653 | 0.576454 | 0.548145 | Abca12/An   |
| GO_BP_m1GO:000008G1/S transi   | 24/2606 | 177/23843 | 0.157291 | 0.576454 | 0.548145 | Camk2a/Cc   |
| GO_BP_m1GO:000920purine ribo   | 18/2606 | 128/23843 | 0.158871 | 0.576454 | 0.548145 | Atp5a1/At   |
| GO_BP_m1GO:004559regulation    | 18/2606 | 128/23843 | 0.158871 | 0.576454 | 0.548145 | Adig/Arntl  |



|                                |         |           |          |          |          |             |
|--------------------------------|---------|-----------|----------|----------|----------|-------------|
| GO_BP_m1GO:004427sulfur com    | 11/2606 | 72/23843  | 0.158912 | 0.576454 | 0.548145 | Apip/Chst1  |
| GO_BP_m1GO:00550C cardiac mu   | 11/2606 | 72/23843  | 0.158912 | 0.576454 | 0.548145 | Ankrd1/Dll  |
| GO_BP_m1GO:004881dendrite m    | 23/2606 | 169/23843 | 0.159041 | 0.576454 | 0.548145 | Abi1/Abi2/  |
| GO_BP_m1GO:00171E regulation   | 12/2606 | 80/23843  | 0.1603   | 0.576454 | 0.548145 | Catsper3/C  |
| GO_BP_m1GO:00720E nephron e    | 12/2606 | 80/23843  | 0.1603   | 0.576454 | 0.548145 | Fgf1/Gdnf/  |
| GO_BP_m1GO:19001E positive re  | 12/2606 | 80/23843  | 0.1603   | 0.576454 | 0.548145 | Cct3/Cdk1/  |
| GO_BP_m1GO:00461E alcohol bio  | 16/2606 | 112/23843 | 0.160564 | 0.576454 | 0.548145 | Acer3/Adcy  |
| GO_BP_m1GO:00109E regulation   | 50/2606 | 397/23843 | 0.160639 | 0.576454 | 0.548145 | Adcyap1r1.  |
| GO_BP_m1GO:00019E negative re  | 6/2606  | 34/23843  | 0.160984 | 0.576454 | 0.548145 | Bcas3/Enp   |
| GO_BP_m1GO:00320E response tr  | 6/2606  | 34/23843  | 0.160984 | 0.576454 | 0.548145 | Bbs2/Cartp  |
| GO_BP_m1GO:00336E regulation   | 6/2606  | 34/23843  | 0.160984 | 0.576454 | 0.548145 | Cib1/Epha   |
| GO_BP_m1GO:00400E regulation   | 6/2606  | 34/23843  | 0.160984 | 0.576454 | 0.548145 | Calr/Cdc20  |
| GO_BP_m1GO:00508E intestinal a | 6/2606  | 34/23843  | 0.160984 | 0.576454 | 0.548145 | Abcb1a/Cc   |
| GO_BP_m1GO:00973E response tr  | 6/2606  | 34/23843  | 0.160984 | 0.576454 | 0.548145 | Bcar1/Drd   |
| GO_BP_m1GO:00987E bone cell d  | 6/2606  | 34/23843  | 0.160984 | 0.576454 | 0.548145 | Abi1/Anxa   |
| GO_BP_m1GO:20001C positive re  | 6/2606  | 34/23843  | 0.160984 | 0.576454 | 0.548145 | Adam8/Hc    |
| GO_BP_m1GO:20007E regulation   | 6/2606  | 34/23843  | 0.160984 | 0.576454 | 0.548145 | Arntl/Mb2   |
| GO_BP_m1GO:00469E nucleotide   | 13/2606 | 88/23843  | 0.161026 | 0.576454 | 0.548145 | Bpgm/Eno    |
| GO_BP_m1GO:00609E regulation   | 13/2606 | 88/23843  | 0.161026 | 0.576454 | 0.548145 | Arhgap44/   |
| GO_BP_m1GO:00717E response tr  | 13/2606 | 88/23843  | 0.161026 | 0.576454 | 0.548145 | Ctgf/Dll4/F |
| GO_BP_m1GO:00726E lymphocyte   | 13/2606 | 88/23843  | 0.161026 | 0.576454 | 0.548145 | Adam8/Ccl   |
| GO_BP_m1GO:00352E segmentati   | 15/2606 | 104/23843 | 0.16106  | 0.576454 | 0.548145 | Abi1/Foxa   |
| GO_BP_m1GO:00019E positive re  | 8/2606  | 49/23843  | 0.161207 | 0.576454 | 0.548145 | Ccl28/Cd3   |
| GO_BP_m1GO:00311E regulation   | 8/2606  | 49/23843  | 0.161207 | 0.576454 | 0.548145 | Ankrd53/C   |
| GO_BP_m1GO:19020E regulation   | 8/2606  | 49/23843  | 0.161207 | 0.576454 | 0.548145 | Atf3/Dapk1  |
| GO_BP_m1GO:20006E regulation   | 8/2606  | 49/23843  | 0.161207 | 0.576454 | 0.548145 | Cav3/Drd3.  |
| GO_BP_m1GO:00105E regulation   | 14/2606 | 96/23843  | 0.161242 | 0.576454 | 0.548145 | Adcyap1r1.  |
| GO_BP_m1GO:00421C positive re  | 14/2606 | 96/23843  | 0.161242 | 0.576454 | 0.548145 | Adk/Blm/B   |
| GO_BP_m1GO:00442E cellular pol | 14/2606 | 96/23843  | 0.161242 | 0.576454 | 0.548145 | Aoah/B3gr   |
| GO_BP_m1GO:00608E artery deve  | 14/2606 | 96/23843  | 0.161242 | 0.576454 | 0.548145 | Adamts9/A   |
| GO_BP_m1GO:00720E nephron tu   | 14/2606 | 96/23843  | 0.161242 | 0.576454 | 0.548145 | Fgf1/Gdnf/  |
| GO_BP_m1GO:00506E nucleic acic | 21/2606 | 153/23843 | 0.162408 | 0.576454 | 0.548145 | Ahctf1/Dd   |
| GO_BP_m1GO:00506E RNA trans    | 21/2606 | 153/23843 | 0.162408 | 0.576454 | 0.548145 | Ahctf1/Dd   |
| GO_BP_m1GO:00004E maturation   | 3/2606  | 13/23843  | 0.162749 | 0.576454 | 0.548145 | Ftsj3/Rpf2/ |
| GO_BP_m1GO:00020E regulation   | 3/2606  | 13/23843  | 0.162749 | 0.576454 | 0.548145 | Adora1/Gls  |
| GO_BP_m1GO:00064E translation  | 3/2606  | 13/23843  | 0.162749 | 0.576454 | 0.548145 | Gspt2/Mtrf  |
| GO_BP_m1GO:00065E thyroid hor  | 3/2606  | 13/23843  | 0.162749 | 0.576454 | 0.548145 | Dio2/Duox   |
| GO_BP_m1GO:00071E meiosis II   | 3/2606  | 13/23843  | 0.162749 | 0.576454 | 0.548145 | Mastl/Ppp   |
| GO_BP_m1GO:00071E adenylate    | 3/2606  | 13/23843  | 0.162749 | 0.576454 | 0.548145 | Adra1d/Dri  |
| GO_BP_m1GO:00090E methionine   | 3/2606  | 13/23843  | 0.162749 | 0.576454 | 0.548145 | Apip/Enop   |
| GO_BP_m1GO:00103E regulation   | 3/2606  | 13/23843  | 0.162749 | 0.576454 | 0.548145 | Abcb1a/Prl  |
| GO_BP_m1GO:00108E cholesterol  | 3/2606  | 13/23843  | 0.162749 | 0.576454 | 0.548145 | Cd36/Nr1h   |
| GO_BP_m1GO:00108E regulation   | 3/2606  | 13/23843  | 0.162749 | 0.576454 | 0.548145 | Fkbp1b/Hr   |
| GO_BP_m1GO:00109E regulation   | 3/2606  | 13/23843  | 0.162749 | 0.576454 | 0.548145 | Cd36/Gprc   |
| GO_BP_m1GO:00109E regulation   | 3/2606  | 13/23843  | 0.162749 | 0.576454 | 0.548145 | Eif2ak1/Eif |
| GO_BP_m1GO:00148E regulation   | 3/2606  | 13/23843  | 0.162749 | 0.576454 | 0.548145 | Cav3/Myh    |
| GO_BP_m1GO:00190E modulator    | 3/2606  | 13/23843  | 0.162749 | 0.576454 | 0.548145 | Park2/Vapt  |
| GO_BP_m1GO:00216C cranial nen  | 3/2606  | 13/23843  | 0.162749 | 0.576454 | 0.548145 | Hoxb1/Kcn   |

|                                      |           |          |          |          |              |
|--------------------------------------|-----------|----------|----------|----------|--------------|
| GO_BP_m1GO:00316E positive re3/2606  | 13/23843  | 0.162749 | 0.576454 | 0.548145 | Abat/Ptgs2   |
| GO_BP_m1GO:00320E negative re3/2606  | 13/23843  | 0.162749 | 0.576454 | 0.548145 | Bbs2/Cartp   |
| GO_BP_m1GO:00340E maintenanc3/2606   | 13/23843  | 0.162749 | 0.576454 | 0.548145 | H2afy/Naa    |
| GO_BP_m1GO:003587 nucleotide 3/2606  | 13/23843  | 0.162749 | 0.576454 | 0.548145 | 5730559C1    |
| GO_BP_m1GO:00424E gamma-de3/2606     | 13/23843  | 0.162749 | 0.576454 | 0.548145 | Gpr18/Nck    |
| GO_BP_m1GO:00426E muscle cell3/2606  | 13/23843  | 0.162749 | 0.576454 | 0.548145 | Tbx1/Wnt3    |
| GO_BP_m1GO:004311 positive re3/2606  | 13/23843  | 0.162749 | 0.576454 | 0.548145 | Ccl4/Tacr2   |
| GO_BP_m1GO:004454 NLRP3 infl3/2606   | 13/23843  | 0.162749 | 0.576454 | 0.548145 | Cd36/Eif2a   |
| GO_BP_m1GO:00456E positive re3/2606  | 13/23843  | 0.162749 | 0.576454 | 0.548145 | Casp8/Prkc   |
| GO_BP_m1GO:00458E negative re3/2606  | 13/23843  | 0.162749 | 0.576454 | 0.548145 | Arl6ip5/Bni  |
| GO_BP_m1GO:00459C negative re3/2606  | 13/23843  | 0.162749 | 0.576454 | 0.548145 | Adm/Dock     |
| GO_BP_m1GO:00461E aldehyde c3/2606   | 13/23843  | 0.162749 | 0.576454 | 0.548145 | Adh5/Esd/I   |
| GO_BP_m1GO:004647 phosphatic3/2606   | 13/23843  | 0.162749 | 0.576454 | 0.548145 | Agpat2/Dg    |
| GO_BP_m1GO:00465C S-adenosy3/2606    | 13/23843  | 0.162749 | 0.576454 | 0.548145 | Ahcyl2/Ma    |
| GO_BP_m1GO:004801 hepatocyte3/2606   | 13/23843  | 0.162749 | 0.576454 | 0.548145 | Bcar1/Pak1   |
| GO_BP_m1GO:005264 alditol pho3/2606  | 13/23843  | 0.162749 | 0.576454 | 0.548145 | Acp6/Gk2/    |
| GO_BP_m1GO:00550E fatty acid h3/2606 | 13/23843  | 0.162749 | 0.576454 | 0.548145 | Dgat1/Got    |
| GO_BP_m1GO:00601E negative re3/2606  | 13/23843  | 0.162749 | 0.576454 | 0.548145 | Angptl3/Pli  |
| GO_BP_m1GO:006027 embryonic 3/2606   | 13/23843  | 0.162749 | 0.576454 | 0.548145 | Nog/Osr1/    |
| GO_BP_m1GO:00602E regulation 3/2606  | 13/23843  | 0.162749 | 0.576454 | 0.548145 | Npr2/Ppp2    |
| GO_BP_m1GO:00607E positive re3/2606  | 13/23843  | 0.162749 | 0.576454 | 0.548145 | Adcyap1r1    |
| GO_BP_m1GO:00608E establishm3/2606   | 13/23843  | 0.162749 | 0.576454 | 0.548145 | Abcb1a/Ac    |
| GO_BP_m1GO:00611E 3'-UTR-me3/2606    | 13/23843  | 0.162749 | 0.576454 | 0.548145 | Cpeb3/Khs    |
| GO_BP_m1GO:00619E meiosis II c3/2606 | 13/23843  | 0.162749 | 0.576454 | 0.548145 | Mastl/Ppp2   |
| GO_BP_m1GO:009011 cargo load3/2606   | 13/23843  | 0.162749 | 0.576454 | 0.548145 | Mia3/Sec2    |
| GO_BP_m1GO:00903E negative re3/2606  | 13/23843  | 0.162749 | 0.576454 | 0.548145 | Abat/Alox1   |
| GO_BP_m1GO:00903E regulation 3/2606  | 13/23843  | 0.162749 | 0.576454 | 0.548145 | Mecom/Pt     |
| GO_BP_m1GO:00970E presynaptic3/2606  | 13/23843  | 0.162749 | 0.576454 | 0.548145 | Lrp4/Lrrtm   |
| GO_BP_m1GO:00990E presynapse3/2606   | 13/23843  | 0.162749 | 0.576454 | 0.548145 | Lrp4/Nlgn    |
| GO_BP_m1GO:190012 negative re3/2606  | 13/23843  | 0.162749 | 0.576454 | 0.548145 | Il10/Nog/P   |
| GO_BP_m1GO:190074 regulation 3/2606  | 13/23843  | 0.162749 | 0.576454 | 0.548145 | Adgra2/Cd    |
| GO_BP_m1GO:19022E semaphori3/2606    | 13/23843  | 0.162749 | 0.576454 | 0.548145 | Plxna2/Plxr  |
| GO_BP_m1GO:190381 positive re3/2606  | 13/23843  | 0.162749 | 0.576454 | 0.548145 | Akap6/Kcn    |
| GO_BP_m1GO:190587 regulation 3/2606  | 13/23843  | 0.162749 | 0.576454 | 0.548145 | Npr2/Ppp2    |
| GO_BP_m1GO:20000E positive re3/2606  | 13/23843  | 0.162749 | 0.576454 | 0.548145 | Abl2/Csnk1   |
| GO_BP_m1GO:20010E regulation 3/2606  | 13/23843  | 0.162749 | 0.576454 | 0.548145 | Dek/Nudt1    |
| GO_BP_m1GO:005104 positive re61/2606 | 492/23843 | 0.162795 | 0.576454 | 0.548145 | Abat/Abl2/   |
| GO_BP_m1GO:00190E viral gene 9/2606  | 57/23843  | 0.165443 | 0.576454 | 0.548145 | Ccl4/Eif3f/I |
| GO_BP_m1GO:005067 positive re19/2606 | 137/23843 | 0.165499 | 0.576454 | 0.548145 | Adk/Blm/B    |
| GO_BP_m1GO:19035E regulation 19/2606 | 137/23843 | 0.165499 | 0.576454 | 0.548145 | Adam8/Car    |
| GO_BP_m1GO:00108C regulation 5/2606  | 27/23843  | 0.165974 | 0.576454 | 0.548145 | Ccdc3/Par    |
| GO_BP_m1GO:00304E tRNA meth5/2606    | 27/23843  | 0.165974 | 0.576454 | 0.548145 | Gtpbp3/M     |
| GO_BP_m1GO:00481C somatic ste5/2606  | 27/23843  | 0.165974 | 0.576454 | 0.548145 | Dct/Dock7    |
| GO_BP_m1GO:00550E zinc ion ho5/2606  | 27/23843  | 0.165974 | 0.576454 | 0.548145 | Atp7b/Mt2    |
| GO_BP_m1GO:00702E negative re5/2606  | 27/23843  | 0.165974 | 0.576454 | 0.548145 | Blm/Dock8    |
| GO_BP_m1GO:19022E regulation 5/2606  | 27/23843  | 0.165974 | 0.576454 | 0.548145 | Bok/Nck2/I   |
| GO_BP_m1GO:00102E endomemk44/2606    | 347/23843 | 0.166507 | 0.576454 | 0.548145 | Ahnak2/Ar    |
| GO_BP_m1GO:000911 vitamin bio4/2606  | 20/23843  | 0.168079 | 0.576454 | 0.548145 | lfng/Mmac    |

|                                               |           |          |          |          |             |
|-----------------------------------------------|-----------|----------|----------|----------|-------------|
| GO_BP_m1GO:001003response to4/2606            | 20/23843  | 0.168079 | 0.576454 | 0.548145 | Abat/Casp1  |
| GO_BP_m1GO:001407response to4/2606            | 20/23843  | 0.168079 | 0.576454 | 0.548145 | Drd3/Drd5   |
| GO_BP_m1GO:003164negative re4/2606            | 20/23843  | 0.168079 | 0.576454 | 0.548145 | Avpr1a/Ifn  |
| GO_BP_m1GO:003251negative re4/2606            | 20/23843  | 0.168079 | 0.576454 | 0.548145 | Fkbp1b/Ma   |
| GO_BP_m1GO:003268negative re4/2606            | 20/23843  | 0.168079 | 0.576454 | 0.548145 | C1qtnf3/Ep  |
| GO_BP_m1GO:003359regulation 4/2606            | 20/23843  | 0.168079 | 0.576454 | 0.548145 | Gpx1/Pygo   |
| GO_BP_m1GO:004398histone H4 4/2606            | 20/23843  | 0.168079 | 0.576454 | 0.548145 | Kansl1/Kan  |
| GO_BP_m1GO:004413negative re4/2606            | 20/23843  | 0.168079 | 0.576454 | 0.548145 | Cd36/Ifn    |
| GO_BP_m1GO:00600C Sertoli cell 4/2606         | 20/23843  | 0.168079 | 0.576454 | 0.548145 | Dmrt1/Hsd   |
| GO_BP_m1GO:007207nephron tu4/2606             | 20/23843  | 0.168079 | 0.576454 | 0.548145 | Gdnf/Irx2/I |
| GO_BP_m1GO:007224metanephro4/2606             | 20/23843  | 0.168079 | 0.576454 | 0.548145 | Lamb2/Lgr   |
| GO_BP_m1GO:008011DNA demethylation 4/2606     | 20/23843  | 0.168079 | 0.576454 | 0.548145 | Apobec1/T   |
| GO_BP_m1GO:009033regulation 4/2606            | 20/23843  | 0.168079 | 0.576454 | 0.548145 | Abat/Alox1  |
| GO_BP_m1GO:009963protein trafficking 4/2606   | 20/23843  | 0.168079 | 0.576454 | 0.548145 | Arhgap44/   |
| GO_BP_m1GO:009963neurotransmission 4/2606     | 20/23843  | 0.168079 | 0.576454 | 0.548145 | Arhgap44/   |
| GO_BP_m1GO:19001C regulation 4/2606           | 20/23843  | 0.168079 | 0.576454 | 0.548145 | Bok/Ficd/N  |
| GO_BP_m1GO:19052C negative regulation 4/2606  | 20/23843  | 0.168079 | 0.576454 | 0.548145 | Cav3/Pak1L  |
| GO_BP_m1GO:000222pattern recognition 17/2606  | 121/23843 | 0.168147 | 0.576454 | 0.548145 | 5730559C1   |
| GO_BP_m1GO:00181C peptidyl-tyrosine 17/2606   | 121/23843 | 0.168147 | 0.576454 | 0.548145 | Camk2a/Cc   |
| GO_BP_m1GO:00074C neuroblastoma 10/2606       | 65/23843  | 0.168172 | 0.576454 | 0.548145 | Dct/Dmrta   |
| GO_BP_m1GO:003508axoneme assembly 10/2606     | 65/23843  | 0.168172 | 0.576454 | 0.548145 | Bbs2/Cc2d   |
| GO_BP_m1GO:004477mitotic DNA damage 10/2606   | 65/23843  | 0.168172 | 0.576454 | 0.548145 | Blm/Ccng1   |
| GO_BP_m1GO:19049E negative regulation 25/2606 | 187/23843 | 0.168704 | 0.576454 | 0.548145 | C1qtnf3/Cc  |
| GO_BP_m1GO:000269regulation 45/2606           | 356/23843 | 0.168761 | 0.576454 | 0.548145 | Aplf/Arg1/I |
| GO_BP_m1GO:00109C regulation 16/2606          | 113/23843 | 0.169228 | 0.576454 | 0.548145 | C1qtnf3/Cc  |
| GO_BP_m1GO:004654development 16/2606          | 113/23843 | 0.169228 | 0.576454 | 0.548145 | Ccdc182/A   |
| GO_BP_m1GO:009877skin epidermis 16/2606       | 113/23843 | 0.169228 | 0.576454 | 0.548145 | Ctsl/Fgf7/F |
| GO_BP_m1GO:004001positive regulation 7/2606   | 42/23843  | 0.169385 | 0.576454 | 0.548145 | Bbs2/Ezr/G  |
| GO_BP_m1GO:004348RNA stability 7/2606         | 42/23843  | 0.169385 | 0.576454 | 0.548145 | Apobec1/N   |
| GO_BP_m1GO:003081regulation 11/2606           | 73/23843  | 0.169814 | 0.576454 | 0.548145 | Adm/Adra    |
| GO_BP_m1GO:000072double-strand break 15/2606  | 105/23843 | 0.170088 | 0.576454 | 0.548145 | Blm/Cdc7/I  |
| GO_BP_m1GO:000072recombination 15/2606        | 105/23843 | 0.170088 | 0.576454 | 0.548145 | Blm/Cdc7/I  |
| GO_BP_m1GO:000182mesonephros 15/2606          | 105/23843 | 0.170088 | 0.576454 | 0.548145 | Fgf1/Foxc1  |
| GO_BP_m1GO:003496histone lysis 15/2606        | 105/23843 | 0.170088 | 0.576454 | 0.548145 | Ash2l/Dmr   |
| GO_BP_m1GO:000647protein degradation 12/2606  | 81/23843  | 0.170656 | 0.576454 | 0.548145 | BC004004/   |
| GO_BP_m1GO:000721glutamate 12/2606            | 81/23843  | 0.170656 | 0.576454 | 0.548145 | Cacng5/Ca   |
| GO_BP_m1GO:001574organophosphorus 12/2606     | 81/23843  | 0.170656 | 0.576454 | 0.548145 | Abca12/Ab   |
| GO_BP_m1GO:007202nephron maturation 12/2606   | 81/23843  | 0.170656 | 0.576454 | 0.548145 | Fgf1/Gdnf/  |
| GO_BP_m1GO:190406negative regulation 12/2606  | 81/23843  | 0.170656 | 0.576454 | 0.548145 | Adra1d/Ca   |
| GO_BP_m1GO:004852negative regulation 14/2606  | 97/23843  | 0.17067  | 0.576454 | 0.548145 | Ccl4/Eif2ak |
| GO_BP_m1GO:00550C cardiac cell 13/2606        | 89/23843  | 0.170893 | 0.576454 | 0.548145 | Akap6/Cav   |
| GO_BP_m1GO:005502regulation 13/2606           | 89/23843  | 0.170893 | 0.576454 | 0.548145 | Akap6/Cav   |
| GO_BP_m1GO:00091C glycoprotein 34/2606        | 263/23843 | 0.171489 | 0.576454 | 0.548145 | A4gnt/Algf  |
| GO_BP_m1GO:004632regulation 23/2606           | 171/23843 | 0.173072 | 0.576454 | 0.548145 | Ctgf/Dusp3  |
| GO_BP_m1GO:000821regulation 26/2606           | 196/23843 | 0.173136 | 0.576454 | 0.548145 | Abat/Acta2  |
| GO_BP_m1GO:00004E exonucleolus 2/2606         | 7/23843   | 0.173184 | 0.576454 | 0.548145 | Eri1/Exosc9 |
| GO_BP_m1GO:00004E exonucleolus 2/2606         | 7/23843   | 0.173184 | 0.576454 | 0.548145 | Eri1/Exosc9 |
| GO_BP_m1GO:000269negative regulation 2/2606   | 7/23843   | 0.173184 | 0.576454 | 0.548145 | Bcr/Ccl28   |

|                                      |         |          |          |          |             |
|--------------------------------------|---------|----------|----------|----------|-------------|
| GO_BP_m1GO:000301voluntary s2/2606   | 7/23843 | 0.173184 | 0.576454 | 0.548145 | Myh7/Mylk   |
| GO_BP_m1GO:000332positive reç2/2606  | 7/23843 | 0.173184 | 0.576454 | 0.548145 | Adra1d/Dr   |
| GO_BP_m1GO:000614purine nucl2/2606   | 7/23843 | 0.173184 | 0.576454 | 0.548145 | Dpyd/Gda    |
| GO_BP_m1GO:0006377-methylgr2/2606    | 7/23843 | 0.173184 | 0.576454 | 0.548145 | Cmtr2/Rnn   |
| GO_BP_m1GO:000655leucine me2/2606    | 7/23843 | 0.173184 | 0.576454 | 0.548145 | Bcat2/Mccr  |
| GO_BP_m1GO:000721tachykinin i2/2606  | 7/23843 | 0.173184 | 0.576454 | 0.548145 | Tac1/Tacr2  |
| GO_BP_m1GO:000862intrinsic ap2/2606  | 7/23843 | 0.173184 | 0.576454 | 0.548145 | Ptgs2/Ybx3  |
| GO_BP_m1GO:000963response tr2/2606   | 7/23843 | 0.173184 | 0.576454 | 0.548145 | Mapk13/Zc   |
| GO_BP_m1GO:001051regulation 2/2606   | 7/23843 | 0.173184 | 0.576454 | 0.548145 | Fpr2/Pdgrfa |
| GO_BP_m1GO:001082positive reç2/2606  | 7/23843 | 0.173184 | 0.576454 | 0.548145 | Plk4/Poc1a  |
| GO_BP_m1GO:001088positive reç2/2606  | 7/23843 | 0.173184 | 0.576454 | 0.548145 | Cd36/Scarl  |
| GO_BP_m1GO:001089positive reç2/2606  | 7/23843 | 0.173184 | 0.576454 | 0.548145 | Fitm1/Plin5 |
| GO_BP_m1GO:001472twitch skelk2/2606  | 7/23843 | 0.173184 | 0.576454 | 0.548145 | Myh7/Mylk   |
| GO_BP_m1GO:001481skeletal mç2/2606   | 7/23843 | 0.173184 | 0.576454 | 0.548145 | Ephb1/Myk   |
| GO_BP_m1GO:003224positive reç2/2606  | 7/23843 | 0.173184 | 0.576454 | 0.548145 | Adora1/Rb   |
| GO_BP_m1GO:003253regulation 2/2606   | 7/23843 | 0.173184 | 0.576454 | 0.548145 | Ezr/Pls1    |
| GO_BP_m1GO:003414positive reç2/2606  | 7/23843 | 0.173184 | 0.576454 | 0.548145 | Cav1/Ptpn1  |
| GO_BP_m1GO:003415toll-like rec2/2606 | 7/23843 | 0.173184 | 0.576454 | 0.548145 | Ptpn22/Tre  |
| GO_BP_m1GO:003416regulation 2/2606   | 7/23843 | 0.173184 | 0.576454 | 0.548145 | Ptpn22/Tre  |
| GO_BP_m1GO:003576cell chemo2/2606    | 7/23843 | 0.173184 | 0.576454 | 0.548145 | Fgf1/Fgf16  |
| GO_BP_m1GO:003576endothelial2/2606   | 7/23843 | 0.173184 | 0.576454 | 0.548145 | Fgf1/Fgf16  |
| GO_BP_m1GO:003606protein O- 2/2606   | 7/23843 | 0.173184 | 0.576454 | 0.548145 | Slc35c1/Slc |
| GO_BP_m1GO:004227susceptibili2/2606  | 7/23843 | 0.173184 | 0.576454 | 0.548145 | Cadm1/Ulk   |
| GO_BP_m1GO:004232regulation 2/2606   | 7/23843 | 0.173184 | 0.576454 | 0.548145 | Htr7/Uts2r  |
| GO_BP_m1GO:004232negative re2/2606   | 7/23843 | 0.173184 | 0.576454 | 0.548145 | Adora1/Ht   |
| GO_BP_m1GO:004274circadian sl2/2606  | 7/23843 | 0.173184 | 0.576454 | 0.548145 | Htr7/Uts2r  |
| GO_BP_m1GO:004276tRNA 3'-er2/2606    | 7/23843 | 0.173184 | 0.576454 | 0.548145 | Elac1/Ptcd1 |
| GO_BP_m1GO:00431C amino acid2/2606   | 7/23843 | 0.173184 | 0.576454 | 0.548145 | Apip/Enop   |
| GO_BP_m1GO:004354molybdopt2/2606     | 7/23843 | 0.173184 | 0.576454 | 0.548145 | Gphn/Moc    |
| GO_BP_m1GO:00443E modulatio2/2606    | 7/23843 | 0.173184 | 0.576454 | 0.548145 | Anxa2/Nuc   |
| GO_BP_m1GO:004554positive reç2/2606  | 7/23843 | 0.173184 | 0.576454 | 0.548145 | Fgf1/Por    |
| GO_BP_m1GO:004563regulation 2/2606   | 7/23843 | 0.173184 | 0.576454 | 0.548145 | Adamts9/K   |
| GO_BP_m1GO:004643L-cysteine 2/2606   | 7/23843 | 0.173184 | 0.576454 | 0.548145 | Ahcyl2/Mtr  |
| GO_BP_m1GO:00466C negative re2/2606  | 7/23843 | 0.173184 | 0.576454 | 0.548145 | Kat2a/Kat2  |
| GO_BP_m1GO:00466E tetrahydrof2/2606  | 7/23843 | 0.173184 | 0.576454 | 0.548145 | Gch1/Mthf   |
| GO_BP_m1GO:004822plasma me2/2606     | 7/23843 | 0.173184 | 0.576454 | 0.548145 | Sgsm3/Usç   |
| GO_BP_m1GO:004847replication 2/2606  | 7/23843 | 0.173184 | 0.576454 | 0.548145 | Fbxo18/Tip  |
| GO_BP_m1GO:00487C embryonic 2/2606   | 7/23843 | 0.173184 | 0.576454 | 0.548145 | Mthfd11/Tu  |
| GO_BP_m1GO:00506E dermatan ç2/2606   | 7/23843 | 0.173184 | 0.576454 | 0.548145 | Dse/Dsel    |
| GO_BP_m1GO:005113positive reç2/2606  | 7/23843 | 0.173184 | 0.576454 | 0.548145 | Hsph1/Il12  |
| GO_BP_m1GO:005116prosthetic i2/2606  | 7/23843 | 0.173184 | 0.576454 | 0.548145 | Gphn/Moc    |
| GO_BP_m1GO:00522C modulatio2/2606    | 7/23843 | 0.173184 | 0.576454 | 0.548145 | Anxa2/Nuc   |
| GO_BP_m1GO:005242 modulatio2/2606    | 7/23843 | 0.173184 | 0.576454 | 0.548145 | Anxa2/Nuc   |
| GO_BP_m1GO:006001parathyroic2/2606   | 7/23843 | 0.173184 | 0.576454 | 0.548145 | Hoxa3/Tbx   |
| GO_BP_m1GO:00600E positive reç2/2606 | 7/23843 | 0.173184 | 0.576454 | 0.548145 | Mmp12/W     |
| GO_BP_m1GO:006037regulation 2/2606   | 7/23843 | 0.173184 | 0.576454 | 0.548145 | Cav3/Smac   |
| GO_BP_m1GO:00605E regulation 2/2606  | 7/23843 | 0.173184 | 0.576454 | 0.548145 | Ifng/Nfkb1  |
| GO_BP_m1GO:006067ureteric bu2/2606   | 7/23843 | 0.173184 | 0.576454 | 0.548145 | Gdnf/Nog    |

|                                       |           |          |          |          |             |
|---------------------------------------|-----------|----------|----------|----------|-------------|
| GO_BP_m1GO:00606εepithelial-r2/2606   | 7/23843   | 0.173184 | 0.576454 | 0.548145 | Pdgfa/Smc   |
| GO_BP_m1GO:00607εhair follicle 2/2606 | 7/23843   | 0.173184 | 0.576454 | 0.548145 | Hdac1/Hda   |
| GO_BP_m1GO:00611εfungiform 2/2606     | 7/23843   | 0.173184 | 0.576454 | 0.548145 | Hdac1/Hda   |
| GO_BP_m1GO:006131Notch sign 2/2606    | 7/23843   | 0.173184 | 0.576454 | 0.548145 | Dll4/Jag1   |
| GO_BP_m1GO:00615εacetylcholin 2/2606  | 7/23843   | 0.173184 | 0.576454 | 0.548145 | Htr6/Tacr2  |
| GO_BP_m1GO:007031G1 to G0 tr2/2606    | 7/23843   | 0.173184 | 0.576454 | 0.548145 | 1500015O:   |
| GO_BP_m1GO:007034negative re2/2606    | 7/23843   | 0.173184 | 0.576454 | 0.548145 | E2f1/E2f3   |
| GO_BP_m1GO:00704εprolactin sε2/2606   | 7/23843   | 0.173184 | 0.576454 | 0.548145 | Abat/Tacr2  |
| GO_BP_m1GO:00712εL-methioni2/2606     | 7/23843   | 0.173184 | 0.576454 | 0.548145 | Apip/Enop   |
| GO_BP_m1GO:00713εcellular res2/2606   | 7/23843   | 0.173184 | 0.576454 | 0.548145 | lfng/Ticam: |
| GO_BP_m1GO:007164regulation 2/2606    | 7/23843   | 0.173184 | 0.576454 | 0.548145 | Ticam2/Trp  |
| GO_BP_m1GO:00860εcell commu2/2606     | 7/23843   | 0.173184 | 0.576454 | 0.548145 | Cav1/Gjc1   |
| GO_BP_m1GO:00902C positive re2/2606   | 7/23843   | 0.173184 | 0.576454 | 0.548145 | Fgf1/Por    |
| GO_BP_m1GO:00903C spindle ass2/2606   | 7/23843   | 0.173184 | 0.576454 | 0.548145 | Washc5/Fb   |
| GO_BP_m1GO:00903ε positive re2/2606   | 7/23843   | 0.173184 | 0.576454 | 0.548145 | Mecom/Ptε   |
| GO_BP_m1GO:009764calcitonin f 2/2606  | 7/23843   | 0.173184 | 0.576454 | 0.548145 | Adm/Calcr   |
| GO_BP_m1GO:009894neurotrans 2/2606    | 7/23843   | 0.173184 | 0.576454 | 0.548145 | Cacng5/Ca   |
| GO_BP_m1GO:190004positive re2/2606    | 7/23843   | 0.173184 | 0.576454 | 0.548145 | Abl2/Btnl2  |
| GO_BP_m1GO:19001C regulation 2/2606   | 7/23843   | 0.173184 | 0.576454 | 0.548145 | Dand5/Dm    |
| GO_BP_m1GO:190024positive re2/2606    | 7/23843   | 0.173184 | 0.576454 | 0.548145 | Ddx60/Dhx   |
| GO_BP_m1GO:19010εnegative re2/2606    | 7/23843   | 0.173184 | 0.576454 | 0.548145 | Bok/Tmem    |
| GO_BP_m1GO:19011εneural cres 2/2606   | 7/23843   | 0.173184 | 0.576454 | 0.548145 | Gdnf/Semaε  |
| GO_BP_m1GO:190134positive re2/2606    | 7/23843   | 0.173184 | 0.576454 | 0.548145 | Asph/Stimε  |
| GO_BP_m1GO:19014εregulation 2/2606    | 7/23843   | 0.173184 | 0.576454 | 0.548145 | Epha2/Foxl  |
| GO_BP_m1GO:19018εregulation 2/2606    | 7/23843   | 0.173184 | 0.576454 | 0.548145 | Akap6/Pde   |
| GO_BP_m1GO:19030εregulation 2/2606    | 7/23843   | 0.173184 | 0.576454 | 0.548145 | Bcap31/Us   |
| GO_BP_m1GO:19032εmulti-ciliat 2/2606  | 7/23843   | 0.173184 | 0.576454 | 0.548145 | Deup1/Plkε  |
| GO_BP_m1GO:19033C positive re2/2606   | 7/23843   | 0.173184 | 0.576454 | 0.548145 | Pfkfb1/Tiga |
| GO_BP_m1GO:190354protein loc 2/2606   | 7/23843   | 0.173184 | 0.576454 | 0.548145 | Tulp1/Tulp  |
| GO_BP_m1GO:19039εpositive re2/2606    | 7/23843   | 0.173184 | 0.576454 | 0.548145 | Itgam/Ttbk  |
| GO_BP_m1GO:190477regulation 2/2606    | 7/23843   | 0.173184 | 0.576454 | 0.548145 | Epb41/Gna   |
| GO_BP_m1GO:190484regulation 2/2606    | 7/23843   | 0.173184 | 0.576454 | 0.548145 | Fgf1/Fgf16  |
| GO_BP_m1GO:20000ε positive re2/2606   | 7/23843   | 0.173184 | 0.576454 | 0.548145 | Abl2/Mllt3  |
| GO_BP_m1GO:20003εregulation 2/2606    | 7/23843   | 0.173184 | 0.576454 | 0.548145 | Amh/Hyalε   |
| GO_BP_m1GO:200054regulation 2/2606    | 7/23843   | 0.173184 | 0.576454 | 0.548145 | Fgf1/Fgf16  |
| GO_BP_m1GO:00070εcell cycle a19/2606  | 138/23843 | 0.173432 | 0.576454 | 0.548145 | AY074887/   |
| GO_BP_m1GO:00506εnegative re19/2606   | 138/23843 | 0.173432 | 0.576454 | 0.548145 | A4gnt/Atp!  |
| GO_BP_m1GO:00160εviral proceε35/2606  | 272/23843 | 0.174543 | 0.576454 | 0.548145 | Cav1/Ccl4/  |
| GO_BP_m1GO:00091εnucleotide 39/2606   | 306/23843 | 0.174698 | 0.576454 | 0.548145 | Adcy4/Adk   |
| GO_BP_m1GO:00099εoocyte diffε8/2606   | 50/23843  | 0.174749 | 0.576454 | 0.548145 | Dmrt1/Waε   |
| GO_BP_m1GO:004214cellular resε8/2606  | 50/23843  | 0.174749 | 0.576454 | 0.548145 | Cpeb4/Gm    |
| GO_BP_m1GO:003001establishmε18/2606   | 130/23843 | 0.175122 | 0.576454 | 0.548145 | Bcas3/Cenε  |
| GO_BP_m1GO:00550εlipid homeε18/2606   | 130/23843 | 0.175122 | 0.576454 | 0.548145 | Abca12/An   |
| GO_BP_m1GO:00072εsmall GTPa61/2606    | 495/23843 | 0.175143 | 0.576454 | 0.548145 | Aatk/Abl2/  |
| GO_BP_m1GO:00517εregulation 25/2606   | 188/23843 | 0.175522 | 0.576454 | 0.548145 | Bora/Calr/( |
| GO_BP_m1GO:00602εlong-term 30/2606    | 230/23843 | 0.175981 | 0.576454 | 0.548145 | Cpeb3/Grir  |
| GO_BP_m1GO:00091εnucleotide 17/2606   | 122/23843 | 0.176698 | 0.576454 | 0.548145 | Bpgm/Derε   |
| GO_BP_m1GO:00026ε positive re2/2606   | 435/23843 | 0.177007 | 0.576454 | 0.548145 | Adam8/Ad    |

|                                      |           |          |          |          |              |
|--------------------------------------|-----------|----------|----------|----------|--------------|
| GO_BP_m1GO:000714female mei6/2606    | 35/23843  | 0.177519 | 0.576454 | 0.548145 | Washc5/Fb    |
| GO_BP_m1GO:000815negative re6/2606   | 35/23843  | 0.177519 | 0.576454 | 0.548145 | Atr/Fbxo18   |
| GO_BP_m1GO:001403Schwann c6/2606     | 35/23843  | 0.177519 | 0.576454 | 0.548145 | Ahnak2/Cc    |
| GO_BP_m1GO:003167cellular res6/2606  | 35/23843  | 0.177519 | 0.576454 | 0.548145 | Foxa2/Hsp    |
| GO_BP_m1GO:003579positive re6/2606   | 35/23843  | 0.177519 | 0.576454 | 0.548145 | Bnip3/Bok/   |
| GO_BP_m1GO:004519regulation 6/2606   | 35/23843  | 0.177519 | 0.576454 | 0.548145 | Aplf/Ifng/Il |
| GO_BP_m1GO:005502negative re6/2606   | 35/23843  | 0.177519 | 0.576454 | 0.548145 | Cav3/Hdac    |
| GO_BP_m1GO:009730programm6/2606      | 35/23843  | 0.177519 | 0.576454 | 0.548145 | Bok/Casp8.   |
| GO_BP_m1GO:004685regulation 9/2606   | 58/23843  | 0.178108 | 0.576454 | 0.548145 | Adam8/Ca     |
| GO_BP_m1GO:002240molting cyc16/2606  | 114/23843 | 0.178127 | 0.576454 | 0.548145 | Ctsl/Fgf7/F  |
| GO_BP_m1GO:002240hair cycle p16/2606 | 114/23843 | 0.178127 | 0.576454 | 0.548145 | Ctsl/Fgf7/F  |
| GO_BP_m1GO:004354protein acy29/2606  | 222/23843 | 0.178623 | 0.576454 | 0.548145 | Arntl/Brpf3  |
| GO_BP_m1GO:000688exocytosis 41/2606  | 324/23843 | 0.17974  | 0.576454 | 0.548145 | Abca12/An    |
| GO_BP_m1GO:000263regulation 10/2606  | 66/23843  | 0.180082 | 0.576454 | 0.548145 | Aplf/Ifng/Il |
| GO_BP_m1GO:003043ubiquitin-c10/2606  | 66/23843  | 0.180082 | 0.576454 | 0.548145 | Bcap31/Hs    |
| GO_BP_m1GO:005502regulation 10/2606  | 66/23843  | 0.180082 | 0.576454 | 0.548145 | Akap6/Cav    |
| GO_BP_m1GO:006068regulation 10/2606  | 66/23843  | 0.180082 | 0.576454 | 0.548145 | Cav3/Cdh1    |
| GO_BP_m1GO:006109regulation 10/2606  | 66/23843  | 0.180082 | 0.576454 | 0.548145 | Adora1/Ca    |
| GO_BP_m1GO:190551non-motile10/2606   | 66/23843  | 0.180082 | 0.576454 | 0.548145 | Bbs10/Bbs:   |
| GO_BP_m1GO:003315regulation 35/2606  | 273/23843 | 0.180275 | 0.576454 | 0.548145 | Arih2/Asph   |
| GO_BP_m1GO:004506regulation 13/2606  | 90/23843  | 0.181054 | 0.576454 | 0.548145 | Eif2ak2/Fkt  |
| GO_BP_m1GO:007145cellular res13/2606 | 90/23843  | 0.181054 | 0.576454 | 0.548145 | Adam8/Bni    |
| GO_BP_m1GO:190288regulation 13/2606  | 90/23843  | 0.181054 | 0.576454 | 0.548145 | Cd36/Endc    |
| GO_BP_m1GO:000862extrinsic ap11/2606 | 74/23843  | 0.181068 | 0.576454 | 0.548145 | Atf3/Casp8   |
| GO_BP_m1GO:001401positive re11/2606  | 74/23843  | 0.181068 | 0.576454 | 0.548145 | Enpp2/Hda    |
| GO_BP_m1GO:003246regulation 11/2606  | 74/23843  | 0.181068 | 0.576454 | 0.548145 | Ahctf1/Ank   |
| GO_BP_m1GO:003020glycosamin12/2606   | 82/23843  | 0.181331 | 0.576454 | 0.548145 | Chst13/Csc   |
| GO_BP_m1GO:003264regulation 12/2606  | 82/23843  | 0.181331 | 0.576454 | 0.548145 | C1qtnf3/Eil  |
| GO_BP_m1GO:005081regulation 12/2606  | 82/23843  | 0.181331 | 0.576454 | 0.548145 | Abat/Alox1   |
| GO_BP_m1GO:004477mitotic cell44/2606 | 350/23843 | 0.181495 | 0.576454 | 0.548145 | Abcb1a/Blr   |
| GO_BP_m1GO:000181negative re30/2606  | 231/23843 | 0.182263 | 0.576454 | 0.548145 | Arg1/C1qt    |
| GO_BP_m1GO:000640RNA localiz25/2606  | 189/23843 | 0.182486 | 0.576454 | 0.548145 | Ahctf1/Atr/  |
| GO_BP_m1GO:003505cardiocyte 22/2606  | 164/23843 | 0.182734 | 0.576454 | 0.548145 | Akap6/Cav    |
| GO_BP_m1GO:004212regulation 22/2606  | 164/23843 | 0.182734 | 0.576454 | 0.548145 | Adk/Arg1/I   |
| GO_BP_m1GO:190198regulation 36/2606  | 282/23843 | 0.183166 | 0.576454 | 0.548145 | Atp2b4/Blr   |
| GO_BP_m1GO:001060posttranscr58/2606  | 471/23843 | 0.183549 | 0.576454 | 0.548145 | Apobec1/E    |
| GO_BP_m1GO:000920ribonucleo:18/2606  | 131/23843 | 0.183556 | 0.576454 | 0.548145 | Atp5a1/Atq   |
| GO_BP_m1GO:004230molting cyc18/2606  | 131/23843 | 0.183556 | 0.576454 | 0.548145 | Arntl/Clock  |
| GO_BP_m1GO:004263hair cycle 18/2606  | 131/23843 | 0.183556 | 0.576454 | 0.548145 | Arntl/Clock  |
| GO_BP_m1GO:004885brain morp7/2606    | 43/23843  | 0.184539 | 0.576454 | 0.548145 | Bbs2/Cdh2    |
| GO_BP_m1GO:007052platelet ag7/2606   | 43/23843  | 0.184539 | 0.576454 | 0.548145 | Abat/Alox1   |
| GO_BP_m1GO:190103regulation 7/2606   | 43/23843  | 0.184539 | 0.576454 | 0.548145 | Cd36/Endc    |
| GO_BP_m1GO:190274regulation 7/2606   | 43/23843  | 0.184539 | 0.576454 | 0.548145 | Cfl1/Enpp2   |
| GO_BP_m1GO:200005negative re7/2606   | 43/23843  | 0.184539 | 0.576454 | 0.548145 | N4bp1/Og     |
| GO_BP_m1GO:200125negative re7/2606   | 43/23843  | 0.184539 | 0.576454 | 0.548145 | Adra1d/Ca    |
| GO_BP_m1GO:000030response tr5/2606   | 28/23843  | 0.185082 | 0.576454 | 0.548145 | Cd36/FbIn    |
| GO_BP_m1GO:001075regulation 5/2606   | 28/23843  | 0.185082 | 0.576454 | 0.548145 | Cxcl17/Ddt   |
| GO_BP_m1GO:003315regulation 5/2606   | 28/23843  | 0.185082 | 0.576454 | 0.548145 | Cdk1/Cdkn    |

|                                       |           |          |          |          |             |
|---------------------------------------|-----------|----------|----------|----------|-------------|
| GO_BP_m1GO:003315response tr5/2606    | 28/23843  | 0.185082 | 0.576454 | 0.548145 | Asph/Dgkc   |
| GO_BP_m1GO:004400modificatic5/2606    | 28/23843  | 0.185082 | 0.576454 | 0.548145 | Hyal2/Myc   |
| GO_BP_m1GO:004506regulatory 5/2606    | 28/23843  | 0.185082 | 0.576454 | 0.548145 | Ctla4/Ifng/ |
| GO_BP_m1GO:004591negative re5/2606    | 28/23843  | 0.185082 | 0.576454 | 0.548145 | Blm/Fbxo1   |
| GO_BP_m1GO:007235signal trans5/2606   | 28/23843  | 0.185082 | 0.576454 | 0.548145 | Babam2/Cc   |
| GO_BP_m1GO:007240signal trans5/2606   | 28/23843  | 0.185082 | 0.576454 | 0.548145 | Babam2/Cc   |
| GO_BP_m1GO:007242signal trans5/2606   | 28/23843  | 0.185082 | 0.576454 | 0.548145 | Babam2/Cc   |
| GO_BP_m1GO:200027negative re5/2606    | 28/23843  | 0.185082 | 0.576454 | 0.548145 | Cnrip1/Crh  |
| GO_BP_m1GO:006040cytosolic c21/2606   | 156/23843 | 0.185134 | 0.576454 | 0.548145 | Adcyap1r1   |
| GO_BP_m1GO:000275innate immr17/2606   | 123/23843 | 0.185465 | 0.576454 | 0.548145 | 5730559C1   |
| GO_BP_m1GO:000276regulation 17/2606   | 123/23843 | 0.185465 | 0.576454 | 0.548145 | Adam8/Ca    |
| GO_BP_m1GO:190018regulation 17/2606   | 123/23843 | 0.185465 | 0.576454 | 0.548145 | Cct3/Cdk1   |
| GO_BP_m1GO:190165cellular resj33/2606 | 257/23843 | 0.186053 | 0.576454 | 0.548145 | Appl1/Bcar  |
| GO_BP_m1GO:000752neuromusc8/2606      | 51/23843  | 0.188777 | 0.576454 | 0.548145 | Cacnb2/Dc   |
| GO_BP_m1GO:003007regulation 8/2606    | 51/23843  | 0.188777 | 0.576454 | 0.548145 | Cdc23/Klhl  |
| GO_BP_m1GO:004582negative re8/2606    | 51/23843  | 0.188777 | 0.576454 | 0.548145 | Arg1/Cacti  |
| GO_BP_m1GO:004690regulation 8/2606    | 51/23843  | 0.188777 | 0.576454 | 0.548145 | Bnip3/Bok/  |
| GO_BP_m1GO:004824lymphocyt8/2606      | 51/23843  | 0.188777 | 0.576454 | 0.548145 | Adam8/Ccl   |
| GO_BP_m1GO:000834adult locon15/2606   | 107/23843 | 0.188894 | 0.576454 | 0.548145 | Abl2/Cend   |
| GO_BP_m1GO:007265protein loc32/2606   | 249/23843 | 0.189032 | 0.576454 | 0.548145 | Abca12/An   |
| GO_BP_m1GO:014001mitotic nuc34/2606   | 266/23843 | 0.189114 | 0.576454 | 0.548145 | Ankrd53/Bi  |
| GO_BP_m1GO:007170tumor necr19/2606    | 140/23843 | 0.189876 | 0.576454 | 0.548145 | Adam8/Ca    |
| GO_BP_m1GO:001975polyol met.14/2606   | 99/23843  | 0.190329 | 0.576454 | 0.548145 | Acer3/Adcy  |
| GO_BP_m1GO:006113regulation 22/2606   | 165/23843 | 0.190391 | 0.576454 | 0.548145 | Arih2/Bcap  |
| GO_BP_m1GO:000208regulation 4/2606    | 21/23843  | 0.190823 | 0.576454 | 0.548145 | Cdk1/Myc/   |
| GO_BP_m1GO:000328atrial septu4/2606   | 21/23843  | 0.190823 | 0.576454 | 0.548145 | Cfc1/Dand   |
| GO_BP_m1GO:000762grooming l4/2606     | 21/23843  | 0.190823 | 0.576454 | 0.548145 | Aprt/Avpr1  |
| GO_BP_m1GO:001491negative re4/2606    | 21/23843  | 0.190823 | 0.576454 | 0.548145 | Igfbp3/Ndr  |
| GO_BP_m1GO:001812protein hyc4/2606    | 21/23843  | 0.190823 | 0.576454 | 0.548145 | Asph/Egln3  |
| GO_BP_m1GO:003157mitotic G1 4/2606    | 21/23843  | 0.190823 | 0.576454 | 0.548145 | Cdkn1a/Fb   |
| GO_BP_m1GO:004412regulation 4/2606    | 21/23843  | 0.190823 | 0.576454 | 0.548145 | Cd36/Ifng/  |
| GO_BP_m1GO:004668response tr4/2606    | 21/23843  | 0.190823 | 0.576454 | 0.548145 | As3mt/Ma    |
| GO_BP_m1GO:004848parasympa4/2606      | 21/23843  | 0.190823 | 0.576454 | 0.548145 | Gdnf/Hoxb   |
| GO_BP_m1GO:006105regulation 4/2606    | 21/23843  | 0.190823 | 0.576454 | 0.548145 | Akap6/Cav   |
| GO_BP_m1GO:009706dendritic s4/2606    | 21/23843  | 0.190823 | 0.576454 | 0.548145 | Abl2/Cfl1/C |
| GO_BP_m1GO:000666phosphatic9/2606     | 59/23843  | 0.191194 | 0.576454 | 0.548145 | Fpr2/Pdgfa  |
| GO_BP_m1GO:000680superoxide9/2606     | 59/23843  | 0.191194 | 0.576454 | 0.548145 | Cd36/Fbln1  |
| GO_BP_m1GO:003272positive re9/2606    | 59/23843  | 0.191194 | 0.576454 | 0.548145 | Eif2ak2/Hd  |
| GO_BP_m1GO:004684filopodium 9/2606    | 59/23843  | 0.191194 | 0.576454 | 0.548145 | Bcas3/Dnr   |
| GO_BP_m1GO:005130mitotic sist9/2606   | 59/23843  | 0.191194 | 0.576454 | 0.548145 | Cdc23/Klhl  |
| GO_BP_m1GO:007020protein trin9/2606   | 59/23843  | 0.191194 | 0.576454 | 0.548145 | Arg1/C1qt   |
| GO_BP_m1GO:190351mucopolys9/2606      | 59/23843  | 0.191194 | 0.576454 | 0.548145 | Chst13/Csq  |
| GO_BP_m1GO:000177immunolog3/2606      | 14/23843  | 0.191261 | 0.576454 | 0.548145 | Dock8/Eph   |
| GO_BP_m1GO:000209tRNA wobk3/2606      | 14/23843  | 0.191261 | 0.576454 | 0.548145 | 6430573F1   |
| GO_BP_m1GO:000282negative re3/2606    | 14/23843  | 0.191261 | 0.576454 | 0.548145 | Arg1/Il27ra |
| GO_BP_m1GO:000315morphoge13/2606      | 14/23843  | 0.191261 | 0.576454 | 0.548145 | Cxcl10/Dll4 |
| GO_BP_m1GO:000653cysteine m3/2606     | 14/23843  | 0.191261 | 0.576454 | 0.548145 | Ahcyl2/Gcl  |
| GO_BP_m1GO:000657amino-acic3/2606     | 14/23843  | 0.191261 | 0.576454 | 0.548145 | Aldh9a1/Ci  |

|                                      |           |          |          |          |             |
|--------------------------------------|-----------|----------|----------|----------|-------------|
| GO_BP_m1GO:001064negative re3/2606   | 14/23843  | 0.191261 | 0.576454 | 0.548145 | Ndrp4/Ptpn  |
| GO_BP_m1GO:001080negative re3/2606   | 14/23843  | 0.191261 | 0.576454 | 0.548145 | Dgkq/Ogt/   |
| GO_BP_m1GO:001087positive re3/2606   | 14/23843  | 0.191261 | 0.576454 | 0.548145 | Abca12/Nr   |
| GO_BP_m1GO:001593coenzyme 3/2606     | 14/23843  | 0.191261 | 0.576454 | 0.548145 | Crot/Dcack  |
| GO_BP_m1GO:001632neuron ren3/2606    | 14/23843  | 0.191261 | 0.576454 | 0.548145 | Abl2/C1q1   |
| GO_BP_m1GO:003209negative re3/2606   | 14/23843  | 0.191261 | 0.576454 | 0.548145 | Bbs2/Cartp  |
| GO_BP_m1GO:003253regulation 3/2606   | 14/23843  | 0.191261 | 0.576454 | 0.548145 | Ezr/Pls1/W  |
| GO_BP_m1GO:003509sperm chr3/2606     | 14/23843  | 0.191261 | 0.576454 | 0.548145 | Psme4/Syc   |
| GO_BP_m1GO:003556positive re3/2606   | 14/23843  | 0.191261 | 0.576454 | 0.548145 | Hmbox1/K    |
| GO_BP_m1GO:004312surfactant l3/2606  | 14/23843  | 0.191261 | 0.576454 | 0.548145 | Abca12/Fg   |
| GO_BP_m1GO:004355regulation 3/2606   | 14/23843  | 0.191261 | 0.576454 | 0.548145 | Eif2ak1/Eif |
| GO_BP_m1GO:004365dicarboxyli3/2606   | 14/23843  | 0.191261 | 0.576454 | 0.548145 | Gls/Got1/M  |
| GO_BP_m1GO:004589positive re3/2606   | 14/23843  | 0.191261 | 0.576454 | 0.548145 | Cand1/Psr   |
| GO_BP_m1GO:004831Golgi inher3/2606   | 14/23843  | 0.191261 | 0.576454 | 0.548145 | Cdk1/Gbf1   |
| GO_BP_m1GO:005066homocyste 3/2606    | 14/23843  | 0.191261 | 0.576454 | 0.548145 | Blmh/Mtrr/  |
| GO_BP_m1GO:005138kinetochor3/2606    | 14/23843  | 0.191261 | 0.576454 | 0.548145 | Cenpa/Cer   |
| GO_BP_m1GO:005178negative re3/2606   | 14/23843  | 0.191261 | 0.576454 | 0.548145 | Blm/E2f7/M  |
| GO_BP_m1GO:005189negative re3/2606   | 14/23843  | 0.191261 | 0.576454 | 0.548145 | Bcas3/Itgb  |
| GO_BP_m1GO:006083smoothene3/2606     | 14/23843  | 0.191261 | 0.576454 | 0.548145 | Prkacb/Tra  |
| GO_BP_m1GO:006115endothelial3/2606   | 14/23843  | 0.191261 | 0.576454 | 0.548145 | Cxcl10/Dll4 |
| GO_BP_m1GO:007137cellular res3/2606  | 14/23843  | 0.191261 | 0.576454 | 0.548145 | Epha8/Ppa   |
| GO_BP_m1GO:007194nitrogen cy3/2606   | 14/23843  | 0.191261 | 0.576454 | 0.548145 | Arg1/Otc/S  |
| GO_BP_m1GO:009906postsynaps3/2606    | 14/23843  | 0.191261 | 0.576454 | 0.548145 | Cdh2/Lrp4,  |
| GO_BP_m1GO:190254regulation 3/2606   | 14/23843  | 0.191261 | 0.576454 | 0.548145 | Adgra2/Cd   |
| GO_BP_m1GO:190335regulation 3/2606   | 14/23843  | 0.191261 | 0.576454 | 0.548145 | Rbsn/Stx5a  |
| GO_BP_m1GO:200104regulation 3/2606   | 14/23843  | 0.191261 | 0.576454 | 0.548145 | Cd63/Itgb1  |
| GO_BP_m1GO:003650ERAD path 13/2606   | 91/23843  | 0.191498 | 0.576454 | 0.548145 | Bcap31/Hs   |
| GO_BP_m1GO:005140neuron apc35/2606   | 275/23843 | 0.192042 | 0.576454 | 0.548145 | Aatk/Adam   |
| GO_BP_m1GO:000858regulation 12/2606  | 83/23843  | 0.192314 | 0.576454 | 0.548145 | Ankmy2/Fc   |
| GO_BP_m1GO:001403mesenchyr 12/2606   | 83/23843  | 0.192314 | 0.576454 | 0.548145 | Cfl1/Ednrb, |
| GO_BP_m1GO:003276positive re12/2606  | 83/23843  | 0.192314 | 0.576454 | 0.548145 | Ccl4/Cd36/  |
| GO_BP_m1GO:004263cholesterol 12/2606 | 83/23843  | 0.192314 | 0.576454 | 0.548145 | Angptl3/Ca  |
| GO_BP_m1GO:005509sterol hom 12/2606  | 83/23843  | 0.192314 | 0.576454 | 0.548145 | Angptl3/Ca  |
| GO_BP_m1GO:190187regulation 12/2606  | 83/23843  | 0.192314 | 0.576454 | 0.548145 | Asph/Cfl1/  |
| GO_BP_m1GO:003238negative re10/2606  | 67/23843  | 0.192367 | 0.576454 | 0.548145 | Cdk5/Ei24/  |
| GO_BP_m1GO:003265regulation 10/2606  | 67/23843  | 0.192367 | 0.576454 | 0.548145 | 5730559C1   |
| GO_BP_m1GO:003410homotypic 10/2606   | 67/23843  | 0.192367 | 0.576454 | 0.548145 | Abat/Alox1  |
| GO_BP_m1GO:000648protein N- 11/2606  | 75/23843  | 0.192659 | 0.576454 | 0.548145 | Alg6/Ccdc   |
| GO_BP_m1GO:009775positive re11/2606  | 75/23843  | 0.192659 | 0.576454 | 0.548145 | Adm/Ador.   |
| GO_BP_m1GO:000611regulation 6/2606   | 36/23843  | 0.194703 | 0.576454 | 0.548145 | Esrrb/Myc/  |
| GO_BP_m1GO:000725activation c6/2606  | 36/23843  | 0.194703 | 0.576454 | 0.548145 | Gab1/Map    |
| GO_BP_m1GO:004816regulation 6/2606   | 36/23843  | 0.194703 | 0.576454 | 0.548145 | Drd5/Grin2  |
| GO_BP_m1GO:005093pigment ce6/2606    | 36/23843  | 0.194703 | 0.576454 | 0.548145 | Adamts9/B   |
| GO_BP_m1GO:005108'de novo' p6/2606   | 36/23843  | 0.194703 | 0.576454 | 0.548145 | Ero1l/H2-C  |
| GO_BP_m1GO:008600regulation 6/2606   | 36/23843  | 0.194703 | 0.576454 | 0.548145 | Akap6/Cav   |
| GO_BP_m1GO:001931hexose me 28/2606   | 216/23843 | 0.194705 | 0.576454 | 0.548145 | Atf3/Bpgm   |
| GO_BP_m1GO:003210positive re36/2606  | 284/23843 | 0.194846 | 0.576454 | 0.548145 | Adam8/Ao    |
| GO_BP_m1GO:003090forebrain d46/2606  | 370/23843 | 0.196047 | 0.576454 | 0.548145 | Aldh1a3/Ai  |



|                                |         |           |          |          |          |             |
|--------------------------------|---------|-----------|----------|----------|----------|-------------|
| GO_BP_m1GO:000279regulation    | 59/2606 | 483/23843 | 0.198584 | 0.576454 | 0.548145 | Abat/Abl2/  |
| GO_BP_m1GO:000597polysaccha    | 15/2606 | 108/23843 | 0.198657 | 0.576454 | 0.548145 | Aoah/B3gr   |
| GO_BP_m1GO:003524synaptic tra  | 15/2606 | 108/23843 | 0.198657 | 0.576454 | 0.548145 | Adora1/Ad   |
| GO_BP_m1GO:005120sequesterir   | 15/2606 | 108/23843 | 0.198657 | 0.576454 | 0.548145 | Akap6/Asp   |
| GO_BP_m1GO:005122negative re   | 24/2606 | 183/23843 | 0.199903 | 0.576454 | 0.548145 | C1qtnf3/Cc  |
| GO_BP_m1GO:200102regulation    | 24/2606 | 183/23843 | 0.199903 | 0.576454 | 0.548145 | Ankrd1/Atr  |
| GO_BP_m1GO:000690vesicle doc   | 7/2606  | 44/23843  | 0.200227 | 0.576454 | 0.548145 | Ncam1/Scf   |
| GO_BP_m1GO:003289positive re   | 7/2606  | 44/23843  | 0.200227 | 0.576454 | 0.548145 | Abat/Avpr1  |
| GO_BP_m1GO:000940response tr   | 14/2606 | 100/23843 | 0.200544 | 0.576454 | 0.548145 | Ano1/Clpb   |
| GO_BP_m1GO:004346regulation    | 14/2606 | 100/23843 | 0.200544 | 0.576454 | 0.548145 | Bnip3/Cdk1  |
| GO_BP_m1GO:006007regulation    | 14/2606 | 100/23843 | 0.200544 | 0.576454 | 0.548145 | Abat/Adora  |
| GO_BP_m1GO:002195central ner   | 28/2606 | 217/23843 | 0.201591 | 0.576454 | 0.548145 | Arx/Btg2/C  |
| GO_BP_m1GO:001656covalent ch   | 55/2606 | 449/23843 | 0.201974 | 0.576454 | 0.548145 | Apobec1/A   |
| GO_BP_m1GO:005501cardiac mu    | 13/2606 | 92/23843  | 0.202215 | 0.576454 | 0.548145 | Akap6/Cav   |
| GO_BP_m1GO:004593positive re   | 8/2606  | 52/23843  | 0.20326  | 0.576454 | 0.548145 | Abat/Adra1  |
| GO_BP_m1GO:007162regulation    | 8/2606  | 52/23843  | 0.20326  | 0.576454 | 0.548145 | Cxcl17/Kar  |
| GO_BP_m1GO:190209regulation    | 8/2606  | 52/23843  | 0.20326  | 0.576454 | 0.548145 | Cdc23/Klhl  |
| GO_BP_m1GO:190236negative re   | 8/2606  | 52/23843  | 0.20326  | 0.576454 | 0.548145 | Apobec1/N   |
| GO_BP_m1GO:004227ribosomal l   | 12/2606 | 84/23843  | 0.203593 | 0.576454 | 0.548145 | Dhx30/Ebn   |
| GO_BP_m1GO:006133renal tubul   | 12/2606 | 84/23843  | 0.203593 | 0.576454 | 0.548145 | Fgf1/Gdnf/  |
| GO_BP_m1GO:000649protein O-    | 11/2606 | 76/23843  | 0.204574 | 0.576454 | 0.548145 | A4gnt/B3g   |
| GO_BP_m1GO:004352positive re   | 11/2606 | 76/23843  | 0.204574 | 0.576454 | 0.548145 | Aifm1/Cas9  |
| GO_BP_m1GO:005127regulation    | 11/2606 | 76/23843  | 0.204574 | 0.576454 | 0.548145 | Akap6/Asp   |
| GO_BP_m1GO:006118mammary       | 11/2606 | 76/23843  | 0.204574 | 0.576454 | 0.548145 | Cav3/Epha   |
| GO_BP_m1GO:000276positive re   | 9/2606  | 60/23843  | 0.20468  | 0.576454 | 0.548145 | Casp8/Ccr1  |
| GO_BP_m1GO:001061regulation    | 9/2606  | 60/23843  | 0.20468  | 0.576454 | 0.548145 | Adk/Akap6   |
| GO_BP_m1GO:002151cell differer | 9/2606  | 60/23843  | 0.20468  | 0.576454 | 0.548145 | Dbx1/Dll4/  |
| GO_BP_m1GO:003439protein loc   | 9/2606  | 60/23843  | 0.20468  | 0.576454 | 0.548145 | Abca12/Cd   |
| GO_BP_m1GO:003590aorta devel   | 9/2606  | 60/23843  | 0.20468  | 0.576454 | 0.548145 | Adamts9/C   |
| GO_BP_m1GO:006099positive re   | 9/2606  | 60/23843  | 0.20468  | 0.576454 | 0.548145 | Caprin2/Cc  |
| GO_BP_m1GO:000300heart morp    | 33/2606 | 260/23843 | 0.204759 | 0.576454 | 0.548145 | Adamts1/A   |
| GO_BP_m1GO:000191regulation    | 5/2606  | 29/23843  | 0.204941 | 0.576454 | 0.548145 | Ache/Anxa   |
| GO_BP_m1GO:000609tricarboxyli  | 5/2606  | 29/23843  | 0.204941 | 0.576454 | 0.548145 | ldh2/ldh3a  |
| GO_BP_m1GO:000653glutamate     | 5/2606  | 29/23843  | 0.204941 | 0.576454 | 0.548145 | Dglucy/Ald  |
| GO_BP_m1GO:000922nucleotide    | 5/2606  | 29/23843  | 0.204941 | 0.576454 | 0.548145 | Csgalnact1  |
| GO_BP_m1GO:001092positive re   | 5/2606  | 29/23843  | 0.204941 | 0.576454 | 0.548145 | Akap6/Ifng  |
| GO_BP_m1GO:001404Schwann cr    | 5/2606  | 29/23843  | 0.204941 | 0.576454 | 0.548145 | Ahnak2/Cc   |
| GO_BP_m1GO:003111positive re   | 5/2606  | 29/23843  | 0.204941 | 0.576454 | 0.548145 | Ankrd53/C   |
| GO_BP_m1GO:003462cellular prc  | 5/2606  | 29/23843  | 0.204941 | 0.576454 | 0.548145 | Akap6/Exo   |
| GO_BP_m1GO:004445motile cilii  | 5/2606  | 29/23843  | 0.204941 | 0.576454 | 0.548145 | Cc2d2a/Dr   |
| GO_BP_m1GO:004518regulation    | 5/2606  | 29/23843  | 0.204941 | 0.576454 | 0.548145 | Adora1/Dr   |
| GO_BP_m1GO:004838retinoic aci  | 5/2606  | 29/23843  | 0.204941 | 0.576454 | 0.548145 | Aldh1a3/A:  |
| GO_BP_m1GO:005108chaperone     | 5/2606  | 29/23843  | 0.204941 | 0.576454 | 0.548145 | Ero1l/H2-L  |
| GO_BP_m1GO:006175leukocyte     | 5/2606  | 29/23843  | 0.204941 | 0.576454 | 0.548145 | Ccl28/Gcnt  |
| GO_BP_m1GO:007154response tr   | 5/2606  | 29/23843  | 0.204941 | 0.576454 | 0.548145 | Eif4e/Fibin |
| GO_BP_m1GO:190403positive re   | 5/2606  | 29/23843  | 0.204941 | 0.576454 | 0.548145 | Cd248/Gsn   |
| GO_BP_m1GO:000007regulation    | 10/2606 | 68/23843  | 0.205009 | 0.576454 | 0.548145 | Blm/Ccn1l/  |
| GO_BP_m1GO:003088regulation    | 10/2606 | 68/23843  | 0.205009 | 0.576454 | 0.548145 | Cdkn1a/Ctl  |

|                                     |           |          |          |          |            |
|-------------------------------------|-----------|----------|----------|----------|------------|
| GO_BP_m1GO:007037negative re10/2606 | 68/23843  | 0.205009 | 0.576454 | 0.548145 | Atf3/Camk  |
| GO_BP_m1GO:014005organelle l10/2606 | 68/23843  | 0.205009 | 0.576454 | 0.548145 | Ncam1/Nd   |
| GO_BP_m1GO:190198regulation 10/2606 | 68/23843  | 0.205009 | 0.576454 | 0.548145 | Arntl/Fam1 |
| GO_BP_m1GO:190442positive re10/2606 | 68/23843  | 0.205009 | 0.576454 | 0.548145 | Akap6/Asp  |
| GO_BP_m1GO:001972calcium-m22/2606   | 167/23843 | 0.206179 | 0.576454 | 0.548145 | Akap6/Asp  |
| GO_BP_m1GO:00344C nucleobase22/2606 | 167/23843 | 0.206179 | 0.576454 | 0.548145 | Adk/Aprt/E |
| GO_BP_m1GO:001715calcium ior16/2606 | 117/23843 | 0.206179 | 0.576454 | 0.548145 | Catsper3/C |
| GO_BP_m1GO:000011regulation 1/2606  | 2/23843   | 0.206655 | 0.576454 | 0.548145 | Esrrb      |
| GO_BP_m1GO:000029nuclear-tra1/2606  | 2/23843   | 0.206655 | 0.576454 | 0.548145 | Zc3h12a    |
| GO_BP_m1GO:000034generation 1/2606  | 2/23843   | 0.206655 | 0.576454 | 0.548145 | Prpf19     |
| GO_BP_m1GO:000045enzyme-di 1/2606   | 2/23843   | 0.206655 | 0.576454 | 0.548145 | Mrm1       |
| GO_BP_m1GO:000045enzyme-di 1/2606   | 2/23843   | 0.206655 | 0.576454 | 0.548145 | Rpusd1     |
| GO_BP_m1GO:000096positive re1/2606  | 2/23843   | 0.206655 | 0.576454 | 0.548145 | Pnpt1      |
| GO_BP_m1GO:000155ovarian foll1/2606 | 2/23843   | 0.206655 | 0.576454 | 0.548145 | Hyal3      |
| GO_BP_m1GO:000169histamine t1/2606  | 2/23843   | 0.206655 | 0.576454 | 0.548145 | Hdc        |
| GO_BP_m1GO:000192regulation 1/2606  | 2/23843   | 0.206655 | 0.576454 | 0.548145 | Ncam1      |
| GO_BP_m1GO:000198regulation 1/2606  | 2/23843   | 0.206655 | 0.576454 | 0.548145 | Manf       |
| GO_BP_m1GO:000203negative re1/2606  | 2/23843   | 0.206655 | 0.576454 | 0.548145 | Arl6ip5    |
| GO_BP_m1GO:000204intussuscep1/2606  | 2/23843   | 0.206655 | 0.576454 | 0.548145 | Lemd3      |
| GO_BP_m1GO:000218cytoplasmic1/2606  | 2/23843   | 0.206655 | 0.576454 | 0.548145 | Gspt2      |
| GO_BP_m1GO:000227basophil ac1/2606  | 2/23843   | 0.206655 | 0.576454 | 0.548145 | Kars       |
| GO_BP_m1GO:00023C CD8-positi1/2606  | 2/23843   | 0.206655 | 0.576454 | 0.548145 | lfng       |
| GO_BP_m1GO:00023C gamma-de1/2606    | 2/23843   | 0.206655 | 0.576454 | 0.548145 | Gpr18      |
| GO_BP_m1GO:00023C CD8-positi1/2606  | 2/23843   | 0.206655 | 0.576454 | 0.548145 | Gpr18      |
| GO_BP_m1GO:000239MHC prote1/2606    | 2/23843   | 0.206655 | 0.576454 | 0.548145 | Calr       |
| GO_BP_m1GO:00025C peptide an1/2606  | 2/23843   | 0.206655 | 0.576454 | 0.548145 | Calr       |
| GO_BP_m1GO:000258positive re1/2606  | 2/23843   | 0.206655 | 0.576454 | 0.548145 | Pycard     |
| GO_BP_m1GO:000258positive re1/2606  | 2/23843   | 0.206655 | 0.576454 | 0.548145 | Pycard     |
| GO_BP_m1GO:000294tRNA N2-c1/2606    | 2/23843   | 0.206655 | 0.576454 | 0.548145 | Trmt1      |
| GO_BP_m1GO:000305regulation 1/2606  | 2/23843   | 0.206655 | 0.576454 | 0.548145 | Corin      |
| GO_BP_m1GO:000329atrial septu1/2606 | 2/23843   | 0.206655 | 0.576454 | 0.548145 | Nsd2       |
| GO_BP_m1GO:000342regulation 1/2606  | 2/23843   | 0.206655 | 0.576454 | 0.548145 | Por        |
| GO_BP_m1GO:000601UDP-gluco1/2606    | 2/23843   | 0.206655 | 0.576454 | 0.548145 | Ugp2       |
| GO_BP_m1GO:000609glyoxylate r1/2606 | 2/23843   | 0.206655 | 0.576454 | 0.548145 | ldh2       |
| GO_BP_m1GO:000616adenine sa1/2606   | 2/23843   | 0.206655 | 0.576454 | 0.548145 | Aprt       |
| GO_BP_m1GO:000643tryptophan1/2606   | 2/23843   | 0.206655 | 0.576454 | 0.548145 | Wars       |
| GO_BP_m1GO:00065C N-terminal1/2606  | 2/23843   | 0.206655 | 0.576454 | 0.548145 | Map6d1     |
| GO_BP_m1GO:000655isoleucine r1/2606 | 2/23843   | 0.206655 | 0.576454 | 0.548145 | Bcat2      |
| GO_BP_m1GO:000658melanin bic1/2606  | 2/23843   | 0.206655 | 0.576454 | 0.548145 | Dct        |
| GO_BP_m1GO:000671glucocortic1/2606  | 2/23843   | 0.206655 | 0.576454 | 0.548145 | Hsd11b1    |
| GO_BP_m1GO:000678heme a bic1/2606   | 2/23843   | 0.206655 | 0.576454 | 0.548145 | Cox15      |
| GO_BP_m1GO:000685mitochond1/2606    | 2/23843   | 0.206655 | 0.576454 | 0.548145 | Mpc2       |
| GO_BP_m1GO:000686pyrimidine 1/2606  | 2/23843   | 0.206655 | 0.576454 | 0.548145 | Slc25a33   |
| GO_BP_m1GO:000698response tr1/2606  | 2/23843   | 0.206655 | 0.576454 | 0.548145 | Mgst1      |
| GO_BP_m1GO:000705spindle ass1/2606  | 2/23843   | 0.206655 | 0.576454 | 0.548145 | Fbxo5      |
| GO_BP_m1GO:000711endomitoti1/2606   | 2/23843   | 0.206655 | 0.576454 | 0.548145 | Cib1       |
| GO_BP_m1GO:000714female mei1/2606   | 2/23843   | 0.206655 | 0.576454 | 0.548145 | Mastl      |
| GO_BP_m1GO:000735zygotic spe1/2606  | 2/23843   | 0.206655 | 0.576454 | 0.548145 | Smad6      |

|          |           |              |        |         |          |          |          |         |
|----------|-----------|--------------|--------|---------|----------|----------|----------|---------|
| GO_BP_m1 | GO:000859 | regulation   | 1/2606 | 2/23843 | 0.206655 | 0.576454 | 0.548145 | Peli3   |
| GO_BP_m1 | GO:000908 | branched-r   | 1/2606 | 2/23843 | 0.206655 | 0.576454 | 0.548145 | Bcat2   |
| GO_BP_m1 | GO:000909 | leucine bio  | 1/2606 | 2/23843 | 0.206655 | 0.576454 | 0.548145 | Bcat2   |
| GO_BP_m1 | GO:000909 | valine bios  | 1/2606 | 2/23843 | 0.206655 | 0.576454 | 0.548145 | Bcat2   |
| GO_BP_m1 | GO:000915 | purine deo   | 1/2606 | 2/23843 | 0.206655 | 0.576454 | 0.548145 | Adk     |
| GO_BP_m1 | GO:000915 | deoxyribor   | 1/2606 | 2/23843 | 0.206655 | 0.576454 | 0.548145 | Dnph1   |
| GO_BP_m1 | GO:000921 | purine deo   | 1/2606 | 2/23843 | 0.206655 | 0.576454 | 0.548145 | Adk     |
| GO_BP_m1 | GO:000924 | lipid A bios | 1/2606 | 2/23843 | 0.206655 | 0.576454 | 0.548145 | Zfp593  |
| GO_BP_m1 | GO:000925 | 10-formylt   | 1/2606 | 2/23843 | 0.206655 | 0.576454 | 0.548145 | Mthfd11 |
| GO_BP_m1 | GO:000945 | gamma-an     | 1/2606 | 2/23843 | 0.206655 | 0.576454 | 0.548145 | Abat    |
| GO_BP_m1 | GO:000963 | cold acclim  | 1/2606 | 2/23843 | 0.206655 | 0.576454 | 0.548145 | Saxo1   |
| GO_BP_m1 | GO:001007 | zygote asy   | 1/2606 | 2/23843 | 0.206655 | 0.576454 | 0.548145 | Rgs14   |
| GO_BP_m1 | GO:001014 | farnesyl di  | 1/2606 | 2/23843 | 0.206655 | 0.576454 | 0.548145 | Hmgcs2  |
| GO_BP_m1 | GO:001026 | SCF compl    | 1/2606 | 2/23843 | 0.206655 | 0.576454 | 0.548145 | Cand1   |
| GO_BP_m1 | GO:001026 | response tr  | 1/2606 | 2/23843 | 0.206655 | 0.576454 | 0.548145 | Gpx1    |
| GO_BP_m1 | GO:001051 | negative re  | 1/2606 | 2/23843 | 0.206655 | 0.576454 | 0.548145 | Pdgfa   |
| GO_BP_m1 | GO:001072 | positive re  | 1/2606 | 2/23843 | 0.206655 | 0.576454 | 0.548145 | Snca    |
| GO_BP_m1 | GO:001084 | regulation   | 1/2606 | 2/23843 | 0.206655 | 0.576454 | 0.548145 | Map1s   |
| GO_BP_m1 | GO:001089 | regulation   | 1/2606 | 2/23843 | 0.206655 | 0.576454 | 0.548145 | Scarb1  |
| GO_BP_m1 | GO:001472 | regulation   | 1/2606 | 2/23843 | 0.206655 | 0.576454 | 0.548145 | Myh7    |
| GO_BP_m1 | GO:001485 | negative re  | 1/2606 | 2/23843 | 0.206655 | 0.576454 | 0.548145 | Ephb1   |
| GO_BP_m1 | GO:001486 | regulation   | 1/2606 | 2/23843 | 0.206655 | 0.576454 | 0.548145 | Myh7    |
| GO_BP_m1 | GO:001568 | intracellula | 1/2606 | 2/23843 | 0.206655 | 0.576454 | 0.548145 | Atp7b   |
| GO_BP_m1 | GO:001578 | GDP-fucos    | 1/2606 | 2/23843 | 0.206655 | 0.576454 | 0.548145 | Slc35c1 |
| GO_BP_m1 | GO:001591 | peroxisom    | 1/2606 | 2/23843 | 0.206655 | 0.576454 | 0.548145 | Abcd3   |
| GO_BP_m1 | GO:001592 | lipopolysac  | 1/2606 | 2/23843 | 0.206655 | 0.576454 | 0.548145 | Scarb1  |
| GO_BP_m1 | GO:001609 | monoterpe    | 1/2606 | 2/23843 | 0.206655 | 0.576454 | 0.548145 | Cyp2e1  |
| GO_BP_m1 | GO:001626 | selenocyst   | 1/2606 | 2/23843 | 0.206655 | 0.576454 | 0.548145 | Sephs1  |
| GO_BP_m1 | GO:001907 | viral genon  | 1/2606 | 2/23843 | 0.206655 | 0.576454 | 0.548145 | Pcx     |
| GO_BP_m1 | GO:001907 | viral RNA    | 1/2606 | 2/23843 | 0.206655 | 0.576454 | 0.548145 | Pcx     |
| GO_BP_m1 | GO:001926 | glycine bio  | 1/2606 | 2/23843 | 0.206655 | 0.576454 | 0.548145 | Shmt1   |
| GO_BP_m1 | GO:001938 | glucuronos   | 1/2606 | 2/23843 | 0.206655 | 0.576454 | 0.548145 | Abhd10  |
| GO_BP_m1 | GO:001940 | dolichol bi  | 1/2606 | 2/23843 | 0.206655 | 0.576454 | 0.548145 | Nus1    |
| GO_BP_m1 | GO:001947 | D-amino a    | 1/2606 | 2/23843 | 0.206655 | 0.576454 | 0.548145 | Ddo     |
| GO_BP_m1 | GO:001954 | arginine ca  | 1/2606 | 2/23843 | 0.206655 | 0.576454 | 0.548145 | Arg1    |
| GO_BP_m1 | GO:001955 | glutamate    | 1/2606 | 2/23843 | 0.206655 | 0.576454 | 0.548145 | Got1    |
| GO_BP_m1 | GO:001955 | glutamate    | 1/2606 | 2/23843 | 0.206655 | 0.576454 | 0.548145 | Got1    |
| GO_BP_m1 | GO:001956 | glycerol ca  | 1/2606 | 2/23843 | 0.206655 | 0.576454 | 0.548145 | Tkfc    |
| GO_BP_m1 | GO:001985 | cytosine m   | 1/2606 | 2/23843 | 0.206655 | 0.576454 | 0.548145 | Tet2    |
| GO_BP_m1 | GO:002152 | medial mo    | 1/2606 | 2/23843 | 0.206655 | 0.576454 | 0.548145 | Lhx4    |
| GO_BP_m1 | GO:002159 | fourth vent  | 1/2606 | 2/23843 | 0.206655 | 0.576454 | 0.548145 | Kdm2b   |
| GO_BP_m1 | GO:002163 | optic nerve  | 1/2606 | 2/23843 | 0.206655 | 0.576454 | 0.548145 | Kcna2   |
| GO_BP_m1 | GO:002164 | vagus nerv   | 1/2606 | 2/23843 | 0.206655 | 0.576454 | 0.548145 | Tbx1    |
| GO_BP_m1 | GO:002175 | facial nucle | 1/2606 | 2/23843 | 0.206655 | 0.576454 | 0.548145 | Hoxb1   |
| GO_BP_m1 | GO:002175 | globus pall  | 1/2606 | 2/23843 | 0.206655 | 0.576454 | 0.548145 | Arx     |
| GO_BP_m1 | GO:002178 | postganglic  | 1/2606 | 2/23843 | 0.206655 | 0.576454 | 0.548145 | Gdnf    |
| GO_BP_m1 | GO:002183 | embryonic    | 1/2606 | 2/23843 | 0.206655 | 0.576454 | 0.548145 | Arx     |
| GO_BP_m1 | GO:002184 | directional  | 1/2606 | 2/23843 | 0.206655 | 0.576454 | 0.548145 | Nrg1    |

|          |           |               |        |         |          |          |          |         |
|----------|-----------|---------------|--------|---------|----------|----------|----------|---------|
| GO_BP_m1 | GO:002184 | chemorept     | 1/2606 | 2/23843 | 0.206655 | 0.576454 | 0.548145 | Nrg1    |
| GO_BP_m1 | GO:002187 | Wnt signali   | 1/2606 | 2/23843 | 0.206655 | 0.576454 | 0.548145 | Wnt3a   |
| GO_BP_m1 | GO:002189 | forebrain a   | 1/2606 | 2/23843 | 0.206655 | 0.576454 | 0.548145 | Nf1     |
| GO_BP_m1 | GO:002189 | forebrain a   | 1/2606 | 2/23843 | 0.206655 | 0.576454 | 0.548145 | Nf1     |
| GO_BP_m1 | GO:002193 | radial glia   | 1/2606 | 2/23843 | 0.206655 | 0.576454 | 0.548145 | Cend1   |
| GO_BP_m1 | GO:002193 | cerebellar    | 1/2606 | 2/23843 | 0.206655 | 0.576454 | 0.548145 | Plxna2  |
| GO_BP_m1 | GO:002194 | negative re   | 1/2606 | 2/23843 | 0.206655 | 0.576454 | 0.548145 | Cend1   |
| GO_BP_m1 | GO:003010 | vasopressin   | 1/2606 | 2/23843 | 0.206655 | 0.576454 | 0.548145 | Trpv4   |
| GO_BP_m1 | GO:003045 | regulation    | 1/2606 | 2/23843 | 0.206655 | 0.576454 | 0.548145 | Susd4   |
| GO_BP_m1 | GO:003124 | actin rod a   | 1/2606 | 2/23843 | 0.206655 | 0.576454 | 0.548145 | Hsp90b1 |
| GO_BP_m1 | GO:003144 | regulation    | 1/2606 | 2/23843 | 0.206655 | 0.576454 | 0.548145 | Tpr     |
| GO_BP_m1 | GO:003144 | regulation    | 1/2606 | 2/23843 | 0.206655 | 0.576454 | 0.548145 | Myh7    |
| GO_BP_m1 | GO:003145 | positive re   | 1/2606 | 2/23843 | 0.206655 | 0.576454 | 0.548145 | Tpr     |
| GO_BP_m1 | GO:003155 | wybutosine    | 1/2606 | 2/23843 | 0.206655 | 0.576454 | 0.548145 | Tyw5    |
| GO_BP_m1 | GO:003155 | wybutosine    | 1/2606 | 2/23843 | 0.206655 | 0.576454 | 0.548145 | Tyw5    |
| GO_BP_m1 | GO:003199 | mRNA exp      | 1/2606 | 2/23843 | 0.206655 | 0.576454 | 0.548145 | Tpr     |
| GO_BP_m1 | GO:003207 | negative re   | 1/2606 | 2/23843 | 0.206655 | 0.576454 | 0.548145 | Dffa    |
| GO_BP_m1 | GO:003241 | negative re   | 1/2606 | 2/23843 | 0.206655 | 0.576454 | 0.548145 | Drd3    |
| GO_BP_m1 | GO:003280 | negative re   | 1/2606 | 2/23843 | 0.206655 | 0.576454 | 0.548145 | Anxa2   |
| GO_BP_m1 | GO:003280 | positive re   | 1/2606 | 2/23843 | 0.206655 | 0.576454 | 0.548145 | Pcsk9   |
| GO_BP_m1 | GO:003287 | positive re   | 1/2606 | 2/23843 | 0.206655 | 0.576454 | 0.548145 | E2f7    |
| GO_BP_m1 | GO:003319 | response to   | 1/2606 | 2/23843 | 0.206655 | 0.576454 | 0.548145 | Eif2ak2 |
| GO_BP_m1 | GO:003330 | phytol met    | 1/2606 | 2/23843 | 0.206655 | 0.576454 | 0.548145 | Pecr    |
| GO_BP_m1 | GO:003348 | nitric oxide  | 1/2606 | 2/23843 | 0.206655 | 0.576454 | 0.548145 | Cav1    |
| GO_BP_m1 | GO:003408 | establishment | 1/2606 | 2/23843 | 0.206655 | 0.576454 | 0.548145 | Naa50   |
| GO_BP_m1 | GO:003414 | toll-like rec | 1/2606 | 2/23843 | 0.206655 | 0.576454 | 0.548145 | Tlr5    |
| GO_BP_m1 | GO:003417 | toll-like rec | 1/2606 | 2/23843 | 0.206655 | 0.576454 | 0.548145 | Trem1   |
| GO_BP_m1 | GO:003441 | tRNA 3'-tr    | 1/2606 | 2/23843 | 0.206655 | 0.576454 | 0.548145 | Elac1   |
| GO_BP_m1 | GO:003497 | histone H3    | 1/2606 | 2/23843 | 0.206655 | 0.576454 | 0.548145 | Prmt6   |
| GO_BP_m1 | GO:003506 | nuclear spe   | 1/2606 | 2/23843 | 0.206655 | 0.576454 | 0.548145 | Srpk2   |
| GO_BP_m1 | GO:003512 | post-embr     | 1/2606 | 2/23843 | 0.206655 | 0.576454 | 0.548145 | Mir23a  |
| GO_BP_m1 | GO:003512 | post-embr     | 1/2606 | 2/23843 | 0.206655 | 0.576454 | 0.548145 | Mir23a  |
| GO_BP_m1 | GO:003540 | histone H3    | 1/2606 | 2/23843 | 0.206655 | 0.576454 | 0.548145 | Prkca   |
| GO_BP_m1 | GO:003550 | metanephros   | 1/2606 | 2/23843 | 0.206655 | 0.576454 | 0.548145 | Wt1     |
| GO_BP_m1 | GO:003552 | retrograde    | 1/2606 | 2/23843 | 0.206655 | 0.576454 | 0.548145 | Usp6nl  |
| GO_BP_m1 | GO:003558 | sequestering  | 1/2606 | 2/23843 | 0.206655 | 0.576454 | 0.548145 | Fbn1    |
| GO_BP_m1 | GO:003566 | TRAM-dep      | 1/2606 | 2/23843 | 0.206655 | 0.576454 | 0.548145 | Ticam2  |
| GO_BP_m1 | GO:003566 | TRAM-dep      | 1/2606 | 2/23843 | 0.206655 | 0.576454 | 0.548145 | Ticam2  |
| GO_BP_m1 | GO:003569 | CD8-positi    | 1/2606 | 2/23843 | 0.206655 | 0.576454 | 0.548145 | Ripk3   |
| GO_BP_m1 | GO:003570 | astrocyte c   | 1/2606 | 2/23843 | 0.206655 | 0.576454 | 0.548145 | Gpr183  |
| GO_BP_m1 | GO:003570 | memory T      | 1/2606 | 2/23843 | 0.206655 | 0.576454 | 0.548145 | Fam49b  |
| GO_BP_m1 | GO:003580 | adrenal cor   | 1/2606 | 2/23843 | 0.206655 | 0.576454 | 0.548145 | Wt1     |
| GO_BP_m1 | GO:003580 | adrenal cor   | 1/2606 | 2/23843 | 0.206655 | 0.576454 | 0.548145 | Wt1     |
| GO_BP_m1 | GO:003584 | oviduct epi   | 1/2606 | 2/23843 | 0.206655 | 0.576454 | 0.548145 | Cdh1    |
| GO_BP_m1 | GO:003584 | uterine epi   | 1/2606 | 2/23843 | 0.206655 | 0.576454 | 0.548145 | Cdh1    |
| GO_BP_m1 | GO:003598 | tongue mu     | 1/2606 | 2/23843 | 0.206655 | 0.576454 | 0.548145 | Tbx1    |
| GO_BP_m1 | GO:003622 | protein loc   | 1/2606 | 2/23843 | 0.206655 | 0.576454 | 0.548145 | Nup54   |
| GO_BP_m1 | GO:003632 | vascular en   | 1/2606 | 2/23843 | 0.206655 | 0.576454 | 0.548145 | Pdcd6   |

|                   |              |        |         |          |          |          |         |
|-------------------|--------------|--------|---------|----------|----------|----------|---------|
| GO_BP_m1GO:003633 | hepatocyte   | 1/2606 | 2/23843 | 0.206655 | 0.576454 | 0.548145 | Ezh1    |
| GO_BP_m1GO:003633 | epidermal    | 1/2606 | 2/23843 | 0.206655 | 0.576454 | 0.548145 | Ift88   |
| GO_BP_m1GO:003645 | cap mRNA     | 1/2606 | 2/23843 | 0.206655 | 0.576454 | 0.548145 | Cmtr2   |
| GO_BP_m1GO:003645 | neuron intr  | 1/2606 | 2/23843 | 0.206655 | 0.576454 | 0.548145 | Park2   |
| GO_BP_m1GO:003653 | trimming o   | 1/2606 | 2/23843 | 0.206655 | 0.576454 | 0.548145 | Man1b1  |
| GO_BP_m1GO:003803 | netrin-acti  | 1/2606 | 2/23843 | 0.206655 | 0.576454 | 0.548145 | Shtn1   |
| GO_BP_m1GO:003815 | granulocyt   | 1/2606 | 2/23843 | 0.206655 | 0.576454 | 0.548145 | Jagn1   |
| GO_BP_m1GO:003815 | thrombopo    | 1/2606 | 2/23843 | 0.206655 | 0.576454 | 0.548145 | Cib1    |
| GO_BP_m1GO:004212 | nitrate assi | 1/2606 | 2/23843 | 0.206655 | 0.576454 | 0.548145 | Suox    |
| GO_BP_m1GO:004225 | DNA prote    | 1/2606 | 2/23843 | 0.206655 | 0.576454 | 0.548145 | Nudt1   |
| GO_BP_m1GO:004225 | peptidyl-a   | 1/2606 | 2/23843 | 0.206655 | 0.576454 | 0.548145 | Asph    |
| GO_BP_m1GO:004232 | negative re  | 1/2606 | 2/23843 | 0.206655 | 0.576454 | 0.548145 | Adora1  |
| GO_BP_m1GO:004243 | thyroid hor  | 1/2606 | 2/23843 | 0.206655 | 0.576454 | 0.548145 | Dio2    |
| GO_BP_m1GO:004245 | arginine bir | 1/2606 | 2/23843 | 0.206655 | 0.576454 | 0.548145 | Otc     |
| GO_BP_m1GO:004253 | hypotonic    | 1/2606 | 2/23843 | 0.206655 | 0.576454 | 0.548145 | Trpv4   |
| GO_BP_m1GO:004259 | behavioral   | 1/2606 | 2/23843 | 0.206655 | 0.576454 | 0.548145 | Galp    |
| GO_BP_m1GO:004277 | tRNA 3'-tr   | 1/2606 | 2/23843 | 0.206655 | 0.576454 | 0.548145 | Elac1   |
| GO_BP_m1GO:004311 | replication  | 1/2606 | 2/23843 | 0.206655 | 0.576454 | 0.548145 | Tipin   |
| GO_BP_m1GO:004331 | positive re  | 1/2606 | 2/23843 | 0.206655 | 0.576454 | 0.548145 | Stx4a   |
| GO_BP_m1GO:004331 | negative re  | 1/2606 | 2/23843 | 0.206655 | 0.576454 | 0.548145 | Bcr     |
| GO_BP_m1GO:004337 | regulation   | 1/2606 | 2/23843 | 0.206655 | 0.576454 | 0.548145 | Nckap1l |
| GO_BP_m1GO:004363 | cellular am  | 1/2606 | 2/23843 | 0.206655 | 0.576454 | 0.548145 | Pm20d1  |
| GO_BP_m1GO:004433 | canonical v  | 1/2606 | 2/23843 | 0.206655 | 0.576454 | 0.548145 | Myc     |
| GO_BP_m1GO:004434 | canonical v  | 1/2606 | 2/23843 | 0.206655 | 0.576454 | 0.548145 | Wnt3a   |
| GO_BP_m1GO:004465 | tooth erup   | 1/2606 | 2/23843 | 0.206655 | 0.576454 | 0.548145 | Tnfsf11 |
| GO_BP_m1GO:004472 | DNA deme     | 1/2606 | 2/23843 | 0.206655 | 0.576454 | 0.548145 | Tet3    |
| GO_BP_m1GO:004475 | metaphase    | 1/2606 | 2/23843 | 0.206655 | 0.576454 | 0.548145 | Ttk     |
| GO_BP_m1GO:004503 | DNA replic   | 1/2606 | 2/23843 | 0.206655 | 0.576454 | 0.548145 | Pole    |
| GO_BP_m1GO:004521 | FasL biosyr  | 1/2606 | 2/23843 | 0.206655 | 0.576454 | 0.548145 | Jak3    |
| GO_BP_m1GO:004521 | neurotrans   | 1/2606 | 2/23843 | 0.206655 | 0.576454 | 0.548145 | Ache    |
| GO_BP_m1GO:004564 | regulation   | 1/2606 | 2/23843 | 0.206655 | 0.576454 | 0.548145 | Trib1   |
| GO_BP_m1GO:004564 | positive re  | 1/2606 | 2/23843 | 0.206655 | 0.576454 | 0.548145 | Trib1   |
| GO_BP_m1GO:004565 | negative re  | 1/2606 | 2/23843 | 0.206655 | 0.576454 | 0.548145 | Trib1   |
| GO_BP_m1GO:004575 | negative re  | 1/2606 | 2/23843 | 0.206655 | 0.576454 | 0.548145 | Peli3   |
| GO_BP_m1GO:004575 | negative re  | 1/2606 | 2/23843 | 0.206655 | 0.576454 | 0.548145 | Atp2b4  |
| GO_BP_m1GO:004605 | adenine m    | 1/2606 | 2/23843 | 0.206655 | 0.576454 | 0.548145 | Aprt    |
| GO_BP_m1GO:004605 | adenine bir  | 1/2606 | 2/23843 | 0.206655 | 0.576454 | 0.548145 | Aprt    |
| GO_BP_m1GO:004605 | adenosine    | 1/2606 | 2/23843 | 0.206655 | 0.576454 | 0.548145 | Adk     |
| GO_BP_m1GO:004615 | heme a m     | 1/2606 | 2/23843 | 0.206655 | 0.576454 | 0.548145 | Cox15   |
| GO_BP_m1GO:004649 | lipid A met  | 1/2606 | 2/23843 | 0.206655 | 0.576454 | 0.548145 | Zfp593  |
| GO_BP_m1GO:004651 | sphinganim   | 1/2606 | 2/23843 | 0.206655 | 0.576454 | 0.548145 | Sptlc2  |
| GO_BP_m1GO:004672 | negative re  | 1/2606 | 2/23843 | 0.206655 | 0.576454 | 0.548145 | Vapb    |
| GO_BP_m1GO:004807 | regulation   | 1/2606 | 2/23843 | 0.206655 | 0.576454 | 0.548145 | Spns2   |
| GO_BP_m1GO:004823 | regulation   | 1/2606 | 2/23843 | 0.206655 | 0.576454 | 0.548145 | Preb    |
| GO_BP_m1GO:004834 | paraxial m   | 1/2606 | 2/23843 | 0.206655 | 0.576454 | 0.548145 | Wnt3a   |
| GO_BP_m1GO:004834 | paraxial m   | 1/2606 | 2/23843 | 0.206655 | 0.576454 | 0.548145 | Wnt3a   |
| GO_BP_m1GO:004835 | intermedia   | 1/2606 | 2/23843 | 0.206655 | 0.576454 | 0.548145 | Osr1    |
| GO_BP_m1GO:004869 | positive re  | 1/2606 | 2/23843 | 0.206655 | 0.576454 | 0.548145 | Wnt3a   |

|                                      |         |          |          |          |         |
|--------------------------------------|---------|----------|----------|----------|---------|
| GO_BP_m1GO:004874compound 1/2606     | 2/23843 | 0.206655 | 0.576454 | 0.548145 | Abcb5   |
| GO_BP_m1GO:004886stem cell fa1/2606  | 2/23843 | 0.206655 | 0.576454 | 0.548145 | Ntf5    |
| GO_BP_m1GO:005097detection c1/2606   | 2/23843 | 0.206655 | 0.576454 | 0.548145 | Sox2    |
| GO_BP_m1GO:005103regulation 1/2606   | 2/23843 | 0.206655 | 0.576454 | 0.548145 | Zfp386  |
| GO_BP_m1GO:005145attachment1/2606    | 2/23843 | 0.206655 | 0.576454 | 0.548145 | Cenpc1  |
| GO_BP_m1GO:005159response tr1/2606   | 2/23843 | 0.206655 | 0.576454 | 0.548145 | Arsb    |
| GO_BP_m1GO:005189negative re1/2606   | 2/23843 | 0.206655 | 0.576454 | 0.548145 | Wnt3a   |
| GO_BP_m1GO:005195methotrexate1/2606  | 2/23843 | 0.206655 | 0.576454 | 0.548145 | Slc46a1 |
| GO_BP_m1GO:005507cadmium ic1/2606    | 2/23843 | 0.206655 | 0.576454 | 0.548145 | Mt3     |
| GO_BP_m1GO:00600C copper ion 1/2606  | 2/23843 | 0.206655 | 0.576454 | 0.548145 | Atp7b   |
| GO_BP_m1GO:006031negative re1/2606   | 2/23843 | 0.206655 | 0.576454 | 0.548145 | Bcr     |
| GO_BP_m1GO:006032cytoplasmic1/2606   | 2/23843 | 0.206655 | 0.576454 | 0.548145 | Shtn1   |
| GO_BP_m1GO:006037positive re1/2606   | 2/23843 | 0.206655 | 0.576454 | 0.548145 | Itgam   |
| GO_BP_m1GO:006038regulation 1/2606   | 2/23843 | 0.206655 | 0.576454 | 0.548145 | Nucks1  |
| GO_BP_m1GO:006043bronchus n1/2606    | 2/23843 | 0.206655 | 0.576454 | 0.548145 | Tulp3   |
| GO_BP_m1GO:006054positive re1/2606   | 2/23843 | 0.206655 | 0.576454 | 0.548145 | Ripk3   |
| GO_BP_m1GO:006073regulation 1/2606   | 2/23843 | 0.206655 | 0.576454 | 0.548145 | Slc22a5 |
| GO_BP_m1GO:006099cell-cell sig1/2606 | 2/23843 | 0.206655 | 0.576454 | 0.548145 | Lgr4    |
| GO_BP_m1GO:006103secretion b1/2606   | 2/23843 | 0.206655 | 0.576454 | 0.548145 | Fgf7    |
| GO_BP_m1GO:006118negative re1/2606   | 2/23843 | 0.206655 | 0.576454 | 0.548145 | Rflna   |
| GO_BP_m1GO:006119taste bud c1/2606   | 2/23843 | 0.206655 | 0.576454 | 0.548145 | Ntf5    |
| GO_BP_m1GO:006122pattern spe1/2606   | 2/23843 | 0.206655 | 0.576454 | 0.548145 | Osr1    |
| GO_BP_m1GO:006128Wnt signal1/2606    | 2/23843 | 0.206655 | 0.576454 | 0.548145 | Lgr4    |
| GO_BP_m1GO:006129canonical v1/2606   | 2/23843 | 0.206655 | 0.576454 | 0.548145 | Lgr4    |
| GO_BP_m1GO:006144endocardia1/2606    | 2/23843 | 0.206655 | 0.576454 | 0.548145 | Jag1    |
| GO_BP_m1GO:006158intestinal e1/2606  | 2/23843 | 0.206655 | 0.576454 | 0.548145 | Arsb    |
| GO_BP_m1GO:007025negative re1/2606   | 2/23843 | 0.206655 | 0.576454 | 0.548145 | Adora1  |
| GO_BP_m1GO:007031G1 to G0 tr1/2606   | 2/23843 | 0.206655 | 0.576454 | 0.548145 | Zfp503  |
| GO_BP_m1GO:007032tRNA selen1/2606    | 2/23843 | 0.206655 | 0.576454 | 0.548145 | Sephs1  |
| GO_BP_m1GO:007034brown fat c1/2606   | 2/23843 | 0.206655 | 0.576454 | 0.548145 | Fgf16   |
| GO_BP_m1GO:007034regulation 1/2606   | 2/23843 | 0.206655 | 0.576454 | 0.548145 | Fgf16   |
| GO_BP_m1GO:007042positive re1/2606   | 2/23843 | 0.206655 | 0.576454 | 0.548145 | Peli3   |
| GO_BP_m1GO:007043positive re1/2606   | 2/23843 | 0.206655 | 0.576454 | 0.548145 | Peli3   |
| GO_BP_m1GO:007058negative re1/2606   | 2/23843 | 0.206655 | 0.576454 | 0.548145 | Kank2   |
| GO_BP_m1GO:007065actin filame1/2606  | 2/23843 | 0.206655 | 0.576454 | 0.548145 | Shtn1   |
| GO_BP_m1GO:007083divalent m1/2606    | 2/23843 | 0.206655 | 0.576454 | 0.548145 | Slc40a1 |
| GO_BP_m1GO:007095regulation 1/2606   | 2/23843 | 0.206655 | 0.576454 | 0.548145 | Arg1    |
| GO_BP_m1GO:007096positive re1/2606   | 2/23843 | 0.206655 | 0.576454 | 0.548145 | Arg1    |
| GO_BP_m1GO:00711C response tr1/2606  | 2/23843 | 0.206655 | 0.576454 | 0.548145 | Jak3    |
| GO_BP_m1GO:007138cellular res1/2606  | 2/23843 | 0.206655 | 0.576454 | 0.548145 | Npas4   |
| GO_BP_m1GO:007147cellular hyp1/2606  | 2/23843 | 0.206655 | 0.576454 | 0.548145 | Trpv4   |
| GO_BP_m1GO:007159thymocyte 1/2606    | 2/23843 | 0.206655 | 0.576454 | 0.548145 | Adam8   |
| GO_BP_m1GO:007164negative re1/2606   | 2/23843 | 0.206655 | 0.576454 | 0.548145 | Mefv    |
| GO_BP_m1GO:007164positive re1/2606   | 2/23843 | 0.206655 | 0.576454 | 0.548145 | Trpv4   |
| GO_BP_m1GO:007181positive re1/2606   | 2/23843 | 0.206655 | 0.576454 | 0.548145 | Tnfsf11 |
| GO_BP_m1GO:007184positive re1/2606   | 2/23843 | 0.206655 | 0.576454 | 0.548145 | Tnfsf11 |
| GO_BP_m1GO:007187negative re1/2606   | 2/23843 | 0.206655 | 0.576454 | 0.548145 | Atp2b4  |
| GO_BP_m1GO:007191urea transr1/2606   | 2/23843 | 0.206655 | 0.576454 | 0.548145 | Slc14a2 |

|                   |                     |         |          |          |          |          |
|-------------------|---------------------|---------|----------|----------|----------|----------|
| GO_BP_m1GO:007192 | alpha-tubu1/2606    | 2/23843 | 0.206655 | 0.576454 | 0.548145 | Kat2a    |
| GO_BP_m1GO:007193 | positive re1/2606   | 2/23843 | 0.206655 | 0.576454 | 0.548145 | Esrrb    |
| GO_BP_m1GO:007202 | ascending 1/2606    | 2/23843 | 0.206655 | 0.576454 | 0.548145 | Pou3f3   |
| GO_BP_m1GO:007202 | thick ascen1/2606   | 2/23843 | 0.206655 | 0.576454 | 0.548145 | Pou3f3   |
| GO_BP_m1GO:007207 | kidney inte1/2606   | 2/23843 | 0.206655 | 0.576454 | 0.548145 | Osr1     |
| GO_BP_m1GO:007209 | anterior/pc1/2606   | 2/23843 | 0.206655 | 0.576454 | 0.548145 | Osr1     |
| GO_BP_m1GO:007214 | renal inters1/2606  | 2/23843 | 0.206655 | 0.576454 | 0.548145 | Osr1     |
| GO_BP_m1GO:007220 | cell-cell sig1/2606 | 2/23843 | 0.206655 | 0.576454 | 0.548145 | Lgr4     |
| GO_BP_m1GO:007221 | metaneph1/2606      | 2/23843 | 0.206655 | 0.576454 | 0.548145 | Pou3f3   |
| GO_BP_m1GO:007223 | metaneph1/2606      | 2/23843 | 0.206655 | 0.576454 | 0.548145 | Pou3f3   |
| GO_BP_m1GO:007224 | metaneph1/2606      | 2/23843 | 0.206655 | 0.576454 | 0.548145 | Lamb2    |
| GO_BP_m1GO:007224 | metaneph1/2606      | 2/23843 | 0.206655 | 0.576454 | 0.548145 | Lamb2    |
| GO_BP_m1GO:007227 | proximal/d1/2606    | 2/23843 | 0.206655 | 0.576454 | 0.548145 | Irx2     |
| GO_BP_m1GO:007227 | metaneph1/2606      | 2/23843 | 0.206655 | 0.576454 | 0.548145 | Wt1      |
| GO_BP_m1GO:007230 | regulation 1/2606   | 2/23843 | 0.206655 | 0.576454 | 0.548145 | Wt1      |
| GO_BP_m1GO:007231 | metaneph1/2606      | 2/23843 | 0.206655 | 0.576454 | 0.548145 | Lamb2    |
| GO_BP_m1GO:007231 | metaneph1/2606      | 2/23843 | 0.206655 | 0.576454 | 0.548145 | Lamb2    |
| GO_BP_m1GO:007255 | blood vess1/2606    | 2/23843 | 0.206655 | 0.576454 | 0.548145 | Dll4     |
| GO_BP_m1GO:007256 | blood micr1/2606    | 2/23843 | 0.206655 | 0.576454 | 0.548145 | Cd36     |
| GO_BP_m1GO:007273 | response tr1/2606   | 2/23843 | 0.206655 | 0.576454 | 0.548145 | Mapk13   |
| GO_BP_m1GO:007275 | cellular res1/2606  | 2/23843 | 0.206655 | 0.576454 | 0.548145 | Ranbp1   |
| GO_BP_m1GO:008609 | regulation 1/2606   | 2/23843 | 0.206655 | 0.576454 | 0.548145 | Slc9a1   |
| GO_BP_m1GO:008609 | angiotensir1/2606   | 2/23843 | 0.206655 | 0.576454 | 0.548145 | Cav1     |
| GO_BP_m1GO:009010 | regulation 1/2606   | 2/23843 | 0.206655 | 0.576454 | 0.548145 | Nr1h2    |
| GO_BP_m1GO:009018 | regulation 1/2606   | 2/23843 | 0.206655 | 0.576454 | 0.548145 | Nr1h2    |
| GO_BP_m1GO:009036 | positive re1/2606   | 2/23843 | 0.206655 | 0.576454 | 0.548145 | Ptgs2    |
| GO_BP_m1GO:009036 | negative re1/2606   | 2/23843 | 0.206655 | 0.576454 | 0.548145 | Hnrnpc   |
| GO_BP_m1GO:009061 | mitochond1/2606     | 2/23843 | 0.206655 | 0.576454 | 0.548145 | Pnpt1    |
| GO_BP_m1GO:009067 | endothelial1/2606   | 2/23843 | 0.206655 | 0.576454 | 0.548145 | Adamts9  |
| GO_BP_m1GO:009701 | renal prote1/2606   | 2/23843 | 0.206655 | 0.576454 | 0.548145 | Gsn      |
| GO_BP_m1GO:009708 | methyl-br1/2606     | 2/23843 | 0.206655 | 0.576454 | 0.548145 | Phyh     |
| GO_BP_m1GO:009711 | endoplasm1/2606     | 2/23843 | 0.206655 | 0.576454 | 0.548145 | Gbf1     |
| GO_BP_m1GO:009721 | positive re1/2606   | 2/23843 | 0.206655 | 0.576454 | 0.548145 | Mt3      |
| GO_BP_m1GO:009727 | ammonia t1/2606     | 2/23843 | 0.206655 | 0.576454 | 0.548145 | Otc      |
| GO_BP_m1GO:009727 | urea home1/2606     | 2/23843 | 0.206655 | 0.576454 | 0.548145 | Slc25a23 |
| GO_BP_m1GO:009730 | cap1 mRN1/2606      | 2/23843 | 0.206655 | 0.576454 | 0.548145 | Cmtr2    |
| GO_BP_m1GO:009768 | double-str1/2606    | 2/23843 | 0.206655 | 0.576454 | 0.548145 | Lig3     |
| GO_BP_m1GO:009870 | copper ion1/2606    | 2/23843 | 0.206655 | 0.576454 | 0.548145 | Slc31a1  |
| GO_BP_m1GO:009874 | cerebellar r1/2606  | 2/23843 | 0.206655 | 0.576454 | 0.548145 | Samd4b   |
| GO_BP_m1GO:009888 | modificatic1/2606   | 2/23843 | 0.206655 | 0.576454 | 0.548145 | Arhgap44 |
| GO_BP_m1GO:009896 | dendritic tr1/2606  | 2/23843 | 0.206655 | 0.576454 | 0.548145 | Stau2    |
| GO_BP_m1GO:009896 | dendritic tr1/2606  | 2/23843 | 0.206655 | 0.576454 | 0.548145 | Stau2    |
| GO_BP_m1GO:009896 | anterograd1/2606    | 2/23843 | 0.206655 | 0.576454 | 0.548145 | Stau2    |
| GO_BP_m1GO:009902 | vesicle teth1/2606  | 2/23843 | 0.206655 | 0.576454 | 0.548145 | Stard3nl |
| GO_BP_m1GO:009903 | sphingolipi1/2606   | 2/23843 | 0.206655 | 0.576454 | 0.548145 | Abcb1a   |
| GO_BP_m1GO:009904 | vesicle teth1/2606  | 2/23843 | 0.206655 | 0.576454 | 0.548145 | Stard3nl |
| GO_BP_m1GO:009908 | retrograde 1/2606   | 2/23843 | 0.206655 | 0.576454 | 0.548145 | Ntf5     |
| GO_BP_m1GO:009916 | synaptic sig1/2606  | 2/23843 | 0.206655 | 0.576454 | 0.548145 | Gucy1b1  |

|                                                           |        |         |          |          |          |          |
|-----------------------------------------------------------|--------|---------|----------|----------|----------|----------|
| GO_BP_m1GO:00994C maintenance                             | 1/2606 | 2/23843 | 0.206655 | 0.576454 | 0.548145 | Tnks     |
| GO_BP_m1GO:00994C mitotic sister chromatid segregation    | 1/2606 | 2/23843 | 0.206655 | 0.576454 | 0.548145 | Tnks     |
| GO_BP_m1GO:009954trans-synaptic transmission              | 1/2606 | 2/23843 | 0.206655 | 0.576454 | 0.548145 | Gucy1b1  |
| GO_BP_m1GO:009954trans-synaptic transmission              | 1/2606 | 2/23843 | 0.206655 | 0.576454 | 0.548145 | Gucy1b1  |
| GO_BP_m1GO:009956regulation of gene expression            | 1/2606 | 2/23843 | 0.206655 | 0.576454 | 0.548145 | Grin2b   |
| GO_BP_m1GO:014019regulation of gene expression            | 1/2606 | 2/23843 | 0.206655 | 0.576454 | 0.548145 | Atp2b4   |
| GO_BP_m1GO:190003positive regulation of gene expression   | 1/2606 | 2/23843 | 0.206655 | 0.576454 | 0.548145 | Kcnk2    |
| GO_BP_m1GO:190011positive regulation of gene expression   | 1/2606 | 2/23843 | 0.206655 | 0.576454 | 0.548145 | Dmrtc2   |
| GO_BP_m1GO:190011positive regulation of gene expression   | 1/2606 | 2/23843 | 0.206655 | 0.576454 | 0.548145 | Dmrtc2   |
| GO_BP_m1GO:190014negative regulation of gene expression   | 1/2606 | 2/23843 | 0.206655 | 0.576454 | 0.548145 | Dand5    |
| GO_BP_m1GO:190017negative regulation of gene expression   | 1/2606 | 2/23843 | 0.206655 | 0.576454 | 0.548145 | Dand5    |
| GO_BP_m1GO:190067olefin metabolism                        | 1/2606 | 2/23843 | 0.206655 | 0.576454 | 0.548145 | Ephx2    |
| GO_BP_m1GO:190075protein processing                       | 1/2606 | 2/23843 | 0.206655 | 0.576454 | 0.548145 | Gsn      |
| GO_BP_m1GO:190109regulation of gene expression            | 1/2606 | 2/23843 | 0.206655 | 0.576454 | 0.548145 | Pex5     |
| GO_BP_m1GO:190109negative regulation of gene expression   | 1/2606 | 2/23843 | 0.206655 | 0.576454 | 0.548145 | Pex5     |
| GO_BP_m1GO:190109regulation of gene expression            | 1/2606 | 2/23843 | 0.206655 | 0.576454 | 0.548145 | Pex5     |
| GO_BP_m1GO:190109negative regulation of gene expression   | 1/2606 | 2/23843 | 0.206655 | 0.576454 | 0.548145 | Pex5     |
| GO_BP_m1GO:190126lipooligosaccharide biosynthetic process | 1/2606 | 2/23843 | 0.206655 | 0.576454 | 0.548145 | Zfp593   |
| GO_BP_m1GO:190127lipooligosaccharide biosynthetic process | 1/2606 | 2/23843 | 0.206655 | 0.576454 | 0.548145 | Zfp593   |
| GO_BP_m1GO:190134response to hypoxia                      | 1/2606 | 2/23843 | 0.206655 | 0.576454 | 0.548145 | Ranbp1   |
| GO_BP_m1GO:19014Cregulation of gene expression            | 1/2606 | 2/23843 | 0.206655 | 0.576454 | 0.548145 | Clybl    |
| GO_BP_m1GO:190173regulation of gene expression            | 1/2606 | 2/23843 | 0.206655 | 0.576454 | 0.548145 | Dgat1    |
| GO_BP_m1GO:190186positive regulation of gene expression   | 1/2606 | 2/23843 | 0.206655 | 0.576454 | 0.548145 | Ppargc1a |
| GO_BP_m1GO:190189negative regulation of gene expression   | 1/2606 | 2/23843 | 0.206655 | 0.576454 | 0.548145 | Pde4b    |
| GO_BP_m1GO:19021Cregulation of gene expression            | 1/2606 | 2/23843 | 0.206655 | 0.576454 | 0.548145 | Ttk      |
| GO_BP_m1GO:19021Cnegative regulation of gene expression   | 1/2606 | 2/23843 | 0.206655 | 0.576454 | 0.548145 | Ttk      |
| GO_BP_m1GO:190225negative regulation of gene expression   | 1/2606 | 2/23843 | 0.206655 | 0.576454 | 0.548145 | Foxc1    |
| GO_BP_m1GO:190251negative regulation of gene expression   | 1/2606 | 2/23843 | 0.206655 | 0.576454 | 0.548145 | Dffa     |
| GO_BP_m1GO:190252positive regulation of gene expression   | 1/2606 | 2/23843 | 0.206655 | 0.576454 | 0.548145 | Nmi      |
| GO_BP_m1GO:190252regulation of gene expression            | 1/2606 | 2/23843 | 0.206655 | 0.576454 | 0.548145 | Park2    |
| GO_BP_m1GO:190253positive regulation of gene expression   | 1/2606 | 2/23843 | 0.206655 | 0.576454 | 0.548145 | Park2    |
| GO_BP_m1GO:190256positive regulation of gene expression   | 1/2606 | 2/23843 | 0.206655 | 0.576454 | 0.548145 | Stx4a    |
| GO_BP_m1GO:190268negative regulation of gene expression   | 1/2606 | 2/23843 | 0.206655 | 0.576454 | 0.548145 | Tigar    |
| GO_BP_m1GO:190272negative regulation of gene expression   | 1/2606 | 2/23843 | 0.206655 | 0.576454 | 0.548145 | Ephb1    |
| GO_BP_m1GO:190272negative regulation of gene expression   | 1/2606 | 2/23843 | 0.206655 | 0.576454 | 0.548145 | Ephb1    |
| GO_BP_m1GO:190276isoprenoid biosynthetic process          | 1/2606 | 2/23843 | 0.206655 | 0.576454 | 0.548145 | Hmgcs2   |
| GO_BP_m1GO:190281positive regulation of gene expression   | 1/2606 | 2/23843 | 0.206655 | 0.576454 | 0.548145 | Tbx1     |
| GO_BP_m1GO:190295regulation of gene expression            | 1/2606 | 2/23843 | 0.206655 | 0.576454 | 0.548145 | Dnajc13  |
| GO_BP_m1GO:19031Cregulation of gene expression            | 1/2606 | 2/23843 | 0.206655 | 0.576454 | 0.548145 | Sirt3    |
| GO_BP_m1GO:19031Cpositive regulation of gene expression   | 1/2606 | 2/23843 | 0.206655 | 0.576454 | 0.548145 | Sirt3    |
| GO_BP_m1GO:190317fatty acid metabolism                    | 1/2606 | 2/23843 | 0.206655 | 0.576454 | 0.548145 | Pecr     |
| GO_BP_m1GO:190328positive regulation of gene expression   | 1/2606 | 2/23843 | 0.206655 | 0.576454 | 0.548145 | Slc9a1   |
| GO_BP_m1GO:190338regulation of gene expression            | 1/2606 | 2/23843 | 0.206655 | 0.576454 | 0.548145 | Park2    |
| GO_BP_m1GO:190338negative regulation of gene expression   | 1/2606 | 2/23843 | 0.206655 | 0.576454 | 0.548145 | Park2    |
| GO_BP_m1GO:190341response to hypoxia                      | 1/2606 | 2/23843 | 0.206655 | 0.576454 | 0.548145 | Kcnmb1   |
| GO_BP_m1GO:190341cellular response to hypoxia             | 1/2606 | 2/23843 | 0.206655 | 0.576454 | 0.548145 | Kcnmb1   |
| GO_BP_m1GO:190341response to hypoxia                      | 1/2606 | 2/23843 | 0.206655 | 0.576454 | 0.548145 | Nfkb1    |
| GO_BP_m1GO:190351regulation of gene expression            | 1/2606 | 2/23843 | 0.206655 | 0.576454 | 0.548145 | Xrcc1    |



|                                 |        |         |          |          |          |          |
|---------------------------------|--------|---------|----------|----------|----------|----------|
| GO_BP_m1GO:190351positive re    | 1/2606 | 2/23843 | 0.206655 | 0.576454 | 0.548145 | Xrcc1    |
| GO_BP_m1GO:190369positive re    | 1/2606 | 2/23843 | 0.206655 | 0.576454 | 0.548145 | Rreb1    |
| GO_BP_m1GO:190387ferrous iron   | 1/2606 | 2/23843 | 0.206655 | 0.576454 | 0.548145 | Slc40a1  |
| GO_BP_m1GO:190392regulation     | 1/2606 | 2/23843 | 0.206655 | 0.576454 | 0.548145 | Gsn      |
| GO_BP_m1GO:190392positive re    | 1/2606 | 2/23843 | 0.206655 | 0.576454 | 0.548145 | Gsn      |
| GO_BP_m1GO:190402negative re    | 1/2606 | 2/23843 | 0.206655 | 0.576454 | 0.548145 | Tigar    |
| GO_BP_m1GO:190404negative re    | 1/2606 | 2/23843 | 0.206655 | 0.576454 | 0.548145 | Park2    |
| GO_BP_m1GO:190444folic acid in  | 1/2606 | 2/23843 | 0.206655 | 0.576454 | 0.548145 | Slc46a1  |
| GO_BP_m1GO:190446regulation     | 1/2606 | 2/23843 | 0.206655 | 0.576454 | 0.548145 | Idh2     |
| GO_BP_m1GO:19047Cgranulosa cell | 1/2606 | 2/23843 | 0.206655 | 0.576454 | 0.548145 | Bok      |
| GO_BP_m1GO:19047Cregulation     | 1/2606 | 2/23843 | 0.206655 | 0.576454 | 0.548145 | Bok      |
| GO_BP_m1GO:190471negative re    | 1/2606 | 2/23843 | 0.206655 | 0.576454 | 0.548145 | Snca     |
| GO_BP_m1GO:190474negative re    | 1/2606 | 2/23843 | 0.206655 | 0.576454 | 0.548145 | Tnks     |
| GO_BP_m1GO:190477response to    | 1/2606 | 2/23843 | 0.206655 | 0.576454 | 0.548145 | Ezh1     |
| GO_BP_m1GO:190481negative re    | 1/2606 | 2/23843 | 0.206655 | 0.576454 | 0.548145 | H2afy    |
| GO_BP_m1GO:190486inhibitory s   | 1/2606 | 2/23843 | 0.206655 | 0.576454 | 0.548145 | Npas4    |
| GO_BP_m1GO:190486telomerase     | 1/2606 | 2/23843 | 0.206655 | 0.576454 | 0.548145 | Atr      |
| GO_BP_m1GO:190487positive re    | 1/2606 | 2/23843 | 0.206655 | 0.576454 | 0.548145 | Cacnb2   |
| GO_BP_m1GO:190488regulation     | 1/2606 | 2/23843 | 0.206655 | 0.576454 | 0.548145 | Atr      |
| GO_BP_m1GO:190488positive re    | 1/2606 | 2/23843 | 0.206655 | 0.576454 | 0.548145 | Atr      |
| GO_BP_m1GO:190488regulation     | 1/2606 | 2/23843 | 0.206655 | 0.576454 | 0.548145 | Wnt7a    |
| GO_BP_m1GO:190489positive re    | 1/2606 | 2/23843 | 0.206655 | 0.576454 | 0.548145 | Wnt7a    |
| GO_BP_m1GO:19049Cregulation     | 1/2606 | 2/23843 | 0.206655 | 0.576454 | 0.548145 | Tnks     |
| GO_BP_m1GO:19049Cnegative re    | 1/2606 | 2/23843 | 0.206655 | 0.576454 | 0.548145 | Tnks     |
| GO_BP_m1GO:19050Cnegative re    | 1/2606 | 2/23843 | 0.206655 | 0.576454 | 0.548145 | Nog      |
| GO_BP_m1GO:190513regulation     | 1/2606 | 2/23843 | 0.206655 | 0.576454 | 0.548145 | Ttk      |
| GO_BP_m1GO:190513negative re    | 1/2606 | 2/23843 | 0.206655 | 0.576454 | 0.548145 | Ttk      |
| GO_BP_m1GO:190516protein loc    | 1/2606 | 2/23843 | 0.206655 | 0.576454 | 0.548145 | Rab34    |
| GO_BP_m1GO:190516regulation     | 1/2606 | 2/23843 | 0.206655 | 0.576454 | 0.548145 | Rab34    |
| GO_BP_m1GO:190517positive re    | 1/2606 | 2/23843 | 0.206655 | 0.576454 | 0.548145 | Rab34    |
| GO_BP_m1GO:190526endonuclea     | 1/2606 | 2/23843 | 0.206655 | 0.576454 | 0.548145 | Elac1    |
| GO_BP_m1GO:19054Cregulation     | 1/2606 | 2/23843 | 0.206655 | 0.576454 | 0.548145 | Osr1     |
| GO_BP_m1GO:19054Cnegative re    | 1/2606 | 2/23843 | 0.206655 | 0.576454 | 0.548145 | Osr1     |
| GO_BP_m1GO:19055Eregulation     | 1/2606 | 2/23843 | 0.206655 | 0.576454 | 0.548145 | Ddrgk1   |
| GO_BP_m1GO:19055Epositive re    | 1/2606 | 2/23843 | 0.206655 | 0.576454 | 0.548145 | Ddrgk1   |
| GO_BP_m1GO:190562regulation     | 1/2606 | 2/23843 | 0.206655 | 0.576454 | 0.548145 | Gch1     |
| GO_BP_m1GO:190566positive re    | 1/2606 | 2/23843 | 0.206655 | 0.576454 | 0.548145 | Calcr    |
| GO_BP_m1GO:190587regulation     | 1/2606 | 2/23843 | 0.206655 | 0.576454 | 0.548145 | Cfl1     |
| GO_BP_m1GO:190593positive re    | 1/2606 | 2/23843 | 0.206655 | 0.576454 | 0.548145 | Cib1     |
| GO_BP_m1GO:199011ribosome-bi    | 1/2606 | 2/23843 | 0.206655 | 0.576454 | 0.548145 | Nemf     |
| GO_BP_m1GO:199026peptidyl-ty    | 1/2606 | 2/23843 | 0.206655 | 0.576454 | 0.548145 | Ptpn1    |
| GO_BP_m1GO:19904Cembryonic      | 1/2606 | 2/23843 | 0.206655 | 0.576454 | 0.548145 | Pdgfa    |
| GO_BP_m1GO:199051pyrimidine     | 1/2606 | 2/23843 | 0.206655 | 0.576454 | 0.548145 | Slc25a33 |
| GO_BP_m1GO:199077matrix met     | 1/2606 | 2/23843 | 0.206655 | 0.576454 | 0.548145 | Idh2     |
| GO_BP_m1GO:19908Ecellular res   | 1/2606 | 2/23843 | 0.206655 | 0.576454 | 0.548145 | Bcar1    |
| GO_BP_m1GO:200004regulation     | 1/2606 | 2/23843 | 0.206655 | 0.576454 | 0.548145 | Wnt3a    |
| GO_BP_m1GO:200007regulation     | 1/2606 | 2/23843 | 0.206655 | 0.576454 | 0.548145 | Wnt3a    |
| GO_BP_m1GO:200012regulation     | 1/2606 | 2/23843 | 0.206655 | 0.576454 | 0.548145 | Mgll     |

|                   |              |         |           |          |          |          |            |
|-------------------|--------------|---------|-----------|----------|----------|----------|------------|
| GO_BP_m1GO:200025 | positive reg | 1/2606  | 2/23843   | 0.206655 | 0.576454 | 0.548145 | Cib1       |
| GO_BP_m1GO:200028 | regulation   | 1/2606  | 2/23843   | 0.206655 | 0.576454 | 0.548145 | Atp2b4     |
| GO_BP_m1GO:200029 | regulation   | 1/2606  | 2/23843   | 0.206655 | 0.576454 | 0.548145 | Snca       |
| GO_BP_m1GO:200033 | regulation   | 1/2606  | 2/23843   | 0.206655 | 0.576454 | 0.548145 | Nlgn3      |
| GO_BP_m1GO:200033 | regulation   | 1/2606  | 2/23843   | 0.206655 | 0.576454 | 0.548145 | Cd36       |
| GO_BP_m1GO:200033 | positive reg | 1/2606  | 2/23843   | 0.206655 | 0.576454 | 0.548145 | Cd36       |
| GO_BP_m1GO:200034 | positive reg | 1/2606  | 2/23843   | 0.206655 | 0.576454 | 0.548145 | Trpv4      |
| GO_BP_m1GO:200036 | regulation   | 1/2606  | 2/23843   | 0.206655 | 0.576454 | 0.548145 | Itgam      |
| GO_BP_m1GO:200036 | positive reg | 1/2606  | 2/23843   | 0.206655 | 0.576454 | 0.548145 | Itgam      |
| GO_BP_m1GO:200036 | regulation   | 1/2606  | 2/23843   | 0.206655 | 0.576454 | 0.548145 | Hyal3      |
| GO_BP_m1GO:200036 | positive reg | 1/2606  | 2/23843   | 0.206655 | 0.576454 | 0.548145 | Hyal3      |
| GO_BP_m1GO:200037 | positive reg | 1/2606  | 2/23843   | 0.206655 | 0.576454 | 0.548145 | Mt3        |
| GO_BP_m1GO:200045 | regulation   | 1/2606  | 2/23843   | 0.206655 | 0.576454 | 0.548145 | Ripk3      |
| GO_BP_m1GO:200045 | regulation   | 1/2606  | 2/23843   | 0.206655 | 0.576454 | 0.548145 | Gpr183     |
| GO_BP_m1GO:200047 | regulation   | 1/2606  | 2/23843   | 0.206655 | 0.576454 | 0.548145 | Ptprc      |
| GO_BP_m1GO:200047 | positive reg | 1/2606  | 2/23843   | 0.206655 | 0.576454 | 0.548145 | Ptprc      |
| GO_BP_m1GO:200056 | regulation   | 1/2606  | 2/23843   | 0.206655 | 0.576454 | 0.548145 | Fam49b     |
| GO_BP_m1GO:200056 | positive reg | 1/2606  | 2/23843   | 0.206655 | 0.576454 | 0.548145 | Fam49b     |
| GO_BP_m1GO:200070 | positive reg | 1/2606  | 2/23843   | 0.206655 | 0.576454 | 0.548145 | Prkca      |
| GO_BP_m1GO:200076 | regulation   | 1/2606  | 2/23843   | 0.206655 | 0.576454 | 0.548145 | Cfl1       |
| GO_BP_m1GO:200077 | positive reg | 1/2606  | 2/23843   | 0.206655 | 0.576454 | 0.548145 | Cfl1       |
| GO_BP_m1GO:200081 | positive reg | 1/2606  | 2/23843   | 0.206655 | 0.576454 | 0.548145 | Cfl1       |
| GO_BP_m1GO:200085 | positive reg | 1/2606  | 2/23843   | 0.206655 | 0.576454 | 0.548145 | Tac1       |
| GO_BP_m1GO:200086 | positive reg | 1/2606  | 2/23843   | 0.206655 | 0.576454 | 0.548145 | Spp1       |
| GO_BP_m1GO:200103 | regulation   | 1/2606  | 2/23843   | 0.206655 | 0.576454 | 0.548145 | Tbx1       |
| GO_BP_m1GO:200103 | positive reg | 1/2606  | 2/23843   | 0.206655 | 0.576454 | 0.548145 | Tbx1       |
| GO_BP_m1GO:200122 | regulation   | 1/2606  | 2/23843   | 0.206655 | 0.576454 | 0.548145 | Prkdc      |
| GO_BP_m1GO:200130 | lipoxin met  | 1/2606  | 2/23843   | 0.206655 | 0.576454 | 0.548145 | Alox12     |
| GO_BP_m1GO:200130 | lipoxin bio  | 1/2606  | 2/23843   | 0.206655 | 0.576454 | 0.548145 | Alox12     |
| GO_BP_m1GO:200130 | lipoxin A4   | 1/2606  | 2/23843   | 0.206655 | 0.576454 | 0.548145 | Alox12     |
| GO_BP_m1GO:200130 | lipoxin A4   | 1/2606  | 2/23843   | 0.206655 | 0.576454 | 0.548145 | Alox12     |
| GO_BP_m1GO:000914 | nucleoside   | 19/2606 | 142/23843 | 0.207063 | 0.577409 | 0.549053 | Adk/Atp5a  |
| GO_BP_m1GO:001921 | regulation   | 39/2606 | 312/23843 | 0.208426 | 0.578275 | 0.549877 | Adora1/An  |
| GO_BP_m1GO:003166 | cellular res | 28/2606 | 218/23843 | 0.208596 | 0.578275 | 0.549877 | Aoc1/Atf3/ |
| GO_BP_m1GO:000941 | response tr  | 18/2606 | 134/23843 | 0.210038 | 0.578275 | 0.549877 | Atr/Cdc25a |
| GO_BP_m1GO:001401 | regulation   | 18/2606 | 134/23843 | 0.210038 | 0.578275 | 0.549877 | Cdh2/Drd3  |
| GO_BP_m1GO:007132 | cellular res | 18/2606 | 134/23843 | 0.210038 | 0.578275 | 0.549877 | Ano1/Fkbp  |
| GO_BP_m1GO:007066 | leukocyte    | 40/2606 | 321/23843 | 0.210757 | 0.578275 | 0.549877 | Adk/Arg1/I |
| GO_BP_m1GO:000616 | purine nuc   | 33/2606 | 261/23843 | 0.211199 | 0.578275 | 0.549877 | Adcy4/Adk  |
| GO_BP_m1GO:002241 | cellular cor | 43/2606 | 347/23843 | 0.211564 | 0.578275 | 0.549877 | Aifm1/Aspl |
| GO_BP_m1GO:000018 | nuclear-tra  | 6/2606  | 37/23843  | 0.212479 | 0.578275 | 0.549877 | Gspt2/Mac  |
| GO_BP_m1GO:000300 | skeletal mu  | 6/2606  | 37/23843  | 0.212479 | 0.578275 | 0.549877 | Cav3/Chrn  |
| GO_BP_m1GO:003085 | granulocyte  | 6/2606  | 37/23843  | 0.212479 | 0.578275 | 0.549877 | Cebpe/Csf  |
| GO_BP_m1GO:004598 | positive reg | 6/2606  | 37/23843  | 0.212479 | 0.578275 | 0.549877 | Abat/Adra  |
| GO_BP_m1GO:006023 | regulation   | 6/2606  | 37/23843  | 0.212479 | 0.578275 | 0.549877 | Ankrd53/Bi |
| GO_BP_m1GO:007117 | mitotic spir | 6/2606  | 37/23843  | 0.212479 | 0.578275 | 0.549877 | Klhl22/Mac |
| GO_BP_m1GO:007182 | protein-lip  | 6/2606  | 37/23843  | 0.212479 | 0.578275 | 0.549877 | Dgat1/Mtt  |
| GO_BP_m1GO:007260 | interleukin  | 6/2606  | 37/23843  | 0.212479 | 0.578275 | 0.549877 | C1qtnf3/Hy |

|                                      |           |          |          |          |             |
|--------------------------------------|-----------|----------|----------|----------|-------------|
| GO_BP_m1GO:19021Cregulation 6/2606   | 37/23843  | 0.212479 | 0.578275 | 0.549877 | Bnip3/Bok   |
| GO_BP_m1GO:00485Embryonic 59/2606    | 486/23843 | 0.212608 | 0.578275 | 0.549877 | Adm/Aldh1   |
| GO_BP_m1GO:004864muscle org13/2606   | 93/23843  | 0.213194 | 0.578275 | 0.549877 | Ankrd1/Dll  |
| GO_BP_m1GO:00714Cellular res13/2606  | 93/23843  | 0.213194 | 0.578275 | 0.549877 | Atr/Cdc25a  |
| GO_BP_m1GO:190382organic aci13/2606  | 93/23843  | 0.213194 | 0.578275 | 0.549877 | Arl6ip5/AU  |
| GO_BP_m1GO:19050Carboxylic ;13/2606  | 93/23843  | 0.213194 | 0.578275 | 0.549877 | Arl6ip5/AU  |
| GO_BP_m1GO:19012Nucleoside 39/2606   | 313/23843 | 0.214351 | 0.578275 | 0.549877 | Adcy4/Adk   |
| GO_BP_m1GO:00071Synaptoner4/2606     | 22/23843  | 0.214458 | 0.578275 | 0.549877 | Syce2/Sycp  |
| GO_BP_m1GO:00105miRNA me 4/2606      | 22/23843  | 0.214458 | 0.578275 | 0.549877 | Khsrp/Nfkb  |
| GO_BP_m1GO:001587norepinepl4/2606    | 22/23843  | 0.214458 | 0.578275 | 0.549877 | Hrh3/P2ry1  |
| GO_BP_m1GO:003551DNA dealk4/2606     | 22/23843  | 0.214458 | 0.578275 | 0.549877 | Apobec1/T   |
| GO_BP_m1GO:004202protein ref4/2606   | 22/23843  | 0.214458 | 0.578275 | 0.549877 | Dnaja4/Hsp  |
| GO_BP_m1GO:004414negative re4/2606   | 22/23843  | 0.214458 | 0.578275 | 0.549877 | Cd36/Ifng/  |
| GO_BP_m1GO:00447EG1 DNA de4/2606     | 22/23843  | 0.214458 | 0.578275 | 0.549877 | Cdkn1a/Fb   |
| GO_BP_m1GO:004481mitotic G1/4/2606   | 22/23843  | 0.214458 | 0.578275 | 0.549877 | Cdkn1a/Fb   |
| GO_BP_m1GO:004581positive re4/2606   | 22/23843  | 0.214458 | 0.578275 | 0.549877 | Apobec1/A   |
| GO_BP_m1GO:00518mitochond 4/2606     | 22/23843  | 0.214458 | 0.578275 | 0.549877 | Alox12/Bo   |
| GO_BP_m1GO:00702Positive re4/2606    | 22/23843  | 0.214458 | 0.578275 | 0.549877 | Adam8/Il1   |
| GO_BP_m1GO:00714protein loc 4/2606   | 22/23843  | 0.214458 | 0.578275 | 0.549877 | Cdk1/Cenp   |
| GO_BP_m1GO:007147cellular hyp4/2606  | 22/23843  | 0.214458 | 0.578275 | 0.549877 | Mir7b/Mir9  |
| GO_BP_m1GO:007221regulation 4/2606   | 22/23843  | 0.214458 | 0.578275 | 0.549877 | Gdnf/Myc/   |
| GO_BP_m1GO:007227metaneph4/2606      | 22/23843  | 0.214458 | 0.578275 | 0.549877 | Gdnf/Lgr4/  |
| GO_BP_m1GO:20007regulation 4/2606    | 22/23843  | 0.214458 | 0.578275 | 0.549877 | Cpeb3/Cpe   |
| GO_BP_m1GO:00000Citruiline m2/2606   | 8/23843   | 0.214944 | 0.578275 | 0.549877 | Atp2b4/Ot   |
| GO_BP_m1GO:00000Sulfur amin2/2606    | 8/23843   | 0.214944 | 0.578275 | 0.549877 | Blmh/Mtrr   |
| GO_BP_m1GO:000151selenocyste2/2606   | 8/23843   | 0.214944 | 0.578275 | 0.549877 | Pstk/Sepse  |
| GO_BP_m1GO:000177plasma me 2/2606    | 8/23843   | 0.214944 | 0.578275 | 0.549877 | Cav3/Myof   |
| GO_BP_m1GO:00019regulation 2/2606    | 8/23843   | 0.214944 | 0.578275 | 0.549877 | Adra1d/Dro  |
| GO_BP_m1GO:00064translation:2/2606   | 8/23843   | 0.214944 | 0.578275 | 0.549877 | Pstk/Sepse  |
| GO_BP_m1GO:00069substrate-c2/2606    | 8/23843   | 0.214944 | 0.578275 | 0.549877 | Abl2/Shtn1  |
| GO_BP_m1GO:000704lysosomal l2/2606   | 8/23843   | 0.214944 | 0.578275 | 0.549877 | Atp6v0c/Pp  |
| GO_BP_m1GO:000912deoxyribor 2/2606   | 8/23843   | 0.214944 | 0.578275 | 0.549877 | Dera/Dpyd   |
| GO_BP_m1GO:000916deoxyribor 2/2606   | 8/23843   | 0.214944 | 0.578275 | 0.549877 | Dnph1/Shr   |
| GO_BP_m1GO:0009457-methylg2/2606     | 8/23843   | 0.214944 | 0.578275 | 0.549877 | Cmtr2/Rnn   |
| GO_BP_m1GO:00108regulation 2/2606    | 8/23843   | 0.214944 | 0.578275 | 0.549877 | Fkbp1b/Hr   |
| GO_BP_m1GO:001094negative re2/2606   | 8/23843   | 0.214944 | 0.578275 | 0.549877 | Dach1/Smc   |
| GO_BP_m1GO:001567copper ion 2/2606   | 8/23843   | 0.214944 | 0.578275 | 0.549877 | Atp7b/Slc3  |
| GO_BP_m1GO:001587acetylcholin2/2606  | 8/23843   | 0.214944 | 0.578275 | 0.549877 | Htr6/Tacr2  |
| GO_BP_m1GO:001587carnitine tr.2/2606 | 8/23843   | 0.214944 | 0.578275 | 0.549877 | Slc22a5/Slc |
| GO_BP_m1GO:001632female mei2/2606    | 8/23843   | 0.214944 | 0.578275 | 0.549877 | Sycp3/Ttk   |
| GO_BP_m1GO:00180protein pol2/2606    | 8/23843   | 0.214944 | 0.578275 | 0.549877 | Tpgs1/Ttl5  |
| GO_BP_m1GO:002154corpus call2/2606   | 8/23843   | 0.214944 | 0.578275 | 0.549877 | Pafah1b1/S  |
| GO_BP_m1GO:00217branchiom 2/2606     | 8/23843   | 0.214944 | 0.578275 | 0.549877 | Plxna2/Sen  |
| GO_BP_m1GO:00218cerebral co2/2606    | 8/23843   | 0.214944 | 0.578275 | 0.549877 | Arx/Rac3    |
| GO_BP_m1GO:002191smoothene2/2606     | 8/23843   | 0.214944 | 0.578275 | 0.549877 | Smo/Tulp3   |
| GO_BP_m1GO:00230CD40 sign2/2606      | 8/23843   | 0.214944 | 0.578275 | 0.549877 | Sharpin/Tn  |
| GO_BP_m1GO:003021hyaluronan2/2606    | 8/23843   | 0.214944 | 0.578275 | 0.549877 | Hyal2/Hyal  |
| GO_BP_m1GO:003111rRNA pseu 2/2606    | 8/23843   | 0.214944 | 0.578275 | 0.549877 | Nop10/Rpu   |

|                   |               |        |         |          |          |          |             |
|-------------------|---------------|--------|---------|----------|----------|----------|-------------|
| GO_BP_m1GO:003135 | regulation    | 2/2606 | 8/23843 | 0.214944 | 0.578275 | 0.549877 | Avpr1a/Ptc  |
| GO_BP_m1GO:003166 | negative re   | 2/2606 | 8/23843 | 0.214944 | 0.578275 | 0.549877 | Cactin/Trib |
| GO_BP_m1GO:003253 | regulation    | 2/2606 | 8/23843 | 0.214944 | 0.578275 | 0.549877 | Atp8b1/Fsc  |
| GO_BP_m1GO:003281 | regulation    | 2/2606 | 8/23843 | 0.214944 | 0.578275 | 0.549877 | Il12b/Ptpn2 |
| GO_BP_m1GO:003431 | primary alc   | 2/2606 | 8/23843 | 0.214944 | 0.578275 | 0.549877 | Adh1/Adh5   |
| GO_BP_m1GO:003581 | negative re   | 2/2606 | 8/23843 | 0.214944 | 0.578275 | 0.549877 | Adora1/Ut   |
| GO_BP_m1GO:003645 | IRE1-medi     | 2/2606 | 8/23843 | 0.214944 | 0.578275 | 0.549877 | Ficd/Ptpn1  |
| GO_BP_m1GO:003804 | dimeric G-    | 2/2606 | 8/23843 | 0.214944 | 0.578275 | 0.549877 | Adm/Calcr   |
| GO_BP_m1GO:004275 | snRNA trar    | 2/2606 | 8/23843 | 0.214944 | 0.578275 | 0.549877 | Ell2/Ice1   |
| GO_BP_m1GO:004317 | nucleoside    | 2/2606 | 8/23843 | 0.214944 | 0.578275 | 0.549877 | Adk/Aprt    |
| GO_BP_m1GO:004331 | regulation    | 2/2606 | 8/23843 | 0.214944 | 0.578275 | 0.549877 | Bcr/Itgam   |
| GO_BP_m1GO:004361 | astrocyte c   | 2/2606 | 8/23843 | 0.214944 | 0.578275 | 0.549877 | Arhgef7/Gp  |
| GO_BP_m1GO:004363 | polyadenyl    | 2/2606 | 8/23843 | 0.214944 | 0.578275 | 0.549877 | Exosc9/Pnp  |
| GO_BP_m1GO:004482 | positive re   | 2/2606 | 8/23843 | 0.214944 | 0.578275 | 0.549877 | Nucks1/Va   |
| GO_BP_m1GO:004502 | G0 to G1 tr   | 2/2606 | 8/23843 | 0.214944 | 0.578275 | 0.549877 | Ctgf/Orc1   |
| GO_BP_m1GO:004534 | positive re   | 2/2606 | 8/23843 | 0.214944 | 0.578275 | 0.549877 | lfng/Il10   |
| GO_BP_m1GO:004606 | dATP meta     | 2/2606 | 8/23843 | 0.214944 | 0.578275 | 0.549877 | Adk/Nudt1   |
| GO_BP_m1GO:004645 | S-adenosy     | 2/2606 | 8/23843 | 0.214944 | 0.578275 | 0.549877 | Ahcyl2/Mtr  |
| GO_BP_m1GO:004695 | nonassocia    | 2/2606 | 8/23843 | 0.214944 | 0.578275 | 0.549877 | Drd5/Grin2  |
| GO_BP_m1GO:004824 | epinephrin    | 2/2606 | 8/23843 | 0.214944 | 0.578275 | 0.549877 | Cartpt/Ly6c |
| GO_BP_m1GO:004853 | bone marr     | 2/2606 | 8/23843 | 0.214944 | 0.578275 | 0.549877 | Asxl1/Ptprc |
| GO_BP_m1GO:004875 | pronephro:    | 2/2606 | 8/23843 | 0.214944 | 0.578275 | 0.549877 | Osr1/Osr2   |
| GO_BP_m1GO:005113 | regulation    | 2/2606 | 8/23843 | 0.214944 | 0.578275 | 0.549877 | Hsph1/Il12  |
| GO_BP_m1GO:006033 | negative re   | 2/2606 | 8/23843 | 0.214944 | 0.578275 | 0.549877 | Cactin/Mm   |
| GO_BP_m1GO:006092 | cardiac mu    | 2/2606 | 8/23843 | 0.214944 | 0.578275 | 0.549877 | Wnt3a/Wnt   |
| GO_BP_m1GO:006100 | negative re   | 2/2606 | 8/23843 | 0.214944 | 0.578275 | 0.549877 | Dnm3/Nlgn   |
| GO_BP_m1GO:006165 | detoxificati  | 2/2606 | 8/23843 | 0.214944 | 0.578275 | 0.549877 | Mt2/Mt3     |
| GO_BP_m1GO:006173 | mitochond     | 2/2606 | 8/23843 | 0.214944 | 0.578275 | 0.549877 | Mpc2/Pdhl   |
| GO_BP_m1GO:007031 | regulation    | 2/2606 | 8/23843 | 0.214944 | 0.578275 | 0.549877 | Ctgf/Orc1   |
| GO_BP_m1GO:007126 | L-methioni    | 2/2606 | 8/23843 | 0.214944 | 0.578275 | 0.549877 | Apip/Enop   |
| GO_BP_m1GO:007160 | chemokine     | 2/2606 | 8/23843 | 0.214944 | 0.578275 | 0.549877 | Ticam2/Trp  |
| GO_BP_m1GO:009004 | regulation    | 2/2606 | 8/23843 | 0.214944 | 0.578275 | 0.549877 | Fnta/Nek3   |
| GO_BP_m1GO:009016 | Golgi to lys  | 2/2606 | 8/23843 | 0.214944 | 0.578275 | 0.549877 | Ankfy1/Rbs  |
| GO_BP_m1GO:009711 | AMPA glut     | 2/2606 | 8/23843 | 0.214944 | 0.578275 | 0.549877 | Lrrtm4/Ssh  |
| GO_BP_m1GO:009715 | positive re   | 2/2606 | 8/23843 | 0.214944 | 0.578275 | 0.549877 | Abat/Nlgn3  |
| GO_BP_m1GO:009735 | cellular lipi | 2/2606 | 8/23843 | 0.214944 | 0.578275 | 0.549877 | Fasn/Fdft1  |
| GO_BP_m1GO:009870 | neurotrans    | 2/2606 | 8/23843 | 0.214944 | 0.578275 | 0.549877 | Slc18a2/Th  |
| GO_BP_m1GO:009955 | trans-syna    | 2/2606 | 8/23843 | 0.214944 | 0.578275 | 0.549877 | Gucy1b1/N   |
| GO_BP_m1GO:010607 | negative re   | 2/2606 | 8/23843 | 0.214944 | 0.578275 | 0.549877 | Atp2b4/Opc  |
| GO_BP_m1GO:190012 | regulation    | 2/2606 | 8/23843 | 0.214944 | 0.578275 | 0.549877 | Has2/Nfkb   |
| GO_BP_m1GO:190137 | acetate est   | 2/2606 | 8/23843 | 0.214944 | 0.578275 | 0.549877 | Htr6/Tacr2  |
| GO_BP_m1GO:190164 | nucleoside    | 2/2606 | 8/23843 | 0.214944 | 0.578275 | 0.549877 | Slc29a3/Slc |
| GO_BP_m1GO:190203 | regulation    | 2/2606 | 8/23843 | 0.214944 | 0.578275 | 0.549877 | Eif2ak2/Fox |
| GO_BP_m1GO:190371 | regulation    | 2/2606 | 8/23843 | 0.214944 | 0.578275 | 0.549877 | Bnip3/Trpv  |
| GO_BP_m1GO:190474 | negative re   | 2/2606 | 8/23843 | 0.214944 | 0.578275 | 0.549877 | Foxc1/Wt1   |
| GO_BP_m1GO:199031 | cellular res  | 2/2606 | 8/23843 | 0.214944 | 0.578275 | 0.549877 | Cfl1/Slc25a |
| GO_BP_m1GO:200077 | positive re   | 2/2606 | 8/23843 | 0.214944 | 0.578275 | 0.549877 | Mb21d1/Yj   |
| GO_BP_m1GO:200080 | regulation    | 2/2606 | 8/23843 | 0.214944 | 0.578275 | 0.549877 | Cdh2/Nlgn   |

|                   |                      |           |          |          |          |             |
|-------------------|----------------------|-----------|----------|----------|----------|-------------|
| GO_BP_m1GO:200084 | positive reç2/2606   | 8/23843   | 0.214944 | 0.578275 | 0.549877 | Galr1/Tac1  |
| GO_BP_m1GO:200126 | positive reç2/2606   | 8/23843   | 0.214944 | 0.578275 | 0.549877 | Gsn/Tfap4   |
| GO_BP_m1GO:200127 | regulation 2/2606    | 8/23843   | 0.214944 | 0.578275 | 0.549877 | Avpr1a/Ptc  |
| GO_BP_m1GO:000717 | transmemt42/2606     | 339/23843 | 0.215151 | 0.578486 | 0.550078 | Bmp3/Cav1   |
| GO_BP_m1GO:006041 | muscle tiss 12/2606  | 85/23843  | 0.215154 | 0.578486 | 0.550078 | Ankrd1/Dll  |
| GO_BP_m1GO:200005 | regulation 19/2606   | 143/23843 | 0.215921 | 0.580113 | 0.551624 | Arih2/Bcap  |
| GO_BP_m1GO:000666 | sphingolipi 16/2606  | 118/23843 | 0.215957 | 0.580113 | 0.551624 | Acer3/Asaf  |
| GO_BP_m1GO:005072 | positive reç16/2606  | 118/23843 | 0.215957 | 0.580113 | 0.551624 | Adam8/Ao    |
| GO_BP_m1GO:003019 | collagen fik7/2606   | 45/23843  | 0.216409 | 0.580261 | 0.551766 | Anxa2/Col   |
| GO_BP_m1GO:003301 | tetrapyrrol7/2606    | 45/23843  | 0.216409 | 0.580261 | 0.551766 | Clybl/Cox1  |
| GO_BP_m1GO:004590 | positive reç7/2606   | 45/23843  | 0.216409 | 0.580261 | 0.551766 | Adra1d/Alc  |
| GO_BP_m1GO:006032 | head morp7/2606      | 45/23843  | 0.216409 | 0.580261 | 0.551766 | Asph/Crisp  |
| GO_BP_m1GO:190044 | regulation 7/2606    | 45/23843  | 0.216409 | 0.580261 | 0.551766 | Cacng5/Ca   |
| GO_BP_m1GO:190179 | negative re7/2606    | 45/23843  | 0.216409 | 0.580261 | 0.551766 | N4bp1/Og    |
| GO_BP_m1GO:007149 | cellular res35/2606  | 279/23843 | 0.216746 | 0.580412 | 0.551909 | Ankrd1/Ao   |
| GO_BP_m1GO:003577 | insulin secr 11/2606 | 77/23843  | 0.216795 | 0.580412 | 0.551909 | Ano1/Fkbp   |
| GO_BP_m1GO:005178 | positive reç11/2606  | 77/23843  | 0.216795 | 0.580412 | 0.551909 | Cxcr5/Drd3  |
| GO_BP_m1GO:009063 | activation c11/2606  | 77/23843  | 0.216795 | 0.580412 | 0.551909 | Bcas3/Docl  |
| GO_BP_m1GO:190331 | negative re11/2606   | 77/23843  | 0.216795 | 0.580412 | 0.551909 | Apobec1/N   |
| GO_BP_m1GO:012003 | plasma me 59/2606    | 487/23843 | 0.217393 | 0.581626 | 0.553063 | Abl2/Arhge  |
| GO_BP_m1GO:006019 | regulation 10/2606   | 69/23843  | 0.217988 | 0.581626 | 0.553063 | Abl2/Adcy   |
| GO_BP_m1GO:006067 | ureteric bu 10/2606  | 69/23843  | 0.217988 | 0.581626 | 0.553063 | Fgf1/Gdnf/  |
| GO_BP_m1GO:006117 | regulation 10/2606   | 69/23843  | 0.217988 | 0.581626 | 0.553063 | Ano1/Fkbp   |
| GO_BP_m1GO:005501 | ventricular 8/2606   | 53/23843  | 0.21817  | 0.581626 | 0.553063 | Dll4/Foxc1/ |
| GO_BP_m1GO:000322 | ventricular 9/2606   | 61/23843  | 0.218542 | 0.581626 | 0.553063 | Adamts9/C   |
| GO_BP_m1GO:001017 | body morp9/2606      | 61/23843  | 0.218542 | 0.581626 | 0.553063 | Asph/Crisp  |
| GO_BP_m1GO:001067 | positive reç9/2606   | 61/23843  | 0.218542 | 0.581626 | 0.553063 | Adcyap1r1.  |
| GO_BP_m1GO:004338 | positive reç9/2606   | 61/23843  | 0.218542 | 0.581626 | 0.553063 | Ddrgk1/Fo   |
| GO_BP_m1GO:009058 | regulation 9/2606    | 61/23843  | 0.218542 | 0.581626 | 0.553063 | Bnip3/Bok/  |
| GO_BP_m1GO:190280 | negative re9/2606    | 61/23843  | 0.218542 | 0.581626 | 0.553063 | Cdkn1a/E2   |
| GO_BP_m1GO:190437 | positive reç9/2606   | 61/23843  | 0.218542 | 0.581626 | 0.553063 | Cib1/Epb4:  |
| GO_BP_m1GO:200125 | positive reç9/2606   | 61/23843  | 0.218542 | 0.581626 | 0.553063 | Akap6/Asp   |
| GO_BP_m1GO:000858 | female gor 15/2606   | 110/23843 | 0.218863 | 0.581626 | 0.553063 | Ccdc182/A   |
| GO_BP_m1GO:005126 | protein deç15/2606   | 110/23843 | 0.218863 | 0.581626 | 0.553063 | Asph/Cfl1/  |
| GO_BP_m1GO:009009 | negative re15/2606   | 110/23843 | 0.218863 | 0.581626 | 0.553063 | Cav1/Cdh1   |
| GO_BP_m1GO:003268 | regulation 18/2606   | 135/23843 | 0.21924  | 0.581626 | 0.553063 | Cactin/Ccl4 |
| GO_BP_m1GO:005092 | positive reç18/2606  | 135/23843 | 0.21924  | 0.581626 | 0.553063 | Calr/Ccl4/C |
| GO_BP_m1GO:009730 | response tr18/2606   | 135/23843 | 0.21924  | 0.581626 | 0.553063 | Abat/Adh1   |
| GO_BP_m1GO:003134 | negative re25/2606   | 194/23843 | 0.219386 | 0.581626 | 0.553063 | Aatk/Cdk5/  |
| GO_BP_m1GO:006082 | regulation 27/2606   | 211/23843 | 0.219437 | 0.581626 | 0.553063 | Arntl/Capri |
| GO_BP_m1GO:005070 | regulation 54/2606   | 444/23843 | 0.220218 | 0.581626 | 0.553063 | Abat/Abl2/  |
| GO_BP_m1GO:000007 | DNA replic 3/2606    | 15/23843  | 0.220891 | 0.581626 | 0.553063 | Rad9b/Tipi  |
| GO_BP_m1GO:000668 | sphingomy 3/2606     | 15/23843  | 0.220891 | 0.581626 | 0.553063 | Smpd2/Sm    |
| GO_BP_m1GO:000689 | Golgi to va 3/2606   | 15/23843  | 0.220891 | 0.581626 | 0.553063 | Ankfy1/Rbs  |
| GO_BP_m1GO:000699 | nuclear poi3/2606    | 15/23843  | 0.220891 | 0.581626 | 0.553063 | Ahctf1/Nuq  |
| GO_BP_m1GO:000827 | sulfate tran3/2606   | 15/23843  | 0.220891 | 0.581626 | 0.553063 | Racgap1/S   |
| GO_BP_m1GO:001088 | negative re3/2606    | 15/23843  | 0.220891 | 0.581626 | 0.553063 | Nr1h2/Osb   |
| GO_BP_m1GO:001093 | macrophaç3/2606      | 15/23843  | 0.220891 | 0.581626 | 0.553063 | Cd36/Gprc   |

|                                         |         |           |          |          |          |             |
|-----------------------------------------|---------|-----------|----------|----------|----------|-------------|
| GO_BP_m1GO:001591peroxisome             | 3/2606  | 15/23843  | 0.220891 | 0.581626 | 0.553063 | Pex10/Pex1  |
| GO_BP_m1GO:003027maintenance            | 3/2606  | 15/23843  | 0.220891 | 0.581626 | 0.553063 | 5730559C1   |
| GO_BP_m1GO:003469response to            | 3/2606  | 15/23843  | 0.220891 | 0.581626 | 0.553063 | Epha8/Ppa   |
| GO_BP_m1GO:003558G-protein              | 3/2606  | 15/23843  | 0.220891 | 0.581626 | 0.553063 | Acpp/Ador   |
| GO_BP_m1GO:004235vitamin D              | 3/2606  | 15/23843  | 0.220891 | 0.581626 | 0.553063 | Cyp24a1/lf  |
| GO_BP_m1GO:004241dopamine               | 3/2606  | 15/23843  | 0.220891 | 0.581626 | 0.553063 | Gch1/Snca   |
| GO_BP_m1GO:004514meiotic telomere       | 3/2606  | 15/23843  | 0.220891 | 0.581626 | 0.553063 | Terb1/Lem   |
| GO_BP_m1GO:004577negative regulation of | 3/2606  | 15/23843  | 0.220891 | 0.581626 | 0.553063 | Cartpt/Cldr |
| GO_BP_m1GO:004611nucleobase             | 3/2606  | 15/23843  | 0.220891 | 0.581626 | 0.553063 | Aprt/Mthfc  |
| GO_BP_m1GO:004651sphingoid              | 3/2606  | 15/23843  | 0.220891 | 0.581626 | 0.553063 | Acer3/Asaf  |
| GO_BP_m1GO:004838regulation of          | 3/2606  | 15/23843  | 0.220891 | 0.581626 | 0.553063 | Aldh1a3/A:  |
| GO_BP_m1GO:006015phospholipid           | 3/2606  | 15/23843  | 0.220891 | 0.581626 | 0.553063 | Adra1d/Dri  |
| GO_BP_m1GO:006057intestinal             | 3/2606  | 15/23843  | 0.220891 | 0.581626 | 0.553063 | Cdh1/Gsdr   |
| GO_BP_m1GO:006100negative regulation of | 3/2606  | 15/23843  | 0.220891 | 0.581626 | 0.553063 | Dnm3/Hda    |
| GO_BP_m1GO:006102eyelid development     | 3/2606  | 15/23843  | 0.220891 | 0.581626 | 0.553063 | Hdac1/Hda   |
| GO_BP_m1GO:007107regulation of          | 3/2606  | 15/23843  | 0.220891 | 0.581626 | 0.553063 | Fpr2/Pcx/P  |
| GO_BP_m1GO:007207kidney mesoderm        | 3/2606  | 15/23843  | 0.220891 | 0.581626 | 0.553063 | Myc/Osr1/   |
| GO_BP_m1GO:007249embryonic              | 3/2606  | 15/23843  | 0.220891 | 0.581626 | 0.553063 | Nog/Osr1/   |
| GO_BP_m1GO:009005negative regulation of | 3/2606  | 15/23843  | 0.220891 | 0.581626 | 0.553063 | Dil4/Itgb1k |
| GO_BP_m1GO:009705type B paneth cell     | 3/2606  | 15/23843  | 0.220891 | 0.581626 | 0.553063 | Hdac1/Psr   |
| GO_BP_m1GO:009728hepatocyte             | 3/2606  | 15/23843  | 0.220891 | 0.581626 | 0.553063 | Casp8/Gsn   |
| GO_BP_m1GO:190003regulation of          | 3/2606  | 15/23843  | 0.220891 | 0.581626 | 0.553063 | Chchd2/Kc   |
| GO_BP_m1GO:190045regulation of          | 3/2606  | 15/23843  | 0.220891 | 0.581626 | 0.553063 | Adora1/Frr  |
| GO_BP_m1GO:190339negative regulation of | 3/2606  | 15/23843  | 0.220891 | 0.581626 | 0.553063 | Bcas3/Itgb: |
| GO_BP_m1GO:199000amyloid fibrin         | 3/2606  | 15/23843  | 0.220891 | 0.581626 | 0.553063 | Cd36/Gsn/   |
| GO_BP_m1GO:200047regulation of          | 3/2606  | 15/23843  | 0.220891 | 0.581626 | 0.553063 | Akap6/Atp   |
| GO_BP_m1GO:000915purine ribosylation    | 32/2606 | 254/23843 | 0.221533 | 0.582529 | 0.553922 | Adcy4/Adr   |
| GO_BP_m1GO:004854response to            | 32/2606 | 254/23843 | 0.221533 | 0.582529 | 0.553922 | Adh1/Alpl/  |
| GO_BP_m1GO:000165ureteric bud           | 14/2606 | 102/23843 | 0.221698 | 0.582529 | 0.553922 | Fgf1/Foxc1  |
| GO_BP_m1GO:006132renal tubule           | 14/2606 | 102/23843 | 0.221698 | 0.582529 | 0.553922 | Fgf1/Gdnf/  |
| GO_BP_m1GO:007216mesonephros            | 14/2606 | 102/23843 | 0.221698 | 0.582529 | 0.553922 | Fgf1/Foxc1  |
| GO_BP_m1GO:007216mesonephros            | 14/2606 | 102/23843 | 0.221698 | 0.582529 | 0.553922 | Fgf1/Foxc1  |
| GO_BP_m1GO:190401epithelial cell        | 14/2606 | 102/23843 | 0.221698 | 0.582529 | 0.553922 | Abl2/Bok/C  |
| GO_BP_m1GO:009030nucleic acid           | 17/2606 | 127/23843 | 0.222582 | 0.584677 | 0.555964 | Aifm1/Bms   |
| GO_BP_m1GO:003051regulation of          | 13/2606 | 94/23843  | 0.224423 | 0.58916  | 0.560227 | Cav1/Danc   |
| GO_BP_m1GO:190210negative regulation of | 13/2606 | 94/23843  | 0.224423 | 0.58916  | 0.560227 | Cartpt/Cldr |
| GO_BP_m1GO:001993second-messenger       | 41/2606 | 332/23843 | 0.224731 | 0.589792 | 0.560828 | Adcyap1r1.  |
| GO_BP_m1GO:003564exploratory            | 5/2606  | 30/23843  | 0.225461 | 0.591003 | 0.561979 | Abat/Abl2/  |
| GO_BP_m1GO:004592negative regulation of | 5/2606  | 30/23843  | 0.225461 | 0.591003 | 0.561979 | Bcr/Fmr1/F  |
| GO_BP_m1GO:005080circadian              | 5/2606  | 30/23843  | 0.225461 | 0.591003 | 0.561979 | Adora1/Dri  |
| GO_BP_m1GO:190589positive regulation of | 5/2606  | 30/23843  | 0.225461 | 0.591003 | 0.561979 | Bcap31/Bo   |
| GO_BP_m1GO:000820cholesterol            | 16/2606 | 119/23843 | 0.225937 | 0.59172  | 0.562661 | Angptl3/Cy  |
| GO_BP_m1GO:004682regulation of          | 16/2606 | 119/23843 | 0.225937 | 0.59172  | 0.562661 | Cdk1/Cdk5   |
| GO_BP_m1GO:005192positive regulation of | 16/2606 | 119/23843 | 0.225937 | 0.59172  | 0.562661 | Adcyap1r1.  |
| GO_BP_m1GO:004856embryonic              | 39/2606 | 315/23843 | 0.226448 | 0.592883 | 0.563767 | Aldh1a3/Al  |
| GO_BP_m1GO:003260chemokine              | 12/2606 | 86/23843  | 0.226984 | 0.594034 | 0.564862 | C1qtnf3/Eit |
| GO_BP_m1GO:005079regulation of          | 23/2606 | 178/23843 | 0.227023 | 0.594034 | 0.564862 | Ccl4/Cfl1/E |
| GO_BP_m1GO:001657histone modification   | 53/2606 | 437/23843 | 0.229045 | 0.599145 | 0.569721 | Ash2l/Asxl: |

|                               |         |           |          |          |          |              |
|-------------------------------|---------|-----------|----------|----------|----------|--------------|
| GO_BP_m1GO:000863intrinsic ap | 15/2606 | 111/23843 | 0.229288 | 0.599297 | 0.569867 | Bok/Cdkn1    |
| GO_BP_m1GO:004254response tr  | 15/2606 | 111/23843 | 0.229288 | 0.599297 | 0.569867 | Aptx/Bnip3   |
| GO_BP_m1GO:005196regulation   | 11/2606 | 78/23843  | 0.229308 | 0.599297 | 0.569867 | Adora1/Ad    |
| GO_BP_m1GO:000820steroid me   | 35/2606 | 281/23843 | 0.229655 | 0.599849 | 0.570392 | Adm/Akr1c    |
| GO_BP_m1GO:000941response tr  | 35/2606 | 281/23843 | 0.229655 | 0.599849 | 0.570392 | Abl2/Adar    |
| GO_BP_m1GO:001839peptidyl-ly  | 20/2606 | 153/23843 | 0.2302   | 0.600914 | 0.571404 | Brpf3/Nat8   |
| GO_BP_m1GO:004689regulation   | 20/2606 | 153/23843 | 0.2302   | 0.600914 | 0.571404 | Avpr1a/Ccr   |
| GO_BP_m1GO:001607rRNA meta    | 28/2606 | 221/23843 | 0.230308 | 0.601019 | 0.571504 | Bms1/Cd3e    |
| GO_BP_m1GO:000323cardiac atr  | 6/2606  | 38/23843  | 0.230787 | 0.601376 | 0.571843 | Cfc1/Dand    |
| GO_BP_m1GO:003081regulation   | 6/2606  | 38/23843  | 0.230787 | 0.601376 | 0.571843 | Esrrb/Myc/   |
| GO_BP_m1GO:004584negative re  | 6/2606  | 38/23843  | 0.230787 | 0.601376 | 0.571843 | Klh22/Mac    |
| GO_BP_m1GO:004879calcium ior  | 6/2606  | 38/23843  | 0.230787 | 0.601376 | 0.571843 | Rims3/Rph    |
| GO_BP_m1GO:200040regulation   | 6/2606  | 38/23843  | 0.230787 | 0.601376 | 0.571843 | Adam8/Ccl    |
| GO_BP_m1GO:000989negative re  | 33/2606 | 264/23843 | 0.231104 | 0.601778 | 0.572225 | Adora1/An    |
| GO_BP_m1GO:004470multi-mult   | 24/2606 | 187/23843 | 0.231176 | 0.601778 | 0.572225 | Arhgdib/Ar   |
| GO_BP_m1GO:004211macrophag    | 10/2606 | 70/23843  | 0.231284 | 0.601778 | 0.572225 | Cd200/Fpr3   |
| GO_BP_m1GO:004545bone resor   | 10/2606 | 70/23843  | 0.231284 | 0.601778 | 0.572225 | Adam8/Cal    |
| GO_BP_m1GO:004884artery mor   | 10/2606 | 70/23843  | 0.231284 | 0.601778 | 0.572225 | Adamts9/A    |
| GO_BP_m1GO:000150skeletal sys | 59/2606 | 490/23843 | 0.232076 | 0.603181 | 0.57356  | Abi1/Alpl/A  |
| GO_BP_m1GO:004688regulation   | 36/2606 | 290/23843 | 0.232116 | 0.603181 | 0.57356  | Abat/Adora   |
| GO_BP_m1GO:004566negative re  | 31/2606 | 247/23843 | 0.232411 | 0.603181 | 0.57356  | Aatk/Calr/C  |
| GO_BP_m1GO:000204sprouting e  | 14/2606 | 103/23843 | 0.232616 | 0.603181 | 0.57356  | Adamts9/A    |
| GO_BP_m1GO:003264regulation   | 14/2606 | 103/23843 | 0.232616 | 0.603181 | 0.57356  | Abl2/Fam4    |
| GO_BP_m1GO:004663alpha-beta   | 14/2606 | 103/23843 | 0.232616 | 0.603181 | 0.57356  | Abl2/Blm/C   |
| GO_BP_m1GO:001474regulation   | 9/2606  | 62/23843  | 0.232754 | 0.603181 | 0.57356  | Adk/Akap6    |
| GO_BP_m1GO:004244pigment m    | 9/2606  | 62/23843  | 0.232754 | 0.603181 | 0.57356  | Aprt/Cox15   |
| GO_BP_m1GO:190367regulation   | 9/2606  | 62/23843  | 0.232754 | 0.603181 | 0.57356  | Adamts9/C    |
| GO_BP_m1GO:000152retinoid me  | 7/2606  | 46/23843  | 0.233041 | 0.603181 | 0.57356  | Adh1/Adh5    |
| GO_BP_m1GO:000906aspartate f  | 7/2606  | 46/23843  | 0.233041 | 0.603181 | 0.57356  | Adss/Ahcy1   |
| GO_BP_m1GO:003411heterotypic  | 7/2606  | 46/23843  | 0.233041 | 0.603181 | 0.57356  | Gcnt2/Il10/  |
| GO_BP_m1GO:004302T cell hom   | 7/2606  | 46/23843  | 0.233041 | 0.603181 | 0.57356  | Gpam/Gpr     |
| GO_BP_m1GO:005143regulation   | 7/2606  | 46/23843  | 0.233041 | 0.603181 | 0.57356  | Arrdc4/Cdc   |
| GO_BP_m1GO:005148regulation   | 7/2606  | 46/23843  | 0.233041 | 0.603181 | 0.57356  | Bcas3/Dnr    |
| GO_BP_m1GO:009010cochlea de   | 7/2606  | 46/23843  | 0.233041 | 0.603181 | 0.57356  | Cdh1/Cthrc   |
| GO_BP_m1GO:200122regulation   | 7/2606  | 46/23843  | 0.233041 | 0.603181 | 0.57356  | Cdh1/Fbxo    |
| GO_BP_m1GO:001604cell growth  | 60/2606 | 499/23843 | 0.233308 | 0.603181 | 0.57356  | Aatk/Adipc   |
| GO_BP_m1GO:000270negative re  | 8/2606  | 54/23843  | 0.233472 | 0.603181 | 0.57356  | Arg1/Bcr/C   |
| GO_BP_m1GO:000283positive re  | 8/2606  | 54/23843  | 0.233472 | 0.603181 | 0.57356  | Arg1/Ddx6    |
| GO_BP_m1GO:001052positive re  | 8/2606  | 54/23843  | 0.233472 | 0.603181 | 0.57356  | Adcyap1r1.   |
| GO_BP_m1GO:004507negative re  | 8/2606  | 54/23843  | 0.233472 | 0.603181 | 0.57356  | Eif2ak2/Ifit |
| GO_BP_m1GO:004617polyol bios  | 8/2606  | 54/23843  | 0.233472 | 0.603181 | 0.57356  | Acer3/Adcy   |
| GO_BP_m1GO:004826positive re  | 8/2606  | 54/23843  | 0.233472 | 0.603181 | 0.57356  | Anxa2/Cd6    |
| GO_BP_m1GO:003560protein de   | 13/2606 | 95/23843  | 0.23589  | 0.608891 | 0.578989 | BC004004/    |
| GO_BP_m1GO:004684bone remo    | 13/2606 | 95/23843  | 0.23589  | 0.608891 | 0.578989 | Adam8/Cal    |
| GO_BP_m1GO:006105somite dev   | 13/2606 | 95/23843  | 0.23589  | 0.608891 | 0.578989 | Abi1/Foxa2   |
| GO_BP_m1GO:001092regulation   | 16/2606 | 120/23843 | 0.236109 | 0.609278 | 0.579357 | 2810408A1    |
| GO_BP_m1GO:003294mononucle    | 38/2606 | 308/23843 | 0.236714 | 0.610659 | 0.58067  | Adk/Arg1/I   |
| GO_BP_m1GO:006007canonical v  | 33/2606 | 265/23843 | 0.237927 | 0.612358 | 0.582286 | Arntl/Capri  |

|                   |                         |         |           |          |          |          |             |
|-------------------|-------------------------|---------|-----------|----------|----------|----------|-------------|
| GO_BP_m1GO:000912 | purine nucleoside       | 18/2606 | 137/23843 | 0.238165 | 0.612358 | 0.582286 | Adss/Atp5a  |
| GO_BP_m1GO:000916 | purine riboside         | 18/2606 | 137/23843 | 0.238165 | 0.612358 | 0.582286 | Adss/Atp5a  |
| GO_BP_m1GO:003264 | tumor necrosis factor   | 18/2606 | 137/23843 | 0.238165 | 0.612358 | 0.582286 | Cactin/Ccl4 |
| GO_BP_m1GO:000271 | negative regulation of  | 4/2606  | 23/23843  | 0.238836 | 0.612358 | 0.582286 | Arg1/Il10/J |
| GO_BP_m1GO:000629 | mismatch repair         | 4/2606  | 23/23843  | 0.238836 | 0.612358 | 0.582286 | Msh3/Msh6   |
| GO_BP_m1GO:002301 | signal transduction     | 4/2606  | 23/23843  | 0.238836 | 0.612358 | 0.582286 | Dand5/Fox   |
| GO_BP_m1GO:00302C | chondroitin sulfate     | 4/2606  | 23/23843  | 0.238836 | 0.612358 | 0.582286 | Chst13/Csc  |
| GO_BP_m1GO:003209 | regulation of           | 4/2606  | 23/23843  | 0.238836 | 0.612358 | 0.582286 | Bbs2/Cartp  |
| GO_BP_m1GO:00341C | negative regulation of  | 4/2606  | 23/23843  | 0.238836 | 0.612358 | 0.582286 | Bcr/Cartpt/ |
| GO_BP_m1GO:003431 | diol metabolism         | 4/2606  | 23/23843  | 0.238836 | 0.612358 | 0.582286 | Acer3/Asaf  |
| GO_BP_m1GO:00358C | regulation of           | 4/2606  | 23/23843  | 0.238836 | 0.612358 | 0.582286 | Adm/Ednrk   |
| GO_BP_m1GO:004309 | cellular metabolism     | 4/2606  | 23/23843  | 0.238836 | 0.612358 | 0.582286 | Adk/Apip/   |
| GO_BP_m1GO:004357 | regulation of           | 4/2606  | 23/23843  | 0.238836 | 0.612358 | 0.582286 | Adora1/Gls  |
| GO_BP_m1GO:004414 | modulation of           | 4/2606  | 23/23843  | 0.238836 | 0.612358 | 0.582286 | Cd36/Ifng/  |
| GO_BP_m1GO:004659 | negative regulation of  | 4/2606  | 23/23843  | 0.238836 | 0.612358 | 0.582286 | Gsn/Ifitm2/ |
| GO_BP_m1GO:005196 | regulation of           | 4/2606  | 23/23843  | 0.238836 | 0.612358 | 0.582286 | Avpr1a/Car  |
| GO_BP_m1GO:006097 | left/right patterning   | 4/2606  | 23/23843  | 0.238836 | 0.612358 | 0.582286 | Dnaaf1/Ift1 |
| GO_BP_m1GO:007116 | protein localization    | 4/2606  | 23/23843  | 0.238836 | 0.612358 | 0.582286 | H2afy/Hda   |
| GO_BP_m1GO:00722C | metanephros             | 4/2606  | 23/23843  | 0.238836 | 0.612358 | 0.582286 | Lamb2/Lgr   |
| GO_BP_m1GO:190367 | negative regulation of  | 4/2606  | 23/23843  | 0.238836 | 0.612358 | 0.582286 | Adamts9/C   |
| GO_BP_m1GO:004649 | organophosphate         | 24/2606 | 188/23843 | 0.23932  | 0.61342  | 0.583296 | Angptl3/Bp  |
| GO_BP_m1GO:001619 | endosomal transport     | 22/2606 | 171/23843 | 0.239536 | 0.613614 | 0.583481 | Ankfy1/Arf  |
| GO_BP_m1GO:00305C | BMP signaling           | 22/2606 | 171/23843 | 0.239536 | 0.613614 | 0.583481 | Bmp3/Cav1   |
| GO_BP_m1GO:000315 | endothelium             | 15/2606 | 112/23843 | 0.239916 | 0.614409 | 0.584236 | Alox12/Cld  |
| GO_BP_m1GO:004217 | regulation of           | 43/2606 | 352/23843 | 0.240595 | 0.615968 | 0.585718 | Adam8/An    |
| GO_BP_m1GO:003009 | myeloid cell            | 47/2606 | 387/23843 | 0.241651 | 0.61836  | 0.587994 | Abi1/Adam   |
| GO_BP_m1GO:003261 | interleukin             | 11/2606 | 79/23843  | 0.242093 | 0.61836  | 0.587994 | 5730559C1   |
| GO_BP_m1GO:00341C | regulation of           | 11/2606 | 79/23843  | 0.242093 | 0.61836  | 0.587994 | Adam8/Bcr   |
| GO_BP_m1GO:00345C | protein localization    | 11/2606 | 79/23843  | 0.242093 | 0.61836  | 0.587994 | Atr/Cdk1/C  |
| GO_BP_m1GO:003809 | signal transduction     | 11/2606 | 79/23843  | 0.242093 | 0.61836  | 0.587994 | Bok/ErbB3/  |
| GO_BP_m1GO:00441C | cellular amino acid     | 11/2606 | 79/23843  | 0.242093 | 0.61836  | 0.587994 | Abat/Agma   |
| GO_BP_m1GO:009719 | extrinsic apoptosis     | 11/2606 | 79/23843  | 0.242093 | 0.61836  | 0.587994 | Bok/ErbB3/  |
| GO_BP_m1GO:190186 | positive regulation of  | 11/2606 | 79/23843  | 0.242093 | 0.61836  | 0.587994 | Akap6/Arn   |
| GO_BP_m1GO:007147 | cellular respiration    | 19/2606 | 146/23843 | 0.243488 | 0.621744 | 0.591211 | Atr/Blm/Cc  |
| GO_BP_m1GO:000913 | nucleoside              | 14/2606 | 104/23843 | 0.243747 | 0.622224 | 0.591667 | Bpgm/Eno    |
| GO_BP_m1GO:003254 | mitochondrial           | 10/2606 | 71/23843  | 0.244876 | 0.623365 | 0.592752 | Gfm1/Mrpl   |
| GO_BP_m1GO:004336 | CD4-positive            | 10/2606 | 71/23843  | 0.244876 | 0.623365 | 0.592752 | Gpr183/Ifn  |
| GO_BP_m1GO:005076 | negative regulation of  | 39/2606 | 318/23843 | 0.245188 | 0.623365 | 0.592752 | Aatk/Calr/C |
| GO_BP_m1GO:000269 | negative regulation of  | 16/2606 | 121/23843 | 0.246465 | 0.623365 | 0.592752 | Arg1/Bcr/C  |
| GO_BP_m1GO:000829 | isoprenoid              | 5/2606  | 31/23843  | 0.246552 | 0.623365 | 0.592752 | Aldh1a3/Fc  |
| GO_BP_m1GO:001827 | protein N-glycosylation | 5/2606  | 31/23843  | 0.246552 | 0.623365 | 0.592752 | Fut8/St3ga  |
| GO_BP_m1GO:003274 | positive regulation of  | 5/2606  | 31/23843  | 0.246552 | 0.623365 | 0.592752 | Abl2/Btnl2/ |
| GO_BP_m1GO:004274 | regulation of           | 5/2606  | 31/23843  | 0.246552 | 0.623365 | 0.592752 | Adora1/Dro  |
| GO_BP_m1GO:004324 | positive regulation of  | 5/2606  | 31/23843  | 0.246552 | 0.623365 | 0.592752 | Bnip3/Cfl1/ |
| GO_BP_m1GO:005116 | vitamin transport       | 5/2606  | 31/23843  | 0.246552 | 0.623365 | 0.592752 | Folr2/Gif/S |
| GO_BP_m1GO:005149 | positive regulation of  | 5/2606  | 31/23843  | 0.246552 | 0.623365 | 0.592752 | Bcas3/Dnr   |
| GO_BP_m1GO:20004C | positive regulation of  | 5/2606  | 31/23843  | 0.246552 | 0.623365 | 0.592752 | Adam8/Ccl   |
| GO_BP_m1GO:003164 | regulation of           | 31/2606 | 249/23843 | 0.246666 | 0.623365 | 0.592752 | Aptx/Asph   |



|                   |               |         |           |          |          |          |              |
|-------------------|---------------|---------|-----------|----------|----------|----------|--------------|
| GO_BP_m1GO:00099  | cell-cell rec | 9/2606  | 63/23843  | 0.24729  | 0.623365 | 0.592752 | Cct3/Dock1   |
| GO_BP_m1GO:00062  | regulation    | 13/2606 | 96/23843  | 0.247582 | 0.623365 | 0.592752 | Blm/Baban    |
| GO_BP_m1GO:005077 | positive re   | 13/2606 | 96/23843  | 0.247582 | 0.623365 | 0.592752 | Ache/Cdk1    |
| GO_BP_m1GO:00609  | kidney mor    | 13/2606 | 96/23843  | 0.247582 | 0.623365 | 0.592752 | Fgf1/Gcnt1   |
| GO_BP_m1GO:00987  | macromole     | 13/2606 | 96/23843  | 0.247582 | 0.623365 | 0.592752 | BC004004/    |
| GO_BP_m1GO:00015  | action pote   | 18/2606 | 138/23843 | 0.247874 | 0.623365 | 0.592752 | Cacnb2/Ca    |
| GO_BP_m1GO:000167 | cellular glu  | 18/2606 | 138/23843 | 0.247874 | 0.623365 | 0.592752 | Ano1/Cart    |
| GO_BP_m1GO:19019  | negative re   | 18/2606 | 138/23843 | 0.247874 | 0.623365 | 0.592752 | Blm/Ccng1    |
| GO_BP_m1GO:00199  | cyclic-nucl   | 20/2606 | 155/23843 | 0.248374 | 0.623365 | 0.592752 | Adcyap1r1.   |
| GO_BP_m1GO:00070  | metaphase     | 8/2606  | 55/23843  | 0.249133 | 0.623365 | 0.592752 | Cdc23/Klhl   |
| GO_BP_m1GO:003081 | regulation    | 8/2606  | 55/23843  | 0.249133 | 0.623365 | 0.592752 | Adra1d/Ak    |
| GO_BP_m1GO:004574 | negative re   | 8/2606  | 55/23843  | 0.249133 | 0.623365 | 0.592752 | Adm/Atp2l    |
| GO_BP_m1GO:00018  | receptor re   | 6/2606  | 39/23843  | 0.249568 | 0.623365 | 0.592752 | Ache/Anxa    |
| GO_BP_m1GO:004274 | hydrogen r    | 6/2606  | 39/23843  | 0.249568 | 0.623365 | 0.592752 | Duoxa2/Gp    |
| GO_BP_m1GO:00435  | regulation    | 6/2606  | 39/23843  | 0.249568 | 0.623365 | 0.592752 | Epha8/Fpr    |
| GO_BP_m1GO:004474 | protein tra   | 6/2606  | 39/23843  | 0.249568 | 0.623365 | 0.592752 | Grpel1/Pex   |
| GO_BP_m1GO:004574 | positive re   | 6/2606  | 39/23843  | 0.249568 | 0.623365 | 0.592752 | Dil4/Enho    |
| GO_BP_m1GO:00508  | regulation    | 6/2606  | 39/23843  | 0.249568 | 0.623365 | 0.592752 | Btnl2/Dusp   |
| GO_BP_m1GO:00970  | energy hor    | 6/2606  | 39/23843  | 0.249568 | 0.623365 | 0.592752 | Cd36/Fcor    |
| GO_BP_m1GO:19021  | negative re   | 6/2606  | 39/23843  | 0.249568 | 0.623365 | 0.592752 | Klhl22/Mac   |
| GO_BP_m1GO:190317 | negative re   | 6/2606  | 39/23843  | 0.249568 | 0.623365 | 0.592752 | Adra1d/Fkl   |
| GO_BP_m1GO:200081 | negative re   | 6/2606  | 39/23843  | 0.249568 | 0.623365 | 0.592752 | Klhl22/Mac   |
| GO_BP_m1GO:00215  | neural tub    | 7/2606  | 47/23843  | 0.250079 | 0.623365 | 0.592752 | Foxa2/Kdrr   |
| GO_BP_m1GO:00308  | positive re   | 7/2606  | 47/23843  | 0.250079 | 0.623365 | 0.592752 | Cdkn1a/Gp    |
| GO_BP_m1GO:004801 | inositol ph   | 7/2606  | 47/23843  | 0.250079 | 0.623365 | 0.592752 | Akap6/Atp    |
| GO_BP_m1GO:00484  | autonomic     | 7/2606  | 47/23843  | 0.250079 | 0.623365 | 0.592752 | Ednrb/Gdn    |
| GO_BP_m1GO:004871 | regulation    | 7/2606  | 47/23843  | 0.250079 | 0.623365 | 0.592752 | Drd3/Enpp    |
| GO_BP_m1GO:00996  | regulation    | 7/2606  | 47/23843  | 0.250079 | 0.623365 | 0.592752 | Cacng5/Ca    |
| GO_BP_m1GO:00086  | apoptotic r   | 15/2606 | 113/23843 | 0.250736 | 0.623365 | 0.592752 | Aifm1/Aifm   |
| GO_BP_m1GO:00329  | protein-co    | 25/2606 | 198/23843 | 0.251211 | 0.623365 | 0.592752 | Asph/Bnip    |
| GO_BP_m1GO:00420  | T cell prolif | 25/2606 | 198/23843 | 0.251211 | 0.623365 | 0.592752 | Adk/Arg1/l   |
| GO_BP_m1GO:00335  | carbohydr     | 30/2606 | 241/23843 | 0.251228 | 0.623365 | 0.592752 | Adipor2/Ar   |
| GO_BP_m1GO:00425  | glucose ho    | 30/2606 | 241/23843 | 0.251228 | 0.623365 | 0.592752 | Adipor2/Ar   |
| GO_BP_m1GO:00000  | sulfur amin   | 3/2606  | 16/23843  | 0.251344 | 0.623365 | 0.592752 | Apip/Enop    |
| GO_BP_m1GO:00020  | G-protein     | 3/2606  | 16/23843  | 0.251344 | 0.623365 | 0.592752 | Adm/Drd3.    |
| GO_BP_m1GO:00022  | neutrophil    | 3/2606  | 16/23843  | 0.251344 | 0.623365 | 0.592752 | Anxa3/Bcr    |
| GO_BP_m1GO:00063  | regulation    | 3/2606  | 16/23843  | 0.251344 | 0.623365 | 0.592752 | Foxa2/Ice1   |
| GO_BP_m1GO:00068  | mitochond     | 3/2606  | 16/23843  | 0.251344 | 0.623365 | 0.592752 | Micu2/Slc2   |
| GO_BP_m1GO:000907 | serine fami   | 3/2606  | 16/23843  | 0.251344 | 0.623365 | 0.592752 | Psph/Seph    |
| GO_BP_m1GO:001052 | regulation    | 3/2606  | 16/23843  | 0.251344 | 0.623365 | 0.592752 | Btbd18/Dd    |
| GO_BP_m1GO:001052 | negative re   | 3/2606  | 16/23843  | 0.251344 | 0.623365 | 0.592752 | Btbd18/Dd    |
| GO_BP_m1GO:00105  | regulation    | 3/2606  | 16/23843  | 0.251344 | 0.623365 | 0.592752 | Coq3/Dgkc    |
| GO_BP_m1GO:001091 | regulation    | 3/2606  | 16/23843  | 0.251344 | 0.623365 | 0.592752 | Adcyap1r1.   |
| GO_BP_m1GO:00169  | cell wall m   | 3/2606  | 16/23843  | 0.251344 | 0.623365 | 0.592752 | 1700016D     |
| GO_BP_m1GO:00327  | negative re   | 3/2606  | 16/23843  | 0.251344 | 0.623365 | 0.592752 | lfng/Il12b/l |
| GO_BP_m1GO:00336  | positive re   | 3/2606  | 16/23843  | 0.251344 | 0.623365 | 0.592752 | Cib1/Ncka    |
| GO_BP_m1GO:00352  | ionotropic    | 3/2606  | 16/23843  | 0.251344 | 0.623365 | 0.592752 | Camk2a/Cf    |
| GO_BP_m1GO:003572 | response tr   | 3/2606  | 16/23843  | 0.251344 | 0.623365 | 0.592752 | Bcar1/Gab    |

|                                      |           |          |          |          |              |
|--------------------------------------|-----------|----------|----------|----------|--------------|
| GO_BP_m1GO:004001negative re3/2606   | 16/23843  | 0.251344 | 0.623365 | 0.592752 | Bbs2/H19/    |
| GO_BP_m1GO:004392positive re3/2606   | 16/23843  | 0.251344 | 0.623365 | 0.592752 | Nucks1/Tat   |
| GO_BP_m1GO:004406regulation 3/2606   | 16/23843  | 0.251344 | 0.623365 | 0.592752 | Adora1/Glc   |
| GO_BP_m1GO:004406modulator3/2606     | 16/23843  | 0.251344 | 0.623365 | 0.592752 | Park2/Vapt   |
| GO_BP_m1GO:004589regulation 3/2606   | 16/23843  | 0.251344 | 0.623365 | 0.592752 | Cand1/Psr    |
| GO_BP_m1GO:004662gamma-de3/2606      | 16/23843  | 0.251344 | 0.623365 | 0.592752 | Gpr18/Nck    |
| GO_BP_m1GO:004683regulation 3/2606   | 16/23843  | 0.251344 | 0.623365 | 0.592752 | Nup153/Rk    |
| GO_BP_m1GO:004830regulation 3/2606   | 16/23843  | 0.251344 | 0.623365 | 0.592752 | lfng/Il27ra/ |
| GO_BP_m1GO:004887chemical h3/2606    | 16/23843  | 0.251344 | 0.623365 | 0.592752 | Abca12/Fg    |
| GO_BP_m1GO:006004negative re3/2606   | 16/23843  | 0.251344 | 0.623365 | 0.592752 | Hdac2/Kcn    |
| GO_BP_m1GO:006057ventral spir3/2606  | 16/23843  | 0.251344 | 0.623365 | 0.592752 | Dbx1/Dll4/   |
| GO_BP_m1GO:006058cell fate co3/2606  | 16/23843  | 0.251344 | 0.623365 | 0.592752 | Dbx1/Dll4/   |
| GO_BP_m1GO:007057negative re3/2606   | 16/23843  | 0.251344 | 0.623365 | 0.592752 | Klk8/Map4    |
| GO_BP_m1GO:007136cellular res3/2606  | 16/23843  | 0.251344 | 0.623365 | 0.592752 | Cav1/Mb2:    |
| GO_BP_m1GO:009019regulation 3/2606   | 16/23843  | 0.251344 | 0.623365 | 0.592752 | lfng/Nog/V   |
| GO_BP_m1GO:009022chromosom3/2606     | 16/23843  | 0.251344 | 0.623365 | 0.592752 | Terb1/Lem    |
| GO_BP_m1GO:009917presynapse3/2606    | 16/23843  | 0.251344 | 0.623365 | 0.592752 | Lrp4/Nlgn3   |
| GO_BP_m1GO:190015regulation 3/2606   | 16/23843  | 0.251344 | 0.623365 | 0.592752 | Btg2/Cpeb    |
| GO_BP_m1GO:190015positive re3/2606   | 16/23843  | 0.251344 | 0.623365 | 0.592752 | Btg2/Cpeb    |
| GO_BP_m1GO:190271regulation 3/2606   | 16/23843  | 0.251344 | 0.623365 | 0.592752 | Abl2/Ptpn2   |
| GO_BP_m1GO:190466regulation 3/2606   | 16/23843  | 0.251344 | 0.623365 | 0.592752 | Cdc20/Fbx    |
| GO_BP_m1GO:200010negative re3/2606   | 16/23843  | 0.251344 | 0.623365 | 0.592752 | Fbxo18/Lig   |
| GO_BP_m1GO:200072negative re3/2606   | 16/23843  | 0.251344 | 0.623365 | 0.592752 | Cav3/Pak1,   |
| GO_BP_m1GO:200117negative re3/2606   | 16/23843  | 0.251344 | 0.623365 | 0.592752 | Fln/Pparg    |
| GO_BP_m1GO:004847oogenesis 12/2606   | 88/23843  | 0.251391 | 0.623365 | 0.592752 | Amh/Dmrt     |
| GO_BP_m1GO:190260proton trar12/2606  | 88/23843  | 0.251391 | 0.623365 | 0.592752 | Atp5a1/Atf   |
| GO_BP_m1GO:000155regulation 50/2606  | 415/23843 | 0.251879 | 0.623365 | 0.592752 | Aatk/Adipc   |
| GO_BP_m1GO:004206gliogenesis36/2606  | 293/23843 | 0.251918 | 0.623365 | 0.592752 | Abl2/Ahnaf   |
| GO_BP_m1GO:003030negative re23/2606  | 181/23843 | 0.252236 | 0.623365 | 0.592752 | Aatk/Adipc   |
| GO_BP_m1GO:004877tissue remc23/2606  | 181/23843 | 0.252236 | 0.623365 | 0.592752 | Adam8/Bcr    |
| GO_BP_m1GO:001612sterol metc17/2606  | 130/23843 | 0.252376 | 0.623365 | 0.592752 | Angptl3/Cy   |
| GO_BP_m1GO:190186regulation 21/2606  | 164/23843 | 0.252873 | 0.623365 | 0.592752 | Akap6/Arn    |
| GO_BP_m1GO:000912nucleoside 19/2606  | 147/23843 | 0.252987 | 0.623365 | 0.592752 | Adss/Atp5c   |
| GO_BP_m1GO:190121negative re28/2606  | 224/23843 | 0.253002 | 0.623365 | 0.592752 | Adam8/Bo     |
| GO_BP_m1GO:003505embryonic 11/2606   | 80/23843  | 0.255132 | 0.623365 | 0.592752 | Cfc1/Dnaaf   |
| GO_BP_m1GO:007030cellular res11/2606 | 80/23843  | 0.255132 | 0.623365 | 0.592752 | Bnip3/Cfl1,  |
| GO_BP_m1GO:001097positive re41/2606  | 337/23843 | 0.255374 | 0.623365 | 0.592752 | Abl2/Ache,   |
| GO_BP_m1GO:005110regulation 16/2606  | 122/23843 | 0.256996 | 0.623365 | 0.592752 | Ddrgk1/E2    |
| GO_BP_m1GO:000024spliceosom2/2606    | 9/23843   | 0.257455 | 0.623365 | 0.592752 | Prpf19/Prp   |
| GO_BP_m1GO:000049box C/D sn2/2606    | 9/23843   | 0.257455 | 0.623365 | 0.592752 | Gm3086/Tc    |
| GO_BP_m1GO:000157gangliosidc2/2606   | 9/23843   | 0.257455 | 0.623365 | 0.592752 | St6galnac1   |
| GO_BP_m1GO:000167regulation 2/2606   | 9/23843   | 0.257455 | 0.623365 | 0.592752 | Map1s/Tpr    |
| GO_BP_m1GO:000183neural plat2/2606   | 9/23843   | 0.257455 | 0.623365 | 0.592752 | Nog/Zfp56    |
| GO_BP_m1GO:000272negative re2/2606   | 9/23843   | 0.257455 | 0.623365 | 0.592752 | Arg1/Smac    |
| GO_BP_m1GO:000314determinat2/2606    | 9/23843   | 0.257455 | 0.623365 | 0.592752 | Dand5/Sm     |
| GO_BP_m1GO:000656proline me2/2606    | 9/23843   | 0.257455 | 0.623365 | 0.592752 | Aldh4a1/Py   |
| GO_BP_m1GO:000656L-serine m2/2606    | 9/23843   | 0.257455 | 0.623365 | 0.592752 | Psph/Shmt    |
| GO_BP_m1GO:000719adenylate c2/2606   | 9/23843   | 0.257455 | 0.623365 | 0.592752 | Drd3/Drd5    |

|                                      |         |          |          |          |             |
|--------------------------------------|---------|----------|----------|----------|-------------|
| GO_BP_m1GO:000821spermidine2/2606    | 9/23843 | 0.257455 | 0.623365 | 0.592752 | Agmat/Sat   |
| GO_BP_m1GO:000835germ cell n2/2606   | 9/23843 | 0.257455 | 0.623365 | 0.592752 | Dmrt1/Foxo  |
| GO_BP_m1GO:001063regulation 2/2606   | 9/23843 | 0.257455 | 0.623365 | 0.592752 | Bnip3/Park  |
| GO_BP_m1GO:001087positive reç2/2606  | 9/23843 | 0.257455 | 0.623365 | 0.592752 | Hdac1/Hda   |
| GO_BP_m1GO:001579polyol tran2/2606   | 9/23843 | 0.257455 | 0.623365 | 0.592752 | Pgap1/Slc5  |
| GO_BP_m1GO:001924lactate bioç2/2606  | 9/23843 | 0.257455 | 0.623365 | 0.592752 | Ldha/Tigar  |
| GO_BP_m1GO:001937lipoxygena 2/2606   | 9/23843 | 0.257455 | 0.623365 | 0.592752 | Alox12/Alo  |
| GO_BP_m1GO:001951peptidyl-pi2/2606   | 9/23843 | 0.257455 | 0.623365 | 0.592752 | Egln3/Ogfc  |
| GO_BP_m1GO:002183interneuror2/2606   | 9/23843 | 0.257455 | 0.623365 | 0.592752 | Arx/Nrg1    |
| GO_BP_m1GO:002187forebrain n2/2606   | 9/23843 | 0.257455 | 0.623365 | 0.592752 | Dct/Wnt3a   |
| GO_BP_m1GO:00302Cchondroitir2/2606   | 9/23843 | 0.257455 | 0.623365 | 0.592752 | Chst13/Csc  |
| GO_BP_m1GO:00303Cpoly-N-acç2/2606    | 9/23843 | 0.257455 | 0.623365 | 0.592752 | B3gnt3/B3ç  |
| GO_BP_m1GO:003031poly-N-acç2/2606    | 9/23843 | 0.257455 | 0.623365 | 0.592752 | B3gnt3/B3ç  |
| GO_BP_m1GO:003162positive reç2/2606  | 9/23843 | 0.257455 | 0.623365 | 0.592752 | Ptgs2/Tnfsi |
| GO_BP_m1GO:003164negative re2/2606   | 9/23843 | 0.257455 | 0.623365 | 0.592752 | lfng/Klk8   |
| GO_BP_m1GO:003207regulation 2/2606   | 9/23843 | 0.257455 | 0.623365 | 0.592752 | Dffa/Pcna   |
| GO_BP_m1GO:003247negative re2/2606   | 9/23843 | 0.257455 | 0.623365 | 0.592752 | Bcap31/Ra   |
| GO_BP_m1GO:00328Eglomerular 2/2606   | 9/23843 | 0.257455 | 0.623365 | 0.592752 | Lamb2/Wt:   |
| GO_BP_m1GO:00336Cpositive reç2/2606  | 9/23843 | 0.257455 | 0.623365 | 0.592752 | Rreb1/Zfp7  |
| GO_BP_m1GO:003413regulation 2/2606   | 9/23843 | 0.257455 | 0.623365 | 0.592752 | Cav1/Ptpn:  |
| GO_BP_m1GO:003497protein folk2/2606  | 9/23843 | 0.257455 | 0.623365 | 0.592752 | Emc3/Ero1   |
| GO_BP_m1GO:003523ectopic ger2/2606   | 9/23843 | 0.257455 | 0.623365 | 0.592752 | Kitl/Prkdc  |
| GO_BP_m1GO:003552monoubiqi2/2606     | 9/23843 | 0.257455 | 0.623365 | 0.592752 | Asxl1/Usp7  |
| GO_BP_m1GO:003554regulation 2/2606   | 9/23843 | 0.257455 | 0.623365 | 0.592752 | Trim9/Vps1  |
| GO_BP_m1GO:003556negative re2/2606   | 9/23843 | 0.257455 | 0.623365 | 0.592752 | Fbxo18/Wa   |
| GO_BP_m1GO:003626RNA cappii2/2606    | 9/23843 | 0.257455 | 0.623365 | 0.592752 | Cmtr2/Rnn   |
| GO_BP_m1GO:00364Eneuron intr2/2606   | 9/23843 | 0.257455 | 0.623365 | 0.592752 | Park2/Ralb  |
| GO_BP_m1GO:004236vitamin D t2/2606   | 9/23843 | 0.257455 | 0.623365 | 0.592752 | lfng/Nfkb1  |
| GO_BP_m1GO:00431Cpurine-cor2/2606    | 9/23843 | 0.257455 | 0.623365 | 0.592752 | Adk/Aprt    |
| GO_BP_m1GO:00455Eregulation 2/2606   | 9/23843 | 0.257455 | 0.623365 | 0.592752 | Nckap1l/Pt  |
| GO_BP_m1GO:00459Enegative re2/2606   | 9/23843 | 0.257455 | 0.623365 | 0.592752 | Adora1/Zc:  |
| GO_BP_m1GO:004664regulation 2/2606   | 9/23843 | 0.257455 | 0.623365 | 0.592752 | Nckap1l/Pt  |
| GO_BP_m1GO:004831axial mesor2/2606   | 9/23843 | 0.257455 | 0.623365 | 0.592752 | Epha2/Noç   |
| GO_BP_m1GO:004834paraxial mç2/2606   | 9/23843 | 0.257455 | 0.623365 | 0.592752 | Foxc1/Wnt   |
| GO_BP_m1GO:00509Eequilibriocç2/2606  | 9/23843 | 0.257455 | 0.623365 | 0.592752 | Sox2/Ush1.  |
| GO_BP_m1GO:005141microtubul 2/2606   | 9/23843 | 0.257455 | 0.623365 | 0.592752 | Tubgcp2/T   |
| GO_BP_m1GO:005154positive reç2/2606  | 9/23843 | 0.257455 | 0.623365 | 0.592752 | Fgf7/Has2   |
| GO_BP_m1GO:005179medium-cl2/2606     | 9/23843 | 0.257455 | 0.623365 | 0.592752 | Abhd1/Cro   |
| GO_BP_m1GO:005509phospholiç2/2606    | 9/23843 | 0.257455 | 0.623365 | 0.592752 | Angptl3/Gç  |
| GO_BP_m1GO:00603Ecell adhesir2/2606  | 9/23843 | 0.257455 | 0.623365 | 0.592752 | Cav1/Gcnt:  |
| GO_BP_m1GO:00605Eregulation 2/2606   | 9/23843 | 0.257455 | 0.623365 | 0.592752 | lfng/Nfkb1  |
| GO_BP_m1GO:00610Cpattern spç2/2606   | 9/23843 | 0.257455 | 0.623365 | 0.592752 | Irx2/Osr1   |
| GO_BP_m1GO:007023regulation 2/2606   | 9/23843 | 0.257455 | 0.623365 | 0.592752 | Gpam/Ripk   |
| GO_BP_m1GO:007041cellular resç2/2606 | 9/23843 | 0.257455 | 0.623365 | 0.592752 | Fcor/Saxo1  |
| GO_BP_m1GO:007047positive reç2/2606  | 9/23843 | 0.257455 | 0.623365 | 0.592752 | Abat/Tacr2  |
| GO_BP_m1GO:00709Eoxidative d2/2606   | 9/23843 | 0.257455 | 0.623365 | 0.592752 | Tet2/Tet3   |
| GO_BP_m1GO:007137cellular resç2/2606 | 9/23843 | 0.257455 | 0.623365 | 0.592752 | Epha8/Ppa   |
| GO_BP_m1GO:007204renal systeir2/2606 | 9/23843 | 0.257455 | 0.623365 | 0.592752 | Irx2/Osr1   |

|                                       |           |          |          |          |              |
|---------------------------------------|-----------|----------|----------|----------|--------------|
| GO_BP_m1GO:007264type I inter 2/2606  | 9/23843   | 0.257455 | 0.623365 | 0.592752 | Mmp12/Pt     |
| GO_BP_m1GO:007264interferon- 2/2606   | 9/23843   | 0.257455 | 0.623365 | 0.592752 | Mmp12/Pt     |
| GO_BP_m1GO:007271cellular res 2/2606  | 9/23843   | 0.257455 | 0.623365 | 0.592752 | Blm/Fmr1     |
| GO_BP_m1GO:00861CG-protein 2/2606     | 9/23843   | 0.257455 | 0.623365 | 0.592752 | Atp2b4/Ca    |
| GO_BP_m1GO:009004positive re 2/2606   | 9/23843   | 0.257455 | 0.623365 | 0.592752 | BC004004/    |
| GO_BP_m1GO:009043protein loc 2/2606   | 9/23843   | 0.257455 | 0.623365 | 0.592752 | Nup54/Ost    |
| GO_BP_m1GO:009706cellular res 2/2606  | 9/23843   | 0.257455 | 0.623365 | 0.592752 | Lmo2/Ppar    |
| GO_BP_m1GO:009768glutamate 2/2606     | 9/23843   | 0.257455 | 0.623365 | 0.592752 | Lrrtm4/Ssh   |
| GO_BP_m1GO:009853histone H3 2/2606    | 9/23843   | 0.257455 | 0.623365 | 0.592752 | Ezh1/Hist1   |
| GO_BP_m1GO:009859observatio 2/2606    | 9/23843   | 0.257455 | 0.623365 | 0.592752 | Nf1/Pak1     |
| GO_BP_m1GO:009881spontaneo 2/2606     | 9/23843   | 0.257455 | 0.623365 | 0.592752 | Park2/Stx1   |
| GO_BP_m1GO:009882modulatio 2/2606     | 9/23843   | 0.257455 | 0.623365 | 0.592752 | Abat/Nlgn3   |
| GO_BP_m1GO:19001C negative re 2/2606  | 9/23843   | 0.257455 | 0.623365 | 0.592752 | Nck2/Ptpn    |
| GO_BP_m1GO:190202L-arginine 2/2606    | 9/23843   | 0.257455 | 0.623365 | 0.592752 | Arg1/AU01    |
| GO_BP_m1GO:190203regulation 2/2606    | 9/23843   | 0.257455 | 0.623365 | 0.592752 | Eif2ak2/Kitl |
| GO_BP_m1GO:190209positive re 2/2606   | 9/23843   | 0.257455 | 0.623365 | 0.592752 | Rnase10/Ta   |
| GO_BP_m1GO:190256regulation 2/2606    | 9/23843   | 0.257455 | 0.623365 | 0.592752 | Bcr/Itgam    |
| GO_BP_m1GO:190273regulation 2/2606    | 9/23843   | 0.257455 | 0.623365 | 0.592752 | Mmp12/Pt     |
| GO_BP_m1GO:190274positive re 2/2606   | 9/23843   | 0.257455 | 0.623365 | 0.592752 | Mmp12/Pt     |
| GO_BP_m1GO:190337regulation 2/2606    | 9/23843   | 0.257455 | 0.623365 | 0.592752 | Park2/Ralb   |
| GO_BP_m1GO:190386positive re 2/2606   | 9/23843   | 0.257455 | 0.623365 | 0.592752 | Cdk1/Myc     |
| GO_BP_m1GO:190397regulation 2/2606    | 9/23843   | 0.257455 | 0.623365 | 0.592752 | Itgam/Ttbk   |
| GO_BP_m1GO:190439regulation 2/2606    | 9/23843   | 0.257455 | 0.623365 | 0.592752 | Lrp4/Mesd    |
| GO_BP_m1GO:190466negative re 2/2606   | 9/23843   | 0.257455 | 0.623365 | 0.592752 | Fbxo5/Rpl2   |
| GO_BP_m1GO:200039regulation 2/2606    | 9/23843   | 0.257455 | 0.623365 | 0.592752 | Enpp2/Rrel   |
| GO_BP_m1GO:200048regulation 2/2606    | 9/23843   | 0.257455 | 0.623365 | 0.592752 | Acta2/Dga    |
| GO_BP_m1GO:200118regulation 2/2606    | 9/23843   | 0.257455 | 0.623365 | 0.592752 | Nckap1/Pt    |
| GO_BP_m1GO:00330C muscle cell 27/2606 | 216/23843 | 0.257782 | 0.623365 | 0.592752 | Alox12/Cav   |
| GO_BP_m1GO:00303C cholesterol 10/2606 | 72/23843  | 0.258742 | 0.623365 | 0.592752 | Abca12/An    |
| GO_BP_m1GO:004567regulation 10/2606   | 72/23843  | 0.258742 | 0.623365 | 0.592752 | Adam8/Cal    |
| GO_BP_m1GO:200002regulation 25/2606   | 199/23843 | 0.259457 | 0.623365 | 0.592752 | Abl2/Casp6   |
| GO_BP_m1GO:004312positive re 13/2606  | 97/23843  | 0.259485 | 0.623365 | 0.592752 | 5730559C1    |
| GO_BP_m1GO:005123maintenan 37/2606    | 303/23843 | 0.260745 | 0.623365 | 0.592752 | Akap6/Ang    |
| GO_BP_m1GO:001097negative re 21/2606  | 165/23843 | 0.261985 | 0.623365 | 0.592752 | Aatk/Cdk5/   |
| GO_BP_m1GO:004827vesicle doc 9/2606   | 64/23843  | 0.262121 | 0.623365 | 0.592752 | Ncam1/Nd     |
| GO_BP_m1GO:006137determinat 9/2606    | 64/23843  | 0.262121 | 0.623365 | 0.592752 | Cfc1/Dand    |
| GO_BP_m1GO:003434response tr 17/2606  | 131/23843 | 0.262639 | 0.623365 | 0.592752 | Arg1/Ccl2C   |
| GO_BP_m1GO:004327positive re 35/2606  | 286/23843 | 0.263428 | 0.623365 | 0.592752 | Abat/Abcb    |
| GO_BP_m1GO:000681potassium 29/2606    | 234/23843 | 0.263582 | 0.623365 | 0.592752 | Adora1/Ad    |
| GO_BP_m1GO:000692inflammatc 4/2606    | 24/23843  | 0.263809 | 0.623365 | 0.592752 | Hcar2/Ifng,  |
| GO_BP_m1GO:000709mitotic G2 4/2606    | 24/23843  | 0.263809 | 0.623365 | 0.592752 | Blm/Ccng1    |
| GO_BP_m1GO:000906aspartate f:4/2606   | 24/23843  | 0.263809 | 0.623365 | 0.592752 | Apip/Enop    |
| GO_BP_m1GO:001061negative re 4/2606   | 24/23843  | 0.263809 | 0.623365 | 0.592752 | Atp2b4/Ca    |
| GO_BP_m1GO:001819peptidyl-ar 4/2606   | 24/23843  | 0.263809 | 0.623365 | 0.592752 | Ndufaf7/Pr   |
| GO_BP_m1GO:002189cerebral co 4/2606   | 24/23843  | 0.263809 | 0.623365 | 0.592752 | Arx/Pafah1   |
| GO_BP_m1GO:004533phospholi 4/2606     | 24/23843  | 0.263809 | 0.623365 | 0.592752 | Abcb1a/At    |
| GO_BP_m1GO:004682negative re 4/2606   | 24/23843  | 0.263809 | 0.623365 | 0.592752 | Cdk5/Ei24/   |
| GO_BP_m1GO:004867regulation 4/2606    | 24/23843  | 0.263809 | 0.623365 | 0.592752 | Epha7/Fgf1   |

|                                      |           |          |          |          |              |
|--------------------------------------|-----------|----------|----------|----------|--------------|
| GO_BP_m1GO:005148negative re4/2606   | 24/23843  | 0.263809 | 0.623365 | 0.592752 | Adra1d/Hr    |
| GO_BP_m1GO:006500protein-lip 4/2606  | 24/23843  | 0.263809 | 0.623365 | 0.592752 | Dgat1/Mttq   |
| GO_BP_m1GO:190101positive reç4/2606  | 24/23843  | 0.263809 | 0.623365 | 0.592752 | Akap6/Atp    |
| GO_BP_m1GO:190179positive reç4/2606  | 24/23843  | 0.263809 | 0.623365 | 0.592752 | Ankrd1/Atr   |
| GO_BP_m1GO:200117positive reç4/2606  | 24/23843  | 0.263809 | 0.623365 | 0.592752 | Esrrb/Myc/   |
| GO_BP_m1GO:001096regulation 8/2606   | 56/23843  | 0.265118 | 0.623365 | 0.592752 | Cdc23/Klhl   |
| GO_BP_m1GO:001644somatic rec8/2606   | 56/23843  | 0.265118 | 0.623365 | 0.592752 | Aplf/Ipng/Il |
| GO_BP_m1GO:002151ventral spir8/2606  | 56/23843  | 0.265118 | 0.623365 | 0.592752 | Dbx1/Dll4/   |
| GO_BP_m1GO:004478metaphase8/2606     | 56/23843  | 0.265118 | 0.623365 | 0.592752 | Cdc23/Klhl   |
| GO_BP_m1GO:004512cellular extı8/2606 | 56/23843  | 0.265118 | 0.623365 | 0.592752 | Adam8/Bcr    |
| GO_BP_m1GO:000694striated ml 20/2606 | 157/23843 | 0.267107 | 0.623365 | 0.592752 | Adora1/Ak    |
| GO_BP_m1GO:000701microtubul 7/2606   | 48/23843  | 0.267477 | 0.623365 | 0.592752 | Cib1/Fgf13   |
| GO_BP_m1GO:000713reciprocal r 7/2606 | 48/23843  | 0.267477 | 0.623365 | 0.592752 | Mnd1/Msh     |
| GO_BP_m1GO:001059negative re7/2606   | 48/23843  | 0.267477 | 0.623365 | 0.592752 | Adamts9/S    |
| GO_BP_m1GO:003582homologoi 7/2606    | 48/23843  | 0.267477 | 0.623365 | 0.592752 | Mnd1/Msh     |
| GO_BP_m1GO:004255neuron ma 7/2606    | 48/23843  | 0.267477 | 0.623365 | 0.592752 | Abl2/C1ql1   |
| GO_BP_m1GO:200123regulation 7/2606   | 48/23843  | 0.267477 | 0.623365 | 0.592752 | Gdnf/Il7/Ja  |
| GO_BP_m1GO:001821peptidyl-th 18/2606 | 140/23843 | 0.267752 | 0.623365 | 0.592752 | Camk2a/Cc    |
| GO_BP_m1GO:004663alpha-beta18/2606   | 140/23843 | 0.267752 | 0.623365 | 0.592752 | Abl2/Blm/C   |
| GO_BP_m1GO:000003very long-ı5/2606   | 32/23843  | 0.268122 | 0.623365 | 0.592752 | Abcd3/Acc    |
| GO_BP_m1GO:000268negative re5/2606   | 32/23843  | 0.268122 | 0.623365 | 0.592752 | Adora1/Bcr   |
| GO_BP_m1GO:000270negative re5/2606   | 32/23843  | 0.268122 | 0.623365 | 0.592752 | Arg1/Il10/J  |
| GO_BP_m1GO:000329physiologic 5/2606  | 32/23843  | 0.268122 | 0.623365 | 0.592752 | Akap6/Cav    |
| GO_BP_m1GO:000330physiologic 5/2606  | 32/23843  | 0.268122 | 0.623365 | 0.592752 | Akap6/Cav    |
| GO_BP_m1GO:000608acetyl-CoA5/2606    | 32/23843  | 0.268122 | 0.623365 | 0.592752 | Fasn/Hmgc    |
| GO_BP_m1GO:001819peptidyl-aç5/2606   | 32/23843  | 0.268122 | 0.623365 | 0.592752 | Fut8/St3ga   |
| GO_BP_m1GO:002241circadian sl5/2606  | 32/23843  | 0.268122 | 0.623365 | 0.592752 | Adora1/Dri   |
| GO_BP_m1GO:003623granulocyti5/2606   | 32/23843  | 0.268122 | 0.623365 | 0.592752 | Anxa3/Bcr/   |
| GO_BP_m1GO:004283defense reç5/2606   | 32/23843  | 0.268122 | 0.623365 | 0.592752 | Arg1/Ipng/l  |
| GO_BP_m1GO:004507positive reç5/2606  | 32/23843  | 0.268122 | 0.623365 | 0.592752 | Fkbp6/Nuc    |
| GO_BP_m1GO:004632negative re5/2606   | 32/23843  | 0.268122 | 0.623365 | 0.592752 | Dusp3/Mec    |
| GO_BP_m1GO:004664regulation 5/2606   | 32/23843  | 0.268122 | 0.623365 | 0.592752 | Blm/Cd80/    |
| GO_BP_m1GO:005164nucleus loc5/2606   | 32/23843  | 0.268122 | 0.623365 | 0.592752 | Cav3/Dock    |
| GO_BP_m1GO:006104cell growth5/2606   | 32/23843  | 0.268122 | 0.623365 | 0.592752 | Akap6/Cav    |
| GO_BP_m1GO:190268mitochond 5/2606    | 32/23843  | 0.268122 | 0.623365 | 0.592752 | Bnip3/Bok/   |
| GO_BP_m1GO:190342regulation 5/2606   | 32/23843  | 0.268122 | 0.623365 | 0.592752 | Ednrb/Npr:   |
| GO_BP_m1GO:007050calcium ior 11/2606 | 81/23843  | 0.268407 | 0.623365 | 0.592752 | Cacnb2/Ca    |
| GO_BP_m1GO:009758lamellipodi 11/2606 | 81/23843  | 0.268407 | 0.623365 | 0.592752 | Abi1/Arhge   |
| GO_BP_m1GO:190040regulation 11/2606  | 81/23843  | 0.268407 | 0.623365 | 0.592752 | Cd36/Endc    |
| GO_BP_m1GO:000637mRNA poly6/2606     | 40/23843  | 0.268757 | 0.623365 | 0.592752 | Cpeb3/Cps    |
| GO_BP_m1GO:004873epidermis r6/2606   | 40/23843  | 0.268757 | 0.623365 | 0.592752 | Ctsl/Fgf7/F  |
| GO_BP_m1GO:004887homeostas 6/2606    | 40/23843  | 0.268757 | 0.623365 | 0.592752 | Gigyf2/Il7/l |
| GO_BP_m1GO:007154dopaminer 6/2606    | 40/23843  | 0.268757 | 0.623365 | 0.592752 | Cdnf/Dmrt    |
| GO_BP_m1GO:009022regulation 6/2606   | 40/23843  | 0.268757 | 0.623365 | 0.592752 | Ankrd53/Bi   |
| GO_BP_m1GO:190581negative re6/2606   | 40/23843  | 0.268757 | 0.623365 | 0.592752 | Klhl22/Mac   |
| GO_BP_m1GO:200072regulation 6/2606   | 40/23843  | 0.268757 | 0.623365 | 0.592752 | Akap6/Cav    |
| GO_BP_m1GO:003030positive reç23/2606 | 183/23843 | 0.269653 | 0.623365 | 0.592752 | Adnp2/Aka    |
| GO_BP_m1GO:005086negative re23/2606  | 183/23843 | 0.269653 | 0.623365 | 0.592752 | Abat/Alox1   |

|                   |                      |           |          |          |          |             |
|-------------------|----------------------|-----------|----------|----------|----------|-------------|
| GO_BP_m1GO:00447E | cilium orga39/2606   | 322/23843 | 0.271209 | 0.623365 | 0.592752 | B9d1/Bbs1   |
| GO_BP_m1GO:001631 | dephosphc43/2606     | 357/23843 | 0.271347 | 0.623365 | 0.592752 | 2810408A1   |
| GO_BP_m1GO:00307E | regulation 13/2606   | 98/23843  | 0.271585 | 0.623365 | 0.592752 | Adm/Adra1   |
| GO_BP_m1GO:00995E | chemical sy13/2606   | 98/23843  | 0.271585 | 0.623365 | 0.592752 | Abat/Adora1 |
| GO_BP_m1GO:000647 | internal prc19/2606  | 149/23843 | 0.272409 | 0.623365 | 0.592752 | Brpf3/Nat8  |
| GO_BP_m1GO:001591 | sterol trans10/2606  | 73/23843  | 0.272857 | 0.623365 | 0.592752 | Abca12/An   |
| GO_BP_m1GO:00224C | membrane 10/2606     | 73/23843  | 0.272857 | 0.623365 | 0.592752 | Ncam1/Nd    |
| GO_BP_m1GO:00362E | cellular res15/2606  | 115/23843 | 0.272909 | 0.623365 | 0.592752 | Adam8/Bni   |
| GO_BP_m1GO:00076E | circadian r124/2606  | 192/23843 | 0.273077 | 0.623365 | 0.592752 | Adora1/An   |
| GO_BP_m1GO:00316E | cellular res124/2606 | 192/23843 | 0.273077 | 0.623365 | 0.592752 | Aoc1/Atf3/  |
| GO_BP_m1GO:003214 | activation c30/2606  | 244/23843 | 0.273868 | 0.623365 | 0.592752 | 5730559C1   |
| GO_BP_m1GO:00092E | response tr20/2606   | 158/23843 | 0.276668 | 0.623365 | 0.592752 | Adora1/An   |
| GO_BP_m1GO:00511C | negative re20/2606   | 158/23843 | 0.276668 | 0.623365 | 0.592752 | Cav1/Csnk1  |
| GO_BP_m1GO:000271 | regulation 9/2606    | 65/23843  | 0.277221 | 0.623365 | 0.592752 | Arg1/Cd36   |
| GO_BP_m1GO:00481E | regulation 9/2606    | 65/23843  | 0.277221 | 0.623365 | 0.592752 | Camk2a/Di   |
| GO_BP_m1GO:00032C | cardiac cha18/2606   | 141/23843 | 0.277904 | 0.623365 | 0.592752 | Adamts1/C   |
| GO_BP_m1GO:00091E | ribonucleo:18/2606   | 141/23843 | 0.277904 | 0.623365 | 0.592752 | Adss/Atp5a  |
| GO_BP_m1GO:001907 | viral genon14/2606   | 107/23843 | 0.278298 | 0.623365 | 0.592752 | Eif2ak2/Fkk |
| GO_BP_m1GO:004324 | regulation 14/2606   | 107/23843 | 0.278298 | 0.623365 | 0.592752 | Asph/Bnip3  |
| GO_BP_m1GO:00512E | regulation 14/2606   | 107/23843 | 0.278298 | 0.623365 | 0.592752 | Akap6/Asp   |
| GO_BP_m1GO:003007 | peptide ho32/2606    | 262/23843 | 0.278528 | 0.623365 | 0.592752 | Abat/Ano1   |
| GO_BP_m1GO:00975E | calcium ior16/2606   | 124/23843 | 0.278544 | 0.623365 | 0.592752 | Akap6/Asp   |
| GO_BP_m1GO:19026E | secondary 16/2606    | 124/23843 | 0.278544 | 0.623365 | 0.592752 | Angptl3/Cy  |
| GO_BP_m1GO:00456E | regulation 26/2606   | 210/23843 | 0.279241 | 0.623365 | 0.592752 | Adam8/Cal   |
| GO_BP_m1GO:000691 | nucleocyto37/2606    | 306/23843 | 0.281232 | 0.623365 | 0.592752 | 1700123L1   |
| GO_BP_m1GO:00466E | lymphocyte37/2606    | 306/23843 | 0.281232 | 0.623365 | 0.592752 | Adk/Arg1/l  |
| GO_BP_m1GO:00341E | regulation 8/2606    | 57/23843  | 0.281391 | 0.623365 | 0.592752 | Cactin/Cav  |
| GO_BP_m1GO:004851 | circadian b8/2606    | 57/23843  | 0.281391 | 0.623365 | 0.592752 | Adora1/Csi  |
| GO_BP_m1GO:20001E | negative re8/2606    | 57/23843  | 0.281391 | 0.623365 | 0.592752 | Cdkn1a/E2   |
| GO_BP_m1GO:20007E | regulation 8/2606    | 57/23843  | 0.281391 | 0.623365 | 0.592752 | Eif2ak2/Esr |
| GO_BP_m1GO:19030E | regulation 24/2606   | 193/23843 | 0.281788 | 0.623365 | 0.592752 | Arih2/Bcap  |
| GO_BP_m1GO:00353C | regulation 11/2606   | 82/23843  | 0.281898 | 0.623365 | 0.592752 | 2810408A1   |
| GO_BP_m1GO:00432E | regulation 51/2606   | 429/23843 | 0.281917 | 0.623365 | 0.592752 | Ankra2/An   |
| GO_BP_m1GO:00434C | positive re27/2606   | 219/23843 | 0.282024 | 0.623365 | 0.592752 | 5730559C1   |
| GO_BP_m1GO:00000E | ribosomal :3/2606    | 17/23843  | 0.282346 | 0.623365 | 0.592752 | Nmd3/Rasl   |
| GO_BP_m1GO:000204 | blood vess3/2606     | 17/23843  | 0.282346 | 0.623365 | 0.592752 | Dll4/Epha2  |
| GO_BP_m1GO:00062C | pyrimidine 3/2606    | 17/23843  | 0.282346 | 0.623365 | 0.592752 | Dpyd/Dpys   |
| GO_BP_m1GO:000821 | estrogen r3/2606     | 17/23843  | 0.282346 | 0.623365 | 0.592752 | Hsd17b4/P   |
| GO_BP_m1GO:00090E | glutamine :3/2606    | 17/23843  | 0.282346 | 0.623365 | 0.592752 | Gls/Otc/Py  |
| GO_BP_m1GO:00316E | synaptic ve3/2606    | 17/23843  | 0.282346 | 0.623365 | 0.592752 | Snap29/Stx  |
| GO_BP_m1GO:00322E | regulation 3/2606    | 17/23843  | 0.282346 | 0.623365 | 0.592752 | Gdnf/Ptgs2  |
| GO_BP_m1GO:00329E | protein-D13/2606     | 17/23843  | 0.282346 | 0.623365 | 0.592752 | Myc/Rpl23   |
| GO_BP_m1GO:00337E | ribosome l3/2606     | 17/23843  | 0.282346 | 0.623365 | 0.592752 | Nmd3/Rasl   |
| GO_BP_m1GO:00343E | telomere lc3/2606    | 17/23843  | 0.282346 | 0.623365 | 0.592752 | Terb1/Lem   |
| GO_BP_m1GO:00350E | regulation 3/2606    | 17/23843  | 0.282346 | 0.623365 | 0.592752 | Arhgap44/   |
| GO_BP_m1GO:00360E | fucosylatio3/2606    | 17/23843  | 0.282346 | 0.623365 | 0.592752 | Fut8/Slc35c |
| GO_BP_m1GO:00380E | nodal sign:3/2606    | 17/23843  | 0.282346 | 0.623365 | 0.592752 | Cfc1/Dand   |
| GO_BP_m1GO:00435E | nose devel3/2606     | 17/23843  | 0.282346 | 0.623365 | 0.592752 | Aldh1a3/G   |

|                                       |           |          |          |          |               |
|---------------------------------------|-----------|----------|----------|----------|---------------|
| GO_BP_m1GO:004403cell wall m3/2606    | 17/23843  | 0.282346 | 0.623365 | 0.592752 | 1700016DC     |
| GO_BP_m1GO:004557positive re3/2606    | 17/23843  | 0.282346 | 0.623365 | 0.592752 | Il2rg/Mmp     |
| GO_BP_m1GO:004572positive re3/2606    | 17/23843  | 0.282346 | 0.623365 | 0.592752 | Kat2a/Kat2    |
| GO_BP_m1GO:004633diacylglyce 3/2606   | 17/23843  | 0.282346 | 0.623365 | 0.592752 | Dgat1/Dgk     |
| GO_BP_m1GO:004669decidualiza3/2606    | 17/23843  | 0.282346 | 0.623365 | 0.592752 | Cdh1/Ctsl/    |
| GO_BP_m1GO:004685negative re3/2606    | 17/23843  | 0.282346 | 0.623365 | 0.592752 | Cartpt/Cldr   |
| GO_BP_m1GO:004829isotype swi3/2606    | 17/23843  | 0.282346 | 0.623365 | 0.592752 | lfng/Il27ra/  |
| GO_BP_m1GO:005144negative re3/2606    | 17/23843  | 0.282346 | 0.623365 | 0.592752 | Fbxo5/Rpl2    |
| GO_BP_m1GO:006041atrial septu3/2606   | 17/23843  | 0.282346 | 0.623365 | 0.592752 | Cfc1/Smo/     |
| GO_BP_m1GO:007155cell wall or3/2606   | 17/23843  | 0.282346 | 0.623365 | 0.592752 | 1700016DC     |
| GO_BP_m1GO:007223metaneph3/2606       | 17/23843  | 0.282346 | 0.623365 | 0.592752 | Lgr4/Osr1/    |
| GO_BP_m1GO:009750mannosyla 3/2606     | 17/23843  | 0.282346 | 0.623365 | 0.592752 | Nus1/Pigb/    |
| GO_BP_m1GO:009950vesicle fusio3/2606  | 17/23843  | 0.282346 | 0.623365 | 0.592752 | Snap29/Stx    |
| GO_BP_m1GO:190217negative re3/2606    | 17/23843  | 0.282346 | 0.623365 | 0.592752 | Gpx1/Hsph     |
| GO_BP_m1GO:200000regulation 3/2606    | 17/23843  | 0.282346 | 0.623365 | 0.592752 | Cul4a/Nek     |
| GO_BP_m1GO:001635dendrite de34/2606   | 280/23843 | 0.282701 | 0.623365 | 0.592752 | Abi1/Abi2/    |
| GO_BP_m1GO:003527endocrine :17/2606   | 133/23843 | 0.283609 | 0.623365 | 0.592752 | Arntl/Cdkn    |
| GO_BP_m1GO:005071positive re17/2606   | 133/23843 | 0.283609 | 0.623365 | 0.592752 | Abl2/Btnl2,   |
| GO_BP_m1GO:000680xenobiotic 13/2606   | 99/23843  | 0.283867 | 0.623365 | 0.592752 | Acsl1/Akr1.   |
| GO_BP_m1GO:000919cyclic nucle 13/2606 | 99/23843  | 0.283867 | 0.623365 | 0.592752 | Adcy4/Adr.    |
| GO_BP_m1GO:000754sex differer35/2606  | 289/23843 | 0.284628 | 0.623365 | 0.592752 | Ccdc182/A     |
| GO_BP_m1GO:000204cell migrati7/2606   | 49/23843  | 0.285189 | 0.623365 | 0.592752 | Cib1/Dll4/E   |
| GO_BP_m1GO:003019negative re7/2606    | 49/23843  | 0.285189 | 0.623365 | 0.592752 | Abat/Alox1    |
| GO_BP_m1GO:003294secretion b7/2606    | 49/23843  | 0.285189 | 0.623365 | 0.592752 | Adora1/Ch     |
| GO_BP_m1GO:004568positive re7/2606    | 49/23843  | 0.285189 | 0.623365 | 0.592752 | Enpp2/Hda     |
| GO_BP_m1GO:005502positive re7/2606    | 49/23843  | 0.285189 | 0.623365 | 0.592752 | Akap6/Cdk     |
| GO_BP_m1GO:007097protein loc 7/2606   | 49/23843  | 0.285189 | 0.623365 | 0.592752 | Bcap29/Bc     |
| GO_BP_m1GO:190004negative re7/2606    | 49/23843  | 0.285189 | 0.623365 | 0.592752 | Abat/Alox1    |
| GO_BP_m1GO:004441interspecie 49/2606  | 412/23843 | 0.285564 | 0.623365 | 0.592752 | Anxa2/Arg     |
| GO_BP_m1GO:000683mitochond 32/2606    | 263/23843 | 0.28603  | 0.623365 | 0.592752 | Arih2/Atp5    |
| GO_BP_m1GO:000926ribonucleo 32/2606   | 263/23843 | 0.28603  | 0.623365 | 0.592752 | Adcy4/Adr.    |
| GO_BP_m1GO:005129protein het20/2606   | 159/23843 | 0.286349 | 0.623365 | 0.592752 | Anxa2/Cbr.    |
| GO_BP_m1GO:007190positive re36/2606   | 298/23843 | 0.286457 | 0.623365 | 0.592752 | 5730559C1     |
| GO_BP_m1GO:003272positive re10/2606   | 74/23843  | 0.287199 | 0.623365 | 0.592752 | Abl2/Fam4     |
| GO_BP_m1GO:003432cell junctio 23/2606 | 185/23843 | 0.287511 | 0.623365 | 0.592752 | Bcas3/Cav1    |
| GO_BP_m1GO:000165eye develo 46/2606   | 386/23843 | 0.288076 | 0.623365 | 0.592752 | Abcb5/Ach     |
| GO_BP_m1GO:005116nuclear tra 37/2606  | 307/23843 | 0.288197 | 0.623365 | 0.592752 | 1700123L1     |
| GO_BP_m1GO:000018activation c6/2606   | 41/23843  | 0.288291 | 0.623365 | 0.592752 | Adora1/Ca     |
| GO_BP_m1GO:001067negative re6/2606    | 41/23843  | 0.288291 | 0.623365 | 0.592752 | C1qtnf3/Cc    |
| GO_BP_m1GO:004592positive re6/2606    | 41/23843  | 0.288291 | 0.623365 | 0.592752 | Avpr1a/Dg     |
| GO_BP_m1GO:005159positive re6/2606    | 41/23843  | 0.288291 | 0.623365 | 0.592752 | Htr6/Park2    |
| GO_BP_m1GO:009034regulation 6/2606    | 41/23843  | 0.288291 | 0.623365 | 0.592752 | Arntl/Mb21    |
| GO_BP_m1GO:190266regulation 6/2606    | 41/23843  | 0.288291 | 0.623365 | 0.592752 | Plxna2/Sen    |
| GO_BP_m1GO:000046cleavage in4/2606    | 25/23843  | 0.289231 | 0.623365 | 0.592752 | Bms1/Eri1/    |
| GO_BP_m1GO:000282regulation 4/2606    | 25/23843  | 0.289231 | 0.623365 | 0.592752 | Il12b/Il1rl1. |
| GO_BP_m1GO:001086positive re4/2606    | 25/23843  | 0.289231 | 0.623365 | 0.592752 | Abl2/Adcy     |
| GO_BP_m1GO:001089positive re4/2606    | 25/23843  | 0.289231 | 0.623365 | 0.592752 | Fgf1/lfng/F   |
| GO_BP_m1GO:003420lipid transk4/2606   | 25/23843  | 0.289231 | 0.623365 | 0.592752 | Abcb1a/At     |

|                   |                     |           |          |          |          |               |
|-------------------|---------------------|-----------|----------|----------|----------|---------------|
| GO_BP_m1GO:003634 | post-anal t4/2606   | 25/23843  | 0.289231 | 0.623365 | 0.592752 | Epha2/Tcf1    |
| GO_BP_m1GO:00421C | positive reç4/2606  | 25/23843  | 0.289231 | 0.623365 | 0.592752 | Gpam/Il12l    |
| GO_BP_m1GO:004337 | positive reç4/2606  | 25/23843  | 0.289231 | 0.623365 | 0.592752 | lfng/Il2rg/lf |
| GO_BP_m1GO:004411 | growth of ç4/2606   | 25/23843  | 0.289231 | 0.623365 | 0.592752 | Cd36/lfng/    |
| GO_BP_m1GO:00455E | regulation 4/2606   | 25/23843  | 0.289231 | 0.623365 | 0.592752 | Ctla4/lfng/   |
| GO_BP_m1GO:00463E | monosacç4/2606      | 25/23843  | 0.289231 | 0.623365 | 0.592752 | Ldha/Rpe/     |
| GO_BP_m1GO:00509C | leukocyte t4/2606   | 25/23843  | 0.289231 | 0.623365 | 0.592752 | Ccl28/Gcnt    |
| GO_BP_m1GO:00509E | sensory pe 4/2606   | 25/23843  | 0.289231 | 0.623365 | 0.592752 | Adora1/An     |
| GO_BP_m1GO:00600C | Sertoli cell 4/2606 | 25/23843  | 0.289231 | 0.623365 | 0.592752 | Dmrt1/Hsd     |
| GO_BP_m1GO:00701E | synaptoner4/2606    | 25/23843  | 0.289231 | 0.623365 | 0.592752 | Syce2/Sycc    |
| GO_BP_m1GO:007201 | glomerulus4/2606    | 25/23843  | 0.289231 | 0.623365 | 0.592752 | lfng/Osr1/f   |
| GO_BP_m1GO:009014 | regulation 4/2606   | 25/23843  | 0.289231 | 0.623365 | 0.592752 | Bnip3/Dcn,    |
| GO_BP_m1GO:00059E | monosacç30/2606     | 246/23843 | 0.289387 | 0.623365 | 0.592752 | Atf3/Bpgm     |
| GO_BP_m1GO:00061C | citrate met 5/2606  | 33/23843  | 0.290081 | 0.623365 | 0.592752 | ldh2/ldh3a    |
| GO_BP_m1GO:00105E | regulation 5/2606   | 33/23843  | 0.290081 | 0.623365 | 0.592752 | Cfl1/Epha2    |
| GO_BP_m1GO:00148E | response tr5/2606   | 33/23843  | 0.290081 | 0.623365 | 0.592752 | Gpam/Myf      |
| GO_BP_m1GO:00343C | primary alc5/2606   | 33/23843  | 0.290081 | 0.623365 | 0.592752 | Adh1/AdhE     |
| GO_BP_m1GO:00458E | negative re5/2606   | 33/23843  | 0.290081 | 0.623365 | 0.592752 | Kif7/Prkack   |
| GO_BP_m1GO:004591 | positive reç5/2606  | 33/23843  | 0.290081 | 0.623365 | 0.592752 | Blm/lfng/P    |
| GO_BP_m1GO:19035E | positive reç5/2606  | 33/23843  | 0.290081 | 0.623365 | 0.592752 | Cdk1/Esrrb    |
| GO_BP_m1GO:00000E | G2/M tranç14/2606   | 108/23843 | 0.290159 | 0.623365 | 0.592752 | Abcb1a/Blr    |
| GO_BP_m1GO:00323E | regulation 14/2606  | 108/23843 | 0.290159 | 0.623365 | 0.592752 | Abca12/An     |
| GO_BP_m1GO:00164E | protein prc31/2606  | 255/23843 | 0.291558 | 0.623365 | 0.592752 | Aph1a/Apf     |
| GO_BP_m1GO:00002E | mitotic cytr9/2606  | 66/23843  | 0.292558 | 0.623365 | 0.592752 | Ankrd53/C     |
| GO_BP_m1GO:19017E | regulation 9/2606   | 66/23843  | 0.292558 | 0.623365 | 0.592752 | Ankrd1/Atr    |
| GO_BP_m1GO:19037E | regulation 9/2606   | 66/23843  | 0.292558 | 0.623365 | 0.592752 | Epha8/FprE    |
| GO_BP_m1GO:002261 | ribonucleoç50/2606  | 422/23843 | 0.292686 | 0.623365 | 0.592752 | Atr/Bms1/f    |
| GO_BP_m1GO:00002E | pachytene 1/2606    | 3/23843   | 0.293373 | 0.623365 | 0.592752 | Topaz1        |
| GO_BP_m1GO:00004E | regulation 1/2606   | 3/23843   | 0.293373 | 0.623365 | 0.592752 | Foxa2         |
| GO_BP_m1GO:00004E | positive reç1/2606  | 3/23843   | 0.293373 | 0.623365 | 0.592752 | Foxa2         |
| GO_BP_m1GO:00004E | rRNA 2'-O 1/2606    | 3/23843   | 0.293373 | 0.623365 | 0.592752 | Mrm1          |
| GO_BP_m1GO:00009E | mitochond 1/2606    | 3/23843   | 0.293373 | 0.623365 | 0.592752 | Pnpt1         |
| GO_BP_m1GO:000154 | preantral o 1/2606  | 3/23843   | 0.293373 | 0.623365 | 0.592752 | Amh           |
| GO_BP_m1GO:00018E | inner cell n 1/2606 | 3/23843   | 0.293373 | 0.623365 | 0.592752 | Lats1         |
| GO_BP_m1GO:00018E | inner cell n 1/2606 | 3/23843   | 0.293373 | 0.623365 | 0.592752 | Lats1         |
| GO_BP_m1GO:00018E | trophectod 1/2606   | 3/23843   | 0.293373 | 0.623365 | 0.592752 | Esrrb         |
| GO_BP_m1GO:00019E | barorecept 1/2606   | 3/23843   | 0.293373 | 0.623365 | 0.592752 | Adra1d        |
| GO_BP_m1GO:00022E | myeloid de 1/2606   | 3/23843   | 0.293373 | 0.623365 | 0.592752 | Pycard        |
| GO_BP_m1GO:00023E | B-1a B cell 1/2606  | 3/23843   | 0.293373 | 0.623365 | 0.592752 | Cmtm7         |
| GO_BP_m1GO:00023E | immunoglç 1/2606    | 3/23843   | 0.293373 | 0.623365 | 0.592752 | Ptpcr         |
| GO_BP_m1GO:000254 | leukotriene 1/2606  | 3/23843   | 0.293373 | 0.623365 | 0.592752 | Alox5         |
| GO_BP_m1GO:00025E | serotonin s 1/2606  | 3/23843   | 0.293373 | 0.623365 | 0.592752 | P2rx1         |
| GO_BP_m1GO:00025E | positive reç 1/2606 | 3/23843   | 0.293373 | 0.623365 | 0.592752 | Pycard        |
| GO_BP_m1GO:00028E | regulation 1/2606   | 3/23843   | 0.293373 | 0.623365 | 0.592752 | Il10          |
| GO_BP_m1GO:000294 | tRNA C5-c 1/2606    | 3/23843   | 0.293373 | 0.623365 | 0.592752 | Mettl6        |
| GO_BP_m1GO:000294 | tRNA threc 1/2606   | 3/23843   | 0.293373 | 0.623365 | 0.592752 | Osgepl1       |
| GO_BP_m1GO:00032E | right ventri 1/2606 | 3/23843   | 0.293373 | 0.623365 | 0.592752 | Zfpm2         |
| GO_BP_m1GO:00032E | apoptotic ç 1/2606  | 3/23843   | 0.293373 | 0.623365 | 0.592752 | Foxc1         |



|                                      |         |          |          |          |         |
|--------------------------------------|---------|----------|----------|----------|---------|
| GO_BP_m1GO:00032Eseptum sec1/2606    | 3/23843 | 0.293373 | 0.623365 | 0.592752 | Nsd2    |
| GO_BP_m1GO:00033Ebrainstem c1/2606   | 3/23843 | 0.293373 | 0.623365 | 0.592752 | Cntfr   |
| GO_BP_m1GO:00059Etrehalose n1/2606   | 3/23843 | 0.293373 | 0.623365 | 0.592752 | Pgghg   |
| GO_BP_m1GO:00060Cfructose ca1/2606   | 3/23843 | 0.293373 | 0.623365 | 0.592752 | Tkfc    |
| GO_BP_m1GO:00061Cfumarate n1/2606    | 3/23843 | 0.293373 | 0.623365 | 0.592752 | Got1    |
| GO_BP_m1GO:00062EdTMP bios1/2606     | 3/23843 | 0.293373 | 0.623365 | 0.592752 | Shmt1   |
| GO_BP_m1GO:00062Ebase-excisi1/2606   | 3/23843 | 0.293373 | 0.623365 | 0.592752 | Ung     |
| GO_BP_m1GO:00062Enucleotide 1/2606   | 3/23843 | 0.293373 | 0.623365 | 0.592752 | Ercc5   |
| GO_BP_m1GO:00063Etranscriptic1/2606  | 3/23843 | 0.293373 | 0.623365 | 0.592752 | Tfb2m   |
| GO_BP_m1GO:00063Eterminator1/2606    | 3/23843 | 0.293373 | 0.623365 | 0.592752 | Mterf2  |
| GO_BP_m1GO:00064C RNA impor1/2606    | 3/23843 | 0.293373 | 0.623365 | 0.592752 | Tpr     |
| GO_BP_m1GO:00064E valyl-tRNA 1/2606  | 3/23843 | 0.293373 | 0.623365 | 0.592752 | Vars2   |
| GO_BP_m1GO:00065E aspartate t1/2606  | 3/23843 | 0.293373 | 0.623365 | 0.592752 | Got1    |
| GO_BP_m1GO:000654glutamine r1/2606   | 3/23843 | 0.293373 | 0.623365 | 0.592752 | Gls     |
| GO_BP_m1GO:000654glycine cat1/2606   | 3/23843 | 0.293373 | 0.623365 | 0.592752 | Gldc    |
| GO_BP_m1GO:00065ES-adenosy 1/2606    | 3/23843 | 0.293373 | 0.623365 | 0.592752 | Mat2b   |
| GO_BP_m1GO:00065EL-serine ca1/2606   | 3/23843 | 0.293373 | 0.623365 | 0.592752 | Shmt1   |
| GO_BP_m1GO:00066E sphingalin 1/2606  | 3/23843 | 0.293373 | 0.623365 | 0.592752 | Sptlc2  |
| GO_BP_m1GO:00066E ergosterol 1/2606  | 3/23843 | 0.293373 | 0.623365 | 0.592752 | Fdft1   |
| GO_BP_m1GO:000671androgen c1/2606    | 3/23843 | 0.293373 | 0.623365 | 0.592752 | Spp1    |
| GO_BP_m1GO:000677thiamine r1/2606    | 3/23843 | 0.293373 | 0.623365 | 0.592752 | Acpp    |
| GO_BP_m1GO:00070E spindle ass1/2606  | 3/23843 | 0.293373 | 0.623365 | 0.592752 | Fbxo5   |
| GO_BP_m1GO:00070E female mei1/2606   | 3/23843 | 0.293373 | 0.623365 | 0.592752 | Sycp3   |
| GO_BP_m1GO:00070E traversing c1/2606 | 3/23843 | 0.293373 | 0.623365 | 0.592752 | Mtbp    |
| GO_BP_m1GO:00072E positive re1/2606  | 3/23843 | 0.293373 | 0.623365 | 0.592752 | Smo     |
| GO_BP_m1GO:00073E thorax and 1/2606  | 3/23843 | 0.293373 | 0.623365 | 0.592752 | Wt1     |
| GO_BP_m1GO:00075E establishm1/2606   | 3/23843 | 0.293373 | 0.623365 | 0.592752 | Gphn    |
| GO_BP_m1GO:00082C ergosterol 1/2606  | 3/23843 | 0.293373 | 0.623365 | 0.592752 | Fdft1   |
| GO_BP_m1GO:000944gamma-an1/2606      | 3/23843 | 0.293373 | 0.623365 | 0.592752 | Abat    |
| GO_BP_m1GO:00097E detection c1/2606  | 3/23843 | 0.293373 | 0.623365 | 0.592752 | Foxa2   |
| GO_BP_m1GO:00097E detection c1/2606  | 3/23843 | 0.293373 | 0.623365 | 0.592752 | Foxa2   |
| GO_BP_m1GO:00101E proline cat1/2606  | 3/23843 | 0.293373 | 0.623365 | 0.592752 | Aldh4a1 |
| GO_BP_m1GO:00101E specificatio1/2606 | 3/23843 | 0.293373 | 0.623365 | 0.592752 | Hoxa3   |
| GO_BP_m1GO:001024establishm1/2606    | 3/23843 | 0.293373 | 0.623365 | 0.592752 | Slc22a1 |
| GO_BP_m1GO:00103E COP9 sign1/2606    | 3/23843 | 0.293373 | 0.623365 | 0.592752 | Wnt3a   |
| GO_BP_m1GO:00107E negative re1/2606  | 3/23843 | 0.293373 | 0.623365 | 0.592752 | Atp2b4  |
| GO_BP_m1GO:00108E negative re1/2606  | 3/23843 | 0.293373 | 0.623365 | 0.592752 | Xrcc1   |
| GO_BP_m1GO:00109E negative re1/2606  | 3/23843 | 0.293373 | 0.623365 | 0.592752 | Nfkb1   |
| GO_BP_m1GO:00109E regulation 1/2606  | 3/23843 | 0.293373 | 0.623365 | 0.592752 | Arg1    |
| GO_BP_m1GO:00109E regulation 1/2606  | 3/23843 | 0.293373 | 0.623365 | 0.592752 | Eif2ak1 |
| GO_BP_m1GO:001401neuroblast 1/2606   | 3/23843 | 0.293373 | 0.623365 | 0.592752 | Bche    |
| GO_BP_m1GO:00140E positive re1/2606  | 3/23843 | 0.293373 | 0.623365 | 0.592752 | Tacr2   |
| GO_BP_m1GO:001491regulation 1/2606   | 3/23843 | 0.293373 | 0.623365 | 0.592752 | Gch1    |
| GO_BP_m1GO:001567plasma me 1/2606    | 3/23843 | 0.293373 | 0.623365 | 0.592752 | Slc31a1 |
| GO_BP_m1GO:00156E ferrous iror1/2606 | 3/23843 | 0.293373 | 0.623365 | 0.592752 | Slc40a1 |
| GO_BP_m1GO:001591aminophos1/2606     | 3/23843 | 0.293373 | 0.623365 | 0.592752 | Atp8b1  |
| GO_BP_m1GO:00159E diadenosin 1/2606  | 3/23843 | 0.293373 | 0.623365 | 0.592752 | Kars    |
| GO_BP_m1GO:00159E diadenosin 1/2606  | 3/23843 | 0.293373 | 0.623365 | 0.592752 | Kars    |

|          |           |                     |         |          |          |          |          |
|----------|-----------|---------------------|---------|----------|----------|----------|----------|
| GO_BP_m1 | GO:001596 | diadenosin 1/2606   | 3/23843 | 0.293373 | 0.623365 | 0.592752 | Kars     |
| GO_BP_m1 | GO:001609 | polyprenol 1/2606   | 3/23843 | 0.293373 | 0.623365 | 0.592752 | Nus1     |
| GO_BP_m1 | GO:001648 | negative re 1/2606  | 3/23843 | 0.293373 | 0.623365 | 0.592752 | Maf1     |
| GO_BP_m1 | GO:001656 | protein im 1/2606   | 3/23843 | 0.293373 | 0.623365 | 0.592752 | Pex5     |
| GO_BP_m1 | GO:001718 | peptidyl-gl 1/2606  | 3/23843 | 0.293373 | 0.623365 | 0.592752 | Vkorc111 |
| GO_BP_m1 | GO:001819 | peptidyl-a 1/2606   | 3/23843 | 0.293373 | 0.623365 | 0.592752 | Asph     |
| GO_BP_m1 | GO:001904 | latent virus 1/2606 | 3/23843 | 0.293373 | 0.623365 | 0.592752 | Nucks1   |
| GO_BP_m1 | GO:001904 | release fro 1/2606  | 3/23843 | 0.293373 | 0.623365 | 0.592752 | Nucks1   |
| GO_BP_m1 | GO:001906 | fusion of vi 1/2606 | 3/23843 | 0.293373 | 0.623365 | 0.592752 | Hyal2    |
| GO_BP_m1 | GO:001906 | receptor-n 1/2606   | 3/23843 | 0.293373 | 0.623365 | 0.592752 | Cav1     |
| GO_BP_m1 | GO:001928 | isopentenyl 1/2606  | 3/23843 | 0.293373 | 0.623365 | 0.592752 | Mvd      |
| GO_BP_m1 | GO:001932 | pentose ca 1/2606   | 3/23843 | 0.293373 | 0.623365 | 0.592752 | Rpe      |
| GO_BP_m1 | GO:001937 | cyclooxyge 1/2606   | 3/23843 | 0.293373 | 0.623365 | 0.592752 | Ptgs2    |
| GO_BP_m1 | GO:00194C | alditol cata 1/2606 | 3/23843 | 0.293373 | 0.623365 | 0.592752 | Tkfc     |
| GO_BP_m1 | GO:001946 | glycine dec 1/2606  | 3/23843 | 0.293373 | 0.623365 | 0.592752 | Gldc     |
| GO_BP_m1 | GO:001974 | regulation 1/2606   | 3/23843 | 0.293373 | 0.623365 | 0.592752 | Dgat1    |
| GO_BP_m1 | GO:001991 | peptidyl-ar 1/2606  | 3/23843 | 0.293373 | 0.623365 | 0.592752 | Ndufaf7  |
| GO_BP_m1 | GO:002156 | vagus nerv 1/2606   | 3/23843 | 0.293373 | 0.623365 | 0.592752 | Tbx1     |
| GO_BP_m1 | GO:002157 | rhombome 1/2606     | 3/23843 | 0.293373 | 0.623365 | 0.592752 | Hoxb1    |
| GO_BP_m1 | GO:002169 | cerebellar c 1/2606 | 3/23843 | 0.293373 | 0.623365 | 0.592752 | Cend1    |
| GO_BP_m1 | GO:002184 | ventricular 1/2606  | 3/23843 | 0.293373 | 0.623365 | 0.592752 | Dct      |
| GO_BP_m1 | GO:002193 | hindbrain t 1/2606  | 3/23843 | 0.293373 | 0.623365 | 0.592752 | Plxna2   |
| GO_BP_m1 | GO:002301 | signal trans 1/2606 | 3/23843 | 0.293373 | 0.623365 | 0.592752 | Osr1     |
| GO_BP_m1 | GO:00302C | dermatan s 1/2606   | 3/23843 | 0.293373 | 0.623365 | 0.592752 | Dse      |
| GO_BP_m1 | GO:003144 | slow-twitch 1/2606  | 3/23843 | 0.293373 | 0.623365 | 0.592752 | Myh7     |
| GO_BP_m1 | GO:003144 | regulation 1/2606   | 3/23843 | 0.293373 | 0.623365 | 0.592752 | Mylk2    |
| GO_BP_m1 | GO:003144 | positive re 1/2606  | 3/23843 | 0.293373 | 0.623365 | 0.592752 | Mylk2    |
| GO_BP_m1 | GO:003247 | otolith mor 1/2606  | 3/23843 | 0.293373 | 0.623365 | 0.592752 | Bloc1s5  |
| GO_BP_m1 | GO:003248 | regulation 1/2606   | 3/23843 | 0.293373 | 0.623365 | 0.592752 | Dennd4b  |
| GO_BP_m1 | GO:003278 | saturated r 1/2606  | 3/23843 | 0.293373 | 0.623365 | 0.592752 | Acot3    |
| GO_BP_m1 | GO:003278 | unsaturate 1/2606   | 3/23843 | 0.293373 | 0.623365 | 0.592752 | Acot3    |
| GO_BP_m1 | GO:003289 | regulation 1/2606   | 3/23843 | 0.293373 | 0.623365 | 0.592752 | Adora1   |
| GO_BP_m1 | GO:003291 | polyamine 1/2606    | 3/23843 | 0.293373 | 0.623365 | 0.592752 | Sat1     |
| GO_BP_m1 | GO:003291 | spermidine 1/2606   | 3/23843 | 0.293373 | 0.623365 | 0.592752 | Sat1     |
| GO_BP_m1 | GO:003312 | negative re 1/2606  | 3/23843 | 0.293373 | 0.623365 | 0.592752 | H2afy    |
| GO_BP_m1 | GO:003361 | mitochond 1/2606    | 3/23843 | 0.293373 | 0.623365 | 0.592752 | Atpaf1   |
| GO_BP_m1 | GO:003386 | negative re 1/2606  | 3/23843 | 0.293373 | 0.623365 | 0.592752 | Drd5     |
| GO_BP_m1 | GO:003428 | detection c 1/2606  | 3/23843 | 0.293373 | 0.623365 | 0.592752 | Foxa2    |
| GO_BP_m1 | GO:003439 | regulation 1/2606   | 3/23843 | 0.293373 | 0.623365 | 0.592752 | Slc40a1  |
| GO_BP_m1 | GO:003442 | post-transl 1/2606  | 3/23843 | 0.293373 | 0.623365 | 0.592752 | Esco1    |
| GO_BP_m1 | GO:003443 | glycoprote 1/2606   | 3/23843 | 0.293373 | 0.623365 | 0.592752 | Vldlr    |
| GO_BP_m1 | GO:003447 | U1 snRNA 1/2606     | 3/23843 | 0.293373 | 0.623365 | 0.592752 | Exosc9   |
| GO_BP_m1 | GO:003447 | U5 snRNA 1/2606     | 3/23843 | 0.293373 | 0.623365 | 0.592752 | Exosc9   |
| GO_BP_m1 | GO:003554 | negative re 1/2606  | 3/23843 | 0.293373 | 0.623365 | 0.592752 | Trim9    |
| GO_BP_m1 | GO:003579 | platelet-de 1/2606  | 3/23843 | 0.293373 | 0.623365 | 0.592752 | Pdgfra   |
| GO_BP_m1 | GO:003579 | positive re 1/2606  | 3/23843 | 0.293373 | 0.623365 | 0.592752 | Pdgfa    |
| GO_BP_m1 | GO:003593 | testosteror 1/2606  | 3/23843 | 0.293373 | 0.623365 | 0.592752 | Igfbp3   |
| GO_BP_m1 | GO:003593 | estradiol s 1/2606  | 3/23843 | 0.293373 | 0.623365 | 0.592752 | Spp1     |

|                                     |         |          |          |          |         |
|-------------------------------------|---------|----------|----------|----------|---------|
| GO_BP_m1GO:003611medium-cl1/2606    | 3/23843 | 0.293373 | 0.623365 | 0.592752 | Hsd17b4 |
| GO_BP_m1GO:003614dendritic c1/2606  | 3/23843 | 0.293373 | 0.623365 | 0.592752 | Gpr183  |
| GO_BP_m1GO:003649positive re1/2606  | 3/23843 | 0.293373 | 0.623365 | 0.592752 | Nck2    |
| GO_BP_m1GO:003808VEGF-activ1/2606   | 3/23843 | 0.293373 | 0.623365 | 0.592752 | Pdgfra  |
| GO_BP_m1GO:003809positive re1/2606  | 3/23843 | 0.293373 | 0.623365 | 0.592752 | Pdgfra  |
| GO_BP_m1GO:003966membrane 1/2606    | 3/23843 | 0.293373 | 0.623365 | 0.592752 | Hyal2   |
| GO_BP_m1GO:004211monocyte 1/2606    | 3/23843 | 0.293373 | 0.623365 | 0.592752 | Hyal2   |
| GO_BP_m1GO:004232negative re1/2606  | 3/23843 | 0.293373 | 0.623365 | 0.592752 | Htr7    |
| GO_BP_m1GO:004236vitamin E n1/2606  | 3/23843 | 0.293373 | 0.623365 | 0.592752 | Pltp    |
| GO_BP_m1GO:004272thiamine-c 1/2606  | 3/23843 | 0.293373 | 0.623365 | 0.592752 | Acpp    |
| GO_BP_m1GO:00433Cregulation 1/2606  | 3/23843 | 0.293373 | 0.623365 | 0.592752 | Stx4a   |
| GO_BP_m1GO:00442C'de novo' A1/2606  | 3/23843 | 0.293373 | 0.623365 | 0.592752 | Adss    |
| GO_BP_m1GO:00443Ecanonical V1/2606  | 3/23843 | 0.293373 | 0.623365 | 0.592752 | Myc     |
| GO_BP_m1GO:004472chromatin 1/2606   | 3/23843 | 0.293373 | 0.623365 | 0.592752 | Tet3    |
| GO_BP_m1GO:00448Cmulti-orga 1/2606  | 3/23843 | 0.293373 | 0.623365 | 0.592752 | Hyal2   |
| GO_BP_m1GO:00448Eprotein loc 1/2606 | 3/23843 | 0.293373 | 0.623365 | 0.592752 | Flot2   |
| GO_BP_m1GO:00448Emodulator 1/2606   | 3/23843 | 0.293373 | 0.623365 | 0.592752 | Nucks1  |
| GO_BP_m1GO:004522extracellula1/2606 | 3/23843 | 0.293373 | 0.623365 | 0.592752 | Has2    |
| GO_BP_m1GO:00453Efarnesyl di1/2606  | 3/23843 | 0.293373 | 0.623365 | 0.592752 | Hmgcs2  |
| GO_BP_m1GO:00453Enegative re1/2606  | 3/23843 | 0.293373 | 0.623365 | 0.592752 | Nmi     |
| GO_BP_m1GO:00453Eregulation 1/2606  | 3/23843 | 0.293373 | 0.623365 | 0.592752 | Ccl20   |
| GO_BP_m1GO:00453Epositive re1/2606  | 3/23843 | 0.293373 | 0.623365 | 0.592752 | Ccl20   |
| GO_BP_m1GO:004557basophil ac1/2606  | 3/23843 | 0.293373 | 0.623365 | 0.592752 | Kars    |
| GO_BP_m1GO:004562negative re1/2606  | 3/23843 | 0.293373 | 0.623365 | 0.592752 | Jak3    |
| GO_BP_m1GO:00456Eregulation 1/2606  | 3/23843 | 0.293373 | 0.623365 | 0.592752 | Trib1   |
| GO_BP_m1GO:00457Epositive re1/2606  | 3/23843 | 0.293373 | 0.623365 | 0.592752 | Tpr     |
| GO_BP_m1GO:00460Cpositive re1/2606  | 3/23843 | 0.293373 | 0.623365 | 0.592752 | Uts2r   |
| GO_BP_m1GO:00460EdATP cata1/2606    | 3/23843 | 0.293373 | 0.623365 | 0.592752 | Nudt1   |
| GO_BP_m1GO:004607dTMP met1/2606     | 3/23843 | 0.293373 | 0.623365 | 0.592752 | Shmt1   |
| GO_BP_m1GO:00460Eguanine m1/2606    | 3/23843 | 0.293373 | 0.623365 | 0.592752 | Gda     |
| GO_BP_m1GO:00461Cthymidine 1/2606   | 3/23843 | 0.293373 | 0.623365 | 0.592752 | Dpyd    |
| GO_BP_m1GO:00461Epositive re1/2606  | 3/23843 | 0.293373 | 0.623365 | 0.592752 | lfng    |
| GO_BP_m1GO:004637extracellula1/2606 | 3/23843 | 0.293373 | 0.623365 | 0.592752 | Has2    |
| GO_BP_m1GO:004641D-amino a 1/2606   | 3/23843 | 0.293373 | 0.623365 | 0.592752 | Ddo     |
| GO_BP_m1GO:00466Cpositive re1/2606  | 3/23843 | 0.293373 | 0.623365 | 0.592752 | Plk4    |
| GO_BP_m1GO:00469Epositive re1/2606  | 3/23843 | 0.293373 | 0.623365 | 0.592752 | Prmt1   |
| GO_BP_m1GO:00481Emulti-layer 1/2606 | 3/23843 | 0.293373 | 0.623365 | 0.592752 | Amh     |
| GO_BP_m1GO:004832axial meso1/2606   | 3/23843 | 0.293373 | 0.623365 | 0.592752 | Epha2   |
| GO_BP_m1GO:00486Eregulation 1/2606  | 3/23843 | 0.293373 | 0.623365 | 0.592752 | Wnt3a   |
| GO_BP_m1GO:00488Estem cell f1/2606  | 3/23843 | 0.293373 | 0.623365 | 0.592752 | Sox18   |
| GO_BP_m1GO:00508Emusculosk1/2606    | 3/23843 | 0.293373 | 0.623365 | 0.592752 | Drd3    |
| GO_BP_m1GO:005131attachmen1/2606    | 3/23843 | 0.293373 | 0.623365 | 0.592752 | Cenpc1  |
| GO_BP_m1GO:00514Epositive re1/2606  | 3/23843 | 0.293373 | 0.623365 | 0.592752 | Tnfsf11 |
| GO_BP_m1GO:00515Edetection c 1/2606 | 3/23843 | 0.293373 | 0.623365 | 0.592752 | Foxa2   |
| GO_BP_m1GO:00515Eresponse tr1/2606  | 3/23843 | 0.293373 | 0.623365 | 0.592752 | Atp2b4  |
| GO_BP_m1GO:00550Elipoprotein 1/2606 | 3/23843 | 0.293373 | 0.623365 | 0.592752 | Cd36    |
| GO_BP_m1GO:00550Elow-densit1/2606   | 3/23843 | 0.293373 | 0.623365 | 0.592752 | Cd36    |
| GO_BP_m1GO:00601Eolfactory p 1/2606 | 3/23843 | 0.293373 | 0.623365 | 0.592752 | Aldh1a3 |

|                                     |         |          |          |          |         |
|-------------------------------------|---------|----------|----------|----------|---------|
| GO_BP_m1GO:006016positive re1/2606  | 3/23843 | 0.293373 | 0.623365 | 0.592752 | Acpp    |
| GO_BP_m1GO:006039negative re1/2606  | 3/23843 | 0.293373 | 0.623365 | 0.592752 | Pbld1   |
| GO_BP_m1GO:006045positive re1/2606  | 3/23843 | 0.293373 | 0.623365 | 0.592752 | Oprl1   |
| GO_BP_m1GO:006046left lung m1/2606  | 3/23843 | 0.293373 | 0.623365 | 0.592752 | Cfc1    |
| GO_BP_m1GO:006055positive re1/2606  | 3/23843 | 0.293373 | 0.623365 | 0.592752 | lfng    |
| GO_BP_m1GO:006055positive re1/2606  | 3/23843 | 0.293373 | 0.623365 | 0.592752 | lfng    |
| GO_BP_m1GO:006082fibroblast c1/2606 | 3/23843 | 0.293373 | 0.623365 | 0.592752 | Nog     |
| GO_BP_m1GO:006091cardiac cell1/2606 | 3/23843 | 0.293373 | 0.623365 | 0.592752 | Wnt3a   |
| GO_BP_m1GO:006098lipid tube a1/2606 | 3/23843 | 0.293373 | 0.623365 | 0.592752 | Snx9    |
| GO_BP_m1GO:006118regulation 1/2606  | 3/23843 | 0.293373 | 0.623365 | 0.592752 | Rflna   |
| GO_BP_m1GO:006118positive re1/2606  | 3/23843 | 0.293373 | 0.623365 | 0.592752 | Wnt3a   |
| GO_BP_m1GO:006131canonical v1/2606  | 3/23843 | 0.293373 | 0.623365 | 0.592752 | Wnt3a   |
| GO_BP_m1GO:006150early endo1/2606   | 3/23843 | 0.293373 | 0.623365 | 0.592752 | Dnajc13 |
| GO_BP_m1GO:006162fructose ca1/2606  | 3/23843 | 0.293373 | 0.623365 | 0.592752 | Tkfc    |
| GO_BP_m1GO:006162glycolytic p1/2606 | 3/23843 | 0.293373 | 0.623365 | 0.592752 | Tkfc    |
| GO_BP_m1GO:006189positive re1/2606  | 3/23843 | 0.293373 | 0.623365 | 0.592752 | Ttbk1   |
| GO_BP_m1GO:006194regulation 1/2606  | 3/23843 | 0.293373 | 0.623365 | 0.592752 | Nmi     |
| GO_BP_m1GO:007038DNA cytos1/2606    | 3/23843 | 0.293373 | 0.623365 | 0.592752 | Apobec1 |
| GO_BP_m1GO:007042negative re1/2606  | 3/23843 | 0.293373 | 0.623365 | 0.592752 | Ptpn22  |
| GO_BP_m1GO:007042regulation 1/2606  | 3/23843 | 0.293373 | 0.623365 | 0.592752 | Peli3   |
| GO_BP_m1GO:007043negative re1/2606  | 3/23843 | 0.293373 | 0.623365 | 0.592752 | Ptpn22  |
| GO_BP_m1GO:007046thyroid-stir1/2606 | 3/23843 | 0.293373 | 0.623365 | 0.592752 | Dio2    |
| GO_BP_m1GO:007048T cell aggr1/2606  | 3/23843 | 0.293373 | 0.623365 | 0.592752 | Adam8   |
| GO_BP_m1GO:007049regulation 1/2606  | 3/23843 | 0.293373 | 0.623365 | 0.592752 | Snca    |
| GO_BP_m1GO:007049negative re1/2606  | 3/23843 | 0.293373 | 0.623365 | 0.592752 | Snca    |
| GO_BP_m1GO:007053histone H2.1/2606  | 3/23843 | 0.293373 | 0.623365 | 0.592752 | Uimc1   |
| GO_BP_m1GO:007053dendrite se1/2606  | 3/23843 | 0.293373 | 0.623365 | 0.592752 | Dscaml1 |
| GO_BP_m1GO:007063transepithe1/2606  | 3/23843 | 0.293373 | 0.623365 | 0.592752 | Slc12a2 |
| GO_BP_m1GO:007067intralumen 1/2606  | 3/23843 | 0.293373 | 0.623365 | 0.592752 | Park2   |
| GO_BP_m1GO:007068proteasom 1/2606   | 3/23843 | 0.293373 | 0.623365 | 0.592752 | Psmd9   |
| GO_BP_m1GO:007096positive re1/2606  | 3/23843 | 0.293373 | 0.623365 | 0.592752 | Arg1    |
| GO_BP_m1GO:007096positive re1/2606  | 3/23843 | 0.293373 | 0.623365 | 0.592752 | Arg1    |
| GO_BP_m1GO:007131cellular res1/2606 | 3/23843 | 0.293373 | 0.623365 | 0.592752 | Crhbp   |
| GO_BP_m1GO:007161granzyme l1/2606   | 3/23843 | 0.293373 | 0.623365 | 0.592752 | Ptpn22  |
| GO_BP_m1GO:007165negative re1/2606  | 3/23843 | 0.293373 | 0.623365 | 0.592752 | Ticam2  |
| GO_BP_m1GO:007166regulation 1/2606  | 3/23843 | 0.293373 | 0.623365 | 0.592752 | Ptpn22  |
| GO_BP_m1GO:007166positive re1/2606  | 3/23843 | 0.293373 | 0.623365 | 0.592752 | Ptpn22  |
| GO_BP_m1GO:007187response tr1/2606  | 3/23843 | 0.293373 | 0.623365 | 0.592752 | Rnls    |
| GO_BP_m1GO:007196establishm1/2606   | 3/23843 | 0.293373 | 0.623365 | 0.592752 | Cfl1    |
| GO_BP_m1GO:007206DCT cell di1/2606  | 3/23843 | 0.293373 | 0.623365 | 0.592752 | Pou3f3  |
| GO_BP_m1GO:007219ureter urot1/2606  | 3/23843 | 0.293373 | 0.623365 | 0.592752 | Osr1    |
| GO_BP_m1GO:007219kidney smc1/2606   | 3/23843 | 0.293373 | 0.623365 | 0.592752 | Osr1    |
| GO_BP_m1GO:007224metaneph1/2606     | 3/23843 | 0.293373 | 0.623365 | 0.592752 | Pou3f3  |
| GO_BP_m1GO:007224metaneph1/2606     | 3/23843 | 0.293373 | 0.623365 | 0.592752 | Lamb2   |
| GO_BP_m1GO:007227metaneph1/2606     | 3/23843 | 0.293373 | 0.623365 | 0.592752 | Pdgfra  |
| GO_BP_m1GO:007227metaneph1/2606     | 3/23843 | 0.293373 | 0.623365 | 0.592752 | Pdgfra  |
| GO_BP_m1GO:007227metaneph1/2606     | 3/23843 | 0.293373 | 0.623365 | 0.592752 | Pdgfra  |
| GO_BP_m1GO:007228metaneph1/2606     | 3/23843 | 0.293373 | 0.623365 | 0.592752 | Wt1     |

|                   |                        |        |         |          |          |          |         |
|-------------------|------------------------|--------|---------|----------|----------|----------|---------|
| GO_BP_m1GO:007256 | chemokine              | 1/2606 | 3/23843 | 0.293373 | 0.623365 | 0.592752 | Trpv4   |
| GO_BP_m1GO:007270 | response to            | 1/2606 | 3/23843 | 0.293373 | 0.623365 | 0.592752 | Mapk13  |
| GO_BP_m1GO:007271 | cellular response to   | 1/2606 | 3/23843 | 0.293373 | 0.623365 | 0.592752 | Rpl23   |
| GO_BP_m1GO:007272 | response to            | 1/2606 | 3/23843 | 0.293373 | 0.623365 | 0.592752 | Casp6   |
| GO_BP_m1GO:007273 | cellular response to   | 1/2606 | 3/23843 | 0.293373 | 0.623365 | 0.592752 | Casp6   |
| GO_BP_m1GO:007550 | endocytosis            | 1/2606 | 3/23843 | 0.293373 | 0.623365 | 0.592752 | Cav1    |
| GO_BP_m1GO:007573 | intracellular          | 1/2606 | 3/23843 | 0.293373 | 0.623365 | 0.592752 | Fmr1    |
| GO_BP_m1GO:008605 | AV node                | 1/2606 | 3/23843 | 0.293373 | 0.623365 | 0.592752 | Gjc1    |
| GO_BP_m1GO:009020 | protein localization   | 1/2606 | 3/23843 | 0.293373 | 0.623365 | 0.592752 | Osbp18  |
| GO_BP_m1GO:009021 | regulation of          | 1/2606 | 3/23843 | 0.293373 | 0.623365 | 0.592752 | Adgra2  |
| GO_BP_m1GO:009027 | positive regulation of | 1/2606 | 3/23843 | 0.293373 | 0.623365 | 0.592752 | Ptgs2   |
| GO_BP_m1GO:009029 | negative regulation of | 1/2606 | 3/23843 | 0.293373 | 0.623365 | 0.592752 | Lig3    |
| GO_BP_m1GO:009031 | negative regulation of | 1/2606 | 3/23843 | 0.293373 | 0.623365 | 0.592752 | Apobec1 |
| GO_BP_m1GO:009036 | platelet-derived       | 1/2606 | 3/23843 | 0.293373 | 0.623365 | 0.592752 | Ptgs2   |
| GO_BP_m1GO:009036 | regulation of          | 1/2606 | 3/23843 | 0.293373 | 0.623365 | 0.592752 | Ptgs2   |
| GO_BP_m1GO:009048 | purine nucleotide      | 1/2606 | 3/23843 | 0.293373 | 0.623365 | 0.592752 | Slc35c1 |
| GO_BP_m1GO:009711 | gamma-aminobutyrate    | 1/2606 | 3/23843 | 0.293373 | 0.623365 | 0.592752 | Gphn    |
| GO_BP_m1GO:009711 | neuroleptin            | 1/2606 | 3/23843 | 0.293373 | 0.623365 | 0.592752 | Cdh2    |
| GO_BP_m1GO:009717 | epoxide metabolism     | 1/2606 | 3/23843 | 0.293373 | 0.623365 | 0.592752 | Ephx2   |
| GO_BP_m1GO:009719 | pilomotor              | 1/2606 | 3/23843 | 0.293373 | 0.623365 | 0.592752 | Npnt    |
| GO_BP_m1GO:009721 | regulation of          | 1/2606 | 3/23843 | 0.293373 | 0.623365 | 0.592752 | Mt3     |
| GO_BP_m1GO:009769 | establishment of       | 1/2606 | 3/23843 | 0.293373 | 0.623365 | 0.592752 | Atr     |
| GO_BP_m1GO:009876 | mitotic cell           | 1/2606 | 3/23843 | 0.293373 | 0.623365 | 0.592752 | Cdc20   |
| GO_BP_m1GO:009891 | membrane               | 1/2606 | 3/23843 | 0.293373 | 0.623365 | 0.592752 | Cacnb2  |
| GO_BP_m1GO:009907 | mitochondrial          | 1/2606 | 3/23843 | 0.293373 | 0.623365 | 0.592752 | Park2   |
| GO_BP_m1GO:009907 | mitochondrial          | 1/2606 | 3/23843 | 0.293373 | 0.623365 | 0.592752 | Park2   |
| GO_BP_m1GO:009908 | retrograde             | 1/2606 | 3/23843 | 0.293373 | 0.623365 | 0.592752 | Ntf5    |
| GO_BP_m1GO:009917 | postsynaptic           | 1/2606 | 3/23843 | 0.293373 | 0.623365 | 0.592752 | Fmr1    |
| GO_BP_m1GO:009954 | regulation of          | 1/2606 | 3/23843 | 0.293373 | 0.623365 | 0.592752 | Fmr1    |
| GO_BP_m1GO:009955 | trans-synaptic         | 1/2606 | 3/23843 | 0.293373 | 0.623365 | 0.592752 | Ntf5    |
| GO_BP_m1GO:009955 | maintenance of         | 1/2606 | 3/23843 | 0.293373 | 0.623365 | 0.592752 | C1ql1   |
| GO_BP_m1GO:009957 | regulation of          | 1/2606 | 3/23843 | 0.293373 | 0.623365 | 0.592752 | Fmr1    |
| GO_BP_m1GO:010602 | regulation of          | 1/2606 | 3/23843 | 0.293373 | 0.623365 | 0.592752 | Ncam1   |
| GO_BP_m1GO:190004 | negative regulation of | 1/2606 | 3/23843 | 0.293373 | 0.623365 | 0.592752 | Ezr     |
| GO_BP_m1GO:190015 | regulation of          | 1/2606 | 3/23843 | 0.293373 | 0.623365 | 0.592752 | Arg1    |
| GO_BP_m1GO:190023 | regulation of          | 1/2606 | 3/23843 | 0.293373 | 0.623365 | 0.592752 | Pdgfra  |
| GO_BP_m1GO:190036 | positive regulation of | 1/2606 | 3/23843 | 0.293373 | 0.623365 | 0.592752 | Cpeb3   |
| GO_BP_m1GO:190062 | regulation of          | 1/2606 | 3/23843 | 0.293373 | 0.623365 | 0.592752 | Has2    |
| GO_BP_m1GO:190062 | positive regulation of | 1/2606 | 3/23843 | 0.293373 | 0.623365 | 0.592752 | Has2    |
| GO_BP_m1GO:190100 | negative regulation of | 1/2606 | 3/23843 | 0.293373 | 0.623365 | 0.592752 | Tigar   |
| GO_BP_m1GO:190125 | regulation of          | 1/2606 | 3/23843 | 0.293373 | 0.623365 | 0.592752 | Fmr1    |
| GO_BP_m1GO:190153 | positive regulation of | 1/2606 | 3/23843 | 0.293373 | 0.623365 | 0.592752 | Foxc1   |
| GO_BP_m1GO:190174 | negative regulation of | 1/2606 | 3/23843 | 0.293373 | 0.623365 | 0.592752 | Cxcl10  |
| GO_BP_m1GO:190184 | regulation of          | 1/2606 | 3/23843 | 0.293373 | 0.623365 | 0.592752 | Cav1    |
| GO_BP_m1GO:190185 | negative regulation of | 1/2606 | 3/23843 | 0.293373 | 0.623365 | 0.592752 | Flcn    |
| GO_BP_m1GO:190187 | regulation of          | 1/2606 | 3/23843 | 0.293373 | 0.623365 | 0.592752 | Flcn    |
| GO_BP_m1GO:190187 | negative regulation of | 1/2606 | 3/23843 | 0.293373 | 0.623365 | 0.592752 | Flcn    |
| GO_BP_m1GO:190197 | regulation of          | 1/2606 | 3/23843 | 0.293373 | 0.623365 | 0.592752 | Cav1    |

|                   |                     |         |          |          |          |        |
|-------------------|---------------------|---------|----------|----------|----------|--------|
| GO_BP_m1GO:19019  | negative re1/2606   | 3/23843 | 0.293373 | 0.623365 | 0.592752 | Ttk    |
| GO_BP_m1GO:190217 | positive re1/2606   | 3/23843 | 0.293373 | 0.623365 | 0.592752 | Gsn    |
| GO_BP_m1GO:19022  | regulation 1/2606   | 3/23843 | 0.293373 | 0.623365 | 0.592752 | Foxc1  |
| GO_BP_m1GO:19022  | negative re1/2606   | 3/23843 | 0.293373 | 0.623365 | 0.592752 | Oaz1   |
| GO_BP_m1GO:190252 | positive re1/2606   | 3/23843 | 0.293373 | 0.623365 | 0.592752 | Ptpn22 |
| GO_BP_m1GO:190252 | positive re1/2606   | 3/23843 | 0.293373 | 0.623365 | 0.592752 | Pdcd6  |
| GO_BP_m1GO:19025  | negative re1/2606   | 3/23843 | 0.293373 | 0.623365 | 0.592752 | Bcr    |
| GO_BP_m1GO:19026  | regulation 1/2606   | 3/23843 | 0.293373 | 0.623365 | 0.592752 | Nptn   |
| GO_BP_m1GO:19026  | regulation 1/2606   | 3/23843 | 0.293373 | 0.623365 | 0.592752 | Tigar  |
| GO_BP_m1GO:190272 | positive re1/2606   | 3/23843 | 0.293373 | 0.623365 | 0.592752 | Abat   |
| GO_BP_m1GO:190277 | mitochond 1/2606    | 3/23843 | 0.293373 | 0.623365 | 0.592752 | Dhx30  |
| GO_BP_m1GO:19029  | mitotic telc 1/2606 | 3/23843 | 0.293373 | 0.623365 | 0.592752 | Pcna   |
| GO_BP_m1GO:190307 | negative re1/2606   | 3/23843 | 0.293373 | 0.623365 | 0.592752 | Usp14  |
| GO_BP_m1GO:19032  | negative re1/2606   | 3/23843 | 0.293373 | 0.623365 | 0.592752 | Ccl28  |
| GO_BP_m1GO:190327 | regulation 1/2606   | 3/23843 | 0.293373 | 0.623365 | 0.592752 | Slc9a1 |
| GO_BP_m1GO:19032  | positive re1/2606   | 3/23843 | 0.293373 | 0.623365 | 0.592752 | Atp1b2 |
| GO_BP_m1GO:190334 | positive re1/2606   | 3/23843 | 0.293373 | 0.623365 | 0.592752 | Cldn1  |
| GO_BP_m1GO:190337 | positive re1/2606   | 3/23843 | 0.293373 | 0.623365 | 0.592752 | Ralbp1 |
| GO_BP_m1GO:190342 | negative re1/2606   | 3/23843 | 0.293373 | 0.623365 | 0.592752 | Stx1b  |
| GO_BP_m1GO:190354 | negative re1/2606   | 3/23843 | 0.293373 | 0.623365 | 0.592752 | Park2  |
| GO_BP_m1GO:19035  | positive re1/2606   | 3/23843 | 0.293373 | 0.623365 | 0.592752 | Cav1   |
| GO_BP_m1GO:190362 | negative re1/2606   | 3/23843 | 0.293373 | 0.623365 | 0.592752 | Dffa   |
| GO_BP_m1GO:190367 | regulation 1/2606   | 3/23843 | 0.293373 | 0.623365 | 0.592752 | Ythdf2 |
| GO_BP_m1GO:190367 | positive re1/2606   | 3/23843 | 0.293373 | 0.623365 | 0.592752 | Ythdf2 |
| GO_BP_m1GO:190371 | regulation 1/2606   | 3/23843 | 0.293373 | 0.623365 | 0.592752 | Ddrgk1 |
| GO_BP_m1GO:190372 | positive re1/2606   | 3/23843 | 0.293373 | 0.623365 | 0.592752 | Ddrgk1 |
| GO_BP_m1GO:190392 | primary pa 1/2606   | 3/23843 | 0.293373 | 0.623365 | 0.592752 | Ift88  |
| GO_BP_m1GO:19039  | positive re1/2606   | 3/23843 | 0.293373 | 0.623365 | 0.592752 | Atf3   |
| GO_BP_m1GO:190402 | regulation 1/2606   | 3/23843 | 0.293373 | 0.623365 | 0.592752 | Tigar  |
| GO_BP_m1GO:19040  | negative re1/2606   | 3/23843 | 0.293373 | 0.623365 | 0.592752 | Il10   |
| GO_BP_m1GO:19040  | regulation 1/2606   | 3/23843 | 0.293373 | 0.623365 | 0.592752 | Oprl1  |
| GO_BP_m1GO:19041  | positive re1/2606   | 3/23843 | 0.293373 | 0.623365 | 0.592752 | Bcap31 |
| GO_BP_m1GO:19043  | negative re1/2606   | 3/23843 | 0.293373 | 0.623365 | 0.592752 | Wnt3a  |
| GO_BP_m1GO:19043  | endoplasm 1/2606    | 3/23843 | 0.293373 | 0.623365 | 0.592752 | Man1b1 |
| GO_BP_m1GO:19046  | positive re1/2606   | 3/23843 | 0.293373 | 0.623365 | 0.592752 | Ythdf2 |
| GO_BP_m1GO:19046  | negative re1/2606   | 3/23843 | 0.293373 | 0.623365 | 0.592752 | Dock4  |
| GO_BP_m1GO:19047  | positive re1/2606   | 3/23843 | 0.293373 | 0.623365 | 0.592752 | Cfl1   |
| GO_BP_m1GO:19048  | response tr1/2606   | 3/23843 | 0.293373 | 0.623365 | 0.592752 | Park2  |
| GO_BP_m1GO:19048  | cellular res1/2606  | 3/23843 | 0.293373 | 0.623365 | 0.592752 | Park2  |
| GO_BP_m1GO:19056  | regulation 1/2606   | 3/23843 | 0.293373 | 0.623365 | 0.592752 | Snca   |
| GO_BP_m1GO:200031 | regulation 1/2606   | 3/23843 | 0.293373 | 0.623365 | 0.592752 | Nog    |
| GO_BP_m1GO:20003  | regulation 1/2606   | 3/23843 | 0.293373 | 0.623365 | 0.592752 | Trpv4  |
| GO_BP_m1GO:200037 | regulation 1/2606   | 3/23843 | 0.293373 | 0.623365 | 0.592752 | Mt3    |
| GO_BP_m1GO:200041 | positive re1/2606   | 3/23843 | 0.293373 | 0.623365 | 0.592752 | Adam8  |
| GO_BP_m1GO:200044 | regulation 1/2606   | 3/23843 | 0.293373 | 0.623365 | 0.592752 | Ripk3  |
| GO_BP_m1GO:20004  | regulation 1/2606   | 3/23843 | 0.293373 | 0.623365 | 0.592752 | Snca   |
| GO_BP_m1GO:20005  | negative re1/2606   | 3/23843 | 0.293373 | 0.623365 | 0.592752 | Arg1   |
| GO_BP_m1GO:20005  | positive re1/2606   | 3/23843 | 0.293373 | 0.623365 | 0.592752 | Pdgfa  |

|                                     |           |          |          |          |               |
|-------------------------------------|-----------|----------|----------|----------|---------------|
| GO_BP_m1GO:200064negative re1/2606  | 3/23843   | 0.293373 | 0.623365 | 0.592752 | Anxa2         |
| GO_BP_m1GO:200067positive re1/2606  | 3/23843   | 0.293373 | 0.623365 | 0.592752 | Jak3          |
| GO_BP_m1GO:200070regulation 1/2606  | 3/23843   | 0.293373 | 0.623365 | 0.592752 | Prkca         |
| GO_BP_m1GO:200072positive re1/2606  | 3/23843   | 0.293373 | 0.623365 | 0.592752 | Npnt          |
| GO_BP_m1GO:200081regulation 1/2606  | 3/23843   | 0.293373 | 0.623365 | 0.592752 | Cul4a         |
| GO_BP_m1GO:200084regulation 1/2606  | 3/23843   | 0.293373 | 0.623365 | 0.592752 | Igfbp3        |
| GO_BP_m1GO:200086regulation 1/2606  | 3/23843   | 0.293373 | 0.623365 | 0.592752 | Spp1          |
| GO_BP_m1GO:200128positive re1/2606  | 3/23843   | 0.293373 | 0.623365 | 0.592752 | Cav3          |
| GO_BP_m1GO:001569inorganic a17/2606 | 134/23843 | 0.294299 | 0.62518  | 0.594479 | Abcb1a/Ar     |
| GO_BP_m1GO:005501cardiac mu11/2606  | 83/23843  | 0.295584 | 0.625459 | 0.594743 | Akap6/Cav     |
| GO_BP_m1GO:005109positive re15/2606 | 117/23843 | 0.29572  | 0.625459 | 0.594743 | Adam8/Ar      |
| GO_BP_m1GO:005149positive re26/2606 | 212/23843 | 0.296139 | 0.625459 | 0.594743 | Ankrd53/Bi    |
| GO_BP_m1GO:005070regulation 23/2606 | 186/23843 | 0.296591 | 0.625459 | 0.594743 | Abl2/Btnl2,   |
| GO_BP_m1GO:000194heart loopi8/2606  | 58/23843  | 0.297917 | 0.625459 | 0.594743 | Cfc1/Dnaa1    |
| GO_BP_m1GO:004663regulation 8/2606  | 58/23843  | 0.297917 | 0.625459 | 0.594743 | Irfng/Il2rg/J |
| GO_BP_m1GO:006003cardiac mu8/2606   | 58/23843  | 0.297917 | 0.625459 | 0.594743 | Cdk1/Fgf1/    |
| GO_BP_m1GO:190379positive re8/2606  | 58/23843  | 0.297917 | 0.625459 | 0.594743 | Abat/Abcb     |
| GO_BP_m1GO:000005ribosomal l2/2606  | 10/23843  | 0.300055 | 0.625459 | 0.594743 | Nmd3/Zfp!     |
| GO_BP_m1GO:000217male germ 2/2606   | 10/23843  | 0.300055 | 0.625459 | 0.594743 | Cib1/Dmrt:    |
| GO_BP_m1GO:000293desmosom2/2606     | 10/23843  | 0.300055 | 0.625459 | 0.594743 | Perp/Prkca    |
| GO_BP_m1GO:000314membrano2/2606     | 10/23843  | 0.300055 | 0.625459 | 0.594743 | Nog/Nsd2      |
| GO_BP_m1GO:000600fructose m2/2606   | 10/23843  | 0.300055 | 0.625459 | 0.594743 | Pfkfb1/Tkfc   |
| GO_BP_m1GO:000600fructose 6-2/2606  | 10/23843  | 0.300055 | 0.625459 | 0.594743 | Gfpt2/Pfkl    |
| GO_BP_m1GO:000600glucose cat2/2606  | 10/23843  | 0.300055 | 0.625459 | 0.594743 | Ldha/Tigar    |
| GO_BP_m1GO:000628transcriptic2/2606 | 10/23843  | 0.300055 | 0.625459 | 0.594743 | Ercc5/Usp7    |
| GO_BP_m1GO:000652regulation 2/2606  | 10/23843  | 0.300055 | 0.625459 | 0.594743 | Atp2b4/Slc    |
| GO_BP_m1GO:000659ornithine r2/2606  | 10/23843  | 0.300055 | 0.625459 | 0.594743 | Arg1/Otc      |
| GO_BP_m1GO:000722Notch rece2/2606   | 10/23843  | 0.300055 | 0.625459 | 0.594743 | Aph1a/Ap!     |
| GO_BP_m1GO:000930snRNA trar2/2606   | 10/23843  | 0.300055 | 0.625459 | 0.594743 | Ell2/Ice1     |
| GO_BP_m1GO:000965UV protect 2/2606  | 10/23843  | 0.300055 | 0.625459 | 0.594743 | Ercc5/Gpx1    |
| GO_BP_m1GO:001004response tr2/2606  | 10/23843  | 0.300055 | 0.625459 | 0.594743 | Atp7b/Fibri   |
| GO_BP_m1GO:001083positive re2/2606  | 10/23843  | 0.300055 | 0.625459 | 0.594743 | Fgf7/Has2     |
| GO_BP_m1GO:001091negative re2/2606  | 10/23843  | 0.300055 | 0.625459 | 0.594743 | Arl6ip5/Bni   |
| GO_BP_m1GO:001098regulation 2/2606  | 10/23843  | 0.300055 | 0.625459 | 0.594743 | Anxa2/Pcsl    |
| GO_BP_m1GO:001482artery smo2/2606   | 10/23843  | 0.300055 | 0.625459 | 0.594743 | Bbs2/Smpc     |
| GO_BP_m1GO:0019474-hydroxy2/2606    | 10/23843  | 0.300055 | 0.625459 | 0.594743 | Egln3/Ero1    |
| GO_BP_m1GO:002155optic nerve2/2606  | 10/23843  | 0.300055 | 0.625459 | 0.594743 | Ephb1/Kcn     |
| GO_BP_m1GO:002161facial nerve2/2606 | 10/23843  | 0.300055 | 0.625459 | 0.594743 | Hoxb1/Sen     |
| GO_BP_m1GO:002182substrate-i 2/2606 | 10/23843  | 0.300055 | 0.625459 | 0.594743 | Arx/Nrg1      |
| GO_BP_m1GO:002184substrate-i 2/2606 | 10/23843  | 0.300055 | 0.625459 | 0.594743 | Arx/Nrg1      |
| GO_BP_m1GO:002202interkinetic2/2606 | 10/23843  | 0.300055 | 0.625459 | 0.594743 | Dock7/Tac     |
| GO_BP_m1GO:003004muscle filar2/2606 | 10/23843  | 0.300055 | 0.625459 | 0.594743 | Myh7/Mylk     |
| GO_BP_m1GO:003085negative re2/2606  | 10/23843  | 0.300055 | 0.625459 | 0.594743 | Cul4a/Trib1   |
| GO_BP_m1GO:003094negative re2/2606  | 10/23843  | 0.300055 | 0.625459 | 0.594743 | Pdcd6/Ptp     |
| GO_BP_m1GO:003184protection 2/2606  | 10/23843  | 0.300055 | 0.625459 | 0.594743 | Dclre1a/Xr    |
| GO_BP_m1GO:003207positive re2/2606  | 10/23843  | 0.300055 | 0.625459 | 0.594743 | Pcna/Vapb     |
| GO_BP_m1GO:003235response tr2/2606  | 10/23843  | 0.300055 | 0.625459 | 0.594743 | Epha8/Ppa     |
| GO_BP_m1GO:003321leptin-mec2/2606   | 10/23843  | 0.300055 | 0.625459 | 0.594743 | Bbs2/Mt3      |

|                                      |           |          |          |          |             |
|--------------------------------------|-----------|----------|----------|----------|-------------|
| GO_BP_m1GO:003411negative re2/2606   | 10/23843  | 0.300055 | 0.625459 | 0.594743 | Il10/Il1rn  |
| GO_BP_m1GO:003414positive re2/2606   | 10/23843  | 0.300055 | 0.625459 | 0.594743 | Ptpn22/Tic  |
| GO_BP_m1GO:003509spermatog 2/2606    | 10/23843  | 0.300055 | 0.625459 | 0.594743 | Psme4/Syc   |
| GO_BP_m1GO:003543phosphate 2/2606    | 10/23843  | 0.300055 | 0.625459 | 0.594743 | Ank/Slc20a  |
| GO_BP_m1GO:003573hepatic ste 2/2606  | 10/23843  | 0.300055 | 0.625459 | 0.594743 | Acta2/Dga   |
| GO_BP_m1GO:003644calcium im2/2606    | 10/23843  | 0.300055 | 0.625459 | 0.594743 | Micu2/Slc2  |
| GO_BP_m1GO:004209interleukin-2/2606  | 10/23843  | 0.300055 | 0.625459 | 0.594743 | lfng/Nfkb1  |
| GO_BP_m1GO:004415histone H3 2/2606   | 10/23843  | 0.300055 | 0.625459 | 0.594743 | Kat2a/Kat2  |
| GO_BP_m1GO:004507regulation 2/2606   | 10/23843  | 0.300055 | 0.625459 | 0.594743 | lfng/Nfkb1  |
| GO_BP_m1GO:004648ether lipid 2/2606  | 10/23843  | 0.300055 | 0.625459 | 0.594743 | Fasn/Tmen   |
| GO_BP_m1GO:004809chromatin-2/2606    | 10/23843  | 0.300055 | 0.625459 | 0.594743 | Ash2l/Pabp  |
| GO_BP_m1GO:004867negative re2/2606   | 10/23843  | 0.300055 | 0.625459 | 0.594743 | Epha7/Fgf1  |
| GO_BP_m1GO:00487Cembryonic 2/2606    | 10/23843  | 0.300055 | 0.625459 | 0.594743 | Mthfd1l/Tb  |
| GO_BP_m1GO:005117meiotic sist2/2606  | 10/23843  | 0.300055 | 0.625459 | 0.594743 | Ppp2r1a/Sy  |
| GO_BP_m1GO:005129nuclear poi2/2606   | 10/23843  | 0.300055 | 0.625459 | 0.594743 | Ahctf1/Nuq  |
| GO_BP_m1GO:006029regulation 2/2606   | 10/23843  | 0.300055 | 0.625459 | 0.594743 | Cav3/Hdac   |
| GO_BP_m1GO:006063regulation 2/2606   | 10/23843  | 0.300055 | 0.625459 | 0.594743 | Dmrt1/Fbx   |
| GO_BP_m1GO:006108regulation 2/2606   | 10/23843  | 0.300055 | 0.625459 | 0.594743 | H2afy/Ogt   |
| GO_BP_m1GO:007052tRNA threc2/2606    | 10/23843  | 0.300055 | 0.625459 | 0.594743 | Osgpl1/Tr   |
| GO_BP_m1GO:007058regulation 2/2606   | 10/23843  | 0.300055 | 0.625459 | 0.594743 | Il10/Il1rn  |
| GO_BP_m1GO:007107positive re2/2606   | 10/23843  | 0.300055 | 0.625459 | 0.594743 | Fpr2/Pcx    |
| GO_BP_m1GO:007201distal tubul2/2606  | 10/23843  | 0.300055 | 0.625459 | 0.594743 | Jag1/Pou3f  |
| GO_BP_m1GO:007271response tr2/2606   | 10/23843  | 0.300055 | 0.625459 | 0.594743 | Blm/Fmr1    |
| GO_BP_m1GO:00800C mRNA met2/2606     | 10/23843  | 0.300055 | 0.625459 | 0.594743 | Virma/Cmt   |
| GO_BP_m1GO:009004tubulin dec2/2606   | 10/23843  | 0.300055 | 0.625459 | 0.594743 | Fnta/Nek3   |
| GO_BP_m1GO:00902C negative re2/2606  | 10/23843  | 0.300055 | 0.625459 | 0.594743 | Apobec1/P   |
| GO_BP_m1GO:00902E negative re2/2606  | 10/23843  | 0.300055 | 0.625459 | 0.594743 | Hrc/Mrln    |
| GO_BP_m1GO:009034positive re2/2606   | 10/23843  | 0.300055 | 0.625459 | 0.594743 | Mb21d1/Yj   |
| GO_BP_m1GO:00904E pyrimidine 2/2606  | 10/23843  | 0.300055 | 0.625459 | 0.594743 | Slc35a5/Slc |
| GO_BP_m1GO:009052actin filame2/2606  | 10/23843  | 0.300055 | 0.625459 | 0.594743 | Bcar1/Gsn   |
| GO_BP_m1GO:00970E vascular sn2/2606  | 10/23843  | 0.300055 | 0.625459 | 0.594743 | Adm/Smac    |
| GO_BP_m1GO:00971C presynaptic2/2606  | 10/23843  | 0.300055 | 0.625459 | 0.594743 | Lrp4/Nlgn3  |
| GO_BP_m1GO:00974C protein loc 2/2606 | 10/23843  | 0.300055 | 0.625459 | 0.594743 | Tulp1/Tulp  |
| GO_BP_m1GO:00989C regulation 2/2606  | 10/23843  | 0.300055 | 0.625459 | 0.594743 | Fmr1/lfng   |
| GO_BP_m1GO:19004E positive re2/2606  | 10/23843  | 0.300055 | 0.625459 | 0.594743 | Cfl1/Nlgn3  |
| GO_BP_m1GO:19013C regulation 2/2606  | 10/23843  | 0.300055 | 0.625459 | 0.594743 | Asph/Stim2  |
| GO_BP_m1GO:19013E positive re2/2606  | 10/23843  | 0.300055 | 0.625459 | 0.594743 | Cacnb2/S1   |
| GO_BP_m1GO:19037E regulation 2/2606  | 10/23843  | 0.300055 | 0.625459 | 0.594743 | Arl6ip5/Os  |
| GO_BP_m1GO:200004negative re2/2606   | 10/23843  | 0.300055 | 0.625459 | 0.594743 | Fbxo18/Pai  |
| GO_BP_m1GO:200084regulation 2/2606   | 10/23843  | 0.300055 | 0.625459 | 0.594743 | Galr1/Tac1  |
| GO_BP_m1GO:00512E positive re46/2606 | 388/23843 | 0.300651 | 0.626553 | 0.595784 | Adam8/Ad    |
| GO_BP_m1GO:000647protein de28/2606   | 230/23843 | 0.300097 | 0.627068 | 0.596274 | 2810408A1   |
| GO_BP_m1GO:00516C protein ma37/2606  | 309/23843 | 0.302316 | 0.629724 | 0.598799 | Aph1a/Aph   |
| GO_BP_m1GO:000704lysosomal t12/2606  | 92/23843  | 0.302739 | 0.630301 | 0.599348 | Ankfy1/Cac  |
| GO_BP_m1GO:00518C membrane 12/2606   | 92/23843  | 0.302739 | 0.630301 | 0.599348 | Alox12/Bo   |
| GO_BP_m1GO:000191positive re7/2606   | 50/23843  | 0.303167 | 0.630301 | 0.599348 | Arg1/Cadn   |
| GO_BP_m1GO:00064E 'de novo' p7/2606  | 50/23843  | 0.303167 | 0.630301 | 0.599348 | Cct3/Ero1l  |
| GO_BP_m1GO:001051regulation 7/2606   | 50/23843  | 0.303167 | 0.630301 | 0.599348 | Abl2/Adcy   |



|                                      |           |          |          |          |              |
|--------------------------------------|-----------|----------|----------|----------|--------------|
| GO_BP_m1GO:003513hindlimb r7/2606    | 50/23843  | 0.303167 | 0.630301 | 0.599348 | Alx3/Hoxd:   |
| GO_BP_m1GO:005189regulation 7/2606   | 50/23843  | 0.303167 | 0.630301 | 0.599348 | Bcas3/Cfl1,  |
| GO_BP_m1GO:00901Cregulation 7/2606   | 50/23843  | 0.303167 | 0.630301 | 0.599348 | Bcas3/Cfl1,  |
| GO_BP_m1GO:190406positive re17/2606  | 135/23843 | 0.305112 | 0.634195 | 0.603051 | Akap6/Asp    |
| GO_BP_m1GO:00032Ccardiac cha23/2606  | 187/23843 | 0.305765 | 0.635401 | 0.604198 | Adamts1/C    |
| GO_BP_m1GO:190336regulation 27/2606  | 222/23843 | 0.307062 | 0.637858 | 0.606534 | Anxa2/Arih   |
| GO_BP_m1GO:006004cardiac mu15/2606   | 118/23843 | 0.307336 | 0.637858 | 0.606534 | Adora1/Ak    |
| GO_BP_m1GO:190303negative re15/2606  | 118/23843 | 0.307336 | 0.637858 | 0.606534 | Adam8/Arç    |
| GO_BP_m1GO:000617cAMP bios9/2606     | 67/23843  | 0.308105 | 0.637858 | 0.606534 | Adcy4/Adr.   |
| GO_BP_m1GO:001063negative re9/2606   | 67/23843  | 0.308105 | 0.637858 | 0.606534 | Adamts9/S    |
| GO_BP_m1GO:190589regulation 9/2606   | 67/23843  | 0.308105 | 0.637858 | 0.606534 | Bcap31/Bo    |
| GO_BP_m1GO:000026mitochond 6/2606    | 42/23843  | 0.308109 | 0.637858 | 0.606534 | Bnip3/Dcn,   |
| GO_BP_m1GO:000695acute-pha6/2606     | 42/23843  | 0.308109 | 0.637858 | 0.606534 | Ednrb/Il1rr  |
| GO_BP_m1GO:00182Cpeptidyl-p16/2606   | 42/23843  | 0.308109 | 0.637858 | 0.606534 | Egln3/Fkbp   |
| GO_BP_m1GO:003157spindle che6/2606   | 42/23843  | 0.308109 | 0.637858 | 0.606534 | Klhl22/Mac   |
| GO_BP_m1GO:003419cellular res16/2606 | 42/23843  | 0.308109 | 0.637858 | 0.606534 | Atf3/Cdkn1   |
| GO_BP_m1GO:00425Cserine pho6/2606    | 42/23843  | 0.308109 | 0.637858 | 0.606534 | Cdk5/Gm1     |
| GO_BP_m1GO:004361keratinocyt6/2606   | 42/23843  | 0.308109 | 0.637858 | 0.606534 | Slurp2/Ctsl  |
| GO_BP_m1GO:004363RNA polya6/2606     | 42/23843  | 0.308109 | 0.637858 | 0.606534 | Cpeb3/Cps    |
| GO_BP_m1GO:005091positive ch6/2606   | 42/23843  | 0.308109 | 0.637858 | 0.606534 | Fgf7/Fpr2/I  |
| GO_BP_m1GO:009031regulation 6/2606   | 42/23843  | 0.308109 | 0.637858 | 0.606534 | BC004004/    |
| GO_BP_m1GO:00198Eantigen prc13/2606  | 101/23843 | 0.308921 | 0.639184 | 0.607795 | Calr/Gm11    |
| GO_BP_m1GO:200037positive re13/2606  | 101/23843 | 0.308921 | 0.639184 | 0.607795 | Cd36/Cdkr    |
| GO_BP_m1GO:004639ribose pho32/2606   | 266/23843 | 0.308968 | 0.639184 | 0.607795 | Adcy4/Adr.   |
| GO_BP_m1GO:003017negative re18/2606  | 144/23843 | 0.309115 | 0.639187 | 0.607797 | Cav1/Cdh1    |
| GO_BP_m1GO:00604Ccalcium ior18/2606  | 144/23843 | 0.309115 | 0.639187 | 0.607797 | Adcyap1r1.   |
| GO_BP_m1GO:00482Eregulation 11/2606  | 84/23843  | 0.309446 | 0.63957  | 0.608161 | Anxa2/Cd6    |
| GO_BP_m1GO:190352positive re11/2606  | 84/23843  | 0.309446 | 0.63957  | 0.608161 | Adm/Adra:    |
| GO_BP_m1GO:003134positive re51/2606  | 434/23843 | 0.31179  | 0.64013  | 0.608694 | Abl2/Ache,   |
| GO_BP_m1GO:004633positive re16/2606  | 127/23843 | 0.311929 | 0.64013  | 0.608694 | Ctgf/Gab1/   |
| GO_BP_m1GO:003139regulation 22/2606  | 179/23843 | 0.312278 | 0.64013  | 0.608694 | 5730559C1    |
| GO_BP_m1GO:000267positive re5/2606   | 34/23843  | 0.312339 | 0.64013  | 0.608694 | Adam8/Ao     |
| GO_BP_m1GO:00032Ccardiac atria5/2606 | 34/23843  | 0.312339 | 0.64013  | 0.608694 | Cfc1/Dll4/I  |
| GO_BP_m1GO:003026chromosor5/2606     | 34/23843  | 0.312339 | 0.64013  | 0.608694 | Cdk1/Hils1   |
| GO_BP_m1GO:003273positive re5/2606   | 34/23843  | 0.312339 | 0.64013  | 0.608694 | 5730559C1    |
| GO_BP_m1GO:003314negative re5/2606   | 34/23843  | 0.312339 | 0.64013  | 0.608694 | Arntl/Calr/I |
| GO_BP_m1GO:003511embryonic 5/2606    | 34/23843  | 0.312339 | 0.64013  | 0.608694 | Alx3/Meco    |
| GO_BP_m1GO:004274circadian sl5/2606  | 34/23843  | 0.312339 | 0.64013  | 0.608694 | Adora1/Dro   |
| GO_BP_m1GO:00702Eaxonemal c5/2606    | 34/23843  | 0.312339 | 0.64013  | 0.608694 | Ccdc63/Dn    |
| GO_BP_m1GO:007182plasma lipc5/2606   | 34/23843  | 0.312339 | 0.64013  | 0.608694 | Dgat1/Mttq   |
| GO_BP_m1GO:000152pseudouric 3/2606   | 18/23843  | 0.313643 | 0.64013  | 0.608694 | Nop10/Rpu    |
| GO_BP_m1GO:00019Epositive re3/2606   | 18/23843  | 0.313643 | 0.64013  | 0.608694 | Snca/Stx1b   |
| GO_BP_m1GO:000209tRNA wobk 3/2606    | 18/23843  | 0.313643 | 0.64013  | 0.608694 | 6430573F1    |
| GO_BP_m1GO:000309glomerular 3/2606   | 18/23843  | 0.313643 | 0.64013  | 0.608694 | Adora1/Ut:   |
| GO_BP_m1GO:00059Eglycogen c3/2606    | 18/23843  | 0.313643 | 0.64013  | 0.608694 | Ppp1r3d/P:   |
| GO_BP_m1GO:000649N-glycan c3/2606    | 18/23843  | 0.313643 | 0.64013  | 0.608694 | Fut8/Man1    |
| GO_BP_m1GO:000659polyamine 3/2606    | 18/23843  | 0.313643 | 0.64013  | 0.608694 | Agmat/Oa:    |
| GO_BP_m1GO:00066Eglycosphin3/2606    | 18/23843  | 0.313643 | 0.64013  | 0.608694 | B4galt3/Stf  |

|                                       |          |          |         |          |              |
|---------------------------------------|----------|----------|---------|----------|--------------|
| GO_BP_m1GO:000925glucan cat3/2606     | 18/23843 | 0.313643 | 0.64013 | 0.608694 | Ppp1r3d/Pp   |
| GO_BP_m1GO:00093C amine bios3/2606    | 18/23843 | 0.313643 | 0.64013 | 0.608694 | Agmat/Hdc    |
| GO_BP_m1GO:001086regulation 3/2606    | 18/23843 | 0.313643 | 0.64013 | 0.608694 | Hdac1/Hdc    |
| GO_BP_m1GO:00108Eregulation 3/2606    | 18/23843 | 0.313643 | 0.64013 | 0.608694 | Dhrs7c/Fkl   |
| GO_BP_m1GO:002002hemoglobi3/2606      | 18/23843 | 0.313643 | 0.64013 | 0.608694 | Eif2ak1/Prr  |
| GO_BP_m1GO:002151ventral spir3/2606   | 18/23843 | 0.313643 | 0.64013 | 0.608694 | Dbx1/Dll4/   |
| GO_BP_m1GO:00217Epreganglio 3/2606    | 18/23843 | 0.313643 | 0.64013 | 0.608694 | Hoxb1/Sen    |
| GO_BP_m1GO:00308E negative re3/2606   | 18/23843 | 0.313643 | 0.64013 | 0.608694 | Ctla4/Il10/I |
| GO_BP_m1GO:003166regulation 3/2606    | 18/23843 | 0.313643 | 0.64013 | 0.608694 | Cactin/Prkc  |
| GO_BP_m1GO:003219transpositic3/2606   | 18/23843 | 0.313643 | 0.64013 | 0.608694 | Btbd18/Dd    |
| GO_BP_m1GO:003413toll-like rec3/2606  | 18/23843 | 0.313643 | 0.64013 | 0.608694 | Cav1/Ptpn2   |
| GO_BP_m1GO:00345C protein loc 3/2606  | 18/23843 | 0.313643 | 0.64013 | 0.608694 | Cdk1/Mtbp    |
| GO_BP_m1GO:00355E purinergic 3/2606   | 18/23843 | 0.313643 | 0.64013 | 0.608694 | Acpp/Ador    |
| GO_BP_m1GO:00361E outer dyne 3/2606   | 18/23843 | 0.313643 | 0.64013 | 0.608694 | Ccdc63/Dn    |
| GO_BP_m1GO:00361E inner dynei3/2606   | 18/23843 | 0.313643 | 0.64013 | 0.608694 | Dnaaf1/Dn    |
| GO_BP_m1GO:00424C cellular bio 3/2606 | 18/23843 | 0.313643 | 0.64013 | 0.608694 | Agmat/Hdc    |
| GO_BP_m1GO:004243melanin bic3/2606    | 18/23843 | 0.313643 | 0.64013 | 0.608694 | Dct/Ddt/Ty   |
| GO_BP_m1GO:004257retinol met3/2606    | 18/23843 | 0.313643 | 0.64013 | 0.608694 | Adh1/Retsa   |
| GO_BP_m1GO:004337negative re3/2606    | 18/23843 | 0.313643 | 0.64013 | 0.608694 | Jak3/Smad    |
| GO_BP_m1GO:00435E regulation 3/2606   | 18/23843 | 0.313643 | 0.64013 | 0.608694 | Eif2ak1/Eif2 |
| GO_BP_m1GO:004562negative re3/2606    | 18/23843 | 0.313643 | 0.64013 | 0.608694 | Jak3/Smad    |
| GO_BP_m1GO:004632positive re3/2606    | 18/23843 | 0.313643 | 0.64013 | 0.608694 | Dgat1/Plin1  |
| GO_BP_m1GO:004647glycerophc3/2606     | 18/23843 | 0.313643 | 0.64013 | 0.608694 | Enpp2/Prd    |
| GO_BP_m1GO:004871negative re3/2606    | 18/23843 | 0.313643 | 0.64013 | 0.608694 | Mbd1/Nf1     |
| GO_BP_m1GO:005091detection c3/2606    | 18/23843 | 0.313643 | 0.64013 | 0.608694 | Myc/Slc12a   |
| GO_BP_m1GO:00509E detection c3/2606   | 18/23843 | 0.313643 | 0.64013 | 0.608694 | Adora1/An    |
| GO_BP_m1GO:00509E detection c3/2606   | 18/23843 | 0.313643 | 0.64013 | 0.608694 | Adora1/An    |
| GO_BP_m1GO:00718C regulation 3/2606   | 18/23843 | 0.313643 | 0.64013 | 0.608694 | Fscn1/Gsn    |
| GO_BP_m1GO:009881neurotrans 3/2606    | 18/23843 | 0.313643 | 0.64013 | 0.608694 | Gdnf/Park2   |
| GO_BP_m1GO:190342regulation 3/2606    | 18/23843 | 0.313643 | 0.64013 | 0.608694 | Dnm3/Stx1    |
| GO_BP_m1GO:19043E cellular res3/2606  | 18/23843 | 0.313643 | 0.64013 | 0.608694 | Camk2a/Ca    |
| GO_BP_m1GO:199077response tr3/2606    | 18/23843 | 0.313643 | 0.64013 | 0.608694 | Camk2a/Ca    |
| GO_BP_m1GO:000762rhythmic b8/2606     | 59/23843 | 0.314657 | 0.64013 | 0.608694 | Adora1/Csi   |
| GO_BP_m1GO:006032face develc8/2606    | 59/23843 | 0.314657 | 0.64013 | 0.608694 | Aldh1a3/Aa   |
| GO_BP_m1GO:00020E positive re4/2606   | 26/23843 | 0.314964 | 0.64013 | 0.608694 | Dct/Dmrta1   |
| GO_BP_m1GO:00020E lens morpf4/2606    | 26/23843 | 0.314964 | 0.64013 | 0.608694 | Bcar3/Epha   |
| GO_BP_m1GO:001474negative re4/2606    | 26/23843 | 0.314964 | 0.64013 | 0.608694 | Atp2b4/Ca    |
| GO_BP_m1GO:003021hyaluronan4/2606     | 26/23843 | 0.314964 | 0.64013 | 0.608694 | Has2/Hyal2   |
| GO_BP_m1GO:003097retrograde 4/2606    | 26/23843 | 0.314964 | 0.64013 | 0.608694 | Bcap31/Hs    |
| GO_BP_m1GO:00458E positive re4/2606   | 26/23843 | 0.314964 | 0.64013 | 0.608694 | lfng/Ptprc/  |
| GO_BP_m1GO:00515E mitochond4/2606     | 26/23843 | 0.314964 | 0.64013 | 0.608694 | Bcap31/Bn    |
| GO_BP_m1GO:00519E positive re4/2606   | 26/23843 | 0.314964 | 0.64013 | 0.608694 | Abat/Avpr1   |
| GO_BP_m1GO:006091heart form4/2606     | 26/23843 | 0.314964 | 0.64013 | 0.608694 | lft88/Lemd   |
| GO_BP_m1GO:006131cell surface4/2606   | 26/23843 | 0.314964 | 0.64013 | 0.608694 | Dll4/Jag1/N  |
| GO_BP_m1GO:006143renal syste4/2606    | 26/23843 | 0.314964 | 0.64013 | 0.608694 | lfng/Osr1/f  |
| GO_BP_m1GO:006144kidney vas4/2606     | 26/23843 | 0.314964 | 0.64013 | 0.608694 | lfng/Osr1/f  |
| GO_BP_m1GO:007154cellular res4/2606   | 26/23843 | 0.314964 | 0.64013 | 0.608694 | Eif4e/Gdnf   |
| GO_BP_m1GO:00901E regulation 4/2606   | 26/23843 | 0.314964 | 0.64013 | 0.608694 | Dgkq/Ephx    |

|                                |          |           |          |          |          |             |
|--------------------------------|----------|-----------|----------|----------|----------|-------------|
| GO_BP_m1GO:00905C RNA phospho  | 4/2606   | 26/23843  | 0.314964 | 0.64013  | 0.608694 | Bms1/Elac1  |
| GO_BP_m1GO:19027E positive re  | 4/2606   | 26/23843  | 0.314964 | 0.64013  | 0.608694 | Cdc25a/Cd   |
| GO_BP_m1GO:19035I endoplasm    | 4/2606   | 26/23843  | 0.314964 | 0.64013  | 0.608694 | Bcap31/Hs   |
| GO_BP_m1GO:200017 negative re  | 4/2606   | 26/23843  | 0.314964 | 0.64013  | 0.608694 | Btg2/Cend   |
| GO_BP_m1GO:00027E positive re  | 36/2606  | 302/23843 | 0.315295 | 0.640655 | 0.609193 | Abat/Abi2/  |
| GO_BP_m1GO:00070C mitochond    | 12/2606  | 93/23843  | 0.316005 | 0.641427 | 0.609928 | Bnip3/Bok/  |
| GO_BP_m1GO:001077 negative re  | 12/2606  | 93/23843  | 0.316005 | 0.641427 | 0.609928 | Aatk/Bcar1  |
| GO_BP_m1GO:003027 negative re  | 12/2606  | 93/23843  | 0.316005 | 0.641427 | 0.609928 | Calcr/Ccr1/ |
| GO_BP_m1GO:190274 regulation   | 12/2606  | 93/23843  | 0.316005 | 0.641427 | 0.609928 | Blm/Baban   |
| GO_BP_m1GO:001657 histone me   | 17/2606  | 136/23843 | 0.31604  | 0.641427 | 0.609928 | Ash2l/Dmr   |
| GO_BP_m1GO:00017E somitogen    | 10/2606  | 76/23843  | 0.316466 | 0.641995 | 0.610468 | Abi1/Foxa2  |
| GO_BP_m1GO:00343E adherens j   | 10/2606  | 76/23843  | 0.316466 | 0.641995 | 0.610468 | Bcas3/Cfl1/ |
| GO_BP_m1GO:00450E regulated e  | 24/2606  | 197/23843 | 0.317567 | 0.64408  | 0.612451 | Abca12/An   |
| GO_BP_m1GO:000647 protein me   | 21/2606  | 171/23843 | 0.319059 | 0.646544 | 0.614793 | Ash2l/Btg2  |
| GO_BP_m1GO:000821 protein alk  | 21/2606  | 171/23843 | 0.319059 | 0.646544 | 0.614793 | Ash2l/Btg2  |
| GO_BP_m1GO:00425E response tr  | 21/2606  | 171/23843 | 0.319059 | 0.646544 | 0.614793 | Aoc1/Atf3/  |
| GO_BP_m1GO:00464E phosphatic   | 15/2606  | 119/23843 | 0.319076 | 0.646544 | 0.614793 | Bpnt1/Fpr2  |
| GO_BP_m1GO:000834 glial cell   | mi7/2606 | 51/23843  | 0.321366 | 0.649983 | 0.618064 | Arhgef7/Cc  |
| GO_BP_m1GO:00326C interferon-  | 7/2606   | 51/23843  | 0.321366 | 0.649983 | 0.618064 | Cactin/Nm   |
| GO_BP_m1GO:00326E regulation   | 7/2606   | 51/23843  | 0.321366 | 0.649983 | 0.618064 | Cd36/Ifn    |
| GO_BP_m1GO:005081 negative re  | 7/2606   | 51/23843  | 0.321366 | 0.649983 | 0.618064 | Abat/Alox1  |
| GO_BP_m1GO:00508E regulation   | 7/2606   | 51/23843  | 0.321366 | 0.649983 | 0.618064 | Btnl2/Dusp  |
| GO_BP_m1GO:00512E protein het  | 7/2606   | 51/23843  | 0.321366 | 0.649983 | 0.618064 | Anxa2/Cbr   |
| GO_BP_m1GO:00650C intracellula | 7/2606   | 51/23843  | 0.321366 | 0.649983 | 0.618064 | Bcr/Grpel1  |
| GO_BP_m1GO:200051 regulation   | 7/2606   | 51/23843  | 0.321366 | 0.649983 | 0.618064 | Ifn/Il2rg/J |
| GO_BP_m1GO:00019E regulation   | 13/2606  | 102/23843 | 0.321662 | 0.650432 | 0.618491 | Bcas3/Ccl2  |
| GO_BP_m1GO:00714E cellular res | 16/2606  | 128/23843 | 0.323299 | 0.65287  | 0.620809 | Adam8/Bni   |
| GO_BP_m1GO:20012E negative re  | 16/2606  | 128/23843 | 0.323299 | 0.65287  | 0.620809 | Apobec1/F   |
| GO_BP_m1GO:00023E cytokine pr  | 11/2606  | 85/23843  | 0.323462 | 0.65287  | 0.620809 | 5730559C1   |
| GO_BP_m1GO:00027C positive re  | 11/2606  | 85/23843  | 0.323462 | 0.65287  | 0.620809 | Cd36/Gprc   |
| GO_BP_m1GO:000721 neuropepti   | 11/2606  | 85/23843  | 0.323462 | 0.65287  | 0.620809 | Cartpt/Cysl |
| GO_BP_m1GO:004277 signal trans | 11/2606  | 85/23843  | 0.323462 | 0.65287  | 0.620809 | Ankrd1/Atr  |
| GO_BP_m1GO:00435C regulation   | 11/2606  | 85/23843  | 0.323462 | 0.65287  | 0.620809 | Adk/Akap6   |
| GO_BP_m1GO:00456E regulation   | 11/2606  | 85/23843  | 0.323462 | 0.65287  | 0.620809 | Drd3/Enpp   |
| GO_BP_m1GO:00718C cellular pot | 23/2606  | 189/23843 | 0.324371 | 0.654404 | 0.622268 | Akap6/Atp   |
| GO_BP_m1GO:00718C potassium    | 23/2606  | 189/23843 | 0.324371 | 0.654404 | 0.622268 | Akap6/Atp   |
| GO_BP_m1GO:00512E protein pol  | 32/2606  | 268/23843 | 0.324587 | 0.65469  | 0.622539 | Ankrd53/C   |
| GO_BP_m1GO:19037C positive re  | 24/2606  | 198/23843 | 0.32672  | 0.65884  | 0.626486 | Adam8/Ca    |
| GO_BP_m1GO:000641 regulation   | 47/2606  | 401/23843 | 0.327215 | 0.659687 | 0.62729  | Btg2/Calr/C |
| GO_BP_m1GO:00032E regulation   | 6/2606   | 43/23843  | 0.328148 | 0.660658 | 0.628214 | Alox12/Bo   |
| GO_BP_m1GO:000604 amino sug    | 6/2606   | 43/23843  | 0.328148 | 0.660658 | 0.628214 | Chil5/Csga  |
| GO_BP_m1GO:00102E NADH deh     | 6/2606   | 43/23843  | 0.328148 | 0.660658 | 0.628214 | Aifm1/Ndu   |
| GO_BP_m1GO:001802 peptidyl-ly  | 6/2606   | 43/23843  | 0.328148 | 0.660658 | 0.628214 | Dmrtc2/Ee   |
| GO_BP_m1GO:00301E proteoglyc   | 6/2606   | 43/23843  | 0.328148 | 0.660658 | 0.628214 | Chst13/Csq  |
| GO_BP_m1GO:00329E mitochond    | 6/2606   | 43/23843  | 0.328148 | 0.660658 | 0.628214 | Aifm1/Ndu   |
| GO_BP_m1GO:003241 positive re  | 12/2606  | 94/23843  | 0.329407 | 0.662889 | 0.630336 | Abcb1a/Ak   |
| GO_BP_m1GO:00456E negative re  | 12/2606  | 94/23843  | 0.329407 | 0.662889 | 0.630336 | Cartpt/Cib  |
| GO_BP_m1GO:000911 ribonucleo   | 10/2606  | 77/23843  | 0.331343 | 0.663168 | 0.630601 | Acpp/Adk/   |

|          |           |               |          |           |          |          |          |             |
|----------|-----------|---------------|----------|-----------|----------|----------|----------|-------------|
| GO_BP_m1 | GO:00331C | mitochond     | 10/2606  | 77/23843  | 0.331343 | 0.663168 | 0.630601 | Aifm1/Ndu   |
| GO_BP_m1 | GO:006164 | cytoskeletc   | 10/2606  | 77/23843  | 0.331343 | 0.663168 | 0.630601 | Ankrd53/C   |
| GO_BP_m1 | GO:00027C | regulation    | 8/2606   | 60/23843  | 0.331577 | 0.663168 | 0.630601 | Arg1/Clec4  |
| GO_BP_m1 | GO:00336C | cellular pol  | 8/2606   | 60/23843  | 0.331577 | 0.663168 | 0.630601 | B3gnt3/B3g  |
| GO_BP_m1 | GO:007147 | cellular res  | 8/2606   | 60/23843  | 0.331577 | 0.663168 | 0.630601 | Atr/Blm/Cc  |
| GO_BP_m1 | GO:190581 | regulation    | 8/2606   | 60/23843  | 0.331577 | 0.663168 | 0.630601 | Cdc23/Klhl  |
| GO_BP_m1 | GO:20007E | regulation    | 8/2606   | 60/23843  | 0.331577 | 0.663168 | 0.630601 | Fln/Hdac1   |
| GO_BP_m1 | GO:004851 | rhythmic p    | 32/2606  | 269/23843 | 0.332485 | 0.663168 | 0.630601 | Adamts1/A   |
| GO_BP_m1 | GO:005082 | protein sta   | 19/2606  | 155/23843 | 0.333528 | 0.663168 | 0.630601 | Atp1b2/Ca   |
| GO_BP_m1 | GO:003241 | positive re   | 13/2606  | 103/23843 | 0.334524 | 0.663168 | 0.630601 | Abcb1a/Ak   |
| GO_BP_m1 | GO:004867 | axon exten    | 16/2606  | 129/23843 | 0.334772 | 0.663168 | 0.630601 | Aatk/Cdk5,  |
| GO_BP_m1 | GO:000727 | neuromusc     | 5/2606   | 35/23843  | 0.334809 | 0.663168 | 0.630601 | Chrm1/Chr   |
| GO_BP_m1 | GO:00310C | hair follicle | 5/2606   | 35/23843  | 0.334809 | 0.663168 | 0.630601 | Ctsl/Fgf7/F |
| GO_BP_m1 | GO:003314 | positive re   | 5/2606   | 35/23843  | 0.334809 | 0.663168 | 0.630601 | Gm13271/I   |
| GO_BP_m1 | GO:00359C | aorta mor     | 5/2606   | 35/23843  | 0.334809 | 0.663168 | 0.630601 | Adamts9/C   |
| GO_BP_m1 | GO:004647 | phosphatic    | 5/2606   | 35/23843  | 0.334809 | 0.663168 | 0.630601 | Abhd1/En    |
| GO_BP_m1 | GO:00466C | alpha-beta    | 5/2606   | 35/23843  | 0.334809 | 0.663168 | 0.630601 | Blm/Cd80/   |
| GO_BP_m1 | GO:004814 | negative re   | 5/2606   | 35/23843  | 0.334809 | 0.663168 | 0.630601 | Dach1/Ifng  |
| GO_BP_m1 | GO:19013E | positive re   | 5/2606   | 35/23843  | 0.334809 | 0.663168 | 0.630601 | Akap6/Atp   |
| GO_BP_m1 | GO:00512C | protein hor   | 41/2606  | 349/23843 | 0.335384 | 0.663168 | 0.630601 | Acpp/Aldh   |
| GO_BP_m1 | GO:000611 | energy res    | 11/2606  | 86/23843  | 0.337612 | 0.663168 | 0.630601 | Esrrb/Gys1  |
| GO_BP_m1 | GO:00512E | protein hor   | 11/2606  | 86/23843  | 0.337612 | 0.663168 | 0.630601 | Acpp/Aldh   |
| GO_BP_m1 | GO:00513C | chromosor     | 11/2606  | 86/23843  | 0.337612 | 0.663168 | 0.630601 | Cdc23/Klhl  |
| GO_BP_m1 | GO:000027 | polysaccha    | 9/2606   | 69/23843  | 0.339708 | 0.663168 | 0.630601 | B3gnt3/B3g  |
| GO_BP_m1 | GO:00455C | negative re   | 7/2606   | 52/23843  | 0.339738 | 0.663168 | 0.630601 | Arntl/Asxl1 |
| GO_BP_m1 | GO:00718C | protein tra   | 7/2606   | 52/23843  | 0.339738 | 0.663168 | 0.630601 | Bcr/Grpel1. |
| GO_BP_m1 | GO:007252 | pyrimidine    | 7/2606   | 52/23843  | 0.339738 | 0.663168 | 0.630601 | Acpp/Dpypc  |
| GO_BP_m1 | GO:007267 | T cell migr   | 7/2606   | 52/23843  | 0.339738 | 0.663168 | 0.630601 | Adam8/Ccl   |
| GO_BP_m1 | GO:000191 | regulation    | 4/2606   | 27/23843  | 0.340875 | 0.663168 | 0.630601 | Fam49b/Il1  |
| GO_BP_m1 | GO:00033C | metaneph      | 4/2606   | 27/23843  | 0.340875 | 0.663168 | 0.630601 | Gdnf/Lgr4/  |
| GO_BP_m1 | GO:00107C | regulation    | 4/2606   | 27/23843  | 0.340875 | 0.663168 | 0.630601 | Akap6/C33   |
| GO_BP_m1 | GO:00215C | cell differ   | er4/2606 | 27/23843  | 0.340875 | 0.663168 | 0.630601 | Cend1/Fox   |
| GO_BP_m1 | GO:00331C | negative re   | 4/2606   | 27/23843  | 0.340875 | 0.663168 | 0.630601 | Cav1/Nck2   |
| GO_BP_m1 | GO:004411 | growth inv    | 4/2606   | 27/23843  | 0.340875 | 0.663168 | 0.630601 | Cd36/Ifng/  |
| GO_BP_m1 | GO:004411 | growth of     | 4/2606   | 27/23843  | 0.340875 | 0.663168 | 0.630601 | Cd36/Ifng/  |
| GO_BP_m1 | GO:00701C | protein loc   | 4/2606   | 27/23843  | 0.340875 | 0.663168 | 0.630601 | Atr/H2afy/I |
| GO_BP_m1 | GO:009031 | positive re   | 4/2606   | 27/23843  | 0.340875 | 0.663168 | 0.630601 | BC004004/   |
| GO_BP_m1 | GO:009734 | mitochond     | 4/2606   | 27/23843  | 0.340875 | 0.663168 | 0.630601 | Bnip3/Bok/  |
| GO_BP_m1 | GO:20003C | regulation    | 4/2606   | 27/23843  | 0.340875 | 0.663168 | 0.630601 | Fmr1/Rab5   |
| GO_BP_m1 | GO:007177 | response tr   | 22/2606  | 182/23843 | 0.341158 | 0.663168 | 0.630601 | Bmp3/Cav.   |
| GO_BP_m1 | GO:007177 | cellular res  | 22/2606  | 182/23843 | 0.341158 | 0.663168 | 0.630601 | Bmp3/Cav.   |
| GO_BP_m1 | GO:00000E | urea cycle    | 2/2606   | 11/23843  | 0.342216 | 0.663168 | 0.630601 | Arg1/Otc    |
| GO_BP_m1 | GO:00004C | small nucle   | 2/2606   | 11/23843  | 0.342216 | 0.663168 | 0.630601 | Gm3086/Ti   |
| GO_BP_m1 | GO:00017E | natural kill  | 2/2606   | 11/23843  | 0.342216 | 0.663168 | 0.630601 | Il12b/Ptpn2 |
| GO_BP_m1 | GO:000257 | positive re   | 2/2606   | 11/23843  | 0.342216 | 0.663168 | 0.630601 | Nod1/Pyca   |
| GO_BP_m1 | GO:00061C | succinate n   | 2/2606   | 11/23843  | 0.342216 | 0.663168 | 0.630601 | Sdhaf3/Sdf  |
| GO_BP_m1 | GO:000627 | lagging str   | 2/2606   | 11/23843  | 0.342216 | 0.663168 | 0.630601 | Fen1/Lig3   |
| GO_BP_m1 | GO:000652 | arginine ca   | 2/2606   | 11/23843  | 0.342216 | 0.663168 | 0.630601 | Arg1/Atp2I  |

|          |           |              |        |          |          |          |          |              |
|----------|-----------|--------------|--------|----------|----------|----------|----------|--------------|
| GO_BP_m1 | GO:000665 | phosphatic   | 2/2606 | 11/23843 | 0.342216 | 0.663168 | 0.630601 | Agpat2/Dg    |
| GO_BP_m1 | GO:000695 | compleme     | 2/2606 | 11/23843 | 0.342216 | 0.663168 | 0.630601 | Cfd/Susd4    |
| GO_BP_m1 | GO:000912 | nucleoside   | 2/2606 | 11/23843 | 0.342216 | 0.663168 | 0.630601 | Dnph1/Nt5    |
| GO_BP_m1 | GO:000926 | 2'-deoxyri   | 2/2606 | 11/23843 | 0.342216 | 0.663168 | 0.630601 | Adk/Shmt1    |
| GO_BP_m1 | GO:000935 | folic acid-c | 2/2606 | 11/23843 | 0.342216 | 0.663168 | 0.630601 | Gch1/Mthf    |
| GO_BP_m1 | GO:001073 | positive re  | 2/2606 | 11/23843 | 0.342216 | 0.663168 | 0.630601 | C330021F2    |
| GO_BP_m1 | GO:001580 | arginine tr  | 2/2606 | 11/23843 | 0.342216 | 0.663168 | 0.630601 | Arg1/AU01    |
| GO_BP_m1 | GO:001708 | response tr  | 2/2606 | 11/23843 | 0.342216 | 0.663168 | 0.630601 | Mapk13/Zc    |
| GO_BP_m1 | GO:002185 | cerebral co  | 2/2606 | 11/23843 | 0.342216 | 0.663168 | 0.630601 | Arx/Rac3     |
| GO_BP_m1 | GO:003095 | astral micr  | 2/2606 | 11/23843 | 0.342216 | 0.663168 | 0.630601 | Ezr/Tacc2    |
| GO_BP_m1 | GO:003107 | post-embr    | 2/2606 | 11/23843 | 0.342216 | 0.663168 | 0.630601 | Krtap21-1/   |
| GO_BP_m1 | GO:003150 | heterochro   | 2/2606 | 11/23843 | 0.342216 | 0.663168 | 0.630601 | Bahd1/Tpr    |
| GO_BP_m1 | GO:003332 | Leydig cell  | 2/2606 | 11/23843 | 0.342216 | 0.663168 | 0.630601 | Map7/Pdgi    |
| GO_BP_m1 | GO:003437 | high-densi   | 2/2606 | 11/23843 | 0.342216 | 0.663168 | 0.630601 | Pltp/Scarb1  |
| GO_BP_m1 | GO:003477 | response tr  | 2/2606 | 11/23843 | 0.342216 | 0.663168 | 0.630601 | Aoc1/Drd3    |
| GO_BP_m1 | GO:003533 | fatty-acyl-  | 2/2606 | 11/23843 | 0.342216 | 0.663168 | 0.630601 | Dgat1/Hsd    |
| GO_BP_m1 | GO:003537 | sterol impc  | 2/2606 | 11/23843 | 0.342216 | 0.663168 | 0.630601 | Cd36/Scarb   |
| GO_BP_m1 | GO:003593 | glucocortic  | 2/2606 | 11/23843 | 0.342216 | 0.663168 | 0.630601 | Galr1/Tac1   |
| GO_BP_m1 | GO:003605 | germ cell    | 2/2606 | 11/23843 | 0.342216 | 0.663168 | 0.630601 | Cib1/Dmrt1   |
| GO_BP_m1 | GO:003806 | collagen-a   | 2/2606 | 11/23843 | 0.342216 | 0.663168 | 0.630601 | Col4a2/Ubi   |
| GO_BP_m1 | GO:003816 | angiotensin  | 2/2606 | 11/23843 | 0.342216 | 0.663168 | 0.630601 | Camk2a/Ca    |
| GO_BP_m1 | GO:004356 | positive re  | 2/2606 | 11/23843 | 0.342216 | 0.663168 | 0.630601 | Ift88/Igfbp3 |
| GO_BP_m1 | GO:004365 | mitochond    | 2/2606 | 11/23843 | 0.342216 | 0.663168 | 0.630601 | Bnip3/Park   |
| GO_BP_m1 | GO:004514 | meiotic sist | 2/2606 | 11/23843 | 0.342216 | 0.663168 | 0.630601 | Ppp2r1a/Sy   |
| GO_BP_m1 | GO:004587 | positive re  | 2/2606 | 11/23843 | 0.342216 | 0.663168 | 0.630601 | Fen1/H2afy   |
| GO_BP_m1 | GO:004592 | regulation   | 2/2606 | 11/23843 | 0.342216 | 0.663168 | 0.630601 | Avpr1a/Drc   |
| GO_BP_m1 | GO:004600 | negative re  | 2/2606 | 11/23843 | 0.342216 | 0.663168 | 0.630601 | Arg1/Lrrc3   |
| GO_BP_m1 | GO:004604 | IMP metab    | 2/2606 | 11/23843 | 0.342216 | 0.663168 | 0.630601 | Adss/Nt5c2   |
| GO_BP_m1 | GO:004638 | deoxyribos   | 2/2606 | 11/23843 | 0.342216 | 0.663168 | 0.630601 | Adk/Shmt1    |
| GO_BP_m1 | GO:004831 | intracellula | 2/2606 | 11/23843 | 0.342216 | 0.663168 | 0.630601 | Kat2a/Ogt    |
| GO_BP_m1 | GO:005113 | NK T cell    | 2/2606 | 11/23843 | 0.342216 | 0.663168 | 0.630601 | Hsph1/Il12   |
| GO_BP_m1 | GO:005115 | negative re  | 2/2606 | 11/23843 | 0.342216 | 0.663168 | 0.630601 | Med28/Rbj    |
| GO_BP_m1 | GO:005154 | regulation   | 2/2606 | 11/23843 | 0.342216 | 0.663168 | 0.630601 | Fgf7/Has2    |
| GO_BP_m1 | GO:005163 | actin filam  | 2/2606 | 11/23843 | 0.342216 | 0.663168 | 0.630601 | Pls1/Pls3    |
| GO_BP_m1 | GO:005190 | positive re  | 2/2606 | 11/23843 | 0.342216 | 0.663168 | 0.630601 | Alox12/Dcr   |
| GO_BP_m1 | GO:006007 | micturition  | 2/2606 | 11/23843 | 0.342216 | 0.663168 | 0.630601 | Adra1d/Hti   |
| GO_BP_m1 | GO:006015 | regulation   | 2/2606 | 11/23843 | 0.342216 | 0.663168 | 0.630601 | Drd3/Rgs8    |
| GO_BP_m1 | GO:006021 | regulation   | 2/2606 | 11/23843 | 0.342216 | 0.663168 | 0.630601 | Btg2/Cpeb    |
| GO_BP_m1 | GO:006021 | positive re  | 2/2606 | 11/23843 | 0.342216 | 0.663168 | 0.630601 | Btg2/Cpeb    |
| GO_BP_m1 | GO:007047 | regulation   | 2/2606 | 11/23843 | 0.342216 | 0.663168 | 0.630601 | Abat/Tacr2   |
| GO_BP_m1 | GO:007049 | thrombin-    | 2/2606 | 11/23843 | 0.342216 | 0.663168 | 0.630601 | Dgkq/Snca    |
| GO_BP_m1 | GO:007050 | cholesterol  | 2/2606 | 11/23843 | 0.342216 | 0.663168 | 0.630601 | Cd36/Scarb   |
| GO_BP_m1 | GO:007058 | cell-cell ad | 2/2606 | 11/23843 | 0.342216 | 0.663168 | 0.630601 | Il10/Il1rn   |
| GO_BP_m1 | GO:007131 | cellular res | 2/2606 | 11/23843 | 0.342216 | 0.663168 | 0.630601 | Hsp90b1/S    |
| GO_BP_m1 | GO:007160 | otic vesicle | 2/2606 | 11/23843 | 0.342216 | 0.663168 | 0.630601 | Stox1/Tbx1   |
| GO_BP_m1 | GO:007173 | cellular res | 2/2606 | 11/23843 | 0.342216 | 0.663168 | 0.630601 | Bcar1/Kcnc   |
| GO_BP_m1 | GO:007212 | regulation   | 2/2606 | 11/23843 | 0.342216 | 0.663168 | 0.630601 | Irfng/Wt1    |
| GO_BP_m1 | GO:007217 | nephric du   | 2/2606 | 11/23843 | 0.342216 | 0.663168 | 0.630601 | Epha7/Osr1   |

|                               |          |           |          |          |          |             |
|-------------------------------|----------|-----------|----------|----------|----------|-------------|
| GO_BP_m1GO:00725εcaveolin-r   | 2/2606   | 11/23843  | 0.342216 | 0.663168 | 0.630601 | Cav1/Cav3   |
| GO_BP_m1GO:00903εnegative re  | 2/2606   | 11/23843  | 0.342216 | 0.663168 | 0.630601 | Nlgn3/Park  |
| GO_BP_m1GO:00970εsynaptic ve  | 2/2606   | 11/23843  | 0.342216 | 0.663168 | 0.630601 | Cdh2/Nlgn   |
| GO_BP_m1GO:009872asymmetric   | 2/2606   | 11/23843  | 0.342216 | 0.663168 | 0.630601 | Dock7/Fgf   |
| GO_BP_m1GO:00987εxenophagy    | 2/2606   | 11/23843  | 0.342216 | 0.663168 | 0.630601 | Nod1/Wipi   |
| GO_BP_m1GO:010607regulation   | 2/2606   | 11/23843  | 0.342216 | 0.663168 | 0.630601 | Atp2b4/O    |
| GO_BP_m1GO:19003εregulation   | 2/2606   | 11/23843  | 0.342216 | 0.663168 | 0.630601 | Cpeb3/Sup   |
| GO_BP_m1GO:19022εpositive re  | ε2/2606  | 11/23843  | 0.342216 | 0.663168 | 0.630601 | Fbxo18/Ski  |
| GO_BP_m1GO:19024εpositive re  | ε2/2606  | 11/23843  | 0.342216 | 0.663168 | 0.630601 | Esrrb/Kdm   |
| GO_BP_m1GO:190342positive re  | ε2/2606  | 11/23843  | 0.342216 | 0.663168 | 0.630601 | Dnm3/Synj   |
| GO_BP_m1GO:199044positive re  | ε2/2606  | 11/23843  | 0.342216 | 0.663168 | 0.630601 | Atf3/Creb3  |
| GO_BP_m1GO:200032regulation   | 2/2606   | 11/23843  | 0.342216 | 0.663168 | 0.630601 | Arntl/Clock |
| GO_BP_m1GO:000327cardiac sep  | 15/2606  | 121/23843 | 0.342881 | 0.663168 | 0.630601 | Cfc1/Cntrl/ |
| GO_BP_m1GO:007124cellular res | 15/2606  | 121/23843 | 0.342881 | 0.663168 | 0.630601 | Aoc1/Asph   |
| GO_BP_m1GO:00458Cpositive re  | ε19/2606 | 156/23843 | 0.344048 | 0.663168 | 0.630601 | Ankfy1/An   |
| GO_BP_m1GO:00024εantigen pr   | ε3/2606  | 19/23843  | 0.345006 | 0.663168 | 0.630601 | H2-DMb2/    |
| GO_BP_m1GO:00060εlactate met  | ε3/2606  | 19/23843  | 0.345006 | 0.663168 | 0.630601 | Haghl/Ldh   |
| GO_BP_m1GO:00061C2-oxogluta   | ε3/2606  | 19/23843  | 0.345006 | 0.663168 | 0.630601 | Got1/Idh3   |
| GO_BP_m1GO:000634methylation  | ε3/2606  | 19/23843  | 0.345006 | 0.663168 | 0.630601 | Apobec1/H   |
| GO_BP_m1GO:001062programm     | ε3/2606  | 19/23843  | 0.345006 | 0.663168 | 0.630601 | Casp6/Kitl/ |
| GO_BP_m1GO:00160εsynaptic ve  | ε3/2606  | 19/23843  | 0.345006 | 0.663168 | 0.630601 | Snap29/St   |
| GO_BP_m1GO:00354εcargo load   | ε3/2606  | 19/23843  | 0.345006 | 0.663168 | 0.630601 | Mia3/Sec2   |
| GO_BP_m1GO:004304DNA meth     | ε3/2606  | 19/23843  | 0.345006 | 0.663168 | 0.630601 | Ddx4/Fkbp   |
| GO_BP_m1GO:004424cellular pol | ε3/2606  | 19/23843  | 0.345006 | 0.663168 | 0.630601 | Ppp1r3d/P   |
| GO_BP_m1GO:004564regulation   | ε3/2606  | 19/23843  | 0.345006 | 0.663168 | 0.630601 | Casp8/Prkc  |
| GO_BP_m1GO:00468εcarbohydr    | ε3/2606  | 19/23843  | 0.345006 | 0.663168 | 0.630601 | Adk/Pfkfb1  |
| GO_BP_m1GO:00468εpositive re  | ε3/2606  | 19/23843  | 0.345006 | 0.663168 | 0.630601 | lfng/Por/P  |
| GO_BP_m1GO:005084negative re  | ε3/2606  | 19/23843  | 0.345006 | 0.663168 | 0.630601 | Atp2b4/Fkl  |
| GO_BP_m1GO:00508εneuromusc    | ε3/2606  | 19/23843  | 0.345006 | 0.663168 | 0.630601 | Gch1/Tcf1   |
| GO_BP_m1GO:00513εkinetochor   | ε3/2606  | 19/23843  | 0.345006 | 0.663168 | 0.630601 | Cenpa/Cer   |
| GO_BP_m1GO:005177positive re  | ε3/2606  | 19/23843  | 0.345006 | 0.663168 | 0.630601 | Ccl20/Fnta  |
| GO_BP_m1GO:00602εcilium mov   | ε3/2606  | 19/23843  | 0.345006 | 0.663168 | 0.630601 | Bbs2/Dnah   |
| GO_BP_m1GO:00607εectoderma    | ε3/2606  | 19/23843  | 0.345006 | 0.663168 | 0.630601 | Hdac1/Hd    |
| GO_BP_m1GO:00702Cprotein het  | ε3/2606  | 19/23843  | 0.345006 | 0.663168 | 0.630601 | Nup54/Og    |
| GO_BP_m1GO:007142rRNA-cont    | ε3/2606  | 19/23843  | 0.345006 | 0.663168 | 0.630601 | Nmd3/Rasl   |
| GO_BP_m1GO:00716εectoderma    | ε3/2606  | 19/23843  | 0.345006 | 0.663168 | 0.630601 | Hdac1/Hd    |
| GO_BP_m1GO:00902Cnegative re  | ε3/2606  | 19/23843  | 0.345006 | 0.663168 | 0.630601 | Gpx1/Higd   |
| GO_BP_m1GO:19018εnegative re  | ε3/2606  | 19/23843  | 0.345006 | 0.663168 | 0.630601 | Bcas3/ltgb  |
| GO_BP_m1GO:19023Cpositive re  | ε3/2606  | 19/23843  | 0.345006 | 0.663168 | 0.630601 | Atp1b2/Fxy  |
| GO_BP_m1GO:200001positive re  | ε3/2606  | 19/23843  | 0.345006 | 0.663168 | 0.630601 | Abca12/Nr   |
| GO_BP_m1GO:20007εnegative re  | ε3/2606  | 19/23843  | 0.345006 | 0.663168 | 0.630601 | Fbxo18/Nu   |
| GO_BP_m1GO:003267regulation   | ε16/2606 | 130/23843 | 0.346336 | 0.663168 | 0.630601 | 5730559C1   |
| GO_BP_m1GO:19033Cregulation   | ε16/2606 | 130/23843 | 0.346336 | 0.663168 | 0.630601 | Bcr/Catspe  |
| GO_BP_m1GO:004584positive re  | ε10/2606 | 78/23843  | 0.346348 | 0.663168 | 0.630601 | Akap6/Arn   |
| GO_BP_m1GO:00486εpositive re  | ε10/2606 | 78/23843  | 0.346348 | 0.663168 | 0.630601 | Akap6/Arn   |
| GO_BP_m1GO:00487Castrocyte d  | ε10/2606 | 78/23843  | 0.346348 | 0.663168 | 0.630601 | Abl2/Fpr2/  |
| GO_BP_m1GO:006007excitatory   | ε10/2606 | 78/23843  | 0.346348 | 0.663168 | 0.630601 | Adora1/Cd   |
| GO_BP_m1GO:006041cardiac sep  | ε10/2606 | 78/23843  | 0.346348 | 0.663168 | 0.630601 | Cfc1/lft88/ |

|                   |                |         |           |          |          |          |              |
|-------------------|----------------|---------|-----------|----------|----------|----------|--------------|
| GO_BP_m1GO:004863 | regulation     | 20/2606 | 165/23843 | 0.34656  | 0.663168 | 0.630601 | Akap6/Arn    |
| GO_BP_m1GO:000270 | negative re    | 6/2606  | 44/23843  | 0.348346 | 0.663168 | 0.630601 | Arg1/Clec4   |
| GO_BP_m1GO:004326 | positive re    | 6/2606  | 44/23843  | 0.348346 | 0.663168 | 0.630601 | Adora1/Ak    |
| GO_BP_m1GO:000185 | endothelial    | 8/2606  | 61/23843  | 0.348639 | 0.663168 | 0.630601 | Cldn1/Ezr/   |
| GO_BP_m1GO:001644 | somatic div    | 8/2606  | 61/23843  | 0.348639 | 0.663168 | 0.630601 | Aplf/Ifng/Il |
| GO_BP_m1GO:005077 | negative re    | 8/2606  | 61/23843  | 0.348639 | 0.663168 | 0.630601 | Aatk/Cdk5,   |
| GO_BP_m1GO:190305 | negative re    | 8/2606  | 61/23843  | 0.348639 | 0.663168 | 0.630601 | N4bp1/Og     |
| GO_BP_m1GO:005079 | regulation     | 21/2606 | 174/23843 | 0.348844 | 0.663168 | 0.630601 | Abat/Ano1    |
| GO_BP_m1GO:007137 | cellular res   | 27/2606 | 227/23843 | 0.350247 | 0.663168 | 0.630601 | Appl1/Bcar   |
| GO_BP_m1GO:003252 | response tr    | 11/2606 | 87/23843  | 0.351875 | 0.663168 | 0.630601 | Abl2/Adh1.   |
| GO_BP_m1GO:005165 | establishm     | 47/2606 | 405/23843 | 0.353322 | 0.663168 | 0.630601 | Ankrd53/Bl   |
| GO_BP_m1GO:004863 | negative re    | 9/2606  | 70/23843  | 0.355705 | 0.663168 | 0.630601 | Cav3/Ephb    |
| GO_BP_m1GO:009030 | mitotic spir   | 9/2606  | 70/23843  | 0.355705 | 0.663168 | 0.630601 | Cdc20/Chn    |
| GO_BP_m1GO:004575 | positive re    | 40/2606 | 343/23843 | 0.355802 | 0.663168 | 0.630601 | BC004004/    |
| GO_BP_m1GO:001567 | monovalen      | 53/2606 | 459/23843 | 0.356159 | 0.663168 | 0.630601 | Adora1/Ad    |
| GO_BP_m1GO:003007 | insulin secr   | 25/2606 | 210/23843 | 0.3562   | 0.663168 | 0.630601 | Abat/Ano1    |
| GO_BP_m1GO:000704 | cell-cell jur  | 12/2606 | 96/23843  | 0.356549 | 0.663168 | 0.630601 | Cav1/Cdh1    |
| GO_BP_m1GO:004577 | positive re    | 12/2606 | 96/23843  | 0.356549 | 0.663168 | 0.630601 | Clic1/Cthrc  |
| GO_BP_m1GO:009026 | positive re    | 12/2606 | 96/23843  | 0.356549 | 0.663168 | 0.630601 | Arntl/Capri  |
| GO_BP_m1GO:004352 | negative re    | 20/2606 | 166/23843 | 0.356881 | 0.663168 | 0.630601 | Adam8/Bo     |
| GO_BP_m1GO:000046 | maturation     | 5/2606  | 36/23843  | 0.357407 | 0.663168 | 0.630601 | Bms1/Kri1/   |
| GO_BP_m1GO:000156 | response tr    | 5/2606  | 36/23843  | 0.357407 | 0.663168 | 0.630601 | Arg1/Ifng/I  |
| GO_BP_m1GO:001009 | specificatio   | 5/2606  | 36/23843  | 0.357407 | 0.663168 | 0.630601 | Fgf1/Gdnf/   |
| GO_BP_m1GO:001073 | protein kin    | 5/2606  | 36/23843  | 0.357407 | 0.663168 | 0.630601 | Akap6/C33    |
| GO_BP_m1GO:003410 | positive re    | 5/2606  | 36/23843  | 0.357407 | 0.663168 | 0.630601 | Adam8/Os     |
| GO_BP_m1GO:003511 | embryonic      | 5/2606  | 36/23843  | 0.357407 | 0.663168 | 0.630601 | Alx3/Meco    |
| GO_BP_m1GO:004231 | vasodilatio    | 5/2606  | 36/23843  | 0.357407 | 0.663168 | 0.630601 | Adora1/Bb    |
| GO_BP_m1GO:004239 | cellular mo    | 5/2606  | 36/23843  | 0.357407 | 0.663168 | 0.630601 | Tmem269/     |
| GO_BP_m1GO:004826 | response tr    | 5/2606  | 36/23843  | 0.357407 | 0.663168 | 0.630601 | Ednrb/Gch    |
| GO_BP_m1GO:004871 | regulation     | 5/2606  | 36/23843  | 0.357407 | 0.663168 | 0.630601 | Mbd1/Nf1,    |
| GO_BP_m1GO:006135 | heart trabe    | 5/2606  | 36/23843  | 0.357407 | 0.663168 | 0.630601 | Adamts1/C    |
| GO_BP_m1GO:006190 | glial cell ac  | 5/2606  | 36/23843  | 0.357407 | 0.663168 | 0.630601 | Fpr2/Itgam   |
| GO_BP_m1GO:190269 | regulation     | 5/2606  | 36/23843  | 0.357407 | 0.663168 | 0.630601 | Dct/Dmrta;   |
| GO_BP_m1GO:001000 | glial cell dif | 26/2606 | 219/23843 | 0.357686 | 0.663168 | 0.630601 | Abl2/Ahna    |
| GO_BP_m1GO:006113 | morphoge       | 26/2606 | 219/23843 | 0.357686 | 0.663168 | 0.630601 | Adm/Cav3,    |
| GO_BP_m1GO:000252 | acute inflar   | 16/2606 | 131/23843 | 0.357981 | 0.663168 | 0.630601 | Adam8/Ad     |
| GO_BP_m1GO:003265 | regulation     | 7/2606  | 53/23843  | 0.358237 | 0.663168 | 0.630601 | 5730559C1    |
| GO_BP_m1GO:005099 | regulation     | 7/2606  | 53/23843  | 0.358237 | 0.663168 | 0.630601 | Adora1/An    |
| GO_BP_m1GO:005193 | synaptic tra   | 7/2606  | 53/23843  | 0.358237 | 0.663168 | 0.630601 | Adora1/Ga    |
| GO_BP_m1GO:190101 | regulation     | 7/2606  | 53/23843  | 0.358237 | 0.663168 | 0.630601 | Akap6/Atp    |
| GO_BP_m1GO:190275 | negative re    | 7/2606  | 53/23843  | 0.358237 | 0.663168 | 0.630601 | Blm/Baban    |
| GO_BP_m1GO:190339 | regulation     | 7/2606  | 53/23843  | 0.358237 | 0.663168 | 0.630601 | Bcas3/Cfl1,  |
| GO_BP_m1GO:200064 | positive re    | 7/2606  | 53/23843  | 0.358237 | 0.663168 | 0.630601 | Dct/Dmrta;   |
| GO_BP_m1GO:000206 | epithelial c   | 28/2606 | 237/23843 | 0.360333 | 0.663168 | 0.630601 | Arntl/Cdh1   |
| GO_BP_m1GO:003133 | positive re    | 28/2606 | 237/23843 | 0.360333 | 0.663168 | 0.630601 | Ankrd53/A    |
| GO_BP_m1GO:190437 | regulation     | 13/2606 | 105/23843 | 0.360551 | 0.663168 | 0.630601 | Appl1/Carr   |
| GO_BP_m1GO:200017 | regulation     | 13/2606 | 105/23843 | 0.360551 | 0.663168 | 0.630601 | Btg2/Cdh2    |
| GO_BP_m1GO:000974 | response tr    | 22/2606 | 184/23843 | 0.360761 | 0.663168 | 0.630601 | Ano1/Casp    |

|                                        |           |          |          |          |              |
|----------------------------------------|-----------|----------|----------|----------|--------------|
| GO_BP_m1GO:00032Ccardiac ver 10/2606   | 79/23843  | 0.361457 | 0.663168 | 0.630601 | Dll4/Foxc1,  |
| GO_BP_m1GO:004852positive reç 10/2606  | 79/23843  | 0.361457 | 0.663168 | 0.630601 | Cfl1/Fkbp6   |
| GO_BP_m1GO:00702Eactin-medi 10/2606    | 79/23843  | 0.361457 | 0.663168 | 0.630601 | Acta2/Akap   |
| GO_BP_m1GO:19039Cnegative re 10/2606   | 79/23843  | 0.361457 | 0.663168 | 0.630601 | Eif2ak2/Gsi  |
| GO_BP_m1GO:19040Eregulation 10/2606    | 79/23843  | 0.361457 | 0.663168 | 0.630601 | Abl2/Bok/C   |
| GO_BP_m1GO:00487Egland deve 53/2606    | 460/23843 | 0.362389 | 0.663168 | 0.630601 | Aldh1a3/Aj   |
| GO_BP_m1GO:00016Eresponse tr 23/2606   | 193/23843 | 0.362449 | 0.663168 | 0.630601 | Abat/Adar    |
| GO_BP_m1GO:00486Eregulation 18/2606    | 149/23843 | 0.363123 | 0.663168 | 0.630601 | Alox12/Cav   |
| GO_BP_m1GO:19016Eresponse tr 41/2606   | 353/23843 | 0.363611 | 0.663168 | 0.630601 | 5730559C1    |
| GO_BP_m1GO:001657protein del 14/2606   | 114/23843 | 0.364014 | 0.663168 | 0.630601 | Asxl1/Eif3f/ |
| GO_BP_m1GO:004217negative re 14/2606   | 114/23843 | 0.364014 | 0.663168 | 0.630601 | Anxa2/Il10,  |
| GO_BP_m1GO:005071positive reç 32/2606  | 273/23843 | 0.364579 | 0.663168 | 0.630601 | Abat/Abl2/   |
| GO_BP_m1GO:004521cell-cell jur 25/2606 | 211/23843 | 0.365414 | 0.663168 | 0.630601 | 5730559C1    |
| GO_BP_m1GO:000267regulation 8/2606     | 62/23843  | 0.365807 | 0.663168 | 0.630601 | Adam8/Ad     |
| GO_BP_m1GO:003134positive reç 8/2606   | 62/23843  | 0.365807 | 0.663168 | 0.630601 | Arg1/Cadn    |
| GO_BP_m1GO:004277ATP synthe 8/2606     | 62/23843  | 0.365807 | 0.663168 | 0.630601 | Cdk1/CoqE    |
| GO_BP_m1GO:000194lymph vess 4/2606     | 28/23843  | 0.36684  | 0.663168 | 0.630601 | Epha2/Foxi   |
| GO_BP_m1GO:000202response tr 4/2606    | 28/23843  | 0.36684  | 0.663168 | 0.630601 | Ppargc1a/F   |
| GO_BP_m1GO:00067Efoliac acid-c 4/2606  | 28/23843  | 0.36684  | 0.663168 | 0.630601 | Gch1/Mthf    |
| GO_BP_m1GO:00075Esex determ 4/2606     | 28/23843  | 0.36684  | 0.663168 | 0.630601 | Dmrt1/Nr5    |
| GO_BP_m1GO:00219Ecentral ner 4/2606    | 28/23843  | 0.36684  | 0.663168 | 0.630601 | Ephb1/Eph    |
| GO_BP_m1GO:00335Eregulation 4/2606     | 28/23843  | 0.36684  | 0.663168 | 0.630601 | Abca12/Alc   |
| GO_BP_m1GO:00357Eendothelial 4/2606    | 28/23843  | 0.36684  | 0.663168 | 0.630601 | Fgf1/Fgf16   |
| GO_BP_m1GO:00435Epositive reç 4/2606   | 28/23843  | 0.36684  | 0.663168 | 0.630601 | Epha8/Fpr2   |
| GO_BP_m1GO:00445Esecondary 4/2606      | 28/23843  | 0.36684  | 0.663168 | 0.630601 | Bdh2/Dct/I   |
| GO_BP_m1GO:00459Enegative re 4/2606    | 28/23843  | 0.36684  | 0.663168 | 0.630601 | Col5a1/Prk   |
| GO_BP_m1GO:00488Ehair follicle 4/2606  | 28/23843  | 0.36684  | 0.663168 | 0.630601 | Ctsl/Krtap2  |
| GO_BP_m1GO:00506Echondroitir 4/2606    | 28/23843  | 0.36684  | 0.663168 | 0.630601 | Chst13/Csc   |
| GO_BP_m1GO:005164centrosom 4/2606      | 28/23843  | 0.36684  | 0.663168 | 0.630601 | Ezr/Nubp1    |
| GO_BP_m1GO:006021hematopoi 4/2606      | 28/23843  | 0.36684  | 0.663168 | 0.630601 | Eif2ak2/Fo   |
| GO_BP_m1GO:006044branching 4/2606      | 28/23843  | 0.36684  | 0.663168 | 0.630601 | Cdh1/Fgf7,   |
| GO_BP_m1GO:00612Eretina vasc 4/2606    | 28/23843  | 0.36684  | 0.663168 | 0.630601 | Mir23a/Mir   |
| GO_BP_m1GO:007074response tr 4/2606    | 28/23843  | 0.36684  | 0.663168 | 0.630601 | Cfl1/Foxa2,  |
| GO_BP_m1GO:190027regulation 4/2606     | 28/23843  | 0.36684  | 0.663168 | 0.630601 | Abl2/Adcy    |
| GO_BP_m1GO:190217regulation 4/2606     | 28/23843  | 0.36684  | 0.663168 | 0.630601 | Gpx1/Hsph    |
| GO_BP_m1GO:190274positive reç 4/2606   | 28/23843  | 0.36684  | 0.663168 | 0.630601 | Cfl1/Enpp2   |
| GO_BP_m1GO:19028Cregulation 4/2606     | 28/23843  | 0.36684  | 0.663168 | 0.630601 | Fmr1/Rab5    |
| GO_BP_m1GO:006027cilium asse 35/2606   | 300/23843 | 0.367064 | 0.663168 | 0.630601 | B9d1/Bbs1    |
| GO_BP_m1GO:00026Epositive reç 6/2606   | 45/23843  | 0.368644 | 0.663168 | 0.630601 | lfng/Ptprc/  |
| GO_BP_m1GO:003164protein deç 6/2606    | 45/23843  | 0.368644 | 0.663168 | 0.630601 | Gsn/Isoc2a   |
| GO_BP_m1GO:003271negative re 6/2606    | 45/23843  | 0.368644 | 0.663168 | 0.630601 | C1qtnf3/Il1  |
| GO_BP_m1GO:004591negative re 6/2606    | 45/23843  | 0.368644 | 0.663168 | 0.630601 | C1qtnf3/Cc   |
| GO_BP_m1GO:00607Epositive reç 6/2606   | 45/23843  | 0.368644 | 0.663168 | 0.630601 | Il7/Mmp12    |
| GO_BP_m1GO:00901Eregulation 6/2606     | 45/23843  | 0.368644 | 0.663168 | 0.630601 | Bnip3/Cide   |
| GO_BP_m1GO:00019Eendothelial 16/2606   | 132/23843 | 0.369695 | 0.663168 | 0.630601 | Arg1/Atp5:   |
| GO_BP_m1GO:000032re-entry in 1/2606    | 4/23843   | 0.370616 | 0.663168 | 0.630601 | Myc          |
| GO_BP_m1GO:000042carbon cat: 1/2606    | 4/23843   | 0.370616 | 0.663168 | 0.630601 | Foxa2        |
| GO_BP_m1GO:00004Ecarbon cat: 1/2606    | 4/23843   | 0.370616 | 0.663168 | 0.630601 | Foxa2        |



|                               |        |         |          |          |          |         |
|-------------------------------|--------|---------|----------|----------|----------|---------|
| GO_BP_m1GO:000045snoRNA gu    | 1/2606 | 4/23843 | 0.370616 | 0.663168 | 0.630601 | Nop10   |
| GO_BP_m1GO:000071meiotic mi   | 1/2606 | 4/23843 | 0.370616 | 0.663168 | 0.630601 | Msh3    |
| GO_BP_m1GO:000096regulation   | 1/2606 | 4/23843 | 0.370616 | 0.663168 | 0.630601 | Pnpt1   |
| GO_BP_m1GO:000096mitochond    | 1/2606 | 4/23843 | 0.370616 | 0.663168 | 0.630601 | Pnpt1   |
| GO_BP_m1GO:000169histamine r  | 1/2606 | 4/23843 | 0.370616 | 0.663168 | 0.630601 | Hdc     |
| GO_BP_m1GO:000175somite spe   | 1/2606 | 4/23843 | 0.370616 | 0.663168 | 0.630601 | Meox2   |
| GO_BP_m1GO:000183trophectod   | 1/2606 | 4/23843 | 0.370616 | 0.663168 | 0.630601 | Esrb    |
| GO_BP_m1GO:000188Mullerian c  | 1/2606 | 4/23843 | 0.370616 | 0.663168 | 0.630601 | Amh     |
| GO_BP_m1GO:000188selenium c   | 1/2606 | 4/23843 | 0.370616 | 0.663168 | 0.630601 | Sephs1  |
| GO_BP_m1GO:000191negative re  | 1/2606 | 4/23843 | 0.370616 | 0.663168 | 0.630601 | Ptpcr   |
| GO_BP_m1GO:000192negative re  | 1/2606 | 4/23843 | 0.370616 | 0.663168 | 0.630601 | Pcsk9   |
| GO_BP_m1GO:000192B-1 B cell c | 1/2606 | 4/23843 | 0.370616 | 0.663168 | 0.630601 | Cmtm7   |
| GO_BP_m1GO:000192exocyst ass  | 1/2606 | 4/23843 | 0.370616 | 0.663168 | 0.630601 | Ncam1   |
| GO_BP_m1GO:000202reduction c  | 1/2606 | 4/23843 | 0.370616 | 0.663168 | 0.630601 | Prlh    |
| GO_BP_m1GO:000215desmosom     | 1/2606 | 4/23843 | 0.370616 | 0.663168 | 0.630601 | Prkca   |
| GO_BP_m1GO:000235serotonin ̢  | 1/2606 | 4/23843 | 0.370616 | 0.663168 | 0.630601 | P2rx1   |
| GO_BP_m1GO:000243chronic infl | 1/2606 | 4/23843 | 0.370616 | 0.663168 | 0.630601 | Il10    |
| GO_BP_m1GO:000244serotonin s  | 1/2606 | 4/23843 | 0.370616 | 0.663168 | 0.630601 | P2rx1   |
| GO_BP_m1GO:000252acute inflar | 1/2606 | 4/23843 | 0.370616 | 0.663168 | 0.630601 | Casp6   |
| GO_BP_m1GO:000258regulation   | 1/2606 | 4/23843 | 0.370616 | 0.663168 | 0.630601 | Pycard  |
| GO_BP_m1GO:000292negative re  | 1/2606 | 4/23843 | 0.370616 | 0.663168 | 0.630601 | Susd4   |
| GO_BP_m1GO:000319tricuspid v  | 1/2606 | 4/23843 | 0.370616 | 0.663168 | 0.630601 | Zfpm2   |
| GO_BP_m1GO:000341growth pla   | 1/2606 | 4/23843 | 0.370616 | 0.663168 | 0.630601 | Por     |
| GO_BP_m1GO:000343growth pla   | 1/2606 | 4/23843 | 0.370616 | 0.663168 | 0.630601 | Poc1a   |
| GO_BP_m1GO:000604glucosamir   | 1/2606 | 4/23843 | 0.370616 | 0.663168 | 0.630601 | Ogt     |
| GO_BP_m1GO:000620dGTP catak   | 1/2606 | 4/23843 | 0.370616 | 0.663168 | 0.630601 | Nudt1   |
| GO_BP_m1GO:000634maintenan    | 1/2606 | 4/23843 | 0.370616 | 0.663168 | 0.630601 | Hdac2   |
| GO_BP_m1GO:000642arginyl-tRN  | 1/2606 | 4/23843 | 0.370616 | 0.663168 | 0.630601 | Rars2   |
| GO_BP_m1GO:000653glutamate    | 1/2606 | 4/23843 | 0.370616 | 0.663168 | 0.630601 | Gls     |
| GO_BP_m1GO:000655leucine cat  | 1/2606 | 4/23843 | 0.370616 | 0.663168 | 0.630601 | Mccc2   |
| GO_BP_m1GO:000656proline bio  | 1/2606 | 4/23843 | 0.370616 | 0.663168 | 0.630601 | Pycr2   |
| GO_BP_m1GO:000656proline cat  | 1/2606 | 4/23843 | 0.370616 | 0.663168 | 0.630601 | Aldh4a1 |
| GO_BP_m1GO:000656L-serine bi  | 1/2606 | 4/23843 | 0.370616 | 0.663168 | 0.630601 | Psph    |
| GO_BP_m1GO:000668galactosylc  | 1/2606 | 4/23843 | 0.370616 | 0.663168 | 0.630601 | B4galt3 |
| GO_BP_m1GO:000674NADP bios    | 1/2606 | 4/23843 | 0.370616 | 0.663168 | 0.630601 | Idh2    |
| GO_BP_m1GO:000698activation c | 1/2606 | 4/23843 | 0.370616 | 0.663168 | 0.630601 | Vapb    |
| GO_BP_m1GO:000702post-chap    | 1/2606 | 4/23843 | 0.370616 | 0.663168 | 0.630601 | Tbca    |
| GO_BP_m1GO:000722signal trans | 1/2606 | 4/23843 | 0.370616 | 0.663168 | 0.630601 | Smo     |
| GO_BP_m1GO:000741ventral mic  | 1/2606 | 4/23843 | 0.370616 | 0.663168 | 0.630601 | Smo     |
| GO_BP_m1GO:000762negative re  | 1/2606 | 4/23843 | 0.370616 | 0.663168 | 0.630601 | Avpr1a  |
| GO_BP_m1GO:000806establishm   | 1/2606 | 4/23843 | 0.370616 | 0.663168 | 0.630601 | Cldn1   |
| GO_BP_m1GO:000959detection c  | 1/2606 | 4/23843 | 0.370616 | 0.663168 | 0.630601 | Serinc5 |
| GO_BP_m1GO:001004response tr  | 1/2606 | 4/23843 | 0.370616 | 0.663168 | 0.630601 | Snca    |
| GO_BP_m1GO:001028response tr  | 1/2606 | 4/23843 | 0.370616 | 0.663168 | 0.630601 | Ncam1   |
| GO_BP_m1GO:001053positive re  | 1/2606 | 4/23843 | 0.370616 | 0.663168 | 0.630601 | Il12b   |
| GO_BP_m1GO:001063positive re  | 1/2606 | 4/23843 | 0.370616 | 0.663168 | 0.630601 | Park2   |
| GO_BP_m1GO:001072regulation   | 1/2606 | 4/23843 | 0.370616 | 0.663168 | 0.630601 | Senp1   |
| GO_BP_m1GO:001073positive re  | 1/2606 | 4/23843 | 0.370616 | 0.663168 | 0.630601 | Mkl1    |

|          |           |              |        |         |          |          |          |            |
|----------|-----------|--------------|--------|---------|----------|----------|----------|------------|
| GO_BP_m1 | GO:001084 | positive re  | 1/2606 | 4/23843 | 0.370616 | 0.663168 | 0.630601 | Uts2r      |
| GO_BP_m1 | GO:001084 | regulation   | 1/2606 | 4/23843 | 0.370616 | 0.663168 | 0.630601 | Tpr        |
| GO_BP_m1 | GO:001085 | negative re  | 1/2606 | 4/23843 | 0.370616 | 0.663168 | 0.630601 | Nr1h2      |
| GO_BP_m1 | GO:001085 | negative re  | 1/2606 | 4/23843 | 0.370616 | 0.663168 | 0.630601 | Plin5      |
| GO_BP_m1 | GO:001400 | microglia d  | 1/2606 | 4/23843 | 0.370616 | 0.663168 | 0.630601 | Itgam      |
| GO_BP_m1 | GO:001400 | microglia d  | 1/2606 | 4/23843 | 0.370616 | 0.663168 | 0.630601 | Itgam      |
| GO_BP_m1 | GO:001402 | neural plat  | 1/2606 | 4/23843 | 0.370616 | 0.663168 | 0.630601 | Zfp568     |
| GO_BP_m1 | GO:001482 | vein smoot   | 1/2606 | 4/23843 | 0.370616 | 0.663168 | 0.630601 | Ednrb      |
| GO_BP_m1 | GO:001483 | striated mu  | 1/2606 | 4/23843 | 0.370616 | 0.663168 | 0.630601 | Gsn        |
| GO_BP_m1 | GO:001610 | diterpenoic  | 1/2606 | 4/23843 | 0.370616 | 0.663168 | 0.630601 | Crabp1     |
| GO_BP_m1 | GO:001612 | phytostero   | 1/2606 | 4/23843 | 0.370616 | 0.663168 | 0.630601 | Fdft1      |
| GO_BP_m1 | GO:001612 | phytostero   | 1/2606 | 4/23843 | 0.370616 | 0.663168 | 0.630601 | Fdft1      |
| GO_BP_m1 | GO:001624 | autophago    | 1/2606 | 4/23843 | 0.370616 | 0.663168 | 0.630601 | Snap29     |
| GO_BP_m1 | GO:001625 | selenocyste  | 1/2606 | 4/23843 | 0.370616 | 0.663168 | 0.630601 | Sephs1     |
| GO_BP_m1 | GO:001656 | protein im   | 1/2606 | 4/23843 | 0.370616 | 0.663168 | 0.630601 | Pex5       |
| GO_BP_m1 | GO:001807 | N-terminal   | 1/2606 | 4/23843 | 0.370616 | 0.663168 | 0.630601 | Kat2b      |
| GO_BP_m1 | GO:001821 | protein car  | 1/2606 | 4/23843 | 0.370616 | 0.663168 | 0.630601 | Vkorc111   |
| GO_BP_m1 | GO:001833 | protein suc  | 1/2606 | 4/23843 | 0.370616 | 0.663168 | 0.630601 | Kat2a      |
| GO_BP_m1 | GO:001834 | protein far  | 1/2606 | 4/23843 | 0.370616 | 0.663168 | 0.630601 | Fnta       |
| GO_BP_m1 | GO:001904 | viral latenc | 1/2606 | 4/23843 | 0.370616 | 0.663168 | 0.630601 | Nucks1     |
| GO_BP_m1 | GO:001924 | methylglyo   | 1/2606 | 4/23843 | 0.370616 | 0.663168 | 0.630601 | Haghl      |
| GO_BP_m1 | GO:001924 | lactate bio  | 1/2606 | 4/23843 | 0.370616 | 0.663168 | 0.630601 | Ldha       |
| GO_BP_m1 | GO:001927 | UDP-N-ac     | 1/2606 | 4/23843 | 0.370616 | 0.663168 | 0.630601 | Csgalnact1 |
| GO_BP_m1 | GO:001937 | galactolipic | 1/2606 | 4/23843 | 0.370616 | 0.663168 | 0.630601 | B4galt3    |
| GO_BP_m1 | GO:001948 | beta-alanir  | 1/2606 | 4/23843 | 0.370616 | 0.663168 | 0.630601 | Dpys       |
| GO_BP_m1 | GO:002155 | midbrain-f   | 1/2606 | 4/23843 | 0.370616 | 0.663168 | 0.630601 | Kdm2b      |
| GO_BP_m1 | GO:002157 | rhombome     | 1/2606 | 4/23843 | 0.370616 | 0.663168 | 0.630601 | Hoxb1      |
| GO_BP_m1 | GO:002159 | cerebellum   | 1/2606 | 4/23843 | 0.370616 | 0.663168 | 0.630601 | Cend1      |
| GO_BP_m1 | GO:002161 | glossophar   | 1/2606 | 4/23843 | 0.370616 | 0.663168 | 0.630601 | Hoxa3      |
| GO_BP_m1 | GO:002165 | vestibulocc  | 1/2606 | 4/23843 | 0.370616 | 0.663168 | 0.630601 | Atp8b1     |
| GO_BP_m1 | GO:002167 | third ventri | 1/2606 | 4/23843 | 0.370616 | 0.663168 | 0.630601 | Kdm2b      |
| GO_BP_m1 | GO:002193 | smoothene    | 1/2606 | 4/23843 | 0.370616 | 0.663168 | 0.630601 | Smo        |
| GO_BP_m1 | GO:002200 | convergent   | 1/2606 | 4/23843 | 0.370616 | 0.663168 | 0.630601 | Zfp568     |
| GO_BP_m1 | GO:002200 | central ner  | 1/2606 | 4/23843 | 0.370616 | 0.663168 | 0.630601 | Wnt7a      |
| GO_BP_m1 | GO:003003 | microspike   | 1/2606 | 4/23843 | 0.370616 | 0.663168 | 0.630601 | Fscn1      |
| GO_BP_m1 | GO:003004 | actin filam  | 1/2606 | 4/23843 | 0.370616 | 0.663168 | 0.630601 | Cfl1       |
| GO_BP_m1 | GO:003009 | protein rep  | 1/2606 | 4/23843 | 0.370616 | 0.663168 | 0.630601 | Msrb1      |
| GO_BP_m1 | GO:003112 | snRNA pse    | 1/2606 | 4/23843 | 0.370616 | 0.663168 | 0.630601 | Nop10      |
| GO_BP_m1 | GO:003144 | fast-twitch  | 1/2606 | 4/23843 | 0.370616 | 0.663168 | 0.630601 | Mylk2      |
| GO_BP_m1 | GO:003220 | telomere r   | 1/2606 | 4/23843 | 0.370616 | 0.663168 | 0.630601 | Pcna       |
| GO_BP_m1 | GO:003229 | peripheral   | 1/2606 | 4/23843 | 0.370616 | 0.663168 | 0.630601 | Ahnak2     |
| GO_BP_m1 | GO:003249 | detection c  | 1/2606 | 4/23843 | 0.370616 | 0.663168 | 0.630601 | Scarb1     |
| GO_BP_m1 | GO:003284 | positive re  | 1/2606 | 4/23843 | 0.370616 | 0.663168 | 0.630601 | Avpr1a     |
| GO_BP_m1 | GO:003297 | regulation   | 1/2606 | 4/23843 | 0.370616 | 0.663168 | 0.630601 | Mylk2      |
| GO_BP_m1 | GO:003302 | negative re  | 1/2606 | 4/23843 | 0.370616 | 0.663168 | 0.630601 | Kitl       |
| GO_BP_m1 | GO:003465 | retinoic aci | 1/2606 | 4/23843 | 0.370616 | 0.663168 | 0.630601 | Crabp1     |
| GO_BP_m1 | GO:003510 | operant co   | 1/2606 | 4/23843 | 0.370616 | 0.663168 | 0.630601 | Tacr2      |
| GO_BP_m1 | GO:003529 | trunk segr   | 1/2606 | 4/23843 | 0.370616 | 0.663168 | 0.630601 | Sema3f     |

|                                               |        |         |          |          |          |          |
|-----------------------------------------------|--------|---------|----------|----------|----------|----------|
| GO_BP_m1GO:003552monoubiquitin                | 1/2606 | 4/23843 | 0.370616 | 0.663168 | 0.630601 | Asxl1    |
| GO_BP_m1GO:003552monoubiquitin                | 1/2606 | 4/23843 | 0.370616 | 0.663168 | 0.630601 | Asxl1    |
| GO_BP_m1GO:003555G-protein-coupled receptor   | 1/2606 | 4/23843 | 0.370616 | 0.663168 | 0.630601 | P2ry1    |
| GO_BP_m1GO:003561histone H2                   | 1/2606 | 4/23843 | 0.370616 | 0.663168 | 0.630601 | Usp7     |
| GO_BP_m1GO:003565CD8-positive T cell          | 1/2606 | 4/23843 | 0.370616 | 0.663168 | 0.630601 | Ripk3    |
| GO_BP_m1GO:003572intraciliary transport       | 1/2606 | 4/23843 | 0.370616 | 0.663168 | 0.630601 | Ift52    |
| GO_BP_m1GO:003575cell migration               | 1/2606 | 4/23843 | 0.370616 | 0.663168 | 0.630601 | Pdgfra   |
| GO_BP_m1GO:003575metanephros                  | 1/2606 | 4/23843 | 0.370616 | 0.663168 | 0.630601 | Pdgfra   |
| GO_BP_m1GO:003597protein degradation          | 1/2606 | 4/23843 | 0.370616 | 0.663168 | 0.630601 | Man1b1   |
| GO_BP_m1GO:003598response to hypoxia          | 1/2606 | 4/23843 | 0.370616 | 0.663168 | 0.630601 | Hdac2    |
| GO_BP_m1GO:003598cellular response to hypoxia | 1/2606 | 4/23843 | 0.370616 | 0.663168 | 0.630601 | Hdac2    |
| GO_BP_m1GO:003599tendon cell                  | 1/2606 | 4/23843 | 0.370616 | 0.663168 | 0.630601 | Mkx      |
| GO_BP_m1GO:003599tendon formation             | 1/2606 | 4/23843 | 0.370616 | 0.663168 | 0.630601 | Mkx      |
| GO_BP_m1GO:003599detection of hypoxia         | 1/2606 | 4/23843 | 0.370616 | 0.663168 | 0.630601 | Cav3     |
| GO_BP_m1GO:003648trunk neuron                 | 1/2606 | 4/23843 | 0.370616 | 0.663168 | 0.630601 | Sema3f   |
| GO_BP_m1GO:003648ventral trunk neuron         | 1/2606 | 4/23843 | 0.370616 | 0.663168 | 0.630601 | Sema3f   |
| GO_BP_m1GO:003653protein derivative           | 1/2606 | 4/23843 | 0.370616 | 0.663168 | 0.630601 | Man1b1   |
| GO_BP_m1GO:003653protein alpha                | 1/2606 | 4/23843 | 0.370616 | 0.663168 | 0.630601 | Man1b1   |
| GO_BP_m1GO:003802reelin-mediated              | 1/2606 | 4/23843 | 0.370616 | 0.663168 | 0.630601 | Vldlr    |
| GO_BP_m1GO:003809Fc-epsilon                   | 1/2606 | 4/23843 | 0.370616 | 0.663168 | 0.630601 | Ms4a2    |
| GO_BP_m1GO:003813negative regulation          | 1/2606 | 4/23843 | 0.370616 | 0.663168 | 0.630601 | Bbs2     |
| GO_BP_m1GO:004222interleukin                  | 1/2606 | 4/23843 | 0.370616 | 0.663168 | 0.630601 | Ccl20    |
| GO_BP_m1GO:004266positive regulation          | 1/2606 | 4/23843 | 0.370616 | 0.663168 | 0.630601 | Wnt3a    |
| GO_BP_m1GO:004277mitochondrion                | 1/2606 | 4/23843 | 0.370616 | 0.663168 | 0.630601 | Atp5o    |
| GO_BP_m1GO:004309purine nucleotide            | 1/2606 | 4/23843 | 0.370616 | 0.663168 | 0.630601 | Aprt     |
| GO_BP_m1GO:004313DNA replication              | 1/2606 | 4/23843 | 0.370616 | 0.663168 | 0.630601 | Fen1     |
| GO_BP_m1GO:004315induction of                 | 1/2606 | 4/23843 | 0.370616 | 0.663168 | 0.630601 | Spon2    |
| GO_BP_m1GO:004331positive regulation          | 1/2606 | 4/23843 | 0.370616 | 0.663168 | 0.630601 | Itgam    |
| GO_BP_m1GO:004333corticotropin                | 1/2606 | 4/23843 | 0.370616 | 0.663168 | 0.630601 | Tnfrsf11 |
| GO_BP_m1GO:004333regulation of                | 1/2606 | 4/23843 | 0.370616 | 0.663168 | 0.630601 | Tnfrsf11 |
| GO_BP_m1GO:004343response to hypoxia          | 1/2606 | 4/23843 | 0.370616 | 0.663168 | 0.630601 | Nr4a1    |
| GO_BP_m1GO:004346proton-transport             | 1/2606 | 4/23843 | 0.370616 | 0.663168 | 0.630601 | Atpaf1   |
| GO_BP_m1GO:004346regulation of                | 1/2606 | 4/23843 | 0.370616 | 0.663168 | 0.630601 | Tigar    |
| GO_BP_m1GO:004398histone H4                   | 1/2606 | 4/23843 | 0.370616 | 0.663168 | 0.630601 | Prmt1    |
| GO_BP_m1GO:004413cellular alpha               | 1/2606 | 4/23843 | 0.370616 | 0.663168 | 0.630601 | Fdft1    |
| GO_BP_m1GO:004413cellular alpha               | 1/2606 | 4/23843 | 0.370616 | 0.663168 | 0.630601 | Fdft1    |
| GO_BP_m1GO:004452regulation of                | 1/2606 | 4/23843 | 0.370616 | 0.663168 | 0.630601 | Fastkd1  |
| GO_BP_m1GO:004483multi-organism               | 1/2606 | 4/23843 | 0.370616 | 0.663168 | 0.630601 | Hyal2    |
| GO_BP_m1GO:004559negative regulation          | 1/2606 | 4/23843 | 0.370616 | 0.663168 | 0.630601 | Ctla4    |
| GO_BP_m1GO:004593negative regulation          | 1/2606 | 4/23843 | 0.370616 | 0.663168 | 0.630601 | Cpeb3    |
| GO_BP_m1GO:004601positive regulation          | 1/2606 | 4/23843 | 0.370616 | 0.663168 | 0.630601 | Foxa2    |
| GO_BP_m1GO:004612pyrimidine                   | 1/2606 | 4/23843 | 0.370616 | 0.663168 | 0.630601 | Dpyd     |
| GO_BP_m1GO:004616glycerol-3-phosphate         | 1/2606 | 4/23843 | 0.370616 | 0.663168 | 0.630601 | Gk2      |
| GO_BP_m1GO:004623spermine                     | 1/2606 | 4/23843 | 0.370616 | 0.663168 | 0.630601 | Sat1     |
| GO_BP_m1GO:004636GDP-L-fucose                 | 1/2606 | 4/23843 | 0.370616 | 0.663168 | 0.630601 | Fut8     |
| GO_BP_m1GO:004663positive regulation          | 1/2606 | 4/23843 | 0.370616 | 0.663168 | 0.630601 | Ranbp1   |
| GO_BP_m1GO:004823Golgi transport              | 1/2606 | 4/23843 | 0.370616 | 0.663168 | 0.630601 | Gbf1     |
| GO_BP_m1GO:004823COPII coat                   | 1/2606 | 4/23843 | 0.370616 | 0.663168 | 0.630601 | Gbf1     |

|                                                    |        |         |          |          |          |          |
|----------------------------------------------------|--------|---------|----------|----------|----------|----------|
| GO_BP_m1GO:004876sarcomeroregulation               | 1/2606 | 4/23843 | 0.370616 | 0.663168 | 0.630601 | Mylk2    |
| GO_BP_m1GO:005114regulation                        | 1/2606 | 4/23843 | 0.370616 | 0.663168 | 0.630601 | Il12b    |
| GO_BP_m1GO:005114positive regulation               | 1/2606 | 4/23843 | 0.370616 | 0.663168 | 0.630601 | Il12b    |
| GO_BP_m1GO:005130female meiosis                    | 1/2606 | 4/23843 | 0.370616 | 0.663168 | 0.630601 | Sycp3    |
| GO_BP_m1GO:005146positive regulation               | 1/2606 | 4/23843 | 0.370616 | 0.663168 | 0.630601 | Galr1    |
| GO_BP_m1GO:005159response to hypoxia               | 1/2606 | 4/23843 | 0.370616 | 0.663168 | 0.630601 | Bche     |
| GO_BP_m1GO:005159methylation                       | 1/2606 | 4/23843 | 0.370616 | 0.663168 | 0.630601 | Haghl    |
| GO_BP_m1GO:005161negative regulation               | 1/2606 | 4/23843 | 0.370616 | 0.663168 | 0.630601 | Snca     |
| GO_BP_m1GO:005172protein degradation               | 1/2606 | 4/23843 | 0.370616 | 0.663168 | 0.630601 | Macrold2 |
| GO_BP_m1GO:005179medium-chain fatty acid oxidation | 1/2606 | 4/23843 | 0.370616 | 0.663168 | 0.630601 | Abhd1    |
| GO_BP_m1GO:005190negative regulation               | 1/2606 | 4/23843 | 0.370616 | 0.663168 | 0.630601 | Bok      |
| GO_BP_m1GO:005191positive regulation               | 1/2606 | 4/23843 | 0.370616 | 0.663168 | 0.630601 | F11      |
| GO_BP_m1GO:006016negative regulation               | 1/2606 | 4/23843 | 0.370616 | 0.663168 | 0.630601 | Drd3     |
| GO_BP_m1GO:006016regulation                        | 1/2606 | 4/23843 | 0.370616 | 0.663168 | 0.630601 | Acpp     |
| GO_BP_m1GO:006021endocardium                       | 1/2606 | 4/23843 | 0.370616 | 0.663168 | 0.630601 | Sox18    |
| GO_BP_m1GO:006037regulation                        | 1/2606 | 4/23843 | 0.370616 | 0.663168 | 0.630601 | Itgam    |
| GO_BP_m1GO:006045left lung development             | 1/2606 | 4/23843 | 0.370616 | 0.663168 | 0.630601 | Cfc1     |
| GO_BP_m1GO:006047acrosomal development             | 1/2606 | 4/23843 | 0.370616 | 0.663168 | 0.630601 | Hyal3    |
| GO_BP_m1GO:006059mammary gland development         | 1/2606 | 4/23843 | 0.370616 | 0.663168 | 0.630601 | Pax3     |
| GO_BP_m1GO:006080regulation                        | 1/2606 | 4/23843 | 0.370616 | 0.663168 | 0.630601 | Stk3     |
| GO_BP_m1GO:006083ciliary receptor activity         | 1/2606 | 4/23843 | 0.370616 | 0.663168 | 0.630601 | Ssna1    |
| GO_BP_m1GO:006105dermatomectosome development      | 1/2606 | 4/23843 | 0.370616 | 0.663168 | 0.630601 | Wnt3a    |
| GO_BP_m1GO:006108negative regulation               | 1/2606 | 4/23843 | 0.370616 | 0.663168 | 0.630601 | H2afy    |
| GO_BP_m1GO:006111dense core organization           | 1/2606 | 4/23843 | 0.370616 | 0.663168 | 0.630601 | Prkca    |
| GO_BP_m1GO:006111pancreas development              | 1/2606 | 4/23843 | 0.370616 | 0.663168 | 0.630601 | Smo      |
| GO_BP_m1GO:006118regulation                        | 1/2606 | 4/23843 | 0.370616 | 0.663168 | 0.630601 | Wnt3a    |
| GO_BP_m1GO:006147T follicular development          | 1/2606 | 4/23843 | 0.370616 | 0.663168 | 0.630601 | Gpr183   |
| GO_BP_m1GO:006172methylation                       | 1/2606 | 4/23843 | 0.370616 | 0.663168 | 0.630601 | Haghl    |
| GO_BP_m1GO:006173protein lipolysis                 | 1/2606 | 4/23843 | 0.370616 | 0.663168 | 0.630601 | Wipi2    |
| GO_BP_m1GO:006181telomeric DNA organization        | 1/2606 | 4/23843 | 0.370616 | 0.663168 | 0.630601 | Xrcc1    |
| GO_BP_m1GO:006188regulation                        | 1/2606 | 4/23843 | 0.370616 | 0.663168 | 0.630601 | Ttbk1    |
| GO_BP_m1GO:007009negative regulation               | 1/2606 | 4/23843 | 0.370616 | 0.663168 | 0.630601 | Cartpt   |
| GO_BP_m1GO:007012mitochondrial development         | 1/2606 | 4/23843 | 0.370616 | 0.663168 | 0.630601 | Mtrf1    |
| GO_BP_m1GO:007021protein polymerization            | 1/2606 | 4/23843 | 0.370616 | 0.663168 | 0.630601 | Tnks     |
| GO_BP_m1GO:007021protein autophagy                 | 1/2606 | 4/23843 | 0.370616 | 0.663168 | 0.630601 | Tnks     |
| GO_BP_m1GO:007034positive regulation               | 1/2606 | 4/23843 | 0.370616 | 0.663168 | 0.630601 | Fgf16    |
| GO_BP_m1GO:007035actin polymerization              | 1/2606 | 4/23843 | 0.370616 | 0.663168 | 0.630601 | Nckap1l  |
| GO_BP_m1GO:007038Harderian gland development       | 1/2606 | 4/23843 | 0.370616 | 0.663168 | 0.630601 | Aldh1a3  |
| GO_BP_m1GO:007060regulation                        | 1/2606 | 4/23843 | 0.370616 | 0.663168 | 0.630601 | Naa10    |
| GO_BP_m1GO:007066mast cell proliferation           | 1/2606 | 4/23843 | 0.370616 | 0.663168 | 0.630601 | Kitl     |
| GO_BP_m1GO:007066regulation                        | 1/2606 | 4/23843 | 0.370616 | 0.663168 | 0.630601 | Kitl     |
| GO_BP_m1GO:007066positive regulation               | 1/2606 | 4/23843 | 0.370616 | 0.663168 | 0.630601 | Kitl     |
| GO_BP_m1GO:007067response to hypoxia               | 1/2606 | 4/23843 | 0.370616 | 0.663168 | 0.630601 | Ticam2   |
| GO_BP_m1GO:007083dehydroascorbate oxidation        | 1/2606 | 4/23843 | 0.370616 | 0.663168 | 0.630601 | Slc2a1   |
| GO_BP_m1GO:007094neutrophil development            | 1/2606 | 4/23843 | 0.370616 | 0.663168 | 0.630601 | Arg1     |
| GO_BP_m1GO:007094regulation                        | 1/2606 | 4/23843 | 0.370616 | 0.663168 | 0.630601 | Arg1     |
| GO_BP_m1GO:007107negative regulation               | 1/2606 | 4/23843 | 0.370616 | 0.663168 | 0.630601 | Pdgfra   |
| GO_BP_m1GO:007137cellular respiration              | 1/2606 | 4/23843 | 0.370616 | 0.663168 | 0.630601 | Nr4a1    |

|                                     |         |          |          |          |         |
|-------------------------------------|---------|----------|----------|----------|---------|
| GO_BP_m1GO:007172response tr1/2606  | 4/23843 | 0.370616 | 0.663168 | 0.630601 | Cd36    |
| GO_BP_m1GO:007172cellular res1/2606 | 4/23843 | 0.370616 | 0.663168 | 0.630601 | Cd36    |
| GO_BP_m1GO:007181tail-anchor 1/2606 | 4/23843 | 0.370616 | 0.663168 | 0.630601 | Wrb     |
| GO_BP_m1GO:007192endocanna1/2606    | 4/23843 | 0.370616 | 0.663168 | 0.630601 | Mgll    |
| GO_BP_m1GO:007205juxtaglome1/2606   | 4/23843 | 0.370616 | 0.663168 | 0.630601 | Pou3f3  |
| GO_BP_m1GO:007205specificatio1/2606 | 4/23843 | 0.370616 | 0.663168 | 0.630601 | Irx2    |
| GO_BP_m1GO:007205metaneph1/2606     | 4/23843 | 0.370616 | 0.663168 | 0.630601 | Smo     |
| GO_BP_m1GO:00721Cregulation 1/2606  | 4/23843 | 0.370616 | 0.663168 | 0.630601 | Gdnf    |
| GO_BP_m1GO:00721Cpositive re1/2606  | 4/23843 | 0.370616 | 0.663168 | 0.630601 | Gdnf    |
| GO_BP_m1GO:00721Cpositive re1/2606  | 4/23843 | 0.370616 | 0.663168 | 0.630601 | Gdnf    |
| GO_BP_m1GO:007216metaneph1/2606     | 4/23843 | 0.370616 | 0.663168 | 0.630601 | Osr1    |
| GO_BP_m1GO:007218mesoneph1/2606     | 4/23843 | 0.370616 | 0.663168 | 0.630601 | Osr1    |
| GO_BP_m1GO:007222metaneph1/2606     | 4/23843 | 0.370616 | 0.663168 | 0.630601 | Wt1     |
| GO_BP_m1GO:007223metaneph1/2606     | 4/23843 | 0.370616 | 0.663168 | 0.630601 | Pou3f3  |
| GO_BP_m1GO:007226metaneph1/2606     | 4/23843 | 0.370616 | 0.663168 | 0.630601 | Wt1     |
| GO_BP_m1GO:007238plus-end-c1/2606   | 4/23843 | 0.370616 | 0.663168 | 0.630601 | Kif23   |
| GO_BP_m1GO:007238plus-end-c1/2606   | 4/23843 | 0.370616 | 0.663168 | 0.630601 | Kif23   |
| GO_BP_m1GO:007242response tr1/2606  | 4/23843 | 0.370616 | 0.663168 | 0.630601 | Fbxo18  |
| GO_BP_m1GO:007271response tr1/2606  | 4/23843 | 0.370616 | 0.663168 | 0.630601 | Rpl23   |
| GO_BP_m1GO:007271cellular res1/2606 | 4/23843 | 0.370616 | 0.663168 | 0.630601 | Slc31a1 |
| GO_BP_m1GO:00897Cprotein kin.1/2606 | 4/23843 | 0.370616 | 0.663168 | 0.630601 | Prkd3   |
| GO_BP_m1GO:00901Epositive re1/2606  | 4/23843 | 0.370616 | 0.663168 | 0.630601 | Smpd3   |
| GO_BP_m1GO:00901Epositive re1/2606  | 4/23843 | 0.370616 | 0.663168 | 0.630601 | Nr1h2   |
| GO_BP_m1GO:00902Cregulation 1/2606  | 4/23843 | 0.370616 | 0.663168 | 0.630601 | Lig3    |
| GO_BP_m1GO:00904Coxidative st1/2606 | 4/23843 | 0.370616 | 0.663168 | 0.630601 | Arntl   |
| GO_BP_m1GO:009721lysosomal r1/2606  | 4/23843 | 0.370616 | 0.663168 | 0.630601 | Mt3     |
| GO_BP_m1GO:009736chorionic tr1/2606 | 4/23843 | 0.370616 | 0.663168 | 0.630601 | Bok     |
| GO_BP_m1GO:00974Csympatheti1/2606   | 4/23843 | 0.370616 | 0.663168 | 0.630601 | Sema3f  |
| GO_BP_m1GO:00974Csympatheti1/2606   | 4/23843 | 0.370616 | 0.663168 | 0.630601 | Sema3f  |
| GO_BP_m1GO:009953synaptic sig1/2606 | 4/23843 | 0.370616 | 0.663168 | 0.630601 | Ntf5    |
| GO_BP_m1GO:009954trans-syna1/2606   | 4/23843 | 0.370616 | 0.663168 | 0.630601 | Ntf5    |
| GO_BP_m1GO:010001regulation 1/2606  | 4/23843 | 0.370616 | 0.663168 | 0.630601 | Wnt3a   |
| GO_BP_m1GO:010607histone suc1/2606  | 4/23843 | 0.370616 | 0.663168 | 0.630601 | Kat2a   |
| GO_BP_m1GO:01061Cregulation 1/2606  | 4/23843 | 0.370616 | 0.663168 | 0.630601 | Ssh1    |
| GO_BP_m1GO:19001Cnegative re1/2606  | 4/23843 | 0.370616 | 0.663168 | 0.630601 | Dand5   |
| GO_BP_m1GO:19001Cregulation 1/2606  | 4/23843 | 0.370616 | 0.663168 | 0.630601 | Dmrtc2  |
| GO_BP_m1GO:190014regulation 1/2606  | 4/23843 | 0.370616 | 0.663168 | 0.630601 | Dand5   |
| GO_BP_m1GO:19001Enegative re1/2606  | 4/23843 | 0.370616 | 0.663168 | 0.630601 | Rflna   |
| GO_BP_m1GO:190017regulation 1/2606  | 4/23843 | 0.370616 | 0.663168 | 0.630601 | Dand5   |
| GO_BP_m1GO:19002Cmesenchyr1/2606    | 4/23843 | 0.370616 | 0.663168 | 0.630601 | Wt1     |
| GO_BP_m1GO:190021regulation 1/2606  | 4/23843 | 0.370616 | 0.663168 | 0.630601 | Wt1     |
| GO_BP_m1GO:190021negative re1/2606  | 4/23843 | 0.370616 | 0.663168 | 0.630601 | Wt1     |
| GO_BP_m1GO:19013Cpositive re1/2606  | 4/23843 | 0.370616 | 0.663168 | 0.630601 | Endog   |
| GO_BP_m1GO:19013Eregulation 1/2606  | 4/23843 | 0.370616 | 0.663168 | 0.630601 | Bok     |
| GO_BP_m1GO:190152positive re1/2606  | 4/23843 | 0.370616 | 0.663168 | 0.630601 | Abcb1a  |
| GO_BP_m1GO:190153positive re1/2606  | 4/23843 | 0.370616 | 0.663168 | 0.630601 | Usp7    |
| GO_BP_m1GO:190166regulation 1/2606  | 4/23843 | 0.370616 | 0.663168 | 0.630601 | Szt2    |
| GO_BP_m1GO:190183negative re1/2606  | 4/23843 | 0.370616 | 0.663168 | 0.630601 | H2afy   |

|                                          |         |          |          |          |         |
|------------------------------------------|---------|----------|----------|----------|---------|
| GO_BP_m1GO:190184negative re1/2606       | 4/23843 | 0.370616 | 0.663168 | 0.630601 | Rad     |
| GO_BP_m1GO:190184positive re1/2606       | 4/23843 | 0.370616 | 0.663168 | 0.630601 | Cacnb2  |
| GO_BP_m1GO:190206response to1/2606       | 4/23843 | 0.370616 | 0.663168 | 0.630601 | Park2   |
| GO_BP_m1GO:190210negative re1/2606       | 4/23843 | 0.370616 | 0.663168 | 0.630601 | Bnip3   |
| GO_BP_m1GO:190220regulation 1/2606       | 4/23843 | 0.370616 | 0.663168 | 0.630601 | Ptpn1   |
| GO_BP_m1GO:190226positive re1/2606       | 4/23843 | 0.370616 | 0.663168 | 0.630601 | Akap6   |
| GO_BP_m1GO:190241regulation 1/2606       | 4/23843 | 0.370616 | 0.663168 | 0.630601 | Ankrd53 |
| GO_BP_m1GO:190246protein loc 1/2606      | 4/23843 | 0.370616 | 0.663168 | 0.630601 | Cfl1    |
| GO_BP_m1GO:190252regulation 1/2606       | 4/23843 | 0.370616 | 0.663168 | 0.630601 | Pdcd6   |
| GO_BP_m1GO:190256positive re1/2606       | 4/23843 | 0.370616 | 0.663168 | 0.630601 | Itgam   |
| GO_BP_m1GO:190256regulation 1/2606       | 4/23843 | 0.370616 | 0.663168 | 0.630601 | Stx4a   |
| GO_BP_m1GO:190274regulation 1/2606       | 4/23843 | 0.370616 | 0.663168 | 0.630601 | Cdkn1c  |
| GO_BP_m1GO:190289regulation 1/2606       | 4/23843 | 0.370616 | 0.663168 | 0.630601 | Cdh2    |
| GO_BP_m1GO:190305negative re1/2606       | 4/23843 | 0.370616 | 0.663168 | 0.630601 | Antxr1  |
| GO_BP_m1GO:190311positive re1/2606       | 4/23843 | 0.370616 | 0.663168 | 0.630601 | Acta2   |
| GO_BP_m1GO:190312regulation 1/2606       | 4/23843 | 0.370616 | 0.663168 | 0.630601 | Atf3    |
| GO_BP_m1GO:190322negative re1/2606       | 4/23843 | 0.370616 | 0.663168 | 0.630601 | Col5a1  |
| GO_BP_m1GO:190328regulation 1/2606       | 4/23843 | 0.370616 | 0.663168 | 0.630601 | Atp1b2  |
| GO_BP_m1GO:190358negative re1/2606       | 4/23843 | 0.370616 | 0.663168 | 0.630601 | Dll4    |
| GO_BP_m1GO:190359regulation 1/2606       | 4/23843 | 0.370616 | 0.663168 | 0.630601 | Cav1    |
| GO_BP_m1GO:190375regulation 1/2606       | 4/23843 | 0.370616 | 0.663168 | 0.630601 | Hsph1   |
| GO_BP_m1GO:190375negative re1/2606       | 4/23843 | 0.370616 | 0.663168 | 0.630601 | Hsph1   |
| GO_BP_m1GO:190379positive re1/2606       | 4/23843 | 0.370616 | 0.663168 | 0.630601 | Fxyd1   |
| GO_BP_m1GO:190384regulation 1/2606       | 4/23843 | 0.370616 | 0.663168 | 0.630601 | Ephb4   |
| GO_BP_m1GO:190384positive re1/2606       | 4/23843 | 0.370616 | 0.663168 | 0.630601 | Ephb4   |
| GO_BP_m1GO:190389positive re1/2606       | 4/23843 | 0.370616 | 0.663168 | 0.630601 | Bok     |
| GO_BP_m1GO:190396monounsaturated1/2606   | 4/23843 | 0.370616 | 0.663168 | 0.630601 | Scd4    |
| GO_BP_m1GO:190396monounsaturated1/2606   | 4/23843 | 0.370616 | 0.663168 | 0.630601 | Scd4    |
| GO_BP_m1GO:190397negative re1/2606       | 4/23843 | 0.370616 | 0.663168 | 0.630601 | Idh2    |
| GO_BP_m1GO:190438mannose transport1/2606 | 4/23843 | 0.370616 | 0.663168 | 0.630601 | Man1b1  |
| GO_BP_m1GO:190468regulation 1/2606       | 4/23843 | 0.370616 | 0.663168 | 0.630601 | Ythdf2  |
| GO_BP_m1GO:190471regulation 1/2606       | 4/23843 | 0.370616 | 0.663168 | 0.630601 | Snca    |
| GO_BP_m1GO:190471regulation 1/2606       | 4/23843 | 0.370616 | 0.663168 | 0.630601 | Ssh1    |
| GO_BP_m1GO:190474regulation 1/2606       | 4/23843 | 0.370616 | 0.663168 | 0.630601 | Tnks    |
| GO_BP_m1GO:190484positive re1/2606       | 4/23843 | 0.370616 | 0.663168 | 0.630601 | Fgf16   |
| GO_BP_m1GO:190499negative re1/2606       | 4/23843 | 0.370616 | 0.663168 | 0.630601 | Ccl28   |
| GO_BP_m1GO:190516positive re1/2606       | 4/23843 | 0.370616 | 0.663168 | 0.630601 | Blm     |
| GO_BP_m1GO:190527positive re1/2606       | 4/23843 | 0.370616 | 0.663168 | 0.630601 | Gdnf    |
| GO_BP_m1GO:190544positive re1/2606       | 4/23843 | 0.370616 | 0.663168 | 0.630601 | Cdk1    |
| GO_BP_m1GO:190546positive re1/2606       | 4/23843 | 0.370616 | 0.663168 | 0.630601 | E2f3    |
| GO_BP_m1GO:190566regulation 1/2606       | 4/23843 | 0.370616 | 0.663168 | 0.630601 | Calcr   |
| GO_BP_m1GO:190576regulation 1/2606       | 4/23843 | 0.370616 | 0.663168 | 0.630601 | Xrcc1   |
| GO_BP_m1GO:190576negative re1/2606       | 4/23843 | 0.370616 | 0.663168 | 0.630601 | Xrcc1   |
| GO_BP_m1GO:199008lens fiber cell1/2606   | 4/23843 | 0.370616 | 0.663168 | 0.630601 | E2f1    |
| GO_BP_m1GO:199041adrenomedullary1/2606   | 4/23843 | 0.370616 | 0.663168 | 0.630601 | Adm     |
| GO_BP_m1GO:199041cellular response1/2606 | 4/23843 | 0.370616 | 0.663168 | 0.630601 | Nfkb1   |
| GO_BP_m1GO:199048mRNA processing1/2606   | 4/23843 | 0.370616 | 0.663168 | 0.630601 | Trub1   |
| GO_BP_m1GO:200004positive re1/2606       | 4/23843 | 0.370616 | 0.663168 | 0.630601 | Wnt3a   |

|                                |          |           |          |          |          |               |
|--------------------------------|----------|-----------|----------|----------|----------|---------------|
| GO_BP_m1GO:20003C positive re  | 1/2606   | 4/23843   | 0.370616 | 0.663168 | 0.630601 | Smpd3         |
| GO_BP_m1GO:200041 regulation   | 1/2606   | 4/23843   | 0.370616 | 0.663168 | 0.630601 | Adam8         |
| GO_BP_m1GO:200041 positive re  | 1/2606   | 4/23843   | 0.370616 | 0.663168 | 0.630601 | Adam8         |
| GO_BP_m1GO:20005C positive re  | 1/2606   | 4/23843   | 0.370616 | 0.663168 | 0.630601 | Ccl4          |
| GO_BP_m1GO:200052 regulation   | 1/2606   | 4/23843   | 0.370616 | 0.663168 | 0.630601 | Ephb4         |
| GO_BP_m1GO:200052 positive re  | 1/2606   | 4/23843   | 0.370616 | 0.663168 | 0.630601 | Ephb4         |
| GO_BP_m1GO:200054 positive re  | 1/2606   | 4/23843   | 0.370616 | 0.663168 | 0.630601 | Fgf16         |
| GO_BP_m1GO:20005E positive re  | 1/2606   | 4/23843   | 0.370616 | 0.663168 | 0.630601 | Ptpn22        |
| GO_BP_m1GO:20005E regulation   | 1/2606   | 4/23843   | 0.370616 | 0.663168 | 0.630601 | Pdgfa         |
| GO_BP_m1GO:20006E negative re  | 1/2606   | 4/23843   | 0.370616 | 0.663168 | 0.630601 | Il1rn         |
| GO_BP_m1GO:20006E negative re  | 1/2606   | 4/23843   | 0.370616 | 0.663168 | 0.630601 | Osr1          |
| GO_BP_m1GO:20008E regulation   | 1/2606   | 4/23843   | 0.370616 | 0.663168 | 0.630601 | Tac1          |
| GO_BP_m1GO:200101 epithelial c | 1/2606   | 4/23843   | 0.370616 | 0.663168 | 0.630601 | Lgr4          |
| GO_BP_m1GO:20010E negative re  | 1/2606   | 4/23843   | 0.370616 | 0.663168 | 0.630601 | Nudt16l1      |
| GO_BP_m1GO:20012C positive re  | 1/2606   | 4/23843   | 0.370616 | 0.663168 | 0.630601 | Tnfsf11       |
| GO_BP_m1GO:000691 autophagy    | 43/2606  | 372/23843 | 0.371699 | 0.664463 | 0.631832 | 3110002H1     |
| GO_BP_m1GO:006191 process uti  | 43/2606  | 372/23843 | 0.371699 | 0.664463 | 0.631832 | 3110002H1     |
| GO_BP_m1GO:00072E tyrosine ph  | 9/2606   | 71/23843  | 0.371793 | 0.664463 | 0.631832 | Cav1/Hdac     |
| GO_BP_m1GO:00346E cellular car | 9/2606   | 71/23843  | 0.371793 | 0.664463 | 0.631832 | B3gnt3/B3gnt3 |
| GO_BP_m1GO:19018E negative re  | 9/2606   | 71/23843  | 0.371793 | 0.664463 | 0.631832 | Cav3/Ephb     |
| GO_BP_m1GO:19033E negative re  | 9/2606   | 71/23843  | 0.371793 | 0.664463 | 0.631832 | Anxa2/N4k     |
| GO_BP_m1GO:00512C release of   | ε13/2606 | 106/23843 | 0.373684 | 0.666581 | 0.633846 | Akap6/Asp     |
| GO_BP_m1GO:00512E negative re  | 13/2606  | 106/23843 | 0.373684 | 0.666581 | 0.633846 | Akap6/Asp     |
| GO_BP_m1GO:00072E Ras proteir  | 49/2606  | 426/23843 | 0.373888 | 0.666581 | 0.633846 | Aatk/Abi2/    |
| GO_BP_m1GO:00027C regulation   | 18/2606  | 150/23843 | 0.374142 | 0.666581 | 0.633846 | Aplf/Arg1/    |
| GO_BP_m1GO:000194 lymphangir   | 3/2606   | 20/23843  | 0.376228 | 0.666581 | 0.633846 | Epha2/Foxo    |
| GO_BP_m1GO:00025C antigen prc  | 3/2606   | 20/23843  | 0.376228 | 0.666581 | 0.633846 | H2-DMb2/      |
| GO_BP_m1GO:00065E melanin m    | 3/2606   | 20/23843  | 0.376228 | 0.666581 | 0.633846 | Dct/Ddt/Ty    |
| GO_BP_m1GO:00068E cellular soc | 3/2606   | 20/23843  | 0.376228 | 0.666581 | 0.633846 | Atp1b2/C7     |
| GO_BP_m1GO:00070E vacuolar ac  | 3/2606   | 20/23843  | 0.376228 | 0.666581 | 0.633846 | Atp6v0c/Pf    |
| GO_BP_m1GO:00083E asymmetric   | 3/2606   | 20/23843  | 0.376228 | 0.666581 | 0.633846 | Dock7/Fgf     |
| GO_BP_m1GO:001064 regulation   | 3/2606   | 20/23843  | 0.376228 | 0.666581 | 0.633846 | Ndr4/Ptp      |
| GO_BP_m1GO:001087 regulation   | 3/2606   | 20/23843  | 0.376228 | 0.666581 | 0.633846 | Abca12/Nr     |
| GO_BP_m1GO:00148C release of   | ε3/2606  | 20/23843  | 0.376228 | 0.666581 | 0.633846 | Dhrs7c/Fkl    |
| GO_BP_m1GO:00161E glycoside r  | 3/2606   | 20/23843  | 0.376228 | 0.666581 | 0.633846 | Abhd10/Al     |
| GO_BP_m1GO:00312E positive re  | 3/2606   | 20/23843  | 0.376228 | 0.666581 | 0.633846 | Calcr/Guca    |
| GO_BP_m1GO:003214 activation   | 3/2606   | 20/23843  | 0.376228 | 0.666581 | 0.633846 | Fgf1/Itgbl1   |
| GO_BP_m1GO:00338E nucleoside   | 3/2606   | 20/23843  | 0.376228 | 0.666581 | 0.633846 | Crot/Dcacc    |
| GO_BP_m1GO:003387 ribonucleo   | 3/2606   | 20/23843  | 0.376228 | 0.666581 | 0.633846 | Crot/Dcacc    |
| GO_BP_m1GO:00340E purine nuc   | 3/2606   | 20/23843  | 0.376228 | 0.666581 | 0.633846 | Crot/Dcacc    |
| GO_BP_m1GO:00353E thioester b  | 3/2606   | 20/23843  | 0.376228 | 0.666581 | 0.633846 | Mpc2/Pdhl     |
| GO_BP_m1GO:00363E dendritic c  | 3/2606   | 20/23843  | 0.376228 | 0.666581 | 0.633846 | Calr/Dock8    |
| GO_BP_m1GO:004244 progester    | 3/2606   | 20/23843  | 0.376228 | 0.666581 | 0.633846 | Akr1c12/D     |
| GO_BP_m1GO:00457E negative re  | 3/2606   | 20/23843  | 0.376228 | 0.666581 | 0.633846 | Fbxo18/Nu     |
| GO_BP_m1GO:00459E negative re  | 3/2606   | 20/23843  | 0.376228 | 0.666581 | 0.633846 | Adora1/Dc     |
| GO_BP_m1GO:00504E positive re  | 3/2606   | 20/23843  | 0.376228 | 0.666581 | 0.633846 | Nucks1/Tai    |
| GO_BP_m1GO:00511E positive re  | 3/2606   | 20/23843  | 0.376228 | 0.666581 | 0.633846 | Esrrb/Myc/    |
| GO_BP_m1GO:005134 positive re  | 3/2606   | 20/23843  | 0.376228 | 0.666581 | 0.633846 | Calcr/Guca    |

|                                      |           |          |          |          |              |
|--------------------------------------|-----------|----------|----------|----------|--------------|
| GO_BP_m1GO:006008inhibitory p3/2606  | 20/23843  | 0.376228 | 0.666581 | 0.633846 | Abat/Nlgn1   |
| GO_BP_m1GO:006033interferon- 3/2606  | 20/23843  | 0.376228 | 0.666581 | 0.633846 | Arg1/Ifng/I  |
| GO_BP_m1GO:006116establishm3/2606    | 20/23843  | 0.376228 | 0.666581 | 0.633846 | Fscn1/Gbf1   |
| GO_BP_m1GO:007026pyroptosis 3/2606   | 20/23843  | 0.376228 | 0.666581 | 0.633846 | Apip/Gsdr    |
| GO_BP_m1GO:007049interleukin-3/2606  | 20/23843  | 0.376228 | 0.666581 | 0.633846 | Il1rn/Irak2/ |
| GO_BP_m1GO:007115negative re3/2606   | 20/23843  | 0.376228 | 0.666581 | 0.633846 | Calr/Rpl23/  |
| GO_BP_m1GO:007161acyl-CoA t3/2606    | 20/23843  | 0.376228 | 0.666581 | 0.633846 | Mpc2/Pdhf    |
| GO_BP_m1GO:007169ectoderma 3/2606    | 20/23843  | 0.376228 | 0.666581 | 0.633846 | Hdac1/Hda    |
| GO_BP_m1GO:007208renal vesicl3/2606  | 20/23843  | 0.376228 | 0.666581 | 0.633846 | Gdnf/Osr1/   |
| GO_BP_m1GO:007217metaneph3/2606      | 20/23843  | 0.376228 | 0.666581 | 0.633846 | Lgr4/Osr1/   |
| GO_BP_m1GO:009038phagosom3/2606      | 20/23843  | 0.376228 | 0.666581 | 0.633846 | Rab32/Rab    |
| GO_BP_m1GO:190167regulation 3/2606   | 20/23843  | 0.376228 | 0.666581 | 0.633846 | Chmp1b/H     |
| GO_BP_m1GO:003260interferon- 14/2606 | 115/23843 | 0.376642 | 0.666581 | 0.633846 | Abl2/Fam4    |
| GO_BP_m1GO:002167nerve deve10/2606   | 80/23843  | 0.376646 | 0.666581 | 0.633846 | Ahnak2/Atf   |
| GO_BP_m1GO:002290respiratory 10/2606 | 80/23843  | 0.376646 | 0.666581 | 0.633846 | Cdk1/Coq9    |
| GO_BP_m1GO:004472DNA meth10/2606     | 80/23843  | 0.376646 | 0.666581 | 0.633846 | Apobec1/C    |
| GO_BP_m1GO:009866inorganic a10/2606  | 80/23843  | 0.376646 | 0.666581 | 0.633846 | Ank/Ano1/    |
| GO_BP_m1GO:000674glutathione7/2606   | 54/23843  | 0.376819 | 0.666581 | 0.633846 | Gclm/Gpx1    |
| GO_BP_m1GO:002179cerebral co7/2606   | 54/23843  | 0.376819 | 0.666581 | 0.633846 | Arx/Cdk5/F   |
| GO_BP_m1GO:003049maturation7/2606    | 54/23843  | 0.376819 | 0.666581 | 0.633846 | Bms1/Kri1/   |
| GO_BP_m1GO:003261interleukin-7/2606  | 54/23843  | 0.376819 | 0.666581 | 0.633846 | Cd36/Ifng/   |
| GO_BP_m1GO:004671viral entry i7/2606 | 54/23843  | 0.376819 | 0.666581 | 0.633846 | Cav1/Gsn/I   |
| GO_BP_m1GO:190390positive re7/2606   | 54/23843  | 0.376819 | 0.666581 | 0.633846 | Fkbp6/Fmr    |
| GO_BP_m1GO:000703vacuolar tr15/2606  | 124/23843 | 0.379214 | 0.666581 | 0.633846 | Ankfy1/Cac   |
| GO_BP_m1GO:007133cellular res15/2606 | 124/23843 | 0.379214 | 0.666581 | 0.633846 | Ano1/Fkbp    |
| GO_BP_m1GO:001076regulation 5/2606   | 37/23843  | 0.380052 | 0.666581 | 0.633846 | Acta2/D1Ei   |
| GO_BP_m1GO:001623telomere c5/2606    | 37/23843  | 0.380052 | 0.666581 | 0.633846 | Dclre1a/Na   |
| GO_BP_m1GO:002195central ner5/2606   | 37/23843  | 0.380052 | 0.666581 | 0.633846 | Ephb1/Eph    |
| GO_BP_m1GO:003302myeloid ce5/2606    | 37/23843  | 0.380052 | 0.666581 | 0.633846 | Hcar2/Ifng,  |
| GO_BP_m1GO:003313regulation 5/2606   | 37/23843  | 0.380052 | 0.666581 | 0.633846 | Gm13271/I    |
| GO_BP_m1GO:005070interleukin-5/2606  | 37/23843  | 0.380052 | 0.666581 | 0.633846 | Cd36/Gsdr    |
| GO_BP_m1GO:009004regulation 5/2606   | 37/23843  | 0.380052 | 0.666581 | 0.633846 | Cib1/Dll4/I  |
| GO_BP_m1GO:190367positive re5/2606   | 37/23843  | 0.380052 | 0.666581 | 0.633846 | Cib1/Fgf1/   |
| GO_BP_m1GO:200082regulation 5/2606   | 37/23843  | 0.380052 | 0.666581 | 0.633846 | Foxc1/Nog    |
| GO_BP_m1GO:000330cardiac mu11/2606   | 89/23843  | 0.380656 | 0.666581 | 0.633846 | Adk/Akap6    |
| GO_BP_m1GO:004001regulation 11/2606  | 89/23843  | 0.380656 | 0.666581 | 0.633846 | Bbs2/Drd3,   |
| GO_BP_m1GO:003262interleukin-8/2606  | 63/23843  | 0.383046 | 0.666581 | 0.633846 | Abl2/Btnl2,  |
| GO_BP_m1GO:004800antigen prc8/2606   | 63/23843  | 0.383046 | 0.666581 | 0.633846 | Calr/Gm11    |
| GO_BP_m1GO:004801phosphatic17/2606   | 142/23843 | 0.383453 | 0.666581 | 0.633846 | Csf3/Dcn/E   |
| GO_BP_m1GO:000027M phase 2/2606      | 12/23843  | 0.383527 | 0.666581 | 0.633846 | Cdc20/Top    |
| GO_BP_m1GO:000184neural plat2/2606   | 12/23843  | 0.383527 | 0.666581 | 0.633846 | Nog/Zfp56    |
| GO_BP_m1GO:000232pro-B cell r2/2606  | 12/23843  | 0.383527 | 0.666581 | 0.633846 | Flcn/Prkdc   |
| GO_BP_m1GO:000292regulation 2/2606   | 12/23843  | 0.383527 | 0.666581 | 0.633846 | Ptpcr/Susd   |
| GO_BP_m1GO:000309regulation 2/2606   | 12/23843  | 0.383527 | 0.666581 | 0.633846 | Adora1/Ut    |
| GO_BP_m1GO:000315endocardit2/2606    | 12/23843  | 0.383527 | 0.666581 | 0.633846 | Sox18/Stk3   |
| GO_BP_m1GO:000318mitral valve2/2606  | 12/23843  | 0.383527 | 0.666581 | 0.633846 | Smad6/Zfp    |
| GO_BP_m1GO:000333mesenchyr2/2606     | 12/23843  | 0.383527 | 0.666581 | 0.633846 | Gdnf/Smo     |
| GO_BP_m1GO:000335regulation 2/2606   | 12/23843  | 0.383527 | 0.666581 | 0.633846 | Bbs2/Dnaa    |



|          |           |              |        |          |          |          |          |              |
|----------|-----------|--------------|--------|----------|----------|----------|----------|--------------|
| GO_BP_m1 | GO:000604 | UDP-N-ac     | 2/2606 | 12/23843 | 0.383527 | 0.666581 | 0.633846 | Gfpt2/Pgm    |
| GO_BP_m1 | GO:000607 | glycerol-3-  | 2/2606 | 12/23843 | 0.383527 | 0.666581 | 0.633846 | Gk2/Gpam     |
| GO_BP_m1 | GO:000608 | acetyl-CoA   | 2/2606 | 12/23843 | 0.383527 | 0.666581 | 0.633846 | Mpc2/Pdhf    |
| GO_BP_m1 | GO:000862 | granzyme-    | 2/2606 | 12/23843 | 0.383527 | 0.666581 | 0.633846 | Bnip3/Ube    |
| GO_BP_m1 | GO:000907 | serine fami  | 2/2606 | 12/23843 | 0.383527 | 0.666581 | 0.633846 | Gldc/Shmt    |
| GO_BP_m1 | GO:000926 | deoxyribor   | 2/2606 | 12/23843 | 0.383527 | 0.666581 | 0.633846 | Dera/Nudt    |
| GO_BP_m1 | GO:001482 | tonic smoc   | 2/2606 | 12/23843 | 0.383527 | 0.666581 | 0.633846 | Bbs2/Smpc    |
| GO_BP_m1 | GO:001962 | urea metak   | 2/2606 | 12/23843 | 0.383527 | 0.666581 | 0.633846 | Arg1/Otc     |
| GO_BP_m1 | GO:002156 | facial nerve | 2/2606 | 12/23843 | 0.383527 | 0.666581 | 0.633846 | Hoxb1/Sen    |
| GO_BP_m1 | GO:002161 | facial nerve | 2/2606 | 12/23843 | 0.383527 | 0.666581 | 0.633846 | Hoxb1/Sen    |
| GO_BP_m1 | GO:003063 | polyketide   | 2/2606 | 12/23843 | 0.383527 | 0.666581 | 0.633846 | Akr1c12/Ct   |
| GO_BP_m1 | GO:003064 | aminoglycc   | 2/2606 | 12/23843 | 0.383527 | 0.666581 | 0.633846 | Akr1c12/Ct   |
| GO_BP_m1 | GO:003112 | rRNA 3'-er   | 2/2606 | 12/23843 | 0.383527 | 0.666581 | 0.633846 | Eri1/Exosc9  |
| GO_BP_m1 | GO:003230 | positive re  | 2/2606 | 12/23843 | 0.383527 | 0.666581 | 0.633846 | P2ry2/Tnfs   |
| GO_BP_m1 | GO:003327 | actin-myos   | 2/2606 | 12/23843 | 0.383527 | 0.666581 | 0.633846 | Myh7/Mylk    |
| GO_BP_m1 | GO:003535 | regulation   | 2/2606 | 12/23843 | 0.383527 | 0.666581 | 0.633846 | Asxl1/Plin5  |
| GO_BP_m1 | GO:003546 | vitamin tra  | 2/2606 | 12/23843 | 0.383527 | 0.666581 | 0.633846 | Scarb1/Slc   |
| GO_BP_m1 | GO:003575 | regulation   | 2/2606 | 12/23843 | 0.383527 | 0.666581 | 0.633846 | Atp6v0c/Pf   |
| GO_BP_m1 | GO:003579 | platelet-de  | 2/2606 | 12/23843 | 0.383527 | 0.666581 | 0.633846 | Pdgfa/Ptpr   |
| GO_BP_m1 | GO:003581 | positive re  | 2/2606 | 12/23843 | 0.383527 | 0.666581 | 0.633846 | Ednrb/Opr    |
| GO_BP_m1 | GO:004254 | hemoglobi    | 2/2606 | 12/23843 | 0.383527 | 0.666581 | 0.633846 | Eif2ak1/Prr  |
| GO_BP_m1 | GO:004275 | long-chain   | 2/2606 | 12/23843 | 0.383527 | 0.666581 | 0.633846 | Alox12/Asa   |
| GO_BP_m1 | GO:004298 | sequesterir  | 2/2606 | 12/23843 | 0.383527 | 0.666581 | 0.633846 | Gsn/Tmsb1    |
| GO_BP_m1 | GO:004459 | daunorubic   | 2/2606 | 12/23843 | 0.383527 | 0.666581 | 0.633846 | Akr1c12/Ct   |
| GO_BP_m1 | GO:004459 | doxorubicii  | 2/2606 | 12/23843 | 0.383527 | 0.666581 | 0.633846 | Akr1c12/Ct   |
| GO_BP_m1 | GO:004534 | regulation   | 2/2606 | 12/23843 | 0.383527 | 0.666581 | 0.633846 | lfng/Il10    |
| GO_BP_m1 | GO:004576 | positive re  | 2/2606 | 12/23843 | 0.383527 | 0.666581 | 0.633846 | Calcr/Nf1    |
| GO_BP_m1 | GO:004582 | negative re  | 2/2606 | 12/23843 | 0.383527 | 0.666581 | 0.633846 | Ppargc1a/1   |
| GO_BP_m1 | GO:004594 | positive re  | 2/2606 | 12/23843 | 0.383527 | 0.666581 | 0.633846 | Foxa2/Ice1   |
| GO_BP_m1 | GO:004595 | negative re  | 2/2606 | 12/23843 | 0.383527 | 0.666581 | 0.633846 | Fmr1/Trim9   |
| GO_BP_m1 | GO:004857 | notochord    | 2/2606 | 12/23843 | 0.383527 | 0.666581 | 0.633846 | Epha2/Nog    |
| GO_BP_m1 | GO:006003 | anatomical   | 2/2606 | 12/23843 | 0.383527 | 0.666581 | 0.633846 | Amh/Cd24     |
| GO_BP_m1 | GO:006010 | positive re  | 2/2606 | 12/23843 | 0.383527 | 0.666581 | 0.633846 | Cd36/Ncka    |
| GO_BP_m1 | GO:006012 | positive re  | 2/2606 | 12/23843 | 0.383527 | 0.666581 | 0.633846 | Arhgef7/Se   |
| GO_BP_m1 | GO:007044 | oligodendr   | 2/2606 | 12/23843 | 0.383527 | 0.666581 | 0.633846 | Cdh2/Nog     |
| GO_BP_m1 | GO:007044 | regulation   | 2/2606 | 12/23843 | 0.383527 | 0.666581 | 0.633846 | Cdh2/Nog     |
| GO_BP_m1 | GO:007047 | uterine sm   | 2/2606 | 12/23843 | 0.383527 | 0.666581 | 0.633846 | Abat/Tacr2   |
| GO_BP_m1 | GO:007098 | left/right a | 2/2606 | 12/23843 | 0.383527 | 0.666581 | 0.633846 | lft172/Smc   |
| GO_BP_m1 | GO:007211 | glomerular   | 2/2606 | 12/23843 | 0.383527 | 0.666581 | 0.633846 | lfng/Wt1     |
| GO_BP_m1 | GO:007217 | nephric du   | 2/2606 | 12/23843 | 0.383527 | 0.666581 | 0.633846 | Epha7/Osr    |
| GO_BP_m1 | GO:007243 | signal tran  | 2/2606 | 12/23843 | 0.383527 | 0.666581 | 0.633846 | Cdkn1a/Prl   |
| GO_BP_m1 | GO:009019 | positive re  | 2/2606 | 12/23843 | 0.383527 | 0.666581 | 0.633846 | Il1r11/Pycar |
| GO_BP_m1 | GO:009732 | response tr  | 2/2606 | 12/23843 | 0.383527 | 0.666581 | 0.633846 | Blm/Fmr1     |
| GO_BP_m1 | GO:009876 | meiotic cel  | 2/2606 | 12/23843 | 0.383527 | 0.666581 | 0.633846 | Topaz1/Ttk   |
| GO_BP_m1 | GO:009876 | meiosis I c  | 2/2606 | 12/23843 | 0.383527 | 0.666581 | 0.633846 | Topaz1/Ttk   |
| GO_BP_m1 | GO:009896 | neurotrans   | 2/2606 | 12/23843 | 0.383527 | 0.666581 | 0.633846 | Arhgap44/    |
| GO_BP_m1 | GO:190120 | regulation   | 2/2606 | 12/23843 | 0.383527 | 0.666581 | 0.633846 | Antxr1/Has   |
| GO_BP_m1 | GO:190120 | regulation   | 2/2606 | 12/23843 | 0.383527 | 0.666581 | 0.633846 | Endog/Hsp    |

|                                        |           |          |          |          |             |
|----------------------------------------|-----------|----------|----------|----------|-------------|
| GO_BP_m1GO:19024Cintracellula 2/2606   | 12/23843  | 0.383527 | 0.666581 | 0.633846 | Cdkn1a/Prl  |
| GO_BP_m1GO:190257protein loc 2/2606    | 12/23843  | 0.383527 | 0.666581 | 0.633846 | Nmd3/Rpf    |
| GO_BP_m1GO:190271positive reç 2/2606   | 12/23843  | 0.383527 | 0.666581 | 0.633846 | Abl2/Ptpn2  |
| GO_BP_m1GO:190295regulation 2/2606     | 12/23843  | 0.383527 | 0.666581 | 0.633846 | Cfl1/Grin2k |
| GO_BP_m1GO:190302regulation 2/2606     | 12/23843  | 0.383527 | 0.666581 | 0.633846 | Ddrgk1/Zfp  |
| GO_BP_m1GO:190354establishmı 2/2606    | 12/23843  | 0.383527 | 0.666581 | 0.633846 | Arhgap44/   |
| GO_BP_m1GO:190396positive reç 2/2606   | 12/23843  | 0.383527 | 0.666581 | 0.633846 | Abcb1a/Fx   |
| GO_BP_m1GO:190397regulation 2/2606     | 12/23843  | 0.383527 | 0.666581 | 0.633846 | Gpr183/Idf  |
| GO_BP_m1GO:190429positive reç 2/2606   | 12/23843  | 0.383527 | 0.666581 | 0.633846 | Bcap31/Tr   |
| GO_BP_m1GO:190447regulation 2/2606     | 12/23843  | 0.383527 | 0.666581 | 0.633846 | Abcb1a/Dç   |
| GO_BP_m1GO:190486excitatory ε 2/2606   | 12/23843  | 0.383527 | 0.666581 | 0.633846 | Nptn/Wnt7   |
| GO_BP_m1GO:190515positive reç 2/2606   | 12/23843  | 0.383527 | 0.666581 | 0.633846 | Cd36/Ncka   |
| GO_BP_m1GO:190521regulation 2/2606     | 12/23843  | 0.383527 | 0.666581 | 0.633846 | Fmr1/Nuck   |
| GO_BP_m1GO:200067regulation 2/2606     | 12/23843  | 0.383527 | 0.666581 | 0.633846 | Hdac1/Spc   |
| GO_BP_m1GO:200083positive reç 2/2606   | 12/23843  | 0.383527 | 0.666581 | 0.633846 | Galr1/Tac1  |
| GO_BP_m1GO:200105negative re 2/2606    | 12/23843  | 0.383527 | 0.666581 | 0.633846 | Tbx1/Wt1    |
| GO_BP_m1GO:00091Cglycoprote 37/2606    | 320/23843 | 0.383606 | 0.666586 | 0.633851 | A4gnt/Alg6  |
| GO_BP_m1GO:004513developme 25/2606     | 213/23843 | 0.383978 | 0.666909 | 0.634158 | Ccdc182/A   |
| GO_BP_m1GO:004215lipoprotein 12/2606   | 98/23843  | 0.384019 | 0.666909 | 0.634158 | Apobec1/A   |
| GO_BP_m1GO:005265cyclic purin 12/2606  | 98/23843  | 0.384019 | 0.666909 | 0.634158 | Adcy4/Adr   |
| GO_BP_m1GO:003476positive reç 18/2606  | 151/23843 | 0.385212 | 0.668717 | 0.635877 | Abcb1a/Ak   |
| GO_BP_m1GO:004666male sex di 18/2606   | 151/23843 | 0.385212 | 0.668717 | 0.635877 | Amh/Asb1    |
| GO_BP_m1GO:004275regulation 13/2606    | 107/23843 | 0.386875 | 0.671338 | 0.638369 | Adora1/Ar   |
| GO_BP_m1GO:004881regulation 13/2606    | 107/23843 | 0.386875 | 0.671338 | 0.638369 | Ache/Arhg   |
| GO_BP_m1GO:001485striated m 9/2606     | 72/23843  | 0.387944 | 0.672793 | 0.639753 | Cdk1/Ephb   |
| GO_BP_m1GO:00308Cregulation 9/2606     | 72/23843  | 0.387944 | 0.672793 | 0.639753 | Adra1d/Ak   |
| GO_BP_m1GO:004244hormone b 9/2606      | 72/23843  | 0.387944 | 0.672793 | 0.639753 | Dgkq/Dio2   |
| GO_BP_m1GO:000703endosome 6/2606       | 46/23843  | 0.388984 | 0.673932 | 0.640836 | Dnajc13/Pa  |
| GO_BP_m1GO:003513forelimb m 6/2606     | 46/23843  | 0.388984 | 0.673932 | 0.640836 | Alx3/Hoxd   |
| GO_BP_m1GO:004542positive reç 6/2606   | 46/23843  | 0.388984 | 0.673932 | 0.640836 | Cd36/Ifng/  |
| GO_BP_m1GO:006004regulation 6/2606     | 46/23843  | 0.388984 | 0.673932 | 0.640836 | Cdk1/Hdac   |
| GO_BP_m1GO:19044Cpositive reç 6/2606   | 46/23843  | 0.388984 | 0.673932 | 0.640836 | Cd36/Ifng/  |
| GO_BP_m1GO:00421CB cell prolif 14/2606 | 116/23843 | 0.389325 | 0.674389 | 0.641271 | Cdkn1a/Ctl  |
| GO_BP_m1GO:003227positive reç 15/2606  | 125/23843 | 0.391443 | 0.67764  | 0.644362 | Ankrd53/C   |
| GO_BP_m1GO:001715regulation 23/2606    | 196/23843 | 0.391572 | 0.67764  | 0.644362 | Bcr/Catspe  |
| GO_BP_m1GO:000193positive reç 10/2606  | 81/23843  | 0.391891 | 0.67764  | 0.644362 | Arg1/Cav1   |
| GO_BP_m1GO:00322Cregulation 10/2606    | 81/23843  | 0.391891 | 0.67764  | 0.644362 | Atr/Cct3/H  |
| GO_BP_m1GO:004866neuron fat 10/2606    | 81/23843  | 0.391891 | 0.67764  | 0.644362 | Dbx1/Dll4/  |
| GO_BP_m1GO:00011Cresponse tr 40/2606   | 348/23843 | 0.392119 | 0.67764  | 0.644362 | Abl2/Adh1   |
| GO_BP_m1GO:000177microglial c 4/2606   | 29/23843  | 0.392744 | 0.67764  | 0.644362 | Fpr2/Itgam  |
| GO_BP_m1GO:000195endochonc 4/2606      | 29/23843  | 0.392744 | 0.67764  | 0.644362 | Alpl/Csgalr |
| GO_BP_m1GO:000209positive reç 4/2606   | 29/23843  | 0.392744 | 0.67764  | 0.644362 | Cd63/Fmr1   |
| GO_BP_m1GO:000269regulation 4/2606     | 29/23843  | 0.392744 | 0.67764  | 0.644362 | Adam8/Bcr   |
| GO_BP_m1GO:00033Ctype B pan 4/2606     | 29/23843  | 0.392744 | 0.67764  | 0.644362 | Arntl/Clock |
| GO_BP_m1GO:000682zinc ion tra 4/2606   | 29/23843  | 0.392744 | 0.67764  | 0.644362 | Mt3/Slc30a  |
| GO_BP_m1GO:003326nuclear DN 4/2606     | 29/23843  | 0.392744 | 0.67764  | 0.644362 | Cdc7/Dach   |
| GO_BP_m1GO:00353Cnegative re 4/2606    | 29/23843  | 0.392744 | 0.67764  | 0.644362 | Fkbp1b/Ma   |
| GO_BP_m1GO:003607replacemer 4/2606     | 29/23843  | 0.392744 | 0.67764  | 0.644362 | Alpl/Csgalr |

|                   |                     |           |          |          |          |              |
|-------------------|---------------------|-----------|----------|----------|----------|--------------|
| GO_BP_m1GO:004567 | positive reç4/2606  | 29/23843  | 0.392744 | 0.67764  | 0.644362 | Ccr1/Ifng/I  |
| GO_BP_m1GO:004595 | positive reç4/2606  | 29/23843  | 0.392744 | 0.67764  | 0.644362 | Cadm1/Il12   |
| GO_BP_m1GO:004864 | positive reç4/2606  | 29/23843  | 0.392744 | 0.67764  | 0.644362 | Arntl/Rps6l  |
| GO_BP_m1GO:200051 | positive reç4/2606  | 29/23843  | 0.392744 | 0.67764  | 0.644362 | Ifng/Il2rg/I |
| GO_BP_m1GO:200101 | regulation 4/2606   | 29/23843  | 0.392744 | 0.67764  | 0.644362 | Arntl/Ephb   |
| GO_BP_m1GO:004247 | ear morpho16/2606   | 134/23843 | 0.393287 | 0.678444 | 0.645126 | Aldh1a3/Bc   |
| GO_BP_m1GO:001003 | response tr27/2606  | 232/23843 | 0.394747 | 0.680288 | 0.64688  | Abat/Aoc1.   |
| GO_BP_m1GO:003032 | embryonic 17/2606   | 143/23843 | 0.394903 | 0.680288 | 0.64688  | Alx3/B9d1/   |
| GO_BP_m1GO:003511 | embryonic 17/2606   | 143/23843 | 0.394903 | 0.680288 | 0.64688  | Alx3/B9d1/   |
| GO_BP_m1GO:005095 | sensory pe 17/2606  | 143/23843 | 0.394903 | 0.680288 | 0.64688  | Bbs2/Cacnl   |
| GO_BP_m1GO:000202 | regulation 11/2606  | 90/23843  | 0.395133 | 0.680288 | 0.64688  | Adm/Avpr.    |
| GO_BP_m1GO:004668 | response tr11/2606  | 90/23843  | 0.395133 | 0.680288 | 0.64688  | Akap6/Asp    |
| GO_BP_m1GO:001580 | L-amino ac7/2606    | 55/23843  | 0.39544  | 0.680288 | 0.64688  | Arg1/Arl6ip  |
| GO_BP_m1GO:004362 | regulation 7/2606   | 55/23843  | 0.39544  | 0.680288 | 0.64688  | Atf3/Bclaf1  |
| GO_BP_m1GO:004853 | thymus dev7/2606    | 55/23843  | 0.39544  | 0.680288 | 0.64688  | Asxl1/Ephb   |
| GO_BP_m1GO:006035 | endochonc7/2606     | 55/23843  | 0.39544  | 0.680288 | 0.64688  | Alpl/Csgalr  |
| GO_BP_m1GO:006197 | replacemer7/2606    | 55/23843  | 0.39544  | 0.680288 | 0.64688  | Alpl/Csgalr  |
| GO_BP_m1GO:009890 | regulation 7/2606   | 55/23843  | 0.39544  | 0.680288 | 0.64688  | Cav1/Cav3.   |
| GO_BP_m1GO:190307 | positive reç7/2606  | 55/23843  | 0.39544  | 0.680288 | 0.64688  | Cib1/Epha2   |
| GO_BP_m1GO:200077 | regulation 7/2606   | 55/23843  | 0.39544  | 0.680288 | 0.64688  | Blm/Dek/Fl   |
| GO_BP_m1GO:000926 | cellular res18/2606 | 152/23843 | 0.396324 | 0.681675 | 0.648199 | Aoc1/Atf3/   |
| GO_BP_m1GO:001620 | regulation 19/2606  | 161/23843 | 0.397581 | 0.683702 | 0.650126 | Akap6/Arn    |
| GO_BP_m1GO:190180 | positive reç12/2606 | 99/23843  | 0.397833 | 0.684002 | 0.650412 | Arih2/Bcap   |
| GO_BP_m1GO:200027 | regulation 13/2606  | 108/23843 | 0.40011  | 0.68774  | 0.653966 | Ankrd1/Atr   |
| GO_BP_m1GO:000694 | syncytium 8/2606    | 64/23843  | 0.400321 | 0.68774  | 0.653966 | Adam8/Car    |
| GO_BP_m1GO:003261 | interleukin 8/2606  | 64/23843  | 0.400321 | 0.68774  | 0.653966 | 5730559C1    |
| GO_BP_m1GO:004333 | response tr8/2606   | 64/23843  | 0.400321 | 0.68774  | 0.653966 | Cav1/Ddx2    |
| GO_BP_m1GO:007124 | cellular res22/2606 | 188/23843 | 0.400567 | 0.688029 | 0.654241 | Aoc1/Asph    |
| GO_BP_m1GO:003526 | multicellul24/2606  | 206/23843 | 0.402058 | 0.690288 | 0.656389 | Abl2/Bbs2/   |
| GO_BP_m1GO:000057 | embryonic 5/2606    | 38/23843  | 0.402668 | 0.690288 | 0.656389 | Foxa2/Sma    |
| GO_BP_m1GO:000272 | positive reç5/2606  | 38/23843  | 0.402668 | 0.690288 | 0.656389 | Cd36/Gprc    |
| GO_BP_m1GO:004478 | cell cycle D5/2606  | 38/23843  | 0.402668 | 0.690288 | 0.656389 | Cdc7/Dach    |
| GO_BP_m1GO:004688 | regulation 5/2606   | 38/23843  | 0.402668 | 0.690288 | 0.656389 | Dgkq/Ifng/   |
| GO_BP_m1GO:007235 | tricarboxyli5/2606  | 38/23843  | 0.402668 | 0.690288 | 0.656389 | Idh2/Idh3a   |
| GO_BP_m1GO:190595 | negative re5/2606   | 38/23843  | 0.402668 | 0.690288 | 0.656389 | Igfbp3/Nr1   |
| GO_BP_m1GO:200000 | regulation 5/2606   | 38/23843  | 0.402668 | 0.690288 | 0.656389 | Abca12/Cd    |
| GO_BP_m1GO:200027 | negative re5/2606   | 38/23843  | 0.402668 | 0.690288 | 0.656389 | Ankrd1/Da    |
| GO_BP_m1GO:200102 | positive reç5/2606  | 38/23843  | 0.402668 | 0.690288 | 0.656389 | Abcb1a/En    |
| GO_BP_m1GO:003017 | positive reç15/2606 | 126/23843 | 0.403709 | 0.691802 | 0.657829 | Abl2/Arntl/  |
| GO_BP_m1GO:007133 | cellular res15/2606 | 126/23843 | 0.403709 | 0.691802 | 0.657829 | Ano1/Fkbp    |
| GO_BP_m1GO:000191 | regulation 9/2606   | 73/23843  | 0.404128 | 0.692115 | 0.658127 | Arg1/Cadn    |
| GO_BP_m1GO:004632 | regulation 9/2606   | 73/23843  | 0.404128 | 0.692115 | 0.658127 | Adipor2/Ap   |
| GO_BP_m1GO:190137 | regulation 9/2606   | 73/23843  | 0.404128 | 0.692115 | 0.658127 | Akap6/Atp    |
| GO_BP_m1GO:003021 | keratinocyt16/2606  | 135/23843 | 0.405143 | 0.693594 | 0.659533 | Abca12/Ce    |
| GO_BP_m1GO:009059 | sensory orç34/2606  | 296/23843 | 0.40603  | 0.693594 | 0.659533 | Aldh1a3/Bc   |
| GO_BP_m1GO:000690 | phagocyto36/2606    | 314/23843 | 0.406386 | 0.693594 | 0.659533 | Abl2/Anxa3   |
| GO_BP_m1GO:000332 | type B pan3/2606    | 21/23843  | 0.407129 | 0.693594 | 0.659533 | Arntl/Clock  |
| GO_BP_m1GO:001066 | epithelial s13/2606 | 21/23843  | 0.407129 | 0.693594 | 0.659533 | 5730559C1    |

|                                        |           |          |          |          |              |
|----------------------------------------|-----------|----------|----------|----------|--------------|
| GO_BP_m1GO:001932hexose cat:3/2606     | 21/23843  | 0.407129 | 0.693594 | 0.659533 | Ldha/Tigar.  |
| GO_BP_m1GO:003129retinal gan:3/2606    | 21/23843  | 0.407129 | 0.693594 | 0.659533 | Epha7/Eph    |
| GO_BP_m1GO:003411regulation 3/2606     | 21/23843  | 0.407129 | 0.693594 | 0.659533 | Gcnt2/Il10/  |
| GO_BP_m1GO:003437plasma lipc3/2606     | 21/23843  | 0.407129 | 0.693594 | 0.659533 | Dgat1/Mttq   |
| GO_BP_m1GO:003630lymph vess3/2606      | 21/23843  | 0.407129 | 0.693594 | 0.659533 | Epha2/Foxo   |
| GO_BP_m1GO:003969viral RNA c3/2606     | 21/23843  | 0.407129 | 0.693594 | 0.659533 | Fmr1/Rab5    |
| GO_BP_m1GO:004245purine nuc3/2606      | 21/23843  | 0.407129 | 0.693594 | 0.659533 | Adk/Aprt/A   |
| GO_BP_m1GO:004572positive re:3/2606    | 21/23843  | 0.407129 | 0.693594 | 0.659533 | Avpr1a/Nr:   |
| GO_BP_m1GO:004583positive re:3/2606    | 21/23843  | 0.407129 | 0.693594 | 0.659533 | Gria1/Myc/   |
| GO_BP_m1GO:004612purine ribo3/2606     | 21/23843  | 0.407129 | 0.693594 | 0.659533 | Adk/Aprt/A   |
| GO_BP_m1GO:004663negative re3/2606     | 21/23843  | 0.407129 | 0.693594 | 0.659533 | Jak3/Smad    |
| GO_BP_m1GO:004802positive re:3/2606    | 21/23843  | 0.407129 | 0.693594 | 0.659533 | Hmx2/Prdx    |
| GO_BP_m1GO:006133establishm:3/2606     | 21/23843  | 0.407129 | 0.693594 | 0.659533 | Fscn1/Gbf1   |
| GO_BP_m1GO:007086regulation 3/2606     | 21/23843  | 0.407129 | 0.693594 | 0.659533 | Bcap31/Sei   |
| GO_BP_m1GO:007264interferon-3/2606     | 21/23843  | 0.407129 | 0.693594 | 0.659533 | Abl2/Ptpn2   |
| GO_BP_m1GO:190351release of :3/2606    | 21/23843  | 0.407129 | 0.693594 | 0.659533 | Dhrs7c/Fkt   |
| GO_BP_m1GO:200048regulation 3/2606     | 21/23843  | 0.407129 | 0.693594 | 0.659533 | Hyal2/Ptpn   |
| GO_BP_m1GO:003294negative re10/2606    | 82/23843  | 0.407168 | 0.693594 | 0.659533 | Arg1/Cd80    |
| GO_BP_m1GO:005067negative re10/2606    | 82/23843  | 0.407168 | 0.693594 | 0.659533 | Arg1/Cd80    |
| GO_BP_m1GO:007233intrinsic ap 10/2606  | 82/23843  | 0.407168 | 0.693594 | 0.659533 | Bok/Cdkn1    |
| GO_BP_m1GO:005126protein tet:19/2606   | 162/23843 | 0.408414 | 0.693594 | 0.659533 | Ache/Acpp    |
| GO_BP_m1GO:190211regulation 20/2606    | 171/23843 | 0.409242 | 0.693594 | 0.659533 | Cav3/Chmq    |
| GO_BP_m1GO:004355regulation 6/2606     | 47/23843  | 0.409312 | 0.693594 | 0.659533 | Epha8/Fpr2   |
| GO_BP_m1GO:005197regulation 6/2606     | 47/23843  | 0.409312 | 0.693594 | 0.659533 | Hmbox1/Nv    |
| GO_BP_m1GO:003286cellular res:21/2606  | 180/23843 | 0.409968 | 0.693594 | 0.659533 | Appl1/Bcar   |
| GO_BP_m1GO:190290positive re:22/2606   | 189/23843 | 0.410605 | 0.693594 | 0.659533 | Ankrd53/C    |
| GO_BP_m1GO:003139positive re:12/2606   | 100/23843 | 0.411676 | 0.693594 | 0.659533 | 5730559C1    |
| GO_BP_m1GO:190000positive re:12/2606   | 100/23843 | 0.411676 | 0.693594 | 0.659533 | Ache/Capri   |
| GO_BP_m1GO:001050regulation 27/2606    | 234/23843 | 0.412783 | 0.693594 | 0.659533 | 3110002H1    |
| GO_BP_m1GO:000018activation c 13/2606  | 109/23843 | 0.413373 | 0.693594 | 0.659533 | 5730559C1    |
| GO_BP_m1GO:003011regulation 32/2606    | 279/23843 | 0.413837 | 0.693594 | 0.659533 | Abl2/Arntl/  |
| GO_BP_m1GO:007132cellular res:15/2606  | 127/23843 | 0.416001 | 0.693594 | 0.659533 | Ano1/Fkbp    |
| GO_BP_m1GO:004870embryonic 16/2606     | 136/23843 | 0.417023 | 0.693594 | 0.659533 | Alx3/Dscan   |
| GO_BP_m1GO:000256somatic div8/2606     | 65/23843  | 0.417598 | 0.693594 | 0.659533 | Aplf/Ifng/Il |
| GO_BP_m1GO:000314embryonic 8/2606      | 65/23843  | 0.417598 | 0.693594 | 0.659533 | Cfc1/Dnaa1   |
| GO_BP_m1GO:000651protein mo8/2606      | 65/23843  | 0.417598 | 0.693594 | 0.659533 | Cul1/Kdm2    |
| GO_BP_m1GO:001644somatic cel8/2606     | 65/23843  | 0.417598 | 0.693594 | 0.659533 | Aplf/Ifng/Il |
| GO_BP_m1GO:004801inositol lipi 17/2606 | 145/23843 | 0.417893 | 0.693594 | 0.659533 | Csf3/Dcn/E   |
| GO_BP_m1GO:000196startle resp4/2606    | 30/23843  | 0.41848  | 0.693594 | 0.659533 | Drd3/Grin2   |
| GO_BP_m1GO:000271positive re:4/2606    | 30/23843  | 0.41848  | 0.693594 | 0.659533 | Cadm1/Il1:   |
| GO_BP_m1GO:003259protein tra:4/2606    | 30/23843  | 0.41848  | 0.693594 | 0.659533 | Arhgap44/    |
| GO_BP_m1GO:004431wound hea4/2606       | 30/23843  | 0.41848  | 0.693594 | 0.659533 | Col5a1/Mn    |
| GO_BP_m1GO:004593negative re4/2606     | 30/23843  | 0.41848  | 0.693594 | 0.659533 | Adora1/Dc    |
| GO_BP_m1GO:005068positive re:4/2606    | 30/23843  | 0.41848  | 0.693594 | 0.659533 | Cpeb3/Hm     |
| GO_BP_m1GO:006184microtubul4/2606      | 30/23843  | 0.41848  | 0.693594 | 0.659533 | Ezr/Nubp1    |
| GO_BP_m1GO:009050epiboly inv4/2606     | 30/23843  | 0.41848  | 0.693594 | 0.659533 | Col5a1/Mn    |
| GO_BP_m1GO:190211positive re:4/2606    | 30/23843  | 0.41848  | 0.693594 | 0.659533 | Bnip3/Bok/   |
| GO_BP_m1GO:200014positive re:4/2606    | 30/23843  | 0.41848  | 0.693594 | 0.659533 | Bclaf1/Can   |

|                                      |         |           |          |          |          |            |
|--------------------------------------|---------|-----------|----------|----------|----------|------------|
| GO_BP_m1GO:004865smooth muscle       | 18/2606 | 154/23843 | 0.418636 | 0.693594 | 0.659533 | Alox12/Cav |
| GO_BP_m1GO:003052intracellular       | 23/2606 | 199/23843 | 0.420993 | 0.693594 | 0.659533 | 5730559C1  |
| GO_BP_m1GO:004873appendage           | 23/2606 | 199/23843 | 0.420993 | 0.693594 | 0.659533 | Alx3/Asph/ |
| GO_BP_m1GO:006017limb development    | 23/2606 | 199/23843 | 0.420993 | 0.693594 | 0.659533 | Alx3/Asph/ |
| GO_BP_m1GO:009027regulation          | 25/2606 | 217/23843 | 0.421497 | 0.693594 | 0.659533 | Abat/Ano1  |
| GO_BP_m1GO:190199regulation          | 29/2606 | 253/23843 | 0.42203  | 0.693594 | 0.659533 | Blm/Ccng1  |
| GO_BP_m1GO:003243positive regulation | 10/2606 | 83/23843  | 0.422454 | 0.693594 | 0.659533 | Arih2/Bcap |
| GO_BP_m1GO:003275positive regulation | 10/2606 | 83/23843  | 0.422454 | 0.693594 | 0.659533 | 5730559C1  |
| GO_BP_m1GO:004243mechanoreception    | 10/2606 | 83/23843  | 0.422454 | 0.693594 | 0.659533 | Atp8b1/Ctl |
| GO_BP_m1GO:000047endonucleolus       | 2/2606  | 13/23843  | 0.423668 | 0.693594 | 0.659533 | Bms1/Kri1  |
| GO_BP_m1GO:000155luteinization       | 2/2606  | 13/23843  | 0.423668 | 0.693594 | 0.659533 | Nr5a1/Pdg  |
| GO_BP_m1GO:000184phagolysosome       | 2/2606  | 13/23843  | 0.423668 | 0.693594 | 0.659533 | Rab34/Srp  |
| GO_BP_m1GO:000317mitral valve        | 2/2606  | 13/23843  | 0.423668 | 0.693594 | 0.659533 | Smad6/Zfp  |
| GO_BP_m1GO:000317pulmonary           | 2/2606  | 13/23843  | 0.423668 | 0.693594 | 0.659533 | Jag1/Smad  |
| GO_BP_m1GO:000318pulmonary           | 2/2606  | 13/23843  | 0.423668 | 0.693594 | 0.659533 | Jag1/Smad  |
| GO_BP_m1GO:000626mitochondrion       | 2/2606  | 13/23843  | 0.423668 | 0.693594 | 0.659533 | Lig3/Polg  |
| GO_BP_m1GO:000653polyamine           | 2/2606  | 13/23843  | 0.423668 | 0.693594 | 0.659533 | Agmat/Oa   |
| GO_BP_m1GO:000686nucleotide          | 2/2606  | 13/23843  | 0.423668 | 0.693594 | 0.659533 | Slc25a23/S |
| GO_BP_m1GO:000761short-term          | 2/2606  | 13/23843  | 0.423668 | 0.693594 | 0.659533 | Npas4/Ser  |
| GO_BP_m1GO:000906aspartate           | 2/2606  | 13/23843  | 0.423668 | 0.693594 | 0.659533 | Ddo/Got1   |
| GO_BP_m1GO:001080negative regulation | 2/2606  | 13/23843  | 0.423668 | 0.693594 | 0.659533 | Ccdc3/Peli |
| GO_BP_m1GO:001091positive regulation | 2/2606  | 13/23843  | 0.423668 | 0.693594 | 0.659533 | Myc/Park2  |
| GO_BP_m1GO:001580basic amino         | 2/2606  | 13/23843  | 0.423668 | 0.693594 | 0.659533 | Arg1/AU01  |
| GO_BP_m1GO:001918nonribosomal        | 2/2606  | 13/23843  | 0.423668 | 0.693594 | 0.659533 | Bdh2/Gclm  |
| GO_BP_m1GO:001937leukotriene         | 2/2606  | 13/23843  | 0.423668 | 0.693594 | 0.659533 | Alox5/Ltc4 |
| GO_BP_m1GO:002179thalamus            | 2/2606  | 13/23843  | 0.423668 | 0.693594 | 0.659533 | Ncam1/Sm   |
| GO_BP_m1GO:002193regulation          | 2/2606  | 13/23843  | 0.423668 | 0.693594 | 0.659533 | Cend1/Smc  |
| GO_BP_m1GO:003021hyaluronan          | 2/2606  | 13/23843  | 0.423668 | 0.693594 | 0.659533 | Has2/Nfkb  |
| GO_BP_m1GO:003025lipid glycosylation | 2/2606  | 13/23843  | 0.423668 | 0.693594 | 0.659533 | Abo/Slc35c |
| GO_BP_m1GO:003043fatty acid          | 2/2606  | 13/23843  | 0.423668 | 0.693594 | 0.659533 | Pecr/Tecr  |
| GO_BP_m1GO:003111negative regulation | 2/2606  | 13/23843  | 0.423668 | 0.693594 | 0.659533 | Snca/Stmn  |
| GO_BP_m1GO:003195negative regulation | 2/2606  | 13/23843  | 0.423668 | 0.693594 | 0.659533 | Cav1/Ptprc |
| GO_BP_m1GO:003230regulation          | 2/2606  | 13/23843  | 0.423668 | 0.693594 | 0.659533 | P2ry2/Tnfs |
| GO_BP_m1GO:003806collagen- $\alpha$  | 2/2606  | 13/23843  | 0.423668 | 0.693594 | 0.659533 | Col4a2/Ub  |
| GO_BP_m1GO:003809Fc receptor         | 2/2606  | 13/23843  | 0.423668 | 0.693594 | 0.659533 | Ms4a2/Osc  |
| GO_BP_m1GO:004253negative regulation | 2/2606  | 13/23843  | 0.423668 | 0.693594 | 0.659533 | Cav1/Traf3 |
| GO_BP_m1GO:004311negative regulation | 2/2606  | 13/23843  | 0.423668 | 0.693594 | 0.659533 | Adm/Ptprj  |
| GO_BP_m1GO:004324telomere            | 2/2606  | 13/23843  | 0.423668 | 0.693594 | 0.659533 | Dclre1a/Xr |
| GO_BP_m1GO:004351positive regulation | 2/2606  | 13/23843  | 0.423668 | 0.693594 | 0.659533 | Ankrd1/Atr |
| GO_BP_m1GO:004534MHC class           | 2/2606  | 13/23843  | 0.423668 | 0.693594 | 0.659533 | Ifng/Il10  |
| GO_BP_m1GO:004553positive regulation | 2/2606  | 13/23843  | 0.423668 | 0.693594 | 0.659533 | Ifng/Il2rg |
| GO_BP_m1GO:004830positive regulation | 2/2606  | 13/23843  | 0.423668 | 0.693594 | 0.659533 | Ifng/Ptprc |
| GO_BP_m1GO:004834paraxial muscle     | 2/2606  | 13/23843  | 0.423668 | 0.693594 | 0.659533 | Foxc1/Wnt  |
| GO_BP_m1GO:004848enteric nerve       | 2/2606  | 13/23843  | 0.423668 | 0.693594 | 0.659533 | Ednrb/Gdn  |
| GO_BP_m1GO:005113negative regulation | 2/2606  | 13/23843  | 0.423668 | 0.693594 | 0.659533 | Ppargc1a/1 |
| GO_BP_m1GO:005176actin crosslinking  | 2/2606  | 13/23843  | 0.423668 | 0.693594 | 0.659533 | Pls1/Pls3  |
| GO_BP_m1GO:005511relaxation          | 2/2606  | 13/23843  | 0.423668 | 0.693594 | 0.659533 | Akap6/Pde  |
| GO_BP_m1GO:006067branching           | 2/2606  | 13/23843  | 0.423668 | 0.693594 | 0.659533 | Adm/Il10   |

|                                         |           |          |          |          |             |
|-----------------------------------------|-----------|----------|----------|----------|-------------|
| GO_BP_m1GO:006091cardiac cell2/2606     | 13/23843  | 0.423668 | 0.693594 | 0.659533 | Wnt3a/Wnt1  |
| GO_BP_m1GO:007025regulation 2/2606      | 13/23843  | 0.423668 | 0.693594 | 0.659533 | Adora1/P2   |
| GO_BP_m1GO:007171ER-associa 2/2606      | 13/23843  | 0.423668 | 0.693594 | 0.659533 | Ufd1/Uggt   |
| GO_BP_m1GO:007242signal trans 2/2606    | 13/23843  | 0.423668 | 0.693594 | 0.659533 | Babam2/Ui   |
| GO_BP_m1GO:007253fibroblast a2/2606     | 13/23843  | 0.423668 | 0.693594 | 0.659533 | Acta2/Dga   |
| GO_BP_m1GO:008606AV node c2/2606        | 13/23843  | 0.423668 | 0.693594 | 0.659533 | Cacnb2/Gj   |
| GO_BP_m1GO:009019regulation 2/2606      | 13/23843  | 0.423668 | 0.693594 | 0.659533 | Il1rl1/Pyca |
| GO_BP_m1GO:009050RNA phos 2/2606        | 13/23843  | 0.423668 | 0.693594 | 0.659533 | Eri1/Exosc  |
| GO_BP_m1GO:009706response tr2/2606      | 13/23843  | 0.423668 | 0.693594 | 0.659533 | Lmo2/Ppar   |
| GO_BP_m1GO:009870calcium ior 2/2606     | 13/23843  | 0.423668 | 0.693594 | 0.659533 | Calcr/Trpv6 |
| GO_BP_m1GO:009887neurotrans 2/2606      | 13/23843  | 0.423668 | 0.693594 | 0.659533 | Arhgap44/   |
| GO_BP_m1GO:190002negative re2/2606      | 13/23843  | 0.423668 | 0.693594 | 0.659533 | Bcar1/Itgb  |
| GO_BP_m1GO:190217cellular res 2/2606    | 13/23843  | 0.423668 | 0.693594 | 0.659533 | Bcar1/Kcnc  |
| GO_BP_m1GO:190265calcium ior 2/2606     | 13/23843  | 0.423668 | 0.693594 | 0.659533 | Calcr/Trpv6 |
| GO_BP_m1GO:190299negative re2/2606      | 13/23843  | 0.423668 | 0.693594 | 0.659533 | C330021F2   |
| GO_BP_m1GO:190418positive re 2/2606     | 13/23843  | 0.423668 | 0.693594 | 0.659533 | Alox12/Dcr  |
| GO_BP_m1GO:200009regulation 2/2606      | 13/23843  | 0.423668 | 0.693594 | 0.659533 | Abl2/Mllt3  |
| GO_BP_m1GO:200048positive re 2/2606     | 13/23843  | 0.423668 | 0.693594 | 0.659533 | Hyal2/Pyca  |
| GO_BP_m1GO:200126regulation 2/2606      | 13/23843  | 0.423668 | 0.693594 | 0.659533 | Gsn/Tfap4   |
| GO_BP_m1GO:000202regulation 11/2606     | 92/23843  | 0.424157 | 0.693594 | 0.659533 | Atp1b2/At   |
| GO_BP_m1GO:001489striated m 11/2606     | 92/23843  | 0.424157 | 0.693594 | 0.659533 | Adk/Akap6   |
| GO_BP_m1GO:000002ribosomal l5/2606      | 39/23843  | 0.425183 | 0.693594 | 0.659533 | Dhx30/Mr    |
| GO_BP_m1GO:003043sleep 5/2606           | 39/23843  | 0.425183 | 0.693594 | 0.659533 | Adora1/D    |
| GO_BP_m1GO:003107embryonic 5/2606       | 39/23843  | 0.425183 | 0.693594 | 0.659533 | Aldh1a3/K   |
| GO_BP_m1GO:006012inner ear r5/2606      | 39/23843  | 0.425183 | 0.693594 | 0.659533 | Cthrc1/lft  |
| GO_BP_m1GO:006096regulation 5/2606      | 39/23843  | 0.425183 | 0.693594 | 0.659533 | Fmr1/Mael   |
| GO_BP_m1GO:007152semaphorin5/2606       | 39/23843  | 0.425183 | 0.693594 | 0.659533 | Mir23a/Mir  |
| GO_BP_m1GO:190199toxin trans 5/2606     | 39/23843  | 0.425183 | 0.693594 | 0.659533 | Antxr1/Ant  |
| GO_BP_m1GO:004326regulation 12/2606     | 101/23843 | 0.425531 | 0.693594 | 0.659533 | Adora1/Ad   |
| GO_BP_m1GO:005086negative re 13/2606    | 110/23843 | 0.426648 | 0.693594 | 0.659533 | Arg1/Cd80   |
| GO_BP_m1GO:006138regulation 14/2606     | 119/23843 | 0.42756  | 0.693594 | 0.659533 | Aatk/Cdk5   |
| GO_BP_m1GO:000150ossification41/2606    | 362/23843 | 0.428811 | 0.693594 | 0.659533 | Alpl/Ank/B  |
| GO_BP_m1GO:003263interleukin 16/2606    | 137/23843 | 0.428917 | 0.693594 | 0.659533 | 5730559C1   |
| GO_BP_m1GO:004666female sex 17/2606     | 146/23843 | 0.429415 | 0.693594 | 0.659533 | Ccdc182/A   |
| GO_BP_m1GO:005149negative re 17/2606    | 146/23843 | 0.429415 | 0.693594 | 0.659533 | Cav3/Cfl1/  |
| GO_BP_m1GO:004301camera-tyr 38/2606     | 335/23843 | 0.429431 | 0.693594 | 0.659533 | Ache/Aldh   |
| GO_BP_m1GO:003164regulation 6/2606      | 48/23843  | 0.429574 | 0.693594 | 0.659533 | Cdh2/Ifng/  |
| GO_BP_m1GO:004395cellular cor 6/2606    | 48/23843  | 0.429574 | 0.693594 | 0.659533 | 5730559C1   |
| GO_BP_m1GO:004650glycerolipic 6/2606    | 48/23843  | 0.429574 | 0.693594 | 0.659533 | Enpp2/Mgl   |
| GO_BP_m1GO:005195positive re 6/2606     | 48/23843  | 0.429574 | 0.693594 | 0.659533 | Abat/Avpr   |
| GO_BP_m1GO:003530regulation 19/2606     | 164/23843 | 0.430142 | 0.693594 | 0.659533 | 2810408A1   |
| GO_BP_m1GO:004875branching 21/2606      | 182/23843 | 0.430592 | 0.693594 | 0.659533 | Cav3/Dll4/  |
| GO_BP_m1GO:001905viral life cyc 22/2606 | 191/23843 | 0.430737 | 0.693594 | 0.659533 | Cav1/Chm    |
| GO_BP_m1GO:000270regulation 23/2606     | 200/23843 | 0.430837 | 0.693594 | 0.659533 | Aplf/Arg1/  |
| GO_BP_m1GO:000840gonad dev 24/2606      | 209/23843 | 0.430899 | 0.693594 | 0.659533 | Ccdc182/A   |
| GO_BP_m1GO:003476positive re 24/2606    | 209/23843 | 0.430899 | 0.693594 | 0.659533 | Abcb1a/Ac   |
| GO_BP_m1GO:003026entry into l 7/2606    | 57/23843  | 0.432631 | 0.693594 | 0.659533 | Cav1/Gsn/l  |
| GO_BP_m1GO:004440entry into l 7/2606    | 57/23843  | 0.432631 | 0.693594 | 0.659533 | Cav1/Gsn/l  |

|                                      |           |          |          |          |             |
|--------------------------------------|-----------|----------|----------|----------|-------------|
| GO_BP_m1GO:00518Centry into c7/2606  | 57/23843  | 0.432631 | 0.693594 | 0.659533 | Cav1/Gsn/I  |
| GO_BP_m1GO:005182entry into c7/2606  | 57/23843  | 0.432631 | 0.693594 | 0.659533 | Cav1/Gsn/I  |
| GO_BP_m1GO:006011inner ear rε7/2606  | 57/23843  | 0.432631 | 0.693594 | 0.659533 | Atp8b1/Ctl  |
| GO_BP_m1GO:190342positive reç7/2606  | 57/23843  | 0.432631 | 0.693594 | 0.659533 | Cd36/Ifng/  |
| GO_BP_m1GO:001605Wnt signali47/2606  | 417/23843 | 0.434263 | 0.693594 | 0.659533 | Abl2/Arntl/ |
| GO_BP_m1GO:000154ovarian foll8/2606  | 66/23843  | 0.434845 | 0.693594 | 0.659533 | Amh/Fancf   |
| GO_BP_m1GO:000333ε amino acid8/2606  | 66/23843  | 0.434845 | 0.693594 | 0.659533 | Arl6ip5/AU  |
| GO_BP_m1GO:000988embryonic 8/2606    | 66/23843  | 0.434845 | 0.693594 | 0.659533 | Foxa2/Mec   |
| GO_BP_m1GO:190188regulation 9/2606   | 75/23843  | 0.436487 | 0.693594 | 0.659533 | Bcas3/Cav1  |
| GO_BP_m1GO:000002ribosomal ε3/2606   | 22/23843  | 0.437551 | 0.693594 | 0.659533 | Eral1/Rps2  |
| GO_BP_m1GO:000027polysaccha3/2606    | 22/23843  | 0.437551 | 0.693594 | 0.659533 | Ppp1r3d/P   |
| GO_BP_m1GO:000191positive reç3/2606  | 22/23843  | 0.437551 | 0.693594 | 0.659533 | Fam49b/Il1  |
| GO_BP_m1GO:000714male meio:3/2606    | 22/23843  | 0.437551 | 0.693594 | 0.659533 | Btbd18/Dd   |
| GO_BP_m1GO:000741axonal fasc3/2606   | 22/23843  | 0.437551 | 0.693594 | 0.659533 | Ephb3/Nca   |
| GO_BP_m1GO:001097positive reç3/2606  | 22/23843  | 0.437551 | 0.693594 | 0.659533 | Cdc7/Cdk1   |
| GO_BP_m1GO:001485response tr3/2606   | 22/23843  | 0.437551 | 0.693594 | 0.659533 | Perm1/Ppa   |
| GO_BP_m1GO:001604detection c3/2606   | 22/23843  | 0.437551 | 0.693594 | 0.659533 | Adora1/An   |
| GO_BP_m1GO:00325Ccytokinetic 3/2606  | 22/23843  | 0.437551 | 0.693594 | 0.659533 | Kif23/Racg  |
| GO_BP_m1GO:00344Cresponse tr3/2606   | 22/23843  | 0.437551 | 0.693594 | 0.659533 | lft88/Ptgs2 |
| GO_BP_m1GO:003502negative re3/2606   | 22/23843  | 0.437551 | 0.693594 | 0.659533 | Abl2/Ficn/I |
| GO_BP_m1GO:003563response tr3/2606   | 22/23843  | 0.437551 | 0.693594 | 0.659533 | Cd36/Mup    |
| GO_BP_m1GO:004257retinoic aci3/2606  | 22/23843  | 0.437551 | 0.693594 | 0.659533 | Adh1/Aldh   |
| GO_BP_m1GO:004485hair cycle ç3/2606  | 22/23843  | 0.437551 | 0.693594 | 0.659533 | Ctsl/Krtap2 |
| GO_BP_m1GO:004665tetrahydrof3/2606   | 22/23843  | 0.437551 | 0.693594 | 0.659533 | Gch1/Mthf   |
| GO_BP_m1GO:004833paraxial mε3/2606   | 22/23843  | 0.437551 | 0.693594 | 0.659533 | Foxc1/Tcf1  |
| GO_BP_m1GO:004853anatomical 3/2606   | 22/23843  | 0.437551 | 0.693594 | 0.659533 | Hoxb1/Kcn   |
| GO_BP_m1GO:004885neural nucl3/2606   | 22/23843  | 0.437551 | 0.693594 | 0.659533 | Aldh1a3/Ai  |
| GO_BP_m1GO:005099negative re3/2606   | 22/23843  | 0.437551 | 0.693594 | 0.659533 | Adora1/Hc   |
| GO_BP_m1GO:005144positive reç3/2606  | 22/23843  | 0.437551 | 0.693594 | 0.659533 | Dmrt1/Fbx   |
| GO_BP_m1GO:006026positive reç3/2606  | 22/23843  | 0.437551 | 0.693594 | 0.659533 | Cand1/Psr   |
| GO_BP_m1GO:006057intestinal e3/2606  | 22/23843  | 0.437551 | 0.693594 | 0.659533 | Cdh1/Gsdr   |
| GO_BP_m1GO:006108myeloid let3/2606   | 22/23843  | 0.437551 | 0.693594 | 0.659533 | Cd36/Gprc   |
| GO_BP_m1GO:010603neuron prc3/2606    | 22/23843  | 0.437551 | 0.693594 | 0.659533 | Ephb3/Nca   |
| GO_BP_m1GO:190074positive reç3/2606  | 22/23843  | 0.437551 | 0.693594 | 0.659533 | Kars/Prmt1  |
| GO_BP_m1GO:190153regulation 3/2606   | 22/23843  | 0.437551 | 0.693594 | 0.659533 | Eif2ak2/Flo |
| GO_BP_m1GO:190165glycosyl co3/2606   | 22/23843  | 0.437551 | 0.693594 | 0.659533 | Abhd10/Dε   |
| GO_BP_m1GO:190288positive reç3/2606  | 22/23843  | 0.437551 | 0.693594 | 0.659533 | Endog/H2ε   |
| GO_BP_m1GO:19033Cnegative re3/2606   | 22/23843  | 0.437551 | 0.693594 | 0.659533 | Bcr/Fmr1/T  |
| GO_BP_m1GO:001066regulation 10/2606  | 84/23843  | 0.437725 | 0.693594 | 0.659533 | Alox12/Bni  |
| GO_BP_m1GO:003571CD4-positi10/2606   | 84/23843  | 0.437725 | 0.693594 | 0.659533 | Gpr183/Ifn  |
| GO_BP_m1GO:007209regulation 10/2606  | 84/23843  | 0.437725 | 0.693594 | 0.659533 | Dct/Dmrta:  |
| GO_BP_m1GO:014002exocytic pr10/2606  | 84/23843  | 0.437725 | 0.693594 | 0.659533 | Ncam1/P2i   |
| GO_BP_m1GO:000649protein lipi11/2606 | 93/23843  | 0.438665 | 0.693594 | 0.659533 | Atg10/Maç   |
| GO_BP_m1GO:001082regulation 11/2606  | 93/23843  | 0.438665 | 0.693594 | 0.659533 | Adipor2/Aç  |
| GO_BP_m1GO:003004actin filamε12/2606 | 102/23843 | 0.43938  | 0.693594 | 0.659533 | Acta2/Akaç  |
| GO_BP_m1GO:000039spliceosom1/2606    | 5/23843   | 0.439418 | 0.693594 | 0.659533 | Prpf19      |
| GO_BP_m1GO:000039mRNA 5'-s1/2606     | 5/23843   | 0.439418 | 0.693594 | 0.659533 | Psip1       |
| GO_BP_m1GO:000072double-str1/2606    | 5/23843   | 0.439418 | 0.693594 | 0.659533 | Cdc7        |

|                   |                     |         |          |          |          |         |
|-------------------|---------------------|---------|----------|----------|----------|---------|
| GO_BP_m1GO:000095 | mitochond 1/2606    | 5/23843 | 0.439418 | 0.693594 | 0.659533 | Pnpt1   |
| GO_BP_m1GO:000096 | mitochond 1/2606    | 5/23843 | 0.439418 | 0.693594 | 0.659533 | Pnpt1   |
| GO_BP_m1GO:000156 | fatty acid a 1/2606 | 5/23843 | 0.439418 | 0.693594 | 0.659533 | Phyh    |
| GO_BP_m1GO:000166 | conditioner 1/2606  | 5/23843 | 0.439418 | 0.693594 | 0.659533 | Tbr1    |
| GO_BP_m1GO:000197 | regulation 1/2606   | 5/23843 | 0.439418 | 0.693594 | 0.659533 | Adra1d  |
| GO_BP_m1GO:000227 | eosinophil 1/2606   | 5/23843 | 0.439418 | 0.693594 | 0.659533 | Stx4a   |
| GO_BP_m1GO:000232 | B cell linea 1/2606 | 5/23843 | 0.439418 | 0.693594 | 0.659533 | Prkdc   |
| GO_BP_m1GO:000244 | eosinophil 1/2606   | 5/23843 | 0.439418 | 0.693594 | 0.659533 | Stx4a   |
| GO_BP_m1GO:000256 | somatic div 1/2606  | 5/23843 | 0.439418 | 0.693594 | 0.659533 | Prkdc   |
| GO_BP_m1GO:000258 | regulation 1/2606   | 5/23843 | 0.439418 | 0.693594 | 0.659533 | Pycard  |
| GO_BP_m1GO:000268 | somatic rec 1/2606  | 5/23843 | 0.439418 | 0.693594 | 0.659533 | Prkdc   |
| GO_BP_m1GO:000274 | negative re 1/2606  | 5/23843 | 0.439418 | 0.693594 | 0.659533 | Il10    |
| GO_BP_m1GO:000319 | mitral valve 1/2606 | 5/23843 | 0.439418 | 0.693594 | 0.659533 | Zfpm2   |
| GO_BP_m1GO:000328 | atrial septu 1/2606 | 5/23843 | 0.439418 | 0.693594 | 0.659533 | Nsd2    |
| GO_BP_m1GO:000611 | glycerol bic 1/2606 | 5/23843 | 0.439418 | 0.693594 | 0.659533 | Got1    |
| GO_BP_m1GO:000616 | AMP biosy 1/2606    | 5/23843 | 0.439418 | 0.693594 | 0.659533 | Adss    |
| GO_BP_m1GO:000639 | mRNA 3'-e 1/2606    | 5/23843 | 0.439418 | 0.693594 | 0.659533 | Cpsf2   |
| GO_BP_m1GO:000643 | phenylalan 1/2606   | 5/23843 | 0.439418 | 0.693594 | 0.659533 | Lrrc47  |
| GO_BP_m1GO:000644 | regulation 1/2606   | 5/23843 | 0.439418 | 0.693594 | 0.659533 | Ogfd1   |
| GO_BP_m1GO:000654 | histidine ca 1/2606 | 5/23843 | 0.439418 | 0.693594 | 0.659533 | Hdc     |
| GO_BP_m1GO:000654 | isoleucine r 1/2606 | 5/23843 | 0.439418 | 0.693594 | 0.659533 | Bcat2   |
| GO_BP_m1GO:000659 | polyamine 1/2606    | 5/23843 | 0.439418 | 0.693594 | 0.659533 | Sat1    |
| GO_BP_m1GO:000665 | phosphatic 1/2606   | 5/23843 | 0.439418 | 0.693594 | 0.659533 | Tmem269 |
| GO_BP_m1GO:000677 | vitamin A r 1/2606  | 5/23843 | 0.439418 | 0.693594 | 0.659533 | Dgat1   |
| GO_BP_m1GO:000717 | activation c 1/2606 | 5/23843 | 0.439418 | 0.693594 | 0.659533 | Nrg1    |
| GO_BP_m1GO:000735 | zygoti det 1/2606   | 5/23843 | 0.439418 | 0.693594 | 0.659533 | Wt1     |
| GO_BP_m1GO:000829 | spermidine 1/2606   | 5/23843 | 0.439418 | 0.693594 | 0.659533 | Agmat   |
| GO_BP_m1GO:000861 | ether lipid 1/2606  | 5/23843 | 0.439418 | 0.693594 | 0.659533 | Fasn    |
| GO_BP_m1GO:000905 | pentose-pl 1/2606   | 5/23843 | 0.439418 | 0.693594 | 0.659533 | Rpe     |
| GO_BP_m1GO:000915 | deoxyribor 1/2606   | 5/23843 | 0.439418 | 0.693594 | 0.659533 | Shmt1   |
| GO_BP_m1GO:000917 | pyrimidine 1/2606   | 5/23843 | 0.439418 | 0.693594 | 0.659533 | Shmt1   |
| GO_BP_m1GO:000920 | deoxyribor 1/2606   | 5/23843 | 0.439418 | 0.693594 | 0.659533 | Adk     |
| GO_BP_m1GO:000925 | 10-formylt 1/2606   | 5/23843 | 0.439418 | 0.693594 | 0.659533 | Mthfd1l |
| GO_BP_m1GO:000944 | gamma-an 1/2606     | 5/23843 | 0.439418 | 0.693594 | 0.659533 | Abat    |
| GO_BP_m1GO:001051 | positive re 1/2606  | 5/23843 | 0.439418 | 0.693594 | 0.659533 | Fpr2    |
| GO_BP_m1GO:001051 | negative re 1/2606  | 5/23843 | 0.439418 | 0.693594 | 0.659533 | Angptl3 |
| GO_BP_m1GO:001057 | positive re 1/2606  | 5/23843 | 0.439418 | 0.693594 | 0.659533 | Cdc7    |
| GO_BP_m1GO:001060 | positive re 1/2606  | 5/23843 | 0.439418 | 0.693594 | 0.659533 | Cnot6l  |
| GO_BP_m1GO:001063 | negative re 1/2606  | 5/23843 | 0.439418 | 0.693594 | 0.659533 | Bnip3   |
| GO_BP_m1GO:001069 | positive re 1/2606  | 5/23843 | 0.439418 | 0.693594 | 0.659533 | Npnt    |
| GO_BP_m1GO:001091 | regulation 1/2606   | 5/23843 | 0.439418 | 0.693594 | 0.659533 | Itgam   |
| GO_BP_m1GO:001091 | positive re 1/2606  | 5/23843 | 0.439418 | 0.693594 | 0.659533 | Itgam   |
| GO_BP_m1GO:001095 | negative re 1/2606  | 5/23843 | 0.439418 | 0.693594 | 0.659533 | Nfkb1   |
| GO_BP_m1GO:001098 | positive re 1/2606  | 5/23843 | 0.439418 | 0.693594 | 0.659533 | Anxa2   |
| GO_BP_m1GO:001098 | negative re 1/2606  | 5/23843 | 0.439418 | 0.693594 | 0.659533 | Pcsk9   |
| GO_BP_m1GO:001099 | negative re 1/2606  | 5/23843 | 0.439418 | 0.693594 | 0.659533 | Smad6   |
| GO_BP_m1GO:001099 | free ubiqui 1/2606  | 5/23843 | 0.439418 | 0.693594 | 0.659533 | Park2   |
| GO_BP_m1GO:001402 | notochord 1/2606    | 5/23843 | 0.439418 | 0.693594 | 0.659533 | Epha2   |



|                               |        |         |          |          |          |          |
|-------------------------------|--------|---------|----------|----------|----------|----------|
| GO_BP_m1GO:001404establishm   | 1/2606 | 5/23843 | 0.439418 | 0.693594 | 0.659533 | Wnt7a    |
| GO_BP_m1GO:001483skeletal m   | 1/2606 | 5/23843 | 0.439418 | 0.693594 | 0.659533 | Wnt7a    |
| GO_BP_m1GO:001487response tr  | 1/2606 | 5/23843 | 0.439418 | 0.693594 | 0.659533 | Prkag3   |
| GO_BP_m1GO:001501heparan su   | 1/2606 | 5/23843 | 0.439418 | 0.693594 | 0.659533 | Hs6st1   |
| GO_BP_m1GO:00157Ciodide tran  | 1/2606 | 5/23843 | 0.439418 | 0.693594 | 0.659533 | Ano1     |
| GO_BP_m1GO:001584urea trans   | 1/2606 | 5/23843 | 0.439418 | 0.693594 | 0.659533 | Slc14a2  |
| GO_BP_m1GO:001588cobalamin    | 1/2606 | 5/23843 | 0.439418 | 0.693594 | 0.659533 | Gif      |
| GO_BP_m1GO:001618synaptic ve  | 1/2606 | 5/23843 | 0.439418 | 0.693594 | 0.659533 | Dnm3     |
| GO_BP_m1GO:001923propriocep   | 1/2606 | 5/23843 | 0.439418 | 0.693594 | 0.659533 | Tmem150c |
| GO_BP_m1GO:001934dolichol m   | 1/2606 | 5/23843 | 0.439418 | 0.693594 | 0.659533 | Nus1     |
| GO_BP_m1GO:002156glossophar   | 1/2606 | 5/23843 | 0.439418 | 0.693594 | 0.659533 | Hoxa3    |
| GO_BP_m1GO:002163trigeminal   | 1/2606 | 5/23843 | 0.439418 | 0.693594 | 0.659533 | Sema3f   |
| GO_BP_m1GO:002163trigeminal   | 1/2606 | 5/23843 | 0.439418 | 0.693594 | 0.659533 | Sema3f   |
| GO_BP_m1GO:002191negative re  | 1/2606 | 5/23843 | 0.439418 | 0.693594 | 0.659533 | Tulp3    |
| GO_BP_m1GO:002241protein ma   | 1/2606 | 5/23843 | 0.439418 | 0.693594 | 0.659533 | Ero1l    |
| GO_BP_m1GO:003022eosinophil   | 1/2606 | 5/23843 | 0.439418 | 0.693594 | 0.659533 | Trib1    |
| GO_BP_m1GO:003024autophagy    | 1/2606 | 5/23843 | 0.439418 | 0.693594 | 0.659533 | Pik3r4   |
| GO_BP_m1GO:003039membrane     | 1/2606 | 5/23843 | 0.439418 | 0.693594 | 0.659533 | Pafah1b1 |
| GO_BP_m1GO:003128positive re  | 1/2606 | 5/23843 | 0.439418 | 0.693594 | 0.659533 | Guca1a   |
| GO_BP_m1GO:003158regulation   | 1/2606 | 5/23843 | 0.439418 | 0.693594 | 0.659533 | Asph     |
| GO_BP_m1GO:003207positive re  | 1/2606 | 5/23843 | 0.439418 | 0.693594 | 0.659533 | Pcna     |
| GO_BP_m1GO:003268negative re  | 1/2606 | 5/23843 | 0.439418 | 0.693594 | 0.659533 | Nmi      |
| GO_BP_m1GO:003274positive re  | 1/2606 | 5/23843 | 0.439418 | 0.693594 | 0.659533 | lfng     |
| GO_BP_m1GO:003284regulation   | 1/2606 | 5/23843 | 0.439418 | 0.693594 | 0.659533 | Avpr1a   |
| GO_BP_m1GO:003289neurotrop    | 1/2606 | 5/23843 | 0.439418 | 0.693594 | 0.659533 | Adora1   |
| GO_BP_m1GO:003296positive re  | 1/2606 | 5/23843 | 0.439418 | 0.693594 | 0.659533 | P2ry1    |
| GO_BP_m1GO:003302mast cell h  | 1/2606 | 5/23843 | 0.439418 | 0.693594 | 0.659533 | Kitl     |
| GO_BP_m1GO:003302mast cell a  | 1/2606 | 5/23843 | 0.439418 | 0.693594 | 0.659533 | Kitl     |
| GO_BP_m1GO:003302regulation   | 1/2606 | 5/23843 | 0.439418 | 0.693594 | 0.659533 | Kitl     |
| GO_BP_m1GO:003303positive re  | 1/2606 | 5/23843 | 0.439418 | 0.693594 | 0.659533 | Hcar2    |
| GO_BP_m1GO:003315T cell rece  | 1/2606 | 5/23843 | 0.439418 | 0.693594 | 0.659533 | Prkdc    |
| GO_BP_m1GO:003356anterior/pc  | 1/2606 | 5/23843 | 0.439418 | 0.693594 | 0.659533 | Unc5c    |
| GO_BP_m1GO:003356DNA replic   | 1/2606 | 5/23843 | 0.439418 | 0.693594 | 0.659533 | Fen1     |
| GO_BP_m1GO:003357protein gly  | 1/2606 | 5/23843 | 0.439418 | 0.693594 | 0.659533 | Fut8     |
| GO_BP_m1GO:00336Cnegative re  | 1/2606 | 5/23843 | 0.439418 | 0.693594 | 0.659533 | Abat     |
| GO_BP_m1GO:003368negative re  | 1/2606 | 5/23843 | 0.439418 | 0.693594 | 0.659533 | Tacr2    |
| GO_BP_m1GO:003418positive re  | 1/2606 | 5/23843 | 0.439418 | 0.693594 | 0.659533 | H2afy    |
| GO_BP_m1GO:003422tRNA thio-   | 1/2606 | 5/23843 | 0.439418 | 0.693594 | 0.659533 | Urm1     |
| GO_BP_m1GO:003444very-low-c   | 1/2606 | 5/23843 | 0.439418 | 0.693594 | 0.659533 | Vldlr    |
| GO_BP_m1GO:003546determinat   | 1/2606 | 5/23843 | 0.439418 | 0.693594 | 0.659533 | Dnaaf1   |
| GO_BP_m1GO:003548gastric em   | 1/2606 | 5/23843 | 0.439418 | 0.693594 | 0.659533 | Drd3     |
| GO_BP_m1GO:003552proline trar | 1/2606 | 5/23843 | 0.439418 | 0.693594 | 0.659533 | Slc6a20a |
| GO_BP_m1GO:003554interferon-  | 1/2606 | 5/23843 | 0.439418 | 0.693594 | 0.659533 | Ptpn22   |
| GO_BP_m1GO:003554regulation   | 1/2606 | 5/23843 | 0.439418 | 0.693594 | 0.659533 | Ptpn22   |
| GO_BP_m1GO:003554positive re  | 1/2606 | 5/23843 | 0.439418 | 0.693594 | 0.659533 | Ptpn22   |
| GO_BP_m1GO:003563entry of ba  | 1/2606 | 5/23843 | 0.439418 | 0.693594 | 0.659533 | Cav1     |
| GO_BP_m1GO:003569mitochond    | 1/2606 | 5/23843 | 0.439418 | 0.693594 | 0.659533 | Bnip3    |
| GO_BP_m1GO:003574CD8-positi   | 1/2606 | 5/23843 | 0.439418 | 0.693594 | 0.659533 | Ptpn22   |

|          |           |                            |        |         |          |          |          |          |
|----------|-----------|----------------------------|--------|---------|----------|----------|----------|----------|
| GO_BP_m1 | GO:003574 | natural killer cell        | 1/2606 | 5/23843 | 0.439418 | 0.693594 | 0.659533 | Ccl4     |
| GO_BP_m1 | GO:003577 | interleukin-1              | 1/2606 | 5/23843 | 0.439418 | 0.693594 | 0.659533 | Jak3     |
| GO_BP_m1 | GO:003578 | cell migration             | 1/2606 | 5/23843 | 0.439418 | 0.693594 | 0.659533 | Pdgfra   |
| GO_BP_m1 | GO:003579 | negative regulation of     | 1/2606 | 5/23843 | 0.439418 | 0.693594 | 0.659533 | Bnip3    |
| GO_BP_m1 | GO:003580 | response to                | 1/2606 | 5/23843 | 0.439418 | 0.693594 | 0.659533 | Crhbp    |
| GO_BP_m1 | GO:003581 | cellular response to       | 1/2606 | 5/23843 | 0.439418 | 0.693594 | 0.659533 | Crhbp    |
| GO_BP_m1 | GO:003582 | parathyroid hormone        | 1/2606 | 5/23843 | 0.439418 | 0.693594 | 0.659533 | Trpv6    |
| GO_BP_m1 | GO:003590 | response to                | 1/2606 | 5/23843 | 0.439418 | 0.693594 | 0.659533 | Aoc3     |
| GO_BP_m1 | GO:003593 | corticosteroid             | 1/2606 | 5/23843 | 0.439418 | 0.693594 | 0.659533 | Tac1     |
| GO_BP_m1 | GO:003596 | COPII-coated vesicle       | 1/2606 | 5/23843 | 0.439418 | 0.693594 | 0.659533 | Gbf1     |
| GO_BP_m1 | GO:003626 | RNA (guanine) biosynthesis | 1/2606 | 5/23843 | 0.439418 | 0.693594 | 0.659533 | Rnmt     |
| GO_BP_m1 | GO:003817 | cannabinoid                | 1/2606 | 5/23843 | 0.439418 | 0.693594 | 0.659533 | Mgll     |
| GO_BP_m1 | GO:004253 | negative regulation of     | 1/2606 | 5/23843 | 0.439418 | 0.693594 | 0.659533 | Il10     |
| GO_BP_m1 | GO:004330 | eosinophil                 | 1/2606 | 5/23843 | 0.439418 | 0.693594 | 0.659533 | Stx4a    |
| GO_BP_m1 | GO:004340 | cortisol secretion         | 1/2606 | 5/23843 | 0.439418 | 0.693594 | 0.659533 | Galr1    |
| GO_BP_m1 | GO:004357 | maintenance of             | 1/2606 | 5/23843 | 0.439418 | 0.693594 | 0.659533 | Msh3     |
| GO_BP_m1 | GO:004365 | recognition                | 1/2606 | 5/23843 | 0.439418 | 0.693594 | 0.659533 | Scarb1   |
| GO_BP_m1 | GO:004504 | protein insulin            | 1/2606 | 5/23843 | 0.439418 | 0.693594 | 0.659533 | Wrb      |
| GO_BP_m1 | GO:004534 | MHC class II               | 1/2606 | 5/23843 | 0.439418 | 0.693594 | 0.659533 | Hsph1    |
| GO_BP_m1 | GO:004534 | regulation of              | 1/2606 | 5/23843 | 0.439418 | 0.693594 | 0.659533 | Hsph1    |
| GO_BP_m1 | GO:004534 | positive regulation of     | 1/2606 | 5/23843 | 0.439418 | 0.693594 | 0.659533 | Hsph1    |
| GO_BP_m1 | GO:004534 | interferon-gamma           | 1/2606 | 5/23843 | 0.439418 | 0.693594 | 0.659533 | Nmi      |
| GO_BP_m1 | GO:004535 | regulation of              | 1/2606 | 5/23843 | 0.439418 | 0.693594 | 0.659533 | Nmi      |
| GO_BP_m1 | GO:004595 | negative regulation of     | 1/2606 | 5/23843 | 0.439418 | 0.693594 | 0.659533 | Blm      |
| GO_BP_m1 | GO:004599 | carbon catabolism          | 1/2606 | 5/23843 | 0.439418 | 0.693594 | 0.659533 | Foxa2    |
| GO_BP_m1 | GO:004599 | carbon catabolism          | 1/2606 | 5/23843 | 0.439418 | 0.693594 | 0.659533 | Foxa2    |
| GO_BP_m1 | GO:004601 | regulation of              | 1/2606 | 5/23843 | 0.439418 | 0.693594 | 0.659533 | Foxa2    |
| GO_BP_m1 | GO:004647 | glycosylceramide           | 1/2606 | 5/23843 | 0.439418 | 0.693594 | 0.659533 | B4galt3  |
| GO_BP_m1 | GO:004650 | protoporphyrin             | 1/2606 | 5/23843 | 0.439418 | 0.693594 | 0.659533 | Eif2ak1  |
| GO_BP_m1 | GO:004650 | glycerol et al             | 1/2606 | 5/23843 | 0.439418 | 0.693594 | 0.659533 | Fasn     |
| GO_BP_m1 | GO:004661 | drug export                | 1/2606 | 5/23843 | 0.439418 | 0.693594 | 0.659533 | Abcb1a   |
| GO_BP_m1 | GO:004687 | positive regulation of     | 1/2606 | 5/23843 | 0.439418 | 0.693594 | 0.659533 | Tac1     |
| GO_BP_m1 | GO:004831 | axial mesoderm             | 1/2606 | 5/23843 | 0.439418 | 0.693594 | 0.659533 | Epha2    |
| GO_BP_m1 | GO:004866 | collateral sprouting       | 1/2606 | 5/23843 | 0.439418 | 0.693594 | 0.659533 | Wnt3a    |
| GO_BP_m1 | GO:004867 | axon extension             | 1/2606 | 5/23843 | 0.439418 | 0.693594 | 0.659533 | Lamb2    |
| GO_BP_m1 | GO:004885 | formation of               | 1/2606 | 5/23843 | 0.439418 | 0.693594 | 0.659533 | Ntf5     |
| GO_BP_m1 | GO:005065 | dermatan sulfate           | 1/2606 | 5/23843 | 0.439418 | 0.693594 | 0.659533 | Dse      |
| GO_BP_m1 | GO:005071 | negative regulation of     | 1/2606 | 5/23843 | 0.439418 | 0.693594 | 0.659533 | Zc3h12a  |
| GO_BP_m1 | GO:005081 | regulation of              | 1/2606 | 5/23843 | 0.439418 | 0.693594 | 0.659533 | Snca     |
| GO_BP_m1 | GO:005095 | thermoception              | 1/2606 | 5/23843 | 0.439418 | 0.693594 | 0.659533 | Cpeb3    |
| GO_BP_m1 | GO:005100 | negative regulation of     | 1/2606 | 5/23843 | 0.439418 | 0.693594 | 0.659533 | Angptl3  |
| GO_BP_m1 | GO:005100 | regulation of              | 1/2606 | 5/23843 | 0.439418 | 0.693594 | 0.659533 | Rab5a    |
| GO_BP_m1 | GO:005108 | nuclear envelope           | 1/2606 | 5/23843 | 0.439418 | 0.693594 | 0.659533 | Pafah1b1 |
| GO_BP_m1 | GO:005109 | positive regulation of     | 1/2606 | 5/23843 | 0.439418 | 0.693594 | 0.659533 | Msh3     |
| GO_BP_m1 | GO:005112 | hepoxilin A2               | 1/2606 | 5/23843 | 0.439418 | 0.693594 | 0.659533 | Alox12   |
| GO_BP_m1 | GO:005112 | hepoxilin B2               | 1/2606 | 5/23843 | 0.439418 | 0.693594 | 0.659533 | Alox12   |
| GO_BP_m1 | GO:005146 | regulation of              | 1/2606 | 5/23843 | 0.439418 | 0.693594 | 0.659533 | Galr1    |
| GO_BP_m1 | GO:005156 | negative regulation of     | 1/2606 | 5/23843 | 0.439418 | 0.693594 | 0.659533 | Micu2    |

|                                      |         |          |          |          |          |
|--------------------------------------|---------|----------|----------|----------|----------|
| GO_BP_m1GO:005161regulation 1/2606   | 5/23843 | 0.439418 | 0.693594 | 0.659533 | Snca     |
| GO_BP_m1GO:005166maintenance 1/2606  | 5/23843 | 0.439418 | 0.693594 | 0.659533 | Pafah1b1 |
| GO_BP_m1GO:005166actin cortic 1/2606 | 5/23843 | 0.439418 | 0.693594 | 0.659533 | Wipf1    |
| GO_BP_m1GO:005175meiotic sist 1/2606 | 5/23843 | 0.439418 | 0.693594 | 0.659533 | Ppp2r1a  |
| GO_BP_m1GO:005179medium-cl 1/2606    | 5/23843 | 0.439418 | 0.693594 | 0.659533 | Abhd1    |
| GO_BP_m1GO:005196negative re 1/2606  | 5/23843 | 0.439418 | 0.693594 | 0.659533 | Epha7    |
| GO_BP_m1GO:006013maternal p 1/2606   | 5/23843 | 0.439418 | 0.693594 | 0.659533 | Arntl    |
| GO_BP_m1GO:006016positive re 1/2606  | 5/23843 | 0.439418 | 0.693594 | 0.659533 | Drd3     |
| GO_BP_m1GO:006031positive re 1/2606  | 5/23843 | 0.439418 | 0.693594 | 0.659533 | Akap6    |
| GO_BP_m1GO:006033negative re 1/2606  | 5/23843 | 0.439418 | 0.693594 | 0.659533 | Arg1     |
| GO_BP_m1GO:006033negative re 1/2606  | 5/23843 | 0.439418 | 0.693594 | 0.659533 | Arg1     |
| GO_BP_m1GO:006035positive re 1/2606  | 5/23843 | 0.439418 | 0.693594 | 0.659533 | Cav1     |
| GO_BP_m1GO:006062regulation 1/2606   | 5/23843 | 0.439418 | 0.693594 | 0.659533 | Wapl     |
| GO_BP_m1GO:006066regulation 1/2606   | 5/23843 | 0.439418 | 0.693594 | 0.659533 | Fgf7     |
| GO_BP_m1GO:006068branch elo 1/2606   | 5/23843 | 0.439418 | 0.693594 | 0.659533 | Fgf1     |
| GO_BP_m1GO:006069regulation 1/2606   | 5/23843 | 0.439418 | 0.693594 | 0.659533 | Scarb1   |
| GO_BP_m1GO:006094cardiac vas 1/2606  | 5/23843 | 0.439418 | 0.693594 | 0.659533 | Smad6    |
| GO_BP_m1GO:006095endocardia 1/2606   | 5/23843 | 0.439418 | 0.693594 | 0.659533 | Sox18    |
| GO_BP_m1GO:006104positive re 1/2606  | 5/23843 | 0.439418 | 0.693594 | 0.659533 | Pdgfra   |
| GO_BP_m1GO:006107ciliary body 1/2606 | 5/23843 | 0.439418 | 0.693594 | 0.659533 | Jag1     |
| GO_BP_m1GO:006131canonical v 1/2606  | 5/23843 | 0.439418 | 0.693594 | 0.659533 | Wnt3a    |
| GO_BP_m1GO:006174motor lear 1/2606   | 5/23843 | 0.439418 | 0.693594 | 0.659533 | C1ql1    |
| GO_BP_m1GO:007012ciliary neur 1/2606 | 5/23843 | 0.439418 | 0.693594 | 0.659533 | Cntfr    |
| GO_BP_m1GO:007012mitochond 1/2606    | 5/23843 | 0.439418 | 0.693594 | 0.659533 | Gfm1     |
| GO_BP_m1GO:007042nucleotide 1/2606   | 5/23843 | 0.439418 | 0.693594 | 0.659533 | Peli3    |
| GO_BP_m1GO:007048monocyte 1/2606     | 5/23843 | 0.439418 | 0.693594 | 0.659533 | Has2     |
| GO_BP_m1GO:007066response tr 1/2606  | 5/23843 | 0.439418 | 0.693594 | 0.659533 | Jak3     |
| GO_BP_m1GO:007067response tr 1/2606  | 5/23843 | 0.439418 | 0.693594 | 0.659533 | Jak3     |
| GO_BP_m1GO:007103nuclear pol 1/2606  | 5/23843 | 0.439418 | 0.693594 | 0.659533 | Exosc9   |
| GO_BP_m1GO:007128cellular res 1/2606 | 5/23843 | 0.439418 | 0.693594 | 0.659533 | Atp7b    |
| GO_BP_m1GO:007131cellular res 1/2606 | 5/23843 | 0.439418 | 0.693594 | 0.659533 | Nfkb1    |
| GO_BP_m1GO:007144positive re 1/2606  | 5/23843 | 0.439418 | 0.693594 | 0.659533 | Kat2b    |
| GO_BP_m1GO:007145cellular res 1/2606 | 5/23843 | 0.439418 | 0.693594 | 0.659533 | Cav1     |
| GO_BP_m1GO:007155histone H3 1/2606   | 5/23843 | 0.439418 | 0.693594 | 0.659533 | Kdm6b    |
| GO_BP_m1GO:007159lymphocyte 1/2606   | 5/23843 | 0.439418 | 0.693594 | 0.659533 | Adam8    |
| GO_BP_m1GO:007168response tr 1/2606  | 5/23843 | 0.439418 | 0.693594 | 0.659533 | Cdh1     |
| GO_BP_m1GO:007168cellular res 1/2606 | 5/23843 | 0.439418 | 0.693594 | 0.659533 | Cdh1     |
| GO_BP_m1GO:007200mesangial 1/2606    | 5/23843 | 0.439418 | 0.693594 | 0.659533 | Osr1     |
| GO_BP_m1GO:007202distal conv 1/2606  | 5/23843 | 0.439418 | 0.693594 | 0.659533 | Pou3f3   |
| GO_BP_m1GO:007214mesangial 1/2606    | 5/23843 | 0.439418 | 0.693594 | 0.659533 | Osr1     |
| GO_BP_m1GO:007222metaneph 1/2606     | 5/23843 | 0.439418 | 0.693594 | 0.659533 | Pou3f3   |
| GO_BP_m1GO:007223metaneph 1/2606     | 5/23843 | 0.439418 | 0.693594 | 0.659533 | Pou3f3   |
| GO_BP_m1GO:007251positive re 1/2606  | 5/23843 | 0.439418 | 0.693594 | 0.659533 | Tbx1     |
| GO_BP_m1GO:007275cellular res 1/2606 | 5/23843 | 0.439418 | 0.693594 | 0.659533 | Blm      |
| GO_BP_m1GO:008602adenylate c 1/2606  | 5/23843 | 0.439418 | 0.693594 | 0.659533 | Atp2b4   |
| GO_BP_m1GO:008604membrane 1/2606     | 5/23843 | 0.439418 | 0.693594 | 0.659533 | Cacnb2   |
| GO_BP_m1GO:009024axis elonga 1/2606  | 5/23843 | 0.439418 | 0.693594 | 0.659533 | Wnt3a    |
| GO_BP_m1GO:009038regulation 1/2606   | 5/23843 | 0.439418 | 0.693594 | 0.659533 | Wnt3a    |

|                                     |           |          |          |          |           |
|-------------------------------------|-----------|----------|----------|----------|-----------|
| GO_BP_m1GO:009721response tr1/2606  | 5/23843   | 0.439418 | 0.693594 | 0.659533 | Crhbp     |
| GO_BP_m1GO:009721cellular res1/2606 | 5/23843   | 0.439418 | 0.693594 | 0.659533 | Crhbp     |
| GO_BP_m1GO:009746ubiquitin-c1/2606  | 5/23843   | 0.439418 | 0.693594 | 0.659533 | Man1b1    |
| GO_BP_m1GO:009763L-arginine 1/2606  | 5/23843   | 0.439418 | 0.693594 | 0.659533 | AU018091  |
| GO_BP_m1GO:009873positive re1/2606  | 5/23843   | 0.439418 | 0.693594 | 0.659533 | Slc9a1    |
| GO_BP_m1GO:009888neurotrans 1/2606  | 5/23843   | 0.439418 | 0.693594 | 0.659533 | Arhgap44  |
| GO_BP_m1GO:009901modificatic1/2606  | 5/23843   | 0.439418 | 0.693594 | 0.659533 | Arhgap44  |
| GO_BP_m1GO:009964axo-dendri1/2606   | 5/23843   | 0.439418 | 0.693594 | 0.659533 | Stau2     |
| GO_BP_m1GO:014005cellular res1/2606 | 5/23843   | 0.439418 | 0.693594 | 0.659533 | Cd36      |
| GO_BP_m1GO:190022negative re1/2606  | 5/23843   | 0.439418 | 0.693594 | 0.659533 | Mefv      |
| GO_BP_m1GO:190082regulation 1/2606  | 5/23843   | 0.439418 | 0.693594 | 0.659533 | Cav3      |
| GO_BP_m1GO:190107negative re1/2606  | 5/23843   | 0.439418 | 0.693594 | 0.659533 | Pde4b     |
| GO_BP_m1GO:190116positive re1/2606  | 5/23843   | 0.439418 | 0.693594 | 0.659533 | Syde1     |
| GO_BP_m1GO:19015C ether biosy1/2606 | 5/23843   | 0.439418 | 0.693594 | 0.659533 | Fasn      |
| GO_BP_m1GO:190167nucleotide 1/2606  | 5/23843   | 0.439418 | 0.693594 | 0.659533 | Slc25a33  |
| GO_BP_m1GO:190226regulation 1/2606  | 5/23843   | 0.439418 | 0.693594 | 0.659533 | Oaz1      |
| GO_BP_m1GO:190247positive re1/2606  | 5/23843   | 0.439418 | 0.693594 | 0.659533 | NIgn3     |
| GO_BP_m1GO:190271negative re1/2606  | 5/23843   | 0.439418 | 0.693594 | 0.659533 | Zc3h12a   |
| GO_BP_m1GO:190307positive re1/2606  | 5/23843   | 0.439418 | 0.693594 | 0.659533 | Bcap31    |
| GO_BP_m1GO:190323melanoson1/2606    | 5/23843   | 0.439418 | 0.693594 | 0.659533 | Rab32     |
| GO_BP_m1GO:190337negative re1/2606  | 5/23843   | 0.439418 | 0.693594 | 0.659533 | Park2     |
| GO_BP_m1GO:190391negative re1/2606  | 5/23843   | 0.439418 | 0.693594 | 0.659533 | Nck2      |
| GO_BP_m1GO:19045C regulation 1/2606 | 5/23843   | 0.439418 | 0.693594 | 0.659533 | Sptlc2    |
| GO_BP_m1GO:19045C positive re1/2606 | 5/23843   | 0.439418 | 0.693594 | 0.659533 | Sptlc2    |
| GO_BP_m1GO:19045C regulation 1/2606 | 5/23843   | 0.439418 | 0.693594 | 0.659533 | Xrcc1     |
| GO_BP_m1GO:19045C negative re1/2606 | 5/23843   | 0.439418 | 0.693594 | 0.659533 | Xrcc1     |
| GO_BP_m1GO:190463response tr1/2606  | 5/23843   | 0.439418 | 0.693594 | 0.659533 | Zc3h12a   |
| GO_BP_m1GO:190463cellular res1/2606 | 5/23843   | 0.439418 | 0.693594 | 0.659533 | Zc3h12a   |
| GO_BP_m1GO:190475positive re1/2606  | 5/23843   | 0.439418 | 0.693594 | 0.659533 | Nmd3      |
| GO_BP_m1GO:190497brush bord1/2606   | 5/23843   | 0.439418 | 0.693594 | 0.659533 | Myo7b     |
| GO_BP_m1GO:190544regulation 1/2606  | 5/23843   | 0.439418 | 0.693594 | 0.659533 | Cdk1      |
| GO_BP_m1GO:190565positive re1/2606  | 5/23843   | 0.439418 | 0.693594 | 0.659533 | Ephb4     |
| GO_BP_m1GO:19057C negative re1/2606 | 5/23843   | 0.439418 | 0.693594 | 0.659533 | Bnip3     |
| GO_BP_m1GO:199044negative re1/2606  | 5/23843   | 0.439418 | 0.693594 | 0.659533 | Nck2      |
| GO_BP_m1GO:199056protein pol1/2606  | 5/23843   | 0.439418 | 0.693594 | 0.659533 | Ddrgk1    |
| GO_BP_m1GO:199059protein K61/2606   | 5/23843   | 0.439418 | 0.693594 | 0.659533 | Ddrgk1    |
| GO_BP_m1GO:200027regulation 1/2606  | 5/23843   | 0.439418 | 0.693594 | 0.659533 | Pm20d1    |
| GO_BP_m1GO:20003C negative re1/2606 | 5/23843   | 0.439418 | 0.693594 | 0.659533 | Fmr1      |
| GO_BP_m1GO:20003E positive re1/2606 | 5/23843   | 0.439418 | 0.693594 | 0.659533 | Wnt3a     |
| GO_BP_m1GO:20004C regulation 1/2606 | 5/23843   | 0.439418 | 0.693594 | 0.659533 | Ripk3     |
| GO_BP_m1GO:20005C regulation 1/2606 | 5/23843   | 0.439418 | 0.693594 | 0.659533 | Ccl4      |
| GO_BP_m1GO:200053regulation 1/2606  | 5/23843   | 0.439418 | 0.693594 | 0.659533 | Cav1      |
| GO_BP_m1GO:200056regulation 1/2606  | 5/23843   | 0.439418 | 0.693594 | 0.659533 | Ptpn22    |
| GO_BP_m1GO:20006C regulation 1/2606 | 5/23843   | 0.439418 | 0.693594 | 0.659533 | Duoxa2    |
| GO_BP_m1GO:200081regulation 1/2606  | 5/23843   | 0.439418 | 0.693594 | 0.659533 | Cfl1      |
| GO_BP_m1GO:200096positive re1/2606  | 5/23843   | 0.439418 | 0.693594 | 0.659533 | NIgn3     |
| GO_BP_m1GO:20011E positive re1/2606 | 5/23843   | 0.439418 | 0.693594 | 0.659533 | Pycard    |
| GO_BP_m1GO:000176morphoge127/2606   | 237/23843 | 0.439966 | 0.694209 | 0.660118 | Adm/Cav3, |

|                   |               |         |           |          |          |          |              |
|-------------------|---------------|---------|-----------|----------|----------|----------|--------------|
| GO_BP_m1GO:004657 | regulation    | 27/2606 | 237/23843 | 0.439966 | 0.694209 | 0.660118 | Abl2/Abra    |
| GO_BP_m1GO:003629 | response to   | 25/2606 | 219/23843 | 0.440364 | 0.694713 | 0.660597 | Abat/Adam    |
| GO_BP_m1GO:000282 | regulation    | 17/2606 | 147/23843 | 0.440941 | 0.694871 | 0.660747 | Aplf/Arg1/   |
| GO_BP_m1GO:000176 | neuron miç    | 20/2606 | 174/23843 | 0.440987 | 0.694871 | 0.660747 | Arx/Cdh1/    |
| GO_BP_m1GO:003510 | appendage     | 20/2606 | 174/23843 | 0.440987 | 0.694871 | 0.660747 | Alx3/Asph/   |
| GO_BP_m1GO:003510 | limb morph    | 20/2606 | 174/23843 | 0.440987 | 0.694871 | 0.660747 | Alx3/Asph/   |
| GO_BP_m1GO:004576 | positive reç  | 20/2606 | 174/23843 | 0.440987 | 0.694871 | 0.660747 | Adm/Angp     |
| GO_BP_m1GO:004688 | positive reç  | 18/2606 | 156/23843 | 0.441006 | 0.694871 | 0.660747 | Abat/Ano1    |
| GO_BP_m1GO:190303 | regulation    | 19/2606 | 165/23843 | 0.441019 | 0.694871 | 0.660747 | Abat/Acta2   |
| GO_BP_m1GO:000702 | negative re   | 4/2606  | 31/23843  | 0.443951 | 0.697864 | 0.663593 | Cib1/Fgf13   |
| GO_BP_m1GO:001056 | regulation    | 4/2606  | 31/23843  | 0.443951 | 0.697864 | 0.663593 | Blm/Fbxo1    |
| GO_BP_m1GO:003206 | regulation    | 4/2606  | 31/23843  | 0.443951 | 0.697864 | 0.663593 | Dffa/Oas1f   |
| GO_BP_m1GO:003246 | positive reç  | 4/2606  | 31/23843  | 0.443951 | 0.697864 | 0.663593 | Cxcr5/Drd3   |
| GO_BP_m1GO:004362 | ncRNA 3' -    | 4/2606  | 31/23843  | 0.443951 | 0.697864 | 0.663593 | Elac1/Eri1/  |
| GO_BP_m1GO:005070 | regulation    | 4/2606  | 31/23843  | 0.443951 | 0.697864 | 0.663593 | Gsdmd/Irf1   |
| GO_BP_m1GO:006097 | coronary v    | 4/2606  | 31/23843  | 0.443951 | 0.697864 | 0.663593 | Fgf1/Smad    |
| GO_BP_m1GO:007052 | protein kin   | 4/2606  | 31/23843  | 0.443951 | 0.697864 | 0.663593 | Dgkq/Fibin   |
| GO_BP_m1GO:009007 | relaxation    | 4/2606  | 31/23843  | 0.443951 | 0.697864 | 0.663593 | Adora1/Ak    |
| GO_BP_m1GO:009021 | positive reç  | 4/2606  | 31/23843  | 0.443951 | 0.697864 | 0.663593 | Epha8/Fpr2   |
| GO_BP_m1GO:009050 | epiboly       | 4/2606  | 31/23843  | 0.443951 | 0.697864 | 0.663593 | Col5a1/Mn    |
| GO_BP_m1GO:200035 | negative re   | 4/2606  | 31/23843  | 0.443951 | 0.697864 | 0.663593 | Abl2/Il10/S  |
| GO_BP_m1GO:200046 | positive reç  | 4/2606  | 31/23843  | 0.443951 | 0.697864 | 0.663593 | Nlgn3/Ssh1   |
| GO_BP_m1GO:000193 | negative re   | 5/2606  | 40/23843  | 0.44753  | 0.702358 | 0.667867 | Atp5a1/Car   |
| GO_BP_m1GO:000315 | regulation    | 5/2606  | 40/23843  | 0.44753  | 0.702358 | 0.667867 | Fgf1/Gdnf/   |
| GO_BP_m1GO:001660 | Rac protei    | 5/2606  | 40/23843  | 0.44753  | 0.702358 | 0.667867 | Arhgap44/    |
| GO_BP_m1GO:003334 | cholesterol   | 5/2606  | 40/23843  | 0.44753  | 0.702358 | 0.667867 | Abca12/Ca    |
| GO_BP_m1GO:003541 | protein loc   | 5/2606  | 40/23843  | 0.44753  | 0.702358 | 0.667867 | Arhgap44/    |
| GO_BP_m1GO:004582 | positive reç  | 5/2606  | 40/23843  | 0.44753  | 0.702358 | 0.667867 | Adm/Avpr1    |
| GO_BP_m1GO:006042 | positive reç  | 5/2606  | 40/23843  | 0.44753  | 0.702358 | 0.667867 | Akap6/Cdk    |
| GO_BP_m1GO:009878 | ncRNA trar    | 5/2606  | 40/23843  | 0.44753  | 0.702358 | 0.667867 | Cd3eap/Ell   |
| GO_BP_m1GO:190027 | regulation    | 5/2606  | 40/23843  | 0.44753  | 0.702358 | 0.667867 | Cpeb3/Gir    |
| GO_BP_m1GO:019873 | cell-cell sig | 47/2606 | 419/23843 | 0.447965 | 0.702916 | 0.668397 | Abl2/Arntl/  |
| GO_BP_m1GO:000762 | locomotor     | 28/2606 | 247/23843 | 0.448655 | 0.703873 | 0.669306 | Abat/Abl2/   |
| GO_BP_m1GO:004858 | developme     | 27/2606 | 238/23843 | 0.449043 | 0.704036 | 0.669462 | Aatk/Akap6   |
| GO_BP_m1GO:000220 | somatic rec   | 6/2606  | 49/23843  | 0.44972  | 0.704036 | 0.669462 | Aplf/Irfng/I |
| GO_BP_m1GO:000220 | somatic div   | 6/2606  | 49/23843  | 0.44972  | 0.704036 | 0.669462 | Aplf/Irfng/I |
| GO_BP_m1GO:003101 | endocrine     | 6/2606  | 49/23843  | 0.44972  | 0.704036 | 0.669462 | Arntl/Clock  |
| GO_BP_m1GO:003248 | positive reç  | 6/2606  | 49/23843  | 0.44972  | 0.704036 | 0.669462 | Dhx58/Mb     |
| GO_BP_m1GO:003264 | regulation    | 6/2606  | 49/23843  | 0.44972  | 0.704036 | 0.669462 | Cactin/Nm    |
| GO_BP_m1GO:004405 | regulation    | 6/2606  | 49/23843  | 0.44972  | 0.704036 | 0.669462 | Abcb1a/Dc    |
| GO_BP_m1GO:004519 | isotype swi   | 6/2606  | 49/23843  | 0.44972  | 0.704036 | 0.669462 | Aplf/Irfng/I |
| GO_BP_m1GO:005077 | positive reç  | 6/2606  | 49/23843  | 0.44972  | 0.704036 | 0.669462 | Ache/Capri   |
| GO_BP_m1GO:005114 | negative re   | 6/2606  | 49/23843  | 0.44972  | 0.704036 | 0.669462 | Cav3/Cxcl1   |
| GO_BP_m1GO:005149 | positive reç  | 6/2606  | 49/23843  | 0.44972  | 0.704036 | 0.669462 | Ctgf/Itg1k   |
| GO_BP_m1GO:200067 | regulation    | 6/2606  | 49/23843  | 0.44972  | 0.704036 | 0.669462 | Ddrgk1/Fo    |
| GO_BP_m1GO:003027 | regulation    | 25/2606 | 220/23843 | 0.449806 | 0.704044 | 0.66947  | Ank/Bglap3   |
| GO_BP_m1GO:005066 | cytokine se   | 24/2606 | 211/23843 | 0.450179 | 0.704377 | 0.669786 | Abl2/Btnl2,  |
| GO_BP_m1GO:190332 | regulation    | 24/2606 | 211/23843 | 0.450179 | 0.704377 | 0.669786 | 5730559C1    |

|                                                          |           |          |          |          |              |
|----------------------------------------------------------|-----------|----------|----------|----------|--------------|
| GO_BP_m1GO:000201morphogen 7/2606                        | 58/23843  | 0.451122 | 0.705349 | 0.670711 | Col5a1/Dlk   |
| GO_BP_m1GO:000644regulation 7/2606                       | 58/23843  | 0.451122 | 0.705349 | 0.670711 | Eif2ak1/Eif2 |
| GO_BP_m1GO:004277mitochondrion 7/2606                    | 58/23843  | 0.451122 | 0.705349 | 0.670711 | Cdk1/Coq9    |
| GO_BP_m1GO:005071negative regulation 7/2606              | 58/23843  | 0.451122 | 0.705349 | 0.670711 | C1qtnf3/Ezr  |
| GO_BP_m1GO:000602proteoglycan 8/2606                     | 67/23843  | 0.45203  | 0.705922 | 0.671256 | Chst13/Csc3  |
| GO_BP_m1GO:000704cell-substrate adhesion 8/2606          | 67/23843  | 0.45203  | 0.705922 | 0.671256 | Bcas3/Cfl1   |
| GO_BP_m1GO:004566positive regulation 8/2606              | 67/23843  | 0.45203  | 0.705922 | 0.671256 | Clic1/Cthrc  |
| GO_BP_m1GO:004804focal adhesion 8/2606                   | 67/23843  | 0.45203  | 0.705922 | 0.671256 | Bcas3/Cfl1   |
| GO_BP_m1GO:000756female pregnancy 18/2606                | 157/23843 | 0.45219  | 0.705922 | 0.671256 | Arhgdib/Atf  |
| GO_BP_m1GO:000597glycogen storage 9/2606                 | 76/23843  | 0.452609 | 0.705922 | 0.671256 | Esrrb/Gys1   |
| GO_BP_m1GO:000607cellular glucose transport 9/2606       | 76/23843  | 0.452609 | 0.705922 | 0.671256 | Esrrb/Gys1   |
| GO_BP_m1GO:004404glucan metabolism 9/2606                | 76/23843  | 0.452609 | 0.705922 | 0.671256 | Esrrb/Gys1   |
| GO_BP_m1GO:005196positive regulation 9/2606              | 76/23843  | 0.452609 | 0.705922 | 0.671256 | Ephb1/Eph    |
| GO_BP_m1GO:000766visual perception 16/2606               | 139/23843 | 0.452704 | 0.705922 | 0.671256 | Bbs2/Cacnl   |
| GO_BP_m1GO:190396regulation 16/2606                      | 139/23843 | 0.452704 | 0.705922 | 0.671256 | Eif2ak2/Fkfb |
| GO_BP_m1GO:002195central nervous system 10/2606          | 85/23843  | 0.45296  | 0.705922 | 0.671256 | Arx/Btg2/C   |
| GO_BP_m1GO:002296electron transport 10/2606              | 85/23843  | 0.45296  | 0.705922 | 0.671256 | Cdk1/Coq9    |
| GO_BP_m1GO:004353regulation 10/2606                      | 85/23843  | 0.45296  | 0.705922 | 0.671256 | Atp5a1/Cit   |
| GO_BP_m1GO:004598positive regulation 10/2606             | 85/23843  | 0.45296  | 0.705922 | 0.671256 | Adm/Calcr    |
| GO_BP_m1GO:007066negative regulation 10/2606             | 85/23843  | 0.45296  | 0.705922 | 0.671256 | Arg1/Cd80    |
| GO_BP_m1GO:190054positive regulation 10/2606             | 85/23843  | 0.45296  | 0.705922 | 0.671256 | Adm/Calcr    |
| GO_BP_m1GO:001489muscle hypertrophy 11/2606              | 94/23843  | 0.453145 | 0.705922 | 0.671256 | Adk/Akap6    |
| GO_BP_m1GO:005196regulation 11/2606                      | 94/23843  | 0.453145 | 0.705922 | 0.671256 | Epha7/Eph    |
| GO_BP_m1GO:003433adherens junction 13/2606               | 112/23843 | 0.453176 | 0.705922 | 0.671256 | 5730559C1    |
| GO_BP_m1GO:005082defense response 13/2606                | 112/23843 | 0.453176 | 0.705922 | 0.671256 | 1700016DC    |
| GO_BP_m1GO:003433cell junction 26/2606                   | 230/23843 | 0.45868  | 0.713839 | 0.678784 | 5730559C1    |
| GO_BP_m1GO:009006positive regulation 26/2606             | 230/23843 | 0.45868  | 0.713839 | 0.678784 | Cdc25a/Cd    |
| GO_BP_m1GO:000639mRNA processing 49/2606                 | 439/23843 | 0.460477 | 0.713839 | 0.678784 | Virma/Apo    |
| GO_BP_m1GO:004218cellular ketone body production 21/2606 | 185/23843 | 0.461566 | 0.713839 | 0.678784 | Akr1c12/At   |
| GO_BP_m1GO:000047endonucleolytic activity 2/2606         | 14/23843  | 0.462403 | 0.713839 | 0.678784 | Bms1/Kri1    |
| GO_BP_m1GO:000167acrosome 2/2606                         | 14/23843  | 0.462403 | 0.713839 | 0.678784 | Ccdc136/P    |
| GO_BP_m1GO:000333keratinocyte 2/2606                     | 14/23843  | 0.462403 | 0.713839 | 0.678784 | Flnb/Fosl2   |
| GO_BP_m1GO:000610oxaloacetate 2/2606                     | 14/23843  | 0.462403 | 0.713839 | 0.678784 | Got1/Pcx     |
| GO_BP_m1GO:000619cAMP catalytic activity 2/2606          | 14/23843  | 0.462403 | 0.713839 | 0.678784 | Pde11a/Pd    |
| GO_BP_m1GO:000654glycine metabolism 2/2606               | 14/23843  | 0.462403 | 0.713839 | 0.678784 | Gldc/Shmt    |
| GO_BP_m1GO:000718SMAD protein 2/2606                     | 14/23843  | 0.462403 | 0.713839 | 0.678784 | Smad6/Zfy    |
| GO_BP_m1GO:000921purine de novo biosynthesis 2/2606      | 14/23843  | 0.462403 | 0.713839 | 0.678784 | Adk/Nudt1    |
| GO_BP_m1GO:000926deoxyribonucleic acid 2/2606            | 14/23843  | 0.462403 | 0.713839 | 0.678784 | Adk/Shmt1    |
| GO_BP_m1GO:001042hydrogen peroxide 2/2606                | 14/23843  | 0.462403 | 0.713839 | 0.678784 | Endog/Hsp    |
| GO_BP_m1GO:001089regulation 2/2606                       | 14/23843  | 0.462403 | 0.713839 | 0.678784 | Plin5/Pnpl   |
| GO_BP_m1GO:001404positive regulation 2/2606              | 14/23843  | 0.462403 | 0.713839 | 0.678784 | Avpr1a/Gri   |
| GO_BP_m1GO:001654protein autophagy 2/2606                | 14/23843  | 0.462403 | 0.713839 | 0.678784 | Ctsl/Pcsk9   |
| GO_BP_m1GO:001811peptidyl-cleavage 2/2606                | 14/23843  | 0.462403 | 0.713839 | 0.678784 | Adh5/Atp2    |
| GO_BP_m1GO:001988antigen presentation 2/2606             | 14/23843  | 0.462403 | 0.713839 | 0.678784 | H2-DMb2/     |
| GO_BP_m1GO:002152spinal cord 2/2606                      | 14/23843  | 0.462403 | 0.713839 | 0.678784 | Pax3/Wnt3    |
| GO_BP_m1GO:003081negative regulation 2/2606              | 14/23843  | 0.462403 | 0.713839 | 0.678784 | Ppargc1a/1   |
| GO_BP_m1GO:003278negative regulation 2/2606              | 14/23843  | 0.462403 | 0.713839 | 0.678784 | Nelfb/Supt   |
| GO_BP_m1GO:003312regulation 2/2606                       | 14/23843  | 0.462403 | 0.713839 | 0.678784 | Fmr1/H2af    |

|                                       |           |          |          |          |              |
|---------------------------------------|-----------|----------|----------|----------|--------------|
| GO_BP_m1GO:003572cellular res 2/2606  | 14/23843  | 0.462403 | 0.713839 | 0.678784 | Bcar1/Il10   |
| GO_BP_m1GO:00359εchondrocyt2/2606     | 14/23843  | 0.462403 | 0.713839 | 0.678784 | Ctgf/Mmp1    |
| GO_BP_m1GO:003637sodium ion2/2606     | 14/23843  | 0.462403 | 0.713839 | 0.678784 | Atp1b2/Fxy   |
| GO_BP_m1GO:004292glucocortic2/2606    | 14/23843  | 0.462403 | 0.713839 | 0.678784 | Arntl/Clock  |
| GO_BP_m1GO:004324proteasom2/2606      | 14/23843  | 0.462403 | 0.713839 | 0.678784 | Psmd8/Psn    |
| GO_BP_m1GO:004364dicarboxyli2/2606    | 14/23843  | 0.462403 | 0.713839 | 0.678784 | Ddo/Got1     |
| GO_BP_m1GO:004424lipid digest2/2606   | 14/23843  | 0.462403 | 0.713839 | 0.678784 | Arx/Cd36     |
| GO_BP_m1GO:00451εregulation 2/2606    | 14/23843  | 0.462403 | 0.713839 | 0.678784 | Adora1/Kci   |
| GO_BP_m1GO:004561positive reç2/2606   | 14/23843  | 0.462403 | 0.713839 | 0.678784 | Foxc1/H2a    |
| GO_BP_m1GO:00457εnegative re2/2606    | 14/23843  | 0.462403 | 0.713839 | 0.678784 | Cav3/Cfl1    |
| GO_BP_m1GO:004867positive reç2/2606   | 14/23843  | 0.462403 | 0.713839 | 0.678784 | Ntf5/Wnt3:   |
| GO_BP_m1GO:00486εnegative re2/2606    | 14/23843  | 0.462403 | 0.713839 | 0.678784 | Klk8/Xylt1   |
| GO_BP_m1GO:005171positive reç2/2606   | 14/23843  | 0.462403 | 0.713839 | 0.678784 | Arg1/lfng    |
| GO_BP_m1GO:00601εfemale mat2/2606     | 14/23843  | 0.462403 | 0.713839 | 0.678784 | Avpr1a/Drc   |
| GO_BP_m1GO:006062regulation 2/2606    | 14/23843  | 0.462403 | 0.713839 | 0.678784 | Preb/Scfd1   |
| GO_BP_m1GO:006154ganglion d2/2606     | 14/23843  | 0.462403 | 0.713839 | 0.678784 | Sema3f/Tu    |
| GO_BP_m1GO:007007proton-tra2/2606     | 14/23843  | 0.462403 | 0.713839 | 0.678784 | Atpaf1/Tcir  |
| GO_BP_m1GO:00704εleukocyte ε2/2606    | 14/23843  | 0.462403 | 0.713839 | 0.678784 | Adam8/Ha     |
| GO_BP_m1GO:00718εmitotic cell2/2606   | 14/23843  | 0.462403 | 0.713839 | 0.678784 | Cdkn1a/Pn    |
| GO_BP_m1GO:009014positive reç2/2606   | 14/23843  | 0.462403 | 0.713839 | 0.678784 | Bnip3/Dcn    |
| GO_BP_m1GO:00901εchemokine2/2606      | 14/23843  | 0.462403 | 0.713839 | 0.678784 | Il1rl1/Pycar |
| GO_BP_m1GO:00971εGABAergic2/2606      | 14/23843  | 0.462403 | 0.713839 | 0.678784 | Arx/Rac3     |
| GO_BP_m1GO:00974εprogramm2/2606       | 14/23843  | 0.462403 | 0.713839 | 0.678784 | Endog/Hsp    |
| GO_BP_m1GO:009871sodium ion2/2606     | 14/23843  | 0.462403 | 0.713839 | 0.678784 | Slc9a1/Slcε  |
| GO_BP_m1GO:00988εintestinal liq2/2606 | 14/23843  | 0.462403 | 0.713839 | 0.678784 | Cd36/Dgat    |
| GO_BP_m1GO:19034εnegative re2/2606    | 14/23843  | 0.462403 | 0.713839 | 0.678784 | Ednrb/Npr:   |
| GO_BP_m1GO:190474regulation 2/2606    | 14/23843  | 0.462403 | 0.713839 | 0.678784 | Foxc1/Wt1    |
| GO_BP_m1GO:20003εregulation 2/2606    | 14/23843  | 0.462403 | 0.713839 | 0.678784 | Dnajc6/Sm    |
| GO_BP_m1GO:000091cytokinesis19/2606   | 167/23843 | 0.462758 | 0.714137 | 0.679067 | Ahctf1/Ank   |
| GO_BP_m1GO:000974response tr19/2606   | 167/23843 | 0.462758 | 0.714137 | 0.679067 | Ano1/Casp    |
| GO_BP_m1GO:00510εregulation 30/2606   | 267/23843 | 0.465072 | 0.717172 | 0.681952 | Abl2/Abra/   |
| GO_BP_m1GO:003572sodium ion13/2606    | 113/23843 | 0.4664   | 0.717172 | 0.681952 | Atp1b2/Atq   |
| GO_BP_m1GO:00508εT cell receç13/2606  | 113/23843 | 0.4664   | 0.717172 | 0.681952 | Btnl2/Dusp   |
| GO_BP_m1GO:000272regulation 3/2606    | 23/23843  | 0.467358 | 0.717172 | 0.681952 | Arg1/Sashε   |
| GO_BP_m1GO:000702microtubul3/2606     | 23/23843  | 0.467358 | 0.717172 | 0.681952 | Tubg1/Tub    |
| GO_BP_m1GO:00190εvirion asser3/2606   | 23/23843  | 0.467358 | 0.717172 | 0.681952 | Chmp1b/P     |
| GO_BP_m1GO:00309Cnotochord 3/2606     | 23/23843  | 0.467358 | 0.717172 | 0.681952 | Epha2/Noç    |
| GO_BP_m1GO:00323εpositive reç3/2606   | 23/23843  | 0.467358 | 0.717172 | 0.681952 | lfng/Por/Pç  |
| GO_BP_m1GO:00343εsmooth mt3/2606      | 23/23843  | 0.467358 | 0.717172 | 0.681952 | E2f3/lfng/ll |
| GO_BP_m1GO:00343εregulation 3/2606    | 23/23843  | 0.467358 | 0.717172 | 0.681952 | E2f3/lfng/ll |
| GO_BP_m1GO:00424Cthyroid hor3/2606    | 23/23843  | 0.467358 | 0.717172 | 0.681952 | Dio2/Duox    |
| GO_BP_m1GO:00425εhyperosmc3/2606      | 23/23843  | 0.467358 | 0.717172 | 0.681952 | Mir7b/Mirε   |
| GO_BP_m1GO:00484εsympatheti3/2606     | 23/23843  | 0.467358 | 0.717172 | 0.681952 | Gdnf/Nf1/ε   |
| GO_BP_m1GO:00513Cmeiotic chr3/2606    | 23/23843  | 0.467358 | 0.717172 | 0.681952 | Cenpx/Sycç   |
| GO_BP_m1GO:00514εmaintenanç3/2606     | 23/23843  | 0.467358 | 0.717172 | 0.681952 | Cdk5/Ciz1/   |
| GO_BP_m1GO:007127cellular resç3/2606  | 23/23843  | 0.467358 | 0.717172 | 0.681952 | Gsn/Mt2/M    |
| GO_BP_m1GO:007131cellular resç3/2606  | 23/23843  | 0.467358 | 0.717172 | 0.681952 | Blm/Casp6    |
| GO_BP_m1GO:007147cellular resç3/2606  | 23/23843  | 0.467358 | 0.717172 | 0.681952 | Mir7b/Mirε   |

|                                       |           |          |          |          |              |
|---------------------------------------|-----------|----------|----------|----------|--------------|
| GO_BP_m1GO:014011extracellula3/2606   | 23/23843  | 0.467358 | 0.717172 | 0.681952 | Arrdc4/Par   |
| GO_BP_m1GO:014011export acrc3/2606    | 23/23843  | 0.467358 | 0.717172 | 0.681952 | Atp1b2/Fxy   |
| GO_BP_m1GO:004592positive reç11/2606  | 95/23843  | 0.467579 | 0.717172 | 0.681952 | Catsper3/C   |
| GO_BP_m1GO:00487C oligodendr 11/2606  | 95/23843  | 0.467579 | 0.717172 | 0.681952 | Cdk5/Drd3    |
| GO_BP_m1GO:004227ribosomal :9/2606    | 77/23843  | 0.468659 | 0.717172 | 0.681952 | Bms1/Eral1   |
| GO_BP_m1GO:006011inner ear re9/2606   | 77/23843  | 0.468659 | 0.717172 | 0.681952 | Atp8b1/Ctl   |
| GO_BP_m1GO:006097coronary v:9/2606    | 77/23843  | 0.468659 | 0.717172 | 0.681952 | Cfc1/Cntrl/  |
| GO_BP_m1GO:000041protein peı4/2606    | 32/23843  | 0.469069 | 0.717172 | 0.681952 | Fkbp11/Fkl   |
| GO_BP_m1GO:00069E ER-nucleus4/2606    | 32/23843  | 0.469069 | 0.717172 | 0.681952 | Atg10/Bok    |
| GO_BP_m1GO:00092E deoxyribor4/2606    | 32/23843  | 0.469069 | 0.717172 | 0.681952 | Adk/Dera/l   |
| GO_BP_m1GO:001004response tr4/2606    | 32/23843  | 0.469069 | 0.717172 | 0.681952 | Hvcn1/Mt2    |
| GO_BP_m1GO:001937epoxygena4/2606      | 32/23843  | 0.469069 | 0.717172 | 0.681952 | Cyp2b10/C    |
| GO_BP_m1GO:003221positive reç4/2606   | 32/23843  | 0.469069 | 0.717172 | 0.681952 | Atr/Cct3/H   |
| GO_BP_m1GO:00327E positive reç4/2606  | 32/23843  | 0.469069 | 0.717172 | 0.681952 | 5730559C1    |
| GO_BP_m1GO:00350E response tr4/2606   | 32/23843  | 0.469069 | 0.717172 | 0.681952 | Abat/Chrne   |
| GO_BP_m1GO:00358E enteroendr4/2606    | 32/23843  | 0.469069 | 0.717172 | 0.681952 | Arntl/Clock  |
| GO_BP_m1GO:004481mitotic G2/4/2606    | 32/23843  | 0.469069 | 0.717172 | 0.681952 | Blm/Ccng1    |
| GO_BP_m1GO:004557regulation 4/2606    | 32/23843  | 0.469069 | 0.717172 | 0.681952 | Il2rg/Mmp    |
| GO_BP_m1GO:00486E collateral sı4/2606 | 32/23843  | 0.469069 | 0.717172 | 0.681952 | Epha7/Fgf1   |
| GO_BP_m1GO:00511E cofactor trı4/2606  | 32/23843  | 0.469069 | 0.717172 | 0.681952 | Folr2/Gif/P  |
| GO_BP_m1GO:00602E regulation 4/2606   | 32/23843  | 0.469069 | 0.717172 | 0.681952 | Idh2/Ifng/M  |
| GO_BP_m1GO:00606E embryonic 4/2606    | 32/23843  | 0.469069 | 0.717172 | 0.681952 | Adm/Cdkn     |
| GO_BP_m1GO:190211negative re4/2606    | 32/23843  | 0.469069 | 0.717172 | 0.681952 | Cav3/Kat2a   |
| GO_BP_m1GO:00425C regulation 8/2606   | 68/23843  | 0.469123 | 0.717172 | 0.681952 | Cav1/Hdac    |
| GO_BP_m1GO:004584negative re8/2606    | 68/23843  | 0.469123 | 0.717172 | 0.681952 | Cav3/Ephb    |
| GO_BP_m1GO:000271regulation 7/2606    | 59/23843  | 0.469492 | 0.717172 | 0.681952 | Aplf/Ifng/Il |
| GO_BP_m1GO:00028E regulation 7/2606   | 59/23843  | 0.469492 | 0.717172 | 0.681952 | Aplf/Ifng/Il |
| GO_BP_m1GO:00609E endocrine l7/2606   | 59/23843  | 0.469492 | 0.717172 | 0.681952 | C1qtnf3/Cr   |
| GO_BP_m1GO:00019E positive reç5/2606  | 41/23843  | 0.469646 | 0.717172 | 0.681952 | Il7/Mmp12    |
| GO_BP_m1GO:00140C glial cell pr5/2606 | 41/23843  | 0.469646 | 0.717172 | 0.681952 | Idh2/Ifng/L  |
| GO_BP_m1GO:003281regulation 5/2606    | 41/23843  | 0.469646 | 0.717172 | 0.681952 | Il12b/Ptpn2  |
| GO_BP_m1GO:00454E photoreceı5/2606    | 41/23843  | 0.469646 | 0.717172 | 0.681952 | Bbs10/Bbs1   |
| GO_BP_m1GO:00466E positive reç5/2606  | 41/23843  | 0.469646 | 0.717172 | 0.681952 | Ifng/Il2rg/M |
| GO_BP_m1GO:005097detection c5/2606    | 41/23843  | 0.469646 | 0.717172 | 0.681952 | Grin2b/Htr   |
| GO_BP_m1GO:00610E establishmı5/2606   | 41/23843  | 0.469646 | 0.717172 | 0.681952 | Cldn1/Ezr/   |
| GO_BP_m1GO:00311E mRNA 3'-e6/2606     | 50/23843  | 0.469705 | 0.717172 | 0.681952 | Cpeb3/Cps    |
| GO_BP_m1GO:00323E regulation 6/2606   | 50/23843  | 0.469705 | 0.717172 | 0.681952 | Dgkq/Duo     |
| GO_BP_m1GO:003517social beha6/2606    | 50/23843  | 0.469705 | 0.717172 | 0.681952 | Avpr1a/Gn    |
| GO_BP_m1GO:00353C positive reç6/2606  | 50/23843  | 0.469705 | 0.717172 | 0.681952 | Adora1/Ak    |
| GO_BP_m1GO:00354E response tr6/2606   | 50/23843  | 0.469705 | 0.717172 | 0.681952 | Gm12185/l    |
| GO_BP_m1GO:00487C embryonic 6/2606    | 50/23843  | 0.469705 | 0.717172 | 0.681952 | Alx3/Mmp1    |
| GO_BP_m1GO:00517C intraspecie 6/2606  | 50/23843  | 0.469705 | 0.717172 | 0.681952 | Avpr1a/Gn    |
| GO_BP_m1GO:00702E negative re6/2606   | 50/23843  | 0.469705 | 0.717172 | 0.681952 | Blm/Dock8    |
| GO_BP_m1GO:00457E positive reç23/2606 | 204/23843 | 0.470236 | 0.717858 | 0.682605 | Adam8/Ari    |
| GO_BP_m1GO:00080E cell recogn 30/2606 | 268/23843 | 0.473666 | 0.721602 | 0.686165 | Cadm1/Cct    |
| GO_BP_m1GO:000281regulation 18/2606   | 159/23843 | 0.474512 | 0.721602 | 0.686165 | Aplf/Arg1/l  |
| GO_BP_m1GO:00075E blood coaç 18/2606  | 159/23843 | 0.474512 | 0.721602 | 0.686165 | Abat/Alox1   |
| GO_BP_m1GO:00083E regulation 18/2606  | 159/23843 | 0.474512 | 0.721602 | 0.686165 | Arhgef18/E   |



|                   |                      |           |           |          |          |          |              |
|-------------------|----------------------|-----------|-----------|----------|----------|----------|--------------|
| GO_BP_m1GO:000864 | carbohydrate         | 18/2606   | 159/23843 | 0.474512 | 0.721602 | 0.686165 | Abcb1a/Ac    |
| GO_BP_m1GO:190210 | positive regulation  | 18/2606   | 159/23843 | 0.474512 | 0.721602 | 0.686165 | Adam8/Ca     |
| GO_BP_m1GO:001097 | transport            | 16/2606   | 141/23843 | 0.47642  | 0.721602 | 0.686165 | Bloc1s5/Cc   |
| GO_BP_m1GO:009911 | microtubule          | 16/2606   | 141/23843 | 0.47642  | 0.721602 | 0.686165 | Bloc1s5/Cc   |
| GO_BP_m1GO:000985 | determination        | 15/2606   | 132/23843 | 0.477428 | 0.721602 | 0.686165 | Cc2d2a/Cf    |
| GO_BP_m1GO:003121 | biomineral           | 15/2606   | 132/23843 | 0.477428 | 0.721602 | 0.686165 | Ambn/Ank     |
| GO_BP_m1GO:006104 | regulation           | 15/2606   | 132/23843 | 0.477428 | 0.721602 | 0.686165 | Abat/Acta2   |
| GO_BP_m1GO:000736 | determination        | 14/2606   | 123/23843 | 0.478479 | 0.721602 | 0.686165 | Cc2d2a/Cf    |
| GO_BP_m1GO:004856 | digestive tract      | 14/2606   | 123/23843 | 0.478479 | 0.721602 | 0.686165 | Cdh1/Cfc1    |
| GO_BP_m1GO:001082 | regulation           | 22/2606   | 196/23843 | 0.481092 | 0.721602 | 0.686165 | Arih2/Bnip   |
| GO_BP_m1GO:000245 | T cell mediated      | 11/2606   | 96/23843  | 0.481947 | 0.721602 | 0.686165 | Arg1/Clec4   |
| GO_BP_m1GO:000225 | activation           | 54/2606   | 488/23843 | 0.483193 | 0.721602 | 0.686165 | 5730559C1    |
| GO_BP_m1GO:003112 | RNA 3'-end           | 10/2606   | 87/23843  | 0.483237 | 0.721602 | 0.686165 | Cpeb3/Cps    |
| GO_BP_m1GO:000226 | myeloid cell         | 19/2606   | 169/23843 | 0.484426 | 0.721602 | 0.686165 | Bpgm/Hca     |
| GO_BP_m1GO:000859 | regulation           | 9/2606    | 78/23843  | 0.484613 | 0.721602 | 0.686165 | Dll4/Enho    |
| GO_BP_m1GO:002202 | telencephalon        | 8/2606    | 69/23843  | 0.486095 | 0.721602 | 0.686165 | Arx/Cdk5/F   |
| GO_BP_m1GO:004213 | negative regulation  | 8/2606    | 69/23843  | 0.486095 | 0.721602 | 0.686165 | Arg1/Cd80    |
| GO_BP_m1GO:004355 | ear development      | 26/2606   | 233/23843 | 0.486384 | 0.721602 | 0.686165 | Aldh1a3/Ai   |
| GO_BP_m1GO:000704 | lysosome             | 7/2606    | 60/23843  | 0.487707 | 0.721602 | 0.686165 | Atp6v0c/Cl   |
| GO_BP_m1GO:005505 | anion homeostasis    | 7/2606    | 60/23843  | 0.487707 | 0.721602 | 0.686165 | Angptl3/Dc   |
| GO_BP_m1GO:007005 | intrinsic apoptosis  | 7/2606    | 60/23843  | 0.487707 | 0.721602 | 0.686165 | Aifm1/Bok    |
| GO_BP_m1GO:008017 | lytic vacuole        | 7/2606    | 60/23843  | 0.487707 | 0.721602 | 0.686165 | Atp6v0c/Cl   |
| GO_BP_m1GO:000197 | blood vessel         | 6/2606    | 51/23843  | 0.489483 | 0.721602 | 0.686165 | Bcr/Dll4/Fc  |
| GO_BP_m1GO:003272 | negative regulation  | 6/2606    | 51/23843  | 0.489483 | 0.721602 | 0.686165 | Cactin/Gpr   |
| GO_BP_m1GO:004573 | positive regulation  | 6/2606    | 51/23843  | 0.489483 | 0.721602 | 0.686165 | Blm/Baban    |
| GO_BP_m1GO:000979 | specification        | 15/2606   | 133/23843 | 0.489627 | 0.721602 | 0.686165 | Cc2d2a/Cf    |
| GO_BP_m1GO:001607 | snRNA                | met5/2606 | 42/23843  | 0.491475 | 0.721602 | 0.686165 | Ell2/Exosc9  |
| GO_BP_m1GO:003195 | regulation           | 5/2606    | 42/23843  | 0.491475 | 0.721602 | 0.686165 | Cav1/Epha    |
| GO_BP_m1GO:005164 | mitochondrion        | 5/2606    | 42/23843  | 0.491475 | 0.721602 | 0.686165 | Kat2a/Ogt    |
| GO_BP_m1GO:006014 | regulation           | 5/2606    | 42/23843  | 0.491475 | 0.721602 | 0.686165 | Fmr1/Mael    |
| GO_BP_m1GO:006096 | regulation           | 5/2606    | 42/23843  | 0.491475 | 0.721602 | 0.686165 | Fmr1/Mael    |
| GO_BP_m1GO:190372 | positive regulation  | 5/2606    | 42/23843  | 0.491475 | 0.721602 | 0.686165 | Epha8/Fpr2   |
| GO_BP_m1GO:000188 | liver development    | 13/2606   | 115/23843 | 0.492697 | 0.721602 | 0.686165 | Cadm1/Cfc    |
| GO_BP_m1GO:004568 | negative regulation  | 4/2606    | 33/23843  | 0.493757 | 0.721602 | 0.686165 | Drd3/Mbd     |
| GO_BP_m1GO:004574 | negative regulation  | 4/2606    | 33/23843  | 0.493757 | 0.721602 | 0.686165 | Dll4/Kctd10  |
| GO_BP_m1GO:004594 | positive regulation  | 4/2606    | 33/23843  | 0.493757 | 0.721602 | 0.686165 | Fgf1/Ifng/F  |
| GO_BP_m1GO:006033 | type I interferon    | 4/2606    | 33/23843  | 0.493757 | 0.721602 | 0.686165 | Cactin/Ifitr |
| GO_BP_m1GO:006146 | protein localization | 4/2606    | 33/23843  | 0.493757 | 0.721602 | 0.686165 | Cacng5/Ca    |
| GO_BP_m1GO:007135 | cellular response    | 4/2606    | 33/23843  | 0.493757 | 0.721602 | 0.686165 | Cactin/Ifitr |
| GO_BP_m1GO:200024 | regulation           | 4/2606    | 33/23843  | 0.493757 | 0.721602 | 0.686165 | Arhgdib/Bc   |
| GO_BP_m1GO:000974 | response to          | 19/2606   | 170/23843 | 0.495214 | 0.721602 | 0.686165 | Ano1/Casp    |
| GO_BP_m1GO:000635 | DNA-templated        | 11/2606   | 97/23843  | 0.496234 | 0.721602 | 0.686165 | Bclaf1/Can   |
| GO_BP_m1GO:190307 | regulation           | 11/2606   | 97/23843  | 0.496234 | 0.721602 | 0.686165 | Appl1/Carr   |
| GO_BP_m1GO:000233 | mature B cell        | 3/2606    | 24/23843  | 0.496436 | 0.721602 | 0.686165 | Cmtm7/Dc     |
| GO_BP_m1GO:000630 | postreplicative      | 3/2606    | 24/23843  | 0.496436 | 0.721602 | 0.686165 | Pcna/Polh    |
| GO_BP_m1GO:000720 | protein kinase       | 3/2606    | 24/23843  | 0.496436 | 0.721602 | 0.686165 | Dgkh/Dgkc    |
| GO_BP_m1GO:002188 | olfactory bulb       | 3/2606    | 24/23843  | 0.496436 | 0.721602 | 0.686165 | Arx/Mir141   |
| GO_BP_m1GO:003072 | ovulation            | 3/2606    | 24/23843  | 0.496436 | 0.721602 | 0.686165 | Adamts1/L    |

|                  |              |         |           |          |          |          |             |
|------------------|--------------|---------|-----------|----------|----------|----------|-------------|
| GO_BP_m1GO:00509 | positive re  | 3/2606  | 24/23843  | 0.496436 | 0.721602 | 0.686165 | Angptl3/Pli |
| GO_BP_m1GO:00517 | nitric-oxid  | 3/2606  | 24/23843  | 0.496436 | 0.721602 | 0.686165 | Ccl20/Fnta  |
| GO_BP_m1GO:00517 | regulation   | 3/2606  | 24/23843  | 0.496436 | 0.721602 | 0.686165 | Ccl20/Fnta  |
| GO_BP_m1GO:00600 | reflex       | 3/2606  | 24/23843  | 0.496436 | 0.721602 | 0.686165 | Aldh1a3/D   |
| GO_BP_m1GO:00610 | positive re  | 3/2606  | 24/23843  | 0.496436 | 0.721602 | 0.686165 | Caprin2/Pa  |
| GO_BP_m1GO:00614 | establishe   | 3/2606  | 24/23843  | 0.496436 | 0.721602 | 0.686165 | Abca12/Alc  |
| GO_BP_m1GO:00713 | cellular res | 3/2606  | 24/23843  | 0.496436 | 0.721602 | 0.686165 | Crhbp/H2a   |
| GO_BP_m1GO:00715 | zinc ion tra | 3/2606  | 24/23843  | 0.496436 | 0.721602 | 0.686165 | Slc30a3/Slc |
| GO_BP_m1GO:00725 | liver morpt  | 3/2606  | 24/23843  | 0.496436 | 0.721602 | 0.686165 | lfng/Tet2/V |
| GO_BP_m1GO:00971 | amelogene    | 3/2606  | 24/23843  | 0.496436 | 0.721602 | 0.686165 | Itga6/Perp, |
| GO_BP_m1GO:19035 | negative re  | 3/2606  | 24/23843  | 0.496436 | 0.721602 | 0.686165 | Fln/Pparg   |
| GO_BP_m1GO:19042 | regulation   | 3/2606  | 24/23843  | 0.496436 | 0.721602 | 0.686165 | Bcap31/Tr   |
| GO_BP_m1GO:19046 | cellular res | 3/2606  | 24/23843  | 0.496436 | 0.721602 | 0.686165 | Cd36/Cdk5   |
| GO_BP_m1GO:20007 | positive re  | 3/2606  | 24/23843  | 0.496436 | 0.721602 | 0.686165 | Akap6/Nrg   |
| GO_BP_m1GO:20007 | negative re  | 3/2606  | 24/23843  | 0.496436 | 0.721602 | 0.686165 | Esrrb/Jag1/ |
| GO_BP_m1GO:00075 | hemostasis   | 18/2606 | 161/23843 | 0.496716 | 0.721602 | 0.686165 | Abat/Alox1  |
| GO_BP_m1GO:00510 | positive re  | 25/2606 | 225/23843 | 0.496884 | 0.721602 | 0.686165 | Abra/Adan   |
| GO_BP_m1GO:00313 | regulation   | 10/2606 | 88/23843  | 0.498238 | 0.721602 | 0.686165 | Arg1/Cadn   |
| GO_BP_m1GO:00182 | peptidyl-ly  | 37/2606 | 335/23843 | 0.499147 | 0.721602 | 0.686165 | Ash2l/Brpf  |
| GO_BP_m1GO:00019 | renal syste  | 2/2606  | 15/23843  | 0.499558 | 0.721602 | 0.686165 | Adora1/Uts  |
| GO_BP_m1GO:00026 | negative re  | 2/2606  | 15/23843  | 0.499558 | 0.721602 | 0.686165 | Ddt/Gpr18   |
| GO_BP_m1GO:00027 | regulation   | 2/2606  | 15/23843  | 0.499558 | 0.721602 | 0.686165 | Il10/Kars   |
| GO_BP_m1GO:00067 | glucocortic  | 2/2606  | 15/23843  | 0.499558 | 0.721602 | 0.686165 | Dgkq/Hsd1   |
| GO_BP_m1GO:00069 | activation-  | 2/2606  | 15/23843  | 0.499558 | 0.721602 | 0.686165 | Gpam/Ripk   |
| GO_BP_m1GO:00073 | fusion of s  | 2/2606  | 15/23843  | 0.499558 | 0.721602 | 0.686165 | Folr2/Spes  |
| GO_BP_m1GO:00091 | purine deo   | 2/2606  | 15/23843  | 0.499558 | 0.721602 | 0.686165 | Adk/Nudt1   |
| GO_BP_m1GO:00091 | nucleoside   | 2/2606  | 15/23843  | 0.499558 | 0.721602 | 0.686165 | Dera/Dpyd   |
| GO_BP_m1GO:00093 | amine cata   | 2/2606  | 15/23843  | 0.499558 | 0.721602 | 0.686165 | Atp2b4/Sai  |
| GO_BP_m1GO:00101 | embryonic    | 2/2606  | 15/23843  | 0.499558 | 0.721602 | 0.686165 | Grem2/Zfp   |
| GO_BP_m1GO:00106 | cell commu   | 2/2606  | 15/23843  | 0.499558 | 0.721602 | 0.686165 | Cav1/Gjc1   |
| GO_BP_m1GO:00161 | terpenoid l  | 2/2606  | 15/23843  | 0.499558 | 0.721602 | 0.686165 | Aldh1a3/H   |
| GO_BP_m1GO:00170 | protein nitr | 2/2606  | 15/23843  | 0.499558 | 0.721602 | 0.686165 | Adh5/Atp2   |
| GO_BP_m1GO:00199 | translesion  | 2/2606  | 15/23843  | 0.499558 | 0.721602 | 0.686165 | Pcna/Poli   |
| GO_BP_m1GO:00218 | layer form   | 2/2606  | 15/23843  | 0.499558 | 0.721602 | 0.686165 | Cdk5/Pafaf  |
| GO_BP_m1GO:00302 | male sex d   | 2/2606  | 15/23843  | 0.499558 | 0.721602 | 0.686165 | Dmrt1/Sry   |
| GO_BP_m1GO:00303 | stabilizati  | 2/2606  | 15/23843  | 0.499558 | 0.721602 | 0.686165 | Kcnk2/Kcni  |
| GO_BP_m1GO:00315 | intra-S DN   | 2/2606  | 15/23843  | 0.499558 | 0.721602 | 0.686165 | Rad9b/Tipi  |
| GO_BP_m1GO:00327 | negative re  | 2/2606  | 15/23843  | 0.499558 | 0.721602 | 0.686165 | Cactin/Ptp  |
| GO_BP_m1GO:00330 | positive re  | 2/2606  | 15/23843  | 0.499558 | 0.721602 | 0.686165 | Adam8/Il2r  |
| GO_BP_m1GO:00424 | serotonin r  | 2/2606  | 15/23843  | 0.499558 | 0.721602 | 0.686165 | Gch1/Htr1a  |
| GO_BP_m1GO:00427 | circadian sl | 2/2606  | 15/23843  | 0.499558 | 0.721602 | 0.686165 | Adora1/Kci  |
| GO_BP_m1GO:00443 | cellular res | 2/2606  | 15/23843  | 0.499558 | 0.721602 | 0.686165 | Bbs2/Mt3    |
| GO_BP_m1GO:00457 | positive re  | 2/2606  | 15/23843  | 0.499558 | 0.721602 | 0.686165 | Slc9a1/Tac  |
| GO_BP_m1GO:00458 | positive re  | 2/2606  | 15/23843  | 0.499558 | 0.721602 | 0.686165 | Esrrb/Myc   |
| GO_BP_m1GO:00459 | negative re  | 2/2606  | 15/23843  | 0.499558 | 0.721602 | 0.686165 | Fmr1/Tpr    |
| GO_BP_m1GO:00459 | positive re  | 2/2606  | 15/23843  | 0.499558 | 0.721602 | 0.686165 | Ctgf/Myk2   |
| GO_BP_m1GO:00466 | positive re  | 2/2606  | 15/23843  | 0.499558 | 0.721602 | 0.686165 | Nucks1/Os   |
| GO_BP_m1GO:00487 | negative re  | 2/2606  | 15/23843  | 0.499558 | 0.721602 | 0.686165 | Drd3/Nf1    |

|                               |         |           |          |          |          |             |
|-------------------------------|---------|-----------|----------|----------|----------|-------------|
| GO_BP_m1GO:005087white fat c  | 2/2606  | 15/23843  | 0.499558 | 0.721602 | 0.686165 | Adig/Tbl1x  |
| GO_BP_m1GO:005093induction c  | 2/2606  | 15/23843  | 0.499558 | 0.721602 | 0.686165 | Prkca/Scg2  |
| GO_BP_m1GO:005100regulation   | 2/2606  | 15/23843  | 0.499558 | 0.721602 | 0.686165 | Angptl3/Ni  |
| GO_BP_m1GO:005154keratinocyt  | 2/2606  | 15/23843  | 0.499558 | 0.721602 | 0.686165 | Fgf7/Has2   |
| GO_BP_m1GO:005170regulation   | 2/2606  | 15/23843  | 0.499558 | 0.721602 | 0.686165 | Arg1/Ilfng  |
| GO_BP_m1GO:006005angiogene    | 2/2606  | 15/23843  | 0.499558 | 0.721602 | 0.686165 | Adipor2/Gj  |
| GO_BP_m1GO:006009regulation   | 2/2606  | 15/23843  | 0.499558 | 0.721602 | 0.686165 | Cd36/Ncka   |
| GO_BP_m1GO:006025positive re  | 2/2606  | 15/23843  | 0.499558 | 0.721602 | 0.686165 | Myc/Plag1   |
| GO_BP_m1GO:006034heart trabe  | 2/2606  | 15/23843  | 0.499558 | 0.721602 | 0.686165 | Adamts1/C   |
| GO_BP_m1GO:007023positive re  | 2/2606  | 15/23843  | 0.499558 | 0.721602 | 0.686165 | Adam8/Sig   |
| GO_BP_m1GO:007025mucus secr   | 2/2606  | 15/23843  | 0.499558 | 0.721602 | 0.686165 | Adora1/P2   |
| GO_BP_m1GO:0070933'-UTR-me    | 2/2606  | 15/23843  | 0.499558 | 0.721602 | 0.686165 | Hnrnpa0/H   |
| GO_BP_m1GO:007159otic vesicle | 2/2606  | 15/23843  | 0.499558 | 0.721602 | 0.686165 | Stox1/Tbx1  |
| GO_BP_m1GO:007173response tr  | 2/2606  | 15/23843  | 0.499558 | 0.721602 | 0.686165 | Bcar1/Kcnc  |
| GO_BP_m1GO:007210glomerular   | 2/2606  | 15/23843  | 0.499558 | 0.721602 | 0.686165 | Ilfng/Wt1   |
| GO_BP_m1GO:007228metanephr    | 2/2606  | 15/23843  | 0.499558 | 0.721602 | 0.686165 | Gdnf/Smo    |
| GO_BP_m1GO:007233modified a   | 2/2606  | 15/23843  | 0.499558 | 0.721602 | 0.686165 | Folr2/Slc46 |
| GO_BP_m1GO:007241signal trans | 2/2606  | 15/23843  | 0.499558 | 0.721602 | 0.686165 | Cdkn1a/Prl  |
| GO_BP_m1GO:009710postsynapt   | 2/2606  | 15/23843  | 0.499558 | 0.721602 | 0.686165 | Cdh2/Cfl1   |
| GO_BP_m1GO:009908postsynapt   | 2/2606  | 15/23843  | 0.499558 | 0.721602 | 0.686165 | Cdh2/Cfl1   |
| GO_BP_m1GO:009956modificatic  | 2/2606  | 15/23843  | 0.499558 | 0.721602 | 0.686165 | Arhgap44/   |
| GO_BP_m1GO:190107regulation   | 2/2606  | 15/23843  | 0.499558 | 0.721602 | 0.686165 | Akap6/Pde   |
| GO_BP_m1GO:190131regulation   | 2/2606  | 15/23843  | 0.499558 | 0.721602 | 0.686165 | Rnase10/T   |
| GO_BP_m1GO:190152regulation   | 2/2606  | 15/23843  | 0.499558 | 0.721602 | 0.686165 | Park2/Tiga  |
| GO_BP_m1GO:190240signal trans | 2/2606  | 15/23843  | 0.499558 | 0.721602 | 0.686165 | Cdkn1a/Prl  |
| GO_BP_m1GO:190240signal trans | 2/2606  | 15/23843  | 0.499558 | 0.721602 | 0.686165 | Cdkn1a/Prl  |
| GO_BP_m1GO:190487positive re  | 2/2606  | 15/23843  | 0.499558 | 0.721602 | 0.686165 | Cct3/Nop1   |
| GO_BP_m1GO:200081negative re  | 2/2606  | 15/23843  | 0.499558 | 0.721602 | 0.686165 | Cav1/Ptrh2  |
| GO_BP_m1GO:200105regulation   | 2/2606  | 15/23843  | 0.499558 | 0.721602 | 0.686165 | Tbx1/Wt1    |
| GO_BP_m1GO:200127positive re  | 2/2606  | 15/23843  | 0.499558 | 0.721602 | 0.686165 | Osbpl8/Pal  |
| GO_BP_m1GO:000323cardiac ver  | 16/2606 | 143/23843 | 0.499982 | 0.721602 | 0.686165 | Cntrl/Dand  |
| GO_BP_m1GO:003085regulation   | 16/2606 | 143/23843 | 0.499982 | 0.721602 | 0.686165 | Alox12/Arr  |
| GO_BP_m1GO:000001regulation   | 1/2606  | 6/23843   | 0.500702 | 0.721602 | 0.686165 | Blm         |
| GO_BP_m1GO:000014actin cortic | 1/2606  | 6/23843   | 0.500702 | 0.721602 | 0.686165 | Wipf1       |
| GO_BP_m1GO:000016phosphore    | 1/2606  | 6/23843   | 0.500702 | 0.721602 | 0.686165 | Mtrf1       |
| GO_BP_m1GO:000170ectoderm f   | 1/2606  | 6/23843   | 0.500702 | 0.721602 | 0.686165 | Foxa2       |
| GO_BP_m1GO:000186NK T cell p  | 1/2606  | 6/23843   | 0.500702 | 0.721602 | 0.686165 | Il12b       |
| GO_BP_m1GO:000203regulation   | 1/2606  | 6/23843   | 0.500702 | 0.721602 | 0.686165 | Arl6ip5     |
| GO_BP_m1GO:000205osteoblast   | 1/2606  | 6/23843   | 0.500702 | 0.721602 | 0.686165 | Men1        |
| GO_BP_m1GO:000245T cell antig | 1/2606  | 6/23843   | 0.500702 | 0.721602 | 0.686165 | Trem14      |
| GO_BP_m1GO:000260positive re  | 1/2606  | 6/23843   | 0.500702 | 0.721602 | 0.686165 | Nod1        |
| GO_BP_m1GO:000267negative re  | 1/2606  | 6/23843   | 0.500702 | 0.721602 | 0.686165 | Il10        |
| GO_BP_m1GO:000273regulation   | 1/2606  | 6/23843   | 0.500702 | 0.721602 | 0.686165 | Jak3        |
| GO_BP_m1GO:000310negative re  | 1/2606  | 6/23843   | 0.500702 | 0.721602 | 0.686165 | Uts2r       |
| GO_BP_m1GO:000327apoptotic r  | 1/2606  | 6/23843   | 0.500702 | 0.721602 | 0.686165 | Foxc1       |
| GO_BP_m1GO:000328septum pri   | 1/2606  | 6/23843   | 0.500702 | 0.721602 | 0.686165 | Nsd2        |
| GO_BP_m1GO:000337dynamina     | 1/2606  | 6/23843   | 0.500702 | 0.721602 | 0.686165 | Dnm3        |
| GO_BP_m1GO:000337dynamina     | 1/2606  | 6/23843   | 0.500702 | 0.721602 | 0.686165 | Dnm3        |

|                                     |         |          |          |          |         |
|-------------------------------------|---------|----------|----------|----------|---------|
| GO_BP_m1GO:000341growth pla1/2606   | 6/23843 | 0.500702 | 0.721602 | 0.686165 | Poc1a   |
| GO_BP_m1GO:000343chondrocyt1/2606   | 6/23843 | 0.500702 | 0.721602 | 0.686165 | Poc1a   |
| GO_BP_m1GO:000604UDP-N-ac1/2606     | 6/23843 | 0.500702 | 0.721602 | 0.686165 | Pgm3    |
| GO_BP_m1GO:000649N-terminal1/2606   | 6/23843 | 0.500702 | 0.721602 | 0.686165 | Map6d1  |
| GO_BP_m1GO:000653glutamate 1/2606   | 6/23843 | 0.500702 | 0.721602 | 0.686165 | Got1    |
| GO_BP_m1GO:000654glycine bio1/2606  | 6/23843 | 0.500702 | 0.721602 | 0.686165 | Shmt1   |
| GO_BP_m1GO:000657tyrosine ca1/2606  | 6/23843 | 0.500702 | 0.721602 | 0.686165 | Hpd1    |
| GO_BP_m1GO:000668sphingomy1/2606    | 6/23843 | 0.500702 | 0.721602 | 0.686165 | Sptlc2  |
| GO_BP_m1GO:000670androgen t1/2606   | 6/23843 | 0.500702 | 0.721602 | 0.686165 | Scarb1  |
| GO_BP_m1GO:000679polyphospl1/2606   | 6/23843 | 0.500702 | 0.721602 | 0.686165 | Prune1  |
| GO_BP_m1GO:000679polyphospl1/2606   | 6/23843 | 0.500702 | 0.721602 | 0.686165 | Prune1  |
| GO_BP_m1GO:000682cobalt ion t1/2606 | 6/23843 | 0.500702 | 0.721602 | 0.686165 | Gif     |
| GO_BP_m1GO:000701cytoskeleta1/2606  | 6/23843 | 0.500702 | 0.721602 | 0.686165 | Gypa    |
| GO_BP_m1GO:000716receptor gt1/2606  | 6/23843 | 0.500702 | 0.721602 | 0.686165 | Npr2    |
| GO_BP_m1GO:000722positive re1/2606  | 6/23843 | 0.500702 | 0.721602 | 0.686165 | Maml3   |
| GO_BP_m1GO:000822opsonizatic1/2606  | 6/23843 | 0.500702 | 0.721602 | 0.686165 | Spon2   |
| GO_BP_m1GO:000863activation c1/2606 | 6/23843 | 0.500702 | 0.721602 | 0.686165 | Bok     |
| GO_BP_m1GO:000917pyrimidine 1/2606  | 6/23843 | 0.500702 | 0.721602 | 0.686165 | Shmt1   |
| GO_BP_m1GO:000921purine deo1/2606   | 6/23843 | 0.500702 | 0.721602 | 0.686165 | Nudt1   |
| GO_BP_m1GO:000924isopenteny1/2606   | 6/23843 | 0.500702 | 0.721602 | 0.686165 | Mvd     |
| GO_BP_m1GO:000943methylglyo1/2606   | 6/23843 | 0.500702 | 0.721602 | 0.686165 | Haghl   |
| GO_BP_m1GO:000944putrescine 1/2606  | 6/23843 | 0.500702 | 0.721602 | 0.686165 | Agmat   |
| GO_BP_m1GO:001057positive re1/2606  | 6/23843 | 0.500702 | 0.721602 | 0.686165 | Ptprj   |
| GO_BP_m1GO:001074regulation 1/2606  | 6/23843 | 0.500702 | 0.721602 | 0.686165 | Atp2b4  |
| GO_BP_m1GO:001084regulation 1/2606  | 6/23843 | 0.500702 | 0.721602 | 0.686165 | Uts2r   |
| GO_BP_m1GO:001099regulation 1/2606  | 6/23843 | 0.500702 | 0.721602 | 0.686165 | Smad6   |
| GO_BP_m1GO:001404negative re1/2606  | 6/23843 | 0.500702 | 0.721602 | 0.686165 | Ednrb   |
| GO_BP_m1GO:001572canalicular 1/2606 | 6/23843 | 0.500702 | 0.721602 | 0.686165 | Abcc3   |
| GO_BP_m1GO:001584polyamine 1/2606   | 6/23843 | 0.500702 | 0.721602 | 0.686165 | Oaz1    |
| GO_BP_m1GO:001587choline tra1/2606  | 6/23843 | 0.500702 | 0.721602 | 0.686165 | Scn4a   |
| GO_BP_m1GO:001607tRNA catak1/2606   | 6/23843 | 0.500702 | 0.721602 | 0.686165 | Exosc9  |
| GO_BP_m1GO:001611terpenoid c1/2606  | 6/23843 | 0.500702 | 0.721602 | 0.686165 | Crabp1  |
| GO_BP_m1GO:001655cytidine to 1/2606 | 6/23843 | 0.500702 | 0.721602 | 0.686165 | Apobec1 |
| GO_BP_m1GO:001840peptidyl-p1/2606   | 6/23843 | 0.500702 | 0.721602 | 0.686165 | Egln3   |
| GO_BP_m1GO:001940alditol bios1/2606 | 6/23843 | 0.500702 | 0.721602 | 0.686165 | Got1    |
| GO_BP_m1GO:002152somatic mc1/2606   | 6/23843 | 0.500702 | 0.721602 | 0.686165 | Lhx4    |
| GO_BP_m1GO:002164vestibulocc1/2606  | 6/23843 | 0.500702 | 0.721602 | 0.686165 | Atp8b1  |
| GO_BP_m1GO:002185cerebral co1/2606  | 6/23843 | 0.500702 | 0.721602 | 0.686165 | Arx     |
| GO_BP_m1GO:002193cerebellar t1/2606 | 6/23843 | 0.500702 | 0.721602 | 0.686165 | Smo     |
| GO_BP_m1GO:002260mammaliar1/2606    | 6/23843 | 0.500702 | 0.721602 | 0.686165 | Amh     |
| GO_BP_m1GO:003007insulin pro1/2606  | 6/23843 | 0.500702 | 0.721602 | 0.686165 | Cpz     |
| GO_BP_m1GO:003032transepithe1/2606  | 6/23843 | 0.500702 | 0.721602 | 0.686165 | Slc12a2 |
| GO_BP_m1GO:003091olfactory p1/2606  | 6/23843 | 0.500702 | 0.721602 | 0.686165 | Sox2    |
| GO_BP_m1GO:003113regulation 1/2606  | 6/23843 | 0.500702 | 0.721602 | 0.686165 | Wnt7a   |
| GO_BP_m1GO:003129membrane1/2606     | 6/23843 | 0.500702 | 0.721602 | 0.686165 | Aph1a   |
| GO_BP_m1GO:003199negative re1/2606  | 6/23843 | 0.500702 | 0.721602 | 0.686165 | Plin5   |
| GO_BP_m1GO:003205positive re1/2606  | 6/23843 | 0.500702 | 0.721602 | 0.686165 | Nck2    |
| GO_BP_m1GO:003241regulation 1/2606  | 6/23843 | 0.500702 | 0.721602 | 0.686165 | Drd3    |

|                                      |         |          |          |          |          |
|--------------------------------------|---------|----------|----------|----------|----------|
| GO_BP_m1GO:003246negative re1/2606   | 6/23843 | 0.500702 | 0.721602 | 0.686165 | E2f7     |
| GO_BP_m1GO:003273positive re1/2606   | 6/23843 | 0.500702 | 0.721602 | 0.686165 | Ccl20    |
| GO_BP_m1GO:003281positive re1/2606   | 6/23843 | 0.500702 | 0.721602 | 0.686165 | Il12b    |
| GO_BP_m1GO:003296regulation 1/2606   | 6/23843 | 0.500702 | 0.721602 | 0.686165 | P2ry1    |
| GO_BP_m1GO:003313positive re1/2606   | 6/23843 | 0.500702 | 0.721602 | 0.686165 | Pfkfb1   |
| GO_BP_m1GO:003409positive re1/2606   | 6/23843 | 0.500702 | 0.721602 | 0.686165 | H2afy    |
| GO_BP_m1GO:003411positive re1/2606   | 6/23843 | 0.500702 | 0.721602 | 0.686165 | Tnfsf11  |
| GO_BP_m1GO:003424negative re1/2606   | 6/23843 | 0.500702 | 0.721602 | 0.686165 | Cxcl10   |
| GO_BP_m1GO:00355Cnegative re1/2606   | 6/23843 | 0.500702 | 0.721602 | 0.686165 | Nckap1l  |
| GO_BP_m1GO:00356Einterleukin 1/2606  | 6/23843 | 0.500702 | 0.721602 | 0.686165 | Ticam2   |
| GO_BP_m1GO:00364Eintrinsic ap 1/2606 | 6/23843 | 0.500702 | 0.721602 | 0.686165 | Hsph1    |
| GO_BP_m1GO:00380Copioid rece1/2606   | 6/23843 | 0.500702 | 0.721602 | 0.686165 | Oprd1    |
| GO_BP_m1GO:004003snRNA mo1/2606      | 6/23843 | 0.500702 | 0.721602 | 0.686165 | Nop10    |
| GO_BP_m1GO:004003polar body 1/2606   | 6/23843 | 0.500702 | 0.721602 | 0.686165 | Washc5   |
| GO_BP_m1GO:004237vitamin K n1/2606   | 6/23843 | 0.500702 | 0.721602 | 0.686165 | Vkorc11l |
| GO_BP_m1GO:004242serotonin t1/2606   | 6/23843 | 0.500702 | 0.721602 | 0.686165 | Gch1     |
| GO_BP_m1GO:004271sperm ejac 1/2606   | 6/23843 | 0.500702 | 0.721602 | 0.686165 | Avpr1a   |
| GO_BP_m1GO:004274circadian sl1/2606  | 6/23843 | 0.500702 | 0.721602 | 0.686165 | Uts2r    |
| GO_BP_m1GO:00427Elong-chain 1/2606   | 6/23843 | 0.500702 | 0.721602 | 0.686165 | Aig1     |
| GO_BP_m1GO:004279snRNA trar 1/2606   | 6/23843 | 0.500702 | 0.721602 | 0.686165 | Ice1     |
| GO_BP_m1GO:00433Ceosinophil 1/2606   | 6/23843 | 0.500702 | 0.721602 | 0.686165 | Stx4a    |
| GO_BP_m1GO:00435Cmitochond 1/2606    | 6/23843 | 0.500702 | 0.721602 | 0.686165 | Lig3     |
| GO_BP_m1GO:004433canonical v1/2606   | 6/23843 | 0.500702 | 0.721602 | 0.686165 | Myc      |
| GO_BP_m1GO:004434canonical v1/2606   | 6/23843 | 0.500702 | 0.721602 | 0.686165 | Wnt3a    |
| GO_BP_m1GO:004436negative re1/2606   | 6/23843 | 0.500702 | 0.721602 | 0.686165 | Anxa2    |
| GO_BP_m1GO:004439actin cortic 1/2606 | 6/23843 | 0.500702 | 0.721602 | 0.686165 | Wipf1    |
| GO_BP_m1GO:00448CG-quadruc 1/2606    | 6/23843 | 0.500702 | 0.721602 | 0.686165 | Blm      |
| GO_BP_m1GO:004504protein im1/2606    | 6/23843 | 0.500702 | 0.721602 | 0.686165 | Pex5     |
| GO_BP_m1GO:004511integrin bic 1/2606 | 6/23843 | 0.500702 | 0.721602 | 0.686165 | Col5a1   |
| GO_BP_m1GO:004562negative re1/2606   | 6/23843 | 0.500702 | 0.721602 | 0.686165 | Zfp35    |
| GO_BP_m1GO:004607dGTP meta 1/2606    | 6/23843 | 0.500702 | 0.721602 | 0.686165 | Nudt1    |
| GO_BP_m1GO:004613pyrimidine 1/2606   | 6/23843 | 0.500702 | 0.721602 | 0.686165 | Dpyd     |
| GO_BP_m1GO:004613negative re1/2606   | 6/23843 | 0.500702 | 0.721602 | 0.686165 | Nfkb1    |
| GO_BP_m1GO:00464Eglyoxylate 1/2606   | 6/23843 | 0.500702 | 0.721602 | 0.686165 | Idh2     |
| GO_BP_m1GO:004649isopentenyl 1/2606  | 6/23843 | 0.500702 | 0.721602 | 0.686165 | Mvd      |
| GO_BP_m1GO:00466Eregulation 1/2606   | 6/23843 | 0.500702 | 0.721602 | 0.686165 | Casp6    |
| GO_BP_m1GO:004671regulation 1/2606   | 6/23843 | 0.500702 | 0.721602 | 0.686165 | Vapb     |
| GO_BP_m1GO:004683positive re1/2606   | 6/23843 | 0.500702 | 0.721602 | 0.686165 | Rbm27    |
| GO_BP_m1GO:004829positive re1/2606   | 6/23843 | 0.500702 | 0.721602 | 0.686165 | Nsd2     |
| GO_BP_m1GO:004859post-embr 1/2606    | 6/23843 | 0.500702 | 0.721602 | 0.686165 | Mir23a   |
| GO_BP_m1GO:004863positive re1/2606   | 6/23843 | 0.500702 | 0.721602 | 0.686165 | Rps6kb1  |
| GO_BP_m1GO:00486Esprouting c 1/2606  | 6/23843 | 0.500702 | 0.721602 | 0.686165 | Lamb2    |
| GO_BP_m1GO:004884otolith dev 1/2606  | 6/23843 | 0.500702 | 0.721602 | 0.686165 | Bloc1s5  |
| GO_BP_m1GO:00488Eencephal 1/2606     | 6/23843 | 0.500702 | 0.721602 | 0.686165 | Sox2     |
| GO_BP_m1GO:005101microtubul 1/2606   | 6/23843 | 0.500702 | 0.721602 | 0.686165 | Katna1   |
| GO_BP_m1GO:005109regulation 1/2606   | 6/23843 | 0.500702 | 0.721602 | 0.686165 | Msh3     |
| GO_BP_m1GO:005161serotonin t 1/2606  | 6/23843 | 0.500702 | 0.721602 | 0.686165 | Snca     |
| GO_BP_m1GO:005177negative re1/2606   | 6/23843 | 0.500702 | 0.721602 | 0.686165 | Fnta     |

|                                       |         |          |          |          |          |
|---------------------------------------|---------|----------|----------|----------|----------|
| GO_BP_m1GO:00522C negative re1/2606   | 6/23843 | 0.500702 | 0.721602 | 0.686165 | Anxa2    |
| GO_BP_m1GO:00524C negative re1/2606   | 6/23843 | 0.500702 | 0.721602 | 0.686165 | Anxa2    |
| GO_BP_m1GO:00528Cimidazole- 1/2606    | 6/23843 | 0.500702 | 0.721602 | 0.686165 | Hdc      |
| GO_BP_m1GO:00550C response tr1/2606   | 6/23843 | 0.500702 | 0.721602 | 0.686165 | Cav1     |
| GO_BP_m1GO:00600C hard palate1/2606   | 6/23843 | 0.500702 | 0.721602 | 0.686165 | Foxe1    |
| GO_BP_m1GO:00600C rhythmic sy1/2606   | 6/23843 | 0.500702 | 0.721602 | 0.686165 | Nlgn3    |
| GO_BP_m1GO:00602C negative re1/2606   | 6/23843 | 0.500702 | 0.721602 | 0.686165 | Bcr      |
| GO_BP_m1GO:006031 negative re1/2606   | 6/23843 | 0.500702 | 0.721602 | 0.686165 | Fkbp1b   |
| GO_BP_m1GO:006037 mast cell d 1/2606  | 6/23843 | 0.500702 | 0.721602 | 0.686165 | Itgam    |
| GO_BP_m1GO:00606C tube lumer 1/2606   | 6/23843 | 0.500702 | 0.721602 | 0.686165 | Cdh1     |
| GO_BP_m1GO:00606C salivary gla 1/2606 | 6/23843 | 0.500702 | 0.721602 | 0.686165 | Cdh1     |
| GO_BP_m1GO:006071 chorionic tr1/2606  | 6/23843 | 0.500702 | 0.721602 | 0.686165 | E2f7     |
| GO_BP_m1GO:00607C regulation 1/2606   | 6/23843 | 0.500702 | 0.721602 | 0.686165 | Cav3     |
| GO_BP_m1GO:00610C uterus mor 1/2606   | 6/23843 | 0.500702 | 0.721602 | 0.686165 | Wnt7a    |
| GO_BP_m1GO:00610C positive re1/2606   | 6/23843 | 0.500702 | 0.721602 | 0.686165 | Ogt      |
| GO_BP_m1GO:006131 BMP signal 1/2606   | 6/23843 | 0.500702 | 0.721602 | 0.686165 | Nog      |
| GO_BP_m1GO:006134 cell adhesi 1/2606  | 6/23843 | 0.500702 | 0.721602 | 0.686165 | Flrt2    |
| GO_BP_m1GO:00616C mitochond 1/2606    | 6/23843 | 0.500702 | 0.721602 | 0.686165 | Dhx30    |
| GO_BP_m1GO:00616C chaperone 1/2606    | 6/23843 | 0.500702 | 0.721602 | 0.686165 | Snca     |
| GO_BP_m1GO:00617C lipophagy 1/2606    | 6/23843 | 0.500702 | 0.721602 | 0.686165 | Sptlc2   |
| GO_BP_m1GO:00617C parkin-me 1/2606    | 6/23843 | 0.500702 | 0.721602 | 0.686165 | Park2    |
| GO_BP_m1GO:00702C negative re1/2606   | 6/23843 | 0.500702 | 0.721602 | 0.686165 | Gpam     |
| GO_BP_m1GO:007024 positive re1/2606   | 6/23843 | 0.500702 | 0.721602 | 0.686165 | Adam8    |
| GO_BP_m1GO:007027 extracellula 1/2606 | 6/23843 | 0.500702 | 0.721602 | 0.686165 | Ctgf     |
| GO_BP_m1GO:00703C lens fiber c 1/2606 | 6/23843 | 0.500702 | 0.721602 | 0.686165 | Epha2    |
| GO_BP_m1GO:00703C thyroid hor 1/2606  | 6/23843 | 0.500702 | 0.721602 | 0.686165 | Ttr      |
| GO_BP_m1GO:00703C response tr1/2606   | 6/23843 | 0.500702 | 0.721602 | 0.686165 | Cd36     |
| GO_BP_m1GO:007044 positive re1/2606   | 6/23843 | 0.500702 | 0.721602 | 0.686165 | Nog      |
| GO_BP_m1GO:00705C regulation 1/2606   | 6/23843 | 0.500702 | 0.721602 | 0.686165 | Kank2    |
| GO_BP_m1GO:007084 aggresome 1/2606    | 6/23843 | 0.500702 | 0.721602 | 0.686165 | Park2    |
| GO_BP_m1GO:007094 regulation 1/2606   | 6/23843 | 0.500702 | 0.721602 | 0.686165 | Arg1     |
| GO_BP_m1GO:00710C nuclear ncf 1/2606  | 6/23843 | 0.500702 | 0.721602 | 0.686165 | Exosc9   |
| GO_BP_m1GO:00710C nuclear pol 1/2606  | 6/23843 | 0.500702 | 0.721602 | 0.686165 | Exosc9   |
| GO_BP_m1GO:007104 nuclear pol 1/2606  | 6/23843 | 0.500702 | 0.721602 | 0.686165 | Exosc9   |
| GO_BP_m1GO:00712C cellular res 1/2606 | 6/23843 | 0.500702 | 0.721602 | 0.686165 | Cd36     |
| GO_BP_m1GO:00712C cellular res 1/2606 | 6/23843 | 0.500702 | 0.721602 | 0.686165 | Cd36     |
| GO_BP_m1GO:007147 cellular hy 1/2606  | 6/23843 | 0.500702 | 0.721602 | 0.686165 | Trpv4    |
| GO_BP_m1GO:00715C cellular res 1/2606 | 6/23843 | 0.500702 | 0.721602 | 0.686165 | Stox1    |
| GO_BP_m1GO:00715C protein ufn 1/2606  | 6/23843 | 0.500702 | 0.721602 | 0.686165 | Ddrgk1   |
| GO_BP_m1GO:00716C olfactory p 1/2606  | 6/23843 | 0.500702 | 0.721602 | 0.686165 | Sox2     |
| GO_BP_m1GO:00716C olfactory p 1/2606  | 6/23843 | 0.500702 | 0.721602 | 0.686165 | Sox2     |
| GO_BP_m1GO:007191 determinat 1/2606   | 6/23843 | 0.500702 | 0.721602 | 0.686165 | Dnaaf1   |
| GO_BP_m1GO:007204 comma-sh 1/2606     | 6/23843 | 0.500702 | 0.721602 | 0.686165 | Wt1      |
| GO_BP_m1GO:00721C glomerulus 1/2606   | 6/23843 | 0.500702 | 0.721602 | 0.686165 | Pdgfra   |
| GO_BP_m1GO:00721C glomerular 1/2606   | 6/23843 | 0.500702 | 0.721602 | 0.686165 | Pdgfra   |
| GO_BP_m1GO:007217 mesoneph 1/2606     | 6/23843 | 0.500702 | 0.721602 | 0.686165 | Osr1     |
| GO_BP_m1GO:00722C regulation 1/2606   | 6/23843 | 0.500702 | 0.721602 | 0.686165 | Wt1      |
| GO_BP_m1GO:00725C pyrimidine 1/2606   | 6/23843 | 0.500702 | 0.721602 | 0.686165 | Slc25a33 |

|                   |              |        |         |          |          |          |          |
|-------------------|--------------|--------|---------|----------|----------|----------|----------|
| GO_BP_m1GO:00725  | terminal bu  | 1/2606 | 6/23843 | 0.500702 | 0.721602 | 0.686165 | Nlgn3    |
| GO_BP_m1GO:009032 | regulation   | 1/2606 | 6/23843 | 0.500702 | 0.721602 | 0.686165 | Drd3     |
| GO_BP_m1GO:00905  | Endocardia   | 1/2606 | 6/23843 | 0.500702 | 0.721602 | 0.686165 | Has2     |
| GO_BP_m1GO:009711 | NMDA glui    | 1/2606 | 6/23843 | 0.500702 | 0.721602 | 0.686165 | Htr1a    |
| GO_BP_m1GO:00988  | exocytic in  | 1/2606 | 6/23843 | 0.500702 | 0.721602 | 0.686165 | Stx1b    |
| GO_BP_m1GO:00989  | regulation   | 1/2606 | 6/23843 | 0.500702 | 0.721602 | 0.686165 | Cav3     |
| GO_BP_m1GO:00989  | dendritic tr | 1/2606 | 6/23843 | 0.500702 | 0.721602 | 0.686165 | Stau2    |
| GO_BP_m1GO:00989  | anterograd   | 1/2606 | 6/23843 | 0.500702 | 0.721602 | 0.686165 | Stau2    |
| GO_BP_m1GO:00989  | exocytic in  | 1/2606 | 6/23843 | 0.500702 | 0.721602 | 0.686165 | Stx1b    |
| GO_BP_m1GO:00996  | neurotrans   | 1/2606 | 6/23843 | 0.500702 | 0.721602 | 0.686165 | Arhgap44 |
| GO_BP_m1GO:19001  | regulation   | 1/2606 | 6/23843 | 0.500702 | 0.721602 | 0.686165 | Rflna    |
| GO_BP_m1GO:19001  | negative re  | 1/2606 | 6/23843 | 0.500702 | 0.721602 | 0.686165 | Npr2     |
| GO_BP_m1GO:19002  | positive re  | 1/2606 | 6/23843 | 0.500702 | 0.721602 | 0.686165 | Cd36     |
| GO_BP_m1GO:19011  | primary ar   | 1/2606 | 6/23843 | 0.500702 | 0.721602 | 0.686165 | Gch1     |
| GO_BP_m1GO:19015  | negative re  | 1/2606 | 6/23843 | 0.500702 | 0.721602 | 0.686165 | Tigar    |
| GO_BP_m1GO:19015  | response tr  | 1/2606 | 6/23843 | 0.500702 | 0.721602 | 0.686165 | Blm      |
| GO_BP_m1GO:19017  | positive re  | 1/2606 | 6/23843 | 0.500702 | 0.721602 | 0.686165 | BC004004 |
| GO_BP_m1GO:19020  | positive re  | 1/2606 | 6/23843 | 0.500702 | 0.721602 | 0.686165 | Kitl     |
| GO_BP_m1GO:19020  | polyamine    | 1/2606 | 6/23843 | 0.500702 | 0.721602 | 0.686165 | Oaz1     |
| GO_BP_m1GO:19020  | negative re  | 1/2606 | 6/23843 | 0.500702 | 0.721602 | 0.686165 | Atp2b4   |
| GO_BP_m1GO:19024  | regulation   | 1/2606 | 6/23843 | 0.500702 | 0.721602 | 0.686165 | Nlgn3    |
| GO_BP_m1GO:19028  | negative re  | 1/2606 | 6/23843 | 0.500702 | 0.721602 | 0.686165 | Fmr1     |
| GO_BP_m1GO:19032  | positive re  | 1/2606 | 6/23843 | 0.500702 | 0.721602 | 0.686165 | Ralbp1   |
| GO_BP_m1GO:19032  | negative re  | 1/2606 | 6/23843 | 0.500702 | 0.721602 | 0.686165 | Atp2b4   |
| GO_BP_m1GO:19034  | L-arginine   | 1/2606 | 6/23843 | 0.500702 | 0.721602 | 0.686165 | AU018091 |
| GO_BP_m1GO:19036  | regulation   | 1/2606 | 6/23843 | 0.500702 | 0.721602 | 0.686165 | Rreb1    |
| GO_BP_m1GO:19038  | arginine tr  | 1/2606 | 6/23843 | 0.500702 | 0.721602 | 0.686165 | AU018091 |
| GO_BP_m1GO:19038  | regulation   | 1/2606 | 6/23843 | 0.500702 | 0.721602 | 0.686165 | Ficd     |
| GO_BP_m1GO:19040  | positive re  | 1/2606 | 6/23843 | 0.500702 | 0.721602 | 0.686165 | Oprl1    |
| GO_BP_m1GO:19044  | protein loc  | 1/2606 | 6/23843 | 0.500702 | 0.721602 | 0.686165 | Cc2d2a   |
| GO_BP_m1GO:19045  | response tr  | 1/2606 | 6/23843 | 0.500702 | 0.721602 | 0.686165 | Man1b1   |
| GO_BP_m1GO:19047  | regulation   | 1/2606 | 6/23843 | 0.500702 | 0.721602 | 0.686165 | Nmd3     |
| GO_BP_m1GO:19049  | interneuror  | 1/2606 | 6/23843 | 0.500702 | 0.721602 | 0.686165 | Arx      |
| GO_BP_m1GO:19050  | regulation   | 1/2606 | 6/23843 | 0.500702 | 0.721602 | 0.686165 | Nog      |
| GO_BP_m1GO:19050  | negative re  | 1/2606 | 6/23843 | 0.500702 | 0.721602 | 0.686165 | Timp1    |
| GO_BP_m1GO:19052  | positive re  | 1/2606 | 6/23843 | 0.500702 | 0.721602 | 0.686165 | Endog    |
| GO_BP_m1GO:19052  | vascular as  | 1/2606 | 6/23843 | 0.500702 | 0.721602 | 0.686165 | E2f3     |
| GO_BP_m1GO:19053  | telomerase   | 1/2606 | 6/23843 | 0.500702 | 0.721602 | 0.686165 | Atr      |
| GO_BP_m1GO:19054  | regulation   | 1/2606 | 6/23843 | 0.500702 | 0.721602 | 0.686165 | E2f3     |
| GO_BP_m1GO:19056  | regulation   | 1/2606 | 6/23843 | 0.500702 | 0.721602 | 0.686165 | Ephb4    |
| GO_BP_m1GO:19908  | basic amin   | 1/2606 | 6/23843 | 0.500702 | 0.721602 | 0.686165 | AU018091 |
| GO_BP_m1GO:20000  | regulation   | 1/2606 | 6/23843 | 0.500702 | 0.721602 | 0.686165 | Dgkq     |
| GO_BP_m1GO:20001  | negative re  | 1/2606 | 6/23843 | 0.500702 | 0.721602 | 0.686165 | St6gal1  |
| GO_BP_m1GO:20002  | positive re  | 1/2606 | 6/23843 | 0.500702 | 0.721602 | 0.686165 | Pthr2    |
| GO_BP_m1GO:20003  | regulation   | 1/2606 | 6/23843 | 0.500702 | 0.721602 | 0.686165 | Sharpin  |
| GO_BP_m1GO:20004  | regulation   | 1/2606 | 6/23843 | 0.500702 | 0.721602 | 0.686165 | Adam8    |
| GO_BP_m1GO:20004  | negative re  | 1/2606 | 6/23843 | 0.500702 | 0.721602 | 0.686165 | Ptpn22   |
| GO_BP_m1GO:20006  | regulation   | 1/2606 | 6/23843 | 0.500702 | 0.721602 | 0.686165 | Il1rn    |

|                                       |           |          |          |          |              |
|---------------------------------------|-----------|----------|----------|----------|--------------|
| GO_BP_m1GO:200128regulation 1/2606    | 6/23843   | 0.500702 | 0.721602 | 0.686165 | Cav3         |
| GO_BP_m1GO:007123cellular res 21/2606 | 189/23843 | 0.502648 | 0.724288 | 0.68872  | Bnip3/Cfl1/  |
| GO_BP_m1GO:190188negative re8/2606    | 70/23843  | 0.50292  | 0.724442 | 0.688865 | Cfl1/Cib1/F  |
| GO_BP_m1GO:20001Cnegative re8/2606    | 70/23843  | 0.50292  | 0.724442 | 0.688865 | Blm/Dock8    |
| GO_BP_m1GO:004662regulation 7/2606    | 61/23843  | 0.505734 | 0.727914 | 0.692167 | Gpr21/Nuc    |
| GO_BP_m1GO:005159response tr7/2606    | 61/23843  | 0.505734 | 0.727914 | 0.692167 | Akap6/Cdk    |
| GO_BP_m1GO:007126cellular res 7/2606  | 61/23843  | 0.505734 | 0.727914 | 0.692167 | Ankrd1/Ca    |
| GO_BP_m1GO:001056regulation 13/2606   | 116/23843 | 0.505744 | 0.727914 | 0.692167 | Atp2b4/Av    |
| GO_BP_m1GO:00517Cinteraction 13/2606  | 116/23843 | 0.505744 | 0.727914 | 0.692167 | Cav1/Gsn/I   |
| GO_BP_m1GO:003428response tr19/2606   | 171/23843 | 0.50596  | 0.728105 | 0.692349 | Ano1/Casp    |
| GO_BP_m1GO:004312regulation 18/2606   | 162/23843 | 0.507754 | 0.730448 | 0.694576 | 5730559C1    |
| GO_BP_m1GO:006157actin filame18/2606  | 162/23843 | 0.507754 | 0.730448 | 0.694576 | Abl2/Cfl1/C  |
| GO_BP_m1GO:001612sterol biosy6/2606   | 52/23843  | 0.509015 | 0.731543 | 0.695618 | Fdft1/Fgf1/  |
| GO_BP_m1GO:002156cerebellum6/2606     | 52/23843  | 0.509015 | 0.731543 | 0.695618 | Abl2/Cdk5,   |
| GO_BP_m1GO:004339negative re6/2606    | 52/23843  | 0.509015 | 0.731543 | 0.695618 | E2f1/Hdac2   |
| GO_BP_m1GO:00488Cgenitalia d6/2606    | 52/23843  | 0.509015 | 0.731543 | 0.695618 | Asb1/Hsd1    |
| GO_BP_m1GO:190355negative re6/2606    | 52/23843  | 0.509015 | 0.731543 | 0.695618 | Cactin/Gpr   |
| GO_BP_m1GO:19052Cregulation 6/2606    | 52/23843  | 0.509015 | 0.731543 | 0.695618 | Akap6/Cav    |
| GO_BP_m1GO:005086regulation 29/2606   | 263/23843 | 0.509321 | 0.731862 | 0.695922 | Aplf/Cdkn1   |
| GO_BP_m1GO:004593positive re17/2606   | 153/23843 | 0.509656 | 0.732225 | 0.696266 | Cdc7/Cdk1    |
| GO_BP_m1GO:00301Cnatural kill11/2606  | 98/23843  | 0.510422 | 0.733205 | 0.697198 | Gm13271/I    |
| GO_BP_m1GO:006056developme28/2606     | 254/23843 | 0.510791 | 0.733615 | 0.697588 | Aatk/Cadrr   |
| GO_BP_m1GO:001839internal pe16/2606   | 144/23843 | 0.511682 | 0.734774 | 0.69869  | Brpf3/Nat8   |
| GO_BP_m1GO:000191T cell medi5/2606    | 43/23843  | 0.512966 | 0.735896 | 0.699757 | Fam49b/Il1   |
| GO_BP_m1GO:000721dopamine 5/2606      | 43/23843  | 0.512966 | 0.735896 | 0.699757 | Adra1d/Dra   |
| GO_BP_m1GO:003111negative re5/2606    | 43/23843  | 0.512966 | 0.735896 | 0.699757 | Cib1/Fgf13   |
| GO_BP_m1GO:00507Cinterleukin-5/2606   | 43/23843  | 0.512966 | 0.735896 | 0.699757 | Cd36/Gsdr    |
| GO_BP_m1GO:007053protein K65/2606     | 43/23843  | 0.512966 | 0.735896 | 0.699757 | Arih2/Park2  |
| GO_BP_m1GO:007138cellular res 5/2606  | 43/23843  | 0.512966 | 0.735896 | 0.699757 | Eif4e/Gdnf,  |
| GO_BP_m1GO:001065muscle cell10/2606   | 89/23843  | 0.513121 | 0.735999 | 0.699855 | Alox12/Bni   |
| GO_BP_m1GO:001648cytosolic tr15/2606  | 135/23843 | 0.513849 | 0.736802 | 0.700619 | Ankfy1/Dn,   |
| GO_BP_m1GO:007064protein mo15/2606    | 135/23843 | 0.513849 | 0.736802 | 0.700619 | Asxl1/Eif3f/ |
| GO_BP_m1GO:004211T cell activ53/2606  | 484/23843 | 0.516164 | 0.74     | 0.70366  | Abl2/Adarr   |
| GO_BP_m1GO:000236T cell cytok4/2606   | 34/23843  | 0.517947 | 0.740984 | 0.704595 | Arg1/Il12b,  |
| GO_BP_m1GO:000286regulation 4/2606    | 34/23843  | 0.517947 | 0.740984 | 0.704595 | Gpx1/Gpx2    |
| GO_BP_m1GO:000803neuron rec4/2606     | 34/23843  | 0.517947 | 0.740984 | 0.704595 | Dscaml1/Ej   |
| GO_BP_m1GO:001061positive re4/2606    | 34/23843  | 0.517947 | 0.740984 | 0.704595 | Adk/Akap6    |
| GO_BP_m1GO:001474positive re4/2606    | 34/23843  | 0.517947 | 0.740984 | 0.704595 | Adk/Akap6    |
| GO_BP_m1GO:003164positive re4/2606    | 34/23843  | 0.517947 | 0.740984 | 0.704595 | Cartpt/Mir2  |
| GO_BP_m1GO:003314regulation 4/2606    | 34/23843  | 0.517947 | 0.740984 | 0.704595 | Ddrgk1/Ka    |
| GO_BP_m1GO:004632regulation 4/2606    | 34/23843  | 0.517947 | 0.740984 | 0.704595 | Dgat1/Lonj   |
| GO_BP_m1GO:004659regulation 4/2606    | 34/23843  | 0.517947 | 0.740984 | 0.704595 | Gsn/Ifitm2/  |
| GO_BP_m1GO:004884axon exten4/2606     | 34/23843  | 0.517947 | 0.740984 | 0.704595 | Plxna2/Sen   |
| GO_BP_m1GO:007057regulation 4/2606    | 34/23843  | 0.517947 | 0.740984 | 0.704595 | Fkbp1b/Klk   |
| GO_BP_m1GO:190001regulation 4/2606    | 34/23843  | 0.517947 | 0.740984 | 0.704595 | D1Ertd622,   |
| GO_BP_m1GO:190228neuron prc4/2606     | 34/23843  | 0.517947 | 0.740984 | 0.704595 | Plxna2/Sen   |
| GO_BP_m1GO:005081coagulation18/2606   | 163/23843 | 0.518738 | 0.741996 | 0.705558 | Abat/Alox1   |
| GO_BP_m1GO:003286response tr23/2606   | 209/23843 | 0.51909  | 0.742379 | 0.705922 | Appl1/Bcar   |



|                                       |           |          |          |          |              |
|---------------------------------------|-----------|----------|----------|----------|--------------|
| GO_BP_m1GO:00022C somatic div8/2606   | 71/23843  | 0.51957  | 0.742823 | 0.706344 | Ap1f/1fng/1l |
| GO_BP_m1GO:004362 response tr8/2606   | 71/23843  | 0.51957  | 0.742823 | 0.706344 | Arsb/Ash2l   |
| GO_BP_m1GO:190401 positive re21/2606  | 191/23843 | 0.522977 | 0.746621 | 0.709956 | Adm/Angp     |
| GO_BP_m1GO:001993 cAMP-mec16/2606     | 145/23843 | 0.523314 | 0.746621 | 0.709956 | Adcyap1r1.   |
| GO_BP_m1GO:000073 syncytium i7/2606   | 62/23843  | 0.523543 | 0.746621 | 0.709956 | Adam8/Ca     |
| GO_BP_m1GO:000183 release of c7/2606  | 62/23843  | 0.523543 | 0.746621 | 0.709956 | Bnip3/Bok/   |
| GO_BP_m1GO:000633 transcriptic7/2606  | 62/23843  | 0.523543 | 0.746621 | 0.709956 | Cand1/Gtf2   |
| GO_BP_m1GO:005105 positive re7/2606   | 62/23843  | 0.523543 | 0.746621 | 0.709956 | Abra/Adcy.   |
| GO_BP_m1GO:200017 positive re7/2606   | 62/23843  | 0.523543 | 0.746621 | 0.709956 | Dct/Dll4/Dl  |
| GO_BP_m1GO:000206 chondrocyt11/2606   | 99/23843  | 0.524495 | 0.746621 | 0.709956 | Col11a2/Ct   |
| GO_BP_m1GO:000175 organ indu3/2606    | 25/23843  | 0.524692 | 0.746621 | 0.709956 | Fgf1/Gdnf/   |
| GO_BP_m1GO:001046 positive re3/2606   | 25/23843  | 0.524692 | 0.746621 | 0.709956 | Adm/Avpr1.   |
| GO_BP_m1GO:001482 phasic smc3/2606    | 25/23843  | 0.524692 | 0.746621 | 0.709956 | EdnrB/Gdn    |
| GO_BP_m1GO:001572 bile acid ar3/2606  | 25/23843  | 0.524692 | 0.746621 | 0.709956 | Abcc3/Slc1   |
| GO_BP_m1GO:001598 energy cou3/2606    | 25/23843  | 0.524692 | 0.746621 | 0.709956 | Atp5a1/Atf   |
| GO_BP_m1GO:001598 ATP synthe3/2606    | 25/23843  | 0.524692 | 0.746621 | 0.709956 | Atp5a1/Atf   |
| GO_BP_m1GO:003051 positive re3/2606   | 25/23843  | 0.524692 | 0.746621 | 0.709956 | Flcn/Men1.   |
| GO_BP_m1GO:003445 microtubul3/2606    | 25/23843  | 0.524692 | 0.746621 | 0.709956 | Ccdc68/Ce    |
| GO_BP_m1GO:004564 positive re3/2606   | 25/23843  | 0.524692 | 0.746621 | 0.709956 | Nkap1l/Pr    |
| GO_BP_m1GO:005083 defense re3/2606    | 25/23843  | 0.524692 | 0.746621 | 0.709956 | Arg1/Jagn1   |
| GO_BP_m1GO:005144 positive re3/2606   | 25/23843  | 0.524692 | 0.746621 | 0.709956 | Arrdc4/Cdc   |
| GO_BP_m1GO:006004 positive re3/2606   | 25/23843  | 0.524692 | 0.746621 | 0.709956 | Cdk1/Ncan    |
| GO_BP_m1GO:006109 negative re3/2606   | 25/23843  | 0.524692 | 0.746621 | 0.709956 | Cav1/Gprc1   |
| GO_BP_m1GO:007123 cellular resj3/2606 | 25/23843  | 0.524692 | 0.746621 | 0.709956 | Mir23a/Mir   |
| GO_BP_m1GO:007263 interleukin-3/2606  | 25/23843  | 0.524692 | 0.746621 | 0.709956 | Hyal2/Ptpn   |
| GO_BP_m1GO:007267 eosinophil 3/2606   | 25/23843  | 0.524692 | 0.746621 | 0.709956 | Adam8/Ccl    |
| GO_BP_m1GO:008005 response tr3/2606   | 25/23843  | 0.524692 | 0.746621 | 0.709956 | Mir23a/Mir   |
| GO_BP_m1GO:00989C regulation 3/2606   | 25/23843  | 0.524692 | 0.746621 | 0.709956 | Cav1/Cav3.   |
| GO_BP_m1GO:190384 positive re3/2606   | 25/23843  | 0.524692 | 0.746621 | 0.709956 | Flcn/Men1.   |
| GO_BP_m1GO:200005 regulation 3/2606   | 25/23843  | 0.524692 | 0.746621 | 0.709956 | Abl2/Csnk1   |
| GO_BP_m1GO:200051 negative re3/2606   | 25/23843  | 0.524692 | 0.746621 | 0.709956 | Jak3/Smad    |
| GO_BP_m1GO:000979 post-embr15/2606    | 136/23843 | 0.525852 | 0.748151 | 0.711411 | Abl2/Cfc1/   |
| GO_BP_m1GO:000633 DNA modit10/2606    | 90/23843  | 0.52787  | 0.750842 | 0.713969 | Apobec1/E    |
| GO_BP_m1GO:00159C long-chain6/2606    | 53/23843  | 0.528264 | 0.750842 | 0.713969 | Abcd3/Acs    |
| GO_BP_m1GO:004253 positive re6/2606   | 53/23843  | 0.528264 | 0.750842 | 0.713969 | Hdac1/Hda    |
| GO_BP_m1GO:004273 exogenous6/2606     | 53/23843  | 0.528264 | 0.750842 | 0.713969 | Cyp2b10/C    |
| GO_BP_m1GO:004658 negative re6/2606   | 53/23843  | 0.528264 | 0.750842 | 0.713969 | Abl2/Arhga   |
| GO_BP_m1GO:006138 trabecula n6/2606   | 53/23843  | 0.528264 | 0.750842 | 0.713969 | Adamts1/C    |
| GO_BP_m1GO:006048 mesenchyr28/2606    | 256/23843 | 0.528342 | 0.750842 | 0.713969 | Cfl1/Dand5   |
| GO_BP_m1GO:00027C positive re14/2606  | 127/23843 | 0.528593 | 0.750956 | 0.714077 | Arg1/Cadn    |
| GO_BP_m1GO:003502 regulation 14/2606  | 127/23843 | 0.528593 | 0.750956 | 0.714077 | Abl2/Abra/   |
| GO_BP_m1GO:000269 negative re18/2606  | 164/23843 | 0.529661 | 0.751217 | 0.714325 | Arg1/Bcr/C   |
| GO_BP_m1GO:00301C regulation 27/2606  | 247/23843 | 0.530175 | 0.751217 | 0.714325 | Ankfy1/An    |
| GO_BP_m1GO:003304 regulation 36/2606  | 330/23843 | 0.53131  | 0.751217 | 0.714325 | Apobec1/A    |
| GO_BP_m1GO:000193 regulation 13/2606  | 118/23843 | 0.531572 | 0.751217 | 0.714325 | Arg1/Atp5a   |
| GO_BP_m1GO:005068 regulation 13/2606  | 118/23843 | 0.531572 | 0.751217 | 0.714325 | Cpeb3/Fmi    |
| GO_BP_m1GO:00610C hepaticobil13/2606  | 118/23843 | 0.531572 | 0.751217 | 0.714325 | Cadm1/Cfc    |
| GO_BP_m1GO:006201 negative re13/2606  | 118/23843 | 0.531572 | 0.751217 | 0.714325 | Adra1d/Ak    |

|                   |               |         |           |          |          |          |             |
|-------------------|---------------|---------|-----------|----------|----------|----------|-------------|
| GO_BP_m1GO:00032  | ventricular   | 9/2606  | 81/23843  | 0.531672 | 0.751217 | 0.714325 | Cntrl/Dand  |
| GO_BP_m1GO:00159  | fatty acid tr | 9/2606  | 81/23843  | 0.531672 | 0.751217 | 0.714325 | Abcd3/Acs   |
| GO_BP_m1GO:00192  | regulation    | 9/2606  | 81/23843  | 0.531672 | 0.751217 | 0.714325 | Avpr1a/Ca   |
| GO_BP_m1GO:000724 | I-kappaB k    | 21/2606 | 192/23843 | 0.533067 | 0.751217 | 0.714325 | 5730559C1   |
| GO_BP_m1GO:000247 | antigen prc   | 5/2606  | 44/23843  | 0.534071 | 0.751217 | 0.714325 | Calr/Gm11   |
| GO_BP_m1GO:00033  | epithelial c  | 5/2606  | 44/23843  | 0.534071 | 0.751217 | 0.714325 | Cdh1/Cgn/   |
| GO_BP_m1GO:00066  | cholesterol   | 5/2606  | 44/23843  | 0.534071 | 0.751217 | 0.714325 | Fdft1/Fgf1/ |
| GO_BP_m1GO:004312 | negative re   | 5/2606  | 44/23843  | 0.534071 | 0.751217 | 0.714325 | Casp8/Hda   |
| GO_BP_m1GO:006191 | selective at  | 5/2606  | 44/23843  | 0.534071 | 0.751217 | 0.714325 | Nod1/Park   |
| GO_BP_m1GO:190314 | regulation    | 5/2606  | 44/23843  | 0.534071 | 0.751217 | 0.714325 | Bnip3/Kat2  |
| GO_BP_m1GO:19037  | C negative re | 16/2606 | 146/23843 | 0.534871 | 0.751217 | 0.714325 | Cartpt/Cib: |
| GO_BP_m1GO:00009  | RNA 5'-enr    | 2/2606  | 16/23843  | 0.535018 | 0.751217 | 0.714325 | Pnpt1/Rpp   |
| GO_BP_m1GO:00024  | dendritic c   | 2/2606  | 16/23843  | 0.535018 | 0.751217 | 0.714325 | Calr/Gpr18  |
| GO_BP_m1GO:000322 | ventricular   | 2/2606  | 16/23843  | 0.535018 | 0.751217 | 0.714325 | Dll4/Ube4k  |
| GO_BP_m1GO:00033  | regulation    | 2/2606  | 16/23843  | 0.535018 | 0.751217 | 0.714325 | Bbs2/Dnaa   |
| GO_BP_m1GO:00066  | phosphatic    | 2/2606  | 16/23843  | 0.535018 | 0.751217 | 0.714325 | Fabp5/Fgf7  |
| GO_BP_m1GO:000687 | cellular co   | 2/2606  | 16/23843  | 0.535018 | 0.751217 | 0.714325 | Atp7b/Slc3  |
| GO_BP_m1GO:00068  | Golgi to en   | 2/2606  | 16/23843  | 0.535018 | 0.751217 | 0.714325 | Gbf1/Rbsn   |
| GO_BP_m1GO:000751 | adult heart   | 2/2606  | 16/23843  | 0.535018 | 0.751217 | 0.714325 | Myh7/Slc2:  |
| GO_BP_m1GO:00076  | mechanos      | 2/2606  | 16/23843  | 0.535018 | 0.751217 | 0.714325 | Abl2/Strbp  |
| GO_BP_m1GO:001404 | regulation    | 2/2606  | 16/23843  | 0.535018 | 0.751217 | 0.714325 | Ednrb/Rac:  |
| GO_BP_m1GO:00217  | striatum d    | 2/2606  | 16/23843  | 0.535018 | 0.751217 | 0.714325 | Aldh1a3/Bl  |
| GO_BP_m1GO:00319  | corticoster   | 2/2606  | 16/23843  | 0.535018 | 0.751217 | 0.714325 | Arntl/Clock |
| GO_BP_m1GO:00323  | positive re   | 2/2606  | 16/23843  | 0.535018 | 0.751217 | 0.714325 | P2ry2/Tnfs: |
| GO_BP_m1GO:003231 | prostaglan    | 2/2606  | 16/23843  | 0.535018 | 0.751217 | 0.714325 | P2ry2/Tnfs: |
| GO_BP_m1GO:00324  | negative re   | 2/2606  | 16/23843  | 0.535018 | 0.751217 | 0.714325 | Oprd1/Pex   |
| GO_BP_m1GO:003251 | positive re   | 2/2606  | 16/23843  | 0.535018 | 0.751217 | 0.714325 | Akap6/Ptp:  |
| GO_BP_m1GO:00326  | negative re   | 2/2606  | 16/23843  | 0.535018 | 0.751217 | 0.714325 | Mefv/Zc3h   |
| GO_BP_m1GO:00352  | protein ma    | 2/2606  | 16/23843  | 0.535018 | 0.751217 | 0.714325 | Nus1/Pom:   |
| GO_BP_m1GO:00425  | pteridine-c   | 2/2606  | 16/23843  | 0.535018 | 0.751217 | 0.714325 | Gch1/Mthf   |
| GO_BP_m1GO:004264 | anagen        | 2/2606  | 16/23843  | 0.535018 | 0.751217 | 0.714325 | Krtap21-1/  |
| GO_BP_m1GO:00447  | multi-orga    | 2/2606  | 16/23843  | 0.535018 | 0.751217 | 0.714325 | Cav1/Fmr1   |
| GO_BP_m1GO:004554 | regulation    | 2/2606  | 16/23843  | 0.535018 | 0.751217 | 0.714325 | Fgf1/Por    |
| GO_BP_m1GO:00458  | positive re   | 2/2606  | 16/23843  | 0.535018 | 0.751217 | 0.714325 | Dmrt1/Fbx   |
| GO_BP_m1GO:00482  | negative re   | 2/2606  | 16/23843  | 0.535018 | 0.751217 | 0.714325 | Fmr1/Pcsk:  |
| GO_BP_m1GO:004871 | positive re   | 2/2606  | 16/23843  | 0.535018 | 0.751217 | 0.714325 | Prpf19/Ttb  |
| GO_BP_m1GO:005112 | positive re   | 2/2606  | 16/23843  | 0.535018 | 0.751217 | 0.714325 | Gsn/Wipf1   |
| GO_BP_m1GO:00511  | positive re   | 2/2606  | 16/23843  | 0.535018 | 0.751217 | 0.714325 | Esrrb/Myc   |
| GO_BP_m1GO:006097 | vasculogen    | 2/2606  | 16/23843  | 0.535018 | 0.751217 | 0.714325 | Fgf1/Zfpm:  |
| GO_BP_m1GO:007081 | phosphory     | 2/2606  | 16/23843  | 0.535018 | 0.751217 | 0.714325 | Ccnl1/Gtf2l |
| GO_BP_m1GO:00714  | cellular res  | 2/2606  | 16/23843  | 0.535018 | 0.751217 | 0.714325 | Ptgs2/Spp:  |
| GO_BP_m1GO:007162 | vocalizatio   | 2/2606  | 16/23843  | 0.535018 | 0.751217 | 0.714325 | Myh14/Nl    |
| GO_BP_m1GO:00971  | mesenchyr     | 2/2606  | 16/23843  | 0.535018 | 0.751217 | 0.714325 | Tbx1/Wt1    |
| GO_BP_m1GO:19011  | primary ar    | 2/2606  | 16/23843  | 0.535018 | 0.751217 | 0.714325 | Gch1/Htr1:  |
| GO_BP_m1GO:19021  | positive re   | 2/2606  | 16/23843  | 0.535018 | 0.751217 | 0.714325 | Pcx/Vapb    |
| GO_BP_m1GO:190257 | multi-orga    | 2/2606  | 16/23843  | 0.535018 | 0.751217 | 0.714325 | Cav1/Fmr1   |
| GO_BP_m1GO:19035  | protein loc   | 2/2606  | 16/23843  | 0.535018 | 0.751217 | 0.714325 | Arhgap44/   |
| GO_BP_m1GO:190354 | regulation    | 2/2606  | 16/23843  | 0.535018 | 0.751217 | 0.714325 | Park2/Smp   |

|                                      |           |          |          |          |             |
|--------------------------------------|-----------|----------|----------|----------|-------------|
| GO_BP_m1GO:190515regulation 2/2606   | 16/23843  | 0.535018 | 0.751217 | 0.714325 | Cd36/Ncka   |
| GO_BP_m1GO:199084adaptive th2/2606   | 16/23843  | 0.535018 | 0.751217 | 0.714325 | Pm20d1/Tr   |
| GO_BP_m1GO:200034regulation 2/2606   | 16/23843  | 0.535018 | 0.751217 | 0.714325 | lfng/Wnt3a  |
| GO_BP_m1GO:200035regulation 2/2606   | 16/23843  | 0.535018 | 0.751217 | 0.714325 | Dand5/Wn    |
| GO_BP_m1GO:000206columnar/c8/2606    | 72/23843  | 0.536024 | 0.751217 | 0.714325 | Arntl/Cdh1  |
| GO_BP_m1GO:000854fibroblast c8/2606  | 72/23843  | 0.536024 | 0.751217 | 0.714325 | Ctgf/Fgf1/f |
| GO_BP_m1GO:002188forebrain c8/2606   | 72/23843  | 0.536024 | 0.751217 | 0.714325 | Arx/Cdk5/f  |
| GO_BP_m1GO:003050regulation 8/2606   | 72/23843  | 0.536024 | 0.751217 | 0.714325 | Ank/Bglap3  |
| GO_BP_m1GO:004225ribosome a8/2606    | 72/23843  | 0.536024 | 0.751217 | 0.714325 | Dhx30/Eral  |
| GO_BP_m1GO:005087positive re24/2606  | 220/23843 | 0.536173 | 0.751217 | 0.714325 | Cdkn1a/Gp   |
| GO_BP_m1GO:200123negative re24/2606  | 220/23843 | 0.536173 | 0.751217 | 0.714325 | Bok/Dapk1   |
| GO_BP_m1GO:004566positive re47/2606  | 432/23843 | 0.53671  | 0.751217 | 0.714325 | Abl2/Ache   |
| GO_BP_m1GO:005512digestive s15/2606  | 137/23843 | 0.537771 | 0.751217 | 0.714325 | Cdh1/Cdkr   |
| GO_BP_m1GO:007169anatomical 19/2606  | 174/23843 | 0.537881 | 0.751217 | 0.714325 | Abl2/C1ql1  |
| GO_BP_m1GO:003227regulation 23/2606  | 211/23843 | 0.538365 | 0.751217 | 0.714325 | Ankrd53/C   |
| GO_BP_m1GO:000718adenylate c11/2606  | 100/23843 | 0.538439 | 0.751217 | 0.714325 | Adgrd1/Ac   |
| GO_BP_m1GO:005088endocrine j11/2606  | 100/23843 | 0.538439 | 0.751217 | 0.714325 | Avpr1a/C1   |
| GO_BP_m1GO:004215lipoprotein 14/2606 | 128/23843 | 0.540909 | 0.751217 | 0.714325 | Apobec1/A   |
| GO_BP_m1GO:000931oligosacch7/2606    | 63/23843  | 0.541105 | 0.751217 | 0.714325 | Pgghg/Gal   |
| GO_BP_m1GO:003003lamellipodi 7/2606  | 63/23843  | 0.541105 | 0.751217 | 0.714325 | Arhgef7/Cf  |
| GO_BP_m1GO:190247chloride tra7/2606  | 63/23843  | 0.541105 | 0.751217 | 0.714325 | Ano1/Clcn   |
| GO_BP_m1GO:000150neurotrans 4/2606   | 35/23843  | 0.541577 | 0.751217 | 0.714325 | Arl6ip5/Gd  |
| GO_BP_m1GO:000673one-carbo 4/2606    | 35/23843  | 0.541577 | 0.751217 | 0.714325 | Ahcyl2/Ma   |
| GO_BP_m1GO:000709mitotic spir 4/2606 | 35/23843  | 0.541577 | 0.751217 | 0.714325 | Klhl22/Mac  |
| GO_BP_m1GO:000995proximal/d 4/2606   | 35/23843  | 0.541577 | 0.751217 | 0.714325 | Hoxd10/Irx  |
| GO_BP_m1GO:003222regulation 4/2606   | 35/23843  | 0.541577 | 0.751217 | 0.714325 | Adora1/Nf   |
| GO_BP_m1GO:003577positive re4/2606   | 35/23843  | 0.541577 | 0.751217 | 0.714325 | Ano1/Mpc    |
| GO_BP_m1GO:004255pteridine-c 4/2606  | 35/23843  | 0.541577 | 0.751217 | 0.714325 | Gch1/Mthf   |
| GO_BP_m1GO:005145intracellula 4/2606 | 35/23843  | 0.541577 | 0.751217 | 0.714325 | Atp6v0c/A   |
| GO_BP_m1GO:005196positive re4/2606   | 35/23843  | 0.541577 | 0.751217 | 0.714325 | Cacng5/Ca   |
| GO_BP_m1GO:005197positive re4/2606   | 35/23843  | 0.541577 | 0.751217 | 0.714325 | Hmbox1/M    |
| GO_BP_m1GO:007117spindle ass 4/2606  | 35/23843  | 0.541577 | 0.751217 | 0.714325 | Klhl22/Mac  |
| GO_BP_m1GO:009002regulation 4/2606   | 35/23843  | 0.541577 | 0.751217 | 0.714325 | Mospd2/M    |
| GO_BP_m1GO:190197regulation 4/2606   | 35/23843  | 0.541577 | 0.751217 | 0.714325 | Cul4a/Nek   |
| GO_BP_m1GO:190435positive re4/2606   | 35/23843  | 0.541577 | 0.751217 | 0.714325 | Atr/Cct3/H  |
| GO_BP_m1GO:200017negative re4/2606   | 35/23843  | 0.541577 | 0.751217 | 0.714325 | Cyth2/Dnr   |
| GO_BP_m1GO:001082positive re6/2606   | 54/23843  | 0.547194 | 0.751217 | 0.714325 | Adipor2/Ac  |
| GO_BP_m1GO:004406regulation 6/2606   | 54/23843  | 0.547194 | 0.751217 | 0.714325 | C1qtnf3/Cr  |
| GO_BP_m1GO:006019positive re6/2606   | 54/23843  | 0.547194 | 0.751217 | 0.714325 | Abl2/Adcy   |
| GO_BP_m1GO:004860reproductiv48/2606  | 443/23843 | 0.548654 | 0.751217 | 0.714325 | Ccdc182/A   |
| GO_BP_m1GO:000202desensitiza 3/2606  | 26/23843  | 0.552048 | 0.751217 | 0.714325 | Adm/Drd3    |
| GO_BP_m1GO:000206chondrocyt3/2606    | 26/23843  | 0.552048 | 0.751217 | 0.714325 | Rflna/Mia3  |
| GO_BP_m1GO:000673NADH met 3/2606     | 26/23843  | 0.552048 | 0.751217 | 0.714325 | ldh3a/Ldh   |
| GO_BP_m1GO:000959detection c 3/2606  | 26/23843  | 0.552048 | 0.751217 | 0.714325 | Nod1/Scar   |
| GO_BP_m1GO:001016response tr3/2606   | 26/23843  | 0.552048 | 0.751217 | 0.714325 | Blm/Kars/N  |
| GO_BP_m1GO:001082negative re3/2606   | 26/23843  | 0.552048 | 0.751217 | 0.714325 | Fabp5/Myc   |
| GO_BP_m1GO:002201myelinatior 3/2606  | 26/23843  | 0.552048 | 0.751217 | 0.714325 | Ahnak2/Lg   |
| GO_BP_m1GO:002240negative ac 3/2606  | 26/23843  | 0.552048 | 0.751217 | 0.714325 | Adm/Drd3    |

|                                      |           |          |          |          |             |
|--------------------------------------|-----------|----------|----------|----------|-------------|
| GO_BP_m1GO:003031melanocyte3/2606    | 26/23843  | 0.552048 | 0.751217 | 0.714325 | Adamts9/E   |
| GO_BP_m1GO:003129T cell costir3/2606 | 26/23843  | 0.552048 | 0.751217 | 0.714325 | Cav1/Cd80   |
| GO_BP_m1GO:003229peripheral 3/2606   | 26/23843  | 0.552048 | 0.751217 | 0.714325 | Ahnak2/Lg   |
| GO_BP_m1GO:003301tetrapyrrolo3/2606  | 26/23843  | 0.552048 | 0.751217 | 0.714325 | Cox15/Iba5  |
| GO_BP_m1GO:00345Ccentromere3/2606    | 26/23843  | 0.552048 | 0.751217 | 0.714325 | Cenpa/Cer   |
| GO_BP_m1GO:00400Cestablishm3/2606    | 26/23843  | 0.552048 | 0.751217 | 0.714325 | Cenpa/Nus   |
| GO_BP_m1GO:00459Epositive re3/2606   | 26/23843  | 0.552048 | 0.751217 | 0.714325 | Catsper3/C  |
| GO_BP_m1GO:005071positive re3/2606   | 26/23843  | 0.552048 | 0.751217 | 0.714325 | Gsdmd/Ifn   |
| GO_BP_m1GO:006003pharyngeal3/2606    | 26/23843  | 0.552048 | 0.751217 | 0.714325 | Nog/Plxna   |
| GO_BP_m1GO:006006uterus dev3/2606    | 26/23843  | 0.552048 | 0.751217 | 0.714325 | Cdh1/Cdkr   |
| GO_BP_m1GO:007007histone lysi3/2606  | 26/23843  | 0.552048 | 0.751217 | 0.714325 | Kdm2b/Kd    |
| GO_BP_m1GO:00713Ecellular res3/2606  | 26/23843  | 0.552048 | 0.751217 | 0.714325 | Cfl1/Gab1/  |
| GO_BP_m1GO:00714Ecellular res3/2606  | 26/23843  | 0.552048 | 0.751217 | 0.714325 | Atr/Cdkn1   |
| GO_BP_m1GO:00718Eadenylate 3/2606    | 26/23843  | 0.552048 | 0.751217 | 0.714325 | Adra1d/At   |
| GO_BP_m1GO:009016regulation 3/2606   | 26/23843  | 0.552048 | 0.751217 | 0.714325 | Chmp1b/H    |
| GO_BP_m1GO:190299regulation 3/2606   | 26/23843  | 0.552048 | 0.751217 | 0.714325 | C330021F2   |
| GO_BP_m1GO:19043Eregulation 3/2606   | 26/23843  | 0.552048 | 0.751217 | 0.714325 | Nabp2/Tnk   |
| GO_BP_m1GO:190464response tr3/2606   | 26/23843  | 0.552048 | 0.751217 | 0.714325 | Cd36/Cdk5   |
| GO_BP_m1GO:200031regulation 3/2606   | 26/23843  | 0.552048 | 0.751217 | 0.714325 | Cacng5/Ca   |
| GO_BP_m1GO:200077positive re3/2606   | 26/23843  | 0.552048 | 0.751217 | 0.714325 | Hyal2/Pyca  |
| GO_BP_m1GO:00071Ehomophilic11/2606   | 101/23843 | 0.552239 | 0.751217 | 0.714325 | Cadm1/Cd    |
| GO_BP_m1GO:004544endothelial11/2606  | 101/23843 | 0.552239 | 0.751217 | 0.714325 | Alox12/Cld  |
| GO_BP_m1GO:00435Cpositive re8/2606   | 73/23843  | 0.552257 | 0.751217 | 0.714325 | Gab1/Il1m   |
| GO_BP_m1GO:00905C RNA phos8/2606     | 73/23843  | 0.552257 | 0.751217 | 0.714325 | Bms1/Cpsf   |
| GO_BP_m1GO:003103actomyosir21/2606   | 194/23843 | 0.553067 | 0.751217 | 0.714325 | Acta1/Cav   |
| GO_BP_m1GO:000752myoblast fi5/2606   | 45/23843  | 0.554749 | 0.751217 | 0.714325 | Cav3/Cxcl1  |
| GO_BP_m1GO:000863intrinsic ap 5/2606 | 45/23843  | 0.554749 | 0.751217 | 0.714325 | Arl6ip5/Gp  |
| GO_BP_m1GO:00308Enegative re5/2606   | 45/23843  | 0.554749 | 0.751217 | 0.714325 | Cav1/Ifn    |
| GO_BP_m1GO:00420ET-helper 1 5/2606   | 45/23843  | 0.554749 | 0.751217 | 0.714325 | Il12b/Il18b |
| GO_BP_m1GO:004632positive re5/2606   | 45/23843  | 0.554749 | 0.751217 | 0.714325 | Adipor2/Cr  |
| GO_BP_m1GO:004801vascular en5/2606   | 45/23843  | 0.554749 | 0.751217 | 0.714325 | Bcar1/Foxc  |
| GO_BP_m1GO:005089multicellula5/2606  | 45/23843  | 0.554749 | 0.751217 | 0.714325 | Abca12/Alc  |
| GO_BP_m1GO:00713Ecellular res5/2606  | 45/23843  | 0.554749 | 0.751217 | 0.714325 | Eif4e/Gdnf  |
| GO_BP_m1GO:190262regulation 5/2606   | 45/23843  | 0.554749 | 0.751217 | 0.714325 | Adam8/Mc    |
| GO_BP_m1GO:000044endonucle1/2606     | 7/23843   | 0.555288 | 0.751217 | 0.714325 | Kri1        |
| GO_BP_m1GO:000207optic cup n1/2606   | 7/23843   | 0.555288 | 0.751217 | 0.714325 | Aldh1a3     |
| GO_BP_m1GO:00021Eosteoclast 1/2606   | 7/23843   | 0.555288 | 0.751217 | 0.714325 | Tnfsf11     |
| GO_BP_m1GO:000219cap-indep1/2606     | 7/23843   | 0.555288 | 0.751217 | 0.714325 | Ythdf2      |
| GO_BP_m1GO:000237dendritic c1/2606   | 7/23843   | 0.555288 | 0.751217 | 0.714325 | Jak3        |
| GO_BP_m1GO:000257platelet de1/2606   | 7/23843   | 0.555288 | 0.751217 | 0.714325 | P2rx1       |
| GO_BP_m1GO:00025Eregulation 1/2606   | 7/23843   | 0.555288 | 0.751217 | 0.714325 | Pycard      |
| GO_BP_m1GO:00026Cregulation 1/2606   | 7/23843   | 0.555288 | 0.751217 | 0.714325 | Nod1        |
| GO_BP_m1GO:000292positive re1/2606   | 7/23843   | 0.555288 | 0.751217 | 0.714325 | Ptpnc       |
| GO_BP_m1GO:000302regulation 1/2606   | 7/23843   | 0.555288 | 0.751217 | 0.714325 | Adra1d      |
| GO_BP_m1GO:00030Eregulation 1/2606   | 7/23843   | 0.555288 | 0.751217 | 0.714325 | Cav1        |
| GO_BP_m1GO:000312heart induc1/2606   | 7/23843   | 0.555288 | 0.751217 | 0.714325 | Wnt3a       |
| GO_BP_m1GO:00031Eendocardiu1/2606    | 7/23843   | 0.555288 | 0.751217 | 0.714325 | Sox18       |
| GO_BP_m1GO:00031Etricuspid va1/2606  | 7/23843   | 0.555288 | 0.751217 | 0.714325 | Zfpm2       |

|                                      |         |          |          |          |          |
|--------------------------------------|---------|----------|----------|----------|----------|
| GO_BP_m1GO:000334cardiac enc1/2606   | 7/23843 | 0.555288 | 0.751217 | 0.714325 | Sox18    |
| GO_BP_m1GO:00059εdisaccharid1/2606   | 7/23843 | 0.555288 | 0.751217 | 0.714325 | Pgghg    |
| GO_BP_m1GO:00061Cmalate met1/2606    | 7/23843 | 0.555288 | 0.751217 | 0.714325 | Me3      |
| GO_BP_m1GO:00062εpyrimidine 1/2606   | 7/23843 | 0.555288 | 0.751217 | 0.714325 | Polh     |
| GO_BP_m1GO:000652arginine bir1/2606  | 7/23843 | 0.555288 | 0.751217 | 0.714325 | Otc      |
| GO_BP_m1GO:000654histidine m1/2606   | 7/23843 | 0.555288 | 0.751217 | 0.714325 | Hdc      |
| GO_BP_m1GO:000657valine metε1/2606   | 7/23843 | 0.555288 | 0.751217 | 0.714325 | Bcat2    |
| GO_BP_m1GO:000661ribosomal j1/2606   | 7/23843 | 0.555288 | 0.751217 | 0.714325 | Ipo11    |
| GO_BP_m1GO:000662protein prc1/2606   | 7/23843 | 0.555288 | 0.751217 | 0.714325 | Uqrc2    |
| GO_BP_m1GO:00066εgalactosylc1/2606   | 7/23843 | 0.555288 | 0.751217 | 0.714325 | B4galt3  |
| GO_BP_m1GO:000672tetrahydro1/2606    | 7/23843 | 0.555288 | 0.751217 | 0.714325 | Gch1     |
| GO_BP_m1GO:000702tubulin cor1/2606   | 7/23843 | 0.555288 | 0.751217 | 0.714325 | Tbca     |
| GO_BP_m1GO:00080εToll signalir1/2606 | 7/23843 | 0.555288 | 0.751217 | 0.714325 | Peli3    |
| GO_BP_m1GO:00082εacetylcholinr1/2606 | 7/23843 | 0.555288 | 0.751217 | 0.714325 | Ache     |
| GO_BP_m1GO:000914purine nucle1/2606  | 7/23843 | 0.555288 | 0.751217 | 0.714325 | Nudt1    |
| GO_BP_m1GO:00091εpurine deo1/2606    | 7/23843 | 0.555288 | 0.751217 | 0.714325 | Nudt1    |
| GO_BP_m1GO:000941response tr1/2606   | 7/23843 | 0.555288 | 0.751217 | 0.714325 | Atp2b4   |
| GO_BP_m1GO:000944putrescine 1/2606   | 7/23843 | 0.555288 | 0.751217 | 0.714325 | Agmat    |
| GO_BP_m1GO:00105εregulation 1/2606   | 7/23843 | 0.555288 | 0.751217 | 0.714325 | Il12b    |
| GO_BP_m1GO:001061negative re1/2606   | 7/23843 | 0.555288 | 0.751217 | 0.714325 | Atp2b4   |
| GO_BP_m1GO:001064regulation 1/2606   | 7/23843 | 0.555288 | 0.751217 | 0.714325 | Cav1     |
| GO_BP_m1GO:00107εnegative re1/2606   | 7/23843 | 0.555288 | 0.751217 | 0.714325 | Ddt      |
| GO_BP_m1GO:00109εnegative re1/2606   | 7/23843 | 0.555288 | 0.751217 | 0.714325 | Pcsk9    |
| GO_BP_m1GO:00109εubiquitin re1/2606  | 7/23843 | 0.555288 | 0.751217 | 0.714325 | Park2    |
| GO_BP_m1GO:00140εpositive reε1/2606  | 7/23843 | 0.555288 | 0.751217 | 0.714325 | Htr6     |
| GO_BP_m1GO:00140εregulation 1/2606   | 7/23843 | 0.555288 | 0.751217 | 0.714325 | Cartpt   |
| GO_BP_m1GO:001582ornithine tr1/2606  | 7/23843 | 0.555288 | 0.751217 | 0.714325 | AU018091 |
| GO_BP_m1GO:00160εrhodopsin 1/2606    | 7/23843 | 0.555288 | 0.751217 | 0.714325 | Opn4     |
| GO_BP_m1GO:00161εglycoside c1/2606   | 7/23843 | 0.555288 | 0.751217 | 0.714325 | Abhd10   |
| GO_BP_m1GO:001647negative re1/2606   | 7/23843 | 0.555288 | 0.751217 | 0.714325 | H2afy    |
| GO_BP_m1GO:002157hindbrain r1/2606   | 7/23843 | 0.555288 | 0.751217 | 0.714325 | Cend1    |
| GO_BP_m1GO:002162central ner1/2606   | 7/23843 | 0.555288 | 0.751217 | 0.714325 | Cend1    |
| GO_BP_m1GO:00219Ccommitme1/2606      | 7/23843 | 0.555288 | 0.751217 | 0.714325 | Tbr1     |
| GO_BP_m1GO:00219εneural platir1/2606 | 7/23843 | 0.555288 | 0.751217 | 0.714325 | Nog      |
| GO_BP_m1GO:003071germ-line r1/2606   | 7/23843 | 0.555288 | 0.751217 | 0.714325 | Nanos2   |
| GO_BP_m1GO:003111tRNA pseu1/2606     | 7/23843 | 0.555288 | 0.751217 | 0.714325 | Rpusd1   |
| GO_BP_m1GO:00312εregulation 1/2606   | 7/23843 | 0.555288 | 0.751217 | 0.714325 | Guca1a   |
| GO_BP_m1GO:00319εnegative re1/2606   | 7/23843 | 0.555288 | 0.751217 | 0.714325 | Apobec1  |
| GO_BP_m1GO:003207negative re1/2606   | 7/23843 | 0.555288 | 0.751217 | 0.714325 | Dffa     |
| GO_BP_m1GO:00328Clacrimal glε1/2606  | 7/23843 | 0.555288 | 0.751217 | 0.714325 | Foxc1    |
| GO_BP_m1GO:003327cell prolifer1/2606 | 7/23843 | 0.555288 | 0.751217 | 0.714325 | Wnt3a    |
| GO_BP_m1GO:003331meiotic cel1/2606   | 7/23843 | 0.555288 | 0.751217 | 0.714325 | Ttk      |
| GO_BP_m1GO:00334εgas homec1/2606     | 7/23843 | 0.555288 | 0.751217 | 0.714325 | Cav1     |
| GO_BP_m1GO:00335Cfloor plate 1/2606  | 7/23843 | 0.555288 | 0.751217 | 0.714325 | Stil     |
| GO_BP_m1GO:00338εregulation 1/2606   | 7/23843 | 0.555288 | 0.751217 | 0.714325 | Drd5     |
| GO_BP_m1GO:003414negative re1/2606   | 7/23843 | 0.555288 | 0.751217 | 0.714325 | Ticam2   |
| GO_BP_m1GO:00349εpeptidyl-ly1/2606   | 7/23843 | 0.555288 | 0.751217 | 0.714325 | Sirt3    |
| GO_BP_m1GO:00353εlong-chain1/2606    | 7/23843 | 0.555288 | 0.751217 | 0.714325 | Dgat1    |

|                                      |         |          |          |          |          |
|--------------------------------------|---------|----------|----------|----------|----------|
| GO_BP_m1GO:00353Ecellular trig1/2606 | 7/23843 | 0.555288 | 0.751217 | 0.714325 | C1qtnf3  |
| GO_BP_m1GO:00355Epurinergic 1/2606   | 7/23843 | 0.555288 | 0.751217 | 0.714325 | P2ry1    |
| GO_BP_m1GO:00357Chematopoi 1/2606    | 7/23843 | 0.555288 | 0.751217 | 0.714325 | Ptpnc    |
| GO_BP_m1GO:003574T-helper 1 1/2606   | 7/23843 | 0.555288 | 0.751217 | 0.714325 | Il12b    |
| GO_BP_m1GO:00357E B cell chem 1/2606 | 7/23843 | 0.555288 | 0.751217 | 0.714325 | Hsd3b7   |
| GO_BP_m1GO:00360Ecleavage ft 1/2606  | 7/23843 | 0.555288 | 0.751217 | 0.714325 | Snx9     |
| GO_BP_m1GO:00361Ehistone H3 1/2606   | 7/23843 | 0.555288 | 0.751217 | 0.714325 | Dmrtc2   |
| GO_BP_m1GO:00362Epeptidyl-se 1/2606  | 7/23843 | 0.555288 | 0.751217 | 0.714325 | Prkca    |
| GO_BP_m1GO:00363Catrioventric 1/2606 | 7/23843 | 0.555288 | 0.751217 | 0.714325 | Has2     |
| GO_BP_m1GO:003647neuron de 1/2606    | 7/23843 | 0.555288 | 0.751217 | 0.714325 | Il10     |
| GO_BP_m1GO:00364Eregulation 1/2606   | 7/23843 | 0.555288 | 0.751217 | 0.714325 | Nck2     |
| GO_BP_m1GO:00364EeiF2alpha 1/2606    | 7/23843 | 0.555288 | 0.751217 | 0.714325 | Nck2     |
| GO_BP_m1GO:00381Cnodal sign 1/2606   | 7/23843 | 0.555288 | 0.751217 | 0.714325 | Dand5    |
| GO_BP_m1GO:00426Eregulation 1/2606   | 7/23843 | 0.555288 | 0.751217 | 0.714325 | Wnt3a    |
| GO_BP_m1GO:00427E DNA dama 1/2606    | 7/23843 | 0.555288 | 0.751217 | 0.714325 | Nek1     |
| GO_BP_m1GO:00436E polyadenyl 1/2606  | 7/23843 | 0.555288 | 0.751217 | 0.714325 | Exosc9   |
| GO_BP_m1GO:00443E macropino 1/2606   | 7/23843 | 0.555288 | 0.751217 | 0.714325 | Pycard   |
| GO_BP_m1GO:00450C DNA deam 1/2606    | 7/23843 | 0.555288 | 0.751217 | 0.714325 | Apobec1  |
| GO_BP_m1GO:00450Eprotein im 1/2606   | 7/23843 | 0.555288 | 0.751217 | 0.714325 | Timm22   |
| GO_BP_m1GO:00456E negative re 1/2606 | 7/23843 | 0.555288 | 0.751217 | 0.714325 | Myc      |
| GO_BP_m1GO:004571regulation 1/2606   | 7/23843 | 0.555288 | 0.751217 | 0.714325 | Sec24a   |
| GO_BP_m1GO:004591positive re 1/2606  | 7/23843 | 0.555288 | 0.751217 | 0.714325 | Abat     |
| GO_BP_m1GO:004591negative re 1/2606  | 7/23843 | 0.555288 | 0.751217 | 0.714325 | Susd4    |
| GO_BP_m1GO:00459Epositive re 1/2606  | 7/23843 | 0.555288 | 0.751217 | 0.714325 | Abat     |
| GO_BP_m1GO:00468E negative re 1/2606 | 7/23843 | 0.555288 | 0.751217 | 0.714325 | Cdk5     |
| GO_BP_m1GO:00480E post-embr 1/2606   | 7/23843 | 0.555288 | 0.751217 | 0.714325 | Mir23a   |
| GO_BP_m1GO:00480E eye pigme 1/2606   | 7/23843 | 0.555288 | 0.751217 | 0.714325 | Spns2    |
| GO_BP_m1GO:00482Eregulation 1/2606   | 7/23843 | 0.555288 | 0.751217 | 0.714325 | Nsd2     |
| GO_BP_m1GO:00483E negative re 1/2606 | 7/23843 | 0.555288 | 0.751217 | 0.714325 | Calr     |
| GO_BP_m1GO:00515Epositive re 1/2606  | 7/23843 | 0.555288 | 0.751217 | 0.714325 | Park2    |
| GO_BP_m1GO:00516Epointed-er 1/2606   | 7/23843 | 0.555288 | 0.751217 | 0.714325 | Tmod3    |
| GO_BP_m1GO:00517E negative re 1/2606 | 7/23843 | 0.555288 | 0.751217 | 0.714325 | Smo      |
| GO_BP_m1GO:00518Eregulation 1/2606   | 7/23843 | 0.555288 | 0.751217 | 0.714325 | Wnt3a    |
| GO_BP_m1GO:00519E negative re 1/2606 | 7/23843 | 0.555288 | 0.751217 | 0.714325 | Avpr1a   |
| GO_BP_m1GO:00600E convergent 1/2606  | 7/23843 | 0.555288 | 0.751217 | 0.714325 | Zfp568   |
| GO_BP_m1GO:00602E lens induct 1/2606 | 7/23843 | 0.555288 | 0.751217 | 0.714325 | Sox2     |
| GO_BP_m1GO:00602E negative re 1/2606 | 7/23843 | 0.555288 | 0.751217 | 0.714325 | Npr2     |
| GO_BP_m1GO:00602Eregulation 1/2606   | 7/23843 | 0.555288 | 0.751217 | 0.714325 | Bbs2     |
| GO_BP_m1GO:00602Eregulation 1/2606   | 7/23843 | 0.555288 | 0.751217 | 0.714325 | Bbs2     |
| GO_BP_m1GO:006031definitive e 1/2606 | 7/23843 | 0.555288 | 0.751217 | 0.714325 | Senp1    |
| GO_BP_m1GO:00603Eregulation 1/2606   | 7/23843 | 0.555288 | 0.751217 | 0.714325 | Cav1     |
| GO_BP_m1GO:00605C positive re 1/2606 | 7/23843 | 0.555288 | 0.751217 | 0.714325 | Fgf7     |
| GO_BP_m1GO:006061fat pad dev 1/2606  | 7/23843 | 0.555288 | 0.751217 | 0.714325 | Tbl1xr1  |
| GO_BP_m1GO:00607E mammary 1/2606     | 7/23843 | 0.555288 | 0.751217 | 0.714325 | Slc12a2  |
| GO_BP_m1GO:00607E negative re 1/2606 | 7/23843 | 0.555288 | 0.751217 | 0.714325 | Serpinf1 |
| GO_BP_m1GO:006104regulation 1/2606   | 7/23843 | 0.555288 | 0.751217 | 0.714325 | Pdgfra   |
| GO_BP_m1GO:006107regulation 1/2606   | 7/23843 | 0.555288 | 0.751217 | 0.714325 | Dll4     |
| GO_BP_m1GO:00611E pulmonary 1/2606   | 7/23843 | 0.555288 | 0.751217 | 0.714325 | Jag1     |

|                                               |         |          |          |          |          |
|-----------------------------------------------|---------|----------|----------|----------|----------|
| GO_BP_m1GO:006143renal system1/2606           | 7/23843 | 0.555288 | 0.751217 | 0.714325 | Pdgfra   |
| GO_BP_m1GO:006143kidney vasculature1/2606     | 7/23843 | 0.555288 | 0.751217 | 0.714325 | Pdgfra   |
| GO_BP_m1GO:006148hematopoiesis1/2606          | 7/23843 | 0.555288 | 0.751217 | 0.714325 | Tet2     |
| GO_BP_m1GO:007014synaptic vesicle1/2606       | 7/23843 | 0.555288 | 0.751217 | 0.714325 | Dnm3     |
| GO_BP_m1GO:007099NADPH oxidase1/2606          | 7/23843 | 0.555288 | 0.751217 | 0.714325 | Fmo2     |
| GO_BP_m1GO:007116establishment of1/2606       | 7/23843 | 0.555288 | 0.751217 | 0.714325 | H2afy    |
| GO_BP_m1GO:007136cellular response to1/2606   | 7/23843 | 0.555288 | 0.751217 | 0.714325 | Zc3h12a  |
| GO_BP_m1GO:007144regulation of1/2606          | 7/23843 | 0.555288 | 0.751217 | 0.714325 | Kat2b    |
| GO_BP_m1GO:007163negative regulation of1/2606 | 7/23843 | 0.555288 | 0.751217 | 0.714325 | C1qtnf3  |
| GO_BP_m1GO:007190determination of1/2606       | 7/23843 | 0.555288 | 0.751217 | 0.714325 | Dnaaf1   |
| GO_BP_m1GO:007205S-shaped body1/2606          | 7/23843 | 0.555288 | 0.751217 | 0.714325 | Wt1      |
| GO_BP_m1GO:007216mesenchymal cell1/2606       | 7/23843 | 0.555288 | 0.751217 | 0.714325 | Osr1     |
| GO_BP_m1GO:007228metanephros1/2606            | 7/23843 | 0.555288 | 0.751217 | 0.714325 | Lgr4     |
| GO_BP_m1GO:007234rescue of signaling1/2606    | 7/23843 | 0.555288 | 0.751217 | 0.714325 | Nemf     |
| GO_BP_m1GO:009026positive regulation of1/2606 | 7/23843 | 0.555288 | 0.751217 | 0.714325 | Tpr      |
| GO_BP_m1GO:009040stress-induced1/2606         | 7/23843 | 0.555288 | 0.751217 | 0.714325 | Arntl    |
| GO_BP_m1GO:009704dendritic cell1/2606         | 7/23843 | 0.555288 | 0.751217 | 0.714325 | Jak3     |
| GO_BP_m1GO:009728keratinocyte1/2606           | 7/23843 | 0.555288 | 0.751217 | 0.714325 | Gsn      |
| GO_BP_m1GO:009747motor neuron1/2606           | 7/23843 | 0.555288 | 0.751217 | 0.714325 | Nhs1     |
| GO_BP_m1GO:009890regulation of1/2606          | 7/23843 | 0.555288 | 0.751217 | 0.714325 | Cav1     |
| GO_BP_m1GO:009891retrograde signaling1/2606   | 7/23843 | 0.555288 | 0.751217 | 0.714325 | Ntf5     |
| GO_BP_m1GO:009900calmodulin1/2606             | 7/23843 | 0.555288 | 0.751217 | 0.714325 | Camk2a   |
| GO_BP_m1GO:190008regulation of1/2606          | 7/23843 | 0.555288 | 0.751217 | 0.714325 | Cav1     |
| GO_BP_m1GO:190009regulation of1/2606          | 7/23843 | 0.555288 | 0.751217 | 0.714325 | Dand5    |
| GO_BP_m1GO:190012positive regulation of1/2606 | 7/23843 | 0.555288 | 0.751217 | 0.714325 | Anxa2    |
| GO_BP_m1GO:190016nodal signaling1/2606        | 7/23843 | 0.555288 | 0.751217 | 0.714325 | Dand5    |
| GO_BP_m1GO:190061acetate esterase1/2606       | 7/23843 | 0.555288 | 0.751217 | 0.714325 | Ache     |
| GO_BP_m1GO:190153regulation of1/2606          | 7/23843 | 0.555288 | 0.751217 | 0.714325 | Usp7     |
| GO_BP_m1GO:190172regulation of1/2606          | 7/23843 | 0.555288 | 0.751217 | 0.714325 | BC004004 |
| GO_BP_m1GO:190201regulation of1/2606          | 7/23843 | 0.555288 | 0.751217 | 0.714325 | Bbs2     |
| GO_BP_m1GO:190217regulation of1/2606          | 7/23843 | 0.555288 | 0.751217 | 0.714325 | Gsn      |
| GO_BP_m1GO:190217positive regulation of1/2606 | 7/23843 | 0.555288 | 0.751217 | 0.714325 | Ralbp1   |
| GO_BP_m1GO:190233negative regulation of1/2606 | 7/23843 | 0.555288 | 0.751217 | 0.714325 | Foxc1    |
| GO_BP_m1GO:190251regulation of1/2606          | 7/23843 | 0.555288 | 0.751217 | 0.714325 | Cacnb2   |
| GO_BP_m1GO:190296regulation of1/2606          | 7/23843 | 0.555288 | 0.751217 | 0.714325 | Ezr      |
| GO_BP_m1GO:190296positive regulation of1/2606 | 7/23843 | 0.555288 | 0.751217 | 0.714325 | Ezr      |
| GO_BP_m1GO:190300positive regulation of1/2606 | 7/23843 | 0.555288 | 0.751217 | 0.714325 | Zc3h12a  |
| GO_BP_m1GO:190302negative regulation of1/2606 | 7/23843 | 0.555288 | 0.751217 | 0.714325 | Zfp593   |
| GO_BP_m1GO:190304protein localization1/2606   | 7/23843 | 0.555288 | 0.751217 | 0.714325 | Flot2    |
| GO_BP_m1GO:190320regulation of1/2606          | 7/23843 | 0.555288 | 0.751217 | 0.714325 | Il10     |
| GO_BP_m1GO:190320negative regulation of1/2606 | 7/23843 | 0.555288 | 0.751217 | 0.714325 | Il10     |
| GO_BP_m1GO:190322regulation of1/2606          | 7/23843 | 0.555288 | 0.751217 | 0.714325 | Col5a1   |
| GO_BP_m1GO:190326positive regulation of1/2606 | 7/23843 | 0.555288 | 0.751217 | 0.714325 | Park2    |
| GO_BP_m1GO:190335L-ornithine1/2606            | 7/23843 | 0.555288 | 0.751217 | 0.714325 | AU018091 |
| GO_BP_m1GO:190466positive regulation of1/2606 | 7/23843 | 0.555288 | 0.751217 | 0.714325 | Cdc20    |
| GO_BP_m1GO:190552negative regulation of1/2606 | 7/23843 | 0.555288 | 0.751217 | 0.714325 | Ddt      |
| GO_BP_m1GO:190577regulation of1/2606          | 7/23843 | 0.555288 | 0.751217 | 0.714325 | Wnt3a    |
| GO_BP_m1GO:190588negative regulation of1/2606 | 7/23843 | 0.555288 | 0.751217 | 0.714325 | Npr2     |

|                                        |           |          |          |          |             |
|----------------------------------------|-----------|----------|----------|----------|-------------|
| GO_BP_m1GO:19059Cregulation 1/2606     | 7/23843   | 0.555288 | 0.751217 | 0.714325 | Wnt3a       |
| GO_BP_m1GO:19059Cregulation 1/2606     | 7/23843   | 0.555288 | 0.751217 | 0.714325 | Cib1        |
| GO_BP_m1GO:199014intrinsic ap 1/2606   | 7/23843   | 0.555288 | 0.751217 | 0.714325 | Bnip3       |
| GO_BP_m1GO:20002Eregulation 1/2606     | 7/23843   | 0.555288 | 0.751217 | 0.714325 | Cib1        |
| GO_BP_m1GO:20002Enegative re1/2606     | 7/23843   | 0.555288 | 0.751217 | 0.714325 | Susd4       |
| GO_BP_m1GO:200034positive re1/2606     | 7/23843   | 0.555288 | 0.751217 | 0.714325 | Wnt3a       |
| GO_BP_m1GO:200051positive re1/2606     | 7/23843   | 0.555288 | 0.751217 | 0.714325 | Calr        |
| GO_BP_m1GO:20006Eregulation 1/2606     | 7/23843   | 0.555288 | 0.751217 | 0.714325 | H19         |
| GO_BP_m1GO:20006Eregulation 1/2606     | 7/23843   | 0.555288 | 0.751217 | 0.714325 | Jak3        |
| GO_BP_m1GO:20006Cpositive re1/2606     | 7/23843   | 0.555288 | 0.751217 | 0.714325 | Gdnf        |
| GO_BP_m1GO:20007Cregulation 1/2606     | 7/23843   | 0.555288 | 0.751217 | 0.714325 | Pdgfra      |
| GO_BP_m1GO:20007Cpositive re1/2606     | 7/23843   | 0.555288 | 0.751217 | 0.714325 | Ythdf2      |
| GO_BP_m1GO:200097regulation 1/2606     | 7/23843   | 0.555288 | 0.751217 | 0.714325 | Flcn        |
| GO_BP_m1GO:200101mesenchyr 1/2606      | 7/23843   | 0.555288 | 0.751217 | 0.714325 | Osr1        |
| GO_BP_m1GO:200104positive re1/2606     | 7/23843   | 0.555288 | 0.751217 | 0.714325 | Endog       |
| GO_BP_m1GO:000222toll-like rec10/2606  | 92/23843  | 0.556894 | 0.753136 | 0.716151 | Cactin/Cav  |
| GO_BP_m1GO:00064C RNA expor 10/2606    | 92/23843  | 0.556894 | 0.753136 | 0.716151 | Ddx19b/Nr   |
| GO_BP_m1GO:19035Cregulation 13/2606    | 120/23843 | 0.556964 | 0.753136 | 0.716151 | Arih2/Cdk5  |
| GO_BP_m1GO:000681sodium ion23/2606     | 213/23843 | 0.557423 | 0.753641 | 0.716631 | Atp1b2/At   |
| GO_BP_m1GO:003081positive re7/2606     | 64/23843  | 0.558395 | 0.75449  | 0.717438 | Calcr/Esrrb |
| GO_BP_m1GO:00326Cinterleukin 7/2606    | 64/23843  | 0.558395 | 0.75449  | 0.717438 | Cactin/Hya  |
| GO_BP_m1GO:00507Cpositive re7/2606     | 64/23843  | 0.558395 | 0.75449  | 0.717438 | Bcr/Calr/Cc |
| GO_BP_m1GO:190037positive re7/2606     | 64/23843  | 0.558395 | 0.75449  | 0.717438 | Calcr/Esrrb |
| GO_BP_m1GO:00487Cmesenchyr 22/2606     | 204/23843 | 0.56012  | 0.756704 | 0.719544 | Cfl1/Ednrb  |
| GO_BP_m1GO:001657histone ac15/2606     | 139/23843 | 0.561315 | 0.758203 | 0.720968 | Brpf3/Nat8  |
| GO_BP_m1GO:19030Cnegative re9/2606     | 83/23843  | 0.562172 | 0.759243 | 0.721958 | Abat/Alox1  |
| GO_BP_m1GO:00034C axis elonga4/2606    | 36/23843  | 0.564598 | 0.759891 | 0.722574 | Nat8f3/Fgf  |
| GO_BP_m1GO:00108Cpositive re4/2606     | 36/23843  | 0.564598 | 0.759891 | 0.722574 | Cav3/Mmp    |
| GO_BP_m1GO:003081positive re4/2606     | 36/23843  | 0.564598 | 0.759891 | 0.722574 | Adm/Calcr   |
| GO_BP_m1GO:00328Eregulation 4/2606     | 36/23843  | 0.564598 | 0.759891 | 0.722574 | Esrrb/Has2  |
| GO_BP_m1GO:00429E amyloid pr4/2606     | 36/23843  | 0.564598 | 0.759891 | 0.722574 | Aph1a/C3E   |
| GO_BP_m1GO:00468C lipid phosp4/2606    | 36/23843  | 0.564598 | 0.759891 | 0.722574 | Bpnt1/Dgk   |
| GO_BP_m1GO:00468C phospholi4/2606      | 36/23843  | 0.564598 | 0.759891 | 0.722574 | Ephx2/Plp   |
| GO_BP_m1GO:00486C neuron fat4/2606     | 36/23843  | 0.564598 | 0.759891 | 0.722574 | Dbx1/Dmrt   |
| GO_BP_m1GO:004882 erythrocyte4/2606    | 36/23843  | 0.564598 | 0.759891 | 0.722574 | Bpgm/Lyar   |
| GO_BP_m1GO:00507Cregulation 4/2606     | 36/23843  | 0.564598 | 0.759891 | 0.722574 | Gsdmd/Ifn   |
| GO_BP_m1GO:00511Enegative re4/2606     | 36/23843  | 0.564598 | 0.759891 | 0.722574 | Cav3/Cxcl1  |
| GO_BP_m1GO:007132cellular res4/2606    | 36/23843  | 0.564598 | 0.759891 | 0.722574 | Akap6/Crh   |
| GO_BP_m1GO:19033Cpositive re14/2606    | 130/23843 | 0.565213 | 0.759891 | 0.722574 | Arih2/Bcap  |
| GO_BP_m1GO:00326Cregulation 6/2606     | 55/23843  | 0.565776 | 0.759891 | 0.722574 | Abl2/Btnl2  |
| GO_BP_m1GO:00380Epeptidyl-ty6/2606     | 55/23843  | 0.565776 | 0.759891 | 0.722574 | Aatk/Abl2/  |
| GO_BP_m1GO:004642negative re6/2606     | 55/23843  | 0.565776 | 0.759891 | 0.722574 | Cav1/Dcn/   |
| GO_BP_m1GO:004657positive re6/2606     | 55/23843  | 0.565776 | 0.759891 | 0.722574 | Abra/Gpr1   |
| GO_BP_m1GO:00860C cardiac mu6/2606     | 55/23843  | 0.565776 | 0.759891 | 0.722574 | Akap6/Cac   |
| GO_BP_m1GO:19048Cnegative re6/2606     | 55/23843  | 0.565776 | 0.759891 | 0.722574 | Cav1/Dcn/   |
| GO_BP_m1GO:000682chloride tra11/2606   | 102/23843 | 0.565882 | 0.759891 | 0.722574 | Abcb1a/Ar   |
| GO_BP_m1GO:19030C organelle c11/2606   | 102/23843 | 0.565882 | 0.759891 | 0.722574 | Atg2a/Bnip  |
| GO_BP_m1GO:00095C fertilization20/2606 | 186/23843 | 0.565981 | 0.759891 | 0.722574 | 1700016DC   |



|                               |        |          |          |          |          |            |
|-------------------------------|--------|----------|----------|----------|----------|------------|
| GO_BP_m1GO:000231B cell activ | 8/2606 | 74/23843 | 0.56825  | 0.759891 | 0.722574 | Ap1f/Dock1 |
| GO_BP_m1GO:000906aerobic res  | 8/2606 | 74/23843 | 0.56825  | 0.759891 | 0.722574 | Bnip3/Cox4 |
| GO_BP_m1GO:009873import acrc  | 8/2606 | 74/23843 | 0.56825  | 0.759891 | 0.722574 | Arl6ip5/AU |
| GO_BP_m1GO:000192positive re  | 2/2606 | 17/23843 | 0.568707 | 0.759891 | 0.722574 | Anxa2/Snc  |
| GO_BP_m1GO:000257regulation   | 2/2606 | 17/23843 | 0.568707 | 0.759891 | 0.722574 | Nod1/Pyca  |
| GO_BP_m1GO:000283positive re  | 2/2606 | 17/23843 | 0.568707 | 0.759891 | 0.722574 | Il12b/Ulbp |
| GO_BP_m1GO:000283positive re  | 2/2606 | 17/23843 | 0.568707 | 0.759891 | 0.722574 | Il12b/Ulbp |
| GO_BP_m1GO:000341growth pla   | 2/2606 | 17/23843 | 0.568707 | 0.759891 | 0.722574 | Poc1a/Por  |
| GO_BP_m1GO:000606acetyl-CoA   | 2/2606 | 17/23843 | 0.568707 | 0.759891 | 0.722574 | Mpc2/Pdh   |
| GO_BP_m1GO:000670C21-steroi   | 2/2606 | 17/23843 | 0.568707 | 0.759891 | 0.722574 | Dgkq/Ppar  |
| GO_BP_m1GO:000697DNA dama     | 2/2606 | 17/23843 | 0.568707 | 0.759891 | 0.722574 | Cdkn1a/Tf  |
| GO_BP_m1GO:000709regulation   | 2/2606 | 17/23843 | 0.568707 | 0.759891 | 0.722574 | Cdkn1c/Ma  |
| GO_BP_m1GO:000720activation   | 2/2606 | 17/23843 | 0.568707 | 0.759891 | 0.722574 | Adcyap1r1  |
| GO_BP_m1GO:000735blastoderm   | 2/2606 | 17/23843 | 0.568707 | 0.759891 | 0.722574 | Sema3f/Wt  |
| GO_BP_m1GO:000921cyclic nucle | 2/2606 | 17/23843 | 0.568707 | 0.759891 | 0.722574 | Pde11a/Pd  |
| GO_BP_m1GO:001096regulation   | 2/2606 | 17/23843 | 0.568707 | 0.759891 | 0.722574 | Anxa2/Pcs  |
| GO_BP_m1GO:002166cerebellar   | 2/2606 | 17/23843 | 0.568707 | 0.759891 | 0.722574 | Cend1/Wn   |
| GO_BP_m1GO:003001maintenan    | 2/2606 | 17/23843 | 0.568707 | 0.759891 | 0.722574 | Lrrd1/Ncka |
| GO_BP_m1GO:003081positive re  | 2/2606 | 17/23843 | 0.568707 | 0.759891 | 0.722574 | Esrrb/Myc  |
| GO_BP_m1GO:003149chromatin    | 2/2606 | 17/23843 | 0.568707 | 0.759891 | 0.722574 | Map1s/Sm   |
| GO_BP_m1GO:003164positive re  | 2/2606 | 17/23843 | 0.568707 | 0.759891 | 0.722574 | Mir23a/Nr  |
| GO_BP_m1GO:003240melanoson    | 2/2606 | 17/23843 | 0.568707 | 0.759891 | 0.722574 | Bloc1s5/Ra |
| GO_BP_m1GO:003293positive re  | 2/2606 | 17/23843 | 0.568707 | 0.759891 | 0.722574 | Fpr2/Ilgam |
| GO_BP_m1GO:003360negative re  | 2/2606 | 17/23843 | 0.568707 | 0.759891 | 0.722574 | Abat/P2ry1 |
| GO_BP_m1GO:003414regulation   | 2/2606 | 17/23843 | 0.568707 | 0.759891 | 0.722574 | Ptpn22/Tic |
| GO_BP_m1GO:003465nucleobase   | 2/2606 | 17/23843 | 0.568707 | 0.759891 | 0.722574 | Dera/Dpyd  |
| GO_BP_m1GO:003551histone H2   | 2/2606 | 17/23843 | 0.568707 | 0.759891 | 0.722574 | Kdm2b/Rin  |
| GO_BP_m1GO:003558calcium-m    | 2/2606 | 17/23843 | 0.568707 | 0.759891 | 0.722574 | Bcap31/Cc  |
| GO_BP_m1GO:004248regulation   | 2/2606 | 17/23843 | 0.568707 | 0.759891 | 0.722574 | Ift88/Wnt1 |
| GO_BP_m1GO:004275negative re  | 2/2606 | 17/23843 | 0.568707 | 0.759891 | 0.722574 | Adora1/Hti |
| GO_BP_m1GO:004432response tr  | 2/2606 | 17/23843 | 0.568707 | 0.759891 | 0.722574 | Bbs2/Mt3   |
| GO_BP_m1GO:004560positive re  | 2/2606 | 17/23843 | 0.568707 | 0.759891 | 0.722574 | Alox12/Vez |
| GO_BP_m1GO:004565negative re  | 2/2606 | 17/23843 | 0.568707 | 0.759891 | 0.722574 | Cib1/Prmt1 |
| GO_BP_m1GO:004836lateral mes  | 2/2606 | 17/23843 | 0.568707 | 0.759891 | 0.722574 | Dand5/Sm   |
| GO_BP_m1GO:005065chondroitir  | 2/2606 | 17/23843 | 0.568707 | 0.759891 | 0.722574 | Chst13/Csc |
| GO_BP_m1GO:005507copper ion   | 2/2606 | 17/23843 | 0.568707 | 0.759891 | 0.722574 | Atp7b/Slc3 |
| GO_BP_m1GO:006008membrane     | 2/2606 | 17/23843 | 0.568707 | 0.759891 | 0.722574 | Kcnq2/Kcn  |
| GO_BP_m1GO:007082heterochro   | 2/2606 | 17/23843 | 0.568707 | 0.759891 | 0.722574 | Bahd1/Tpr  |
| GO_BP_m1GO:008601membrane     | 2/2606 | 17/23843 | 0.568707 | 0.759891 | 0.722574 | Cacnb2/Ca  |
| GO_BP_m1GO:009003regulation   | 2/2606 | 17/23843 | 0.568707 | 0.759891 | 0.722574 | Sez6l2/Ulk |
| GO_BP_m1GO:190225regulation   | 2/2606 | 17/23843 | 0.568707 | 0.759891 | 0.722574 | Akap6/Kcn  |
| GO_BP_m1GO:190320positive re  | 2/2606 | 17/23843 | 0.568707 | 0.759891 | 0.722574 | Endog/Ralt |
| GO_BP_m1GO:190359positive re  | 2/2606 | 17/23843 | 0.568707 | 0.759891 | 0.722574 | Bnip3/Park |
| GO_BP_m1GO:190435positive re  | 2/2606 | 17/23843 | 0.568707 | 0.759891 | 0.722574 | Nabp2/Tnk  |
| GO_BP_m1GO:190531semi-lunar   | 2/2606 | 17/23843 | 0.568707 | 0.759891 | 0.722574 | Jag1/Smad  |
| GO_BP_m1GO:200064regulation   | 2/2606 | 17/23843 | 0.568707 | 0.759891 | 0.722574 | Dnajc13/Ez |
| GO_BP_m1GO:200069regulation   | 2/2606 | 17/23843 | 0.568707 | 0.759891 | 0.722574 | Gdnf/Osr1  |
| GO_BP_m1GO:200084regulation   | 2/2606 | 17/23843 | 0.568707 | 0.759891 | 0.722574 | Galr1/Tac1 |

|                                       |           |          |          |          |              |
|---------------------------------------|-----------|----------|----------|----------|--------------|
| GO_BP_m1GO:000669steroid bio:16/2606  | 149/23843 | 0.569002 | 0.76017  | 0.722839 | Dgkq/Fdft1   |
| GO_BP_m1GO:199013neuron prc19/2606    | 177/23843 | 0.569183 | 0.760295 | 0.722958 | Aatk/Cdk5,   |
| GO_BP_m1GO:000991epidermal ,22/2606   | 205/23843 | 0.569744 | 0.760929 | 0.723561 | Abca12/Ce    |
| GO_BP_m1GO:002178glial cell de10/2606 | 93/23843  | 0.571138 | 0.762676 | 0.725222 | Ahnak2/Cc    |
| GO_BP_m1GO:190305positive reç12/2606  | 112/23843 | 0.574154 | 0.766048 | 0.728428 | Arih2/Bcap   |
| GO_BP_m1GO:000024spliceosom5/2606     | 46/23843  | 0.574964 | 0.766048 | 0.728428 | Prpf19/Psiç  |
| GO_BP_m1GO:000232natural killç5/2606  | 46/23843  | 0.574964 | 0.766048 | 0.728428 | Gm13271/I    |
| GO_BP_m1GO:000641tRNA amin 5/2606     | 46/23843  | 0.574964 | 0.766048 | 0.728428 | Kars/Lrrc47  |
| GO_BP_m1GO:000699nuclear en\5/2606    | 46/23843  | 0.574964 | 0.766048 | 0.728428 | Lemd2/Ler    |
| GO_BP_m1GO:003052intracellula 5/2606  | 46/23843  | 0.574964 | 0.766048 | 0.728428 | Ddrgk1/Ka    |
| GO_BP_m1GO:003166lipopolysac 5/2606   | 46/23843  | 0.574964 | 0.766048 | 0.728428 | Cactin/Irak  |
| GO_BP_m1GO:00323Cicosanoid s5/2606    | 46/23843  | 0.574964 | 0.766048 | 0.728428 | Drd3/P2ryç   |
| GO_BP_m1GO:003503sperm-egç5/2606      | 46/23843  | 0.574964 | 0.766048 | 0.728428 | Cct3/Fetub   |
| GO_BP_m1GO:004226regulation 5/2606    | 46/23843  | 0.574964 | 0.766048 | 0.728428 | Cadm1/Il1ç   |
| GO_BP_m1GO:005118cofactor ca5/2606    | 46/23843  | 0.574964 | 0.766048 | 0.728428 | Gpx1/Prdx:   |
| GO_BP_m1GO:007252purine-cor 5/2606    | 46/23843  | 0.574964 | 0.766048 | 0.728428 | Dpyd/Gda/    |
| GO_BP_m1GO:009881modulator 5/2606     | 46/23843  | 0.574964 | 0.766048 | 0.728428 | Nlgn3/Park   |
| GO_BP_m1GO:190265secondary 5/2606     | 46/23843  | 0.574964 | 0.766048 | 0.728428 | Fdft1/Fgf1/  |
| GO_BP_m1GO:006145reproductiv48/2606   | 447/23843 | 0.574972 | 0.766048 | 0.728428 | Ccdc182/A    |
| GO_BP_m1GO:000253production 7/2606    | 65/23843  | 0.575387 | 0.766137 | 0.728513 | Alox5/D1Ei   |
| GO_BP_m1GO:00063C DNA alkyla 7/2606   | 65/23843  | 0.575387 | 0.766137 | 0.728513 | Ddx4/Fkbp    |
| GO_BP_m1GO:00063C DNA meth\7/2606     | 65/23843  | 0.575387 | 0.766137 | 0.728513 | Ddx4/Fkbp    |
| GO_BP_m1GO:001657histone de\7/2606    | 65/23843  | 0.575387 | 0.766137 | 0.728513 | BC004004/    |
| GO_BP_m1GO:00002C protein pol20/2606  | 187/23843 | 0.576019 | 0.766745 | 0.729092 | Arih2/Cdc2   |
| GO_BP_m1GO:001623macroauto 20/2606    | 187/23843 | 0.576019 | 0.766745 | 0.729092 | Atg2a/Bniç   |
| GO_BP_m1GO:000276immune re 47/2606    | 438/23843 | 0.576709 | 0.766951 | 0.729288 | 5730559C1    |
| GO_BP_m1GO:19029C regulation 36/2606  | 336/23843 | 0.576949 | 0.766951 | 0.729288 | Ankrd53/C    |
| GO_BP_m1GO:005507transition n14/2606  | 131/23843 | 0.577182 | 0.766951 | 0.729288 | Atp7b/Bdh    |
| GO_BP_m1GO:000206glandular ç3/2606    | 27/23843  | 0.578444 | 0.766951 | 0.729288 | Arntl/Clock  |
| GO_BP_m1GO:000314outflow tra 3/2606   | 27/23843  | 0.578444 | 0.766951 | 0.729288 | Smad6/Tb>    |
| GO_BP_m1GO:000651protein qu:3/2606    | 27/23843  | 0.578444 | 0.766951 | 0.729288 | Lonp2/Ufd    |
| GO_BP_m1GO:000709nuclear miç3/2606    | 27/23843  | 0.578444 | 0.766951 | 0.729288 | Dock7/Pafa   |
| GO_BP_m1GO:00076C phototrans 3/2606   | 27/23843  | 0.578444 | 0.766951 | 0.729288 | Guca1a/Oç    |
| GO_BP_m1GO:000907aromatic aı3/2606    | 27/23843  | 0.578444 | 0.766951 | 0.729288 | Dct/Hpdl/T   |
| GO_BP_m1GO:00093C 2'-deoxyrik 3/2606  | 27/23843  | 0.578444 | 0.766951 | 0.729288 | Adk/Nudt1    |
| GO_BP_m1GO:001657histone deı3/2606    | 27/23843  | 0.578444 | 0.766951 | 0.729288 | Kdm2b/Kd     |
| GO_BP_m1GO:001969deoxyribos 3/2606    | 27/23843  | 0.578444 | 0.766951 | 0.729288 | Adk/Nudt1    |
| GO_BP_m1GO:003087thyroid gla 3/2606   | 27/23843  | 0.578444 | 0.766951 | 0.729288 | Foxe1/Hox    |
| GO_BP_m1GO:00323ç negative re3/2606   | 27/23843  | 0.578444 | 0.766951 | 0.729288 | Igfbp3/Nr1   |
| GO_BP_m1GO:003264regulation 3/2606    | 27/23843  | 0.578444 | 0.766951 | 0.729288 | Mmp12/Nr     |
| GO_BP_m1GO:00326ç regulation 3/2606   | 27/23843  | 0.578444 | 0.766951 | 0.729288 | Igng/Il12b/I |
| GO_BP_m1GO:003368osteoblast 3/2606    | 27/23843  | 0.578444 | 0.766951 | 0.729288 | Cthrc1/Eif2  |
| GO_BP_m1GO:00342C amyloid-bç3/2606    | 27/23843  | 0.578444 | 0.766951 | 0.729288 | Aph1a/C3ç    |
| GO_BP_m1GO:00346ç ncRNA cat:3/2606    | 27/23843  | 0.578444 | 0.766951 | 0.729288 | Exosc9/Pnç   |
| GO_BP_m1GO:004211neutrophil 3/2606    | 27/23843  | 0.578444 | 0.766951 | 0.729288 | Anxa3/Bcr/   |
| GO_BP_m1GO:005071positive reç3/2606   | 27/23843  | 0.578444 | 0.766951 | 0.729288 | Gsdmd/Ifnç   |
| GO_BP_m1GO:00602ç regulation 3/2606   | 27/23843  | 0.578444 | 0.766951 | 0.729288 | Cand1/Psr    |
| GO_BP_m1GO:006034trabecula fı3/2606   | 27/23843  | 0.578444 | 0.766951 | 0.729288 | Adamts1/C    |

|                                       |           |          |          |          |              |
|---------------------------------------|-----------|----------|----------|----------|--------------|
| GO_BP_m1GO:007136cellular res3/2606   | 27/23843  | 0.578444 | 0.766951 | 0.729288 | Kcnmb1/M     |
| GO_BP_m1GO:00901C cochlea mc3/2606    | 27/23843  | 0.578444 | 0.766951 | 0.729288 | Cthrc1/My    |
| GO_BP_m1GO:00902C positive re3/2606   | 27/23843  | 0.578444 | 0.766951 | 0.729288 | Bnip3/Cide   |
| GO_BP_m1GO:001407response tr11/2606   | 103/23843 | 0.579354 | 0.767809 | 0.730104 | Akap6/Asp    |
| GO_BP_m1GO:003051regulation 11/2606   | 103/23843 | 0.579354 | 0.767809 | 0.730104 | Aatk/Cdk5,   |
| GO_BP_m1GO:00435C muscle ad11/2606    | 103/23843 | 0.579354 | 0.767809 | 0.730104 | Adk/Akap6    |
| GO_BP_m1GO:190332positive re13/2606   | 122/23843 | 0.581834 | 0.770981 | 0.733119 | 5730559C1    |
| GO_BP_m1GO:004586negative re37/2606   | 346/23843 | 0.582225 | 0.771383 | 0.733501 | Camk2n1/(    |
| GO_BP_m1GO:002157hindbrain r6/2606    | 56/23843  | 0.583983 | 0.771485 | 0.733599 | Abl2/Cdk5,   |
| GO_BP_m1GO:00311C neuron prc6/2606    | 56/23843  | 0.583983 | 0.771485 | 0.733599 | Adm/Fkbp:    |
| GO_BP_m1GO:003556non-canon6/2606      | 56/23843  | 0.583983 | 0.771485 | 0.733599 | Abl2/Csnk1   |
| GO_BP_m1GO:003314regulation 8/2606    | 75/23843  | 0.583983 | 0.771485 | 0.733599 | Arntl/Calr/( |
| GO_BP_m1GO:005125negative re15/2606   | 141/23843 | 0.584412 | 0.771485 | 0.733599 | Arg1/Cd80    |
| GO_BP_m1GO:007259establishm46/2606    | 430/23843 | 0.585115 | 0.771485 | 0.733599 | 1700123L1    |
| GO_BP_m1GO:003355multicellula10/2606  | 94/23843  | 0.585185 | 0.771485 | 0.733599 | EdnrB/Eif4e  |
| GO_BP_m1GO:003806NIK/NF-ka10/2606     | 94/23843  | 0.585185 | 0.771485 | 0.733599 | C1qtnf3/Ca   |
| GO_BP_m1GO:004691cellular trar10/2606 | 94/23843  | 0.585185 | 0.771485 | 0.733599 | Atp7b/Mt2    |
| GO_BP_m1GO:200006positive re10/2606   | 94/23843  | 0.585185 | 0.771485 | 0.733599 | Arih2/Bcap   |
| GO_BP_m1GO:000164osteoblast 20/2606   | 188/23843 | 0.585971 | 0.771485 | 0.733599 | Bmp3/Noc     |
| GO_BP_m1GO:00017Cendoderm 4/2606      | 37/23843  | 0.586968 | 0.771485 | 0.733599 | Col5a1/Du:   |
| GO_BP_m1GO:00017EB cell hom4/2606     | 37/23843  | 0.586968 | 0.771485 | 0.733599 | Dock10/Nc    |
| GO_BP_m1GO:000205positive re4/2606    | 37/23843  | 0.586968 | 0.771485 | 0.733599 | Myc/Pdgfa    |
| GO_BP_m1GO:000253cytokine pr4/2606    | 37/23843  | 0.586968 | 0.771485 | 0.733599 | D1Ertd622t   |
| GO_BP_m1GO:000285positive re4/2606    | 37/23843  | 0.586968 | 0.771485 | 0.733599 | Arg1/Itgarr  |
| GO_BP_m1GO:000743salivary gla4/2606   | 37/23843  | 0.586968 | 0.771485 | 0.733599 | Cdh1/Fgf7,   |
| GO_BP_m1GO:004209type 2 immr4/2606    | 37/23843  | 0.586968 | 0.771485 | 0.733599 | Arg1/Bcl6b   |
| GO_BP_m1GO:00456C regulation 4/2606   | 37/23843  | 0.586968 | 0.771485 | 0.733599 | Alox12/Jag   |
| GO_BP_m1GO:005502positive re4/2606    | 37/23843  | 0.586968 | 0.771485 | 0.733599 | Akap6/Cdk    |
| GO_BP_m1GO:190262positive re4/2606    | 37/23843  | 0.586968 | 0.771485 | 0.733599 | Adam8/Mc     |
| GO_BP_m1GO:200014regulation 4/2606    | 37/23843  | 0.586968 | 0.771485 | 0.733599 | Bclaf1/Can   |
| GO_BP_m1GO:005077regulation 19/2606   | 179/23843 | 0.589621 | 0.771485 | 0.733599 | Ache/Arhg    |
| GO_BP_m1GO:19028C regulation 13/2606  | 123/23843 | 0.594049 | 0.771485 | 0.733599 | Atp2b4/Cd    |
| GO_BP_m1GO:190465glucose tra13/2606   | 123/23843 | 0.594049 | 0.771485 | 0.733599 | Adipor2/Ac   |
| GO_BP_m1GO:000271regulation 5/2606    | 47/23843  | 0.594685 | 0.771485 | 0.733599 | Cadm1/Il12   |
| GO_BP_m1GO:004564regulation 5/2606    | 47/23843  | 0.594685 | 0.771485 | 0.733599 | Lmo2/Nck2    |
| GO_BP_m1GO:005092negative re5/2606    | 47/23843  | 0.594685 | 0.771485 | 0.733599 | Ddt/Gpr18,   |
| GO_BP_m1GO:007213mesenchyr5/2606      | 47/23843  | 0.594685 | 0.771485 | 0.733599 | Foxc1/Myc    |
| GO_BP_m1GO:000975hormone-r20/2606     | 189/23843 | 0.595832 | 0.771485 | 0.733599 | Acsl1/Adip   |
| GO_BP_m1GO:004269muscle cell40/2606   | 376/23843 | 0.597226 | 0.771485 | 0.733599 | Acta1/Adr    |
| GO_BP_m1GO:200124negative re10/2606   | 95/23843  | 0.599021 | 0.771485 | 0.733599 | Gpx1/Hdac    |
| GO_BP_m1GO:19021C regulation 30/2606  | 283/23843 | 0.599281 | 0.771485 | 0.733599 | Adam8/Cal    |
| GO_BP_m1GO:000704cell-substr:8/2606   | 76/23843  | 0.599438 | 0.771485 | 0.733599 | Bcas3/Cfl1,  |
| GO_BP_m1GO:000307regulation 12/2606   | 114/23843 | 0.599589 | 0.771485 | 0.733599 | Adm/Ador:    |
| GO_BP_m1GO:005115regulation 12/2606   | 114/23843 | 0.599589 | 0.771485 | 0.733599 | Akap6/Cav    |
| GO_BP_m1GO:000157ganglioside2/2606    | 18/23843  | 0.60059  | 0.771485 | 0.733599 | St6galnac1   |
| GO_BP_m1GO:000282positive re2/2606    | 18/23843  | 0.60059  | 0.771485 | 0.733599 | Il12b/Il27ra |
| GO_BP_m1GO:000602glycosamin2/2606     | 18/23843  | 0.60059  | 0.771485 | 0.733599 | Hyal2/Hyal   |
| GO_BP_m1GO:000612mitochond 2/2606     | 18/23843  | 0.60059  | 0.771485 | 0.733599 | Coq9/Nduf    |

|                                       |           |          |          |          |             |
|---------------------------------------|-----------|----------|----------|----------|-------------|
| GO_BP_m1GO:000669leukotriene2/2606    | 18/23843  | 0.60059  | 0.771485 | 0.733599 | Alox5/Ltc4: |
| GO_BP_m1GO:000682copper ion 2/2606    | 18/23843  | 0.60059  | 0.771485 | 0.733599 | Atp7b/Slc3  |
| GO_BP_m1GO:000995dorsal/vent2/2606    | 18/23843  | 0.60059  | 0.771485 | 0.733599 | Lrp4/Smad   |
| GO_BP_m1GO:001081T cell chem 2/2606   | 18/23843  | 0.60059  | 0.771485 | 0.733599 | Cxcl10/Gpr  |
| GO_BP_m1GO:001406regulation 2/2606    | 18/23843  | 0.60059  | 0.771485 | 0.733599 | Hrh3/P2ry1  |
| GO_BP_m1GO:002154dentate gy 2/2606    | 18/23843  | 0.60059  | 0.771485 | 0.733599 | Btg2/Smo    |
| GO_BP_m1GO:003015protein im 2/2606    | 18/23843  | 0.60059  | 0.771485 | 0.733599 | Grpel1/Tim  |
| GO_BP_m1GO:003050negative re2/2606    | 18/23843  | 0.60059  | 0.771485 | 0.733599 | Ccr1/Rflna  |
| GO_BP_m1GO:003195regulation 2/2606    | 18/23843  | 0.60059  | 0.771485 | 0.733599 | Lonp2/Plin  |
| GO_BP_m1GO:003240establishm 2/2606    | 18/23843  | 0.60059  | 0.771485 | 0.733599 | Bloc1s5/Ra  |
| GO_BP_m1GO:003265negative re2/2606    | 18/23843  | 0.60059  | 0.771485 | 0.733599 | Il12b/Jak3  |
| GO_BP_m1GO:003357response tr2/2606    | 18/23843  | 0.60059  | 0.771485 | 0.733599 | Adh1/Spp1   |
| GO_BP_m1GO:003506negative re2/2606    | 18/23843  | 0.60059  | 0.771485 | 0.733599 | Msx3/Snca   |
| GO_BP_m1GO:003508establishm 2/2606    | 18/23843  | 0.60059  | 0.771485 | 0.733599 | Fscn1/Tcf1  |
| GO_BP_m1GO:003593corticoster 2/2606   | 18/23843  | 0.60059  | 0.771485 | 0.733599 | Galr1/Tac1  |
| GO_BP_m1GO:003629interstrand 2/2606   | 18/23843  | 0.60059  | 0.771485 | 0.733599 | Dclre1a/Nu  |
| GO_BP_m1GO:004224establishm 2/2606    | 18/23843  | 0.60059  | 0.771485 | 0.733599 | Cthrc1/Paf1 |
| GO_BP_m1GO:004277DNA dama2/2606       | 18/23843  | 0.60059  | 0.771485 | 0.733599 | Cdkn1a/Tf   |
| GO_BP_m1GO:004547locomotor 2/2606     | 18/23843  | 0.60059  | 0.771485 | 0.733599 | Kcnd2/Opr   |
| GO_BP_m1GO:004617polyol cata 2/2606   | 18/23843  | 0.60059  | 0.771485 | 0.733599 | Synj1/Tkfc  |
| GO_BP_m1GO:004824norepinepl 2/2606    | 18/23843  | 0.60059  | 0.771485 | 0.733599 | Hrh3/P2ry1  |
| GO_BP_m1GO:005096detection c2/2606    | 18/23843  | 0.60059  | 0.771485 | 0.733599 | Grin2b/Htr  |
| GO_BP_m1GO:005115negative re2/2606    | 18/23843  | 0.60059  | 0.771485 | 0.733599 | Ppargc1a/1  |
| GO_BP_m1GO:005190pigment gr2/2606     | 18/23843  | 0.60059  | 0.771485 | 0.733599 | Bloc1s5/Ra  |
| GO_BP_m1GO:006033regulation 2/2606    | 18/23843  | 0.60059  | 0.771485 | 0.733599 | Cactin/Mm   |
| GO_BP_m1GO:006070trophoblas 2/2606    | 18/23843  | 0.60059  | 0.771485 | 0.733599 | E2f7/Plk4   |
| GO_BP_m1GO:007147cellular hy 2/2606   | 18/23843  | 0.60059  | 0.771485 | 0.733599 | Mir7b/Mir5  |
| GO_BP_m1GO:007160monocyte 2/2606      | 18/23843  | 0.60059  | 0.771485 | 0.733599 | C1qtnf3/Tr  |
| GO_BP_m1GO:007163regulation 2/2606    | 18/23843  | 0.60059  | 0.771485 | 0.733599 | C1qtnf3/Tr  |
| GO_BP_m1GO:007207renal vesicl 2/2606  | 18/23843  | 0.60059  | 0.771485 | 0.733599 | Gdnf/Smo    |
| GO_BP_m1GO:009003regulation 2/2606    | 18/23843  | 0.60059  | 0.771485 | 0.733599 | Dgkq/Por    |
| GO_BP_m1GO:190101negative re2/2606    | 18/23843  | 0.60059  | 0.771485 | 0.733599 | Cav1/Cav3   |
| GO_BP_m1GO:190102regulation 2/2606    | 18/23843  | 0.60059  | 0.771485 | 0.733599 | Bok/Tmem    |
| GO_BP_m1GO:190162regulation 2/2606    | 18/23843  | 0.60059  | 0.771485 | 0.733599 | Ccl4/Cxcl10 |
| GO_BP_m1GO:190223negative re2/2606    | 18/23843  | 0.60059  | 0.771485 | 0.733599 | Park2/Ptpn  |
| GO_BP_m1GO:190487regulation 2/2606    | 18/23843  | 0.60059  | 0.771485 | 0.733599 | Cct3/Nop1   |
| GO_BP_m1GO:001046mesenchyr 6/2606     | 57/23843  | 0.601789 | 0.771485 | 0.733599 | Fgf7/Myc/C  |
| GO_BP_m1GO:190370regulation 41/2606   | 386/23843 | 0.601973 | 0.771485 | 0.733599 | Adam8/Ca    |
| GO_BP_m1GO:004516cell fate co 29/2606 | 274/23843 | 0.6021   | 0.771485 | 0.733599 | Arx/Dbx1/L  |
| GO_BP_m1GO:005506monovalen 16/2606    | 152/23843 | 0.60216  | 0.771485 | 0.733599 | Adora1/At   |
| GO_BP_m1GO:000189maternal p 3/2606    | 28/23843  | 0.603837 | 0.771485 | 0.733599 | Cdh1/Ctsl/  |
| GO_BP_m1GO:000602aminoglyc 3/2606     | 28/23843  | 0.603837 | 0.771485 | 0.733599 | Chil5/Hyal2 |
| GO_BP_m1GO:001071negative re3/2606    | 28/23843  | 0.603837 | 0.771485 | 0.733599 | Foxa2/Nog   |
| GO_BP_m1GO:002169cerebellar 3/2606    | 28/23843  | 0.603837 | 0.771485 | 0.733599 | Cdk5/Cenc   |
| GO_BP_m1GO:002305adaptation 3/2606    | 28/23843  | 0.603837 | 0.771485 | 0.733599 | Adm/Drd3,   |
| GO_BP_m1GO:003129lymphocyt 3/2606     | 28/23843  | 0.603837 | 0.771485 | 0.733599 | Cav1/Cd80   |
| GO_BP_m1GO:003260interferon- 3/2606   | 28/23843  | 0.603837 | 0.771485 | 0.733599 | Mmp12/Nr    |
| GO_BP_m1GO:003516embryonic 3/2606     | 28/23843  | 0.603837 | 0.771485 | 0.733599 | Kitl/Lmo2/  |

|                   |                     |          |          |          |          |            |
|-------------------|---------------------|----------|----------|----------|----------|------------|
| GO_BP_m1GO:004203 | negative re3/2606   | 28/23843 | 0.603837 | 0.771485 | 0.733599 | Il10/Nfkb1 |
| GO_BP_m1GO:004365 | post-transl3/2606   | 28/23843 | 0.603837 | 0.771485 | 0.733599 | Esco1/Fln  |
| GO_BP_m1GO:004565 | regulation 3/2606   | 28/23843 | 0.603837 | 0.771485 | 0.733599 | Cib1/Prmt1 |
| GO_BP_m1GO:004685 | phosphatic 3/2606   | 28/23843 | 0.603837 | 0.771485 | 0.733599 | Bpnt1/Pik3 |
| GO_BP_m1GO:004855 | embryonic 3/2606    | 28/23843 | 0.603837 | 0.771485 | 0.733599 | Aldh1a3/Kc |
| GO_BP_m1GO:006003 | pericardiur3/2606   | 28/23843 | 0.603837 | 0.771485 | 0.733599 | Dll4/Mecor |
| GO_BP_m1GO:006044 | branching 3/2606    | 28/23843 | 0.603837 | 0.771485 | 0.733599 | Cav3/Epha  |
| GO_BP_m1GO:007187 | adrenergic 3/2606   | 28/23843 | 0.603837 | 0.771485 | 0.733599 | Adra1d/Atq |
| GO_BP_m1GO:200027 | positive re3/2606   | 28/23843 | 0.603837 | 0.771485 | 0.733599 | Adora1/Cfl |
| GO_BP_m1GO:000176 | membrane 1/2606     | 8/23843  | 0.603908 | 0.771485 | 0.733599 | Gsn        |
| GO_BP_m1GO:000182 | inner cell n1/2606  | 8/23843  | 0.603908 | 0.771485 | 0.733599 | Lats1      |
| GO_BP_m1GO:000215 | cytoplasmic 1/2606  | 8/23843  | 0.603908 | 0.771485 | 0.733599 | Cpeb3      |
| GO_BP_m1GO:000246 | dendritic c1/2606   | 8/23843  | 0.603908 | 0.771485 | 0.733599 | Nod1       |
| GO_BP_m1GO:000271 | negative re1/2606   | 8/23843  | 0.603908 | 0.771485 | 0.733599 | Susd4      |
| GO_BP_m1GO:000285 | negative re1/2606   | 8/23843  | 0.603908 | 0.771485 | 0.733599 | Susd4      |
| GO_BP_m1GO:000317 | tricuspid v1/2606   | 8/23843  | 0.603908 | 0.771485 | 0.733599 | Zfpm2      |
| GO_BP_m1GO:000319 | atrioventric 1/2606 | 8/23843  | 0.603908 | 0.771485 | 0.733599 | Zfpm2      |
| GO_BP_m1GO:000322 | atrial cardi1/2606  | 8/23843  | 0.603908 | 0.771485 | 0.733599 | Nog        |
| GO_BP_m1GO:000333 | regulation 1/2606   | 8/23843  | 0.603908 | 0.771485 | 0.733599 | Gdnf       |
| GO_BP_m1GO:000551 | detection c1/2606   | 8/23843  | 0.603908 | 0.771485 | 0.733599 | Kcnmb1     |
| GO_BP_m1GO:000595 | regulation 1/2606   | 8/23843  | 0.603908 | 0.771485 | 0.733599 | Ppp1r3d    |
| GO_BP_m1GO:000634 | chromatin 1/2606    | 8/23843  | 0.603908 | 0.771485 | 0.733599 | Hat1       |
| GO_BP_m1GO:000664 | phosphatic 1/2606   | 8/23843  | 0.603908 | 0.771485 | 0.733599 | Pisd       |
| GO_BP_m1GO:000697 | hypotonic 1/2606    | 8/23843  | 0.603908 | 0.771485 | 0.733599 | Trpv4      |
| GO_BP_m1GO:000714 | female mei1/2606    | 8/23843  | 0.603908 | 0.771485 | 0.733599 | Fbxo5      |
| GO_BP_m1GO:000740 | negative re1/2606   | 8/23843  | 0.603908 | 0.771485 | 0.733599 | Nf1        |
| GO_BP_m1GO:000821 | spermine n1/2606    | 8/23843  | 0.603908 | 0.771485 | 0.733599 | Sat1       |
| GO_BP_m1GO:000913 | pyrimidine 1/2606   | 8/23843  | 0.603908 | 0.771485 | 0.733599 | Shmt1      |
| GO_BP_m1GO:000920 | deoxyribor 1/2606   | 8/23843  | 0.603908 | 0.771485 | 0.733599 | Nudt1      |
| GO_BP_m1GO:000931 | oligosacchi1/2606   | 8/23843  | 0.603908 | 0.771485 | 0.733599 | Pgghg      |
| GO_BP_m1GO:000995 | negative re1/2606   | 8/23843  | 0.603908 | 0.771485 | 0.733599 | Wnt3a      |
| GO_BP_m1GO:001021 | maintenan1/2606     | 8/23843  | 0.603908 | 0.771485 | 0.733599 | Usp7       |
| GO_BP_m1GO:001045 | positive re1/2606   | 8/23843  | 0.603908 | 0.771485 | 0.733599 | Wnt3a      |
| GO_BP_m1GO:001060 | regulation 1/2606   | 8/23843  | 0.603908 | 0.771485 | 0.733599 | Cnot6l     |
| GO_BP_m1GO:001070 | negative re1/2606   | 8/23843  | 0.603908 | 0.771485 | 0.733599 | P2ry1      |
| GO_BP_m1GO:001095 | regulation 1/2606   | 8/23843  | 0.603908 | 0.771485 | 0.733599 | Arl6ip5    |
| GO_BP_m1GO:001585 | heme trans1/2606    | 8/23843  | 0.603908 | 0.771485 | 0.733599 | Slc46a1    |
| GO_BP_m1GO:001595 | diadenosin 1/2606   | 8/23843  | 0.603908 | 0.771485 | 0.733599 | Kars       |
| GO_BP_m1GO:001605 | polyprenol 1/2606   | 8/23843  | 0.603908 | 0.771485 | 0.733599 | Nus1       |
| GO_BP_m1GO:001655 | nucleosom 1/2606    | 8/23843  | 0.603908 | 0.771485 | 0.733599 | Hist1h1c   |
| GO_BP_m1GO:001715 | peptidyl-ly 1/2606  | 8/23843  | 0.603908 | 0.771485 | 0.733599 | P3h3       |
| GO_BP_m1GO:001834 | protein ger1/2606   | 8/23843  | 0.603908 | 0.771485 | 0.733599 | Fnta       |
| GO_BP_m1GO:001922 | neuronal a1/2606    | 8/23843  | 0.603908 | 0.771485 | 0.733599 | Fkbp1b     |
| GO_BP_m1GO:001937 | galactolipic 1/2606 | 8/23843  | 0.603908 | 0.771485 | 0.733599 | B4galt3    |
| GO_BP_m1GO:001980 | peptide crc 1/2606  | 8/23843  | 0.603908 | 0.771485 | 0.733599 | Dcn        |
| GO_BP_m1GO:002160 | cranial nen 1/2606  | 8/23843  | 0.603908 | 0.771485 | 0.733599 | Atp8b1     |
| GO_BP_m1GO:003024 | skeletal mu 1/2606  | 8/23843  | 0.603908 | 0.771485 | 0.733599 | Acta1      |
| GO_BP_m1GO:003144 | negative re1/2606   | 8/23843  | 0.603908 | 0.771485 | 0.733599 | Supt5      |

|                  |               |        |         |          |          |          |           |
|------------------|---------------|--------|---------|----------|----------|----------|-----------|
| GO_BP_m1GO:00315 | membrane      | 1/2606 | 8/23843 | 0.603908 | 0.771485 | 0.733599 | Gsn       |
| GO_BP_m1GO:00316 | positive re   | 1/2606 | 8/23843 | 0.603908 | 0.771485 | 0.733599 | Prkca     |
| GO_BP_m1GO:00319 | regulation    | 1/2606 | 8/23843 | 0.603908 | 0.771485 | 0.733599 | Dgkq      |
| GO_BP_m1GO:00320 | cardiolipin   | 1/2606 | 8/23843 | 0.603908 | 0.771485 | 0.733599 | Ptpmt1    |
| GO_BP_m1GO:00322 | negative re   | 1/2606 | 8/23843 | 0.603908 | 0.771485 | 0.733599 | Adora1    |
| GO_BP_m1GO:00322 | negative re   | 1/2606 | 8/23843 | 0.603908 | 0.771485 | 0.733599 | Tacr2     |
| GO_BP_m1GO:00324 | regulation    | 1/2606 | 8/23843 | 0.603908 | 0.771485 | 0.733599 | Ppt1      |
| GO_BP_m1GO:00326 | interleukin   | 1/2606 | 8/23843 | 0.603908 | 0.771485 | 0.733599 | lfng      |
| GO_BP_m1GO:00326 | regulation    | 1/2606 | 8/23843 | 0.603908 | 0.771485 | 0.733599 | Ccl20     |
| GO_BP_m1GO:00326 | regulation    | 1/2606 | 8/23843 | 0.603908 | 0.771485 | 0.733599 | lfng      |
| GO_BP_m1GO:00328 | regulation    | 1/2606 | 8/23843 | 0.603908 | 0.771485 | 0.733599 | E2f7      |
| GO_BP_m1GO:00331 | immunogl      | 1/2606 | 8/23843 | 0.603908 | 0.771485 | 0.733599 | Prkdc     |
| GO_BP_m1GO:00332 | meiotic cyt   | 1/2606 | 8/23843 | 0.603908 | 0.771485 | 0.733599 | Washc5    |
| GO_BP_m1GO:00336 | regulation    | 1/2606 | 8/23843 | 0.603908 | 0.771485 | 0.733599 | Tacr2     |
| GO_BP_m1GO:00343 | adherens j    | 1/2606 | 8/23843 | 0.603908 | 0.771485 | 0.733599 | 5730559C1 |
| GO_BP_m1GO:00343 | very-low-c    | 1/2606 | 8/23843 | 0.603908 | 0.771485 | 0.733599 | Dgat1     |
| GO_BP_m1GO:00343 | high-densi    | 1/2606 | 8/23843 | 0.603908 | 0.771485 | 0.733599 | Scarb1    |
| GO_BP_m1GO:00344 | U4 snRNA      | 1/2606 | 8/23843 | 0.603908 | 0.771485 | 0.733599 | Exosc9    |
| GO_BP_m1GO:00346 | cortisol bio  | 1/2606 | 8/23843 | 0.603908 | 0.771485 | 0.733599 | Dgkq      |
| GO_BP_m1GO:00354 | gastric mot   | 1/2606 | 8/23843 | 0.603908 | 0.771485 | 0.733599 | Drd3      |
| GO_BP_m1GO:00355 | regulation    | 1/2606 | 8/23843 | 0.603908 | 0.771485 | 0.733599 | Nckap1l   |
| GO_BP_m1GO:00358 | negative re   | 1/2606 | 8/23843 | 0.603908 | 0.771485 | 0.733599 | Uts2r     |
| GO_BP_m1GO:00359 | dorsal aort   | 1/2606 | 8/23843 | 0.603908 | 0.771485 | 0.733599 | Dll4      |
| GO_BP_m1GO:00364 | regulation    | 1/2606 | 8/23843 | 0.603908 | 0.771485 | 0.733599 | Nck2      |
| GO_BP_m1GO:00380 | positive re   | 1/2606 | 8/23843 | 0.603908 | 0.771485 | 0.733599 | Gab1      |
| GO_BP_m1GO:00380 | Fc-gamma      | 1/2606 | 8/23843 | 0.603908 | 0.771485 | 0.733599 | Oscar     |
| GO_BP_m1GO:00420 | epithelial fl | 1/2606 | 8/23843 | 0.603908 | 0.771485 | 0.733599 | Ednrb     |
| GO_BP_m1GO:00423 | fat-soluble   | 1/2606 | 8/23843 | 0.603908 | 0.771485 | 0.733599 | Crabp1    |
| GO_BP_m1GO:00423 | water-solu    | 1/2606 | 8/23843 | 0.603908 | 0.771485 | 0.733599 | Mmachc    |
| GO_BP_m1GO:00424 | indole-con    | 1/2606 | 8/23843 | 0.603908 | 0.771485 | 0.733599 | Gch1      |
| GO_BP_m1GO:00426 | negative re   | 1/2606 | 8/23843 | 0.603908 | 0.771485 | 0.733599 | Smo       |
| GO_BP_m1GO:00426 | catagen       | 1/2606 | 8/23843 | 0.603908 | 0.771485 | 0.733599 | Ctsl      |
| GO_BP_m1GO:00427 | very long-c   | 1/2606 | 8/23843 | 0.603908 | 0.771485 | 0.733599 | Abcd3     |
| GO_BP_m1GO:00430 | negative re   | 1/2606 | 8/23843 | 0.603908 | 0.771485 | 0.733599 | Cd200     |
| GO_BP_m1GO:00430 | DNA meth      | 1/2606 | 8/23843 | 0.603908 | 0.771485 | 0.733599 | Tet3      |
| GO_BP_m1GO:00436 | dedifferent   | 1/2606 | 8/23843 | 0.603908 | 0.771485 | 0.733599 | Esrrb     |
| GO_BP_m1GO:00436 | cell dediffe  | 1/2606 | 8/23843 | 0.603908 | 0.771485 | 0.733599 | Esrrb     |
| GO_BP_m1GO:00439 | histone H4    | 1/2606 | 8/23843 | 0.603908 | 0.771485 | 0.733599 | Kat2a     |
| GO_BP_m1GO:00443 | Wnt signali   | 1/2606 | 8/23843 | 0.603908 | 0.771485 | 0.733599 | Lrp4      |
| GO_BP_m1GO:00450 | positive re   | 1/2606 | 8/23843 | 0.603908 | 0.771485 | 0.733599 | lfng      |
| GO_BP_m1GO:00456 | positive re   | 1/2606 | 8/23843 | 0.603908 | 0.771485 | 0.733599 | Rcor1     |
| GO_BP_m1GO:00457 | low-densit    | 1/2606 | 8/23843 | 0.603908 | 0.771485 | 0.733599 | Sec24a    |
| GO_BP_m1GO:00460 | cGMP cata     | 1/2606 | 8/23843 | 0.603908 | 0.771485 | 0.733599 | Pde11a    |
| GO_BP_m1GO:00463 | amino sug     | 1/2606 | 8/23843 | 0.603908 | 0.771485 | 0.733599 | Pgm3      |
| GO_BP_m1GO:00481 | autophagic    | 1/2606 | 8/23843 | 0.603908 | 0.771485 | 0.733599 | Bnip3     |
| GO_BP_m1GO:00482 | isotype swi   | 1/2606 | 8/23843 | 0.603908 | 0.771485 | 0.733599 | Nsd2      |
| GO_BP_m1GO:00486 | regulation    | 1/2606 | 8/23843 | 0.603908 | 0.771485 | 0.733599 | Rps6kb1   |
| GO_BP_m1GO:00487 | semicircula   | 1/2606 | 8/23843 | 0.603908 | 0.771485 | 0.733599 | Tbx1      |

|                  |                      |         |          |          |          |         |
|------------------|----------------------|---------|----------|----------|----------|---------|
| GO_BP_m1GO:00508 | voluntary n1/2606    | 8/23843 | 0.603908 | 0.771485 | 0.733599 | Xrcc1   |
| GO_BP_m1GO:00511 | C DNA ligatic1/2606  | 8/23843 | 0.603908 | 0.771485 | 0.733599 | Lig3    |
| GO_BP_m1GO:00514 | E regulation 1/2606  | 8/23843 | 0.603908 | 0.771485 | 0.733599 | Crhbp   |
| GO_BP_m1GO:00550 | C atrial cardi1/2606 | 8/23843 | 0.603908 | 0.771485 | 0.733599 | Nog     |
| GO_BP_m1GO:00600 | 2 convergent1/2606   | 8/23843 | 0.603908 | 0.771485 | 0.733599 | Zfp568  |
| GO_BP_m1GO:00600 | E relaxation c1/2606 | 8/23843 | 0.603908 | 0.771485 | 0.733599 | Adora1  |
| GO_BP_m1GO:00606 | 7 ureteric bu1/2606  | 8/23843 | 0.603908 | 0.771485 | 0.733599 | Fgf1    |
| GO_BP_m1GO:00608 | E lymphatic e1/2606  | 8/23843 | 0.603908 | 0.771485 | 0.733599 | Sox18   |
| GO_BP_m1GO:00608 | E neural plat1/2606  | 8/23843 | 0.603908 | 0.771485 | 0.733599 | Nog     |
| GO_BP_m1GO:00610 | 4 vascular wc1/2606  | 8/23843 | 0.603908 | 0.771485 | 0.733599 | Adipor2 |
| GO_BP_m1GO:00616 | 2 pharyngeal1/2606   | 8/23843 | 0.603908 | 0.771485 | 0.733599 | Nog     |
| GO_BP_m1GO:00618 | 2 telomeric L1/2606  | 8/23843 | 0.603908 | 0.771485 | 0.733599 | Blm     |
| GO_BP_m1GO:00702 | E somatostat1/2606   | 8/23843 | 0.603908 | 0.771485 | 0.733599 | Cartpt  |
| GO_BP_m1GO:00704 | 7 rRNA base 1/2606   | 8/23843 | 0.603908 | 0.771485 | 0.733599 | Nop2    |
| GO_BP_m1GO:00705 | E vitamin D r1/2606  | 8/23843 | 0.603908 | 0.771485 | 0.733599 | Kank2   |
| GO_BP_m1GO:00714 | 2 cellular res1/2606 | 8/23843 | 0.603908 | 0.771485 | 0.733599 | Aoc1    |
| GO_BP_m1GO:00720 | E renal vesicl1/2606 | 8/23843 | 0.603908 | 0.771485 | 0.733599 | Smo     |
| GO_BP_m1GO:00850 | 2 protein K6-1/2606  | 8/23843 | 0.603908 | 0.771485 | 0.733599 | Park2   |
| GO_BP_m1GO:00900 | E negative re1/2606  | 8/23843 | 0.603908 | 0.771485 | 0.733599 | Dnaja4  |
| GO_BP_m1GO:00902 | E positive re1/2606  | 8/23843 | 0.603908 | 0.771485 | 0.733599 | Tpr     |
| GO_BP_m1GO:00902 | E fibroblast c1/2606 | 8/23843 | 0.603908 | 0.771485 | 0.733599 | Ptgs2   |
| GO_BP_m1GO:00902 | 7 regulation 1/2606  | 8/23843 | 0.603908 | 0.771485 | 0.733599 | Ptgs2   |
| GO_BP_m1GO:00903 | E phagosom1/2606     | 8/23843 | 0.603908 | 0.771485 | 0.733599 | Rab34   |
| GO_BP_m1GO:00906 | E telomeric k1/2606  | 8/23843 | 0.603908 | 0.771485 | 0.733599 | Blm     |
| GO_BP_m1GO:00970 | E anterior he1/2606  | 8/23843 | 0.603908 | 0.771485 | 0.733599 | Arsb    |
| GO_BP_m1GO:00973 | 7 interneuror1/2606  | 8/23843 | 0.603908 | 0.771485 | 0.733599 | Mir9-3  |
| GO_BP_m1GO:00974 | 2 protein ma1/2606   | 8/23843 | 0.603908 | 0.771485 | 0.733599 | Isca2   |
| GO_BP_m1GO:00988 | 4 protein tra1/2606  | 8/23843 | 0.603908 | 0.771485 | 0.733599 | Stau2   |
| GO_BP_m1GO:00988 | 7 action pote1/2606  | 8/23843 | 0.603908 | 0.771485 | 0.733599 | Fkbp1b  |
| GO_BP_m1GO:00991 | 11 microtubul1/2606  | 8/23843 | 0.603908 | 0.771485 | 0.733599 | Stau2   |
| GO_BP_m1GO:19000 | 4 regulation 1/2606  | 8/23843 | 0.603908 | 0.771485 | 0.733599 | Ptpn22  |
| GO_BP_m1GO:19002 | 4 regulation 1/2606  | 8/23843 | 0.603908 | 0.771485 | 0.733599 | Cpeb3   |
| GO_BP_m1GO:19003 | E negative re1/2606  | 8/23843 | 0.603908 | 0.771485 | 0.733599 | Supt5   |
| GO_BP_m1GO:19004 | E positive re1/2606  | 8/23843 | 0.603908 | 0.771485 | 0.733599 | Stau2   |
| GO_BP_m1GO:19012 | E negative re1/2606  | 8/23843 | 0.603908 | 0.771485 | 0.733599 | Hsph1   |
| GO_BP_m1GO:19015 | E changes to1/2606   | 8/23843 | 0.603908 | 0.771485 | 0.733599 | Tet3    |
| GO_BP_m1GO:19024 | 1 positive re1/2606  | 8/23843 | 0.603908 | 0.771485 | 0.733599 | Fmr1    |
| GO_BP_m1GO:19028 | E regulation 1/2606  | 8/23843 | 0.603908 | 0.771485 | 0.733599 | Dll4    |
| GO_BP_m1GO:19030 | 1 positive re1/2606  | 8/23843 | 0.603908 | 0.771485 | 0.733599 | Tnfsf11 |
| GO_BP_m1GO:19031 | 4 negative re1/2606  | 8/23843 | 0.603908 | 0.771485 | 0.733599 | Tigar   |
| GO_BP_m1GO:19032 | E regulation 1/2606  | 8/23843 | 0.603908 | 0.771485 | 0.733599 | Ccl28   |
| GO_BP_m1GO:19034 | C protein loc1/2606  | 8/23843 | 0.603908 | 0.771485 | 0.733599 | Cct3    |
| GO_BP_m1GO:19037 | 2 negative re1/2606  | 8/23843 | 0.603908 | 0.771485 | 0.733599 | Pdgfa   |
| GO_BP_m1GO:19037 | 4 negative re1/2606  | 8/23843 | 0.603908 | 0.771485 | 0.733599 | Hsph1   |
| GO_BP_m1GO:19037 | E regulation 1/2606  | 8/23843 | 0.603908 | 0.771485 | 0.733599 | Fxyd1   |
| GO_BP_m1GO:19039 | E regulation 1/2606  | 8/23843 | 0.603908 | 0.771485 | 0.733599 | Dgat1   |
| GO_BP_m1GO:19044 | 1 regulation 1/2606  | 8/23843 | 0.603908 | 0.771485 | 0.733599 | Nod1    |
| GO_BP_m1GO:19044 | 1 positive re1/2606  | 8/23843 | 0.603908 | 0.771485 | 0.733599 | Nod1    |

|                                     |           |          |          |          |              |
|-------------------------------------|-----------|----------|----------|----------|--------------|
| GO_BP_m1GO:190446negative re1/2606  | 8/23843   | 0.603908 | 0.771485 | 0.733599 | Zc3h12a      |
| GO_BP_m1GO:190486protein loc1/2606  | 8/23843   | 0.603908 | 0.771485 | 0.733599 | Cct3         |
| GO_BP_m1GO:190486regulation 1/2606  | 8/23843   | 0.603908 | 0.771485 | 0.733599 | Cct3         |
| GO_BP_m1GO:190487positive re1/2606  | 8/23843   | 0.603908 | 0.771485 | 0.733599 | Cct3         |
| GO_BP_m1GO:190524regulation 1/2606  | 8/23843   | 0.603908 | 0.771485 | 0.733599 | Fmr1         |
| GO_BP_m1GO:200004regulation 1/2606  | 8/23843   | 0.603908 | 0.771485 | 0.733599 | Wnt3a        |
| GO_BP_m1GO:200016regulation 1/2606  | 8/23843   | 0.603908 | 0.771485 | 0.733599 | Atp2b4       |
| GO_BP_m1GO:200030regulation 1/2606  | 8/23843   | 0.603908 | 0.771485 | 0.733599 | Smpd3        |
| GO_BP_m1GO:200031negative re1/2606  | 8/23843   | 0.603908 | 0.771485 | 0.733599 | Smad7        |
| GO_BP_m1GO:200032negative re1/2606  | 8/23843   | 0.603908 | 0.771485 | 0.733599 | Smad7        |
| GO_BP_m1GO:200048negative re1/2606  | 8/23843   | 0.603908 | 0.771485 | 0.733599 | Prkar2b      |
| GO_BP_m1GO:200054negative re1/2606  | 8/23843   | 0.603908 | 0.771485 | 0.733599 | Col5a1       |
| GO_BP_m1GO:200061positive re1/2606  | 8/23843   | 0.603908 | 0.771485 | 0.733599 | Kat2b        |
| GO_BP_m1GO:200064positive re1/2606  | 8/23843   | 0.603908 | 0.771485 | 0.733599 | Ezr          |
| GO_BP_m1GO:001050positive re11/2606 | 105/23843 | 0.605739 | 0.773711 | 0.735716 | Bnip3/Dapl   |
| GO_BP_m1GO:000275immune re45/2606   | 424/23843 | 0.606837 | 0.775001 | 0.736942 | 5730559C1    |
| GO_BP_m1GO:000716establishm22/2606  | 209/23843 | 0.607458 | 0.775682 | 0.737589 | Bcas3/Cenp   |
| GO_BP_m1GO:003087mammary 17/2606    | 162/23843 | 0.608224 | 0.775962 | 0.737856 | Aprt/Atp7b   |
| GO_BP_m1GO:005114smooth m7/2606     | 67/23843  | 0.608399 | 0.775962 | 0.737856 | Adm/Ednrk    |
| GO_BP_m1GO:190486cranial skel7/2606 | 67/23843  | 0.608399 | 0.775962 | 0.737856 | Alx3/Foxe1   |
| GO_BP_m1GO:000940response tr4/2606  | 38/23843  | 0.60865  | 0.775962 | 0.737856 | Dio2/Fcor1   |
| GO_BP_m1GO:001633calcium-de4/2606   | 38/23843  | 0.60865  | 0.775962 | 0.737856 | Cdh1/Cdh2    |
| GO_BP_m1GO:004408regulation 4/2606  | 38/23843  | 0.60865  | 0.775962 | 0.737856 | Anxa2/lft8f  |
| GO_BP_m1GO:004558negative re4/2606  | 38/23843  | 0.60865  | 0.775962 | 0.737856 | Ctla4/Jak3/  |
| GO_BP_m1GO:005043amyloid-b4/2606    | 38/23843  | 0.60865  | 0.775962 | 0.737856 | Apeh/Aph1    |
| GO_BP_m1GO:008600membrane 4/2606    | 38/23843  | 0.60865  | 0.775962 | 0.737856 | Akap6/Atp    |
| GO_BP_m1GO:190165glycosyl co4/2606  | 38/23843  | 0.60865  | 0.775962 | 0.737856 | Adk/Aprt/A   |
| GO_BP_m1GO:190198positive re4/2606  | 38/23843  | 0.60865  | 0.775962 | 0.737856 | Arntl/Fam1   |
| GO_BP_m1GO:000958detection c5/2606  | 48/23843  | 0.613884 | 0.781841 | 0.743446 | Prcd/Guca1   |
| GO_BP_m1GO:001050RNA secon5/2606    | 48/23843  | 0.613884 | 0.781841 | 0.743446 | Ddx19b/Dc    |
| GO_BP_m1GO:001076fibroblast r5/2606 | 48/23843  | 0.613884 | 0.781841 | 0.743446 | Acta2/D1Ei   |
| GO_BP_m1GO:003265regulation 5/2606  | 48/23843  | 0.613884 | 0.781841 | 0.743446 | 5730559C1    |
| GO_BP_m1GO:009865inorganic c5/2606  | 48/23843  | 0.613884 | 0.781841 | 0.743446 | Calcr/Slc31  |
| GO_BP_m1GO:009958inorganic ir5/2606 | 48/23843  | 0.613884 | 0.781841 | 0.743446 | Calcr/Slc31  |
| GO_BP_m1GO:200035regulation 5/2606  | 48/23843  | 0.613884 | 0.781841 | 0.743446 | Abl2/Cd24    |
| GO_BP_m1GO:012003regulation 18/2606 | 172/23843 | 0.614001 | 0.781877 | 0.74348  | Atp8b1/Bc    |
| GO_BP_m1GO:001038regulation 8/2606  | 77/23843  | 0.614601 | 0.782414 | 0.743991 | Blm/Ccng1    |
| GO_BP_m1GO:004324negative re8/2606  | 77/23843  | 0.614601 | 0.782414 | 0.743991 | Cfl1/Cib1/F  |
| GO_BP_m1GO:000864hexose trar13/2606 | 125/23843 | 0.617993 | 0.786617 | 0.747988 | Adipor2/Ac   |
| GO_BP_m1GO:000238immunoglc6/2606    | 58/23843  | 0.619173 | 0.787664 | 0.748983 | Aplf/lfng/Il |
| GO_BP_m1GO:003200negative re6/2606  | 58/23843  | 0.619173 | 0.787664 | 0.748983 | Arntl/Fln/   |
| GO_BP_m1GO:003223positive re6/2606  | 58/23843  | 0.619173 | 0.787664 | 0.748983 | Ctgf/Itgb1k  |
| GO_BP_m1GO:190330positive re6/2606  | 58/23843  | 0.619173 | 0.787664 | 0.748983 | Catsper3/C   |
| GO_BP_m1GO:005114striated m31/2606  | 295/23843 | 0.620066 | 0.788685 | 0.749954 | Acta1/Akap   |
| GO_BP_m1GO:000689post-Golgi 9/2606  | 87/23843  | 0.620457 | 0.788839 | 0.750101 | Ankfy1/Bbs   |
| GO_BP_m1GO:003101pancreas d9/2606   | 87/23843  | 0.620457 | 0.788839 | 0.750101 | Arntl/Clock  |
| GO_BP_m1GO:004632glucose im9/2606   | 87/23843  | 0.620457 | 0.788839 | 0.750101 | Adipor2/Ap   |
| GO_BP_m1GO:004859eye morph 18/2606  | 173/23843 | 0.62407  | 0.793318 | 0.75436  | Aldh1a3/Bc   |



|                               |         |           |          |          |          |              |
|-------------------------------|---------|-----------|----------|----------|----------|--------------|
| GO_BP_m1GO:003023myofibril a  | 7/2606  | 68/23843  | 0.624382 | 0.79337  | 0.754409 | Acta1/Cav3   |
| GO_BP_m1GO:004864regulation   | 7/2606  | 68/23843  | 0.624382 | 0.79337  | 0.754409 | Arntl/Ephb   |
| GO_BP_m1GO:006104negative re  | 7/2606  | 68/23843  | 0.624382 | 0.79337  | 0.754409 | Abat/Alox1   |
| GO_BP_m1GO:006034bone morp    | 10/2606 | 97/23843  | 0.626014 | 0.794223 | 0.75522  | Alpl/Csgalr  |
| GO_BP_m1GO:200123negative re  | 10/2606 | 97/23843  | 0.626014 | 0.794223 | 0.75522  | Dapk1/Gclh   |
| GO_BP_m1GO:000648protein der  | 3/2606  | 29/23843  | 0.628193 | 0.794223 | 0.75522  | Kdm2b/Kdm    |
| GO_BP_m1GO:000688intra-Golgi  | 3/2606  | 29/23843  | 0.628193 | 0.794223 | 0.75522  | Cog4/Copg    |
| GO_BP_m1GO:000821protein de   | 3/2606  | 29/23843  | 0.628193 | 0.794223 | 0.75522  | Kdm2b/Kdm    |
| GO_BP_m1GO:003094regulation   | 3/2606  | 29/23843  | 0.628193 | 0.794223 | 0.75522  | Myof/Pdcd    |
| GO_BP_m1GO:003278positive re  | 3/2606  | 29/23843  | 0.628193 | 0.794223 | 0.75522  | Btbd18/Ell2  |
| GO_BP_m1GO:003295inositol ph  | 3/2606  | 29/23843  | 0.628193 | 0.794223 | 0.75522  | Adcyap1r1    |
| GO_BP_m1GO:003647neuron de    | 3/2606  | 29/23843  | 0.628193 | 0.794223 | 0.75522  | Il10/Park2/  |
| GO_BP_m1GO:004330positive re  | 3/2606  | 29/23843  | 0.628193 | 0.794223 | 0.75522  | Itgam/Ms4    |
| GO_BP_m1GO:006030regulation   | 3/2606  | 29/23843  | 0.628193 | 0.794223 | 0.75522  | Akap6/Cav    |
| GO_BP_m1GO:007030lens fiber c | 3/2606  | 29/23843  | 0.628193 | 0.794223 | 0.75522  | Cdkn1c/Ep    |
| GO_BP_m1GO:009002positive re  | 3/2606  | 29/23843  | 0.628193 | 0.794223 | 0.75522  | Mospd2/N     |
| GO_BP_m1GO:190018negative re  | 3/2606  | 29/23843  | 0.628193 | 0.794223 | 0.75522  | Cldn18/Ei2   |
| GO_BP_m1GO:190320regulation   | 3/2606  | 29/23843  | 0.628193 | 0.794223 | 0.75522  | Il10/Park2/  |
| GO_BP_m1GO:000633chromatin    | 15/2606 | 145/23843 | 0.629016 | 0.794223 | 0.75522  | Ash2l/Bahc   |
| GO_BP_m1GO:001092negative re  | 8/2606  | 78/23843  | 0.629457 | 0.794223 | 0.75522  | Csrnp3/Fkk   |
| GO_BP_m1GO:007122cellular res | 28/2606 | 268/23843 | 0.629483 | 0.794223 | 0.75522  | Abl2/Adnp    |
| GO_BP_m1GO:000271positive re  | 4/2606  | 39/23843  | 0.629618 | 0.794223 | 0.75522  | Fam49b/Il1   |
| GO_BP_m1GO:000317heart valve  | 4/2606  | 39/23843  | 0.629618 | 0.794223 | 0.75522  | Adamts9/Ji   |
| GO_BP_m1GO:000668glycosphin   | 4/2606  | 39/23843  | 0.629618 | 0.794223 | 0.75522  | B4galt3/Ma   |
| GO_BP_m1GO:000930phospholi    | 4/2606  | 39/23843  | 0.629618 | 0.794223 | 0.75522  | Angptl3/Er   |
| GO_BP_m1GO:003112developme    | 4/2606  | 39/23843  | 0.629618 | 0.794223 | 0.75522  | Fgf1/Gdnf/   |
| GO_BP_m1GO:003434response tr  | 4/2606  | 39/23843  | 0.629618 | 0.794223 | 0.75522  | Cactin/Ifitr |
| GO_BP_m1GO:003545cellular res | 4/2606  | 39/23843  | 0.629618 | 0.794223 | 0.75522  | Gm12185/l    |
| GO_BP_m1GO:004327apoptotic c  | 4/2606  | 39/23843  | 0.629618 | 0.794223 | 0.75522  | Cd36/Pdia    |
| GO_BP_m1GO:004585pH reducti   | 4/2606  | 39/23843  | 0.629618 | 0.794223 | 0.75522  | Atp6v0c/Av   |
| GO_BP_m1GO:005128positive re  | 4/2606  | 39/23843  | 0.629618 | 0.794223 | 0.75522  | Akap6/Cd1    |
| GO_BP_m1GO:190357negative re  | 4/2606  | 39/23843  | 0.629618 | 0.794223 | 0.75522  | Nck2/Park2   |
| GO_BP_m1GO:000150cartilage cc | 2/2606  | 19/23843  | 0.630659 | 0.794223 | 0.75522  | Ctgf/Wnt7a   |
| GO_BP_m1GO:000160gastric acic | 2/2606  | 19/23843  | 0.630659 | 0.794223 | 0.75522  | Oprl1/Slc21  |
| GO_BP_m1GO:000231mature B c   | 2/2606  | 19/23843  | 0.630659 | 0.794223 | 0.75522  | Dock10/Gp    |
| GO_BP_m1GO:000321cardiac rigl | 2/2606  | 19/23843  | 0.630659 | 0.794223 | 0.75522  | Jag1/Zfpm    |
| GO_BP_m1GO:001018regulation   | 2/2606  | 19/23843  | 0.630659 | 0.794223 | 0.75522  | Drd3/Pm2C    |
| GO_BP_m1GO:001078positive re  | 2/2606  | 19/23843  | 0.630659 | 0.794223 | 0.75522  | Acta2/Pak1   |
| GO_BP_m1GO:001501heparan su   | 2/2606  | 19/23843  | 0.630659 | 0.794223 | 0.75522  | Extl3/Hs6st  |
| GO_BP_m1GO:001581L-glutamat   | 2/2606  | 19/23843  | 0.630659 | 0.794223 | 0.75522  | Arl6ip5/Slc  |
| GO_BP_m1GO:002153cell migrati | 2/2606  | 19/23843  | 0.630659 | 0.794223 | 0.75522  | Cend1/Plxr   |
| GO_BP_m1GO:003088regulation   | 2/2606  | 19/23843  | 0.630659 | 0.794223 | 0.75522  | Cul4a/Trib   |
| GO_BP_m1GO:003360positive re  | 2/2606  | 19/23843  | 0.630659 | 0.794223 | 0.75522  | Cartpt/Htrf  |
| GO_BP_m1GO:003396cytoplasmic  | 2/2606  | 19/23843  | 0.630659 | 0.794223 | 0.75522  | Noct/Cnotl   |
| GO_BP_m1GO:003535peroxisom    | 2/2606  | 19/23843  | 0.630659 | 0.794223 | 0.75522  | Asxl1/Plin5  |
| GO_BP_m1GO:003574CD4-positi   | 2/2606  | 19/23843  | 0.630659 | 0.794223 | 0.75522  | Arg1/Il12b   |
| GO_BP_m1GO:004278mRNA tran    | 2/2606  | 19/23843  | 0.630659 | 0.794223 | 0.75522  | Lmo2/Sox1    |
| GO_BP_m1GO:004395negative re  | 2/2606  | 19/23843  | 0.630659 | 0.794223 | 0.75522  | Atp2b4/Oq    |

|                   |              |         |           |          |          |          |             |
|-------------------|--------------|---------|-----------|----------|----------|----------|-------------|
| GO_BP_m1GO:004682 | positive re  | 2/2606  | 19/23843  | 0.630659 | 0.794223 | 0.75522  | Tpr/Wipf1   |
| GO_BP_m1GO:004831 | mitochond    | 2/2606  | 19/23843  | 0.630659 | 0.794223 | 0.75522  | Kat2a/Ogt   |
| GO_BP_m1GO:005077 | negative re  | 2/2606  | 19/23843  | 0.630659 | 0.794223 | 0.75522  | Dnm3/Nlgn   |
| GO_BP_m1GO:005101 | barbed-en    | 2/2606  | 19/23843  | 0.630659 | 0.794223 | 0.75522  | Cfl1/Gsn    |
| GO_BP_m1GO:00519C | establishm   | 2/2606  | 19/23843  | 0.630659 | 0.794223 | 0.75522  | Bloc1s5/Ra  |
| GO_BP_m1GO:00550C | cardiac my   | 2/2606  | 19/23843  | 0.630659 | 0.794223 | 0.75522  | Mylk2/Pdg   |
| GO_BP_m1GO:006012 | regulation   | 2/2606  | 19/23843  | 0.630659 | 0.794223 | 0.75522  | Arhgef7/Se  |
| GO_BP_m1GO:006074 | parental be  | 2/2606  | 19/23843  | 0.630659 | 0.794223 | 0.75522  | Avpr1a/Zfx  |
| GO_BP_m1GO:007252 | seminifero   | 2/2606  | 19/23843  | 0.630659 | 0.794223 | 0.75522  | Rnase10/W   |
| GO_BP_m1GO:009067 | RNA localiz  | 2/2606  | 19/23843  | 0.630659 | 0.794223 | 0.75522  | Cct3/Nop1   |
| GO_BP_m1GO:009067 | telomerase   | 2/2606  | 19/23843  | 0.630659 | 0.794223 | 0.75522  | Cct3/Nop1   |
| GO_BP_m1GO:009067 | telomerase   | 2/2606  | 19/23843  | 0.630659 | 0.794223 | 0.75522  | Cct3/Nop1   |
| GO_BP_m1GO:009068 | RNA localiz  | 2/2606  | 19/23843  | 0.630659 | 0.794223 | 0.75522  | Cct3/Nop1   |
| GO_BP_m1GO:19004C | positive re  | 2/2606  | 19/23843  | 0.630659 | 0.794223 | 0.75522  | Endog/Ralt  |
| GO_BP_m1GO:20001C | positive re  | 2/2606  | 19/23843  | 0.630659 | 0.794223 | 0.75522  | P2ry2/Tnfs  |
| GO_BP_m1GO:20002E | positive re  | 2/2606  | 19/23843  | 0.630659 | 0.794223 | 0.75522  | Bcas3/Csf3  |
| GO_BP_m1GO:200122 | positive re  | 2/2606  | 19/23843  | 0.630659 | 0.794223 | 0.75522  | Fbxo31/Sh   |
| GO_BP_m1GO:000641 | translation  | 11/2606 | 107/23843 | 0.631131 | 0.79493  | 0.755892 | Eif1b/Eif2a |
| GO_BP_m1GO:00323E | response tr  | 5/2606  | 49/23843  | 0.632539 | 0.79602  | 0.756929 | Crhbp/Fosl  |
| GO_BP_m1GO:00329E | collagen bi  | 5/2606  | 49/23843  | 0.632539 | 0.79602  | 0.756929 | Arg1/Col5a  |
| GO_BP_m1GO:00430E | tRNA amin    | 5/2606  | 49/23843  | 0.632539 | 0.79602  | 0.756929 | Kars/Lrrc47 |
| GO_BP_m1GO:19052E | negative re  | 5/2606  | 49/23843  | 0.632539 | 0.79602  | 0.756929 | Apobec1/H   |
| GO_BP_m1GO:00604E | regulation   | 18/2606 | 174/23843 | 0.634015 | 0.797652 | 0.758481 | Atp8b1/Bc   |
| GO_BP_m1GO:00072E | Rho protei   | 20/2606 | 193/23843 | 0.634264 | 0.797652 | 0.758481 | Abl2/Abra   |
| GO_BP_m1GO:000004 | transition   | n9/2606 | 88/23843  | 0.63438  | 0.797652 | 0.758481 | Atp7b/Gif   |
| GO_BP_m1GO:00435C | regulation   | 9/2606  | 88/23843  | 0.63438  | 0.797652 | 0.758481 | Gab1/Il1rn  |
| GO_BP_m1GO:00455E | positive re  | 9/2606  | 88/23843  | 0.63438  | 0.797652 | 0.758481 | Adam8/Ifn   |
| GO_BP_m1GO:190122 | regulation   | 9/2606  | 88/23843  | 0.63438  | 0.797652 | 0.758481 | C1qtnf3/Ca  |
| GO_BP_m1GO:00022E | CD4-positi   | 6/2606  | 59/23843  | 0.636118 | 0.798026 | 0.758836 | Gpr183/Ifn  |
| GO_BP_m1GO:003267 | regulation   | 6/2606  | 59/23843  | 0.636118 | 0.798026 | 0.758836 | Cactin/Hya  |
| GO_BP_m1GO:00456E | negative re  | 6/2606  | 59/23843  | 0.636118 | 0.798026 | 0.758836 | Noct/Gdf1   |
| GO_BP_m1GO:00460E | cGMP met     | 6/2606  | 59/23843  | 0.636118 | 0.798026 | 0.758836 | Adcy4/Guc   |
| GO_BP_m1GO:00510E | negative re  | 6/2606  | 59/23843  | 0.636118 | 0.798026 | 0.758836 | Abl2/Arhg   |
| GO_BP_m1GO:001624 | regulation   | 10/2606 | 98/23843  | 0.639149 | 0.798026 | 0.758836 | Bnip3/Dcn   |
| GO_BP_m1GO:00320E | negative re  | 10/2606 | 98/23843  | 0.639149 | 0.798026 | 0.758836 | Cav1/Csnk   |
| GO_BP_m1GO:00511E | positive re  | 7/2606  | 69/23843  | 0.639995 | 0.798026 | 0.758836 | Akap6/Cav   |
| GO_BP_m1GO:001574 | monosaccl    | 13/2606 | 127/23843 | 0.641236 | 0.798026 | 0.758836 | Adipor2/Ac  |
| GO_BP_m1GO:00434E | response tr  | 31/2606 | 298/23843 | 0.642965 | 0.798026 | 0.758836 | Appl1/Bcar  |
| GO_BP_m1GO:007134 | cellular res | 11/2606 | 108/23843 | 0.643767 | 0.798026 | 0.758836 | Arg1/Ccl2C  |
| GO_BP_m1GO:006144 | connective   | 26/2606 | 251/23843 | 0.644665 | 0.798026 | 0.758836 | Ap1s2/Bbs   |
| GO_BP_m1GO:000171 | endoderm     | 1/2606  | 9/23843   | 0.647215 | 0.798026 | 0.758836 | Sox2        |
| GO_BP_m1GO:000184 | neural fold  | 1/2606  | 9/23843   | 0.647215 | 0.798026 | 0.758836 | Cfl1        |
| GO_BP_m1GO:000231 | myeloid pr   | 1/2606  | 9/23843   | 0.647215 | 0.798026 | 0.758836 | Tet2        |
| GO_BP_m1GO:000274 | positive re  | 1/2606  | 9/23843   | 0.647215 | 0.798026 | 0.758836 | Kars        |
| GO_BP_m1GO:00028E | positive re  | 1/2606  | 9/23843   | 0.647215 | 0.798026 | 0.758836 | Il12b       |
| GO_BP_m1GO:00028E | positive re  | 1/2606  | 9/23843   | 0.647215 | 0.798026 | 0.758836 | Il12b       |
| GO_BP_m1GO:00028E | negative re  | 1/2606  | 9/23843   | 0.647215 | 0.798026 | 0.758836 | Bcr         |
| GO_BP_m1GO:000322 | ventricular  | 1/2606  | 9/23843   | 0.647215 | 0.798026 | 0.758836 | Nog         |

|                                      |         |          |          |          |          |
|--------------------------------------|---------|----------|----------|----------|----------|
| GO_BP_m1GO:000334pericardiur1/2606   | 9/23843 | 0.647215 | 0.798026 | 0.758836 | Dll4     |
| GO_BP_m1GO:000622UTP biosyn1/2606    | 9/23843 | 0.647215 | 0.798026 | 0.758836 | Nme6     |
| GO_BP_m1GO:000734penetrator1/2606    | 9/23843 | 0.647215 | 0.798026 | 0.758836 | Hyal3    |
| GO_BP_m1GO:000756parturition 1/2606  | 9/23843 | 0.647215 | 0.798026 | 0.758836 | Arntl    |
| GO_BP_m1GO:00083Cisoprenoid 1/2606   | 9/23843 | 0.647215 | 0.798026 | 0.758836 | Crabp1   |
| GO_BP_m1GO:000834adult feedin1/2606  | 9/23843 | 0.647215 | 0.798026 | 0.758836 | Cartpt   |
| GO_BP_m1GO:000912purine nucle1/2606  | 9/23843 | 0.647215 | 0.798026 | 0.758836 | Nt5c1a   |
| GO_BP_m1GO:000912pyrimidine 1/2606   | 9/23843 | 0.647215 | 0.798026 | 0.758836 | Shmt1    |
| GO_BP_m1GO:000922pyrimidine 1/2606   | 9/23843 | 0.647215 | 0.798026 | 0.758836 | Shmt1    |
| GO_BP_m1GO:001069regulation 1/2606   | 9/23843 | 0.647215 | 0.798026 | 0.758836 | Npnt     |
| GO_BP_m1GO:00108Cregulation 1/2606   | 9/23843 | 0.647215 | 0.798026 | 0.758836 | Stx1b    |
| GO_BP_m1GO:001402neural crest1/2606  | 9/23843 | 0.647215 | 0.798026 | 0.758836 | Pdcd6    |
| GO_BP_m1GO:001482intestine sr1/2606  | 9/23843 | 0.647215 | 0.798026 | 0.758836 | Tacr2    |
| GO_BP_m1GO:001486skeletal my1/2606   | 9/23843 | 0.647215 | 0.798026 | 0.758836 | Acta1    |
| GO_BP_m1GO:001582proline trans1/2606 | 9/23843 | 0.647215 | 0.798026 | 0.758836 | Slc6a20a |
| GO_BP_m1GO:00165Eperoxisome1/2606    | 9/23843 | 0.647215 | 0.798026 | 0.758836 | Sec16b   |
| GO_BP_m1GO:001706respiratory 1/2606  | 9/23843 | 0.647215 | 0.798026 | 0.758836 | Slc25a33 |
| GO_BP_m1GO:001802peptidyl-ly1/2606   | 9/23843 | 0.647215 | 0.798026 | 0.758836 | Kmt5a    |
| GO_BP_m1GO:001933phenol-co1/2606     | 9/23843 | 0.647215 | 0.798026 | 0.758836 | Dio2     |
| GO_BP_m1GO:002154rhombome1/2606      | 9/23843 | 0.647215 | 0.798026 | 0.758836 | Hoxb1    |
| GO_BP_m1GO:002156vestibuloc1/2606    | 9/23843 | 0.647215 | 0.798026 | 0.758836 | Atp8b1   |
| GO_BP_m1GO:002179cerebral co1/2606   | 9/23843 | 0.647215 | 0.798026 | 0.758836 | Dmrta2   |
| GO_BP_m1GO:002189olfactory b1/2606   | 9/23843 | 0.647215 | 0.798026 | 0.758836 | Arx      |
| GO_BP_m1GO:002202tangential 1/2606   | 9/23843 | 0.647215 | 0.798026 | 0.758836 | Arx      |
| GO_BP_m1GO:003091midbrain-1/2606     | 9/23843 | 0.647215 | 0.798026 | 0.758836 | Kdm2b    |
| GO_BP_m1GO:003144positive reg1/2606  | 9/23843 | 0.647215 | 0.798026 | 0.758836 | Cpeb3    |
| GO_BP_m1GO:00320Cpositive reg1/2606  | 9/23843 | 0.647215 | 0.798026 | 0.758836 | Plin5    |
| GO_BP_m1GO:00322Eperipheral 1/2606   | 9/23843 | 0.647215 | 0.798026 | 0.758836 | Ahnak2   |
| GO_BP_m1GO:003249response tr1/2606   | 9/23843 | 0.647215 | 0.798026 | 0.758836 | Cd36     |
| GO_BP_m1GO:003302regulation 1/2606   | 9/23843 | 0.647215 | 0.798026 | 0.758836 | Hcar2    |
| GO_BP_m1GO:003303positive reg1/2606  | 9/23843 | 0.647215 | 0.798026 | 0.758836 | Hcar2    |
| GO_BP_m1GO:003312positive reg1/2606  | 9/23843 | 0.647215 | 0.798026 | 0.758836 | Fmr1     |
| GO_BP_m1GO:003329secretion o1/2606   | 9/23843 | 0.647215 | 0.798026 | 0.758836 | Nr1h2    |
| GO_BP_m1GO:003331mitotic DN1/2606    | 9/23843 | 0.647215 | 0.798026 | 0.758836 | Topbp1   |
| GO_BP_m1GO:00336E nucleotide 1/2606  | 9/23843 | 0.647215 | 0.798026 | 0.758836 | Ercc5    |
| GO_BP_m1GO:00336Enegative re1/2606   | 9/23843 | 0.647215 | 0.798026 | 0.758836 | Eif2ak2  |
| GO_BP_m1GO:00343Enegative re1/2606   | 9/23843 | 0.647215 | 0.798026 | 0.758836 | Prkca    |
| GO_BP_m1GO:00344Emicrotubul1/2606    | 9/23843 | 0.647215 | 0.798026 | 0.758836 | Ccdc68   |
| GO_BP_m1GO:00345Emitochond1/2606     | 9/23843 | 0.647215 | 0.798026 | 0.758836 | Slc25a33 |
| GO_BP_m1GO:003477histone H4 1/2606   | 9/23843 | 0.647215 | 0.798026 | 0.758836 | Nsd2     |
| GO_BP_m1GO:003587nail develo1/2606   | 9/23843 | 0.647215 | 0.798026 | 0.758836 | Itga6    |
| GO_BP_m1GO:004202DNA endoi1/2606     | 9/23843 | 0.647215 | 0.798026 | 0.758836 | E2f7     |
| GO_BP_m1GO:004211endothelial1/2606   | 9/23843 | 0.647215 | 0.798026 | 0.758836 | Cxcl10   |
| GO_BP_m1GO:00421Eketone cat1/2606    | 9/23843 | 0.647215 | 0.798026 | 0.758836 | Haghl    |
| GO_BP_m1GO:004247outer ear n1/2606   | 9/23843 | 0.647215 | 0.798026 | 0.758836 | Tbx1     |
| GO_BP_m1GO:00450Epositive reg1/2606  | 9/23843 | 0.647215 | 0.798026 | 0.758836 | lfng     |
| GO_BP_m1GO:004541positive reg1/2606  | 9/23843 | 0.647215 | 0.798026 | 0.758836 | lfng     |
| GO_BP_m1GO:004547response tr1/2606   | 9/23843 | 0.647215 | 0.798026 | 0.758836 | Zc3h12a  |

|                                      |         |          |          |          |          |
|--------------------------------------|---------|----------|----------|----------|----------|
| GO_BP_m1GO:004575negative re1/2606   | 9/23843 | 0.647215 | 0.798026 | 0.758836 | Cav3     |
| GO_BP_m1GO:004614tetrahydro1/2606    | 9/23843 | 0.647215 | 0.798026 | 0.758836 | Gch1     |
| GO_BP_m1GO:004660regulation 1/2606   | 9/23843 | 0.647215 | 0.798026 | 0.758836 | Ranbp1   |
| GO_BP_m1GO:004666retinal cell 1/2606 | 9/23843 | 0.647215 | 0.798026 | 0.758836 | Casp6    |
| GO_BP_m1GO:004687regulation 1/2606   | 9/23843 | 0.647215 | 0.798026 | 0.758836 | Tac1     |
| GO_BP_m1GO:004825elastic fiber1/2606 | 9/23843 | 0.647215 | 0.798026 | 0.758836 | Fbln5    |
| GO_BP_m1GO:005071negative re1/2606   | 9/23843 | 0.647215 | 0.798026 | 0.758836 | Zc3h12a  |
| GO_BP_m1GO:005150adenine nu1/2606    | 9/23843 | 0.647215 | 0.798026 | 0.758836 | Slc25a23 |
| GO_BP_m1GO:005157positive re1/2606   | 9/23843 | 0.647215 | 0.798026 | 0.758836 | Dmrtc2   |
| GO_BP_m1GO:005166membrane 1/2606     | 9/23843 | 0.647215 | 0.798026 | 0.758836 | Gsn      |
| GO_BP_m1GO:005266flavonoid c1/2606   | 9/23843 | 0.647215 | 0.798026 | 0.758836 | Ugt1a9   |
| GO_BP_m1GO:005269xenobiotic 1/2606   | 9/23843 | 0.647215 | 0.798026 | 0.758836 | Ugt1a9   |
| GO_BP_m1GO:006002convergent1/2606    | 9/23843 | 0.647215 | 0.798026 | 0.758836 | Zfp568   |
| GO_BP_m1GO:006013embryonic 1/2606    | 9/23843 | 0.647215 | 0.798026 | 0.758836 | Tle6     |
| GO_BP_m1GO:006031regulation 1/2606   | 9/23843 | 0.647215 | 0.798026 | 0.758836 | Bcr      |
| GO_BP_m1GO:006042lung vascul1/2606   | 9/23843 | 0.647215 | 0.798026 | 0.758836 | lft88    |
| GO_BP_m1GO:006053diaphragm 1/2606    | 9/23843 | 0.647215 | 0.798026 | 0.758836 | Wt1      |
| GO_BP_m1GO:006059mammary 1/2606      | 9/23843 | 0.647215 | 0.798026 | 0.758836 | Pax3     |
| GO_BP_m1GO:006063mesenchyr1/2606     | 9/23843 | 0.647215 | 0.798026 | 0.758836 | Fgf7     |
| GO_BP_m1GO:006071chorion de1/2606    | 9/23843 | 0.647215 | 0.798026 | 0.758836 | E2f7     |
| GO_BP_m1GO:006103visceral ser1/2606  | 9/23843 | 0.647215 | 0.798026 | 0.758836 | Wt1      |
| GO_BP_m1GO:006130cornea dev1/2606    | 9/23843 | 0.647215 | 0.798026 | 0.758836 | Limk2    |
| GO_BP_m1GO:006137testosteror1/2606   | 9/23843 | 0.647215 | 0.798026 | 0.758836 | Hsd17b3  |
| GO_BP_m1GO:006152hindgut de1/2606    | 9/23843 | 0.647215 | 0.798026 | 0.758836 | lft172   |
| GO_BP_m1GO:006154sympatheti1/2606    | 9/23843 | 0.647215 | 0.798026 | 0.758836 | Sema3f   |
| GO_BP_m1GO:006157calcium ior1/2606   | 9/23843 | 0.647215 | 0.798026 | 0.758836 | Cacnb2   |
| GO_BP_m1GO:007054histone H3 1/2606   | 9/23843 | 0.647215 | 0.798026 | 0.758836 | Kdm2b    |
| GO_BP_m1GO:007130cellular res1/2606  | 9/23843 | 0.647215 | 0.798026 | 0.758836 | Kank2    |
| GO_BP_m1GO:007139cellular res1/2606  | 9/23843 | 0.647215 | 0.798026 | 0.758836 | Spp1     |
| GO_BP_m1GO:007139cellular res1/2606  | 9/23843 | 0.647215 | 0.798026 | 0.758836 | Smo      |
| GO_BP_m1GO:007148cellular res1/2606  | 9/23843 | 0.647215 | 0.798026 | 0.758836 | Nucks1   |
| GO_BP_m1GO:007221negative re1/2606   | 9/23843 | 0.647215 | 0.798026 | 0.758836 | Wt1      |
| GO_BP_m1GO:007249mesenchyr1/2606     | 9/23843 | 0.647215 | 0.798026 | 0.758836 | Pdgfra   |
| GO_BP_m1GO:007268T cell extra1/2606  | 9/23843 | 0.647215 | 0.798026 | 0.758836 | Ripk3    |
| GO_BP_m1GO:008603regulation 1/2606   | 9/23843 | 0.647215 | 0.798026 | 0.758836 | Fxyd1    |
| GO_BP_m1GO:009003positive re1/2606   | 9/23843 | 0.647215 | 0.798026 | 0.758836 | Por      |
| GO_BP_m1GO:009009positive re1/2606   | 9/23843 | 0.647215 | 0.798026 | 0.758836 | Fscn1    |
| GO_BP_m1GO:009015regulation 1/2606   | 9/23843 | 0.647215 | 0.798026 | 0.758836 | Smpd3    |
| GO_BP_m1GO:009030regulation 1/2606   | 9/23843 | 0.647215 | 0.798026 | 0.758836 | Apobec1  |
| GO_BP_m1GO:009039replicative 1/2606  | 9/23843 | 0.647215 | 0.798026 | 0.758836 | Atr      |
| GO_BP_m1GO:009711postsynapt1/2606    | 9/23843 | 0.647215 | 0.798026 | 0.758836 | Cdh2     |
| GO_BP_m1GO:009877positive re1/2606   | 9/23843 | 0.647215 | 0.798026 | 0.758836 | Park2    |
| GO_BP_m1GO:009963endosome 1/2606     | 9/23843 | 0.647215 | 0.798026 | 0.758836 | Arhgap44 |
| GO_BP_m1GO:190103positive re1/2606   | 9/23843 | 0.647215 | 0.798026 | 0.758836 | Endog    |
| GO_BP_m1GO:190140positive re1/2606   | 9/23843 | 0.647215 | 0.798026 | 0.758836 | Ccnl1    |
| GO_BP_m1GO:190152positive re1/2606   | 9/23843 | 0.647215 | 0.798026 | 0.758836 | Park2    |
| GO_BP_m1GO:190172positive re1/2606   | 9/23843 | 0.647215 | 0.798026 | 0.758836 | Myc      |
| GO_BP_m1GO:190222ketone boc1/2606    | 9/23843 | 0.647215 | 0.798026 | 0.758836 | Dgat1    |

|                   |              |         |           |          |          |          |             |
|-------------------|--------------|---------|-----------|----------|----------|----------|-------------|
| GO_BP_m1GO:190266 | positive reg | 1/2606  | 9/23843   | 0.647215 | 0.798026 | 0.758836 | Tubb2b      |
| GO_BP_m1GO:190294 | protein loc  | 1/2606  | 9/23843   | 0.647215 | 0.798026 | 0.758836 | Ezr         |
| GO_BP_m1GO:190324 | regulation   | 1/2606  | 9/23843   | 0.647215 | 0.798026 | 0.758836 | Atp2b4      |
| GO_BP_m1GO:190379 | negative re  | 1/2606  | 9/23843   | 0.647215 | 0.798026 | 0.758836 | Zc3h12a     |
| GO_BP_m1GO:190433 | regulation   | 1/2606  | 9/23843   | 0.647215 | 0.798026 | 0.758836 | Wnt3a       |
| GO_BP_m1GO:190435 | negative re  | 1/2606  | 9/23843   | 0.647215 | 0.798026 | 0.758836 | Xrcc1       |
| GO_BP_m1GO:190472 | regulation   | 1/2606  | 9/23843   | 0.647215 | 0.798026 | 0.758836 | Dgat1       |
| GO_BP_m1GO:190503 | regulation   | 1/2606  | 9/23843   | 0.647215 | 0.798026 | 0.758836 | Smpd3       |
| GO_BP_m1GO:190521 | positive reg | 1/2606  | 9/23843   | 0.647215 | 0.798026 | 0.758836 | Fmr1        |
| GO_BP_m1GO:190545 | regulation   | 1/2606  | 9/23843   | 0.647215 | 0.798026 | 0.758836 | Fln         |
| GO_BP_m1GO:200034 | positive reg | 1/2606  | 9/23843   | 0.647215 | 0.798026 | 0.758836 | Hdac1       |
| GO_BP_m1GO:200038 | negative re  | 1/2606  | 9/23843   | 0.647215 | 0.798026 | 0.758836 | Dand5       |
| GO_BP_m1GO:200038 | regulation   | 1/2606  | 9/23843   | 0.647215 | 0.798026 | 0.758836 | Adam8       |
| GO_BP_m1GO:200039 | positive reg | 1/2606  | 9/23843   | 0.647215 | 0.798026 | 0.758836 | Adam8       |
| GO_BP_m1GO:200050 | regulation   | 1/2606  | 9/23843   | 0.647215 | 0.798026 | 0.758836 | Calr        |
| GO_BP_m1GO:200055 | regulation   | 1/2606  | 9/23843   | 0.647215 | 0.798026 | 0.758836 | Arg1        |
| GO_BP_m1GO:200079 | regulation   | 1/2606  | 9/23843   | 0.647215 | 0.798026 | 0.758836 | Fgf7        |
| GO_BP_m1GO:200104 | positive reg | 1/2606  | 9/23843   | 0.647215 | 0.798026 | 0.758836 | Cd63        |
| GO_BP_m1GO:200113 | regulation   | 1/2606  | 9/23843   | 0.647215 | 0.798026 | 0.758836 | Ndr4        |
| GO_BP_m1GO:200117 | regulation   | 1/2606  | 9/23843   | 0.647215 | 0.798026 | 0.758836 | Pycard      |
| GO_BP_m1GO:200121 | positive reg | 1/2606  | 9/23843   | 0.647215 | 0.798026 | 0.758836 | Adm         |
| GO_BP_m1GO:200122 | regulation   | 1/2606  | 9/23843   | 0.647215 | 0.798026 | 0.758836 | Abcb1a      |
| GO_BP_m1GO:000170 | cell fate sp | 9/2606  | 89/23843  | 0.648022 | 0.798909 | 0.759676 | Dbx1/Dmrt   |
| GO_BP_m1GO:000858 | male gonar   | 12/2606 | 118/23843 | 0.648241 | 0.799066 | 0.759825 | Dmrt1/Hsd   |
| GO_BP_m1GO:000178 | B cell apop  | 4/2606  | 40/23843  | 0.64985  | 0.799376 | 0.76012  | Il10/Mir18k |
| GO_BP_m1GO:000618 | cGMP bios    | 4/2606  | 40/23843  | 0.64985  | 0.799376 | 0.76012  | Adcy4/Guc   |
| GO_BP_m1GO:003051 | negative re  | 4/2606  | 40/23843  | 0.64985  | 0.799376 | 0.76012  | Aatk/Cdk5/  |
| GO_BP_m1GO:003083 | negative re  | 4/2606  | 40/23843  | 0.64985  | 0.799376 | 0.76012  | Cfl1/Gsn/P  |
| GO_BP_m1GO:003201 | ARF protei   | 4/2606  | 40/23843  | 0.64985  | 0.799376 | 0.76012  | Appl1/Asa   |
| GO_BP_m1GO:003201 | regulation   | 4/2606  | 40/23843  | 0.64985  | 0.799376 | 0.76012  | Appl1/Asa   |
| GO_BP_m1GO:009027 | regulation   | 4/2606  | 40/23843  | 0.64985  | 0.799376 | 0.76012  | Calcr/Cav3  |
| GO_BP_m1GO:190403 | positive reg | 4/2606  | 40/23843  | 0.64985  | 0.799376 | 0.76012  | Ccnl1/Stil  |
| GO_BP_m1GO:000166 | behavioral   | 5/2606  | 50/23843  | 0.650632 | 0.799376 | 0.76012  | Eif4e/Grin2 |
| GO_BP_m1GO:000714 | male meiot   | 5/2606  | 50/23843  | 0.650632 | 0.799376 | 0.76012  | Btbd18/Dd   |
| GO_BP_m1GO:001401 | negative re  | 5/2606  | 50/23843  | 0.650632 | 0.799376 | 0.76012  | Drd3/ldh2/  |
| GO_BP_m1GO:003010 | water hom    | 5/2606  | 50/23843  | 0.650632 | 0.799376 | 0.76012  | Abca12/Alc  |
| GO_BP_m1GO:003221 | regulation   | 5/2606  | 50/23843  | 0.650632 | 0.799376 | 0.76012  | Atr/Cct3/H  |
| GO_BP_m1GO:004298 | amyloid pr   | 5/2606  | 50/23843  | 0.650632 | 0.799376 | 0.76012  | Aph1a/C3    |
| GO_BP_m1GO:004303 | amino acid   | 5/2606  | 50/23843  | 0.650632 | 0.799376 | 0.76012  | Kars/Lrrc47 |
| GO_BP_m1GO:004361 | regulation   | 5/2606  | 50/23843  | 0.650632 | 0.799376 | 0.76012  | Atf3/Cd36/  |
| GO_BP_m1GO:004394 | regulation   | 5/2606  | 50/23843  | 0.650632 | 0.799376 | 0.76012  | Adcyap1r1.  |
| GO_BP_m1GO:000153 | cilium or fl | 3/2606  | 30/23843  | 0.651495 | 0.799376 | 0.76012  | Bbs2/Dnah   |
| GO_BP_m1GO:000282 | regulation   | 3/2606  | 30/23843  | 0.651495 | 0.799376 | 0.76012  | Arg1/Il27ra |
| GO_BP_m1GO:000290 | regulation   | 3/2606  | 30/23843  | 0.651495 | 0.799376 | 0.76012  | Il10/Mir18k |
| GO_BP_m1GO:000958 | detection c  | 3/2606  | 30/23843  | 0.651495 | 0.799376 | 0.76012  | Prcd/Opn4   |
| GO_BP_m1GO:003223 | negative re  | 3/2606  | 30/23843  | 0.651495 | 0.799376 | 0.76012  | Cfl1/Kank2  |
| GO_BP_m1GO:004353 | negative re  | 3/2606  | 30/23843  | 0.651495 | 0.799376 | 0.76012  | Dil4/Itgb1k |
| GO_BP_m1GO:004566 | negative re  | 3/2606  | 30/23843  | 0.651495 | 0.799376 | 0.76012  | Cxcl10/Mk   |

|                                      |           |          |          |          |              |
|--------------------------------------|-----------|----------|----------|----------|--------------|
| GO_BP_m1GO:004603GTP metab3/2606     | 30/23843  | 0.651495 | 0.799376 | 0.76012  | Gphn/Moc     |
| GO_BP_m1GO:004867regulation 3/2606   | 30/23843  | 0.651495 | 0.799376 | 0.76012  | Fkbp1b/Klk   |
| GO_BP_m1GO:004884regulation 3/2606   | 30/23843  | 0.651495 | 0.799376 | 0.76012  | Plxna2/Sen   |
| GO_BP_m1GO:005048arachidonir3/2606   | 30/23843  | 0.651495 | 0.799376 | 0.76012  | Drd3/Pla2c   |
| GO_BP_m1GO:005156regulation 3/2606   | 30/23843  | 0.651495 | 0.799376 | 0.76012  | H2afy/Prm    |
| GO_BP_m1GO:006028cilium-dep3/2606    | 30/23843  | 0.651495 | 0.799376 | 0.76012  | Bbs2/Dnah    |
| GO_BP_m1GO:007234sulfur comi3/2606   | 30/23843  | 0.651495 | 0.799376 | 0.76012  | Racgap1/S    |
| GO_BP_m1GO:190007positive reç3/2606  | 30/23843  | 0.651495 | 0.799376 | 0.76012  | Nucks1/Os    |
| GO_BP_m1GO:190396arachidona3/2606    | 30/23843  | 0.651495 | 0.799376 | 0.76012  | Drd3/Pla2c   |
| GO_BP_m1GO:005087regulation 35/2606  | 337/23843 | 0.65229  | 0.800072 | 0.760781 | Abat/Abca    |
| GO_BP_m1GO:000229alpha-beta6/2606    | 60/23843  | 0.652608 | 0.800072 | 0.760781 | Gpr183/Ifn   |
| GO_BP_m1GO:000627RNA-depe 6/2606     | 60/23843  | 0.652608 | 0.800072 | 0.760781 | Atr/Cct3/H   |
| GO_BP_m1GO:00070Ctelomere r6/2606    | 60/23843  | 0.652608 | 0.800072 | 0.760781 | Atr/Cct3/H   |
| GO_BP_m1GO:000808axo-dendri6/2606    | 60/23843  | 0.652608 | 0.800072 | 0.760781 | Bloc1s5/Frn  |
| GO_BP_m1GO:003033DNA dama6/2606      | 60/23843  | 0.652608 | 0.800072 | 0.760781 | Ankrd1/Atr   |
| GO_BP_m1GO:000173morphoge17/2606     | 70/23843  | 0.655225 | 0.803055 | 0.763619 | Abl2/Cthrc   |
| GO_BP_m1GO:000749endoderm 7/2606     | 70/23843  | 0.655225 | 0.803055 | 0.763619 | Cfc1/Col5a   |
| GO_BP_m1GO:000244production31/2606   | 300/23843 | 0.657869 | 0.804626 | 0.765112 | 5730559C1    |
| GO_BP_m1GO:000237cytokine se2/2606   | 20/23843  | 0.658929 | 0.804626 | 0.765112 | Il10/Kars    |
| GO_BP_m1GO:000275MyD88-de 2/2606     | 20/23843  | 0.658929 | 0.804626 | 0.765112 | Irak2/Tlr5   |
| GO_BP_m1GO:000308positive reç2/2606  | 20/23843  | 0.658929 | 0.804626 | 0.765112 | Avpr1a/Ma    |
| GO_BP_m1GO:000678heme biosy2/2606    | 20/23843  | 0.658929 | 0.804626 | 0.765112 | Cox15/Iba5   |
| GO_BP_m1GO:000681phosphate 2/2606    | 20/23843  | 0.658929 | 0.804626 | 0.765112 | Ank/Slc20a   |
| GO_BP_m1GO:00092Cdeoxyribor 2/2606   | 20/23843  | 0.658929 | 0.804626 | 0.765112 | Adk/Nudt1    |
| GO_BP_m1GO:001573prostaglani2/2606   | 20/23843  | 0.658929 | 0.804626 | 0.765112 | P2ry2/Tnfs   |
| GO_BP_m1GO:001648peptide ho 2/2606   | 20/23843  | 0.658929 | 0.804626 | 0.765112 | Corin/Cpz    |
| GO_BP_m1GO:003144regulation 2/2606   | 20/23843  | 0.658929 | 0.804626 | 0.765112 | Cpeb3/Sup    |
| GO_BP_m1GO:00323Cregulation 2/2606   | 20/23843  | 0.658929 | 0.804626 | 0.765112 | P2ry2/Tnfs   |
| GO_BP_m1GO:003303negative re2/2606   | 20/23843  | 0.658929 | 0.804626 | 0.765112 | Kitl/St6gal1 |
| GO_BP_m1GO:003436protein-lip 2/2606  | 20/23843  | 0.658929 | 0.804626 | 0.765112 | Pltp/Scarb1  |
| GO_BP_m1GO:003436plasma lipc2/2606   | 20/23843  | 0.658929 | 0.804626 | 0.765112 | Pltp/Scarb1  |
| GO_BP_m1GO:004273fibrinolysis 2/2606 | 20/23843  | 0.658929 | 0.804626 | 0.765112 | Anxa2/F11    |
| GO_BP_m1GO:004594positive reç2/2606  | 20/23843  | 0.658929 | 0.804626 | 0.765112 | Rps6kb1/Y    |
| GO_BP_m1GO:00509C detection c2/2606  | 20/23843  | 0.658929 | 0.804626 | 0.765112 | Prcd/Tulp1   |
| GO_BP_m1GO:005096 detection c2/2606  | 20/23843  | 0.658929 | 0.804626 | 0.765112 | Prcd/Tulp1   |
| GO_BP_m1GO:007016negative re2/2606   | 20/23843  | 0.658929 | 0.804626 | 0.765112 | Ccr1/Rflna   |
| GO_BP_m1GO:007063transepithe2/2606   | 20/23843  | 0.658929 | 0.804626 | 0.765112 | Ednrb/Slc1   |
| GO_BP_m1GO:009005positive reç2/2606  | 20/23843  | 0.658929 | 0.804626 | 0.765112 | Cib1/Ptgs2   |
| GO_BP_m1GO:009874cell aggreg2/2606   | 20/23843  | 0.658929 | 0.804626 | 0.765112 | Ctgf/Wnt7a   |
| GO_BP_m1GO:190122negative re2/2606   | 20/23843  | 0.658929 | 0.804626 | 0.765112 | C1qtnf3/Zc   |
| GO_BP_m1GO:199012retrograde 2/2606   | 20/23843  | 0.658929 | 0.804626 | 0.765112 | Arhgap44/    |
| GO_BP_m1GO:199018exosomal s2/2606    | 20/23843  | 0.658929 | 0.804626 | 0.765112 | Park2/Smp    |
| GO_BP_m1GO:200102regulation 2/2606   | 20/23843  | 0.658929 | 0.804626 | 0.765112 | Fgf1/Fgf16   |
| GO_BP_m1GO:007123cellular res17/2606 | 167/23843 | 0.65898  | 0.804626 | 0.765112 | Cdh1/Cpek    |
| GO_BP_m1GO:004654developme12/2606    | 119/23843 | 0.659895 | 0.805631 | 0.766067 | Dmrt1/Hsd    |
| GO_BP_m1GO:000244myeloid let9/2606   | 90/23843  | 0.661372 | 0.807211 | 0.76757  | Anxa3/Arg    |
| GO_BP_m1GO:005079regulation 9/2606   | 90/23843  | 0.661372 | 0.807211 | 0.76757  | Adora1/Dg    |
| GO_BP_m1GO:000836regulation 20/2606  | 196/23843 | 0.661905 | 0.807748 | 0.768081 | Aatk/Cav3/   |

|                   |              |         |           |          |          |          |               |
|-------------------|--------------|---------|-----------|----------|----------|----------|---------------|
| GO_BP_m1GO:00307C | cytoskeleton | 16/2606 | 158/23843 | 0.664842 | 0.811219 | 0.771382 | Bloc1s5/Cc    |
| GO_BP_m1GO:00026C | positive re  | 21/2606 | 206/23843 | 0.665909 | 0.812408 | 0.772512 | Arg1/Cadn     |
| GO_BP_m1GO:200004 | regulation   | 11/2606 | 110/23843 | 0.667985 | 0.813758 | 0.773796 | Cdkn1a/Cu     |
| GO_BP_m1GO:00018C | retina hom   | 5/2606  | 51/23843  | 0.668148 | 0.813758 | 0.773796 | Bbs10/Bbs1    |
| GO_BP_m1GO:00022C | behavioral   | 5/2606  | 51/23843  | 0.668148 | 0.813758 | 0.773796 | Eif4e/Grin2   |
| GO_BP_m1GO:00322C | positive re  | 5/2606  | 51/23843  | 0.668148 | 0.813758 | 0.773796 | Atr/Cct3/H    |
| GO_BP_m1GO:003261 | interleukin  | 5/2606  | 51/23843  | 0.668148 | 0.813758 | 0.773796 | 5730559C1     |
| GO_BP_m1GO:004577 | positive re  | 5/2606  | 51/23843  | 0.668148 | 0.813758 | 0.773796 | Cdkl5/Nrg1    |
| GO_BP_m1GO:007171 | icosanoid t  | 5/2606  | 51/23843  | 0.668148 | 0.813758 | 0.773796 | Drd3/P2ry2    |
| GO_BP_m1GO:00860C | cardiac mu   | 5/2606  | 51/23843  | 0.668148 | 0.813758 | 0.773796 | Cacnb2/Ca     |
| GO_BP_m1GO:190157 | fatty acid d | 5/2606  | 51/23843  | 0.668148 | 0.813758 | 0.773796 | Drd3/P2ry2    |
| GO_BP_m1GO:000961 | response tr  | 48/2606 | 462/23843 | 0.668538 | 0.813758 | 0.773796 | 4833427F1     |
| GO_BP_m1GO:00022E | alpha-beta   | 6/2606  | 61/23843  | 0.668631 | 0.813758 | 0.773796 | Gpr183/Ifn    |
| GO_BP_m1GO:00108C | regulation   | 6/2606  | 61/23843  | 0.668631 | 0.813758 | 0.773796 | Cav3/Cxcl1    |
| GO_BP_m1GO:00162C | positive re  | 6/2606  | 61/23843  | 0.668631 | 0.813758 | 0.773796 | Bnip3/Dcnr    |
| GO_BP_m1GO:00308E | positive re  | 6/2606  | 61/23843  | 0.668631 | 0.813758 | 0.773796 | Alox12/Fox    |
| GO_BP_m1GO:00603C | regulation   | 6/2606  | 61/23843  | 0.668631 | 0.813758 | 0.773796 | Bmp3/Gdf1     |
| GO_BP_m1GO:199082 | response tr  | 32/2606 | 311/23843 | 0.668991 | 0.813758 | 0.773796 | Bcat2/Bclaf   |
| GO_BP_m1GO:19908C | cellular res | 32/2606 | 311/23843 | 0.668991 | 0.813758 | 0.773796 | Bcat2/Bclaf   |
| GO_BP_m1GO:00074C | salivary gla | 4/2606  | 41/23843  | 0.669331 | 0.813758 | 0.773796 | Cdh1/Fgf7,    |
| GO_BP_m1GO:00092C | response tr  | 4/2606  | 41/23843  | 0.669331 | 0.813758 | 0.773796 | Arsb/Gja3/    |
| GO_BP_m1GO:001051 | positive re  | 4/2606  | 41/23843  | 0.669331 | 0.813758 | 0.773796 | Abl2/Adcy4    |
| GO_BP_m1GO:00109C | positive re  | 4/2606  | 41/23843  | 0.669331 | 0.813758 | 0.773796 | Esrrb/Kat2a   |
| GO_BP_m1GO:002152 | spinal cord  | 4/2606  | 41/23843  | 0.669331 | 0.813758 | 0.773796 | Gigyf2/Hox    |
| GO_BP_m1GO:00216C | cerebellar   | 4/2606  | 41/23843  | 0.669331 | 0.813758 | 0.773796 | Cdk5/Cenc     |
| GO_BP_m1GO:006151 | protein loc  | 4/2606  | 41/23843  | 0.669331 | 0.813758 | 0.773796 | Bbs2/Cc2d     |
| GO_BP_m1GO:00970C | regulation   | 4/2606  | 41/23843  | 0.669331 | 0.813758 | 0.773796 | Abcb1a/At     |
| GO_BP_m1GO:00974E | neuron prc   | 22/2606 | 216/23843 | 0.669797 | 0.814212 | 0.774228 | Arx/Cdk5/C    |
| GO_BP_m1GO:003227 | negative re  | 7/2606  | 71/23843  | 0.670062 | 0.814422 | 0.774427 | Cfl1/Gsn/K    |
| GO_BP_m1GO:00701C | regulation   | 8/2606  | 81/23843  | 0.672065 | 0.815813 | 0.77575  | Ank/Bglap3    |
| GO_BP_m1GO:19019E | positive re  | 8/2606  | 81/23843  | 0.672065 | 0.815813 | 0.77575  | Cdc25a/Cd     |
| GO_BP_m1GO:00108C | regulation   | 3/2606  | 31/23843  | 0.673732 | 0.815813 | 0.77575  | Ctsl/Fgf7/H   |
| GO_BP_m1GO:00158C | neutral am   | 3/2606  | 31/23843  | 0.673732 | 0.815813 | 0.77575  | Slc43a2/Slc   |
| GO_BP_m1GO:00326E | negative re  | 3/2606  | 31/23843  | 0.673732 | 0.815813 | 0.77575  | Il10/Il1rl1/2 |
| GO_BP_m1GO:003412 | negative re  | 3/2606  | 31/23843  | 0.673732 | 0.815813 | 0.77575  | Cactin/Lgr4   |
| GO_BP_m1GO:00426C | regulation   | 3/2606  | 31/23843  | 0.673732 | 0.815813 | 0.77575  | Arntl/Clock   |
| GO_BP_m1GO:004327 | anoikis      | 3/2606  | 31/23843  | 0.673732 | 0.815813 | 0.77575  | Cav1/E2f1/    |
| GO_BP_m1GO:004351 | regulation   | 3/2606  | 31/23843  | 0.673732 | 0.815813 | 0.77575  | Ankrd1/Atr    |
| GO_BP_m1GO:00443C | cell-cell ad | 3/2606  | 31/23843  | 0.673732 | 0.815813 | 0.77575  | Cdh1/Cdh2     |
| GO_BP_m1GO:004561 | regulation   | 3/2606  | 31/23843  | 0.673732 | 0.815813 | 0.77575  | Foxc1/H2a     |
| GO_BP_m1GO:004824 | sperm cap    | 3/2606  | 31/23843  | 0.673732 | 0.815813 | 0.77575  | Acrbp/Bspl    |
| GO_BP_m1GO:007162 | positive re  | 3/2606  | 31/23843  | 0.673732 | 0.815813 | 0.77575  | Mospd2/N      |
| GO_BP_m1GO:00725E | clathrin-de  | 3/2606  | 31/23843  | 0.673732 | 0.815813 | 0.77575  | Canx/Dnajc    |
| GO_BP_m1GO:003421 | carbohydr    | 13/2606 | 130/23843 | 0.674669 | 0.815813 | 0.77575  | Adipor2/Ac    |
| GO_BP_m1GO:005101 | actin filam  | 16/2606 | 159/23843 | 0.674754 | 0.815813 | 0.77575  | Abl2/Cfl1/C   |
| GO_BP_m1GO:000227 | myeloid lei  | 19/2606 | 188/23843 | 0.676136 | 0.815813 | 0.77575  | Anxa3/Bcr/    |
| GO_BP_m1GO:00302E | bone mine    | 10/2606 | 101/23843 | 0.677006 | 0.815813 | 0.77575  | Ank/Bglap3    |
| GO_BP_m1GO:004562 | positive re  | 10/2606 | 101/23843 | 0.677006 | 0.815813 | 0.77575  | Adam8/Ifn     |

|                               |         |           |          |          |         |             |
|-------------------------------|---------|-----------|----------|----------|---------|-------------|
| GO_BP_m1GO:000206columnar/c   | 14/2606 | 140/23843 | 0.677983 | 0.815813 | 0.77575 | Abl2/Arntl/ |
| GO_BP_m1GO:004558regulation   | 14/2606 | 140/23843 | 0.677983 | 0.815813 | 0.77575 | Adam8/Ctl   |
| GO_BP_m1GO:000749mesoderm     | 11/2606 | 111/23843 | 0.679732 | 0.815813 | 0.77575 | Dand5/Eph   |
| GO_BP_m1GO:005116nuclear exp  | 15/2606 | 150/23843 | 0.681263 | 0.815813 | 0.77575 | Calr/Cdk5/  |
| GO_BP_m1GO:004320response tr  | 18/2606 | 179/23843 | 0.681731 | 0.815813 | 0.77575 | Cdh1/Cfl1/  |
| GO_BP_m1GO:000208lens develc  | 7/2606  | 72/23843  | 0.684497 | 0.815813 | 0.77575 | Bcar3/Cdkr  |
| GO_BP_m1GO:006056neuroepith   | 7/2606  | 72/23843  | 0.684497 | 0.815813 | 0.77575 | Abl2/B9d1,  |
| GO_BP_m1GO:003080positive re  | 5/2606  | 52/23843  | 0.685077 | 0.815813 | 0.77575 | Adm/Calcr,  |
| GO_BP_m1GO:004353positive re  | 5/2606  | 52/23843  | 0.685077 | 0.815813 | 0.77575 | Atp5a1/Cik  |
| GO_BP_m1GO:005073negative re  | 5/2606  | 52/23843  | 0.685077 | 0.815813 | 0.77575 | Cav1/Gprc1  |
| GO_BP_m1GO:007257endothelial  | 5/2606  | 52/23843  | 0.685077 | 0.815813 | 0.77575 | Abl2/Cd24/  |
| GO_BP_m1GO:000042mitophagy    | 2/2606  | 21/23843  | 0.685434 | 0.815813 | 0.77575 | Park2/Tiga  |
| GO_BP_m1GO:000197neurologic   | 2/2606  | 21/23843  | 0.685434 | 0.815813 | 0.77575 | Adra1d/Ma   |
| GO_BP_m1GO:000232lymphoid     | 2/2606  | 21/23843  | 0.685434 | 0.815813 | 0.77575 | Fln/Prkdc   |
| GO_BP_m1GO:000247antigen prc  | 2/2606  | 21/23843  | 0.685434 | 0.815813 | 0.77575 | H2-DMb2/    |
| GO_BP_m1GO:000635DNA-temp     | 2/2606  | 21/23843  | 0.685434 | 0.815813 | 0.77575 | Mterf2/Xrn  |
| GO_BP_m1GO:001059positive re  | 2/2606  | 21/23843  | 0.685434 | 0.815813 | 0.77575 | Cfl1/Fscn1  |
| GO_BP_m1GO:002151dorsal spin  | 2/2606  | 21/23843  | 0.685434 | 0.815813 | 0.77575 | Pax3/Wnt3   |
| GO_BP_m1GO:003240melanoson    | 2/2606  | 21/23843  | 0.685434 | 0.815813 | 0.77575 | Bloc1s5/Ra  |
| GO_BP_m1GO:003292regulation   | 2/2606  | 21/23843  | 0.685434 | 0.815813 | 0.77575 | Fpr2/Itgam  |
| GO_BP_m1GO:003296positive re  | 2/2606  | 21/23843  | 0.685434 | 0.815813 | 0.77575 | Btbd18/Ell2 |
| GO_BP_m1GO:003362integrin ac  | 2/2606  | 21/23843  | 0.685434 | 0.815813 | 0.77575 | Fermt2/Itgl |
| GO_BP_m1GO:003436protein-co   | 2/2606  | 21/23843  | 0.685434 | 0.815813 | 0.77575 | Pltp/Scarbl |
| GO_BP_m1GO:004427sulfur com   | 2/2606  | 21/23843  | 0.685434 | 0.815813 | 0.77575 | Blmh/Mtrr   |
| GO_BP_m1GO:004480autophagy    | 2/2606  | 21/23843  | 0.685434 | 0.815813 | 0.77575 | Atg2a/Wip   |
| GO_BP_m1GO:004632negative re  | 2/2606  | 21/23843  | 0.685434 | 0.815813 | 0.77575 | Myc/Prkca   |
| GO_BP_m1GO:004824eosinophil   | 2/2606  | 21/23843  | 0.685434 | 0.815813 | 0.77575 | Ccl4/Scg2   |
| GO_BP_m1GO:004856post-embr    | 2/2606  | 21/23843  | 0.685434 | 0.815813 | 0.77575 | Krtap21-1/  |
| GO_BP_m1GO:007084inclusion b  | 2/2606  | 21/23843  | 0.685434 | 0.815813 | 0.77575 | Dnaja4/Par  |
| GO_BP_m1GO:009773extracellula | 2/2606  | 21/23843  | 0.685434 | 0.815813 | 0.77575 | Park2/Smp   |
| GO_BP_m1GO:190200regulation   | 2/2606  | 21/23843  | 0.685434 | 0.815813 | 0.77575 | C330021F2   |
| GO_BP_m1GO:200020regulation   | 2/2606  | 21/23843  | 0.685434 | 0.815813 | 0.77575 | Cav1/Pthr2  |
| GO_BP_m1GO:200127regulation   | 2/2606  | 21/23843  | 0.685434 | 0.815813 | 0.77575 | Osbp18/Pal  |
| GO_BP_m1GO:000029deadenylat   | 1/2606  | 10/23843  | 0.685789 | 0.815813 | 0.77575 | Noct        |
| GO_BP_m1GO:000209negative re  | 1/2606  | 10/23843  | 0.685789 | 0.815813 | 0.77575 | Fmr1        |
| GO_BP_m1GO:000231marginal z   | 1/2606  | 10/23843  | 0.685789 | 0.815813 | 0.77575 | Dock10      |
| GO_BP_m1GO:000263regulation   | 1/2606  | 10/23843  | 0.685789 | 0.815813 | 0.77575 | Pkn1        |
| GO_BP_m1GO:000263negative re  | 1/2606  | 10/23843  | 0.685789 | 0.815813 | 0.77575 | Prkdc       |
| GO_BP_m1GO:000275MyD88-inc    | 1/2606  | 10/23843  | 0.685789 | 0.815813 | 0.77575 | Ticam2      |
| GO_BP_m1GO:000326regulation   | 1/2606  | 10/23843  | 0.685789 | 0.815813 | 0.77575 | Tbx1        |
| GO_BP_m1GO:000603chitin meta  | 1/2606  | 10/23843  | 0.685789 | 0.815813 | 0.77575 | Chil5       |
| GO_BP_m1GO:000603chitin catak | 1/2606  | 10/23843  | 0.685789 | 0.815813 | 0.77575 | Chil5       |
| GO_BP_m1GO:000624CTP biosyn   | 1/2606  | 10/23843  | 0.685789 | 0.815813 | 0.77575 | Nme6        |
| GO_BP_m1GO:000662posttransla  | 1/2606  | 10/23843  | 0.685789 | 0.815813 | 0.77575 | Folr2       |
| GO_BP_m1GO:000665phosphatic   | 1/2606  | 10/23843  | 0.685789 | 0.815813 | 0.77575 | Ptpmt1      |
| GO_BP_m1GO:000703protein cat  | 1/2606  | 10/23843  | 0.685789 | 0.815813 | 0.77575 | Tcigr1      |
| GO_BP_m1GO:000715neuron cell  | 1/2606  | 10/23843  | 0.685789 | 0.815813 | 0.77575 | Nlgn3       |
| GO_BP_m1GO:000727neuron-ne    | 1/2606  | 10/23843  | 0.685789 | 0.815813 | 0.77575 | Vdac1       |



|                   |               |        |          |          |          |         |          |
|-------------------|---------------|--------|----------|----------|----------|---------|----------|
| GO_BP_m1GO:00076C | phototrans    | 1/2606 | 10/23843 | 0.685789 | 0.815813 | 0.77575 | Opn4     |
| GO_BP_m1GO:00104E | histone H3    | 1/2606 | 10/23843 | 0.685789 | 0.815813 | 0.77575 | Nsd2     |
| GO_BP_m1GO:001061 | regulation    | 1/2606 | 10/23843 | 0.685789 | 0.815813 | 0.77575 | Atp2b4   |
| GO_BP_m1GO:00108C | positive re   | 1/2606 | 10/23843 | 0.685789 | 0.815813 | 0.77575 | Pnpla2   |
| GO_BP_m1GO:00148C | regulation    | 1/2606 | 10/23843 | 0.685789 | 0.815813 | 0.77575 | Pax3     |
| GO_BP_m1GO:00148E | transition t  | 1/2606 | 10/23843 | 0.685789 | 0.815813 | 0.77575 | Myh7     |
| GO_BP_m1GO:00148E | muscle atrc   | 1/2606 | 10/23843 | 0.685789 | 0.815813 | 0.77575 | Gsn      |
| GO_BP_m1GO:001581 | glycine trar  | 1/2606 | 10/23843 | 0.685789 | 0.815813 | 0.77575 | Slc6a20a |
| GO_BP_m1GO:00158C | purine nuc    | 1/2606 | 10/23843 | 0.685789 | 0.815813 | 0.77575 | Slc25a23 |
| GO_BP_m1GO:00159C | coenzyme      | 1/2606 | 10/23843 | 0.685789 | 0.815813 | 0.77575 | Dcakd    |
| GO_BP_m1GO:00218C | cerebral co   | 1/2606 | 10/23843 | 0.685789 | 0.815813 | 0.77575 | Arx      |
| GO_BP_m1GO:002194 | positive re   | 1/2606 | 10/23843 | 0.685789 | 0.815813 | 0.77575 | Smo      |
| GO_BP_m1GO:00308E | positive re   | 1/2606 | 10/23843 | 0.685789 | 0.815813 | 0.77575 | Trib1    |
| GO_BP_m1GO:003127 | positive re   | 1/2606 | 10/23843 | 0.685789 | 0.815813 | 0.77575 | Cdc42ep5 |
| GO_BP_m1GO:003134 | positive re   | 1/2606 | 10/23843 | 0.685789 | 0.815813 | 0.77575 | Anxa2    |
| GO_BP_m1GO:003194 | regulation    | 1/2606 | 10/23843 | 0.685789 | 0.815813 | 0.77575 | Dgkq     |
| GO_BP_m1GO:003211 | sequesterir   | 1/2606 | 10/23843 | 0.685789 | 0.815813 | 0.77575 | Slc30a3  |
| GO_BP_m1GO:003237 | negative re   | 1/2606 | 10/23843 | 0.685789 | 0.815813 | 0.77575 | Pcsk9    |
| GO_BP_m1GO:003237 | negative re   | 1/2606 | 10/23843 | 0.685789 | 0.815813 | 0.77575 | Pcsk9    |
| GO_BP_m1GO:003261 | interleukin   | 1/2606 | 10/23843 | 0.685789 | 0.815813 | 0.77575 | Ccl20    |
| GO_BP_m1GO:00329E | inositol tris | 1/2606 | 10/23843 | 0.685789 | 0.815813 | 0.77575 | P2ry1    |
| GO_BP_m1GO:003357 | transferrin   | 1/2606 | 10/23843 | 0.685789 | 0.815813 | 0.77575 | Rep15    |
| GO_BP_m1GO:00343E | regulation    | 1/2606 | 10/23843 | 0.685789 | 0.815813 | 0.77575 | Prkca    |
| GO_BP_m1GO:00343E | high-densi    | 1/2606 | 10/23843 | 0.685789 | 0.815813 | 0.77575 | Nr1h2    |
| GO_BP_m1GO:003442 | nuclear-tra   | 1/2606 | 10/23843 | 0.685789 | 0.815813 | 0.77575 | Exosc9   |
| GO_BP_m1GO:00346E | cortisol me   | 1/2606 | 10/23843 | 0.685789 | 0.815813 | 0.77575 | Dgkq     |
| GO_BP_m1GO:003572 | common r      | 1/2606 | 10/23843 | 0.685789 | 0.815813 | 0.77575 | Samd9l   |
| GO_BP_m1GO:00359C | dorsal aort   | 1/2606 | 10/23843 | 0.685789 | 0.815813 | 0.77575 | Dll4     |
| GO_BP_m1GO:00359C | tetrahydrof   | 1/2606 | 10/23843 | 0.685789 | 0.815813 | 0.77575 | Shmt1    |
| GO_BP_m1GO:004242 | norepinept    | 1/2606 | 10/23843 | 0.685789 | 0.815813 | 0.77575 | Th       |
| GO_BP_m1GO:00427C | regulation    | 1/2606 | 10/23843 | 0.685789 | 0.815813 | 0.77575 | Snca     |
| GO_BP_m1GO:00433C | negative re   | 1/2606 | 10/23843 | 0.685789 | 0.815813 | 0.77575 | Bcr      |
| GO_BP_m1GO:00434C | regulation    | 1/2606 | 10/23843 | 0.685789 | 0.815813 | 0.77575 | Cd36     |
| GO_BP_m1GO:00436E | linoleic aci  | 1/2606 | 10/23843 | 0.685789 | 0.815813 | 0.77575 | Ephx2    |
| GO_BP_m1GO:004392 | exonucleol    | 1/2606 | 10/23843 | 0.685789 | 0.815813 | 0.77575 | Exosc9   |
| GO_BP_m1GO:00453E | interferon-   | 1/2606 | 10/23843 | 0.685789 | 0.815813 | 0.77575 | Nmi      |
| GO_BP_m1GO:00453E | regulation    | 1/2606 | 10/23843 | 0.685789 | 0.815813 | 0.77575 | Nmi      |
| GO_BP_m1GO:00456C | negative re   | 1/2606 | 10/23843 | 0.685789 | 0.815813 | 0.77575 | Jag1     |
| GO_BP_m1GO:00460C | CTP metab     | 1/2606 | 10/23843 | 0.685789 | 0.815813 | 0.77575 | Nme6     |
| GO_BP_m1GO:00460E | UTP metab     | 1/2606 | 10/23843 | 0.685789 | 0.815813 | 0.77575 | Nme6     |
| GO_BP_m1GO:00482E | vesicle fusi  | 1/2606 | 10/23843 | 0.685789 | 0.815813 | 0.77575 | Stx5a    |
| GO_BP_m1GO:00489C | peripheral    | 1/2606 | 10/23843 | 0.685789 | 0.815813 | 0.77575 | Hoxd10   |
| GO_BP_m1GO:00489C | peripheral    | 1/2606 | 10/23843 | 0.685789 | 0.815813 | 0.77575 | Hoxd10   |
| GO_BP_m1GO:00510C | positive re   | 1/2606 | 10/23843 | 0.685789 | 0.815813 | 0.77575 | Nr1h2    |
| GO_BP_m1GO:005101 | actin filam   | 1/2606 | 10/23843 | 0.685789 | 0.815813 | 0.77575 | Gsn      |
| GO_BP_m1GO:005112 | synaptic gr   | 1/2606 | 10/23843 | 0.685789 | 0.815813 | 0.77575 | Lrp4     |
| GO_BP_m1GO:00514E | corticotrop   | 1/2606 | 10/23843 | 0.685789 | 0.815813 | 0.77575 | Crhbp    |
| GO_BP_m1GO:00516E | maintenan     | 1/2606 | 10/23843 | 0.685789 | 0.815813 | 0.77575 | Pafah1b1 |

|                                       |           |          |          |          |            |
|---------------------------------------|-----------|----------|----------|----------|------------|
| GO_BP_m1GO:005182regulation 1/2606    | 10/23843  | 0.685789 | 0.815813 | 0.77575  | Ncan       |
| GO_BP_m1GO:005191regulation 1/2606    | 10/23843  | 0.685789 | 0.815813 | 0.77575  | F11        |
| GO_BP_m1GO:005197positive reğ1/2606   | 10/23843  | 0.685789 | 0.815813 | 0.77575  | Cartpt     |
| GO_BP_m1GO:00528Cimidazole- 1/2606    | 10/23843  | 0.685789 | 0.815813 | 0.77575  | Hdc        |
| GO_BP_m1GO:006002Bergmann 1/2606      | 10/23843  | 0.685789 | 0.815813 | 0.77575  | Abl2       |
| GO_BP_m1GO:006021primitive hı1/2606   | 10/23843  | 0.685789 | 0.815813 | 0.77575  | Stk3       |
| GO_BP_m1GO:006051prostatic bı1/2606   | 10/23843  | 0.685789 | 0.815813 | 0.77575  | Nog        |
| GO_BP_m1GO:006089neural platı1/2606   | 10/23843  | 0.685789 | 0.815813 | 0.77575  | Nog        |
| GO_BP_m1GO:006098coronary aı1/2606    | 10/23843  | 0.685789 | 0.815813 | 0.77575  | Tbx1       |
| GO_BP_m1GO:006108regulation 1/2606    | 10/23843  | 0.685789 | 0.815813 | 0.77575  | Slc30a3    |
| GO_BP_m1GO:007007proton-traı1/2606    | 10/23843  | 0.685789 | 0.815813 | 0.77575  | Tcirq1     |
| GO_BP_m1GO:007007vacuolar pr1/2606    | 10/23843  | 0.685789 | 0.815813 | 0.77575  | Tcirq1     |
| GO_BP_m1GO:007009regulation 1/2606    | 10/23843  | 0.685789 | 0.815813 | 0.77575  | Cartpt     |
| GO_BP_m1GO:007025positive reğ1/2606   | 10/23843  | 0.685789 | 0.815813 | 0.77575  | P2ry2      |
| GO_BP_m1GO:007039response tr1/2606    | 10/23843  | 0.685789 | 0.815813 | 0.77575  | Cd36       |
| GO_BP_m1GO:007088negative re1/2606    | 10/23843  | 0.685789 | 0.815813 | 0.77575  | Atp2b4     |
| GO_BP_m1GO:007122cellular resı1/2606  | 10/23843  | 0.685789 | 0.815813 | 0.77575  | Cd36       |
| GO_BP_m1GO:007188macrophagı1/2606     | 10/23843  | 0.685789 | 0.815813 | 0.77575  | St6gal1    |
| GO_BP_m1GO:007217metanephı1/2606      | 10/23843  | 0.685789 | 0.815813 | 0.77575  | Lgr4       |
| GO_BP_m1GO:00726Cinterleukin-1/2606   | 10/23843  | 0.685789 | 0.815813 | 0.77575  | Pycard     |
| GO_BP_m1GO:007552IRES-depeı1/2606     | 10/23843  | 0.685789 | 0.815813 | 0.77575  | Eif3f      |
| GO_BP_m1GO:00900Cprimitive st1/2606   | 10/23843  | 0.685789 | 0.815813 | 0.77575  | Foxa2      |
| GO_BP_m1GO:009012positive reğ1/2606   | 10/23843  | 0.685789 | 0.815813 | 0.77575  | Cdc20      |
| GO_BP_m1GO:009018regulation 1/2606    | 10/23843  | 0.685789 | 0.815813 | 0.77575  | Nr1h2      |
| GO_BP_m1GO:009742liver regenı1/2606   | 10/23843  | 0.685789 | 0.815813 | 0.77575  | Ezh1       |
| GO_BP_m1GO:010605negative re1/2606    | 10/23843  | 0.685789 | 0.815813 | 0.77575  | Atp2b4     |
| GO_BP_m1GO:190003negative re1/2606    | 10/23843  | 0.685789 | 0.815813 | 0.77575  | Ogt        |
| GO_BP_m1GO:19001Cpositive reğ1/2606   | 10/23843  | 0.685789 | 0.815813 | 0.77575  | Bok        |
| GO_BP_m1GO:190011regulation 1/2606    | 10/23843  | 0.685789 | 0.815813 | 0.77575  | Dmrtc2     |
| GO_BP_m1GO:190011negative re1/2606    | 10/23843  | 0.685789 | 0.815813 | 0.77575  | Dffa       |
| GO_BP_m1GO:190103positive reğ1/2606   | 10/23843  | 0.685789 | 0.815813 | 0.77575  | Bok        |
| GO_BP_m1GO:19014Cregulation 1/2606    | 10/23843  | 0.685789 | 0.815813 | 0.77575  | Ccnl1      |
| GO_BP_m1GO:190167iron coordı1/2606    | 10/23843  | 0.685789 | 0.815813 | 0.77575  | Slc46a1    |
| GO_BP_m1GO:190197positive reğ1/2606   | 10/23843  | 0.685789 | 0.815813 | 0.77575  | Tpr        |
| GO_BP_m1GO:190241regulation 1/2606    | 10/23843  | 0.685789 | 0.815813 | 0.77575  | Fmr1       |
| GO_BP_m1GO:190293negative re1/2606    | 10/23843  | 0.685789 | 0.815813 | 0.77575  | Nfkb1      |
| GO_BP_m1GO:190381negative re1/2606    | 10/23843  | 0.685789 | 0.815813 | 0.77575  | Cav1       |
| GO_BP_m1GO:190568regulation 1/2606    | 10/23843  | 0.685789 | 0.815813 | 0.77575  | Ezr        |
| GO_BP_m1GO:190568positive reğ1/2606   | 10/23843  | 0.685789 | 0.815813 | 0.77575  | Ezr        |
| GO_BP_m1GO:199017protein loc 1/2606   | 10/23843  | 0.685789 | 0.815813 | 0.77575  | Cct3       |
| GO_BP_m1GO:20001Cregulation 1/2606    | 10/23843  | 0.685789 | 0.815813 | 0.77575  | St6gal1    |
| GO_BP_m1GO:200034positive reğ1/2606   | 10/23843  | 0.685789 | 0.815813 | 0.77575  | Hyal3      |
| GO_BP_m1GO:003297regulation 39/2606   | 380/23843 | 0.68683  | 0.816942 | 0.776823 | Abra/Abraç |
| GO_BP_m1GO:009874cell-cell ad 17/2606 | 170/23843 | 0.687698 | 0.817068 | 0.776943 | Cadm1/Cd   |
| GO_BP_m1GO:000597glycogen b4/2606     | 42/23843  | 0.688053 | 0.817068 | 0.776943 | Esrrb/Gys1 |
| GO_BP_m1GO:000708mitotic me4/2606     | 42/23843  | 0.688053 | 0.817068 | 0.776943 | Ankrd53/C  |
| GO_BP_m1GO:000925glucan bio4/2606     | 42/23843  | 0.688053 | 0.817068 | 0.776943 | Esrrb/Gys1 |
| GO_BP_m1GO:001079regulation 4/2606    | 42/23843  | 0.688053 | 0.817068 | 0.776943 | Dgkq/Ogt/  |

|                                       |           |          |          |          |              |
|---------------------------------------|-----------|----------|----------|----------|--------------|
| GO_BP_m1GO:001097negative re4/2606    | 42/23843  | 0.688053 | 0.817068 | 0.776943 | Blm/Ccng1    |
| GO_BP_m1GO:003105negative re4/2606    | 42/23843  | 0.688053 | 0.817068 | 0.776943 | H2afy/Msx    |
| GO_BP_m1GO:003288regulation 4/2606    | 42/23843  | 0.688053 | 0.817068 | 0.776943 | Esrrb/Has2   |
| GO_BP_m1GO:003305cellular pig4/2606   | 42/23843  | 0.688053 | 0.817068 | 0.776943 | Bloc1s5/Cc   |
| GO_BP_m1GO:004277intrinsic ap4/2606   | 42/23843  | 0.688053 | 0.817068 | 0.776943 | Cdkn1a/Nu    |
| GO_BP_m1GO:006013maternal p4/2606     | 42/23843  | 0.688053 | 0.817068 | 0.776943 | Cdh1/Ctsl/   |
| GO_BP_m1GO:007266establishm4/2606     | 42/23843  | 0.688053 | 0.817068 | 0.776943 | Cacng5/Ca    |
| GO_BP_m1GO:006054respiratory 25/2606  | 247/23843 | 0.688677 | 0.8177   | 0.777544 | Abca12/Alc   |
| GO_BP_m1GO:00027C positive reç10/2606 | 102/23843 | 0.689085 | 0.817963 | 0.777794 | Cadm1/Far    |
| GO_BP_m1GO:004518maintenanç10/2606    | 102/23843 | 0.689085 | 0.817963 | 0.777794 | Cav1/Cdk5    |
| GO_BP_m1GO:000758body fluid :11/2606  | 112/23843 | 0.691231 | 0.820288 | 0.780005 | Adora1/An    |
| GO_BP_m1GO:004247inner ear r11/2606   | 112/23843 | 0.691231 | 0.820288 | 0.780005 | Aldh1a3/Bc   |
| GO_BP_m1GO:00309C hindbrain c16/2606  | 161/23843 | 0.694083 | 0.823423 | 0.782986 | Abl2/Cdk5,   |
| GO_BP_m1GO:00170C cytochromç3/2606    | 32/23843  | 0.694904 | 0.823423 | 0.782986 | Cox15/Slc2   |
| GO_BP_m1GO:004574positive reç3/2606   | 32/23843  | 0.694904 | 0.823423 | 0.782986 | Acpp/Drd3    |
| GO_BP_m1GO:005086negative re3/2606    | 32/23843  | 0.694904 | 0.823423 | 0.782986 | Ctla4/Il10/I |
| GO_BP_m1GO:00603E cartilage dç3/2606  | 32/23843  | 0.694904 | 0.823423 | 0.782986 | Poc1a/Porç   |
| GO_BP_m1GO:00801E regulation 3/2606   | 32/23843  | 0.694904 | 0.823423 | 0.782986 | Hyal3/Pkdr   |
| GO_BP_m1GO:008502extracellula3/2606   | 32/23843  | 0.694904 | 0.823423 | 0.782986 | Antxr1/Fblr  |
| GO_BP_m1GO:19021E regulation 3/2606   | 32/23843  | 0.694904 | 0.823423 | 0.782986 | Pcx/Trim31   |
| GO_BP_m1GO:190247L-alpha-arç3/2606    | 32/23843  | 0.694904 | 0.823423 | 0.782986 | Arl6ip5/AU   |
| GO_BP_m1GO:19052C positive reç3/2606  | 32/23843  | 0.694904 | 0.823423 | 0.782986 | Akap6/Nrg    |
| GO_BP_m1GO:200003regulation 3/2606    | 32/23843  | 0.694904 | 0.823423 | 0.782986 | Esrrb/Kdmç   |
| GO_BP_m1GO:000736gastrulatioç17/2606  | 171/23843 | 0.696958 | 0.825745 | 0.785194 | Cfc1/Nat8f   |
| GO_BP_m1GO:000334cilium mov7/2606     | 73/23843  | 0.698523 | 0.827377 | 0.786745 | Bbs2/Ccdç    |
| GO_BP_m1GO:006096regulation 7/2606    | 73/23843  | 0.698523 | 0.827377 | 0.786745 | Apobec1/C    |
| GO_BP_m1GO:190007regulation 8/2606    | 83/23843  | 0.698747 | 0.82753  | 0.786892 | Gpr21/Nuc    |
| GO_BP_m1GO:004396histone H4 6/2606    | 63/23843  | 0.699236 | 0.827887 | 0.787231 | Hat1/Kansl   |
| GO_BP_m1GO:00973C cellular resç6/2606 | 63/23843  | 0.699236 | 0.827887 | 0.787231 | Blm/Cdh1/    |
| GO_BP_m1GO:000661protein tarç10/2606  | 103/23843 | 0.700884 | 0.829726 | 0.78898  | Adora1/Cd    |
| GO_BP_m1GO:000304regulation 5/2606    | 53/23843  | 0.701411 | 0.830015 | 0.789254 | Adra1d/Av    |
| GO_BP_m1GO:003506regulation 5/2606    | 53/23843  | 0.701411 | 0.830015 | 0.789254 | Fln/Kat2a,   |
| GO_BP_m1GO:190288negative re5/2606    | 53/23843  | 0.701411 | 0.830015 | 0.789254 | Gpx1/H2af    |
| GO_BP_m1GO:002203metenceph11/2606     | 113/23843 | 0.702476 | 0.831162 | 0.790345 | Abl2/Cdk5,   |
| GO_BP_m1GO:000182blastocyst ç4/2606   | 43/23843  | 0.70601  | 0.834423 | 0.793446 | Cdh1/Esrrb   |
| GO_BP_m1GO:00311C axon reger4/2606    | 43/23843  | 0.70601  | 0.834423 | 0.793446 | Fkbp1b/Klk   |
| GO_BP_m1GO:00327E positive reç4/2606  | 43/23843  | 0.70601  | 0.834423 | 0.793446 | Hyal2/Pyca   |
| GO_BP_m1GO:008601membrane 4/2606      | 43/23843  | 0.70601  | 0.834423 | 0.793446 | Cacnb2/Ca    |
| GO_BP_m1GO:009031negative re4/2606    | 43/23843  | 0.70601  | 0.834423 | 0.793446 | Cdk5/Ei24/   |
| GO_BP_m1GO:004859camera-tyç13/2606    | 133/23843 | 0.706256 | 0.834423 | 0.793446 | Aldh1a3/Bc   |
| GO_BP_m1GO:000191negative re2/2606    | 22/23843  | 0.710222 | 0.834423 | 0.793446 | Ptpcr/Sh2d   |
| GO_BP_m1GO:000283regulation 2/2606    | 22/23843  | 0.710222 | 0.834423 | 0.793446 | Il12b/Ulbpç  |
| GO_BP_m1GO:000283regulation 2/2606    | 22/23843  | 0.710222 | 0.834423 | 0.793446 | Il12b/Ulbpç  |
| GO_BP_m1GO:00033E epithelial c2/2606  | 22/23843  | 0.710222 | 0.834423 | 0.793446 | Dnah1/Ulkç   |
| GO_BP_m1GO:000654glutamine ç2/2606    | 22/23843  | 0.710222 | 0.834423 | 0.793446 | Gfpt2/Gls    |
| GO_BP_m1GO:000853respiratory 2/2606   | 22/23843  | 0.710222 | 0.834423 | 0.793446 | Cox15/Smi    |
| GO_BP_m1GO:002154subpallium 2/2606    | 22/23843  | 0.710222 | 0.834423 | 0.793446 | Aldh1a3/Bl   |
| GO_BP_m1GO:00302E growth hor2/2606    | 22/23843  | 0.710222 | 0.834423 | 0.793446 | Arhgef7/Se   |

|                   |               |         |           |          |          |          |              |
|-------------------|---------------|---------|-----------|----------|----------|----------|--------------|
| GO_BP_m1GO:003272 | positive re   | 2/2606  | 22/23843  | 0.710222 | 0.834423 | 0.793446 | Mmp12/Pt     |
| GO_BP_m1GO:004348 | histone exc   | 2/2606  | 22/23843  | 0.710222 | 0.834423 | 0.793446 | Psme4/Syc    |
| GO_BP_m1GO:004560 | positive re   | 2/2606  | 22/23843  | 0.710222 | 0.834423 | 0.793446 | Foxc1/H2a    |
| GO_BP_m1GO:004884 | negative re   | 2/2606  | 22/23843  | 0.710222 | 0.834423 | 0.793446 | Sema3f/Wi    |
| GO_BP_m1GO:005085 | positive re   | 2/2606  | 22/23843  | 0.710222 | 0.834423 | 0.793446 | Kcnn4/Ptpr   |
| GO_BP_m1GO:005187 | pigment gr    | 2/2606  | 22/23843  | 0.710222 | 0.834423 | 0.793446 | Bloc1s5/Ra   |
| GO_BP_m1GO:006007 | synapse m     | 2/2606  | 22/23843  | 0.710222 | 0.834423 | 0.793446 | Cdc20/Sez    |
| GO_BP_m1GO:006096 | negative re   | 2/2606  | 22/23843  | 0.710222 | 0.834423 | 0.793446 | Apobec1/Z    |
| GO_BP_m1GO:007121 | cellular res  | 2/2606  | 22/23843  | 0.710222 | 0.834423 | 0.793446 | Ufd1/Uggt    |
| GO_BP_m1GO:007257 | hepatocyte    | 2/2606  | 22/23843  | 0.710222 | 0.834423 | 0.793446 | lfng/Wnt3a   |
| GO_BP_m1GO:007257 | epithelial c  | 2/2606  | 22/23843  | 0.710222 | 0.834423 | 0.793446 | lfng/Wnt3a   |
| GO_BP_m1GO:190027 | positive re   | 2/2606  | 22/23843  | 0.710222 | 0.834423 | 0.793446 | Cpeb3/Grir   |
| GO_BP_m1GO:190138 | negative re   | 2/2606  | 22/23843  | 0.710222 | 0.834423 | 0.793446 | Cav1/Cav3    |
| GO_BP_m1GO:190320 | negative re   | 2/2606  | 22/23843  | 0.710222 | 0.834423 | 0.793446 | Il10/Park2   |
| GO_BP_m1GO:190364 | regulation    | 2/2606  | 22/23843  | 0.710222 | 0.834423 | 0.793446 | Dnajc13/Ez   |
| GO_BP_m1GO:190386 | positive re   | 2/2606  | 22/23843  | 0.710222 | 0.834423 | 0.793446 | Cpne6/Parl   |
| GO_BP_m1GO:200063 | positive re   | 2/2606  | 22/23843  | 0.710222 | 0.834423 | 0.793446 | Fmr1/Nfkb    |
| GO_BP_m1GO:200073 | positive re   | 2/2606  | 22/23843  | 0.710222 | 0.834423 | 0.793446 | Foxc1/Mir3   |
| GO_BP_m1GO:200083 | regulation    | 2/2606  | 22/23843  | 0.710222 | 0.834423 | 0.793446 | Galr1/Tac1   |
| GO_BP_m1GO:011002 | regulation    | 9/2606  | 94/23843  | 0.711713 | 0.834423 | 0.793446 | Cav3/Ctgf/   |
| GO_BP_m1GO:003250 | maintenan     | 7/2606  | 74/23843  | 0.712133 | 0.834423 | 0.793446 | Cav1/Cdk5    |
| GO_BP_m1GO:004883 | inner ear d   | 20/2606 | 202/23843 | 0.713736 | 0.834423 | 0.793446 | Aldh1a3/Ai   |
| GO_BP_m1GO:006038 | pathway-r     | 6/2606  | 64/23843  | 0.713806 | 0.834423 | 0.793446 | Bmp3/Gdf     |
| GO_BP_m1GO:006042 | lung morpl    | 6/2606  | 64/23843  | 0.713806 | 0.834423 | 0.793446 | Cfc1/Fgf7/I  |
| GO_BP_m1GO:000701 | microtubul    | 26/2606 | 260/23843 | 0.714293 | 0.834423 | 0.793446 | Bbs2/Bloc1   |
| GO_BP_m1GO:003021 | erythrocyte   | 12/2606 | 124/23843 | 0.714807 | 0.834423 | 0.793446 | Bpgm/Jak3    |
| GO_BP_m1GO:000177 | myeloid de    | 3/2606  | 33/23843  | 0.715018 | 0.834423 | 0.793446 | Il10/Pycard  |
| GO_BP_m1GO:000761 | mating bel    | 3/2606  | 33/23843  | 0.715018 | 0.834423 | 0.793446 | Avpr1a/Drc   |
| GO_BP_m1GO:003262 | interleukin   | 3/2606  | 33/23843  | 0.715018 | 0.834423 | 0.793446 | lfng/Il12b/I |
| GO_BP_m1GO:003303 | regulation    | 3/2606  | 33/23843  | 0.715018 | 0.834423 | 0.793446 | Hcar2/Kitl/  |
| GO_BP_m1GO:004562 | regulation    | 3/2606  | 33/23843  | 0.715018 | 0.834423 | 0.793446 | Jak3/Smad    |
| GO_BP_m1GO:004646 | neutral lipi  | 3/2606  | 33/23843  | 0.715018 | 0.834423 | 0.793446 | Mgll/Plin5/  |
| GO_BP_m1GO:004646 | acylglycerc   | 3/2606  | 33/23843  | 0.715018 | 0.834423 | 0.793446 | Mgll/Plin5/  |
| GO_BP_m1GO:004804 | embryonic     | 3/2606  | 33/23843  | 0.715018 | 0.834423 | 0.793446 | Aldh1a3/Kc   |
| GO_BP_m1GO:005068 | negative re   | 3/2606  | 33/23843  | 0.715018 | 0.834423 | 0.793446 | Rbm42/Srs    |
| GO_BP_m1GO:005509 | acylglycerc   | 3/2606  | 33/23843  | 0.715018 | 0.834423 | 0.793446 | Angptl3/C1   |
| GO_BP_m1GO:006070 | cell differer | 3/2606  | 33/23843  | 0.715018 | 0.834423 | 0.793446 | E2f7/Plk4/S  |
| GO_BP_m1GO:007032 | triglyceride  | 3/2606  | 33/23843  | 0.715018 | 0.834423 | 0.793446 | Angptl3/C1   |
| GO_BP_m1GO:190109 | negative re   | 3/2606  | 33/23843  | 0.715018 | 0.834423 | 0.793446 | Gdnf/Il17/St |
| GO_BP_m1GO:190320 | regulation    | 3/2606  | 33/23843  | 0.715018 | 0.834423 | 0.793446 | Endog/Hsp    |
| GO_BP_m1GO:200124 | negative re   | 3/2606  | 33/23843  | 0.715018 | 0.834423 | 0.793446 | Gdnf/Il17/St |
| GO_BP_m1GO:004206 | wound hea     | 34/2606 | 337/23843 | 0.716105 | 0.834423 | 0.793446 | Abat/Acta2   |
| GO_BP_m1GO:004274 | defense re    | 45/2606 | 442/23843 | 0.716821 | 0.834423 | 0.793446 | 1700016DC    |
| GO_BP_m1GO:004259 | fear respor   | 5/2606  | 54/23843  | 0.717148 | 0.834423 | 0.793446 | Eif4e/Grin2  |
| GO_BP_m1GO:007266 | protein loc   | 5/2606  | 54/23843  | 0.717148 | 0.834423 | 0.793446 | Cacng5/Ca    |
| GO_BP_m1GO:000701 | actin filam   | 39/2606 | 385/23843 | 0.717618 | 0.834423 | 0.793446 | Abi1/Abi2/   |
| GO_BP_m1GO:000168 | tRNA 5'-le    | 1/2606  | 11/23843  | 0.720146 | 0.834423 | 0.793446 | Rpp40        |
| GO_BP_m1GO:000213 | retinoic aci  | 1/2606  | 11/23843  | 0.720146 | 0.834423 | 0.793446 | Aldh1a3      |

|          |           |              |        |          |          |          |          |          |
|----------|-----------|--------------|--------|----------|----------|----------|----------|----------|
| GO_BP_m1 | GO:000267 | regulation   | 1/2606 | 11/23843 | 0.720146 | 0.834423 | 0.793446 | Il10     |
| GO_BP_m1 | GO:000292 | negative re  | 1/2606 | 11/23843 | 0.720146 | 0.834423 | 0.793446 | Susd4    |
| GO_BP_m1 | GO:000326 | cardioblast  | 1/2606 | 11/23843 | 0.720146 | 0.834423 | 0.793446 | Tbx1     |
| GO_BP_m1 | GO:000326 | regulation   | 1/2606 | 11/23843 | 0.720146 | 0.834423 | 0.793446 | Tbx1     |
| GO_BP_m1 | GO:000330 | Wnt signali  | 1/2606 | 11/23843 | 0.720146 | 0.834423 | 0.793446 | Wnt3a    |
| GO_BP_m1 | GO:000605 | N-acetylne   | 1/2606 | 11/23843 | 0.720146 | 0.834423 | 0.793446 | St6gal1  |
| GO_BP_m1 | GO:000618 | GTP biosyn   | 1/2606 | 11/23843 | 0.720146 | 0.834423 | 0.793446 | Nme6     |
| GO_BP_m1 | GO:000650 | C-terminal   | 1/2606 | 11/23843 | 0.720146 | 0.834423 | 0.793446 | Wipi2    |
| GO_BP_m1 | GO:000675 | glutathione  | 1/2606 | 11/23843 | 0.720146 | 0.834423 | 0.793446 | Gclm     |
| GO_BP_m1 | GO:000697 | DNA dama     | 1/2606 | 11/23843 | 0.720146 | 0.834423 | 0.793446 | Cdkn1a   |
| GO_BP_m1 | GO:000698 | ER overloa   | 1/2606 | 11/23843 | 0.720146 | 0.834423 | 0.793446 | Atg10    |
| GO_BP_m1 | GO:000712 | meiotic prc  | 1/2606 | 11/23843 | 0.720146 | 0.834423 | 0.793446 | Topaz1   |
| GO_BP_m1 | GO:000809 | retrograde   | 1/2606 | 11/23843 | 0.720146 | 0.834423 | 0.793446 | Pafah1b1 |
| GO_BP_m1 | GO:000920 | pyrimidine   | 1/2606 | 11/23843 | 0.720146 | 0.834423 | 0.793446 | Nme6     |
| GO_BP_m1 | GO:000981 | flavonoid n  | 1/2606 | 11/23843 | 0.720146 | 0.834423 | 0.793446 | Ugt1a9   |
| GO_BP_m1 | GO:001074 | positive re  | 1/2606 | 11/23843 | 0.720146 | 0.834423 | 0.793446 | Cd36     |
| GO_BP_m1 | GO:001483 | urinary bla  | 1/2606 | 11/23843 | 0.720146 | 0.834423 | 0.793446 | Htr7     |
| GO_BP_m1 | GO:001484 | regulation   | 1/2606 | 11/23843 | 0.720146 | 0.834423 | 0.793446 | Ephb1    |
| GO_BP_m1 | GO:001487 | response tr  | 1/2606 | 11/23843 | 0.720146 | 0.834423 | 0.793446 | Prkag3   |
| GO_BP_m1 | GO:001574 | C4-dicarb    | 1/2606 | 11/23843 | 0.720146 | 0.834423 | 0.793446 | Abat     |
| GO_BP_m1 | GO:001610 | diterpenoi   | 1/2606 | 11/23843 | 0.720146 | 0.834423 | 0.793446 | Aldh1a3  |
| GO_BP_m1 | GO:001655 | base conve   | 1/2606 | 11/23843 | 0.720146 | 0.834423 | 0.793446 | Apobec1  |
| GO_BP_m1 | GO:001829 | protein-ch   | 1/2606 | 11/23843 | 0.720146 | 0.834423 | 0.793446 | Opn4     |
| GO_BP_m1 | GO:001953 | oxalate tra  | 1/2606 | 11/23843 | 0.720146 | 0.834423 | 0.793446 | Slc26a7  |
| GO_BP_m1 | GO:002155 | trigeminal   | 1/2606 | 11/23843 | 0.720146 | 0.834423 | 0.793446 | Sema3f   |
| GO_BP_m1 | GO:002168 | cerebellar   | 1/2606 | 11/23843 | 0.720146 | 0.834423 | 0.793446 | Wnt7a    |
| GO_BP_m1 | GO:002170 | cerebellar   | 1/2606 | 11/23843 | 0.720146 | 0.834423 | 0.793446 | Wnt7a    |
| GO_BP_m1 | GO:003103 | myosin fila  | 1/2606 | 11/23843 | 0.720146 | 0.834423 | 0.793446 | Rap1gds1 |
| GO_BP_m1 | GO:003127 | regulation   | 1/2606 | 11/23843 | 0.720146 | 0.834423 | 0.793446 | Cdc42ep5 |
| GO_BP_m1 | GO:003202 | response tr  | 1/2606 | 11/23843 | 0.720146 | 0.834423 | 0.793446 | Snca     |
| GO_BP_m1 | GO:003204 | cardiolipin  | 1/2606 | 11/23843 | 0.720146 | 0.834423 | 0.793446 | Ptpmt1   |
| GO_BP_m1 | GO:003246 | negative re  | 1/2606 | 11/23843 | 0.720146 | 0.834423 | 0.793446 | Pex5     |
| GO_BP_m1 | GO:003323 | negative re  | 1/2606 | 11/23843 | 0.720146 | 0.834423 | 0.793446 | Hmg20a   |
| GO_BP_m1 | GO:003360 | positive re  | 1/2606 | 11/23843 | 0.720146 | 0.834423 | 0.793446 | Htr6     |
| GO_BP_m1 | GO:003363 | cell-cell ad | 1/2606 | 11/23843 | 0.720146 | 0.834423 | 0.793446 | Npnt     |
| GO_BP_m1 | GO:003370 | phospholi    | 1/2606 | 11/23843 | 0.720146 | 0.834423 | 0.793446 | Abca12   |
| GO_BP_m1 | GO:003411 | positive re  | 1/2606 | 11/23843 | 0.720146 | 0.834423 | 0.793446 | Gcnt2    |
| GO_BP_m1 | GO:003526 | protein O-   | 1/2606 | 11/23843 | 0.720146 | 0.834423 | 0.793446 | Pomgnt2  |
| GO_BP_m1 | GO:003563 | bone mine    | 1/2606 | 11/23843 | 0.720146 | 0.834423 | 0.793446 | Rflna    |
| GO_BP_m1 | GO:003584 | photorecep   | 1/2606 | 11/23843 | 0.720146 | 0.834423 | 0.793446 | Tmem67   |
| GO_BP_m1 | GO:003588 | amacrine c   | 1/2606 | 11/23843 | 0.720146 | 0.834423 | 0.793446 | Foxn4    |
| GO_BP_m1 | GO:003818 | nerve grow   | 1/2606 | 11/23843 | 0.720146 | 0.834423 | 0.793446 | Ntf5     |
| GO_BP_m1 | GO:004355 | skin morph   | 1/2606 | 11/23843 | 0.720146 | 0.834423 | 0.793446 | Wnt7a    |
| GO_BP_m1 | GO:004361 | regulation   | 1/2606 | 11/23843 | 0.720146 | 0.834423 | 0.793446 | Cd36     |
| GO_BP_m1 | GO:004455 | relaxation   | 1/2606 | 11/23843 | 0.720146 | 0.834423 | 0.793446 | Adora1   |
| GO_BP_m1 | GO:004508 | positive re  | 1/2606 | 11/23843 | 0.720146 | 0.834423 | 0.793446 | Glmn     |
| GO_BP_m1 | GO:004519 | maintenan    | 1/2606 | 11/23843 | 0.720146 | 0.834423 | 0.793446 | Lrrd1    |
| GO_BP_m1 | GO:004564 | negative re  | 1/2606 | 11/23843 | 0.720146 | 0.834423 | 0.793446 | Lmo2     |

|                                       |          |          |          |          |             |
|---------------------------------------|----------|----------|----------|----------|-------------|
| GO_BP_m1GO:00463εdeoxyribos 1/2606    | 11/23843 | 0.720146 | 0.834423 | 0.793446 | Nudt1       |
| GO_BP_m1GO:00466εresponse tr1/2606    | 11/23843 | 0.720146 | 0.834423 | 0.793446 | Pgam2       |
| GO_BP_m1GO:00482εdeterminat 1/2606    | 11/23843 | 0.720146 | 0.834423 | 0.793446 | Grem2       |
| GO_BP_m1GO:00482εdeterminat 1/2606    | 11/23843 | 0.720146 | 0.834423 | 0.793446 | Grem2       |
| GO_BP_m1GO:00485εpost-embr 1/2606     | 11/23843 | 0.720146 | 0.834423 | 0.793446 | Mir23a      |
| GO_BP_m1GO:00486εskeletal m 1/2606    | 11/23843 | 0.720146 | 0.834423 | 0.793446 | Rps6kb1     |
| GO_BP_m1GO:00486εpositive re 1/2606   | 11/23843 | 0.720146 | 0.834423 | 0.793446 | Fkbp1b      |
| GO_BP_m1GO:004884venous blo 1/2606    | 11/23843 | 0.720146 | 0.834423 | 0.793446 | Ephb4       |
| GO_BP_m1GO:005132prophase 1/2606      | 11/23843 | 0.720146 | 0.834423 | 0.793446 | Topaz1      |
| GO_BP_m1GO:00516Cexocyst loc 1/2606   | 11/23843 | 0.720146 | 0.834423 | 0.793446 | Exoc3l2     |
| GO_BP_m1GO:006001righting re1/2606    | 11/23843 | 0.720146 | 0.834423 | 0.793446 | Aldh1a3     |
| GO_BP_m1GO:00600E mammary 1/2606      | 11/23843 | 0.720146 | 0.834423 | 0.793446 | Cav1        |
| GO_BP_m1GO:006017limb bud fc 1/2606   | 11/23843 | 0.720146 | 0.834423 | 0.793446 | Plxna2      |
| GO_BP_m1GO:006034positive re 1/2606   | 11/23843 | 0.720146 | 0.834423 | 0.793446 | Mmp12       |
| GO_BP_m1GO:00604E positive re 1/2606  | 11/23843 | 0.720146 | 0.834423 | 0.793446 | Ctgf        |
| GO_BP_m1GO:00607εregulation 1/2606    | 11/23843 | 0.720146 | 0.834423 | 0.793446 | Serpinf1    |
| GO_BP_m1GO:006087semicircula 1/2606   | 11/23843 | 0.720146 | 0.834423 | 0.793446 | Tbx1        |
| GO_BP_m1GO:00609Cembryonic 1/2606     | 11/23843 | 0.720146 | 0.834423 | 0.793446 | Aldh1a3     |
| GO_BP_m1GO:00613Ccardiac net 1/2606   | 11/23843 | 0.720146 | 0.834423 | 0.793446 | Jag1        |
| GO_BP_m1GO:00613εpositive re 1/2606   | 11/23843 | 0.720146 | 0.834423 | 0.793446 | Nr1h2       |
| GO_BP_m1GO:006161glycolytic p 1/2606  | 11/23843 | 0.720146 | 0.834423 | 0.793446 | Pfkl        |
| GO_BP_m1GO:00700εglucagon s 1/2606    | 11/23843 | 0.720146 | 0.834423 | 0.793446 | Cartpt      |
| GO_BP_m1GO:007094neutrophil 1/2606    | 11/23843 | 0.720146 | 0.834423 | 0.793446 | Arg1        |
| GO_BP_m1GO:00716εpositive re 1/2606   | 11/23843 | 0.720146 | 0.834423 | 0.793446 | Trpv4       |
| GO_BP_m1GO:007167commissur 1/2606     | 11/23843 | 0.720146 | 0.834423 | 0.793446 | Smo         |
| GO_BP_m1GO:00721Cglomerulus 1/2606    | 11/23843 | 0.720146 | 0.834423 | 0.793446 | Pdgfra      |
| GO_BP_m1GO:00721εregulation 1/2606    | 11/23843 | 0.720146 | 0.834423 | 0.793446 | Osr1        |
| GO_BP_m1GO:00723εmicrotubul 1/2606    | 11/23843 | 0.720146 | 0.834423 | 0.793446 | Ccdc68      |
| GO_BP_m1GO:008601AV node c 1/2606     | 11/23843 | 0.720146 | 0.834423 | 0.793446 | Cacnb2      |
| GO_BP_m1GO:008602AV node c 1/2606     | 11/23843 | 0.720146 | 0.834423 | 0.793446 | Cacnb2      |
| GO_BP_m1GO:009007positive re 1/2606   | 11/23843 | 0.720146 | 0.834423 | 0.793446 | Trhr        |
| GO_BP_m1GO:009014membrane 1/2606      | 11/23843 | 0.720146 | 0.834423 | 0.793446 | Dnm3        |
| GO_BP_m1GO:00901εGolgi ribbc 1/2606   | 11/23843 | 0.720146 | 0.834423 | 0.793446 | Tmed5       |
| GO_BP_m1GO:00905E establishm 1/2606   | 11/23843 | 0.720146 | 0.834423 | 0.793446 | Cldn1       |
| GO_BP_m1GO:00987εpre-mRNA 1/2606      | 11/23843 | 0.720146 | 0.834423 | 0.793446 | Cpsf4       |
| GO_BP_m1GO:19016εcalcium ior 1/2606   | 11/23843 | 0.720146 | 0.834423 | 0.793446 | Atp2b4      |
| GO_BP_m1GO:19020Cpositive re 1/2606   | 11/23843 | 0.720146 | 0.834423 | 0.793446 | Csnk1e      |
| GO_BP_m1GO:19023E sulfate tran 1/2606 | 11/23843 | 0.720146 | 0.834423 | 0.793446 | Slc26a7     |
| GO_BP_m1GO:19024εnegative re 1/2606   | 11/23843 | 0.720146 | 0.834423 | 0.793446 | C330021F2   |
| GO_BP_m1GO:19035εregulation 1/2606    | 11/23843 | 0.720146 | 0.834423 | 0.793446 | Dll4        |
| GO_BP_m1GO:19036εpositive re 1/2606   | 11/23843 | 0.720146 | 0.834423 | 0.793446 | Ezr         |
| GO_BP_m1GO:190372regulation 1/2606    | 11/23843 | 0.720146 | 0.834423 | 0.793446 | Gsn         |
| GO_BP_m1GO:19038εextraembry 1/2606    | 11/23843 | 0.720146 | 0.834423 | 0.793446 | E2f7        |
| GO_BP_m1GO:19041Eregulation 1/2606    | 11/23843 | 0.720146 | 0.834423 | 0.793446 | Bcap31      |
| GO_BP_m1GO:20000εregulation 1/2606    | 11/23843 | 0.720146 | 0.834423 | 0.793446 | Esrrb       |
| GO_BP_m1GO:200057regulation 1/2606    | 11/23843 | 0.720146 | 0.834423 | 0.793446 | Pafah1b1    |
| GO_BP_m1GO:200061regulation 1/2606    | 11/23843 | 0.720146 | 0.834423 | 0.793446 | Kat2b       |
| GO_BP_m1GO:00097εaxis specifir 9/2606 | 95/23843 | 0.723506 | 0.838206 | 0.797043 | Foxa2/lft17 |

|                                |         |           |          |          |          |             |
|--------------------------------|---------|-----------|----------|----------|----------|-------------|
| GO_BP_m1GO:001071regulation    | 8/2606  | 85/23843  | 0.723992 | 0.838658 | 0.797473 | Foxa2/Foxc  |
| GO_BP_m1GO:00341Cerythrocyte   | 13/2606 | 135/23843 | 0.726235 | 0.841146 | 0.799838 | Bpgm/Jak3   |
| GO_BP_m1GO:00022CT cell differ | 6/2606  | 65/23843  | 0.727883 | 0.842721 | 0.801336 | Gpr183/Ifn  |
| GO_BP_m1GO:00105Cnegative re   | 6/2606  | 65/23843  | 0.727883 | 0.842721 | 0.801336 | Dapl1/Mt3   |
| GO_BP_m1GO:00422Cnatural kill  | 6/2606  | 65/23843  | 0.727883 | 0.842721 | 0.801336 | Cadm1/Il12  |
| GO_BP_m1GO:003104gene silenc   | 15/2606 | 155/23843 | 0.729063 | 0.843976 | 0.80253  | Cnot10/Cn   |
| GO_BP_m1GO:000741axon guida    | 21/2606 | 214/23843 | 0.732009 | 0.846004 | 0.804458 | Arx/Cdk5/C  |
| GO_BP_m1GO:003527exocrine sy   | 5/2606  | 55/23843  | 0.732285 | 0.846004 | 0.804458 | Cdh1/Fgf7,  |
| GO_BP_m1GO:00001Cestablishm    | 2/2606  | 23/23843  | 0.733352 | 0.846004 | 0.804458 | Cenpa/Pafa  |
| GO_BP_m1GO:00031Eatrioventric  | 2/2606  | 23/23843  | 0.733352 | 0.846004 | 0.804458 | Smad6/Zfp   |
| GO_BP_m1GO:000341endochonc     | 2/2606  | 23/23843  | 0.733352 | 0.846004 | 0.804458 | Poc1a/Por   |
| GO_BP_m1GO:000821glucocortic   | 2/2606  | 23/23843  | 0.733352 | 0.846004 | 0.804458 | Dgkq/Hsd1   |
| GO_BP_m1GO:00094Ctoxin metal   | 2/2606  | 23/23843  | 0.733352 | 0.846004 | 0.804458 | As3mt/Fmc   |
| GO_BP_m1GO:003014sphingolipi   | 2/2606  | 23/23843  | 0.733352 | 0.846004 | 0.804458 | Asah2/Smg   |
| GO_BP_m1GO:00319Epositive re   | 2/2606  | 23/23843  | 0.733352 | 0.846004 | 0.804458 | Gpnmb/Pd    |
| GO_BP_m1GO:00326Cnegative re   | 2/2606  | 23/23843  | 0.733352 | 0.846004 | 0.804458 | Mefv/Zc3h   |
| GO_BP_m1GO:00354Chistone-se    | 2/2606  | 23/23843  | 0.733352 | 0.846004 | 0.804458 | Gm14147/I   |
| GO_BP_m1GO:004204fluid trans   | 2/2606  | 23/23843  | 0.733352 | 0.846004 | 0.804458 | Ednrbl/Myll |
| GO_BP_m1GO:00443Eglucose im    | 2/2606  | 23/23843  | 0.733352 | 0.846004 | 0.804458 | Osblp8/Pal  |
| GO_BP_m1GO:00482Cbehavioral    | 2/2606  | 23/23843  | 0.733352 | 0.846004 | 0.804458 | Grin2b/Htr  |
| GO_BP_m1GO:00483Cmesoderm      | 2/2606  | 23/23843  | 0.733352 | 0.846004 | 0.804458 | Kdm6b/Wr    |
| GO_BP_m1GO:00512Cprotein ins   | 2/2606  | 23/23843  | 0.733352 | 0.846004 | 0.804458 | Reep1/Wrk   |
| GO_BP_m1GO:006004regulation    | 2/2606  | 23/23843  | 0.733352 | 0.846004 | 0.804458 | Hyal3/Pkdr  |
| GO_BP_m1GO:006014positive re   | 2/2606  | 23/23843  | 0.733352 | 0.846004 | 0.804458 | Fmr1/Nfkb   |
| GO_BP_m1GO:00701Cestablishm    | 2/2606  | 23/23843  | 0.733352 | 0.846004 | 0.804458 | H2afy/Nab   |
| GO_BP_m1GO:00714Ccellular res  | 2/2606  | 23/23843  | 0.733352 | 0.846004 | 0.804458 | Hvcn1/Slc9  |
| GO_BP_m1GO:008971amino acid    | 2/2606  | 23/23843  | 0.733352 | 0.846004 | 0.804458 | Arl6ip5/AU  |
| GO_BP_m1GO:00971Eneuroanal st  | 2/2606  | 23/23843  | 0.733352 | 0.846004 | 0.804458 | Cdh2/Sox2   |
| GO_BP_m1GO:19026Cnegative re   | 2/2606  | 23/23843  | 0.733352 | 0.846004 | 0.804458 | Sema3f/Wr   |
| GO_BP_m1GO:00061Cpurine nuc    | 3/2606  | 34/23843  | 0.73409  | 0.846004 | 0.804458 | Nudt1/Pde   |
| GO_BP_m1GO:00082CC21-steroi    | 3/2606  | 34/23843  | 0.73409  | 0.846004 | 0.804458 | Akr1c12/D   |
| GO_BP_m1GO:001907viral releas  | 3/2606  | 34/23843  | 0.73409  | 0.846004 | 0.804458 | Pcx/Trim31  |
| GO_BP_m1GO:00327Cpositive re   | 3/2606  | 34/23843  | 0.73409  | 0.846004 | 0.804458 | Cd36/Ifng/  |
| GO_BP_m1GO:003424regulation    | 3/2606  | 34/23843  | 0.73409  | 0.846004 | 0.804458 | Btbd18/Ell2 |
| GO_BP_m1GO:00358Cexit from h   | 3/2606  | 34/23843  | 0.73409  | 0.846004 | 0.804458 | Pcx/Trim31  |
| GO_BP_m1GO:00358Cexit from h   | 3/2606  | 34/23843  | 0.73409  | 0.846004 | 0.804458 | Pcx/Trim31  |
| GO_BP_m1GO:00424Eribonucleo    | 3/2606  | 34/23843  | 0.73409  | 0.846004 | 0.804458 | Adk/Aprt/I  |
| GO_BP_m1GO:005091negative cl   | 3/2606  | 34/23843  | 0.73409  | 0.846004 | 0.804458 | Nrg1/Pdgf   |
| GO_BP_m1GO:005212movement      | 3/2606  | 34/23843  | 0.73409  | 0.846004 | 0.804458 | Pcx/Trim31  |
| GO_BP_m1GO:00521Cmovement      | 3/2606  | 34/23843  | 0.73409  | 0.846004 | 0.804458 | Pcx/Trim31  |
| GO_BP_m1GO:00149Cmyotube d     | 11/2606 | 116/23843 | 0.734655 | 0.846545 | 0.804973 | Acta1/Cav3  |
| GO_BP_m1GO:00486Cpositive re   | 9/2606  | 96/23843  | 0.734976 | 0.846803 | 0.805218 | Alox12/My   |
| GO_BP_m1GO:002261gland mor     | 14/2606 | 146/23843 | 0.736885 | 0.84878  | 0.807098 | Cav1/Cav3   |
| GO_BP_m1GO:00301EB cell differ | 14/2606 | 146/23843 | 0.736885 | 0.84878  | 0.807098 | Cmtm7/Dc    |
| GO_BP_m1GO:00019Cregulation    | 4/2606  | 45/23843  | 0.739639 | 0.850837 | 0.809053 | Avpr1a/Co   |
| GO_BP_m1GO:000271positive re   | 4/2606  | 45/23843  | 0.739639 | 0.850837 | 0.809053 | Ifng/Ptprc/ |
| GO_BP_m1GO:00028Cpositive re   | 4/2606  | 45/23843  | 0.739639 | 0.850837 | 0.809053 | Ifng/Ptprc/ |
| GO_BP_m1GO:000657cellular bio  | 4/2606  | 45/23843  | 0.739639 | 0.850837 | 0.809053 | Agmat/Hdc   |

|                   |               |         |           |          |          |          |             |
|-------------------|---------------|---------|-----------|----------|----------|----------|-------------|
| GO_BP_m1GO:001046 | regulation    | 4/2606  | 45/23843  | 0.739639 | 0.850837 | 0.809053 | Myc/Pdgfa   |
| GO_BP_m1GO:001071 | positive re   | 4/2606  | 45/23843  | 0.739639 | 0.850837 | 0.809053 | Foxc1/Gcni  |
| GO_BP_m1GO:003278 | regulation    | 4/2606  | 45/23843  | 0.739639 | 0.850837 | 0.809053 | Btbd18/Ell2 |
| GO_BP_m1GO:006041 | ventricular   | 4/2606  | 45/23843  | 0.739639 | 0.850837 | 0.809053 | Nog/Smad    |
| GO_BP_m1GO:00713C | cellular res  | 4/2606  | 45/23843  | 0.739639 | 0.850837 | 0.809053 | Abl2/Adnp   |
| GO_BP_m1GO:009893 | axonal tran   | 4/2606  | 45/23843  | 0.739639 | 0.850837 | 0.809053 | Bloc1s5/Frn |
| GO_BP_m1GO:005085 | antigen rec   | 28/2606 | 283/23843 | 0.740093 | 0.851247 | 0.809444 | Bcar1/Btnl2 |
| GO_BP_m1GO:00019C | leukocyte r   | 10/2606 | 107/23843 | 0.745209 | 0.852417 | 0.810556 | Arg1/Cadn   |
| GO_BP_m1GO:000828 | insulin rec   | 10/2606 | 107/23843 | 0.745209 | 0.852417 | 0.810556 | Appl1/Bcar  |
| GO_BP_m1GO:005102 | mRNA tran     | 10/2606 | 107/23843 | 0.745209 | 0.852417 | 0.810556 | Ahctf1/Dd   |
| GO_BP_m1GO:003133 | negative re   | 13/2606 | 137/23843 | 0.745326 | 0.852417 | 0.810556 | Cfl1/Gsn/K  |
| GO_BP_m1GO:19029C | negative re   | 13/2606 | 137/23843 | 0.745326 | 0.852417 | 0.810556 | Cav3/Cfl1/I |
| GO_BP_m1GO:006133 | cardiac cor   | 5/2606  | 56/23843  | 0.746825 | 0.852417 | 0.810556 | Cacnb2/Ca   |
| GO_BP_m1GO:002187 | forebrain g   | 8/2606  | 87/23843  | 0.747774 | 0.852417 | 0.810556 | Arx/Dct/Mi  |
| GO_BP_m1GO:005145 | regulation    | 7/2606  | 77/23843  | 0.750446 | 0.852417 | 0.810556 | Atp6v0c/A   |
| GO_BP_m1GO:000096 | mitochond     | 1/2606  | 12/23843  | 0.750747 | 0.852417 | 0.810556 | Pnpt1       |
| GO_BP_m1GO:000201 | regulation    | 1/2606  | 12/23843  | 0.750747 | 0.852417 | 0.810556 | Drd3        |
| GO_BP_m1GO:000208 | protein de    | 1/2606  | 12/23843  | 0.750747 | 0.852417 | 0.810556 | Ppt1        |
| GO_BP_m1GO:000242 | natural kill  | 1/2606  | 12/23843  | 0.750747 | 0.852417 | 0.810556 | Il12b       |
| GO_BP_m1GO:000242 | natural kill  | 1/2606  | 12/23843  | 0.750747 | 0.852417 | 0.810556 | Il12b       |
| GO_BP_m1GO:000243 | compleme      | 1/2606  | 12/23843  | 0.750747 | 0.852417 | 0.810556 | Fpr2        |
| GO_BP_m1GO:000285 | regulation    | 1/2606  | 12/23843  | 0.750747 | 0.852417 | 0.810556 | Il12b       |
| GO_BP_m1GO:000285 | regulation    | 1/2606  | 12/23843  | 0.750747 | 0.852417 | 0.810556 | Il12b       |
| GO_BP_m1GO:000312 | heart field   | 1/2606  | 12/23843  | 0.750747 | 0.852417 | 0.810556 | Wnt3a       |
| GO_BP_m1GO:000341 | chondrocyt    | 1/2606  | 12/23843  | 0.750747 | 0.852417 | 0.810556 | Poc1a       |
| GO_BP_m1GO:000602 | inositol me   | 1/2606  | 12/23843  | 0.750747 | 0.852417 | 0.810556 | Slc5a3      |
| GO_BP_m1GO:000911 | vitamin cat   | 1/2606  | 12/23843  | 0.750747 | 0.852417 | 0.810556 | Crabp1      |
| GO_BP_m1GO:00092C | pyrimidine    | 1/2606  | 12/23843  | 0.750747 | 0.852417 | 0.810556 | Nme6        |
| GO_BP_m1GO:000921 | pyrimidine    | 1/2606  | 12/23843  | 0.750747 | 0.852417 | 0.810556 | Shmt1       |
| GO_BP_m1GO:001031 | regulation    | 1/2606  | 12/23843  | 0.750747 | 0.852417 | 0.810556 | Snca        |
| GO_BP_m1GO:001045 | centriole-c   | 1/2606  | 12/23843  | 0.750747 | 0.852417 | 0.810556 | Odf2        |
| GO_BP_m1GO:001081 | regulation    | 1/2606  | 12/23843  | 0.750747 | 0.852417 | 0.810556 | Cxcl10      |
| GO_BP_m1GO:001474 | negative re   | 1/2606  | 12/23843  | 0.750747 | 0.852417 | 0.810556 | Atp2b4      |
| GO_BP_m1GO:001484 | skeletal mu   | 1/2606  | 12/23843  | 0.750747 | 0.852417 | 0.810556 | Ephb1       |
| GO_BP_m1GO:001484 | urinary trac  | 1/2606  | 12/23843  | 0.750747 | 0.852417 | 0.810556 | Htr7        |
| GO_BP_m1GO:001644 | somatic hy    | 1/2606  | 12/23843  | 0.750747 | 0.852417 | 0.810556 | Ung         |
| GO_BP_m1GO:001692 | protein de    | 1/2606  | 12/23843  | 0.750747 | 0.852417 | 0.810556 | Senp1       |
| GO_BP_m1GO:001815 | protein oxi   | 1/2606  | 12/23843  | 0.750747 | 0.852417 | 0.810556 | Gpx1        |
| GO_BP_m1GO:001834 | protein pre   | 1/2606  | 12/23843  | 0.750747 | 0.852417 | 0.810556 | Fnta        |
| GO_BP_m1GO:002152 | ventral spir  | 1/2606  | 12/23843  | 0.750747 | 0.852417 | 0.810556 | Dbx1        |
| GO_BP_m1GO:002167 | lateral vent  | 1/2606  | 12/23843  | 0.750747 | 0.852417 | 0.810556 | Kdm2b       |
| GO_BP_m1GO:003029 | intestinal cl | 1/2606  | 12/23843  | 0.750747 | 0.852417 | 0.810556 | Cd36        |
| GO_BP_m1GO:003043 | peristalsis   | 1/2606  | 12/23843  | 0.750747 | 0.852417 | 0.810556 | Gdnf        |
| GO_BP_m1GO:003083 | positive re   | 1/2606  | 12/23843  | 0.750747 | 0.852417 | 0.810556 | Cfl1        |
| GO_BP_m1GO:003227 | luteinizing   | 1/2606  | 12/23843  | 0.750747 | 0.852417 | 0.810556 | Tacr2       |
| GO_BP_m1GO:003235 | negative re   | 1/2606  | 12/23843  | 0.750747 | 0.852417 | 0.810556 | Nfkb1       |
| GO_BP_m1GO:003272 | positive re   | 1/2606  | 12/23843  | 0.750747 | 0.852417 | 0.810556 | Il12b       |
| GO_BP_m1GO:003275 | positive re   | 1/2606  | 12/23843  | 0.750747 | 0.852417 | 0.810556 | Il1r1       |



|                   |              |        |          |          |          |          |          |
|-------------------|--------------|--------|----------|----------|----------|----------|----------|
| GO_BP_m1GO:003314 | positive re  | 1/2606 | 12/23843 | 0.750747 | 0.852417 | 0.810556 | Pak1     |
| GO_BP_m1GO:003324 | positive re  | 1/2606 | 12/23843 | 0.750747 | 0.852417 | 0.810556 | Abat     |
| GO_BP_m1GO:003386 | nucleoside   | 1/2606 | 12/23843 | 0.750747 | 0.852417 | 0.810556 | Dcakd    |
| GO_BP_m1GO:003403 | ribonucleo   | 1/2606 | 12/23843 | 0.750747 | 0.852417 | 0.810556 | Dcakd    |
| GO_BP_m1GO:003403 | purine nuc   | 1/2606 | 12/23843 | 0.750747 | 0.852417 | 0.810556 | Dcakd    |
| GO_BP_m1GO:003424 | negative re  | 1/2606 | 12/23843 | 0.750747 | 0.852417 | 0.810556 | Nelfb    |
| GO_BP_m1GO:003498 | mitochond    | 1/2606 | 12/23843 | 0.750747 | 0.852417 | 0.810556 | Uqrcr2   |
| GO_BP_m1GO:003509 | maintenan    | 1/2606 | 12/23843 | 0.750747 | 0.852417 | 0.810556 | Lrrd1    |
| GO_BP_m1GO:003597 | peptidyl-tr  | 1/2606 | 12/23843 | 0.750747 | 0.852417 | 0.810556 | Dusp5    |
| GO_BP_m1GO:003629 | cellular res | 1/2606 | 12/23843 | 0.750747 | 0.852417 | 0.810556 | Cav1     |
| GO_BP_m1GO:003631 | cellular res | 1/2606 | 12/23843 | 0.750747 | 0.852417 | 0.810556 | Smo      |
| GO_BP_m1GO:004203 | chemokine    | 1/2606 | 12/23843 | 0.750747 | 0.852417 | 0.810556 | lfng     |
| GO_BP_m1GO:004365 | engulfmen    | 1/2606 | 12/23843 | 0.750747 | 0.852417 | 0.810556 | Rac3     |
| GO_BP_m1GO:004397 | histone H3   | 1/2606 | 12/23843 | 0.750747 | 0.852417 | 0.810556 | Kat2b    |
| GO_BP_m1GO:004409 | positive re  | 1/2606 | 12/23843 | 0.750747 | 0.852417 | 0.810556 | Anxa2    |
| GO_BP_m1GO:004507 | regulation   | 1/2606 | 12/23843 | 0.750747 | 0.852417 | 0.810556 | lfng     |
| GO_BP_m1GO:004532 | late endosc  | 1/2606 | 12/23843 | 0.750747 | 0.852417 | 0.810556 | Pik3r4   |
| GO_BP_m1GO:004562 | regulation   | 1/2606 | 12/23843 | 0.750747 | 0.852417 | 0.810556 | Jak3     |
| GO_BP_m1GO:004574 | positive re  | 1/2606 | 12/23843 | 0.750747 | 0.852417 | 0.810556 | Adora1   |
| GO_BP_m1GO:004632 | negative re  | 1/2606 | 12/23843 | 0.750747 | 0.852417 | 0.810556 | Plin5    |
| GO_BP_m1GO:004685 | inositol ph  | 1/2606 | 12/23843 | 0.750747 | 0.852417 | 0.810556 | Synj1    |
| GO_BP_m1GO:004873 | sebaceous    | 1/2606 | 12/23843 | 0.750747 | 0.852417 | 0.810556 | Wnt10a   |
| GO_BP_m1GO:004873 | cardiac mu   | 1/2606 | 12/23843 | 0.750747 | 0.852417 | 0.810556 | Mypn     |
| GO_BP_m1GO:005102 | positive re  | 1/2606 | 12/23843 | 0.750747 | 0.852417 | 0.810556 | Stx4a    |
| GO_BP_m1GO:005128 | negative re  | 1/2606 | 12/23843 | 0.750747 | 0.852417 | 0.810556 | Fkbp1b   |
| GO_BP_m1GO:005197 | negative re  | 1/2606 | 12/23843 | 0.750747 | 0.852417 | 0.810556 | Men1     |
| GO_BP_m1GO:005198 | regulation   | 1/2606 | 12/23843 | 0.750747 | 0.852417 | 0.810556 | Racgap1  |
| GO_BP_m1GO:006043 | lung saccul  | 1/2606 | 12/23843 | 0.750747 | 0.852417 | 0.810556 | Asx1     |
| GO_BP_m1GO:006043 | bronchus c   | 1/2606 | 12/23843 | 0.750747 | 0.852417 | 0.810556 | Tulp3    |
| GO_BP_m1GO:006045 | regulation   | 1/2606 | 12/23843 | 0.750747 | 0.852417 | 0.810556 | Oprl1    |
| GO_BP_m1GO:006050 | epithelial c | 1/2606 | 12/23843 | 0.750747 | 0.852417 | 0.810556 | Fgf7     |
| GO_BP_m1GO:006057 | cell fate sp | 1/2606 | 12/23843 | 0.750747 | 0.852417 | 0.810556 | Dbx1     |
| GO_BP_m1GO:006076 | epithelial c | 1/2606 | 12/23843 | 0.750747 | 0.852417 | 0.810556 | Serpinf1 |
| GO_BP_m1GO:006105 | positive re  | 1/2606 | 12/23843 | 0.750747 | 0.852417 | 0.810556 | Akap6    |
| GO_BP_m1GO:007026 | peptidyl-sc  | 1/2606 | 12/23843 | 0.750747 | 0.852417 | 0.810556 | Ppp2r1a  |
| GO_BP_m1GO:007036 | hepatocyte   | 1/2606 | 12/23843 | 0.750747 | 0.852417 | 0.810556 | E2f7     |
| GO_BP_m1GO:007057 | positive re  | 1/2606 | 12/23843 | 0.750747 | 0.852417 | 0.810556 | Fkbp1b   |
| GO_BP_m1GO:007128 | cellular res | 1/2606 | 12/23843 | 0.750747 | 0.852417 | 0.810556 | Slc40a1  |
| GO_BP_m1GO:007128 | cellular res | 1/2606 | 12/23843 | 0.750747 | 0.852417 | 0.810556 | Cdh1     |
| GO_BP_m1GO:007129 | cellular res | 1/2606 | 12/23843 | 0.750747 | 0.852417 | 0.810556 | Kank2    |
| GO_BP_m1GO:007146 | cellular res | 1/2606 | 12/23843 | 0.750747 | 0.852417 | 0.810556 | Slc9a1   |
| GO_BP_m1GO:009019 | positive re  | 1/2606 | 12/23843 | 0.750747 | 0.852417 | 0.810556 | Nog      |
| GO_BP_m1GO:009720 | negative re  | 1/2606 | 12/23843 | 0.750747 | 0.852417 | 0.810556 | Nck2     |
| GO_BP_m1GO:009735 | prenylator   | 1/2606 | 12/23843 | 0.750747 | 0.852417 | 0.810556 | Fnta     |
| GO_BP_m1GO:190042 | positive re  | 1/2606 | 12/23843 | 0.750747 | 0.852417 | 0.810556 | Rab34    |
| GO_BP_m1GO:190155 | regulation   | 1/2606 | 12/23843 | 0.750747 | 0.852417 | 0.810556 | Tnfrsf1a |
| GO_BP_m1GO:190241 | protein loc  | 1/2606 | 12/23843 | 0.750747 | 0.852417 | 0.810556 | Nectin3  |
| GO_BP_m1GO:190290 | negative re  | 1/2606 | 12/23843 | 0.750747 | 0.852417 | 0.810556 | Scfd1    |

|                                       |           |          |          |          |             |
|---------------------------------------|-----------|----------|----------|----------|-------------|
| GO_BP_m1GO:190314regulation 1/2606    | 12/23843  | 0.750747 | 0.852417 | 0.810556 | Tnfrsf1a    |
| GO_BP_m1GO:190429negative re1/2606    | 12/23843  | 0.750747 | 0.852417 | 0.810556 | Usp14       |
| GO_BP_m1GO:190499regulation 1/2606    | 12/23843  | 0.750747 | 0.852417 | 0.810556 | Ccl28       |
| GO_BP_m1GO:190551positive reç1/2606   | 12/23843  | 0.750747 | 0.852417 | 0.810556 | Hyal3       |
| GO_BP_m1GO:200031regulation 1/2606    | 12/23843  | 0.750747 | 0.852417 | 0.810556 | Smad7       |
| GO_BP_m1GO:200034regulation 1/2606    | 12/23843  | 0.750747 | 0.852417 | 0.810556 | Hdac1       |
| GO_BP_m1GO:000292regulation 3/2606    | 35/23843  | 0.752138 | 0.852417 | 0.810556 | Ptpcr/Spns  |
| GO_BP_m1GO:000965response tr3/2606    | 35/23843  | 0.752138 | 0.852417 | 0.810556 | Mir7b/Mir9  |
| GO_BP_m1GO:003142keratinizati 3/2606  | 35/23843  | 0.752138 | 0.852417 | 0.810556 | Abca12/Sh   |
| GO_BP_m1GO:00320C positive reç3/2606  | 35/23843  | 0.752138 | 0.852417 | 0.810556 | Fln/Htr6/V  |
| GO_BP_m1GO:00322C negative re3/2606   | 35/23843  | 0.752138 | 0.852417 | 0.810556 | Hnrnpc/Tn   |
| GO_BP_m1GO:003647cell death i 3/2606  | 35/23843  | 0.752138 | 0.852417 | 0.810556 | Endog/Hsp   |
| GO_BP_m1GO:00423C regulation 3/2606   | 35/23843  | 0.752138 | 0.852417 | 0.810556 | Avpr1a/Nr.  |
| GO_BP_m1GO:004304ATP-deper3/2606      | 35/23843  | 0.752138 | 0.852417 | 0.810556 | Psme4/Sm.   |
| GO_BP_m1GO:004663negative re3/2606    | 35/23843  | 0.752138 | 0.852417 | 0.810556 | Jak3/Smad   |
| GO_BP_m1GO:00466E response tr3/2606   | 35/23843  | 0.752138 | 0.852417 | 0.810556 | Gsn/Mt2/M   |
| GO_BP_m1GO:00480C insulin-like 3/2606 | 35/23843  | 0.752138 | 0.852417 | 0.810556 | Gigyf2/Ift8 |
| GO_BP_m1GO:00516E actin filameç3/2606 | 35/23843  | 0.752138 | 0.852417 | 0.810556 | Cfl1/Gsn/T  |
| GO_BP_m1GO:006007Wnt signali3/2606    | 35/23843  | 0.752138 | 0.852417 | 0.810556 | Abl2/Cthrc  |
| GO_BP_m1GO:006044epithelial ti3/2606  | 35/23843  | 0.752138 | 0.852417 | 0.810556 | Foxa2/Pdg   |
| GO_BP_m1GO:20007E regulation 3/2606   | 35/23843  | 0.752138 | 0.852417 | 0.810556 | Ift88/Scfd1 |
| GO_BP_m1GO:20010E regulation 3/2606   | 35/23843  | 0.752138 | 0.852417 | 0.810556 | Endog/Hsp   |
| GO_BP_m1GO:004211B cell activç40/2606 | 401/23843 | 0.754342 | 0.852417 | 0.810556 | Aplf/Cdkn1  |
| GO_BP_m1GO:001082positive reç13/2606  | 138/23843 | 0.754535 | 0.852417 | 0.810556 | Arih2/Bnip  |
| GO_BP_m1GO:000222natural killç6/2606  | 67/23843  | 0.754553 | 0.852417 | 0.810556 | Cadm1/Il12  |
| GO_BP_m1GO:003032respiratory 21/2606  | 217/23843 | 0.754583 | 0.852417 | 0.810556 | Abca12/As   |
| GO_BP_m1GO:005114regulation 14/2606   | 148/23843 | 0.75488  | 0.852417 | 0.810556 | Akap6/Cav   |
| GO_BP_m1GO:000182trophectod2/2606     | 24/23843  | 0.75489  | 0.852417 | 0.810556 | Cdh1/Esrrb  |
| GO_BP_m1GO:000241immune re 2/2606     | 24/23843  | 0.75489  | 0.852417 | 0.810556 | Il12b/Ulbp  |
| GO_BP_m1GO:00030E negative re2/2606   | 24/23843  | 0.75489  | 0.852417 | 0.810556 | Adra1d/Cd   |
| GO_BP_m1GO:000622pyrimidine 2/2606    | 24/23843  | 0.75489  | 0.852417 | 0.810556 | Nme6/Shr    |
| GO_BP_m1GO:001057positive reç2/2606   | 24/23843  | 0.75489  | 0.852417 | 0.810556 | Cxcl17/Ptg  |
| GO_BP_m1GO:001943triglyceride2/2606   | 24/23843  | 0.75489  | 0.852417 | 0.810556 | Plin5/Pnpl  |
| GO_BP_m1GO:00218C cerebral co2/2606   | 24/23843  | 0.75489  | 0.852417 | 0.810556 | Cdk5/Pafaf  |
| GO_BP_m1GO:002203telencepha2/2606     | 24/23843  | 0.75489  | 0.852417 | 0.810556 | Cdk5/Pafaf  |
| GO_BP_m1GO:00302C heparan su2/2606    | 24/23843  | 0.75489  | 0.852417 | 0.810556 | Extl3/Hs6st |
| GO_BP_m1GO:00310E negative re2/2606   | 24/23843  | 0.75489  | 0.852417 | 0.810556 | H2afy/Prm   |
| GO_BP_m1GO:00311C animal org 2/2606   | 24/23843  | 0.75489  | 0.852417 | 0.810556 | Cdk1/Ezh1   |
| GO_BP_m1GO:00324E endoplasm2/2606     | 24/23843  | 0.75489  | 0.852417 | 0.810556 | Bcap31/Ra   |
| GO_BP_m1GO:003352histone H2 2/2606    | 24/23843  | 0.75489  | 0.852417 | 0.810556 | Kdm2b/Rin   |
| GO_BP_m1GO:00336E regulation 2/2606   | 24/23843  | 0.75489  | 0.852417 | 0.810556 | Cthrc1/Eif2 |
| GO_BP_m1GO:00340E protein loc 2/2606  | 24/23843  | 0.75489  | 0.852417 | 0.810556 | Cog7/Gbf1   |
| GO_BP_m1GO:00420E negative re2/2606   | 24/23843  | 0.75489  | 0.852417 | 0.810556 | Gprc5a/Ptç  |
| GO_BP_m1GO:00435E regulation 2/2606   | 24/23843  | 0.75489  | 0.852417 | 0.810556 | Ift88/Igfbp |
| GO_BP_m1GO:004572positive reç2/2606   | 24/23843  | 0.75489  | 0.852417 | 0.810556 | Saxo1/Tme   |
| GO_BP_m1GO:00468E phosphatic2/2606    | 24/23843  | 0.75489  | 0.852417 | 0.810556 | Synj1/Tme   |
| GO_BP_m1GO:004802negative re2/2606    | 24/23843  | 0.75489  | 0.852417 | 0.810556 | Rbm42/Srs   |
| GO_BP_m1GO:00517E response tr2/2606   | 24/23843  | 0.75489  | 0.852417 | 0.810556 | Ufd1/Uggt   |

|                                       |           |          |          |          |              |
|---------------------------------------|-----------|----------|----------|----------|--------------|
| GO_BP_m1GO:006021definitive h2/2606   | 24/23843  | 0.75489  | 0.852417 | 0.810556 | Bcr/Senp1    |
| GO_BP_m1GO:007058mitochondr2/2606     | 24/23843  | 0.75489  | 0.852417 | 0.810556 | Myh14/Pnq    |
| GO_BP_m1GO:009858detection c2/2606    | 24/23843  | 0.75489  | 0.852417 | 0.810556 | Nod1/Scar    |
| GO_BP_m1GO:012003negative re2/2606    | 24/23843  | 0.75489  | 0.852417 | 0.810556 | Cfl1/Plxnb3  |
| GO_BP_m1GO:190173regulation 2/2606    | 24/23843  | 0.75489  | 0.852417 | 0.810556 | Cxcl10/Scg   |
| GO_BP_m1GO:000209regulation 4/2606    | 46/23843  | 0.755322 | 0.852576 | 0.810708 | Cd63/Fmr1    |
| GO_BP_m1GO:000317heart valve 4/2606   | 46/23843  | 0.755322 | 0.852576 | 0.810708 | Adamts9/Ja   |
| GO_BP_m1GO:002260ovulation c4/2606    | 46/23843  | 0.755322 | 0.852576 | 0.810708 | Adamts1/A    |
| GO_BP_m1GO:001092cellular cor10/2606  | 108/23843 | 0.755556 | 0.852735 | 0.810858 | Acta1/Ahn    |
| GO_BP_m1GO:000170formation c9/2606    | 98/23843  | 0.756937 | 0.85407  | 0.812128 | Col5a1/Du    |
| GO_BP_m1GO:003223regulation 9/2606    | 98/23843  | 0.756937 | 0.85407  | 0.812128 | Cfl1/Ctgf/It |
| GO_BP_m1GO:005076regulation 8/2606    | 88/23843  | 0.759114 | 0.856416 | 0.814359 | Bcr/Calr/Cc  |
| GO_BP_m1GO:005130establishm7/2606     | 78/23843  | 0.762375 | 0.859874 | 0.817647 | Ankrd53/Tc   |
| GO_BP_m1GO:007061regulation 7/2606    | 78/23843  | 0.762375 | 0.859874 | 0.817647 | Cdh1/Fmr1    |
| GO_BP_m1GO:004255myelinatio13/2606    | 139/23843 | 0.763517 | 0.861052 | 0.818767 | Ahnak2/Cc    |
| GO_BP_m1GO:005083defense re12/2606    | 129/23843 | 0.763787 | 0.861109 | 0.818822 | 1700016DC    |
| GO_BP_m1GO:000703vacuole or15/2606    | 159/23843 | 0.763862 | 0.861109 | 0.818822 | Anxa2/Atg    |
| GO_BP_m1GO:190165response tr15/2606   | 159/23843 | 0.763862 | 0.861109 | 0.818822 | Adh1/Cav1    |
| GO_BP_m1GO:000189placenta de16/2606   | 169/23843 | 0.764369 | 0.86157  | 0.819259 | Adm/Cdh1     |
| GO_BP_m1GO:012003positive re9/2606    | 99/23843  | 0.767427 | 0.862006 | 0.819675 | Bcas3/Cdc    |
| GO_BP_m1GO:000838RNA splicir36/2606   | 365/23843 | 0.768289 | 0.862006 | 0.819675 | Virma/Rtra   |
| GO_BP_m1GO:000170gastrulatio13/2606   | 36/23843  | 0.769187 | 0.862006 | 0.819675 | Nat8f3/Fox   |
| GO_BP_m1GO:000916nucleoside 3/2606    | 36/23843  | 0.769187 | 0.862006 | 0.819675 | Adk/Aprt/N   |
| GO_BP_m1GO:000931oligosacchi3/2606    | 36/23843  | 0.769187 | 0.862006 | 0.819675 | Galnt9/St6   |
| GO_BP_m1GO:001025multicellul3/2606    | 36/23843  | 0.769187 | 0.862006 | 0.819675 | Ercc5/Hyal   |
| GO_BP_m1GO:002179cerebral co3/2606    | 36/23843  | 0.769187 | 0.862006 | 0.819675 | Cdk5/Pafaf   |
| GO_BP_m1GO:003106positive re3/2606    | 36/23843  | 0.769187 | 0.862006 | 0.819675 | Dmrtc2/Mc    |
| GO_BP_m1GO:003245endocytic r3/2606    | 36/23843  | 0.769187 | 0.862006 | 0.819675 | Epg5/Ndrg    |
| GO_BP_m1GO:003530positive re3/2606    | 36/23843  | 0.769187 | 0.862006 | 0.819675 | Adora1/Ak    |
| GO_BP_m1GO:005129establishm3/2606     | 36/23843  | 0.769187 | 0.862006 | 0.819675 | Cenpa/Nus    |
| GO_BP_m1GO:006025regulation 3/2606    | 36/23843  | 0.769187 | 0.862006 | 0.819675 | Dgat1/Htr1   |
| GO_BP_m1GO:007139cellular res3/2606   | 36/23843  | 0.769187 | 0.862006 | 0.819675 | Bcas3/Crhc   |
| GO_BP_m1GO:007151genetic im3/2606     | 36/23843  | 0.769187 | 0.862006 | 0.819675 | Cdkn1c/H1    |
| GO_BP_m1GO:190222regulation 3/2606    | 36/23843  | 0.769187 | 0.862006 | 0.819675 | Fbxo18/Pg    |
| GO_BP_m1GO:005507iron ion ho8/2606    | 89/23843  | 0.770086 | 0.862006 | 0.819675 | Bdh2/Eif2a   |
| GO_BP_m1GO:000636transcripti4/2606    | 47/23843  | 0.770265 | 0.862006 | 0.819675 | Btbd18/Ell2  |
| GO_BP_m1GO:003233regulation 4/2606    | 47/23843  | 0.770265 | 0.862006 | 0.819675 | Ctgf/Rflna/  |
| GO_BP_m1GO:004562negative re4/2606    | 47/23843  | 0.770265 | 0.862006 | 0.819675 | Ctla4/Jak3/  |
| GO_BP_m1GO:190403negative re4/2606    | 47/23843  | 0.770265 | 0.862006 | 0.819675 | Abl2/Il10/S  |
| GO_BP_m1GO:003253regulation 38/2606   | 385/23843 | 0.771938 | 0.862006 | 0.819675 | Aatk/Cav3/   |
| GO_BP_m1GO:005000chromosor7/2606      | 79/23843  | 0.773884 | 0.862006 | 0.819675 | Ankrd53/Tc   |
| GO_BP_m1GO:003021T cell differ25/2606 | 259/23843 | 0.773941 | 0.862006 | 0.819675 | Abl2/Adam    |
| GO_BP_m1GO:000288regulation 5/2606    | 58/23843  | 0.774129 | 0.862006 | 0.819675 | Arg1/Bcr/It  |
| GO_BP_m1GO:000715heterophili5/2606    | 58/23843  | 0.774129 | 0.862006 | 0.819675 | Cadm1/Cd     |
| GO_BP_m1GO:003083negative re5/2606    | 58/23843  | 0.774129 | 0.862006 | 0.819675 | Cfl1/Gsn/K   |
| GO_BP_m1GO:004209T-helper c5/2606     | 58/23843  | 0.774129 | 0.862006 | 0.819675 | Gpr183/Il1   |
| GO_BP_m1GO:004828lung alveol5/2606    | 58/23843  | 0.774129 | 0.862006 | 0.819675 | Abca12/As    |
| GO_BP_m1GO:006044mammary 5/2606       | 58/23843  | 0.774129 | 0.862006 | 0.819675 | Cav1/Cav3    |

|                                       |           |          |          |          |             |
|---------------------------------------|-----------|----------|----------|----------|-------------|
| GO_BP_m1GO:19043Eregulation 5/2606    | 58/23843  | 0.774129 | 0.862006 | 0.819675 | Atr/Cct3/H  |
| GO_BP_m1GO:000307renal syste12/2606   | 25/23843  | 0.774907 | 0.862006 | 0.819675 | Adora1/Ut   |
| GO_BP_m1GO:000677porphyrin- 2/2606    | 25/23843  | 0.774907 | 0.862006 | 0.819675 | Cox15/IbaE  |
| GO_BP_m1GO:00301Epositive reç2/2606   | 25/23843  | 0.774907 | 0.862006 | 0.819675 | Cd36/Ptprj  |
| GO_BP_m1GO:003114SCF-deper2/2606      | 25/23843  | 0.774907 | 0.862006 | 0.819675 | Cul1/FbxoE  |
| GO_BP_m1GO:003134negative re2/2606    | 25/23843  | 0.774907 | 0.862006 | 0.819675 | Ptprc/Sh2d  |
| GO_BP_m1GO:00359Esteroid hor2/2606    | 25/23843  | 0.774907 | 0.862006 | 0.819675 | Galr1/Tac1  |
| GO_BP_m1GO:00424Eindole-con2/2606     | 25/23843  | 0.774907 | 0.862006 | 0.819675 | Gch1/Htr1E  |
| GO_BP_m1GO:00457Erespiratory 2/2606   | 25/23843  | 0.774907 | 0.862006 | 0.819675 | Bcr/Pgam1   |
| GO_BP_m1GO:004864negative re2/2606    | 25/23843  | 0.774907 | 0.862006 | 0.819675 | Ephb1/Ybx   |
| GO_BP_m1GO:00711Cprotein K4E2/2606    | 25/23843  | 0.774907 | 0.862006 | 0.819675 | Mindy2/Us   |
| GO_BP_m1GO:00860Cventricular 2/2606   | 25/23843  | 0.774907 | 0.862006 | 0.819675 | Cav1/Cav3   |
| GO_BP_m1GO:00988Ebone grow2/2606      | 25/23843  | 0.774907 | 0.862006 | 0.819675 | Poc1a/Por   |
| GO_BP_m1GO:190004positive reç2/2606   | 25/23843  | 0.774907 | 0.862006 | 0.819675 | Cd36/Ptprj  |
| GO_BP_m1GO:19010Enegative re2/2606    | 25/23843  | 0.774907 | 0.862006 | 0.819675 | Hsph1/Il10  |
| GO_BP_m1GO:19011Enegative re2/2606    | 25/23843  | 0.774907 | 0.862006 | 0.819675 | Gprc5a/Ptpr |
| GO_BP_m1GO:19032Cnegative re2/2606    | 25/23843  | 0.774907 | 0.862006 | 0.819675 | Hsph1/Il10  |
| GO_BP_m1GO:19038Eregulation 2/2606    | 25/23843  | 0.774907 | 0.862006 | 0.819675 | Cpne6/Parl  |
| GO_BP_m1GO:19043Enegative re2/2606    | 25/23843  | 0.774907 | 0.862006 | 0.819675 | Hnrnpc/Tn   |
| GO_BP_m1GO:20010Enegative re2/2606    | 25/23843  | 0.774907 | 0.862006 | 0.819675 | Hsph1/Il10  |
| GO_BP_m1GO:003051intracellula 10/2606 | 110/23843 | 0.77538  | 0.862006 | 0.819675 | Arntl/Calr/ |
| GO_BP_m1GO:000717epidermal 19/2606    | 100/23843 | 0.777592 | 0.862006 | 0.819675 | Abl2/Adora  |
| GO_BP_m1GO:000154ovulation fi1/2606   | 13/23843  | 0.778004 | 0.862006 | 0.819675 | Adamts1     |
| GO_BP_m1GO:00020E2diet induce1/2606   | 13/23843  | 0.778004 | 0.862006 | 0.819675 | Trpv4       |
| GO_BP_m1GO:00025Eçsomatic div1/2606   | 13/23843  | 0.778004 | 0.862006 | 0.819675 | Ung         |
| GO_BP_m1GO:000267negative re1/2606    | 13/23843  | 0.778004 | 0.862006 | 0.819675 | Adora1      |
| GO_BP_m1GO:00064Eçoligosacch1/2606    | 13/23843  | 0.778004 | 0.862006 | 0.819675 | Alg6        |
| GO_BP_m1GO:000651protein deç1/2606    | 13/23843  | 0.778004 | 0.862006 | 0.819675 | Man1b1      |
| GO_BP_m1GO:00071Cmitotic cen1/2606    | 13/23843  | 0.778004 | 0.862006 | 0.819675 | Ranbp1      |
| GO_BP_m1GO:00073Etripartite re1/2606  | 13/23843  | 0.778004 | 0.862006 | 0.819675 | Wt1         |
| GO_BP_m1GO:00075Cmesoderm.1/2606      | 13/23843  | 0.778004 | 0.862006 | 0.819675 | Wnt3a       |
| GO_BP_m1GO:00085Eçanterior/pc1/2606   | 13/23843  | 0.778004 | 0.862006 | 0.819675 | Wt1         |
| GO_BP_m1GO:00092E2nucleotide.1/2606   | 13/23843  | 0.778004 | 0.862006 | 0.819675 | Pgm3        |
| GO_BP_m1GO:00102E2response tr1/2606   | 13/23843  | 0.778004 | 0.862006 | 0.819675 | Cdh1        |
| GO_BP_m1GO:00105Enegative re1/2606    | 13/23843  | 0.778004 | 0.862006 | 0.819675 | Jak3        |
| GO_BP_m1GO:00193E2pentose m1/2606     | 13/23843  | 0.778004 | 0.862006 | 0.819675 | Rpe         |
| GO_BP_m1GO:00197Eone-carbo1/2606      | 13/23843  | 0.778004 | 0.862006 | 0.819675 | Slc14a2     |
| GO_BP_m1GO:00215E2spinal cord1/2606   | 13/23843  | 0.778004 | 0.862006 | 0.819675 | Hoxd10      |
| GO_BP_m1GO:002154pons devel1/2606     | 13/23843  | 0.778004 | 0.862006 | 0.819675 | Hoxb1       |
| GO_BP_m1GO:00216Eçcerebellar ç1/2606  | 13/23843  | 0.778004 | 0.862006 | 0.819675 | Wnt7a       |
| GO_BP_m1GO:00219E2cell prolifer1/2606 | 13/23843  | 0.778004 | 0.862006 | 0.819675 | Cend1       |
| GO_BP_m1GO:00219Eçcerebellar ç1/2606  | 13/23843  | 0.778004 | 0.862006 | 0.819675 | Cend1       |
| GO_BP_m1GO:003044regulation 1/2606    | 13/23843  | 0.778004 | 0.862006 | 0.819675 | Susd4       |
| GO_BP_m1GO:003057nuclear bo1/2606     | 13/23843  | 0.778004 | 0.862006 | 0.819675 | Srpk2       |
| GO_BP_m1GO:00310Eçmyosin fila1/2606   | 13/23843  | 0.778004 | 0.862006 | 0.819675 | Rap1gds1    |
| GO_BP_m1GO:00312E2auditory be1/2606   | 13/23843  | 0.778004 | 0.862006 | 0.819675 | Abl2        |
| GO_BP_m1GO:00312Eçpseudopoc1/2606     | 13/23843  | 0.778004 | 0.862006 | 0.819675 | Cdc42ep5    |
| GO_BP_m1GO:00320Eçbleb assem1/2606    | 13/23843  | 0.778004 | 0.862006 | 0.819675 | Prdx6       |

|                                      |          |          |          |          |           |
|--------------------------------------|----------|----------|----------|----------|-----------|
| GO_BP_m1GO:003227regulation 1/2606   | 13/23843 | 0.778004 | 0.862006 | 0.819675 | Tacr2     |
| GO_BP_m1GO:003235negative re1/2606   | 13/23843 | 0.778004 | 0.862006 | 0.819675 | Nfkb1     |
| GO_BP_m1GO:003245detection c1/2606   | 13/23843 | 0.778004 | 0.862006 | 0.819675 | Scarb1    |
| GO_BP_m1GO:003249response tr1/2606   | 13/23843 | 0.778004 | 0.862006 | 0.819675 | 5730559C1 |
| GO_BP_m1GO:003252somite rost1/2606   | 13/23843 | 0.778004 | 0.862006 | 0.819675 | Foxa2     |
| GO_BP_m1GO:003274positive re1/2606   | 13/23843 | 0.778004 | 0.862006 | 0.819675 | Il12b     |
| GO_BP_m1GO:003314negative re1/2606   | 13/23843 | 0.778004 | 0.862006 | 0.819675 | Kank2     |
| GO_BP_m1GO:003316histone H3 1/2606   | 13/23843 | 0.778004 | 0.862006 | 0.819675 | Kdm3b     |
| GO_BP_m1GO:003369positive re1/2606   | 13/23843 | 0.778004 | 0.862006 | 0.819675 | Cthrc1    |
| GO_BP_m1GO:003406stress gran 1/2606  | 13/23843 | 0.778004 | 0.862006 | 0.819675 | Ogfd1     |
| GO_BP_m1GO:003449protein loc 1/2606  | 13/23843 | 0.778004 | 0.862006 | 0.819675 | Wipi2     |
| GO_BP_m1GO:003574T-helper 2 1/2606   | 13/23843 | 0.778004 | 0.862006 | 0.819675 | Arg1      |
| GO_BP_m1GO:003629response tr1/2606   | 13/23843 | 0.778004 | 0.862006 | 0.819675 | Cav1      |
| GO_BP_m1GO:00397Cviral buddi1/2606   | 13/23843 | 0.778004 | 0.862006 | 0.819675 | Chmp1b    |
| GO_BP_m1GO:004222interleukin-1/2606  | 13/23843 | 0.778004 | 0.862006 | 0.819675 | Nod1      |
| GO_BP_m1GO:004257retinal met 1/2606  | 13/23843 | 0.778004 | 0.862006 | 0.819675 | Aldh1a3   |
| GO_BP_m1GO:004276very long-c1/2606   | 13/23843 | 0.778004 | 0.862006 | 0.819675 | Tecr      |
| GO_BP_m1GO:004297activation c1/2606  | 13/23843 | 0.778004 | 0.862006 | 0.819675 | Il12b     |
| GO_BP_m1GO:00435Cnegative re1/2606   | 13/23843 | 0.778004 | 0.862006 | 0.819675 | Ptpn22    |
| GO_BP_m1GO:004369reverse chc 1/2606  | 13/23843 | 0.778004 | 0.862006 | 0.819675 | Scarb1    |
| GO_BP_m1GO:004562regulation 1/2606   | 13/23843 | 0.778004 | 0.862006 | 0.819675 | Zfp35     |
| GO_BP_m1GO:004599positive re1/2606   | 13/23843 | 0.778004 | 0.862006 | 0.819675 | Uts2r     |
| GO_BP_m1GO:004603AMP metal1/2606     | 13/23843 | 0.778004 | 0.862006 | 0.819675 | Adss      |
| GO_BP_m1GO:004875branching 1/2606    | 13/23843 | 0.778004 | 0.862006 | 0.819675 | Epha7     |
| GO_BP_m1GO:005128positive re1/2606   | 13/23843 | 0.778004 | 0.862006 | 0.819675 | Fkbp1b    |
| GO_BP_m1GO:005131attachmen1/2606     | 13/23843 | 0.778004 | 0.862006 | 0.819675 | Cenpc1    |
| GO_BP_m1GO:005269cellular glu 1/2606 | 13/23843 | 0.778004 | 0.862006 | 0.819675 | Ugt1a9    |
| GO_BP_m1GO:006019prepulse in1/2606   | 13/23843 | 0.778004 | 0.862006 | 0.819675 | Drd3      |
| GO_BP_m1GO:006026regulation 1/2606   | 13/23843 | 0.778004 | 0.862006 | 0.819675 | Bcr       |
| GO_BP_m1GO:00606C lateral sprc1/2606 | 13/23843 | 0.778004 | 0.862006 | 0.819675 | Nog       |
| GO_BP_m1GO:006076negative re1/2606   | 13/23843 | 0.778004 | 0.862006 | 0.819675 | Hdac1     |
| GO_BP_m1GO:006096negative re1/2606   | 13/23843 | 0.778004 | 0.862006 | 0.819675 | Zc3h12a   |
| GO_BP_m1GO:006141regulation 1/2606   | 13/23843 | 0.778004 | 0.862006 | 0.819675 | Stox1     |
| GO_BP_m1GO:00701Cinterleukin-1/2606  | 13/23843 | 0.778004 | 0.862006 | 0.819675 | Gab1      |
| GO_BP_m1GO:007094neutrophil 1/2606   | 13/23843 | 0.778004 | 0.862006 | 0.819675 | Arg1      |
| GO_BP_m1GO:007102nuclear RN1/2606    | 13/23843 | 0.778004 | 0.862006 | 0.819675 | Exosc9    |
| GO_BP_m1GO:007102nuclear mR1/2606    | 13/23843 | 0.778004 | 0.862006 | 0.819675 | Exosc9    |
| GO_BP_m1GO:007149potassium 1/2606    | 13/23843 | 0.778004 | 0.862006 | 0.819675 | Kcnn4     |
| GO_BP_m1GO:007216nephron tu1/2606    | 13/23843 | 0.778004 | 0.862006 | 0.819675 | Osr1      |
| GO_BP_m1GO:007256chemokine 1/2606    | 13/23843 | 0.778004 | 0.862006 | 0.819675 | Hdac1     |
| GO_BP_m1GO:009008regulation 1/2606   | 13/23843 | 0.778004 | 0.862006 | 0.819675 | Zc3h12a   |
| GO_BP_m1GO:009012regulation 1/2606   | 13/23843 | 0.778004 | 0.862006 | 0.819675 | Cdc20     |
| GO_BP_m1GO:009871L-glutamat1/2606    | 13/23843 | 0.778004 | 0.862006 | 0.819675 | Arl6ip5   |
| GO_BP_m1GO:009873macromole1/2606     | 13/23843 | 0.778004 | 0.862006 | 0.819675 | Ppt1      |
| GO_BP_m1GO:009878mRNA clea1/2606     | 13/23843 | 0.778004 | 0.862006 | 0.819675 | Cpsf4     |
| GO_BP_m1GO:009891regulation 1/2606   | 13/23843 | 0.778004 | 0.862006 | 0.819675 | Cav1      |
| GO_BP_m1GO:009911tRNA 5'-er 1/2606   | 13/23843 | 0.778004 | 0.862006 | 0.819675 | Rpp40     |
| GO_BP_m1GO:190107glucosamir 1/2606   | 13/23843 | 0.778004 | 0.862006 | 0.819675 | Chil5     |

|                                        |           |          |          |          |             |
|----------------------------------------|-----------|----------|----------|----------|-------------|
| GO_BP_m1GO:190114insulin met 1/2606    | 13/23843  | 0.778004 | 0.862006 | 0.819675 | Cpz         |
| GO_BP_m1GO:190183regulation 1/2606     | 13/23843  | 0.778004 | 0.862006 | 0.819675 | H2afy       |
| GO_BP_m1GO:190233regulation 1/2606     | 13/23843  | 0.778004 | 0.862006 | 0.819675 | Foxc1       |
| GO_BP_m1GO:190285positive reg 1/2606   | 13/23843  | 0.778004 | 0.862006 | 0.819675 | Tmem67      |
| GO_BP_m1GO:190289negative re 1/2606    | 13/23843  | 0.778004 | 0.862006 | 0.819675 | Hdac2       |
| GO_BP_m1GO:190299positive reg 1/2606   | 13/23843  | 0.778004 | 0.862006 | 0.819675 | Csnk1e      |
| GO_BP_m1GO:190470negative re 1/2606    | 13/23843  | 0.778004 | 0.862006 | 0.819675 | Il10        |
| GO_BP_m1GO:190492positive reg 1/2606   | 13/23843  | 0.778004 | 0.862006 | 0.819675 | Park2       |
| GO_BP_m1GO:200121regulation 1/2606     | 13/23843  | 0.778004 | 0.862006 | 0.819675 | Adm         |
| GO_BP_m1GO:200122negative re 1/2606    | 13/23843  | 0.778004 | 0.862006 | 0.819675 | Nrg1        |
| GO_BP_m1GO:005081regulation 6/2606     | 69/23843  | 0.779261 | 0.863072 | 0.820688 | Dgkq/Fgf1   |
| GO_BP_m1GO:190199positive reg 6/2606   | 69/23843  | 0.779261 | 0.863072 | 0.820688 | Cdc7/Cdk1   |
| GO_BP_m1GO:200057positive reg 6/2606   | 69/23843  | 0.779261 | 0.863072 | 0.820688 | Atr/Cct3/H  |
| GO_BP_m1GO:003530negative re 8/2606    | 90/23843  | 0.780692 | 0.864549 | 0.822092 | Csrnp3/Fkt  |
| GO_BP_m1GO:007138cellular res 19/2606  | 201/23843 | 0.781291 | 0.865103 | 0.822619 | Arntl/Calr/ |
| GO_BP_m1GO:006156axon devel 49/2606    | 493/23843 | 0.781832 | 0.865593 | 0.823085 | Aatk/Ache/  |
| GO_BP_m1GO:001909reproductiv 4/2606    | 48/23843  | 0.784482 | 0.867753 | 0.825139 | Avpr1a/Drc  |
| GO_BP_m1GO:004249inner ear a 4/2606    | 48/23843  | 0.784482 | 0.867753 | 0.825139 | Jag1/Mcolr  |
| GO_BP_m1GO:004330regulation 4/2606     | 48/23843  | 0.784482 | 0.867753 | 0.825139 | Bcr/Itgam/  |
| GO_BP_m1GO:000227myeloid ce 7/2606     | 80/23843  | 0.784977 | 0.867753 | 0.825139 | Anxa3/Bcr/  |
| GO_BP_m1GO:000700plasma me 7/2606      | 80/23843  | 0.784977 | 0.867753 | 0.825139 | Ahnak2/Ca   |
| GO_BP_m1GO:190331regulation 7/2606     | 80/23843  | 0.784977 | 0.867753 | 0.825139 | Cdh1/Fmr1   |
| GO_BP_m1GO:000677porphyrin- 3/2606     | 37/23843  | 0.785265 | 0.867753 | 0.825139 | Cox15/Eif2  |
| GO_BP_m1GO:000808anterograd 3/2606     | 37/23843  | 0.785265 | 0.867753 | 0.825139 | Bloc1s5/Frn |
| GO_BP_m1GO:003050positive reg 3/2606   | 37/23843  | 0.785265 | 0.867753 | 0.825139 | Mia3/Osr1   |
| GO_BP_m1GO:003312positive reg 3/2606   | 37/23843  | 0.785265 | 0.867753 | 0.825139 | Hmx2/Prdx   |
| GO_BP_m1GO:004662negative re 3/2606    | 37/23843  | 0.785265 | 0.867753 | 0.825139 | Gpr21/Prkc  |
| GO_BP_m1GO:008606cell comm 3/2606      | 37/23843  | 0.785265 | 0.867753 | 0.825139 | Cacnb2/Ca   |
| GO_BP_m1GO:009017regulation 3/2606     | 37/23843  | 0.785265 | 0.867753 | 0.825139 | Abl2/Cthrc  |
| GO_BP_m1GO:190106guanosine- 3/2606     | 37/23843  | 0.785265 | 0.867753 | 0.825139 | Gphn/Moc    |
| GO_BP_m1GO:190289regulation 3/2606     | 37/23843  | 0.785265 | 0.867753 | 0.825139 | Hdac2/Nfk   |
| GO_BP_m1GO:000243inflammatc 5/2606     | 59/23843  | 0.786907 | 0.86924  | 0.826553 | Gpx1/Gpx2   |
| GO_BP_m1GO:004584positive reg 5/2606   | 59/23843  | 0.786907 | 0.86924  | 0.826553 | Dmrt1/Drd   |
| GO_BP_m1GO:007115regulation 5/2606     | 59/23843  | 0.786907 | 0.86924  | 0.826553 | Calr/Cdkn1  |
| GO_BP_m1GO:002154cerebellum 9/2606     | 101/23843 | 0.787432 | 0.86971  | 0.827    | Abl2/Cdk5,  |
| GO_BP_m1GO:002261ribonucleo 20/2606    | 212/23843 | 0.788795 | 0.871105 | 0.828327 | Atr/Noct/C  |
| GO_BP_m1GO:000727ensheathm 13/2606     | 142/23843 | 0.789103 | 0.871118 | 0.828339 | Ahnak2/Cc   |
| GO_BP_m1GO:000733single fertil 13/2606 | 142/23843 | 0.789103 | 0.871118 | 0.828339 | 1700016DC   |
| GO_BP_m1GO:000836axon enshe 13/2606    | 142/23843 | 0.789103 | 0.871118 | 0.828339 | Ahnak2/Cc   |
| GO_BP_m1GO:002170developme 28/2606     | 291/23843 | 0.789876 | 0.871862 | 0.829046 | Abl2/Acrbq  |
| GO_BP_m1GO:000317atrioventric 2/2606   | 26/23843  | 0.793479 | 0.873862 | 0.830948 | Smad6/Zfp   |
| GO_BP_m1GO:000329muscle hyp 2/2606     | 26/23843  | 0.793479 | 0.873862 | 0.830948 | Atp2b4/My   |
| GO_BP_m1GO:000631mitotic rec 2/2606    | 26/23843  | 0.793479 | 0.873862 | 0.830948 | Blm/Xrcc1   |
| GO_BP_m1GO:000688cell volum 2/2606     | 26/23843  | 0.793479 | 0.873862 | 0.830948 | Kcnn4/Slc1  |
| GO_BP_m1GO:000700inner mitoc 2/2606    | 26/23843  | 0.793479 | 0.873862 | 0.830948 | Myc/Timm.   |
| GO_BP_m1GO:000805mitochond 2/2606      | 26/23843  | 0.793479 | 0.873862 | 0.830948 | Bnip3/Park  |
| GO_BP_m1GO:000929mRNA tran 2/2606      | 26/23843  | 0.793479 | 0.873862 | 0.830948 | Lmo2/Sox1   |
| GO_BP_m1GO:001489cardiac mu 2/2606     | 26/23843  | 0.793479 | 0.873862 | 0.830948 | Atp2b4/My   |

|                                        |           |          |          |          |             |
|----------------------------------------|-----------|----------|----------|----------|-------------|
| GO_BP_m1GO:00161εsnRNA pro 2/2606      | 26/23843  | 0.793479 | 0.873862 | 0.830948 | Exosc9/Ints |
| GO_BP_m1GO:003081positive reç 2/2606   | 26/23843  | 0.793479 | 0.873862 | 0.830948 | Calcr/Nf1   |
| GO_BP_m1GO:00427εpositive reç 2/2606   | 26/23843  | 0.793479 | 0.873862 | 0.830948 | Arntl/Uts2r |
| GO_BP_m1GO:00430εamino acid 2/2606     | 26/23843  | 0.793479 | 0.873862 | 0.830948 | Arl6ip5/AU  |
| GO_BP_m1GO:00464εmembrane 2/2606       | 26/23843  | 0.793479 | 0.873862 | 0.830948 | Asah2/Smç   |
| GO_BP_m1GO:00485εnegative re 2/2606    | 26/23843  | 0.793479 | 0.873862 | 0.830948 | Adora1/Hti  |
| GO_BP_m1GO:00509εpositive reç 2/2606   | 26/23843  | 0.793479 | 0.873862 | 0.830948 | Prkca/Scg2  |
| GO_BP_m1GO:00519εpositive reç 2/2606   | 26/23843  | 0.793479 | 0.873862 | 0.830948 | Fen1/H2afy  |
| GO_BP_m1GO:00610εnegative re 2/2606    | 26/23843  | 0.793479 | 0.873862 | 0.830948 | Rflna/Nog   |
| GO_BP_m1GO:190107glucosamir 2/2606     | 26/23843  | 0.793479 | 0.873862 | 0.830948 | Chil5/Ogt   |
| GO_BP_m1GO:00022εT cell activç 10/2606 | 112/23843 | 0.794028 | 0.874247 | 0.831314 | Gm13271/    |
| GO_BP_m1GO:00433εresponse tr 10/2606   | 112/23843 | 0.794028 | 0.874247 | 0.831314 | Cav1/Ddx2   |
| GO_BP_m1GO:00550C muscle cell 18/2606  | 193/23843 | 0.794976 | 0.874455 | 0.831512 | Acta1/Adr   |
| GO_BP_m1GO:00320εpositive reç 7/2606   | 81/23843  | 0.795658 | 0.874455 | 0.831512 | Abat/Ano1   |
| GO_BP_m1GO:00480εregulation 7/2606     | 81/23843  | 0.795658 | 0.874455 | 0.831512 | Fmr1/Hmx:   |
| GO_BP_m1GO:00106εregulation 4/2606     | 49/23843  | 0.797988 | 0.874455 | 0.831512 | Bnip3/Cam   |
| GO_BP_m1GO:003021megakaryo 4/2606      | 49/23843  | 0.797988 | 0.874455 | 0.831512 | Abi1/Cib1/  |
| GO_BP_m1GO:00308εregulation 4/2606     | 49/23843  | 0.797988 | 0.874455 | 0.831512 | Cfl1/Gsn/P  |
| GO_BP_m1GO:00432εapical junct 4/2606   | 49/23843  | 0.797988 | 0.874455 | 0.831512 | Cdh1/Cgn/   |
| GO_BP_m1GO:00458εnegative re 4/2606    | 49/23843  | 0.797988 | 0.874455 | 0.831512 | Cav1/Fmr1   |
| GO_BP_m1GO:19032C negative re 4/2606   | 49/23843  | 0.797988 | 0.874455 | 0.831512 | Gpx1/Hsph   |
| GO_BP_m1GO:00096εresponse tr 3/2606    | 38/23843  | 0.800404 | 0.874455 | 0.831512 | Arg1/Jagn1  |
| GO_BP_m1GO:00514εpositive reç 3/2606   | 38/23843  | 0.800404 | 0.874455 | 0.831512 | Adra1d/Gp   |
| GO_BP_m1GO:007084response tr 3/2606    | 38/23843  | 0.800404 | 0.874455 | 0.831512 | Cfl1/Foxc1/ |
| GO_BP_m1GO:00725εmaintenanç 3/2606     | 38/23843  | 0.800404 | 0.874455 | 0.831512 | Cdk5/Ciz1/  |
| GO_BP_m1GO:00484εcell matura 17/2606   | 184/23843 | 0.801995 | 0.874455 | 0.831512 | Abl2/Acrbç  |
| GO_BP_m1GO:005121cartilage dç 17/2606  | 184/23843 | 0.801995 | 0.874455 | 0.831512 | Bbs2/Bmpç   |
| GO_BP_m1GO:00303εlung develç 20/2606   | 214/23843 | 0.802032 | 0.874455 | 0.831512 | Abca12/As   |
| GO_BP_m1GO:00310εregulation 6/2606     | 71/23843  | 0.802042 | 0.874455 | 0.831512 | Dmrtc2/H2   |
| GO_BP_m1GO:00018εendothelial 1/2606    | 14/23843  | 0.802281 | 0.874455 | 0.831512 | Ift88       |
| GO_BP_m1GO:00027εpositive reç 1/2606   | 14/23843  | 0.802281 | 0.874455 | 0.831512 | Sash3       |
| GO_BP_m1GO:00060εuronic acid 1/2606    | 14/23843  | 0.802281 | 0.874455 | 0.831512 | Ugt1a9      |
| GO_BP_m1GO:000707mitotic chr 1/2606    | 14/23843  | 0.802281 | 0.874455 | 0.831512 | Nusap1      |
| GO_BP_m1GO:000717negative re 1/2606    | 14/23843  | 0.802281 | 0.874455 | 0.831512 | Gprc5a      |
| GO_BP_m1GO:000907aromatic al 1/2606    | 14/23843  | 0.802281 | 0.874455 | 0.831512 | HpdI        |
| GO_BP_m1GO:000914pyrimidine 1/2606     | 14/23843  | 0.802281 | 0.874455 | 0.831512 | Nme6        |
| GO_BP_m1GO:001071regulation 1/2606     | 14/23843  | 0.802281 | 0.874455 | 0.831512 | Fscn1       |
| GO_BP_m1GO:00108εnegative re 1/2606    | 14/23843  | 0.802281 | 0.874455 | 0.831512 | CtsI        |
| GO_BP_m1GO:00148εgastro-inte 1/2606    | 14/23843  | 0.802281 | 0.874455 | 0.831512 | Tacr2       |
| GO_BP_m1GO:00148εregulation 1/2606     | 14/23843  | 0.802281 | 0.874455 | 0.831512 | Ephb1       |
| GO_BP_m1GO:001607snoRNA mç 1/2606      | 14/23843  | 0.802281 | 0.874455 | 0.831512 | Nop10       |
| GO_BP_m1GO:00190εviral translç 1/2606  | 14/23843  | 0.802281 | 0.874455 | 0.831512 | Eif3f       |
| GO_BP_m1GO:00195εglucuronat 1/2606     | 14/23843  | 0.802281 | 0.874455 | 0.831512 | Ugt1a9      |
| GO_BP_m1GO:00215εcell prolifer 1/2606  | 14/23843  | 0.802281 | 0.874455 | 0.831512 | Cend1       |
| GO_BP_m1GO:00217C cerebellar l 1/2606  | 14/23843  | 0.802281 | 0.874455 | 0.831512 | Cend1       |
| GO_BP_m1GO:00217εglial cell fat 1/2606 | 14/23843  | 0.802281 | 0.874455 | 0.831512 | Nrg1        |
| GO_BP_m1GO:002187forebrain n 1/2606    | 14/23843  | 0.802281 | 0.874455 | 0.831512 | Tbr1        |
| GO_BP_m1GO:00219C rostrocaud 1/2606    | 14/23843  | 0.802281 | 0.874455 | 0.831512 | Kdm2b       |

|                                      |           |          |          |          |            |
|--------------------------------------|-----------|----------|----------|----------|------------|
| GO_BP_m1GO:002193hindbrain r1/2606   | 14/23843  | 0.802281 | 0.874455 | 0.831512 | Cend1      |
| GO_BP_m1GO:002195adenohypoc1/2606    | 14/23843  | 0.802281 | 0.874455 | 0.831512 | Sox2       |
| GO_BP_m1GO:003082positive re1/2606   | 14/23843  | 0.802281 | 0.874455 | 0.831512 | Guca1a     |
| GO_BP_m1GO:003195locomotior1/2606    | 14/23843  | 0.802281 | 0.874455 | 0.831512 | Drd3       |
| GO_BP_m1GO:003260granulocyto1/2606   | 14/23843  | 0.802281 | 0.874455 | 0.831512 | Il12b      |
| GO_BP_m1GO:003264regulation 1/2606   | 14/23843  | 0.802281 | 0.874455 | 0.831512 | Il12b      |
| GO_BP_m1GO:003413toll-like rec1/2606 | 14/23843  | 0.802281 | 0.874455 | 0.831512 | Tnip2      |
| GO_BP_m1GO:003434glial cell ap1/2606 | 14/23843  | 0.802281 | 0.874455 | 0.831512 | Prkca      |
| GO_BP_m1GO:003447ncRNA 5'-c1/2606    | 14/23843  | 0.802281 | 0.874455 | 0.831512 | Rpp40      |
| GO_BP_m1GO:003475iron ion tra1/2606  | 14/23843  | 0.802281 | 0.874455 | 0.831512 | Slc40a1    |
| GO_BP_m1GO:004217xenobiotic 1/2606   | 14/23843  | 0.802281 | 0.874455 | 0.831512 | Acsl1      |
| GO_BP_m1GO:004240cellular bio 1/2606 | 14/23843  | 0.802281 | 0.874455 | 0.831512 | Sat1       |
| GO_BP_m1GO:004321myelin mai1/2606    | 14/23843  | 0.802281 | 0.874455 | 0.831512 | Ahnak2     |
| GO_BP_m1GO:004505positive thy1/2606  | 14/23843  | 0.802281 | 0.874455 | 0.831512 | Ptprc      |
| GO_BP_m1GO:004506negative th1/2606   | 14/23843  | 0.802281 | 0.874455 | 0.831512 | Ptprc      |
| GO_BP_m1GO:004519establishm1/2606    | 14/23843  | 0.802281 | 0.874455 | 0.831512 | Tcf15      |
| GO_BP_m1GO:004535type I inter1/2606  | 14/23843  | 0.802281 | 0.874455 | 0.831512 | Nmi        |
| GO_BP_m1GO:004572negative re1/2606   | 14/23843  | 0.802281 | 0.874455 | 0.831512 | C1qtnf3    |
| GO_BP_m1GO:004633phosphatic1/2606    | 14/23843  | 0.802281 | 0.874455 | 0.831512 | Pisd       |
| GO_BP_m1GO:004647phosphatic1/2606    | 14/23843  | 0.802281 | 0.874455 | 0.831512 | Ptpmt1     |
| GO_BP_m1GO:004683phosphory1/2606     | 14/23843  | 0.802281 | 0.874455 | 0.831512 | Synj1      |
| GO_BP_m1GO:005075chemokine1/2606     | 14/23843  | 0.802281 | 0.874455 | 0.831512 | lfng       |
| GO_BP_m1GO:005085regulation 1/2606   | 14/23843  | 0.802281 | 0.874455 | 0.831512 | Ptprc      |
| GO_BP_m1GO:005086positive re1/2606   | 14/23843  | 0.802281 | 0.874455 | 0.831512 | Kcnn4      |
| GO_BP_m1GO:005129centrosom1/2606     | 14/23843  | 0.802281 | 0.874455 | 0.831512 | Ranbp1     |
| GO_BP_m1GO:006001radial glial 1/2606 | 14/23843  | 0.802281 | 0.874455 | 0.831512 | Cdh2       |
| GO_BP_m1GO:006004regulation 1/2606   | 14/23843  | 0.802281 | 0.874455 | 0.831512 | Mt3        |
| GO_BP_m1GO:006033regulation 1/2606   | 14/23843  | 0.802281 | 0.874455 | 0.831512 | Arg1       |
| GO_BP_m1GO:006033regulation 1/2606   | 14/23843  | 0.802281 | 0.874455 | 0.831512 | Arg1       |
| GO_BP_m1GO:006073prostate gl1/2606   | 14/23843  | 0.802281 | 0.874455 | 0.831512 | Plag1      |
| GO_BP_m1GO:006130cardiac net1/2606   | 14/23843  | 0.802281 | 0.874455 | 0.831512 | Jag1       |
| GO_BP_m1GO:007029renal absor1/2606   | 14/23843  | 0.802281 | 0.874455 | 0.831512 | Gsn        |
| GO_BP_m1GO:007030lens fiber c1/2606  | 14/23843  | 0.802281 | 0.874455 | 0.831512 | Epha2      |
| GO_BP_m1GO:007154inositol ph1/2606   | 14/23843  | 0.802281 | 0.874455 | 0.831512 | Synj1      |
| GO_BP_m1GO:007180positive re1/2606   | 14/23843  | 0.802281 | 0.874455 | 0.831512 | Fscn1      |
| GO_BP_m1GO:009015establishm1/2606    | 14/23843  | 0.802281 | 0.874455 | 0.831512 | Timm22     |
| GO_BP_m1GO:009026regulation 1/2606   | 14/23843  | 0.802281 | 0.874455 | 0.831512 | Tpr        |
| GO_BP_m1GO:014013positive re1/2606   | 14/23843  | 0.802281 | 0.874455 | 0.831512 | Ccl4       |
| GO_BP_m1GO:190107guanosine-1/2606    | 14/23843  | 0.802281 | 0.874455 | 0.831512 | Nme6       |
| GO_BP_m1GO:190121regulation 1/2606   | 14/23843  | 0.802281 | 0.874455 | 0.831512 | Nog        |
| GO_BP_m1GO:190350regulation 1/2606   | 14/23843  | 0.802281 | 0.874455 | 0.831512 | Tpr        |
| GO_BP_m1GO:190481regulation 1/2606   | 14/23843  | 0.802281 | 0.874455 | 0.831512 | H2afy      |
| GO_BP_m1GO:190492regulation 1/2606   | 14/23843  | 0.802281 | 0.874455 | 0.831512 | Park2      |
| GO_BP_m1GO:200025regulation 1/2606   | 14/23843  | 0.802281 | 0.874455 | 0.831512 | Susd4      |
| GO_BP_m1GO:200065positive re1/2606   | 14/23843  | 0.802281 | 0.874455 | 0.831512 | Slc9a1     |
| GO_BP_m1GO:000189embryonic 10/2606   | 113/23843 | 0.802917 | 0.874931 | 0.831965 | Adm/Cdkn   |
| GO_BP_m1GO:009027positive re10/2606  | 113/23843 | 0.802917 | 0.874931 | 0.831965 | Abat/Ano1  |
| GO_BP_m1GO:000691phagocyto:14/2606   | 154/23843 | 0.803817 | 0.875803 | 0.832794 | Cd36/Ighv: |



|                   |             |         |           |          |          |          |             |
|-------------------|-------------|---------|-----------|----------|----------|----------|-------------|
| GO_BP_m1GO:000276 | immune re   | 31/2606 | 323/23843 | 0.804245 | 0.876161 | 0.833134 | Bcar1/Btn1l |
| GO_BP_m1GO:000042 | autophagy   | 7/2606  | 82/23843  | 0.805932 | 0.877672 | 0.834571 | Atg2a/Bnip  |
| GO_BP_m1GO:003064 | regulation  | 7/2606  | 82/23843  | 0.805932 | 0.877672 | 0.834571 | Atp6v0c/A   |
| GO_BP_m1GO:006172 | mitochond   | 7/2606  | 82/23843  | 0.805932 | 0.877672 | 0.834571 | Atg2a/Bnip  |
| GO_BP_m1GO:005159 | response tr | 9/2606  | 103/23843 | 0.806147 | 0.877798 | 0.834691 | Apobec1/A   |
| GO_BP_m1GO:004642 | regulation  | 18/2606 | 195/23843 | 0.808546 | 0.880301 | 0.83707  | Cav1/Cdk5   |
| GO_BP_m1GO:003083 | positive re | 8/2606  | 93/23843  | 0.810344 | 0.880682 | 0.837433 | Cdc42ep5/   |
| GO_BP_m1GO:000234 | response tr | 2/2606  | 27/23843  | 0.810682 | 0.880682 | 0.837433 | Il12b/Ulbp  |
| GO_BP_m1GO:001488 | cardiac mu  | 2/2606  | 27/23843  | 0.810682 | 0.880682 | 0.837433 | Atp2b4/My   |
| GO_BP_m1GO:001988 | antigen pr  | 2/2606  | 27/23843  | 0.810682 | 0.880682 | 0.837433 | H2-DMb2/    |
| GO_BP_m1GO:003082 | regulation  | 2/2606  | 27/23843  | 0.810682 | 0.880682 | 0.837433 | Guca1a/Lh   |
| GO_BP_m1GO:003163 | plasminog   | 2/2606  | 27/23843  | 0.810682 | 0.880682 | 0.837433 | F11/Tmprs   |
| GO_BP_m1GO:003281 | positive re | 2/2606  | 27/23843  | 0.810682 | 0.880682 | 0.837433 | Il12b/Ulbp  |
| GO_BP_m1GO:003598 | endoderm    | 2/2606  | 27/23843  | 0.810682 | 0.880682 | 0.837433 | Col5a1/So   |
| GO_BP_m1GO:003600 | positive re | 2/2606  | 27/23843  | 0.810682 | 0.880682 | 0.837433 | Atf3/Creb3  |
| GO_BP_m1GO:004874 | smooth m    | 2/2606  | 27/23843  | 0.810682 | 0.880682 | 0.837433 | Nf1/Osr1    |
| GO_BP_m1GO:005092 | regulation  | 2/2606  | 27/23843  | 0.810682 | 0.880682 | 0.837433 | Prkca/Scg2  |
| GO_BP_m1GO:005115 | regulation  | 2/2606  | 27/23843  | 0.810682 | 0.880682 | 0.837433 | Med28/Rbj   |
| GO_BP_m1GO:006071 | labyrinthi  | 2/2606  | 27/23843  | 0.810682 | 0.880682 | 0.837433 | Adm/Il10    |
| GO_BP_m1GO:007097 | protein K1  | 2/2606  | 27/23843  | 0.810682 | 0.880682 | 0.837433 | Cdc23/Parl  |
| GO_BP_m1GO:190289 | positive re | 2/2606  | 27/23843  | 0.810682 | 0.880682 | 0.837433 | Nfkb1/Sma   |
| GO_BP_m1GO:004396 | histone H3  | 5/2606  | 61/23843  | 0.810767 | 0.880682 | 0.837433 | Brpf3/Kat2  |
| GO_BP_m1GO:004566 | regulation  | 5/2606  | 61/23843  | 0.810767 | 0.880682 | 0.837433 | Cxcl10/Flot |
| GO_BP_m1GO:200102 | negative re | 5/2606  | 61/23843  | 0.810767 | 0.880682 | 0.837433 | Fbxo18/Nu   |
| GO_BP_m1GO:190040 | negative re | 4/2606  | 50/23843  | 0.810801 | 0.880682 | 0.837433 | Gpx1/Hsps   |
| GO_BP_m1GO:000740 | axonogene   | 45/2606 | 461/23843 | 0.811526 | 0.881361 | 0.838079 | Aatk/Ache   |
| GO_BP_m1GO:190320 | regulation  | 6/2606  | 72/23843  | 0.812728 | 0.882557 | 0.839216 | Endog/Gp    |
| GO_BP_m1GO:000734 | acrosome    | 13/2606 | 39/23843  | 0.814636 | 0.884191 | 0.84077  | Hyal3/Pkdr  |
| GO_BP_m1GO:003817 | neurotropt  | 3/2606  | 39/23843  | 0.814636 | 0.884191 | 0.84077  | Bcar1/Ndn   |
| GO_BP_m1GO:004502 | early endo  | 3/2606  | 39/23843  | 0.814636 | 0.884191 | 0.84077  | Dnajc13/Ez  |
| GO_BP_m1GO:004874 | skeletal m  | 3/2606  | 39/23843  | 0.814636 | 0.884191 | 0.84077  | Acta1/Gpx   |
| GO_BP_m1GO:003000 | cellular mo | 9/2606  | 104/23843 | 0.815028 | 0.88446  | 0.841026 | Atp1b2/At   |
| GO_BP_m1GO:009902 | plasma me   | 18/2606 | 196/23843 | 0.815085 | 0.88446  | 0.841026 | Cd36/Gsn/   |
| GO_BP_m1GO:005114 | positive re | 7/2606  | 83/23843  | 0.815804 | 0.885022 | 0.84156  | Akap6/Cav   |
| GO_BP_m1GO:005149 | regulation  | 7/2606  | 83/23843  | 0.815804 | 0.885022 | 0.84156  | Ctgf/Itgb1t |
| GO_BP_m1GO:190227 | regulation  | 16/2606 | 176/23843 | 0.816252 | 0.885399 | 0.841918 | Apobec1/E   |
| GO_BP_m1GO:009872 | maintenan   | 15/2606 | 166/23843 | 0.817202 | 0.885823 | 0.842322 | Cdh2/Cul4   |
| GO_BP_m1GO:190489 | regulation  | 18/2606 | 197/23843 | 0.821462 | 0.885823 | 0.842322 | Cav1/Cdk5   |
| GO_BP_m1GO:002169 | cerebellar  | 5/2606  | 62/23843  | 0.821871 | 0.885823 | 0.842322 | Cdk5/Cenc   |
| GO_BP_m1GO:006103 | regulation  | 5/2606  | 62/23843  | 0.821871 | 0.885823 | 0.842322 | Ctgf/Rflna/ |
| GO_BP_m1GO:190122 | positive re | 5/2606  | 62/23843  | 0.821871 | 0.885823 | 0.842322 | Calr/Eif2ak |
| GO_BP_m1GO:000691 | phagocyto   | 17/2606 | 187/23843 | 0.822083 | 0.885823 | 0.842322 | Cd36/Gsn/   |
| GO_BP_m1GO:004566 | regulation  | 12/2606 | 136/23843 | 0.822109 | 0.885823 | 0.842322 | Noct/Clic1  |
| GO_BP_m1GO:000173 | establishm  | 4/2606  | 51/23843  | 0.822942 | 0.885823 | 0.842322 | Abl2/Cthrc  |
| GO_BP_m1GO:001066 | regulation  | 4/2606  | 51/23843  | 0.822942 | 0.885823 | 0.842322 | Bnip3/Cam   |
| GO_BP_m1GO:003508 | establishm  | 4/2606  | 51/23843  | 0.822942 | 0.885823 | 0.842322 | Ezr/Fscn1/l |
| GO_BP_m1GO:004364 | inositol ph | 4/2606  | 51/23843  | 0.822942 | 0.885823 | 0.842322 | Adcyap1r1   |
| GO_BP_m1GO:006124 | establishm  | 4/2606  | 51/23843  | 0.822942 | 0.885823 | 0.842322 | Ezr/Fscn1/l |

|                                |        |          |          |          |          |             |
|--------------------------------|--------|----------|----------|----------|----------|-------------|
| GO_BP_m1GO:190201regulation    | 4/2606 | 51/23843 | 0.822942 | 0.885823 | 0.842322 | Ift88/Odf2/ |
| GO_BP_m1GO:001083telomere nr   | 6/2606 | 73/23843 | 0.822955 | 0.885823 | 0.842322 | Atr/Cct3/H  |
| GO_BP_m1GO:000029nuclear-tra   | 1/2606 | 15/23843 | 0.823904 | 0.885823 | 0.842322 | Exosc9      |
| GO_BP_m1GO:000071resolution    | 1/2606 | 15/23843 | 0.823904 | 0.885823 | 0.842322 | Cenpx       |
| GO_BP_m1GO:000072DNA doub      | 1/2606 | 15/23843 | 0.823904 | 0.885823 | 0.842322 | Blm         |
| GO_BP_m1GO:000318heart valve   | 1/2606 | 15/23843 | 0.823904 | 0.885823 | 0.842322 | Zfpm2       |
| GO_BP_m1GO:000612mitochond     | 1/2606 | 15/23843 | 0.823904 | 0.885823 | 0.842322 | Cox4i2      |
| GO_BP_m1GO:000633nucleosom     | 1/2606 | 15/23843 | 0.823904 | 0.885823 | 0.842322 | Smarce1     |
| GO_BP_m1GO:000667glycosylcer   | 1/2606 | 15/23843 | 0.823904 | 0.885823 | 0.842322 | B4galt3     |
| GO_BP_m1GO:000725I-kappaB p    | 1/2606 | 15/23843 | 0.823904 | 0.885823 | 0.842322 | Ddrgk1      |
| GO_BP_m1GO:000914nucleoside    | 1/2606 | 15/23843 | 0.823904 | 0.885823 | 0.842322 | Nudt1       |
| GO_BP_m1GO:001045negative re   | 1/2606 | 15/23843 | 0.823904 | 0.885823 | 0.842322 | Wnt3a       |
| GO_BP_m1GO:001052negative re   | 1/2606 | 15/23843 | 0.823904 | 0.885823 | 0.842322 | Fkbp1b      |
| GO_BP_m1GO:001096magnesium     | 1/2606 | 15/23843 | 0.823904 | 0.885823 | 0.842322 | Trmt10a     |
| GO_BP_m1GO:001473regulation    | 1/2606 | 15/23843 | 0.823904 | 0.885823 | 0.842322 | Myh7        |
| GO_BP_m1GO:001485skeletal m    | 1/2606 | 15/23843 | 0.823904 | 0.885823 | 0.842322 | Ephb1       |
| GO_BP_m1GO:001568ferric iron   | 1/2606 | 15/23843 | 0.823904 | 0.885823 | 0.842322 | Rep15       |
| GO_BP_m1GO:001802peptidyl-ly   | 1/2606 | 15/23843 | 0.823904 | 0.885823 | 0.842322 | Dmrtc2      |
| GO_BP_m1GO:001964aerobic ele   | 1/2606 | 15/23843 | 0.823904 | 0.885823 | 0.842322 | Cox4i2      |
| GO_BP_m1GO:002169cerebellar f  | 1/2606 | 15/23843 | 0.823904 | 0.885823 | 0.842322 | Cend1       |
| GO_BP_m1GO:00300Ccellular pot  | 1/2606 | 15/23843 | 0.823904 | 0.885823 | 0.842322 | Atp1b2      |
| GO_BP_m1GO:003015pancreatic    | 1/2606 | 15/23843 | 0.823904 | 0.885823 | 0.842322 | Nr1h2       |
| GO_BP_m1GO:003126pseudopoc     | 1/2606 | 15/23843 | 0.823904 | 0.885823 | 0.842322 | Cdc42ep5    |
| GO_BP_m1GO:003248Cdc42 prot    | 1/2606 | 15/23843 | 0.823904 | 0.885823 | 0.842322 | Shtn1       |
| GO_BP_m1GO:003278negative re   | 1/2606 | 15/23843 | 0.823904 | 0.885823 | 0.842322 | Cnn3        |
| GO_BP_m1GO:003295inositol tris | 1/2606 | 15/23843 | 0.823904 | 0.885823 | 0.842322 | P2ry1       |
| GO_BP_m1GO:00423Cnegative re   | 1/2606 | 15/23843 | 0.823904 | 0.885823 | 0.842322 | Ei24        |
| GO_BP_m1GO:004279nucleolar l   | 1/2606 | 15/23843 | 0.823904 | 0.885823 | 0.842322 | H2afy       |
| GO_BP_m1GO:004338negative T    | 1/2606 | 15/23843 | 0.823904 | 0.885823 | 0.842322 | Ptpcr       |
| GO_BP_m1GO:004529mRNA cis      | 1/2606 | 15/23843 | 0.823904 | 0.885823 | 0.842322 | Psip1       |
| GO_BP_m1GO:004565regulation    | 1/2606 | 15/23843 | 0.823904 | 0.885823 | 0.842322 | Myc         |
| GO_BP_m1GO:004613pyrimidine    | 1/2606 | 15/23843 | 0.823904 | 0.885823 | 0.842322 | Nme6        |
| GO_BP_m1GO:005113chaperone     | 1/2606 | 15/23843 | 0.823904 | 0.885823 | 0.842322 | Bbs10       |
| GO_BP_m1GO:005192sulfation     | 1/2606 | 15/23843 | 0.823904 | 0.885823 | 0.842322 | Sult1a1     |
| GO_BP_m1GO:005193L-glutamat    | 1/2606 | 15/23843 | 0.823904 | 0.885823 | 0.842322 | Arl6ip5     |
| GO_BP_m1GO:005506phosphate     | 1/2606 | 15/23843 | 0.823904 | 0.885823 | 0.842322 | Rnls        |
| GO_BP_m1GO:006014negative re   | 1/2606 | 15/23843 | 0.823904 | 0.885823 | 0.842322 | Zc3h12a     |
| GO_BP_m1GO:00607Cregulation    | 1/2606 | 15/23843 | 0.823904 | 0.885823 | 0.842322 | Oas1f       |
| GO_BP_m1GO:006096negative re   | 1/2606 | 15/23843 | 0.823904 | 0.885823 | 0.842322 | Zc3h12a     |
| GO_BP_m1GO:00613Ccardiac net   | 1/2606 | 15/23843 | 0.823904 | 0.885823 | 0.842322 | Jag1        |
| GO_BP_m1GO:007016enamel mir    | 1/2606 | 15/23843 | 0.823904 | 0.885823 | 0.842322 | Tbx1        |
| GO_BP_m1GO:00702Cestablishm    | 1/2606 | 15/23843 | 0.823904 | 0.885823 | 0.842322 | Nabp2       |
| GO_BP_m1GO:007072response tr   | 1/2606 | 15/23843 | 0.823904 | 0.885823 | 0.842322 | Smo         |
| GO_BP_m1GO:007102RNA survei    | 1/2606 | 15/23843 | 0.823904 | 0.885823 | 0.842322 | Exosc9      |
| GO_BP_m1GO:00714Ccellular res  | 1/2606 | 15/23843 | 0.823904 | 0.885823 | 0.842322 | Cd36        |
| GO_BP_m1GO:007163positive re   | 1/2606 | 15/23843 | 0.823904 | 0.885823 | 0.842322 | Ptgs2       |
| GO_BP_m1GO:007218ureter dev    | 1/2606 | 15/23843 | 0.823904 | 0.885823 | 0.842322 | Osr1        |
| GO_BP_m1GO:00725Cdivalent inc  | 1/2606 | 15/23843 | 0.823904 | 0.885823 | 0.842322 | Rnls        |

|                                       |           |          |          |          |             |
|---------------------------------------|-----------|----------|----------|----------|-------------|
| GO_BP_m1GO:00725C trivalent inc1/2606 | 15/23843  | 0.823904 | 0.885823 | 0.842322 | Rnl5        |
| GO_BP_m1GO:007251 trivalent inc1/2606 | 15/23843  | 0.823904 | 0.885823 | 0.842322 | Rep15       |
| GO_BP_m1GO:007267 neutrophil 1/2606   | 15/23843  | 0.823904 | 0.885823 | 0.842322 | Adam8       |
| GO_BP_m1GO:008601 atrial cardi1/2606  | 15/23843  | 0.823904 | 0.885823 | 0.842322 | Cacnb2      |
| GO_BP_m1GO:008602 atrial cardi1/2606  | 15/23843  | 0.823904 | 0.885823 | 0.842322 | Cacnb2      |
| GO_BP_m1GO:008606 atrial cardi1/2606  | 15/23843  | 0.823904 | 0.885823 | 0.842322 | Cacnb2      |
| GO_BP_m1GO:009008 regulation 1/2606   | 15/23843  | 0.823904 | 0.885823 | 0.842322 | Dnaja4      |
| GO_BP_m1GO:190354 positive re1/2606   | 15/23843  | 0.823904 | 0.885823 | 0.842322 | Smpd3       |
| GO_BP_m1GO:190459 negative re1/2606   | 15/23843  | 0.823904 | 0.885823 | 0.842322 | Ei24        |
| GO_BP_m1GO:200064 negative re1/2606   | 15/23843  | 0.823904 | 0.885823 | 0.842322 | Nf1         |
| GO_BP_m1GO:200101 negative re1/2606   | 15/23843  | 0.823904 | 0.885823 | 0.842322 | Ephb1       |
| GO_BP_m1GO:200102 positive re1/2606   | 15/23843  | 0.823904 | 0.885823 | 0.842322 | Fgf16       |
| GO_BP_m1GO:190165 cellular res11/2606 | 126/23843 | 0.824672 | 0.886111 | 0.842595 | Eif4e/Gdnf  |
| GO_BP_m1GO:00434C steroid hor14/2606  | 157/23843 | 0.825464 | 0.886111 | 0.842595 | Arntl/Calr/ |
| GO_BP_m1GO:000183 blastocyst 2/2606   | 28/23843  | 0.826593 | 0.886111 | 0.842595 | Esrrb/Prpf1 |
| GO_BP_m1GO:000597 regulation 2/2606   | 28/23843  | 0.826593 | 0.886111 | 0.842595 | Esrrb/Ppp1  |
| GO_BP_m1GO:000621 pyrimidine 2/2606   | 28/23843  | 0.826593 | 0.886111 | 0.842595 | Dpyd/Nme    |
| GO_BP_m1GO:000637 mRNA clea2/2606     | 28/23843  | 0.826593 | 0.886111 | 0.842595 | Cpsf2/Cpsf  |
| GO_BP_m1GO:000717 regulation 2/2606   | 28/23843  | 0.826593 | 0.886111 | 0.842595 | Adora1/Gp   |
| GO_BP_m1GO:00093C rRNA trans2/2606    | 28/23843  | 0.826593 | 0.886111 | 0.842595 | Cd3eap/H2   |
| GO_BP_m1GO:001045 exit from r2/2606   | 28/23843  | 0.826593 | 0.886111 | 0.842595 | Cdkn1c/Ma   |
| GO_BP_m1GO:001096 regulation 2/2606   | 28/23843  | 0.826593 | 0.886111 | 0.842595 | Esrrb/Ppp1  |
| GO_BP_m1GO:001624 negative re2/2606   | 28/23843  | 0.826593 | 0.886111 | 0.842595 | Scfd1/Tigar |
| GO_BP_m1GO:002187 forebrain r2/2606   | 28/23843  | 0.826593 | 0.886111 | 0.842595 | Dmrt2/Pg    |
| GO_BP_m1GO:003022 monocyte 2/2606     | 28/23843  | 0.826593 | 0.886111 | 0.842595 | Fasn/Myc    |
| GO_BP_m1GO:003502 positive re2/2606   | 28/23843  | 0.826593 | 0.886111 | 0.842595 | Abra/Gpr1   |
| GO_BP_m1GO:004403 regulation 2/2606   | 28/23843  | 0.826593 | 0.886111 | 0.842595 | H19/Mpho    |
| GO_BP_m1GO:005082 positive re2/2606   | 28/23843  | 0.826593 | 0.886111 | 0.842595 | Cd36/Ptprj  |
| GO_BP_m1GO:005112 regulation 2/2606   | 28/23843  | 0.826593 | 0.886111 | 0.842595 | Gsn/Wipf1   |
| GO_BP_m1GO:006011 auditory re2/2606   | 28/23843  | 0.826593 | 0.886111 | 0.842595 | Myo3a/Paf   |
| GO_BP_m1GO:006063 regulation 2/2606   | 28/23843  | 0.826593 | 0.886111 | 0.842595 | Bbs2/Dnaa   |
| GO_BP_m1GO:007053 protein K62/2606    | 28/23843  | 0.826593 | 0.886111 | 0.842595 | Uimc1/Usp   |
| GO_BP_m1GO:007135 cellular res2/2606  | 28/23843  | 0.826593 | 0.886111 | 0.842595 | Fasn/Jak3   |
| GO_BP_m1GO:190204 negative re2/2606   | 28/23843  | 0.826593 | 0.886111 | 0.842595 | Dapk1/Gp    |
| GO_BP_m1GO:190313 mononucle2/2606     | 28/23843  | 0.826593 | 0.886111 | 0.842595 | Fasn/Myc    |
| GO_BP_m1GO:200019 regulation 2/2606   | 28/23843  | 0.826593 | 0.886111 | 0.842595 | P2ry2/Tnfs  |
| GO_BP_m1GO:009015 establishm18/2606   | 198/23843 | 0.827677 | 0.886858 | 0.843306 | Adora1/Arl  |
| GO_BP_m1GO:00308C positive re3/2606   | 40/23843  | 0.827997 | 0.886858 | 0.843306 | Calcr/Guca  |
| GO_BP_m1GO:00324E regulation 3/2606   | 40/23843  | 0.827997 | 0.886858 | 0.843306 | Oprd1/Pex   |
| GO_BP_m1GO:00432E sodium-inc3/2606    | 40/23843  | 0.827997 | 0.886858 | 0.843306 | Slc22a1/Slc |
| GO_BP_m1GO:00606C mammary 3/2606      | 40/23843  | 0.827997 | 0.886858 | 0.843306 | Cav3/Epha   |
| GO_BP_m1GO:007083 bicellular ti3/2606 | 40/23843  | 0.827997 | 0.886858 | 0.843306 | Cdh1/Cgn/   |
| GO_BP_m1GO:00860C cardiac mu3/2606    | 40/23843  | 0.827997 | 0.886858 | 0.843306 | Cacnb2/Ca   |
| GO_BP_m1GO:20012E positive re15/2606  | 168/23843 | 0.830692 | 0.889637 | 0.845948 | Atr/BC004C  |
| GO_BP_m1GO:00320C regulation 9/2606   | 106/23843 | 0.831858 | 0.890777 | 0.847032 | Arntl/Dgkq  |
| GO_BP_m1GO:00517E positive re6/2606   | 74/23843  | 0.832734 | 0.891497 | 0.847717 | Dmrt1/Drd   |
| GO_BP_m1GO:007142 ribonucleo6/2606    | 74/23843  | 0.832734 | 0.891497 | 0.847717 | Ddx19b/Nr   |
| GO_BP_m1GO:000716 establishm4/2606    | 52/23843  | 0.834431 | 0.893096 | 0.849237 | Abl2/Cthrc  |

|                                |         |           |          |          |          |             |
|--------------------------------|---------|-----------|----------|----------|----------|-------------|
| GO_BP_m1GO:007093protein K4    | 4/2606  | 52/23843  | 0.834431 | 0.893096 | 0.849237 | Arih2/Nmi   |
| GO_BP_m1GO:001921regulation    | 8/2606  | 96/23843  | 0.836836 | 0.894594 | 0.850662 | Dgkq/Ephx   |
| GO_BP_m1GO:000226cell activati | 24/2606 | 260/23843 | 0.837149 | 0.894594 | 0.850662 | Anxa3/Aplf  |
| GO_BP_m1GO:006004retina deve   | 14/2606 | 159/23843 | 0.838876 | 0.894594 | 0.850662 | Ache/Dll4/  |
| GO_BP_m1GO:000733binding of    | 3/2606  | 41/23843  | 0.840523 | 0.894594 | 0.850662 | Cct3/Fetub  |
| GO_BP_m1GO:001076positive re   | 3/2606  | 41/23843  | 0.840523 | 0.894594 | 0.850662 | Atp1b2/Fxy  |
| GO_BP_m1GO:001095negative re   | 3/2606  | 41/23843  | 0.840523 | 0.894594 | 0.850662 | Cdh1/Fmr1   |
| GO_BP_m1GO:001967NAD metal     | 3/2606  | 41/23843  | 0.840523 | 0.894594 | 0.850662 | Idh3a/Ldh   |
| GO_BP_m1GO:004749vesicle tran  | 3/2606  | 41/23843  | 0.840523 | 0.894594 | 0.850662 | Bloc1s5/Kif |
| GO_BP_m1GO:005165spindle loc.  | 3/2606  | 41/23843  | 0.840523 | 0.894594 | 0.850662 | Cenpa/Nus   |
| GO_BP_m1GO:009892vesicle-me    | 3/2606  | 41/23843  | 0.840523 | 0.894594 | 0.850662 | Dnajc13/Ez  |
| GO_BP_m1GO:190007negative re   | 3/2606  | 41/23843  | 0.840523 | 0.894594 | 0.850662 | Gpr21/Prkc  |
| GO_BP_m1GO:190331negative re   | 3/2606  | 41/23843  | 0.840523 | 0.894594 | 0.850662 | Cdh1/Fmr1   |
| GO_BP_m1GO:003105regulation    | 13/2606 | 149/23843 | 0.840977 | 0.894594 | 0.850662 | BC004004/   |
| GO_BP_m1GO:000915purine ribo   | 2/2606  | 29/23843  | 0.841289 | 0.894594 | 0.850662 | Pde11a/Pd   |
| GO_BP_m1GO:000926ribonucleo    | 2/2606  | 29/23843  | 0.841289 | 0.894594 | 0.850662 | Pde11a/Pd   |
| GO_BP_m1GO:001039histone mc    | 2/2606  | 29/23843  | 0.841289 | 0.894594 | 0.850662 | Kdm2b/Rin   |
| GO_BP_m1GO:003300positive re   | 2/2606  | 29/23843  | 0.841289 | 0.894594 | 0.850662 | Cd300lb/M   |
| GO_BP_m1GO:003311negative re   | 2/2606  | 29/23843  | 0.841289 | 0.894594 | 0.850662 | Rbm42/Srs   |
| GO_BP_m1GO:003426negative re   | 2/2606  | 29/23843  | 0.841289 | 0.894594 | 0.850662 | Bcas3/Plxn  |
| GO_BP_m1GO:003506positive re   | 2/2606  | 29/23843  | 0.841289 | 0.894594 | 0.850662 | Kat2a/Kat2  |
| GO_BP_m1GO:003588vascular sn   | 2/2606  | 29/23843  | 0.841289 | 0.894594 | 0.850662 | Adm/Smac    |
| GO_BP_m1GO:004216heme met      | 2/2606  | 29/23843  | 0.841289 | 0.894594 | 0.850662 | Cox15/Iba   |
| GO_BP_m1GO:005129establishm    | 2/2606  | 29/23843  | 0.841289 | 0.894594 | 0.850662 | Cenpa/Paf   |
| GO_BP_m1GO:006031cardiac epi   | 2/2606  | 29/23843  | 0.841289 | 0.894594 | 0.850662 | Has2/Nog    |
| GO_BP_m1GO:006057morphoge      | 2/2606  | 29/23843  | 0.841289 | 0.894594 | 0.850662 | Cfl1/Nog    |
| GO_BP_m1GO:007252pyrimidine    | 2/2606  | 29/23843  | 0.841289 | 0.894594 | 0.850662 | Nme6/Shr    |
| GO_BP_m1GO:009735autophago     | 2/2606  | 29/23843  | 0.841289 | 0.894594 | 0.850662 | Epg5/Snap   |
| GO_BP_m1GO:005085B cell rece   | 16/2606 | 180/23843 | 0.841893 | 0.894594 | 0.850662 | Bcar1/Cd1   |
| GO_BP_m1GO:007116ribonucleo    | 6/2606  | 75/23843  | 0.842074 | 0.894594 | 0.850662 | Ddx19b/Nr   |
| GO_BP_m1GO:000170mesoderm      | 5/2606  | 64/23843  | 0.842497 | 0.894594 | 0.850662 | Epha2/Fox   |
| GO_BP_m1GO:007135cellular res  | 5/2606  | 64/23843  | 0.842497 | 0.894594 | 0.850662 | Cav1/Mb2    |
| GO_BP_m1GO:000242immune re     | 29/2606 | 311/23843 | 0.842714 | 0.894594 | 0.850662 | Bcar1/Btnl  |
| GO_BP_m1GO:004315negative re   | 7/2606  | 86/23843  | 0.843082 | 0.894594 | 0.850662 | Gpx1/Mkl1   |
| GO_BP_m1GO:190113carbohydr     | 10/2606 | 118/23843 | 0.843115 | 0.894594 | 0.850662 | Abhd10/Cf   |
| GO_BP_m1GO:000072telomere r    | 1/2606  | 16/23843  | 0.843163 | 0.894594 | 0.850662 | Xrcc1       |
| GO_BP_m1GO:000092cell separa   | 1/2606  | 16/23843  | 0.843163 | 0.894594 | 0.850662 | Chmp1b      |
| GO_BP_m1GO:000171endoderm      | 1/2606  | 16/23843  | 0.843163 | 0.894594 | 0.850662 | Sox2        |
| GO_BP_m1GO:000183inner cell r  | 1/2606  | 16/23843  | 0.843163 | 0.894594 | 0.850662 | Prpf19      |
| GO_BP_m1GO:000246germinal c    | 1/2606  | 16/23843  | 0.843163 | 0.894594 | 0.850662 | Pkn1        |
| GO_BP_m1GO:000254chronic infl  | 1/2606  | 16/23843  | 0.843163 | 0.894594 | 0.850662 | Il10        |
| GO_BP_m1GO:000316cardiac cor   | 1/2606  | 16/23843  | 0.843163 | 0.894594 | 0.850662 | Nrg1        |
| GO_BP_m1GO:000651glycoprote    | 1/2606  | 16/23843  | 0.843163 | 0.894594 | 0.850662 | Man1b1      |
| GO_BP_m1GO:000660NLS-bearir    | 1/2606  | 16/23843  | 0.843163 | 0.894594 | 0.850662 | Nup54       |
| GO_BP_m1GO:000683water trans   | 1/2606  | 16/23843  | 0.843163 | 0.894594 | 0.850662 | Mylk2       |
| GO_BP_m1GO:000721G-protein     | 1/2606  | 16/23843  | 0.843163 | 0.894594 | 0.850662 | Grm2        |
| GO_BP_m1GO:000833histone m     | 1/2606  | 16/23843  | 0.843163 | 0.894594 | 0.850662 | Cpsf2       |
| GO_BP_m1GO:000922pyrimidine    | 1/2606  | 16/23843  | 0.843163 | 0.894594 | 0.850662 | Nme6        |

|                                |         |           |          |          |          |              |
|--------------------------------|---------|-----------|----------|----------|----------|--------------|
| GO_BP_m1GO:002197telencepha    | 1/2606  | 16/23843  | 0.843163 | 0.894594 | 0.850662 | Dmrta2       |
| GO_BP_m1GO:003082positive re   | 1/2606  | 16/23843  | 0.843163 | 0.894594 | 0.850662 | Guca1a       |
| GO_BP_m1GO:003223positive re   | 1/2606  | 16/23843  | 0.843163 | 0.894594 | 0.850662 | Tac1         |
| GO_BP_m1GO:003257response tr   | 1/2606  | 16/23843  | 0.843163 | 0.894594 | 0.850662 | Cav1         |
| GO_BP_m1GO:003612histone H3    | 1/2606  | 16/23843  | 0.843163 | 0.894594 | 0.850662 | Dmrta2       |
| GO_BP_m1GO:004275drinking be   | 1/2606  | 16/23843  | 0.843163 | 0.894594 | 0.850662 | Hrh3         |
| GO_BP_m1GO:00444Cadhesion o    | 1/2606  | 16/23843  | 0.843163 | 0.894594 | 0.850662 | Scarb1       |
| GO_BP_m1GO:004572positive re   | 1/2606  | 16/23843  | 0.843163 | 0.894594 | 0.850662 | Esrrb        |
| GO_BP_m1GO:004651ceramide c    | 1/2606  | 16/23843  | 0.843163 | 0.894594 | 0.850662 | Asah2        |
| GO_BP_m1GO:004675viral buddi   | 1/2606  | 16/23843  | 0.843163 | 0.894594 | 0.850662 | Chmp1b       |
| GO_BP_m1GO:005185disruption    | 1/2606  | 16/23843  | 0.843163 | 0.894594 | 0.850662 | Arg1         |
| GO_BP_m1GO:005187killing by h  | 1/2606  | 16/23843  | 0.843163 | 0.894594 | 0.850662 | Arg1         |
| GO_BP_m1GO:006002convergent    | 1/2606  | 16/23843  | 0.843163 | 0.894594 | 0.850662 | Zfp568       |
| GO_BP_m1GO:006025negative re   | 1/2606  | 16/23843  | 0.843163 | 0.894594 | 0.850662 | Idh2         |
| GO_BP_m1GO:00603Cregulation    | 1/2606  | 16/23843  | 0.843163 | 0.894594 | 0.850662 | Cav3         |
| GO_BP_m1GO:008601membrane      | 1/2606  | 16/23843  | 0.843163 | 0.894594 | 0.850662 | Cav1         |
| GO_BP_m1GO:009017establishm    | 1/2606  | 16/23843  | 0.843163 | 0.894594 | 0.850662 | Cthrc1       |
| GO_BP_m1GO:009709craniofacia   | 1/2606  | 16/23843  | 0.843163 | 0.894594 | 0.850662 | Mmp14        |
| GO_BP_m1GO:009732plasma me     | 1/2606  | 16/23843  | 0.843163 | 0.894594 | 0.850662 | Snx9         |
| GO_BP_m1GO:190218negative re   | 1/2606  | 16/23843  | 0.843163 | 0.894594 | 0.850662 | Vapb         |
| GO_BP_m1GO:190301negative re   | 1/2606  | 16/23843  | 0.843163 | 0.894594 | 0.850662 | Jak3         |
| GO_BP_m1GO:190377regulation    | 1/2606  | 16/23843  | 0.843163 | 0.894594 | 0.850662 | Cav1         |
| GO_BP_m1GO:190379regulation    | 1/2606  | 16/23843  | 0.843163 | 0.894594 | 0.850662 | Zc3h12a      |
| GO_BP_m1GO:190426negative re   | 1/2606  | 16/23843  | 0.843163 | 0.894594 | 0.850662 | Szt2         |
| GO_BP_m1GO:200031regulation    | 1/2606  | 16/23843  | 0.843163 | 0.894594 | 0.850662 | Smad7        |
| GO_BP_m1GO:007182protein-D     | 19/2606 | 211/23843 | 0.844452 | 0.895853 | 0.851859 | Cand1/Cer    |
| GO_BP_m1GO:000688regulation    | 8/2606  | 97/23843  | 0.844499 | 0.895984 | 0.851984 | Atp6v0c/A    |
| GO_BP_m1GO:000687cellular ir   | 4/2606  | 53/23843  | 0.845289 | 0.895984 | 0.851984 | Myc/Nubp     |
| GO_BP_m1GO:001065cardiac mu    | 4/2606  | 53/23843  | 0.845289 | 0.895984 | 0.851984 | Bnip3/Cam    |
| GO_BP_m1GO:003004actin filam   | 4/2606  | 53/23843  | 0.845289 | 0.895984 | 0.851984 | Cfl1/Gsn/P   |
| GO_BP_m1GO:003531hair cell dif | 4/2606  | 53/23843  | 0.845289 | 0.895984 | 0.851984 | Jag1/Mcolr   |
| GO_BP_m1GO:007127cellular res  | 4/2606  | 53/23843  | 0.845289 | 0.895984 | 0.851984 | Asph/Cpne    |
| GO_BP_m1GO:00903Cpositive re   | 4/2606  | 53/23843  | 0.845289 | 0.895984 | 0.851984 | Cd36/Myc/    |
| GO_BP_m1GO:000282positive re   | 9/2606  | 108/23843 | 0.847475 | 0.898193 | 0.854084 | Fam49b/lfr   |
| GO_BP_m1GO:000237immunoglc     | 20/2606 | 222/23843 | 0.849104 | 0.899811 | 0.855623 | Aplf/lfng/lc |
| GO_BP_m1GO:000632DNA pack      | 15/2606 | 171/23843 | 0.849512 | 0.900026 | 0.855827 | Bahd1/Cdk    |
| GO_BP_m1GO:004561regulation    | 15/2606 | 171/23843 | 0.849512 | 0.900026 | 0.855827 | Adam8/Ctl    |
| GO_BP_m1GO:002187forebrain n   | 6/2606  | 76/23843  | 0.850986 | 0.90137  | 0.857105 | Arx/Mir141   |
| GO_BP_m1GO:190395positive re   | 6/2606  | 76/23843  | 0.850986 | 0.90137  | 0.857105 | Arih2/Kat2   |
| GO_BP_m1GO:190432response tr   | 5/2606  | 65/23843  | 0.852048 | 0.902058 | 0.857759 | Gnai1/Mir1   |
| GO_BP_m1GO:190432cellular res  | 5/2606  | 65/23843  | 0.852048 | 0.902058 | 0.857759 | Gnai1/Mir1   |
| GO_BP_m1GO:000319endocardia    | 3/2606  | 42/23843  | 0.852252 | 0.902058 | 0.857759 | Erbp3/Jag1   |
| GO_BP_m1GO:004246eye photor    | 3/2606  | 42/23843  | 0.852252 | 0.902058 | 0.857759 | Fscn2/Th/T   |
| GO_BP_m1GO:005167membrane      | 3/2606  | 42/23843  | 0.852252 | 0.902058 | 0.857759 | Defa29/De    |
| GO_BP_m1GO:007016positive re   | 3/2606  | 42/23843  | 0.852252 | 0.902058 | 0.857759 | Mia3/Osr1    |
| GO_BP_m1GO:005165maintenan     | 8/2606  | 98/23843  | 0.852817 | 0.902548 | 0.858225 | Cav1/Cdk5    |
| GO_BP_m1GO:001644posttranscr   | 11/2606 | 130/23843 | 0.853424 | 0.902954 | 0.858612 | Fmr1/Gigyf   |
| GO_BP_m1GO:007182ribonucleo    | 20/2606 | 223/23843 | 0.854343 | 0.902954 | 0.858612 | Atr/Noct/C   |

|                                |         |           |          |          |          |            |
|--------------------------------|---------|-----------|----------|----------|----------|------------|
| GO_BP_m1GO:003812ERBB signa    | 9/2606  | 109/23843 | 0.854843 | 0.902954 | 0.858612 | Abl2/Adora |
| GO_BP_m1GO:000236T cell lineaç | 2/2606  | 30/23843  | 0.854846 | 0.902954 | 0.858612 | Il7/Prkdc  |
| GO_BP_m1GO:000622pyrimidine    | 2/2606  | 30/23843  | 0.854846 | 0.902954 | 0.858612 | Nme6/Shr   |
| GO_BP_m1GO:003296positive reç  | 2/2606  | 30/23843  | 0.854846 | 0.902954 | 0.858612 | Ctgf/Mkx   |
| GO_BP_m1GO:003414toll-like rec | 2/2606  | 30/23843  | 0.854846 | 0.902954 | 0.858612 | Ptpn22/Tic |
| GO_BP_m1GO:003532hippo signi   | 2/2606  | 30/23843  | 0.854846 | 0.902954 | 0.858612 | Lats1/Stk3 |
| GO_BP_m1GO:004248regulation    | 2/2606  | 30/23843  | 0.854846 | 0.902954 | 0.858612 | lft88/Wnt1 |
| GO_BP_m1GO:004255superoxide    | 2/2606  | 30/23843  | 0.854846 | 0.902954 | 0.858612 | Fpr2/Ilgam |
| GO_BP_m1GO:004395positive reç  | 2/2606  | 30/23843  | 0.854846 | 0.902954 | 0.858612 | Adcyap1r1  |
| GO_BP_m1GO:004801neurotrophi   | 2/2606  | 30/23843  | 0.854846 | 0.902954 | 0.858612 | Bcar1/Ndn  |
| GO_BP_m1GO:005507potassium     | 2/2606  | 30/23843  | 0.854846 | 0.902954 | 0.858612 | Atp1b2/Slc |
| GO_BP_m1GO:007067response tr   | 2/2606  | 30/23843  | 0.854846 | 0.902954 | 0.858612 | Fasn/Jak3  |
| GO_BP_m1GO:190008positive reç  | 2/2606  | 30/23843  | 0.854846 | 0.902954 | 0.858612 | Cul4a/Mtbi |
| GO_BP_m1GO:190343regulation    | 2/2606  | 30/23843  | 0.854846 | 0.902954 | 0.858612 | Dgkq/Szt2  |
| GO_BP_m1GO:000833endosome      | 4/2606  | 54/23843  | 0.855541 | 0.903471 | 0.859103 | Cacng5/Ca  |
| GO_BP_m1GO:003501somatic ste   | 4/2606  | 54/23843  | 0.855541 | 0.903471 | 0.859103 | Cul4a/Nog  |
| GO_BP_m1GO:001032membrane      | 18/2606 | 203/23843 | 0.856374 | 0.904242 | 0.859836 | Cd36/Gsn/  |
| GO_BP_m1GO:001982stem cell p   | 14/2606 | 162/23843 | 0.857506 | 0.904383 | 0.85997  | Cdh2/Cul4. |
| GO_BP_m1GO:000641translation:  | 6/2606  | 77/23843  | 0.859482 | 0.904383 | 0.85997  | Abtb1/Cpe  |
| GO_BP_m1GO:000319epithelial tr | 1/2606  | 17/23843  | 0.860317 | 0.904383 | 0.85997  | Nog        |
| GO_BP_m1GO:000644regulation    | 1/2606  | 17/23843  | 0.860317 | 0.904383 | 0.85997  | Cpeb3      |
| GO_BP_m1GO:000696cellular def  | 1/2606  | 17/23843  | 0.860317 | 0.904383 | 0.85997  | Cd19       |
| GO_BP_m1GO:000914pyrimidine    | 1/2606  | 17/23843  | 0.860317 | 0.904383 | 0.85997  | Nme6       |
| GO_BP_m1GO:000921pyrimidine    | 1/2606  | 17/23843  | 0.860317 | 0.904383 | 0.85997  | Nme6       |
| GO_BP_m1GO:000988post-embr     | 1/2606  | 17/23843  | 0.860317 | 0.904383 | 0.85997  | Mir23a     |
| GO_BP_m1GO:001000cardioblast   | 1/2606  | 17/23843  | 0.860317 | 0.904383 | 0.85997  | Wnt3a      |
| GO_BP_m1GO:001083negative re   | 1/2606  | 17/23843  | 0.860317 | 0.904383 | 0.85997  | Cxcl10     |
| GO_BP_m1GO:003082regulation    | 1/2606  | 17/23843  | 0.860317 | 0.904383 | 0.85997  | Guca1a     |
| GO_BP_m1GO:003315V(D)J recor   | 1/2606  | 17/23843  | 0.860317 | 0.904383 | 0.85997  | Prkdc      |
| GO_BP_m1GO:003353fatty acid b  | 1/2606  | 17/23843  | 0.860317 | 0.904383 | 0.85997  | Acad11     |
| GO_BP_m1GO:003433cell junctio  | 1/2606  | 17/23843  | 0.860317 | 0.904383 | 0.85997  | 5730559C1  |
| GO_BP_m1GO:003447snRNA 3'-ε    | 1/2606  | 17/23843  | 0.860317 | 0.904383 | 0.85997  | Exosc9     |
| GO_BP_m1GO:003464establishm    | 1/2606  | 17/23843  | 0.860317 | 0.904383 | 0.85997  | Rhot2      |
| GO_BP_m1GO:003612cellular res  | 1/2606  | 17/23843  | 0.860317 | 0.904383 | 0.85997  | Has2       |
| GO_BP_m1GO:004215lipoprotein   | 1/2606  | 17/23843  | 0.860317 | 0.904383 | 0.85997  | Ppt1       |
| GO_BP_m1GO:004265regulation    | 1/2606  | 17/23843  | 0.860317 | 0.904383 | 0.85997  | Wnt3a      |
| GO_BP_m1GO:004327response tr   | 1/2606  | 17/23843  | 0.860317 | 0.904383 | 0.85997  | Drd3       |
| GO_BP_m1GO:004506T-helper 2    | 1/2606  | 17/23843  | 0.860317 | 0.904383 | 0.85997  | Zfp35      |
| GO_BP_m1GO:004579positive reç  | 1/2606  | 17/23843  | 0.860317 | 0.904383 | 0.85997  | Ogt        |
| GO_BP_m1GO:004613pyrimidine    | 1/2606  | 17/23843  | 0.860317 | 0.904383 | 0.85997  | Nme6       |
| GO_BP_m1GO:004618aldehyde b    | 1/2606  | 17/23843  | 0.860317 | 0.904383 | 0.85997  | Adh1       |
| GO_BP_m1GO:004634amino sugi    | 1/2606  | 17/23843  | 0.860317 | 0.904383 | 0.85997  | Chil5      |
| GO_BP_m1GO:004749mitochond     | 1/2606  | 17/23843  | 0.860317 | 0.904383 | 0.85997  | Rhot2      |
| GO_BP_m1GO:004849anterograd    | 1/2606  | 17/23843  | 0.860317 | 0.904383 | 0.85997  | Bloc1s5    |
| GO_BP_m1GO:006097cell migrati  | 1/2606  | 17/23843  | 0.860317 | 0.904383 | 0.85997  | Ndr4       |
| GO_BP_m1GO:007092regulation    | 1/2606  | 17/23843  | 0.860317 | 0.904383 | 0.85997  | Zc3h12a    |
| GO_BP_m1GO:007178endoplasm     | 1/2606  | 17/23843  | 0.860317 | 0.904383 | 0.85997  | Reep1      |
| GO_BP_m1GO:009023regulation    | 1/2606  | 17/23843  | 0.860317 | 0.904383 | 0.85997  | Tpr        |

|                                     |           |          |          |          |                |
|-------------------------------------|-----------|----------|----------|----------|----------------|
| GO_BP_m1GO:009951synaptic ve1/2606  | 17/23843  | 0.860317 | 0.904383 | 0.85997  | Bloc1s5        |
| GO_BP_m1GO:009951synaptic ve1/2606  | 17/23843  | 0.860317 | 0.904383 | 0.85997  | Bloc1s5        |
| GO_BP_m1GO:200035positive re1/2606  | 17/23843  | 0.860317 | 0.904383 | 0.85997  | Cd248          |
| GO_BP_m1GO:200077negative re1/2606  | 17/23843  | 0.860317 | 0.904383 | 0.85997  | Prkdc          |
| GO_BP_m1GO:200078positive re1/2606  | 17/23843  | 0.860317 | 0.904383 | 0.85997  | Blm            |
| GO_BP_m1GO:200081regulation 1/2606  | 17/23843  | 0.860317 | 0.904383 | 0.85997  | Cldn1          |
| GO_BP_m1GO:006147response tr5/2606  | 66/23843  | 0.861112 | 0.905003 | 0.860559 | Gnai1/Mir1     |
| GO_BP_m1GO:190303positive re5/2606  | 66/23843  | 0.861112 | 0.905003 | 0.860559 | Cd36/Fkbp      |
| GO_BP_m1GO:00149C myotube c3/2606   | 43/23843  | 0.86322  | 0.906892 | 0.862356 | Acta1/Gpx3     |
| GO_BP_m1GO:004682regulation 3/2606  | 43/23843  | 0.86322  | 0.906892 | 0.862356 | Cdk5/TprA      |
| GO_BP_m1GO:005091detection c3/2606  | 43/23843  | 0.86322  | 0.906892 | 0.862356 | Olfir371/Olfir |
| GO_BP_m1GO:001065striated m4/2606   | 55/23843  | 0.865208 | 0.908654 | 0.864032 | Bnip3/Cam      |
| GO_BP_m1GO:004269ovulation c4/2606  | 55/23843  | 0.865208 | 0.908654 | 0.864032 | Adamts1/A      |
| GO_BP_m1GO:004867response tr4/2606  | 55/23843  | 0.865208 | 0.908654 | 0.864032 | Fkbp1b/Klk     |
| GO_BP_m1GO:000236leukocyte e23/2606 | 256/23843 | 0.866709 | 0.909476 | 0.864814 | Anxa3/Aplf     |
| GO_BP_m1GO:003208negative re7/2606  | 89/23843  | 0.867023 | 0.909476 | 0.864814 | Cactin/Irak    |
| GO_BP_m1GO:003647cell death i7/2606 | 89/23843  | 0.867023 | 0.909476 | 0.864814 | Arl6ip5/Enc    |
| GO_BP_m1GO:000662protein tar2/2606  | 31/23843  | 0.867337 | 0.909476 | 0.864814 | Pik3r4/Zfyv    |
| GO_BP_m1GO:00086C attachment2/2606  | 31/23843  | 0.867337 | 0.909476 | 0.864814 | Cenpc1/Ra      |
| GO_BP_m1GO:001057regulation 2/2606  | 31/23843  | 0.867337 | 0.909476 | 0.864814 | Cxcl17/Ptg     |
| GO_BP_m1GO:001071positive re2/2606  | 31/23843  | 0.867337 | 0.909476 | 0.864814 | Ctgf/Mkx       |
| GO_BP_m1GO:003272positive re2/2606  | 31/23843  | 0.867337 | 0.909476 | 0.864814 | Polr3g/Ptp     |
| GO_BP_m1GO:003308regulation 2/2606  | 31/23843  | 0.867337 | 0.909476 | 0.864814 | Adam8/Il2r     |
| GO_BP_m1GO:003336secretory g2/2606  | 31/23843  | 0.867337 | 0.909476 | 0.864814 | Ccdc136/P      |
| GO_BP_m1GO:009016establishm2/2606   | 31/23843  | 0.867337 | 0.909476 | 0.864814 | Fbf1/Tcf15     |
| GO_BP_m1GO:190547negative re2/2606  | 31/23843  | 0.867337 | 0.909476 | 0.864814 | Itgb1bp1/C     |
| GO_BP_m1GO:200078positive re2/2606  | 31/23843  | 0.867337 | 0.909476 | 0.864814 | Kat2a/Kat2     |
| GO_BP_m1GO:190526positive re8/2606  | 100/23843 | 0.867518 | 0.909509 | 0.864844 | BC004004/      |
| GO_BP_m1GO:190374positive re6/2606  | 78/23843  | 0.867574 | 0.909509 | 0.864844 | Arih2/Kat2     |
| GO_BP_m1GO:000228lymphocyte16/2606  | 185/23843 | 0.870025 | 0.911866 | 0.867086 | Aplf/Dock1     |
| GO_BP_m1GO:001645gene silenc25/2606 | 277/23843 | 0.870031 | 0.911866 | 0.867086 | Apobec1/B      |
| GO_BP_m1GO:003192TOR signal10/2606  | 122/23843 | 0.870419 | 0.912165 | 0.86737  | Arntl/Dgkq     |
| GO_BP_m1GO:006161pri-miRNA3/2606    | 44/23843  | 0.873465 | 0.913122 | 0.86828  | Hdac2/Nfk      |
| GO_BP_m1GO:000206glandular e4/2606  | 56/23843  | 0.874314 | 0.913122 | 0.86828  | Arntl/Clock    |
| GO_BP_m1GO:000244leukocyte r43/2606 | 458/23843 | 0.874898 | 0.913122 | 0.86828  | Anxa3/Aplf     |
| GO_BP_m1GO:000171mesoderm.1/2606    | 18/23843  | 0.875595 | 0.913122 | 0.86828  | Wnt3a          |
| GO_BP_m1GO:000207osteoblast 1/2606  | 18/23843  | 0.875595 | 0.913122 | 0.86828  | Men1           |
| GO_BP_m1GO:000292positive re1/2606  | 18/23843  | 0.875595 | 0.913122 | 0.86828  | Ptpcr          |
| GO_BP_m1GO:000662protein tar1/2606  | 18/23843  | 0.875595 | 0.913122 | 0.86828  | Zfyve16        |
| GO_BP_m1GO:000719activation c1/2606 | 18/23843  | 0.875595 | 0.913122 | 0.86828  | Adcy4          |
| GO_BP_m1GO:000739ectoderm c1/2606   | 18/23843  | 0.875595 | 0.913122 | 0.86828  | Foxa2          |
| GO_BP_m1GO:001099response tr1/2606  | 18/23843  | 0.875595 | 0.913122 | 0.86828  | Abl2           |
| GO_BP_m1GO:001407response tr1/2606  | 18/23843  | 0.875595 | 0.913122 | 0.86828  | Drd3           |
| GO_BP_m1GO:001604detection c1/2606  | 18/23843  | 0.875595 | 0.913122 | 0.86828  | Nod1           |
| GO_BP_m1GO:001607rRNA catak1/2606   | 18/23843  | 0.875595 | 0.913122 | 0.86828  | Exosc9         |
| GO_BP_m1GO:001841C-terminal1/2606   | 18/23843  | 0.875595 | 0.913122 | 0.86828  | Wipi2          |
| GO_BP_m1GO:003227gonadotrop1/2606   | 18/23843  | 0.875595 | 0.913122 | 0.86828  | Tacr2          |
| GO_BP_m1GO:003243melanoson1/2606    | 18/23843  | 0.875595 | 0.913122 | 0.86828  | Rab32          |

|                                     |           |          |          |          |            |
|-------------------------------------|-----------|----------|----------|----------|------------|
| GO_BP_m1GO:003267regulation 1/2606  | 18/23843  | 0.875595 | 0.913122 | 0.86828  | Il1r1      |
| GO_BP_m1GO:003585megakaryo1/2606    | 18/23843  | 0.875595 | 0.913122 | 0.86828  | Abi1       |
| GO_BP_m1GO:003611response to1/2606  | 18/23843  | 0.875595 | 0.913122 | 0.86828  | Has2       |
| GO_BP_m1GO:003631response to1/2606  | 18/23843  | 0.875595 | 0.913122 | 0.86828  | Smo        |
| GO_BP_m1GO:004003negative re1/2606  | 18/23843  | 0.875595 | 0.913122 | 0.86828  | Shisa2     |
| GO_BP_m1GO:004221cellular mo1/2606  | 18/23843  | 0.875595 | 0.913122 | 0.86828  | Dio2       |
| GO_BP_m1GO:004271maternal b1/2606   | 18/23843  | 0.875595 | 0.913122 | 0.86828  | Avpr1a     |
| GO_BP_m1GO:004393ossification1/2606 | 18/23843  | 0.875595 | 0.913122 | 0.86828  | Rflna      |
| GO_BP_m1GO:004507regulation 1/2606  | 18/23843  | 0.875595 | 0.913122 | 0.86828  | Glmn       |
| GO_BP_m1GO:004595negative re1/2606  | 18/23843  | 0.875595 | 0.913122 | 0.86828  | Sh2d1b2    |
| GO_BP_m1GO:004671muscle cell1/2606  | 18/23843  | 0.875595 | 0.913122 | 0.86828  | Cav3       |
| GO_BP_m1GO:005506chloride io1/2606  | 18/23843  | 0.875595 | 0.913122 | 0.86828  | Slc12a2    |
| GO_BP_m1GO:006008auditory re1/2606  | 18/23843  | 0.875595 | 0.913122 | 0.86828  | Myo3a      |
| GO_BP_m1GO:006039regulation 1/2606  | 18/23843  | 0.875595 | 0.913122 | 0.86828  | Pbld1      |
| GO_BP_m1GO:006057morphoge1/2606     | 18/23843  | 0.875595 | 0.913122 | 0.86828  | Nog        |
| GO_BP_m1GO:006071spongiotro1/2606   | 18/23843  | 0.875595 | 0.913122 | 0.86828  | Adm        |
| GO_BP_m1GO:006084venous blo1/2606   | 18/23843  | 0.875595 | 0.913122 | 0.86828  | Ephb4      |
| GO_BP_m1GO:006094cardiac vas1/2606  | 18/23843  | 0.875595 | 0.913122 | 0.86828  | Smad6      |
| GO_BP_m1GO:007087positive re1/2606  | 18/23843  | 0.875595 | 0.913122 | 0.86828  | Esrb       |
| GO_BP_m1GO:009854detection c1/2606  | 18/23843  | 0.875595 | 0.913122 | 0.86828  | Nod1       |
| GO_BP_m1GO:009962ventricular 1/2606 | 18/23843  | 0.875595 | 0.913122 | 0.86828  | Cav3       |
| GO_BP_m1GO:190225negative re1/2606  | 18/23843  | 0.875595 | 0.913122 | 0.86828  | Park2      |
| GO_BP_m1GO:190285regulation 1/2606  | 18/23843  | 0.875595 | 0.913122 | 0.86828  | Tmem67     |
| GO_BP_m1GO:190442regulation 1/2606  | 18/23843  | 0.875595 | 0.913122 | 0.86828  | Arhgef7    |
| GO_BP_m1GO:19904Cembryonic 1/2606   | 18/23843  | 0.875595 | 0.913122 | 0.86828  | Cc2d2a     |
| GO_BP_m1GO:000725JAK-STAT c18/2606  | 207/23843 | 0.876581 | 0.914041 | 0.869154 | Cav1/Dcn/  |
| GO_BP_m1GO:00550Cstriated m15/2606  | 176/23843 | 0.877258 | 0.91464  | 0.869723 | Acta1/Akap |
| GO_BP_m1GO:004329leukocyte c5/2606  | 68/23843  | 0.877845 | 0.915034 | 0.870098 | Anxa3/Bcr/ |
| GO_BP_m1GO:004833mesoderm 5/2606    | 68/23843  | 0.877845 | 0.915034 | 0.870098 | Epha2/Foxo |
| GO_BP_m1GO:00003Espliceosom2/2606   | 32/23843  | 0.878832 | 0.915302 | 0.870353 | Prpf19/Prp |
| GO_BP_m1GO:002159ventricular 2/2606 | 32/23843  | 0.878832 | 0.915302 | 0.870353 | Kdm2b/Ulk  |
| GO_BP_m1GO:002261extracellula2/2606 | 32/23843  | 0.878832 | 0.915302 | 0.870353 | Fscn1/Kif9 |
| GO_BP_m1GO:004003regulation 2/2606  | 32/23843  | 0.878832 | 0.915302 | 0.870353 | Nog/Shisa2 |
| GO_BP_m1GO:006014regulation 2/2606  | 32/23843  | 0.878832 | 0.915302 | 0.870353 | Cxcl10/Scg |
| GO_BP_m1GO:006079cell fate co2/2606 | 32/23843  | 0.878832 | 0.915302 | 0.870353 | Sox2/Wnt3  |
| GO_BP_m1GO:008609regulation 2/2606  | 32/23843  | 0.878832 | 0.915302 | 0.870353 | Cacnb2/Ca  |
| GO_BP_m1GO:000282positive re8/2606  | 102/23843 | 0.881    | 0.917278 | 0.872232 | Fam49b/lfr |
| GO_BP_m1GO:00017Cin utero en42/2606 | 450/23843 | 0.881084 | 0.917278 | 0.872232 | Adm/B9d1.  |
| GO_BP_m1GO:003105positive re7/2606  | 91/23843  | 0.881251 | 0.917278 | 0.872232 | BC004004/  |
| GO_BP_m1GO:004544myoblast d7/2606   | 91/23843  | 0.881251 | 0.917278 | 0.872232 | Ankrd1/Cx  |
| GO_BP_m1GO:190374regulation 7/2606  | 91/23843  | 0.881251 | 0.917278 | 0.872232 | Arih2/Hsp  |
| GO_BP_m1GO:003519gene silenc10/2606 | 124/23843 | 0.882562 | 0.918461 | 0.873357 | Fmr1/Mael  |
| GO_BP_m1GO:00031Eoutflow tra6/2606  | 80/23843  | 0.882596 | 0.918461 | 0.873357 | Foxc1/Jag1 |
| GO_BP_m1GO:005131metaphase4/2606    | 57/23843  | 0.882883 | 0.918579 | 0.873469 | Ankrd53/C  |
| GO_BP_m1GO:006061adipose tis:3/2606 | 45/23843  | 0.883024 | 0.918579 | 0.873469 | Ap1s2/Ppa  |
| GO_BP_m1GO:00619Eestablishm:3/2606  | 45/23843  | 0.883024 | 0.918579 | 0.873469 | Arhgap44/  |
| GO_BP_m1GO:01100Eregulation 22/2606 | 250/23843 | 0.884906 | 0.920428 | 0.875227 | Cdc42ep5/  |
| GO_BP_m1GO:009769STAT casca18/2606  | 209/23843 | 0.885811 | 0.921068 | 0.875835 | Cav1/Dcn/  |



|                                      |           |          |          |          |             |
|--------------------------------------|-----------|----------|----------|----------|-------------|
| GO_BP_m1GO:000806regulation 15/2606  | 178/23843 | 0.887153 | 0.921068 | 0.875835 | Cdc42ep5/   |
| GO_BP_m1GO:200011negative re8/2606   | 103/23843 | 0.887303 | 0.921068 | 0.875835 | Cst6/Gpx1/  |
| GO_BP_m1GO:000815actin polyn17/2606  | 199/23843 | 0.887572 | 0.921068 | 0.875835 | Abi1/Cdc4:  |
| GO_BP_m1GO:003109regeneratio10/2606  | 125/23843 | 0.888276 | 0.921068 | 0.875835 | Adm/Cdk1.   |
| GO_BP_m1GO:001046negative re22/2606  | 251/23843 | 0.888984 | 0.921068 | 0.875835 | Col28a1/C:  |
| GO_BP_m1GO:000211store-oper1/2606    | 19/23843  | 0.889202 | 0.921068 | 0.875835 | Stim2       |
| GO_BP_m1GO:000218cytoplasmic1/2606   | 19/23843  | 0.889202 | 0.921068 | 0.875835 | Ythdf2      |
| GO_BP_m1GO:000271negative re1/2606   | 19/23843  | 0.889202 | 0.921068 | 0.875835 | Sh2d1b2     |
| GO_BP_m1GO:000321cardiac left1/2606  | 19/23843  | 0.889202 | 0.921068 | 0.875835 | Rnls        |
| GO_BP_m1GO:000754dosage cor1/2606    | 19/23843  | 0.889202 | 0.921068 | 0.875835 | H2afy       |
| GO_BP_m1GO:001044response tr1/2606   | 19/23843  | 0.889202 | 0.921068 | 0.875835 | Slc9a1      |
| GO_BP_m1GO:001084retina layer1/2606  | 19/23843  | 0.889202 | 0.921068 | 0.875835 | Foxn4       |
| GO_BP_m1GO:001824protein O-1/2606    | 19/23843  | 0.889202 | 0.921068 | 0.875835 | Galnt9      |
| GO_BP_m1GO:002169cerebellar f1/2606  | 19/23843  | 0.889202 | 0.921068 | 0.875835 | Cend1       |
| GO_BP_m1GO:003022platelet for1/2606  | 19/23843  | 0.889202 | 0.921068 | 0.875835 | Cib1        |
| GO_BP_m1GO:003085polarized e1/2606   | 19/23843  | 0.889202 | 0.921068 | 0.875835 | Tcf15       |
| GO_BP_m1GO:003221negative re1/2606   | 19/23843  | 0.889202 | 0.921068 | 0.875835 | Hnrnpc      |
| GO_BP_m1GO:003263interleukin-1/2606  | 19/23843  | 0.889202 | 0.921068 | 0.875835 | Il1rl1      |
| GO_BP_m1GO:003361mitochondr1/2606    | 19/23843  | 0.889202 | 0.921068 | 0.875835 | Smim20      |
| GO_BP_m1GO:003601protein loc1/2606   | 19/23843  | 0.889202 | 0.921068 | 0.875835 | Ezr         |
| GO_BP_m1GO:00454Cregulation 1/2606   | 19/23843  | 0.889202 | 0.921068 | 0.875835 | lfng        |
| GO_BP_m1GO:004875pigment gr1/2606    | 19/23843  | 0.889202 | 0.921068 | 0.875835 | Rab32       |
| GO_BP_m1GO:005102regulation 1/2606   | 19/23843  | 0.889202 | 0.921068 | 0.875835 | Stx4a       |
| GO_BP_m1GO:005165establishme1/2606   | 19/23843  | 0.889202 | 0.921068 | 0.875835 | Rhot2       |
| GO_BP_m1GO:007097bone matu1/2606     | 19/23843  | 0.889202 | 0.921068 | 0.875835 | Rflna       |
| GO_BP_m1GO:007214epithelial c1/2606  | 19/23843  | 0.889202 | 0.921068 | 0.875835 | Arx         |
| GO_BP_m1GO:009724amyloid-b1/2606     | 19/23843  | 0.889202 | 0.921068 | 0.875835 | Itgam       |
| GO_BP_m1GO:190001positive re1/2606   | 19/23843  | 0.889202 | 0.921068 | 0.875835 | Kars        |
| GO_BP_m1GO:190042regulation 1/2606   | 19/23843  | 0.889202 | 0.921068 | 0.875835 | Rab34       |
| GO_BP_m1GO:190305positive re1/2606   | 19/23843  | 0.889202 | 0.921068 | 0.875835 | Fscn1       |
| GO_BP_m1GO:190527regulation 1/2606   | 19/23843  | 0.889202 | 0.921068 | 0.875835 | Gdnf        |
| GO_BP_m1GO:200013regulation 1/2606   | 19/23843  | 0.889202 | 0.921068 | 0.875835 | Tbx1        |
| GO_BP_m1GO:001057vascular en2/2606   | 33/23843  | 0.889401 | 0.921068 | 0.875835 | Cxcl17/Ptg  |
| GO_BP_m1GO:002168cerebellar f2/2606  | 33/23843  | 0.889401 | 0.921068 | 0.875835 | Cend1/Sez   |
| GO_BP_m1GO:00430C Golgi to pl:2/2606 | 33/23843  | 0.889401 | 0.921068 | 0.875835 | Bbs2/Rab3   |
| GO_BP_m1GO:00434C skeletal m:2/2606  | 33/23843  | 0.889401 | 0.921068 | 0.875835 | Gpx1/Wnt7   |
| GO_BP_m1GO:004343negative re14/2606  | 168/23843 | 0.889698 | 0.921267 | 0.876025 | Cactin/Fox: |
| GO_BP_m1GO:000635DNA-temp:4/2606     | 58/23843  | 0.890939 | 0.922335 | 0.877041 | Btbd18/Ell2 |
| GO_BP_m1GO:004246photorecep:4/2606   | 58/23843  | 0.890939 | 0.922335 | 0.877041 | Fscn2/Th/T  |
| GO_BP_m1GO:003083regulation 15/2606  | 179/23843 | 0.891855 | 0.92282  | 0.877502 | Cdc42ep5/   |
| GO_BP_m1GO:001488striated m:3/2606   | 46/23843  | 0.891933 | 0.92282  | 0.877502 | Atp2b4/Gs   |
| GO_BP_m1GO:001819peptidyl-c:3/2606   | 46/23843  | 0.891933 | 0.92282  | 0.877502 | Adh5/Atp2   |
| GO_BP_m1GO:002177olfactory b 3/2606  | 46/23843  | 0.891933 | 0.92282  | 0.877502 | Arx/Mir141  |
| GO_BP_m1GO:007054response tr3/2606   | 46/23843  | 0.891933 | 0.92282  | 0.877502 | Cd36/Rank   |
| GO_BP_m1GO:002153diencephal5/2606    | 70/23843  | 0.892829 | 0.923529 | 0.878176 | Arx/Ncam1   |
| GO_BP_m1GO:004874muscle fibre5/2606  | 70/23843  | 0.892829 | 0.923529 | 0.878176 | Acta1/Gpx:  |
| GO_BP_m1GO:003295regulation 30/2606  | 334/23843 | 0.894573 | 0.925224 | 0.879787 | Arhgap44/   |
| GO_BP_m1GO:001095negative re17/2606  | 201/23843 | 0.896337 | 0.92694  | 0.881419 | Cst6/Fetub  |

|                                |         |           |          |          |          |             |
|--------------------------------|---------|-----------|----------|----------|----------|-------------|
| GO_BP_m1GO:003083regulation    | 13/2606 | 159/23843 | 0.897386 | 0.927915 | 0.882347 | Cdc42ep5/   |
| GO_BP_m1GO:001814peptide crc   | 4/2606  | 59/23843  | 0.898505 | 0.928596 | 0.882994 | Dcn/Lce3c/  |
| GO_BP_m1GO:006071labyrinthin   | 4/2606  | 59/23843  | 0.898505 | 0.928596 | 0.882994 | Adm/Gab1    |
| GO_BP_m1GO:003519posttranscr   | 10/2606 | 127/23843 | 0.899018 | 0.928596 | 0.882994 | Fmr1/Mael   |
| GO_BP_m1GO:000695compleme      | 14/2606 | 170/23843 | 0.899022 | 0.928596 | 0.882994 | C1rl/Ighv1- |
| GO_BP_m1GO:003004actin filam   | 14/2606 | 170/23843 | 0.899022 | 0.928596 | 0.882994 | Cdc42ep5/   |
| GO_BP_m1GO:004326negative re   | 2/2606  | 34/23843  | 0.899108 | 0.928596 | 0.882994 | Cav1/Cav3   |
| GO_BP_m1GO:005508monovalen     | 2/2606  | 34/23843  | 0.899108 | 0.928596 | 0.882994 | Rnls/Slc12a |
| GO_BP_m1GO:007087regulation    | 2/2606  | 34/23843  | 0.899108 | 0.928596 | 0.882994 | Esrrb/Ppp1  |
| GO_BP_m1GO:007139cellular res  | 2/2606  | 34/23843  | 0.899108 | 0.928596 | 0.882994 | Ranbp1/Zc   |
| GO_BP_m1GO:007238organelle t   | 5/2606  | 71/23843  | 0.899706 | 0.928596 | 0.882994 | Bloc1s5/Cc  |
| GO_BP_m1GO:004521sarcomere     | 3/2606  | 47/23843  | 0.900229 | 0.928596 | 0.882994 | Cav3/Hdac   |
| GO_BP_m1GO:000834determinat    | 1/2606  | 20/23843  | 0.901322 | 0.928596 | 0.882994 | Ercc5       |
| GO_BP_m1GO:001824protein O-    | 1/2606  | 20/23843  | 0.901322 | 0.928596 | 0.882994 | Galnt9      |
| GO_BP_m1GO:003106positive re   | 1/2606  | 20/23843  | 0.901322 | 0.928596 | 0.882994 | BC004004    |
| GO_BP_m1GO:003228myelin ass    | 1/2606  | 20/23843  | 0.901322 | 0.928596 | 0.882994 | Ahnak2      |
| GO_BP_m1GO:003233positive re   | 1/2606  | 20/23843  | 0.901322 | 0.928596 | 0.882994 | Por         |
| GO_BP_m1GO:003634platelet mc   | 1/2606  | 20/23843  | 0.901322 | 0.928596 | 0.882994 | Cib1        |
| GO_BP_m1GO:004209interleukin   | 1/2606  | 20/23843  | 0.901322 | 0.928596 | 0.882994 | Glmn        |
| GO_BP_m1GO:004222interleukin   | 1/2606  | 20/23843  | 0.901322 | 0.928596 | 0.882994 | lfng        |
| GO_BP_m1GO:004253tumor necr    | 1/2606  | 20/23843  | 0.901322 | 0.928596 | 0.882994 | Il10        |
| GO_BP_m1GO:004253regulation    | 1/2606  | 20/23843  | 0.901322 | 0.928596 | 0.882994 | Il10        |
| GO_BP_m1GO:004353skeletal mu   | 1/2606  | 20/23843  | 0.901322 | 0.928596 | 0.882994 | Myh7        |
| GO_BP_m1GO:004855embryonic     | 1/2606  | 20/23843  | 0.901322 | 0.928596 | 0.882994 | Pdgfra      |
| GO_BP_m1GO:005122cytoplasmic   | 1/2606  | 20/23843  | 0.901322 | 0.928596 | 0.882994 | Lats1       |
| GO_BP_m1GO:005181disruption    | 1/2606  | 20/23843  | 0.901322 | 0.928596 | 0.882994 | Arg1        |
| GO_BP_m1GO:005188killing of c  | 1/2606  | 20/23843  | 0.901322 | 0.928596 | 0.882994 | Arg1        |
| GO_BP_m1GO:005509response tr   | 1/2606  | 20/23843  | 0.901322 | 0.928596 | 0.882994 | Cd36        |
| GO_BP_m1GO:006132cell prolifer | 1/2606  | 20/23843  | 0.901322 | 0.928596 | 0.882994 | Tbx1        |
| GO_BP_m1GO:007171basement m    | 1/2606  | 20/23843  | 0.901322 | 0.928596 | 0.882994 | Flrt2       |
| GO_BP_m1GO:009878response tr   | 1/2606  | 20/23843  | 0.901322 | 0.928596 | 0.882994 | Park2       |
| GO_BP_m1GO:009962regulation    | 1/2606  | 20/23843  | 0.901322 | 0.928596 | 0.882994 | Cav3        |
| GO_BP_m1GO:005134negative re   | 36/2606 | 397/23843 | 0.902357 | 0.929554 | 0.883905 | Angptl3/Bc  |
| GO_BP_m1GO:000661protein exp   | 10/2606 | 128/23843 | 0.904058 | 0.931197 | 0.885467 | Calr/Cdk5/  |
| GO_BP_m1GO:000190cell killing  | 11/2606 | 139/23843 | 0.904542 | 0.931586 | 0.885837 | Arg1/Cadn   |
| GO_BP_m1GO:190211positive re   | 5/2606  | 72/23843  | 0.906197 | 0.933181 | 0.887354 | Cnot6l/Fsci |
| GO_BP_m1GO:002198olfactory lc  | 3/2606  | 48/23843  | 0.907945 | 0.934396 | 0.888509 | Arx/Mir141  |
| GO_BP_m1GO:009951vesicle cytc  | 3/2606  | 48/23843  | 0.907945 | 0.934396 | 0.888509 | Bloc1s5/Kif |
| GO_BP_m1GO:000682iron ion tra  | 2/2606  | 35/23843  | 0.908015 | 0.934396 | 0.888509 | Rep15/Slc4  |
| GO_BP_m1GO:004568positive re   | 2/2606  | 35/23843  | 0.908015 | 0.934396 | 0.888509 | Foxc1/H2a   |
| GO_BP_m1GO:007136cellular res  | 2/2606  | 35/23843  | 0.908015 | 0.934396 | 0.888509 | Cfl1/Foxc1  |
| GO_BP_m1GO:190274apoptotic r   | 2/2606  | 35/23843  | 0.908015 | 0.934396 | 0.888509 | Foxc1/Wt1   |
| GO_BP_m1GO:004583negative re   | 6/2606  | 84/23843  | 0.908347 | 0.934628 | 0.88873  | Adora1/Ap   |
| GO_BP_m1GO:000183epithelial tr | 10/2606 | 129/23843 | 0.908886 | 0.935073 | 0.889153 | Foxa2/Foxc  |
| GO_BP_m1GO:190382negative re   | 8/2606  | 107/23843 | 0.909796 | 0.9359   | 0.889939 | Cdk5/Cldn   |
| GO_BP_m1GO:003003contractile   | 7/2606  | 96/23843  | 0.911341 | 0.936204 | 0.890228 | Ctgf/Itgb1k |
| GO_BP_m1GO:004314stress fiber  | 7/2606  | 96/23843  | 0.911341 | 0.936204 | 0.890228 | Ctgf/Itgb1k |
| GO_BP_m1GO:000269positive re   | 1/2606  | 21/23843  | 0.912116 | 0.936204 | 0.890228 | Adam8       |

|                                     |           |          |          |          |             |
|-------------------------------------|-----------|----------|----------|----------|-------------|
| GO_BP_m1GO:001074regulation 1/2606  | 21/23843  | 0.912116 | 0.936204 | 0.890228 | Cd36        |
| GO_BP_m1GO:003193regulation 1/2606  | 21/23843  | 0.912116 | 0.936204 | 0.890228 | Apobec1     |
| GO_BP_m1GO:003233negative re1/2606  | 21/23843  | 0.912116 | 0.936204 | 0.890228 | Rflna       |
| GO_BP_m1GO:003246regulation 1/2606  | 21/23843  | 0.912116 | 0.936204 | 0.890228 | Pex5        |
| GO_BP_m1GO:003300positive re1/2606  | 21/23843  | 0.912116 | 0.936204 | 0.890228 | Ms4a2       |
| GO_BP_m1GO:003314positive re1/2606  | 21/23843  | 0.912116 | 0.936204 | 0.890228 | Pak1        |
| GO_BP_m1GO:004330positive re1/2606  | 21/23843  | 0.912116 | 0.936204 | 0.890228 | Ms4a2       |
| GO_BP_m1GO:004505transcytosi1/2606  | 21/23843  | 0.912116 | 0.936204 | 0.890228 | Rab5a       |
| GO_BP_m1GO:004506T-helper 1 1/2606  | 21/23843  | 0.912116 | 0.936204 | 0.890228 | Jak3        |
| GO_BP_m1GO:004568negative re1/2606  | 21/23843  | 0.912116 | 0.936204 | 0.890228 | Smo         |
| GO_BP_m1GO:004613pyrimidine 1/2606  | 21/23843  | 0.912116 | 0.936204 | 0.890228 | Nme6        |
| GO_BP_m1GO:005123sequesterir1/2606  | 21/23843  | 0.912116 | 0.936204 | 0.890228 | Slc30a3     |
| GO_BP_m1GO:005145myoblast p1/2606   | 21/23843  | 0.912116 | 0.936204 | 0.890228 | Gpx1        |
| GO_BP_m1GO:009028positive re1/2606  | 21/23843  | 0.912116 | 0.936204 | 0.890228 | Calcr       |
| GO_BP_m1GO:190174positive re1/2606  | 21/23843  | 0.912116 | 0.936204 | 0.890228 | Scgb3a1     |
| GO_BP_m1GO:200067negative re1/2606  | 21/23843  | 0.912116 | 0.936204 | 0.890228 | Zfp593      |
| GO_BP_m1GO:000245humoral ir15/2606  | 184/23843 | 0.913037 | 0.937039 | 0.891022 | C1rl/Ighv1- |
| GO_BP_m1GO:001406phosphatic9/2606   | 119/23843 | 0.913848 | 0.937652 | 0.891606 | Csf3/Dcn/E  |
| GO_BP_m1GO:004348regulation 9/2606  | 119/23843 | 0.913848 | 0.937652 | 0.891606 | Ahnak2/Fr   |
| GO_BP_m1GO:000244lymphocyte34/2606  | 381/23843 | 0.914253 | 0.937958 | 0.891897 | Aplf/Arg1/  |
| GO_BP_m1GO:000634chromatin 8/2606   | 108/23843 | 0.914782 | 0.938391 | 0.892308 | Apobec1/B   |
| GO_BP_m1GO:009748dendrite ex2/2606  | 36/23843  | 0.916181 | 0.939498 | 0.89336  | Cpne6/Parl  |
| GO_BP_m1GO:190470regulation 2/2606  | 36/23843  | 0.916181 | 0.939498 | 0.89336  | Il10/Pak1   |
| GO_BP_m1GO:199087vascular sn2/2606  | 36/23843  | 0.916181 | 0.939498 | 0.89336  | Il10/Pak1   |
| GO_BP_m1GO:004205regulation 4/2606  | 62/23843  | 0.918494 | 0.941759 | 0.895511 | Adora1/Gp   |
| GO_BP_m1GO:190321regulation 6/2606  | 86/23843  | 0.919282 | 0.942457 | 0.896175 | Arih2/Kat2: |
| GO_BP_m1GO:005160detection c43/2606 | 474/23843 | 0.919727 | 0.942804 | 0.896504 | Adora1/An   |
| GO_BP_m1GO:000218cytoplasmic7/2606  | 98/23843  | 0.921401 | 0.942986 | 0.896678 | Cpeb3/Cpe   |
| GO_BP_m1GO:000209auditory re1/2606  | 22/23843  | 0.92173  | 0.942986 | 0.896678 | Myo3a       |
| GO_BP_m1GO:000327endocardia1/2606   | 22/23843  | 0.92173  | 0.942986 | 0.896678 | Nog         |
| GO_BP_m1GO:003270negative re1/2606  | 22/23843  | 0.92173  | 0.942986 | 0.896678 | Ezr         |
| GO_BP_m1GO:003275positive re1/2606  | 22/23843  | 0.92173  | 0.942986 | 0.896678 | Sash3       |
| GO_BP_m1GO:003450tooth mine1/2606   | 22/23843  | 0.92173  | 0.942986 | 0.896678 | Tbx1        |
| GO_BP_m1GO:004349regulation 1/2606  | 22/23843  | 0.92173  | 0.942986 | 0.896678 | Trhr        |
| GO_BP_m1GO:004592negative re1/2606  | 22/23843  | 0.92173  | 0.942986 | 0.896678 | Plin5       |
| GO_BP_m1GO:005160response tr1/2606  | 22/23843  | 0.92173  | 0.942986 | 0.896678 | Cdk2        |
| GO_BP_m1GO:005179regulation 1/2606  | 22/23843  | 0.92173  | 0.942986 | 0.896678 | Smo         |
| GO_BP_m1GO:006043trachea de1/2606   | 22/23843  | 0.92173  | 0.942986 | 0.896678 | Ano1        |
| GO_BP_m1GO:006060branch elo1/2606   | 22/23843  | 0.92173  | 0.942986 | 0.896678 | Fgf1        |
| GO_BP_m1GO:006074mammary 1/2606     | 22/23843  | 0.92173  | 0.942986 | 0.896678 | Tnfsf11     |
| GO_BP_m1GO:006137mammary 1/2606     | 22/23843  | 0.92173  | 0.942986 | 0.896678 | Tnfsf11     |
| GO_BP_m1GO:007140cellular res1/2606 | 22/23843  | 0.92173  | 0.942986 | 0.896678 | Cd36        |
| GO_BP_m1GO:007198multivesicu1/2606  | 22/23843  | 0.92173  | 0.942986 | 0.896678 | Rab27b      |
| GO_BP_m1GO:007253T-helper 1 1/2606  | 22/23843  | 0.92173  | 0.942986 | 0.896678 | Smad7       |
| GO_BP_m1GO:009887vesicle-me 5/2606  | 75/23843  | 0.923514 | 0.944193 | 0.897825 | Arhgap44/   |
| GO_BP_m1GO:000037RNA splicir20/2606 | 240/23843 | 0.923655 | 0.944193 | 0.897825 | Fmr1/Hmx:   |
| GO_BP_m1GO:000039mRNA splic20/2606  | 240/23843 | 0.923655 | 0.944193 | 0.897825 | Fmr1/Hmx:   |
| GO_BP_m1GO:002188forebrain n2/2606  | 37/23843  | 0.923662 | 0.944193 | 0.897825 | Arx/Rac3    |

|                                       |           |          |          |          |              |
|---------------------------------------|-----------|----------|----------|----------|--------------|
| GO_BP_m1GO:00382C TORC1 sigr2/2606    | 37/23843  | 0.923662 | 0.944193 | 0.897825 | Dgkq/Szt2    |
| GO_BP_m1GO:00457C positive reç2/2606  | 37/23843  | 0.923662 | 0.944193 | 0.897825 | Ccnl1/Stil   |
| GO_BP_m1GO:00711E positive reç2/2606  | 37/23843  | 0.923662 | 0.944193 | 0.897825 | Cdkn1a/Rp    |
| GO_BP_m1GO:00069E complemei15/2606    | 187/23843 | 0.924009 | 0.944437 | 0.898057 | C1rl/Cfd/Ig  |
| GO_BP_m1GO:003307T cell differ6/2606  | 87/23843  | 0.924309 | 0.944634 | 0.898244 | Adam8/Il2r   |
| GO_BP_m1GO:00510C regulation 34/2606  | 385/23843 | 0.924589 | 0.94481  | 0.898412 | Abra/Adan    |
| GO_BP_m1GO:000037RNA splicir20/2606   | 241/23843 | 0.926691 | 0.946848 | 0.90035  | Fmr1/Hmx     |
| GO_BP_m1GO:00064C mRNA expr3/2606     | 51/23843  | 0.927952 | 0.947695 | 0.901155 | Ddx19b/Sa    |
| GO_BP_m1GO:00309C midbrain d3/2606    | 51/23843  | 0.927952 | 0.947695 | 0.901155 | Kat2a/Kdm    |
| GO_BP_m1GO:00456C regulation 3/2606   | 51/23843  | 0.927952 | 0.947695 | 0.901155 | Foxc1/H2a    |
| GO_BP_m1GO:00714C mRNA-cor3/2606      | 51/23843  | 0.927952 | 0.947695 | 0.901155 | Ddx19b/Sa    |
| GO_BP_m1GO:00329E collagen m6/2606    | 88/23843  | 0.929058 | 0.948715 | 0.902125 | Arg1/Col5a   |
| GO_BP_m1GO:00650C protein-D14/2606    | 178/23843 | 0.930078 | 0.949204 | 0.90259  | Cand1/Cer    |
| GO_BP_m1GO:00029C negative re1/2606   | 23/23843  | 0.930293 | 0.949204 | 0.90259  | Mir18b       |
| GO_BP_m1GO:00109E positive reç1/2606  | 23/23843  | 0.930293 | 0.949204 | 0.90259  | Gsn          |
| GO_BP_m1GO:00324E positive reç1/2606  | 23/23843  | 0.930293 | 0.949204 | 0.90259  | Snx9         |
| GO_BP_m1GO:00487C animal org.1/2606   | 23/23843  | 0.930293 | 0.949204 | 0.90259  | Rflna        |
| GO_BP_m1GO:009034negative re1/2606    | 23/23843  | 0.930293 | 0.949204 | 0.90259  | Prkdc        |
| GO_BP_m1GO:19047C positive reç1/2606  | 23/23843  | 0.930293 | 0.949204 | 0.90259  | Pak1         |
| GO_BP_m1GO:009717ruffle asser2/2606   | 38/23843  | 0.93051  | 0.949204 | 0.90259  | Cav1/Dbnl    |
| GO_BP_m1GO:19028C positive reç2/2606  | 38/23843  | 0.93051  | 0.949204 | 0.90259  | Cul4a/Mtbj   |
| GO_BP_m1GO:00420E cytokine bi8/2606   | 112/23843 | 0.932429 | 0.950941 | 0.904241 | Ccl20/Cebp   |
| GO_BP_m1GO:004581negative re8/2606    | 112/23843 | 0.932429 | 0.950941 | 0.904241 | Apobec1/B    |
| GO_BP_m1GO:00106E negative re3/2606   | 52/23843  | 0.933677 | 0.951993 | 0.905242 | Alox12/Cav   |
| GO_BP_m1GO:00308E prostate gl3/2606   | 52/23843  | 0.933677 | 0.951993 | 0.905242 | Nog/Plag1    |
| GO_BP_m1GO:00066C protein tarç27/2606 | 317/23843 | 0.934234 | 0.95245  | 0.905677 | Adora1/Ari   |
| GO_BP_m1GO:00219E pituitary gl.2/2606 | 39/23843  | 0.936773 | 0.954707 | 0.907823 | Nog/Sox2     |
| GO_BP_m1GO:003164killing of cç2/2606  | 39/23843  | 0.936773 | 0.954707 | 0.907823 | Arg1/Ifnç    |
| GO_BP_m1GO:00443E disruption 2/2606   | 39/23843  | 0.936773 | 0.954707 | 0.907823 | Arg1/Ifnç    |
| GO_BP_m1GO:000637mRNA splic1/2606     | 24/23843  | 0.937919 | 0.954877 | 0.907985 | Psip1        |
| GO_BP_m1GO:00157C bicarbonat.1/2606   | 24/23843  | 0.937919 | 0.954877 | 0.907985 | Slc26a7      |
| GO_BP_m1GO:00162E O-glycan ç1/2606    | 24/23843  | 0.937919 | 0.954877 | 0.907985 | Galnt9       |
| GO_BP_m1GO:003057collagen cç1/2606    | 24/23843  | 0.937919 | 0.954877 | 0.907985 | Mmp14        |
| GO_BP_m1GO:004504protein tarç1/2606   | 24/23843  | 0.937919 | 0.954877 | 0.907985 | Folr2        |
| GO_BP_m1GO:005157regulation 1/2606    | 24/23843  | 0.937919 | 0.954877 | 0.907985 | Dmrtc2       |
| GO_BP_m1GO:19022C negative re1/2606   | 24/23843  | 0.937919 | 0.954877 | 0.907985 | Pgap2        |
| GO_BP_m1GO:19044E regulation 1/2606   | 24/23843  | 0.937919 | 0.954877 | 0.907985 | Zc3h12a      |
| GO_BP_m1GO:199077tumor necr1/2606     | 24/23843  | 0.937919 | 0.954877 | 0.907985 | Zc3h12a      |
| GO_BP_m1GO:000994anterior/pc3/2606    | 53/23843  | 0.938981 | 0.955626 | 0.908697 | Foxa2/Pgaç   |
| GO_BP_m1GO:00443E protein loc3/2606   | 53/23843  | 0.938981 | 0.955626 | 0.908697 | Klhl21/Stil/ |
| GO_BP_m1GO:004854digestive tr3/2606   | 53/23843  | 0.938981 | 0.955626 | 0.908697 | Cfc1/Ephbç   |
| GO_BP_m1GO:00705E protein loc12/2606  | 159/23843 | 0.939457 | 0.955964 | 0.909018 | Arih2/Grpe   |
| GO_BP_m1GO:00140E positive reç4/2606  | 66/23843  | 0.939639 | 0.955964 | 0.909018 | Csf3/Dcn/    |
| GO_BP_m1GO:19011E regulation 4/2606   | 66/23843  | 0.939639 | 0.955964 | 0.909018 | Adora1/Gp    |
| GO_BP_m1GO:00024E adaptive in34/2606  | 393/23843 | 0.942213 | 0.958472 | 0.911403 | Aplf/Arg1/   |
| GO_BP_m1GO:00105E regulation 2/2606   | 40/23843  | 0.942498 | 0.958651 | 0.911573 | Jak3/Mt3     |
| GO_BP_m1GO:00711C DNA confo16/2606    | 204/23843 | 0.94283  | 0.958877 | 0.911788 | Bahd1/Blm    |
| GO_BP_m1GO:000721gamma-an1/2606       | 25/23843  | 0.944711 | 0.959568 | 0.912445 | Gabra6       |

|                                |          |           |          |          |          |             |
|--------------------------------|----------|-----------|----------|----------|----------|-------------|
| GO_BP_m1GO:001074macrophag     | 1/2606   | 25/23843  | 0.944711 | 0.959568 | 0.912445 | Cd36        |
| GO_BP_m1GO:001089negative re   | 1/2606   | 25/23843  | 0.944711 | 0.959568 | 0.912445 | Nfkb1       |
| GO_BP_m1GO:004593negative re   | 1/2606   | 25/23843  | 0.944711 | 0.959568 | 0.912445 | Nfkb1       |
| GO_BP_m1GO:00483Cimmunogl      | 1/2606   | 25/23843  | 0.944711 | 0.959568 | 0.912445 | Stx4a       |
| GO_BP_m1GO:005149negative re   | 1/2606   | 25/23843  | 0.944711 | 0.959568 | 0.912445 | Kank2       |
| GO_BP_m1GO:006076regulation    | 1/2606   | 25/23843  | 0.944711 | 0.959568 | 0.912445 | Hdac1       |
| GO_BP_m1GO:007253T-helper 1    | 1/2606   | 25/23843  | 0.944711 | 0.959568 | 0.912445 | Smad7       |
| GO_BP_m1GO:008601cell-cell sig | 1/2606   | 25/23843  | 0.944711 | 0.959568 | 0.912445 | Cacnb2      |
| GO_BP_m1GO:009962cardiac mu    | 1/2606   | 25/23843  | 0.944711 | 0.959568 | 0.912445 | Cav3        |
| GO_BP_m1GO:190331positive re   | 1/2606   | 25/23843  | 0.944711 | 0.959568 | 0.912445 | Gsn         |
| GO_BP_m1GO:000004autophago     | 6/2606   | 92/23843  | 0.945524 | 0.960282 | 0.913124 | Atg2a/Ift8E |
| GO_BP_m1GO:00421Ccytokine m    | 8/2606   | 116/23843 | 0.946798 | 0.961466 | 0.91425  | Ccl20/Cebp  |
| GO_BP_m1GO:00101Cpotassium     | 2/2606   | 41/23843  | 0.947728 | 0.962187 | 0.914936 | Atp1b2/Slc  |
| GO_BP_m1GO:003296regulation    | 2/2606   | 41/23843  | 0.947728 | 0.962187 | 0.914936 | Ctgf/Mkx    |
| GO_BP_m1GO:003009lymphocy      | 33/2606  | 386/23843 | 0.948476 | 0.962836 | 0.915552 | Abl2/Adar   |
| GO_BP_m1GO:000662protein tar   | 10/2606  | 140/23843 | 0.949748 | 0.964015 | 0.916674 | Arih2/Grpe  |
| GO_BP_m1GO:003106regulation    | 1/2606   | 26/23843  | 0.950761 | 0.964152 | 0.916804 | BC004004    |
| GO_BP_m1GO:00325C DNA duple    | 1/2606   | 26/23843  | 0.950761 | 0.964152 | 0.916804 | Blm         |
| GO_BP_m1GO:003323regulation    | 1/2606   | 26/23843  | 0.950761 | 0.964152 | 0.916804 | Hmg20a      |
| GO_BP_m1GO:004506thymic T      | ce1/2606 | 26/23843  | 0.950761 | 0.964152 | 0.916804 | Ptpcr       |
| GO_BP_m1GO:00451Cintermedia    | 1/2606   | 26/23843  | 0.950761 | 0.964152 | 0.916804 | Des         |
| GO_BP_m1GO:00603Einnervation   | 1/2606   | 26/23843  | 0.950761 | 0.964152 | 0.916804 | Ntf5        |
| GO_BP_m1GO:006071labyrinthin   | 1/2606   | 26/23843  | 0.950761 | 0.964152 | 0.916804 | Hs6st1      |
| GO_BP_m1GO:009007foam cell d   | 1/2606   | 26/23843  | 0.950761 | 0.964152 | 0.916804 | Cd36        |
| GO_BP_m1GO:00003Eregulation    | 2/2606   | 42/23843  | 0.952502 | 0.965706 | 0.918282 | Fmr1/Rbm1   |
| GO_BP_m1GO:00017Eeye photor    | 3/2606   | 56/23843  | 0.952623 | 0.965706 | 0.918282 | Fscn2/Th/T  |
| GO_BP_m1GO:000222innate imr    | 3/2606   | 56/23843  | 0.952623 | 0.965706 | 0.918282 | Defa29/De   |
| GO_BP_m1GO:001606immunogl      | 20/2606  | 253/23843 | 0.95589  | 0.968832 | 0.921254 | Aplf/C1rl/I |
| GO_BP_m1GO:004566positive re   | 1/2606   | 27/23843  | 0.956148 | 0.968832 | 0.921254 | Igfbp3      |
| GO_BP_m1GO:006014positive re   | 1/2606   | 27/23843  | 0.956148 | 0.968832 | 0.921254 | Scgb3a1     |
| GO_BP_m1GO:007163regulation    | 1/2606   | 27/23843  | 0.956148 | 0.968832 | 0.921254 | Ptgs2       |
| GO_BP_m1GO:000156branching     | 2/2606   | 43/23843  | 0.956857 | 0.968991 | 0.921406 | Dll4/Tbx1   |
| GO_BP_m1GO:00017Ccell fate de  | 2/2606   | 43/23843  | 0.956857 | 0.968991 | 0.921406 | Ntf5/Wnt7   |
| GO_BP_m1GO:000762adult walki   | 2/2606   | 43/23843  | 0.956857 | 0.968991 | 0.921406 | Abl2/Cend   |
| GO_BP_m1GO:00451Eestablishm    | 2/2606   | 43/23843  | 0.956857 | 0.968991 | 0.921406 | Lrrd1/Tcf1E |
| GO_BP_m1GO:006164histone H3    | 2/2606   | 43/23843  | 0.956857 | 0.968991 | 0.921406 | Dmrtc2/Ka   |
| GO_BP_m1GO:190503autophago     | 6/2606   | 96/23843  | 0.958476 | 0.970519 | 0.922858 | Atg2a/Ift8E |
| GO_BP_m1GO:00726Eestablishm    | 11/2606  | 155/23843 | 0.958894 | 0.97083  | 0.923154 | Arih2/Grpe  |
| GO_BP_m1GO:007237protein act   | 15/2606  | 200/23843 | 0.959036 | 0.970863 | 0.923185 | C1rl/Cfd/Ig |
| GO_BP_m1GO:001972B cell medi   | 20/2606  | 255/23843 | 0.95962  | 0.971118 | 0.923428 | Aplf/C1rl/I |
| GO_BP_m1GO:001983cytolysis     | 2/2606   | 44/23843  | 0.960828 | 0.971118 | 0.923428 | Gsdmd/Lyz   |
| GO_BP_m1GO:00451Cintermedia    | 2/2606   | 44/23843  | 0.960828 | 0.971118 | 0.923428 | Des/Sync    |
| GO_BP_m1GO:00906Ewalking be    | 2/2606   | 44/23843  | 0.960828 | 0.971118 | 0.923428 | Abl2/Cend   |
| GO_BP_m1GO:000633DNA replic    | 1/2606   | 28/23843  | 0.960947 | 0.971118 | 0.923428 | Hat1        |
| GO_BP_m1GO:00159EATP hydrol    | 1/2606   | 28/23843  | 0.960947 | 0.971118 | 0.923428 | Atp6v0c     |
| GO_BP_m1GO:003267regulation    | 1/2606   | 28/23843  | 0.960947 | 0.971118 | 0.923428 | Sash3       |
| GO_BP_m1GO:004574positive re   | 1/2606   | 28/23843  | 0.960947 | 0.971118 | 0.923428 | Adora1      |
| GO_BP_m1GO:00716Ctransformir   | 1/2606   | 28/23843  | 0.960947 | 0.971118 | 0.923428 | Ptgs2       |

|                                         |         |           |          |          |          |                 |
|-----------------------------------------|---------|-----------|----------|----------|----------|-----------------|
| GO_BP_m1GO:007259establishment          | 1/2606  | 28/23843  | 0.960947 | 0.971118 | 0.923428 | Folr2           |
| GO_BP_m1GO:009066ATP hydrolysis         | 1/2606  | 28/23843  | 0.960947 | 0.971118 | 0.923428 | Atp6v0c         |
| GO_BP_m1GO:009913ATP hydrolysis         | 1/2606  | 28/23843  | 0.960947 | 0.971118 | 0.923428 | Atp6v0c         |
| GO_BP_m1GO:009913ATP hydrolysis         | 1/2606  | 28/23843  | 0.960947 | 0.971118 | 0.923428 | Atp6v0c         |
| GO_BP_m1GO:190002regulation             | 1/2606  | 28/23843  | 0.960947 | 0.971118 | 0.923428 | Cav1            |
| GO_BP_m1GO:190225regulation             | 1/2606  | 28/23843  | 0.960947 | 0.971118 | 0.923428 | Park2           |
| GO_BP_m1GO:006039SMAD protein           | 5/2606  | 85/23843  | 0.962526 | 0.972601 | 0.924839 | Bmp3/Gdf1       |
| GO_BP_m1GO:000182blastocyst             | 6/2606  | 98/23843  | 0.963842 | 0.973708 | 0.92589  | Cdh1/Esrrb      |
| GO_BP_m1GO:004642positive regulation    | 6/2606  | 98/23843  | 0.963842 | 0.973708 | 0.92589  | Hdac1/Hdac2     |
| GO_BP_m1GO:190301regulation             | 2/2606  | 45/23843  | 0.964447 | 0.974207 | 0.926365 | Jak3/Mt3        |
| GO_BP_m1GO:000820bile acid metabolism   | 1/2606  | 29/23843  | 0.96522  | 0.974316 | 0.926468 | Atp8b1          |
| GO_BP_m1GO:001080positive regulation    | 1/2606  | 29/23843  | 0.96522  | 0.974316 | 0.926468 | Stox1           |
| GO_BP_m1GO:003472DNA replication        | 1/2606  | 29/23843  | 0.96522  | 0.974316 | 0.926468 | Hat1            |
| GO_BP_m1GO:004317peptide catabolism     | 1/2606  | 29/23843  | 0.96522  | 0.974316 | 0.926468 | Lvrn            |
| GO_BP_m1GO:006103positive regulation    | 1/2606  | 29/23843  | 0.96522  | 0.974316 | 0.926468 | Por             |
| GO_BP_m1GO:190179negative regulation    | 1/2606  | 29/23843  | 0.96522  | 0.974316 | 0.926468 | Park2           |
| GO_BP_m1GO:004203regulation             | 6/2606  | 99/23843  | 0.96628  | 0.975274 | 0.927379 | Ccl20/Glmi1     |
| GO_BP_m1GO:000759lactation              | 3/2606  | 60/23843  | 0.966412 | 0.975295 | 0.9274   | Aprt/Atp7b      |
| GO_BP_m1GO:004002regulation             | 23/2606 | 292/23843 | 0.96699  | 0.975765 | 0.927847 | Apobec1/ApoE    |
| GO_BP_m1GO:001973antibacterial          | 4/2606  | 74/23843  | 0.967682 | 0.976189 | 0.92825  | Defa29/Defa3    |
| GO_BP_m1GO:001071regulation             | 2/2606  | 46/23843  | 0.967743 | 0.976189 | 0.92825  | Ctgf/Mkx        |
| GO_BP_m1GO:007269protein localization   | 2/2606  | 46/23843  | 0.967743 | 0.976189 | 0.92825  | Stil/Ttk        |
| GO_BP_m1GO:003425positive regulation    | 9/2606  | 136/23843 | 0.967861 | 0.976196 | 0.928256 | Cpeb3/Csn1      |
| GO_BP_m1GO:000633chromatin              | 10/2606 | 148/23843 | 0.968333 | 0.97656  | 0.928603 | Bahd1/Cenpa     |
| GO_BP_m1GO:190489positive regulation    | 6/2606  | 100/23843 | 0.968567 | 0.976684 | 0.92872  | Hdac1/Hdac2     |
| GO_BP_m1GO:000320endocardium            | 1/2606  | 30/23843  | 0.969026 | 0.976698 | 0.928734 | Nog             |
| GO_BP_m1GO:006056apoptotic process      | 1/2606  | 30/23843  | 0.969026 | 0.976698 | 0.928734 | Foxc1           |
| GO_BP_m1GO:007153protein localization   | 1/2606  | 30/23843  | 0.969026 | 0.976698 | 0.928734 | Stil            |
| GO_BP_m1GO:190118positive regulation    | 1/2606  | 30/23843  | 0.969026 | 0.976698 | 0.928734 | Adora1          |
| GO_BP_m1GO:003149chromatin              | 8/2606  | 125/23843 | 0.969669 | 0.977231 | 0.92924  | Bahd1/Cenpa     |
| GO_BP_m1GO:003472nucleosome             | 9/2606  | 137/23843 | 0.969777 | 0.977231 | 0.92924  | Cenpa/H2afv     |
| GO_BP_m1GO:004568regulation             | 4/2606  | 75/23843  | 0.97017  | 0.977515 | 0.929511 | Foxc1/H2afv     |
| GO_BP_m1GO:001657histone ubiquitination | 2/2606  | 47/23843  | 0.970744 | 0.977756 | 0.92974  | Kdm2b/Rim2      |
| GO_BP_m1GO:004224tissue reorganization  | 2/2606  | 47/23843  | 0.970744 | 0.977756 | 0.92974  | Gpx1/Wnt7b      |
| GO_BP_m1GO:005105negative regulation    | 2/2606  | 47/23843  | 0.970744 | 0.977756 | 0.92974  | Nfkb1/Pdgfra    |
| GO_BP_m1GO:000340neural retina          | 3/2606  | 62/23843  | 0.971792 | 0.978319 | 0.930275 | Dll4/Foxn4      |
| GO_BP_m1GO:005186protein autophagy      | 3/2606  | 62/23843  | 0.971792 | 0.978319 | 0.930275 | Park2/Rnf1      |
| GO_BP_m1GO:006004retina morphogenesis   | 3/2606  | 62/23843  | 0.971792 | 0.978319 | 0.930275 | Foxn4/Nes       |
| GO_BP_m1GO:001406regulation             | 5/2606  | 89/23843  | 0.972186 | 0.978319 | 0.930275 | Csf3/Dcn/Notch1 |
| GO_BP_m1GO:000308regulation             | 1/2606  | 31/23843  | 0.972416 | 0.978319 | 0.930275 | Drd3            |
| GO_BP_m1GO:000633DNA replication        | 1/2606  | 31/23843  | 0.972416 | 0.978319 | 0.930275 | Hat1            |
| GO_BP_m1GO:001598energy coupling        | 1/2606  | 31/23843  | 0.972416 | 0.978319 | 0.930275 | Atp6v0c         |
| GO_BP_m1GO:003239DNA genome             | 1/2606  | 31/23843  | 0.972416 | 0.978319 | 0.930275 | Blm             |
| GO_BP_m1GO:003472DNA replication        | 1/2606  | 31/23843  | 0.972416 | 0.978319 | 0.930275 | Hat1            |
| GO_BP_m1GO:190550protein localization   | 1/2606  | 31/23843  | 0.972416 | 0.978319 | 0.930275 | Stil            |
| GO_BP_m1GO:001086positive regulation    | 2/2606  | 48/23843  | 0.973474 | 0.979271 | 0.931181 | Bmp3/Gdf1       |
| GO_BP_m1GO:004210positive regulation    | 3/2606  | 63/23843  | 0.974166 | 0.979855 | 0.931736 | Ccl20/Glmi1     |
| GO_BP_m1GO:000695humoral immunity       | 28/2606 | 352/23843 | 0.974659 | 0.980238 | 0.9321   | C1rl/Cfd/D      |

|                                      |           |          |          |          |            |
|--------------------------------------|-----------|----------|----------|----------|------------|
| GO_BP_m1GO:000635regulation 1/2606   | 32/23843  | 0.975435 | 0.980646 | 0.932488 | H2afy      |
| GO_BP_m1GO:001045regulation 1/2606   | 32/23843  | 0.975435 | 0.980646 | 0.932488 | Wnt3a      |
| GO_BP_m1GO:006048lung epithel1/2606  | 32/23843  | 0.975435 | 0.980646 | 0.932488 | Foxa2      |
| GO_BP_m1GO:000244mast cell nr2/2606  | 49/23843  | 0.975957 | 0.980646 | 0.932488 | Ms4a2/Spc  |
| GO_BP_m1GO:003152ruffle organ2/2606  | 49/23843  | 0.975957 | 0.980646 | 0.932488 | Cav1/Dbnl  |
| GO_BP_m1GO:00330Cregulation 2/2606   | 49/23843  | 0.975957 | 0.980646 | 0.932488 | Cd300lb/N  |
| GO_BP_m1GO:004501actin nucle 2/2606  | 49/23843  | 0.975957 | 0.980646 | 0.932488 | Gsn/Wipf1  |
| GO_BP_m1GO:006042lung epithel2/2606  | 49/23843  | 0.975957 | 0.980646 | 0.932488 | Fgf7/Foxa2 |
| GO_BP_m1GO:004653photorecep4/2606    | 78/23843  | 0.976601 | 0.981181 | 0.932997 | Fscn2/Th/T |
| GO_BP_m1GO:004572positive rec7/2606  | 117/23843 | 0.977089 | 0.981559 | 0.933356 | Cpeb3/Fmi  |
| GO_BP_m1GO:001834protein pal1/2606   | 33/23843  | 0.978123 | 0.982016 | 0.933791 | Map6d1     |
| GO_BP_m1GO:004852positive rec1/2606  | 33/23843  | 0.978123 | 0.982016 | 0.933791 | Uts2r      |
| GO_BP_m1GO:004856embryonic 1/2606    | 33/23843  | 0.978123 | 0.982016 | 0.933791 | Pdgfra     |
| GO_BP_m1GO:006047lung cell di1/2606  | 33/23843  | 0.978123 | 0.982016 | 0.933791 | Foxa2      |
| GO_BP_m1GO:006074prostate gl1/2606   | 33/23843  | 0.978123 | 0.982016 | 0.933791 | Nog        |
| GO_BP_m1GO:000689Golgi to pl;2/2606  | 50/23843  | 0.978215 | 0.982016 | 0.933791 | Bbs2/Rab3  |
| GO_BP_m1GO:005156histone H3 1/2606   | 34/23843  | 0.980518 | 0.984103 | 0.935775 | Dmrtc2     |
| GO_BP_m1GO:006051prostate gl1/2606   | 34/23843  | 0.980518 | 0.984103 | 0.935775 | Nog        |
| GO_BP_m1GO:000633nucleosom6/2606     | 107/23843 | 0.980984 | 0.984346 | 0.936006 | Cenpa/H2a  |
| GO_BP_m1GO:00901Cpositive rec6/2606  | 107/23843 | 0.980984 | 0.984346 | 0.936006 | Bmp3/Ficn  |
| GO_BP_m1GO:003263interleukin 1/2606  | 35/23843  | 0.98265  | 0.98568  | 0.937275 | Sash3      |
| GO_BP_m1GO:00330Cregulation 1/2606   | 35/23843  | 0.98265  | 0.98568  | 0.937275 | Ms4a2      |
| GO_BP_m1GO:00433Cregulation 1/2606   | 35/23843  | 0.98265  | 0.98568  | 0.937275 | Ms4a2      |
| GO_BP_m1GO:000238mucosal ir3/2606    | 68/23843  | 0.983446 | 0.986253 | 0.937819 | Defa29/De  |
| GO_BP_m1GO:004557mast cell ar3/2606  | 68/23843  | 0.983446 | 0.986253 | 0.937819 | Cd300lb/N  |
| GO_BP_m1GO:004336positive T c1/2606  | 36/23843  | 0.984549 | 0.987247 | 0.938764 | Ptpcr      |
| GO_BP_m1GO:000225organ or ti;3/2606  | 69/23843  | 0.984872 | 0.987457 | 0.938965 | Defa29/De  |
| GO_BP_m1GO:003241lysosome lr3/2606   | 70/23843  | 0.986179 | 0.988491 | 0.939948 | Map6d1/N   |
| GO_BP_m1GO:003051positive rec1/2606  | 37/23843  | 0.98624  | 0.988491 | 0.939948 | Kcp        |
| GO_BP_m1GO:006067placenta bl1/2606   | 37/23843  | 0.98624  | 0.988491 | 0.939948 | Hs6st1     |
| GO_BP_m1GO:000038alternative 2/2606  | 55/23843  | 0.986752 | 0.988891 | 0.940328 | Fmr1/Rbmi  |
| GO_BP_m1GO:006184antimicrob 4/2606   | 85/23843  | 0.986898 | 0.988925 | 0.94036  | Defa29/De  |
| GO_BP_m1GO:003278positive rec1/2606  | 38/23843  | 0.987747 | 0.989662 | 0.941061 | Atp1b2     |
| GO_BP_m1GO:004346regulation 2/2606   | 57/23843  | 0.989162 | 0.990967 | 0.942302 | Atp1b2/Cn  |
| GO_BP_m1GO:003519production1/2606    | 41/23843  | 0.991347 | 0.992958 | 0.944195 | Zc3h12a    |
| GO_BP_m1GO:001973antimicrob 5/2606   | 104/23843 | 0.991386 | 0.992958 | 0.944195 | Defa29/De  |
| GO_BP_m1GO:00509C detection c28/2606 | 377/23843 | 0.991488 | 0.992958 | 0.944195 | Adora1/An  |
| GO_BP_m1GO:001692protein sur1/2606   | 42/23843  | 0.992294 | 0.993425 | 0.944639 | Hmg20a     |
| GO_BP_m1GO:003105dsRNA frac1/2606    | 42/23843  | 0.992294 | 0.993425 | 0.944639 | Zc3h12a    |
| GO_BP_m1GO:007091production1/2606    | 42/23843  | 0.992294 | 0.993425 | 0.944639 | Zc3h12a    |
| GO_BP_m1GO:00451Cintermedia 1/2606   | 43/23843  | 0.993138 | 0.994156 | 0.945335 | Des        |
| GO_BP_m1GO:003052androgen r1/2606    | 45/23843  | 0.994558 | 0.995465 | 0.946579 | Hdac1      |
| GO_BP_m1GO:000227mast cell ar1/2606  | 48/23843  | 0.996157 | 0.996725 | 0.947777 | Ms4a2      |
| GO_BP_m1GO:000636transcriptic1/2606  | 48/23843  | 0.996157 | 0.996725 | 0.947777 | H2afy      |
| GO_BP_m1GO:00433C mast cell d1/2606  | 48/23843  | 0.996157 | 0.996725 | 0.947777 | Ms4a2      |
| GO_BP_m1GO:00509C sensory pe 2/2606  | 70/23843  | 0.997123 | 0.997577 | 0.948588 | Cd36/Trpr  |
| GO_BP_m1GO:001923response tr4/2606   | 105/23843 | 0.997704 | 0.998045 | 0.949033 | Gng8/Vmn   |
| GO_BP_m1GO:004505T cell selec 1/2606 | 54/23843  | 0.998084 | 0.998312 | 0.949286 | Ptpcr      |

|          |           |              |         |           |          |          |          |             |
|----------|-----------|--------------|---------|-----------|----------|----------|----------|-------------|
| GO_BP_m1 | GO:000959 | detection c  | 21/2606 | 337/23843 | 0.998959 | 0.999073 | 0.95001  | Foxa2/Kcni  |
| GO_BP_m1 | GO:005090 | detection c  | 18/2606 | 308/23843 | 0.999337 | 0.999337 | 0.950261 | Olfml1180/C |
| GO_BP_m2 | GO:000641 | regulation   | 21/470  | 401/23843 | 5.38E-05 | 0.14701  | 0.137635 | 2810006K2   |
| GO_BP_m2 | GO:001060 | posttranscr  | 23/470  | 471/23843 | 7.01E-05 | 0.14701  | 0.137635 | 2810006K2   |
| GO_BP_m2 | GO:003424 | regulation   | 21/470  | 441/23843 | 0.000202 | 0.175617 | 0.164418 | 2810006K2   |
| GO_BP_m2 | GO:003647 | neuron de    | 3/470   | 7/23843   | 0.000251 | 0.175617 | 0.164418 | Rack1/Nr4   |
| GO_BP_m2 | GO:190320 | regulation   | 3/470   | 7/23843   | 0.000251 | 0.175617 | 0.164418 | Rack1/Nr4   |
| GO_BP_m2 | GO:190320 | negative re  | 3/470   | 7/23843   | 0.000251 | 0.175617 | 0.164418 | Rack1/Nr4   |
| GO_BP_m2 | GO:190331 | negative re  | 7/470   | 77/23843  | 0.00081  | 0.365555 | 0.342244 | Dhx34/Dyr   |
| GO_BP_m2 | GO:190320 | negative re  | 4/470   | 22/23843  | 0.000823 | 0.365555 | 0.342244 | Atf4/Rack1  |
| GO_BP_m2 | GO:000243 | Fc receptor  | 3/470   | 11/23843  | 0.001116 | 0.365555 | 0.342244 | Csk/Myo1c   |
| GO_BP_m2 | GO:000685 | extracellula | 2/470   | 3/23843   | 0.001148 | 0.365555 | 0.342244 | Arrdc1/Tsg  |
| GO_BP_m2 | GO:005103 | snRNA trar   | 2/470   | 3/23843   | 0.001148 | 0.365555 | 0.342244 | Phax/Ran    |
| GO_BP_m2 | GO:007036 | positive re  | 2/470   | 3/23843   | 0.001148 | 0.365555 | 0.342244 | Bmp4/Foxa   |
| GO_BP_m2 | GO:010602 | regulation   | 2/470   | 3/23843   | 0.001148 | 0.365555 | 0.342244 | Ralb/Stxbp  |
| GO_BP_m2 | GO:000655 | leucine cat  | 2/470   | 4/23843   | 0.002266 | 0.365555 | 0.342244 | Hmgcl/lvd   |
| GO_BP_m2 | GO:003609 | positive re  | 2/470   | 4/23843   | 0.002266 | 0.365555 | 0.342244 | Atf4/Chd6   |
| GO_BP_m2 | GO:007036 | regulation   | 2/470   | 4/23843   | 0.002266 | 0.365555 | 0.342244 | Bmp4/Foxa   |
| GO_BP_m2 | GO:009023 | regulation   | 2/470   | 4/23843   | 0.002266 | 0.365555 | 0.342244 | H3f3b/Traq  |
| GO_BP_m2 | GO:000619 | cAMP catal   | 3/470   | 14/23843  | 0.002356 | 0.365555 | 0.342244 | Rack1/Pde   |
| GO_BP_m2 | GO:000648 | protein der  | 4/470   | 29/23843  | 0.002395 | 0.365555 | 0.342244 | Alkbh4/Hr   |
| GO_BP_m2 | GO:000821 | protein der  | 4/470   | 29/23843  | 0.002395 | 0.365555 | 0.342244 | Alkbh4/Hr   |
| GO_BP_m2 | GO:003647 | neuron de    | 4/470   | 29/23843  | 0.002395 | 0.365555 | 0.342244 | Atf4/Rack1  |
| GO_BP_m2 | GO:190320 | regulation   | 4/470   | 29/23843  | 0.002395 | 0.365555 | 0.342244 | Atf4/Rack1  |
| GO_BP_m2 | GO:004580 | negative re  | 5/470   | 49/23843  | 0.002722 | 0.365555 | 0.342244 | Csk/Rack1/  |
| GO_BP_m2 | GO:003246 | positive re  | 4/470   | 31/23843  | 0.003077 | 0.365555 | 0.342244 | Aurkb/Chr   |
| GO_BP_m2 | GO:190331 | regulation   | 11/470  | 213/23843 | 0.003499 | 0.365555 | 0.342244 | Dhx34/Dyr   |
| GO_BP_m2 | GO:003209 | positive re  | 7/470   | 100/23843 | 0.003669 | 0.365555 | 0.342244 | Agrn/Bamk   |
| GO_BP_m2 | GO:005103 | regulation   | 2/470   | 5/23843   | 0.003728 | 0.365555 | 0.342244 | Chmp3/Ral   |
| GO_BP_m2 | GO:005068 | negative re  | 4/470   | 33/23843  | 0.003879 | 0.365555 | 0.342244 | Dyrk1a/Hn   |
| GO_BP_m2 | GO:003466 | ncRNA me     | 18/470  | 453/23843 | 0.004121 | 0.365555 | 0.342244 | Chd7/Ell/Ef |
| GO_BP_m2 | GO:006164 | cytoskeletc  | 6/470   | 77/23843  | 0.004142 | 0.365555 | 0.342244 | Alkbh4/Au   |
| GO_BP_m2 | GO:000921 | cyclic nucle | 3/470   | 17/23843  | 0.004213 | 0.365555 | 0.342244 | Rack1/Pde   |
| GO_BP_m2 | GO:004326 | negative re  | 4/470   | 34/23843  | 0.004329 | 0.365555 | 0.342244 | Agrn/Atf4/  |
| GO_BP_m2 | GO:005129 | protein het  | 9/470   | 159/23843 | 0.004396 | 0.365555 | 0.342244 | Agrn/Chmp   |
| GO_BP_m2 | GO:003647 | cell death i | 4/470   | 35/23843  | 0.004813 | 0.365555 | 0.342244 | Rack1/Nr4   |
| GO_BP_m2 | GO:005076 | negative re  | 3/470   | 18/23843  | 0.004982 | 0.365555 | 0.342244 | Csk/Rack1/  |
| GO_BP_m2 | GO:000640 | mRNA cata    | 10/470  | 193/23843 | 0.00513  | 0.365555 | 0.342244 | Dhx34/Elav  |
| GO_BP_m2 | GO:001714 | negative re  | 11/470  | 225/23843 | 0.005268 | 0.365555 | 0.342244 | Bmp4/Dnd    |
| GO_BP_m2 | GO:000016 | phosphore    | 2/470   | 6/23843   | 0.005519 | 0.365555 | 0.342244 | Kcni2/Kcni  |
| GO_BP_m2 | GO:003648 | intrinsic ap | 2/470   | 6/23843   | 0.005519 | 0.365555 | 0.342244 | Pdcd10/Pir  |
| GO_BP_m2 | GO:007210 | glomerulus   | 2/470   | 6/23843   | 0.005519 | 0.365555 | 0.342244 | Bmp4/Not    |
| GO_BP_m2 | GO:007210 | glomerular   | 2/470   | 6/23843   | 0.005519 | 0.365555 | 0.342244 | Bmp4/Not    |
| GO_BP_m2 | GO:003225 | methylation  | 14/470  | 327/23843 | 0.005741 | 0.365555 | 0.342244 | Auts2/Ftsj1 |
| GO_BP_m2 | GO:000231 | mature B c   | 3/470   | 19/23843  | 0.005831 | 0.365555 | 0.342244 | Itfg2/Lfng/ |
| GO_BP_m2 | GO:000091 | cytokinesis  | 9/470   | 167/23843 | 0.006033 | 0.365555 | 0.342244 | Alkbh4/Au   |
| GO_BP_m2 | GO:190211 | regulation   | 9/470   | 171/23843 | 0.00701  | 0.365555 | 0.342244 | Cep120/Cr   |
| GO_BP_m2 | GO:012003 | regulation   | 9/470   | 172/23843 | 0.007272 | 0.365555 | 0.342244 | Agrn/Auts2  |



|                                        |           |          |          |          |              |
|----------------------------------------|-----------|----------|----------|----------|--------------|
| GO_BP_m2GO:00065E leucine me 2/470     | 7/23843   | 0.007626 | 0.365555 | 0.342244 | Hmgcl/lvd    |
| GO_BP_m2GO:00360E cleavage ft 2/470    | 7/23843   | 0.007626 | 0.365555 | 0.342244 | Aurkb/Spir   |
| GO_BP_m2GO:00469E cellular ket 2/470   | 7/23843   | 0.007626 | 0.365555 | 0.342244 | Hmgcl/Oxc    |
| GO_BP_m2GO:00602E lens induct 2/470    | 7/23843   | 0.007626 | 0.365555 | 0.342244 | Bmp4/Six3    |
| GO_BP_m2GO:00614E renal syste 2/470    | 7/23843   | 0.007626 | 0.365555 | 0.342244 | Bmp4/Notc    |
| GO_BP_m2GO:00614E kidney vasc 2/470    | 7/23843   | 0.007626 | 0.365555 | 0.342244 | Bmp4/Notc    |
| GO_BP_m2GO:007234 rescue of s 2/470    | 7/23843   | 0.007626 | 0.365555 | 0.342244 | 2810006K2    |
| GO_BP_m2GO:00166C Rac proteir 4/470    | 40/23843  | 0.007777 | 0.365555 | 0.342244 | Arap3/Auts   |
| GO_BP_m2GO:00604E regulation 9/470     | 174/23843 | 0.007819 | 0.365555 | 0.342244 | Agrn/Auts2   |
| GO_BP_m2GO:00018E liver develc 7/470   | 115/23843 | 0.007823 | 0.365555 | 0.342244 | Bmp4/Ceb     |
| GO_BP_m2GO:004341 macromole 12/470     | 273/23843 | 0.008322 | 0.365555 | 0.342244 | Auts2/Ftsj1  |
| GO_BP_m2GO:000037 RNA splicir 11/470   | 240/23843 | 0.008397 | 0.365555 | 0.342244 | Cdc5l/Dyrk   |
| GO_BP_m2GO:00003E mRNA splic 11/470    | 240/23843 | 0.008397 | 0.365555 | 0.342244 | Cdc5l/Dyrk   |
| GO_BP_m2GO:004572 positive re 7/470    | 117/23843 | 0.008565 | 0.365555 | 0.342244 | Dnd1/Eif4c   |
| GO_BP_m2GO:000037 RNA splicir 11/470   | 241/23843 | 0.008648 | 0.365555 | 0.342244 | Cdc5l/Dyrk   |
| GO_BP_m2GO:003424 negative re 11/470   | 241/23843 | 0.008648 | 0.365555 | 0.342244 | Bmp4/Dnd     |
| GO_BP_m2GO:00325C cytokinetic 3/470    | 22/23843  | 0.008871 | 0.365555 | 0.342244 | Alkbh4/Au    |
| GO_BP_m2GO:007187 cellular res 3/470   | 22/23843  | 0.008871 | 0.365555 | 0.342244 | Atf4/Nr4a3   |
| GO_BP_m2GO:00506E regulation 7/470     | 118/23843 | 0.008956 | 0.365555 | 0.342244 | Dyrk1a/Hn    |
| GO_BP_m2GO:00610C hepaticobil 7/470    | 118/23843 | 0.008956 | 0.365555 | 0.342244 | Bmp4/Ceb     |
| GO_BP_m2GO:00181C peptidyl-ty 13/470   | 310/23843 | 0.008973 | 0.365555 | 0.342244 | Agrn/Angp    |
| GO_BP_m2GO:00002E mitochond 4/470      | 42/23843  | 0.009236 | 0.365555 | 0.342244 | Cox10/Mtfj   |
| GO_BP_m2GO:007182 protein-D 10/470     | 211/23843 | 0.009378 | 0.365555 | 0.342244 | Asf1a/Chaf   |
| GO_BP_m2GO:001821 peptidyl-ty 13/470   | 313/23843 | 0.009675 | 0.365555 | 0.342244 | Agrn/Angp    |
| GO_BP_m2GO:00487E semicircula 2/470    | 8/23843   | 0.010036 | 0.365555 | 0.342244 | Chd7/Nr4a    |
| GO_BP_m2GO:00718E cellular res 3/470   | 23/23843  | 0.010054 | 0.365555 | 0.342244 | Atf4/Nr4a3   |
| GO_BP_m2GO:00718E response tr 3/470    | 23/23843  | 0.010054 | 0.365555 | 0.342244 | Atf4/Nr4a3   |
| GO_BP_m2GO:014011 extracellula 3/470   | 23/23843  | 0.010054 | 0.365555 | 0.342244 | Arrdc1/Rak   |
| GO_BP_m2GO:00023E mature B c 3/470     | 24/23843  | 0.011325 | 0.365555 | 0.342244 | Itfg2/Lfng/  |
| GO_BP_m2GO:004572 positive re 3/470    | 24/23843  | 0.011325 | 0.365555 | 0.342244 | Cep120/Cr    |
| GO_BP_m2GO:004802 negative re 3/470    | 24/23843  | 0.011325 | 0.365555 | 0.342244 | Dyrk1a/Hn    |
| GO_BP_m2GO:00718E response tr 3/470    | 24/23843  | 0.011325 | 0.365555 | 0.342244 | Atf4/Nr4a3   |
| GO_BP_m2GO:00619E establishm 4/470     | 45/23843  | 0.011742 | 0.365555 | 0.342244 | Csk/Rack1/   |
| GO_BP_m2GO:00725E establishm 16/470    | 430/23843 | 0.011919 | 0.365555 | 0.342244 | Bmp4/Ect2    |
| GO_BP_m2GO:00433E regulation 10/470    | 220/23843 | 0.012317 | 0.365555 | 0.342244 | Agrn/Aplp    |
| GO_BP_m2GO:000164 osteoblast 9/470     | 188/23843 | 0.01257  | 0.365555 | 0.342244 | Asf1a/Bmp    |
| GO_BP_m2GO:00346E nucleobase 15/470    | 396/23843 | 0.012612 | 0.365555 | 0.342244 | Dhx34/Elav   |
| GO_BP_m2GO:19010E negative re 3/470    | 25/23843  | 0.012685 | 0.365555 | 0.342244 | Rack1/Nr4    |
| GO_BP_m2GO:19032C negative re 3/470    | 25/23843  | 0.012685 | 0.365555 | 0.342244 | Rack1/Nr4    |
| GO_BP_m2GO:20010E negative re 3/470    | 25/23843  | 0.012685 | 0.365555 | 0.342244 | Rack1/Nr4    |
| GO_BP_m2GO:003232 alanine tra 2/470    | 9/23843   | 0.012736 | 0.365555 | 0.342244 | Slc36a4/Slc  |
| GO_BP_m2GO:00429E regulation 2/470     | 9/23843   | 0.012736 | 0.365555 | 0.342244 | Csk/Rack1    |
| GO_BP_m2GO:00482E elastic fiber 2/470  | 9/23843   | 0.012736 | 0.365555 | 0.342244 | Mfap4/Myf    |
| GO_BP_m2GO:00985E histone H3 2/470     | 9/23843   | 0.012736 | 0.365555 | 0.342244 | Hist1h1e/S   |
| GO_BP_m2GO:190222 ketone boc 2/470     | 9/23843   | 0.012736 | 0.365555 | 0.342244 | Hmgcl/Oxc    |
| GO_BP_m2GO:00021E cytoplasm 6/470      | 98/23843  | 0.013053 | 0.365555 | 0.342244 | Eif5/Ftsj1/M |
| GO_BP_m2GO:00518E regulation 5/470     | 71/23843  | 0.013083 | 0.365555 | 0.342244 | Rack1/Heb    |
| GO_BP_m2GO:004427 cellular nitr 16/470 | 435/23843 | 0.013174 | 0.365555 | 0.342244 | Dhx34/Elav   |

|                   |              |        |           |          |          |          |             |
|-------------------|--------------|--------|-----------|----------|----------|----------|-------------|
| GO_BP_m2GO:012003 | positive reç | 6/470  | 99/23843  | 0.013672 | 0.365555 | 0.342244 | Agrn/Auts2  |
| GO_BP_m2GO:00315C | protein-co   | 9/470  | 191/23843 | 0.013819 | 0.365555 | 0.342244 | Ap2b1/Hnr   |
| GO_BP_m2GO:00064C | RNA catab    | 10/470 | 224/23843 | 0.013827 | 0.365555 | 0.342244 | Dhx34/Elav  |
| GO_BP_m2GO:190211 | positive reç | 5/470  | 72/23843  | 0.013838 | 0.365555 | 0.342244 | Cep120/Cr   |
| GO_BP_m2GO:00083E | RNA splicir  | 14/470 | 365/23843 | 0.014161 | 0.365555 | 0.342244 | Cdc5l/Clk1  |
| GO_BP_m2GO:00108E | positive reç | 4/470  | 48/23843  | 0.014646 | 0.365555 | 0.342244 | Bmp4/Gdff   |
| GO_BP_m2GO:00467C | heterocycle  | 16/470 | 441/23843 | 0.014815 | 0.365555 | 0.342244 | Dhx34/Elav  |
| GO_BP_m2GO:00512E | protein tet  | 8/470  | 162/23843 | 0.015276 | 0.365555 | 0.342244 | Acaca/Adsl  |
| GO_BP_m2GO:00324E | regulation   | 5/470  | 74/23843  | 0.015436 | 0.365555 | 0.342244 | Aurkb/Chr   |
| GO_BP_m2GO:001657 | histone der  | 3/470  | 27/23843  | 0.015671 | 0.365555 | 0.342244 | Hr/Jmjd6/k  |
| GO_BP_m2GO:00331E | negative re  | 3/470  | 27/23843  | 0.015671 | 0.365555 | 0.342244 | Rack1/Gpd   |
| GO_BP_m2GO:00360C | positive reç | 3/470  | 27/23843  | 0.015671 | 0.365555 | 0.342244 | Atf4/Chd6/  |
| GO_BP_m2GO:19032C | negative re  | 4/470  | 49/23843  | 0.015706 | 0.365555 | 0.342244 | Atf4/Rack1  |
| GO_BP_m2GO:000231 | marginal z   | 2/470  | 10/23843  | 0.015714 | 0.365555 | 0.342244 | Lfng/Ptk2b  |
| GO_BP_m2GO:000314 | membrano     | 2/470  | 10/23843  | 0.015714 | 0.365555 | 0.342244 | Bmp4/Id2    |
| GO_BP_m2GO:00442E | small mole   | 12/470 | 298/23843 | 0.015767 | 0.365555 | 0.342244 | Acat2/Echc  |
| GO_BP_m2GO:00068E | mitochond    | 11/470 | 263/23843 | 0.015783 | 0.365555 | 0.342244 | Bloc1s2/Cr  |
| GO_BP_m2GO:00711E | ribonucleo   | 5/470  | 75/23843  | 0.016279 | 0.365555 | 0.342244 | Hnrnpa2b1   |
| GO_BP_m2GO:00900E | positive reç | 10/470 | 230/23843 | 0.016345 | 0.365555 | 0.342244 | Aurkb/Cep   |
| GO_BP_m2GO:00351E | hindlimb r   | 4/470  | 50/23843  | 0.016813 | 0.365555 | 0.342244 | Aff3/Bmp4   |
| GO_BP_m2GO:19004C | negative re  | 4/470  | 50/23843  | 0.016813 | 0.365555 | 0.342244 | Atf4/Rack1  |
| GO_BP_m2GO:00459E | negative re  | 3/470  | 28/23843  | 0.0173   | 0.365555 | 0.342244 | Bmp4/Lfng   |
| GO_BP_m2GO:006101 | regulation   | 6/470  | 105/23843 | 0.017816 | 0.365555 | 0.342244 | Dhx34/Elav  |
| GO_BP_m2GO:190201 | regulation   | 4/470  | 51/23843  | 0.017967 | 0.365555 | 0.342244 | Cep120/Cr   |
| GO_BP_m2GO:00063E | tRNA meta    | 8/470  | 167/23843 | 0.018014 | 0.365555 | 0.342244 | Eprs/Exosc: |
| GO_BP_m2GO:00342E | positive reç | 7/470  | 136/23843 | 0.01841  | 0.365555 | 0.342244 | Dnd1/Eif4G  |
| GO_BP_m2GO:00000E | urea cycle   | 2/470  | 11/23843  | 0.018957 | 0.365555 | 0.342244 | Cad/Cebp    |
| GO_BP_m2GO:00182E | protein-ch   | 2/470  | 11/23843  | 0.018957 | 0.365555 | 0.342244 | Ambp/Cry    |
| GO_BP_m2GO:00309E | astral micr  | 2/470  | 11/23843  | 0.018957 | 0.365555 | 0.342244 | Cep120/Ra   |
| GO_BP_m2GO:004204 | olfactory b  | 2/470  | 11/23843  | 0.018957 | 0.365555 | 0.342244 | Chd7/Lmx1   |
| GO_BP_m2GO:004361 | regulation   | 2/470  | 11/23843  | 0.018957 | 0.365555 | 0.342244 | Atf4/Chd6   |
| GO_BP_m2GO:006087 | semicircula  | 2/470  | 11/23843  | 0.018957 | 0.365555 | 0.342244 | Chd7/Nr4a   |
| GO_BP_m2GO:00721C | glomerulus   | 2/470  | 11/23843  | 0.018957 | 0.365555 | 0.342244 | Bmp4/Not    |
| GO_BP_m2GO:190024 | regulation   | 2/470  | 11/23843  | 0.018957 | 0.365555 | 0.342244 | Sh3gl1/Syt  |
| GO_BP_m2GO:199044 | positive reç | 2/470  | 11/23843  | 0.018957 | 0.365555 | 0.342244 | Atf4/Mbtp   |
| GO_BP_m2GO:20002E | positive reç | 2/470  | 11/23843  | 0.018957 | 0.365555 | 0.342244 | Agrp/Nr4a   |
| GO_BP_m2GO:00082C | bile acid m  | 3/470  | 29/23843  | 0.01902  | 0.365555 | 0.342244 | Fabp6/Gba   |
| GO_BP_m2GO:00091E | purine ribo  | 3/470  | 29/23843  | 0.01902  | 0.365555 | 0.342244 | Rack1/Pde:  |
| GO_BP_m2GO:00092E | ribonucleo   | 3/470  | 29/23843  | 0.01902  | 0.365555 | 0.342244 | Rack1/Pde:  |
| GO_BP_m2GO:003311 | negative re  | 3/470  | 29/23843  | 0.01902  | 0.365555 | 0.342244 | Dyrk1a/Hn   |
| GO_BP_m2GO:00421E | heme met     | 3/470  | 29/23843  | 0.01902  | 0.365555 | 0.342244 | Alad/Cox1   |
| GO_BP_m2GO:003472 | nucleosom    | 7/470  | 137/23843 | 0.019085 | 0.365555 | 0.342244 | Asf1a/Chaf  |
| GO_BP_m2GO:00194E | aromatic c   | 16/470 | 455/23843 | 0.01926  | 0.365555 | 0.342244 | Dhx34/Elav  |
| GO_BP_m2GO:00457E | positive reç | 13/470 | 343/23843 | 0.019294 | 0.365555 | 0.342244 | Aurkb/Cep   |
| GO_BP_m2GO:00009E | nuclear-tra  | 6/470  | 107/23843 | 0.019369 | 0.365555 | 0.342244 | Dhx34/Exo   |
| GO_BP_m2GO:000322 | right ventri | 1/470  | 1/23843   | 0.019712 | 0.365555 | 0.342244 | Chd7        |
| GO_BP_m2GO:000604 | UDP-N-ac     | 1/470  | 1/23843   | 0.019712 | 0.365555 | 0.342244 | Mgat1       |
| GO_BP_m2GO:00064C | snRNA exp    | 1/470  | 1/23843   | 0.019712 | 0.365555 | 0.342244 | Phax        |

|                                |       |         |          |          |          |         |
|--------------------------------|-------|---------|----------|----------|----------|---------|
| GO_BP_m2GO:000707positive reğ  | 1/470 | 1/23843 | 0.019712 | 0.365555 | 0.342244 | Sirt7   |
| GO_BP_m2GO:00075Cmesoderm.     | 1/470 | 1/23843 | 0.019712 | 0.365555 | 0.342244 | Bmp4    |
| GO_BP_m2GO:000944pyruvate o:   | 1/470 | 1/23843 | 0.019712 | 0.365555 | 0.342244 | Nr4a3   |
| GO_BP_m2GO:001012arginine ca   | 1/470 | 1/23843 | 0.019712 | 0.365555 | 0.342244 | Oat     |
| GO_BP_m2GO:00183Çpeptidyl-ly   | 1/470 | 1/23843 | 0.019712 | 0.365555 | 0.342244 | Jmjd6   |
| GO_BP_m2GO:00194Çarginine ca   | 1/470 | 1/23843 | 0.019712 | 0.365555 | 0.342244 | Oat     |
| GO_BP_m2GO:001954arginine ca   | 1/470 | 1/23843 | 0.019712 | 0.365555 | 0.342244 | Oat     |
| GO_BP_m2GO:002157rhombome      | 1/470 | 1/23843 | 0.019712 | 0.365555 | 0.342244 | Mafb    |
| GO_BP_m2GO:00308Cpositive reğ  | 1/470 | 1/23843 | 0.019712 | 0.365555 | 0.342244 | Rack1   |
| GO_BP_m2GO:003082positive reğ  | 1/470 | 1/23843 | 0.019712 | 0.365555 | 0.342244 | Rack1   |
| GO_BP_m2GO:003127lateral pset  | 1/470 | 1/23843 | 0.019712 | 0.365555 | 0.342244 | Klhl41  |
| GO_BP_m2GO:003127regulation    | 1/470 | 1/23843 | 0.019712 | 0.365555 | 0.342244 | Klhl41  |
| GO_BP_m2GO:00312Çactin phosç   | 1/470 | 1/23843 | 0.019712 | 0.365555 | 0.342244 | Twf1    |
| GO_BP_m2GO:00323Cnegative re   | 1/470 | 1/23843 | 0.019712 | 0.365555 | 0.342244 | Acsl4   |
| GO_BP_m2GO:003312positive reğ  | 1/470 | 1/23843 | 0.019712 | 0.365555 | 0.342244 | Rack1   |
| GO_BP_m2GO:00334Çcholesterol   | 1/470 | 1/23843 | 0.019712 | 0.365555 | 0.342244 | Sc5d    |
| GO_BP_m2GO:00342Çislet amyloi  | 1/470 | 1/23843 | 0.019712 | 0.365555 | 0.342244 | Pcsk2   |
| GO_BP_m2GO:00380Çpositive reğ  | 1/470 | 1/23843 | 0.019712 | 0.365555 | 0.342244 | Nr4a3   |
| GO_BP_m2GO:004294D-alanine t   | 1/470 | 1/23843 | 0.019712 | 0.365555 | 0.342244 | Slc7a10 |
| GO_BP_m2GO:00430Çregulation    | 1/470 | 1/23843 | 0.019712 | 0.365555 | 0.342244 | Gchfr   |
| GO_BP_m2GO:00431Cnegative re   | 1/470 | 1/23843 | 0.019712 | 0.365555 | 0.342244 | Gchfr   |
| GO_BP_m2GO:00435Çregulation    | 1/470 | 1/23843 | 0.019712 | 0.365555 | 0.342244 | Twf1    |
| GO_BP_m2GO:00457Çpositive reğ  | 1/470 | 1/23843 | 0.019712 | 0.365555 | 0.342244 | Acat2   |
| GO_BP_m2GO:00462Çformaldehy    | 1/470 | 1/23843 | 0.019712 | 0.365555 | 0.342244 | Kdm3a   |
| GO_BP_m2GO:00466Çfolic acid c: | 1/470 | 1/23843 | 0.019712 | 0.365555 | 0.342244 | Pm20d2  |
| GO_BP_m2GO:00480Çheme o mç     | 1/470 | 1/23843 | 0.019712 | 0.365555 | 0.342244 | Cox10   |
| GO_BP_m2GO:00480Çheme O bir    | 1/470 | 1/23843 | 0.019712 | 0.365555 | 0.342244 | Cox10   |
| GO_BP_m2GO:00483Çintermedia:   | 1/470 | 1/23843 | 0.019712 | 0.365555 | 0.342244 | Bmp4    |
| GO_BP_m2GO:00483Çintermedia:   | 1/470 | 1/23843 | 0.019712 | 0.365555 | 0.342244 | Bmp4    |
| GO_BP_m2GO:00483Çintermedia:   | 1/470 | 1/23843 | 0.019712 | 0.365555 | 0.342244 | Bmp4    |
| GO_BP_m2GO:00486Çnegative re   | 1/470 | 1/23843 | 0.019712 | 0.365555 | 0.342244 | Spg20   |
| GO_BP_m2GO:005501regulation    | 1/470 | 1/23843 | 0.019712 | 0.365555 | 0.342244 | Bmp4    |
| GO_BP_m2GO:005502positive reğ  | 1/470 | 1/23843 | 0.019712 | 0.365555 | 0.342244 | Bmp4    |
| GO_BP_m2GO:00605Cbud dilatio   | 1/470 | 1/23843 | 0.019712 | 0.365555 | 0.342244 | Bmp4    |
| GO_BP_m2GO:006114BMP signal    | 1/470 | 1/23843 | 0.019712 | 0.365555 | 0.342244 | Bmp4    |
| GO_BP_m2GO:00611Çrenal syste   | 1/470 | 1/23843 | 0.019712 | 0.365555 | 0.342244 | Bmp4    |
| GO_BP_m2GO:00611ÇBMP signal    | 1/470 | 1/23843 | 0.019712 | 0.365555 | 0.342244 | Bmp4    |
| GO_BP_m2GO:00611Çpulmonary     | 1/470 | 1/23843 | 0.019712 | 0.365555 | 0.342244 | Bmp4    |
| GO_BP_m2GO:00611Çregulation    | 1/470 | 1/23843 | 0.019712 | 0.365555 | 0.342244 | Dkk4    |
| GO_BP_m2GO:006117negative re   | 1/470 | 1/23843 | 0.019712 | 0.365555 | 0.342244 | Dkk4    |
| GO_BP_m2GO:00611Çnegative re   | 1/470 | 1/23843 | 0.019712 | 0.365555 | 0.342244 | Sfrp2   |
| GO_BP_m2GO:006121regulation    | 1/470 | 1/23843 | 0.019712 | 0.365555 | 0.342244 | Bmp4    |
| GO_BP_m2GO:007007histone arc   | 1/470 | 1/23843 | 0.019712 | 0.365555 | 0.342244 | Jmjd6   |
| GO_BP_m2GO:007007histone H3    | 1/470 | 1/23843 | 0.019712 | 0.365555 | 0.342244 | Jmjd6   |
| GO_BP_m2GO:007007histone H4    | 1/470 | 1/23843 | 0.019712 | 0.365555 | 0.342244 | Jmjd6   |
| GO_BP_m2GO:00701Çmitochond     | 1/470 | 1/23843 | 0.019712 | 0.365555 | 0.342244 | Wars2   |
| GO_BP_m2GO:007161IP-10 prod    | 1/470 | 1/23843 | 0.019712 | 0.365555 | 0.342244 | Mavs    |
| GO_BP_m2GO:00716Çregulation    | 1/470 | 1/23843 | 0.019712 | 0.365555 | 0.342244 | Mavs    |

|                   |              |       |           |          |          |          |             |
|-------------------|--------------|-------|-----------|----------|----------|----------|-------------|
| GO_BP_m2GO:007166 | positive re  | 1/470 | 1/23843   | 0.019712 | 0.365555 | 0.342244 | Mavs        |
| GO_BP_m2GO:007189 | BMP signal   | 1/470 | 1/23843   | 0.019712 | 0.365555 | 0.342244 | Bmp4        |
| GO_BP_m2GO:007197 | cell gliding | 1/470 | 1/23843   | 0.019712 | 0.365555 | 0.342244 | Myo1g       |
| GO_BP_m2GO:007209 | negative re  | 1/470 | 1/23843   | 0.019712 | 0.365555 | 0.342244 | Bmp4        |
| GO_BP_m2GO:007209 | negative re  | 1/470 | 1/23843   | 0.019712 | 0.365555 | 0.342244 | Bmp4        |
| GO_BP_m2GO:007209 | anterior/pc  | 1/470 | 1/23843   | 0.019712 | 0.365555 | 0.342244 | Bmp4        |
| GO_BP_m2GO:00721C | specificatio | 1/470 | 1/23843   | 0.019712 | 0.365555 | 0.342244 | Bmp4        |
| GO_BP_m2GO:00721C | specificatio | 1/470 | 1/23843   | 0.019712 | 0.365555 | 0.342244 | Bmp4        |
| GO_BP_m2GO:007219 | ureter epitl | 1/470 | 1/23843   | 0.019712 | 0.365555 | 0.342244 | Bmp4        |
| GO_BP_m2GO:00722C | negative re  | 1/470 | 1/23843   | 0.019712 | 0.365555 | 0.342244 | Bmp4        |
| GO_BP_m2GO:00985E | innate voc   | 1/470 | 1/23843   | 0.019712 | 0.365555 | 0.342244 | Auts2       |
| GO_BP_m2GO:010602 | positive re  | 1/470 | 1/23843   | 0.019712 | 0.365555 | 0.342244 | Stxbp1      |
| GO_BP_m2GO:012011 | T cell mear  | 1/470 | 1/23843   | 0.019712 | 0.365555 | 0.342244 | Myo1g       |
| GO_BP_m2GO:190024 | negative re  | 1/470 | 1/23843   | 0.019712 | 0.365555 | 0.342244 | Syt11       |
| GO_BP_m2GO:190196 | positive re  | 1/470 | 1/23843   | 0.019712 | 0.365555 | 0.342244 | Bmp4        |
| GO_BP_m2GO:190216 | negative re  | 1/470 | 1/23843   | 0.019712 | 0.365555 | 0.342244 | Pcbp4       |
| GO_BP_m2GO:190327 | negative re  | 1/470 | 1/23843   | 0.019712 | 0.365555 | 0.342244 | Agrn        |
| GO_BP_m2GO:19034C | negative re  | 1/470 | 1/23843   | 0.019712 | 0.365555 | 0.342244 | Agrn        |
| GO_BP_m2GO:19038E | regulation   | 1/470 | 1/23843   | 0.019712 | 0.365555 | 0.342244 | Pink1       |
| GO_BP_m2GO:19038E | positive re  | 1/470 | 1/23843   | 0.019712 | 0.365555 | 0.342244 | Pink1       |
| GO_BP_m2GO:190424 | positive re  | 1/470 | 1/23843   | 0.019712 | 0.365555 | 0.342244 | Pabpn1      |
| GO_BP_m2GO:19044E | positive re  | 1/470 | 1/23843   | 0.019712 | 0.365555 | 0.342244 | Acat2       |
| GO_BP_m2GO:190456 | response tr  | 1/470 | 1/23843   | 0.019712 | 0.365555 | 0.342244 | Cdc5l       |
| GO_BP_m2GO:190456 | cellular res | 1/470 | 1/23843   | 0.019712 | 0.365555 | 0.342244 | Cdc5l       |
| GO_BP_m2GO:190473 | positive re  | 1/470 | 1/23843   | 0.019712 | 0.365555 | 0.342244 | Acat2       |
| GO_BP_m2GO:19049E | glycine im   | 1/470 | 1/23843   | 0.019712 | 0.365555 | 0.342244 | Slc25a38    |
| GO_BP_m2GO:190516 | regulation   | 1/470 | 1/23843   | 0.019712 | 0.365555 | 0.342244 | Syt11       |
| GO_BP_m2GO:19054E | positive re  | 1/470 | 1/23843   | 0.019712 | 0.365555 | 0.342244 | Zbtb1       |
| GO_BP_m2GO:190546 | regulation   | 1/470 | 1/23843   | 0.019712 | 0.365555 | 0.342244 | Syt11       |
| GO_BP_m2GO:190546 | negative re  | 1/470 | 1/23843   | 0.019712 | 0.365555 | 0.342244 | Syt11       |
| GO_BP_m2GO:20000C | regulation   | 1/470 | 1/23843   | 0.019712 | 0.365555 | 0.342244 | Bmp4        |
| GO_BP_m2GO:20000C | negative re  | 1/470 | 1/23843   | 0.019712 | 0.365555 | 0.342244 | Bmp4        |
| GO_BP_m2GO:20000C | regulation   | 1/470 | 1/23843   | 0.019712 | 0.365555 | 0.342244 | Bmp4        |
| GO_BP_m2GO:20000C | negative re  | 1/470 | 1/23843   | 0.019712 | 0.365555 | 0.342244 | Bmp4        |
| GO_BP_m2GO:200017 | regulation   | 1/470 | 1/23843   | 0.019712 | 0.365555 | 0.342244 | Zbtb1       |
| GO_BP_m2GO:200017 | positive re  | 1/470 | 1/23843   | 0.019712 | 0.365555 | 0.342244 | Zbtb1       |
| GO_BP_m2GO:00506E | negative re  | 7/470 | 138/23843 | 0.019776 | 0.365555 | 0.342244 | Bmp4/lft12  |
| GO_BP_m2GO:00709E | demethylat   | 4/470 | 53/23843  | 0.020421 | 0.369792 | 0.346211 | Alkbh4/Hr/  |
| GO_BP_m2GO:19028E | negative re  | 4/470 | 53/23843  | 0.020421 | 0.369792 | 0.346211 | Atf4/Rack1  |
| GO_BP_m2GO:000647 | protein me   | 8/470 | 171/23843 | 0.020446 | 0.369792 | 0.346211 | Auts2/Hist. |
| GO_BP_m2GO:000821 | protein alk  | 8/470 | 171/23843 | 0.020446 | 0.369792 | 0.346211 | Auts2/Hist. |
| GO_BP_m2GO:004259 | response tr  | 8/470 | 171/23843 | 0.020446 | 0.369792 | 0.346211 | Atf4/Cad/F  |
| GO_BP_m2GO:00703C | cellular res | 5/470 | 80/23843  | 0.020952 | 0.377316 | 0.353255 | Ect2/Rack1  |
| GO_BP_m2GO:004802 | regulation   | 5/470 | 81/23843  | 0.021981 | 0.386164 | 0.361538 | Dyrk1a/Hn   |
| GO_BP_m2GO:00351C | appendage    | 8/470 | 174/23843 | 0.022417 | 0.386164 | 0.361538 | Aff3/Bmp4.  |
| GO_BP_m2GO:00351C | limb morpl   | 8/470 | 174/23843 | 0.022417 | 0.386164 | 0.361538 | Aff3/Bmp4.  |
| GO_BP_m2GO:001834 | protein pre  | 2/470 | 12/23843  | 0.022456 | 0.386164 | 0.361538 | Agrn/Cox1   |
| GO_BP_m2GO:001962 | urea metak   | 2/470 | 12/23843  | 0.022456 | 0.386164 | 0.361538 | Cad/Cebp    |

|                                     |           |          |          |          |             |
|-------------------------------------|-----------|----------|----------|----------|-------------|
| GO_BP_m2GO:004594positive reç2/470  | 12/23843  | 0.022456 | 0.386164 | 0.361538 | Cebpa/Ell   |
| GO_BP_m2GO:00468Einositol phç2/470  | 12/23843  | 0.022456 | 0.386164 | 0.361538 | Mtmr2/Mtr   |
| GO_BP_m2GO:00487Ecardiac mu2/470    | 12/23843  | 0.022456 | 0.386164 | 0.361538 | Bmp4/Myh    |
| GO_BP_m2GO:00703Ehepatocyte2/470    | 12/23843  | 0.022456 | 0.386164 | 0.361538 | Bmp4/Foxç   |
| GO_BP_m2GO:00712Ecellular resç2/470 | 12/23843  | 0.022456 | 0.386164 | 0.361538 | Cebpa/Id2   |
| GO_BP_m2GO:00973Eprenylator2/470    | 12/23843  | 0.022456 | 0.386164 | 0.361538 | Agrn/Cox1   |
| GO_BP_m2GO:00158Cneutral am3/470    | 31/23843  | 0.022733 | 0.388014 | 0.363271 | Slc25a38/S  |
| GO_BP_m2GO:004254response tr6/470   | 111/23843 | 0.022748 | 0.388014 | 0.363271 | Ect2/Rack1  |
| GO_BP_m2GO:00434Eregulation 5/470   | 82/23843  | 0.023042 | 0.390357 | 0.365464 | Elavl1/Metl |
| GO_BP_m2GO:00380Epeptidyl-ty4/470   | 55/23843  | 0.023072 | 0.390357 | 0.365464 | Csk/Dyrk1ç  |
| GO_BP_m2GO:00432Eregulation 15/470  | 429/23843 | 0.023999 | 0.391862 | 0.366873 | Cebpa/Csf   |
| GO_BP_m2GO:009027positive reç6/470  | 113/23843 | 0.024578 | 0.391862 | 0.366873 | Glul/Oxct1  |
| GO_BP_m2GO:008502extracellula3/470  | 32/23843  | 0.024727 | 0.391862 | 0.366873 | Fam234b/M   |
| GO_BP_m2GO:00650Cprotein-D18/470    | 178/23843 | 0.025248 | 0.391862 | 0.366873 | Asf1a/Chaf  |
| GO_BP_m2GO:00015Eluteinizatio2/470  | 13/23843  | 0.026197 | 0.391862 | 0.366873 | Gdf9/Sgpl1  |
| GO_BP_m2GO:001022response tr2/470   | 13/23843  | 0.026197 | 0.391862 | 0.366873 | Cebpa/Id2   |
| GO_BP_m2GO:00331Ehistone H32/470    | 13/23843  | 0.026197 | 0.391862 | 0.366873 | Hr/Kdm3a    |
| GO_BP_m2GO:00380Efc receptor2/470   | 13/23843  | 0.026197 | 0.391862 | 0.366873 | Myo1g/Nrç   |
| GO_BP_m2GO:00397Cviral buddii2/470  | 13/23843  | 0.026197 | 0.391862 | 0.366873 | Chmp3/Tsç   |
| GO_BP_m2GO:006027embryonic 2/470    | 13/23843  | 0.026197 | 0.391862 | 0.366873 | Bmp4/Col2   |
| GO_BP_m2GO:00609Enegative re2/470   | 13/23843  | 0.026197 | 0.391862 | 0.366873 | Dnd1/Elavl  |
| GO_BP_m2GO:007102nuclear RN2/470    | 13/23843  | 0.026197 | 0.391862 | 0.366873 | Exosc2/Xrn  |
| GO_BP_m2GO:007102nuclear mF2/470    | 13/23843  | 0.026197 | 0.391862 | 0.366873 | Exosc2/Xrn  |
| GO_BP_m2GO:007171ER-associa2/470    | 13/23843  | 0.026197 | 0.391862 | 0.366873 | Derl1/Sdf2  |
| GO_BP_m2GO:00905C RNA phosç2/470    | 13/23843  | 0.026197 | 0.391862 | 0.366873 | Exosc2/Xrn  |
| GO_BP_m2GO:00105Eregulation 3/470   | 33/23843  | 0.026812 | 0.391862 | 0.366873 | Auts2/Racç  |
| GO_BP_m2GO:00430CGolgi to plç3/470  | 33/23843  | 0.026812 | 0.391862 | 0.366873 | Csk/Rack1/  |
| GO_BP_m2GO:004852positive reç3/470  | 33/23843  | 0.026812 | 0.391862 | 0.366873 | Agrp/Nr4a   |
| GO_BP_m2GO:19032Cregulation 3/470   | 33/23843  | 0.026812 | 0.391862 | 0.366873 | Rack1/Nrç   |
| GO_BP_m2GO:00170Eprotein imç9/470   | 215/23843 | 0.027331 | 0.391862 | 0.366873 | Bmp4/Ect2   |
| GO_BP_m2GO:190134negative re6/470   | 116/23843 | 0.027502 | 0.391862 | 0.366873 | Angpt4/Bn   |
| GO_BP_m2GO:00063Echromatin 7/470    | 148/23843 | 0.027674 | 0.391862 | 0.366873 | Actl6b/Asf  |
| GO_BP_m2GO:00513Cregulation 7/470   | 148/23843 | 0.027674 | 0.391862 | 0.366873 | Aurkb/Chr   |
| GO_BP_m2GO:007177response tr8/470   | 182/23843 | 0.028319 | 0.391862 | 0.366873 | Bmp4/Col2   |
| GO_BP_m2GO:007177cellular resç8/470 | 182/23843 | 0.028319 | 0.391862 | 0.366873 | Bmp4/Col2   |
| GO_BP_m2GO:00100Eresponse tr15/470  | 439/23843 | 0.028637 | 0.391862 | 0.366873 | Aco1/Alad   |
| GO_BP_m2GO:00061Epurine nucç3/470   | 34/23843  | 0.028987 | 0.391862 | 0.366873 | Rack1/Pde   |
| GO_BP_m2GO:003511embryonic 3/470    | 34/23843  | 0.028987 | 0.391862 | 0.366873 | Aff3/Bmp4   |
| GO_BP_m2GO:00316Ecellular resç9/470 | 218/23843 | 0.029509 | 0.391862 | 0.366873 | Atf4/Fads1  |
| GO_BP_m2GO:19011Ecarbohydrç6/470    | 118/23843 | 0.029574 | 0.391862 | 0.366873 | Gba2/Rack   |
| GO_BP_m2GO:001042hydrogen ç2/470    | 14/23843  | 0.03017  | 0.391862 | 0.366873 | Pdcd10/Pir  |
| GO_BP_m2GO:001697poly(A)+ rç2/470   | 14/23843  | 0.03017  | 0.391862 | 0.366873 | Pabpn1/Zc   |
| GO_BP_m2GO:00468Ephosphory2/470     | 14/23843  | 0.03017  | 0.391862 | 0.366873 | Mtmr2/Mtr   |
| GO_BP_m2GO:00704Eleukocyte ç2/470   | 14/23843  | 0.03017  | 0.391862 | 0.366873 | Nr4a3/Racç  |
| GO_BP_m2GO:007154inositol phç2/470  | 14/23843  | 0.03017  | 0.391862 | 0.366873 | Mtmr2/Mtr   |
| GO_BP_m2GO:007194nitrogen cy2/470   | 14/23843  | 0.03017  | 0.391862 | 0.366873 | Cad/Cebpç   |
| GO_BP_m2GO:00974Eprogrammç2/470     | 14/23843  | 0.03017  | 0.391862 | 0.366873 | Pdcd10/Pir  |
| GO_BP_m2GO:20003Eregulation 2/470   | 14/23843  | 0.03017  | 0.391862 | 0.366873 | Arap3/Syt1  |

|                                      |           |          |          |          |              |
|--------------------------------------|-----------|----------|----------|----------|--------------|
| GO_BP_m2GO:000151RNA methy4/470      | 60/23843  | 0.030576 | 0.391862 | 0.366873 | Ftsj1/Mettl  |
| GO_BP_m2GO:00434Eregulation 6/470    | 119/23843 | 0.030647 | 0.391862 | 0.366873 | Clk1/Dyrk1   |
| GO_BP_m2GO:19013Eorganic cyc16/470   | 483/23843 | 0.031128 | 0.391862 | 0.366873 | Dhx34/Elav   |
| GO_BP_m2GO:00519Epositive reç3/470   | 35/23843  | 0.031254 | 0.391862 | 0.366873 | Glul/Ptk2b,  |
| GO_BP_m2GO:20010Eregulation 3/470    | 35/23843  | 0.031254 | 0.391862 | 0.366873 | Rack1/Nr4E   |
| GO_BP_m2GO:00092Ecellular resç7/470  | 152/23843 | 0.031359 | 0.391862 | 0.366873 | Atf4/Fads1   |
| GO_BP_m2GO:00331Eregulation 7/470    | 152/23843 | 0.031359 | 0.391862 | 0.366873 | Rack1/Gpd    |
| GO_BP_m2GO:00364Ecell death i5/470   | 89/23843  | 0.0314   | 0.391862 | 0.366873 | Atf4/Rack1   |
| GO_BP_m2GO:00160E7rRNA meta9/470     | 221/23843 | 0.031805 | 0.391862 | 0.366873 | Chd7/Exos    |
| GO_BP_m2GO:00603Eregulation 4/470    | 61/23843  | 0.03223  | 0.391862 | 0.366873 | Bmp4/GdfE    |
| GO_BP_m2GO:00506Enucleic acic7/470   | 153/23843 | 0.032329 | 0.391862 | 0.366873 | Hnrnpa2b1    |
| GO_BP_m2GO:00506E7RNA transç7/470    | 153/23843 | 0.032329 | 0.391862 | 0.366873 | Hnrnpa2b1    |
| GO_BP_m2GO:00159EnucleobaseE8/470    | 188/23843 | 0.033396 | 0.391862 | 0.366873 | Hnrnpa2b1    |
| GO_BP_m2GO:00302E2macrophaç3/470     | 36/23843  | 0.03361  | 0.391862 | 0.366873 | Bmp4/Ceb     |
| GO_BP_m2GO:00034Cneural retir4/470   | 62/23843  | 0.033935 | 0.391862 | 0.366873 | Irx5/Ptprm,  |
| GO_BP_m2GO:00064C7RNA localiz8/470   | 189/23843 | 0.034299 | 0.391862 | 0.366873 | Exosc2/Hni   |
| GO_BP_m2GO:00097E5hormone-r8/470     | 189/23843 | 0.034299 | 0.391862 | 0.366873 | Agrp/BmpE    |
| GO_BP_m2GO:00090Ebranched-r2/470     | 15/23843  | 0.034365 | 0.391862 | 0.366873 | Hmgcl/lvd    |
| GO_BP_m2GO:00170Cantibiotic t2/470   | 15/23843  | 0.034365 | 0.391862 | 0.366873 | Cybb/Kdm,    |
| GO_BP_m2GO:004351negative re2/470    | 15/23843  | 0.034365 | 0.391862 | 0.366873 | Dyrk1a/Pct   |
| GO_BP_m2GO:00452EmRNA cis E2/470     | 15/23843  | 0.034365 | 0.391862 | 0.366873 | Ncbp2/Wb     |
| GO_BP_m2GO:004871negative re2/470    | 15/23843  | 0.034365 | 0.391862 | 0.366873 | Bmp4/Id2     |
| GO_BP_m2GO:006014negative re2/470    | 15/23843  | 0.034365 | 0.391862 | 0.366873 | Dnd1/Elavl   |
| GO_BP_m2GO:00607Cregulation 2/470    | 15/23843  | 0.034365 | 0.391862 | 0.366873 | Oas1b/Oas    |
| GO_BP_m2GO:00609Enegative re2/470    | 15/23843  | 0.034365 | 0.391862 | 0.366873 | Dnd1/Elavl   |
| GO_BP_m2GO:00710E2RNA survei2/470    | 15/23843  | 0.034365 | 0.391862 | 0.366873 | Exosc2/Xrn   |
| GO_BP_m2GO:00724Eembryonic 2/470     | 15/23843  | 0.034365 | 0.391862 | 0.366873 | Bmp4/Col2    |
| GO_BP_m2GO:00344E7ncRNA pro12/470    | 335/23843 | 0.034812 | 0.391862 | 0.366873 | Chd7/Exos    |
| GO_BP_m2GO:00512Eestablishmç7/470    | 156/23843 | 0.035359 | 0.391862 | 0.366873 | Hnrnpa2b1    |
| GO_BP_m2GO:00064C7RNA expor5/470     | 92/23843  | 0.035494 | 0.391862 | 0.366873 | Hnrnpa2b1    |
| GO_BP_m2GO:00067E7porphyrin- 3/470   | 37/23843  | 0.036057 | 0.391862 | 0.366873 | Alad/Cox1E   |
| GO_BP_m2GO:00711E5positive reç3/470  | 37/23843  | 0.036057 | 0.391862 | 0.366873 | Foxo4/Id2/   |
| GO_BP_m2GO:20010E2negative re3/470   | 37/23843  | 0.036057 | 0.391862 | 0.366873 | Rack1/Nr4E   |
| GO_BP_m2GO:00070Cmitochond 5/470     | 93/23843  | 0.036928 | 0.391862 | 0.366873 | Bloc1s2/He   |
| GO_BP_m2GO:00434Eregulation 5/470    | 93/23843  | 0.036928 | 0.391862 | 0.366873 | Elavl1/Mettl |
| GO_BP_m2GO:00453Ecellular resç7/470  | 158/23843 | 0.03748  | 0.391862 | 0.366873 | Aco1/Adsl/   |
| GO_BP_m2GO:00017Cmesoderm 4/470      | 64/23843  | 0.037501 | 0.391862 | 0.366873 | Bmp4/Nr4E    |
| GO_BP_m2GO:00603Epathway-rE4/470     | 64/23843  | 0.037501 | 0.391862 | 0.366873 | Bmp4/GdfE    |
| GO_BP_m2GO:00713Ecellular resç4/470  | 64/23843  | 0.037501 | 0.391862 | 0.366873 | Bmp4/Hnrr    |
| GO_BP_m2GO:199054mitochond 4/470     | 64/23843  | 0.037501 | 0.391862 | 0.366873 | Slc25a28/S   |
| GO_BP_m2GO:19038E2positive reç12/470 | 340/23843 | 0.038281 | 0.391862 | 0.366873 | Crocc/Ect2   |
| GO_BP_m2GO:00063Eregulation 2/470    | 16/23843  | 0.038772 | 0.391862 | 0.366873 | Cebpa/Ell    |
| GO_BP_m2GO:00067E4ubiquinoneE2/470   | 16/23843  | 0.038772 | 0.391862 | 0.366873 | Coq8b/Coc    |
| GO_BP_m2GO:00219E7telencepha2/470    | 16/23843  | 0.038772 | 0.391862 | 0.366873 | Bmp4/Six3    |
| GO_BP_m2GO:00467E5viral buddii2/470  | 16/23843  | 0.038772 | 0.391862 | 0.366873 | Chmp3/Tsç    |
| GO_BP_m2GO:00482Enegative re2/470    | 16/23843  | 0.038772 | 0.391862 | 0.366873 | Mtmr2/Syt    |
| GO_BP_m2GO:00713Ecellular resç2/470  | 16/23843  | 0.038772 | 0.391862 | 0.366873 | Mavs/Ralb    |
| GO_BP_m2GO:19016E6quinone bi2/470    | 16/23843  | 0.038772 | 0.391862 | 0.366873 | Coq8b/Coc    |

|                               |       |          |          |          |          |             |
|-------------------------------|-------|----------|----------|----------|----------|-------------|
| GO_BP_m2GO:19021εpositive reç | 2/470 | 16/23843 | 0.038772 | 0.391862 | 0.366873 | Chmp3/Tsc   |
| GO_BP_m2GO:19042εnegative re  | 2/470 | 16/23843 | 0.038772 | 0.391862 | 0.366873 | Gatsl2/Itfg |
| GO_BP_m2GO:200034regulation   | 2/470 | 16/23843 | 0.038772 | 0.391862 | 0.366873 | Plau/Sulf2  |
| GO_BP_m2GO:00015εoocyte gro   | 1/470 | 2/23843  | 0.039037 | 0.391862 | 0.366873 | Gdf9        |
| GO_BP_m2GO:00019εregulation   | 1/470 | 2/23843  | 0.039037 | 0.391862 | 0.366873 | Ralb        |
| GO_BP_m2GO:00019εthigmotaxi   | 1/470 | 2/23843  | 0.039037 | 0.391862 | 0.366873 | Id2         |
| GO_BP_m2GO:00030εregulation   | 1/470 | 2/23843  | 0.039037 | 0.391862 | 0.366873 | Rasl10b     |
| GO_BP_m2GO:00034Coptic vesicl | 1/470 | 2/23843  | 0.039037 | 0.391862 | 0.366873 | Six3        |
| GO_BP_m2GO:00064εglutamyl-tl  | 1/470 | 2/23843  | 0.039037 | 0.391862 | 0.366873 | Eprs        |
| GO_BP_m2GO:00064εtryptophan   | 1/470 | 2/23843  | 0.039037 | 0.391862 | 0.366873 | Wars2       |
| GO_BP_m2GO:000654glutamine    | 1/470 | 2/23843  | 0.039037 | 0.391862 | 0.366873 | Glul        |
| GO_BP_m2GO:00067εheme a bic   | 1/470 | 2/23843  | 0.039037 | 0.391862 | 0.366873 | Cox10       |
| GO_BP_m2GO:000717signal com   | 1/470 | 2/23843  | 0.039037 | 0.391862 | 0.366873 | Ptk2b       |
| GO_BP_m2GO:000922nucleotide·  | 1/470 | 2/23843  | 0.039037 | 0.391862 | 0.366873 | Mgat1       |
| GO_BP_m2GO:00107εregulation   | 1/470 | 2/23843  | 0.039037 | 0.391862 | 0.366873 | Ptk2b       |
| GO_BP_m2GO:001484esophagus    | 1/470 | 2/23843  | 0.039037 | 0.391862 | 0.366873 | Sulf2       |
| GO_BP_m2GO:00158C aromatic ai | 1/470 | 2/23843  | 0.039037 | 0.391862 | 0.366873 | Slc36a4     |
| GO_BP_m2GO:00158εtryptophan   | 1/470 | 2/23843  | 0.039037 | 0.391862 | 0.366873 | Slc36a4     |
| GO_BP_m2GO:00160εtRNA impo    | 1/470 | 2/23843  | 0.039037 | 0.391862 | 0.366873 | Tomm20      |
| GO_BP_m2GO:001814keratan sul  | 1/470 | 2/23843  | 0.039037 | 0.391862 | 0.366873 | Chst5       |
| GO_BP_m2GO:00215εabducens r   | 1/470 | 2/23843  | 0.039037 | 0.391862 | 0.366873 | Mafb        |
| GO_BP_m2GO:00215εabducens r   | 1/470 | 2/23843  | 0.039037 | 0.391862 | 0.366873 | Mafb        |
| GO_BP_m2GO:00215εabducens r   | 1/470 | 2/23843  | 0.039037 | 0.391862 | 0.366873 | Mafb        |
| GO_BP_m2GO:003004actin modifi | 1/470 | 2/23843  | 0.039037 | 0.391862 | 0.366873 | Twf1        |
| GO_BP_m2GO:00308C regulation  | 1/470 | 2/23843  | 0.039037 | 0.391862 | 0.366873 | Rack1       |
| GO_BP_m2GO:00308εregulation   | 1/470 | 2/23843  | 0.039037 | 0.391862 | 0.366873 | Rack1       |
| GO_BP_m2GO:003221riboflavin t | 1/470 | 2/23843  | 0.039037 | 0.391862 | 0.366873 | Slc52a3     |
| GO_BP_m2GO:00327εpositive reç | 1/470 | 2/23843  | 0.039037 | 0.391862 | 0.366873 | Nr4a3       |
| GO_BP_m2GO:00331εregulation   | 1/470 | 2/23843  | 0.039037 | 0.391862 | 0.366873 | Rack1       |
| GO_BP_m2GO:00342εenkephalin   | 1/470 | 2/23843  | 0.039037 | 0.391862 | 0.366873 | Pcsk2       |
| GO_BP_m2GO:00360εcleavage ft  | 1/470 | 2/23843  | 0.039037 | 0.391862 | 0.366873 | Alkbh4      |
| GO_BP_m2GO:00362ε7-methylg    | 1/470 | 2/23843  | 0.039037 | 0.391862 | 0.366873 | Tgs1        |
| GO_BP_m2GO:00364εneuron intr  | 1/470 | 2/23843  | 0.039037 | 0.391862 | 0.366873 | Pink1       |
| GO_BP_m2GO:00426εcellular res | 1/470 | 2/23843  | 0.039037 | 0.391862 | 0.366873 | Sipa1       |
| GO_BP_m2GO:004294D-serine tr  | 1/470 | 2/23843  | 0.039037 | 0.391862 | 0.366873 | Slc7a10     |
| GO_BP_m2GO:00458εpositive reç | 1/470 | 2/23843  | 0.039037 | 0.391862 | 0.366873 | Agrn        |
| GO_BP_m2GO:00461εheme a mε    | 1/470 | 2/23843  | 0.039037 | 0.391862 | 0.366873 | Cox10       |
| GO_BP_m2GO:00461εglycerol-3-  | 1/470 | 2/23843  | 0.039037 | 0.391862 | 0.366873 | Gpd1l       |
| GO_BP_m2GO:00482εiron import  | 1/470 | 2/23843  | 0.039037 | 0.391862 | 0.366873 | Slc25a28    |
| GO_BP_m2GO:00483εintermedia   | 1/470 | 2/23843  | 0.039037 | 0.391862 | 0.366873 | Bmp4        |
| GO_BP_m2GO:00486εnegative re  | 1/470 | 2/23843  | 0.039037 | 0.391862 | 0.366873 | Tll2        |
| GO_BP_m2GO:005134positive reç | 1/470 | 2/23843  | 0.039037 | 0.391862 | 0.366873 | Rack1       |
| GO_BP_m2GO:00601εcloacal sep  | 1/470 | 2/23843  | 0.039037 | 0.391862 | 0.366873 | Bmp4        |
| GO_BP_m2GO:00609εregulation   | 1/470 | 2/23843  | 0.039037 | 0.391862 | 0.366873 | Bmp4        |
| GO_BP_m2GO:006101snRNA imp    | 1/470 | 2/23843  | 0.039037 | 0.391862 | 0.366873 | Ran         |
| GO_BP_m2GO:00612εpattern spε  | 1/470 | 2/23843  | 0.039037 | 0.391862 | 0.366873 | Bmp4        |
| GO_BP_m2GO:00617εmultivesicu  | 1/470 | 2/23843  | 0.039037 | 0.391862 | 0.366873 | Chmp3       |
| GO_BP_m2GO:00700εmitochond    | 1/470 | 2/23843  | 0.039037 | 0.391862 | 0.366873 | Tomm20      |

|                                     |           |          |          |          |             |
|-------------------------------------|-----------|----------|----------|----------|-------------|
| GO_BP_m2GO:007103nuclear mR1/470    | 2/23843   | 0.039037 | 0.391862 | 0.366873 | Exosc2      |
| GO_BP_m2GO:007104nuclear retr1/470  | 2/23843   | 0.039037 | 0.391862 | 0.366873 | Exosc2      |
| GO_BP_m2GO:007205anterior/pc1/470   | 2/23843   | 0.039037 | 0.391862 | 0.366873 | Bmp4        |
| GO_BP_m2GO:007227metaneph1/470      | 2/23843   | 0.039037 | 0.391862 | 0.366873 | Bmp4        |
| GO_BP_m2GO:009708methyl-br1/470     | 2/23843   | 0.039037 | 0.391862 | 0.366873 | Slc27a2     |
| GO_BP_m2GO:009740neuroblast 1/470   | 2/23843   | 0.039037 | 0.391862 | 0.366873 | Six3        |
| GO_BP_m2GO:190006regulation 1/470   | 2/23843   | 0.039037 | 0.391862 | 0.366873 | Mavs        |
| GO_BP_m2GO:190189negative re1/470   | 2/23843   | 0.039037 | 0.391862 | 0.366873 | Pde4d       |
| GO_BP_m2GO:190230negative re1/470   | 2/23843   | 0.039037 | 0.391862 | 0.366873 | Kcnh2       |
| GO_BP_m2GO:190234negative re1/470   | 2/23843   | 0.039037 | 0.391862 | 0.366873 | H3f3b       |
| GO_BP_m2GO:190235Notch sign 1/470   | 2/23843   | 0.039037 | 0.391862 | 0.366873 | Lfng        |
| GO_BP_m2GO:190236regulation 1/470   | 2/23843   | 0.039037 | 0.391862 | 0.366873 | Lfng        |
| GO_BP_m2GO:190236negative re1/470   | 2/23843   | 0.039037 | 0.391862 | 0.366873 | Lfng        |
| GO_BP_m2GO:190246regulation 1/470   | 2/23843   | 0.039037 | 0.391862 | 0.366873 | Bmp4        |
| GO_BP_m2GO:190246positive re1/470   | 2/23843   | 0.039037 | 0.391862 | 0.366873 | Bmp4        |
| GO_BP_m2GO:190295positive re1/470   | 2/23843   | 0.039037 | 0.391862 | 0.366873 | Pink1       |
| GO_BP_m2GO:190338regulation 1/470   | 2/23843   | 0.039037 | 0.391862 | 0.366873 | Pink1       |
| GO_BP_m2GO:190338negative re1/470   | 2/23843   | 0.039037 | 0.391862 | 0.366873 | Pink1       |
| GO_BP_m2GO:190340regulation 1/470   | 2/23843   | 0.039037 | 0.391862 | 0.366873 | Agrn        |
| GO_BP_m2GO:190424regulation 1/470   | 2/23843   | 0.039037 | 0.391862 | 0.366873 | Pabpn1      |
| GO_BP_m2GO:190516protein loc 1/470  | 2/23843   | 0.039037 | 0.391862 | 0.366873 | Syt11       |
| GO_BP_m2GO:190516regulation 1/470   | 2/23843   | 0.039037 | 0.391862 | 0.366873 | Syt11       |
| GO_BP_m2GO:190517positive re1/470   | 2/23843   | 0.039037 | 0.391862 | 0.366873 | Syt11       |
| GO_BP_m2GO:190522clathrin-co 1/470  | 2/23843   | 0.039037 | 0.391862 | 0.366873 | Syt11       |
| GO_BP_m2GO:190566regulation 1/470   | 2/23843   | 0.039037 | 0.391862 | 0.366873 | Hnrnpa2b1   |
| GO_BP_m2GO:190566positive re1/470   | 2/23843   | 0.039037 | 0.391862 | 0.366873 | Hnrnpa2b1   |
| GO_BP_m2GO:199042miRNA trar1/470    | 2/23843   | 0.039037 | 0.391862 | 0.366873 | Hnrnpa2b1   |
| GO_BP_m2GO:199092calcium ior 1/470  | 2/23843   | 0.039037 | 0.391862 | 0.366873 | Syt11       |
| GO_BP_m2GO:200013negative re1/470   | 2/23843   | 0.039037 | 0.391862 | 0.366873 | Bmp4        |
| GO_BP_m2GO:200039regulation 1/470   | 2/23843   | 0.039037 | 0.391862 | 0.366873 | Tsg101      |
| GO_BP_m2GO:200039positive re1/470   | 2/23843   | 0.039037 | 0.391862 | 0.366873 | Tsg101      |
| GO_BP_m2GO:200053regulation 1/470   | 2/23843   | 0.039037 | 0.391862 | 0.366873 | Ptk2b       |
| GO_BP_m2GO:200053positive re1/470   | 2/23843   | 0.039037 | 0.391862 | 0.366873 | Ptk2b       |
| GO_BP_m2GO:200053regulation 1/470   | 2/23843   | 0.039037 | 0.391862 | 0.366873 | Agrn        |
| GO_BP_m2GO:200054positive re1/470   | 2/23843   | 0.039037 | 0.391862 | 0.366873 | Agrn        |
| GO_BP_m2GO:200062positive re1/470   | 2/23843   | 0.039037 | 0.391862 | 0.366873 | Auts2       |
| GO_BP_m2GO:005105negative re16/470  | 498/23843 | 0.039364 | 0.394199 | 0.369061 | Acsl4/Agrn  |
| GO_BP_m2GO:000660protein im7/470    | 160/23843 | 0.039683 | 0.396448 | 0.371166 | Bmp4/Ect2   |
| GO_BP_m2GO:000002ribosomal l3/470   | 39/23843  | 0.041216 | 0.406536 | 0.380611 | Fastkd2/Mi  |
| GO_BP_m2GO:004327apoptotic c3/470   | 39/23843  | 0.041216 | 0.406536 | 0.380611 | Jmjd6/Rac2  |
| GO_BP_m2GO:006096regulation 3/470   | 39/23843  | 0.041216 | 0.406536 | 0.380611 | Bmp4/Dnd    |
| GO_BP_m2GO:000691nucleocyto 11/470  | 306/23843 | 0.041241 | 0.406536 | 0.380611 | Bmp4/Ect2   |
| GO_BP_m2GO:000333amino acid4/470    | 66/23843  | 0.041274 | 0.406536 | 0.380611 | Slc6a21/Slc |
| GO_BP_m2GO:003096endoplasm4/470     | 66/23843  | 0.041274 | 0.406536 | 0.380611 | Atf4/Derl1/ |
| GO_BP_m2GO:004866positive re5/470   | 96/23843  | 0.041441 | 0.407232 | 0.381263 | Bmp4/Id2/   |
| GO_BP_m2GO:004851rhythmic p 10/470  | 269/23843 | 0.041576 | 0.407599 | 0.381607 | Atf4/Cry1/  |
| GO_BP_m2GO:005116nuclear tra11/470  | 307/23843 | 0.042052 | 0.408503 | 0.382452 | Bmp4/Ect2   |
| GO_BP_m2GO:000652cellular am 10/470 | 270/23843 | 0.042452 | 0.408503 | 0.382452 | Cad/Kyat3/  |



|                                      |           |          |          |          |             |
|--------------------------------------|-----------|----------|----------|----------|-------------|
| GO_BP_m2GO:00072εgerm cell d10/470   | 270/23843 | 0.042452 | 0.408503 | 0.382452 | Bmp4/Dnd    |
| GO_BP_m2GO:20012εnegative re5/470    | 97/23843  | 0.043017 | 0.408503 | 0.382452 | Bmp4/Col2   |
| GO_BP_m2GO:00106εnegative re4/470    | 67/23843  | 0.043238 | 0.408503 | 0.382452 | Angpt4/Mc   |
| GO_BP_m2GO:00456εpositive re4/470    | 67/23843  | 0.043238 | 0.408503 | 0.382452 | Bmp4/Ceb    |
| GO_BP_m2GO:000204blood vess2/470     | 17/23843  | 0.04338  | 0.408503 | 0.382452 | Bmp4/Pdca   |
| GO_BP_m2GO:000674ubiquinone2/470     | 17/23843  | 0.04338  | 0.408503 | 0.382452 | Coq8b/Coc   |
| GO_BP_m2GO:00090εglutamine 2/470     | 17/23843  | 0.04338  | 0.408503 | 0.382452 | Cad/Glul    |
| GO_BP_m2GO:003502regulation 2/470    | 17/23843  | 0.04338  | 0.408503 | 0.382452 | Arap3/Auts  |
| GO_BP_m2GO:200064regulation 2/470    | 17/23843  | 0.04338  | 0.408503 | 0.382452 | Chmp3/Mt    |
| GO_BP_m2GO:00099εresponse tr13/470   | 386/23843 | 0.04372  | 0.408503 | 0.382452 | Adsl/Alad/  |
| GO_BP_m2GO:00487εappendage8/470      | 199/23843 | 0.044243 | 0.408503 | 0.382452 | Aff3/Bmp4   |
| GO_BP_m2GO:006017limb develk8/470    | 199/23843 | 0.044243 | 0.408503 | 0.382452 | Aff3/Bmp4   |
| GO_BP_m2GO:005117import intc7/470    | 164/23843 | 0.044338 | 0.408503 | 0.382452 | Bmp4/Ect2   |
| GO_BP_m2GO:00066εfatty acid b4/470   | 68/23843  | 0.045253 | 0.408503 | 0.382452 | Acat2/Echc  |
| GO_BP_m2GO:00483εmesoderm 4/470      | 68/23843  | 0.045253 | 0.408503 | 0.382452 | Bmp4/Nr4ε   |
| GO_BP_m2GO:00020εchondrocyt5/470     | 99/23843  | 0.046274 | 0.408503 | 0.382452 | Bmp4/Col2   |
| GO_BP_m2GO:00193εfatty acid o5/470   | 99/23843  | 0.046274 | 0.408503 | 0.382452 | Acat2/Echc  |
| GO_BP_m2GO:000717epidermal 5/470     | 100/23843 | 0.047957 | 0.408503 | 0.382452 | Aplp2/Carr  |
| GO_BP_m2GO:000171mesoderm 2/470      | 18/23843  | 0.048179 | 0.408503 | 0.382452 | Bmp4/Sfrp   |
| GO_BP_m2GO:00108εregulation 2/470    | 18/23843  | 0.048179 | 0.408503 | 0.382452 | Chd7/Pde4   |
| GO_BP_m2GO:001607rRNA catak2/470     | 18/23843  | 0.048179 | 0.408503 | 0.382452 | Exosc2/Xrn  |
| GO_BP_m2GO:00345Cprotein loc2/470    | 18/23843  | 0.048179 | 0.408503 | 0.382452 | Aurkb/Traβ  |
| GO_BP_m2GO:004617polyol cata2/470    | 18/23843  | 0.048179 | 0.408503 | 0.382452 | Mttr2/Mtr   |
| GO_BP_m2GO:19028εregulation 2/470    | 18/23843  | 0.048179 | 0.408503 | 0.382452 | Mir129-2/ε  |
| GO_BP_m2GO:190342regulation 2/470    | 18/23843  | 0.048179 | 0.408503 | 0.382452 | Sh3gl1/Syt  |
| GO_BP_m2GO:00485εcamera-tyr6/470     | 133/23843 | 0.048386 | 0.408503 | 0.382452 | Bmp4/lft12  |
| GO_BP_m2GO:001032membrane 8/470      | 203/23843 | 0.048702 | 0.408503 | 0.382452 | Alkbh4/Au   |
| GO_BP_m2GO:00302εlipid modif 8/470   | 203/23843 | 0.048702 | 0.408503 | 0.382452 | Acat2/Echc  |
| GO_BP_m2GO:003241lysosome lk4/470    | 70/23843  | 0.04944  | 0.408503 | 0.382452 | Bloc1s2/Nr  |
| GO_BP_m2GO:006014regulation 3/470    | 42/23843  | 0.049609 | 0.408503 | 0.382452 | Bmp4/Dnd    |
| GO_BP_m2GO:00609εregulation 3/470    | 42/23843  | 0.049609 | 0.408503 | 0.382452 | Bmp4/Dnd    |
| GO_BP_m2GO:00315εactin cytosl5/470   | 101/23843 | 0.049675 | 0.408503 | 0.382452 | Auts2/Farp  |
| GO_BP_m2GO:003444lipid oxidat5/470   | 101/23843 | 0.049675 | 0.408503 | 0.382452 | Acat2/Echc  |
| GO_BP_m2GO:00359εcellular resl5/470  | 101/23843 | 0.049675 | 0.408503 | 0.382452 | Atf4/Derl1/ |
| GO_BP_m2GO:00423εregulation 14/470   | 434/23843 | 0.050201 | 0.408503 | 0.382452 | Agrn/Rack:  |
| GO_BP_m2GO:00335Ccarbohydrε9/470     | 241/23843 | 0.050328 | 0.408503 | 0.382452 | Aspscr1/Cε  |
| GO_BP_m2GO:00425εglucose ho9/470     | 241/23843 | 0.050328 | 0.408503 | 0.382452 | Aspscr1/Cε  |
| GO_BP_m2GO:00714εcellular resl10/470 | 279/23843 | 0.050911 | 0.408503 | 0.382452 | Atf4/Fads1  |
| GO_BP_m2GO:00310εregulation 4/470    | 71/23843  | 0.05161  | 0.408503 | 0.382452 | Auts2/Kdm   |
| GO_BP_m2GO:00328εregulation 4/470    | 71/23843  | 0.05161  | 0.408503 | 0.382452 | Acsl4/Erfe/ |
| GO_BP_m2GO:190331positive re4/470    | 71/23843  | 0.05161  | 0.408503 | 0.382452 | Mettl14/Nc  |
| GO_BP_m2GO:000991hormone tr12/470    | 357/23843 | 0.051883 | 0.408503 | 0.382452 | Chd7/Cry1.  |
| GO_BP_m2GO:19010εregulation 3/470    | 43/23843  | 0.052577 | 0.408503 | 0.382452 | Rack1/Nr4ε  |
| GO_BP_m2GO:190274regulation 3/470    | 43/23843  | 0.052577 | 0.408503 | 0.382452 | Auts2/Rac2  |
| GO_BP_m2GO:00068εamino acid6/470     | 136/23843 | 0.052865 | 0.408503 | 0.382452 | Slc6a21/Gr  |
| GO_BP_m2GO:001657histone me6/470     | 136/23843 | 0.052865 | 0.408503 | 0.382452 | Auts2/Hist: |
| GO_BP_m2GO:00456εregulation 6/470    | 136/23843 | 0.052865 | 0.408503 | 0.382452 | Bmp4/Ceb    |
| GO_BP_m2GO:000652arginine m2/470     | 19/23843  | 0.053162 | 0.408503 | 0.382452 | Cad/Oat     |

|                                    |           |          |          |          |             |
|------------------------------------|-----------|----------|----------|----------|-------------|
| GO_BP_m2GO:000763chemosens2/470    | 19/23843  | 0.053162 | 0.408503 | 0.382452 | Chd7/Lmx1   |
| GO_BP_m2GO:000908branched-r2/470   | 19/23843  | 0.053162 | 0.408503 | 0.382452 | Hmgcl/lvd   |
| GO_BP_m2GO:002169cerebellar l2/470 | 19/23843  | 0.053162 | 0.408503 | 0.382452 | Coq8b/Fair  |
| GO_BP_m2GO:004278mRNA tran2/470    | 19/23843  | 0.053162 | 0.408503 | 0.382452 | Atf4/Zbtb1  |
| GO_BP_m2GO:006012regulation 2/470  | 19/23843  | 0.053162 | 0.408503 | 0.382452 | Chd7/Serp   |
| GO_BP_m2GO:00305CBMP signal7/470   | 171/23843 | 0.053302 | 0.408503 | 0.382452 | Bmp4/Gdff   |
| GO_BP_m2GO:00091Cglycoprote 11/470 | 320/23843 | 0.053611 | 0.408503 | 0.382452 | Chst12/Col  |
| GO_BP_m2GO:004225ribosome e4/470   | 72/23843  | 0.053832 | 0.408503 | 0.382452 | Fastkd2/Mi  |
| GO_BP_m2GO:19032Cregulation 4/470  | 72/23843  | 0.053832 | 0.408503 | 0.382452 | Atf4/Rack1  |
| GO_BP_m2GO:00182Cpeptidyl-se12/470 | 360/23843 | 0.054585 | 0.408503 | 0.382452 | Aurkb/Clk1  |
| GO_BP_m2GO:000599monosaccl9/470    | 246/23843 | 0.055877 | 0.408503 | 0.382452 | Atf4/Cry1/I |
| GO_BP_m2GO:00905CRNA phos4/470     | 73/23843  | 0.056105 | 0.408503 | 0.382452 | Exosc2/Nct  |
| GO_BP_m2GO:00301Cregulation 9/470  | 247/23843 | 0.057033 | 0.408503 | 0.382452 | Arap3/Cskv  |
| GO_BP_m2GO:000688exocytosis 11/470 | 324/23843 | 0.057558 | 0.408503 | 0.382452 | Cplx4/Myo   |
| GO_BP_m2GO:19039Cregulation 6/470  | 139/23843 | 0.057588 | 0.408503 | 0.382452 | Chmp3/Ma    |
| GO_BP_m2GO:000182inner cell n1/470 | 3/23843   | 0.057981 | 0.408503 | 0.382452 | Lats2       |
| GO_BP_m2GO:000182inner cell n1/470 | 3/23843   | 0.057981 | 0.408503 | 0.382452 | Lats2       |
| GO_BP_m2GO:000231germinal c1/470   | 3/23843   | 0.057981 | 0.408503 | 0.382452 | Itfg2       |
| GO_BP_m2GO:000237immunoglc1/470    | 3/23843   | 0.057981 | 0.408503 | 0.382452 | Galnt2      |
| GO_BP_m2GO:000257pro-T cell c1/470 | 3/23843   | 0.057981 | 0.408503 | 0.382452 | Zbtb1       |
| GO_BP_m2GO:000293trabecular i1/470 | 3/23843   | 0.057981 | 0.408503 | 0.382452 | Lmx1b       |
| GO_BP_m2GO:000313BMP signal1/470   | 3/23843   | 0.057981 | 0.408503 | 0.382452 | Bmp4        |
| GO_BP_m2GO:000313endoderm:1/470    | 3/23843   | 0.057981 | 0.408503 | 0.382452 | Bmp4        |
| GO_BP_m2GO:000313endoderm:1/470    | 3/23843   | 0.057981 | 0.408503 | 0.382452 | Bmp4        |
| GO_BP_m2GO:000322right ventri1/470 | 3/23843   | 0.057981 | 0.408503 | 0.382452 | Chd7        |
| GO_BP_m2GO:000599xylulose m1/470   | 3/23843   | 0.057981 | 0.408503 | 0.382452 | Xylb        |
| GO_BP_m2GO:000626pre-replica1/470  | 3/23843   | 0.057981 | 0.408503 | 0.382452 | Wdr18       |
| GO_BP_m2GO:00064CRNA impor1/470    | 3/23843   | 0.057981 | 0.408503 | 0.382452 | Ran         |
| GO_BP_m2GO:000643prolyl-tRN,1/470  | 3/23843   | 0.057981 | 0.408503 | 0.382452 | Eprs        |
| GO_BP_m2GO:000666glucosylcer1/470  | 3/23843   | 0.057981 | 0.408503 | 0.382452 | Gba2        |
| GO_BP_m2GO:00070Couter mito1/470   | 3/23843   | 0.057981 | 0.408503 | 0.382452 | Tomm20      |
| GO_BP_m2GO:000939folic acid-c1/470 | 3/23843   | 0.057981 | 0.408503 | 0.382452 | Pm20d2      |
| GO_BP_m2GO:001015specificatio1/470 | 3/23843   | 0.057981 | 0.408503 | 0.382452 | Bmp4        |
| GO_BP_m2GO:001079regulation 1/470  | 3/23843   | 0.057981 | 0.408503 | 0.382452 | Rab11a      |
| GO_BP_m2GO:001401neuroblast 1/470  | 3/23843   | 0.057981 | 0.408503 | 0.382452 | Six3        |
| GO_BP_m2GO:001576disaccharic1/470  | 3/23843   | 0.057981 | 0.408503 | 0.382452 | Slc45a4     |
| GO_BP_m2GO:001577sucrose tra1/470  | 3/23843   | 0.057981 | 0.408503 | 0.382452 | Slc45a4     |
| GO_BP_m2GO:001577oligosacchi1/470  | 3/23843   | 0.057981 | 0.408503 | 0.382452 | Slc45a4     |
| GO_BP_m2GO:001582L-serine tra1/470 | 3/23843   | 0.057981 | 0.408503 | 0.382452 | Slc7a10     |
| GO_BP_m2GO:001967ammonia a1/470    | 3/23843   | 0.057981 | 0.408503 | 0.382452 | Glul        |
| GO_BP_m2GO:002155olfactory n1/470  | 3/23843   | 0.057981 | 0.408503 | 0.382452 | Chd7        |
| GO_BP_m2GO:00302Cdermatan e1/470   | 3/23843   | 0.057981 | 0.408503 | 0.382452 | Chst12      |
| GO_BP_m2GO:00315Ctelomeric h1/470  | 3/23843   | 0.057981 | 0.408503 | 0.382452 | H3f3b       |
| GO_BP_m2GO:00320Eciliary basa1/470 | 3/23843   | 0.057981 | 0.408503 | 0.382452 | Crocc       |
| GO_BP_m2GO:00352Ecentral ner1/470  | 3/23843   | 0.057981 | 0.408503 | 0.382452 | Mafb        |
| GO_BP_m2GO:00352Ebrain segm1/470   | 3/23843   | 0.057981 | 0.408503 | 0.382452 | Mafb        |
| GO_BP_m2GO:003584cloaca dev1/470   | 3/23843   | 0.057981 | 0.408503 | 0.382452 | Bmp4        |
| GO_BP_m2GO:003586glial cell-d1/470 | 3/23843   | 0.057981 | 0.408503 | 0.382452 | Sulf2       |

|                  |                     |         |          |          |          |          |
|------------------|---------------------|---------|----------|----------|----------|----------|
| GO_BP_m2GO:00359 | δdeltoid tub 1/470  | 3/23843 | 0.057981 | 0.408503 | 0.382452 | Bmp4     |
| GO_BP_m2GO:00362 | εmultivesicu 1/470  | 3/23843 | 0.057981 | 0.408503 | 0.382452 | Rab11a   |
| GO_BP_m2GO:00363 | εpre-replica 1/470  | 3/23843 | 0.057981 | 0.408503 | 0.382452 | Wdr18    |
| GO_BP_m2GO:00423 | ζkeratan sul 1/470  | 3/23843 | 0.057981 | 0.408503 | 0.382452 | Chst5    |
| GO_BP_m2GO:00423 | ζwater-solu 1/470   | 3/23843 | 0.057981 | 0.408503 | 0.382452 | Pm20d2   |
| GO_BP_m2GO:00425 | ζpteridine-c 1/470  | 3/23843 | 0.057981 | 0.408503 | 0.382452 | Pm20d2   |
| GO_BP_m2GO:00427 | ζD-xylose n 1/470   | 3/23843 | 0.057981 | 0.408503 | 0.382452 | Xylb     |
| GO_BP_m2GO:00429 | ζpositive re 1/470  | 3/23843 | 0.057981 | 0.408503 | 0.382452 | Rack1    |
| GO_BP_m2GO:00439 | εhistone H3 1/470   | 3/23843 | 0.057981 | 0.408503 | 0.382452 | Aurkb    |
| GO_BP_m2GO:00442 | ζ'de novo' A 1/470  | 3/23843 | 0.057981 | 0.408503 | 0.382452 | Adsl     |
| GO_BP_m2GO:00463 | CDP-diacyl 1/470    | 3/23843 | 0.057981 | 0.408503 | 0.382452 | Cdipt    |
| GO_BP_m2GO:00469 | εketone boc 1/470   | 3/23843 | 0.057981 | 0.408503 | 0.382452 | Hmgcl    |
| GO_BP_m2GO:00486 | εregulation 1/470   | 3/23843 | 0.057981 | 0.408503 | 0.382452 | Spg20    |
| GO_BP_m2GO:00601 | 7regulation 1/470   | 3/23843 | 0.057981 | 0.408503 | 0.382452 | Ralb     |
| GO_BP_m2GO:00706 | 4formin-nuc 1/470   | 3/23843 | 0.057981 | 0.408503 | 0.382452 | Spire2   |
| GO_BP_m2GO:00714 | εcellular res 1/470 | 3/23843 | 0.057981 | 0.408503 | 0.382452 | Sipa1    |
| GO_BP_m2GO:00721 | ζmesenchyr 1/470    | 3/23843 | 0.057981 | 0.408503 | 0.382452 | Bmp4     |
| GO_BP_m2GO:00721 | ζureter urot 1/470  | 3/23843 | 0.057981 | 0.408503 | 0.382452 | Bmp4     |
| GO_BP_m2GO:00722 | εmetaneph 1/470     | 3/23843 | 0.057981 | 0.408503 | 0.382452 | Bmp4     |
| GO_BP_m2GO:00900 | ζnegative re 1/470  | 3/23843 | 0.057981 | 0.408503 | 0.382452 | Gpd1l    |
| GO_BP_m2GO:00902 | ζregulation 1/470   | 3/23843 | 0.057981 | 0.408503 | 0.382452 | Trappc12 |
| GO_BP_m2GO:00971 | εmesenchyr 1/470    | 3/23843 | 0.057981 | 0.408503 | 0.382452 | Bmp4     |
| GO_BP_m2GO:00990 | 7mitochond 1/470    | 3/23843 | 0.057981 | 0.408503 | 0.382452 | Pink1    |
| GO_BP_m2GO:00990 | 7mitochond 1/470    | 3/23843 | 0.057981 | 0.408503 | 0.382452 | Pink1    |
| GO_BP_m2GO:01100 | ζformin-nuc 1/470   | 3/23843 | 0.057981 | 0.408503 | 0.382452 | Spire2   |
| GO_BP_m2GO:19001 | εnegative re 1/470  | 3/23843 | 0.057981 | 0.408503 | 0.382452 | Syt11    |
| GO_BP_m2GO:19006 | 2regulation 1/470   | 3/23843 | 0.057981 | 0.408503 | 0.382452 | Nr4a3    |
| GO_BP_m2GO:19006 | 2positive re 1/470  | 3/23843 | 0.057981 | 0.408503 | 0.382452 | Nr4a3    |
| GO_BP_m2GO:19015 | ζpositive re 1/470  | 3/23843 | 0.057981 | 0.408503 | 0.382452 | Zbtb1    |
| GO_BP_m2GO:19018 | 4regulation 1/470   | 3/23843 | 0.057981 | 0.408503 | 0.382452 | Pde4d    |
| GO_BP_m2GO:19019 | εregulation 1/470   | 3/23843 | 0.057981 | 0.408503 | 0.382452 | Bmp4     |
| GO_BP_m2GO:19021 | εregulation 1/470   | 3/23843 | 0.057981 | 0.408503 | 0.382452 | Pcbp4    |
| GO_BP_m2GO:19022 | ζpre-replica 1/470  | 3/23843 | 0.057981 | 0.408503 | 0.382452 | Wdr18    |
| GO_BP_m2GO:19027 | 7mitochond 1/470    | 3/23843 | 0.057981 | 0.408503 | 0.382452 | Fastkd2  |
| GO_BP_m2GO:19029 | εregulation 1/470   | 3/23843 | 0.057981 | 0.408503 | 0.382452 | Pink1    |
| GO_BP_m2GO:19032 | ζregulation 1/470   | 3/23843 | 0.057981 | 0.408503 | 0.382452 | Stxbp1   |
| GO_BP_m2GO:19032 | ζpositive re 1/470  | 3/23843 | 0.057981 | 0.408503 | 0.382452 | Stxbp1   |
| GO_BP_m2GO:19034 | 2negative re 1/470  | 3/23843 | 0.057981 | 0.408503 | 0.382452 | Syt11    |
| GO_BP_m2GO:19035 | εpositive re 1/470  | 3/23843 | 0.057981 | 0.408503 | 0.382452 | Crocc    |
| GO_BP_m2GO:19037 | 7positive re 1/470  | 3/23843 | 0.057981 | 0.408503 | 0.382452 | Tsg101   |
| GO_BP_m2GO:19038 | ζglycine im 1/470   | 3/23843 | 0.057981 | 0.408503 | 0.382452 | Slc25a38 |
| GO_BP_m2GO:19047 | εpositive re 1/470  | 3/23843 | 0.057981 | 0.408503 | 0.382452 | Pink1    |
| GO_BP_m2GO:19048 | εresponse tr 1/470  | 3/23843 | 0.057981 | 0.408503 | 0.382452 | Pink1    |
| GO_BP_m2GO:19048 | εcellular res 1/470 | 3/23843 | 0.057981 | 0.408503 | 0.382452 | Pink1    |
| GO_BP_m2GO:19051 | εnegative re 1/470  | 3/23843 | 0.057981 | 0.408503 | 0.382452 | Syt11    |
| GO_BP_m2GO:19052 | ζregulation 1/470   | 3/23843 | 0.057981 | 0.408503 | 0.382452 | Bmp4     |
| GO_BP_m2GO:19052 | ζpositive re 1/470  | 3/23843 | 0.057981 | 0.408503 | 0.382452 | Bmp4     |
| GO_BP_m2GO:19053 | 1regulation 1/470   | 3/23843 | 0.057981 | 0.408503 | 0.382452 | Bmp4     |

|                               |        |           |          |          |          |             |
|-------------------------------|--------|-----------|----------|----------|----------|-------------|
| GO_BP_m2GO:190531positive re  | 1/470  | 3/23843   | 0.057981 | 0.408503 | 0.382452 | Bmp4        |
| GO_BP_m2GO:190555regulation   | 1/470  | 3/23843   | 0.057981 | 0.408503 | 0.382452 | Fkbp1       |
| GO_BP_m2GO:200004regulation   | 1/470  | 3/23843   | 0.057981 | 0.408503 | 0.382452 | Sfrp2       |
| GO_BP_m2GO:200004negative re  | 1/470  | 3/23843   | 0.057981 | 0.408503 | 0.382452 | Sfrp2       |
| GO_BP_m2GO:200032regulation   | 1/470  | 3/23843   | 0.057981 | 0.408503 | 0.382452 | Zcchc12     |
| GO_BP_m2GO:200032positive re  | 1/470  | 3/23843   | 0.057981 | 0.408503 | 0.382452 | Zcchc12     |
| GO_BP_m2GO:200064negative re  | 1/470  | 3/23843   | 0.057981 | 0.408503 | 0.382452 | Mtmr2       |
| GO_BP_m2GO:200083negative re  | 1/470  | 3/23843   | 0.057981 | 0.408503 | 0.382452 | Cry1        |
| GO_BP_m2GO:200084negative re  | 1/470  | 3/23843   | 0.057981 | 0.408503 | 0.382452 | Cry1        |
| GO_BP_m2GO:200085negative re  | 1/470  | 3/23843   | 0.057981 | 0.408503 | 0.382452 | Cry1        |
| GO_BP_m2GO:200087regulation   | 1/470  | 3/23843   | 0.057981 | 0.408503 | 0.382452 | Gdf9        |
| GO_BP_m2GO:000678heme biosy   | 2/470  | 20/23843  | 0.058317 | 0.408503 | 0.382452 | Alad/Cox10  |
| GO_BP_m2GO:001003response tr  | 2/470  | 20/23843  | 0.058317 | 0.408503 | 0.382452 | Aco1/Cybr1  |
| GO_BP_m2GO:00148C release of  | 2/470  | 20/23843  | 0.058317 | 0.408503 | 0.382452 | Chd7/Pde4   |
| GO_BP_m2GO:003144regulation   | 2/470  | 20/23843  | 0.058317 | 0.408503 | 0.382452 | Ncbp2/Rnf   |
| GO_BP_m2GO:004253tumor necr   | 2/470  | 20/23843  | 0.058317 | 0.408503 | 0.382452 | Cybb/Ube2   |
| GO_BP_m2GO:004253regulation   | 2/470  | 20/23843  | 0.058317 | 0.408503 | 0.382452 | Cybb/Ube2   |
| GO_BP_m2GO:199018exosomal s   | 2/470  | 20/23843  | 0.058317 | 0.408503 | 0.382452 | Rab11a/Tsq  |
| GO_BP_m2GO:200031regulation   | 2/470  | 20/23843  | 0.058317 | 0.408503 | 0.382452 | Pink1/Ptk2  |
| GO_BP_m2GO:000906aerobic res  | 4/470  | 74/23843  | 0.058429 | 0.408503 | 0.382452 | Aco1/Adsl   |
| GO_BP_m2GO:007142ribonucleo   | 4/470  | 74/23843  | 0.058429 | 0.408503 | 0.382452 | Hnrnpa2b1   |
| GO_BP_m2GO:006082regulation   | 8/470  | 211/23843 | 0.058471 | 0.408503 | 0.382452 | Bambi/Dkk   |
| GO_BP_m2GO:00181C peptidyl-s  | 11/470 | 325/23843 | 0.058574 | 0.408503 | 0.382452 | Aurkb/Clk1  |
| GO_BP_m2GO:001071positive re  | 3/470  | 45/23843  | 0.058764 | 0.408503 | 0.382452 | Bambi/Bmq   |
| GO_BP_m2GO:003019collagen fik | 3/470  | 45/23843  | 0.058764 | 0.408503 | 0.382452 | Col2a1/Lm   |
| GO_BP_m2GO:003052androgen r   | 3/470  | 45/23843  | 0.058764 | 0.408503 | 0.382452 | Kdm3a/Rnt   |
| GO_BP_m2GO:003301tetrapyrrol  | 3/470  | 45/23843  | 0.058764 | 0.408503 | 0.382452 | Alad/Cox10  |
| GO_BP_m2GO:006061adipose tis  | 3/470  | 45/23843  | 0.058764 | 0.408503 | 0.382452 | Fgl1/Id2/Sr |
| GO_BP_m2GO:190237negative re  | 3/470  | 45/23843  | 0.058764 | 0.408503 | 0.382452 | Dhx34/Elav  |
| GO_BP_m2GO:001652negative re  | 5/470  | 106/23843 | 0.058803 | 0.408503 | 0.382452 | Angpt4/Fo   |
| GO_BP_m2GO:003476regulation   | 14/470 | 445/23843 | 0.05926  | 0.411001 | 0.384791 | Agrn/Bmp4   |
| GO_BP_m2GO:005165establishm   | 13/470 | 405/23843 | 0.059483 | 0.411864 | 0.3856   | Bloc1s2/Ce  |
| GO_BP_m2GO:000633nucleosom    | 5/470  | 107/23843 | 0.060736 | 0.418795 | 0.392088 | Asf1a/Chaf  |
| GO_BP_m2GO:00901C positive re | 5/470  | 107/23843 | 0.060736 | 0.418795 | 0.392088 | Bmp4/Gdf6   |
| GO_BP_m2GO:009887vesicle-me   | 4/470  | 75/23843  | 0.060804 | 0.418795 | 0.392088 | Csk/Rack1/  |
| GO_BP_m2GO:004311receptor m   | 7/470  | 177/23843 | 0.061828 | 0.418795 | 0.392088 | Agrn/Ap2b   |
| GO_BP_m2GO:000641tRNA amin    | 3/470  | 46/23843  | 0.06198  | 0.418795 | 0.392088 | Eprs/Farsa/ |
| GO_BP_m2GO:002177olfactory b  | 3/470  | 46/23843  | 0.06198  | 0.418795 | 0.392088 | Chd7/Id2/S  |
| GO_BP_m2GO:007252purine-cor   | 3/470  | 46/23843  | 0.06198  | 0.418795 | 0.392088 | Rack1/Pde:  |
| GO_BP_m2GO:009869regulation   | 3/470  | 46/23843  | 0.06198  | 0.418795 | 0.392088 | Sh3gl1/Stx  |
| GO_BP_m2GO:009881modulator    | 3/470  | 46/23843  | 0.06198  | 0.418795 | 0.392088 | Mtmr2/Ptk   |
| GO_BP_m2GO:000728spermatog    | 15/470 | 489/23843 | 0.062095 | 0.418795 | 0.392088 | Ankrd49/C   |
| GO_BP_m2GO:002241cellular prc | 12/470 | 368/23843 | 0.062251 | 0.418795 | 0.392088 | Bmp4/Dnd    |
| GO_BP_m2GO:004688regulation   | 10/470 | 290/23843 | 0.062688 | 0.418795 | 0.392088 | Chd7/Cry1.  |
| GO_BP_m2GO:001046regulation   | 5/470  | 108/23843 | 0.062704 | 0.418795 | 0.392088 | Aplp2/Pink  |
| GO_BP_m2GO:003236regulation   | 5/470  | 108/23843 | 0.062704 | 0.418795 | 0.392088 | Acat2/Acsl  |
| GO_BP_m2GO:000232lymphoid p   | 2/470  | 21/23843  | 0.063638 | 0.418795 | 0.392088 | Bmp4/Zbtb   |
| GO_BP_m2GO:001059positive re  | 2/470  | 21/23843  | 0.063638 | 0.418795 | 0.392088 | Auts2/Rac2  |

|                                |         |           |          |          |          |              |
|--------------------------------|---------|-----------|----------|----------|----------|--------------|
| GO_BP_m2GO:004315entrainment   | 2/470   | 21/23843  | 0.063638 | 0.418795 | 0.392088 | Cry1/Id2     |
| GO_BP_m2GO:007073histone H3    | 2/470   | 21/23843  | 0.063638 | 0.418795 | 0.392088 | Hist1h1e/S   |
| GO_BP_m2GO:009773extracellular | 2/470   | 21/23843  | 0.063638 | 0.418795 | 0.392088 | Rab11a/Tsc   |
| GO_BP_m2GO:190152positive re   | ç2/470  | 21/23843  | 0.063638 | 0.418795 | 0.392088 | Atf4/Chd6    |
| GO_BP_m2GO:190351release of    | ε2/470  | 21/23843  | 0.063638 | 0.418795 | 0.392088 | Chd7/Pde4    |
| GO_BP_m2GO:003032embryonic     | 6/470   | 143/23843 | 0.064267 | 0.418795 | 0.392088 | Aff3/Bmp4    |
| GO_BP_m2GO:003511embryonic     | 6/470   | 143/23843 | 0.064267 | 0.418795 | 0.392088 | Aff3/Bmp4    |
| GO_BP_m2GO:003812ERBB signa    | 5/470   | 109/23843 | 0.064709 | 0.418795 | 0.392088 | Aplp2/Carr   |
| GO_BP_m2GO:200018negative re   | 5/470   | 109/23843 | 0.064709 | 0.418795 | 0.392088 | Angpt4/Fo    |
| GO_BP_m2GO:001931hexose me     | 8/470   | 216/23843 | 0.065163 | 0.418795 | 0.392088 | Atf4/Cry1/I  |
| GO_BP_m2GO:005178positive re   | ç4/470  | 77/23843  | 0.065704 | 0.418795 | 0.392088 | Aurkb/Chr    |
| GO_BP_m2GO:003017negative re   | 6/470   | 144/23843 | 0.066005 | 0.418795 | 0.392088 | Dkk4/Lats2   |
| GO_BP_m2GO:004863regulation    | 12/470  | 372/23843 | 0.066339 | 0.418795 | 0.392088 | Agrn/Bmp4    |
| GO_BP_m2GO:009009regulation    | 8/470   | 217/23843 | 0.066556 | 0.418795 | 0.392088 | Bambi/Bmq    |
| GO_BP_m2GO:009027regulation    | 8/470   | 217/23843 | 0.066556 | 0.418795 | 0.392088 | Chd7/Glul/   |
| GO_BP_m2GO:004864negative re   | 5/470   | 110/23843 | 0.066749 | 0.418795 | 0.392088 | Bmp4/Rnf6    |
| GO_BP_m2GO:009009negative re   | 5/470   | 110/23843 | 0.066749 | 0.418795 | 0.392088 | Dkk4/Lats2   |
| GO_BP_m2GO:000633chromatin     | 6/470   | 145/23843 | 0.06777  | 0.418795 | 0.392088 | Actl6b/Chc   |
| GO_BP_m2GO:005196regulation    | 4/470   | 78/23843  | 0.06823  | 0.418795 | 0.392088 | Glul/Grm7/   |
| GO_BP_m2GO:000227mast cell     | ar3/470 | 48/23843  | 0.068652 | 0.418795 | 0.392088 | Nr4a3/Rac:   |
| GO_BP_m2GO:000636transcriptic  | 3/470   | 48/23843  | 0.068652 | 0.418795 | 0.392088 | Atf4/Cebp:   |
| GO_BP_m2GO:001059negative re   | 3/470   | 48/23843  | 0.068652 | 0.418795 | 0.392088 | Angpt4/Pd    |
| GO_BP_m2GO:002154cranial nen   | 3/470   | 48/23843  | 0.068652 | 0.418795 | 0.392088 | Chd7/Mafk    |
| GO_BP_m2GO:002198olfactory lc  | 3/470   | 48/23843  | 0.068652 | 0.418795 | 0.392088 | Chd7/Id2/S   |
| GO_BP_m2GO:004330mast cell     | d3/470  | 48/23843  | 0.068652 | 0.418795 | 0.392088 | Nr4a3/Rac:   |
| GO_BP_m2GO:000654glutamine     | id2/470 | 22/23843  | 0.069114 | 0.418795 | 0.392088 | Cad/Glul     |
| GO_BP_m2GO:000964photoperic    | 2/470   | 22/23843  | 0.069114 | 0.418795 | 0.392088 | Cry1/Id2     |
| GO_BP_m2GO:003025growth hor    | 2/470   | 22/23843  | 0.069114 | 0.418795 | 0.392088 | Chd7/Serp    |
| GO_BP_m2GO:005144positive re   | ç2/470  | 22/23843  | 0.069114 | 0.418795 | 0.392088 | Eif4g3/Lfnc  |
| GO_BP_m2GO:006096negative re   | 2/470   | 22/23843  | 0.069114 | 0.418795 | 0.392088 | Dnd1/Elavl   |
| GO_BP_m2GO:007121cellular res  | ç2/470  | 22/23843  | 0.069114 | 0.418795 | 0.392088 | Derl1/Sdf2   |
| GO_BP_m2GO:007145protein loc   | 2/470   | 22/23843  | 0.069114 | 0.418795 | 0.392088 | Aurkb/Traq   |
| GO_BP_m2GO:007257hepatocyte    | 2/470   | 22/23843  | 0.069114 | 0.418795 | 0.392088 | Plau/Sulf2   |
| GO_BP_m2GO:007257epithelial    | c2/470  | 22/23843  | 0.069114 | 0.418795 | 0.392088 | Plau/Sulf2   |
| GO_BP_m2GO:190138negative re   | 2/470   | 22/23843  | 0.069114 | 0.418795 | 0.392088 | Agrn/Kcnh.   |
| GO_BP_m2GO:190364regulation    | 2/470   | 22/23843  | 0.069114 | 0.418795 | 0.392088 | Chmp3/Mt     |
| GO_BP_m2GO:200083regulation    | 2/470   | 22/23843  | 0.069114 | 0.418795 | 0.392088 | Cry1/Gdf9    |
| GO_BP_m2GO:003497response tr   | 8/470   | 219/23843 | 0.069397 | 0.418795 | 0.392088 | Atf4/Derl1/  |
| GO_BP_m2GO:003018B cell differ | 6/470   | 146/23843 | 0.069563 | 0.418795 | 0.392088 | Id2/Ifna4/It |
| GO_BP_m2GO:007147cellular res  | ç6/470  | 146/23843 | 0.069563 | 0.418795 | 0.392088 | Aurkb/Ect2   |
| GO_BP_m2GO:009059sensory or    | ç10/470 | 296/23843 | 0.069796 | 0.418795 | 0.392088 | Bmp4/Chd     |
| GO_BP_m2GO:007025actin-medi    | 4/470   | 79/23843  | 0.070804 | 0.418795 | 0.392088 | Frmf6/Gpc    |
| GO_BP_m2GO:190390negative re   | 4/470   | 79/23843  | 0.070804 | 0.418795 | 0.392088 | Chmp3/Ma     |
| GO_BP_m2GO:004333response tr   | 5/470   | 112/23843 | 0.070935 | 0.418795 | 0.392088 | Bmp4/Hnrr    |
| GO_BP_m2GO:000244mast cell     | rr3/470 | 49/23843  | 0.072105 | 0.418795 | 0.392088 | Nr4a3/Rac:   |
| GO_BP_m2GO:003300regulation    | 3/470   | 49/23843  | 0.072105 | 0.418795 | 0.392088 | Nr4a3/Rac:   |
| GO_BP_m2GO:004303tRNA amin     | 3/470   | 49/23843  | 0.072105 | 0.418795 | 0.392088 | Eprs/Farsa/  |
| GO_BP_m2GO:004846cell matura   | 7/470   | 184/23843 | 0.072771 | 0.418795 | 0.392088 | Cebpa/Farf   |

|                                     |           |          |          |          |              |
|-------------------------------------|-----------|----------|----------|----------|--------------|
| GO_BP_m2GO:002167nerve deve4/470    | 80/23843  | 0.073428 | 0.418795 | 0.392088 | Chd7/Mafk    |
| GO_BP_m2GO:003019extracellula8/470  | 222/23843 | 0.073796 | 0.418795 | 0.392088 | Fam234b/F    |
| GO_BP_m2GO:004218cellular ket7/470  | 185/23843 | 0.074423 | 0.418795 | 0.392088 | Acsl4/Coq8   |
| GO_BP_m2GO:001906virion asser2/470  | 23/23843  | 0.074739 | 0.418795 | 0.392088 | Chmp3/Tsc    |
| GO_BP_m2GO:003014sphingolipi2/470   | 23/23843  | 0.074739 | 0.418795 | 0.392088 | Gba2/Sgpl    |
| GO_BP_m2GO:004833mesoderm.2/470     | 23/23843  | 0.074739 | 0.418795 | 0.392088 | Bmp4/Sfrp    |
| GO_BP_m2GO:006115mRNA desi2/470     | 23/23843  | 0.074739 | 0.418795 | 0.392088 | Mettl14/Zc   |
| GO_BP_m2GO:014011export acrc2/470   | 23/23843  | 0.074739 | 0.418795 | 0.392088 | Agrn/Kcnh    |
| GO_BP_m2GO:004866regulation 6/470   | 149/23843 | 0.075103 | 0.418795 | 0.392088 | Bmp4/Id2/    |
| GO_BP_m2GO:005067regulation 11/470  | 340/23843 | 0.075246 | 0.418795 | 0.392088 | Bmp4/Glul,   |
| GO_BP_m2GO:000689Golgi to pl:3/470  | 50/23843  | 0.075634 | 0.418795 | 0.392088 | Csk/Rack1/   |
| GO_BP_m2GO:003112mRNA 3'-e3/470     | 50/23843  | 0.075634 | 0.418795 | 0.392088 | Ncbp2/Pak    |
| GO_BP_m2GO:004214cellular resj3/470 | 50/23843  | 0.075634 | 0.418795 | 0.392088 | Atf4/Irfg2/I |
| GO_BP_m2GO:004303amino acid3/470    | 50/23843  | 0.075634 | 0.418795 | 0.392088 | Eprs/Farsa/  |
| GO_BP_m2GO:004361regulation 3/470   | 50/23843  | 0.075634 | 0.418795 | 0.392088 | Atf4/Chd6/   |
| GO_BP_m2GO:003202positive reç4/470  | 81/23843  | 0.076101 | 0.418795 | 0.392088 | Glul/Oxct1,  |
| GO_BP_m2GO:19004C regulation 4/470  | 81/23843  | 0.076101 | 0.418795 | 0.392088 | Atf4/Rack1   |
| GO_BP_m2GO:007099neuron deç12/470   | 381/23843 | 0.076168 | 0.418795 | 0.392088 | Agrn/Atf4/   |
| GO_BP_m2GO:003007peptide ho9/470    | 262/23843 | 0.076228 | 0.418795 | 0.392088 | Chd7/Cyb5    |
| GO_BP_m2GO:000073DNA stranc1/470    | 4/23843   | 0.076553 | 0.418795 | 0.392088 | Recql        |
| GO_BP_m2GO:000192exocyst ass1/470   | 4/23843   | 0.076553 | 0.418795 | 0.392088 | Ralb         |
| GO_BP_m2GO:000243immune re1/470     | 4/23843   | 0.076553 | 0.418795 | 0.392088 | Myo1g        |
| GO_BP_m2GO:000316bundle of t1/470   | 4/23843   | 0.076553 | 0.418795 | 0.392088 | Id2          |
| GO_BP_m2GO:000338apical cons1/470   | 4/23843   | 0.076553 | 0.418795 | 0.392088 | Frmd6        |
| GO_BP_m2GO:000722signal trans1/470  | 4/23843   | 0.076553 | 0.418795 | 0.392088 | Ift122       |
| GO_BP_m2GO:000738compartme1/470     | 4/23843   | 0.076553 | 0.418795 | 0.392088 | Lfng         |
| GO_BP_m2GO:000741axon targe1/470    | 4/23843   | 0.076553 | 0.418795 | 0.392088 | Stxbp1       |
| GO_BP_m2GO:000941response tr1/470   | 4/23843   | 0.076553 | 0.418795 | 0.392088 | Sipa1        |
| GO_BP_m2GO:000994proximal/d1/470    | 4/23843   | 0.076553 | 0.418795 | 0.392088 | Six3         |
| GO_BP_m2GO:001004response tr1/470   | 4/23843   | 0.076553 | 0.418795 | 0.392088 | Aco1         |
| GO_BP_m2GO:001656protein imç1/470   | 4/23843   | 0.076553 | 0.418795 | 0.392088 | Pex5l        |
| GO_BP_m2GO:001834protein farı1/470  | 4/23843   | 0.076553 | 0.418795 | 0.392088 | Cox10        |
| GO_BP_m2GO:001924citrulline bi1/470 | 4/23843   | 0.076553 | 0.418795 | 0.392088 | Cad          |
| GO_BP_m2GO:002157rhombome1/470      | 4/23843   | 0.076553 | 0.418795 | 0.392088 | Mafb         |
| GO_BP_m2GO:003009protein rep1/470   | 4/23843   | 0.076553 | 0.418795 | 0.392088 | Msrb3        |
| GO_BP_m2GO:00312C posttransla1/470  | 4/23843   | 0.076553 | 0.418795 | 0.392088 | Sec63        |
| GO_BP_m2GO:00315C pericentric 1/470 | 4/23843   | 0.076553 | 0.418795 | 0.392088 | H3f3b        |
| GO_BP_m2GO:00323C negative re1/470  | 4/23843   | 0.076553 | 0.418795 | 0.392088 | Acsl4        |
| GO_BP_m2GO:003232serine trans1/470  | 4/23843   | 0.076553 | 0.418795 | 0.392088 | Slc7a10      |
| GO_BP_m2GO:003276regulation 1/470   | 4/23843   | 0.076553 | 0.418795 | 0.392088 | Nr4a3        |
| GO_BP_m2GO:00345E respiratory 1/470 | 4/23843   | 0.076553 | 0.418795 | 0.392088 | Sdhaf1       |
| GO_BP_m2GO:00345E mitochond 1/470   | 4/23843   | 0.076553 | 0.418795 | 0.392088 | Sdhaf1       |
| GO_BP_m2GO:003502positive reç1/470  | 4/23843   | 0.076553 | 0.418795 | 0.392088 | Auts2        |
| GO_BP_m2GO:003572intraciliary 1/470 | 4/23843   | 0.076553 | 0.418795 | 0.392088 | Ift122       |
| GO_BP_m2GO:003599tendon cell1/470   | 4/23843   | 0.076553 | 0.418795 | 0.392088 | Bmp4         |
| GO_BP_m2GO:003599tendon forı1/470   | 4/23843   | 0.076553 | 0.418795 | 0.392088 | Bmp4         |
| GO_BP_m2GO:00362E multivesicu1/470  | 4/23843   | 0.076553 | 0.418795 | 0.392088 | Rab11a       |
| GO_BP_m2GO:00365C ATF6-medi1/470    | 4/23843   | 0.076553 | 0.418795 | 0.392088 | Mbtps2       |

|                                      |         |          |          |          |           |
|--------------------------------------|---------|----------|----------|----------|-----------|
| GO_BP_m2GO:003809Fc-epsilon 1/470    | 4/23843 | 0.076553 | 0.418795 | 0.392088 | Nr4a3     |
| GO_BP_m2GO:003809Fc-gamma 1/470      | 4/23843 | 0.076553 | 0.418795 | 0.392088 | Myo1g     |
| GO_BP_m2GO:004266negative re1/470    | 4/23843 | 0.076553 | 0.418795 | 0.392088 | Sfrp2     |
| GO_BP_m2GO:004343response tr1/470    | 4/23843 | 0.076553 | 0.418795 | 0.392088 | Nr4a3     |
| GO_BP_m2GO:004431protein K21/470     | 4/23843 | 0.076553 | 0.418795 | 0.392088 | Rnf6      |
| GO_BP_m2GO:004557negative re1/470    | 4/23843 | 0.076553 | 0.418795 | 0.392088 | Id2       |
| GO_BP_m2GO:004629formaldehy1/470     | 4/23843 | 0.076553 | 0.418795 | 0.392088 | Kdm3a     |
| GO_BP_m2GO:004695ketone boc1/470     | 4/23843 | 0.076553 | 0.418795 | 0.392088 | Oxct1     |
| GO_BP_m2GO:004801Tie signalin1/470   | 4/23843 | 0.076553 | 0.418795 | 0.392088 | Angpt4    |
| GO_BP_m2GO:00600C vestibular r1/470  | 4/23843 | 0.076553 | 0.418795 | 0.392088 | Nr4a3     |
| GO_BP_m2GO:006027positive re1/470    | 4/23843 | 0.076553 | 0.418795 | 0.392088 | Plau      |
| GO_BP_m2GO:006068negative re1/470    | 4/23843 | 0.076553 | 0.418795 | 0.392088 | Bmp4      |
| GO_BP_m2GO:006083ciliary rece1/470   | 4/23843 | 0.076553 | 0.418795 | 0.392088 | Ift122    |
| GO_BP_m2GO:006103epithelial c1/470   | 4/23843 | 0.076553 | 0.418795 | 0.392088 | Id2       |
| GO_BP_m2GO:006103endoderm1/470       | 4/23843 | 0.076553 | 0.418795 | 0.392088 | Id2       |
| GO_BP_m2GO:006105dermatom1/470       | 4/23843 | 0.076553 | 0.418795 | 0.392088 | Sfrp2     |
| GO_BP_m2GO:006118regulation 1/470    | 4/23843 | 0.076553 | 0.418795 | 0.392088 | Sfrp2     |
| GO_BP_m2GO:00612C cell prolifer1/470 | 4/23843 | 0.076553 | 0.418795 | 0.392088 | Bmp4      |
| GO_BP_m2GO:007008ubiquitin-c1/470    | 4/23843 | 0.076553 | 0.418795 | 0.392088 | Tsg101    |
| GO_BP_m2GO:007012mitochond1/470      | 4/23843 | 0.076553 | 0.418795 | 0.392088 | 2810006K2 |
| GO_BP_m2GO:007031negative re1/470    | 4/23843 | 0.076553 | 0.418795 | 0.392088 | Foxo4     |
| GO_BP_m2GO:007103CUT catabo1/470     | 4/23843 | 0.076553 | 0.418795 | 0.392088 | Exosc2    |
| GO_BP_m2GO:007104CUT metab1/470      | 4/23843 | 0.076553 | 0.418795 | 0.392088 | Exosc2    |
| GO_BP_m2GO:007137cellular res1/470   | 4/23843 | 0.076553 | 0.418795 | 0.392088 | Nr4a3     |
| GO_BP_m2GO:007209regulation 1/470    | 4/23843 | 0.076553 | 0.418795 | 0.392088 | Bmp4      |
| GO_BP_m2GO:007212negative re1/470    | 4/23843 | 0.076553 | 0.418795 | 0.392088 | Bmp4      |
| GO_BP_m2GO:007219ureter mor1/470     | 4/23843 | 0.076553 | 0.418795 | 0.392088 | Bmp4      |
| GO_BP_m2GO:007219mesenchyr1/470      | 4/23843 | 0.076553 | 0.418795 | 0.392088 | Bmp4      |
| GO_BP_m2GO:007219regulation 1/470    | 4/23843 | 0.076553 | 0.418795 | 0.392088 | Bmp4      |
| GO_BP_m2GO:009013actin filame1/470   | 4/23843 | 0.076553 | 0.418795 | 0.392088 | Mir129-2  |
| GO_BP_m2GO:009016Golgi reass1/470    | 4/23843 | 0.076553 | 0.418795 | 0.392088 | Pdcd10    |
| GO_BP_m2GO:009019negative re1/470    | 4/23843 | 0.076553 | 0.418795 | 0.392088 | Bmp4      |
| GO_BP_m2GO:009019negative re1/470    | 4/23843 | 0.076553 | 0.418795 | 0.392088 | Bmp4      |
| GO_BP_m2GO:009024Wnt signali1/470    | 4/23843 | 0.076553 | 0.418795 | 0.392088 | Sfrp2     |
| GO_BP_m2GO:190356regulation 1/470    | 4/23843 | 0.076553 | 0.418795 | 0.392088 | Crocc     |
| GO_BP_m2GO:190358negative re1/470    | 4/23843 | 0.076553 | 0.418795 | 0.392088 | Pdcd10    |
| GO_BP_m2GO:190375regulation 1/470    | 4/23843 | 0.076553 | 0.418795 | 0.392088 | Pink1     |
| GO_BP_m2GO:190375negative re1/470    | 4/23843 | 0.076553 | 0.418795 | 0.392088 | Pink1     |
| GO_BP_m2GO:190534regulation 1/470    | 4/23843 | 0.076553 | 0.418795 | 0.392088 | Trappc12  |
| GO_BP_m2GO:190534positive re1/470    | 4/23843 | 0.076553 | 0.418795 | 0.392088 | Trappc12  |
| GO_BP_m2GO:190544positive re1/470    | 4/23843 | 0.076553 | 0.418795 | 0.392088 | Pink1     |
| GO_BP_m2GO:190577negative re1/470    | 4/23843 | 0.076553 | 0.418795 | 0.392088 | Sfrp2     |
| GO_BP_m2GO:19059C negative re1/470   | 4/23843 | 0.076553 | 0.418795 | 0.392088 | Sfrp2     |
| GO_BP_m2GO:199008lens fiber c1/470   | 4/23843 | 0.076553 | 0.418795 | 0.392088 | Six3      |
| GO_BP_m2GO:199083response tr1/470    | 4/23843 | 0.076553 | 0.418795 | 0.392088 | Shc1      |
| GO_BP_m2GO:200009regulation 1/470    | 4/23843 | 0.076553 | 0.418795 | 0.392088 | Plau      |
| GO_BP_m2GO:200062regulation 1/470    | 4/23843 | 0.076553 | 0.418795 | 0.392088 | Dhx34     |
| GO_BP_m2GO:200062negative re1/470    | 4/23843 | 0.076553 | 0.418795 | 0.392088 | Dhx34     |

|                                |        |           |          |          |          |             |
|--------------------------------|--------|-----------|----------|----------|----------|-------------|
| GO_BP_m2GO:200116positive re   | 1/470  | 4/23843   | 0.076553 | 0.418795 | 0.392088 | Rnf20       |
| GO_BP_m2GO:190121negative re   | 8/470  | 224/23843 | 0.07682  | 0.419712 | 0.392947 | Atf4/Faim2  |
| GO_BP_m2GO:000609generation    | 11/470 | 342/23843 | 0.077674 | 0.423275 | 0.396283 | Aco1/Adsl/  |
| GO_BP_m2GO:005196negative re   | 11/470 | 342/23843 | 0.077674 | 0.423275 | 0.396283 | Bmp4/Cit/1  |
| GO_BP_m2GO:005118cofactor m    | 14/470 | 465/23843 | 0.078442 | 0.426903 | 0.39968  | Acaca/Coq   |
| GO_BP_m2GO:000640mRNA exp      | 3/470  | 51/23843  | 0.079239 | 0.42813  | 0.400828 | Hnrnpa2b1   |
| GO_BP_m2GO:003090midbrain d    | 3/470  | 51/23843  | 0.079239 | 0.42813  | 0.400828 | Aplp2/Lmx   |
| GO_BP_m2GO:004364inositol ph   | 3/470  | 51/23843  | 0.079239 | 0.42813  | 0.400828 | Mttr2/Mtr   |
| GO_BP_m2GO:006500intracellula  | 3/470  | 51/23843  | 0.079239 | 0.42813  | 0.400828 | Pex5l/Sec6  |
| GO_BP_m2GO:007142mRNA-cor      | 3/470  | 51/23843  | 0.079239 | 0.42813  | 0.400828 | Hnrnpa2b1   |
| GO_BP_m2GO:002306signal rele   | 14/470 | 466/23843 | 0.079495 | 0.42813  | 0.400828 | Chd7/Cplx   |
| GO_BP_m2GO:004643organophc     | 7/470  | 188/23843 | 0.079507 | 0.42813  | 0.400828 | Rack1/Gpd   |
| GO_BP_m2GO:001802peptidyl-ly   | 5/470  | 116/23843 | 0.07973  | 0.42813  | 0.400828 | Auts2/Hist  |
| GO_BP_m2GO:000293response tr   | 2/470  | 24/23843  | 0.080504 | 0.42813  | 0.400828 | Faim2/Pan   |
| GO_BP_m2GO:000964entrainmer    | 2/470  | 24/23843  | 0.080504 | 0.42813  | 0.400828 | Cry1/Id2    |
| GO_BP_m2GO:001057positive re   | 2/470  | 24/23843  | 0.080504 | 0.42813  | 0.400828 | Atf4/Sulf2  |
| GO_BP_m2GO:001404regulation    | 2/470  | 24/23843  | 0.080504 | 0.42813  | 0.400828 | Grm7/Stxb   |
| GO_BP_m2GO:004685phosphatic    | 2/470  | 24/23843  | 0.080504 | 0.42813  | 0.400828 | Mttr2/Mtr   |
| GO_BP_m2GO:005178response tr   | 2/470  | 24/23843  | 0.080504 | 0.42813  | 0.400828 | Derl1/Sdf2  |
| GO_BP_m2GO:006000reflex        | 2/470  | 24/23843  | 0.080504 | 0.42813  | 0.400828 | Auts2/Nr4   |
| GO_BP_m2GO:007257liver morpt   | 2/470  | 24/23843  | 0.080504 | 0.42813  | 0.400828 | Plau/Sulf2  |
| GO_BP_m2GO:190446regulation    | 2/470  | 24/23843  | 0.080504 | 0.42813  | 0.400828 | Mavs/Syt1   |
| GO_BP_m2GO:199077tumor necr    | 2/470  | 24/23843  | 0.080504 | 0.42813  | 0.400828 | Mavs/Syt1   |
| GO_BP_m2GO:003462cellular res  | 4/470  | 83/23843  | 0.08159  | 0.432184 | 0.404624 | Atf4/Derl1/ |
| GO_BP_m2GO:009723cellular res  | 6/470  | 153/23843 | 0.08287  | 0.432184 | 0.404624 | Ect2/Rack1  |
| GO_BP_m2GO:002158cerebellum    | 3/470  | 52/23843  | 0.082916 | 0.432184 | 0.404624 | Coq8b/Fair  |
| GO_BP_m2GO:005073negative re   | 3/470  | 52/23843  | 0.082916 | 0.432184 | 0.404624 | Sfrp2/Suz1  |
| GO_BP_m2GO:007093protein K4    | 3/470  | 52/23843  | 0.082916 | 0.432184 | 0.404624 | Rnf146/Rnl  |
| GO_BP_m2GO:007180protein tra   | 3/470  | 52/23843  | 0.082916 | 0.432184 | 0.404624 | Pex5l/Sec6  |
| GO_BP_m2GO:190236negative re   | 3/470  | 52/23843  | 0.082916 | 0.432184 | 0.404624 | Dhx34/Elav  |
| GO_BP_m2GO:004306extracellula  | 9/470  | 267/23843 | 0.083411 | 0.432184 | 0.404624 | Fam234b//   |
| GO_BP_m2GO:004825regulation    | 4/470  | 84/23843  | 0.084407 | 0.432184 | 0.404624 | Arap3/Mtr   |
| GO_BP_m2GO:004865smooth mt     | 6/470  | 154/23843 | 0.084878 | 0.432184 | 0.404624 | Bmp4/Id2/   |
| GO_BP_m2GO:004687hormone s     | 11/470 | 348/23843 | 0.085253 | 0.432184 | 0.404624 | Chd7/Cry1   |
| GO_BP_m2GO:000677porphyrin-    | 2/470  | 25/23843  | 0.086401 | 0.432184 | 0.404624 | Alad/Cox1   |
| GO_BP_m2GO:003289negative re   | 2/470  | 25/23843  | 0.086401 | 0.432184 | 0.404624 | Acsl4/Grm   |
| GO_BP_m2GO:003592steroid hor   | 2/470  | 25/23843  | 0.086401 | 0.432184 | 0.404624 | Cry1/Gdf9   |
| GO_BP_m2GO:004573respiratory   | 2/470  | 25/23843  | 0.086401 | 0.432184 | 0.404624 | Cybb/Rac2   |
| GO_BP_m2GO:005077RNA destal    | 2/470  | 25/23843  | 0.086401 | 0.432184 | 0.404624 | Mettl14/Zc  |
| GO_BP_m2GO:007180podosome      | 2/470  | 25/23843  | 0.086401 | 0.432184 | 0.404624 | Csf2/Farp2  |
| GO_BP_m2GO:007201glomerulus    | 2/470  | 25/23843  | 0.086401 | 0.432184 | 0.404624 | Bmp4/Not    |
| GO_BP_m2GO:008600ventricular   | 2/470  | 25/23843  | 0.086401 | 0.432184 | 0.404624 | Gpd1l/Kcni  |
| GO_BP_m2GO:005126protein hor   | 11/470 | 349/23843 | 0.086559 | 0.432184 | 0.404624 | Acaca/Alac  |
| GO_BP_m2GO:000636rRNA proc     | 7/470  | 192/23843 | 0.086594 | 0.432184 | 0.404624 | Chd7/Exos   |
| GO_BP_m2GO:000762circadian r   | 7/470  | 192/23843 | 0.086594 | 0.432184 | 0.404624 | Atf4/Cry1   |
| GO_BP_m2GO:003166cellular res  | 7/470  | 192/23843 | 0.086594 | 0.432184 | 0.404624 | Atf4/Fads1  |
| GO_BP_m2GO:000687cellular iror | 3/470  | 53/23843  | 0.086666 | 0.432184 | 0.404624 | Aco1/Erfe/  |
| GO_BP_m2GO:004854digestive tr  | 3/470  | 53/23843  | 0.086666 | 0.432184 | 0.404624 | Bmp4/Id2/   |



|                                      |           |          |          |          |             |
|--------------------------------------|-----------|----------|----------|----------|-------------|
| GO_BP_m2GO:007127cellular res 3/470  | 53/23843  | 0.086666 | 0.432184 | 0.404624 | Ect2/Fosb/  |
| GO_BP_m2GO:00464εphosphatic5/470     | 119/23843 | 0.086691 | 0.432184 | 0.404624 | Cdipt/Fam:  |
| GO_BP_m2GO:003104gene silenc6/470    | 155/23843 | 0.086914 | 0.432184 | 0.404624 | Bmp4/Dnd    |
| GO_BP_m2GO:000721neuropepti4/470     | 85/23843  | 0.08727  | 0.432184 | 0.404624 | Agrp/Gpr1.  |
| GO_BP_m2GO:001071regulation 4/470    | 85/23843  | 0.08727  | 0.432184 | 0.404624 | Bambi/Bm    |
| GO_BP_m2GO:00603εSMAD prot4/470      | 85/23843  | 0.08727  | 0.432184 | 0.404624 | Bmp4/Gdff   |
| GO_BP_m2GO:00072εspermatid  6/470    | 156/23843 | 0.088976 | 0.432184 | 0.404624 | H3f3b/Kdnr  |
| GO_BP_m2GO:00468εpositive reç6/470   | 156/23843 | 0.088976 | 0.432184 | 0.404624 | Glul/Oxct1. |
| GO_BP_m2GO:00100εresponse tr8/470    | 232/23843 | 0.089652 | 0.432184 | 0.404624 | Aco1/Alad/  |
| GO_BP_m2GO:00003C response tr7/470   | 194/23843 | 0.090267 | 0.432184 | 0.404624 | Ect2/Rack1  |
| GO_BP_m2GO:00510εpositive reç7/470   | 194/23843 | 0.090267 | 0.432184 | 0.404624 | Agrn/Bamk   |
| GO_BP_m2GO:00440εregulation 3/470    | 54/23843  | 0.090486 | 0.432184 | 0.404624 | Cry1/Gdf9/  |
| GO_BP_m2GO:004507negative re3/470    | 54/23843  | 0.090486 | 0.432184 | 0.404624 | Mavs/Oas1   |
| GO_BP_m2GO:19039C positive reç3/470  | 54/23843  | 0.090486 | 0.432184 | 0.404624 | Chmp3/Pp    |
| GO_BP_m2GO:00434C steroid hor6/470   | 157/23843 | 0.091065 | 0.432184 | 0.404624 | Bmp4/Cry1   |
| GO_BP_m2GO:007124cellular res 5/470  | 121/23843 | 0.091503 | 0.432184 | 0.404624 | Cebpa/Ect2  |
| GO_BP_m2GO:19016C alpha-amir7/470    | 195/23843 | 0.092137 | 0.432184 | 0.404624 | Cad/Kyat3/  |
| GO_BP_m2GO:00020εchondrocyt 2/470    | 26/23843  | 0.092424 | 0.432184 | 0.404624 | Sfrp2/Sulf2 |
| GO_BP_m2GO:00020εlens morph2/470     | 26/23843  | 0.092424 | 0.432184 | 0.404624 | Bmp4/Six3   |
| GO_BP_m2GO:00092εmRNA tran2/470      | 26/23843  | 0.092424 | 0.432184 | 0.404624 | Atf4/Zbtb1  |
| GO_BP_m2GO:003097retrograde 2/470    | 26/23843  | 0.092424 | 0.432184 | 0.404624 | Derl1/Ube2  |
| GO_BP_m2GO:003301tetrapyrrolε2/470   | 26/23843  | 0.092424 | 0.432184 | 0.404624 | Alad/Cox1C  |
| GO_BP_m2GO:00345C centromerε2/470    | 26/23843  | 0.092424 | 0.432184 | 0.404624 | H3f3b/Traq  |
| GO_BP_m2GO:00464εmembrane 2/470      | 26/23843  | 0.092424 | 0.432184 | 0.404624 | Gba2/Sgpl:  |
| GO_BP_m2GO:00603εinnervation2/470    | 26/23843  | 0.092424 | 0.432184 | 0.404624 | Chd7/Sulf2  |
| GO_BP_m2GO:00614εrenal syste 2/470   | 26/23843  | 0.092424 | 0.432184 | 0.404624 | Bmp4/Notc   |
| GO_BP_m2GO:006144kidney vasc2/470    | 26/23843  | 0.092424 | 0.432184 | 0.404624 | Bmp4/Notc   |
| GO_BP_m2GO:007007histone lysi2/470   | 26/23843  | 0.092424 | 0.432184 | 0.404624 | Hr/Kdm3a    |
| GO_BP_m2GO:00702εsarcoplasm2/470     | 26/23843  | 0.092424 | 0.432184 | 0.404624 | Chd7/Pde4   |
| GO_BP_m2GO:190351endoplasm2/470      | 26/23843  | 0.092424 | 0.432184 | 0.404624 | Derl1/Ube2  |
| GO_BP_m2GO:200017negative re2/470    | 26/23843  | 0.092424 | 0.432184 | 0.404624 | Id2/Vax1    |
| GO_BP_m2GO:000681potassium 8/470     | 234/23843 | 0.093042 | 0.432184 | 0.404624 | Agrn/Atf4/  |
| GO_BP_m2GO:003112RNA 3'-enç4/470     | 87/23843  | 0.093136 | 0.432184 | 0.404624 | Exosc2/Nct  |
| GO_BP_m2GO:003307T cell differ4/470  | 87/23843  | 0.093136 | 0.432184 | 0.404624 | Bmp4/Jmjc   |
| GO_BP_m2GO:190161organic hyc 3/470   | 437/23843 | 0.093873 | 0.432184 | 0.404624 | Aplp2/Ceb   |
| GO_BP_m2GO:009902plasma me7/470      | 196/23843 | 0.094028 | 0.432184 | 0.404624 | Alkbh4/Au   |
| GO_BP_m2GO:00069C phagocyto:10/470   | 314/23843 | 0.094084 | 0.432184 | 0.404624 | Csk/Rack1/  |
| GO_BP_m2GO:00158C L-amino ac3/470    | 55/23843  | 0.094375 | 0.432184 | 0.404624 | Slc25a38/S  |
| GO_BP_m2GO:004362regulation 3/470    | 55/23843  | 0.094375 | 0.432184 | 0.404624 | Atf4/Chd6/  |
| GO_BP_m2GO:00860C cardiac mu3/470    | 55/23843  | 0.094375 | 0.432184 | 0.404624 | Gpd1l/Kcnl  |
| GO_BP_m2GO:00015εfatty acid a1/470   | 5/23843   | 0.094759 | 0.432184 | 0.404624 | Slc27a2     |
| GO_BP_m2GO:00016εconditione 1/470    | 5/23843   | 0.094759 | 0.432184 | 0.404624 | Grm7        |
| GO_BP_m2GO:00031εHis-Purkinj1/470    | 5/23843   | 0.094759 | 0.432184 | 0.404624 | Id2         |
| GO_BP_m2GO:00060C fructose 2,ç 1/470 | 5/23843   | 0.094759 | 0.432184 | 0.404624 | Pfkfb4      |
| GO_BP_m2GO:00061εAMP biosy 1/470     | 5/23843   | 0.094759 | 0.432184 | 0.404624 | Adsl        |
| GO_BP_m2GO:00064εphenylalan1/470     | 5/23843   | 0.094759 | 0.432184 | 0.404624 | Farsa       |
| GO_BP_m2GO:00072εspermatid  1/470    | 5/23843   | 0.094759 | 0.432184 | 0.404624 | Kdm3a       |
| GO_BP_m2GO:00085εregulation 1/470    | 5/23843   | 0.094759 | 0.432184 | 0.404624 | Agrn        |

|                   |                    |         |          |          |          |        |
|-------------------|--------------------|---------|----------|----------|----------|--------|
| GO_BP_m2GO:00109  | negative re1/470   | 5/23843 | 0.094759 | 0.432184 | 0.404624 | Csk    |
| GO_BP_m2GO:001487 | response tr1/470   | 5/23843 | 0.094759 | 0.432184 | 0.404624 | Srl    |
| GO_BP_m2GO:00161  | synaptic ve1/470   | 5/23843 | 0.094759 | 0.432184 | 0.404624 | Sh3gl1 |
| GO_BP_m2GO:00217  | forebrain a1/470   | 5/23843 | 0.094759 | 0.432184 | 0.404624 | Six3   |
| GO_BP_m2GO:002191 | negative re1/470   | 5/23843 | 0.094759 | 0.432184 | 0.404624 | Ift122 |
| GO_BP_m2GO:003004 | parallel act1/470  | 5/23843 | 0.094759 | 0.432184 | 0.404624 | Spire2 |
| GO_BP_m2GO:00302  | dermatan s1/470    | 5/23843 | 0.094759 | 0.432184 | 0.404624 | Chst12 |
| GO_BP_m2GO:003274 | positive re1/470   | 5/23843 | 0.094759 | 0.432184 | 0.404624 | Csf2   |
| GO_BP_m2GO:00330  | negative re1/470   | 5/23843 | 0.094759 | 0.432184 | 0.404624 | Bmp4   |
| GO_BP_m2GO:003502 | negative re1/470   | 5/23843 | 0.094759 | 0.432184 | 0.404624 | Arap3  |
| GO_BP_m2GO:003554 | interferon-1/470   | 5/23843 | 0.094759 | 0.432184 | 0.404624 | Mavs   |
| GO_BP_m2GO:003554 | regulation1/470    | 5/23843 | 0.094759 | 0.432184 | 0.404624 | Mavs   |
| GO_BP_m2GO:003554 | positive re1/470   | 5/23843 | 0.094759 | 0.432184 | 0.404624 | Mavs   |
| GO_BP_m2GO:003592 | RNA impor1/470     | 5/23843 | 0.094759 | 0.432184 | 0.404624 | Tomm20 |
| GO_BP_m2GO:00427  | progesterone1/470  | 5/23843 | 0.094759 | 0.432184 | 0.404624 | Gdf9   |
| GO_BP_m2GO:00429  | negative re1/470   | 5/23843 | 0.094759 | 0.432184 | 0.404624 | Csk    |
| GO_BP_m2GO:00436  | recognitior1/470   | 5/23843 | 0.094759 | 0.432184 | 0.404624 | Jmjd6  |
| GO_BP_m2GO:004591 | negative re1/470   | 5/23843 | 0.094759 | 0.432184 | 0.404624 | Csf2   |
| GO_BP_m2GO:004601 | regulation1/470    | 5/23843 | 0.094759 | 0.432184 | 0.404624 | Rrp8   |
| GO_BP_m2GO:00486  | collateral s1/470  | 5/23843 | 0.094759 | 0.432184 | 0.404624 | Spg20  |
| GO_BP_m2GO:00506  | dermatan s1/470    | 5/23843 | 0.094759 | 0.432184 | 0.404624 | Chst12 |
| GO_BP_m2GO:00510  | tRNA trans1/470    | 5/23843 | 0.094759 | 0.432184 | 0.404624 | Tomm20 |
| GO_BP_m2GO:00512  | establishm1/470    | 5/23843 | 0.094759 | 0.432184 | 0.404624 | Spire2 |
| GO_BP_m2GO:005134 | regulation1/470    | 5/23843 | 0.094759 | 0.432184 | 0.404624 | Rack1  |
| GO_BP_m2GO:006027 | regulation1/470    | 5/23843 | 0.094759 | 0.432184 | 0.404624 | Plau   |
| GO_BP_m2GO:006062 | regulation1/470    | 5/23843 | 0.094759 | 0.432184 | 0.404624 | H3f3b  |
| GO_BP_m2GO:00606  | branch elo1/470    | 5/23843 | 0.094759 | 0.432184 | 0.404624 | Bmp4   |
| GO_BP_m2GO:006097 | embryonic1/470     | 5/23843 | 0.094759 | 0.432184 | 0.404624 | Ift122 |
| GO_BP_m2GO:006104 | positive re1/470   | 5/23843 | 0.094759 | 0.432184 | 0.404624 | Bmp4   |
| GO_BP_m2GO:00610  | sclerotome1/470    | 5/23843 | 0.094759 | 0.432184 | 0.404624 | Sfrp2  |
| GO_BP_m2GO:006132 | cell prolifer1/470 | 5/23843 | 0.094759 | 0.432184 | 0.404624 | Bmp4   |
| GO_BP_m2GO:00615  | glutamate1/470     | 5/23843 | 0.094759 | 0.432184 | 0.404624 | Stxbp1 |
| GO_BP_m2GO:00704  | monocyte1/470      | 5/23843 | 0.094759 | 0.432184 | 0.404624 | Nr4a3  |
| GO_BP_m2GO:00710  | nuclear ret1/470   | 5/23843 | 0.094759 | 0.432184 | 0.404624 | Exosc2 |
| GO_BP_m2GO:00710  | nuclear pol1/470   | 5/23843 | 0.094759 | 0.432184 | 0.404624 | Exosc2 |
| GO_BP_m2GO:00710  | polyadenyl1/470    | 5/23843 | 0.094759 | 0.432184 | 0.404624 | Exosc2 |
| GO_BP_m2GO:00715  | lymphocyte1/470    | 5/23843 | 0.094759 | 0.432184 | 0.404624 | Rac2   |
| GO_BP_m2GO:00716  | positive re1/470   | 5/23843 | 0.094759 | 0.432184 | 0.404624 | Mavs   |
| GO_BP_m2GO:007217 | nephric du1/470    | 5/23843 | 0.094759 | 0.432184 | 0.404624 | Bmp4   |
| GO_BP_m2GO:00721  | ureter smo1/470    | 5/23843 | 0.094759 | 0.432184 | 0.404624 | Bmp4   |
| GO_BP_m2GO:00721  | ureter smo1/470    | 5/23843 | 0.094759 | 0.432184 | 0.404624 | Bmp4   |
| GO_BP_m2GO:00726  | maintenan1/470     | 5/23843 | 0.094759 | 0.432184 | 0.404624 | Pink1  |
| GO_BP_m2GO:00988  | neurotrans1/470    | 5/23843 | 0.094759 | 0.432184 | 0.404624 | Rab11a |
| GO_BP_m2GO:009901 | neuronal d1/470    | 5/23843 | 0.094759 | 0.432184 | 0.404624 | Stxbp1 |
| GO_BP_m2GO:009952 | presynaptic1/470   | 5/23843 | 0.094759 | 0.432184 | 0.404624 | Stxbp1 |
| GO_BP_m2GO:190107 | negative re1/470   | 5/23843 | 0.094759 | 0.432184 | 0.404624 | Pde4d  |
| GO_BP_m2GO:19023  | regulation1/470    | 5/23843 | 0.094759 | 0.432184 | 0.404624 | Kcnh2  |
| GO_BP_m2GO:190327 | regulation1/470    | 5/23843 | 0.094759 | 0.432184 | 0.404624 | Agrn   |

|                                     |           |          |          |          |             |
|-------------------------------------|-----------|----------|----------|----------|-------------|
| GO_BP_m2GO:190329regulation 1/470   | 5/23843   | 0.094759 | 0.432184 | 0.404624 | Pink1       |
| GO_BP_m2GO:190329negative re1/470   | 5/23843   | 0.094759 | 0.432184 | 0.404624 | Pink1       |
| GO_BP_m2GO:190336positive re1/470   | 5/23843   | 0.094759 | 0.432184 | 0.404624 | Penk        |
| GO_BP_m2GO:190337negative re1/470   | 5/23843   | 0.094759 | 0.432184 | 0.404624 | Pink1       |
| GO_BP_m2GO:190377regulation 1/470   | 5/23843   | 0.094759 | 0.432184 | 0.404624 | Tsg101      |
| GO_BP_m2GO:190439positive re1/470   | 5/23843   | 0.094759 | 0.432184 | 0.404624 | Agrn        |
| GO_BP_m2GO:190495regulation 1/470   | 5/23843   | 0.094759 | 0.432184 | 0.404624 | Sfrp2       |
| GO_BP_m2GO:190544regulation 1/470   | 5/23843   | 0.094759 | 0.432184 | 0.404624 | Pink1       |
| GO_BP_m2GO:200098positive re1/470   | 5/23843   | 0.094759 | 0.432184 | 0.404624 | Penk        |
| GO_BP_m2GO:200116regulation 1/470   | 5/23843   | 0.094759 | 0.432184 | 0.404624 | Rnf20       |
| GO_BP_m2GO:000864carbohydrate6/470  | 159/23843 | 0.095322 | 0.433806 | 0.406143 | Aspscr1/M   |
| GO_BP_m2GO:006004retina deve6/470   | 159/23843 | 0.095322 | 0.433806 | 0.406143 | Chd7/Irx5/  |
| GO_BP_m2GO:005140neuron apc9/470    | 275/23843 | 0.095721 | 0.435151 | 0.407401 | Agrn/Atf4/  |
| GO_BP_m2GO:004505regulated e7/470   | 197/23843 | 0.09594  | 0.435676 | 0.407893 | Cplx4/Nr4a  |
| GO_BP_m2GO:000639mRNA pro13/470     | 439/23843 | 0.09636  | 0.437112 | 0.409237 | Cdc5l/Dyrk  |
| GO_BP_m2GO:002153telencepha8/470    | 236/23843 | 0.096505 | 0.437297 | 0.40941  | Bmp4/Cep    |
| GO_BP_m2GO:190134regulation 10/470  | 316/23843 | 0.097058 | 0.439328 | 0.411312 | Angpt4/Br   |
| GO_BP_m2GO:004327negative re6/470   | 160/23843 | 0.097489 | 0.440803 | 0.412693 | Acsl4/Agrn  |
| GO_BP_m2GO:000006protein im3/470    | 56/23843  | 0.098332 | 0.441852 | 0.413675 | Mavs/Ran/   |
| GO_BP_m2GO:002157hindbrain r3/470   | 56/23843  | 0.098332 | 0.441852 | 0.413675 | Coq8b/Fair  |
| GO_BP_m2GO:000651protein qu2/470    | 27/23843  | 0.098564 | 0.441852 | 0.413675 | Derl1/Sdf2  |
| GO_BP_m2GO:003048tRNA meth2/470     | 27/23843  | 0.098564 | 0.441852 | 0.413675 | Ftsj1/Nsun1 |
| GO_BP_m2GO:003236negative re2/470   | 27/23843  | 0.098564 | 0.441852 | 0.413675 | Acsl4/Cry1  |
| GO_BP_m2GO:003466ncRNA cat2/470     | 27/23843  | 0.098564 | 0.441852 | 0.413675 | Exosc2/Xrn  |
| GO_BP_m2GO:005115regulation 2/470   | 27/23843  | 0.098564 | 0.441852 | 0.413675 | Bmp4/Foxc   |
| GO_BP_m2GO:009031positive re2/470   | 27/23843  | 0.098564 | 0.441852 | 0.413675 | Dyrk1a/Pin  |
| GO_BP_m2GO:003021erythrocyte5/470   | 124/23843 | 0.098973 | 0.442742 | 0.414509 | Bmp4/Id2/   |
| GO_BP_m2GO:003519gene silenc5/470   | 124/23843 | 0.098973 | 0.442742 | 0.414509 | Bmp4/Dnd    |
| GO_BP_m2GO:005507iron ion ho4/470   | 89/23843  | 0.099184 | 0.443212 | 0.414948 | Aco1/Erfe/  |
| GO_BP_m2GO:003166response tr11/470  | 359/23843 | 0.100292 | 0.447686 | 0.419138 | Adsl/Alad/  |
| GO_BP_m2GO:003149chromatin 5/470    | 125/23843 | 0.10153  | 0.452153 | 0.423319 | Asf1a/Chaf  |
| GO_BP_m2GO:005090neuromusc5/470     | 125/23843 | 0.10153  | 0.452153 | 0.423319 | Aplp2/Csm   |
| GO_BP_m2GO:003011regulation 9/470   | 279/23843 | 0.102252 | 0.452153 | 0.423319 | Bambi/Dkk   |
| GO_BP_m2GO:000202regulation 4/470   | 90/23843  | 0.102275 | 0.452153 | 0.423319 | Gpd1l/Irx5/ |
| GO_BP_m2GO:004506regulation 4/470   | 90/23843  | 0.102275 | 0.452153 | 0.423319 | Mavs/Oas1   |
| GO_BP_m2GO:005079regulation 4/470   | 90/23843  | 0.102275 | 0.452153 | 0.423319 | Agrp/Csf2/  |
| GO_BP_m2GO:190288regulation 4/470   | 90/23843  | 0.102275 | 0.452153 | 0.423319 | Atf4/Rack1  |
| GO_BP_m2GO:004560positive re3/470   | 57/23843  | 0.102355 | 0.452153 | 0.423319 | Cebpa/Id2/  |
| GO_BP_m2GO:004851circadian b3/470   | 57/23843  | 0.102355 | 0.452153 | 0.423319 | Csf2/Id2/Si |
| GO_BP_m2GO:012003plasma me14/470    | 487/23843 | 0.103728 | 0.452153 | 0.423319 | 2700049AC   |
| GO_BP_m2GO:005067epithelial c12/470 | 403/23843 | 0.103931 | 0.452153 | 0.423319 | Bmp4/Glul,  |
| GO_BP_m2GO:000150ossification11/470 | 362/23843 | 0.10465  | 0.452153 | 0.423319 | Asf1a/Bmp   |
| GO_BP_m2GO:000223positive re2/470   | 28/23843  | 0.104815 | 0.452153 | 0.423319 | Il12rb1/Ma  |
| GO_BP_m2GO:000717regulation 2/470   | 28/23843  | 0.104815 | 0.452153 | 0.423319 | Aplp2/Tsg1  |
| GO_BP_m2GO:002187forebrain r2/470   | 28/23843  | 0.104815 | 0.452153 | 0.423319 | Bmp4/Six3   |
| GO_BP_m2GO:003022monocyte r2/470    | 28/23843  | 0.104815 | 0.452153 | 0.423319 | Bmp4/Csf2   |
| GO_BP_m2GO:190204negative re2/470   | 28/23843  | 0.104815 | 0.452153 | 0.423319 | Faim2/Sfrp  |
| GO_BP_m2GO:190274positive re2/470   | 28/23843  | 0.104815 | 0.452153 | 0.423319 | Auts2/Rac2  |

|                                     |           |          |          |          |              |
|-------------------------------------|-----------|----------|----------|----------|--------------|
| GO_BP_m2GO:190313mononucle2/470     | 28/23843  | 0.104815 | 0.452153 | 0.423319 | Bmp4/Csf2    |
| GO_BP_m2GO:200019regulation 2/470   | 28/23843  | 0.104815 | 0.452153 | 0.423319 | Acsl4/Erfe   |
| GO_BP_m2GO:00365CERAD path 4/470    | 91/23843  | 0.10541  | 0.452153 | 0.423319 | Derl1/Psmc   |
| GO_BP_m2GO:00082Csteroid me'9/470   | 281/23843 | 0.105611 | 0.452153 | 0.423319 | Aplp2/Ceb    |
| GO_BP_m2GO:00320Cnegative re3/470   | 58/23843  | 0.106442 | 0.452153 | 0.423319 | Gatsl2/lftg2 |
| GO_BP_m2GO:00328Cglomerulus3/470    | 58/23843  | 0.106442 | 0.452153 | 0.423319 | Bmp4/Notc    |
| GO_BP_m2GO:004574positive re3/470   | 58/23843  | 0.106442 | 0.452153 | 0.423319 | Bmp4/Csf2    |
| GO_BP_m2GO:00351Cposttranscr5/470   | 127/23843 | 0.10674  | 0.452153 | 0.423319 | Bmp4/Dnd     |
| GO_BP_m2GO:00518Cmembrane 4/470     | 92/23843  | 0.108588 | 0.452153 | 0.423319 | Rack1/Gpd    |
| GO_BP_m2GO:006002roof of mo 4/470   | 92/23843  | 0.108588 | 0.452153 | 0.423319 | Chd7/Col2    |
| GO_BP_m2GO:004851spermatid 6/470    | 165/23843 | 0.108717 | 0.452153 | 0.423319 | H3f3b/Kdnr   |
| GO_BP_m2GO:004694carboxylic ;9/470  | 283/23843 | 0.109031 | 0.452153 | 0.423319 | Slc6a21/Ac   |
| GO_BP_m2GO:00359Cresponse tr5/470   | 128/23843 | 0.109394 | 0.452153 | 0.423319 | Atf4/Derl1/  |
| GO_BP_m2GO:00711C DNA confo7/470    | 204/23843 | 0.109924 | 0.452153 | 0.423319 | Asf1a/Chaf   |
| GO_BP_m2GO:00068Csuperoxide 3/470   | 59/23843  | 0.110592 | 0.452153 | 0.423319 | Cyb5r4/Cyl   |
| GO_BP_m2GO:000762rhythmic b'3/470   | 59/23843  | 0.110592 | 0.452153 | 0.423319 | Csf2/Id2/Si  |
| GO_BP_m2GO:00460CcGMP met:3/470     | 59/23843  | 0.110592 | 0.452153 | 0.423319 | Gucy2c/Pd    |
| GO_BP_m2GO:00609Eendocrine  3/470   | 59/23843  | 0.110592 | 0.452153 | 0.423319 | Cry1/Gdf9/   |
| GO_BP_m2GO:00711Eregulation 3/470   | 59/23843  | 0.110592 | 0.452153 | 0.423319 | Foxo4/Id2/   |
| GO_BP_m2GO:001584organic aci9/470   | 284/23843 | 0.110765 | 0.452153 | 0.423319 | Slc6a21/Ac   |
| GO_BP_m2GO:004352negative re6/470   | 166/23843 | 0.111039 | 0.452153 | 0.423319 | Faim2/Nr4:   |
| GO_BP_m2GO:00019Eendochonc2/470     | 29/23843  | 0.11117  | 0.452153 | 0.423319 | Bmp4/Col2    |
| GO_BP_m2GO:00065Cglutamate 2/470    | 29/23843  | 0.11117  | 0.452153 | 0.423319 | Glul/Oat     |
| GO_BP_m2GO:00330Cpositive re2/470   | 29/23843  | 0.11117  | 0.452153 | 0.423319 | Nr4a3/Stxt   |
| GO_BP_m2GO:003462cellular prc2/470  | 29/23843  | 0.11117  | 0.452153 | 0.423319 | Ralb/Ran     |
| GO_BP_m2GO:003607replacemer2/470    | 29/23843  | 0.11117  | 0.452153 | 0.423319 | Bmp4/Col2    |
| GO_BP_m2GO:00444Emotile ciliu 2/470 | 29/23843  | 0.11117  | 0.452153 | 0.423319 | Mir449b/M    |
| GO_BP_m2GO:00610Cpositive re2/470   | 29/23843  | 0.11117  | 0.452153 | 0.423319 | Bmp4/Gdf6    |
| GO_BP_m2GO:19017Cnegative re2/470   | 29/23843  | 0.11117  | 0.452153 | 0.423319 | Dyrk1a/Pct   |
| GO_BP_m2GO:004364dicarboxyli4/470   | 93/23843  | 0.111808 | 0.452153 | 0.423319 | Kyat3/Glul/  |
| GO_BP_m2GO:190382organic aci4/470   | 93/23843  | 0.111808 | 0.452153 | 0.423319 | Slc6a21/Slc  |
| GO_BP_m2GO:19050Ccarboxylic ;4/470  | 93/23843  | 0.111808 | 0.452153 | 0.423319 | Slc6a21/Slc  |
| GO_BP_m2GO:00034Cplanar cell 1/470  | 6/23843   | 0.112607 | 0.452153 | 0.423319 | Sfrp2        |
| GO_BP_m2GO:00062C'de novo' p1/470   | 6/23843   | 0.112607 | 0.452153 | 0.423319 | Cad          |
| GO_BP_m2GO:000647protein sul1/470   | 6/23843   | 0.112607 | 0.452153 | 0.423319 | Hs3st3b1     |
| GO_BP_m2GO:000667glucosylcer1/470   | 6/23843   | 0.112607 | 0.452153 | 0.423319 | Gba2         |
| GO_BP_m2GO:000697DNA dama1/470      | 6/23843   | 0.112607 | 0.452153 | 0.423319 | Cry1         |
| GO_BP_m2GO:00071Ecommon-p1/470      | 6/23843   | 0.112607 | 0.452153 | 0.423319 | Bmp4         |
| GO_BP_m2GO:00071Cadenylate c1/470   | 6/23843   | 0.112607 | 0.452153 | 0.423319 | Grm7         |
| GO_BP_m2GO:00106Cectoderma 1/470    | 6/23843   | 0.112607 | 0.452153 | 0.423319 | Erf          |
| GO_BP_m2GO:001094positive re1/470   | 6/23843   | 0.112607 | 0.452153 | 0.423319 | Hebp2        |
| GO_BP_m2GO:00158CL-alanine t 1/470  | 6/23843   | 0.112607 | 0.452153 | 0.423319 | Slc36a4      |
| GO_BP_m2GO:001607tRNA catak 1/470   | 6/23843   | 0.112607 | 0.452153 | 0.423319 | Exosc2       |
| GO_BP_m2GO:001974nitrogen ut1/470   | 6/23843   | 0.112607 | 0.452153 | 0.423319 | Glul         |
| GO_BP_m2GO:00198Epyrimidine 1/470   | 6/23843   | 0.112607 | 0.452153 | 0.423319 | Cad          |
| GO_BP_m2GO:003007insulin pro1/470   | 6/23843   | 0.112607 | 0.452153 | 0.423319 | Pcsk2        |
| GO_BP_m2GO:003017regulation 1/470   | 6/23843   | 0.112607 | 0.452153 | 0.423319 | Wdr18        |
| GO_BP_m2GO:003057ubiquitin-c 1/470  | 6/23843   | 0.112607 | 0.452153 | 0.423319 | Tgfb1i1      |

|                   |               |        |           |          |          |          |             |
|-------------------|---------------|--------|-----------|----------|----------|----------|-------------|
| GO_BP_m2GO:003125 | membrane      | 1/470  | 6/23843   | 0.112607 | 0.452153 | 0.423319 | Mbtps2      |
| GO_BP_m2GO:003205 | positive re   | 1/470  | 6/23843   | 0.112607 | 0.452153 | 0.423319 | Slc35a4     |
| GO_BP_m2GO:003251 | endosome      | 1/470  | 6/23843   | 0.112607 | 0.452153 | 0.423319 | Chmp3       |
| GO_BP_m2GO:003276 | mast cell c   | 1/470  | 6/23843   | 0.112607 | 0.452153 | 0.423319 | Nr4a3       |
| GO_BP_m2GO:003296 | regulation    | 1/470  | 6/23843   | 0.112607 | 0.452153 | 0.423319 | Ptk2b       |
| GO_BP_m2GO:003306 | negative re   | 1/470  | 6/23843   | 0.112607 | 0.452153 | 0.423319 | Bmp4        |
| GO_BP_m2GO:003313 | positive re   | 1/470  | 6/23843   | 0.112607 | 0.452153 | 0.423319 | Pfkfb2      |
| GO_BP_m2GO:003316 | positive re   | 1/470  | 6/23843   | 0.112607 | 0.452153 | 0.423319 | Rnf20       |
| GO_BP_m2GO:003376 | response tr   | 1/470  | 6/23843   | 0.112607 | 0.452153 | 0.423319 | Cry1        |
| GO_BP_m2GO:003596 | tendon dev    | 1/470  | 6/23843   | 0.112607 | 0.452153 | 0.423319 | Bmp4        |
| GO_BP_m2GO:004003 | polar body    | 1/470  | 6/23843   | 0.112607 | 0.452153 | 0.423319 | Spire2      |
| GO_BP_m2GO:004279 | snRNA trar    | 1/470  | 6/23843   | 0.112607 | 0.452153 | 0.423319 | Ell         |
| GO_BP_m2GO:004294 | D-amino a     | 1/470  | 6/23843   | 0.112607 | 0.452153 | 0.423319 | Slc7a10     |
| GO_BP_m2GO:004453 | long-chain    | 1/470  | 6/23843   | 0.112607 | 0.452153 | 0.423319 | Slc27a2     |
| GO_BP_m2GO:004483 | G-quadrup     | 1/470  | 6/23843   | 0.112607 | 0.452153 | 0.423319 | Hnrnpa2b1   |
| GO_BP_m2GO:004521 | neurotrans    | 1/470  | 6/23843   | 0.112607 | 0.452153 | 0.423319 | Agrn        |
| GO_BP_m2GO:004647 | glycosylcer   | 1/470  | 6/23843   | 0.112607 | 0.452153 | 0.423319 | Gba2        |
| GO_BP_m2GO:004666 | folic acid r  | 1/470  | 6/23843   | 0.112607 | 0.452153 | 0.423319 | Pm20d2      |
| GO_BP_m2GO:006033 | regulation    | 1/470  | 6/23843   | 0.112607 | 0.452153 | 0.423319 | Mtmr2       |
| GO_BP_m2GO:006066 | regulation    | 1/470  | 6/23843   | 0.112607 | 0.452153 | 0.423319 | Bmp4        |
| GO_BP_m2GO:006093 | positive re   | 1/470  | 6/23843   | 0.112607 | 0.452153 | 0.423319 | Eif4g3      |
| GO_BP_m2GO:006121 | negative re   | 1/470  | 6/23843   | 0.112607 | 0.452153 | 0.423319 | Bmp4        |
| GO_BP_m2GO:006133 | smooth m      | 1/470  | 6/23843   | 0.112607 | 0.452153 | 0.423319 | Plau        |
| GO_BP_m2GO:006131 | BMP signal    | 1/470  | 6/23843   | 0.112607 | 0.452153 | 0.423319 | Bmp4        |
| GO_BP_m2GO:006166 | mitochond     | 1/470  | 6/23843   | 0.112607 | 0.452153 | 0.423319 | Fastkd2     |
| GO_BP_m2GO:007032 | thyroid hor   | 1/470  | 6/23843   | 0.112607 | 0.452153 | 0.423319 | Crym        |
| GO_BP_m2GO:007102 | nuclear ncf   | 1/470  | 6/23843   | 0.112607 | 0.452153 | 0.423319 | Exosc2      |
| GO_BP_m2GO:007103 | nuclear pol   | 1/470  | 6/23843   | 0.112607 | 0.452153 | 0.423319 | Exosc2      |
| GO_BP_m2GO:007104 | nuclear pol   | 1/470  | 6/23843   | 0.112607 | 0.452153 | 0.423319 | Exosc2      |
| GO_BP_m2GO:007204 | comma-sh      | 1/470  | 6/23843   | 0.112607 | 0.452153 | 0.423319 | Bmp4        |
| GO_BP_m2GO:009024 | positive re   | 1/470  | 6/23843   | 0.112607 | 0.452153 | 0.423319 | Auts2       |
| GO_BP_m2GO:009025 | negative re   | 1/470  | 6/23843   | 0.112607 | 0.452153 | 0.423319 | Pink1       |
| GO_BP_m2GO:009026 | positive re   | 1/470  | 6/23843   | 0.112607 | 0.452153 | 0.423319 | Psmc5       |
| GO_BP_m2GO:009963 | neurotrans    | 1/470  | 6/23843   | 0.112607 | 0.452153 | 0.423319 | Rab11a      |
| GO_BP_m2GO:190172 | negative re   | 1/470  | 6/23843   | 0.112607 | 0.452153 | 0.423319 | Bmp4        |
| GO_BP_m2GO:190172 | positive re   | 1/470  | 6/23843   | 0.112607 | 0.452153 | 0.423319 | Pink1       |
| GO_BP_m2GO:190355 | regulation    | 1/470  | 6/23843   | 0.112607 | 0.452153 | 0.423319 | Tsg101      |
| GO_BP_m2GO:200032 | negative re   | 1/470  | 6/23843   | 0.112607 | 0.452153 | 0.423319 | Cry1        |
| GO_BP_m2GO:200061 | regulation    | 1/470  | 6/23843   | 0.112607 | 0.452153 | 0.423319 | Auts2       |
| GO_BP_m2GO:005073 | regulation    | 8/470  | 245/23843 | 0.112981 | 0.453219 | 0.424317 | Agrn/Angp   |
| GO_BP_m2GO:001644 | posttranscr   | 5/470  | 130/23843 | 0.114797 | 0.459215 | 0.429931 | Bmp4/Dnd    |
| GO_BP_m2GO:003292 | circadian r   | 3/470  | 60/23843  | 0.114804 | 0.459215 | 0.429931 | Atf4/Cry1/l |
| GO_BP_m2GO:007147 | cellular res  | 3/470  | 60/23843  | 0.114804 | 0.459215 | 0.429931 | Ect2/H2afx  |
| GO_BP_m2GO:000906 | fatty acid c  | 4/470  | 94/23843  | 0.115071 | 0.459408 | 0.430112 | Acat2/Echc  |
| GO_BP_m2GO:004691 | cellular trar | 4/470  | 94/23843  | 0.115071 | 0.459408 | 0.430112 | Aco1/Aplp:  |
| GO_BP_m2GO:003093 | forebrain d   | 11/470 | 370/23843 | 0.116807 | 0.465453 | 0.435771 | Aplp2/Bmp:  |
| GO_BP_m2GO:005103 | regulation    | 11/470 | 370/23843 | 0.116807 | 0.465453 | 0.435771 | Agrn/Aplp:  |
| GO_BP_m2GO:005507 | transition n  | 5/470  | 131/23843 | 0.117545 | 0.465608 | 0.435917 | Aco1/Aplp:  |

|                   |                    |           |          |          |          |               |
|-------------------|--------------------|-----------|----------|----------|----------|---------------|
| GO_BP_m2GO:000196 | startle resp2/470  | 30/23843  | 0.117623 | 0.465608 | 0.435917 | Csmd1/Per     |
| GO_BP_m2GO:002190 | dorsal/ventl2/470  | 30/23843  | 0.117623 | 0.465608 | 0.435917 | Bmp4/Ift12    |
| GO_BP_m2GO:004353 | negative re2/470   | 30/23843  | 0.117623 | 0.465608 | 0.435917 | Angpt4/Pd     |
| GO_BP_m2GO:005068 | positive re2/470   | 30/23843  | 0.117623 | 0.465608 | 0.435917 | Ncbp2/Thr     |
| GO_BP_m2GO:190343 | regulation 2/470   | 30/23843  | 0.117623 | 0.465608 | 0.435917 | Gatsl2/Iftfg2 |
| GO_BP_m2GO:200014 | positive re2/470   | 30/23843  | 0.117623 | 0.465608 | 0.435917 | Cebpa/Psr     |
| GO_BP_m2GO:000705 | spindle org6/470   | 169/23843 | 0.118156 | 0.466838 | 0.437068 | Aurkb/Cep     |
| GO_BP_m2GO:000721 | Notch sign6/470    | 169/23843 | 0.118156 | 0.466838 | 0.437068 | Angpt4/Ar     |
| GO_BP_m2GO:003304 | regulation 10/470  | 330/23843 | 0.119405 | 0.468277 | 0.438415 | Aurkb/Auts    |
| GO_BP_m2GO:004225 | ribosome t9/470    | 289/23843 | 0.119661 | 0.468277 | 0.438415 | Chd7/Exos     |
| GO_BP_m2GO:001063 | regulation 7/470   | 209/23843 | 0.120539 | 0.468277 | 0.438415 | Angpt4/Br     |
| GO_BP_m2GO:003459 | cellular res8/470  | 249/23843 | 0.120763 | 0.468277 | 0.438415 | Atf4/Bmp4     |
| GO_BP_m2GO:000155 | regulation 12/470  | 415/23843 | 0.121316 | 0.468277 | 0.438415 | Acsl4/Exos    |
| GO_BP_m2GO:004576 | regulation 9/470   | 290/23843 | 0.121486 | 0.468277 | 0.438415 | Angpt4/Cy     |
| GO_BP_m2GO:001052 | regulation 4/470   | 96/23843  | 0.12172  | 0.468277 | 0.438415 | Bmp4/Chd      |
| GO_BP_m2GO:004577 | positive re4/470   | 96/23843  | 0.12172  | 0.468277 | 0.438415 | Bmp4/Ceb      |
| GO_BP_m2GO:006084 | artery deve4/470   | 96/23843  | 0.12172  | 0.468277 | 0.438415 | Ap2b1/Bm      |
| GO_BP_m2GO:009026 | positive re4/470   | 96/23843  | 0.12172  | 0.468277 | 0.438415 | Bambi/Rnf     |
| GO_BP_m2GO:001605 | organic aci7/470   | 210/23843 | 0.122724 | 0.468277 | 0.438415 | Acat2/Echc    |
| GO_BP_m2GO:004639 | carboxylic i7/470  | 210/23843 | 0.122724 | 0.468277 | 0.438415 | Acat2/Echc    |
| GO_BP_m2GO:004352 | regulation 8/470   | 250/23843 | 0.122752 | 0.468277 | 0.438415 | Agrn/Atf4/    |
| GO_BP_m2GO:009028 | negative re5/470   | 133/23843 | 0.123135 | 0.468277 | 0.438415 | Bambi/Sfrp    |
| GO_BP_m2GO:002170 | developme9/470     | 291/23843 | 0.123326 | 0.468277 | 0.438415 | Cebpa/Farf    |
| GO_BP_m2GO:004244 | pigment m3/470     | 62/23843  | 0.123404 | 0.468277 | 0.438415 | Alad/Cox10    |
| GO_BP_m2GO:006004 | retina mor3/470    | 62/23843  | 0.123404 | 0.468277 | 0.438415 | Irx5/Ptprm    |
| GO_BP_m2GO:000177 | natural kill6/470  | 31/23843  | 0.124167 | 0.468277 | 0.438415 | Id2/Zbtb1     |
| GO_BP_m2GO:000633 | DNA replic2/470    | 31/23843  | 0.124167 | 0.468277 | 0.438415 | Asf1a/Chaf    |
| GO_BP_m2GO:001057 | regulation 2/470   | 31/23843  | 0.124167 | 0.468277 | 0.438415 | Atf4/Sulf2    |
| GO_BP_m2GO:003206 | regulation 2/470   | 31/23843  | 0.124167 | 0.468277 | 0.438415 | Oas1b/Oas     |
| GO_BP_m2GO:003239 | DNA geom2/470      | 31/23843  | 0.124167 | 0.468277 | 0.438415 | Hnrnpa2b1     |
| GO_BP_m2GO:003472 | DNA replic2/470    | 31/23843  | 0.124167 | 0.468277 | 0.438415 | Asf1a/Chaf    |
| GO_BP_m2GO:004351 | regulation 2/470   | 31/23843  | 0.124167 | 0.468277 | 0.438415 | Dyrk1a/Pck    |
| GO_BP_m2GO:007162 | positive re2/470   | 31/23843  | 0.124167 | 0.468277 | 0.438415 | Rac2/S100     |
| GO_BP_m2GO:007258 | clathrin-de2/470   | 31/23843  | 0.124167 | 0.468277 | 0.438415 | Arap3/Syt1    |
| GO_BP_m2GO:006144 | connective 8/470   | 251/23843 | 0.124759 | 0.468277 | 0.438415 | Bmp4/Col2     |
| GO_BP_m2GO:004852 | negative re4/470   | 97/23843  | 0.125105 | 0.468277 | 0.438415 | Chmp3/Ma      |
| GO_BP_m2GO:007190 | regulation 12/470  | 418/23843 | 0.125906 | 0.468277 | 0.438415 | Bmp4/Cks1     |
| GO_BP_m2GO:004592 | positive re9/470   | 293/23843 | 0.12705  | 0.468277 | 0.438415 | Acsl4/Agrn    |
| GO_BP_m2GO:002261 | ribonucleo7/470    | 212/23843 | 0.127153 | 0.468277 | 0.438415 | Eif5/Fastkd   |
| GO_BP_m2GO:003003 | lamellipodi3/470   | 63/23843  | 0.12779  | 0.468277 | 0.438415 | Auts2/Rac2    |
| GO_BP_m2GO:004859 | eye morph6/470     | 173/23843 | 0.12799  | 0.468277 | 0.438415 | Bmp4/Ift12    |
| GO_BP_m2GO:004301 | camera-ty10/470    | 335/23843 | 0.128025 | 0.468277 | 0.438415 | Bmp4/Chd      |
| GO_BP_m2GO:000663 | fatty acid n11/470 | 377/23843 | 0.128074 | 0.468277 | 0.438415 | Acaca/Acat    |
| GO_BP_m2GO:000170 | formation 4/470    | 98/23843  | 0.12853  | 0.468277 | 0.438415 | Bmp4/Nr4a     |
| GO_BP_m2GO:005165 | maintenan4/470     | 98/23843  | 0.12853  | 0.468277 | 0.438415 | Fthl17f/Pin   |
| GO_BP_m2GO:003410 | erythrocyte5/470   | 135/23843 | 0.128846 | 0.468277 | 0.438415 | Bmp4/Id2/     |
| GO_BP_m2GO:000045 | exonucleo1/470     | 7/23843   | 0.130104 | 0.468277 | 0.438415 | Exosc2        |
| GO_BP_m2GO:000046 | exonucleo1/470     | 7/23843   | 0.130104 | 0.468277 | 0.438415 | Exosc2        |

|                                |       |         |          |          |          |        |
|--------------------------------|-------|---------|----------|----------|----------|--------|
| GO_BP_m2GO:000257platelet de   | 1/470 | 7/23843 | 0.130104 | 0.468277 | 0.438415 | Stxbp1 |
| GO_BP_m2GO:000312heart induc   | 1/470 | 7/23843 | 0.130104 | 0.468277 | 0.438415 | Bmp4   |
| GO_BP_m2GO:000317aortic valve  | 1/470 | 7/23843 | 0.130104 | 0.468277 | 0.438415 | Bmp4   |
| GO_BP_m2GO:000318aortic valve  | 1/470 | 7/23843 | 0.130104 | 0.468277 | 0.438415 | Bmp4   |
| GO_BP_m2GO:000325cardiac net   | 1/470 | 7/23843 | 0.130104 | 0.468277 | 0.438415 | Bmp4   |
| GO_BP_m2GO:000652arginine bir  | 1/470 | 7/23843 | 0.130104 | 0.468277 | 0.438415 | Cad    |
| GO_BP_m2GO:000672tetrahydro    | 1/470 | 7/23843 | 0.130104 | 0.468277 | 0.438415 | Pcbd1  |
| GO_BP_m2GO:000806Toll signal   | 1/470 | 7/23843 | 0.130104 | 0.468277 | 0.438415 | Palm3  |
| GO_BP_m2GO:000941response tr   | 1/470 | 7/23843 | 0.130104 | 0.468277 | 0.438415 | Sipa1  |
| GO_BP_m2GO:001064regulation    | 1/470 | 7/23843 | 0.130104 | 0.468277 | 0.438415 | Pde4d  |
| GO_BP_m2GO:001082positive re   | 1/470 | 7/23843 | 0.130104 | 0.468277 | 0.438415 | Cep120 |
| GO_BP_m2GO:001098negative re   | 1/470 | 7/23843 | 0.130104 | 0.468277 | 0.438415 | Csk    |
| GO_BP_m2GO:001613glycoside c   | 1/470 | 7/23843 | 0.130104 | 0.468277 | 0.438415 | Gba2   |
| GO_BP_m2GO:002179forebrain d   | 1/470 | 7/23843 | 0.130104 | 0.468277 | 0.438415 | Six3   |
| GO_BP_m2GO:003222positive re   | 1/470 | 7/23843 | 0.130104 | 0.468277 | 0.438415 | Pink1  |
| GO_BP_m2GO:003331meiotic cel   | 1/470 | 7/23843 | 0.130104 | 0.468277 | 0.438415 | Nsun2  |
| GO_BP_m2GO:003575B cell chem   | 1/470 | 7/23843 | 0.130104 | 0.468277 | 0.438415 | Ptk2b  |
| GO_BP_m2GO:003606protein O-    | 1/470 | 7/23843 | 0.130104 | 0.468277 | 0.438415 | Lfng   |
| GO_BP_m2GO:003612histone H3    | 1/470 | 7/23843 | 0.130104 | 0.468277 | 0.438415 | Kdm3a  |
| GO_BP_m2GO:003628peptidyl-se   | 1/470 | 7/23843 | 0.130104 | 0.468277 | 0.438415 | Pink1  |
| GO_BP_m2GO:00363Catrioventric  | 1/470 | 7/23843 | 0.130104 | 0.468277 | 0.438415 | Chd7   |
| GO_BP_m2GO:004266regulation    | 1/470 | 7/23843 | 0.130104 | 0.468277 | 0.438415 | Sfrp2  |
| GO_BP_m2GO:004363polyadenyl    | 1/470 | 7/23843 | 0.130104 | 0.468277 | 0.438415 | Exosc2 |
| GO_BP_m2GO:004574positive re   | 1/470 | 7/23843 | 0.130104 | 0.468277 | 0.438415 | Fgfbp3 |
| GO_BP_m2GO:005065dermatan s    | 1/470 | 7/23843 | 0.130104 | 0.468277 | 0.438415 | Chst12 |
| GO_BP_m2GO:005125mitotic spir  | 1/470 | 7/23843 | 0.130104 | 0.468277 | 0.438415 | Aurkb  |
| GO_BP_m2GO:005146positive re   | 1/470 | 7/23843 | 0.130104 | 0.468277 | 0.438415 | Pex5l  |
| GO_BP_m2GO:005179negative re   | 1/470 | 7/23843 | 0.130104 | 0.468277 | 0.438415 | Dkk4   |
| GO_BP_m2GO:006036regulation    | 1/470 | 7/23843 | 0.130104 | 0.468277 | 0.438415 | Csk    |
| GO_BP_m2GO:006037regulation    | 1/470 | 7/23843 | 0.130104 | 0.468277 | 0.438415 | Gpd1l  |
| GO_BP_m2GO:006044trachea for   | 1/470 | 7/23843 | 0.130104 | 0.468277 | 0.438415 | Bmp4   |
| GO_BP_m2GO:006044bud elong     | 1/470 | 7/23843 | 0.130104 | 0.468277 | 0.438415 | Bmp4   |
| GO_BP_m2GO:006068epithelial-r  | 1/470 | 7/23843 | 0.130104 | 0.468277 | 0.438415 | Bmp4   |
| GO_BP_m2GO:006068regulation    | 1/470 | 7/23843 | 0.130104 | 0.468277 | 0.438415 | Bmp4   |
| GO_BP_m2GO:006078hair follicle | 1/470 | 7/23843 | 0.130104 | 0.468277 | 0.438415 | Dkk4   |
| GO_BP_m2GO:006104regulation    | 1/470 | 7/23843 | 0.130104 | 0.468277 | 0.438415 | Bmp4   |
| GO_BP_m2GO:006107regulation    | 1/470 | 7/23843 | 0.130104 | 0.468277 | 0.438415 | Six3   |
| GO_BP_m2GO:006115pulmonary     | 1/470 | 7/23843 | 0.130104 | 0.468277 | 0.438415 | Bmp4   |
| GO_BP_m2GO:007164regulation    | 1/470 | 7/23843 | 0.130104 | 0.468277 | 0.438415 | Mavs   |
| GO_BP_m2GO:007197extracellula  | 1/470 | 7/23843 | 0.130104 | 0.468277 | 0.438415 | Tsg101 |
| GO_BP_m2GO:007205S-shaped k    | 1/470 | 7/23843 | 0.130104 | 0.468277 | 0.438415 | Bmp4   |
| GO_BP_m2GO:007216mesenchyr     | 1/470 | 7/23843 | 0.130104 | 0.468277 | 0.438415 | Bmp4   |
| GO_BP_m2GO:00722Cmetaneph      | 1/470 | 7/23843 | 0.130104 | 0.468277 | 0.438415 | Bmp4   |
| GO_BP_m2GO:007231clathrin co   | 1/470 | 7/23843 | 0.130104 | 0.468277 | 0.438415 | Sh3gl1 |
| GO_BP_m2GO:008606cell commu    | 1/470 | 7/23843 | 0.130104 | 0.468277 | 0.438415 | Pde4d  |
| GO_BP_m2GO:009741hypoxia-in    | 1/470 | 7/23843 | 0.130104 | 0.468277 | 0.438415 | Cybb   |
| GO_BP_m2GO:009762potassium     | 1/470 | 7/23843 | 0.130104 | 0.468277 | 0.438415 | Kcnh2  |
| GO_BP_m2GO:009891membrane      | 1/470 | 7/23843 | 0.130104 | 0.468277 | 0.438415 | Kcnh2  |

|                                     |           |          |          |          |              |
|-------------------------------------|-----------|----------|----------|----------|--------------|
| GO_BP_m2GO:190134positive reg1/470  | 7/23843   | 0.130104 | 0.468277 | 0.438415 | Bmp4         |
| GO_BP_m2GO:190156fatty acid d1/470  | 7/23843   | 0.130104 | 0.468277 | 0.438415 | Oxct1        |
| GO_BP_m2GO:190172regulation 1/470   | 7/23843   | 0.130104 | 0.468277 | 0.438415 | Pink1        |
| GO_BP_m2GO:190189regulation 1/470   | 7/23843   | 0.130104 | 0.468277 | 0.438415 | Pde4d        |
| GO_BP_m2GO:190330positive reg1/470  | 7/23843   | 0.130104 | 0.468277 | 0.438415 | Pfkfb2       |
| GO_BP_m2GO:190335response tr1/470   | 7/23843   | 0.130104 | 0.468277 | 0.438415 | Atf4         |
| GO_BP_m2GO:190335cellular res1/470  | 7/23843   | 0.130104 | 0.468277 | 0.438415 | Atf4         |
| GO_BP_m2GO:190577regulation 1/470   | 7/23843   | 0.130104 | 0.468277 | 0.438415 | Sfrp2        |
| GO_BP_m2GO:190590regulation 1/470   | 7/23843   | 0.130104 | 0.468277 | 0.438415 | Sfrp2        |
| GO_BP_m2GO:199014intrinsic ap1/470  | 7/23843   | 0.130104 | 0.468277 | 0.438415 | Pink1        |
| GO_BP_m2GO:200013positive reg1/470  | 7/23843   | 0.130104 | 0.468277 | 0.438415 | Bmp4         |
| GO_BP_m2GO:200076negative re1/470   | 7/23843   | 0.130104 | 0.468277 | 0.438415 | Unk          |
| GO_BP_m2GO:200101mesenchyr1/470     | 7/23843   | 0.130104 | 0.468277 | 0.438415 | Bmp4         |
| GO_BP_m2GO:000035spliceosom2/470    | 32/23843  | 0.130796 | 0.468277 | 0.438415 | Prpf31/Snr   |
| GO_BP_m2GO:000698ER-nucleus2/470    | 32/23843  | 0.130796 | 0.468277 | 0.438415 | Atf4/Mbtps   |
| GO_BP_m2GO:000703peroxisom2/470     | 32/23843  | 0.130796 | 0.468277 | 0.438415 | Mavs/Pex5    |
| GO_BP_m2GO:001045regulation 2/470   | 32/23843  | 0.130796 | 0.468277 | 0.438415 | Bmp4/Sfrp    |
| GO_BP_m2GO:004003regulation 2/470   | 32/23843  | 0.130796 | 0.468277 | 0.438415 | Fgfbp3/Sul   |
| GO_BP_m2GO:006029long term 2/470    | 32/23843  | 0.130796 | 0.468277 | 0.438415 | Ptk2b/Stxb   |
| GO_BP_m2GO:006079cell fate co2/470  | 32/23843  | 0.130796 | 0.468277 | 0.438415 | Bmp4/Sfrp    |
| GO_BP_m2GO:190218regulation 2/470   | 32/23843  | 0.130796 | 0.468277 | 0.438415 | Chmp3/Tsc    |
| GO_BP_m2GO:200003regulation 2/470   | 32/23843  | 0.130796 | 0.468277 | 0.438415 | Elavl1/Kdm   |
| GO_BP_m2GO:000963response tr10/470  | 337/23843 | 0.131565 | 0.470628 | 0.440616 | Alad/Ect2/I  |
| GO_BP_m2GO:000979post-embr5/470     | 136/23843 | 0.131746 | 0.470873 | 0.440845 | Aco1/Bmp     |
| GO_BP_m2GO:001975polyol met.4/470   | 99/23843  | 0.131993 | 0.470999 | 0.440964 | Mttr2/Mtr    |
| GO_BP_m2GO:002261ribonucleo12/470   | 422/23843 | 0.132176 | 0.470999 | 0.440964 | Chd7/Eif5/   |
| GO_BP_m2GO:000906glutamine 3/470    | 64/23843  | 0.13223  | 0.470999 | 0.440964 | Cad/Glul/C   |
| GO_BP_m2GO:004333response tr3/470   | 64/23843  | 0.13223  | 0.470999 | 0.440964 | Ifna4/Mavs   |
| GO_BP_m2GO:004828organelle fi13/470 | 466/23843 | 0.133841 | 0.476335 | 0.445959 | Aurkb/Bmq    |
| GO_BP_m2GO:190595regulation 5/470   | 137/23843 | 0.134675 | 0.476399 | 0.446019 | Acat2/Acsl   |
| GO_BP_m2GO:000717transmemk10/470    | 339/23843 | 0.135157 | 0.476399 | 0.446019 | Bambi/Bmq    |
| GO_BP_m2GO:003162receptor in4/470   | 100/23843 | 0.135495 | 0.476399 | 0.446019 | Ap2b1/Cxc    |
| GO_BP_m2GO:005088endocrine 4/470    | 100/23843 | 0.135495 | 0.476399 | 0.446019 | Cry1/Gdf9/   |
| GO_BP_m2GO:003300muscle cell7/470   | 216/23843 | 0.136251 | 0.476399 | 0.446019 | Bmp4/Id2/    |
| GO_BP_m2GO:005118cofactor bi7/470   | 216/23843 | 0.136251 | 0.476399 | 0.446019 | Coq8b/Ala    |
| GO_BP_m2GO:005160defense re7/470    | 216/23843 | 0.136251 | 0.476399 | 0.446019 | Ifna4/Ifnl3/ |
| GO_BP_m2GO:000638transcriptic2/470  | 33/23843  | 0.137505 | 0.476399 | 0.446019 | Cebpa/Ell    |
| GO_BP_m2GO:001057vascular en2/470   | 33/23843  | 0.137505 | 0.476399 | 0.446019 | Atf4/Sulf2   |
| GO_BP_m2GO:001404glutamate 2/470    | 33/23843  | 0.137505 | 0.476399 | 0.446019 | Grm7/Stxb    |
| GO_BP_m2GO:002168cerebellar f2/470  | 33/23843  | 0.137505 | 0.476399 | 0.446019 | Coq8b/Fair   |
| GO_BP_m2GO:004568negative re2/470   | 33/23843  | 0.137505 | 0.476399 | 0.446019 | Bmp4/Id2     |
| GO_BP_m2GO:004574negative re2/470   | 33/23843  | 0.137505 | 0.476399 | 0.446019 | Arrdc1/Lfn   |
| GO_BP_m2GO:004587negative re2/470   | 33/23843  | 0.137505 | 0.476399 | 0.446019 | Ift122/Sall3 |
| GO_BP_m2GO:190109negative re2/470   | 33/23843  | 0.137505 | 0.476399 | 0.446019 | Col2a1/Csf   |
| GO_BP_m2GO:190166quinone m2/470     | 33/23843  | 0.137505 | 0.476399 | 0.446019 | Coq8b/Coc    |
| GO_BP_m2GO:200124negative re2/470   | 33/23843  | 0.137505 | 0.476399 | 0.446019 | Col2a1/Csf   |
| GO_BP_m2GO:000729female gan5/470    | 138/23843 | 0.137633 | 0.476399 | 0.446019 | Gdf9/H3f3l   |
| GO_BP_m2GO:002154cerebellum4/470    | 101/23843 | 0.139034 | 0.476399 | 0.446019 | Coq8b/Fair   |



|                                 |        |           |          |          |          |             |
|---------------------------------|--------|-----------|----------|----------|----------|-------------|
| GO_BP_m2GO:004326regulation     | 4/470  | 101/23843 | 0.139034 | 0.476399 | 0.446019 | Agrn/Atf4/  |
| GO_BP_m2GO:004667response to    | 9/470  | 300/23843 | 0.140551 | 0.476399 | 0.446019 | Alad/Cyb5i  |
| GO_BP_m2GO:006027cilium asse    | 9/470  | 300/23843 | 0.140551 | 0.476399 | 0.446019 | 2700049AC   |
| GO_BP_m2GO:005079regulation     | 6/470  | 178/23843 | 0.140817 | 0.476399 | 0.446019 | Chmp3/Ma    |
| GO_BP_m2GO:000028mitotic cyto   | 3/470  | 66/23843  | 0.141269 | 0.476399 | 0.446019 | Cit/Ect2/Se |
| GO_BP_m2GO:003043ubiquitin-c    | 3/470  | 66/23843  | 0.141269 | 0.476399 | 0.446019 | Der1/Psmc   |
| GO_BP_m2GO:006109regulation     | 3/470  | 66/23843  | 0.141269 | 0.476399 | 0.446019 | Agrn/Aplp2  |
| GO_BP_m2GO:190551non-motile     | 3/470  | 66/23843  | 0.141269 | 0.476399 | 0.446019 | Ift122/Mir1 |
| GO_BP_m2GO:000697response to    | 11/470 | 385/23843 | 0.141655 | 0.476399 | 0.446019 | Atf4/Bmp4   |
| GO_BP_m2GO:003004actin filament | 4/470  | 102/23843 | 0.142609 | 0.476399 | 0.446019 | Frmf6/Gpc   |
| GO_BP_m2GO:004518maintenan      | 4/470  | 102/23843 | 0.142609 | 0.476399 | 0.446019 | Pex5l/Pink1 |
| GO_BP_m2GO:200102regulation     | 4/470  | 102/23843 | 0.142609 | 0.476399 | 0.446019 | Gdf9/Rack1  |
| GO_BP_m2GO:001061positive re    | 2/470  | 34/23843  | 0.144287 | 0.476399 | 0.446019 | Nr4a3/Twfr  |
| GO_BP_m2GO:001474positive re    | 2/470  | 34/23843  | 0.144287 | 0.476399 | 0.446019 | Nr4a3/Twfr  |
| GO_BP_m2GO:001907viral releas   | 2/470  | 34/23843  | 0.144287 | 0.476399 | 0.446019 | Chmp3/Tsc   |
| GO_BP_m2GO:002184cell prolifer  | 2/470  | 34/23843  | 0.144287 | 0.476399 | 0.446019 | Cep120/Six  |
| GO_BP_m2GO:003589exit from h    | 2/470  | 34/23843  | 0.144287 | 0.476399 | 0.446019 | Chmp3/Tsc   |
| GO_BP_m2GO:003589exit from h    | 2/470  | 34/23843  | 0.144287 | 0.476399 | 0.446019 | Chmp3/Tsc   |
| GO_BP_m2GO:005089intestinal a   | 2/470  | 34/23843  | 0.144287 | 0.476399 | 0.446019 | Acat2/Aco1  |
| GO_BP_m2GO:005212movement       | 2/470  | 34/23843  | 0.144287 | 0.476399 | 0.446019 | Chmp3/Tsc   |
| GO_BP_m2GO:005219movement       | 2/470  | 34/23843  | 0.144287 | 0.476399 | 0.446019 | Chmp3/Tsc   |
| GO_BP_m2GO:190379negative re    | 2/470  | 34/23843  | 0.144287 | 0.476399 | 0.446019 | Acsf4/Grm1  |
| GO_BP_m2GO:190121regulation     | 10/470 | 344/23843 | 0.144363 | 0.476399 | 0.446019 | Agrn/Atf4/  |
| GO_BP_m2GO:003027regulation     | 7/470  | 220/23843 | 0.145658 | 0.476399 | 0.446019 | Bmp4/Ceb    |
| GO_BP_m2GO:004592negative re    | 8/470  | 261/23843 | 0.14575  | 0.476399 | 0.446019 | Bmp4/Gdf9   |
| GO_BP_m2GO:000602proteoglyc     | 3/470  | 67/23843  | 0.145864 | 0.476399 | 0.446019 | Chst12/Col  |
| GO_BP_m2GO:000204sprouting      | 4/470  | 103/23843 | 0.146221 | 0.476399 | 0.446019 | Bmp4/Jmjd   |
| GO_BP_m2GO:005123maintenan      | 9/470  | 303/23843 | 0.146553 | 0.476399 | 0.446019 | Chd7/Cry1   |
| GO_BP_m2GO:000320cardiac che    | 5/470  | 141/23843 | 0.146678 | 0.476399 | 0.446019 | Adgrg6/Bn   |
| GO_BP_m2GO:003461cellular res   | 5/470  | 141/23843 | 0.146678 | 0.476399 | 0.446019 | Ect2/Rack1  |
| GO_BP_m2GO:009900vesicle-me     | 5/470  | 141/23843 | 0.146678 | 0.476399 | 0.446019 | Bloc1s2/Cp  |
| GO_BP_m2GO:000002mitotic spir   | 1/470  | 8/23843   | 0.147257 | 0.476399 | 0.446019 | Aurkb       |
| GO_BP_m2GO:000005citrulline m   | 1/470  | 8/23843   | 0.147257 | 0.476399 | 0.446019 | Cad         |
| GO_BP_m2GO:000005ribosomal      | 1/470  | 8/23843   | 0.147257 | 0.476399 | 0.446019 | Ran         |
| GO_BP_m2GO:000151selenocyste    | 1/470  | 8/23843   | 0.147257 | 0.476399 | 0.446019 | Trnau1ap    |
| GO_BP_m2GO:000177plasma me      | 1/470  | 8/23843   | 0.147257 | 0.476399 | 0.446019 | Syt11       |
| GO_BP_m2GO:000182inner cell     | 1/470  | 8/23843   | 0.147257 | 0.476399 | 0.446019 | Lats2       |
| GO_BP_m2GO:000645translation    | 1/470  | 8/23843   | 0.147257 | 0.476399 | 0.446019 | Trnau1ap    |
| GO_BP_m2GO:000740negative re    | 1/470  | 8/23843   | 0.147257 | 0.476399 | 0.446019 | Vax1        |
| GO_BP_m2GO:0009457-methylg      | 1/470  | 8/23843   | 0.147257 | 0.476399 | 0.446019 | Tgs1        |
| GO_BP_m2GO:000999negative re    | 1/470  | 8/23843   | 0.147257 | 0.476399 | 0.446019 | Sfrp2       |
| GO_BP_m2GO:001658nucleosom      | 1/470  | 8/23843   | 0.147257 | 0.476399 | 0.446019 | Hist1h1e    |
| GO_BP_m2GO:001718peptidyl-ly    | 1/470  | 8/23843   | 0.147257 | 0.476399 | 0.446019 | Jmjd6       |
| GO_BP_m2GO:001834protein ger    | 1/470  | 8/23843   | 0.147257 | 0.476399 | 0.446019 | Agrn        |
| GO_BP_m2GO:002160cranial ner    | 1/470  | 8/23843   | 0.147257 | 0.476399 | 0.446019 | Mafb        |
| GO_BP_m2GO:002186forebrain r    | 1/470  | 8/23843   | 0.147257 | 0.476399 | 0.446019 | Mettl14     |
| GO_BP_m2GO:002191smoothen       | 1/470  | 8/23843   | 0.147257 | 0.476399 | 0.446019 | Ift122      |
| GO_BP_m2GO:003030regulation     | 1/470  | 8/23843   | 0.147257 | 0.476399 | 0.446019 | Acat2       |

|                                      |         |          |          |          |           |
|--------------------------------------|---------|----------|----------|----------|-----------|
| GO_BP_m2GO:003105primary mi 1/470    | 8/23843 | 0.147257 | 0.476399 | 0.446019 | Hnrnpa2b1 |
| GO_BP_m2GO:003112snoRNA 3' 1/470     | 8/23843 | 0.147257 | 0.476399 | 0.446019 | Exosc2    |
| GO_BP_m2GO:003144negative re1/470    | 8/23843 | 0.147257 | 0.476399 | 0.446019 | Rnf20     |
| GO_BP_m2GO:003222negative re1/470    | 8/23843 | 0.147257 | 0.476399 | 0.446019 | Stxbp1    |
| GO_BP_m2GO:003262interleukin 1/470   | 8/23843 | 0.147257 | 0.476399 | 0.446019 | Csf2      |
| GO_BP_m2GO:003266regulation 1/470    | 8/23843 | 0.147257 | 0.476399 | 0.446019 | Csf2      |
| GO_BP_m2GO:00332C meiotic cyt 1/470  | 8/23843 | 0.147257 | 0.476399 | 0.446019 | Spire2    |
| GO_BP_m2GO:003421protein he>1/470    | 8/23843 | 0.147257 | 0.476399 | 0.446019 | Oat       |
| GO_BP_m2GO:003447U4 snRNA 1/470      | 8/23843 | 0.147257 | 0.476399 | 0.446019 | Exosc2    |
| GO_BP_m2GO:00380Fc-gamma 1/470       | 8/23843 | 0.147257 | 0.476399 | 0.446019 | Myo1g     |
| GO_BP_m2GO:004204epithelial fl 1/470 | 8/23843 | 0.147257 | 0.476399 | 0.446019 | Csf2      |
| GO_BP_m2GO:004263negative re1/470    | 8/23843 | 0.147257 | 0.476399 | 0.446019 | Dkk4      |
| GO_BP_m2GO:004276very long-c1/470    | 8/23843 | 0.147257 | 0.476399 | 0.446019 | Slc27a2   |
| GO_BP_m2GO:004279snRNA trar1/470     | 8/23843 | 0.147257 | 0.476399 | 0.446019 | Ell       |
| GO_BP_m2GO:004363polyadenyl 1/470    | 8/23843 | 0.147257 | 0.476399 | 0.446019 | Exosc2    |
| GO_BP_m2GO:004482positive reç1/470   | 8/23843 | 0.147257 | 0.476399 | 0.446019 | Ppib      |
| GO_BP_m2GO:004502G0 to G1 tr1/470    | 8/23843 | 0.147257 | 0.476399 | 0.446019 | Foxo4     |
| GO_BP_m2GO:004606cGMP cata 1/470     | 8/23843 | 0.147257 | 0.476399 | 0.446019 | Pde1a     |
| GO_BP_m2GO:004863regulation 1/470    | 8/23843 | 0.147257 | 0.476399 | 0.446019 | Tll2      |
| GO_BP_m2GO:005145regulation 1/470    | 8/23843 | 0.147257 | 0.476399 | 0.446019 | Pex5l     |
| GO_BP_m2GO:005166establishm1/470     | 8/23843 | 0.147257 | 0.476399 | 0.446019 | Pdcd10    |
| GO_BP_m2GO:006004retinal bipc1/470   | 8/23843 | 0.147257 | 0.476399 | 0.446019 | Irx5      |
| GO_BP_m2GO:006036cranial sutl 1/470  | 8/23843 | 0.147257 | 0.476399 | 0.446019 | Bmp4      |
| GO_BP_m2GO:006067ureteric bu 1/470   | 8/23843 | 0.147257 | 0.476399 | 0.446019 | Bmp4      |
| GO_BP_m2GO:006075regulation 1/470    | 8/23843 | 0.147257 | 0.476399 | 0.446019 | Rac2      |
| GO_BP_m2GO:006162pharyngeal1/470     | 8/23843 | 0.147257 | 0.476399 | 0.446019 | Bmp4      |
| GO_BP_m2GO:007012tRNA amin 1/470     | 8/23843 | 0.147257 | 0.476399 | 0.446019 | Wars2     |
| GO_BP_m2GO:007031regulation 1/470    | 8/23843 | 0.147257 | 0.476399 | 0.446019 | Foxo4     |
| GO_BP_m2GO:007149cellular resj1/470  | 8/23843 | 0.147257 | 0.476399 | 0.446019 | Mfap4     |
| GO_BP_m2GO:00716C chemokine 1/470    | 8/23843 | 0.147257 | 0.476399 | 0.446019 | Mavs      |
| GO_BP_m2GO:00722C negative re1/470   | 8/23843 | 0.147257 | 0.476399 | 0.446019 | Bmp4      |
| GO_BP_m2GO:007231vesicle unc 1/470   | 8/23843 | 0.147257 | 0.476399 | 0.446019 | Sh3gl1    |
| GO_BP_m2GO:008502protein K6 1/470    | 8/23843 | 0.147257 | 0.476399 | 0.446019 | Rnf6      |
| GO_BP_m2GO:009028cytoskeleta1/470    | 8/23843 | 0.147257 | 0.476399 | 0.446019 | Syne3     |
| GO_BP_m2GO:009706ncRNA exp 1/470     | 8/23843 | 0.147257 | 0.476399 | 0.446019 | Phax      |
| GO_BP_m2GO:009706anterior he 1/470   | 8/23843 | 0.147257 | 0.476399 | 0.446019 | Col2a1    |
| GO_BP_m2GO:190036negative re1/470    | 8/23843 | 0.147257 | 0.476399 | 0.446019 | Rnf20     |
| GO_BP_m2GO:190129negative re1/470    | 8/23843 | 0.147257 | 0.476399 | 0.446019 | Pink1     |
| GO_BP_m2GO:190185positive reç1/470   | 8/23843 | 0.147257 | 0.476399 | 0.446019 | Pink1     |
| GO_BP_m2GO:190286regulation 1/470    | 8/23843 | 0.147257 | 0.476399 | 0.446019 | Six3      |
| GO_BP_m2GO:190314negative re1/470    | 8/23843 | 0.147257 | 0.476399 | 0.446019 | Pink1     |
| GO_BP_m2GO:190336regulation 1/470    | 8/23843 | 0.147257 | 0.476399 | 0.446019 | Penk      |
| GO_BP_m2GO:19038C positive reç1/470  | 8/23843 | 0.147257 | 0.476399 | 0.446019 | Bmp4      |
| GO_BP_m2GO:190415negative re1/470    | 8/23843 | 0.147257 | 0.476399 | 0.446019 | Ube2j1    |
| GO_BP_m2GO:190446negative re1/470    | 8/23843 | 0.147257 | 0.476399 | 0.446019 | Syt11     |
| GO_BP_m2GO:19905C dense core 1/470   | 8/23843 | 0.147257 | 0.476399 | 0.446019 | Stxbp1    |
| GO_BP_m2GO:200019negative re1/470    | 8/23843 | 0.147257 | 0.476399 | 0.446019 | Acsl4     |
| GO_BP_m2GO:200048negative re1/470    | 8/23843 | 0.147257 | 0.476399 | 0.446019 | Prkar1a   |

|                                     |           |          |          |          |             |
|-------------------------------------|-----------|----------|----------|----------|-------------|
| GO_BP_m2GO:200054negative re1/470   | 8/23843   | 0.147257 | 0.476399 | 0.446019 | Sfrp2       |
| GO_BP_m2GO:200064positive re1/470   | 8/23843   | 0.147257 | 0.476399 | 0.446019 | Mtmr2       |
| GO_BP_m2GO:200082regulation 1/470   | 8/23843   | 0.147257 | 0.476399 | 0.446019 | Penk        |
| GO_BP_m2GO:003133negative re7/470   | 221/23843 | 0.148057 | 0.47862  | 0.448098 | Alad/Dhx3   |
| GO_BP_m2GO:003030negative re6/470   | 181/23843 | 0.14879  | 0.480617 | 0.449968 | Gdf9/Rack   |
| GO_BP_m2GO:003528segmentati4/470    | 104/23843 | 0.149868 | 0.483728 | 0.452881 | Bmp4/Lfng   |
| GO_BP_m2GO:004230regulation 3/470   | 68/23843  | 0.150508 | 0.483733 | 0.452885 | Bmp4/Ect2   |
| GO_BP_m2GO:004329leukocyte c3/470   | 68/23843  | 0.150508 | 0.483733 | 0.452885 | Nr4a3/Rac   |
| GO_BP_m2GO:004557mast cell ar3/470  | 68/23843  | 0.150508 | 0.483733 | 0.452885 | Nr4a3/Rac   |
| GO_BP_m2GO:003300regulation 2/470   | 35/23843  | 0.151138 | 0.483733 | 0.452885 | Rac2/Stxbp  |
| GO_BP_m2GO:003579positive re2/470   | 35/23843  | 0.151138 | 0.483733 | 0.452885 | Bloc1s2/He  |
| GO_BP_m2GO:004255pteridine-c2/470   | 35/23843  | 0.151138 | 0.483733 | 0.452885 | Pcbd1/Pm    |
| GO_BP_m2GO:004330regulation 2/470   | 35/23843  | 0.151138 | 0.483733 | 0.452885 | Rac2/Stxbp  |
| GO_BP_m2GO:005145intracellula2/470  | 35/23843  | 0.151138 | 0.483733 | 0.452885 | Atp6v1h/G   |
| GO_BP_m2GO:005197positive re2/470   | 35/23843  | 0.151138 | 0.483733 | 0.452885 | Aurkb/Hnri  |
| GO_BP_m2GO:190435positive re2/470   | 35/23843  | 0.151138 | 0.483733 | 0.452885 | Aurkb/Hnri  |
| GO_BP_m2GO:200078regulation 2/470   | 35/23843  | 0.151138 | 0.483733 | 0.452885 | Pink1/Ralb  |
| GO_BP_m2GO:003053adult beha6/470    | 182/23843 | 0.151491 | 0.484495 | 0.453599 | Agrp/Chd7   |
| GO_BP_m2GO:000673coenzyme 9/470     | 306/23843 | 0.152683 | 0.487551 | 0.456459 | Acaca/Coq   |
| GO_BP_m2GO:000323cardiac ver5/470   | 143/23843 | 0.152845 | 0.487551 | 0.456459 | Ap2b1/Bm    |
| GO_BP_m2GO:000918cyclic nucle5/470  | 143/23843 | 0.152845 | 0.487551 | 0.456459 | Rack1/Guc   |
| GO_BP_m2GO:007182ribonucleo7/470    | 223/23843 | 0.152911 | 0.487551 | 0.456459 | Eif5/Fastkd |
| GO_BP_m2GO:003496histone lysi4/470  | 105/23843 | 0.15355  | 0.487951 | 0.456834 | Auts2/Hist  |
| GO_BP_m2GO:007190negative re4/470   | 105/23843 | 0.15355  | 0.487951 | 0.456834 | Bmp4/Lats   |
| GO_BP_m2GO:009010negative re4/470   | 105/23843 | 0.15355  | 0.487951 | 0.456834 | Bambi/Sfrp  |
| GO_BP_m2GO:006007canonical v8/470   | 265/23843 | 0.154604 | 0.487951 | 0.456834 | Bambi/Dkk   |
| GO_BP_m2GO:004213negative re3/470   | 69/23843  | 0.155198 | 0.487951 | 0.456834 | Bmp4/Prka   |
| GO_BP_m2GO:200057positive re3/470   | 69/23843  | 0.155198 | 0.487951 | 0.456834 | Aurkb/Hnri  |
| GO_BP_m2GO:000340axis elonga2/470   | 36/23843  | 0.158051 | 0.487951 | 0.456834 | Bmp4/Sfrp   |
| GO_BP_m2GO:001025multicellula2/470  | 36/23843  | 0.158051 | 0.487951 | 0.456834 | Sec63/Serp  |
| GO_BP_m2GO:003106positive re2/470   | 36/23843  | 0.158051 | 0.487951 | 0.456834 | Auts2/Rnf2  |
| GO_BP_m2GO:004683phospholip2/470    | 36/23843  | 0.158051 | 0.487951 | 0.456834 | Mtmr2/Mtr   |
| GO_BP_m2GO:006025regulation 2/470   | 36/23843  | 0.158051 | 0.487951 | 0.456834 | Agrp/Nr4a   |
| GO_BP_m2GO:006138heart trabe2/470   | 36/23843  | 0.158051 | 0.487951 | 0.456834 | Adgrg6/Ch   |
| GO_BP_m2GO:190269regulation 2/470   | 36/23843  | 0.158051 | 0.487951 | 0.456834 | Six3/Vax1   |
| GO_BP_m2GO:001059regulation 5/470   | 145/23843 | 0.159118 | 0.487951 | 0.456834 | Angpt4/Br   |
| GO_BP_m2GO:000606alcohol me8/470    | 267/23843 | 0.159126 | 0.487951 | 0.456834 | Aplp2/Ceb   |
| GO_BP_m2GO:004545bone resor3/470    | 70/23843  | 0.159933 | 0.487951 | 0.456834 | Csk/Ptk2b/  |
| GO_BP_m2GO:004874muscle fibe3/470   | 70/23843  | 0.159933 | 0.487951 | 0.456834 | Bmp4/Klhl   |
| GO_BP_m2GO:004884artery mor3/470    | 70/23843  | 0.159933 | 0.487951 | 0.456834 | Bmp4/Chd    |
| GO_BP_m2GO:200024positive re3/470   | 70/23843  | 0.159933 | 0.487951 | 0.456834 | Eif4g3/Lfng |
| GO_BP_m2GO:000641translation4/470   | 107/23843 | 0.161014 | 0.487951 | 0.456834 | Ddx3y/Eif4  |
| GO_BP_m2GO:001907viral genon4/470   | 107/23843 | 0.161014 | 0.487951 | 0.456834 | Mavs/Oas1   |
| GO_BP_m2GO:004275regulation 4/470   | 107/23843 | 0.161014 | 0.487951 | 0.456834 | Cry1/Csf2/  |
| GO_BP_m2GO:005102mRNA tran4/470     | 107/23843 | 0.161014 | 0.487951 | 0.456834 | Hnrnpa2b1   |
| GO_BP_m2GO:004666female sex 5/470   | 146/23843 | 0.162294 | 0.487951 | 0.456834 | Bmp4/Chd    |
| GO_BP_m2GO:004211T cell activ13/470 | 484/23843 | 0.162752 | 0.487951 | 0.456834 | Bmp4/Chd    |
| GO_BP_m2GO:000018chromatin 1/470    | 9/23843   | 0.164072 | 0.487951 | 0.456834 | Rrp8        |

|                                     |         |          |          |          |         |
|-------------------------------------|---------|----------|----------|----------|---------|
| GO_BP_m2GO:000024spliceosom1/470    | 9/23843 | 0.164072 | 0.487951 | 0.456834 | Prpf31  |
| GO_BP_m2GO:000313secondary 1/470    | 9/23843 | 0.164072 | 0.487951 | 0.456834 | Bmp4    |
| GO_BP_m2GO:000322ventricular 1/470  | 9/23843 | 0.164072 | 0.487951 | 0.456834 | Chd7    |
| GO_BP_m2GO:000601mannose n1/470     | 9/23843 | 0.164072 | 0.487951 | 0.456834 | Man2c1  |
| GO_BP_m2GO:000622UTP biosyn1/470    | 9/23843 | 0.164072 | 0.487951 | 0.456834 | Cad     |
| GO_BP_m2GO:000655L-phenylal:1/470   | 9/23843 | 0.164072 | 0.487951 | 0.456834 | Pcbd1   |
| GO_BP_m2GO:000656proline me 1/470   | 9/23843 | 0.164072 | 0.487951 | 0.456834 | Oat     |
| GO_BP_m2GO:000834adult feedi1/470   | 9/23843 | 0.164072 | 0.487951 | 0.456834 | Agrp    |
| GO_BP_m2GO:00108Cregulation 1/470   | 9/23843 | 0.164072 | 0.487951 | 0.456834 | Stxbp1  |
| GO_BP_m2GO:00140Enegative re1/470   | 9/23843 | 0.164072 | 0.487951 | 0.456834 | Grm7    |
| GO_BP_m2GO:001582proline trar1/470  | 9/23843 | 0.164072 | 0.487951 | 0.456834 | Slc36a4 |
| GO_BP_m2GO:002154rhombome1/470      | 9/23843 | 0.164072 | 0.487951 | 0.456834 | Mafb    |
| GO_BP_m2GO:00218Eolfactory b 1/470  | 9/23843 | 0.164072 | 0.487951 | 0.456834 | Sall3   |
| GO_BP_m2GO:00302Cchondroitir1/470   | 9/23843 | 0.164072 | 0.487951 | 0.456834 | Chst12  |
| GO_BP_m2GO:003022neutrophil 1/470   | 9/23843 | 0.164072 | 0.487951 | 0.456834 | Csf2    |
| GO_BP_m2GO:003144positive reç1/470  | 9/23843 | 0.164072 | 0.487951 | 0.456834 | Ncbp2   |
| GO_BP_m2GO:003164negative re1/470   | 9/23843 | 0.164072 | 0.487951 | 0.456834 | Mtmr2   |
| GO_BP_m2GO:00328Eglomerular1/470    | 9/23843 | 0.164072 | 0.487951 | 0.456834 | Sulf2   |
| GO_BP_m2GO:003497protein folc1/470  | 9/23843 | 0.164072 | 0.487951 | 0.456834 | Emc4    |
| GO_BP_m2GO:00362E RNA cappi1/470    | 9/23843 | 0.164072 | 0.487951 | 0.456834 | Tgs1    |
| GO_BP_m2GO:00364Eneuron intr1/470   | 9/23843 | 0.164072 | 0.487951 | 0.456834 | Pink1   |
| GO_BP_m2GO:00421Eketone cat:1/470   | 9/23843 | 0.164072 | 0.487951 | 0.456834 | Oxct1   |
| GO_BP_m2GO:00433Eenucleate e1/470   | 9/23843 | 0.164072 | 0.487951 | 0.456834 | Id2     |
| GO_BP_m2GO:004614tetrahydrol1/470   | 9/23843 | 0.164072 | 0.487951 | 0.456834 | Pcbd1   |
| GO_BP_m2GO:00512E spindle elo1/470  | 9/23843 | 0.164072 | 0.487951 | 0.456834 | Aurkb   |
| GO_BP_m2GO:00512E spindle mic1/470  | 9/23843 | 0.164072 | 0.487951 | 0.456834 | Aurkb   |
| GO_BP_m2GO:006002convergent1/470    | 9/23843 | 0.164072 | 0.487951 | 0.456834 | Sfrp2   |
| GO_BP_m2GO:00601Eembryonic 1/470    | 9/23843 | 0.164072 | 0.487951 | 0.456834 | Acsl4   |
| GO_BP_m2GO:00605Emammary 1/470      | 9/23843 | 0.164072 | 0.487951 | 0.456834 | Bmp4    |
| GO_BP_m2GO:00610Cpattern spe1/470   | 9/23843 | 0.164072 | 0.487951 | 0.456834 | Bmp4    |
| GO_BP_m2GO:00701Ekynurenine1/470    | 9/23843 | 0.164072 | 0.487951 | 0.456834 | Kyat3   |
| GO_BP_m2GO:00708Enegative re1/470   | 9/23843 | 0.164072 | 0.487951 | 0.456834 | Ube2j1  |
| GO_BP_m2GO:00714Ecellular res1/470  | 9/23843 | 0.164072 | 0.487951 | 0.456834 | Sfrp2   |
| GO_BP_m2GO:007187response tr1/470   | 9/23843 | 0.164072 | 0.487951 | 0.456834 | Pde4d   |
| GO_BP_m2GO:007187cellular res1/470  | 9/23843 | 0.164072 | 0.487951 | 0.456834 | Pde4d   |
| GO_BP_m2GO:007201glomerular1/470    | 9/23843 | 0.164072 | 0.487951 | 0.456834 | Bmp4    |
| GO_BP_m2GO:007204renal syste1/470   | 9/23843 | 0.164072 | 0.487951 | 0.456834 | Bmp4    |
| GO_BP_m2GO:007221negative re1/470   | 9/23843 | 0.164072 | 0.487951 | 0.456834 | Bmp4    |
| GO_BP_m2GO:007231glomerular1/470    | 9/23843 | 0.164072 | 0.487951 | 0.456834 | Bmp4    |
| GO_BP_m2GO:007264type I inter 1/470 | 9/23843 | 0.164072 | 0.487951 | 0.456834 | Mavs    |
| GO_BP_m2GO:007264interferon- 1/470  | 9/23843 | 0.164072 | 0.487951 | 0.456834 | Mavs    |
| GO_BP_m2GO:00860Eregulation 1/470   | 9/23843 | 0.164072 | 0.487951 | 0.456834 | Agrn    |
| GO_BP_m2GO:009004positive reç1/470  | 9/23843 | 0.164072 | 0.487951 | 0.456834 | Pink1   |
| GO_BP_m2GO:009877positive reç1/470  | 9/23843 | 0.164072 | 0.487951 | 0.456834 | Pink1   |
| GO_BP_m2GO:00996Eendosome 1/470     | 9/23843 | 0.164072 | 0.487951 | 0.456834 | Rab11a  |
| GO_BP_m2GO:19001Enegative re1/470   | 9/23843 | 0.164072 | 0.487951 | 0.456834 | Syt11   |
| GO_BP_m2GO:190152positive reç1/470  | 9/23843 | 0.164072 | 0.487951 | 0.456834 | Pink1   |
| GO_BP_m2GO:190222erythrose 41/470   | 9/23843 | 0.164072 | 0.487951 | 0.456834 | Pcbd1   |

|                                     |           |          |          |          |              |
|-------------------------------------|-----------|----------|----------|----------|--------------|
| GO_BP_m2GO:190273regulation 1/470   | 9/23843   | 0.164072 | 0.487951 | 0.456834 | Mavs         |
| GO_BP_m2GO:190274positive reg1/470  | 9/23843   | 0.164072 | 0.487951 | 0.456834 | Mavs         |
| GO_BP_m2GO:190337regulation 1/470   | 9/23843   | 0.164072 | 0.487951 | 0.456834 | Pink1        |
| GO_BP_m2GO:190386positive reg1/470  | 9/23843   | 0.164072 | 0.487951 | 0.456834 | Pink1        |
| GO_BP_m2GO:190433regulation 1/470   | 9/23843   | 0.164072 | 0.487951 | 0.456834 | Sfrp2        |
| GO_BP_m2GO:190439regulation 1/470   | 9/23843   | 0.164072 | 0.487951 | 0.456834 | Agrn         |
| GO_BP_m2GO:190472regulation 1/470   | 9/23843   | 0.164072 | 0.487951 | 0.456834 | Acat2        |
| GO_BP_m2GO:190545regulation 1/470   | 9/23843   | 0.164072 | 0.487951 | 0.456834 | Zbtb1        |
| GO_BP_m2GO:200005negative re1/470   | 9/23843   | 0.164072 | 0.487951 | 0.456834 | Sfrp2        |
| GO_BP_m2GO:200038negative re1/470   | 9/23843   | 0.164072 | 0.487951 | 0.456834 | Sfrp2        |
| GO_BP_m2GO:200064regulation 1/470   | 9/23843   | 0.164072 | 0.487951 | 0.456834 | Mtmt2        |
| GO_BP_m2GO:004273embryonic 3/470    | 71/23843  | 0.164712 | 0.487951 | 0.456834 | Bmp4/Ift12   |
| GO_BP_m2GO:000008G2/M trans4/470    | 108/23843 | 0.164795 | 0.487951 | 0.456834 | Cit/Foxo4/I  |
| GO_BP_m2GO:000698response tr4/470   | 108/23843 | 0.164795 | 0.487951 | 0.456834 | Atf4/Derl1/  |
| GO_BP_m2GO:001092cellular cor4/470  | 108/23843 | 0.164795 | 0.487951 | 0.456834 | Klhl41/Mtn   |
| GO_BP_m2GO:003524synaptic tr4/470   | 108/23843 | 0.164795 | 0.487951 | 0.456834 | Glul/Grm7/   |
| GO_BP_m2GO:007134cellular res4/470  | 108/23843 | 0.164795 | 0.487951 | 0.456834 | Eprs/I12rb   |
| GO_BP_m2GO:000018nuclear-tra2/470   | 37/23843  | 0.165022 | 0.487951 | 0.456834 | Dhx34/Nct    |
| GO_BP_m2GO:001623telomere c2/470    | 37/23843  | 0.165022 | 0.487951 | 0.456834 | Aurkb/Hnri   |
| GO_BP_m2GO:003085granulocyte2/470   | 37/23843  | 0.165022 | 0.487951 | 0.456834 | Cebpa/Csf2   |
| GO_BP_m2GO:003312positive reg2/470  | 37/23843  | 0.165022 | 0.487951 | 0.456834 | Dyrk1a/Thr   |
| GO_BP_m2GO:00382C TORC1 sign2/470   | 37/23843  | 0.165022 | 0.487951 | 0.456834 | Gatsl2/Iftg2 |
| GO_BP_m2GO:00460C regulation 2/470  | 37/23843  | 0.165022 | 0.487951 | 0.456834 | I12rb1/Prk   |
| GO_BP_m2GO:004616alcohol cat2/470   | 37/23843  | 0.165022 | 0.487951 | 0.456834 | Mtmt2/Mtr    |
| GO_BP_m2GO:004825mRNA stat2/470     | 37/23843  | 0.165022 | 0.487951 | 0.456834 | Elavl1/Thra  |
| GO_BP_m2GO:00726C interleukin-2/470 | 37/23843  | 0.165022 | 0.487951 | 0.456834 | Mavs/Syt11   |
| GO_BP_m2GO:190571positive reg2/470  | 37/23843  | 0.165022 | 0.487951 | 0.456834 | Bloc1s2/He   |
| GO_BP_m2GO:200014regulation 2/470   | 37/23843  | 0.165022 | 0.487951 | 0.456834 | Cebpa/Psr    |
| GO_BP_m2GO:00032C cardiac cha6/470  | 187/23843 | 0.165323 | 0.487951 | 0.456834 | Adgrg6/Ap    |
| GO_BP_m2GO:00060C glucose me6/470   | 187/23843 | 0.165323 | 0.487951 | 0.456834 | Atf4/Cry1/I  |
| GO_BP_m2GO:004424cellular lipi6/470 | 187/23843 | 0.165323 | 0.487951 | 0.456834 | Acat2/Echc   |
| GO_BP_m2GO:000756aging 7/470        | 228/23843 | 0.165364 | 0.487951 | 0.456834 | Id2/Mirlet7  |
| GO_BP_m2GO:000007mitotic sist5/470  | 147/23843 | 0.165495 | 0.487996 | 0.456876 | Aurkb/Cit/I  |
| GO_BP_m2GO:004578negative re12/470  | 442/23843 | 0.166019 | 0.489195 | 0.457999 | Aurkb/Bmp4   |
| GO_BP_m2GO:000693smooth m4/470      | 109/23843 | 0.168608 | 0.495781 | 0.464165 | Myh11/Pde    |
| GO_BP_m2GO:000995dorsal/vent4/470   | 109/23843 | 0.168608 | 0.495781 | 0.464165 | Bmp4/Ift12   |
| GO_BP_m2GO:004407regulation 4/470   | 109/23843 | 0.168608 | 0.495781 | 0.464165 | Acsl4/Erfe/  |
| GO_BP_m2GO:00305C regulation 3/470  | 72/23843  | 0.169533 | 0.498152 | 0.466385 | Bmp4/Nbr1    |
| GO_BP_m2GO:007123cellular res6/470  | 189/23843 | 0.171002 | 0.501414 | 0.469439 | Ect2/Rack1   |
| GO_BP_m2GO:00718C cellular pot6/470 | 189/23843 | 0.171002 | 0.501414 | 0.469439 | Agrn/Kcne2   |
| GO_BP_m2GO:00718C potassium 6/470   | 189/23843 | 0.171002 | 0.501414 | 0.469439 | Agrn/Kcne2   |
| GO_BP_m2GO:003105regulation 5/470   | 149/23843 | 0.171972 | 0.50237  | 0.470334 | Auts2/Kdm    |
| GO_BP_m2GO:003252protein exit2/470  | 38/23843  | 0.172046 | 0.50237  | 0.470334 | Derl1/Ube2   |
| GO_BP_m2GO:004408regulation 2/470   | 38/23843  | 0.172046 | 0.50237  | 0.470334 | Pink1/Ralb   |
| GO_BP_m2GO:004502plasma me2/470     | 38/23843  | 0.172046 | 0.50237  | 0.470334 | Izumo1r/St   |
| GO_BP_m2GO:005043amyloid-b2/470     | 38/23843  | 0.172046 | 0.50237  | 0.470334 | Bace1/Dyrk   |
| GO_BP_m2GO:190595negative re2/470   | 38/23843  | 0.172046 | 0.50237  | 0.470334 | Acsl4/Cry1   |
| GO_BP_m2GO:000858female gor4/470    | 110/23843 | 0.172452 | 0.502855 | 0.470788 | Bmp4/Gdf9    |

|                                 |        |           |          |          |          |             |
|---------------------------------|--------|-----------|----------|----------|----------|-------------|
| GO_BP_m2GO:003051intracellula   | 4/470  | 110/23843 | 0.172452 | 0.502855 | 0.470788 | Cry1/Kdm3   |
| GO_BP_m2GO:001571organic ani    | 11/470 | 402/23843 | 0.17291  | 0.50304  | 0.470961 | Slc6a21/Ac  |
| GO_BP_m2GO:006096regulation     | 3/470  | 73/23843  | 0.174394 | 0.50304  | 0.470961 | Bmp4/Dnd    |
| GO_BP_m2GO:190458regulation     | 3/470  | 73/23843  | 0.174394 | 0.50304  | 0.470961 | Bmp4/Ect2   |
| GO_BP_m2GO:005116nuclear exp    | 5/470  | 150/23843 | 0.175247 | 0.50304  | 0.470961 | Hnrnpa2b1   |
| GO_BP_m2GO:000749mesoderm       | 4/470  | 111/23843 | 0.176326 | 0.50304  | 0.470961 | Bmp4/Nr4a   |
| GO_BP_m2GO:007232monocarb       | 4/470  | 111/23843 | 0.176326 | 0.50304  | 0.470961 | Acat2/Echc  |
| GO_BP_m2GO:000152angiogene      | 13/470 | 492/23843 | 0.176554 | 0.50304  | 0.470961 | Angpt4/Br   |
| GO_BP_m2GO:001905viral life cyc | 6/470  | 191/23843 | 0.17676  | 0.50304  | 0.470961 | Chmp3/Ma    |
| GO_BP_m2GO:007121cellular res   | 8/470  | 275/23843 | 0.177819 | 0.50304  | 0.470961 | Aurkb/Ect2  |
| GO_BP_m2GO:010400cellular res   | 8/470  | 275/23843 | 0.177819 | 0.50304  | 0.470961 | Aurkb/Ect2  |
| GO_BP_m2GO:005076negative re    | 9/470  | 318/23843 | 0.178422 | 0.50304  | 0.470961 | Bmp4/Cit1   |
| GO_BP_m2GO:000188receptor re    | 2/470  | 39/23843  | 0.179118 | 0.50304  | 0.470961 | Caml/Vamj   |
| GO_BP_m2GO:002198pituitary gl   | 2/470  | 39/23843  | 0.179118 | 0.50304  | 0.470961 | Bmp4/Six3   |
| GO_BP_m2GO:003112developme      | 2/470  | 39/23843  | 0.179118 | 0.50304  | 0.470961 | Bmp4/Six3   |
| GO_BP_m2GO:004274hydrogen r     | 2/470  | 39/23843  | 0.179118 | 0.50304  | 0.470961 | Cybb/Pink1  |
| GO_BP_m2GO:004474protein tra    | 2/470  | 39/23843  | 0.179118 | 0.50304  | 0.470961 | Pex5l/Tomi  |
| GO_BP_m2GO:004502early endo     | 2/470  | 39/23843  | 0.179118 | 0.50304  | 0.470961 | Chmp3/Mt    |
| GO_BP_m2GO:004574positive re    | 2/470  | 39/23843  | 0.179118 | 0.50304  | 0.470961 | Lfng/Pdcd1  |
| GO_BP_m2GO:004585pH reducti     | 2/470  | 39/23843  | 0.179118 | 0.50304  | 0.470961 | Atp6v1h/G   |
| GO_BP_m2GO:000231B cell activ   | 3/470  | 74/23843  | 0.179294 | 0.50304  | 0.470961 | Itfg2/Lfng/ |
| GO_BP_m2GO:000862extrinsic a    | 3/470  | 74/23843  | 0.179294 | 0.50304  | 0.470961 | Bloc1s2/Fa  |
| GO_BP_m2GO:003250maintenan      | 3/470  | 74/23843  | 0.179294 | 0.50304  | 0.470961 | Pink1/Syne  |
| GO_BP_m2GO:000803tRNA proc      | 4/470  | 112/23843 | 0.180229 | 0.50304  | 0.470961 | Ftsj1/Nsun1 |
| GO_BP_m2GO:004247inner ear r    | 4/470  | 112/23843 | 0.180229 | 0.50304  | 0.470961 | Chd7/Col2   |
| GO_BP_m2GO:000005ribosomal l    | 1/470  | 10/23843  | 0.180556 | 0.50304  | 0.470961 | Ran         |
| GO_BP_m2GO:000209negative re    | 1/470  | 10/23843  | 0.180556 | 0.50304  | 0.470961 | Mtmr2       |
| GO_BP_m2GO:000600fructose m     | 1/470  | 10/23843  | 0.180556 | 0.50304  | 0.470961 | Pfkfb4      |
| GO_BP_m2GO:000600glucose cat    | 1/470  | 10/23843  | 0.180556 | 0.50304  | 0.470961 | Pfkfb2      |
| GO_BP_m2GO:000636tRNA splici    | 1/470  | 10/23843  | 0.180556 | 0.50304  | 0.470961 | Rtcb        |
| GO_BP_m2GO:000662posttransla    | 1/470  | 10/23843  | 0.180556 | 0.50304  | 0.470961 | Sec63       |
| GO_BP_m2GO:000930snRNA trar     | 1/470  | 10/23843  | 0.180556 | 0.50304  | 0.470961 | Ell         |
| GO_BP_m2GO:000965UV protect     | 1/470  | 10/23843  | 0.180556 | 0.50304  | 0.470961 | Mfap4       |
| GO_BP_m2GO:001091negative re    | 1/470  | 10/23843  | 0.180556 | 0.50304  | 0.470961 | Hebp2       |
| GO_BP_m2GO:001098regulation     | 1/470  | 10/23843  | 0.180556 | 0.50304  | 0.470961 | Csk         |
| GO_BP_m2GO:001480regulation     | 1/470  | 10/23843  | 0.180556 | 0.50304  | 0.470961 | Lfng        |
| GO_BP_m2GO:001581glycine trar   | 1/470  | 10/23843  | 0.180556 | 0.50304  | 0.470961 | Slc25a38    |
| GO_BP_m2GO:001820peptidyl-m     | 1/470  | 10/23843  | 0.180556 | 0.50304  | 0.470961 | Metap2      |
| GO_BP_m2GO:002155optic nerve    | 1/470  | 10/23843  | 0.180556 | 0.50304  | 0.470961 | Tmem126a    |
| GO_BP_m2GO:002202interkinetic   | 1/470  | 10/23843  | 0.180556 | 0.50304  | 0.470961 | Cep120      |
| GO_BP_m2GO:003105chromatin      | 1/470  | 10/23843  | 0.180556 | 0.50304  | 0.470961 | H3f3b       |
| GO_BP_m2GO:003246positive re    | 1/470  | 10/23843  | 0.180556 | 0.50304  | 0.470961 | Rack1       |
| GO_BP_m2GO:003295inositol tris  | 1/470  | 10/23843  | 0.180556 | 0.50304  | 0.470961 | Ptk2b       |
| GO_BP_m2GO:003308regulation     | 1/470  | 10/23843  | 0.180556 | 0.50304  | 0.470961 | Bmp4        |
| GO_BP_m2GO:003308negative re    | 1/470  | 10/23843  | 0.180556 | 0.50304  | 0.470961 | Bmp4        |
| GO_BP_m2GO:003313regulation     | 1/470  | 10/23843  | 0.180556 | 0.50304  | 0.470961 | Pfkfb2      |
| GO_BP_m2GO:003318regulation     | 1/470  | 10/23843  | 0.180556 | 0.50304  | 0.470961 | Rnf20       |
| GO_BP_m2GO:003442nuclear-tra    | 1/470  | 10/23843  | 0.180556 | 0.50304  | 0.470961 | Exosc2      |

|                                    |           |          |          |          |             |
|------------------------------------|-----------|----------|----------|----------|-------------|
| GO_BP_m2GO:003572common r1/470     | 10/23843  | 0.180556 | 0.50304  | 0.470961 | Nr4a3       |
| GO_BP_m2GO:003649PERK-med1/470     | 10/23843  | 0.180556 | 0.50304  | 0.470961 | Atf4        |
| GO_BP_m2GO:004314snoRNA pr1/470    | 10/23843  | 0.180556 | 0.50304  | 0.470961 | Exosc2      |
| GO_BP_m2GO:004392exonucleol1/470   | 10/23843  | 0.180556 | 0.50304  | 0.470961 | Exosc2      |
| GO_BP_m2GO:004605UTP metab1/470    | 10/23843  | 0.180556 | 0.50304  | 0.470961 | Cad         |
| GO_BP_m2GO:004809chromatin-1/470   | 10/23843  | 0.180556 | 0.50304  | 0.470961 | Smarcd1     |
| GO_BP_m2GO:004867negative re1/470  | 10/23843  | 0.180556 | 0.50304  | 0.470961 | Spg20       |
| GO_BP_m2GO:005112synaptic gr1/470  | 10/23843  | 0.180556 | 0.50304  | 0.470961 | Agrn        |
| GO_BP_m2GO:005145corticotrop1/470  | 10/23843  | 0.180556 | 0.50304  | 0.470961 | Pex5l       |
| GO_BP_m2GO:006051prostatic bl1/470 | 10/23843  | 0.180556 | 0.50304  | 0.470961 | Bmp4        |
| GO_BP_m2GO:006063regulation 1/470  | 10/23843  | 0.180556 | 0.50304  | 0.470961 | Eif4g3      |
| GO_BP_m2GO:006071chorio-alla1/470  | 10/23843  | 0.180556 | 0.50304  | 0.470961 | Erf         |
| GO_BP_m2GO:007024negative re1/470  | 10/23843  | 0.180556 | 0.50304  | 0.470961 | Bmp4        |
| GO_BP_m2GO:008000mRNA met1/470     | 10/23843  | 0.180556 | 0.50304  | 0.470961 | Mettl14     |
| GO_BP_m2GO:009048pyrimidine 1/470  | 10/23843  | 0.180556 | 0.50304  | 0.470961 | Slc35a4     |
| GO_BP_m2GO:009742liver regen1/470  | 10/23843  | 0.180556 | 0.50304  | 0.470961 | Sulf2       |
| GO_BP_m2GO:190003negative re1/470  | 10/23843  | 0.180556 | 0.50304  | 0.470961 | Pink1       |
| GO_BP_m2GO:190045positive re1/470  | 10/23843  | 0.180556 | 0.50304  | 0.470961 | Pink1       |
| GO_BP_m2GO:190133regulation 1/470  | 10/23843  | 0.180556 | 0.50304  | 0.470961 | Bmp4        |
| GO_BP_m2GO:200084regulation 1/470  | 10/23843  | 0.180556 | 0.50304  | 0.470961 | Cry1        |
| GO_BP_m2GO:00017Cin utero en12/470 | 450/23843 | 0.180668 | 0.50304  | 0.470961 | Cebpa/Chc   |
| GO_BP_m2GO:001645gene silenc8/470  | 277/23843 | 0.182639 | 0.508191 | 0.475784 | Bmp4/Dnd    |
| GO_BP_m2GO:002203metenceph4/470    | 113/23843 | 0.184161 | 0.511267 | 0.478663 | Coq8b/Fair  |
| GO_BP_m2GO:004654developme4/470    | 113/23843 | 0.184161 | 0.511267 | 0.478663 | Bmp4/Gdf9   |
| GO_BP_m2GO:000648protein N-3/470   | 75/23843  | 0.184232 | 0.511267 | 0.478663 | Mgat1/Serj  |
| GO_BP_m2GO:003464cellular res3/470 | 75/23843  | 0.184232 | 0.511267 | 0.478663 | Aurkb/Mfa   |
| GO_BP_m2GO:000673oxidoreduc5/470   | 153/23843 | 0.185211 | 0.512753 | 0.480054 | Coq8b/Coc   |
| GO_BP_m2GO:009017organelle r5/470  | 153/23843 | 0.185211 | 0.512753 | 0.480054 | Chmp3/Snj   |
| GO_BP_m2GO:000193negative re2/470  | 40/23843  | 0.186233 | 0.512753 | 0.480054 | Pdcd10/Ptq  |
| GO_BP_m2GO:000602glycosamin2/470   | 40/23843  | 0.186233 | 0.512753 | 0.480054 | Chst12/Chs  |
| GO_BP_m2GO:000618cGMP bios2/470    | 40/23843  | 0.186233 | 0.512753 | 0.480054 | Gucy2c/Ptk  |
| GO_BP_m2GO:000637mRNA poly2/470    | 40/23843  | 0.186233 | 0.512753 | 0.480054 | Pabpn1/Rn   |
| GO_BP_m2GO:001082regulation 2/470  | 40/23843  | 0.186233 | 0.512753 | 0.480054 | Cep120/Ch   |
| GO_BP_m2GO:003201ARF protei2/470   | 40/23843  | 0.186233 | 0.512753 | 0.480054 | Arap3/Sma   |
| GO_BP_m2GO:003201regulation 2/470  | 40/23843  | 0.186233 | 0.512753 | 0.480054 | Arap3/Sma   |
| GO_BP_m2GO:007154dopaminer2/470    | 40/23843  | 0.186233 | 0.512753 | 0.480054 | Lmx1b/Sfrp  |
| GO_BP_m2GO:008600cardiac mu2/470   | 40/23843  | 0.186233 | 0.512753 | 0.480054 | Gpd1l/Kcnl  |
| GO_BP_m2GO:009878ncRNA trar2/470   | 40/23843  | 0.186233 | 0.512753 | 0.480054 | Ell/Sirt7   |
| GO_BP_m2GO:004478cilium orga9/470  | 322/23843 | 0.187416 | 0.515669 | 0.482785 | 2700049AC   |
| GO_BP_m2GO:000648protein gly6/470  | 195/23843 | 0.188509 | 0.517658 | 0.484647 | Galnt2/Lfnq |
| GO_BP_m2GO:000689receptor-r6/470   | 195/23843 | 0.188509 | 0.517658 | 0.484647 | Ap2b1/Ara   |
| GO_BP_m2GO:004341macromole6/470    | 195/23843 | 0.188509 | 0.517658 | 0.484647 | Galnt2/Lfnq |
| GO_BP_m2GO:003133positive re7/470  | 237/23843 | 0.188858 | 0.518278 | 0.485228 | Cebpa/Csf2  |
| GO_BP_m2GO:001604cell growth13/470 | 499/23843 | 0.189086 | 0.518551 | 0.485483 | Acsl4/Auts: |
| GO_BP_m2GO:005127regulation 3/470  | 76/23843  | 0.189204 | 0.518551 | 0.485483 | Chd7/Pde4   |
| GO_BP_m2GO:002169cerebellar c2/470 | 41/23843  | 0.193388 | 0.52077  | 0.487561 | Coq8b/Fair  |
| GO_BP_m2GO:003519production2/470   | 41/23843  | 0.193388 | 0.52077  | 0.487561 | Bmp4/Hnrr   |
| GO_BP_m2GO:004218ketone bio:2/470  | 41/23843  | 0.193388 | 0.52077  | 0.487561 | Coq8b/Coc   |

|                                     |          |          |         |          |             |
|-------------------------------------|----------|----------|---------|----------|-------------|
| GO_BP_m2GO:005069regulation 2/470   | 41/23843 | 0.193388 | 0.52077 | 0.487561 | Il12rb1/Ma  |
| GO_BP_m2GO:006101positive reç2/470  | 41/23843 | 0.193388 | 0.52077 | 0.487561 | Mettl14/Zc  |
| GO_BP_m2GO:006151protein loc 2/470  | 41/23843 | 0.193388 | 0.52077 | 0.487561 | Crocc/lft12 |
| GO_BP_m2GO:009892vesicle-me 2/470   | 41/23843 | 0.193388 | 0.52077 | 0.487561 | Chmp3/Mt    |
| GO_BP_m2GO:000641translation:3/470  | 77/23843 | 0.194211 | 0.52077 | 0.487561 | 2810006K2   |
| GO_BP_m2GO:001038regulation 3/470   | 77/23843 | 0.194211 | 0.52077 | 0.487561 | Foxo4/Kcni  |
| GO_BP_m2GO:009063activation ç3/470  | 77/23843 | 0.194211 | 0.52077 | 0.487561 | Ect2/Eif5/P |
| GO_BP_m2GO:190160alpha-amir 3/470   | 77/23843 | 0.194211 | 0.52077 | 0.487561 | Hmgcl/lvd/  |
| GO_BP_m2GO:000173formation ç1/470   | 11/23843 | 0.196716 | 0.52077 | 0.487561 | Eif5        |
| GO_BP_m2GO:000211aggressive 1/470   | 11/23843 | 0.196716 | 0.52077 | 0.487561 | Penk        |
| GO_BP_m2GO:000652arginine ca 1/470  | 11/23843 | 0.196716 | 0.52077 | 0.487561 | Oat         |
| GO_BP_m2GO:000688intracellula 1/470 | 11/23843 | 0.196716 | 0.52077 | 0.487561 | Fthl17f     |
| GO_BP_m2GO:000920pyrimidine 1/470   | 11/23843 | 0.196716 | 0.52077 | 0.487561 | Cad         |
| GO_BP_m2GO:001074positive reç1/470  | 11/23843 | 0.196716 | 0.52077 | 0.487561 | Csf2        |
| GO_BP_m2GO:001487response tr1/470   | 11/23843 | 0.196716 | 0.52077 | 0.487561 | Srl         |
| GO_BP_m2GO:001618synaptic ve 1/470  | 11/23843 | 0.196716 | 0.52077 | 0.487561 | Stxbp1      |
| GO_BP_m2GO:003127regulation 1/470   | 11/23843 | 0.196716 | 0.52077 | 0.487561 | Klhl41      |
| GO_BP_m2GO:003150heterochro 1/470   | 11/23843 | 0.196716 | 0.52077 | 0.487561 | H3f3b       |
| GO_BP_m2GO:003308immature 11/470    | 11/23843 | 0.196716 | 0.52077 | 0.487561 | Bmp4        |
| GO_BP_m2GO:003332Leydig cell 1/470  | 11/23843 | 0.196716 | 0.52077 | 0.487561 | Sgpl1       |
| GO_BP_m2GO:003360positive reç1/470  | 11/23843 | 0.196716 | 0.52077 | 0.487561 | Pink1       |
| GO_BP_m2GO:003593glucocortic 1/470  | 11/23843 | 0.196716 | 0.52077 | 0.487561 | Cry1        |
| GO_BP_m2GO:004564negative re 1/470  | 11/23843 | 0.196716 | 0.52077 | 0.487561 | Mafb        |
| GO_BP_m2GO:004600negative re 1/470  | 11/23843 | 0.196716 | 0.52077 | 0.487561 | Prkar1a     |
| GO_BP_m2GO:004660positive reç1/470  | 11/23843 | 0.196716 | 0.52077 | 0.487561 | Cep120      |
| GO_BP_m2GO:004863skeletal mu 1/470  | 11/23843 | 0.196716 | 0.52077 | 0.487561 | Tll2        |
| GO_BP_m2GO:005066hydrogen ç1/470    | 11/23843 | 0.196716 | 0.52077 | 0.487561 | Cybb        |
| GO_BP_m2GO:005115negative re 1/470  | 11/23843 | 0.196716 | 0.52077 | 0.487561 | Foxo4       |
| GO_BP_m2GO:005160exocyst loc 1/470  | 11/23843 | 0.196716 | 0.52077 | 0.487561 | Ralb        |
| GO_BP_m2GO:005190positive reç1/470  | 11/23843 | 0.196716 | 0.52077 | 0.487561 | Rack1       |
| GO_BP_m2GO:006001righting ref1/470  | 11/23843 | 0.196716 | 0.52077 | 0.487561 | Auts2       |
| GO_BP_m2GO:006017limb bud fc 1/470  | 11/23843 | 0.196716 | 0.52077 | 0.487561 | Col2a1      |
| GO_BP_m2GO:006034positive reç1/470  | 11/23843 | 0.196716 | 0.52077 | 0.487561 | Mavs        |
| GO_BP_m2GO:006108positive reç1/470  | 11/23843 | 0.196716 | 0.52077 | 0.487561 | Nr4a3       |
| GO_BP_m2GO:006130cardiac nel 1/470  | 11/23843 | 0.196716 | 0.52077 | 0.487561 | Bmp4        |
| GO_BP_m2GO:007093histone H4 1/470   | 11/23843 | 0.196716 | 0.52077 | 0.487561 | Sirt7       |
| GO_BP_m2GO:007104histone mF 1/470   | 11/23843 | 0.196716 | 0.52077 | 0.487561 | Xrn1        |
| GO_BP_m2GO:007186positive reç1/470  | 11/23843 | 0.196716 | 0.52077 | 0.487561 | Shc1        |
| GO_BP_m2GO:007212regulation 1/470   | 11/23843 | 0.196716 | 0.52077 | 0.487561 | Bmp4        |
| GO_BP_m2GO:007217nephric du 1/470   | 11/23843 | 0.196716 | 0.52077 | 0.487561 | Bmp4        |
| GO_BP_m2GO:009030negative re 1/470  | 11/23843 | 0.196716 | 0.52077 | 0.487561 | Mttr2       |
| GO_BP_m2GO:009757sequesterir 1/470  | 11/23843 | 0.196716 | 0.52077 | 0.487561 | Fthl17f     |
| GO_BP_m2GO:009878pre-mRNA 1/470     | 11/23843 | 0.196716 | 0.52077 | 0.487561 | Ncbp2       |
| GO_BP_m2GO:190036regulation 1/470   | 11/23843 | 0.196716 | 0.52077 | 0.487561 | Rnf20       |
| GO_BP_m2GO:190320regulation 1/470   | 11/23843 | 0.196716 | 0.52077 | 0.487561 | Pfkfb2      |
| GO_BP_m2GO:190358regulation 1/470   | 11/23843 | 0.196716 | 0.52077 | 0.487561 | Pdcd10      |
| GO_BP_m2GO:190365positive reç1/470  | 11/23843 | 0.196716 | 0.52077 | 0.487561 | Mttr2       |
| GO_BP_m2GO:190415regulation 1/470   | 11/23843 | 0.196716 | 0.52077 | 0.487561 | Ube2j1      |



|                                     |           |          |          |          |             |
|-------------------------------------|-----------|----------|----------|----------|-------------|
| GO_BP_m2GO:200003regulation 1/470   | 11/23843  | 0.196716 | 0.52077  | 0.487561 | Sfrp2       |
| GO_BP_m2GO:200032regulation 1/470   | 11/23843  | 0.196716 | 0.52077  | 0.487561 | Cry1        |
| GO_BP_m2GO:200078positive reç1/470  | 11/23843  | 0.196716 | 0.52077  | 0.487561 | Ralb        |
| GO_BP_m2GO:009015establishmı6/470   | 198/23843 | 0.197513 | 0.522551 | 0.489228 | Csk/Rack1/  |
| GO_BP_m2GO:000859regulation 3/470   | 78/23843  | 0.19925  | 0.525355 | 0.491853 | Arrdc1/Lfnı |
| GO_BP_m2GO:006007excitatory rı3/470 | 78/23843  | 0.19925  | 0.525355 | 0.491853 | Mtmr2/Ptk   |
| GO_BP_m2GO:006041cardiac sep3/470   | 78/23843  | 0.19925  | 0.525355 | 0.491853 | Bmp4/Chd    |
| GO_BP_m2GO:004873gland deve12/470   | 460/23843 | 0.199811 | 0.525355 | 0.491853 | Bmp4/Ceb    |
| GO_BP_m2GO:001715calcium ior4/470   | 117/23843 | 0.200161 | 0.525355 | 0.491853 | Cplx4/Stxb  |
| GO_BP_m2GO:000038regulation 2/470   | 42/23843  | 0.200577 | 0.525355 | 0.491853 | Dyrk1a/Thr  |
| GO_BP_m2GO:001607snRNA met2/470     | 42/23843  | 0.200577 | 0.525355 | 0.491853 | Ell/Exosc2  |
| GO_BP_m2GO:003105dsRNA fraç2/470    | 42/23843  | 0.200577 | 0.525355 | 0.491853 | Bmp4/Hnrr   |
| GO_BP_m2GO:003419cellular resı2/470 | 42/23843  | 0.200577 | 0.525355 | 0.491853 | Atf4/Irfg2  |
| GO_BP_m2GO:004001positive reç2/470  | 42/23843  | 0.200577 | 0.525355 | 0.491853 | Chd7/Ppib   |
| GO_BP_m2GO:004207intraciliary 2/470 | 42/23843  | 0.200577 | 0.525355 | 0.491853 | Ift122/Ttc3 |
| GO_BP_m2GO:004230positive reç2/470  | 42/23843  | 0.200577 | 0.525355 | 0.491853 | Ect2/Mavs   |
| GO_BP_m2GO:004348RNA stabili2/470   | 42/23843  | 0.200577 | 0.525355 | 0.491853 | Elavl1/Thra |
| GO_BP_m2GO:004363RNA polyaı2/470    | 42/23843  | 0.200577 | 0.525355 | 0.491853 | Pabpn1/Rn   |
| GO_BP_m2GO:007091production2/470    | 42/23843  | 0.200577 | 0.525355 | 0.491853 | Bmp4/Hnrr   |
| GO_BP_m2GO:009031regulation 2/470   | 42/23843  | 0.200577 | 0.525355 | 0.491853 | Dyrk1a/Pin  |
| GO_BP_m2GO:003238regulation 11/470  | 417/23843 | 0.203002 | 0.531377 | 0.497491 | Bmp4/Chr    |
| GO_BP_m2GO:000627regulation 4/470   | 118/23843 | 0.204225 | 0.533496 | 0.499475 | Bmp4/Csf2   |
| GO_BP_m2GO:001699antibiotic n4/470  | 118/23843 | 0.204225 | 0.533496 | 0.499475 | Aco1/Cybt   |
| GO_BP_m2GO:006004cardiac mu4/470    | 118/23843 | 0.204225 | 0.533496 | 0.499475 | Agrn/Gpd1   |
| GO_BP_m2GO:004852positive reç3/470  | 79/23843  | 0.20432  | 0.533496 | 0.499475 | Chmp3/Pp    |
| GO_BP_m2GO:004677protein aut7/470   | 243/23843 | 0.205234 | 0.535029 | 0.50091  | Cad/Clk1/C  |
| GO_BP_m2GO:007138cellular resı6/470 | 201/23843 | 0.206675 | 0.535029 | 0.50091  | Bmp4/Cry1   |
| GO_BP_m2GO:000156branching 2/470    | 43/23843  | 0.207796 | 0.535029 | 0.50091  | Fkbp1/Sfrp2 |
| GO_BP_m2GO:000328regulation 2/470   | 43/23843  | 0.207796 | 0.535029 | 0.50091  | Rack1/Gpd   |
| GO_BP_m2GO:000604amino sugı2/470    | 43/23843  | 0.207796 | 0.535029 | 0.50091  | Chst5/Mga   |
| GO_BP_m2GO:008601membrane 2/470     | 43/23843  | 0.207796 | 0.535029 | 0.50091  | Kcnh2/Tpci  |
| GO_BP_m2GO:003033negative re7/470   | 244/23843 | 0.208015 | 0.535029 | 0.50091  | Angpt4/Arı  |
| GO_BP_m2GO:000703Golgi orgaı4/470   | 119/23843 | 0.208313 | 0.535029 | 0.50091  | Cit/Pdcd10  |
| GO_BP_m2GO:000820cholesterol4/470   | 119/23843 | 0.208313 | 0.535029 | 0.50091  | Aplp2/Ceb   |
| GO_BP_m2GO:000227myeloid ce 3/470   | 80/23843  | 0.20942  | 0.535029 | 0.50091  | Nr4a3/Racı  |
| GO_BP_m2GO:004883inner ear d 6/470  | 202/23843 | 0.209762 | 0.535029 | 0.50091  | Bmp4/Ceb    |
| GO_BP_m2GO:006004heart contr6/470   | 202/23843 | 0.209762 | 0.535029 | 0.50091  | Agrn/Gpd1   |
| GO_BP_m2GO:004269muscle cell10/470  | 376/23843 | 0.210355 | 0.535029 | 0.50091  | Asf1a/Bmp   |
| GO_BP_m2GO:003313positive reç4/470  | 120/23843 | 0.212425 | 0.535029 | 0.50091  | Ifna4/Pdcd  |
| GO_BP_m2GO:000039RNA splicir 1/470  | 12/23843  | 0.212558 | 0.535029 | 0.50091  | Rtcb        |
| GO_BP_m2GO:000312heart field :1/470 | 12/23843  | 0.212558 | 0.535029 | 0.50091  | Bmp4        |
| GO_BP_m2GO:000333mesenchyr 1/470    | 12/23843  | 0.212558 | 0.535029 | 0.50091  | Bmp4        |
| GO_BP_m2GO:000604UDP-N-acı1/470     | 12/23843  | 0.212558 | 0.535029 | 0.50091  | Mgat1       |
| GO_BP_m2GO:000607glycerol-3-ı1/470  | 12/23843  | 0.212558 | 0.535029 | 0.50091  | Gpd1ı       |
| GO_BP_m2GO:000911vitamin cat 1/470  | 12/23843  | 0.212558 | 0.535029 | 0.50091  | Pm20d2      |
| GO_BP_m2GO:000920pyrimidine 1/470   | 12/23843  | 0.212558 | 0.535029 | 0.50091  | Cad         |
| GO_BP_m2GO:001031regulation 1/470   | 12/23843  | 0.212558 | 0.535029 | 0.50091  | Pink1       |
| GO_BP_m2GO:001045centriole-c 1/470  | 12/23843  | 0.212558 | 0.535029 | 0.50091  | Crocc       |

|                                     |           |          |          |          |             |
|-------------------------------------|-----------|----------|----------|----------|-------------|
| GO_BP_m2GO:001575nucleotide:1/470   | 12/23843  | 0.212558 | 0.535029 | 0.50091  | Slc35a4     |
| GO_BP_m2GO:001655protein imr1/470   | 12/23843  | 0.212558 | 0.535029 | 0.50091  | Pex5l       |
| GO_BP_m2GO:001993cGMP-mec1/470      | 12/23843  | 0.212558 | 0.535029 | 0.50091  | Ptk2b       |
| GO_BP_m2GO:003029intestinal cl1/470 | 12/23843  | 0.212558 | 0.535029 | 0.50091  | Acat2       |
| GO_BP_m2GO:003112rRNA 3'-er1/470    | 12/23843  | 0.212558 | 0.535029 | 0.50091  | Exosc2      |
| GO_BP_m2GO:003282positive re1/470   | 12/23843  | 0.212558 | 0.535029 | 0.50091  | Zbtb1       |
| GO_BP_m2GO:003308regulation 1/470   | 12/23843  | 0.212558 | 0.535029 | 0.50091  | Bmp4        |
| GO_BP_m2GO:003352histone H2 1/470   | 12/23843  | 0.212558 | 0.535029 | 0.50091  | Rnf20       |
| GO_BP_m2GO:003362regulation 1/470   | 12/23843  | 0.212558 | 0.535029 | 0.50091  | Farp2       |
| GO_BP_m2GO:003597peptidyl-th1/470   | 12/23843  | 0.212558 | 0.535029 | 0.50091  | Pdp1        |
| GO_BP_m2GO:004275long-chain1/470    | 12/23843  | 0.212558 | 0.535029 | 0.50091  | Fads1       |
| GO_BP_m2GO:004298sequesterir1/470   | 12/23843  | 0.212558 | 0.535029 | 0.50091  | Twf1        |
| GO_BP_m2GO:004365engulfmen1/470     | 12/23843  | 0.212558 | 0.535029 | 0.50091  | Rac2        |
| GO_BP_m2GO:004409positive re1/470   | 12/23843  | 0.212558 | 0.535029 | 0.50091  | Ralb        |
| GO_BP_m2GO:005198regulation 1/470   | 12/23843  | 0.212558 | 0.535029 | 0.50091  | Ect2        |
| GO_BP_m2GO:006012positive re1/470   | 12/23843  | 0.212558 | 0.535029 | 0.50091  | Serp1       |
| GO_BP_m2GO:006043bronchus c1/470    | 12/23843  | 0.212558 | 0.535029 | 0.50091  | Bmp4        |
| GO_BP_m2GO:006043trachea mc1/470    | 12/23843  | 0.212558 | 0.535029 | 0.50091  | Bmp4        |
| GO_BP_m2GO:006050epithelial c1/470  | 12/23843  | 0.212558 | 0.535029 | 0.50091  | Bmp4        |
| GO_BP_m2GO:006117negative re1/470   | 12/23843  | 0.212558 | 0.535029 | 0.50091  | Ucp2        |
| GO_BP_m2GO:006146regulation 1/470   | 12/23843  | 0.212558 | 0.535029 | 0.50091  | Nr4a3       |
| GO_BP_m2GO:007093histone H3 1/470   | 12/23843  | 0.212558 | 0.535029 | 0.50091  | Sirt7       |
| GO_BP_m2GO:007134skeletal mu1/470   | 12/23843  | 0.212558 | 0.535029 | 0.50091  | Agri        |
| GO_BP_m2GO:007183cell prolifer1/470 | 12/23843  | 0.212558 | 0.535029 | 0.50091  | Shc1        |
| GO_BP_m2GO:007186regulation 1/470   | 12/23843  | 0.212558 | 0.535029 | 0.50091  | Shc1        |
| GO_BP_m2GO:007204collecting c1/470  | 12/23843  | 0.212558 | 0.535029 | 0.50091  | Bmp4        |
| GO_BP_m2GO:007211glomerular1/470    | 12/23843  | 0.212558 | 0.535029 | 0.50091  | Bmp4        |
| GO_BP_m2GO:007217nephric du1/470    | 12/23843  | 0.212558 | 0.535029 | 0.50091  | Bmp4        |
| GO_BP_m2GO:008601membrane1/470      | 12/23843  | 0.212558 | 0.535029 | 0.50091  | Kcni2       |
| GO_BP_m2GO:009023regulation 1/470   | 12/23843  | 0.212558 | 0.535029 | 0.50091  | Auts2       |
| GO_BP_m2GO:009896neurotrans1/470    | 12/23843  | 0.212558 | 0.535029 | 0.50091  | Rab11a      |
| GO_BP_m2GO:190129regulation 1/470   | 12/23843  | 0.212558 | 0.535029 | 0.50091  | Pink1       |
| GO_BP_m2GO:190257protein loc1/470   | 12/23843  | 0.212558 | 0.535029 | 0.50091  | Ran         |
| GO_BP_m2GO:190290negative re1/470   | 12/23843  | 0.212558 | 0.535029 | 0.50091  | Pink1       |
| GO_BP_m2GO:190354establishm1/470    | 12/23843  | 0.212558 | 0.535029 | 0.50091  | Rab11a      |
| GO_BP_m2GO:190429negative re1/470   | 12/23843  | 0.212558 | 0.535029 | 0.50091  | Ube2j1      |
| GO_BP_m2GO:190447regulation 1/470   | 12/23843  | 0.212558 | 0.535029 | 0.50091  | Acat2       |
| GO_BP_m2GO:003090hindbrain c5/470   | 161/23843 | 0.212735 | 0.535154 | 0.501027 | Coq8b/Fair  |
| GO_BP_m2GO:000801blood circu12/470  | 467/23843 | 0.213731 | 0.536817 | 0.502585 | Agri/Chd7   |
| GO_BP_m2GO:000328ventricular 3/470  | 81/23843  | 0.214548 | 0.536817 | 0.502585 | Ap2b1/Bm    |
| GO_BP_m2GO:000647protein de3/470    | 81/23843  | 0.214548 | 0.536817 | 0.502585 | Dyrk1a/Pin  |
| GO_BP_m2GO:000721glutamate 3/470    | 81/23843  | 0.214548 | 0.536817 | 0.502585 | Grm7/Pink   |
| GO_BP_m2GO:001590fatty acid tr3/470 | 81/23843  | 0.214548 | 0.536817 | 0.502585 | Acsl4/Erfe/ |
| GO_BP_m2GO:001921regulation 3/470   | 81/23843  | 0.214548 | 0.536817 | 0.502585 | Acsl4/Erfe/ |
| GO_BP_m2GO:004866neuron fat3/470    | 81/23843  | 0.214548 | 0.536817 | 0.502585 | Bmp4/Id2/   |
| GO_BP_m2GO:007016regulation 3/470   | 81/23843  | 0.214548 | 0.536817 | 0.502585 | Bmp4/Nbr:   |
| GO_BP_m2GO:009758lamellipodi3/470   | 81/23843  | 0.214548 | 0.536817 | 0.502585 | Auts2/Rac2  |
| GO_BP_m2GO:000690vesicle doc2/470   | 44/23843  | 0.215042 | 0.537093 | 0.502843 | Ralb/Stxbp  |

|                                     |           |          |          |          |             |
|-------------------------------------|-----------|----------|----------|----------|-------------|
| GO_BP_m2GO:003285positive reg2/470  | 44/23843  | 0.215042 | 0.537093 | 0.502843 | Erfe/Stxbp1 |
| GO_BP_m2GO:004845synaptic ve2/470   | 44/23843  | 0.215042 | 0.537093 | 0.502843 | Sh3gl1/Syt  |
| GO_BP_m2GO:004340regulation 8/470   | 290/23843 | 0.215281 | 0.53737  | 0.503102 | Bmp4/Csk/   |
| GO_BP_m2GO:200123regulation 5/470   | 162/23843 | 0.216265 | 0.538637 | 0.504288 | Bmp4/Col2   |
| GO_BP_m2GO:001598energy der7/470    | 247/23843 | 0.216442 | 0.538637 | 0.504288 | Aco1/Adsl/  |
| GO_BP_m2GO:004566negative re7/470   | 247/23843 | 0.216442 | 0.538637 | 0.504288 | Cit/Id2/Noi |
| GO_BP_m2GO:000327cardiac sep4/470   | 121/23843 | 0.216559 | 0.538637 | 0.504288 | Ap2b1/Bm    |
| GO_BP_m2GO:004845synaptic ve4/470   | 121/23843 | 0.216559 | 0.538637 | 0.504288 | Bloc1s2/Cp  |
| GO_BP_m2GO:009748establishm4/470    | 121/23843 | 0.216559 | 0.538637 | 0.504288 | Bloc1s2/Cp  |
| GO_BP_m2GO:001470striated m11/470   | 424/23843 | 0.217779 | 0.541282 | 0.506765 | Bmp4/Chd    |
| GO_BP_m2GO:007200renal syste18/470  | 291/23843 | 0.21788  | 0.541282 | 0.506765 | Bmp4/Id2/   |
| GO_BP_m2GO:000301heart proc6/470    | 205/23843 | 0.21912  | 0.54404  | 0.509347 | Agrn/Gpd1   |
| GO_BP_m2GO:003294negative re3/470   | 82/23843  | 0.219702 | 0.54484  | 0.510096 | Bmp4/Prka   |
| GO_BP_m2GO:005067negative re3/470   | 82/23843  | 0.219702 | 0.54484  | 0.510096 | Bmp4/Prka   |
| GO_BP_m2GO:004002regulation 8/470   | 292/23843 | 0.220491 | 0.545332 | 0.510556 | Bmp4/Dnd    |
| GO_BP_m2GO:000916nucleotide 4/470   | 122/23843 | 0.220715 | 0.545332 | 0.510556 | Rack1/Pde   |
| GO_BP_m2GO:000301circulatory 12/470 | 471/23843 | 0.221867 | 0.545332 | 0.510556 | Agrn/Chd7   |
| GO_BP_m2GO:003526multicellula6/470  | 206/23843 | 0.22227  | 0.545332 | 0.510556 | Chd7/H3f3   |
| GO_BP_m2GO:000863intrinsic ap2/470  | 45/23843  | 0.222311 | 0.545332 | 0.510556 | Pdcd10/Pir  |
| GO_BP_m2GO:003271negative re2/470   | 45/23843  | 0.222311 | 0.545332 | 0.510556 | Csk/Syt11   |
| GO_BP_m2GO:004801vascular en2/470   | 45/23843  | 0.222311 | 0.545332 | 0.510556 | Bmp4/Ptk2   |
| GO_BP_m2GO:005079activated T2/470   | 45/23843  | 0.222311 | 0.545332 | 0.510556 | Il12rb1/Prk |
| GO_BP_m2GO:005195regulation 2/470   | 45/23843  | 0.222311 | 0.545332 | 0.510556 | Grm7/Stxb   |
| GO_BP_m2GO:006041ventricular 2/470  | 45/23843  | 0.222311 | 0.545332 | 0.510556 | Bmp4/Id2    |
| GO_BP_m2GO:009032regulation 2/470   | 45/23843  | 0.222311 | 0.545332 | 0.510556 | Bmp4/Wdr    |
| GO_BP_m2GO:190044regulation 2/470   | 45/23843  | 0.222311 | 0.545332 | 0.510556 | Pink1/Ptk2l |
| GO_BP_m2GO:190179negative re2/470   | 45/23843  | 0.222311 | 0.545332 | 0.510556 | Alad/Ube2   |
| GO_BP_m2GO:005086regulation 8/470   | 293/23843 | 0.223114 | 0.545332 | 0.510556 | Bmp4/Csk/   |
| GO_BP_m2GO:003530regulation 5/470   | 164/23843 | 0.223379 | 0.545332 | 0.510556 | Elfn2/Ell/M |
| GO_BP_m2GO:004212regulation 5/470   | 164/23843 | 0.223379 | 0.545332 | 0.510556 | Bmp4/Il12r  |
| GO_BP_m2GO:003220telomere o4/470    | 123/23843 | 0.224892 | 0.545332 | 0.510556 | Aurkb/H3f   |
| GO_BP_m2GO:007008glycosylatic6/470  | 207/23843 | 0.225436 | 0.545332 | 0.510556 | Galnt2/Lfn  |
| GO_BP_m2GO:000092septin ring 1/470  | 13/23843  | 0.228088 | 0.545332 | 0.510556 | 9-Sep       |
| GO_BP_m2GO:000255mast cell cl1/470  | 13/23843  | 0.228088 | 0.545332 | 0.510556 | Rac2        |
| GO_BP_m2GO:000317pulmonary 1/470    | 13/23843  | 0.228088 | 0.545332 | 0.510556 | Bmp4        |
| GO_BP_m2GO:000318pulmonary 1/470    | 13/23843  | 0.228088 | 0.545332 | 0.510556 | Bmp4        |
| GO_BP_m2GO:000641translation:1/470  | 13/23843  | 0.228088 | 0.545332 | 0.510556 | 2810006K2   |
| GO_BP_m2GO:000651protein dec1/470   | 13/23843  | 0.228088 | 0.545332 | 0.510556 | Man2c1      |
| GO_BP_m2GO:000661SRP-deper1/470     | 13/23843  | 0.228088 | 0.545332 | 0.510556 | Sec63       |
| GO_BP_m2GO:000750mesoderm 1/470     | 13/23843  | 0.228088 | 0.545332 | 0.510556 | Sfrp2       |
| GO_BP_m2GO:000761short-term 1/470   | 13/23843  | 0.228088 | 0.545332 | 0.510556 | Grm7        |
| GO_BP_m2GO:000829intracellula 1/470 | 13/23843  | 0.228088 | 0.545332 | 0.510556 | Exosc2      |
| GO_BP_m2GO:001932pentose m1/470     | 13/23843  | 0.228088 | 0.545332 | 0.510556 | Xylb        |
| GO_BP_m2GO:003111negative re1/470   | 13/23843  | 0.228088 | 0.545332 | 0.510556 | Dyrk1a      |
| GO_BP_m2GO:003126pseudopoc1/470     | 13/23843  | 0.228088 | 0.545332 | 0.510556 | Klhl41      |
| GO_BP_m2GO:003230regulation 1/470   | 13/23843  | 0.228088 | 0.545332 | 0.510556 | Acsl4       |
| GO_BP_m2GO:003307immature 11/470    | 13/23843  | 0.228088 | 0.545332 | 0.510556 | Bmp4        |
| GO_BP_m2GO:003572intraciliary 1/470 | 13/23843  | 0.228088 | 0.545332 | 0.510556 | Ift122      |

|                   |              |        |           |          |          |          |              |
|-------------------|--------------|--------|-----------|----------|----------|----------|--------------|
| GO_BP_m2GO:004226 | regulation   | 1/470  | 13/23843  | 0.228088 | 0.545332 | 0.510556 | Csf2         |
| GO_BP_m2GO:004253 | negative re  | 1/470  | 13/23843  | 0.228088 | 0.545332 | 0.510556 | Suz12        |
| GO_BP_m2GO:004253 | positive re  | 1/470  | 13/23843  | 0.228088 | 0.545332 | 0.510556 | Cybb         |
| GO_BP_m2GO:004297 | activation   | 1/470  | 13/23843  | 0.228088 | 0.545332 | 0.510556 | Ptk2b        |
| GO_BP_m2GO:004311 | positive re  | 1/470  | 13/23843  | 0.228088 | 0.545332 | 0.510556 | Fgfbp3       |
| GO_BP_m2GO:004350 | negative re  | 1/470  | 13/23843  | 0.228088 | 0.545332 | 0.510556 | Sfrp2        |
| GO_BP_m2GO:004565 | positive re  | 1/470  | 13/23843  | 0.228088 | 0.545332 | 0.510556 | Id2          |
| GO_BP_m2GO:004583 | negative re  | 1/470  | 13/23843  | 0.228088 | 0.545332 | 0.510556 | Hebp2        |
| GO_BP_m2GO:004603 | AMP metal    | 1/470  | 13/23843  | 0.228088 | 0.545332 | 0.510556 | Adsl         |
| GO_BP_m2GO:004647 | glycosphin   | 1/470  | 13/23843  | 0.228088 | 0.545332 | 0.510556 | Gba2         |
| GO_BP_m2GO:004801 | hepatocyte   | 1/470  | 13/23843  | 0.228088 | 0.545332 | 0.510556 | Muc20        |
| GO_BP_m2GO:005157 | negative re  | 1/470  | 13/23843  | 0.228088 | 0.545332 | 0.510556 | Kdm3a        |
| GO_BP_m2GO:005264 | alditol pho  | 1/470  | 13/23843  | 0.228088 | 0.545332 | 0.510556 | Gpd1l        |
| GO_BP_m2GO:005511 | relaxation   | 1/470  | 13/23843  | 0.228088 | 0.545332 | 0.510556 | Pde4d        |
| GO_BP_m2GO:006026 | regulation   | 1/470  | 13/23843  | 0.228088 | 0.545332 | 0.510556 | Rac2         |
| GO_BP_m2GO:006060 | lateral spr  | 1/470  | 13/23843  | 0.228088 | 0.545332 | 0.510556 | Bmp4         |
| GO_BP_m2GO:006115 | 3'-UTR-m     | 1/470  | 13/23843  | 0.228088 | 0.545332 | 0.510556 | Zc3h12d      |
| GO_BP_m2GO:007143 | potassium    | 1/470  | 13/23843  | 0.228088 | 0.545332 | 0.510556 | Kcnh2        |
| GO_BP_m2GO:009701 | cellular res | 1/470  | 13/23843  | 0.228088 | 0.545332 | 0.510556 | Csf2         |
| GO_BP_m2GO:009878 | mRNA clea    | 1/470  | 13/23843  | 0.228088 | 0.545332 | 0.510556 | Ncbp2        |
| GO_BP_m2GO:009887 | neurotrans   | 1/470  | 13/23843  | 0.228088 | 0.545332 | 0.510556 | Rab11a       |
| GO_BP_m2GO:009959 | neurotrans   | 1/470  | 13/23843  | 0.228088 | 0.545332 | 0.510556 | Ap2b1        |
| GO_BP_m2GO:190114 | insulin met  | 1/470  | 13/23843  | 0.228088 | 0.545332 | 0.510556 | Pcsk2        |
| GO_BP_m2GO:190285 | positive re  | 1/470  | 13/23843  | 0.228088 | 0.545332 | 0.510556 | 9-Sep        |
| GO_BP_m2GO:190418 | positive re  | 1/470  | 13/23843  | 0.228088 | 0.545332 | 0.510556 | Rack1        |
| GO_BP_m2GO:190492 | positive re  | 1/470  | 13/23843  | 0.228088 | 0.545332 | 0.510556 | Pink1        |
| GO_BP_m2GO:200009 | regulation   | 1/470  | 13/23843  | 0.228088 | 0.545332 | 0.510556 | Sfrp2        |
| GO_BP_m2GO:200010 | positive re  | 1/470  | 13/23843  | 0.228088 | 0.545332 | 0.510556 | Bmp4         |
| GO_BP_m2GO:200065 | negative re  | 1/470  | 13/23843  | 0.228088 | 0.545332 | 0.510556 | Agrn         |
| GO_BP_m2GO:004477 | cell cycle p | 10/470 | 384/23843 | 0.228559 | 0.54575  | 0.510948 | Cit/Cks1b/l  |
| GO_BP_m2GO:004483 | cell cycle G | 4/470  | 124/23843 | 0.229089 | 0.54575  | 0.510948 | Cit/Foxo4/l  |
| GO_BP_m2GO:190265 | secondary    | 4/470  | 124/23843 | 0.229089 | 0.54575  | 0.510948 | Ap1p2/Ceb    |
| GO_BP_m2GO:000209 | regulation   | 2/470  | 46/23843  | 0.229599 | 0.54575  | 0.510948 | Mtmr2/Sel    |
| GO_BP_m2GO:000703 | endosome     | 2/470  | 46/23843  | 0.229599 | 0.54575  | 0.510948 | Rab11a/Tr    |
| GO_BP_m2GO:001071 | regulation   | 2/470  | 46/23843  | 0.229599 | 0.54575  | 0.510948 | Bmp4/Mfaj    |
| GO_BP_m2GO:002260 | ovulation c  | 2/470  | 46/23843  | 0.229599 | 0.54575  | 0.510948 | Gdf9/Sgpl1   |
| GO_BP_m2GO:003503 | sperm-egc    | 2/470  | 46/23843  | 0.229599 | 0.54575  | 0.510948 | Izumo1r/Zt   |
| GO_BP_m2GO:003513 | forelimb m   | 2/470  | 46/23843  | 0.229599 | 0.54575  | 0.510948 | Ift122/Sall3 |
| GO_BP_m2GO:004859 | oocyte dev   | 2/470  | 46/23843  | 0.229599 | 0.54575  | 0.510948 | Gdf9/Ptk2k   |
| GO_BP_m2GO:001066 | regulation   | 3/470  | 84/23843  | 0.230084 | 0.54575  | 0.510948 | Pde1a/Ptk2   |
| GO_BP_m2GO:004227 | ribosomal l  | 3/470  | 84/23843  | 0.230084 | 0.54575  | 0.510948 | Fastkd2/Mi   |
| GO_BP_m2GO:005080 | negative re  | 3/470  | 84/23843  | 0.230084 | 0.54575  | 0.510948 | Mtmr2/Ptk    |
| GO_BP_m2GO:007209 | regulation   | 3/470  | 84/23843  | 0.230084 | 0.54575  | 0.510948 | Bmp4/Six3    |
| GO_BP_m2GO:200024 | regulation   | 5/470  | 166/23843 | 0.230562 | 0.546575 | 0.51172  | Bmp4/Eif4g   |
| GO_BP_m2GO:009881 | nuclear chr  | 7/470  | 252/23843 | 0.230754 | 0.546722 | 0.511857 | Aurkb/Cit/l  |
| GO_BP_m2GO:000257 | myeloid let  | 6/470  | 209/23843 | 0.23181  | 0.548604 | 0.51362  | Bmp4/Ceb     |
| GO_BP_m2GO:000840 | gonad dev    | 6/470  | 209/23843 | 0.23181  | 0.548604 | 0.51362  | Bmp4/Gdf9    |
| GO_BP_m2GO:000165 | eye develo   | 10/470 | 386/23843 | 0.233203 | 0.551279 | 0.516124 | Bmp4/Chd     |

|                                    |           |          |          |          |              |
|------------------------------------|-----------|----------|----------|----------|--------------|
| GO_BP_m2GO:003009lymphocyte10/470  | 386/23843 | 0.233203 | 0.551279 | 0.516124 | Bmp4/Chd     |
| GO_BP_m2GO:003238positive re3/470  | 253/23843 | 0.233655 | 0.551859 | 0.516667 | Ect2/Mavs/   |
| GO_BP_m2GO:000801regulation 5/470  | 167/23843 | 0.234179 | 0.551859 | 0.516667 | Agrn/Gpd1    |
| GO_BP_m2GO:000974response tr5/470  | 167/23843 | 0.234179 | 0.551859 | 0.516667 | Glul/Rack1.  |
| GO_BP_m2GO:003440nucleobase5/470   | 167/23843 | 0.234179 | 0.551859 | 0.516667 | Cad/Rack1.   |
| GO_BP_m2GO:003007insulin secr6/470 | 210/23843 | 0.235019 | 0.551859 | 0.516667 | Cyb5r4/Glu   |
| GO_BP_m2GO:001607synaptic ve3/470  | 85/23843  | 0.235309 | 0.551859 | 0.516667 | Cplx4/Stxb   |
| GO_BP_m2GO:002195central ner3/470  | 85/23843  | 0.235309 | 0.551859 | 0.516667 | Gba2/Lmx1    |
| GO_BP_m2GO:004277signal trans3/470 | 85/23843  | 0.235309 | 0.551859 | 0.516667 | Cdc5l/Dyrk   |
| GO_BP_m2GO:004350regulation 3/470  | 85/23843  | 0.235309 | 0.551859 | 0.516667 | Nr4a3/Srl/   |
| GO_BP_m2GO:007066negative re3/470  | 85/23843  | 0.235309 | 0.551859 | 0.516667 | Bmp4/Prka    |
| GO_BP_m2GO:007190positive re3/470  | 298/23843 | 0.236398 | 0.551859 | 0.516667 | Bmp4/Cks1    |
| GO_BP_m2GO:000636transcriptic2/470 | 47/23843  | 0.236902 | 0.551859 | 0.516667 | Ell/Eloa     |
| GO_BP_m2GO:001657histone ubi2/470  | 47/23843  | 0.236902 | 0.551859 | 0.516667 | Rnf20/Suz1   |
| GO_BP_m2GO:002153neural tube2/470  | 47/23843  | 0.236902 | 0.551859 | 0.516667 | Bmp4/Ift12   |
| GO_BP_m2GO:003233regulation 2/470  | 47/23843  | 0.236902 | 0.551859 | 0.516667 | Bmp4/Gdf6    |
| GO_BP_m2GO:004521sarcomere 2/470   | 47/23843  | 0.236902 | 0.551859 | 0.516667 | Klhl41/Prka  |
| GO_BP_m2GO:004562negative re2/470  | 47/23843  | 0.236902 | 0.551859 | 0.516667 | Bmp4/Id2     |
| GO_BP_m2GO:004564regulation 2/470  | 47/23843  | 0.236902 | 0.551859 | 0.516667 | Id2/Mafb     |
| GO_BP_m2GO:004871regulation 2/470  | 47/23843  | 0.236902 | 0.551859 | 0.516667 | Bmp4/Id2     |
| GO_BP_m2GO:005197regulation 2/470  | 47/23843  | 0.236902 | 0.551859 | 0.516667 | Aurkb/Hnri   |
| GO_BP_m2GO:009960regulation 2/470  | 47/23843  | 0.236902 | 0.551859 | 0.516667 | Pink1/Ptk2l  |
| GO_BP_m2GO:190459positive re2/470  | 47/23843  | 0.236902 | 0.551859 | 0.516667 | Ect2/Mavs    |
| GO_BP_m2GO:003017positive re4/470  | 126/23843 | 0.237541 | 0.551859 | 0.516667 | Bambi/Rnf1   |
| GO_BP_m2GO:200125positive re5/470  | 168/23843 | 0.237811 | 0.551859 | 0.516667 | Aurkb/Auts   |
| GO_BP_m2GO:000931response tr10/470 | 388/23843 | 0.237882 | 0.551859 | 0.516667 | Aurkb/Cry1   |
| GO_BP_m2GO:009028regulation 7/470  | 255/23843 | 0.239492 | 0.551859 | 0.516667 | Bambi/Bmq    |
| GO_BP_m2GO:003134positive re11/470 | 434/23843 | 0.239623 | 0.551859 | 0.516667 | Agrn/Auts2   |
| GO_BP_m2GO:003591skeletal mu3/470  | 86/23843  | 0.240554 | 0.551859 | 0.516667 | Klhl41/Vax1  |
| GO_BP_m2GO:005128protein hor3/470  | 86/23843  | 0.240554 | 0.551859 | 0.516667 | Acaca/Pcbp   |
| GO_BP_m2GO:000226myeloid ce5/470   | 169/23843 | 0.241459 | 0.551859 | 0.516667 | Bmp4/Id2/    |
| GO_BP_m2GO:009030nucleic acic4/470 | 127/23843 | 0.241795 | 0.551859 | 0.516667 | Exosc2/Nct   |
| GO_BP_m2GO:000236leukocyte 7/470   | 256/23843 | 0.242428 | 0.551859 | 0.516667 | Ifna4/Irfg2/ |
| GO_BP_m2GO:000167acrosome 1/470    | 14/23843  | 0.243313 | 0.551859 | 0.516667 | Zpbp         |
| GO_BP_m2GO:000315morphoge1/470     | 14/23843  | 0.243313 | 0.551859 | 0.516667 | Bmp4         |
| GO_BP_m2GO:000604N-acetylgli1/470  | 14/23843  | 0.243313 | 0.551859 | 0.516667 | Chst5        |
| GO_BP_m2GO:000717negative re1/470  | 14/23843  | 0.243313 | 0.551859 | 0.516667 | Tsg101       |
| GO_BP_m2GO:000914pyrimidine 1/470  | 14/23843  | 0.243313 | 0.551859 | 0.516667 | Cad          |
| GO_BP_m2GO:001404positive re1/470  | 14/23843  | 0.243313 | 0.551859 | 0.516667 | Stxbp1       |
| GO_BP_m2GO:001483gastro-inte1/470  | 14/23843  | 0.243313 | 0.551859 | 0.516667 | Sulf2        |
| GO_BP_m2GO:001607snoRNA m1/470     | 14/23843  | 0.243313 | 0.551859 | 0.516667 | Exosc2       |
| GO_BP_m2GO:001632neuron ren1/470   | 14/23843  | 0.243313 | 0.551859 | 0.516667 | Farp2        |
| GO_BP_m2GO:001654protein aut1/470  | 14/23843  | 0.243313 | 0.551859 | 0.516667 | Pcsk2        |
| GO_BP_m2GO:001937glycolipid c1/470 | 14/23843  | 0.243313 | 0.551859 | 0.516667 | Gba2         |
| GO_BP_m2GO:002170cerebellar l1/470 | 14/23843  | 0.243313 | 0.551859 | 0.516667 | Faim2        |
| GO_BP_m2GO:003094positive re1/470  | 14/23843  | 0.243313 | 0.551859 | 0.516667 | Bmp4         |
| GO_BP_m2GO:003475iron ion tra1/470 | 14/23843  | 0.243313 | 0.551859 | 0.516667 | Slc25a28     |
| GO_BP_m2GO:003637sodium ion1/470   | 14/23843  | 0.243313 | 0.551859 | 0.516667 | Agrn         |

|                                |        |           |          |          |          |              |
|--------------------------------|--------|-----------|----------|----------|----------|--------------|
| GO_BP_m2GO:004292glucocortic   | 1/470  | 14/23843  | 0.243313 | 0.551859 | 0.516667 | Cry1         |
| GO_BP_m2GO:004364dicarboxyli   | 1/470  | 14/23843  | 0.243313 | 0.551859 | 0.516667 | Pm20d2       |
| GO_BP_m2GO:004424lipid digest  | 1/470  | 14/23843  | 0.243313 | 0.551859 | 0.516667 | Acat2        |
| GO_BP_m2GO:004589positive re   | 1/470  | 14/23843  | 0.243313 | 0.551859 | 0.516667 | Psmc5        |
| GO_BP_m2GO:004831Golgi inher   | 1/470  | 14/23843  | 0.243313 | 0.551859 | 0.516667 | Pdcd10       |
| GO_BP_m2GO:004853mucosal-a:    | 1/470  | 14/23843  | 0.243313 | 0.551859 | 0.516667 | Id2          |
| GO_BP_m2GO:004854Peyer's pat   | 1/470  | 14/23843  | 0.243313 | 0.551859 | 0.516667 | Id2          |
| GO_BP_m2GO:005138kinetochori   | 1/470  | 14/23843  | 0.243313 | 0.551859 | 0.516667 | Trappc12     |
| GO_BP_m2GO:006001radial glial  | 1/470  | 14/23843  | 0.243313 | 0.551859 | 0.516667 | Mettl14      |
| GO_BP_m2GO:006039positive re   | 1/470  | 14/23843  | 0.243313 | 0.551859 | 0.516667 | Bmp4         |
| GO_BP_m2GO:006083smoothen      | 1/470  | 14/23843  | 0.243313 | 0.551859 | 0.516667 | lft122       |
| GO_BP_m2GO:006115endothelial   | 1/470  | 14/23843  | 0.243313 | 0.551859 | 0.516667 | Bmp4         |
| GO_BP_m2GO:00613Ccardiac net   | 1/470  | 14/23843  | 0.243313 | 0.551859 | 0.516667 | Bmp4         |
| GO_BP_m2GO:006131renal filtrat | 1/470  | 14/23843  | 0.243313 | 0.551859 | 0.516667 | Bmp4         |
| GO_BP_m2GO:007138cellular res  | 1/470  | 14/23843  | 0.243313 | 0.551859 | 0.516667 | Acaca        |
| GO_BP_m2GO:00718Cpositive re   | 1/470  | 14/23843  | 0.243313 | 0.551859 | 0.516667 | Csf2         |
| GO_BP_m2GO:007211glomerular    | 1/470  | 14/23843  | 0.243313 | 0.551859 | 0.516667 | Bmp4         |
| GO_BP_m2GO:007231glomerular    | 1/470  | 14/23843  | 0.243313 | 0.551859 | 0.516667 | Bmp4         |
| GO_BP_m2GO:009014positive re   | 1/470  | 14/23843  | 0.243313 | 0.551859 | 0.516667 | Pink1        |
| GO_BP_m2GO:009017planar cell   | 1/470  | 14/23843  | 0.243313 | 0.551859 | 0.516667 | Sfrp2        |
| GO_BP_m2GO:009701response tr   | 1/470  | 14/23843  | 0.243313 | 0.551859 | 0.516667 | Csf2         |
| GO_BP_m2GO:009753mast cell r   | 1/470  | 14/23843  | 0.243313 | 0.551859 | 0.516667 | Rac2         |
| GO_BP_m2GO:009885intestinal li | 1/470  | 14/23843  | 0.243313 | 0.551859 | 0.516667 | Acat2        |
| GO_BP_m2GO:014013positive re   | 1/470  | 14/23843  | 0.243313 | 0.551859 | 0.516667 | Ptk2b        |
| GO_BP_m2GO:190121regulation    | 1/470  | 14/23843  | 0.243313 | 0.551859 | 0.516667 | Bmp4         |
| GO_BP_m2GO:19023Cnegative re   | 1/470  | 14/23843  | 0.243313 | 0.551859 | 0.516667 | Agrn         |
| GO_BP_m2GO:190492regulation    | 1/470  | 14/23843  | 0.243313 | 0.551859 | 0.516667 | Pink1        |
| GO_BP_m2GO:190494midbrain d    | 1/470  | 14/23843  | 0.243313 | 0.551859 | 0.516667 | Sfrp2        |
| GO_BP_m2GO:004255neuron ma     | 2/470  | 48/23843  | 0.244217 | 0.552716 | 0.517469 | Farp2/Irx5   |
| GO_BP_m2GO:00433Cregulation    | 2/470  | 48/23843  | 0.244217 | 0.552716 | 0.517469 | Rac2/Stxbp   |
| GO_BP_m2GO:005195positive re   | 2/470  | 48/23843  | 0.244217 | 0.552716 | 0.517469 | Pink1/Stxbp  |
| GO_BP_m2GO:200123regulation    | 2/470  | 48/23843  | 0.244217 | 0.552716 | 0.517469 | Col2a1/Csf   |
| GO_BP_m2GO:000715leukocyte c   | 8/470  | 301/23843 | 0.244496 | 0.55305  | 0.517782 | Bmp4/Il12r   |
| GO_BP_m2GO:004513developme     | 6/470  | 213/23843 | 0.244725 | 0.553268 | 0.517986 | Bmp4/Gdf9    |
| GO_BP_m2GO:000974response tr   | 5/470  | 170/23843 | 0.245122 | 0.553868 | 0.518548 | Glul/Rack1.  |
| GO_BP_m2GO:000269positive re   | 3/470  | 87/23843  | 0.245819 | 0.55421  | 0.518868 | Ptk2b/Rac2   |
| GO_BP_m2GO:000689post-Golgi    | 3/470  | 87/23843  | 0.245819 | 0.55421  | 0.518868 | Csk/Rack1/   |
| GO_BP_m2GO:000661protein ex    | 4/470  | 128/23843 | 0.246066 | 0.55421  | 0.518868 | Hnrnpa2b1    |
| GO_BP_m2GO:000945RNA modif     | 4/470  | 128/23843 | 0.246066 | 0.55421  | 0.518868 | Ftsj1/Mettl. |
| GO_BP_m2GO:001021response tr   | 4/470  | 128/23843 | 0.246066 | 0.55421  | 0.518868 | Ect2/H2afx   |
| GO_BP_m2GO:004559regulation    | 4/470  | 128/23843 | 0.246066 | 0.55421  | 0.518868 | Cebpa/Id2,   |
| GO_BP_m2GO:001657histone mc    | 11/470 | 437/23843 | 0.246332 | 0.554511 | 0.51915  | Aurkb/Auts   |
| GO_BP_m2GO:001025endomem       | 9/470  | 347/23843 | 0.247728 | 0.556691 | 0.521191 | Agrn/Cit/Pi  |
| GO_BP_m2GO:003569cellular res  | 9/470  | 347/23843 | 0.247728 | 0.556691 | 0.521191 | Atf4/Bmp4    |
| GO_BP_m2GO:200014negative re   | 7/470  | 258/23843 | 0.248335 | 0.556691 | 0.521191 | Angpt4/Ar    |
| GO_BP_m2GO:000632DNA packe     | 5/470  | 171/23843 | 0.2488   | 0.556691 | 0.521191 | Asf1a/Chaf   |
| GO_BP_m2GO:000736gastrulatio   | 5/470  | 171/23843 | 0.2488   | 0.556691 | 0.521191 | Bmp4/Rack    |
| GO_BP_m2GO:003428response tr   | 5/470  | 171/23843 | 0.2488   | 0.556691 | 0.521191 | Glul/Rack1.  |

|                                      |           |          |          |          |              |
|--------------------------------------|-----------|----------|----------|----------|--------------|
| GO_BP_m2GO:000183epithelial tr4/470  | 129/23843 | 0.250354 | 0.556691 | 0.521191 | Bambi/Bmp    |
| GO_BP_m2GO:000906cellular am 3/470   | 88/23843  | 0.251102 | 0.556691 | 0.521191 | Hmgcl/lvd/   |
| GO_BP_m2GO:001059positive re3/470    | 88/23843  | 0.251102 | 0.556691 | 0.521191 | Angpt4/Br    |
| GO_BP_m2GO:004847oogenesis 3/470     | 88/23843  | 0.251102 | 0.556691 | 0.521191 | Gdf9/H3f3l   |
| GO_BP_m2GO:005076regulation 3/470    | 88/23843  | 0.251102 | 0.556691 | 0.521191 | Csk/Rack1/   |
| GO_BP_m2GO:00439Cregulation 6/470    | 215/23843 | 0.25126  | 0.556691 | 0.521191 | Chmp3/Ma     |
| GO_BP_m2GO:000602aminoglyc2/470      | 49/23843  | 0.251541 | 0.556691 | 0.521191 | Chst12/Chs   |
| GO_BP_m2GO:004614pigment bi 2/470    | 49/23843  | 0.251541 | 0.556691 | 0.521191 | Alad/Cox10   |
| GO_BP_m2GO:190204regulation 2/470    | 49/23843  | 0.251541 | 0.556691 | 0.521191 | Faim2/Sfrp   |
| GO_BP_m2GO:200064regulation 2/470    | 49/23843  | 0.251541 | 0.556691 | 0.521191 | Agrn/Gpd1    |
| GO_BP_m2GO:004856embryonic 12/470    | 486/23843 | 0.253456 | 0.556691 | 0.521191 | Bmp4/Ceb     |
| GO_BP_m2GO:000226cell activati 7/470 | 260/23843 | 0.254285 | 0.556691 | 0.521191 | Ifna4/Itfg2/ |
| GO_BP_m2GO:001063positive re4/470    | 130/23843 | 0.254657 | 0.556691 | 0.521191 | Angpt4/Br    |
| GO_BP_m2GO:001612sterol met2/470     | 130/23843 | 0.254657 | 0.556691 | 0.521191 | Aplp2/Ceb    |
| GO_BP_m2GO:005166localizator 4/470   | 130/23843 | 0.254657 | 0.556691 | 0.521191 | Agrn/Ap2b    |
| GO_BP_m2GO:009747synaptic ve4/470    | 130/23843 | 0.254657 | 0.556691 | 0.521191 | Bloc1s2/Cp   |
| GO_BP_m2GO:004477mitotic cell 9/470  | 350/23843 | 0.255382 | 0.556691 | 0.521191 | Cit/Cks1b/l  |
| GO_BP_m2GO:004001negative re8/470    | 305/23843 | 0.255435 | 0.556691 | 0.521191 | Angpt4/Ar    |
| GO_BP_m2GO:001065muscle cell 3/470   | 89/23843  | 0.256402 | 0.556691 | 0.521191 | Pde1a/Ptk2   |
| GO_BP_m2GO:004001regulation 3/470    | 89/23843  | 0.256402 | 0.556691 | 0.521191 | Chd7/Ppib    |
| GO_BP_m2GO:000961response tr 7/470   | 261/23843 | 0.257276 | 0.556691 | 0.521191 | Ifna4/Ifnl3/ |
| GO_BP_m2GO:001063epithelial c 7/470  | 261/23843 | 0.257276 | 0.556691 | 0.521191 | Angpt4/Br    |
| GO_BP_m2GO:000021meiotic spi 1/470   | 15/23843  | 0.258237 | 0.556691 | 0.521191 | Espl1        |
| GO_BP_m2GO:000029nuclear-tra 1/470   | 15/23843  | 0.258237 | 0.556691 | 0.521191 | Exosc2       |
| GO_BP_m2GO:000633nucleosom 1/470     | 15/23843  | 0.258237 | 0.556691 | 0.521191 | Smarcd1      |
| GO_BP_m2GO:000667glycosylcer 1/470   | 15/23843  | 0.258237 | 0.556691 | 0.521191 | Gba2         |
| GO_BP_m2GO:000734fusion of sr 1/470  | 15/23843  | 0.258237 | 0.556691 | 0.521191 | Izumo1r      |
| GO_BP_m2GO:000737segment sr 1/470    | 15/23843  | 0.258237 | 0.556691 | 0.521191 | Mafb         |
| GO_BP_m2GO:001017embryonic 1/470     | 15/23843  | 0.258237 | 0.556691 | 0.521191 | Ift122       |
| GO_BP_m2GO:001045negative re 1/470   | 15/23843  | 0.258237 | 0.556691 | 0.521191 | Sfrp2        |
| GO_BP_m2GO:001064cell commt 1/470    | 15/23843  | 0.258237 | 0.556691 | 0.521191 | Pde4d        |
| GO_BP_m2GO:001591peroxisom 1/470     | 15/23843  | 0.258237 | 0.556691 | 0.521191 | Pex5l        |
| GO_BP_m2GO:001802peptidyl-ly 1/470   | 15/23843  | 0.258237 | 0.556691 | 0.521191 | Kdm3a        |
| GO_BP_m2GO:001998translesion 1/470   | 15/23843  | 0.258237 | 0.556691 | 0.521191 | Zbtb1        |
| GO_BP_m2GO:002169cerebellar l 1/470  | 15/23843  | 0.258237 | 0.556691 | 0.521191 | Faim2        |
| GO_BP_m2GO:003126pseudopoc 1/470     | 15/23843  | 0.258237 | 0.556691 | 0.521191 | Klhl41       |
| GO_BP_m2GO:003278negative re 1/470   | 15/23843  | 0.258237 | 0.556691 | 0.521191 | Agrn         |
| GO_BP_m2GO:003295inositol tris 1/470 | 15/23843  | 0.258237 | 0.556691 | 0.521191 | Ptk2b        |
| GO_BP_m2GO:003323positive re 1/470   | 15/23843  | 0.258237 | 0.556691 | 0.521191 | Tollip       |
| GO_BP_m2GO:003564locomotory 1/470    | 15/23843  | 0.258237 | 0.556691 | 0.521191 | Penk         |
| GO_BP_m2GO:00424Cristae forn 1/470   | 15/23843  | 0.258237 | 0.556691 | 0.521191 | Pink1        |
| GO_BP_m2GO:004316ubiquitin-c 1/470   | 15/23843  | 0.258237 | 0.556691 | 0.521191 | Tsg101       |
| GO_BP_m2GO:004432cellular res 1/470  | 15/23843  | 0.258237 | 0.556691 | 0.521191 | Nr4a3        |
| GO_BP_m2GO:004479positive re 1/470   | 15/23843  | 0.258237 | 0.556691 | 0.521191 | Ppib         |
| GO_BP_m2GO:004482modulator 1/470     | 15/23843  | 0.258237 | 0.556691 | 0.521191 | Ppib         |
| GO_BP_m2GO:004577negative re 1/470   | 15/23843  | 0.258237 | 0.556691 | 0.521191 | Csk          |
| GO_BP_m2GO:004611nucleobase 1/470    | 15/23843  | 0.258237 | 0.556691 | 0.521191 | Cad          |
| GO_BP_m2GO:004613pyrimidine 1/470    | 15/23843  | 0.258237 | 0.556691 | 0.521191 | Cad          |

|                                     |           |          |          |          |             |
|-------------------------------------|-----------|----------|----------|----------|-------------|
| GO_BP_m2GO:00483Corganelle in1/470  | 15/23843  | 0.258237 | 0.556691 | 0.521191 | Pdcd10      |
| GO_BP_m2GO:005087white fat c1/470   | 15/23843  | 0.258237 | 0.556691 | 0.521191 | Cebpa       |
| GO_BP_m2GO:005157positive re1/470   | 15/23843  | 0.258237 | 0.556691 | 0.521191 | Auts2       |
| GO_BP_m2GO:005164Golgi locali1/470  | 15/23843  | 0.258237 | 0.556691 | 0.521191 | Pdcd10      |
| GO_BP_m2GO:005192sulfation 1/470    | 15/23843  | 0.258237 | 0.556691 | 0.521191 | Hs3st3b1    |
| GO_BP_m2GO:006034heart trabe1/470   | 15/23843  | 0.258237 | 0.556691 | 0.521191 | Adgrg6      |
| GO_BP_m2GO:006044branching 1/470    | 15/23843  | 0.258237 | 0.556691 | 0.521191 | Bmp4        |
| GO_BP_m2GO:00613Ccardiac net1/470   | 15/23843  | 0.258237 | 0.556691 | 0.521191 | Bmp4        |
| GO_BP_m2GO:007093' -UTR-m1/470      | 15/23843  | 0.258237 | 0.556691 | 0.521191 | Elavl1      |
| GO_BP_m2GO:00715otic vesicle 1/470  | 15/23843  | 0.258237 | 0.556691 | 0.521191 | Col2a1      |
| GO_BP_m2GO:007207kidney me1/470     | 15/23843  | 0.258237 | 0.556691 | 0.521191 | Bmp4        |
| GO_BP_m2GO:00721Cglomerular 1/470   | 15/23843  | 0.258237 | 0.556691 | 0.521191 | Bmp4        |
| GO_BP_m2GO:007218ureter dev1/470    | 15/23843  | 0.258237 | 0.556691 | 0.521191 | Bmp4        |
| GO_BP_m2GO:007228metaneph1/470      | 15/23843  | 0.258237 | 0.556691 | 0.521191 | Bmp4        |
| GO_BP_m2GO:009005negative re1/470   | 15/23843  | 0.258237 | 0.556691 | 0.521191 | Pdcd10      |
| GO_BP_m2GO:009008regulation 1/470   | 15/23843  | 0.258237 | 0.556691 | 0.521191 | Psmc5       |
| GO_BP_m2GO:009017regulation 1/470   | 15/23843  | 0.258237 | 0.556691 | 0.521191 | Sfrp2       |
| GO_BP_m2GO:190003regulation 1/470   | 15/23843  | 0.258237 | 0.556691 | 0.521191 | Pink1       |
| GO_BP_m2GO:190107regulation 1/470   | 15/23843  | 0.258237 | 0.556691 | 0.521191 | Pde4d       |
| GO_BP_m2GO:190152regulation 1/470   | 15/23843  | 0.258237 | 0.556691 | 0.521191 | Pink1       |
| GO_BP_m2GO:190172regulation 1/470   | 15/23843  | 0.258237 | 0.556691 | 0.521191 | Bmp4        |
| GO_BP_m2GO:190354positive re1/470   | 15/23843  | 0.258237 | 0.556691 | 0.521191 | Tsg101      |
| GO_BP_m2GO:190446positive re1/470   | 15/23843  | 0.258237 | 0.556691 | 0.521191 | Mavs        |
| GO_BP_m2GO:200019regulation 1/470   | 15/23843  | 0.258237 | 0.556691 | 0.521191 | Gdf9        |
| GO_BP_m2GO:200047regulation 1/470   | 15/23843  | 0.258237 | 0.556691 | 0.521191 | Prkar1a     |
| GO_BP_m2GO:200064negative re1/470   | 15/23843  | 0.258237 | 0.556691 | 0.521191 | Vax1        |
| GO_BP_m2GO:000166behavioral 2/470   | 50/23843  | 0.25887  | 0.556691 | 0.521191 | Grm7/Penk   |
| GO_BP_m2GO:000999oocyte diff2/470   | 50/23843  | 0.25887  | 0.556691 | 0.521191 | Gdf9/Ptk2k  |
| GO_BP_m2GO:001401negative re2/470   | 50/23843  | 0.25887  | 0.556691 | 0.521191 | Bmp4/Id2    |
| GO_BP_m2GO:007022negative re2/470   | 50/23843  | 0.25887  | 0.556691 | 0.521191 | Aurkb/Bmp   |
| GO_BP_m2GO:190161organic hyc2/470   | 50/23843  | 0.25887  | 0.556691 | 0.521191 | Mttr2/Mtr   |
| GO_BP_m2GO:000763feeding be 4/470   | 131/23843 | 0.258975 | 0.556691 | 0.521191 | Agrp/Aplp   |
| GO_BP_m2GO:003434response tr4/470   | 131/23843 | 0.258975 | 0.556691 | 0.521191 | Eprs/Il12rb |
| GO_BP_m2GO:190156fatty acid d4/470  | 131/23843 | 0.258975 | 0.556691 | 0.521191 | Cyp2g1/Fa   |
| GO_BP_m2GO:005079regulation 5/470   | 174/23843 | 0.259916 | 0.557932 | 0.522352 | Glul/Oxct1  |
| GO_BP_m2GO:007169anatomical 5/470   | 174/23843 | 0.259916 | 0.557932 | 0.522352 | Farp2/Irx5/ |
| GO_BP_m2GO:00486Creproductiv 11/470 | 443/23843 | 0.259951 | 0.557932 | 0.522352 | Bmp4/Ceb    |
| GO_BP_m2GO:000189tissue hom 6/470   | 218/23843 | 0.261153 | 0.559938 | 0.524231 | Acaca/Col2  |
| GO_BP_m2GO:006102membrane 6/470     | 218/23843 | 0.261153 | 0.559938 | 0.524231 | Chmp3/Izu   |
| GO_BP_m2GO:000244myeloid let 3/470  | 90/23843  | 0.261716 | 0.560859 | 0.525093 | Nr4a3/Rac   |
| GO_BP_m2GO:00091Cglycoprote 7/470   | 263/23843 | 0.263289 | 0.563653 | 0.527709 | Chst12/Gal  |
| GO_BP_m2GO:009013epithelium 7/470   | 263/23843 | 0.263289 | 0.563653 | 0.527709 | Angpt4/Br   |
| GO_BP_m2GO:00434Cpositive re6/470   | 219/23843 | 0.264474 | 0.564296 | 0.528311 | Bmp4/Csk/   |
| GO_BP_m2GO:006053muscle tiss 11/470 | 445/23843 | 0.264548 | 0.564296 | 0.528311 | Bmp4/Chd    |
| GO_BP_m2GO:00022Cbehavioral 2/470   | 51/23843  | 0.266202 | 0.564296 | 0.528311 | Grm7/Penk   |
| GO_BP_m2GO:00322Cpositive re2/470   | 51/23843  | 0.266202 | 0.564296 | 0.528311 | Aurkb/Hnr   |
| GO_BP_m2GO:003361membrane 2/470     | 51/23843  | 0.266202 | 0.564296 | 0.528311 | Bace1/Mbt   |
| GO_BP_m2GO:00469Cregulation 2/470   | 51/23843  | 0.266202 | 0.564296 | 0.528311 | Bloc1s2/He  |



|                                     |           |          |          |          |             |
|-------------------------------------|-----------|----------|----------|----------|-------------|
| GO_BP_m2GO:005125protein het2/470   | 51/23843  | 0.266202 | 0.564296 | 0.528311 | Agrrn/Farsa |
| GO_BP_m2GO:005144regulation 2/470   | 51/23843  | 0.266202 | 0.564296 | 0.528311 | Eif4g3/Lfng |
| GO_BP_m2GO:005156histone H3 2/470   | 51/23843  | 0.266202 | 0.564296 | 0.528311 | Auts2/Hist  |
| GO_BP_m2GO:008600cardiac mu2/470    | 51/23843  | 0.266202 | 0.564296 | 0.528311 | Gpd1l/Kcni  |
| GO_BP_m2GO:000989negative re7/470   | 264/23843 | 0.26631  | 0.564296 | 0.528311 | Alad/Dhx3   |
| GO_BP_m2GO:003105positive re3/470   | 91/23843  | 0.267045 | 0.564296 | 0.528311 | Auts2/Pink  |
| GO_BP_m2GO:000081sister chr5/470    | 176/23843 | 0.267391 | 0.564296 | 0.528311 | Aurkb/Citf  |
| GO_BP_m2GO:190227regulation 5/470   | 176/23843 | 0.267391 | 0.564296 | 0.528311 | Auts2/Kdm   |
| GO_BP_m2GO:200123negative re6/470   | 220/23843 | 0.267805 | 0.564296 | 0.528311 | Bmp4/Col2   |
| GO_BP_m2GO:006145reproductiv11/470  | 447/23843 | 0.269171 | 0.564296 | 0.528311 | Bmp4/Ceb    |
| GO_BP_m2GO:009013tissue migr7/470   | 265/23843 | 0.269341 | 0.564296 | 0.528311 | Angpt4/Br   |
| GO_BP_m2GO:004247ear morph4/470     | 134/23843 | 0.272014 | 0.564296 | 0.528311 | Chd7/Col2   |
| GO_BP_m2GO:190129nucleoside 4/470   | 134/23843 | 0.272014 | 0.564296 | 0.528311 | Rack1/Pde   |
| GO_BP_m2GO:014001mitotic nuc7/470   | 266/23843 | 0.272381 | 0.564296 | 0.528311 | Aurkb/Bmp   |
| GO_BP_m2GO:000167long-chain3/470    | 92/23843  | 0.272386 | 0.564296 | 0.528311 | Cyp2g1/Fa   |
| GO_BP_m2GO:000704lysosomal t3/470   | 92/23843  | 0.272386 | 0.564296 | 0.528311 | Chmp3/Pir   |
| GO_BP_m2GO:000092cell separa1/470   | 16/23843  | 0.272868 | 0.564296 | 0.528311 | Chmp3       |
| GO_BP_m2GO:000182histamine 1/470    | 16/23843  | 0.272868 | 0.564296 | 0.528311 | Csf2        |
| GO_BP_m2GO:000207epithelial c1/470  | 16/23843  | 0.272868 | 0.564296 | 0.528311 | Six3        |
| GO_BP_m2GO:000316cardiac cor1/470   | 16/23843  | 0.272868 | 0.564296 | 0.528311 | Id2         |
| GO_BP_m2GO:000322ventricular 1/470  | 16/23843  | 0.272868 | 0.564296 | 0.528311 | Chd7        |
| GO_BP_m2GO:000646signal pept1/470   | 16/23843  | 0.272868 | 0.564296 | 0.528311 | Sec11c      |
| GO_BP_m2GO:000661cotranslati1/470   | 16/23843  | 0.272868 | 0.564296 | 0.528311 | Sec63       |
| GO_BP_m2GO:000687cellular co1/470   | 16/23843  | 0.272868 | 0.564296 | 0.528311 | Aplp2       |
| GO_BP_m2GO:000721G-protein 1/470    | 16/23843  | 0.272868 | 0.564296 | 0.528311 | Grm7        |
| GO_BP_m2GO:000751adult heart1/470   | 16/23843  | 0.272868 | 0.564296 | 0.528311 | Chd7        |
| GO_BP_m2GO:000833histone mF1/470    | 16/23843  | 0.272868 | 0.564296 | 0.528311 | Xrn1        |
| GO_BP_m2GO:000922pyrimidine 1/470   | 16/23843  | 0.272868 | 0.564296 | 0.528311 | Cad         |
| GO_BP_m2GO:001022response tr1/470   | 16/23843  | 0.272868 | 0.564296 | 0.528311 | Mfap4       |
| GO_BP_m2GO:001091regulation 1/470   | 16/23843  | 0.272868 | 0.564296 | 0.528311 | Ptk2b       |
| GO_BP_m2GO:003110septin ring 1/470  | 16/23843  | 0.272868 | 0.564296 | 0.528311 | 9-Sep       |
| GO_BP_m2GO:003195corticoster1/470   | 16/23843  | 0.272868 | 0.564296 | 0.528311 | Cry1        |
| GO_BP_m2GO:003218septin cyto1/470   | 16/23843  | 0.272868 | 0.564296 | 0.528311 | 9-Sep       |
| GO_BP_m2GO:003231prostaglan1/470    | 16/23843  | 0.272868 | 0.564296 | 0.528311 | Acsl4       |
| GO_BP_m2GO:003438lipid particl1/470 | 16/23843  | 0.272868 | 0.564296 | 0.528311 | Spg20       |
| GO_BP_m2GO:003523ionotropic 1/470   | 16/23843  | 0.272868 | 0.564296 | 0.528311 | Ptk2b       |
| GO_BP_m2GO:004255pteridine-c1/470   | 16/23843  | 0.272868 | 0.564296 | 0.528311 | Pcbd1       |
| GO_BP_m2GO:004583positive re1/470   | 16/23843  | 0.272868 | 0.564296 | 0.528311 | Eif4g3      |
| GO_BP_m2GO:004589regulation 1/470   | 16/23843  | 0.272868 | 0.564296 | 0.528311 | Psmc5       |
| GO_BP_m2GO:004651ceramide c1/470    | 16/23843  | 0.272868 | 0.564296 | 0.528311 | Gba2        |
| GO_BP_m2GO:004871positive re1/470   | 16/23843  | 0.272868 | 0.564296 | 0.528311 | Id2         |
| GO_BP_m2GO:006002convergen1/470     | 16/23843  | 0.272868 | 0.564296 | 0.528311 | Sfrp2       |
| GO_BP_m2GO:006030regulation 1/470   | 16/23843  | 0.272868 | 0.564296 | 0.528311 | Kcni2       |
| GO_BP_m2GO:006064mammary 1/470      | 16/23843  | 0.272868 | 0.564296 | 0.528311 | Id2         |
| GO_BP_m2GO:007081phosphory1/470     | 16/23843  | 0.272868 | 0.564296 | 0.528311 | Gtf2h1      |
| GO_BP_m2GO:007137cellular res1/470  | 16/23843  | 0.272868 | 0.564296 | 0.528311 | Acaca       |
| GO_BP_m2GO:007149cellular res1/470  | 16/23843  | 0.272868 | 0.564296 | 0.528311 | Ptk2b       |
| GO_BP_m2GO:007162vocalizatio1/470   | 16/23843  | 0.272868 | 0.564296 | 0.528311 | Auts2       |

|                                               |           |          |          |          |             |
|-----------------------------------------------|-----------|----------|----------|----------|-------------|
| GO_BP_m2GO:007201glomerular 1/470             | 16/23843  | 0.272868 | 0.564296 | 0.528311 | Bmp4        |
| GO_BP_m2GO:008601membrane 1/470               | 16/23843  | 0.272868 | 0.564296 | 0.528311 | Kcnh2       |
| GO_BP_m2GO:009017establishment 1/470          | 16/23843  | 0.272868 | 0.564296 | 0.528311 | Sfrp2       |
| GO_BP_m2GO:009019regulation 1/470             | 16/23843  | 0.272868 | 0.564296 | 0.528311 | Bmp4        |
| GO_BP_m2GO:009709craniofacial 1/470           | 16/23843  | 0.272868 | 0.564296 | 0.528311 | Bmp4        |
| GO_BP_m2GO:009729iron ion import 1/470        | 16/23843  | 0.272868 | 0.564296 | 0.528311 | Slc25a28    |
| GO_BP_m2GO:190219negative regulation 1/470    | 16/23843  | 0.272868 | 0.564296 | 0.528311 | Chmp3       |
| GO_BP_m2GO:190353protein localization 1/470   | 16/23843  | 0.272868 | 0.564296 | 0.528311 | Rab11a      |
| GO_BP_m2GO:190354regulation 1/470             | 16/23843  | 0.272868 | 0.564296 | 0.528311 | Tsg101      |
| GO_BP_m2GO:190377regulation 1/470             | 16/23843  | 0.272868 | 0.564296 | 0.528311 | Pde4d       |
| GO_BP_m2GO:190379regulation 1/470             | 16/23843  | 0.272868 | 0.564296 | 0.528311 | Bmp4        |
| GO_BP_m2GO:190515regulation 1/470             | 16/23843  | 0.272868 | 0.564296 | 0.528311 | Syt11       |
| GO_BP_m2GO:199084adaptive response 1/470      | 16/23843  | 0.272868 | 0.564296 | 0.528311 | Ucp2        |
| GO_BP_m2GO:200029regulation 1/470             | 16/23843  | 0.272868 | 0.564296 | 0.528311 | Klhl41      |
| GO_BP_m2GO:200038regulation 1/470             | 16/23843  | 0.272868 | 0.564296 | 0.528311 | Sfrp2       |
| GO_BP_m2GO:001631dephosphorylation 9/470      | 357/23843 | 0.273532 | 0.564559 | 0.528557 | Elfn2/Ell/M |
| GO_BP_m2GO:001065negative regulation 2/470    | 52/23843  | 0.273534 | 0.564559 | 0.528557 | Ptk2b/Sfrp2 |
| GO_BP_m2GO:003051negative regulation 2/470    | 52/23843  | 0.273534 | 0.564559 | 0.528557 | Sfrp2/Spg2  |
| GO_BP_m2GO:007162regulation 2/470             | 52/23843  | 0.273534 | 0.564559 | 0.528557 | Rac2/S100b  |
| GO_BP_m2GO:001656covalent modification 11/470 | 449/23843 | 0.27382  | 0.564871 | 0.52885  | Aurkb/Autsc |
| GO_BP_m2GO:009025regulation 6/470             | 222/23843 | 0.274499 | 0.565994 | 0.5299   | Agrn/Nr4a1  |
| GO_BP_m2GO:000806regulation 5/470             | 178/23843 | 0.274913 | 0.566326 | 0.530212 | Cit/Ptk2b/F |
| GO_BP_m2GO:001605vesicle organization 8/470   | 312/23843 | 0.27493  | 0.566326 | 0.530212 | Rab11a/Sn   |
| GO_BP_m2GO:001648cytosolic transport 4/470    | 135/23843 | 0.276386 | 0.567124 | 0.530959 | Chmp3/De    |
| GO_BP_m2GO:003268regulation 4/470             | 135/23843 | 0.276386 | 0.567124 | 0.530959 | Cybb/Mavs   |
| GO_BP_m2GO:007208stem cell population 4/470   | 135/23843 | 0.276386 | 0.567124 | 0.530959 | Bmp4/Sfrp2  |
| GO_BP_m2GO:009950synaptic vesicle 4/470       | 135/23843 | 0.276386 | 0.567124 | 0.530959 | Cplx4/Sh3c  |
| GO_BP_m2GO:001077negative regulation 3/470    | 93/23843  | 0.277739 | 0.567124 | 0.530959 | Cit/Rnf6/Sr |
| GO_BP_m2GO:001082regulation 3/470             | 93/23843  | 0.277739 | 0.567124 | 0.530959 | Aspscr1/Nr  |
| GO_BP_m2GO:003027negative regulation 3/470    | 93/23843  | 0.277739 | 0.567124 | 0.530959 | Id2/Nbr1/F  |
| GO_BP_m2GO:003083positive regulation 3/470    | 93/23843  | 0.277739 | 0.567124 | 0.530959 | Ptk2b/Rac2  |
| GO_BP_m2GO:007148cellular response 3/470      | 93/23843  | 0.277739 | 0.567124 | 0.530959 | Aurkb/Mfa   |
| GO_BP_m2GO:190274regulation 3/470             | 93/23843  | 0.277739 | 0.567124 | 0.530959 | Foxo4/Kcnn  |
| GO_BP_m2GO:000007cell cycle control 5/470     | 179/23843 | 0.27869  | 0.567124 | 0.530959 | Aurkb/Cdc   |
| GO_BP_m2GO:003083regulation 5/470             | 179/23843 | 0.27869  | 0.567124 | 0.530959 | Cit/Ptk2b/F |
| GO_BP_m2GO:000751muscle organization 10/470   | 405/23843 | 0.27895  | 0.567124 | 0.530959 | Bmp4/Chd    |
| GO_BP_m2GO:006138trabecula network 2/470      | 53/23843  | 0.280862 | 0.567124 | 0.530959 | Adgrg6/Ch   |
| GO_BP_m2GO:004828organelle function 5/470     | 180/23843 | 0.282478 | 0.567124 | 0.530959 | Chmp3/Snj   |
| GO_BP_m2GO:003051regulation 3/470             | 94/23843  | 0.283102 | 0.567124 | 0.530959 | Bmp4/Sfrp2  |
| GO_BP_m2GO:190210negative regulation 3/470    | 94/23843  | 0.283102 | 0.567124 | 0.530959 | Bmp4/Id2/   |
| GO_BP_m2GO:200006positive regulation 3/470    | 94/23843  | 0.283102 | 0.567124 | 0.530959 | Rack1/Ptk2  |
| GO_BP_m2GO:190406regulation 8/470             | 315/23843 | 0.28341  | 0.567124 | 0.530959 | Agrn/Bmp4   |
| GO_BP_m2GO:006024anatomical 9/470             | 361/23843 | 0.28407  | 0.567124 | 0.530959 | Acaca/Aurk  |
| GO_BP_m2GO:003264tumor necrosis factor 4/470  | 137/23843 | 0.285162 | 0.567124 | 0.530959 | Cybb/Mavs   |
| GO_BP_m2GO:190355regulation 4/470             | 137/23843 | 0.285162 | 0.567124 | 0.530959 | Cybb/Mavs   |
| GO_BP_m2GO:001072negative regulation 9/470    | 362/23843 | 0.286722 | 0.567124 | 0.530959 | Bmp4/Cit/   |
| GO_BP_m2GO:000005ribosomal biogenesis 1/470   | 17/23843  | 0.287211 | 0.567124 | 0.530959 | Ran         |
| GO_BP_m2GO:000192positive regulation 1/470    | 17/23843  | 0.287211 | 0.567124 | 0.530959 | Vamp3       |

|                                     |          |          |          |          |         |
|-------------------------------------|----------|----------|----------|----------|---------|
| GO_BP_m2GO:000196suckling be1/470   | 17/23843 | 0.287211 | 0.567124 | 0.530959 | Ap1p2   |
| GO_BP_m2GO:00062C pyrimidine 1/470  | 17/23843 | 0.287211 | 0.567124 | 0.530959 | Cad     |
| GO_BP_m2GO:000662protein tar1/470   | 17/23843 | 0.287211 | 0.567124 | 0.530959 | Pex5l   |
| GO_BP_m2GO:000696cellular def1/470  | 17/23843 | 0.287211 | 0.567124 | 0.530959 | Ptk2b   |
| GO_BP_m2GO:000697DNA dama1/470      | 17/23843 | 0.287211 | 0.567124 | 0.530959 | Pcbp4   |
| GO_BP_m2GO:00072C activation c1/470 | 17/23843 | 0.287211 | 0.567124 | 0.530959 | Sele    |
| GO_BP_m2GO:000821estrogen r1/470    | 17/23843 | 0.287211 | 0.567124 | 0.530959 | Sgpl1   |
| GO_BP_m2GO:00091C coenzyme 1/470    | 17/23843 | 0.287211 | 0.567124 | 0.530959 | Pm20d2  |
| GO_BP_m2GO:000914pyrimidine 1/470   | 17/23843 | 0.287211 | 0.567124 | 0.530959 | Cad     |
| GO_BP_m2GO:000921pyrimidine 1/470   | 17/23843 | 0.287211 | 0.567124 | 0.530959 | Cad     |
| GO_BP_m2GO:001076negative re1/470   | 17/23843 | 0.287211 | 0.567124 | 0.530959 | Agrn    |
| GO_BP_m2GO:001098regulation 1/470   | 17/23843 | 0.287211 | 0.567124 | 0.530959 | Csk     |
| GO_BP_m2GO:002166cerebellar c1/470  | 17/23843 | 0.287211 | 0.567124 | 0.530959 | Faim2   |
| GO_BP_m2GO:003081positive re1/470   | 17/23843 | 0.287211 | 0.567124 | 0.530959 | Rack1   |
| GO_BP_m2GO:003082regulation 1/470   | 17/23843 | 0.287211 | 0.567124 | 0.530959 | Ptk2b   |
| GO_BP_m2GO:003149chromatin 1/470    | 17/23843 | 0.287211 | 0.567124 | 0.530959 | Smarcd1 |
| GO_BP_m2GO:003162synaptic ve1/470   | 17/23843 | 0.287211 | 0.567124 | 0.530959 | Stxbp1  |
| GO_BP_m2GO:003222regulation 1/470   | 17/23843 | 0.287211 | 0.567124 | 0.530959 | Pink1   |
| GO_BP_m2GO:00324C melanosome1/470   | 17/23843 | 0.287211 | 0.567124 | 0.530959 | Rab11a  |
| GO_BP_m2GO:00325C endosome 1/470    | 17/23843 | 0.287211 | 0.567124 | 0.530959 | Chmp3   |
| GO_BP_m2GO:003298protein-D1/470     | 17/23843 | 0.287211 | 0.567124 | 0.530959 | Smarcd1 |
| GO_BP_m2GO:003353fatty acid b1/470  | 17/23843 | 0.287211 | 0.567124 | 0.530959 | Ivd     |
| GO_BP_m2GO:003375ribosome l1/470    | 17/23843 | 0.287211 | 0.567124 | 0.530959 | Ran     |
| GO_BP_m2GO:003431diol biosyn1/470   | 17/23843 | 0.287211 | 0.567124 | 0.530959 | Pcbd1   |
| GO_BP_m2GO:003447snRNA 3'-c1/470    | 17/23843 | 0.287211 | 0.567124 | 0.530959 | Exosc2  |
| GO_BP_m2GO:003465nucleobase1/470    | 17/23843 | 0.287211 | 0.567124 | 0.530959 | Mgat1   |
| GO_BP_m2GO:003606fucosylation1/470  | 17/23843 | 0.287211 | 0.567124 | 0.530959 | Lfng    |
| GO_BP_m2GO:003952RIG-I signa1/470   | 17/23843 | 0.287211 | 0.567124 | 0.530959 | Mavs    |
| GO_BP_m2GO:004248regulation 1/470   | 17/23843 | 0.287211 | 0.567124 | 0.530959 | Bmp4    |
| GO_BP_m2GO:004265regulation 1/470   | 17/23843 | 0.287211 | 0.567124 | 0.530959 | Sfrp2   |
| GO_BP_m2GO:004275negative re1/470   | 17/23843 | 0.287211 | 0.567124 | 0.530959 | Cry1    |
| GO_BP_m2GO:004357peroxisome1/470    | 17/23843 | 0.287211 | 0.567124 | 0.530959 | Pex5l   |
| GO_BP_m2GO:004358nose devel1/470    | 17/23843 | 0.287211 | 0.567124 | 0.530959 | Chd7    |
| GO_BP_m2GO:004432response tr1/470   | 17/23843 | 0.287211 | 0.567124 | 0.530959 | Nr4a3   |
| GO_BP_m2GO:00456C positive re1/470  | 17/23843 | 0.287211 | 0.567124 | 0.530959 | Bmp4    |
| GO_BP_m2GO:004613pyrimidine 1/470   | 17/23843 | 0.287211 | 0.567124 | 0.530959 | Cad     |
| GO_BP_m2GO:004618aldehyde b1/470    | 17/23843 | 0.287211 | 0.567124 | 0.530959 | Kdm3a   |
| GO_BP_m2GO:004634amino sug1/470     | 17/23843 | 0.287211 | 0.567124 | 0.530959 | Mgat1   |
| GO_BP_m2GO:004685negative re1/470   | 17/23843 | 0.287211 | 0.567124 | 0.530959 | Csk     |
| GO_BP_m2GO:004849anterograd1/470    | 17/23843 | 0.287211 | 0.567124 | 0.530959 | Bloc1s2 |
| GO_BP_m2GO:005065chondroitin1/470   | 17/23843 | 0.287211 | 0.567124 | 0.530959 | Chst12  |
| GO_BP_m2GO:00510C positive re1/470  | 17/23843 | 0.287211 | 0.567124 | 0.530959 | Ptk2b   |
| GO_BP_m2GO:005195negative re1/470   | 17/23843 | 0.287211 | 0.567124 | 0.530959 | Grm7    |
| GO_BP_m2GO:005507copper ion 1/470   | 17/23843 | 0.287211 | 0.567124 | 0.530959 | Ap1p2   |
| GO_BP_m2GO:006031regulation 1/470   | 17/23843 | 0.287211 | 0.567124 | 0.530959 | Pde4d   |
| GO_BP_m2GO:006097cell migrati1/470  | 17/23843 | 0.287211 | 0.567124 | 0.530959 | Bmp4    |
| GO_BP_m2GO:007024regulation 1/470   | 17/23843 | 0.287211 | 0.567124 | 0.530959 | Bmp4    |
| GO_BP_m2GO:007082heterochro1/470    | 17/23843 | 0.287211 | 0.567124 | 0.530959 | H3f3b   |

|                                       |           |          |          |          |             |
|---------------------------------------|-----------|----------|----------|----------|-------------|
| GO_BP_m2GO:007092regulation 1/470     | 17/23843  | 0.287211 | 0.567124 | 0.530959 | Bmp4        |
| GO_BP_m2GO:007266protein loc 1/470    | 17/23843  | 0.287211 | 0.567124 | 0.530959 | Pex5l       |
| GO_BP_m2GO:007266establishm 1/470     | 17/23843  | 0.287211 | 0.567124 | 0.530959 | Pex5l       |
| GO_BP_m2GO:008018histone H3 1/470     | 17/23843  | 0.287211 | 0.567124 | 0.530959 | Hist1h1e    |
| GO_BP_m2GO:009003regulation 1/470     | 17/23843  | 0.287211 | 0.567124 | 0.530959 | Gpd1l       |
| GO_BP_m2GO:00995C vesicle fusio 1/470 | 17/23843  | 0.287211 | 0.567124 | 0.530959 | Stxbp1      |
| GO_BP_m2GO:009951synaptic ve 1/470    | 17/23843  | 0.287211 | 0.567124 | 0.530959 | Bloc1s2     |
| GO_BP_m2GO:009951synaptic ve 1/470    | 17/23843  | 0.287211 | 0.567124 | 0.530959 | Bloc1s2     |
| GO_BP_m2GO:190217negative re 1/470    | 17/23843  | 0.287211 | 0.567124 | 0.530959 | Pink1       |
| GO_BP_m2GO:190359positive re 1/470    | 17/23843  | 0.287211 | 0.567124 | 0.530959 | Pink1       |
| GO_BP_m2GO:190435positive re 1/470    | 17/23843  | 0.287211 | 0.567124 | 0.530959 | Aurkb       |
| GO_BP_m2GO:190531semi-lunar 1/470     | 17/23843  | 0.287211 | 0.567124 | 0.530959 | Bmp4        |
| GO_BP_m2GO:20000C regulation 1/470    | 17/23843  | 0.287211 | 0.567124 | 0.530959 | Cry1        |
| GO_BP_m2GO:20003E positive re 1/470   | 17/23843  | 0.287211 | 0.567124 | 0.530959 | Bmp4        |
| GO_BP_m2GO:200084regulation 1/470     | 17/23843  | 0.287211 | 0.567124 | 0.530959 | Cry1        |
| GO_BP_m2GO:000833endosome 2/470       | 54/23843  | 0.288184 | 0.567709 | 0.531506 | Chmp3/Tsc   |
| GO_BP_m2GO:003049maturation 2/470     | 54/23843  | 0.288184 | 0.567709 | 0.531506 | Pwp2/Utp1   |
| GO_BP_m2GO:003646synaptic ve 2/470    | 54/23843  | 0.288184 | 0.567709 | 0.531506 | Sh3gl1/Syt  |
| GO_BP_m2GO:004259fear respo 2/470     | 54/23843  | 0.288184 | 0.567709 | 0.531506 | Grm7/Penk   |
| GO_BP_m2GO:004617polyol bios 2/470    | 54/23843  | 0.288184 | 0.567709 | 0.531506 | Pcbd1/Ptk2  |
| GO_BP_m2GO:00356C protein de 3/470    | 95/23843  | 0.288473 | 0.567746 | 0.53154  | Dyrk1a/Pin  |
| GO_BP_m2GO:004684bone remo 3/470      | 95/23843  | 0.288473 | 0.567746 | 0.53154  | Csk/Ptk2b/  |
| GO_BP_m2GO:00070E chromoso 8/470      | 317/23843 | 0.289101 | 0.568714 | 0.532447 | Aurkb/Cit1  |
| GO_BP_m2GO:000167cellular glu 4/470   | 138/23843 | 0.289566 | 0.56883  | 0.532555 | Foxa3/Rac   |
| GO_BP_m2GO:000268positive re 4/470    | 138/23843 | 0.289566 | 0.56883  | 0.532555 | Ptk2b/Rac   |
| GO_BP_m2GO:00070E cell cycle a 4/470  | 138/23843 | 0.289566 | 0.56883  | 0.532555 | Foxo4/Id2/  |
| GO_BP_m2GO:190352regulation 6/470     | 227/23843 | 0.2914   | 0.572165 | 0.535678 | Agrn/Gpd1   |
| GO_BP_m2GO:009873macromole 3/470      | 96/23843  | 0.293852 | 0.57487  | 0.53821  | Dyrk1a/Pin  |
| GO_BP_m2GO:00303C positive re 5/470   | 183/23843 | 0.2939   | 0.57487  | 0.53821  | Acsl4/Exos  |
| GO_BP_m2GO:004354endothelial 5/470    | 183/23843 | 0.2939   | 0.57487  | 0.53821  | Angpt4/Br   |
| GO_BP_m2GO:00331E regulation 7/470    | 273/23843 | 0.293902 | 0.57487  | 0.53821  | Bmp4/Ect2   |
| GO_BP_m2GO:00425E myelinatio 4/470    | 139/23843 | 0.293979 | 0.57487  | 0.53821  | Adgrg6/Fa   |
| GO_BP_m2GO:004544fat cell diff 6/470  | 228/23843 | 0.294807 | 0.57487  | 0.53821  | Cebpa/Gdf   |
| GO_BP_m2GO:009719extrinsic a 6/470    | 228/23843 | 0.294807 | 0.57487  | 0.53821  | Bloc1s2/Bn  |
| GO_BP_m2GO:000686lipid transp 8/470   | 319/23843 | 0.29482  | 0.57487  | 0.53821  | Acat2/Acsl  |
| GO_BP_m2GO:00003E alternative 2/470   | 55/23843  | 0.295498 | 0.57487  | 0.53821  | Dyrk1a/Thr  |
| GO_BP_m2GO:004269ovulation c 2/470    | 55/23843  | 0.295498 | 0.57487  | 0.53821  | Gdf9/Sgpl1  |
| GO_BP_m2GO:00466C regulation 2/470    | 55/23843  | 0.295498 | 0.57487  | 0.53821  | Cep120/Ch   |
| GO_BP_m2GO:004853thymus de 2/470      | 55/23843  | 0.295498 | 0.57487  | 0.53821  | Mafb/Zbtb   |
| GO_BP_m2GO:00603E endochonc 2/470     | 55/23843  | 0.295498 | 0.57487  | 0.53821  | Bmp4/Col2   |
| GO_BP_m2GO:006197replacemer 2/470     | 55/23843  | 0.295498 | 0.57487  | 0.53821  | Bmp4/Col2   |
| GO_BP_m2GO:190307positive re 2/470    | 55/23843  | 0.295498 | 0.57487  | 0.53821  | Rack1/Rab   |
| GO_BP_m2GO:001567monovalen 11/470     | 459/23843 | 0.297428 | 0.57487  | 0.53821  | Agrn/Atf4/  |
| GO_BP_m2GO:000974response tr 5/470    | 184/23843 | 0.297725 | 0.57487  | 0.53821  | Glul/Rack1. |
| GO_BP_m2GO:005121cartilage de 5/470   | 184/23843 | 0.297725 | 0.57487  | 0.53821  | Bmp4/Col2   |
| GO_BP_m2GO:000662protein tar 4/470    | 140/23843 | 0.298401 | 0.57487  | 0.53821  | Pink1/Rac2  |
| GO_BP_m2GO:001821peptidyl-tf 4/470    | 140/23843 | 0.298401 | 0.57487  | 0.53821  | Cad/Clk1/L  |
| GO_BP_m2GO:00717C tumor necr 4/470    | 140/23843 | 0.298401 | 0.57487  | 0.53821  | Cybb/Mavs   |

|                                     |           |          |          |          |             |
|-------------------------------------|-----------|----------|----------|----------|-------------|
| GO_BP_m2GO:000193negative re10/470  | 413/23843 | 0.298968 | 0.57487  | 0.53821  | Bmp4/Csk/   |
| GO_BP_m2GO:000635DNA-temp3/470      | 97/23843  | 0.299238 | 0.57487  | 0.53821  | Cebpa/Psr   |
| GO_BP_m2GO:004605cAMP met3/470      | 97/23843  | 0.299238 | 0.57487  | 0.53821  | Rack1/Pde   |
| GO_BP_m2GO:006034bone mor3/470      | 97/23843  | 0.299238 | 0.57487  | 0.53821  | Bmp4/Col2   |
| GO_BP_m2GO:190307regulation 3/470   | 97/23843  | 0.299238 | 0.57487  | 0.53821  | Csk/Rack1/  |
| GO_BP_m2GO:000195positive re1/470   | 18/23843  | 0.301272 | 0.57487  | 0.53821  | Stxbp1      |
| GO_BP_m2GO:000207osteoblast 1/470   | 18/23843  | 0.301272 | 0.57487  | 0.53821  | Jund        |
| GO_BP_m2GO:000282positive re1/470   | 18/23843  | 0.301272 | 0.57487  | 0.53821  | Il12rb1     |
| GO_BP_m2GO:000305glomerular 1/470   | 18/23843  | 0.301272 | 0.57487  | 0.53821  | Sulf2       |
| GO_BP_m2GO:000612mitochond 1/470    | 18/23843  | 0.301272 | 0.57487  | 0.53821  | Pink1       |
| GO_BP_m2GO:000645N-glycan 1/470     | 18/23843  | 0.301272 | 0.57487  | 0.53821  | Prkcs       |
| GO_BP_m2GO:000739ectoderm 1/470     | 18/23843  | 0.301272 | 0.57487  | 0.53821  | Erf         |
| GO_BP_m2GO:003015protein im1/470    | 18/23843  | 0.301272 | 0.57487  | 0.53821  | Tomm20      |
| GO_BP_m2GO:00305Cnegative re1/470   | 18/23843  | 0.301272 | 0.57487  | 0.53821  | Ptk2b       |
| GO_BP_m2GO:00324Cestablishm1/470    | 18/23843  | 0.301272 | 0.57487  | 0.53821  | Rab11a      |
| GO_BP_m2GO:003316positive re1/470   | 18/23843  | 0.301272 | 0.57487  | 0.53821  | Mavs        |
| GO_BP_m2GO:003593corticoster1/470   | 18/23843  | 0.301272 | 0.57487  | 0.53821  | Cry1        |
| GO_BP_m2GO:003615outer dyne 1/470   | 18/23843  | 0.301272 | 0.57487  | 0.53821  | Mss51       |
| GO_BP_m2GO:003615inner dynei1/470   | 18/23843  | 0.301272 | 0.57487  | 0.53821  | Mss51       |
| GO_BP_m2GO:004003negative re1/470   | 18/23843  | 0.301272 | 0.57487  | 0.53821  | Sulf2       |
| GO_BP_m2GO:004221cellular mo1/470   | 18/23843  | 0.301272 | 0.57487  | 0.53821  | Pm20d2      |
| GO_BP_m2GO:004224establishm1/470    | 18/23843  | 0.301272 | 0.57487  | 0.53821  | Sfrp2       |
| GO_BP_m2GO:004277DNA dama1/470      | 18/23843  | 0.301272 | 0.57487  | 0.53821  | Pcbp4       |
| GO_BP_m2GO:004355regulation 1/470   | 18/23843  | 0.301272 | 0.57487  | 0.53821  | Slc35a4     |
| GO_BP_m2GO:004547locomotor 1/470    | 18/23843  | 0.301272 | 0.57487  | 0.53821  | Id2         |
| GO_BP_m2GO:004632positive re1/470   | 18/23843  | 0.301272 | 0.57487  | 0.53821  | Nr4a3       |
| GO_BP_m2GO:00516C histamine t1/470  | 18/23843  | 0.301272 | 0.57487  | 0.53821  | Csf2        |
| GO_BP_m2GO:00519C pigment gr1/470   | 18/23843  | 0.301272 | 0.57487  | 0.53821  | Rab11a      |
| GO_BP_m2GO:006023mesenchyr1/470     | 18/23843  | 0.301272 | 0.57487  | 0.53821  | Bmp4        |
| GO_BP_m2GO:006033regulation 1/470   | 18/23843  | 0.301272 | 0.57487  | 0.53821  | Mavs        |
| GO_BP_m2GO:006039regulation 1/470   | 18/23843  | 0.301272 | 0.57487  | 0.53821  | Bmp4        |
| GO_BP_m2GO:006057morphoge1/470      | 18/23843  | 0.301272 | 0.57487  | 0.53821  | Bmp4        |
| GO_BP_m2GO:00607C trophoblas1/470   | 18/23843  | 0.301272 | 0.57487  | 0.53821  | Erf         |
| GO_BP_m2GO:00718C regulation 1/470  | 18/23843  | 0.301272 | 0.57487  | 0.53821  | Csf2        |
| GO_BP_m2GO:007207renal vesicl1/470  | 18/23843  | 0.301272 | 0.57487  | 0.53821  | Bmp4        |
| GO_BP_m2GO:009002positive re1/470   | 18/23843  | 0.301272 | 0.57487  | 0.53821  | S100a14     |
| GO_BP_m2GO:009018negative re1/470   | 18/23843  | 0.301272 | 0.57487  | 0.53821  | Bmp4        |
| GO_BP_m2GO:009962ventricular 1/470  | 18/23843  | 0.301272 | 0.57487  | 0.53821  | Kcnh2       |
| GO_BP_m2GO:190101negative re1/470   | 18/23843  | 0.301272 | 0.57487  | 0.53821  | Agrn        |
| GO_BP_m2GO:190162regulation 1/470   | 18/23843  | 0.301272 | 0.57487  | 0.53821  | Ptk2b       |
| GO_BP_m2GO:19904Cembryonic 1/470    | 18/23843  | 0.301272 | 0.57487  | 0.53821  | Mir449b     |
| GO_BP_m2GO:001491positive re2/470   | 56/23843  | 0.3028   | 0.577057 | 0.540258 | Foxo4/Plau  |
| GO_BP_m2GO:006133cardiac cor2/470   | 56/23843  | 0.3028   | 0.577057 | 0.540258 | Kcnh2/Pde   |
| GO_BP_m2GO:005125negative re4/470   | 141/23843 | 0.302831 | 0.577057 | 0.540258 | Bmp4/Id2/   |
| GO_BP_m2GO:00345C protein loc 7/470 | 276/23843 | 0.303242 | 0.577577 | 0.540745 | Bmp4/Ect2   |
| GO_BP_m2GO:00301C natural kill3/470 | 98/23843  | 0.304629 | 0.579167 | 0.542234 | Id2/Ifna4/Z |
| GO_BP_m2GO:003079regulation 3/470   | 98/23843  | 0.304629 | 0.579167 | 0.542234 | Rack1/Pde   |
| GO_BP_m2GO:004642positive re3/470   | 98/23843  | 0.304629 | 0.579167 | 0.542234 | Csf2/Prl8a2 |

|                                                          |           |          |          |          |             |
|----------------------------------------------------------|-----------|----------|----------|----------|-------------|
| GO_BP_m2GO:009956chemical syn4/470                       | 98/23843  | 0.304629 | 0.579167 | 0.542234 | Mtmr2/Ptk   |
| GO_BP_m2GO:000727ensheathm4/470                          | 142/23843 | 0.307268 | 0.583657 | 0.546437 | Adgrg6/Fa   |
| GO_BP_m2GO:000836axon ensheathm4/470                     | 142/23843 | 0.307268 | 0.583657 | 0.546437 | Adgrg6/Fa   |
| GO_BP_m2GO:001605Wnt signaling10/470                     | 417/23843 | 0.309115 | 0.585364 | 0.548035 | Bambi/Dkk   |
| GO_BP_m2GO:003133positive regulation of cell cycle8/470  | 324/23843 | 0.309233 | 0.585364 | 0.548035 | Rack1/Met   |
| GO_BP_m2GO:000020protein synthesis5/470                  | 187/23843 | 0.309248 | 0.585364 | 0.548035 | Rnf146/Rnl  |
| GO_BP_m2GO:005122positive regulation of cell cycle11/470 | 464/23843 | 0.309436 | 0.585364 | 0.548035 | Ect2/Glul/R |
| GO_BP_m2GO:001580acidic amino acid transport2/470        | 57/23843  | 0.310089 | 0.585364 | 0.548035 | Grm7/Stxb   |
| GO_BP_m2GO:004311receptor signaling2/470                 | 57/23843  | 0.310089 | 0.585364 | 0.548035 | Agrn/lft122 |
| GO_BP_m2GO:005131metaphase2/470                          | 57/23843  | 0.310089 | 0.585364 | 0.548035 | Rab11a/Trc  |
| GO_BP_m2GO:200073regulation of cell cycle2/470           | 57/23843  | 0.310089 | 0.585364 | 0.548035 | Bmp4/Kdmr   |
| GO_BP_m2GO:004358ear development6/470                    | 233/23843 | 0.311952 | 0.585364 | 0.548035 | Bmp4/Ceb    |
| GO_BP_m2GO:000227myeloid leukemia5/470                   | 188/23843 | 0.313103 | 0.585364 | 0.548035 | Csf2/Jmjd6  |
| GO_BP_m2GO:003461response to stress5/470                 | 188/23843 | 0.313103 | 0.585364 | 0.548035 | Aff3/Cebp   |
| GO_BP_m2GO:007124cellular response to stress5/470        | 188/23843 | 0.313103 | 0.585364 | 0.548035 | Cebpa/Ect2  |
| GO_BP_m2GO:019873cell-cell signaling10/470               | 419/23843 | 0.31422  | 0.585364 | 0.548035 | Bambi/Dkk   |
| GO_BP_m2GO:000150cartilage development1/470              | 19/23843  | 0.315056 | 0.585364 | 0.548035 | Col2a1      |
| GO_BP_m2GO:000211store-operated calcium entry1/470       | 19/23843  | 0.315056 | 0.585364 | 0.548035 | Srl         |
| GO_BP_m2GO:000218cytoplasmic streaming1/470              | 19/23843  | 0.315056 | 0.585364 | 0.548035 | Eif5        |
| GO_BP_m2GO:000321cardiac left ventricle1/470             | 19/23843  | 0.315056 | 0.585364 | 0.548035 | Sfrp2       |
| GO_BP_m2GO:000321cardiac right ventricle1/470            | 19/23843  | 0.315056 | 0.585364 | 0.548035 | Chd7        |
| GO_BP_m2GO:000608lactate metabolism1/470                 | 19/23843  | 0.315056 | 0.585364 | 0.548035 | Pfkfb2      |
| GO_BP_m2GO:000610L-oxoglutarate1/470                     | 19/23843  | 0.315056 | 0.585364 | 0.548035 | Kyat3       |
| GO_BP_m2GO:000669bile acid biosynthesis1/470             | 19/23843  | 0.315056 | 0.585364 | 0.548035 | Slc27a2     |
| GO_BP_m2GO:000820androgen receptor signaling1/470        | 19/23843  | 0.315056 | 0.585364 | 0.548035 | Sgpl1       |
| GO_BP_m2GO:001084retina layer1/470                       | 19/23843  | 0.315056 | 0.585364 | 0.548035 | Ptpm        |
| GO_BP_m2GO:001608synaptic vesicle transport1/470         | 19/23843  | 0.315056 | 0.585364 | 0.548035 | Stxbp1      |
| GO_BP_m2GO:001824protein O-linked N-glycosylation1/470   | 19/23843  | 0.315056 | 0.585364 | 0.548035 | Galnt2      |
| GO_BP_m2GO:003282regulation of cell cycle1/470           | 19/23843  | 0.315056 | 0.585364 | 0.548035 | Zbtb1       |
| GO_BP_m2GO:003360positive regulation of cell cycle1/470  | 19/23843  | 0.315056 | 0.585364 | 0.548035 | Pink1       |
| GO_BP_m2GO:003469response to stress1/470                 | 19/23843  | 0.315056 | 0.585364 | 0.548035 | Acaca       |
| GO_BP_m2GO:003549SNARE complex assembly1/470             | 19/23843  | 0.315056 | 0.585364 | 0.548035 | Vamp3       |
| GO_BP_m2GO:003601protein localization1/470               | 19/23843  | 0.315056 | 0.585364 | 0.548035 | Tollip      |
| GO_BP_m2GO:004564regulation of cell cycle1/470           | 19/23843  | 0.315056 | 0.585364 | 0.548035 | Id2         |
| GO_BP_m2GO:005077negative regulation of cell cycle1/470  | 19/23843  | 0.315056 | 0.585364 | 0.548035 | Cit         |
| GO_BP_m2GO:005101barbed-end organization1/470            | 19/23843  | 0.315056 | 0.585364 | 0.548035 | Twf1        |
| GO_BP_m2GO:005138kinetochore organization1/470           | 19/23843  | 0.315056 | 0.585364 | 0.548035 | Trappc12    |
| GO_BP_m2GO:005190regulation of cell cycle1/470           | 19/23843  | 0.315056 | 0.585364 | 0.548035 | Rack1       |
| GO_BP_m2GO:005190establishment of cell cycle1/470        | 19/23843  | 0.315056 | 0.585364 | 0.548035 | Rab11a      |
| GO_BP_m2GO:006029cilium movement1/470                    | 19/23843  | 0.315056 | 0.585364 | 0.548035 | Cfap46      |
| GO_BP_m2GO:006048positive regulation of cell cycle1/470  | 19/23843  | 0.315056 | 0.585364 | 0.548035 | Acat2       |
| GO_BP_m2GO:006078ectoderm development1/470               | 19/23843  | 0.315056 | 0.585364 | 0.548035 | Dkk4        |
| GO_BP_m2GO:007142rRNA-containing body1/470               | 19/23843  | 0.315056 | 0.585364 | 0.548035 | Ran         |
| GO_BP_m2GO:007169ectoderm development1/470               | 19/23843  | 0.315056 | 0.585364 | 0.548035 | Dkk4        |
| GO_BP_m2GO:009720renal filtration1/470                   | 19/23843  | 0.315056 | 0.585364 | 0.548035 | Sulf2       |
| GO_BP_m2GO:190042regulation of cell cycle1/470           | 19/23843  | 0.315056 | 0.585364 | 0.548035 | Syt11       |
| GO_BP_m2GO:190527regulation of cell cycle1/470           | 19/23843  | 0.315056 | 0.585364 | 0.548035 | Sfrp2       |
| GO_BP_m2GO:190533negative regulation of cell cycle1/470  | 19/23843  | 0.315056 | 0.585364 | 0.548035 | Bmp4        |

|                                      |           |          |          |          |              |
|--------------------------------------|-----------|----------|----------|----------|--------------|
| GO_BP_m2GO:200001positive reç1/470   | 19/23843  | 0.315056 | 0.585364 | 0.548035 | Gpd1l        |
| GO_BP_m2GO:20001çregulation 1/470    | 19/23843  | 0.315056 | 0.585364 | 0.548035 | Bmp4         |
| GO_BP_m2GO:20001çpositive reç1/470   | 19/23843  | 0.315056 | 0.585364 | 0.548035 | Erfe         |
| GO_BP_m2GO:00094çresponse trç3/470   | 100/23843 | 0.315421 | 0.585364 | 0.548035 | Slc52a3/Tg   |
| GO_BP_m2GO:006007regulation 3/470    | 100/23843 | 0.315421 | 0.585364 | 0.548035 | Mtmr2/Ptk    |
| GO_BP_m2GO:19048çpositive reç3/470   | 100/23843 | 0.315421 | 0.585364 | 0.548035 | Csf2/Prl8aç  |
| GO_BP_m2GO:19052çpositive reç3/470   | 100/23843 | 0.315421 | 0.585364 | 0.548035 | Auts2/Pink   |
| GO_BP_m2GO:00604çcalcium iorç4/470   | 144/23843 | 0.316162 | 0.586479 | 0.54908  | Bmp4/Chd     |
| GO_BP_m2GO:00028çregulation 2/470    | 58/23843  | 0.317362 | 0.587148 | 0.549705 | Rac2/Stxbç   |
| GO_BP_m2GO:00063çDNA-tempç2/470      | 58/23843  | 0.317362 | 0.587148 | 0.549705 | Ell/Eloa     |
| GO_BP_m2GO:000644regulation 2/470    | 58/23843  | 0.317362 | 0.587148 | 0.549705 | Eif5/Ncbp2   |
| GO_BP_m2GO:19023çregulation 2/470    | 58/23843  | 0.317362 | 0.587148 | 0.549705 | Agrn/Gpd1    |
| GO_BP_m2GO:19037çpositive reç2/470   | 58/23843  | 0.317362 | 0.587148 | 0.549705 | Erfe/Stxbç   |
| GO_BP_m2GO:19043çregulation 2/470    | 58/23843  | 0.317362 | 0.587148 | 0.549705 | Aurkb/Hnri   |
| GO_BP_m2GO:00302çbone mine ç3/470    | 101/23843 | 0.320821 | 0.593024 | 0.555207 | Bmp4/Nbrç    |
| GO_BP_m2GO:00519çregulation 3/470    | 101/23843 | 0.320821 | 0.593024 | 0.555207 | Grm7/Pink    |
| GO_BP_m2GO:000301muscle sysç9/470    | 375/23843 | 0.321751 | 0.594481 | 0.556571 | Agrn/Gpd1    |
| GO_BP_m2GO:00510çpositive reç6/470   | 236/23843 | 0.322317 | 0.595266 | 0.557305 | Aurkb/Bmç    |
| GO_BP_m2GO:00066çphosphatic2/470     | 59/23843  | 0.324617 | 0.59657  | 0.558527 | Cdipt/Pigr   |
| GO_BP_m2GO:00193çarachidonic2/470    | 59/23843  | 0.324617 | 0.59657  | 0.558527 | Cyp2g1/Fa    |
| GO_BP_m2GO:003051negative re2/470    | 59/23843  | 0.324617 | 0.59657  | 0.558527 | Bambi/Tgft   |
| GO_BP_m2GO:00456çnegative re2/470    | 59/23843  | 0.324617 | 0.59657  | 0.558527 | Id2/Nbr1     |
| GO_BP_m2GO:00603çface develç2/470    | 59/23843  | 0.324617 | 0.59657  | 0.558527 | Chd7/Sgplç   |
| GO_BP_m2GO:190351mucopolys 2/470     | 59/23843  | 0.324617 | 0.59657  | 0.558527 | Chst12/Chç   |
| GO_BP_m2GO:000751skeletal muç5/470   | 191/23843 | 0.324705 | 0.59657  | 0.558527 | Klhl41/Tll2ç |
| GO_BP_m2GO:19037çnegative re4/470    | 146/23843 | 0.325077 | 0.59657  | 0.558527 | Bmp4/Id2ç    |
| GO_BP_m2GO:00069çmuscle corç7/470    | 283/23843 | 0.325256 | 0.59657  | 0.558527 | Agrn/Gpd1    |
| GO_BP_m2GO:003241regulation 6/470    | 237/23843 | 0.325784 | 0.59657  | 0.558527 | Agrn/Bmpç    |
| GO_BP_m2GO:00070çvacuolar acç1/470   | 20/23843  | 0.328569 | 0.59657  | 0.558527 | Atp6v1h      |
| GO_BP_m2GO:00157çprostaglanç1/470    | 20/23843  | 0.328569 | 0.59657  | 0.558527 | Acsl4        |
| GO_BP_m2GO:00161çglycoside rç1/470   | 20/23843  | 0.328569 | 0.59657  | 0.558527 | Gba2         |
| GO_BP_m2GO:00164çpeptide hoç1/470    | 20/23843  | 0.328569 | 0.59657  | 0.558527 | Pcsk2        |
| GO_BP_m2GO:001824protein O- ç1/470   | 20/23843  | 0.328569 | 0.59657  | 0.558527 | Galnt2       |
| GO_BP_m2GO:003054female genç1/470    | 20/23843  | 0.328569 | 0.59657  | 0.558527 | Chd7         |
| GO_BP_m2GO:00310çpositive reç1/470   | 20/23843  | 0.328569 | 0.59657  | 0.558527 | Pink1        |
| GO_BP_m2GO:003164negative reç1/470   | 20/23843  | 0.328569 | 0.59657  | 0.558527 | Mtmr2        |
| GO_BP_m2GO:00322çmyelin assç1/470    | 20/23843  | 0.328569 | 0.59657  | 0.558527 | Mtmr2        |
| GO_BP_m2GO:00323çregulation 1/470    | 20/23843  | 0.328569 | 0.59657  | 0.558527 | Acsl4        |
| GO_BP_m2GO:00323çpositive reç1/470   | 20/23843  | 0.328569 | 0.59657  | 0.558527 | Gdf6         |
| GO_BP_m2GO:00326çnegative reç1/470   | 20/23843  | 0.328569 | 0.59657  | 0.558527 | Suz12        |
| GO_BP_m2GO:00427çfibrinolysis 1/470  | 20/23843  | 0.328569 | 0.59657  | 0.558527 | Plau         |
| GO_BP_m2GO:004301myeloid deç1/470    | 20/23843  | 0.328569 | 0.59657  | 0.558527 | Csf2         |
| GO_BP_m2GO:00439çhistone H4 ç1/470   | 20/23843  | 0.328569 | 0.59657  | 0.558527 | Auts2        |
| GO_BP_m2GO:00485çembryonic ç1/470    | 20/23843  | 0.328569 | 0.59657  | 0.558527 | Id2          |
| GO_BP_m2GO:00613çcell proliferç1/470 | 20/23843  | 0.328569 | 0.59657  | 0.558527 | Bmp4         |
| GO_BP_m2GO:00701çnegative reç1/470   | 20/23843  | 0.328569 | 0.59657  | 0.558527 | Ptk2b        |
| GO_BP_m2GO:00706çtransepitheç1/470   | 20/23843  | 0.328569 | 0.59657  | 0.558527 | Csf2         |
| GO_BP_m2GO:00716çectoderma ç1/470    | 20/23843  | 0.328569 | 0.59657  | 0.558527 | Dkk4         |

|                                            |           |          |          |          |             |
|--------------------------------------------|-----------|----------|----------|----------|-------------|
| GO_BP_m2GO:007208renal vesicle1/470        | 20/23843  | 0.328569 | 0.59657  | 0.558527 | Bmp4        |
| GO_BP_m2GO:009038phagosome1/470            | 20/23843  | 0.328569 | 0.59657  | 0.558527 | Syt11       |
| GO_BP_m2GO:009874cell aggregation1/470     | 20/23843  | 0.328569 | 0.59657  | 0.558527 | Col2a1      |
| GO_BP_m2GO:009878response to1/470          | 20/23843  | 0.328569 | 0.59657  | 0.558527 | Pink1       |
| GO_BP_m2GO:009962regulation 1/470          | 20/23843  | 0.328569 | 0.59657  | 0.558527 | Kcnh2       |
| GO_BP_m2GO:009963protein transport1/470    | 20/23843  | 0.328569 | 0.59657  | 0.558527 | Rab11a      |
| GO_BP_m2GO:009963neurotransmission1/470    | 20/23843  | 0.328569 | 0.59657  | 0.558527 | Rab11a      |
| GO_BP_m2GO:199012retrograde transport1/470 | 20/23843  | 0.328569 | 0.59657  | 0.558527 | Rab11a      |
| GO_BP_m2GO:200011regulation 1/470          | 20/23843  | 0.328569 | 0.59657  | 0.558527 | Ptk2b       |
| GO_BP_m2GO:005159response to3/470          | 103/23843 | 0.331621 | 0.601304 | 0.562959 | Ect2/Fosb/  |
| GO_BP_m2GO:001061regulation 2/470          | 60/23843  | 0.331852 | 0.601304 | 0.562959 | Nr4a3/Twfr  |
| GO_BP_m2GO:003033DNA damage2/470           | 60/23843  | 0.331852 | 0.601304 | 0.562959 | Dyrk1a/Pctk |
| GO_BP_m2GO:00359Caorta development2/470    | 60/23843  | 0.331852 | 0.601304 | 0.562959 | Ap2b1/Chc   |
| GO_BP_m2GO:000166response to5/470          | 193/23843 | 0.332465 | 0.601304 | 0.562959 | Cybb/Pink1  |
| GO_BP_m2GO:001589drug transport5/470       | 193/23843 | 0.332465 | 0.601304 | 0.562959 | Gdf9/Pink1  |
| GO_BP_m2GO:005165establishment5/470        | 193/23843 | 0.332465 | 0.601304 | 0.562959 | Bloc1s2/Cp  |
| GO_BP_m2GO:00550C muscle cell5/470         | 193/23843 | 0.332465 | 0.601304 | 0.562959 | Bmp4/Klhlk  |
| GO_BP_m2GO:190305regulation 5/470          | 193/23843 | 0.332465 | 0.601304 | 0.562959 | Alad/Rack1  |
| GO_BP_m2GO:005104negative regulation6/470  | 239/23843 | 0.332732 | 0.601526 | 0.563167 | Acsl4/Cry1. |
| GO_BP_m2GO:00069C vesicle fusion4/470      | 148/23843 | 0.334008 | 0.603574 | 0.565084 | Snph/Stxbp  |
| GO_BP_m2GO:000165urogenital 8/470          | 333/23843 | 0.335527 | 0.604152 | 0.565625 | Bmp4/Id2/   |
| GO_BP_m2GO:003103actomyosin5/470           | 194/23843 | 0.336352 | 0.604152 | 0.565625 | Alkbh4/Frn  |
| GO_BP_m2GO:009031positive regulation5/470  | 194/23843 | 0.336352 | 0.604152 | 0.565625 | Ect2/Mavsr  |
| GO_BP_m2GO:005127negative regulation7/470  | 287/23843 | 0.33795  | 0.604152 | 0.565625 | Angpt4/Ar   |
| GO_BP_m2GO:190316regulation 4/470          | 149/23843 | 0.338478 | 0.604152 | 0.565625 | Bmp4/Chd    |
| GO_BP_m2GO:190495positive regulation11/470 | 476/23843 | 0.338712 | 0.604152 | 0.565625 | Ect2/Glul/R |
| GO_BP_m2GO:000322ventricular 2/470         | 61/23843  | 0.339065 | 0.604152 | 0.565625 | Chd7/Id2    |
| GO_BP_m2GO:001017body morphology2/470      | 61/23843  | 0.339065 | 0.604152 | 0.565625 | Ift122/Sgpl |
| GO_BP_m2GO:001623positive regulation2/470  | 61/23843  | 0.339065 | 0.604152 | 0.565625 | Pink1/Ralb  |
| GO_BP_m2GO:003085positive regulation2/470  | 61/23843  | 0.339065 | 0.604152 | 0.565625 | Bmp4/Foxa   |
| GO_BP_m2GO:004566regulation 2/470          | 61/23843  | 0.339065 | 0.604152 | 0.565625 | Bmp4/Klhlk  |
| GO_BP_m2GO:005077negative regulation2/470  | 61/23843  | 0.339065 | 0.604152 | 0.565625 | Rnf6/Spg2l  |
| GO_BP_m2GO:009055regulation 2/470          | 61/23843  | 0.339065 | 0.604152 | 0.565625 | Bloc1s2/He  |
| GO_BP_m2GO:190305negative regulation2/470  | 61/23843  | 0.339065 | 0.604152 | 0.565625 | Alad/Ube2   |
| GO_BP_m2GO:190384negative regulation2/470  | 61/23843  | 0.339065 | 0.604152 | 0.565625 | Bambi/Tgfl  |
| GO_BP_m2GO:190437positive regulation2/470  | 61/23843  | 0.339065 | 0.604152 | 0.565625 | Rack1/Rab   |
| GO_BP_m2GO:200102negative regulation2/470  | 61/23843  | 0.339065 | 0.604152 | 0.565625 | Dyrk1a/Pctk |
| GO_BP_m2GO:200125positive regulation2/470  | 61/23843  | 0.339065 | 0.604152 | 0.565625 | Bmp4/Pink   |
| GO_BP_m2GO:003367negative regulation6/470  | 241/23843 | 0.339698 | 0.604152 | 0.565625 | Bmp4/Csk/   |
| GO_BP_m2GO:004642regulation 5/470          | 195/23843 | 0.340243 | 0.604152 | 0.565625 | Csf2/Ifna4/ |
| GO_BP_m2GO:000042mitophagy1/470            | 21/23843  | 0.341815 | 0.604152 | 0.565625 | Pink1       |
| GO_BP_m2GO:000046maturation1/470           | 21/23843  | 0.341815 | 0.604152 | 0.565625 | Exosc2      |
| GO_BP_m2GO:000208regulation 1/470          | 21/23843  | 0.341815 | 0.604152 | 0.565625 | Pink1       |
| GO_BP_m2GO:000332type B panicle1/470       | 21/23843  | 0.341815 | 0.604152 | 0.565625 | Bmp4        |
| GO_BP_m2GO:001066epithelial stem1/470      | 21/23843  | 0.341815 | 0.604152 | 0.565625 | Crocc       |
| GO_BP_m2GO:001074regulation 1/470          | 21/23843  | 0.341815 | 0.604152 | 0.565625 | Csf2        |
| GO_BP_m2GO:001655mRNA metabolism1/470      | 21/23843  | 0.341815 | 0.604152 | 0.565625 | Mettl14     |
| GO_BP_m2GO:001812protein hcylation1/470    | 21/23843  | 0.341815 | 0.604152 | 0.565625 | Jmjd6       |



|                                      |           |          |          |          |              |
|--------------------------------------|-----------|----------|----------|----------|--------------|
| GO_BP_m2GO:001932hexose cat:1/470    | 21/23843  | 0.341815 | 0.604152 | 0.565625 | Pfkfb2       |
| GO_BP_m2GO:003129retinal gan:1/470   | 21/23843  | 0.341815 | 0.604152 | 0.565625 | Ptprm        |
| GO_BP_m2GO:003233negative re:1/470   | 21/23843  | 0.341815 | 0.604152 | 0.565625 | Bmp4         |
| GO_BP_m2GO:003240melanoson:1/470     | 21/23843  | 0.341815 | 0.604152 | 0.565625 | Rab11a       |
| GO_BP_m2GO:003246regulation 1/470    | 21/23843  | 0.341815 | 0.604152 | 0.565625 | Rack1        |
| GO_BP_m2GO:003296positive re:1/470   | 21/23843  | 0.341815 | 0.604152 | 0.565625 | Eil          |
| GO_BP_m2GO:003300positive re:1/470   | 21/23843  | 0.341815 | 0.604152 | 0.565625 | Stxbp1       |
| GO_BP_m2GO:003362integrin ac:1/470   | 21/23843  | 0.341815 | 0.604152 | 0.565625 | Farp2        |
| GO_BP_m2GO:003438low-densit:1/470    | 21/23843  | 0.341815 | 0.604152 | 0.565625 | Csk          |
| GO_BP_m2GO:003469response tr:1/470   | 21/23843  | 0.341815 | 0.604152 | 0.565625 | Acaca        |
| GO_BP_m2GO:003952cytoplasmic:1/470   | 21/23843  | 0.341815 | 0.604152 | 0.565625 | Mavs         |
| GO_BP_m2GO:004330positive re:1/470   | 21/23843  | 0.341815 | 0.604152 | 0.565625 | Stxbp1       |
| GO_BP_m2GO:004568negative re:1/470   | 21/23843  | 0.341815 | 0.604152 | 0.565625 | Dkk4         |
| GO_BP_m2GO:004613pyrimidine 1/470    | 21/23843  | 0.341815 | 0.604152 | 0.565625 | Cad          |
| GO_BP_m2GO:004632negative re:1/470   | 21/23843  | 0.341815 | 0.604152 | 0.565625 | Upk3b        |
| GO_BP_m2GO:004668response tr:1/470   | 21/23843  | 0.341815 | 0.604152 | 0.565625 | Alad         |
| GO_BP_m2GO:004802positive re:1/470   | 21/23843  | 0.341815 | 0.604152 | 0.565625 | Thrap3       |
| GO_BP_m2GO:005123sequesterir:1/470   | 21/23843  | 0.341815 | 0.604152 | 0.565625 | Fthl17f      |
| GO_BP_m2GO:005145myoblast p:1/470    | 21/23843  | 0.341815 | 0.604152 | 0.565625 | Klhl41       |
| GO_BP_m2GO:007084inclusion b:1/470   | 21/23843  | 0.341815 | 0.604152 | 0.565625 | Psmc5        |
| GO_BP_m2GO:007086regulation 1/470    | 21/23843  | 0.341815 | 0.604152 | 0.565625 | Ube2j1       |
| GO_BP_m2GO:007211cell prolifer:1/470 | 21/23843  | 0.341815 | 0.604152 | 0.565625 | Bmp4         |
| GO_BP_m2GO:009706dendritic s:1/470   | 21/23843  | 0.341815 | 0.604152 | 0.565625 | Mtmr2        |
| GO_BP_m2GO:190174positive re:1/470   | 21/23843  | 0.341815 | 0.604152 | 0.565625 | Cd53         |
| GO_BP_m2GO:001050positive re:3/470   | 105/23843 | 0.342416 | 0.604196 | 0.565666 | Pink1/Ralb.  |
| GO_BP_m2GO:001583amine tran:3/470    | 105/23843 | 0.342416 | 0.604196 | 0.565666 | Grm7/Pink.   |
| GO_BP_m2GO:190437regulation 3/470    | 105/23843 | 0.342416 | 0.604196 | 0.565666 | Csk/Rack1/   |
| GO_BP_m2GO:200017regulation 3/470    | 105/23843 | 0.342416 | 0.604196 | 0.565666 | Id2/Six3/Va  |
| GO_BP_m2GO:004873cardiac mu:6/470    | 242/23843 | 0.343187 | 0.605301 | 0.566701 | Bmp4/Chd     |
| GO_BP_m2GO:001715regulation 5/470    | 196/23843 | 0.344137 | 0.606467 | 0.567793 | Rac2/Ralb/   |
| GO_BP_m2GO:006034bone devel:5/470    | 196/23843 | 0.344137 | 0.606467 | 0.567793 | Bmp4/Col2    |
| GO_BP_m2GO:000754sex differer:7/470  | 289/23843 | 0.344323 | 0.606541 | 0.567862 | Bmp4/Chd     |
| GO_BP_m2GO:000636transcriptic:2/470  | 62/23843  | 0.346253 | 0.608154 | 0.569372 | Psmc5/Thr.   |
| GO_BP_m2GO:001474regulation 2/470    | 62/23843  | 0.346253 | 0.608154 | 0.569372 | Nr4a3/Twf.   |
| GO_BP_m2GO:002169cerebellar c:2/470  | 62/23843  | 0.346253 | 0.608154 | 0.569372 | Coq8b/Fair   |
| GO_BP_m2GO:003112cytoplasmic:2/470   | 62/23843  | 0.346253 | 0.608154 | 0.569372 | Cep120/Ra    |
| GO_BP_m2GO:004205regulation 2/470    | 62/23843  | 0.346253 | 0.608154 | 0.569372 | Aplp2/Tsg1   |
| GO_BP_m2GO:005186protein aut:2/470   | 62/23843  | 0.346253 | 0.608154 | 0.569372 | Rnf146/Rnl   |
| GO_BP_m2GO:006103regulation 2/470    | 62/23843  | 0.346253 | 0.608154 | 0.569372 | Bmp4/Gdf6    |
| GO_BP_m2GO:002289regulation 6/470    | 243/23843 | 0.346679 | 0.608646 | 0.569833 | Agrn/Bmp4    |
| GO_BP_m2GO:003200regulation 3/470    | 106/23843 | 0.347809 | 0.60961  | 0.570735 | Gatsl2/lftg. |
| GO_BP_m2GO:004353blood vess:3/470    | 106/23843 | 0.347809 | 0.60961  | 0.570735 | Angpt4/Pd    |
| GO_BP_m2GO:005120release of c:3/470  | 106/23843 | 0.347809 | 0.60961  | 0.570735 | Chd7/Pde4    |
| GO_BP_m2GO:005128negative re:3/470   | 106/23843 | 0.347809 | 0.60961  | 0.570735 | Chd7/Pde4    |
| GO_BP_m2GO:190489regulation 5/470    | 197/23843 | 0.348034 | 0.609749 | 0.570866 | Csf2/lfn4/   |
| GO_BP_m2GO:003253regulation 9/470    | 385/23843 | 0.349255 | 0.610392 | 0.571467 | Chmp3/Cit    |
| GO_BP_m2GO:003214activation c:6/470  | 244/23843 | 0.350175 | 0.610392 | 0.571467 | Bmp4/Cks1    |
| GO_BP_m2GO:004209T cell prolif:5/470 | 198/23843 | 0.351933 | 0.610392 | 0.571467 | Bmp4/Il12r   |

|                                     |           |          |          |          |             |
|-------------------------------------|-----------|----------|----------|----------|-------------|
| GO_BP_m2GO:000007DNA dama3/470      | 107/23843 | 0.353197 | 0.610392 | 0.571467 | Cdc5l/Cry1  |
| GO_BP_m2GO:005122spindle ass 3/470  | 107/23843 | 0.353197 | 0.610392 | 0.571467 | Aurkb/Rab   |
| GO_BP_m2GO:005128regulation 3/470   | 107/23843 | 0.353197 | 0.610392 | 0.571467 | Chd7/Pde4   |
| GO_BP_m2GO:000998cell-cell rec2/470 | 63/23843  | 0.353416 | 0.610392 | 0.571467 | Izumo1r/Zf  |
| GO_BP_m2GO:00346Ccellular res2/470  | 63/23843  | 0.353416 | 0.610392 | 0.571467 | Slc52a3/Zf  |
| GO_BP_m2GO:00973Ccellular res2/470  | 63/23843  | 0.353416 | 0.610392 | 0.571467 | Acaca/Mir3  |
| GO_BP_m2GO:19016Calpha-amir2/470    | 63/23843  | 0.353416 | 0.610392 | 0.571467 | Cad/Glul    |
| GO_BP_m2GO:003009myeloid ce9/470    | 387/23843 | 0.354799 | 0.610392 | 0.571467 | Bmp4/Ceb    |
| GO_BP_m2GO:000002ribosomal s1/470   | 22/23843  | 0.354801 | 0.610392 | 0.571467 | Pwp2        |
| GO_BP_m2GO:000853respiratory 1/470  | 22/23843  | 0.354801 | 0.610392 | 0.571467 | Cox10       |
| GO_BP_m2GO:001097positive rec1/470  | 22/23843  | 0.354801 | 0.610392 | 0.571467 | Rab11a      |
| GO_BP_m2GO:001485response tr1/470   | 22/23843  | 0.354801 | 0.610392 | 0.571467 | Srl         |
| GO_BP_m2GO:003272positive rec1/470  | 22/23843  | 0.354801 | 0.610392 | 0.571467 | Mavs        |
| GO_BP_m2GO:00344Cresponse tr1/470   | 22/23843  | 0.354801 | 0.610392 | 0.571467 | Ptk2b       |
| GO_BP_m2GO:003502negative re1/470   | 22/23843  | 0.354801 | 0.610392 | 0.571467 | Arap3       |
| GO_BP_m2GO:003563response tr1/470   | 22/23843  | 0.354801 | 0.610392 | 0.571467 | Fgl1        |
| GO_BP_m2GO:004253benzene-c 1/470    | 22/23843  | 0.354801 | 0.610392 | 0.571467 | Kyat3       |
| GO_BP_m2GO:004348histone exc1/470   | 22/23843  | 0.354801 | 0.610392 | 0.571467 | Vps72       |
| GO_BP_m2GO:004349regulation 1/470   | 22/23843  | 0.354801 | 0.610392 | 0.571467 | Pcbd1       |
| GO_BP_m2GO:00456Cpositive rec1/470  | 22/23843  | 0.354801 | 0.610392 | 0.571467 | Bmp4        |
| GO_BP_m2GO:004581positive rec1/470  | 22/23843  | 0.354801 | 0.610392 | 0.571467 | Smarcd1     |
| GO_BP_m2GO:004594positive rec1/470  | 22/23843  | 0.354801 | 0.610392 | 0.571467 | Atf4        |
| GO_BP_m2GO:005179regulation 1/470   | 22/23843  | 0.354801 | 0.610392 | 0.571467 | Dkk4        |
| GO_BP_m2GO:005187pigment gr1/470    | 22/23843  | 0.354801 | 0.610392 | 0.571467 | Rab11a      |
| GO_BP_m2GO:005188mitochond 1/470    | 22/23843  | 0.354801 | 0.610392 | 0.571467 | Rack1       |
| GO_BP_m2GO:006026positive rec1/470  | 22/23843  | 0.354801 | 0.610392 | 0.571467 | Psmc5       |
| GO_BP_m2GO:006043trachea de1/470    | 22/23843  | 0.354801 | 0.610392 | 0.571467 | Bmp4        |
| GO_BP_m2GO:00606Cbranch elo1/470    | 22/23843  | 0.354801 | 0.610392 | 0.571467 | Bmp4        |
| GO_BP_m2GO:006074mammary 1/470      | 22/23843  | 0.354801 | 0.610392 | 0.571467 | Id2         |
| GO_BP_m2GO:006108myeloid let1/470   | 22/23843  | 0.354801 | 0.610392 | 0.571467 | Nr4a3       |
| GO_BP_m2GO:006137mammary 1/470      | 22/23843  | 0.354801 | 0.610392 | 0.571467 | Id2         |
| GO_BP_m2GO:007024thymocyte 1/470    | 22/23843  | 0.354801 | 0.610392 | 0.571467 | Bmp4        |
| GO_BP_m2GO:007198multivesicu1/470   | 22/23843  | 0.354801 | 0.610392 | 0.571467 | Chmp3       |
| GO_BP_m2GO:007221regulation 1/470   | 22/23843  | 0.354801 | 0.610392 | 0.571467 | Bmp4        |
| GO_BP_m2GO:007227metaneph1/470      | 22/23843  | 0.354801 | 0.610392 | 0.571467 | Bmp4        |
| GO_BP_m2GO:190074positive rec1/470  | 22/23843  | 0.354801 | 0.610392 | 0.571467 | Gdf6        |
| GO_BP_m2GO:190153regulation 1/470   | 22/23843  | 0.354801 | 0.610392 | 0.571467 | Zbtb1       |
| GO_BP_m2GO:190165glycosyl co 1/470  | 22/23843  | 0.354801 | 0.610392 | 0.571467 | Gba2        |
| GO_BP_m2GO:200063positive rec1/470  | 22/23843  | 0.354801 | 0.610392 | 0.571467 | Bmp4        |
| GO_BP_m2GO:200073positive rec1/470  | 22/23843  | 0.354801 | 0.610392 | 0.571467 | Bmp4        |
| GO_BP_m2GO:200076regulation 1/470   | 22/23843  | 0.354801 | 0.610392 | 0.571467 | Unk         |
| GO_BP_m2GO:000815actin polyn5/470   | 199/23843 | 0.355835 | 0.611669 | 0.572662 | Cit/Ptk2b/F |
| GO_BP_m2GO:003052intracellula 5/470 | 199/23843 | 0.355835 | 0.611669 | 0.572662 | Cry1/Kdm3   |
| GO_BP_m2GO:007189DNA biosy4/470     | 153/23843 | 0.356373 | 0.612343 | 0.573294 | Aurkb/Hnri  |
| GO_BP_m2GO:004586positive rec10/470 | 436/23843 | 0.358281 | 0.615127 | 0.575901 | Agrn/Bmp4   |
| GO_BP_m2GO:000184neural tub3/470    | 108/23843 | 0.35858  | 0.615127 | 0.575901 | Bmp4/lft12  |
| GO_BP_m2GO:00512Csequesterir 3/470  | 108/23843 | 0.35858  | 0.615127 | 0.575901 | Chd7/Pde4   |
| GO_BP_m2GO:200027regulation 3/470   | 108/23843 | 0.35858  | 0.615127 | 0.575901 | Aurkb/Hnri  |

|                                |        |           |          |          |          |              |
|--------------------------------|--------|-----------|----------|----------|----------|--------------|
| GO_BP_m2GO:006053skeletal mu   | 5/470  | 200/23843 | 0.359738 | 0.616744 | 0.577414 | Klh141/Tll2/ |
| GO_BP_m2GO:000756embryo im     | 2/470  | 64/23843  | 0.360551 | 0.616744 | 0.577414 | H3f3b/Ooe    |
| GO_BP_m2GO:002176hippocamp     | 2/470  | 64/23843  | 0.360551 | 0.616744 | 0.577414 | Nr4a3/Zbt    |
| GO_BP_m2GO:003237positive re   | 2/470  | 64/23843  | 0.360551 | 0.616744 | 0.577414 | Acat2/Erfe   |
| GO_BP_m2GO:004682positive re   | 2/470  | 64/23843  | 0.360551 | 0.616744 | 0.577414 | Ect2/Mavs    |
| GO_BP_m2GO:004692regulation    | 2/470  | 64/23843  | 0.360551 | 0.616744 | 0.577414 | Cplx4/Stxb   |
| GO_BP_m2GO:004827vesicle doc   | 2/470  | 64/23843  | 0.360551 | 0.616744 | 0.577414 | Ralb/Stxbp   |
| GO_BP_m2GO:000691phagocyto     | 4/470  | 154/23843 | 0.360848 | 0.617    | 0.577653 | Ighv1-23/I   |
| GO_BP_m2GO:004863positive re   | 5/470  | 201/23843 | 0.363643 | 0.619612 | 0.5801   | Agrn/Chd7    |
| GO_BP_m2GO:006060tube closur   | 3/470  | 109/23843 | 0.363957 | 0.619612 | 0.5801   | Bmp4/Ift12   |
| GO_BP_m2GO:007162granulocyti   | 3/470  | 109/23843 | 0.363957 | 0.619612 | 0.5801   | Pde4d/Rac    |
| GO_BP_m2GO:190533regulation    | 3/470  | 109/23843 | 0.363957 | 0.619612 | 0.5801   | Bmp4/Fkbr    |
| GO_BP_m2GO:200010regulation    | 3/470  | 109/23843 | 0.363957 | 0.619612 | 0.5801   | Aurkb/Bmp    |
| GO_BP_m2GO:005082protein sta   | 4/470  | 155/23843 | 0.365321 | 0.619612 | 0.5801   | Pdcd10/Pir   |
| GO_BP_m2GO:007265establishm    | 4/470  | 155/23843 | 0.365321 | 0.619612 | 0.5801   | Pink1/Rac2   |
| GO_BP_m2GO:190353positive re   | 10/470 | 439/23843 | 0.366154 | 0.619612 | 0.5801   | Glul/Mavs/   |
| GO_BP_m2GO:000290negative re   | 1/470  | 23/23843  | 0.367531 | 0.619612 | 0.5801   | Aurkb        |
| GO_BP_m2GO:003020chondroitir   | 1/470  | 23/23843  | 0.367531 | 0.619612 | 0.5801   | Chst12       |
| GO_BP_m2GO:003090notochord     | 1/470  | 23/23843  | 0.367531 | 0.619612 | 0.5801   | Col2a1       |
| GO_BP_m2GO:003237positive re   | 1/470  | 23/23843  | 0.367531 | 0.619612 | 0.5801   | Acat2        |
| GO_BP_m2GO:003237positive re   | 1/470  | 23/23843  | 0.367531 | 0.619612 | 0.5801   | Acat2        |
| GO_BP_m2GO:003246positive re   | 1/470  | 23/23843  | 0.367531 | 0.619612 | 0.5801   | Rack1        |
| GO_BP_m2GO:003410negative re   | 1/470  | 23/23843  | 0.367531 | 0.619612 | 0.5801   | Csk          |
| GO_BP_m2GO:003431diol metab    | 1/470  | 23/23843  | 0.367531 | 0.619612 | 0.5801   | Pcbd1        |
| GO_BP_m2GO:003439smooth mi     | 1/470  | 23/23843  | 0.367531 | 0.619612 | 0.5801   | Pde1a        |
| GO_BP_m2GO:003439regulation    | 1/470  | 23/23843  | 0.367531 | 0.619612 | 0.5801   | Pde1a        |
| GO_BP_m2GO:003540histone-se    | 1/470  | 23/23843  | 0.367531 | 0.619612 | 0.5801   | Aurkb        |
| GO_BP_m2GO:004204fluid trans   | 1/470  | 23/23843  | 0.367531 | 0.619612 | 0.5801   | Csf2         |
| GO_BP_m2GO:004240thyroid hor   | 1/470  | 23/23843  | 0.367531 | 0.619612 | 0.5801   | Crym         |
| GO_BP_m2GO:004573negative re   | 1/470  | 23/23843  | 0.367531 | 0.619612 | 0.5801   | Lats2        |
| GO_BP_m2GO:005130meiotic chr   | 1/470  | 23/23843  | 0.367531 | 0.619612 | 0.5801   | Espl1        |
| GO_BP_m2GO:006014positive re   | 1/470  | 23/23843  | 0.367531 | 0.619612 | 0.5801   | Bmp4         |
| GO_BP_m2GO:006097left/right p  | 1/470  | 23/23843  | 0.367531 | 0.619612 | 0.5801   | Ift122       |
| GO_BP_m2GO:007167positive re   | 1/470  | 23/23843  | 0.367531 | 0.619612 | 0.5801   | S100a14      |
| GO_BP_m2GO:007220cell differer | 1/470  | 23/23843  | 0.367531 | 0.619612 | 0.5801   | Bmp4         |
| GO_BP_m2GO:008971amino acid    | 1/470  | 23/23843  | 0.367531 | 0.619612 | 0.5801   | Slc25a38     |
| GO_BP_m2GO:009019positive re   | 1/470  | 23/23843  | 0.367531 | 0.619612 | 0.5801   | Bmp4         |
| GO_BP_m2GO:190307negative re   | 1/470  | 23/23843  | 0.367531 | 0.619612 | 0.5801   | Csk          |
| GO_BP_m2GO:190367negative re   | 1/470  | 23/23843  | 0.367531 | 0.619612 | 0.5801   | Pdcd10       |
| GO_BP_m2GO:000651protein mo    | 2/470  | 65/23843  | 0.367657 | 0.619612 | 0.5801   | Rnf20/Tsg1   |
| GO_BP_m2GO:000740neuroblast    | 2/470  | 65/23843  | 0.367657 | 0.619612 | 0.5801   | Six3/Vax1    |
| GO_BP_m2GO:001657histone de    | 2/470  | 65/23843  | 0.367657 | 0.619612 | 0.5801   | Pink1/Sirt7  |
| GO_BP_m2GO:005511regulation    | 2/470  | 65/23843  | 0.367657 | 0.619612 | 0.5801   | Agrn/Pde4    |
| GO_BP_m2GO:007265protein loc   | 6/470  | 249/23843 | 0.367692 | 0.619612 | 0.5801   | Csk/Fam12    |
| GO_BP_m2GO:000925ribonucleo    | 10/470 | 440/23843 | 0.368783 | 0.621202 | 0.581588 | Adsl/Cad/F   |
| GO_BP_m2GO:000268regulation    | 3/470  | 110/23843 | 0.369326 | 0.621617 | 0.581976 | Ptk2b/Rac2   |
| GO_BP_m2GO:005086negative re   | 3/470  | 110/23843 | 0.369326 | 0.621617 | 0.581976 | Bmp4/Prka    |
| GO_BP_m2GO:006040cytosolic c   | 4/470  | 156/23843 | 0.369794 | 0.622155 | 0.58248  | Bmp4/Chd     |

|                                    |           |          |          |          |             |
|------------------------------------|-----------|----------|----------|----------|-------------|
| GO_BP_m2GO:004343response to7/470  | 298/23843 | 0.373152 | 0.627553 | 0.587534 | Cad/Cry1/   |
| GO_BP_m2GO:000694striated m4/470   | 157/23843 | 0.374264 | 0.627694 | 0.587666 | Agrn/Gpd1   |
| GO_BP_m2GO:000756female pre4/470   | 157/23843 | 0.374264 | 0.627694 | 0.587666 | Acsl4/H3f3  |
| GO_BP_m2GO:000154ovarian foll2/470 | 66/23843  | 0.374731 | 0.627694 | 0.587666 | Bmp4/Lfng   |
| GO_BP_m2GO:000865cellular am2/470  | 66/23843  | 0.374731 | 0.627694 | 0.587666 | Cad/Glul    |
| GO_BP_m2GO:004340negative re2/470  | 66/23843  | 0.374731 | 0.627694 | 0.587666 | Bmp4/Sfrp   |
| GO_BP_m2GO:005129centrosom2/470    | 66/23843  | 0.374731 | 0.627694 | 0.587666 | Cep120/Cf   |
| GO_BP_m2GO:006068regulation 2/470  | 66/23843  | 0.374731 | 0.627694 | 0.587666 | Bmp4/Fkbf   |
| GO_BP_m2GO:190118regulation 2/470  | 66/23843  | 0.374731 | 0.627694 | 0.587666 | Aplp2/Tsg1  |
| GO_BP_m2GO:190179regulation 2/470  | 66/23843  | 0.374731 | 0.627694 | 0.587666 | Dyrk1a/Pct  |
| GO_BP_m2GO:190372regulation 2/470  | 66/23843  | 0.374731 | 0.627694 | 0.587666 | Mttr2/Ptk   |
| GO_BP_m2GO:001605carbohydr5/470    | 204/23843 | 0.375361 | 0.628497 | 0.588418 | Atf4/Chst1  |
| GO_BP_m2GO:005104positive re11/470 | 492/23843 | 0.378483 | 0.630045 | 0.589867 | Glul/Mavs/  |
| GO_BP_m2GO:000926response to4/470  | 158/23843 | 0.378731 | 0.630045 | 0.589867 | Slc52a3/Tg  |
| GO_BP_m2GO:000622pyrimidine 1/470  | 24/23843  | 0.380011 | 0.630045 | 0.589867 | Cad         |
| GO_BP_m2GO:000630postreplica 1/470 | 24/23843  | 0.380011 | 0.630045 | 0.589867 | Zbtb1       |
| GO_BP_m2GO:000709mitotic G2 1/470  | 24/23843  | 0.380011 | 0.630045 | 0.589867 | Foxo4       |
| GO_BP_m2GO:001093regulation 1/470  | 24/23843  | 0.380011 | 0.630045 | 0.589867 | Hebp2       |
| GO_BP_m2GO:001626O-glycan p1/470   | 24/23843  | 0.380011 | 0.630045 | 0.589867 | Galnt2      |
| GO_BP_m2GO:002188olfactory b 1/470 | 24/23843  | 0.380011 | 0.630045 | 0.589867 | Sall3       |
| GO_BP_m2GO:003020heparan su1/470   | 24/23843  | 0.380011 | 0.630045 | 0.589867 | Sulf2       |
| GO_BP_m2GO:003072ovulation 1/470   | 24/23843  | 0.380011 | 0.630045 | 0.589867 | Plau        |
| GO_BP_m2GO:003106negative re1/470  | 24/23843  | 0.380011 | 0.630045 | 0.589867 | Kdm3a       |
| GO_BP_m2GO:003110animal org.1/470  | 24/23843  | 0.380011 | 0.630045 | 0.589867 | Sulf2       |
| GO_BP_m2GO:003277positive re1/470  | 24/23843  | 0.380011 | 0.630045 | 0.589867 | Ptk2b       |
| GO_BP_m2GO:004205negative re1/470  | 24/23843  | 0.380011 | 0.630045 | 0.589867 | Tsg101      |
| GO_BP_m2GO:004434type B pan1/470   | 24/23843  | 0.380011 | 0.630045 | 0.589867 | Nr4a3       |
| GO_BP_m2GO:004504protein tar1/470  | 24/23843  | 0.380011 | 0.630045 | 0.589867 | Sec63       |
| GO_BP_m2GO:004867regulation 1/470  | 24/23843  | 0.380011 | 0.630045 | 0.589867 | Spg20       |
| GO_BP_m2GO:005157regulation 1/470  | 24/23843  | 0.380011 | 0.630045 | 0.589867 | Kdm3a       |
| GO_BP_m2GO:009002regulation 1/470  | 24/23843  | 0.380011 | 0.630045 | 0.589867 | S100a14     |
| GO_BP_m2GO:190173regulation 1/470  | 24/23843  | 0.380011 | 0.630045 | 0.589867 | Cd53        |
| GO_BP_m2GO:190429regulation 1/470  | 24/23843  | 0.380011 | 0.630045 | 0.589867 | Ube2j1      |
| GO_BP_m2GO:190593regulation 1/470  | 24/23843  | 0.380011 | 0.630045 | 0.589867 | Gdf9        |
| GO_BP_m2GO:200072positive re1/470  | 24/23843  | 0.380011 | 0.630045 | 0.589867 | Bmp4        |
| GO_BP_m2GO:004616alcohol bio3/470  | 112/23843 | 0.380039 | 0.630045 | 0.589867 | Pcbd1/Ptk2  |
| GO_BP_m2GO:190305positive re3/470  | 112/23843 | 0.380039 | 0.630045 | 0.589867 | Rack1/Ptk2  |
| GO_BP_m2GO:000640tRNA modi2/470    | 67/23843  | 0.381774 | 0.632171 | 0.591858 | Ftsj1/Nsun1 |
| GO_BP_m2GO:005088neuromusc2/470    | 67/23843  | 0.381774 | 0.632171 | 0.591858 | Aplp2/Nr4a3 |
| GO_BP_m2GO:005114smooth m2/470     | 67/23843  | 0.381774 | 0.632171 | 0.591858 | Bmp4/Foxc1  |
| GO_BP_m2GO:000665glycerophc5/470   | 206/23843 | 0.383172 | 0.633277 | 0.592893 | Cdipt/Fam1  |
| GO_BP_m2GO:000836regulation 4/470  | 159/23843 | 0.383196 | 0.633277 | 0.592893 | Arap3/Barr  |
| GO_BP_m2GO:003083regulation 4/470  | 159/23843 | 0.383196 | 0.633277 | 0.592893 | Ptk2b/Rac2  |
| GO_BP_m2GO:007058protein loc4/470  | 159/23843 | 0.383196 | 0.633277 | 0.592893 | Pink1/Rac2  |
| GO_BP_m2GO:200125regulation 4/470  | 159/23843 | 0.383196 | 0.633277 | 0.592893 | Bmp4/Pde4   |
| GO_BP_m2GO:003033positive re11/470 | 494/23843 | 0.383494 | 0.63352  | 0.59312  | Angpt4/Br   |
| GO_BP_m2GO:004854response to6/470  | 254/23843 | 0.385246 | 0.635886 | 0.595336 | Bmp4/Cry1   |
| GO_BP_m2GO:006056developme6/470    | 254/23843 | 0.385246 | 0.635886 | 0.595336 | Auts2/Bmp   |

|                                    |           |          |          |          |              |
|------------------------------------|-----------|----------|----------|----------|--------------|
| GO_BP_m2GO:000185embryonic 3/470   | 113/23843 | 0.385381 | 0.635886 | 0.595336 | Cebpa/Csf2   |
| GO_BP_m2GO:000275positive re3/470  | 302/23843 | 0.386014 | 0.636491 | 0.595902 | Glul/Mavk    |
| GO_BP_m2GO:000725JAK-STAT 5/470    | 207/23843 | 0.387077 | 0.636491 | 0.595902 | Csf2/Ifna4/  |
| GO_BP_m2GO:004390regulation 9/470  | 399/23843 | 0.388263 | 0.636491 | 0.595902 | Chmp3/Il12   |
| GO_BP_m2GO:000007regulation 2/470  | 68/23843  | 0.388782 | 0.636491 | 0.595902 | Cks1b/Lats   |
| GO_BP_m2GO:003023myofibril as2/470 | 68/23843  | 0.388782 | 0.636491 | 0.595902 | Klhl41/Prka  |
| GO_BP_m2GO:004250regulation 2/470  | 68/23843  | 0.388782 | 0.636491 | 0.595902 | Csf2/Suz12   |
| GO_BP_m2GO:004584negative re2/470  | 68/23843  | 0.388782 | 0.636491 | 0.595902 | Bmp4/Tll2    |
| GO_BP_m2GO:004864regulation 2/470  | 68/23843  | 0.388782 | 0.636491 | 0.595902 | Klhl41/Tll2  |
| GO_BP_m2GO:014005organelle lr2/470 | 68/23843  | 0.388782 | 0.636491 | 0.595902 | Ralb/Stxbp   |
| GO_BP_m2GO:002240molting cyc3/470  | 114/23843 | 0.390712 | 0.636491 | 0.595902 | Dkk4/Farp2   |
| GO_BP_m2GO:002240hair cycle 3/470  | 114/23843 | 0.390712 | 0.636491 | 0.595902 | Dkk4/Farp2   |
| GO_BP_m2GO:003157DNA integr3/470   | 114/23843 | 0.390712 | 0.636491 | 0.595902 | Cdc5l/Cry1   |
| GO_BP_m2GO:005164vesicle loca5/470 | 208/23843 | 0.39098  | 0.636491 | 0.595902 | Bloc1s2/Cp   |
| GO_BP_m2GO:000030response tr1/470  | 25/23843  | 0.392244 | 0.636491 | 0.595902 | Ucp2         |
| GO_BP_m2GO:000046cleavage in1/470  | 25/23843  | 0.392244 | 0.636491 | 0.595902 | Exosc2       |
| GO_BP_m2GO:000175organ indu1/470   | 25/23843  | 0.392244 | 0.636491 | 0.595902 | Bmp4         |
| GO_BP_m2GO:000282regulation 1/470  | 25/23843  | 0.392244 | 0.636491 | 0.595902 | Il12rb1      |
| GO_BP_m2GO:000721gamma-an1/470     | 25/23843  | 0.392244 | 0.636491 | 0.595902 | Atf4         |
| GO_BP_m2GO:000728spermatid 1/470   | 25/23843  | 0.392244 | 0.636491 | 0.595902 | Kdm3a        |
| GO_BP_m2GO:001074macrophag1/470    | 25/23843  | 0.392244 | 0.636491 | 0.595902 | Csf2         |
| GO_BP_m2GO:001086positive re1/470  | 25/23843  | 0.392244 | 0.636491 | 0.595902 | Sele         |
| GO_BP_m2GO:003051positive re1/470  | 25/23843  | 0.392244 | 0.636491 | 0.595902 | Tgfb1i1      |
| GO_BP_m2GO:003280receptor ca1/470  | 25/23843  | 0.392244 | 0.636491 | 0.595902 | Mtmr2        |
| GO_BP_m2GO:003287regulation 1/470  | 25/23843  | 0.392244 | 0.636491 | 0.595902 | Ptk2b        |
| GO_BP_m2GO:003634post-anal t1/470  | 25/23843  | 0.392244 | 0.636491 | 0.595902 | Sfrp2        |
| GO_BP_m2GO:004210positive re1/470  | 25/23843  | 0.392244 | 0.636491 | 0.595902 | Il12rb1      |
| GO_BP_m2GO:004564positive re1/470  | 25/23843  | 0.392244 | 0.636491 | 0.595902 | Id2          |
| GO_BP_m2GO:004636monosaccl1/470    | 25/23843  | 0.392244 | 0.636491 | 0.595902 | Pfkfb2       |
| GO_BP_m2GO:004864negative re1/470  | 25/23843  | 0.392244 | 0.636491 | 0.595902 | Tll2         |
| GO_BP_m2GO:005090leukocyte t1/470  | 25/23843  | 0.392244 | 0.636491 | 0.595902 | Sele         |
| GO_BP_m2GO:006076regulation 1/470  | 25/23843  | 0.392244 | 0.636491 | 0.595902 | Rnf6         |
| GO_BP_m2GO:006109negative re1/470  | 25/23843  | 0.392244 | 0.636491 | 0.595902 | Tsg101       |
| GO_BP_m2GO:006121positive re1/470  | 25/23843  | 0.392244 | 0.636491 | 0.595902 | Bmp4         |
| GO_BP_m2GO:007142hematopoi1/470    | 25/23843  | 0.392244 | 0.636491 | 0.595902 | Sfrp2        |
| GO_BP_m2GO:009014regulation 1/470  | 25/23843  | 0.392244 | 0.636491 | 0.595902 | Pink1        |
| GO_BP_m2GO:009962cardiac mu1/470   | 25/23843  | 0.392244 | 0.636491 | 0.595902 | Kcnh2        |
| GO_BP_m2GO:190118negative re1/470  | 25/23843  | 0.392244 | 0.636491 | 0.595902 | Tsg101       |
| GO_BP_m2GO:190384positive re1/470  | 25/23843  | 0.392244 | 0.636491 | 0.595902 | Tgfb1i1      |
| GO_BP_m2GO:190403negative re1/470  | 25/23843  | 0.392244 | 0.636491 | 0.595902 | Lats2        |
| GO_BP_m2GO:190437negative re1/470  | 25/23843  | 0.392244 | 0.636491 | 0.595902 | Csk          |
| GO_BP_m2GO:200005regulation 1/470  | 25/23843  | 0.392244 | 0.636491 | 0.595902 | Sfrp2        |
| GO_BP_m2GO:003240regulation 6/470  | 256/23843 | 0.39227  | 0.636491 | 0.595902 | Agrn/Bmp4    |
| GO_BP_m2GO:007259reactive ox6/470  | 256/23843 | 0.39227  | 0.636491 | 0.595902 | Cyb5r4/Cyl   |
| GO_BP_m2GO:004211B cell activ9/470 | 401/23843 | 0.393863 | 0.638829 | 0.598091 | Id2/Ifna4/lc |
| GO_BP_m2GO:003287regulation 5/470  | 209/23843 | 0.394881 | 0.639985 | 0.599173 | Gdf6/Nbr1    |
| GO_BP_m2GO:009769STAT casca5/470   | 209/23843 | 0.394881 | 0.639985 | 0.599173 | Csf2/Ifna4/  |
| GO_BP_m2GO:000609gluconeog2/470    | 69/23843  | 0.395754 | 0.640658 | 0.599803 | Atf4/Cry1    |

|                                |        |           |          |          |          |            |
|--------------------------------|--------|-----------|----------|----------|----------|------------|
| GO_BP_m2GO:005115positive re   | 2/470  | 69/23843  | 0.395754 | 0.640658 | 0.599803 | Bmp4/Cd5   |
| GO_BP_m2GO:006117regulation    | 2/470  | 69/23843  | 0.395754 | 0.640658 | 0.599803 | Oxct1/Ucp  |
| GO_BP_m2GO:001402primary ne    | 3/470  | 115/23843 | 0.396032 | 0.64086  | 0.599993 | Bmp4/Ift12 |
| GO_BP_m2GO:001982stem cell p   | 4/470  | 162/23843 | 0.396565 | 0.641475 | 0.600568 | Elavl1/Kdm |
| GO_BP_m2GO:00703Cregulation    | 5/470  | 210/23843 | 0.39878  | 0.642006 | 0.601065 | Gdf6/Nbr1  |
| GO_BP_m2GO:001969ribose pho    | 10/470 | 452/23843 | 0.400462 | 0.642006 | 0.601065 | Adsl/Cad/F |
| GO_BP_m2GO:190054regulation    | 4/470  | 163/23843 | 0.401012 | 0.642006 | 0.601065 | Rack1/Pde  |
| GO_BP_m2GO:001056regulation    | 3/470  | 116/23843 | 0.40134  | 0.642006 | 0.601065 | Acsl4/Erfe |
| GO_BP_m2GO:006201regulation    | 9/470  | 404/23843 | 0.402268 | 0.642006 | 0.601065 | Acsl4/Erfe |
| GO_BP_m2GO:003227regulation    | 5/470  | 211/23843 | 0.402677 | 0.642006 | 0.601065 | Dyrk1a/Ptk |
| GO_BP_m2GO:190332regulation    | 5/470  | 211/23843 | 0.402677 | 0.642006 | 0.601065 | Cry1/Der1  |
| GO_BP_m2GO:190353negative re   | 5/470  | 211/23843 | 0.402677 | 0.642006 | 0.601065 | Cry1/Grm7  |
| GO_BP_m2GO:000749endoderm      | 2/470  | 70/23843  | 0.40269  | 0.642006 | 0.601065 | Angpt4/Br  |
| GO_BP_m2GO:002153diencephal    | 2/470  | 70/23843  | 0.40269  | 0.642006 | 0.601065 | Bmp4/Six3  |
| GO_BP_m2GO:004211macrophag     | 2/470  | 70/23843  | 0.40269  | 0.642006 | 0.601065 | Csf2/Jmjd6 |
| GO_BP_m2GO:004863negative re   | 2/470  | 70/23843  | 0.40269  | 0.642006 | 0.601065 | Bmp4/Tll2  |
| GO_BP_m2GO:00903Cmitotic spir  | 2/470  | 70/23843  | 0.40269  | 0.642006 | 0.601065 | Aurkb/Rab  |
| GO_BP_m2GO:20001Cnegative re   | 2/470  | 70/23843  | 0.40269  | 0.642006 | 0.601065 | Aurkb/Bmp  |
| GO_BP_m2GO:003021T cell differ | 6/470  | 259/23843 | 0.402802 | 0.642006 | 0.601065 | Bmp4/Chd   |
| GO_BP_m2GO:000673NADH met      | 1/470  | 26/23843  | 0.404237 | 0.642006 | 0.601065 | Gpd1l      |
| GO_BP_m2GO:00070Cinner mitoc   | 1/470  | 26/23843  | 0.404237 | 0.642006 | 0.601065 | Pink1      |
| GO_BP_m2GO:000906glutamine     | 1/470  | 26/23843  | 0.404237 | 0.642006 | 0.601065 | Oat        |
| GO_BP_m2GO:001016response tr   | 1/470  | 26/23843  | 0.404237 | 0.642006 | 0.601065 | Sfrp2      |
| GO_BP_m2GO:001082negative re   | 1/470  | 26/23843  | 0.404237 | 0.642006 | 0.601065 | Upk3b      |
| GO_BP_m2GO:001618snRNA pro     | 1/470  | 26/23843  | 0.404237 | 0.642006 | 0.601065 | Exosc2     |
| GO_BP_m2GO:002151spinal cord   | 1/470  | 26/23843  | 0.404237 | 0.642006 | 0.601065 | Ift122     |
| GO_BP_m2GO:002201myelinatio    | 1/470  | 26/23843  | 0.404237 | 0.642006 | 0.601065 | Adgrg6     |
| GO_BP_m2GO:003106regulation    | 1/470  | 26/23843  | 0.404237 | 0.642006 | 0.601065 | Pink1      |
| GO_BP_m2GO:003136N-terminal    | 1/470  | 26/23843  | 0.404237 | 0.642006 | 0.601065 | Metap2     |
| GO_BP_m2GO:003229peripheral    | 1/470  | 26/23843  | 0.404237 | 0.642006 | 0.601065 | Adgrg6     |
| GO_BP_m2GO:00325C DNA duple    | 1/470  | 26/23843  | 0.404237 | 0.642006 | 0.601065 | Recql      |
| GO_BP_m2GO:003323regulation    | 1/470  | 26/23843  | 0.404237 | 0.642006 | 0.601065 | Tollip     |
| GO_BP_m2GO:004275positive re   | 1/470  | 26/23843  | 0.404237 | 0.642006 | 0.601065 | Thrap3     |
| GO_BP_m2GO:004309amino acid    | 1/470  | 26/23843  | 0.404237 | 0.642006 | 0.601065 | Slc25a38   |
| GO_BP_m2GO:004345regulation    | 1/470  | 26/23843  | 0.404237 | 0.642006 | 0.601065 | Pink1      |
| GO_BP_m2GO:004511azole trans   | 1/470  | 26/23843  | 0.404237 | 0.642006 | 0.601065 | Csf2       |
| GO_BP_m2GO:004582negative re   | 1/470  | 26/23843  | 0.404237 | 0.642006 | 0.601065 | Pde4d      |
| GO_BP_m2GO:004595positive re   | 1/470  | 26/23843  | 0.404237 | 0.642006 | 0.601065 | Stxbp1     |
| GO_BP_m2GO:005195positive re   | 1/470  | 26/23843  | 0.404237 | 0.642006 | 0.601065 | Stxbp1     |
| GO_BP_m2GO:006003pharyngeal    | 1/470  | 26/23843  | 0.404237 | 0.642006 | 0.601065 | Bmp4       |
| GO_BP_m2GO:006021camera-tyr    | 1/470  | 26/23843  | 0.404237 | 0.642006 | 0.601065 | Rom1       |
| GO_BP_m2GO:006091heart form    | 1/470  | 26/23843  | 0.404237 | 0.642006 | 0.601065 | Bmp4       |
| GO_BP_m2GO:006103negative re   | 1/470  | 26/23843  | 0.404237 | 0.642006 | 0.601065 | Bmp4       |
| GO_BP_m2GO:006131cell surface  | 1/470  | 26/23843  | 0.404237 | 0.642006 | 0.601065 | Bmp4       |
| GO_BP_m2GO:007148cellular res  | 1/470  | 26/23843  | 0.404237 | 0.642006 | 0.601065 | H2afx      |
| GO_BP_m2GO:007154cellular res  | 1/470  | 26/23843  | 0.404237 | 0.642006 | 0.601065 | Bmp4       |
| GO_BP_m2GO:009007foam cell d   | 1/470  | 26/23843  | 0.404237 | 0.642006 | 0.601065 | Csf2       |
| GO_BP_m2GO:009018regulation    | 1/470  | 26/23843  | 0.404237 | 0.642006 | 0.601065 | Bmp4       |

|                                     |           |          |          |          |             |
|-------------------------------------|-----------|----------|----------|----------|-------------|
| GO_BP_m2GO:190107glucosamir1/470    | 26/23843  | 0.404237 | 0.642006 | 0.601065 | Chst5       |
| GO_BP_m2GO:190275positive reç1/470  | 26/23843  | 0.404237 | 0.642006 | 0.601065 | Rab11a      |
| GO_BP_m2GO:190435regulation 1/470   | 26/23843  | 0.404237 | 0.642006 | 0.601065 | Aurkb       |
| GO_BP_m2GO:200077positive reç1/470  | 26/23843  | 0.404237 | 0.642006 | 0.601065 | Mavs        |
| GO_BP_m2GO:000269negative re4/470   | 164/23843 | 0.405452 | 0.643692 | 0.602644 | Bmp4/Id2/   |
| GO_BP_m2GO:000300heart morç6/470    | 260/23843 | 0.406631 | 0.644566 | 0.603462 | Adgrg6/Bn   |
| GO_BP_m2GO:000760sensory pe 6/470   | 260/23843 | 0.406631 | 0.644566 | 0.603462 | Chd7/Col2.  |
| GO_BP_m2GO:004671acid secreti3/470  | 117/23843 | 0.406634 | 0.644836 | 0.603714 | Acsl4/Grm   |
| GO_BP_m2GO:001087lipid localiz8/470 | 357/23843 | 0.40691  | 0.645029 | 0.603896 | Acat2/Acsl  |
| GO_BP_m2GO:004232negative re10/470  | 455/23843 | 0.408405 | 0.647155 | 0.605886 | Bmp4/Csk/   |
| GO_BP_m2GO:000726tyrosine ph2/470   | 71/23843  | 0.409588 | 0.647547 | 0.606253 | Csf2/Suz12  |
| GO_BP_m2GO:003227negative re2/470   | 71/23843  | 0.409588 | 0.647547 | 0.606253 | Dyrk1a/Tw   |
| GO_BP_m2GO:003254mitochond 2/470    | 71/23843  | 0.409588 | 0.647547 | 0.606253 | 2810006K2   |
| GO_BP_m2GO:190186negative re2/470   | 71/23843  | 0.409588 | 0.647547 | 0.606253 | Bmp4/Tll2   |
| GO_BP_m2GO:190336negative re2/470   | 71/23843  | 0.409588 | 0.647547 | 0.606253 | Alad/Ube2   |
| GO_BP_m2GO:000679sulfur comç6/470   | 261/23843 | 0.409817 | 0.647547 | 0.606253 | Acaca/Chst  |
| GO_BP_m2GO:001097negative re4/470   | 165/23843 | 0.409887 | 0.647547 | 0.606253 | Cit/PrkcsH/ |
| GO_BP_m2GO:006113regulation 4/470   | 165/23843 | 0.409887 | 0.647547 | 0.606253 | Alad/Rack1  |
| GO_BP_m2GO:004354positive reç5/470  | 213/23843 | 0.410461 | 0.648149 | 0.606817 | Agrn/Ect2/  |
| GO_BP_m2GO:000193regulation 3/470   | 118/23843 | 0.411914 | 0.648149 | 0.606817 | Bmp4/Pdcd   |
| GO_BP_m2GO:000709centrosomç3/470    | 118/23843 | 0.411914 | 0.648149 | 0.606817 | Cep120/Ch   |
| GO_BP_m2GO:000858male gonarç3/470   | 118/23843 | 0.411914 | 0.648149 | 0.606817 | H3f3b/Sfrp  |
| GO_BP_m2GO:190303negative re3/470   | 118/23843 | 0.411914 | 0.648149 | 0.606817 | Bmp4/Prka   |
| GO_BP_m2GO:004390positive reç4/470  | 166/23843 | 0.414315 | 0.648149 | 0.606817 | Chmp3/Pla   |
| GO_BP_m2GO:009872maintenanç4/470    | 166/23843 | 0.414315 | 0.648149 | 0.606817 | Elavl1/Kdm  |
| GO_BP_m2GO:000206glandular ç1/470   | 27/23843  | 0.415994 | 0.648149 | 0.606817 | Bmp4        |
| GO_BP_m2GO:000314outflow tra 1/470  | 27/23843  | 0.415994 | 0.648149 | 0.606817 | Bmp4        |
| GO_BP_m2GO:000333metaneph 1/470     | 27/23843  | 0.415994 | 0.648149 | 0.606817 | Bmp4        |
| GO_BP_m2GO:000709nuclear miç1/470   | 27/23843  | 0.415994 | 0.648149 | 0.606817 | Cep120      |
| GO_BP_m2GO:000907aromatic ar1/470   | 27/23843  | 0.415994 | 0.648149 | 0.606817 | Pcbd1       |
| GO_BP_m2GO:002153cell differer1/470 | 27/23843  | 0.415994 | 0.648149 | 0.606817 | Faim2       |
| GO_BP_m2GO:003082regulation 1/470   | 27/23843  | 0.415994 | 0.648149 | 0.606817 | Ptk2b       |
| GO_BP_m2GO:003163plasminogç1/470    | 27/23843  | 0.415994 | 0.648149 | 0.606817 | Plau        |
| GO_BP_m2GO:003264regulation 1/470   | 27/23843  | 0.415994 | 0.648149 | 0.606817 | Mavs        |
| GO_BP_m2GO:003281positive reç1/470  | 27/23843  | 0.415994 | 0.648149 | 0.606817 | Zbtb1       |
| GO_BP_m2GO:003420amyloid-bç1/470    | 27/23843  | 0.415994 | 0.648149 | 0.606817 | Dyrk1a      |
| GO_BP_m2GO:004478modulator1/470     | 27/23843  | 0.415994 | 0.648149 | 0.606817 | Ppib        |
| GO_BP_m2GO:004874smooth mç1/470     | 27/23843  | 0.415994 | 0.648149 | 0.606817 | Bmp4        |
| GO_BP_m2GO:005112RNA polyn 1/470    | 27/23843  | 0.415994 | 0.648149 | 0.606817 | Psmc5       |
| GO_BP_m2GO:006014positive reç1/470  | 27/23843  | 0.415994 | 0.648149 | 0.606817 | Cd53        |
| GO_BP_m2GO:006026regulation 1/470   | 27/23843  | 0.415994 | 0.648149 | 0.606817 | Psmc5       |
| GO_BP_m2GO:006034trabecula fi1/470  | 27/23843  | 0.415994 | 0.648149 | 0.606817 | Adgrg6      |
| GO_BP_m2GO:006071labyrinthinç1/470  | 27/23843  | 0.415994 | 0.648149 | 0.606817 | Erf         |
| GO_BP_m2GO:007023negative re1/470   | 27/23843  | 0.415994 | 0.648149 | 0.606817 | Bmp4        |
| GO_BP_m2GO:007136cellular resç1/470 | 27/23843  | 0.415994 | 0.648149 | 0.606817 | Mir339      |
| GO_BP_m2GO:009020positive reç1/470  | 27/23843  | 0.415994 | 0.648149 | 0.606817 | Pink1       |
| GO_BP_m2GO:009734mitochond 1/470    | 27/23843  | 0.415994 | 0.648149 | 0.606817 | Bloc1s2     |
| GO_BP_m2GO:009907regulation 1/470   | 27/23843  | 0.415994 | 0.648149 | 0.606817 | Rab11a      |

|                                      |           |          |          |          |            |
|--------------------------------------|-----------|----------|----------|----------|------------|
| GO_BP_m2GO:190285positive reg1/470   | 27/23843  | 0.415994 | 0.648149 | 0.606817 | Bmp4       |
| GO_BP_m2GO:190345positive reg1/470   | 27/23843  | 0.415994 | 0.648149 | 0.606817 | Prl8a2     |
| GO_BP_m2GO:200030regulation 1/470    | 27/23843  | 0.415994 | 0.648149 | 0.606817 | Stxbp1     |
| GO_BP_m2GO:000205lens develc2/470    | 72/23843  | 0.416447 | 0.648149 | 0.606817 | Bmp4/Six3  |
| GO_BP_m2GO:000854fibroblast c2/470   | 72/23843  | 0.416447 | 0.648149 | 0.606817 | Fgfbp3/Sul |
| GO_BP_m2GO:001931hexose bio2/470     | 72/23843  | 0.416447 | 0.648149 | 0.606817 | Atf4/Cry1  |
| GO_BP_m2GO:004214retrograde 2/470    | 72/23843  | 0.416447 | 0.648149 | 0.606817 | Dennd2a/\  |
| GO_BP_m2GO:004427sulfur com2/470     | 72/23843  | 0.416447 | 0.648149 | 0.606817 | Chst12/Chs |
| GO_BP_m2GO:005065regulation 2/470    | 72/23843  | 0.416447 | 0.648149 | 0.606817 | Il12rb1/Ma |
| GO_BP_m2GO:005170multi-orga2/470     | 72/23843  | 0.416447 | 0.648149 | 0.606817 | Aplp2/Penl |
| GO_BP_m2GO:004654developme3/470      | 119/23843 | 0.417179 | 0.648568 | 0.607209 | H3f3b/Sfrp |
| GO_BP_m2GO:004682regulation 3/470    | 119/23843 | 0.417179 | 0.648568 | 0.607209 | Bmp4/Ect2  |
| GO_BP_m2GO:006135regulation 3/470    | 119/23843 | 0.417179 | 0.648568 | 0.607209 | Rab11a/Rn  |
| GO_BP_m2GO:000910coenzyme 4/470      | 168/23843 | 0.423148 | 0.652537 | 0.610925 | Coq8b/Coc  |
| GO_BP_m2GO:000334cilium mov2/470     | 73/23843  | 0.423265 | 0.652537 | 0.610925 | Cfap46/Ro  |
| GO_BP_m2GO:001083telomere r2/470     | 73/23843  | 0.423265 | 0.652537 | 0.610925 | Aurkb/Hnr  |
| GO_BP_m2GO:002240membrane 2/470      | 73/23843  | 0.423265 | 0.652537 | 0.610925 | Ralb/Stxbp |
| GO_BP_m2GO:003081regulation 2/470    | 73/23843  | 0.423265 | 0.652537 | 0.610925 | Rack1/Pde  |
| GO_BP_m2GO:004632regulation 2/470    | 73/23843  | 0.423265 | 0.652537 | 0.610925 | Aspscr1/U  |
| GO_BP_m2GO:190137regulation 2/470    | 73/23843  | 0.423265 | 0.652537 | 0.610925 | Agrn/Kcni  |
| GO_BP_m2GO:190402regulation 2/470    | 73/23843  | 0.423265 | 0.652537 | 0.610925 | Cks1b/Lats |
| GO_BP_m2GO:000740axonogene10/470     | 461/23843 | 0.424296 | 0.652537 | 0.610925 | Agrn/Auts2 |
| GO_BP_m2GO:002195central ner5/470    | 217/23843 | 0.425984 | 0.652537 | 0.610925 | Faim2/Gba  |
| GO_BP_m2GO:000030response tr1/470    | 28/23843  | 0.427519 | 0.652537 | 0.610925 | Ucp2       |
| GO_BP_m2GO:000073DNA synth1/470      | 28/23843  | 0.427519 | 0.652537 | 0.610925 | Zbtb1      |
| GO_BP_m2GO:000621pyrimidine 1/470    | 28/23843  | 0.427519 | 0.652537 | 0.610925 | Cad        |
| GO_BP_m2GO:000633DNA replic1/470     | 28/23843  | 0.427519 | 0.652537 | 0.610925 | Asf1a      |
| GO_BP_m2GO:000637mRNA clea1/470      | 28/23843  | 0.427519 | 0.652537 | 0.610925 | Ncbp2      |
| GO_BP_m2GO:000676folic acid-c1/470   | 28/23843  | 0.427519 | 0.652537 | 0.610925 | Pm20d2     |
| GO_BP_m2GO:000930rRNA trans1/470     | 28/23843  | 0.427519 | 0.652537 | 0.610925 | Sirt7      |
| GO_BP_m2GO:001045exit from r1/470    | 28/23843  | 0.427519 | 0.652537 | 0.610925 | Sirt7      |
| GO_BP_m2GO:001071negative re1/470    | 28/23843  | 0.427519 | 0.652537 | 0.610925 | Sfrp2      |
| GO_BP_m2GO:001075regulation 1/470    | 28/23843  | 0.427519 | 0.652537 | 0.610925 | Ptk2b      |
| GO_BP_m2GO:001595ATP hydrol1/470     | 28/23843  | 0.427519 | 0.652537 | 0.610925 | Atp6v1h    |
| GO_BP_m2GO:001624negative re1/470    | 28/23843  | 0.427519 | 0.652537 | 0.610925 | Pink1      |
| GO_BP_m2GO:002151spinal cord1/470    | 28/23843  | 0.427519 | 0.652537 | 0.610925 | Ift122     |
| GO_BP_m2GO:002165cerebellar c1/470   | 28/23843  | 0.427519 | 0.652537 | 0.610925 | Faim2      |
| GO_BP_m2GO:003260interferon-1/470    | 28/23843  | 0.427519 | 0.652537 | 0.610925 | Mavs       |
| GO_BP_m2GO:003315regulation 1/470    | 28/23843  | 0.427519 | 0.652537 | 0.610925 | Mavs       |
| GO_BP_m2GO:004355positive reg1/470   | 28/23843  | 0.427519 | 0.652537 | 0.610925 | Ptk2b      |
| GO_BP_m2GO:004567negative re1/470    | 28/23843  | 0.427519 | 0.652537 | 0.610925 | Mafb       |
| GO_BP_m2GO:004685phosphatic1/470     | 28/23843  | 0.427519 | 0.652537 | 0.610925 | Fam126a    |
| GO_BP_m2GO:004855embryonic 1/470     | 28/23843  | 0.427519 | 0.652537 | 0.610925 | Six3       |
| GO_BP_m2GO:004882hair follicle 1/470 | 28/23843  | 0.427519 | 0.652537 | 0.610925 | Nsun2      |
| GO_BP_m2GO:005065chondroitir1/470    | 28/23843  | 0.427519 | 0.652537 | 0.610925 | Chst12     |
| GO_BP_m2GO:006121regulation 1/470    | 28/23843  | 0.427519 | 0.652537 | 0.610925 | Bmp4       |
| GO_BP_m2GO:006125retina vasc1/470    | 28/23843  | 0.427519 | 0.652537 | 0.610925 | Rom1       |
| GO_BP_m2GO:007135cellular res1/470   | 28/23843  | 0.427519 | 0.652537 | 0.610925 | Alad       |



|                                     |           |          |          |          |              |
|-------------------------------------|-----------|----------|----------|----------|--------------|
| GO_BP_m2GO:007239signal trans1/470  | 28/23843  | 0.427519 | 0.652537 | 0.610925 | Cdc5l        |
| GO_BP_m2GO:007240signal trans1/470  | 28/23843  | 0.427519 | 0.652537 | 0.610925 | Cdc5l        |
| GO_BP_m2GO:007242signal trans1/470  | 28/23843  | 0.427519 | 0.652537 | 0.610925 | Cdc5l        |
| GO_BP_m2GO:007259establishment1/470 | 28/23843  | 0.427519 | 0.652537 | 0.610925 | Sec63        |
| GO_BP_m2GO:009066ATP hydrol1/470    | 28/23843  | 0.427519 | 0.652537 | 0.610925 | Atp6v1h      |
| GO_BP_m2GO:009913ATP hydrol1/470    | 28/23843  | 0.427519 | 0.652537 | 0.610925 | Atp6v1h      |
| GO_BP_m2GO:009913ATP hydrol1/470    | 28/23843  | 0.427519 | 0.652537 | 0.610925 | Atp6v1h      |
| GO_BP_m2GO:190027regulation 1/470   | 28/23843  | 0.427519 | 0.652537 | 0.610925 | Sele         |
| GO_BP_m2GO:190217regulation 1/470   | 28/23843  | 0.427519 | 0.652537 | 0.610925 | Pink1        |
| GO_BP_m2GO:190280regulation 1/470   | 28/23843  | 0.427519 | 0.652537 | 0.610925 | Stxbp1       |
| GO_BP_m2GO:200027negative re1/470   | 28/23843  | 0.427519 | 0.652537 | 0.610925 | Tsg101       |
| GO_BP_m2GO:200027positive re1/470   | 28/23843  | 0.427519 | 0.652537 | 0.610925 | Pink1        |
| GO_BP_m2GO:000189placenta de4/470   | 169/23843 | 0.427553 | 0.652537 | 0.610925 | Cebpa/Csf1   |
| GO_BP_m2GO:000072telomere nr3/470   | 121/23843 | 0.427664 | 0.652537 | 0.610925 | Aurkb/Hnrr   |
| GO_BP_m2GO:001810peptidyl-tr3/470   | 121/23843 | 0.427664 | 0.652537 | 0.610925 | Cad/Clk1/Cl  |
| GO_BP_m2GO:190165glycosyl co3/470   | 121/23843 | 0.427664 | 0.652537 | 0.610925 | Cad/Gba2/    |
| GO_BP_m2GO:004856embryonic 7/470    | 315/23843 | 0.427819 | 0.652537 | 0.610925 | Bmp4/Chd     |
| GO_BP_m2GO:003320tumor necr2/470    | 74/23843  | 0.430042 | 0.655689 | 0.613876 | Ptk2b/Txnc   |
| GO_BP_m2GO:005105regulation 6/470   | 267/23843 | 0.430809 | 0.656662 | 0.614747 | Arap3/Autsc  |
| GO_BP_m2GO:000614regulation 4/470   | 170/23843 | 0.431949 | 0.657834 | 0.615884 | Rack1/Pde    |
| GO_BP_m2GO:003004actin filame4/470  | 170/23843 | 0.431949 | 0.657834 | 0.615884 | Ptk2b/Rac2   |
| GO_BP_m2GO:003192TOR signal 3/470   | 122/23843 | 0.432881 | 0.657834 | 0.615884 | Gatsl2/Iftfg |
| GO_BP_m2GO:190332positive re3/470   | 122/23843 | 0.432881 | 0.657834 | 0.615884 | Derl1/Rnf2   |
| GO_BP_m2GO:003629response tr5/470   | 219/23843 | 0.433717 | 0.657834 | 0.615884 | Cybb/Pink1   |
| GO_BP_m2GO:000803cell recogn6/470   | 268/23843 | 0.434297 | 0.657834 | 0.615884 | Ighv1-23/1   |
| GO_BP_m2GO:005125protein pol6/470   | 268/23843 | 0.434297 | 0.657834 | 0.615884 | Chmp3/Dy     |
| GO_BP_m2GO:007122cellular res6/470  | 268/23843 | 0.434297 | 0.657834 | 0.615884 | Acaca/Mir3   |
| GO_BP_m2GO:000028nuclear div9/470   | 416/23843 | 0.435886 | 0.657834 | 0.615884 | Aurkb/Bmp4   |
| GO_BP_m2GO:001619endosomal4/470     | 171/23843 | 0.436335 | 0.657834 | 0.615884 | Chmp3/De     |
| GO_BP_m2GO:003314regulation 2/470   | 75/23843  | 0.436777 | 0.657834 | 0.615884 | Cry1/Rnf6    |
| GO_BP_m2GO:004568regulation 2/470   | 75/23843  | 0.436777 | 0.657834 | 0.615884 | Bmp4/Dkk1    |
| GO_BP_m2GO:005067regulation 5/470   | 220/23843 | 0.437575 | 0.657834 | 0.615884 | Bmp4/Il12r   |
| GO_BP_m2GO:000182kidney dev6/470    | 269/23843 | 0.437782 | 0.657834 | 0.615884 | Bmp4/Id2/    |
| GO_BP_m2GO:190303regulation 6/470   | 269/23843 | 0.437782 | 0.657834 | 0.615884 | Bmp4/Il12r   |
| GO_BP_m2GO:004599regulation 3/470   | 123/23843 | 0.438081 | 0.657834 | 0.615884 | Bmp4/Lfng    |
| GO_BP_m2GO:004856digestive tr3/470  | 123/23843 | 0.438081 | 0.657834 | 0.615884 | Bmp4/Id2/    |
| GO_BP_m2GO:190018regulation 3/470   | 123/23843 | 0.438081 | 0.657834 | 0.615884 | Bmp4/Ect2    |
| GO_BP_m2GO:190465glucose tra3/470   | 123/23843 | 0.438081 | 0.657834 | 0.615884 | Aspscr1/Nr   |
| GO_BP_m2GO:000155oocyte mat1/470    | 29/23843  | 0.438817 | 0.657834 | 0.615884 | Ptk2b        |
| GO_BP_m2GO:000191regulation 1/470   | 29/23843  | 0.438817 | 0.657834 | 0.615884 | Vamp3        |
| GO_BP_m2GO:000209positive re1/470   | 29/23843  | 0.438817 | 0.657834 | 0.615884 | Sele         |
| GO_BP_m2GO:000330type B pan1/470    | 29/23843  | 0.438817 | 0.657834 | 0.615884 | Bmp4         |
| GO_BP_m2GO:000603tricarboxyli1/470  | 29/23843  | 0.438817 | 0.657834 | 0.615884 | Aco1         |
| GO_BP_m2GO:000922nucleotide-1/470   | 29/23843  | 0.438817 | 0.657834 | 0.615884 | Mgat1        |
| GO_BP_m2GO:001039histone mc1/470    | 29/23843  | 0.438817 | 0.657834 | 0.615884 | Rnf20        |
| GO_BP_m2GO:001404Schwann c1/470     | 29/23843  | 0.438817 | 0.657834 | 0.615884 | Adgrg6       |
| GO_BP_m2GO:003094regulation 1/470   | 29/23843  | 0.438817 | 0.657834 | 0.615884 | Bmp4         |
| GO_BP_m2GO:003278positive re1/470   | 29/23843  | 0.438817 | 0.657834 | 0.615884 | Ell          |

|                                     |           |          |          |          |            |
|-------------------------------------|-----------|----------|----------|----------|------------|
| GO_BP_m2GO:003295inositol pho1/470  | 29/23843  | 0.438817 | 0.657834 | 0.615884 | Ptk2b      |
| GO_BP_m2GO:003326nuclear DN1/470    | 29/23843  | 0.438817 | 0.657834 | 0.615884 | Wdr18      |
| GO_BP_m2GO:003472DNA replic1/470    | 29/23843  | 0.438817 | 0.657834 | 0.615884 | Asf1a      |
| GO_BP_m2GO:003506positive re1/470   | 29/23843  | 0.438817 | 0.657834 | 0.615884 | Auts2      |
| GO_BP_m2GO:004311regulation 1/470   | 29/23843  | 0.438817 | 0.657834 | 0.615884 | Fgfbp3     |
| GO_BP_m2GO:004330positive re1/470   | 29/23843  | 0.438817 | 0.657834 | 0.615884 | Stxbp1     |
| GO_BP_m2GO:004518regulation 1/470   | 29/23843  | 0.438817 | 0.657834 | 0.615884 | Csf2       |
| GO_BP_m2GO:006030regulation 1/470   | 29/23843  | 0.438817 | 0.657834 | 0.615884 | Kcnh2      |
| GO_BP_m2GO:006057morphoge1/470      | 29/23843  | 0.438817 | 0.657834 | 0.615884 | Bmp4       |
| GO_BP_m2GO:006175leukocyte e1/470   | 29/23843  | 0.438817 | 0.657834 | 0.615884 | Sele       |
| GO_BP_m2GO:007030lens fiber c1/470  | 29/23843  | 0.438817 | 0.657834 | 0.615884 | Six3       |
| GO_BP_m2GO:007154response tr1/470   | 29/23843  | 0.438817 | 0.657834 | 0.615884 | Bmp4       |
| GO_BP_m2GO:007252pyrimidine 1/470   | 29/23843  | 0.438817 | 0.657834 | 0.615884 | Cad        |
| GO_BP_m2GO:009002positive re1/470   | 29/23843  | 0.438817 | 0.657834 | 0.615884 | Rac2       |
| GO_BP_m2GO:190348regulation 1/470   | 29/23843  | 0.438817 | 0.657834 | 0.615884 | Prl8a2     |
| GO_BP_m2GO:190403positive re1/470   | 29/23843  | 0.438817 | 0.657834 | 0.615884 | Bmp4       |
| GO_BP_m2GO:200101regulation 1/470   | 29/23843  | 0.438817 | 0.657834 | 0.615884 | Klhl41     |
| GO_BP_m2GO:007135cellular res4/470  | 172/23843 | 0.440713 | 0.660439 | 0.618323 | Cebpa/Mir  |
| GO_BP_m2GO:007048response tr6/470   | 270/23843 | 0.441263 | 0.661027 | 0.618874 | Cybb/Mir1. |
| GO_BP_m2GO:000646negative re5/470   | 221/23843 | 0.441428 | 0.661039 | 0.618885 | Bmp4/Lats  |
| GO_BP_m2GO:000703vacuolar tr3/470   | 124/23843 | 0.443262 | 0.661968 | 0.619754 | Chmp3/Pir  |
| GO_BP_m2GO:007133cellular res3/470  | 124/23843 | 0.443262 | 0.661968 | 0.619754 | Rack1/Oxc  |
| GO_BP_m2GO:009755calcium ior3/470   | 124/23843 | 0.443262 | 0.661968 | 0.619754 | Chd7/Pde4  |
| GO_BP_m2GO:000175somitogen2/470     | 76/23843  | 0.443468 | 0.661968 | 0.619754 | Lfng/Sfrp2 |
| GO_BP_m2GO:000649protein O- 2/470   | 76/23843  | 0.443468 | 0.661968 | 0.619754 | Galnt2/Lfn |
| GO_BP_m2GO:000667ceramide n2/470    | 76/23843  | 0.443468 | 0.661968 | 0.619754 | Gba2/Sgpl  |
| GO_BP_m2GO:000683dicarboxyli2/470   | 76/23843  | 0.443468 | 0.661968 | 0.619754 | Grm7/Stxb  |
| GO_BP_m2GO:004352positive re2/470   | 76/23843  | 0.443468 | 0.661968 | 0.619754 | Agrn/Atf4  |
| GO_BP_m2GO:190395positive re2/470   | 76/23843  | 0.443468 | 0.661968 | 0.619754 | Pink1/Rac2 |
| GO_BP_m2GO:006135neural prec4/470   | 173/23843 | 0.44508  | 0.662695 | 0.620435 | Cep120/Id  |
| GO_BP_m2GO:003294regulation 5/470   | 222/23843 | 0.445274 | 0.662695 | 0.620435 | Bmp4/Il12r |
| GO_BP_m2GO:190336regulation 5/470   | 222/23843 | 0.445274 | 0.662695 | 0.620435 | Alad/Rack1 |
| GO_BP_m2GO:001603viral proce6/470   | 272/23843 | 0.448211 | 0.662695 | 0.620435 | Chmp3/Ma   |
| GO_BP_m2GO:000758digestion 3/470    | 125/23843 | 0.448425 | 0.662695 | 0.620435 | Acat2/Aco  |
| GO_BP_m2GO:000864hexose trar3/470   | 125/23843 | 0.448425 | 0.662695 | 0.620435 | Aspscr1/Nr |
| GO_BP_m2GO:003227positive re3/470   | 125/23843 | 0.448425 | 0.662695 | 0.620435 | Ptk2b/Rac2 |
| GO_BP_m2GO:003476negative re3/470   | 125/23843 | 0.448425 | 0.662695 | 0.620435 | Agrn/Kcnh  |
| GO_BP_m2GO:000176neuron miç4/470    | 174/23843 | 0.449437 | 0.662695 | 0.620435 | Auts2/Lmx  |
| GO_BP_m2GO:004576positive re4/470   | 174/23843 | 0.449437 | 0.662695 | 0.620435 | Angpt4/Cy  |
| GO_BP_m2GO:000153cilium or fl1/470  | 30/23843  | 0.449893 | 0.662695 | 0.620435 | Cfap46     |
| GO_BP_m2GO:000290regulation 1/470   | 30/23843  | 0.449893 | 0.662695 | 0.620435 | Aurkb      |
| GO_BP_m2GO:000622pyrimidine 1/470   | 30/23843  | 0.449893 | 0.662695 | 0.620435 | Cad        |
| GO_BP_m2GO:001066negative re1/470   | 30/23843  | 0.449893 | 0.662695 | 0.620435 | Sfrp2      |
| GO_BP_m2GO:002160cranial nen1/470   | 30/23843  | 0.449893 | 0.662695 | 0.620435 | Mafb       |
| GO_BP_m2GO:003259protein tra1/470   | 30/23843  | 0.449893 | 0.662695 | 0.620435 | Rab11a     |
| GO_BP_m2GO:003296positive re1/470   | 30/23843  | 0.449893 | 0.662695 | 0.620435 | Bmp4       |
| GO_BP_m2GO:003414toll-like rec1/470 | 30/23843  | 0.449893 | 0.662695 | 0.620435 | S100a14    |
| GO_BP_m2GO:003532hippo sign1/470    | 30/23843  | 0.449893 | 0.662695 | 0.620435 | Lats2      |

|                               |        |           |          |          |          |            |
|-------------------------------|--------|-----------|----------|----------|----------|------------|
| GO_BP_m2GO:003564explorator   | 1/470  | 30/23843  | 0.449893 | 0.662695 | 0.620435 | Penk       |
| GO_BP_m2GO:004248regulation   | 1/470  | 30/23843  | 0.449893 | 0.662695 | 0.620435 | Bmp4       |
| GO_BP_m2GO:004255superoxide   | 1/470  | 30/23843  | 0.449893 | 0.662695 | 0.620435 | Cybb       |
| GO_BP_m2GO:004431wound hea    | 1/470  | 30/23843  | 0.449893 | 0.662695 | 0.620435 | Pdcd10     |
| GO_BP_m2GO:004566negative re  | 1/470  | 30/23843  | 0.449893 | 0.662695 | 0.620435 | Bmp4       |
| GO_BP_m2GO:004603GTP metab    | 1/470  | 30/23843  | 0.449893 | 0.662695 | 0.620435 | Ran        |
| GO_BP_m2GO:005080circadian sl | 1/470  | 30/23843  | 0.449893 | 0.662695 | 0.620435 | Csf2       |
| GO_BP_m2GO:005156regulation   | 1/470  | 30/23843  | 0.449893 | 0.662695 | 0.620435 | Auts2      |
| GO_BP_m2GO:005507potassium    | 1/470  | 30/23843  | 0.449893 | 0.662695 | 0.620435 | Kcnnh2     |
| GO_BP_m2GO:006028cilium-dep   | 1/470  | 30/23843  | 0.449893 | 0.662695 | 0.620435 | Cfap46     |
| GO_BP_m2GO:007067response tr  | 1/470  | 30/23843  | 0.449893 | 0.662695 | 0.620435 | Alad       |
| GO_BP_m2GO:009050epiboly inv  | 1/470  | 30/23843  | 0.449893 | 0.662695 | 0.620435 | Pdcd10     |
| GO_BP_m2GO:190211positive re  | 1/470  | 30/23843  | 0.449893 | 0.662695 | 0.620435 | Bloc1s2    |
| GO_BP_m2GO:190552regulation   | 1/470  | 30/23843  | 0.449893 | 0.662695 | 0.620435 | Ptk2b      |
| GO_BP_m2GO:000911ribonucleo   | 2/470  | 77/23843  | 0.450115 | 0.662695 | 0.620435 | Cad/Ran    |
| GO_BP_m2GO:003310mitochond    | 2/470  | 77/23843  | 0.450115 | 0.662695 | 0.620435 | Ndufaf8/Sc |
| GO_BP_m2GO:003577insulin secr | 2/470  | 77/23843  | 0.450115 | 0.662695 | 0.620435 | Oxct1/Ucp1 |
| GO_BP_m2GO:004227ribosomal    | 2/470  | 77/23843  | 0.450115 | 0.662695 | 0.620435 | Pwp2/Utp1  |
| GO_BP_m2GO:005145regulation   | 2/470  | 77/23843  | 0.450115 | 0.662695 | 0.620435 | Atp6v1h/G  |
| GO_BP_m2GO:006097coronary v   | 2/470  | 77/23843  | 0.450115 | 0.662695 | 0.620435 | Ap2b1/Bm   |
| GO_BP_m2GO:001922cytokine-r   | 8/470  | 372/23843 | 0.451626 | 0.664532 | 0.622155 | Cebpa/Irfn |
| GO_BP_m2GO:005134negative re  | 6/470  | 273/23843 | 0.451679 | 0.664532 | 0.622155 | Bmp4/Csk/  |
| GO_BP_m2GO:007265protein loc  | 10/470 | 472/23843 | 0.453373 | 0.666377 | 0.623882 | Agrn/Csk/F |
| GO_BP_m2GO:003102microtubul   | 3/470  | 126/23843 | 0.453569 | 0.666377 | 0.623882 | Cep120/Ct  |
| GO_BP_m2GO:007133cellular res | 3/470  | 126/23843 | 0.453569 | 0.666377 | 0.623882 | Rack1/Oxc  |
| GO_BP_m2GO:190165cellular res | 3/470  | 126/23843 | 0.453569 | 0.666377 | 0.623882 | Acaca/Bmp  |
| GO_BP_m2GO:004516cell fate co | 6/470  | 274/23843 | 0.455142 | 0.668271 | 0.625655 | Bmp4/Id2/  |
| GO_BP_m2GO:000663acyl-CoA n   | 2/470  | 78/23843  | 0.456716 | 0.668271 | 0.625655 | Acaca/Hmq  |
| GO_BP_m2GO:000694regulation   | 2/470  | 78/23843  | 0.456716 | 0.668271 | 0.625655 | Agrn/Pde4  |
| GO_BP_m2GO:001092negative re  | 2/470  | 78/23843  | 0.456716 | 0.668271 | 0.625655 | Elfn2/Ell  |
| GO_BP_m2GO:003538thioester r  | 2/470  | 78/23843  | 0.456716 | 0.668271 | 0.625655 | Acaca/Hmq  |
| GO_BP_m2GO:004636monosaccl    | 2/470  | 78/23843  | 0.456716 | 0.668271 | 0.625655 | Atf4/Cry1  |
| GO_BP_m2GO:005130establishm   | 2/470  | 78/23843  | 0.456716 | 0.668271 | 0.625655 | Rab11a/Tr  |
| GO_BP_m2GO:007022regulation   | 2/470  | 78/23843  | 0.456716 | 0.668271 | 0.625655 | Aurkb/Bmp  |
| GO_BP_m2GO:190374positive re  | 2/470  | 78/23843  | 0.456716 | 0.668271 | 0.625655 | Pink1/Rac2 |
| GO_BP_m2GO:005500striated m   | 4/470  | 176/23843 | 0.458117 | 0.668271 | 0.625655 | Bmp4/Klhl  |
| GO_BP_m2GO:001574monosaccl    | 3/470  | 127/23843 | 0.458692 | 0.668271 | 0.625655 | Aspscr1/Nr |
| GO_BP_m2GO:003502regulation   | 3/470  | 127/23843 | 0.458692 | 0.668271 | 0.625655 | Arap3/Ect2 |
| GO_BP_m2GO:007132cellular res | 3/470  | 127/23843 | 0.458692 | 0.668271 | 0.625655 | Rack1/Oxc  |
| GO_BP_m2GO:000650GPI anchor   | 1/470  | 31/23843  | 0.46075  | 0.668271 | 0.625655 | Pigm       |
| GO_BP_m2GO:000860attachmen    | 1/470  | 31/23843  | 0.46075  | 0.668271 | 0.625655 | Ect2       |
| GO_BP_m2GO:001071positive re  | 1/470  | 31/23843  | 0.46075  | 0.668271 | 0.625655 | Bmp4       |
| GO_BP_m2GO:001598energy cou   | 1/470  | 31/23843  | 0.46075  | 0.668271 | 0.625655 | Atp6v1h    |
| GO_BP_m2GO:001827protein N-   | 1/470  | 31/23843  | 0.46075  | 0.668271 | 0.625655 | Ube2j1     |
| GO_BP_m2GO:003272positive re  | 1/470  | 31/23843  | 0.46075  | 0.668271 | 0.625655 | Mavs       |
| GO_BP_m2GO:003308regulation   | 1/470  | 31/23843  | 0.46075  | 0.668271 | 0.625655 | Bmp4       |
| GO_BP_m2GO:003336secretory g  | 1/470  | 31/23843  | 0.46075  | 0.668271 | 0.625655 | Zbp        |
| GO_BP_m2GO:004263regulation   | 1/470  | 31/23843  | 0.46075  | 0.668271 | 0.625655 | Dkk4       |

|                                     |           |          |          |          |             |
|-------------------------------------|-----------|----------|----------|----------|-------------|
| GO_BP_m2GO:004274regulation 1/470   | 31/23843  | 0.46075  | 0.668271 | 0.625655 | Csf2        |
| GO_BP_m2GO:004362ncRNA 3'-ε1/470    | 31/23843  | 0.46075  | 0.668271 | 0.625655 | Exosc2      |
| GO_BP_m2GO:004824sperm capε1/470    | 31/23843  | 0.46075  | 0.668271 | 0.625655 | Ropn1l      |
| GO_BP_m2GO:004853lymph nod1/470     | 31/23843  | 0.46075  | 0.668271 | 0.625655 | Id2         |
| GO_BP_m2GO:005095regulation 1/470   | 31/23843  | 0.46075  | 0.668271 | 0.625655 | Ptk2b       |
| GO_BP_m2GO:005115vitamin tra1/470   | 31/23843  | 0.46075  | 0.668271 | 0.625655 | Slc52a3     |
| GO_BP_m2GO:005145positive reε1/470  | 31/23843  | 0.46075  | 0.668271 | 0.625655 | Agrn        |
| GO_BP_m2GO:007052protein kin.1/470  | 31/23843  | 0.46075  | 0.668271 | 0.625655 | Gpd1l       |
| GO_BP_m2GO:009007relaxation ε1/470  | 31/23843  | 0.46075  | 0.668271 | 0.625655 | Pde4d       |
| GO_BP_m2GO:009021positive reε1/470  | 31/23843  | 0.46075  | 0.668271 | 0.625655 | Ptk2b       |
| GO_BP_m2GO:009032regulation 1/470   | 31/23843  | 0.46075  | 0.668271 | 0.625655 | Shc1        |
| GO_BP_m2GO:009050epiboly 1/470      | 31/23843  | 0.46075  | 0.668271 | 0.625655 | Pdcd10      |
| GO_BP_m2GO:190547negative re1/470   | 31/23843  | 0.46075  | 0.668271 | 0.625655 | Csk         |
| GO_BP_m2GO:200046positive reε1/470  | 31/23843  | 0.46075  | 0.668271 | 0.625655 | Ptk2b       |
| GO_BP_m2GO:200075positive reε1/470  | 31/23843  | 0.46075  | 0.668271 | 0.625655 | Auts2       |
| GO_BP_m2GO:005080positive reε7/470  | 326/23843 | 0.46294  | 0.670538 | 0.627778 | Glul/Mir129 |
| GO_BP_m2GO:000320cardiac ver2/470   | 79/23843  | 0.463272 | 0.670538 | 0.627778 | Chd7/Sfrp2  |
| GO_BP_m2GO:003450protein loc2/470   | 79/23843  | 0.463272 | 0.670538 | 0.627778 | Aurkb/Tra2  |
| GO_BP_m2GO:003803signal tranε2/470  | 79/23843  | 0.463272 | 0.670538 | 0.627778 | Col2a1/Csf  |
| GO_BP_m2GO:005000chromosom2/470     | 79/23843  | 0.463272 | 0.670538 | 0.627778 | Rab11a/Tra  |
| GO_BP_m2GO:009715extrinsic aε2/470  | 79/23843  | 0.463272 | 0.670538 | 0.627778 | Col2a1/Csf  |
| GO_BP_m2GO:004362cellular proε3/470 | 128/23843 | 0.463795 | 0.671064 | 0.62827  | 2810006K2   |
| GO_BP_m2GO:000184neural tubε3/470   | 129/23843 | 0.468877 | 0.672093 | 0.629233 | Bmp4/Ift12  |
| GO_BP_m2GO:004867axon exten3/470    | 129/23843 | 0.468877 | 0.672093 | 0.629233 | Auts2/Rab1  |
| GO_BP_m2GO:009753granulocyti3/470   | 129/23843 | 0.468877 | 0.672093 | 0.629233 | Pde4d/Rac   |
| GO_BP_m2GO:000166ameboidal 8/470    | 378/23843 | 0.469378 | 0.672093 | 0.629233 | Angpt4/Bn   |
| GO_BP_m2GO:000315outflow tra2/470   | 80/23843  | 0.469781 | 0.672093 | 0.629233 | Bmp4/Sfrp.  |
| GO_BP_m2GO:000700plasma me2/470     | 80/23843  | 0.469781 | 0.672093 | 0.629233 | Agrn/Syt11  |
| GO_BP_m2GO:001491regulation 2/470   | 80/23843  | 0.469781 | 0.672093 | 0.629233 | Foxo4/Plau  |
| GO_BP_m2GO:001715regulation 2/470   | 80/23843  | 0.469781 | 0.672093 | 0.629233 | Stxbp1/Syt  |
| GO_BP_m2GO:190015positive reε2/470  | 80/23843  | 0.469781 | 0.672093 | 0.629233 | Ect2/Mavs   |
| GO_BP_m2GO:001633morphoge14/470     | 179/23843 | 0.47105  | 0.672093 | 0.629233 | Bmp4/Ift12  |
| GO_BP_m2GO:003135regulation 4/470   | 179/23843 | 0.47105  | 0.672093 | 0.629233 | Cry1/Der1l  |
| GO_BP_m2GO:009752myeloid lei4/470   | 179/23843 | 0.47105  | 0.672093 | 0.629233 | Pde4d/Ptk2  |
| GO_BP_m2GO:000003very long-ε1/470   | 32/23843  | 0.471394 | 0.672093 | 0.629233 | Slc27a2     |
| GO_BP_m2GO:000041protein pe1/470    | 32/23843  | 0.471394 | 0.672093 | 0.629233 | Ppib        |
| GO_BP_m2GO:000605acetyl-CoA1/470    | 32/23843  | 0.471394 | 0.672093 | 0.629233 | Acaca       |
| GO_BP_m2GO:000635regulation 1/470   | 32/23843  | 0.471394 | 0.672093 | 0.629233 | Atf4        |
| GO_BP_m2GO:000650GPI anchor1/470    | 32/23843  | 0.471394 | 0.672093 | 0.629233 | Pigm        |
| GO_BP_m2GO:000675water-solu1/470    | 32/23843  | 0.471394 | 0.672093 | 0.629233 | Pm20d2      |
| GO_BP_m2GO:001004response tr1/470   | 32/23843  | 0.471394 | 0.672093 | 0.629233 | Alad        |
| GO_BP_m2GO:001700cytochromi1/470    | 32/23843  | 0.471394 | 0.672093 | 0.629233 | Cox10       |
| GO_BP_m2GO:001815peptidyl-aε1/470   | 32/23843  | 0.471394 | 0.672093 | 0.629233 | Ube2j1      |
| GO_BP_m2GO:001937epoxygena1/470     | 32/23843  | 0.471394 | 0.672093 | 0.629233 | Cyp2g1      |
| GO_BP_m2GO:002155ventricular 1/470  | 32/23843  | 0.471394 | 0.672093 | 0.629233 | Ak8         |
| GO_BP_m2GO:002241circadian sl1/470  | 32/23843  | 0.471394 | 0.672093 | 0.629233 | Csf2        |
| GO_BP_m2GO:003221positive reε1/470  | 32/23843  | 0.471394 | 0.672093 | 0.629233 | Aurkb       |
| GO_BP_m2GO:003355mammary 1/470      | 32/23843  | 0.471394 | 0.672093 | 0.629233 | Id2         |

|                                      |           |          |          |          |            |
|--------------------------------------|-----------|----------|----------|----------|------------|
| GO_BP_m2GO:00358εenteroendc1/470     | 32/23843  | 0.471394 | 0.672093 | 0.629233 | Bmp4       |
| GO_BP_m2GO:004481mitotic G2/1/470    | 32/23843  | 0.471394 | 0.672093 | 0.629233 | Foxo4      |
| GO_BP_m2GO:004507positive reϕ1/470   | 32/23843  | 0.471394 | 0.672093 | 0.629233 | Ppib       |
| GO_BP_m2GO:004557regulation 1/470    | 32/23843  | 0.471394 | 0.672093 | 0.629233 | Id2        |
| GO_BP_m2GO:004632negative re1/470    | 32/23843  | 0.471394 | 0.672093 | 0.629233 | Sfrp2      |
| GO_BP_m2GO:00486εcollateral sϕ1/470  | 32/23843  | 0.471394 | 0.672093 | 0.629233 | Spq20      |
| GO_BP_m2GO:00508εnegative re1/470    | 32/23843  | 0.471394 | 0.672093 | 0.629233 | Id2        |
| GO_BP_m2GO:005164nucleus loc1/470    | 32/23843  | 0.471394 | 0.672093 | 0.629233 | Cep120     |
| GO_BP_m2GO:006014regulation 1/470    | 32/23843  | 0.471394 | 0.672093 | 0.629233 | Cd53       |
| GO_BP_m2GO:00603Ecartilage dε1/470   | 32/23843  | 0.471394 | 0.672093 | 0.629233 | Col2a1     |
| GO_BP_m2GO:00606εembryonic 1/470     | 32/23843  | 0.471394 | 0.672093 | 0.629233 | Erf        |
| GO_BP_m2GO:00708εDNA-tempϕ1/470      | 32/23843  | 0.471394 | 0.672093 | 0.629233 | Psmc5      |
| GO_BP_m2GO:00860εregulation 1/470    | 32/23843  | 0.471394 | 0.672093 | 0.629233 | Kcnh2      |
| GO_BP_m2GO:190211negative re1/470    | 32/23843  | 0.471394 | 0.672093 | 0.629233 | Pink1      |
| GO_BP_m2GO:190247L-alpha-ar1/470     | 32/23843  | 0.471394 | 0.672093 | 0.629233 | Slc25a38   |
| GO_BP_m2GO:19026εmitochond1/470      | 32/23843  | 0.471394 | 0.672093 | 0.629233 | Bloc1s2    |
| GO_BP_m2GO:19052Cpositive reϕ1/470   | 32/23843  | 0.471394 | 0.672093 | 0.629233 | Bmp4       |
| GO_BP_m2GO:003267regulation 3/470    | 130/23843 | 0.473937 | 0.674802 | 0.63177  | Csk/Mavs/! |
| GO_BP_m2GO:003421carbohydrε3/470     | 130/23843 | 0.473937 | 0.674802 | 0.63177  | Aspscr1/Nr |
| GO_BP_m2GO:19033Cregulation 3/470    | 130/23843 | 0.473937 | 0.674802 | 0.63177  | Rac2/Stxbϕ |
| GO_BP_m2GO:19033εpositive reϕ3/470   | 130/23843 | 0.473937 | 0.674802 | 0.63177  | Rack1/Ptk2 |
| GO_BP_m2GO:00091Epurine ribo9/470    | 430/23843 | 0.47486  | 0.675886 | 0.632785 | Adsl/Rack1 |
| GO_BP_m2GO:00507εpositive reϕ4/470   | 180/23843 | 0.475336 | 0.676334 | 0.633204 | Agrn/Angp  |
| GO_BP_m2GO:000647protein deϕ5/470    | 230/23843 | 0.475784 | 0.676513 | 0.633372 | Pdp1/Pink1 |
| GO_BP_m2GO:00706εregulation 5/470    | 230/23843 | 0.475784 | 0.676513 | 0.633372 | Bmp4/Il12r |
| GO_BP_m2GO:00322Cregulation 2/470    | 81/23843  | 0.476243 | 0.676706 | 0.633553 | Aurkb/Hnri |
| GO_BP_m2GO:19040εnegative re2/470    | 81/23843  | 0.476243 | 0.676706 | 0.633553 | Agrn/Kcnh. |
| GO_BP_m2GO:00423Cmolting cyc3/470    | 131/23843 | 0.478976 | 0.678695 | 0.635414 | Dkk4/Farp2 |
| GO_BP_m2GO:00426εhair cycle 3/470    | 131/23843 | 0.478976 | 0.678695 | 0.635414 | Dkk4/Farp2 |
| GO_BP_m2GO:00064Eprotein folc4/470   | 181/23843 | 0.479608 | 0.678695 | 0.635414 | Emc4/Ppib. |
| GO_BP_m2GO:004877tissue remc4/470    | 181/23843 | 0.479608 | 0.678695 | 0.635414 | Chd7/Csk/l |
| GO_BP_m2GO:00004εmaturation 1/470    | 33/23843  | 0.481828 | 0.678695 | 0.635414 | Exosc2     |
| GO_BP_m2GO:000177myeloid de1/470     | 33/23843  | 0.481828 | 0.678695 | 0.635414 | Csf2       |
| GO_BP_m2GO:00027Ecytoplasmic1/470    | 33/23843  | 0.481828 | 0.678695 | 0.635414 | Mavs       |
| GO_BP_m2GO:00061Ccitrate met 1/470   | 33/23843  | 0.481828 | 0.678695 | 0.635414 | Aco1       |
| GO_BP_m2GO:000627DNA replic1/470     | 33/23843  | 0.481828 | 0.678695 | 0.635414 | Wdr18      |
| GO_BP_m2GO:000761mating be1/470      | 33/23843  | 0.481828 | 0.678695 | 0.635414 | Aplp2      |
| GO_BP_m2GO:00106εnegative re1/470    | 33/23843  | 0.481828 | 0.678695 | 0.635414 | Sfrp2      |
| GO_BP_m2GO:001482response tr1/470    | 33/23843  | 0.481828 | 0.678695 | 0.635414 | Srl        |
| GO_BP_m2GO:00343Eplasma lipc1/470    | 33/23843  | 0.481828 | 0.678695 | 0.635414 | Csk        |
| GO_BP_m2GO:00434C skeletal mu 1/470  | 33/23843  | 0.481828 | 0.678695 | 0.635414 | Plau       |
| GO_BP_m2GO:004804embryonic 1/470     | 33/23843  | 0.481828 | 0.678695 | 0.635414 | Six3       |
| GO_BP_m2GO:00485εembryonic 1/470     | 33/23843  | 0.481828 | 0.678695 | 0.635414 | Id2        |
| GO_BP_m2GO:00519Enegative re1/470    | 33/23843  | 0.481828 | 0.678695 | 0.635414 | Grm7       |
| GO_BP_m2GO:00603εtype I inter 1/470  | 33/23843  | 0.481828 | 0.678695 | 0.635414 | Mavs       |
| GO_BP_m2GO:00607C cell differer1/470 | 33/23843  | 0.481828 | 0.678695 | 0.635414 | Erf        |
| GO_BP_m2GO:006074prostate gl 1/470   | 33/23843  | 0.481828 | 0.678695 | 0.635414 | Bmp4       |
| GO_BP_m2GO:00713Ecellular resϕ1/470  | 33/23843  | 0.481828 | 0.678695 | 0.635414 | Mavs       |

|                                     |           |          |          |          |              |
|-------------------------------------|-----------|----------|----------|----------|--------------|
| GO_BP_m2GO:190074regulation 1/470   | 33/23843  | 0.481828 | 0.678695 | 0.635414 | Gdf6         |
| GO_BP_m2GO:190102positive reç1/470  | 33/23843  | 0.481828 | 0.678695 | 0.635414 | Bmp4         |
| GO_BP_m2GO:190358positive reç1/470  | 33/23843  | 0.481828 | 0.678695 | 0.635414 | Pink1        |
| GO_BP_m2GO:200024regulation 1/470   | 33/23843  | 0.481828 | 0.678695 | 0.635414 | Ptk2b        |
| GO_BP_m2GO:000279regulation 10/470  | 483/23843 | 0.482252 | 0.678695 | 0.635414 | Chd7/Glul/   |
| GO_BP_m2GO:190198regulation 6/470   | 282/23843 | 0.482642 | 0.678695 | 0.635414 | Foxo4/Id2/   |
| GO_BP_m2GO:00302Cglycosamin2/470    | 82/23843  | 0.482656 | 0.678695 | 0.635414 | Chst12/Chs   |
| GO_BP_m2GO:003064regulation 2/470   | 82/23843  | 0.482656 | 0.678695 | 0.635414 | Atp6v1h/G    |
| GO_BP_m2GO:003264regulation 2/470   | 82/23843  | 0.482656 | 0.678695 | 0.635414 | Mavs/Suz1    |
| GO_BP_m2GO:00353Cregulation 2/470   | 82/23843  | 0.482656 | 0.678695 | 0.635414 | Pink1/Ppp1   |
| GO_BP_m2GO:003526organ grov4/470    | 182/23843 | 0.483867 | 0.678979 | 0.635681 | Lats2/Lmx1   |
| GO_BP_m2GO:00439Cnegative re4/470   | 182/23843 | 0.483867 | 0.678979 | 0.635681 | Chmp3/Ma     |
| GO_BP_m2GO:200037regulation 4/470   | 182/23843 | 0.483867 | 0.678979 | 0.635681 | Pink1/Plau   |
| GO_BP_m2GO:000193endothelial3/470   | 132/23843 | 0.483991 | 0.678979 | 0.635681 | Bmp4/Pdca    |
| GO_BP_m2GO:000761memory 3/470       | 132/23843 | 0.483991 | 0.678979 | 0.635681 | Bace1/Grm    |
| GO_BP_m2GO:003121biomineral 3/470   | 132/23843 | 0.483991 | 0.678979 | 0.635681 | Bmp4/Nbr1    |
| GO_BP_m2GO:007188leukocyte ε3/470   | 132/23843 | 0.483991 | 0.678979 | 0.635681 | Aurkb/Bmp    |
| GO_BP_m2GO:199077protein loc 6/470  | 283/23843 | 0.486051 | 0.681642 | 0.638173 | Csk/Fam12    |
| GO_BP_m2GO:005086negative re4/470   | 183/23843 | 0.488112 | 0.683665 | 0.640068 | Bmp4/Id2/    |
| GO_BP_m2GO:005122negative re4/470   | 183/23843 | 0.488112 | 0.683665 | 0.640068 | Csk/Syt11/   |
| GO_BP_m2GO:000858regulation 2/470   | 83/23843  | 0.489021 | 0.683665 | 0.640068 | Ift122/Sall3 |
| GO_BP_m2GO:003243positive reç2/470  | 83/23843  | 0.489021 | 0.683665 | 0.640068 | Rack1/Cop    |
| GO_BP_m2GO:003276positive reç2/470  | 83/23843  | 0.489021 | 0.683665 | 0.640068 | Cybb/Mavs    |
| GO_BP_m2GO:005114positive reç2/470  | 83/23843  | 0.489021 | 0.683665 | 0.640068 | Bmp4/Cd5     |
| GO_BP_m2GO:005501cardiac mu2/470    | 83/23843  | 0.489021 | 0.683665 | 0.640068 | Bmp4/Myh     |
| GO_BP_m2GO:000989positive reç8/470  | 385/23843 | 0.489926 | 0.683665 | 0.640068 | Rack1/Met    |
| GO_BP_m2GO:00182Cpeptidyl-ly 7/470  | 335/23843 | 0.491314 | 0.683665 | 0.640068 | Auts2/Hist   |
| GO_BP_m2GO:00140C oligodendr 1/470  | 34/23843  | 0.492057 | 0.683665 | 0.640068 | Id2          |
| GO_BP_m2GO:001404dopamine 1/470     | 34/23843  | 0.492057 | 0.683665 | 0.640068 | Pink1        |
| GO_BP_m2GO:001405regulation 1/470   | 34/23843  | 0.492057 | 0.683665 | 0.640068 | Pink1        |
| GO_BP_m2GO:003026chromosor 1/470    | 34/23843  | 0.492057 | 0.683665 | 0.640068 | H3f3b        |
| GO_BP_m2GO:003164positive reç1/470  | 34/23843  | 0.492057 | 0.683665 | 0.640068 | Fgfbp3       |
| GO_BP_m2GO:003314negative re1/470   | 34/23843  | 0.492057 | 0.683665 | 0.640068 | Cry1         |
| GO_BP_m2GO:003362regulation 1/470   | 34/23843  | 0.492057 | 0.683665 | 0.640068 | Plau         |
| GO_BP_m2GO:003424regulation 1/470   | 34/23843  | 0.492057 | 0.683665 | 0.640068 | Ell          |
| GO_BP_m2GO:004002regulation 1/470   | 34/23843  | 0.492057 | 0.683665 | 0.640068 | Eif4g3       |
| GO_BP_m2GO:004245ribonucleo:1/470   | 34/23843  | 0.492057 | 0.683665 | 0.640068 | Cad          |
| GO_BP_m2GO:004274circadian sl1/470  | 34/23843  | 0.492057 | 0.683665 | 0.640068 | Csf2         |
| GO_BP_m2GO:004632regulation 1/470   | 34/23843  | 0.492057 | 0.683665 | 0.640068 | Nr4a3        |
| GO_BP_m2GO:005156histone H3 1/470   | 34/23843  | 0.492057 | 0.683665 | 0.640068 | Kdm3a        |
| GO_BP_m2GO:006051prostate gl 1/470  | 34/23843  | 0.492057 | 0.683665 | 0.640068 | Bmp4         |
| GO_BP_m2GO:007028axonemal c 1/470   | 34/23843  | 0.492057 | 0.683665 | 0.640068 | Mss51        |
| GO_BP_m2GO:007139cellular res 1/470 | 34/23843  | 0.492057 | 0.683665 | 0.640068 | Acaca        |
| GO_BP_m2GO:199008response tr1/470   | 34/23843  | 0.492057 | 0.683665 | 0.640068 | Cdc5l        |
| GO_BP_m2GO:199009cellular res 1/470 | 34/23843  | 0.492057 | 0.683665 | 0.640068 | Cdc5l        |
| GO_BP_m2GO:20001Cpositive reç1/470  | 34/23843  | 0.492057 | 0.683665 | 0.640068 | Nr4a3        |
| GO_BP_m2GO:000268regulation 4/470   | 184/23843 | 0.492343 | 0.683837 | 0.640229 | Ptk2b/Rac2   |
| GO_BP_m2GO:000941response tr3/470   | 134/23843 | 0.493952 | 0.685618 | 0.641896 | Aurkb/Mfa    |

|                                     |           |          |          |          |              |
|-------------------------------------|-----------|----------|----------|----------|--------------|
| GO_BP_m2GO:007132cellular res 3/470 | 134/23843 | 0.493952 | 0.685618 | 0.641896 | Rack1/Oxci   |
| GO_BP_m2GO:001049proteasom 9/470    | 437/23843 | 0.494144 | 0.685657 | 0.641933 | Alad/Derl1.  |
| GO_BP_m2GO:014002exocytic pr 2/470  | 84/23843  | 0.495337 | 0.685789 | 0.642056 | Ralb/Stxbp   |
| GO_BP_m2GO:190101regulation 2/470   | 84/23843  | 0.495337 | 0.685789 | 0.642056 | Bmp4/Pde.    |
| GO_BP_m2GO:190355positive reç2/470  | 84/23843  | 0.495337 | 0.685789 | 0.642056 | Cybb/Mav.    |
| GO_BP_m2GO:190595positive reç2/470  | 84/23843  | 0.495337 | 0.685789 | 0.642056 | Acat2/Erfe   |
| GO_BP_m2GO:004327positive reç6/470  | 286/23843 | 0.496236 | 0.685789 | 0.642056 | Bmp4/Erfe.   |
| GO_BP_m2GO:004355skin develo6/470   | 286/23843 | 0.496236 | 0.685789 | 0.642056 | Dkk4/Gpr8    |
| GO_BP_m2GO:000228lymphocyte4/470    | 185/23843 | 0.496559 | 0.685789 | 0.642056 | lfna4/ltfg2/ |
| GO_BP_m2GO:00705C regulation 4/470  | 185/23843 | 0.496559 | 0.685789 | 0.642056 | Agrn/Cep1    |
| GO_BP_m2GO:004639carboxylic ;7/470  | 337/23843 | 0.497561 | 0.685789 | 0.642056 | Acaca/Cad.   |
| GO_BP_m2GO:007233monocarb5/470      | 236/23843 | 0.498303 | 0.685789 | 0.642056 | Acaca/Chst   |
| GO_BP_m2GO:003021keratinocyt3/470   | 135/23843 | 0.498897 | 0.685789 | 0.642056 | Kazn/Lats2   |
| GO_BP_m2GO:004649nicotinamic3/470   | 135/23843 | 0.498897 | 0.685789 | 0.642056 | Cyb5r4/Gp    |
| GO_BP_m2GO:005092positive reç3/470  | 135/23843 | 0.498897 | 0.685789 | 0.642056 | Ptk2b/Rac2   |
| GO_BP_m2GO:00973C response tr3/470  | 135/23843 | 0.498897 | 0.685789 | 0.642056 | Acaca/Alac   |
| GO_BP_m2GO:190406positive reç3/470  | 135/23843 | 0.498897 | 0.685789 | 0.642056 | Bmp4/Kcni    |
| GO_BP_m2GO:005095sensory pe 6/470   | 287/23843 | 0.499615 | 0.685789 | 0.642056 | Chd7/Col2.   |
| GO_BP_m2GO:001605organic aci7/470   | 338/23843 | 0.500676 | 0.685789 | 0.642056 | Acaca/Cad.   |
| GO_BP_m2GO:000956fertilization4/470 | 186/23843 | 0.500761 | 0.685789 | 0.642056 | H3f3b/Izun   |
| GO_BP_m2GO:004353regulation 2/470   | 85/23843  | 0.501602 | 0.685789 | 0.642056 | Angpt4/Pd    |
| GO_BP_m2GO:004547response tr2/470   | 85/23843  | 0.501602 | 0.685789 | 0.642056 | Alad/Mir33   |
| GO_BP_m2GO:004568regulation 2/470   | 85/23843  | 0.501602 | 0.685789 | 0.642056 | Bmp4/Id2     |
| GO_BP_m2GO:004598positive reç2/470  | 85/23843  | 0.501602 | 0.685789 | 0.642056 | Rack1/Pink   |
| GO_BP_m2GO:190054positive reç2/470  | 85/23843  | 0.501602 | 0.685789 | 0.642056 | Rack1/Pink   |
| GO_BP_m2GO:004657regulation 5/470   | 237/23843 | 0.502021 | 0.685789 | 0.642056 | Arap3/Auts   |
| GO_BP_m2GO:00514C stress-activ5/470 | 237/23843 | 0.502021 | 0.685789 | 0.642056 | Gdf6/Nbr1.   |
| GO_BP_m2GO:00015C neurotrans 1/470  | 35/23843  | 0.502084 | 0.685789 | 0.642056 | Slc25a38     |
| GO_BP_m2GO:000682iron ion tra1/470  | 35/23843  | 0.502084 | 0.685789 | 0.642056 | Slc25a28     |
| GO_BP_m2GO:000714female mei1/470    | 35/23843  | 0.502084 | 0.685789 | 0.642056 | Spire2       |
| GO_BP_m2GO:000727neuromusc1/470     | 35/23843  | 0.502084 | 0.685789 | 0.642056 | Stxbp1       |
| GO_BP_m2GO:000995proximal/d 1/470   | 35/23843  | 0.502084 | 0.685789 | 0.642056 | Six3         |
| GO_BP_m2GO:001403Schwann c1/470     | 35/23843  | 0.502084 | 0.685789 | 0.642056 | Adgrg6       |
| GO_BP_m2GO:003142keratinizati1/470  | 35/23843  | 0.502084 | 0.685789 | 0.642056 | Kazn         |
| GO_BP_m2GO:003222regulation 1/470   | 35/23843  | 0.502084 | 0.685789 | 0.642056 | Stxbp1       |
| GO_BP_m2GO:003314positive reç1/470  | 35/23843  | 0.502084 | 0.685789 | 0.642056 | lfna4        |
| GO_BP_m2GO:003577positive reç1/470  | 35/23843  | 0.502084 | 0.685789 | 0.642056 | Oxct1        |
| GO_BP_m2GO:00359C aorta morç1/470   | 35/23843  | 0.502084 | 0.685789 | 0.642056 | Chd7         |
| GO_BP_m2GO:004304ATP-deper1/470     | 35/23843  | 0.502084 | 0.685789 | 0.642056 | Vps72        |
| GO_BP_m2GO:004568positive reç1/470  | 35/23843  | 0.502084 | 0.685789 | 0.642056 | Bmp4         |
| GO_BP_m2GO:004668response tr1/470   | 35/23843  | 0.502084 | 0.685789 | 0.642056 | Alad         |
| GO_BP_m2GO:005169actin filame1/470  | 35/23843  | 0.502084 | 0.685789 | 0.642056 | Twf1         |
| GO_BP_m2GO:006007Wnt signali1/470   | 35/23843  | 0.502084 | 0.685789 | 0.642056 | Sfrp2        |
| GO_BP_m2GO:006044epithelial ti1/470 | 35/23843  | 0.502084 | 0.685789 | 0.642056 | Bmp4         |
| GO_BP_m2GO:009002regulation 1/470   | 35/23843  | 0.502084 | 0.685789 | 0.642056 | Rac2         |
| GO_BP_m2GO:190138positive reç1/470  | 35/23843  | 0.502084 | 0.685789 | 0.642056 | Kcni2        |
| GO_BP_m2GO:190197regulation 1/470   | 35/23843  | 0.502084 | 0.685789 | 0.642056 | Cry1         |
| GO_BP_m2GO:190274apoptotic r1/470   | 35/23843  | 0.502084 | 0.685789 | 0.642056 | Six3         |

|                                            |           |          |          |          |             |
|--------------------------------------------|-----------|----------|----------|----------|-------------|
| GO_BP_m2GO:200017negative re1/470          | 35/23843  | 0.502084 | 0.685789 | 0.642056 | Cit         |
| GO_BP_m2GO:200040positive re1/470          | 35/23843  | 0.502084 | 0.685789 | 0.642056 | Ptk2b       |
| GO_BP_m2GO:003563multicellular3/470        | 136/23843 | 0.503817 | 0.687485 | 0.643644 | Grm7/Kcnf   |
| GO_BP_m2GO:004870embryonic 3/470           | 136/23843 | 0.503817 | 0.687485 | 0.643644 | Bmp4/Col2   |
| GO_BP_m2GO:007233signal trans3/470         | 136/23843 | 0.503817 | 0.687485 | 0.643644 | Dyrk1a/Pck  |
| GO_BP_m2GO:000691phagocytosis4/470         | 187/23843 | 0.504947 | 0.688355 | 0.644458 | Ighv1-23/It |
| GO_BP_m2GO:004470multi-mult4/470           | 187/23843 | 0.504947 | 0.688355 | 0.644458 | Acsl4/H3f3  |
| GO_BP_m2GO:190495negative re4/470          | 187/23843 | 0.504947 | 0.688355 | 0.644458 | Csk/Syt11/  |
| GO_BP_m2GO:004858development5/470          | 238/23843 | 0.505728 | 0.689196 | 0.645246 | Auts2/Gdf9  |
| GO_BP_m2GO:004308regulation 6/470          | 289/23843 | 0.506351 | 0.689821 | 0.645832 | Agrn/Ect2/  |
| GO_BP_m2GO:000165metanephros2/470          | 86/23843  | 0.507818 | 0.690006 | 0.646004 | Bmp4/Id2    |
| GO_BP_m2GO:000616nucleoside 2/470          | 86/23843  | 0.507818 | 0.690006 | 0.646004 | Ak8/Pfkfb2  |
| GO_BP_m2GO:003260chemokine 2/470           | 86/23843  | 0.507818 | 0.690006 | 0.646004 | Mavs/Suz1   |
| GO_BP_m2GO:004434cellular respiration2/470 | 86/23843  | 0.507818 | 0.690006 | 0.646004 | Fgfbp3/Sul  |
| GO_BP_m2GO:005130chromosome 2/470          | 86/23843  | 0.507818 | 0.690006 | 0.646004 | Cit/Espl1   |
| GO_BP_m2GO:190321regulation 2/470          | 86/23843  | 0.507818 | 0.690006 | 0.646004 | Pink1/Rac2  |
| GO_BP_m2GO:006156axon development10/470    | 493/23843 | 0.508213 | 0.690006 | 0.646004 | Agrn/Auts2  |
| GO_BP_m2GO:000726neurotransmission3/470    | 137/23843 | 0.508712 | 0.690006 | 0.646004 | Cplx4/Stxb  |
| GO_BP_m2GO:001936pyridine nucleoside3/470  | 137/23843 | 0.508712 | 0.690006 | 0.646004 | Cyb5r4/Gp   |
| GO_BP_m2GO:003133negative re3/470          | 137/23843 | 0.508712 | 0.690006 | 0.646004 | Dyrk1a/Stx  |
| GO_BP_m2GO:003263interleukin-3/470         | 137/23843 | 0.508712 | 0.690006 | 0.646004 | Csk/Mavs/   |
| GO_BP_m2GO:005512digestive system3/470     | 137/23843 | 0.508712 | 0.690006 | 0.646004 | Bmp4/Id2/   |
| GO_BP_m2GO:009964signal release3/470       | 137/23843 | 0.508712 | 0.690006 | 0.646004 | Cplx4/Stxb  |
| GO_BP_m2GO:000616purine nucleoside9/470    | 443/23843 | 0.510523 | 0.690006 | 0.646004 | Adsl/Rack1  |
| GO_BP_m2GO:000046maturation 1/470          | 36/23843  | 0.511913 | 0.690006 | 0.646004 | Pwp2        |
| GO_BP_m2GO:000663unsaturated1/470          | 36/23843  | 0.511913 | 0.690006 | 0.646004 | Fads1       |
| GO_BP_m2GO:000916nucleoside 1/470          | 36/23843  | 0.511913 | 0.690006 | 0.646004 | Cad         |
| GO_BP_m2GO:000931oligosaccharide1/470      | 36/23843  | 0.511913 | 0.690006 | 0.646004 | Galnt2      |
| GO_BP_m2GO:001009specificity1/470          | 36/23843  | 0.511913 | 0.690006 | 0.646004 | Bmp4        |
| GO_BP_m2GO:001083positive re1/470          | 36/23843  | 0.511913 | 0.690006 | 0.646004 | Cd53        |
| GO_BP_m2GO:003081positive re1/470          | 36/23843  | 0.511913 | 0.690006 | 0.646004 | Rack1       |
| GO_BP_m2GO:003511embryonic 1/470           | 36/23843  | 0.511913 | 0.690006 | 0.646004 | Ift122      |
| GO_BP_m2GO:003530positive re1/470          | 36/23843  | 0.511913 | 0.690006 | 0.646004 | Pink1       |
| GO_BP_m2GO:004298amyloid precursor1/470    | 36/23843  | 0.511913 | 0.690006 | 0.646004 | Dyrk1a      |
| GO_BP_m2GO:004476multi-organ1/470          | 36/23843  | 0.511913 | 0.690006 | 0.646004 | Mavs        |
| GO_BP_m2GO:004683lipid phospholipid1/470   | 36/23843  | 0.511913 | 0.690006 | 0.646004 | Fam126a     |
| GO_BP_m2GO:004816regulation 1/470          | 36/23843  | 0.511913 | 0.690006 | 0.646004 | Rab11a      |
| GO_BP_m2GO:004871regulation 1/470          | 36/23843  | 0.511913 | 0.690006 | 0.646004 | Id2         |
| GO_BP_m2GO:004882erythrocyte1/470          | 36/23843  | 0.511913 | 0.690006 | 0.646004 | Jmjd6       |
| GO_BP_m2GO:005129establishment1/470        | 36/23843  | 0.511913 | 0.690006 | 0.646004 | Spire2      |
| GO_BP_m2GO:008600regulation 1/470          | 36/23843  | 0.511913 | 0.690006 | 0.646004 | Pde4d       |
| GO_BP_m2GO:009702dendritic cell1/470       | 36/23843  | 0.511913 | 0.690006 | 0.646004 | Csf2        |
| GO_BP_m2GO:009748dendrite extension1/470   | 36/23843  | 0.511913 | 0.690006 | 0.646004 | Auts2       |
| GO_BP_m2GO:009719intrinsic apoptosis6/470  | 291/23843 | 0.513054 | 0.6909   | 0.646841 | Atf4/Casp1  |
| GO_BP_m2GO:004816regulation 7/470          | 342/23843 | 0.513071 | 0.6909   | 0.646841 | Bace1/Mir1  |
| GO_BP_m2GO:005132meiotic cell7/470         | 342/23843 | 0.513071 | 0.6909   | 0.646841 | Eif4g3/Espl |
| GO_BP_m2GO:000150action potential3/470     | 138/23843 | 0.513582 | 0.691019 | 0.646953 | Gpd1l/Kcnl  |
| GO_BP_m2GO:000722smooth muscle3/470        | 138/23843 | 0.513582 | 0.691019 | 0.646953 | 2700049AC   |



|                                    |           |          |          |          |              |
|------------------------------------|-----------|----------|----------|----------|--------------|
| GO_BP_m2GO:00149Csmooth m2/470     | 87/23843  | 0.513982 | 0.691019 | 0.646953 | Foxo4/Plau   |
| GO_BP_m2GO:002187forebrain g2/470  | 87/23843  | 0.513982 | 0.691019 | 0.646953 | Mettl14/Sa   |
| GO_BP_m2GO:004632glucose im2/470   | 87/23843  | 0.513982 | 0.691019 | 0.646953 | Aspscr1/Uq   |
| GO_BP_m2GO:005077regulation 4/470  | 190/23843 | 0.51741  | 0.694295 | 0.65002  | Agrn/Rab1    |
| GO_BP_m2GO:00076Cvisual perc3/470  | 139/23843 | 0.518426 | 0.694295 | 0.65002  | Col2a1/Irx5  |
| GO_BP_m2GO:002176limbic syst2/470  | 88/23843  | 0.520096 | 0.694295 | 0.65002  | Nr4a3/Zbt    |
| GO_BP_m2GO:003059neutrophil 2/470  | 88/23843  | 0.520096 | 0.694295 | 0.65002  | Pde4d/Rac    |
| GO_BP_m2GO:003296collagen m2/470   | 88/23843  | 0.520096 | 0.694295 | 0.65002  | Bmp4/Mfaj    |
| GO_BP_m2GO:00435Cregulation 2/470  | 88/23843  | 0.520096 | 0.694295 | 0.65002  | Ptk2b/Sfrp:  |
| GO_BP_m2GO:004693nucleotide 2/470  | 88/23843  | 0.520096 | 0.694295 | 0.65002  | Ak8/Pfkfb2   |
| GO_BP_m2GO:007177response tr2/470  | 88/23843  | 0.520096 | 0.694295 | 0.65002  | Fgfbp3/Sul   |
| GO_BP_m2GO:007267lymphocyte2/470   | 88/23843  | 0.520096 | 0.694295 | 0.65002  | Myo1g/Ptk    |
| GO_BP_m2GO:190401positive re4/470  | 191/23843 | 0.521532 | 0.694295 | 0.65002  | Angpt4/Cy    |
| GO_BP_m2GO:000194postsynapt1/470   | 37/23843  | 0.521549 | 0.694295 | 0.65002  | Agrn         |
| GO_BP_m2GO:000288positive re1/470  | 37/23843  | 0.521549 | 0.694295 | 0.65002  | Stxbp1       |
| GO_BP_m2GO:000673NADP met:1/470    | 37/23843  | 0.521549 | 0.694295 | 0.65002  | Cyb5r4       |
| GO_BP_m2GO:000808anterograd1/470   | 37/23843  | 0.521549 | 0.694295 | 0.65002  | Bloc1s2      |
| GO_BP_m2GO:002188forebrain n1/470  | 37/23843  | 0.521549 | 0.694295 | 0.65002  | Sall3        |
| GO_BP_m2GO:00305Cpositive re1/470  | 37/23843  | 0.521549 | 0.694295 | 0.65002  | Bmp4         |
| GO_BP_m2GO:003051positive re1/470  | 37/23843  | 0.521549 | 0.694295 | 0.65002  | Bmp4         |
| GO_BP_m2GO:003313regulation 1/470  | 37/23843  | 0.521549 | 0.694295 | 0.65002  | Ifna4        |
| GO_BP_m2GO:00358Eepithelial c1/470 | 37/23843  | 0.521549 | 0.694295 | 0.65002  | Bmp4         |
| GO_BP_m2GO:00456Cregulation 1/470  | 37/23843  | 0.521549 | 0.694295 | 0.65002  | Bmp4         |
| GO_BP_m2GO:004573positive re1/470  | 37/23843  | 0.521549 | 0.694295 | 0.65002  | Cks1b        |
| GO_BP_m2GO:006109positive re1/470  | 37/23843  | 0.521549 | 0.694295 | 0.65002  | Agrn         |
| GO_BP_m2GO:008606cell commu1/470   | 37/23843  | 0.521549 | 0.694295 | 0.65002  | Pde4d        |
| GO_BP_m2GO:009004regulation 1/470  | 37/23843  | 0.521549 | 0.694295 | 0.65002  | Pdcd10       |
| GO_BP_m2GO:009017regulation 1/470  | 37/23843  | 0.521549 | 0.694295 | 0.65002  | Sfrp2        |
| GO_BP_m2GO:190106guanosine-1/470   | 37/23843  | 0.521549 | 0.694295 | 0.65002  | Ran          |
| GO_BP_m2GO:19021Cregulation 1/470  | 37/23843  | 0.521549 | 0.694295 | 0.65002  | Bloc1s2      |
| GO_BP_m2GO:190262positive re1/470  | 37/23843  | 0.521549 | 0.694295 | 0.65002  | Rac2         |
| GO_BP_m2GO:190289regulation 1/470  | 37/23843  | 0.521549 | 0.694295 | 0.65002  | Bmp4         |
| GO_BP_m2GO:190533positive re1/470  | 37/23843  | 0.521549 | 0.694295 | 0.65002  | Bmp4         |
| GO_BP_m2GO:200082regulation 1/470  | 37/23843  | 0.521549 | 0.694295 | 0.65002  | Bmp4         |
| GO_BP_m2GO:00720Cnephron d3/470    | 140/23843 | 0.523245 | 0.696332 | 0.651927 | Bmp4/Notc    |
| GO_BP_m2GO:00109Eregulation 8/470  | 397/23843 | 0.524613 | 0.697932 | 0.653424 | Agrn/Atf4/   |
| GO_BP_m2GO:00033Ccardiac mu2/470   | 89/23843  | 0.526158 | 0.6991   | 0.654518 | Nr4a3/Twf:   |
| GO_BP_m2GO:000666glycolipid r2/470 | 89/23843  | 0.526158 | 0.6991   | 0.654518 | Gba2/Pigr    |
| GO_BP_m2GO:000758response tr2/470  | 89/23843  | 0.526158 | 0.6991   | 0.654518 | Adsl/Alad    |
| GO_BP_m2GO:00550Ccardiac cell2/470 | 89/23843  | 0.526158 | 0.6991   | 0.654518 | Bmp4/Myh     |
| GO_BP_m2GO:000283regulation 3/470  | 141/23843 | 0.528036 | 0.700646 | 0.655966 | Il12rb1/Ma   |
| GO_BP_m2GO:001097transport a3/470  | 141/23843 | 0.528036 | 0.700646 | 0.655966 | Bloc1s2/lft: |
| GO_BP_m2GO:004273drug catab3/470   | 141/23843 | 0.528036 | 0.700646 | 0.655966 | Cyp2g1/O>    |
| GO_BP_m2GO:009911microtubul3/470   | 141/23843 | 0.528036 | 0.700646 | 0.655966 | Bloc1s2/lft: |
| GO_BP_m2GO:000726Rho proteii4/470  | 193/23843 | 0.529726 | 0.700646 | 0.655966 | Arap3/Ect2   |
| GO_BP_m2GO:003059leukocyte c4/470  | 193/23843 | 0.529726 | 0.700646 | 0.655966 | Pde4d/Ptk:   |
| GO_BP_m2GO:000196synaptic tr1/470  | 38/23843  | 0.530995 | 0.700646 | 0.655966 | Pink1        |
| GO_BP_m2GO:000272positive re1/470  | 38/23843  | 0.530995 | 0.700646 | 0.655966 | Nr4a3        |

|                                                  |           |          |          |          |                 |
|--------------------------------------------------|-----------|----------|----------|----------|-----------------|
| GO_BP_m2GO:00094C response to 1/470              | 38/23843  | 0.530995 | 0.700646 | 0.655966 | Ucp2            |
| GO_BP_m2GO:003081 regulation 1/470               | 38/23843  | 0.530995 | 0.700646 | 0.655966 | Rack1           |
| GO_BP_m2GO:00447E cell cycle D1/470              | 38/23843  | 0.530995 | 0.700646 | 0.655966 | Wdr18           |
| GO_BP_m2GO:00455E negative regulation 1/470      | 38/23843  | 0.530995 | 0.700646 | 0.655966 | Bmp4            |
| GO_BP_m2GO:00487E calcium ion 1/470              | 38/23843  | 0.530995 | 0.700646 | 0.655966 | Syt11           |
| GO_BP_m2GO:007221 metanephros 1/470              | 38/23843  | 0.530995 | 0.700646 | 0.655966 | Bmp4            |
| GO_BP_m2GO:00723E tricarboxylic acid 1/470       | 38/23843  | 0.530995 | 0.700646 | 0.655966 | Aco1            |
| GO_BP_m2GO:00725E maintenance of 1/470           | 38/23843  | 0.530995 | 0.700646 | 0.655966 | Pink1           |
| GO_BP_m2GO:00860C membrane 1/470                 | 38/23843  | 0.530995 | 0.700646 | 0.655966 | Kcnh2           |
| GO_BP_m2GO:009712 receptor ligand 1/470          | 38/23843  | 0.530995 | 0.700646 | 0.655966 | Rab11a          |
| GO_BP_m2GO:19016E glycosylation 1/470            | 38/23843  | 0.530995 | 0.700646 | 0.655966 | Cad             |
| GO_BP_m2GO:19019E positive regulation 1/470      | 38/23843  | 0.530995 | 0.700646 | 0.655966 | Auts2           |
| GO_BP_m2GO:20000C regulation 1/470               | 38/23843  | 0.530995 | 0.700646 | 0.655966 | Gpd1l           |
| GO_BP_m2GO:200102 positive regulation 1/470      | 38/23843  | 0.530995 | 0.700646 | 0.655966 | Pink1           |
| GO_BP_m2GO:00353C negative regulation 2/470      | 90/23843  | 0.532168 | 0.701312 | 0.656589 | Elfn2/Elf1      |
| GO_BP_m2GO:005084 regulation 2/470               | 90/23843  | 0.532168 | 0.701312 | 0.656589 | Pde4d/Ptk2      |
| GO_BP_m2GO:00714E cellular response 2/470        | 90/23843  | 0.532168 | 0.701312 | 0.656589 | Cybb/Pink1      |
| GO_BP_m2GO:19035C liposaccharide 2/470           | 90/23843  | 0.532168 | 0.701312 | 0.656589 | Gba2/Pigra      |
| GO_BP_m2GO:00073E single fertilization 3/470     | 142/23843 | 0.532801 | 0.701463 | 0.656731 | H3f3b/Izumo1    |
| GO_BP_m2GO:000914 nucleoside 3/470               | 142/23843 | 0.532801 | 0.701463 | 0.656731 | Ak8/Cad/Pink1   |
| GO_BP_m2GO:007252 pyridine-oxalate 3/470         | 142/23843 | 0.532801 | 0.701463 | 0.656731 | Cyb5r4/Gp       |
| GO_BP_m2GO:001604 lipid catabolism 6/470         | 297/23843 | 0.532952 | 0.701463 | 0.656731 | Acat2/Echc      |
| GO_BP_m2GO:003134 negative regulation 4/470      | 194/23843 | 0.533797 | 0.702356 | 0.657566 | Cit/Prkcs/Prkch |
| GO_BP_m2GO:001067 regulation 3/470               | 143/23843 | 0.537539 | 0.705543 | 0.660055 | Fgl1/Pfkfb2     |
| GO_BP_m2GO:00509E sensory perception 3/470       | 143/23843 | 0.537539 | 0.705543 | 0.660055 | Col2a1/Irf5     |
| GO_BP_m2GO:20000E regulation 3/470               | 143/23843 | 0.537539 | 0.705543 | 0.660055 | Rack1/Ptk2      |
| GO_BP_m2GO:004544 myoblast differentiation 2/470 | 91/23843  | 0.538126 | 0.705543 | 0.660055 | Bmp4/Klhlk1     |
| GO_BP_m2GO:190374 regulation 2/470               | 91/23843  | 0.538126 | 0.705543 | 0.660055 | Pink1/Rac2      |
| GO_BP_m2GO:000762 locomotion 5/470               | 247/23843 | 0.538577 | 0.705543 | 0.660055 | Aplp2/Chd1      |
| GO_BP_m2GO:000271 positive regulation 1/470      | 39/23843  | 0.540255 | 0.705543 | 0.660055 | Zbtb1           |
| GO_BP_m2GO:000317 heart valve 1/470              | 39/23843  | 0.540255 | 0.705543 | 0.660055 | Bmp4            |
| GO_BP_m2GO:00066E glycosphingolipid 1/470        | 39/23843  | 0.540255 | 0.705543 | 0.660055 | Gba2            |
| GO_BP_m2GO:00304E sleep 1/470                    | 39/23843  | 0.540255 | 0.705543 | 0.660055 | Csf2            |
| GO_BP_m2GO:003107 embryonic 1/470                | 39/23843  | 0.540255 | 0.705543 | 0.660055 | Six3            |
| GO_BP_m2GO:003157 G2 DNA damage 1/470            | 39/23843  | 0.540255 | 0.705543 | 0.660055 | Foxo4           |
| GO_BP_m2GO:003287 negative regulation 1/470      | 39/23843  | 0.540255 | 0.705543 | 0.660055 | Sfrp2           |
| GO_BP_m2GO:003434 response to 1/470              | 39/23843  | 0.540255 | 0.705543 | 0.660055 | Mavs            |
| GO_BP_m2GO:00435E regulation 1/470               | 39/23843  | 0.540255 | 0.705543 | 0.660055 | Ptk2b           |
| GO_BP_m2GO:004824 macrophage 1/470               | 39/23843  | 0.540255 | 0.705543 | 0.660055 | Ptk2b           |
| GO_BP_m2GO:004874 skeletal muscle 1/470          | 39/23843  | 0.540255 | 0.705543 | 0.660055 | Klhl41          |
| GO_BP_m2GO:006032 face morphology 1/470          | 39/23843  | 0.540255 | 0.705543 | 0.660055 | Sgpl1           |
| GO_BP_m2GO:00703C negative regulation 1/470      | 39/23843  | 0.540255 | 0.705543 | 0.660055 | Sfrp2           |
| GO_BP_m2GO:007152 semaphorin 1/470               | 39/23843  | 0.540255 | 0.705543 | 0.660055 | Farp2           |
| GO_BP_m2GO:00970C energy homeostasis 1/470       | 39/23843  | 0.540255 | 0.705543 | 0.660055 | Nr4a3           |
| GO_BP_m2GO:19029E regulation 1/470               | 39/23843  | 0.540255 | 0.705543 | 0.660055 | Ptk2b           |
| GO_BP_m2GO:190352 negative regulation 1/470      | 39/23843  | 0.540255 | 0.705543 | 0.660055 | Pde4d           |
| GO_BP_m2GO:190357 negative regulation 1/470      | 39/23843  | 0.540255 | 0.705543 | 0.660055 | Ube2j1          |
| GO_BP_m2GO:004887 multicellularity 7/470         | 351/23843 | 0.540549 | 0.705707 | 0.660704 | Acaca/Col2      |

|                                     |           |          |          |          |             |
|-------------------------------------|-----------|----------|----------|----------|-------------|
| GO_BP_m2GO:000004autophago2/470     | 92/23843  | 0.544031 | 0.70937  | 0.664134 | Pink1/Ralb  |
| GO_BP_m2GO:000202regulation 2/470   | 92/23843  | 0.544031 | 0.70937  | 0.664134 | Agrn/Gpd1   |
| GO_BP_m2GO:001485striated m2/470    | 92/23843  | 0.544031 | 0.70937  | 0.664134 | Nr4a3/Twf:  |
| GO_BP_m2GO:004688negative re2/470   | 92/23843  | 0.544031 | 0.70937  | 0.664134 | Cry1/Ucp2   |
| GO_BP_m2GO:003164regulation 5/470   | 249/23843 | 0.54574  | 0.71137  | 0.666006 | Derl1/Pdcc  |
| GO_BP_m2GO:190304meiotic cel4/470   | 197/23843 | 0.545904 | 0.71137  | 0.666006 | Eif4g3/Espl |
| GO_BP_m2GO:190165response tr7/470   | 353/23843 | 0.54657  | 0.712017 | 0.666612 | Cad/Cry1/C  |
| GO_BP_m2GO:000683neurotrans5/470    | 250/23843 | 0.549302 | 0.712159 | 0.666744 | Cplx4/Csf2  |
| GO_BP_m2GO:004819Golgi vesic5/470   | 250/23843 | 0.549302 | 0.712159 | 0.666744 | Csk/Rack1/  |
| GO_BP_m2GO:011005regulation 5/470   | 250/23843 | 0.549302 | 0.712159 | 0.666744 | Cit/Ptk2b/F |
| GO_BP_m2GO:000178B cell apop1/470   | 40/23843  | 0.549332 | 0.712159 | 0.666744 | Aurkb       |
| GO_BP_m2GO:000315regulation 1/470   | 40/23843  | 0.549332 | 0.712159 | 0.666744 | Bmp4        |
| GO_BP_m2GO:000911nucleobase1/470    | 40/23843  | 0.549332 | 0.712159 | 0.666744 | Cad         |
| GO_BP_m2GO:003051negative re1/470   | 40/23843  | 0.549332 | 0.712159 | 0.666744 | Rnf6        |
| GO_BP_m2GO:003083negative re1/470   | 40/23843  | 0.549332 | 0.712159 | 0.666744 | Twf1        |
| GO_BP_m2GO:003245regulation 1/470   | 40/23843  | 0.549332 | 0.712159 | 0.666744 | Rack1       |
| GO_BP_m2GO:003541protein loc1/470   | 40/23843  | 0.549332 | 0.712159 | 0.666744 | Rab11a      |
| GO_BP_m2GO:003806p38MAPK 1/470      | 40/23843  | 0.549332 | 0.712159 | 0.666744 | Gdf6        |
| GO_BP_m2GO:007083bicellular ti1/470 | 40/23843  | 0.549332 | 0.712159 | 0.666744 | Ect2        |
| GO_BP_m2GO:190403positive re1/470   | 40/23843  | 0.549332 | 0.712159 | 0.666744 | Cks1b       |
| GO_BP_m2GO:200072regulation 1/470   | 40/23843  | 0.549332 | 0.712159 | 0.666744 | Bmp4        |
| GO_BP_m2GO:000157vasculogen2/470    | 93/23843  | 0.549884 | 0.712159 | 0.666744 | Sgpl1/War:  |
| GO_BP_m2GO:002178glial cell de2/470 | 93/23843  | 0.549884 | 0.712159 | 0.666744 | Adgrg6/Id2  |
| GO_BP_m2GO:004864muscle org2/470    | 93/23843  | 0.549884 | 0.712159 | 0.666744 | Chd7/Serp   |
| GO_BP_m2GO:190547positive re2/470   | 93/23843  | 0.549884 | 0.712159 | 0.666744 | Rack1/Rab:  |
| GO_BP_m2GO:003298protein-co4/470    | 198/23843 | 0.549903 | 0.712159 | 0.666744 | 2810006K2   |
| GO_BP_m2GO:001571monocarbc3/470     | 146/23843 | 0.551585 | 0.713676 | 0.668165 | Acsl4/Erfe/ |
| GO_BP_m2GO:002261gland mor13/470    | 146/23843 | 0.551585 | 0.713676 | 0.668165 | Bmp4/Plau   |
| GO_BP_m2GO:009953presynaptic3/470   | 146/23843 | 0.551585 | 0.713676 | 0.668165 | Cplx4/Stxb  |
| GO_BP_m2GO:200002regulation 4/470   | 199/23843 | 0.553884 | 0.716092 | 0.670427 | Bmp4/Plau   |
| GO_BP_m2GO:000195regulation 2/470   | 94/23843  | 0.555683 | 0.716092 | 0.670427 | Mavs/Palm   |
| GO_BP_m2GO:001489muscle hyp2/470    | 94/23843  | 0.555683 | 0.716092 | 0.670427 | Nr4a3/Twf:  |
| GO_BP_m2GO:001701regulation 2/470   | 94/23843  | 0.555683 | 0.716092 | 0.670427 | Bambi/Tgft  |
| GO_BP_m2GO:003241positive re2/470   | 94/23843  | 0.555683 | 0.716092 | 0.670427 | Bmp4/Pink   |
| GO_BP_m2GO:003355multicellul2/470   | 94/23843  | 0.555683 | 0.716092 | 0.670427 | Grm7/Penk   |
| GO_BP_m2GO:004563negative re2/470   | 94/23843  | 0.555683 | 0.716092 | 0.670427 | Mafb/Ptk2l  |
| GO_BP_m2GO:000756cell aging 3/470   | 147/23843 | 0.556211 | 0.716092 | 0.670427 | Id2/Mirlet7 |
| GO_BP_m2GO:002154pallium dev3/470   | 147/23843 | 0.556211 | 0.716092 | 0.670427 | Cep120/Nr   |
| GO_BP_m2GO:000018activation 1/470   | 41/23843  | 0.558231 | 0.716092 | 0.670427 | Bmp4        |
| GO_BP_m2GO:000196positive re1/470   | 41/23843  | 0.558231 | 0.716092 | 0.670427 | Mavs        |
| GO_BP_m2GO:000650membrane1/470      | 41/23843  | 0.558231 | 0.716092 | 0.670427 | Bace1       |
| GO_BP_m2GO:000733binding of 1/470   | 41/23843  | 0.558231 | 0.716092 | 0.670427 | Zbp         |
| GO_BP_m2GO:001047regulation 1/470   | 41/23843  | 0.558231 | 0.716092 | 0.670427 | Sfrp2       |
| GO_BP_m2GO:001051positive re1/470   | 41/23843  | 0.558231 | 0.716092 | 0.670427 | Sele        |
| GO_BP_m2GO:001076positive re1/470   | 41/23843  | 0.558231 | 0.716092 | 0.670427 | Gpd1l       |
| GO_BP_m2GO:001967NAD metal1/470     | 41/23843  | 0.558231 | 0.716092 | 0.670427 | Gpd1l       |
| GO_BP_m2GO:003237regulation 1/470   | 41/23843  | 0.558231 | 0.716092 | 0.670427 | Acat2       |
| GO_BP_m2GO:003237regulation 1/470   | 41/23843  | 0.558231 | 0.716092 | 0.670427 | Acat2       |

|                                     |           |          |          |          |             |
|-------------------------------------|-----------|----------|----------|----------|-------------|
| GO_BP_m2GO:003281regulation 1/470   | 41/23843  | 0.558231 | 0.716092 | 0.670427 | Zbtb1       |
| GO_BP_m2GO:003292activin rece1/470  | 41/23843  | 0.558231 | 0.716092 | 0.670427 | Gdf6        |
| GO_BP_m2GO:003296regulation 1/470   | 41/23843  | 0.558231 | 0.716092 | 0.670427 | Bmp4        |
| GO_BP_m2GO:004549photorecep1/470    | 41/23843  | 0.558231 | 0.716092 | 0.670427 | Crocc       |
| GO_BP_m2GO:004592positive rec1/470  | 41/23843  | 0.558231 | 0.716092 | 0.670427 | Nr4a3       |
| GO_BP_m2GO:004749vesicle tran1/470  | 41/23843  | 0.558231 | 0.716092 | 0.670427 | Bloc1s2     |
| GO_BP_m2GO:005159positive rec1/470  | 41/23843  | 0.558231 | 0.716092 | 0.670427 | Stxbp1      |
| GO_BP_m2GO:005165spindle loc.1/470  | 41/23843  | 0.558231 | 0.716092 | 0.670427 | Spire2      |
| GO_BP_m2GO:190266regulation 1/470   | 41/23843  | 0.558231 | 0.716092 | 0.670427 | Agrn        |
| GO_BP_m2GO:190199regulation 5/470   | 253/23843 | 0.559907 | 0.718023 | 0.672234 | Foxo4/Id2/  |
| GO_BP_m2GO:005114regulation 3/470   | 148/23843 | 0.560809 | 0.718438 | 0.672623 | Bmp4/Cd5    |
| GO_BP_m2GO:000911nucleoside 2/470   | 95/23843  | 0.56143  | 0.718438 | 0.672623 | Cad/Ran     |
| GO_BP_m2GO:000979axis specific2/470 | 95/23843  | 0.56143  | 0.718438 | 0.672623 | Bmp4/Six3   |
| GO_BP_m2GO:003164regulation 2/470   | 95/23843  | 0.56143  | 0.718438 | 0.672623 | Fgfbp3/Mt   |
| GO_BP_m2GO:004592positive rec2/470  | 95/23843  | 0.56143  | 0.718438 | 0.672623 | Stxbp1/Tsc  |
| GO_BP_m2GO:004870oligodendr2/470    | 95/23843  | 0.56143  | 0.718438 | 0.672623 | Bmp4/Id2    |
| GO_BP_m2GO:006105somite dev2/470    | 95/23843  | 0.56143  | 0.718438 | 0.672623 | Lfng/Sfrp2  |
| GO_BP_m2GO:003158cell-substr6/470   | 306/23843 | 0.562139 | 0.718469 | 0.672652 | Myo1g/Pla   |
| GO_BP_m2GO:004648glycerolipic6/470  | 306/23843 | 0.562139 | 0.718469 | 0.672652 | Acsl4/Cdip  |
| GO_BP_m2GO:004665lymphocyt6/470     | 306/23843 | 0.562139 | 0.718469 | 0.672652 | Bmp4/Ifna4  |
| GO_BP_m2GO:004887homeostas6/470     | 306/23843 | 0.562139 | 0.718469 | 0.672652 | Bmp4/Id2/   |
| GO_BP_m2GO:000669steroid bio3/470   | 149/23843 | 0.565377 | 0.719144 | 0.673284 | Sc5d/Sdr42  |
| GO_BP_m2GO:000693regulation 3/470   | 149/23843 | 0.565377 | 0.719144 | 0.673284 | Agrn/Pde4   |
| GO_BP_m2GO:190547regulation 3/470   | 149/23843 | 0.565377 | 0.719144 | 0.673284 | Csk/Rack1/  |
| GO_BP_m2GO:005092regulation 4/470   | 202/23843 | 0.565714 | 0.719144 | 0.673284 | Agrn/Ptk2k  |
| GO_BP_m2GO:009865anion trans4/470   | 202/23843 | 0.565714 | 0.719144 | 0.673284 | Slc6a21/Slc |
| GO_BP_m2GO:001648protein prc5/470   | 255/23843 | 0.566908 | 0.719144 | 0.673284 | Metap2/Pc   |
| GO_BP_m2GO:000095mitochond1/470     | 42/23843  | 0.566954 | 0.719144 | 0.673284 | Wars2       |
| GO_BP_m2GO:000319endocardia1/470    | 42/23843  | 0.566954 | 0.719144 | 0.673284 | Bmp4        |
| GO_BP_m2GO:000695acute-phas1/470    | 42/23843  | 0.566954 | 0.719144 | 0.673284 | Serpina1b   |
| GO_BP_m2GO:000708mitotic me1/470    | 42/23843  | 0.566954 | 0.719144 | 0.673284 | Rab11a      |
| GO_BP_m2GO:001097negative re1/470   | 42/23843  | 0.566954 | 0.719144 | 0.673284 | Foxo4       |
| GO_BP_m2GO:001692protein sur1/470   | 42/23843  | 0.566954 | 0.719144 | 0.673284 | Tollip      |
| GO_BP_m2GO:001820peptidyl-pi1/470   | 42/23843  | 0.566954 | 0.719144 | 0.673284 | Ppib        |
| GO_BP_m2GO:003105negative re1/470   | 42/23843  | 0.566954 | 0.719144 | 0.673284 | Kdm3a       |
| GO_BP_m2GO:003157spindle che1/470   | 42/23843  | 0.566954 | 0.719144 | 0.673284 | Aurkb       |
| GO_BP_m2GO:003276regulation 1/470   | 42/23843  | 0.566954 | 0.719144 | 0.673284 | Ptk2b       |
| GO_BP_m2GO:003305cellular pig1/470  | 42/23843  | 0.566954 | 0.719144 | 0.673284 | Rab11a      |
| GO_BP_m2GO:004250serine phos1/470   | 42/23843  | 0.566954 | 0.719144 | 0.673284 | Ifna4       |
| GO_BP_m2GO:005189negative re1/470   | 42/23843  | 0.566954 | 0.719144 | 0.673284 | Rack1       |
| GO_BP_m2GO:006013maternal p1/470    | 42/23843  | 0.566954 | 0.719144 | 0.673284 | Prl8a2      |
| GO_BP_m2GO:007016positive rec1/470  | 42/23843  | 0.566954 | 0.719144 | 0.673284 | Bmp4        |
| GO_BP_m2GO:190372positive rec1/470  | 42/23843  | 0.566954 | 0.719144 | 0.673284 | Ptk2b       |
| GO_BP_m2GO:000245T cell medi2/470   | 96/23843  | 0.567123 | 0.719144 | 0.673284 | Myo1g/Zbt   |
| GO_BP_m2GO:014005mitochond2/470     | 96/23843  | 0.567123 | 0.719144 | 0.673284 | 2810006K2   |
| GO_BP_m2GO:190384regulation 2/470   | 96/23843  | 0.567123 | 0.719144 | 0.673284 | Bambi/Tgft  |
| GO_BP_m2GO:190503autophago2/470     | 96/23843  | 0.567123 | 0.719144 | 0.673284 | Pink1/Ralb  |
| GO_BP_m2GO:003294mononucl6/470      | 308/23843 | 0.568508 | 0.720682 | 0.674724 | Bmp4/Ifna4  |

|                   |              |        |           |          |          |          |             |
|-------------------|--------------|--------|-----------|----------|----------|----------|-------------|
| GO_BP_m2GO:003287 | positive re  | 3/470  | 150/23843 | 0.569916 | 0.72225  | 0.676192 | Gdf6/Pdcd   |
| GO_BP_m2GO:00516C | protein ma   | 6/470  | 309/23843 | 0.571675 | 0.723434 | 0.6773   | Ambp/Met    |
| GO_BP_m2GO:00068E | regulation   | 2/470  | 97/23843  | 0.572762 | 0.723434 | 0.6773   | Atp6v1h/G   |
| GO_BP_m2GO:00347E | negative re  | 2/470  | 97/23843  | 0.572762 | 0.723434 | 0.6773   | Agrn/Kcnh   |
| GO_BP_m2GO:004312 | positive re  | 2/470  | 97/23843  | 0.572762 | 0.723434 | 0.6773   | Pink1/Tme   |
| GO_BP_m2GO:00487E | mesenchyr    | 4/470  | 204/23843 | 0.573503 | 0.723434 | 0.6773   | Bambi/Bmp   |
| GO_BP_m2GO:00018E | embryonic    | 3/470  | 151/23843 | 0.574426 | 0.723434 | 0.6773   | Bmp4/Ift12  |
| GO_BP_m2GO:00347E | positive re  | 3/470  | 151/23843 | 0.574426 | 0.723434 | 0.6773   | Bmp4/Kcnf   |
| GO_BP_m2GO:00466E | male sex di  | 3/470  | 151/23843 | 0.574426 | 0.723434 | 0.6773   | H3f3b/Sfrp  |
| GO_BP_m2GO:00703C | positive re  | 3/470  | 151/23843 | 0.574426 | 0.723434 | 0.6773   | Gdf6/Pdcd   |
| GO_BP_m2GO:00509C | leukocyte r  | 6/470  | 310/23843 | 0.574832 | 0.723434 | 0.6773   | Myo1g/Pd    |
| GO_BP_m2GO:00017C | cell fate de | 1/470  | 43/23843  | 0.575506 | 0.723434 | 0.6773   | Bmp4        |
| GO_BP_m2GO:000182 | blastocyst   | 11/470 | 43/23843  | 0.575506 | 0.723434 | 0.6773   | Lats2       |
| GO_BP_m2GO:00019E | negative re  | 1/470  | 43/23843  | 0.575506 | 0.723434 | 0.6773   | Palm3       |
| GO_BP_m2GO:000762 | adult walki  | 1/470  | 43/23843  | 0.575506 | 0.723434 | 0.6773   | Chd7        |
| GO_BP_m2GO:00102E | NADH deh     | 1/470  | 43/23843  | 0.575506 | 0.723434 | 0.6773   | Ndufaf8     |
| GO_BP_m2GO:00149C | myotube c    | 1/470  | 43/23843  | 0.575506 | 0.723434 | 0.6773   | Klhl41      |
| GO_BP_m2GO:001802 | peptidyl-ly  | 1/470  | 43/23843  | 0.575506 | 0.723434 | 0.6773   | Hist1h1e    |
| GO_BP_m2GO:00301E | proteoglyc   | 1/470  | 43/23843  | 0.575506 | 0.723434 | 0.6773   | Chst12      |
| GO_BP_m2GO:003111 | negative re  | 1/470  | 43/23843  | 0.575506 | 0.723434 | 0.6773   | Dyrk1a      |
| GO_BP_m2GO:00327E | positive re  | 1/470  | 43/23843  | 0.575506 | 0.723434 | 0.6773   | Mavs        |
| GO_BP_m2GO:00329E | mitochond    | 1/470  | 43/23843  | 0.575506 | 0.723434 | 0.6773   | Ndufaf8     |
| GO_BP_m2GO:006164 | histone H3   | 1/470  | 43/23843  | 0.575506 | 0.723434 | 0.6773   | Kdm3a       |
| GO_BP_m2GO:007052 | platelet ag  | 1/470  | 43/23843  | 0.575506 | 0.723434 | 0.6773   | Stxbp1      |
| GO_BP_m2GO:00713E | cellular res | 1/470  | 43/23843  | 0.575506 | 0.723434 | 0.6773   | Bmp4        |
| GO_BP_m2GO:009031 | negative re  | 1/470  | 43/23843  | 0.575506 | 0.723434 | 0.6773   | Ube2j1      |
| GO_BP_m2GO:190311 | regulation   | 1/470  | 43/23843  | 0.575506 | 0.723434 | 0.6773   | Pde4d       |
| GO_BP_m2GO:190551 | macrophag    | 1/470  | 43/23843  | 0.575506 | 0.723434 | 0.6773   | Ptk2b       |
| GO_BP_m2GO:000991 | epidermal    | 4/470  | 205/23843 | 0.577369 | 0.725269 | 0.679019 | Bmp4/Kazr   |
| GO_BP_m2GO:000242 | immune re    | 6/470  | 311/23843 | 0.577976 | 0.725269 | 0.679019 | Csk/Ighv1-  |
| GO_BP_m2GO:000301 | renal syste  | 2/470  | 98/23843  | 0.578349 | 0.725269 | 0.679019 | Bmp4/Sulf   |
| GO_BP_m2GO:00060C | pyruvate r   | 2/470  | 98/23843  | 0.578349 | 0.725269 | 0.679019 | Nr4a3/Pk    |
| GO_BP_m2GO:001624 | regulation   | 2/470  | 98/23843  | 0.578349 | 0.725269 | 0.679019 | Pink1/Ralb  |
| GO_BP_m2GO:00320C | negative re  | 2/470  | 98/23843  | 0.578349 | 0.725269 | 0.679019 | Aurkb/Ralk  |
| GO_BP_m2GO:00526E | cyclic purin | 2/470  | 98/23843  | 0.578349 | 0.725269 | 0.679019 | Gucy2c/Ptk  |
| GO_BP_m2GO:007022 | lymphocyt    | 2/470  | 98/23843  | 0.578349 | 0.725269 | 0.679019 | Aurkb/Bmp   |
| GO_BP_m2GO:00550E | monovalen    | 3/470  | 152/23843 | 0.578907 | 0.725737 | 0.679457 | Atp6v1h/G   |
| GO_BP_m2GO:00030C | regionaliza  | 7/470  | 364/23843 | 0.579067 | 0.725737 | 0.679457 | Bmp4/Ift12  |
| GO_BP_m2GO:001921 | regulation   | 6/470  | 312/23843 | 0.581109 | 0.727428 | 0.68104  | Acsl4/Erfe/ |
| GO_BP_m2GO:00026C | positive re  | 4/470  | 206/23843 | 0.581214 | 0.727428 | 0.68104  | Nr4a3/Rac   |
| GO_BP_m2GO:00091C | cyclic nucle | 2/470  | 99/23843  | 0.583881 | 0.727428 | 0.68104  | Gucy2c/Ptk  |
| GO_BP_m2GO:001481 | muscle cell  | 2/470  | 99/23843  | 0.583881 | 0.727428 | 0.68104  | Foxo4/Plau  |
| GO_BP_m2GO:00420E | regulation   | 2/470  | 99/23843  | 0.583881 | 0.727428 | 0.68104  | Cybb/Ube2   |
| GO_BP_m2GO:19018C | positive re  | 2/470  | 99/23843  | 0.583881 | 0.727428 | 0.68104  | Rack1/Cop   |
| GO_BP_m2GO:00033E | epithelial c | 1/470  | 44/23843  | 0.583888 | 0.727428 | 0.68104  | Frmd6       |
| GO_BP_m2GO:00066C | cholesterol  | 1/470  | 44/23843  | 0.583888 | 0.727428 | 0.68104  | Sc5d        |
| GO_BP_m2GO:00198E | cytolysis    | 1/470  | 44/23843  | 0.583888 | 0.727428 | 0.68104  | Csf2        |
| GO_BP_m2GO:00427E | eating beh.  | 1/470  | 44/23843  | 0.583888 | 0.727428 | 0.68104  | Agrp        |

|                   |              |       |           |          |          |          |             |
|-------------------|--------------|-------|-----------|----------|----------|----------|-------------|
| GO_BP_m2GO:004326 | positive reg | 1/470 | 44/23843  | 0.583888 | 0.727428 | 0.68104  | Kcnh2       |
| GO_BP_m2GO:005135 | positive reg | 1/470 | 44/23843  | 0.583888 | 0.727428 | 0.68104  | Ptk2b       |
| GO_BP_m2GO:006161 | pri-miRNA    | 1/470 | 44/23843  | 0.583888 | 0.727428 | 0.68104  | Bmp4        |
| GO_BP_m2GO:006191 | selective at | 1/470 | 44/23843  | 0.583888 | 0.727428 | 0.68104  | Pink1       |
| GO_BP_m2GO:007023 | regulation   | 1/470 | 44/23843  | 0.583888 | 0.727428 | 0.68104  | Bmp4        |
| GO_BP_m2GO:007167 | regulation   | 1/470 | 44/23843  | 0.583888 | 0.727428 | 0.68104  | S100a14     |
| GO_BP_m2GO:009018 | positive reg | 1/470 | 44/23843  | 0.583888 | 0.727428 | 0.68104  | Bmp4        |
| GO_BP_m2GO:009065 | walking be   | 1/470 | 44/23843  | 0.583888 | 0.727428 | 0.68104  | Chd7        |
| GO_BP_m2GO:190314 | regulation   | 1/470 | 44/23843  | 0.583888 | 0.727428 | 0.68104  | Pink1       |
| GO_BP_m2GO:000626 | DNA replic   | 5/470 | 260/23843 | 0.584156 | 0.727428 | 0.68104  | Bmp4/Chai   |
| GO_BP_m2GO:000701 | microtubul   | 5/470 | 260/23843 | 0.584156 | 0.727428 | 0.68104  | Bloc1s2/Cf  |
| GO_BP_m2GO:190129 | nucleoside   | 6/470 | 313/23843 | 0.584231 | 0.727428 | 0.68104  | Adsl/Ak8/C  |
| GO_BP_m2GO:004340 | negative re  | 3/470 | 154/23843 | 0.587778 | 0.731628 | 0.684972 | Bmp4/Csk/   |
| GO_BP_m2GO:002260 | digestive sy | 2/470 | 100/23843 | 0.58936  | 0.732745 | 0.686018 | Acat2/Aco1  |
| GO_BP_m2GO:003139 | positive reg | 2/470 | 100/23843 | 0.58936  | 0.732745 | 0.686018 | Derl1/Rnf2  |
| GO_BP_m2GO:005198 | regulation   | 2/470 | 100/23843 | 0.58936  | 0.732745 | 0.686018 | Cit/Ect2    |
| GO_BP_m2GO:000199 | regulation   | 1/470 | 45/23843  | 0.592106 | 0.732745 | 0.686018 | Rasl10b     |
| GO_BP_m2GO:000752 | myoblast fu  | 1/470 | 45/23843  | 0.592106 | 0.732745 | 0.686018 | Cd53        |
| GO_BP_m2GO:001046 | regulation   | 1/470 | 45/23843  | 0.592106 | 0.732745 | 0.686018 | Bmp4        |
| GO_BP_m2GO:003164 | protein de   | 1/470 | 45/23843  | 0.592106 | 0.732745 | 0.686018 | Derl1       |
| GO_BP_m2GO:003278 | regulation   | 1/470 | 45/23843  | 0.592106 | 0.732745 | 0.686018 | Ell         |
| GO_BP_m2GO:004208 | T-helper 1   | 1/470 | 45/23843  | 0.592106 | 0.732745 | 0.686018 | Il12rb1     |
| GO_BP_m2GO:004590 | positive reg | 1/470 | 45/23843  | 0.592106 | 0.732745 | 0.686018 | Shc1        |
| GO_BP_m2GO:005087 | brown fat c  | 1/470 | 45/23843  | 0.592106 | 0.732745 | 0.686018 | Cebpa       |
| GO_BP_m2GO:006032 | head morp    | 1/470 | 45/23843  | 0.592106 | 0.732745 | 0.686018 | Sgpl1       |
| GO_BP_m2GO:006076 | positive reg | 1/470 | 45/23843  | 0.592106 | 0.732745 | 0.686018 | Mavs        |
| GO_BP_m2GO:007124 | cellular res | 1/470 | 45/23843  | 0.592106 | 0.732745 | 0.686018 | Atf4        |
| GO_BP_m2GO:007130 | cellular res | 1/470 | 45/23843  | 0.592106 | 0.732745 | 0.686018 | Ptk2b       |
| GO_BP_m2GO:007138 | cellular res | 1/470 | 45/23843  | 0.592106 | 0.732745 | 0.686018 | Bmp4        |
| GO_BP_m2GO:009019 | regulation   | 1/470 | 45/23843  | 0.592106 | 0.732745 | 0.686018 | Pink1       |
| GO_BP_m2GO:009893 | axonal tran  | 1/470 | 45/23843  | 0.592106 | 0.732745 | 0.686018 | Bloc1s2     |
| GO_BP_m2GO:190262 | regulation   | 1/470 | 45/23843  | 0.592106 | 0.732745 | 0.686018 | Rac2        |
| GO_BP_m2GO:001993 | cyclic-nucl  | 3/470 | 155/23843 | 0.592169 | 0.732745 | 0.686018 | Adgrg6/Pe   |
| GO_BP_m2GO:003286 | response tr  | 4/470 | 209/23843 | 0.592629 | 0.732883 | 0.686147 | Cad/Cry1/F  |
| GO_BP_m2GO:003476 | positive reg | 4/470 | 209/23843 | 0.592629 | 0.732883 | 0.686147 | Bmp4/Kcni   |
| GO_BP_m2GO:000926 | ribonucleo   | 5/470 | 263/23843 | 0.594325 | 0.734764 | 0.687908 | Adsl/Cad/C  |
| GO_BP_m2GO:000602 | aminoglyc    | 2/470 | 101/23843 | 0.594785 | 0.734899 | 0.688034 | Chst12/Chs  |
| GO_BP_m2GO:200037 | positive reg | 2/470 | 101/23843 | 0.594785 | 0.734899 | 0.688034 | Plau/Ptk2b  |
| GO_BP_m2GO:190161 | organic hy   | 4/470 | 210/23843 | 0.596393 | 0.736487 | 0.689521 | Pcbd1/Ptk2  |
| GO_BP_m2GO:000660 | protein tar  | 6/470 | 317/23843 | 0.596596 | 0.736487 | 0.689521 | Pex5l/Pink1 |
| GO_BP_m2GO:001076 | regulation   | 6/470 | 317/23843 | 0.596596 | 0.736487 | 0.689521 | Agrn/Cit/R  |
| GO_BP_m2GO:000275 | immune re    | 8/470 | 424/23843 | 0.599204 | 0.737849 | 0.690797 | Csk/Ighv1-  |
| GO_BP_m2GO:000195 | regulation   | 2/470 | 102/23843 | 0.600156 | 0.737849 | 0.690797 | Plau/Ptk2b  |
| GO_BP_m2GO:000282 | positive reg | 2/470 | 102/23843 | 0.600156 | 0.737849 | 0.690797 | Il12rb1/Zbt |
| GO_BP_m2GO:003355 | unsaturate   | 2/470 | 102/23843 | 0.600156 | 0.737849 | 0.690797 | Cyp2g1/Fa   |
| GO_BP_m2GO:190401 | epithelial c | 2/470 | 102/23843 | 0.600156 | 0.737849 | 0.690797 | Bmp4/Six3   |
| GO_BP_m2GO:000232 | natural kill | 1/470 | 46/23843  | 0.600162 | 0.737849 | 0.690797 | Ifna4       |
| GO_BP_m2GO:000317 | heart valve  | 1/470 | 46/23843  | 0.600162 | 0.737849 | 0.690797 | Bmp4        |

|                                     |           |          |          |          |              |
|-------------------------------------|-----------|----------|----------|----------|--------------|
| GO_BP_m2GO:00323Cicosanoid s1/470   | 46/23843  | 0.600162 | 0.737849 | 0.690797 | Acsl4        |
| GO_BP_m2GO:004542positive reç1/470  | 46/23843  | 0.600162 | 0.737849 | 0.690797 | Ptk2b        |
| GO_BP_m2GO:005111cofactor ca1/470   | 46/23843  | 0.600162 | 0.737849 | 0.690797 | Pm20d2       |
| GO_BP_m2GO:005148regulation 1/470   | 46/23843  | 0.600162 | 0.737849 | 0.690797 | Agrn         |
| GO_BP_m2GO:007054response tr1/470   | 46/23843  | 0.600162 | 0.737849 | 0.690797 | Acaca        |
| GO_BP_m2GO:190265secondary 1/470    | 46/23843  | 0.600162 | 0.737849 | 0.690797 | Sc5d         |
| GO_BP_m2GO:19044Cpositive reç1/470  | 46/23843  | 0.600162 | 0.737849 | 0.690797 | Ptk2b        |
| GO_BP_m2GO:000691autophagy 7/470    | 372/23843 | 0.601984 | 0.739656 | 0.692488 | Cym/Lmx1     |
| GO_BP_m2GO:006191process uti 7/470  | 372/23843 | 0.601984 | 0.739656 | 0.692488 | Cym/Lmx1     |
| GO_BP_m2GO:004886stem cell d4/470   | 212/23843 | 0.603859 | 0.741122 | 0.693861 | Bmp4/Foxc    |
| GO_BP_m2GO:005149positive reç4/470  | 212/23843 | 0.603859 | 0.741122 | 0.693861 | Cep120/Ptl   |
| GO_BP_m2GO:004426cellular car 5/470 | 266/23843 | 0.604355 | 0.741122 | 0.693861 | Fgl1/Mtmr    |
| GO_BP_m2GO:004639ribose pho:5/470   | 266/23843 | 0.604355 | 0.741122 | 0.693861 | Adsl/Cad/C   |
| GO_BP_m2GO:000726Ras proteir8/470   | 426/23843 | 0.604499 | 0.741122 | 0.693861 | Arap3/Auts   |
| GO_BP_m2GO:00307Ccytoskeletc3/470   | 158/23843 | 0.605158 | 0.741122 | 0.693861 | Bloc1s2/lft: |
| GO_BP_m2GO:00511Cnegative re3/470   | 158/23843 | 0.605158 | 0.741122 | 0.693861 | Aurkb/Id2/   |
| GO_BP_m2GO:007217epithelial tr3/470 | 158/23843 | 0.605158 | 0.741122 | 0.693861 | Bmp4/lft12   |
| GO_BP_m2GO:003051regulation 2/470   | 103/23843 | 0.605474 | 0.741122 | 0.693861 | Rab11a/Rn    |
| GO_BP_m2GO:003241positive reç2/470  | 103/23843 | 0.605474 | 0.741122 | 0.693861 | Bmp4/Pink    |
| GO_BP_m2GO:004347pigmentati 2/470   | 103/23843 | 0.605474 | 0.741122 | 0.693861 | Rack1/Rab:   |
| GO_BP_m2GO:00435Cmuscle adç2/470    | 103/23843 | 0.605474 | 0.741122 | 0.693861 | Nr4a3/Twf:   |
| GO_BP_m2GO:006075regulation 2/470   | 103/23843 | 0.605474 | 0.741122 | 0.693861 | Mavs/Palm    |
| GO_BP_m2GO:004224tissue rege 1/470  | 47/23843  | 0.608059 | 0.743203 | 0.695809 | Plau         |
| GO_BP_m2GO:004355regulation 1/470   | 47/23843  | 0.608059 | 0.743203 | 0.695809 | Ptk2b        |
| GO_BP_m2GO:006076negative re1/470   | 47/23843  | 0.608059 | 0.743203 | 0.695809 | Palm3        |
| GO_BP_m2GO:007026necrotic ce 1/470  | 47/23843  | 0.608059 | 0.743203 | 0.695809 | Hebp2        |
| GO_BP_m2GO:009858cellular resj1/470 | 47/23843  | 0.608059 | 0.743203 | 0.695809 | Mavs         |
| GO_BP_m2GO:007066leukocyte r6/470   | 321/23843 | 0.608765 | 0.743849 | 0.696413 | Bmp4/lfna:   |
| GO_BP_m2GO:190165response tr3/470   | 159/23843 | 0.609427 | 0.744441 | 0.696968 | Acaca/Bmpç   |
| GO_BP_m2GO:004316proteasom 7/470    | 375/23843 | 0.610409 | 0.744958 | 0.697452 | Derl1/Rack   |
| GO_BP_m2GO:000913nucleoside 2/470   | 104/23843 | 0.610737 | 0.744958 | 0.697452 | Ak8/Pkfb2    |
| GO_BP_m2GO:00300Ccellular mo 2/470  | 104/23843 | 0.610737 | 0.744958 | 0.697452 | Atp6v1h/G    |
| GO_BP_m2GO:00487Cembryonic 2/470    | 104/23843 | 0.610737 | 0.744958 | 0.697452 | Bmp4/Col2    |
| GO_BP_m2GO:19034Creactive ox:2/470  | 104/23843 | 0.610737 | 0.744958 | 0.697452 | Cybb/Ptk2l   |
| GO_BP_m2GO:000741axon guida4/470    | 214/23843 | 0.611241 | 0.745355 | 0.697824 | Agrn/Nr4a:   |
| GO_BP_m2GO:007058calcium ior5/470   | 269/23843 | 0.614243 | 0.74697  | 0.699336 | Bmp4/Chd     |
| GO_BP_m2GO:000276immune re 6/470    | 323/23843 | 0.614773 | 0.74697  | 0.699336 | Csk/lghv1-   |
| GO_BP_m2GO:000854epidermis r6/470   | 323/23843 | 0.614773 | 0.74697  | 0.699336 | Bmp4/Dkk:    |
| GO_BP_m2GO:000276negative re1/470   | 48/23843  | 0.6158   | 0.74697  | 0.699336 | Mafb         |
| GO_BP_m2GO:00105C RNA secon1/470    | 48/23843  | 0.6158   | 0.74697  | 0.699336 | Ddx3y        |
| GO_BP_m2GO:001076fibroblast r1/470  | 48/23843  | 0.6158   | 0.74697  | 0.699336 | Sgpl1        |
| GO_BP_m2GO:001909reproductiv1/470   | 48/23843  | 0.6158   | 0.74697  | 0.699336 | Aplp2        |
| GO_BP_m2GO:003164regulation 1/470   | 48/23843  | 0.6158   | 0.74697  | 0.699336 | Mtmr2        |
| GO_BP_m2GO:004395cellular cor 1/470 | 48/23843  | 0.6158   | 0.74697  | 0.699336 | Mtmr2        |
| GO_BP_m2GO:004512regulation 1/470   | 48/23843  | 0.6158   | 0.74697  | 0.699336 | Csk          |
| GO_BP_m2GO:00610Ccell differer1/470 | 48/23843  | 0.6158   | 0.74697  | 0.699336 | Bmp4         |
| GO_BP_m2GO:009951vesicle cytc1/470  | 48/23843  | 0.6158   | 0.74697  | 0.699336 | Bloc1s2      |
| GO_BP_m2GO:190157fatty acid d1/470  | 48/23843  | 0.6158   | 0.74697  | 0.699336 | Hmgcl        |

|                                      |           |          |          |          |            |
|--------------------------------------|-----------|----------|----------|----------|------------|
| GO_BP_m2GO:20003Eregulation 1/470    | 48/23843  | 0.6158   | 0.74697  | 0.699336 | Bmp4       |
| GO_BP_m2GO:20004Cregulation 1/470    | 48/23843  | 0.6158   | 0.74697  | 0.699336 | Ptk2b      |
| GO_BP_m2GO:000072double-str2/470     | 105/23843 | 0.615948 | 0.74697  | 0.699336 | H2afx/Recc |
| GO_BP_m2GO:000072recombina2/470      | 105/23843 | 0.615948 | 0.74697  | 0.699336 | H2afx/Recc |
| GO_BP_m2GO:00219Ecerebral co2/470    | 105/23843 | 0.615948 | 0.74697  | 0.699336 | Cep120/Zbt |
| GO_BP_m2GO:003031osteoclast 2/470    | 105/23843 | 0.615948 | 0.74697  | 0.699336 | Farp2/Maft |
| GO_BP_m2GO:00310Estress-activ5/470   | 270/23843 | 0.617507 | 0.748645 | 0.700904 | Gdf6/Nbr1  |
| GO_BP_m2GO:00162Cregulation 3/470    | 161/23843 | 0.617871 | 0.748869 | 0.701114 | Bmp4/Klh4  |
| GO_BP_m2GO:00974Eneuron prc4/470     | 216/23843 | 0.618537 | 0.749066 | 0.701298 | Agrn/Nr4a  |
| GO_BP_m2GO:004647glycerophc2/470     | 106/23843 | 0.621104 | 0.749066 | 0.701298 | Cdipt/Pigr |
| GO_BP_m2GO:19902Eneutrophil 2/470    | 106/23843 | 0.621104 | 0.749066 | 0.701298 | Pde4d/Rac  |
| GO_BP_m2GO:007252purine-cor9/470     | 486/23843 | 0.621877 | 0.749066 | 0.701298 | Adsl/Rack1 |
| GO_BP_m2GO:003087mammary 3/470       | 162/23843 | 0.622046 | 0.749066 | 0.701298 | Bmp4/Id2/  |
| GO_BP_m2GO:00019Epositive re1/470    | 49/23843  | 0.623389 | 0.749066 | 0.701298 | Ptk2b      |
| GO_BP_m2GO:000204cell migrati1/470   | 49/23843  | 0.623389 | 0.749066 | 0.701298 | Pdcd10     |
| GO_BP_m2GO:00103Eresponse tr1/470    | 49/23843  | 0.623389 | 0.749066 | 0.701298 | H2afx      |
| GO_BP_m2GO:00106Eregulation 1/470    | 49/23843  | 0.623389 | 0.749066 | 0.701298 | Sfrp2      |
| GO_BP_m2GO:001587dopamine 1/470      | 49/23843  | 0.623389 | 0.749066 | 0.701298 | Pink1      |
| GO_BP_m2GO:001657histone ph1/470     | 49/23843  | 0.623389 | 0.749066 | 0.701298 | Aurkb      |
| GO_BP_m2GO:001714stem cell d 1/470   | 49/23843  | 0.623389 | 0.749066 | 0.701298 | Sfrp2      |
| GO_BP_m2GO:00301Enegative re1/470    | 49/23843  | 0.623389 | 0.749066 | 0.701298 | Plau       |
| GO_BP_m2GO:00308Eregulation 1/470    | 49/23843  | 0.623389 | 0.749066 | 0.701298 | Twf1       |
| GO_BP_m2GO:003101endocrine 1/470     | 49/23843  | 0.623389 | 0.749066 | 0.701298 | Bmp4       |
| GO_BP_m2GO:003111regulation 1/470    | 49/23843  | 0.623389 | 0.749066 | 0.701298 | Dyrk1a     |
| GO_BP_m2GO:00324Epositive re1/470    | 49/23843  | 0.623389 | 0.749066 | 0.701298 | Mavs       |
| GO_BP_m2GO:003264regulation 1/470    | 49/23843  | 0.623389 | 0.749066 | 0.701298 | Mavs       |
| GO_BP_m2GO:00329Ecollagen bi1/470    | 49/23843  | 0.623389 | 0.749066 | 0.701298 | Bmp4       |
| GO_BP_m2GO:00432Eapical junc1/470    | 49/23843  | 0.623389 | 0.749066 | 0.701298 | Ect2       |
| GO_BP_m2GO:00440Eregulation 1/470    | 49/23843  | 0.623389 | 0.749066 | 0.701298 | Acat2      |
| GO_BP_m2GO:004501actin nucle 1/470   | 49/23843  | 0.623389 | 0.749066 | 0.701298 | Spire2     |
| GO_BP_m2GO:00456Epositive re1/470    | 49/23843  | 0.623389 | 0.749066 | 0.701298 | Id2        |
| GO_BP_m2GO:005077positive re1/470    | 49/23843  | 0.623389 | 0.749066 | 0.701298 | Ss18l1     |
| GO_BP_m2GO:005114negative re1/470    | 49/23843  | 0.623389 | 0.749066 | 0.701298 | Foxo4      |
| GO_BP_m2GO:005502positive re1/470    | 49/23843  | 0.623389 | 0.749066 | 0.701298 | Bmp4       |
| GO_BP_m2GO:006042lung epith1/470     | 49/23843  | 0.623389 | 0.749066 | 0.701298 | Bmp4       |
| GO_BP_m2GO:007097protein loc 1/470   | 49/23843  | 0.623389 | 0.749066 | 0.701298 | Sec63      |
| GO_BP_m2GO:190004negative re1/470    | 49/23843  | 0.623389 | 0.749066 | 0.701298 | Plau       |
| GO_BP_m2GO:19052Enegative re1/470    | 49/23843  | 0.623389 | 0.749066 | 0.701298 | Kdm3a      |
| GO_BP_m2GO:003297regulation 7/470    | 380/23843 | 0.624239 | 0.749873 | 0.702053 | Cit/Frmd6/ |
| GO_BP_m2GO:00328Eregulation 4/470    | 218/23843 | 0.625748 | 0.750733 | 0.702859 | Agrn/Cep1  |
| GO_BP_m2GO:00082Einsulin rece2/470   | 107/23843 | 0.626207 | 0.750733 | 0.702859 | Foxo4/Shc  |
| GO_BP_m2GO:000834adult locon2/470    | 107/23843 | 0.626207 | 0.750733 | 0.702859 | Chd7/Id2   |
| GO_BP_m2GO:004662regulation 2/470    | 107/23843 | 0.626207 | 0.750733 | 0.702859 | Lats2/Serp |
| GO_BP_m2GO:004881regulation 2/470    | 107/23843 | 0.626207 | 0.750733 | 0.702859 | Cit/Ss18l1 |
| GO_BP_m2GO:00515Eregulation 2/470    | 107/23843 | 0.626207 | 0.750733 | 0.702859 | Cplx4/Stxb |
| GO_BP_m2GO:190382negative re2/470    | 107/23843 | 0.626207 | 0.750733 | 0.702859 | Csk/Ube2j1 |
| GO_BP_m2GO:005071positive re5/470    | 273/23843 | 0.6272   | 0.751709 | 0.703773 | Glul/Mavs/ |
| GO_BP_m2GO:00100Cglial cell dit4/470 | 219/23843 | 0.62932  | 0.753689 | 0.705626 | Adgrg6/Bn  |



|                               |       |           |          |          |          |             |
|-------------------------------|-------|-----------|----------|----------|----------|-------------|
| GO_BP_m2GO:190186regulation   | 3/470 | 164/23843 | 0.630304 | 0.753689 | 0.705626 | Bmp4/Klhl   |
| GO_BP_m2GO:000914nucleoside   | 5/470 | 274/23843 | 0.630399 | 0.753689 | 0.705626 | Ak8/Cad/P   |
| GO_BP_m2GO:000028nuclear-tra  | 1/470 | 50/23843  | 0.630828 | 0.753689 | 0.705626 | Exosc2      |
| GO_BP_m2GO:001051regulation   | 1/470 | 50/23843  | 0.630828 | 0.753689 | 0.705626 | Sele        |
| GO_BP_m2GO:003221regulation   | 1/470 | 50/23843  | 0.630828 | 0.753689 | 0.705626 | Aurkb       |
| GO_BP_m2GO:003362cell adhesio | 1/470 | 50/23843  | 0.630828 | 0.753689 | 0.705626 | Plau        |
| GO_BP_m2GO:003530positive re  | 1/470 | 50/23843  | 0.630828 | 0.753689 | 0.705626 | Pink1       |
| GO_BP_m2GO:004298amyloid pri  | 1/470 | 50/23843  | 0.630828 | 0.753689 | 0.705626 | Dyrk1a      |
| GO_BP_m2GO:004394regulation   | 1/470 | 50/23843  | 0.630828 | 0.753689 | 0.705626 | Pex5l       |
| GO_BP_m2GO:004870embryonic    | 1/470 | 50/23843  | 0.630828 | 0.753689 | 0.705626 | Bmp4        |
| GO_BP_m2GO:000282positive re  | 2/470 | 108/23843 | 0.631257 | 0.753771 | 0.705703 | Il12rb1/Zbt |
| GO_BP_m2GO:000634chromatin    | 2/470 | 108/23843 | 0.631257 | 0.753771 | 0.705703 | H2afx/Rrp8  |
| GO_BP_m2GO:000150skeletal sys | 9/470 | 490/23843 | 0.631559 | 0.753918 | 0.70584  | Bmp4/Chd    |
| GO_BP_m2GO:004863regulation   | 3/470 | 165/23843 | 0.634386 | 0.757077 | 0.708798 | Bmp4/Klhl   |
| GO_BP_m2GO:000276immune re    | 8/470 | 438/23843 | 0.635501 | 0.757655 | 0.70934  | Csk/Ighv1-  |
| GO_BP_m2GO:000018activation c | 2/470 | 109/23843 | 0.636253 | 0.757655 | 0.70934  | Muc20/Shc   |
| GO_BP_m2GO:000173establishm   | 1/470 | 51/23843  | 0.638121 | 0.757655 | 0.70934  | Sfrp2       |
| GO_BP_m2GO:000189retina hom   | 1/470 | 51/23843  | 0.638121 | 0.757655 | 0.70934  | Crocc       |
| GO_BP_m2GO:000197blood vess   | 1/470 | 51/23843  | 0.638121 | 0.757655 | 0.70934  | Chd7        |
| GO_BP_m2GO:000752neuromusc    | 1/470 | 51/23843  | 0.638121 | 0.757655 | 0.70934  | Agrn        |
| GO_BP_m2GO:001066regulation   | 1/470 | 51/23843  | 0.638121 | 0.757655 | 0.70934  | Sfrp2       |
| GO_BP_m2GO:001082negative re  | 1/470 | 51/23843  | 0.638121 | 0.757655 | 0.70934  | Pink1       |
| GO_BP_m2GO:003260interferon-  | 1/470 | 51/23843  | 0.638121 | 0.757655 | 0.70934  | Mavs        |
| GO_BP_m2GO:003272negative re  | 1/470 | 51/23843  | 0.638121 | 0.757655 | 0.70934  | Syt11       |
| GO_BP_m2GO:003508establishm   | 1/470 | 51/23843  | 0.638121 | 0.757655 | 0.70934  | Ooep        |
| GO_BP_m2GO:004560regulation   | 1/470 | 51/23843  | 0.638121 | 0.757655 | 0.70934  | Bmp4        |
| GO_BP_m2GO:004577positive re  | 1/470 | 51/23843  | 0.638121 | 0.757655 | 0.70934  | Rab11a      |
| GO_BP_m2GO:004824lymphocyt    | 1/470 | 51/23843  | 0.638121 | 0.757655 | 0.70934  | Ptk2b       |
| GO_BP_m2GO:005081negative re  | 1/470 | 51/23843  | 0.638121 | 0.757655 | 0.70934  | Plau        |
| GO_BP_m2GO:006124establishm   | 1/470 | 51/23843  | 0.638121 | 0.757655 | 0.70934  | Ooep        |
| GO_BP_m2GO:007171icosanoid t  | 1/470 | 51/23843  | 0.638121 | 0.757655 | 0.70934  | Acsl4       |
| GO_BP_m2GO:190157fatty acid d | 1/470 | 51/23843  | 0.638121 | 0.757655 | 0.70934  | Acsl4       |
| GO_BP_m2GO:000664phospholip   | 6/470 | 332/23843 | 0.641159 | 0.760661 | 0.712154 | Cdipt/Fam   |
| GO_BP_m2GO:005126protein de   | 2/470 | 110/23843 | 0.641196 | 0.760661 | 0.712154 | Sh3gl1/Twi  |
| GO_BP_m2GO:200004regulation   | 2/470 | 110/23843 | 0.641196 | 0.760661 | 0.712154 | Id2/Zc3h12  |
| GO_BP_m2GO:000610regulation   | 3/470 | 167/23843 | 0.642455 | 0.760975 | 0.712448 | Fgl1/Pfkfb2 |
| GO_BP_m2GO:000998anterior/pc  | 4/470 | 223/23843 | 0.643392 | 0.760975 | 0.712448 | Bmp4/Lfng   |
| GO_BP_m2GO:000726small GTPa   | 9/470 | 495/23843 | 0.643472 | 0.760975 | 0.712448 | Arap3/Aut   |
| GO_BP_m2GO:000716establishm   | 1/470 | 52/23843  | 0.645269 | 0.760975 | 0.712448 | Sfrp2       |
| GO_BP_m2GO:000761mating       | 1/470 | 52/23843  | 0.645269 | 0.760975 | 0.712448 | Aplp2       |
| GO_BP_m2GO:001612sterol bios  | 1/470 | 52/23843  | 0.645269 | 0.760975 | 0.712448 | Sc5d        |
| GO_BP_m2GO:003080positive re  | 1/470 | 52/23843  | 0.645269 | 0.760975 | 0.712448 | Rack1       |
| GO_BP_m2GO:003088prostate gl  | 1/470 | 52/23843  | 0.645269 | 0.760975 | 0.712448 | Bmp4        |
| GO_BP_m2GO:004339negative re  | 1/470 | 52/23843  | 0.645269 | 0.760975 | 0.712448 | Id2         |
| GO_BP_m2GO:004353positive re  | 1/470 | 52/23843  | 0.645269 | 0.760975 | 0.712448 | Angpt4      |
| GO_BP_m2GO:004559negative re  | 1/470 | 52/23843  | 0.645269 | 0.760975 | 0.712448 | Tgfb1i1     |
| GO_BP_m2GO:004577positive re  | 1/470 | 52/23843  | 0.645269 | 0.760975 | 0.712448 | Id2         |
| GO_BP_m2GO:004583negative re  | 1/470 | 52/23843  | 0.645269 | 0.760975 | 0.712448 | Bmp4        |

|                                      |           |          |          |          |             |
|--------------------------------------|-----------|----------|----------|----------|-------------|
| GO_BP_m2GO:004667negative re1/470    | 52/23843  | 0.645269 | 0.760975 | 0.712448 | Ucp2        |
| GO_BP_m2GO:00488Cgenitalia d1/470    | 52/23843  | 0.645269 | 0.760975 | 0.712448 | Chd7        |
| GO_BP_m2GO:007009chemokine 1/470     | 52/23843  | 0.645269 | 0.760975 | 0.712448 | Ptk2b       |
| GO_BP_m2GO:007252pyrimidine 1/470    | 52/23843  | 0.645269 | 0.760975 | 0.712448 | Cad         |
| GO_BP_m2GO:007257endothelial1/470    | 52/23843  | 0.645269 | 0.760975 | 0.712448 | Bmp4        |
| GO_BP_m2GO:007267T cell migr1/470    | 52/23843  | 0.645269 | 0.760975 | 0.712448 | Myo1g       |
| GO_BP_m2GO:19035Enegative re1/470    | 52/23843  | 0.645269 | 0.760975 | 0.712448 | Syt11       |
| GO_BP_m2GO:19052Cregulation 1/470    | 52/23843  | 0.645269 | 0.760975 | 0.712448 | Bmp4        |
| GO_BP_m2GO:004274defense re8/470     | 442/23843 | 0.645531 | 0.761107 | 0.712536 | Defb37/Igf  |
| GO_BP_m2GO:000194hair follicle 2/470 | 111/23843 | 0.646086 | 0.761297 | 0.712749 | Dkk4/Nsun   |
| GO_BP_m2GO:190121positive re2/470    | 111/23843 | 0.646086 | 0.761297 | 0.712749 | Agrn/Atf4   |
| GO_BP_m2GO:000669icosanoid r2/470    | 112/23843 | 0.650923 | 0.763916 | 0.715201 | Cyp2g1/Fa   |
| GO_BP_m2GO:003433adherens j1/470     | 112/23843 | 0.650923 | 0.763916 | 0.715201 | Csk/Ptk2b   |
| GO_BP_m2GO:00420Ecytokine bi2/470    | 112/23843 | 0.650923 | 0.763916 | 0.715201 | Cybb/Ube2   |
| GO_BP_m2GO:004581negative re2/470    | 112/23843 | 0.650923 | 0.763916 | 0.715201 | H2afx/Rrp8  |
| GO_BP_m2GO:00017Eneural cres 1/470   | 53/23843  | 0.652277 | 0.763916 | 0.715201 | Bmp4        |
| GO_BP_m2GO:000254monocyte 1/470      | 53/23843  | 0.652277 | 0.763916 | 0.715201 | S100a14     |
| GO_BP_m2GO:000304regulation 1/470    | 53/23843  | 0.652277 | 0.763916 | 0.715201 | Rasl10b     |
| GO_BP_m2GO:000994anterior/pc1/470    | 53/23843  | 0.652277 | 0.763916 | 0.715201 | Bmp4        |
| GO_BP_m2GO:00106Ecardiac mu1/470     | 53/23843  | 0.652277 | 0.763916 | 0.715201 | Sfrp2       |
| GO_BP_m2GO:00159Clong-chain 1/470    | 53/23843  | 0.652277 | 0.763916 | 0.715201 | Slc27a2     |
| GO_BP_m2GO:003004actin filame1/470   | 53/23843  | 0.652277 | 0.763916 | 0.715201 | Twf1        |
| GO_BP_m2GO:00350Eregulation 1/470    | 53/23843  | 0.652277 | 0.763916 | 0.715201 | Auts2       |
| GO_BP_m2GO:004253positive re1/470    | 53/23843  | 0.652277 | 0.763916 | 0.715201 | Csf2        |
| GO_BP_m2GO:004273exogenous 1/470     | 53/23843  | 0.652277 | 0.763916 | 0.715201 | Cyp2g1      |
| GO_BP_m2GO:00465Enegative re1/470    | 53/23843  | 0.652277 | 0.763916 | 0.715201 | Arap3       |
| GO_BP_m2GO:004662positive re1/470    | 53/23843  | 0.652277 | 0.763916 | 0.715201 | Serp1       |
| GO_BP_m2GO:005193synaptic tr1/470    | 53/23843  | 0.652277 | 0.763916 | 0.715201 | Stxbp1      |
| GO_BP_m2GO:005501ventricular 1/470   | 53/23843  | 0.652277 | 0.763916 | 0.715201 | Chd7        |
| GO_BP_m2GO:190101regulation 1/470    | 53/23843  | 0.652277 | 0.763916 | 0.715201 | Agrn        |
| GO_BP_m2GO:19027Enegative re1/470    | 53/23843  | 0.652277 | 0.763916 | 0.715201 | Foxo4       |
| GO_BP_m2GO:200064positive re1/470    | 53/23843  | 0.652277 | 0.763916 | 0.715201 | Bmp4        |
| GO_BP_m2GO:000941response tr5/470    | 281/23843 | 0.652315 | 0.763916 | 0.715201 | Aurkb/Cry1  |
| GO_BP_m2GO:19029Cregulation 6/470    | 336/23843 | 0.652534 | 0.763916 | 0.715242 | Cit/Dyrk1a, |
| GO_BP_m2GO:000664membrane 3/470      | 170/23843 | 0.654323 | 0.765413 | 0.716603 | Gba2/Pigr   |
| GO_BP_m2GO:00069Ecompleme1/3/470     | 170/23843 | 0.654323 | 0.765413 | 0.716603 | Ighv1-23/I  |
| GO_BP_m2GO:00224Cnegative re3/470    | 170/23843 | 0.654323 | 0.765413 | 0.716603 | Bmp4/Prka   |
| GO_BP_m2GO:000863apoptotic r2/470    | 113/23843 | 0.655708 | 0.766179 | 0.71732  | Bloc1s2/Pir |
| GO_BP_m2GO:00109Cregulation 2/470    | 113/23843 | 0.655708 | 0.766179 | 0.71732  | Fgl1/Pfkfb2 |
| GO_BP_m2GO:003572sodium ion2/470     | 113/23843 | 0.655708 | 0.766179 | 0.71732  | Agrn/Gpd1   |
| GO_BP_m2GO:009877skin epider 2/470   | 113/23843 | 0.655708 | 0.766179 | 0.71732  | Dkk4/Nsun   |
| GO_BP_m2GO:007137cellular res1/4/470 | 227/23843 | 0.657109 | 0.767603 | 0.718653 | Csk/Foxo4,  |
| GO_BP_m2GO:004561regulation 3/470    | 171/23843 | 0.658215 | 0.768486 | 0.719479 | Bmp4/Id2/   |
| GO_BP_m2GO:00075Erespiratory 1/470   | 54/23843  | 0.659147 | 0.768486 | 0.719479 | Mafb        |
| GO_BP_m2GO:001052positive re1/470    | 54/23843  | 0.659147 | 0.768486 | 0.719479 | Bmp4        |
| GO_BP_m2GO:001082positive re1/470    | 54/23843  | 0.659147 | 0.768486 | 0.719479 | Nr4a3       |
| GO_BP_m2GO:003501somatic ste1/470    | 54/23843  | 0.659147 | 0.768486 | 0.719479 | Vps72       |
| GO_BP_m2GO:00482Epositive re1/470    | 54/23843  | 0.659147 | 0.768486 | 0.719479 | Sele        |

|                                    |           |          |          |          |             |
|------------------------------------|-----------|----------|----------|----------|-------------|
| GO_BP_m2GO:006015positive re1/470  | 54/23843  | 0.659147 | 0.768486 | 0.719479 | Sele        |
| GO_BP_m2GO:004217negative re2/470  | 114/23843 | 0.66044  | 0.769352 | 0.72029  | Alad/Ube2,  |
| GO_BP_m2GO:005115regulation 2/470  | 114/23843 | 0.66044  | 0.769352 | 0.72029  | Bmp4/Cd5    |
| GO_BP_m2GO:009917postsynaps2/470   | 114/23843 | 0.66044  | 0.769352 | 0.72029  | Agrn/Mtmi   |
| GO_BP_m2GO:003514tube forma3/470   | 172/23843 | 0.662076 | 0.771044 | 0.721875 | Bmp4/Ift12  |
| GO_BP_m2GO:000688ER to Golgi2/470  | 115/23843 | 0.66512  | 0.773329 | 0.724014 | Tmed4/Tra   |
| GO_BP_m2GO:000705mitotic spir2/470 | 115/23843 | 0.66512  | 0.773329 | 0.724014 | Aurkb/Rab   |
| GO_BP_m2GO:003629cellular res2/470 | 115/23843 | 0.66512  | 0.773329 | 0.724014 | Cybb/Pink1  |
| GO_BP_m2GO:000628nucleotide 1/470  | 55/23843  | 0.665881 | 0.773329 | 0.724014 | Gtf2h1      |
| GO_BP_m2GO:000709metaphase 1/470   | 55/23843  | 0.665881 | 0.773329 | 0.724014 | Cit         |
| GO_BP_m2GO:001065striated mu 1/470 | 55/23843  | 0.665881 | 0.773329 | 0.724014 | Sfrp2       |
| GO_BP_m2GO:004574negative re1/470  | 55/23843  | 0.665881 | 0.773329 | 0.724014 | Cry1        |
| GO_BP_m2GO:004642negative re1/470  | 55/23843  | 0.665881 | 0.773329 | 0.724014 | Suz12       |
| GO_BP_m2GO:004657positive re1/470  | 55/23843  | 0.665881 | 0.773329 | 0.724014 | Auts2       |
| GO_BP_m2GO:190489negative re1/470  | 55/23843  | 0.665881 | 0.773329 | 0.724014 | Suz12       |
| GO_BP_m2GO:200123regulation 7/470  | 396/23843 | 0.666605 | 0.773955 | 0.7246   | Bmp4/Col2   |
| GO_BP_m2GO:006029long-term 4/470   | 230/23843 | 0.667161 | 0.774387 | 0.725004 | Mir129-2/1  |
| GO_BP_m2GO:005134negative re7/470  | 397/23843 | 0.669154 | 0.7761   | 0.726609 | Agrn/Amb1   |
| GO_BP_m2GO:000712meiosis I 2/470   | 116/23843 | 0.669747 | 0.7761   | 0.726609 | Eif4g3/Espl |
| GO_BP_m2GO:001490myotube d2/470    | 116/23843 | 0.669747 | 0.7761   | 0.726609 | Cd53/Klhl4  |
| GO_BP_m2GO:001569ammonium 2/470    | 116/23843 | 0.669747 | 0.7761   | 0.726609 | Csf2/Pink1  |
| GO_BP_m2GO:004210cytokine m2/470   | 116/23843 | 0.669747 | 0.7761   | 0.726609 | Cybb/Ube2   |
| GO_BP_m2GO:005170interaction 2/470 | 116/23843 | 0.669747 | 0.7761   | 0.726609 | Chmp3/Tsc   |
| GO_BP_m2GO:000175eye photor 1/470  | 56/23843  | 0.672483 | 0.777766 | 0.728168 | Rom1        |
| GO_BP_m2GO:000206glandular e1/470  | 56/23843  | 0.672483 | 0.777766 | 0.728168 | Bmp4        |
| GO_BP_m2GO:001096regulation 1/470  | 56/23843  | 0.672483 | 0.777766 | 0.728168 | Cit         |
| GO_BP_m2GO:003556non-canon1/470    | 56/23843  | 0.672483 | 0.777766 | 0.728168 | Sfrp2       |
| GO_BP_m2GO:004478metaphase 1/470   | 56/23843  | 0.672483 | 0.777766 | 0.728168 | Cit         |
| GO_BP_m2GO:004512cellular ext1/470 | 56/23843  | 0.672483 | 0.777766 | 0.728168 | Sele        |
| GO_BP_m2GO:009039cellular sen1/470 | 56/23843  | 0.672483 | 0.777766 | 0.728168 | Id2         |
| GO_BP_m2GO:000681calcium ior 7/470 | 399/23843 | 0.674215 | 0.779555 | 0.729843 | Bmp4/Chd    |
| GO_BP_m2GO:000738pattern spe8/470  | 454/23843 | 0.674658 | 0.779853 | 0.730122 | Bmp4/Ift12  |
| GO_BP_m2GO:000666sphingolipi 2/470 | 118/23843 | 0.678848 | 0.783308 | 0.733356 | Gba2/Sgpl   |
| GO_BP_m2GO:006198meiosis I c2/470  | 118/23843 | 0.678848 | 0.783308 | 0.733356 | Eif4g3/Espl |
| GO_BP_m2GO:001046mesenchyr 1/470   | 57/23843  | 0.678954 | 0.783308 | 0.733356 | Bmp4        |
| GO_BP_m2GO:004346regulation 1/470  | 57/23843  | 0.678954 | 0.783308 | 0.733356 | Agrn        |
| GO_BP_m2GO:004800platelet-de1/470  | 57/23843  | 0.678954 | 0.783308 | 0.733356 | Sgpl1       |
| GO_BP_m2GO:190342positive re1/470  | 57/23843  | 0.678954 | 0.783308 | 0.733356 | Ptk2b       |
| GO_BP_m2GO:200013negative re1/470  | 57/23843  | 0.678954 | 0.783308 | 0.733356 | Zc3h12d     |
| GO_BP_m2GO:001050regulation 4/470  | 234/23843 | 0.680248 | 0.784586 | 0.734552 | Lmx1b/Pinl  |
| GO_BP_m2GO:000008G1/S transi3/470  | 177/23843 | 0.680907 | 0.784913 | 0.734859 | Id2/Lats2/Z |
| GO_BP_m2GO:199013neuron prc3/470   | 177/23843 | 0.680907 | 0.784913 | 0.734859 | Auts2/Rab   |
| GO_BP_m2GO:004440symbiont p6/470   | 347/23843 | 0.682658 | 0.786532 | 0.736375 | Chmp3/Ma    |
| GO_BP_m2GO:003243regulation 2/470  | 119/23843 | 0.68332  | 0.786532 | 0.736375 | Rack1/Cop   |
| GO_BP_m2GO:000244leukocyte r8/470  | 458/23843 | 0.684037 | 0.786532 | 0.736375 | Ighv1-23/I  |
| GO_BP_m2GO:000201morphoge1/470     | 58/23843  | 0.685298 | 0.786532 | 0.736375 | Pdcd10      |
| GO_BP_m2GO:000715heterophili 1/470 | 58/23843  | 0.685298 | 0.786532 | 0.736375 | Sele        |
| GO_BP_m2GO:003083negative re1/470  | 58/23843  | 0.685298 | 0.786532 | 0.736375 | Twf1        |

|                                         |       |           |          |          |          |             |
|-----------------------------------------|-------|-----------|----------|----------|----------|-------------|
| GO_BP_m2GO:004277mitochondrion          | 1/470 | 58/23843  | 0.685298 | 0.786532 | 0.736375 | Pink1       |
| GO_BP_m2GO:004685regulation             | 1/470 | 58/23843  | 0.685298 | 0.786532 | 0.736375 | Csk         |
| GO_BP_m2GO:004828lung alveolus          | 1/470 | 58/23843  | 0.685298 | 0.786532 | 0.736375 | Bmp4        |
| GO_BP_m2GO:005043regulation             | 1/470 | 58/23843  | 0.685298 | 0.786532 | 0.736375 | Pink1       |
| GO_BP_m2GO:005071negative regulation    | 1/470 | 58/23843  | 0.685298 | 0.786532 | 0.736375 | Syt11       |
| GO_BP_m2GO:006003cardiac muscle         | 1/470 | 58/23843  | 0.685298 | 0.786532 | 0.736375 | Prkar1a     |
| GO_BP_m2GO:006044mammary gland          | 1/470 | 58/23843  | 0.685298 | 0.786532 | 0.736375 | Bmp4        |
| GO_BP_m2GO:009018regulation             | 1/470 | 58/23843  | 0.685298 | 0.786532 | 0.736375 | Bmp4        |
| GO_BP_m2GO:190333positive regulation    | 1/470 | 58/23843  | 0.685298 | 0.786532 | 0.736375 | Stxbp1      |
| GO_BP_m2GO:000113response to            | 6/470 | 348/23843 | 0.68531  | 0.786532 | 0.736375 | Acaca/Mir5  |
| GO_BP_m2GO:000181positive regulation    | 7/470 | 404/23843 | 0.686655 | 0.787861 | 0.737619 | Atf4/Csf2/C |
| GO_BP_m2GO:001092regulation             | 2/470 | 120/23843 | 0.687742 | 0.788676 | 0.738382 | Elfn2/Ell   |
| GO_BP_m2GO:190353regulation             | 2/470 | 120/23843 | 0.687742 | 0.788676 | 0.738382 | Pink1/Rac2  |
| GO_BP_m2GO:003133regulation             | 1/470 | 59/23843  | 0.691516 | 0.790843 | 0.740411 | Stxbp1      |
| GO_BP_m2GO:003267regulation             | 1/470 | 59/23843  | 0.691516 | 0.790843 | 0.740411 | Mavs        |
| GO_BP_m2GO:003272positive regulation    | 1/470 | 59/23843  | 0.691516 | 0.790843 | 0.740411 | Mavs        |
| GO_BP_m2GO:004612purine ribonucleoside  | 1/470 | 59/23843  | 0.691516 | 0.790843 | 0.740411 | Ran         |
| GO_BP_m2GO:004684filopodium             | 1/470 | 59/23843  | 0.691516 | 0.790843 | 0.740411 | Agrn        |
| GO_BP_m2GO:005105negative regulation    | 1/470 | 59/23843  | 0.691516 | 0.790843 | 0.740411 | Arap3       |
| GO_BP_m2GO:005133mitotic spindle        | 1/470 | 59/23843  | 0.691516 | 0.790843 | 0.740411 | Cit         |
| GO_BP_m2GO:006071labyrinthine structure | 1/470 | 59/23843  | 0.691516 | 0.790843 | 0.740411 | Erf         |
| GO_BP_m2GO:007023T cell apoptosis       | 1/470 | 59/23843  | 0.691516 | 0.790843 | 0.740411 | Bmp4        |
| GO_BP_m2GO:009700regulation             | 1/470 | 59/23843  | 0.691516 | 0.790843 | 0.740411 | Csk         |
| GO_BP_m2GO:005085B cell receptor        | 3/470 | 180/23843 | 0.691826 | 0.790981 | 0.74054  | Ighv1-23/It |
| GO_BP_m2GO:000222pattern recognition    | 2/470 | 121/23843 | 0.692113 | 0.791094 | 0.740646 | Mavs/S100   |
| GO_BP_m2GO:005114striated muscle        | 5/470 | 295/23843 | 0.693604 | 0.792582 | 0.742039 | Bmp4/Cd5    |
| GO_BP_m2GO:014001meiotic nuclear        | 3/470 | 181/23843 | 0.695402 | 0.793919 | 0.743291 | Eif4g3/Espl |
| GO_BP_m2GO:000699nucleus organizer      | 2/470 | 122/23843 | 0.696434 | 0.793919 | 0.743291 | H3f3b/Kdmr  |
| GO_BP_m2GO:000273regulation             | 1/470 | 60/23843  | 0.697612 | 0.793919 | 0.743291 | Zbtb1       |
| GO_BP_m2GO:000276positive regulation    | 1/470 | 60/23843  | 0.697612 | 0.793919 | 0.743291 | Id2         |
| GO_BP_m2GO:000627RNA-dependent          | 1/470 | 60/23843  | 0.697612 | 0.793919 | 0.743291 | Aurkb       |
| GO_BP_m2GO:000685drug transporter       | 1/470 | 60/23843  | 0.697612 | 0.793919 | 0.743291 | Slc25a38    |
| GO_BP_m2GO:000700telomere number        | 1/470 | 60/23843  | 0.697612 | 0.793919 | 0.743291 | Aurkb       |
| GO_BP_m2GO:000759lactation              | 1/470 | 60/23843  | 0.697612 | 0.793919 | 0.743291 | Prl8a2      |
| GO_BP_m2GO:000808axo-dendrite           | 1/470 | 60/23843  | 0.697612 | 0.793919 | 0.743291 | Bloc1s2     |
| GO_BP_m2GO:003439protein localization   | 1/470 | 60/23843  | 0.697612 | 0.793919 | 0.743291 | Gpd1l       |
| GO_BP_m2GO:004477mitotic DNA            | 1/470 | 60/23843  | 0.697612 | 0.793919 | 0.743291 | Foxo4       |
| GO_BP_m2GO:005119regulation             | 1/470 | 60/23843  | 0.697612 | 0.793919 | 0.743291 | Pink1       |
| GO_BP_m2GO:007005intrinsic apoptosis    | 1/470 | 60/23843  | 0.697612 | 0.793919 | 0.743291 | Atf4        |
| GO_BP_m2GO:190581regulation             | 1/470 | 60/23843  | 0.697612 | 0.793919 | 0.743291 | Cit         |
| GO_BP_m2GO:200075regulation             | 1/470 | 60/23843  | 0.697612 | 0.793919 | 0.743291 | Auts2       |
| GO_BP_m2GO:004875branching              | 3/470 | 182/23843 | 0.698948 | 0.795223 | 0.744512 | Bmp4/Fkbr   |
| GO_BP_m2GO:004873skeletal system        | 4/470 | 240/23843 | 0.699198 | 0.795293 | 0.744577 | Bmp4/Col2   |
| GO_BP_m2GO:000275innate immunity        | 2/470 | 123/23843 | 0.700704 | 0.796358 | 0.745575 | Mavs/S100   |
| GO_BP_m2GO:000276regulation             | 2/470 | 123/23843 | 0.700704 | 0.796358 | 0.745575 | Id2/Mafb    |
| GO_BP_m2GO:190283regulation             | 2/470 | 123/23843 | 0.700704 | 0.796358 | 0.745575 | Id2/Zc3h12  |
| GO_BP_m2GO:006201positive regulation    | 3/470 | 183/23843 | 0.702461 | 0.79726  | 0.746419 | Rack1/Nr4a  |
| GO_BP_m2GO:200102regulation             | 3/470 | 183/23843 | 0.702461 | 0.79726  | 0.746419 | Cry1/Dyrk1  |

|                                    |           |          |          |          |             |
|------------------------------------|-----------|----------|----------|----------|-------------|
| GO_BP_m2GO:005105regulation 7/470  | 411/23843 | 0.703557 | 0.79726  | 0.746419 | Aurkb/Bmp4  |
| GO_BP_m2GO:001067positive reg1/470 | 61/23843  | 0.703588 | 0.79726  | 0.746419 | Pkfb2       |
| GO_BP_m2GO:001083regulation 1/470  | 61/23843  | 0.703588 | 0.79726  | 0.746419 | Cd53        |
| GO_BP_m2GO:003163zymogen a1/470    | 61/23843  | 0.703588 | 0.79726  | 0.746419 | Plau        |
| GO_BP_m2GO:005043catecholam1/470   | 61/23843  | 0.703588 | 0.79726  | 0.746419 | Pink1       |
| GO_BP_m2GO:005153response tr1/470  | 61/23843  | 0.703588 | 0.79726  | 0.746419 | Jund        |
| GO_BP_m2GO:007126cellular res1/470 | 61/23843  | 0.703588 | 0.79726  | 0.746419 | Mir760      |
| GO_BP_m2GO:190280negative re1/470  | 61/23843  | 0.703588 | 0.79726  | 0.746419 | Zc3h12d     |
| GO_BP_m2GO:200124positive reg1/470 | 61/23843  | 0.703588 | 0.79726  | 0.746419 | Rack1       |
| GO_BP_m2GO:007037positive reg4/470 | 242/23843 | 0.705333 | 0.799022 | 0.748068 | Bmp4/Fgfb   |
| GO_BP_m2GO:000245humoral ir3/470   | 184/23843 | 0.705944 | 0.799354 | 0.74838  | Ighv1-23/lt |
| GO_BP_m2GO:000269regulation 6/470  | 356/23843 | 0.706008 | 0.799354 | 0.74838  | Il12rb1/Ma  |
| GO_BP_m2GO:003109regeneratio2/470  | 125/23843 | 0.709095 | 0.800225 | 0.749194 | Plau/Sulf2  |
| GO_BP_m2GO:000076syncytium i1/470  | 62/23843  | 0.709446 | 0.800225 | 0.749194 | Cd53        |
| GO_BP_m2GO:000183release of c1/470 | 62/23843  | 0.709446 | 0.800225 | 0.749194 | Pink1       |
| GO_BP_m2GO:000924glycolipid k1/470 | 62/23843  | 0.709446 | 0.800225 | 0.749194 | Pigm        |
| GO_BP_m2GO:001591phospholip1/470   | 62/23843  | 0.709446 | 0.800225 | 0.749194 | Osbp15      |
| GO_BP_m2GO:004277ATP synthe1/470   | 62/23843  | 0.709446 | 0.800225 | 0.749194 | Pink1       |
| GO_BP_m2GO:004514homologot1/470    | 62/23843  | 0.709446 | 0.800225 | 0.749194 | Espl1       |
| GO_BP_m2GO:004542regulation 1/470  | 62/23843  | 0.709446 | 0.800225 | 0.749194 | Ptk2b       |
| GO_BP_m2GO:005105positive reg1/470 | 62/23843  | 0.709446 | 0.800225 | 0.749194 | Auts2       |
| GO_BP_m2GO:009027negative re1/470  | 62/23843  | 0.709446 | 0.800225 | 0.749194 | Ucp2        |
| GO_BP_m2GO:190126carbohydrc1/470   | 62/23843  | 0.709446 | 0.800225 | 0.749194 | Slc35a4     |
| GO_BP_m2GO:190367regulation 1/470  | 62/23843  | 0.709446 | 0.800225 | 0.749194 | Pdcd10      |
| GO_BP_m2GO:200024negative re1/470  | 62/23843  | 0.709446 | 0.800225 | 0.749194 | Bmp4        |
| GO_BP_m2GO:200037negative re1/470  | 62/23843  | 0.709446 | 0.800225 | 0.749194 | Pink1       |
| GO_BP_m2GO:000663fatty acid b2/470 | 126/23843 | 0.713217 | 0.804262 | 0.752974 | Acaca/Fads  |
| GO_BP_m2GO:000165branching i1/470  | 63/23843  | 0.715188 | 0.805187 | 0.75384  | Bmp4        |
| GO_BP_m2GO:000931oligosacch:1/470  | 63/23843  | 0.715188 | 0.805187 | 0.75384  | Galnt2      |
| GO_BP_m2GO:004210positive reg1/470 | 63/23843  | 0.715188 | 0.805187 | 0.75384  | Cybb        |
| GO_BP_m2GO:004227purine nucl1/470  | 63/23843  | 0.715188 | 0.805187 | 0.75384  | Ran         |
| GO_BP_m2GO:004396histone H4 1/470  | 63/23843  | 0.715188 | 0.805187 | 0.75384  | Auts2       |
| GO_BP_m2GO:004545cell redox t1/470 | 63/23843  | 0.715188 | 0.805187 | 0.75384  | Txndc5      |
| GO_BP_m2GO:000695complemei3/470    | 187/23843 | 0.716205 | 0.805899 | 0.754506 | Ighv1-23/lt |
| GO_BP_m2GO:001623macroauto 3/470   | 187/23843 | 0.716205 | 0.805899 | 0.754506 | Nbr1/Pink1  |
| GO_BP_m2GO:000270positive reg2/470 | 127/23843 | 0.717289 | 0.806902 | 0.755446 | Stxbp1/Zbt  |
| GO_BP_m2GO:002191neural tubc3/470  | 188/23843 | 0.719563 | 0.80881  | 0.757232 | Bmp4/lft12  |
| GO_BP_m2GO:005067positive reg3/470 | 188/23843 | 0.719563 | 0.80881  | 0.757232 | Bmp4/Glul,  |
| GO_BP_m2GO:005178regulation 3/470  | 188/23843 | 0.719563 | 0.80881  | 0.757232 | Bmp4/Cit/f  |
| GO_BP_m2GO:006054respiratory 4/470 | 247/23843 | 0.720272 | 0.808826 | 0.757248 | Bmp4/Ceb    |
| GO_BP_m2GO:000694syncytium i1/470  | 64/23843  | 0.720818 | 0.808826 | 0.757248 | Cd53        |
| GO_BP_m2GO:003139negative re1/470  | 64/23843  | 0.720818 | 0.808826 | 0.757248 | Cry1        |
| GO_BP_m2GO:003263interleukin:1/470 | 64/23843  | 0.720818 | 0.808826 | 0.757248 | Mavs        |
| GO_BP_m2GO:005178negative re1/470  | 64/23843  | 0.720818 | 0.808826 | 0.757248 | Bmp4        |
| GO_BP_m2GO:006042lung morpl1/470   | 64/23843  | 0.720818 | 0.808826 | 0.757248 | Bmp4        |
| GO_BP_m2GO:005500cardiac mu2/470   | 128/23843 | 0.721313 | 0.808826 | 0.757248 | Bmp4/Myh    |
| GO_BP_m2GO:007145cellular res2/470 | 128/23843 | 0.721313 | 0.808826 | 0.757248 | Cybb/Pink1  |
| GO_BP_m2GO:200125negative re2/470  | 128/23843 | 0.721313 | 0.808826 | 0.757248 | H3f3b/Kdr   |

|                   |              |       |           |          |          |          |             |
|-------------------|--------------|-------|-----------|----------|----------|----------|-------------|
| GO_BP_m2GO:000716 | cell-matrix  | 3/470 | 189/23843 | 0.72289  | 0.80973  | 0.758093 | Plau/Ptk2b  |
| GO_BP_m2GO:001081 | regulation   | 3/470 | 189/23843 | 0.72289  | 0.80973  | 0.758093 | Plau/Ptk2b  |
| GO_BP_m2GO:190290 | positive re  | 3/470 | 189/23843 | 0.72289  | 0.80973  | 0.758093 | Ptk2b/Rac2  |
| GO_BP_m2GO:190303 | positive re  | 3/470 | 189/23843 | 0.72289  | 0.80973  | 0.758093 | Il12rb1/Nr4 |
| GO_BP_m2GO:002240 | regulation   | 6/470 | 363/23843 | 0.723347 | 0.809809 | 0.758168 | Bmp4/Il12r  |
| GO_BP_m2GO:003240 | response tr  | 6/470 | 363/23843 | 0.723347 | 0.809809 | 0.758168 | Jund/Mir14  |
| GO_BP_m2GO:000916 | nucleotide   | 5/470 | 306/23843 | 0.723609 | 0.809886 | 0.75824  | Adsl/Cad/C  |
| GO_BP_m2GO:004484 | cell cycle G | 3/470 | 190/23843 | 0.726187 | 0.811639 | 0.759881 | Id2/Lats2/Z |
| GO_BP_m2GO:000271 | regulation   | 1/470 | 65/23843  | 0.726336 | 0.811639 | 0.759881 | Nr4a3       |
| GO_BP_m2GO:001050 | negative re  | 1/470 | 65/23843  | 0.726336 | 0.811639 | 0.759881 | Pink1       |
| GO_BP_m2GO:003508 | axoneme a    | 1/470 | 65/23843  | 0.726336 | 0.811639 | 0.759881 | Mss51       |
| GO_BP_m2GO:004477 | mitotic DN   | 1/470 | 65/23843  | 0.726336 | 0.811639 | 0.759881 | Foxo4       |
| GO_BP_m2GO:004816 | regulation   | 1/470 | 65/23843  | 0.726336 | 0.811639 | 0.759881 | Rab11a      |
| GO_BP_m2GO:005508 | lipid home   | 2/470 | 130/23843 | 0.729216 | 0.81464  | 0.762691 | Acaca/Ceb   |
| GO_BP_m2GO:000988 | embryonic    | 1/470 | 66/23843  | 0.731745 | 0.816675 | 0.764596 | Ooep        |
| GO_BP_m2GO:001991 | lipid storag | 1/470 | 66/23843  | 0.731745 | 0.816675 | 0.764596 | Cry1        |
| GO_BP_m2GO:190357 | regulation   | 1/470 | 66/23843  | 0.731745 | 0.816675 | 0.764596 | Pink1       |
| GO_BP_m2GO:000919 | ribonucleo   | 4/470 | 251/23843 | 0.731816 | 0.816675 | 0.764596 | Cad/Pfkfb2  |
| GO_BP_m2GO:000920 | ribonucleo   | 2/470 | 131/23843 | 0.733095 | 0.817886 | 0.765729 | Cad/Pfkfb2  |
| GO_BP_m2GO:000150 | regulation   | 5/470 | 310/23843 | 0.733984 | 0.81866  | 0.766454 | Cplx4/Ptk2  |
| GO_BP_m2GO:000694 | regulation   | 1/470 | 67/23843  | 0.737048 | 0.820332 | 0.768019 | Shc1        |
| GO_BP_m2GO:000704 | cell-substr  | 1/470 | 67/23843  | 0.737048 | 0.820332 | 0.768019 | Ptk2b       |
| GO_BP_m2GO:003238 | negative re  | 1/470 | 67/23843  | 0.737048 | 0.820332 | 0.768019 | Ube2j1      |
| GO_BP_m2GO:003304 | regulation   | 1/470 | 67/23843  | 0.737048 | 0.820332 | 0.768019 | Cit         |
| GO_BP_m2GO:003410 | homotypic    | 1/470 | 67/23843  | 0.737048 | 0.820332 | 0.768019 | Stxbp1      |
| GO_BP_m2GO:004804 | focal adhe   | 1/470 | 67/23843  | 0.737048 | 0.820332 | 0.768019 | Ptk2b       |
| GO_BP_m2GO:190488 | cranial skel | 1/470 | 67/23843  | 0.737048 | 0.820332 | 0.768019 | Bmp4        |
| GO_BP_m2GO:190589 | regulation   | 1/470 | 67/23843  | 0.737048 | 0.820332 | 0.768019 | Ube2j1      |
| GO_BP_m2GO:001063 | negative re  | 6/470 | 369/23843 | 0.737634 | 0.820767 | 0.768427 | Bmp4/Dyrk   |
| GO_BP_m2GO:000301 | vascular pr  | 3/470 | 194/23843 | 0.739067 | 0.822143 | 0.769715 | Fgfbp3/Pt   |
| GO_BP_m2GO:000915 | purine ribo  | 4/470 | 254/23843 | 0.740237 | 0.822843 | 0.770371 | Adsl/Gucy2  |
| GO_BP_m2GO:005192 | regulation   | 4/470 | 254/23843 | 0.740237 | 0.822843 | 0.770371 | Bmp4/Chd    |
| GO_BP_m2GO:000626 | DNA-depe     | 2/470 | 133/23843 | 0.740713 | 0.822843 | 0.770371 | Bmp4/Wdr    |
| GO_BP_m2GO:003527 | endocrine    | 2/470 | 133/23843 | 0.740713 | 0.822843 | 0.770371 | Bmp4/Six3   |
| GO_BP_m2GO:005070 | negative re  | 2/470 | 133/23843 | 0.740713 | 0.822843 | 0.770371 | Syt11/Ucp2  |
| GO_BP_m2GO:000676 | vitamin me   | 1/470 | 68/23843  | 0.742246 | 0.822843 | 0.770371 | Pm20d2      |
| GO_BP_m2GO:003241 | negative re  | 1/470 | 68/23843  | 0.742246 | 0.822843 | 0.770371 | Agrn        |
| GO_BP_m2GO:003248 | Rab protei   | 1/470 | 68/23843  | 0.742246 | 0.822843 | 0.770371 | Rab11a      |
| GO_BP_m2GO:006104 | negative re  | 1/470 | 68/23843  | 0.742246 | 0.822843 | 0.770371 | Plau        |
| GO_BP_m2GO:007037 | negative re  | 1/470 | 68/23843  | 0.742246 | 0.822843 | 0.770371 | Csk         |
| GO_BP_m2GO:009732 | response tr  | 1/470 | 68/23843  | 0.742246 | 0.822843 | 0.770371 | Bmp4        |
| GO_BP_m2GO:190198 | regulation   | 1/470 | 68/23843  | 0.742246 | 0.822843 | 0.770371 | Auts2       |
| GO_BP_m2GO:190442 | positive re  | 1/470 | 68/23843  | 0.742246 | 0.822843 | 0.770371 | Bmp4        |
| GO_BP_m2GO:001401 | regulation   | 2/470 | 134/23843 | 0.744452 | 0.825071 | 0.772457 | Bmp4/Id2    |
| GO_BP_m2GO:000836 | regulation   | 3/470 | 196/23843 | 0.745325 | 0.82582  | 0.773158 | Rab11a/Rn   |
| GO_BP_m2GO:006048 | mesenchyr    | 4/470 | 256/23843 | 0.745739 | 0.826061 | 0.773383 | Bambi/Bm    |
| GO_BP_m2GO:000608 | cellular ald | 1/470 | 69/23843  | 0.747341 | 0.826745 | 0.774023 | Kdm3a       |
| GO_BP_m2GO:004864 | animal org   | 1/470 | 69/23843  | 0.747341 | 0.826745 | 0.774023 | Bmp4        |

|                                      |           |          |          |          |             |
|--------------------------------------|-----------|----------|----------|----------|-------------|
| GO_BP_m2GO:006015regulation 1/470    | 69/23843  | 0.747341 | 0.826745 | 0.774023 | Sele        |
| GO_BP_m2GO:006067ureteric bu 1/470   | 69/23843  | 0.747341 | 0.826745 | 0.774023 | Bmp4        |
| GO_BP_m2GO:190195positive re 1/470   | 69/23843  | 0.747341 | 0.826745 | 0.774023 | Rab11a      |
| GO_BP_m2GO:190285microtubul 2/470    | 135/23843 | 0.748144 | 0.827415 | 0.774651 | Aurkb/Rab   |
| GO_BP_m2GO:190165cellular res 4/470  | 257/23843 | 0.748457 | 0.827542 | 0.774777 | Csk/Foxo4/  |
| GO_BP_m2GO:000225activation c 8/470  | 488/23843 | 0.74888  | 0.827792 | 0.775004 | Csk/Ighv1-  |
| GO_BP_m2GO:004566positive re 7/470   | 432/23843 | 0.750582 | 0.829456 | 0.776561 | Bmp4/Ect2   |
| GO_BP_m2GO:000173morphoge 1/470      | 70/23843  | 0.752336 | 0.830082 | 0.777148 | Sfrp2       |
| GO_BP_m2GO:000605glycolytic p 1/470  | 70/23843  | 0.752336 | 0.830082 | 0.777148 | Pfkfb2      |
| GO_BP_m2GO:00068C nitric oxide 1/470 | 70/23843  | 0.752336 | 0.830082 | 0.777148 | Ptk2b       |
| GO_BP_m2GO:000742peripheral 1/470    | 70/23843  | 0.752336 | 0.830082 | 0.777148 | Adgrg6      |
| GO_BP_m2GO:007217mesoneph 1/470      | 70/23843  | 0.752336 | 0.830082 | 0.777148 | Bmp4        |
| GO_BP_m2GO:190188negative re 1/470   | 70/23843  | 0.752336 | 0.830082 | 0.777148 | Twf1        |
| GO_BP_m2GO:007122cellular res 4/470  | 259/23843 | 0.753825 | 0.831348 | 0.778333 | Mir146b/P   |
| GO_BP_m2GO:007037regulation 5/470    | 318/23843 | 0.75388  | 0.831348 | 0.778333 | Bmp4/Csk/   |
| GO_BP_m2GO:000912purine nuc 2/470    | 137/23843 | 0.755392 | 0.83236  | 0.77928  | Adsl/Pfkfb2 |
| GO_BP_m2GO:000916purine ribo 2/470   | 137/23843 | 0.755392 | 0.83236  | 0.77928  | Adsl/Pfkfb2 |
| GO_BP_m2GO:19029C negative re 2/470  | 137/23843 | 0.755392 | 0.83236  | 0.77928  | Dyrk1a/Tw   |
| GO_BP_m2GO:000265positive re 7/470   | 435/23843 | 0.756846 | 0.833567 | 0.78041  | Ighv1-23/I  |
| GO_BP_m2GO:000675ATP gener 1/470     | 71/23843  | 0.757232 | 0.833567 | 0.78041  | Pfkfb2      |
| GO_BP_m2GO:007238organelle t 1/470   | 71/23843  | 0.757232 | 0.833567 | 0.78041  | Bloc1s2     |
| GO_BP_m2GO:00027C regulation 3/470   | 200/23843 | 0.757481 | 0.833567 | 0.78041  | Rac2/Stxbp  |
| GO_BP_m2GO:007237protein act 3/470   | 200/23843 | 0.757481 | 0.833567 | 0.78041  | Ighv1-23/I  |
| GO_BP_m2GO:001082positive re 2/470   | 138/23843 | 0.758948 | 0.834697 | 0.781469 | Pink1/Rac2  |
| GO_BP_m2GO:190195negative re 2/470   | 138/23843 | 0.758948 | 0.834697 | 0.781469 | Foxo4/Zc3l  |
| GO_BP_m2GO:000616purine nuc 4/470    | 261/23843 | 0.759105 | 0.834697 | 0.781469 | Adsl/Gucy2  |
| GO_BP_m2GO:000206columnar/c 1/470    | 72/23843  | 0.762032 | 0.836382 | 0.783046 | Bmp4        |
| GO_BP_m2GO:001485striated mu 1/470   | 72/23843  | 0.762032 | 0.836382 | 0.783046 | Prkar1a     |
| GO_BP_m2GO:00303C cholesterol 1/470  | 72/23843  | 0.762032 | 0.836382 | 0.783046 | Acat2       |
| GO_BP_m2GO:00308C regulation 1/470   | 72/23843  | 0.762032 | 0.836382 | 0.783046 | Ptk2b       |
| GO_BP_m2GO:004567regulation 1/470    | 72/23843  | 0.762032 | 0.836382 | 0.783046 | Mafb        |
| GO_BP_m2GO:005185modificati 1/470    | 72/23843  | 0.762032 | 0.836382 | 0.783046 | Ppib        |
| GO_BP_m2GO:00550C cardiac mu 1/470   | 72/23843  | 0.762032 | 0.836382 | 0.783046 | Chd7        |
| GO_BP_m2GO:005134positive re 8/470   | 495/23843 | 0.762587 | 0.836772 | 0.783411 | Agrn/Ect2/  |
| GO_BP_m2GO:000628DNA repair 7/470    | 438/23843 | 0.762997 | 0.837003 | 0.783627 | Asf1a/Cdc5  |
| GO_BP_m2GO:004244hormone n 3/470     | 202/23843 | 0.763382 | 0.837206 | 0.783817 | Crym/Pcsk   |
| GO_BP_m2GO:005086regulation 4/470    | 263/23843 | 0.764297 | 0.837991 | 0.784552 | Id2/Ighv1-  |
| GO_BP_m2GO:000221activation c 2/470  | 140/23843 | 0.765926 | 0.839119 | 0.785609 | Mavs/S100   |
| GO_BP_m2GO:004501glycerolipic 2/470  | 140/23843 | 0.765926 | 0.839119 | 0.785609 | Cdipt/Pigr  |
| GO_BP_m2GO:004558regulation 2/470    | 140/23843 | 0.765926 | 0.839119 | 0.785609 | Bmp4/Zbtb   |
| GO_BP_m2GO:001591sterol trans 1/470  | 73/23843  | 0.766737 | 0.839131 | 0.78562  | Acat2       |
| GO_BP_m2GO:00435C positive re 1/470  | 73/23843  | 0.766737 | 0.839131 | 0.78562  | Ptk2b       |
| GO_BP_m2GO:00462C nitric oxide 1/470 | 73/23843  | 0.766737 | 0.839131 | 0.78562  | Ptk2b       |
| GO_BP_m2GO:006151myeloid ce 1/470    | 73/23843  | 0.766737 | 0.839131 | 0.78562  | Jmjd6       |
| GO_BP_m2GO:004573positive re 3/470   | 204/23843 | 0.769166 | 0.841551 | 0.787885 | Rack1/Ptk2  |
| GO_BP_m2GO:000915ribonucleo 2/470    | 141/23843 | 0.769349 | 0.841551 | 0.787885 | Adsl/Pfkfb2 |
| GO_BP_m2GO:000223response tr 6/470   | 384/23843 | 0.77103  | 0.841764 | 0.788085 | Jund/Mir14  |
| GO_BP_m2GO:001401positive re 1/470   | 74/23843  | 0.77135  | 0.841764 | 0.788085 | Id2         |

|                               |       |           |          |          |          |            |
|-------------------------------|-------|-----------|----------|----------|----------|------------|
| GO_BP_m2GO:001973antibacteri  | 1/470 | 74/23843  | 0.77135  | 0.841764 | 0.788085 | Rnase6     |
| GO_BP_m2GO:003272positive re  | 1/470 | 74/23843  | 0.77135  | 0.841764 | 0.788085 | Il12rb1    |
| GO_BP_m2GO:004286pyruvate bi  | 1/470 | 74/23843  | 0.77135  | 0.841764 | 0.788085 | Pfkfb2     |
| GO_BP_m2GO:004678microtubul   | 1/470 | 74/23843  | 0.77135  | 0.841764 | 0.788085 | Dyrk1a     |
| GO_BP_m2GO:005178positive re  | 1/470 | 74/23843  | 0.77135  | 0.841764 | 0.788085 | Eif4g3     |
| GO_BP_m2GO:007167mononucle    | 1/470 | 74/23843  | 0.77135  | 0.841764 | 0.788085 | S100a14    |
| GO_BP_m2GO:009873import ac    | 1/470 | 74/23843  | 0.77135  | 0.841764 | 0.788085 | Slc25a38   |
| GO_BP_m2GO:007252purine-cor   | 4/470 | 266/23843 | 0.771922 | 0.84217  | 0.788464 | Adsl/Gucy2 |
| GO_BP_m2GO:000279negative re  | 2/470 | 142/23843 | 0.772729 | 0.842612 | 0.788878 | Syt11/Ucp2 |
| GO_BP_m2GO:007146cellular res | 2/470 | 142/23843 | 0.772729 | 0.842612 | 0.788878 | Bmp4/Cyp   |
| GO_BP_m2GO:000701actin filam  | 6/470 | 385/23843 | 0.77314  | 0.842841 | 0.789093 | Cit/Mir129 |
| GO_BP_m2GO:005070regulation   | 7/470 | 444/23843 | 0.774959 | 0.844605 | 0.790744 | Glul/Mavs/ |
| GO_BP_m2GO:001922regulation   | 1/470 | 75/23843  | 0.775871 | 0.844932 | 0.79105  | Shc1       |
| GO_BP_m2GO:003247regulation   | 1/470 | 75/23843  | 0.775871 | 0.844932 | 0.79105  | Mavs       |
| GO_BP_m2GO:009775positive re  | 1/470 | 75/23843  | 0.775871 | 0.844932 | 0.79105  | Ptprm      |
| GO_BP_m2GO:003085regulation   | 2/470 | 143/23843 | 0.776065 | 0.844932 | 0.79105  | Bmp4/Foxa  |
| GO_BP_m2GO:007121cellular res | 4/470 | 268/23843 | 0.776897 | 0.845412 | 0.791501 | Mir146b/P  |
| GO_BP_m2GO:007083divalent m   | 7/470 | 445/23843 | 0.776909 | 0.845412 | 0.791501 | Bmp4/Chd   |
| GO_BP_m2GO:001095positive re  | 2/470 | 144/23843 | 0.779358 | 0.846471 | 0.792492 | Rack1/Sfrp |
| GO_BP_m2GO:004583positive re  | 2/470 | 144/23843 | 0.779358 | 0.846471 | 0.792492 | Nr4a3/Ptk2 |
| GO_BP_m2GO:000691activation   | 1/470 | 76/23843  | 0.780303 | 0.846471 | 0.792492 | Rack1      |
| GO_BP_m2GO:000704cell-substr  | 1/470 | 76/23843  | 0.780303 | 0.846471 | 0.792492 | Ptk2b      |
| GO_BP_m2GO:002187forebrain n  | 1/470 | 76/23843  | 0.780303 | 0.846471 | 0.792492 | Sall3      |
| GO_BP_m2GO:003433adherens j   | 1/470 | 76/23843  | 0.780303 | 0.846471 | 0.792492 | Ptk2b      |
| GO_BP_m2GO:004591positive re  | 1/470 | 76/23843  | 0.780303 | 0.846471 | 0.792492 | Pfkfb2     |
| GO_BP_m2GO:005138response t   | 1/470 | 76/23843  | 0.780303 | 0.846471 | 0.792492 | Bmp4       |
| GO_BP_m2GO:005193catecholam   | 1/470 | 76/23843  | 0.780303 | 0.846471 | 0.792492 | Pink1      |
| GO_BP_m2GO:005196positive re  | 1/470 | 76/23843  | 0.780303 | 0.846471 | 0.792492 | Agrn       |
| GO_BP_m2GO:006118mammary      | 1/470 | 76/23843  | 0.780303 | 0.846471 | 0.792492 | Id2        |
| GO_BP_m2GO:190332negative re  | 1/470 | 76/23843  | 0.780303 | 0.846471 | 0.792492 | Cry1       |
| GO_BP_m2GO:001993cAMP-mec     | 2/470 | 145/23843 | 0.782609 | 0.848616 | 0.794499 | Adgrg6/Pe  |
| GO_BP_m2GO:007251divalent in  | 7/470 | 448/23843 | 0.782684 | 0.848616 | 0.794499 | Bmp4/Chd   |
| GO_BP_m2GO:005086positive re  | 7/470 | 449/23843 | 0.784584 | 0.849427 | 0.795259 | Ighv1-23/I |
| GO_BP_m2GO:003241negative re  | 1/470 | 77/23843  | 0.784647 | 0.849427 | 0.795259 | Agrn       |
| GO_BP_m2GO:004324negative re  | 1/470 | 77/23843  | 0.784647 | 0.849427 | 0.795259 | Twf1       |
| GO_BP_m2GO:005134regulation   | 1/470 | 77/23843  | 0.784647 | 0.849427 | 0.795259 | Ptk2b      |
| GO_BP_m2GO:005170interaction  | 1/470 | 77/23843  | 0.784647 | 0.849427 | 0.795259 | Ppib       |
| GO_BP_m2GO:006011inner ear    | 1/470 | 77/23843  | 0.784647 | 0.849427 | 0.795259 | Bmp4       |
| GO_BP_m2GO:005149negative re  | 2/470 | 146/23843 | 0.785817 | 0.850267 | 0.796045 | Dyrk1a/Tw  |
| GO_BP_m2GO:004563regulation   | 3/470 | 210/23843 | 0.785828 | 0.850267 | 0.796045 | Id2/Mafb/F |
| GO_BP_m2GO:004521cell-cell j  | 3/470 | 211/23843 | 0.788506 | 0.850392 | 0.796163 | Csk/Ect2/P |
| GO_BP_m2GO:001403neural cres  | 1/470 | 78/23843  | 0.788906 | 0.850392 | 0.796163 | Bmp4       |
| GO_BP_m2GO:003016platelet act | 1/470 | 78/23843  | 0.788906 | 0.850392 | 0.796163 | Stxbp1     |
| GO_BP_m2GO:003019regulation   | 1/470 | 78/23843  | 0.788906 | 0.850392 | 0.796163 | Plau       |
| GO_BP_m2GO:003260type I inter | 1/470 | 78/23843  | 0.788906 | 0.850392 | 0.796163 | Mavs       |
| GO_BP_m2GO:004584positive re  | 1/470 | 78/23843  | 0.788906 | 0.850392 | 0.796163 | Bmp4       |
| GO_BP_m2GO:004603ADP metak    | 1/470 | 78/23843  | 0.788906 | 0.850392 | 0.796163 | Pfkfb2     |
| GO_BP_m2GO:004653photorecep   | 1/470 | 78/23843  | 0.788906 | 0.850392 | 0.796163 | Rom1       |



|                                |       |           |          |          |          |             |
|--------------------------------|-------|-----------|----------|----------|----------|-------------|
| GO_BP_m2GO:004863positive re   | 1/470 | 78/23843  | 0.788906 | 0.850392 | 0.796163 | Bmp4        |
| GO_BP_m2GO:004870astrocyte d   | 1/470 | 78/23843  | 0.788906 | 0.850392 | 0.796163 | Id2         |
| GO_BP_m2GO:007207nephron tu    | 1/470 | 78/23843  | 0.788906 | 0.850392 | 0.796163 | Bmp4        |
| GO_BP_m2GO:190004regulation 1  | /470  | 78/23843  | 0.788906 | 0.850392 | 0.796163 | Plau        |
| GO_BP_m2GO:200105reactive nit  | 1/470 | 78/23843  | 0.788906 | 0.850392 | 0.796163 | Ptk2b       |
| GO_BP_m2GO:000282regulation 2  | /470  | 147/23843 | 0.788984 | 0.850392 | 0.796163 | Il12rb1/Zbt |
| GO_BP_m2GO:000912nucleoside 2  | /470  | 147/23843 | 0.788984 | 0.850392 | 0.796163 | Adsl/Pfkfb2 |
| GO_BP_m2GO:000246adaptive in   | 6/470 | 393/23843 | 0.789494 | 0.850723 | 0.796472 | Ighv1-23/I  |
| GO_BP_m2GO:003295regulation 5  | /470  | 334/23843 | 0.790302 | 0.851376 | 0.797083 | Cit/Ptk2b/F |
| GO_BP_m2GO:006032cell chemo    | 4/470 | 274/23843 | 0.791308 | 0.852241 | 0.797893 | Pde4d/Ptk2  |
| GO_BP_m2GO:000719adenylate c   | 1/470 | 79/23843  | 0.793081 | 0.853055 | 0.798656 | Grm7        |
| GO_BP_m2GO:003304regulation 1  | /470  | 79/23843  | 0.793081 | 0.853055 | 0.798656 | Cit         |
| GO_BP_m2GO:003410regulation 1  | /470  | 79/23843  | 0.793081 | 0.853055 | 0.798656 | Csk         |
| GO_BP_m2GO:190186positive re   | 1/470 | 79/23843  | 0.793081 | 0.853055 | 0.798656 | Bmp4        |
| GO_BP_m2GO:190403regulation 1  | /470  | 79/23843  | 0.793081 | 0.853055 | 0.798656 | Bmp4        |
| GO_BP_m2GO:000681sodium ion    | 3/470 | 213/23843 | 0.793779 | 0.853588 | 0.799154 | Agrn/Mfsd   |
| GO_BP_m2GO:007037ERK1 and E    | 5/470 | 336/23843 | 0.794546 | 0.854193 | 0.799721 | Bmp4/Csk/   |
| GO_BP_m2GO:000224hematopoi     | 2/470 | 149/23843 | 0.795195 | 0.854452 | 0.799964 | Bmp4/Zbt    |
| GO_BP_m2GO:000717transformir   | 2/470 | 149/23843 | 0.795195 | 0.854452 | 0.799964 | Bambi/Tgfl  |
| GO_BP_m2GO:003032lung devel    | 3/470 | 214/23843 | 0.796375 | 0.855265 | 0.800724 | Bmp4/Ceb    |
| GO_BP_m2GO:001097positive re   | 5/470 | 337/23843 | 0.796642 | 0.855265 | 0.800724 | Bmp4/Ptk2   |
| GO_BP_m2GO:002290respiratory 1 | /470  | 80/23843  | 0.797173 | 0.855265 | 0.800724 | Pink1       |
| GO_BP_m2GO:003196response tr   | 1/470 | 80/23843  | 0.797173 | 0.855265 | 0.800724 | Bmp4        |
| GO_BP_m2GO:003505embryonic 1   | /470  | 80/23843  | 0.797173 | 0.855265 | 0.800724 | Ift122      |
| GO_BP_m2GO:007208nephron e     | 1/470 | 80/23843  | 0.797173 | 0.855265 | 0.800724 | Bmp4        |
| GO_BP_m2GO:000193positive re   | 1/470 | 81/23843  | 0.801185 | 0.858533 | 0.803785 | Bmp4        |
| GO_BP_m2GO:001574organophc     | 1/470 | 81/23843  | 0.801185 | 0.858533 | 0.803785 | Osbpl5      |
| GO_BP_m2GO:007202nephron m     | 1/470 | 81/23843  | 0.801185 | 0.858533 | 0.803785 | Bmp4        |
| GO_BP_m2GO:190198positive re   | 1/470 | 81/23843  | 0.801185 | 0.858533 | 0.803785 | Rab11a      |
| GO_BP_m2GO:001095positive re   | 2/470 | 151/23843 | 0.801243 | 0.858533 | 0.803785 | Rack1/Sfrp  |
| GO_BP_m2GO:003032respiratory 3 | /470  | 217/23843 | 0.803998 | 0.861265 | 0.806342 | Bmp4/Ceb    |
| GO_BP_m2GO:000042autophagy 1   | /470  | 82/23843  | 0.805118 | 0.861365 | 0.806436 | Pink1       |
| GO_BP_m2GO:003111regulation 1  | /470  | 82/23843  | 0.805118 | 0.861365 | 0.806436 | Dyrk1a      |
| GO_BP_m2GO:005081regulation 1  | /470  | 82/23843  | 0.805118 | 0.861365 | 0.806436 | Plau        |
| GO_BP_m2GO:006172mitochond     | 1/470 | 82/23843  | 0.805118 | 0.861365 | 0.806436 | Pink1       |
| GO_BP_m2GO:007233intrinsic ap  | 1/470 | 82/23843  | 0.805118 | 0.861365 | 0.806436 | Rrp8        |
| GO_BP_m2GO:000718G-protein c   | 3/470 | 218/23843 | 0.806485 | 0.862608 | 0.807599 | Adgrg6/Gp   |
| GO_BP_m2GO:000961response tr   | 7/470 | 462/23843 | 0.808169 | 0.862849 | 0.807825 | 2210409DC   |
| GO_BP_m2GO:001094negative re   | 3/470 | 219/23843 | 0.808946 | 0.862849 | 0.807825 | Bmp4/Foxc   |
| GO_BP_m2GO:006113morphoge      | 3/470 | 219/23843 | 0.808946 | 0.862849 | 0.807825 | Bmp4/Fkbr   |
| GO_BP_m2GO:000722integrin-m    | 1/470 | 83/23843  | 0.808972 | 0.862849 | 0.807825 | Ptk2b       |
| GO_BP_m2GO:000913purine nuc    | 1/470 | 83/23843  | 0.808972 | 0.862849 | 0.807825 | Pfkfb2      |
| GO_BP_m2GO:000917purine ribo   | 1/470 | 83/23843  | 0.808972 | 0.862849 | 0.807825 | Pfkfb2      |
| GO_BP_m2GO:001403mesenchyr     | 1/470 | 83/23843  | 0.808972 | 0.862849 | 0.807825 | Bmp4        |
| GO_BP_m2GO:003275positive re   | 1/470 | 83/23843  | 0.808972 | 0.862849 | 0.807825 | Mavs        |
| GO_BP_m2GO:004249mechanore     | 1/470 | 83/23843  | 0.808972 | 0.862849 | 0.807825 | Bmp4        |
| GO_BP_m2GO:190187regulation 1  | /470  | 83/23843  | 0.808972 | 0.862849 | 0.807825 | Twf1        |
| GO_BP_m2GO:190303negative re   | 1/470 | 83/23843  | 0.808972 | 0.862849 | 0.807825 | Plau        |

|                                     |           |          |          |          |             |
|-------------------------------------|-----------|----------|----------|----------|-------------|
| GO_BP_m2GO:190198negative re2/470   | 154/23843 | 0.810019 | 0.863746 | 0.808665 | Foxo4/Zc3l  |
| GO_BP_m2GO:005087positive reç3/470  | 220/23843 | 0.81138  | 0.864905 | 0.80975  | Ighv1-23/Ig |
| GO_BP_m2GO:19021Cregulation 4/470   | 283/23843 | 0.811518 | 0.864905 | 0.80975  | Bmp4/Id2/   |
| GO_BP_m2GO:001935nicotinamic1/470   | 84/23843  | 0.812751 | 0.865024 | 0.809861 | Pfkfb2      |
| GO_BP_m2GO:004886stem cell d1/470   | 84/23843  | 0.812751 | 0.865024 | 0.809861 | Bmp4        |
| GO_BP_m2GO:006133renal tubul1/470   | 84/23843  | 0.812751 | 0.865024 | 0.809861 | Bmp4        |
| GO_BP_m2GO:009706dendritic sç1/470  | 84/23843  | 0.812751 | 0.865024 | 0.809861 | Mtmr2       |
| GO_BP_m2GO:190352positive reç1/470  | 84/23843  | 0.812751 | 0.865024 | 0.809861 | Shc1        |
| GO_BP_m2GO:000657cellular mo2/470   | 155/23843 | 0.812867 | 0.865024 | 0.809861 | Crym/Pm2l   |
| GO_BP_m2GO:004586negative re5/470   | 346/23843 | 0.814762 | 0.866425 | 0.811174 | Alad/Ambp   |
| GO_BP_m2GO:000865phospholipç2/470   | 156/23843 | 0.815676 | 0.866425 | 0.811174 | Cdipt/Pigr  |
| GO_BP_m2GO:00458Cpositive reç2/470  | 156/23843 | 0.815676 | 0.866425 | 0.811174 | Sele/Tsg10  |
| GO_BP_m2GO:004593negative re3/470   | 222/23843 | 0.81617  | 0.866425 | 0.811174 | Bmp4/Foxc   |
| GO_BP_m2GO:000236cytokine pr1/470   | 85/23843  | 0.816455 | 0.866425 | 0.811174 | Nr4a3       |
| GO_BP_m2GO:00027Cpositive reç1/470  | 85/23843  | 0.816455 | 0.866425 | 0.811174 | Nr4a3       |
| GO_BP_m2GO:001403neural cres1/470   | 85/23843  | 0.816455 | 0.866425 | 0.811174 | Bmp4        |
| GO_BP_m2GO:00229Celectron trç1/470  | 85/23843  | 0.816455 | 0.866425 | 0.811174 | Pink1       |
| GO_BP_m2GO:004247odontogen1/470     | 85/23843  | 0.816455 | 0.866425 | 0.811174 | Bmp4        |
| GO_BP_m2GO:006041muscle tiss1/470   | 85/23843  | 0.816455 | 0.866425 | 0.811174 | Chd7        |
| GO_BP_m2GO:006184antimicrob1/470    | 85/23843  | 0.816455 | 0.866425 | 0.811174 | Rnase6      |
| GO_BP_m2GO:002241cellular cor5/470  | 347/23843 | 0.816693 | 0.866459 | 0.811205 | 2810006K2   |
| GO_BP_m2GO:000611oxidative p1/470   | 86/23843  | 0.820086 | 0.86918  | 0.813752 | Pink1       |
| GO_BP_m2GO:00093Camine met.1/470    | 86/23843  | 0.820086 | 0.86918  | 0.813752 | Inmt        |
| GO_BP_m2GO:001922transmissic1/470   | 86/23843  | 0.820086 | 0.86918  | 0.813752 | Grm7        |
| GO_BP_m2GO:004315negative re1/470   | 86/23843  | 0.820086 | 0.86918  | 0.813752 | Sfrp2       |
| GO_BP_m2GO:00224Cpositive reç3/470  | 224/23843 | 0.820856 | 0.869467 | 0.814021 | Il12rb1/Nr4 |
| GO_BP_m2GO:007121cellular resç4/470 | 288/23843 | 0.822039 | 0.869467 | 0.814021 | Mir146b/Pi  |
| GO_BP_m2GO:005109positive reç3/470  | 225/23843 | 0.823161 | 0.869467 | 0.814021 | Mavs/Mbtp   |
| GO_BP_m2GO:000918ribonucleo:1/470   | 87/23843  | 0.823646 | 0.869467 | 0.814021 | Pfkfb2      |
| GO_BP_m2GO:001936pyridine nu1/470   | 87/23843  | 0.823646 | 0.869467 | 0.814021 | Pfkfb2      |
| GO_BP_m2GO:003101pancreas d1/470    | 87/23843  | 0.823646 | 0.869467 | 0.814021 | Bmp4        |
| GO_BP_m2GO:003252response tr1/470   | 87/23843  | 0.823646 | 0.869467 | 0.814021 | Ptk2b       |
| GO_BP_m2GO:003444substrate a1/470   | 87/23843  | 0.823646 | 0.869467 | 0.814021 | Vamp3       |
| GO_BP_m2GO:010602neuron prc1/470    | 87/23843  | 0.823646 | 0.869467 | 0.814021 | Mtmr2       |
| GO_BP_m2GO:000281regulation 2/470   | 159/23843 | 0.82388  | 0.869467 | 0.814021 | Il12rb1/Zbt |
| GO_BP_m2GO:000703vacuole orç2/470   | 159/23843 | 0.82388  | 0.869467 | 0.814021 | Pink1/Ralb  |
| GO_BP_m2GO:000708regulation 2/470   | 159/23843 | 0.82388  | 0.869467 | 0.814021 | Bmp4/Cit    |
| GO_BP_m2GO:000759blood coaç2/470    | 159/23843 | 0.82388  | 0.869467 | 0.814021 | Plau/Stxbp  |
| GO_BP_m2GO:003529regulation 2/470   | 159/23843 | 0.82388  | 0.869467 | 0.814021 | Ptprm/Shc:  |
| GO_BP_m2GO:005101actin filameç2/470 | 159/23843 | 0.82388  | 0.869467 | 0.814021 | Ptk2b/Spire |
| GO_BP_m2GO:009774regulation 2/470   | 159/23843 | 0.82388  | 0.869467 | 0.814021 | Ptprm/Shc:  |
| GO_BP_m2GO:19021Cpositive reç2/470  | 159/23843 | 0.82388  | 0.869467 | 0.814021 | Id2/Zbtb1   |
| GO_BP_m2GO:004441interspecie 6/470  | 412/23843 | 0.824714 | 0.870129 | 0.814641 | Chmp3/Mæ    |
| GO_BP_m2GO:000695humoral ir5/470    | 352/23843 | 0.826109 | 0.871162 | 0.815608 | Ifna4/Ighv1 |
| GO_BP_m2GO:004217regulation 5/470   | 352/23843 | 0.826109 | 0.871162 | 0.815608 | Alad/Rack1  |
| GO_BP_m2GO:000004transition n1/470  | 88/23843  | 0.827135 | 0.871368 | 0.815801 | Slc25a28    |
| GO_BP_m2GO:004558positive reç1/470  | 88/23843  | 0.827135 | 0.871368 | 0.815801 | Zbtb1       |
| GO_BP_m2GO:19026Cproton trar1/470   | 88/23843  | 0.827135 | 0.871368 | 0.815801 | Atp6v1h     |

|                                     |           |          |          |          |            |
|-------------------------------------|-----------|----------|----------|----------|------------|
| GO_BP_m2GO:190342regulation 1/470   | 88/23843  | 0.827135 | 0.871368 | 0.815801 | Ptk2b      |
| GO_BP_m2GO:000759hemostasis2/470    | 161/23843 | 0.829166 | 0.873288 | 0.817599 | Plau/Stxbp |
| GO_BP_m2GO:00017Ccell fate sp1/470  | 89/23843  | 0.830555 | 0.874093 | 0.818352 | Sfrp2      |
| GO_BP_m2GO:005502regulation 1/470   | 89/23843  | 0.830555 | 0.874093 | 0.818352 | Bmp4       |
| GO_BP_m2GO:00705Eresponse tr1/470   | 89/23843  | 0.830555 | 0.874093 | 0.818352 | Sele       |
| GO_BP_m2GO:004312regulation 2/470   | 162/23843 | 0.831755 | 0.874698 | 0.818918 | Pink1/Tme  |
| GO_BP_m2GO:006157actin filame2/470  | 162/23843 | 0.831755 | 0.874698 | 0.818918 | Ptk2b/Spir |
| GO_BP_m2GO:200124regulation 2/470   | 162/23843 | 0.831755 | 0.874698 | 0.818918 | Rack1/Pink |
| GO_BP_m2GO:004206gliogenesis4/470   | 293/23843 | 0.832071 | 0.874811 | 0.819024 | Adgrg6/Bn  |
| GO_BP_m2GO:00466Eresponse tr1/470   | 90/23843  | 0.833908 | 0.876505 | 0.820611 | Jund       |
| GO_BP_m2GO:005081coagulation2/470   | 163/23843 | 0.834309 | 0.876505 | 0.820611 | Plau/Stxbp |
| GO_BP_m2GO:00343Ecell junctio3/470  | 230/23843 | 0.834309 | 0.876505 | 0.820611 | Csk/Ect2/P |
| GO_BP_m2GO:000181negative re3/470   | 231/23843 | 0.836465 | 0.87855  | 0.822525 | Csk/Suz12/ |
| GO_BP_m2GO:00350Ecardiocyte 2/470   | 164/23843 | 0.836827 | 0.87871  | 0.822675 | Bmp4/Myh   |
| GO_BP_m2GO:007252pyridine-cc1/470   | 91/23843  | 0.837194 | 0.878876 | 0.82283  | Pfkfb2     |
| GO_BP_m2GO:000222toll-like rec1/470 | 92/23843  | 0.840416 | 0.881376 | 0.82517  | S100a14    |
| GO_BP_m2GO:005181modificatic1/470   | 92/23843  | 0.840416 | 0.881376 | 0.82517  | Ppib       |
| GO_BP_m2GO:005501cardiac mu1/470    | 92/23843  | 0.840416 | 0.881376 | 0.82517  | Prkar1a    |
| GO_BP_m2GO:00603Eresponse tr1/470   | 92/23843  | 0.840416 | 0.881376 | 0.82517  | Atf4       |
| GO_BP_m2GO:00064Eprotein lipi1/470  | 93/23843  | 0.843574 | 0.884246 | 0.827857 | Pigm       |
| GO_BP_m2GO:00347Ecellular hor1/470  | 93/23843  | 0.843574 | 0.884246 | 0.827857 | Sgpl1      |
| GO_BP_m2GO:001972calcium-m2/470     | 167/23843 | 0.844177 | 0.884436 | 0.828035 | Pde4d/Ptk  |
| GO_BP_m2GO:00712Ecellular res2/470  | 167/23843 | 0.844177 | 0.884436 | 0.828035 | Mir346/Mir |
| GO_BP_m2GO:00434Enegative re2/470   | 168/23843 | 0.846559 | 0.886162 | 0.829652 | Hr/Id2     |
| GO_BP_m2GO:000157microtubul1/470    | 94/23843  | 0.846669 | 0.886162 | 0.829652 | Mss51      |
| GO_BP_m2GO:001584monoamin1/470      | 94/23843  | 0.846669 | 0.886162 | 0.829652 | Pink1      |
| GO_BP_m2GO:00519Eregulation 1/470   | 94/23843  | 0.846669 | 0.886162 | 0.829652 | Agrn       |
| GO_BP_m2GO:00017E morphoge3/470     | 237/23843 | 0.848899 | 0.887361 | 0.830774 | Bmp4/Fkbp  |
| GO_BP_m2GO:00020Eepithelial c3/470  | 237/23843 | 0.848899 | 0.887361 | 0.830774 | Bmp4/Frm   |
| GO_BP_m2GO:001077positive re2/470   | 169/23843 | 0.848908 | 0.887361 | 0.830774 | Rab11a/Ss  |
| GO_BP_m2GO:004881dendrite m2/470    | 169/23843 | 0.848908 | 0.887361 | 0.830774 | Cit/Ss181  |
| GO_BP_m2GO:00072Cpositive re4/470   | 302/23843 | 0.848942 | 0.887361 | 0.830774 | Bmp4/Chd   |
| GO_BP_m2GO:00432Eregulation 1/470   | 95/23843  | 0.849704 | 0.887361 | 0.830774 | Ptk2b      |
| GO_BP_m2GO:00451Emeiotic chr1/470   | 95/23843  | 0.849704 | 0.887361 | 0.830774 | Espl1      |
| GO_BP_m2GO:200124negative re1/470   | 95/23843  | 0.849704 | 0.887361 | 0.830774 | Pink1      |
| GO_BP_m2GO:00508E cognition 4/470   | 303/23843 | 0.850725 | 0.887361 | 0.830774 | Bace1/Chd  |
| GO_BP_m2GO:000961response tr2/470   | 170/23843 | 0.851225 | 0.887361 | 0.830774 | Jund/Mir7E |
| GO_BP_m2GO:00508Eregulation 2/470   | 170/23843 | 0.851225 | 0.887361 | 0.830774 | Ptpm/Shc   |
| GO_BP_m2GO:009874cell-cell ad2/470  | 170/23843 | 0.851225 | 0.887361 | 0.830774 | Ptpm/Sele  |
| GO_BP_m2GO:000664triglyceride1/470  | 96/23843  | 0.852678 | 0.887361 | 0.830774 | Acsl4      |
| GO_BP_m2GO:000704cell-cell jur1/470 | 96/23843  | 0.852678 | 0.887361 | 0.830774 | Ect2       |
| GO_BP_m2GO:00083Cassociative 1/470  | 96/23843  | 0.852678 | 0.887361 | 0.830774 | Grm7       |
| GO_BP_m2GO:00300Econtractile 1/470  | 96/23843  | 0.852678 | 0.887361 | 0.830774 | Ptk2b      |
| GO_BP_m2GO:003031flagellated 1/470  | 96/23843  | 0.852678 | 0.887361 | 0.830774 | Ropn1l     |
| GO_BP_m2GO:00421Cpositive re1/470   | 96/23843  | 0.852678 | 0.887361 | 0.830774 | Il12rb1    |
| GO_BP_m2GO:004314stress fiber 1/470 | 96/23843  | 0.852678 | 0.887361 | 0.830774 | Ptk2b      |
| GO_BP_m2GO:00456Epositive re1/470   | 96/23843  | 0.852678 | 0.887361 | 0.830774 | Id2        |
| GO_BP_m2GO:005077positive re1/470   | 96/23843  | 0.852678 | 0.887361 | 0.830774 | Rab11a     |

|                                    |           |          |          |          |             |
|------------------------------------|-----------|----------|----------|----------|-------------|
| GO_BP_m2GO:006099kidney mor1/470   | 96/23843  | 0.852678 | 0.887361 | 0.830774 | Bmp4        |
| GO_BP_m2GO:007209nephron tu1/470   | 96/23843  | 0.852678 | 0.887361 | 0.830774 | Bmp4        |
| GO_BP_m2GO:003515regulation 2/470  | 171/23843 | 0.853509 | 0.887785 | 0.83117  | Ptpm/Shc:   |
| GO_BP_m2GO:004632regulation 2/470  | 171/23843 | 0.853509 | 0.887785 | 0.83117  | Ptk2b/Sfrp: |
| GO_BP_m2GO:000182blastocyst c1/470 | 98/23843  | 0.858452 | 0.892263 | 0.835363 | Lats2       |
| GO_BP_m2GO:004215lipoprotein1/470  | 98/23843  | 0.858452 | 0.892263 | 0.835363 | Pigm        |
| GO_BP_m2GO:004231vasoconstr1/470   | 98/23843  | 0.858452 | 0.892263 | 0.835363 | Shc1        |
| GO_BP_m2GO:00068Cxenobiotic 1/470  | 99/23843  | 0.861254 | 0.89451  | 0.837467 | Cyp2g1      |
| GO_BP_m2GO:002151spinal cord1/470  | 99/23843  | 0.861254 | 0.89451  | 0.837467 | Ift122      |
| GO_BP_m2GO:004213neurotrans1/470   | 99/23843  | 0.861254 | 0.89451  | 0.837467 | Ptk2b       |
| GO_BP_m2GO:000718adenylate c1/470  | 100/23843 | 0.864    | 0.896284 | 0.839128 | Adgrg6      |
| GO_BP_m2GO:004346regulation 1/470  | 100/23843 | 0.864    | 0.896284 | 0.839128 | Pink1       |
| GO_BP_m2GO:009772sperm mot1/470    | 100/23843 | 0.864    | 0.896284 | 0.839128 | Ropn1l      |
| GO_BP_m2GO:19000Cpositive re1/470  | 100/23843 | 0.864    | 0.896284 | 0.839128 | Ss181       |
| GO_BP_m2GO:199082response tr4/470  | 311/23843 | 0.86436  | 0.896284 | 0.839128 | Gtf2h1/Kdr  |
| GO_BP_m2GO:199083cellular res1/470 | 311/23843 | 0.86436  | 0.896284 | 0.839128 | Gtf2h1/Kdr  |
| GO_BP_m2GO:200123positive re2/470  | 176/23843 | 0.864457 | 0.896284 | 0.839128 | Rack1/Pink  |
| GO_BP_m2GO:004586positive re4/470  | 312/23843 | 0.865987 | 0.897493 | 0.84026  | Rack1/Ptk2  |
| GO_BP_m2GO:000715homophilic1/470   | 101/23843 | 0.866692 | 0.897493 | 0.84026  | Ptpm        |
| GO_BP_m2GO:004544endothelial1/470  | 101/23843 | 0.866692 | 0.897493 | 0.84026  | Bmp4        |
| GO_BP_m2GO:004562positive re1/470  | 101/23843 | 0.866692 | 0.897493 | 0.84026  | Zbtb1       |
| GO_BP_m2GO:006041heart grow1/470   | 101/23843 | 0.866692 | 0.897493 | 0.84026  | Prkar1a     |
| GO_BP_m2GO:000916purine ribo3/470  | 247/23843 | 0.8678   | 0.898196 | 0.840918 | Adsl/Pfkfb2 |
| GO_BP_m2GO:00092Cpurine ribo3/470  | 247/23843 | 0.8678   | 0.898196 | 0.840918 | Pfkfb2/Pink |
| GO_BP_m2GO:000165ureteric bu1/470  | 102/23843 | 0.869331 | 0.898452 | 0.841158 | Bmp4        |
| GO_BP_m2GO:00027Cpositive re1/470  | 102/23843 | 0.869331 | 0.898452 | 0.841158 | Zbtb1       |
| GO_BP_m2GO:006132renal tubul1/470  | 102/23843 | 0.869331 | 0.898452 | 0.841158 | Bmp4        |
| GO_BP_m2GO:007216mesoneph1/470     | 102/23843 | 0.869331 | 0.898452 | 0.841158 | Bmp4        |
| GO_BP_m2GO:007216mesoneph1/470     | 102/23843 | 0.869331 | 0.898452 | 0.841158 | Bmp4        |
| GO_BP_m2GO:19030Corganelle c1/470  | 102/23843 | 0.869331 | 0.898452 | 0.841158 | Pink1       |
| GO_BP_m2GO:000912purine nucl3/470  | 248/23843 | 0.86957  | 0.898477 | 0.841181 | Adsl/Pfkfb2 |
| GO_BP_m2GO:00432Cresponse tr2/470  | 179/23843 | 0.870661 | 0.89894  | 0.841615 | Mir346/Mir  |
| GO_BP_m2GO:005077regulation 2/470  | 179/23843 | 0.870661 | 0.89894  | 0.841615 | Cit/Ss181   |
| GO_BP_m2GO:005087positive re2/470  | 179/23843 | 0.870661 | 0.89894  | 0.841615 | Il12rb1/Zbt |
| GO_BP_m2GO:000661protein tar1/470  | 103/23843 | 0.871918 | 0.899132 | 0.841795 | Sec63       |
| GO_BP_m2GO:001407response tr1/470  | 103/23843 | 0.871918 | 0.899132 | 0.841795 | Jund        |
| GO_BP_m2GO:001895phenol-co1/470    | 103/23843 | 0.871918 | 0.899132 | 0.841795 | Crym        |
| GO_BP_m2GO:003264regulation 1/470  | 103/23843 | 0.871918 | 0.899132 | 0.841795 | Il12rb1     |
| GO_BP_m2GO:200011negative re1/470  | 103/23843 | 0.871918 | 0.899132 | 0.841795 | Sfrp2       |
| GO_BP_m2GO:003286cellular res2/470 | 180/23843 | 0.872671 | 0.899687 | 0.842314 | Foxo4/Shc:  |
| GO_BP_m2GO:000244lymphocytr5/470   | 381/23843 | 0.873246 | 0.900059 | 0.842663 | Ighv1-23/I  |
| GO_BP_m2GO:001973antimicrob1/470   | 104/23843 | 0.874454 | 0.900732 | 0.843292 | Rnase6      |
| GO_BP_m2GO:009775negative re1/470  | 104/23843 | 0.874454 | 0.900732 | 0.843292 | Shc1        |
| GO_BP_m2GO:000916ribonucleo:3/470  | 251/23843 | 0.874757 | 0.900732 | 0.843292 | Adsl/Pfkfb2 |
| GO_BP_m2GO:001046negative re3/470  | 251/23843 | 0.874757 | 0.900732 | 0.843292 | Ambp/Serf   |
| GO_BP_m2GO:000182mesoneph1/470     | 105/23843 | 0.87694  | 0.902536 | 0.844981 | Bmp4        |
| GO_BP_m2GO:001923response tr1/470  | 105/23843 | 0.87694  | 0.902536 | 0.844981 | Vmn1r215    |
| GO_BP_m2GO:001606immunoglc3/470    | 253/23843 | 0.878113 | 0.903522 | 0.845905 | Ighv1-23/I  |

|                                     |           |          |          |          |             |
|-------------------------------------|-----------|----------|----------|----------|-------------|
| GO_BP_m2GO:000268negative re6/470   | 448/23843 | 0.878493 | 0.903691 | 0.846062 | Bmp4/Id2/   |
| GO_BP_m2GO:005109regulation 5/470   | 385/23843 | 0.878815 | 0.903801 | 0.846166 | Hr/Id2/Mav  |
| GO_BP_m2GO:19037Cregulation 5/470   | 386/23843 | 0.880175 | 0.904978 | 0.847267 | Bmp4/Id2/   |
| GO_BP_m2GO:001972B cell medi3/470   | 255/23843 | 0.88139  | 0.906005 | 0.848229 | Ighv1-23/I  |
| GO_BP_m2GO:004324regulation 1/470   | 107/23843 | 0.881765 | 0.906168 | 0.848382 | Twf1        |
| GO_BP_m2GO:003432cell junctio2/470  | 185/23843 | 0.882293 | 0.906268 | 0.848475 | Ect2/Ptk2b  |
| GO_BP_m2GO:007156cellular res2/470  | 185/23843 | 0.882293 | 0.906268 | 0.848475 | Bambi/Tgft  |
| GO_BP_m2GO:005125positive re5/470   | 388/23843 | 0.882855 | 0.906548 | 0.848737 | Ighv1-23/I  |
| GO_BP_m2GO:000914purine nuc3/470    | 256/23843 | 0.882998 | 0.906548 | 0.848737 | Pfkfb2/Pink |
| GO_BP_m2GO:00720Cnephron ep1/470    | 108/23843 | 0.884106 | 0.907049 | 0.849207 | Bmp4        |
| GO_BP_m2GO:000718adenylate c2/470   | 186/23843 | 0.884135 | 0.907049 | 0.849207 | Adgrg6/Gr   |
| GO_BP_m2GO:00507Cregulation 2/470   | 186/23843 | 0.884135 | 0.907049 | 0.849207 | Mavs/Syt1   |
| GO_BP_m2GO:007155response tr2/470   | 187/23843 | 0.885951 | 0.90869  | 0.850743 | Bambi/Tgft  |
| GO_BP_m2GO:000725JNK cascad2/470    | 188/23843 | 0.88774  | 0.910302 | 0.852252 | Ptk2b/Sfrp  |
| GO_BP_m2GO:00063Cdouble-str2/470    | 189/23843 | 0.889503 | 0.911887 | 0.853736 | H2afx/Recc  |
| GO_BP_m2GO:000912nucleoside 3/470   | 261/23843 | 0.890753 | 0.912828 | 0.854617 | Adsl/Pfkfb2 |
| GO_BP_m2GO:000863intrinsic ap1/470  | 111/23843 | 0.890855 | 0.912828 | 0.854617 | Casp16-ps   |
| GO_BP_m2GO:000225T cell activ1/470  | 112/23843 | 0.893017 | 0.913927 | 0.855646 | lfna4       |
| GO_BP_m2GO:000315endotheliu1/470    | 112/23843 | 0.893017 | 0.913927 | 0.855646 | Bmp4        |
| GO_BP_m2GO:000758body fluid :1/470  | 112/23843 | 0.893017 | 0.913927 | 0.855646 | Prl8a2      |
| GO_BP_m2GO:004247odontogen1/470     | 112/23843 | 0.893017 | 0.913927 | 0.855646 | Bmp4        |
| GO_BP_m2GO:005082defense re1/470    | 112/23843 | 0.893017 | 0.913927 | 0.855646 | Rnase6      |
| GO_BP_m2GO:000716negative re3/470   | 263/23843 | 0.893724 | 0.914427 | 0.856114 | Bmp4/Prka   |
| GO_BP_m2GO:000724I-kappaB k2/470    | 192/23843 | 0.89464  | 0.915141 | 0.856782 | Pink1/Tme   |
| GO_BP_m2GO:00311Cmicrotubul1/470    | 113/23843 | 0.895136 | 0.915245 | 0.85688  | Dyrk1a      |
| GO_BP_m2GO:001993second-m4/470      | 332/23843 | 0.895178 | 0.915245 | 0.85688  | Adgrg6/Pd   |
| GO_BP_m2GO:000307regulation 1/470   | 114/23843 | 0.897213 | 0.916656 | 0.858201 | Rasl10b     |
| GO_BP_m2GO:001081positive re1/470   | 114/23843 | 0.897213 | 0.916656 | 0.858201 | Ptk2b       |
| GO_BP_m2GO:001657protein del1/470   | 114/23843 | 0.897213 | 0.916656 | 0.858201 | Usp17le     |
| GO_BP_m2GO:000663acylglycerc1/470   | 115/23843 | 0.899249 | 0.918289 | 0.859729 | Acsl4       |
| GO_BP_m2GO:00326Cinterferon-1/470   | 115/23843 | 0.899249 | 0.918289 | 0.859729 | Il12rb1     |
| GO_BP_m2GO:000821regulation 2/470   | 196/23843 | 0.901143 | 0.919431 | 0.860799 | Id2/Rasl10  |
| GO_BP_m2GO:001082regulation 2/470   | 196/23843 | 0.901143 | 0.919431 | 0.860799 | Pink1/Rac2  |
| GO_BP_m2GO:000827regulation 1/470   | 116/23843 | 0.901244 | 0.919431 | 0.860799 | Cry1        |
| GO_BP_m2GO:00421CB cell prolif1/470 | 116/23843 | 0.901244 | 0.919431 | 0.860799 | lfna4       |
| GO_BP_m2GO:004206wound hea4/470     | 337/23843 | 0.901543 | 0.919513 | 0.860875 | Pdcd10/Pl   |
| GO_BP_m2GO:005148regulation 4/470   | 338/23843 | 0.902774 | 0.919638 | 0.860993 | Bmp4/Chd    |
| GO_BP_m2GO:000663neutral lipic1/470 | 117/23843 | 0.903201 | 0.919638 | 0.860993 | Acsl4       |
| GO_BP_m2GO:000675ATP biosyn1/470    | 117/23843 | 0.903201 | 0.919638 | 0.860993 | Pfkfb2      |
| GO_BP_m2GO:001605carbohydr1/470     | 117/23843 | 0.903201 | 0.919638 | 0.860993 | Pfkfb2      |
| GO_BP_m2GO:004328positive re1/470   | 117/23843 | 0.903201 | 0.919638 | 0.860993 | Rack1       |
| GO_BP_m2GO:006099dendritic s1/470   | 117/23843 | 0.903201 | 0.919638 | 0.860993 | Acsl4       |
| GO_BP_m2GO:190037regulation 1/470   | 117/23843 | 0.903201 | 0.919638 | 0.860993 | Ptk2b       |
| GO_BP_m2GO:004508positive re2/470   | 198/23843 | 0.904253 | 0.920264 | 0.861578 | Mavs/S100   |
| GO_BP_m2GO:19037Cpositive re2/470   | 198/23843 | 0.904253 | 0.920264 | 0.861578 | Id2/Zbtb1   |
| GO_BP_m2GO:00308Cregulation 1/470   | 118/23843 | 0.905118 | 0.920697 | 0.861984 | Ptk2b       |
| GO_BP_m2GO:004646membrane1/470      | 118/23843 | 0.905118 | 0.920697 | 0.861984 | Pigm        |
| GO_BP_m2GO:000761learning or3/470   | 272/23843 | 0.906216 | 0.92159  | 0.86282  | Bace1/Grm   |

|                   |               |       |           |          |          |          |             |
|-------------------|---------------|-------|-----------|----------|----------|----------|-------------|
| GO_BP_m2GO:005192 | positive re   | 1/470 | 119/23843 | 0.906998 | 0.922162 | 0.863356 | Bmp4        |
| GO_BP_m2GO:001095 | negative re   | 2/470 | 201/23843 | 0.908747 | 0.923717 | 0.864812 | Serpina1b/  |
| GO_BP_m2GO:005111 | regulation    | 1/470 | 122/23843 | 0.912417 | 0.927222 | 0.868093 | Id2         |
| GO_BP_m2GO:004328 | regulation    | 2/470 | 204/23843 | 0.913044 | 0.927635 | 0.868479 | Rack1/Sfrp  |
| GO_BP_m2GO:001635 | dendrite de   | 3/470 | 280/23843 | 0.916189 | 0.930605 | 0.87126  | Acsl4/Cit/S |
| GO_BP_m2GO:000271 | regulation    | 1/470 | 126/23843 | 0.919155 | 0.933166 | 0.873658 | Nr4a3       |
| GO_BP_m2GO:000705 | mitotic cell  | 1/470 | 126/23843 | 0.919155 | 0.933166 | 0.873658 | Foxo4       |
| GO_BP_m2GO:005085 | antigen rec   | 3/470 | 283/23843 | 0.919673 | 0.933354 | 0.873834 | Ighv1-23/I  |
| GO_BP_m2GO:000716 | establishm    | 2/470 | 209/23843 | 0.919785 | 0.933354 | 0.873834 | Ooep/Ptk2   |
| GO_BP_m2GO:004633 | positive re   | 1/470 | 127/23843 | 0.920757 | 0.933937 | 0.87438  | Ptk2b       |
| GO_BP_m2GO:003211 | positive re   | 3/470 | 284/23843 | 0.920805 | 0.933937 | 0.87438  | Ptk2b/Rac2  |
| GO_BP_m2GO:000921 | purine ribo   | 1/470 | 128/23843 | 0.922327 | 0.934818 | 0.875205 | Pfkfb2      |
| GO_BP_m2GO:004215 | lipoprotein   | 1/470 | 128/23843 | 0.922327 | 0.934818 | 0.875205 | Pigm        |
| GO_BP_m2GO:005066 | cytokine se   | 2/470 | 211/23843 | 0.922342 | 0.934818 | 0.875205 | Mavs/Syt1   |
| GO_BP_m2GO:000914 | purine nuc    | 1/470 | 129/23843 | 0.923867 | 0.935685 | 0.876017 | Pfkfb2      |
| GO_BP_m2GO:005083 | defense re    | 1/470 | 129/23843 | 0.923867 | 0.935685 | 0.876017 | Rnase6      |
| GO_BP_m2GO:200105 | positive re   | 1/470 | 129/23843 | 0.923867 | 0.935685 | 0.876017 | Rack1       |
| GO_BP_m2GO:003001 | establishm    | 1/470 | 130/23843 | 0.925376 | 0.936988 | 0.877236 | Ptk2b       |
| GO_BP_m2GO:000252 | acute infla   | 1/470 | 131/23843 | 0.926855 | 0.938259 | 0.878426 | Serpina1b   |
| GO_BP_m2GO:006104 | regulation    | 1/470 | 132/23843 | 0.928305 | 0.9395   | 0.879588 | Plau        |
| GO_BP_m2GO:000941 | response tr   | 2/470 | 217/23843 | 0.929559 | 0.940031 | 0.880085 | Bmp4/Cyp    |
| GO_BP_m2GO:000979 | specificatio  | 1/470 | 133/23843 | 0.929726 | 0.940031 | 0.880085 | Bmp4        |
| GO_BP_m2GO:001923 | sensory pe    | 1/470 | 133/23843 | 0.929726 | 0.940031 | 0.880085 | Penk        |
| GO_BP_m2GO:005071 | positive re   | 1/470 | 133/23843 | 0.929726 | 0.940031 | 0.880085 | Mavs        |
| GO_BP_m2GO:007064 | protein mo    | 1/470 | 135/23843 | 0.932484 | 0.942593 | 0.882484 | Usp17le     |
| GO_BP_m2GO:001585 | organic hydr  | 2/470 | 221/23843 | 0.934014 | 0.943685 | 0.883506 | Acat2/Pink  |
| GO_BP_m2GO:004603 | ATP metab     | 2/470 | 221/23843 | 0.934014 | 0.943685 | 0.883506 | Pfkfb2/Pink |
| GO_BP_m2GO:005067 | positive re   | 1/470 | 137/23843 | 0.935135 | 0.94459  | 0.884353 | Il12rb1     |
| GO_BP_m2GO:006056 | epithelial ti | 4/470 | 371/23843 | 0.93646  | 0.945701 | 0.885394 | Bmp4/Fkfb   |
| GO_BP_m2GO:001657 | histone ac    | 1/470 | 139/23843 | 0.937681 | 0.946478 | 0.886122 | Auts2       |
| GO_BP_m2GO:003294 | positive re   | 1/470 | 139/23843 | 0.937681 | 0.946478 | 0.886122 | Il12rb1     |
| GO_BP_m2GO:000206 | columnar/c    | 1/470 | 140/23843 | 0.938917 | 0.94727  | 0.886863 | Bmp4        |
| GO_BP_m2GO:005189 | regulation    | 1/470 | 140/23843 | 0.938917 | 0.94727  | 0.886863 | Rack1       |
| GO_BP_m2GO:004213 | neurotrans    | 1/470 | 141/23843 | 0.940128 | 0.948036 | 0.88758  | Ptk2b       |
| GO_BP_m2GO:007207 | kidney epit   | 1/470 | 141/23843 | 0.940128 | 0.948036 | 0.88758  | Bmp4        |
| GO_BP_m2GO:004578 | positive re   | 4/470 | 379/23843 | 0.942844 | 0.950547 | 0.88993  | Il12rb1/Nr  |
| GO_BP_m2GO:001839 | internal pe   | 1/470 | 144/23843 | 0.94362  | 0.9511   | 0.890448 | Auts2       |
| GO_BP_m2GO:007066 | positive re   | 1/470 | 145/23843 | 0.944738 | 0.951998 | 0.891289 | Il12rb1     |
| GO_BP_m2GO:200011 | regulation    | 2/470 | 234/23843 | 0.94672  | 0.953767 | 0.892945 | Rack1/Sfrp  |
| GO_BP_m2GO:003134 | positive re   | 3/470 | 312/23843 | 0.947135 | 0.953956 | 0.893122 | Mavs/Penk   |
| GO_BP_m2GO:000647 | internal pr   | 1/470 | 149/23843 | 0.948994 | 0.955598 | 0.89466  | Auts2       |
| GO_BP_m2GO:000271 | regulation    | 1/470 | 150/23843 | 0.950005 | 0.956387 | 0.895399 | Zbtb1       |
| GO_BP_m2GO:000631 | DNA recon     | 2/470 | 239/23843 | 0.950958 | 0.957116 | 0.896081 | H2afx/Recc  |
| GO_BP_m2GO:004508 | regulation    | 2/470 | 241/23843 | 0.952561 | 0.958404 | 0.897286 | Mavs/S100   |
| GO_BP_m2GO:001839 | peptidyl-ly   | 1/470 | 153/23843 | 0.952922 | 0.958404 | 0.897286 | Auts2       |
| GO_BP_m2GO:004593 | positive re   | 1/470 | 153/23843 | 0.952922 | 0.958404 | 0.897286 | Rab11a      |
| GO_BP_m2GO:000741 | synapse as    | 1/470 | 158/23843 | 0.957411 | 0.962457 | 0.901081 | Agrn        |
| GO_BP_m2GO:003582 | modificatic   | 1/470 | 158/23843 | 0.957411 | 0.962457 | 0.901081 | Ppib        |

|                                |        |           |          |          |          |             |
|--------------------------------|--------|-----------|----------|----------|----------|-------------|
| GO_BP_m2GO:000761learning      | 1/470  | 161/23843 | 0.959896 | 0.964725 | 0.903204 | Grm7        |
| GO_BP_m2GO:005254regulation    | 4/470  | 407/23843 | 0.960849 | 0.965451 | 0.903884 | Ambp/Racl   |
| GO_BP_m2GO:190303regulation    | 1/470  | 165/23843 | 0.962987 | 0.967367 | 0.905678 | Plau        |
| GO_BP_m2GO:00508Csynapse or    | 3/470  | 337/23843 | 0.963524 | 0.967444 | 0.90575  | Agrn/Lmx1   |
| GO_BP_m2GO:005087regulation    | 3/470  | 337/23843 | 0.963524 | 0.967444 | 0.90575  | Plau/Prl8a2 |
| GO_BP_m2GO:004349protein kin.  | 1/470  | 168/23843 | 0.965147 | 0.968842 | 0.907059 | Rack1       |
| GO_BP_m2GO:005254regulation    | 3/470  | 349/23843 | 0.969569 | 0.973048 | 0.910997 | Rack1/Serp  |
| GO_BP_m2GO:000647protein ac    | 1/470  | 179/23843 | 0.972047 | 0.975301 | 0.913106 | Auts2       |
| GO_BP_m2GO:000687cellular calc | 4/470  | 433/23843 | 0.972721 | 0.975744 | 0.913521 | Bmp4/Chd    |
| GO_BP_m2GO:00508Cregulation    | 1/470  | 182/23843 | 0.97368  | 0.976473 | 0.914203 | Agrn        |
| GO_BP_m2GO:005507calcium ion   | 4/470  | 448/23843 | 0.977943 | 0.980513 | 0.917986 | Bmp4/Chd    |
| GO_BP_m2GO:00508Cregulation    | 1/470  | 194/23843 | 0.979313 | 0.981653 | 0.919053 | Agrn        |
| GO_BP_m2GO:00725Ccellular div. | 4/470  | 459/23843 | 0.981158 | 0.983267 | 0.920564 | Bmp4/Chd    |
| GO_BP_m2GO:000244production    | 2/470  | 300/23843 | 0.982565 | 0.984442 | 0.921664 | Galnt2/Nr4  |
| GO_BP_m2GO:00725Cdivalent inc  | 4/470  | 482/23843 | 0.986508 | 0.988157 | 0.925142 | Bmp4/Chd    |
| GO_BP_m2GO:000237immunogl      | 1/470  | 222/23843 | 0.988212 | 0.989391 | 0.926297 | Galnt2      |
| GO_BP_m2GO:004354protein acy   | 1/470  | 222/23843 | 0.988212 | 0.989391 | 0.926297 | Auts2       |
| GO_BP_m2GO:00509Cdetection c   | 1/470  | 308/23843 | 0.997913 | 0.99875  | 0.93506  | Olfr282     |
| GO_BP_m2GO:00321Cnegative re   | 1/470  | 311/23843 | 0.998036 | 0.99875  | 0.93506  | Plau        |
| GO_BP_m2GO:00095Cdetection c   | 1/470  | 337/23843 | 0.998838 | 0.999314 | 0.935588 | Olfr282     |
| GO_BP_m2GO:00509Cdetection c   | 1/470  | 377/23843 | 0.999482 | 0.999721 | 0.935968 | Olfr282     |
| GO_BP_m2GO:00516Cdetection c   | 1/470  | 474/23843 | 0.999928 | 0.999928 | 0.936162 | Olfr282     |
| GO_BP_m3GO:004654saliva secre  | 5/539  | 15/23843  | 1.44E-05 | 0.06196  | 0.058464 | Aqp5/Neur   |
| GO_BP_m3GO:00508Cpositive re   | 20/539 | 326/23843 | 5.96E-05 | 0.0971   | 0.09162  | Bcl2l1/Calk |
| GO_BP_m3GO:00604Enegative re   | 5/539  | 20/23843  | 6.78E-05 | 0.0971   | 0.09162  | Neurog1/C   |
| GO_BP_m3GO:009707ductus arte   | 3/539  | 6/23843   | 0.000218 | 0.164862 | 0.155559 | Foxf1/Hpg   |
| GO_BP_m3GO:00602Elong-term     | 15/539 | 230/23843 | 0.000254 | 0.164862 | 0.155559 | Calb2/Gip/  |
| GO_BP_m3GO:00481Eregulation    | 19/539 | 342/23843 | 0.000322 | 0.164862 | 0.155559 | Bcl2l1/Calk |
| GO_BP_m3GO:190024positive re   | 3/539  | 7/23843   | 0.000376 | 0.164862 | 0.155559 | Bcl2l1/Lrrk |
| GO_BP_m3GO:004001negative re   | 4/539  | 16/23843  | 0.000379 | 0.164862 | 0.155559 | Atxn2/Ptch  |
| GO_BP_m3GO:007162masticator    | 2/539  | 2/23843   | 0.00051  | 0.164862 | 0.155559 | Neurog1/T   |
| GO_BP_m3GO:00985Elearned vo    | 2/539  | 2/23843   | 0.00051  | 0.164862 | 0.155559 | Neurog1/T   |
| GO_BP_m3GO:190574negative re   | 2/539  | 2/23843   | 0.00051  | 0.164862 | 0.155559 | Neurog1/T   |
| GO_BP_m3GO:190574hard palate   | 2/539  | 2/23843   | 0.00051  | 0.164862 | 0.155559 | Neurog1/T   |
| GO_BP_m3GO:003564explorator    | 5/539  | 30/23843  | 0.000517 | 0.164862 | 0.155559 | Chrna4/Gip  |
| GO_BP_m3GO:00075Edigestion     | 10/539 | 125/23843 | 0.000558 | 0.164862 | 0.155559 | Adm2/Aqp    |
| GO_BP_m3GO:00604Enegative re   | 3/539  | 8/23843   | 0.000591 | 0.164862 | 0.155559 | Oxt/Tff2/U  |
| GO_BP_m3GO:00109Cresponse tr   | 4/539  | 18/23843  | 0.000614 | 0.164862 | 0.155559 | Neurog1/T   |
| GO_BP_m3GO:003294secretion b   | 6/539  | 49/23843  | 0.000796 | 0.189865 | 0.179151 | Aqp5/Neur   |
| GO_BP_m3GO:00440Eregulation    | 6/539  | 49/23843  | 0.000796 | 0.189865 | 0.179151 | Neurog1/C   |
| GO_BP_m3GO:004687regulation    | 3/539  | 9/23843   | 0.000872 | 0.197068 | 0.185948 | Neurog1/T   |
| GO_BP_m3GO:200082regulation    | 5/539  | 37/23843  | 0.00139  | 0.263359 | 0.248498 | Bmp2/Foxc   |
| GO_BP_m3GO:00073Ethorax and    | 2/539  | 3/23843   | 0.001507 | 0.263359 | 0.248498 | Neurog1/T   |
| GO_BP_m3GO:00149Cmyotube d     | 2/539  | 3/23843   | 0.001507 | 0.263359 | 0.248498 | Myod1/My    |
| GO_BP_m3GO:00617Csecretory g   | 2/539  | 3/23843   | 0.001507 | 0.263359 | 0.248498 | Ptprn/Syt4  |
| GO_BP_m3GO:00508Cregulation    | 12/539 | 194/23843 | 0.001611 | 0.263359 | 0.248498 | 2610042L0   |
| GO_BP_m3GO:00970Csynaptic ve   | 3/539  | 11/23843  | 0.001656 | 0.263359 | 0.248498 | Bcl2l1/Nlgr |
| GO_BP_m3GO:190024regulation    | 3/539  | 11/23843  | 0.001656 | 0.263359 | 0.248498 | Bcl2l1/Lrrk |

|                   |               |        |           |          |          |          |             |
|-------------------|---------------|--------|-----------|----------|----------|----------|-------------|
| GO_BP_m3GO:190342 | positive re   | 3/539  | 11/23843  | 0.001656 | 0.263359 | 0.248498 | Bcl2l1/Lrrk |
| GO_BP_m3GO:006007 | excitatory    | 7/539  | 78/23843  | 0.00192  | 0.289539 | 0.2732   | Chrna4/Cu   |
| GO_BP_m3GO:002260 | digestive sy  | 8/539  | 100/23843 | 0.001955 | 0.289539 | 0.2732   | Aqp5/Neu    |
| GO_BP_m3GO:000341 | chondrocyt    | 3/539  | 12/23843  | 0.002171 | 0.297797 | 0.280992 | Axin2/Col2  |
| GO_BP_m3GO:006045 | regulation    | 3/539  | 12/23843  | 0.002171 | 0.297797 | 0.280992 | Oxt/Tff2/U  |
| GO_BP_m3GO:001400 | glial cell pr | 5/539  | 41/23843  | 0.002219 | 0.297797 | 0.280992 | Areg/Hes1   |
| GO_BP_m3GO:007007 | histone lysi  | 4/539  | 26/23843  | 0.002601 | 0.338486 | 0.319385 | Hsf4/Kdm4   |
| GO_BP_m3GO:002170 | developme     | 15/539 | 291/23843 | 0.002743 | 0.338978 | 0.319849 | Bmp2/Cats   |
| GO_BP_m3GO:003316 | histone H3    | 3/539  | 13/23843  | 0.002775 | 0.338978 | 0.319849 | Hsf4/Kdm4   |
| GO_BP_m3GO:002165 | vestibulocc   | 2/539  | 4/23843   | 0.00297  | 0.338978 | 0.319849 | Neurog1/T   |
| GO_BP_m3GO:001657 | histone de    | 4/539  | 27/23843  | 0.002999 | 0.338978 | 0.319849 | Hsf4/Kdm4   |
| GO_BP_m3GO:200030 | regulation    | 4/539  | 27/23843  | 0.002999 | 0.338978 | 0.319849 | Bcl2l1/Lrrk |
| GO_BP_m3GO:004846 | cell matura   | 11/539 | 184/23843 | 0.003227 | 0.355362 | 0.335308 | Catsper4/C  |
| GO_BP_m3GO:190280 | regulation    | 4/539  | 28/23843  | 0.003437 | 0.363761 | 0.343233 | Bcl2l1/Lrrk |
| GO_BP_m3GO:002198 | adenohypc     | 3/539  | 14/23843  | 0.003472 | 0.363761 | 0.343233 | Bmp2/Ghrl   |
| GO_BP_m3GO:009881 | modulator     | 5/539  | 46/23843  | 0.003701 | 0.378451 | 0.357095 | Chrna4/Cu   |
| GO_BP_m3GO:000648 | protein de    | 4/539  | 29/23843  | 0.003917 | 0.379624 | 0.358201 | Hsf4/Kdm4   |
| GO_BP_m3GO:000821 | protein de    | 4/539  | 29/23843  | 0.003917 | 0.379624 | 0.358201 | Hsf4/Kdm4   |
| GO_BP_m3GO:004001 | regulation    | 7/539  | 89/23843  | 0.004053 | 0.379624 | 0.358201 | Atxn2/Gdff  |
| GO_BP_m3GO:007213 | mesenchyr     | 5/539  | 47/23843  | 0.004066 | 0.379624 | 0.358201 | Bmp2/Foxc   |
| GO_BP_m3GO:000735 | zygotic det   | 2/539  | 5/23843   | 0.004875 | 0.390787 | 0.368735 | Neurog1/T   |
| GO_BP_m3GO:001095 | free ubiqui   | 2/539  | 5/23843   | 0.004875 | 0.390787 | 0.368735 | Trim6/Ube   |
| GO_BP_m3GO:190107 | negative re   | 2/539  | 5/23843   | 0.004875 | 0.390787 | 0.368735 | Neurog1/T   |
| GO_BP_m3GO:190280 | positive re   | 2/539  | 5/23843   | 0.004875 | 0.390787 | 0.368735 | Bcl2l1/Nlgr |
| GO_BP_m3GO:200030 | positive re   | 2/539  | 5/23843   | 0.004875 | 0.390787 | 0.368735 | Bcl2l1/Nlgr |
| GO_BP_m3GO:005105 | negative re   | 21/539 | 498/23843 | 0.004973 | 0.390787 | 0.368735 | Abr/Atxn2/  |
| GO_BP_m3GO:000995 | anterior/pc   | 12/539 | 223/23843 | 0.005009 | 0.390787 | 0.368735 | Axin2/Bmp   |
| GO_BP_m3GO:004884 | artery mor    | 6/539  | 70/23843  | 0.005014 | 0.390787 | 0.368735 | Foxc2/Foxf  |
| GO_BP_m3GO:004275 | drinking b    | 3/539  | 16/23843  | 0.005166 | 0.390787 | 0.368735 | Oxt/Tacr1/  |
| GO_BP_m3GO:009709 | craniofacia   | 3/539  | 16/23843  | 0.005166 | 0.390787 | 0.368735 | Neurog1/T   |
| GO_BP_m3GO:001082 | regulation    | 11/539 | 196/23843 | 0.005186 | 0.390787 | 0.368735 | 2610042L0   |
| GO_BP_m3GO:005196 | regulation    | 7/539  | 94/23843  | 0.005471 | 0.405149 | 0.382287 | Amigo3/Cu   |
| GO_BP_m3GO:190353 | positive re   | 19/539 | 439/23843 | 0.005612 | 0.405154 | 0.382291 | Avp/Bcl2l1  |
| GO_BP_m3GO:004856 | embryonic     | 15/539 | 315/23843 | 0.005685 | 0.405154 | 0.382291 | Abr/Cryaa/  |
| GO_BP_m3GO:005170 | multi-orga    | 6/539  | 72/23843  | 0.005754 | 0.405154 | 0.382291 | Avp/Helt/N  |
| GO_BP_m3GO:005507 | sodium ion    | 5/539  | 52/23843  | 0.006284 | 0.435314 | 0.410749 | Avp/Oxt/S   |
| GO_BP_m3GO:004854 | digestive tr  | 5/539  | 53/23843  | 0.006812 | 0.445528 | 0.420386 | Foxf1/Ihh/I |
| GO_BP_m3GO:009956 | chemical sy   | 7/539  | 98/23843  | 0.00685  | 0.445528 | 0.420386 | Chrna4/Cu   |
| GO_BP_m3GO:002164 | vestibulocc   | 2/539  | 6/23843   | 0.007204 | 0.445528 | 0.420386 | Neurog1/T   |
| GO_BP_m3GO:003158 | activation    | 2/539  | 6/23843   | 0.007204 | 0.445528 | 0.420386 | Ccl5/Prkcz  |
| GO_BP_m3GO:004271 | sperm ejac    | 2/539  | 6/23843   | 0.007204 | 0.445528 | 0.420386 | Oxt/Tacr1   |
| GO_BP_m3GO:200080 | positive re   | 2/539  | 6/23843   | 0.007204 | 0.445528 | 0.420386 | Bcl2l1/Nlgr |
| GO_BP_m3GO:004817 | regulation    | 3/539  | 18/23843  | 0.00728  | 0.445528 | 0.420386 | Grik2/Syng  |
| GO_BP_m3GO:190342 | regulation    | 3/539  | 18/23843  | 0.00728  | 0.445528 | 0.420386 | Bcl2l1/Lrrk |
| GO_BP_m3GO:003526 | multicellul   | 11/539 | 206/23843 | 0.007452 | 0.445528 | 0.420386 | Atf5/Atxn2  |
| GO_BP_m3GO:005196 | positive re   | 6/539  | 76/23843  | 0.007469 | 0.445528 | 0.420386 | Amigo3/Cu   |
| GO_BP_m3GO:006007 | regulation    | 7/539  | 100/23843 | 0.007629 | 0.448833 | 0.423505 | Chrna4/Cu   |
| GO_BP_m3GO:000169 | gastric acic  | 3/539  | 19/23843  | 0.008501 | 0.45856  | 0.432683 | Oxt/Tff2/U  |



|                   |                             |           |          |         |          |              |
|-------------------|-----------------------------|-----------|----------|---------|----------|--------------|
| GO_BP_m3GO:004683 | carbohydrate 3/539          | 19/23843  | 0.008501 | 0.45856 | 0.432683 | Fuk/Hk1/Ip   |
| GO_BP_m3GO:003081 | positive regulation 4/539   | 36/23843  | 0.008581 | 0.45856 | 0.432683 | Avp/Ghrhr    |
| GO_BP_m3GO:005080 | regulation 10/539           | 182/23843 | 0.008662 | 0.45856 | 0.432683 | Amigo3/Ca    |
| GO_BP_m3GO:004855 | embryonic 3/539             | 20/23843  | 0.009836 | 0.45856 | 0.432683 | Foxf1/Ihh/1  |
| GO_BP_m3GO:004577 | negative regulation 5/539   | 58/23843  | 0.009926 | 0.45856 | 0.432683 | Adm2/Ier3.   |
| GO_BP_m3GO:004516 | cell fate commitment 13/539 | 274/23843 | 0.009928 | 0.45856 | 0.432683 | Bmp2/Cdo     |
| GO_BP_m3GO:001095 | ubiquitin mediated 2/539    | 7/23843   | 0.009935 | 0.45856 | 0.432683 | Trim6/Ube    |
| GO_BP_m3GO:009891 | retrograde 2/539            | 7/23843   | 0.009935 | 0.45856 | 0.432683 | Nlgn1/Syt4   |
| GO_BP_m3GO:190011 | negative regulation 2/539   | 7/23843   | 0.009935 | 0.45856 | 0.432683 | Kdm4b/Kd     |
| GO_BP_m3GO:004866 | neuron fate 6/539           | 81/23843  | 0.010095 | 0.45856 | 0.432683 | Epop/Hes1    |
| GO_BP_m3GO:001063 | negative regulation 16/539  | 369/23843 | 0.010334 | 0.45856 | 0.432683 | Avp/Bcl2l1.  |
| GO_BP_m3GO:004566 | negative regulation 5/539   | 59/23843  | 0.010649 | 0.45856 | 0.432683 | Areg/Axin2   |
| GO_BP_m3GO:006133 | establishment 3/539         | 21/23843  | 0.011285 | 0.45856 | 0.432683 | Crb3/Foxf1   |
| GO_BP_m3GO:003027 | regulation 11/539           | 220/23843 | 0.011839 | 0.45856 | 0.432683 | Areg/Axin2   |
| GO_BP_m3GO:190330 | negative regulation 3/539   | 22/23843  | 0.012852 | 0.45856 | 0.432683 | Abr/Foxf1/   |
| GO_BP_m3GO:004863 | regulation 9/539            | 165/23843 | 0.012981 | 0.45856 | 0.432683 | Bmp2/Cdo     |
| GO_BP_m3GO:002160 | cranial nerve 2/539         | 8/23843   | 0.013049 | 0.45856 | 0.432683 | Neurog1/T    |
| GO_BP_m3GO:006173 | mitochondrial 2/539         | 8/23843   | 0.013049 | 0.45856 | 0.432683 | Dlat/Dld     |
| GO_BP_m3GO:190333 | regulation 2/539            | 8/23843   | 0.013049 | 0.45856 | 0.432683 | Bag5/Pdia3   |
| GO_BP_m3GO:200080 | regulation 2/539            | 8/23843   | 0.013049 | 0.45856 | 0.432683 | Bcl2l1/Nlgr  |
| GO_BP_m3GO:190321 | regulation 6/539            | 86/23843  | 0.013319 | 0.45856 | 0.432683 | Ablim3/He    |
| GO_BP_m3GO:000758 | body fluid 7/539            | 112/23843 | 0.013736 | 0.45856 | 0.432683 | Aqp5/Ghrh    |
| GO_BP_m3GO:004247 | inner ear nerve 7/539       | 112/23843 | 0.013736 | 0.45856 | 0.432683 | Abr/Foxi1/I  |
| GO_BP_m3GO:003581 | regulation 3/539            | 23/23843  | 0.014536 | 0.45856 | 0.432683 | Avp/Oxt/Ta   |
| GO_BP_m3GO:000319 | endocardial 4/539           | 42/23843  | 0.014669 | 0.45856 | 0.432683 | Bmp2/Foxf    |
| GO_BP_m3GO:003581 | renal sodium 3/539          | 24/23843  | 0.016338 | 0.45856 | 0.432683 | Avp/Oxt/Ta   |
| GO_BP_m3GO:000274 | positive regulation 2/539   | 9/23843   | 0.016529 | 0.45856 | 0.432683 | Hk1/Trim6    |
| GO_BP_m3GO:000288 | negative regulation 2/539   | 9/23843   | 0.016529 | 0.45856 | 0.432683 | Abr/Foxf1    |
| GO_BP_m3GO:001401 | Schwann cell 2/539          | 9/23843   | 0.016529 | 0.45856 | 0.432683 | Nf2/Sox10    |
| GO_BP_m3GO:002156 | vestibulocochlear 2/539     | 9/23843   | 0.016529 | 0.45856 | 0.432683 | Neurog1/T    |
| GO_BP_m3GO:003153 | positive regulation 2/539   | 9/23843   | 0.016529 | 0.45856 | 0.432683 | Neurog1/L    |
| GO_BP_m3GO:003509 | behavioral 2/539            | 9/23843   | 0.016529 | 0.45856 | 0.432683 | Chrna4/Ch    |
| GO_BP_m3GO:006042 | lung vasculature 2/539      | 9/23843   | 0.016529 | 0.45856 | 0.432683 | Foxf1/Tcf2:  |
| GO_BP_m3GO:006110 | neuroendocrine 2/539        | 9/23843   | 0.016529 | 0.45856 | 0.432683 | Bmp2/Hes:    |
| GO_BP_m3GO:007047 | positive regulation 2/539   | 9/23843   | 0.016529 | 0.45856 | 0.432683 | Oxt/Tacr1    |
| GO_BP_m3GO:190545 | regulation 2/539            | 9/23843   | 0.016529 | 0.45856 | 0.432683 | Ankle1/Hes:  |
| GO_BP_m3GO:000150 | skeletal system 19/539      | 490/23843 | 0.016615 | 0.45856 | 0.432683 | Axin2/Bmp    |
| GO_BP_m3GO:001810 | peptidyl-serine 14/539      | 325/23843 | 0.016627 | 0.45856 | 0.432683 | Avp/Fnip2/   |
| GO_BP_m3GO:190374 | regulation 6/539            | 91/23843  | 0.017203 | 0.45856 | 0.432683 | Ablim3/He    |
| GO_BP_m3GO:005104 | positive regulation 19/539  | 492/23843 | 0.017259 | 0.45856 | 0.432683 | Avp/Bcl2l1.  |
| GO_BP_m3GO:005088 | neuromuscular 5/539         | 67/23843  | 0.017756 | 0.45856 | 0.432683 | Abr/Grin2c   |
| GO_BP_m3GO:190488 | cranial skeletal 5/539      | 67/23843  | 0.017756 | 0.45856 | 0.432683 | Foxc2/Neu    |
| GO_BP_m3GO:007201 | glomerulus 3/539            | 25/23843  | 0.018261 | 0.45856 | 0.432683 | Foxc2/Hes:   |
| GO_BP_m3GO:000752 | myoblast fusion 4/539       | 45/23843  | 0.018525 | 0.45856 | 0.432683 | Cdon/Myo     |
| GO_BP_m3GO:001071 | positive regulation 4/539   | 45/23843  | 0.018525 | 0.45856 | 0.432683 | Axin2/Bmp    |
| GO_BP_m3GO:006100 | regulation 4/539            | 45/23843  | 0.018525 | 0.45856 | 0.432683 | Caprin1/Cu   |
| GO_BP_m3GO:009869 | regulation 4/539            | 46/23843  | 0.019937 | 0.45856 | 0.432683 | Bcl2l1/Lrrk: |
| GO_BP_m3GO:000762 | copulation 3/539            | 26/23843  | 0.020303 | 0.45856 | 0.432683 | Avp/Oxt/Ta   |

|                   |              |        |          |          |         |          |             |
|-------------------|--------------|--------|----------|----------|---------|----------|-------------|
| GO_BP_m3GO:003106 | regulation   | 3/539  | 26/23843 | 0.020303 | 0.45856 | 0.432683 | Jdp2/Lrrk2, |
| GO_BP_m3GO:004595 | positive re  | 3/539  | 26/23843 | 0.020303 | 0.45856 | 0.432683 | Bcl2l1/Nlgr |
| GO_BP_m3GO:006003 | pharyngeal   | 3/539  | 26/23843 | 0.020303 | 0.45856 | 0.432683 | Hes1/Ptch1  |
| GO_BP_m3GO:006143 | renal syste  | 3/539  | 26/23843 | 0.020303 | 0.45856 | 0.432683 | Foxc2/Hes1  |
| GO_BP_m3GO:006144 | kidney vas   | 3/539  | 26/23843 | 0.020303 | 0.45856 | 0.432683 | Foxc2/Hes1  |
| GO_BP_m3GO:000209 | negative re  | 2/539  | 10/23843 | 0.020355 | 0.45856 | 0.432683 | Atxn2/Lrrtr |
| GO_BP_m3GO:004330 | negative re  | 2/539  | 10/23843 | 0.020355 | 0.45856 | 0.432683 | Abr/Foxf1   |
| GO_BP_m3GO:004349 | regulation   | 2/539  | 10/23843 | 0.020355 | 0.45856 | 0.432683 | Cdon/Hes1   |
| GO_BP_m3GO:009859 | learned vor  | 2/539  | 10/23843 | 0.020355 | 0.45856 | 0.432683 | Neurog1/T   |
| GO_BP_m3GO:190011 | regulation   | 2/539  | 10/23843 | 0.020355 | 0.45856 | 0.432683 | Kdm4b/Kd    |
| GO_BP_m3GO:006084 | artery deve  | 6/539  | 96/23843 | 0.021801 | 0.45856 | 0.432683 | Foxc2/Foxf  |
| GO_BP_m3GO:004211 | neutrophil   | 3/539  | 27/23843 | 0.022467 | 0.45856 | 0.432683 | Abr/Ccl5/D  |
| GO_BP_m3GO:004566 | positive re  | 3/539  | 27/23843 | 0.022467 | 0.45856 | 0.432683 | Cdon/Myo    |
| GO_BP_m3GO:000111 | DNA-temp     | 1/539  | 1/23843  | 0.022606 | 0.45856 | 0.432683 | Gtf2e1      |
| GO_BP_m3GO:000111 | transcripti  | 1/539  | 1/23843  | 0.022606 | 0.45856 | 0.432683 | Gtf2e1      |
| GO_BP_m3GO:000112 | protein-DN   | 1/539  | 1/23843  | 0.022606 | 0.45856 | 0.432683 | Gtf2e1      |
| GO_BP_m3GO:000250 | central tole | 1/539  | 1/23843  | 0.022606 | 0.45856 | 0.432683 | Aire        |
| GO_BP_m3GO:000718 | transmemt    | 1/539  | 1/23843  | 0.022606 | 0.45856 | 0.432683 | Ptpre       |
| GO_BP_m3GO:000751 | myoblast f   | 1/539  | 1/23843  | 0.022606 | 0.45856 | 0.432683 | Myod1       |
| GO_BP_m3GO:000908 | threonine k  | 1/539  | 1/23843  | 0.022606 | 0.45856 | 0.432683 | Thnsl2      |
| GO_BP_m3GO:000981 | defense re   | 1/539  | 1/23843  | 0.022606 | 0.45856 | 0.432683 | Tfeb        |
| GO_BP_m3GO:001015 | response tr  | 1/539  | 1/23843  | 0.022606 | 0.45856 | 0.432683 | Ptch1       |
| GO_BP_m3GO:001019 | response tr  | 1/539  | 1/23843  | 0.022606 | 0.45856 | 0.432683 | Tacr1       |
| GO_BP_m3GO:001482 | detection c  | 1/539  | 1/23843  | 0.022606 | 0.45856 | 0.432683 | Foxf1       |
| GO_BP_m3GO:001490 | myoblast fi  | 1/539  | 1/23843  | 0.022606 | 0.45856 | 0.432683 | Mymk        |
| GO_BP_m3GO:001579 | glycerol-3-  | 1/539  | 1/23843  | 0.022606 | 0.45856 | 0.432683 | Slc37a2     |
| GO_BP_m3GO:002185 | GABAergic    | 1/539  | 1/23843  | 0.022606 | 0.45856 | 0.432683 | Helt        |
| GO_BP_m3GO:003070 | vitelline m  | 1/539  | 1/23843  | 0.022606 | 0.45856 | 0.432683 | Ihh         |
| GO_BP_m3GO:003419 | activation c | 1/539  | 1/23843  | 0.022606 | 0.45856 | 0.432683 | Ucn         |
| GO_BP_m3GO:003568 | helper T ce  | 1/539  | 1/23843  | 0.022606 | 0.45856 | 0.432683 | Ccl5        |
| GO_BP_m3GO:003568 | T-helper 1   | 1/539  | 1/23843  | 0.022606 | 0.45856 | 0.432683 | Ccl5        |
| GO_BP_m3GO:003568 | T-helper 1   | 1/539  | 1/23843  | 0.022606 | 0.45856 | 0.432683 | Ccl5        |
| GO_BP_m3GO:004235 | GDP-L-fuc    | 1/539  | 1/23843  | 0.022606 | 0.45856 | 0.432683 | Fuk         |
| GO_BP_m3GO:004350 | skeletal m   | 1/539  | 1/23843  | 0.022606 | 0.45856 | 0.432683 | Myod1       |
| GO_BP_m3GO:004508 | negative re  | 1/539  | 1/23843  | 0.022606 | 0.45856 | 0.432683 | Trib2       |
| GO_BP_m3GO:004636 | 2-oxobuty    | 1/539  | 1/23843  | 0.022606 | 0.45856 | 0.432683 | Thnsl2      |
| GO_BP_m3GO:004636 | 2-oxobuty    | 1/539  | 1/23843  | 0.022606 | 0.45856 | 0.432683 | Thnsl2      |
| GO_BP_m3GO:004689 | response tr  | 1/539  | 1/23843  | 0.022606 | 0.45856 | 0.432683 | Bcl2l1      |
| GO_BP_m3GO:004807 | negative re  | 1/539  | 1/23843  | 0.022606 | 0.45856 | 0.432683 | Ihh         |
| GO_BP_m3GO:004808 | negative re  | 1/539  | 1/23843  | 0.022606 | 0.45856 | 0.432683 | Ihh         |
| GO_BP_m3GO:004817 | negative re  | 1/539  | 1/23843  | 0.022606 | 0.45856 | 0.432683 | Syt4        |
| GO_BP_m3GO:004856 | ectoderma    | 1/539  | 1/23843  | 0.022606 | 0.45856 | 0.432683 | Foxf1       |
| GO_BP_m3GO:004861 | embryonic    | 1/539  | 1/23843  | 0.022606 | 0.45856 | 0.432683 | Foxf1       |
| GO_BP_m3GO:004862 | post-embr    | 1/539  | 1/23843  | 0.022606 | 0.45856 | 0.432683 | Nkx2-3      |
| GO_BP_m3GO:004878 | cytoskeleta  | 1/539  | 1/23843  | 0.022606 | 0.45856 | 0.432683 | Nlgn1       |
| GO_BP_m3GO:005104 | negative re  | 1/539  | 1/23843  | 0.022606 | 0.45856 | 0.432683 | Bmp2        |
| GO_BP_m3GO:005106 | dihydrolipc  | 1/539  | 1/23843  | 0.022606 | 0.45856 | 0.432683 | Dld         |
| GO_BP_m3GO:006046 | right lung   | r1/539 | 1/23843  | 0.022606 | 0.45856 | 0.432683 | Foxf1       |

|                                 |        |           |          |         |          |            |
|---------------------------------|--------|-----------|----------|---------|----------|------------|
| GO_BP_m3GO:006080 positive reg  | 1/539  | 1/23843   | 0.022606 | 0.45856 | 0.432683 | Bmp2       |
| GO_BP_m3GO:006110 regulation    | 1/539  | 1/23843   | 0.022606 | 0.45856 | 0.432683 | Hes1       |
| GO_BP_m3GO:006110 negative re   | 1/539  | 1/23843   | 0.022606 | 0.45856 | 0.432683 | Hes1       |
| GO_BP_m3GO:006170 vesicle fusio | 1/539  | 1/23843   | 0.022606 | 0.45856 | 0.432683 | Syt4       |
| GO_BP_m3GO:007267 mitochondr    | 1/539  | 1/23843   | 0.022606 | 0.45856 | 0.432683 | Ankzf1     |
| GO_BP_m3GO:009010 mesenchym     | 1/539  | 1/23843   | 0.022606 | 0.45856 | 0.432683 | Foxf1      |
| GO_BP_m3GO:009017 microtubul    | 1/539  | 1/23843   | 0.022606 | 0.45856 | 0.432683 | Ccdc155    |
| GO_BP_m3GO:009711 neurexin cl   | 1/539  | 1/23843   | 0.022606 | 0.45856 | 0.432683 | Nlgn1      |
| GO_BP_m3GO:009727 creatinine l  | 1/539  | 1/23843   | 0.022606 | 0.45856 | 0.432683 | Tfap2b     |
| GO_BP_m3GO:009727 cellular am   | 1/539  | 1/23843   | 0.022606 | 0.45856 | 0.432683 | Tfap2b     |
| GO_BP_m3GO:009727 cellular cre  | 1/539  | 1/23843   | 0.022606 | 0.45856 | 0.432683 | Tfap2b     |
| GO_BP_m3GO:009727 cellular ure  | 1/539  | 1/23843   | 0.022606 | 0.45856 | 0.432683 | Tfap2b     |
| GO_BP_m3GO:009880 reduced fo    | 1/539  | 1/23843   | 0.022606 | 0.45856 | 0.432683 | Slc19a1    |
| GO_BP_m3GO:009894 retrograde    | 1/539  | 1/23843   | 0.022606 | 0.45856 | 0.432683 | Nlgn1      |
| GO_BP_m3GO:009910 regulation    | 1/539  | 1/23843   | 0.022606 | 0.45856 | 0.432683 | Syt4       |
| GO_BP_m3GO:014004 regulation    | 1/539  | 1/23843   | 0.022606 | 0.45856 | 0.432683 | Twist1     |
| GO_BP_m3GO:014005 positive reg  | 1/539  | 1/23843   | 0.022606 | 0.45856 | 0.432683 | Twist1     |
| GO_BP_m3GO:190150 negative re   | 1/539  | 1/23843   | 0.022606 | 0.45856 | 0.432683 | Stoml1     |
| GO_BP_m3GO:190170 mesenchym     | 1/539  | 1/23843   | 0.022606 | 0.45856 | 0.432683 | Ranbp3l    |
| GO_BP_m3GO:190247 regulation    | 1/539  | 1/23843   | 0.022606 | 0.45856 | 0.432683 | Tfeb       |
| GO_BP_m3GO:190304 regulation    | 1/539  | 1/23843   | 0.022606 | 0.45856 | 0.432683 | Chrna4     |
| GO_BP_m3GO:190312 regulation    | 1/539  | 1/23843   | 0.022606 | 0.45856 | 0.432683 | Lrrk2      |
| GO_BP_m3GO:190312 negative re   | 1/539  | 1/23843   | 0.022606 | 0.45856 | 0.432683 | Lrrk2      |
| GO_BP_m3GO:190312 negative re   | 1/539  | 1/23843   | 0.022606 | 0.45856 | 0.432683 | Lrrk2      |
| GO_BP_m3GO:190480 Wnt signal    | 1/539  | 1/23843   | 0.022606 | 0.45856 | 0.432683 | Lrrk2      |
| GO_BP_m3GO:190510 manchette     | 1/539  | 1/23843   | 0.022606 | 0.45856 | 0.432683 | Cep131     |
| GO_BP_m3GO:190522 epicardium    | 1/539  | 1/23843   | 0.022606 | 0.45856 | 0.432683 | Tgfb1      |
| GO_BP_m3GO:190541 negative re   | 1/539  | 1/23843   | 0.022606 | 0.45856 | 0.432683 | Syt4       |
| GO_BP_m3GO:190541 positive reg  | 1/539  | 1/23843   | 0.022606 | 0.45856 | 0.432683 | Syt4       |
| GO_BP_m3GO:190543 regulation    | 1/539  | 1/23843   | 0.022606 | 0.45856 | 0.432683 | Syt4       |
| GO_BP_m3GO:190543 negative re   | 1/539  | 1/23843   | 0.022606 | 0.45856 | 0.432683 | Syt4       |
| GO_BP_m3GO:190545 regulation    | 1/539  | 1/23843   | 0.022606 | 0.45856 | 0.432683 | Ankle1     |
| GO_BP_m3GO:190551 regulation    | 1/539  | 1/23843   | 0.022606 | 0.45856 | 0.432683 | Nlgn1      |
| GO_BP_m3GO:190552 positive reg  | 1/539  | 1/23843   | 0.022606 | 0.45856 | 0.432683 | Nlgn1      |
| GO_BP_m3GO:190560 positive reg  | 1/539  | 1/23843   | 0.022606 | 0.45856 | 0.432683 | Nlgn1      |
| GO_BP_m3GO:199022 paranodal     | 1/539  | 1/23843   | 0.022606 | 0.45856 | 0.432683 | Whrn       |
| GO_BP_m3GO:199090 intramanch    | 1/539  | 1/23843   | 0.022606 | 0.45856 | 0.432683 | Cep131     |
| GO_BP_m3GO:200080 regulation    | 1/539  | 1/23843   | 0.022606 | 0.45856 | 0.432683 | Twist1     |
| GO_BP_m3GO:200080 positive reg  | 1/539  | 1/23843   | 0.022606 | 0.45856 | 0.432683 | Twist1     |
| GO_BP_m3GO:200081 negative re   | 1/539  | 1/23843   | 0.022606 | 0.45856 | 0.432683 | Myod1      |
| GO_BP_m3GO:000751 muscle org    | 16/539 | 405/23843 | 0.022771 | 0.45856 | 0.432683 | Bmp2/Cdo   |
| GO_BP_m3GO:006034 bone morph    | 6/539  | 97/23843  | 0.022811 | 0.45856 | 0.432683 | Axin2/Col2 |
| GO_BP_m3GO:000150 detection c   | 4/539  | 48/23843  | 0.022955 | 0.45856 | 0.432683 | Car6/Pigr1 |
| GO_BP_m3GO:005190 positive reg  | 4/539  | 48/23843  | 0.022955 | 0.45856 | 0.432683 | Avp/Chrna  |
| GO_BP_m3GO:006100 cell differer | 4/539  | 48/23843  | 0.022955 | 0.45856 | 0.432683 | Foxc2/Hes1 |
| GO_BP_m3GO:000200 lens develc   | 5/539  | 72/23843  | 0.023494 | 0.46153 | 0.435486 | Cdon/Crya  |
| GO_BP_m3GO:003050 regulation    | 5/539  | 72/23843  | 0.023494 | 0.46153 | 0.435486 | Bmp2/Gpr   |
| GO_BP_m3GO:005090 neuromusc     | 7/539  | 125/23843 | 0.023634 | 0.46153 | 0.435486 | Abr/Atxn2/ |

|                                |        |           |          |         |          |             |
|--------------------------------|--------|-----------|----------|---------|----------|-------------|
| GO_BP_m3GO:200102regulation    | 9/539  | 183/23843 | 0.023756 | 0.46153 | 0.435486 | Ankle1/Arr  |
| GO_BP_m3GO:000211aggressive    | 2/539  | 11/23843  | 0.02451  | 0.46153 | 0.435486 | Avp/Tacr1   |
| GO_BP_m3GO:002155trigeminal    | 12/539 | 11/23843  | 0.02451  | 0.46153 | 0.435486 | Neurog1/T   |
| GO_BP_m3GO:004592regulation    | 2/539  | 11/23843  | 0.02451  | 0.46153 | 0.435486 | Avp/Oxt     |
| GO_BP_m3GO:006007micturition   | 2/539  | 11/23843  | 0.02451  | 0.46153 | 0.435486 | Chrnb4/Ta   |
| GO_BP_m3GO:006130cardiac net   | 2/539  | 11/23843  | 0.02451  | 0.46153 | 0.435486 | Hes1/Twist  |
| GO_BP_m3GO:007047regulation    | 2/539  | 11/23843  | 0.02451  | 0.46153 | 0.435486 | Oxt/Tacr1   |
| GO_BP_m3GO:014005neuron prc    | 2/539  | 11/23843  | 0.02451  | 0.46153 | 0.435486 | Lrrk2/Nlgn  |
| GO_BP_m3GO:004580negative re   | 4/539  | 49/23843  | 0.024562 | 0.46153 | 0.435486 | Atxn2/Lrrtr |
| GO_BP_m3GO:005077positive re   | 4/539  | 49/23843  | 0.024562 | 0.46153 | 0.435486 | Caprin1/Cu  |
| GO_BP_m3GO:001045exit from n   | 3/539  | 28/23843  | 0.02475  | 0.46153 | 0.435486 | Ctdp1/Neu   |
| GO_BP_m3GO:004859embryonic     | 3/539  | 28/23843  | 0.02475  | 0.46153 | 0.435486 | Cryaa/lhh/  |
| GO_BP_m3GO:000206chondrocyt    | 6/539  | 99/23843  | 0.024924 | 0.46153 | 0.435486 | Axin2/Bmp   |
| GO_BP_m3GO:003010regulation    | 11/539 | 247/23843 | 0.025525 | 0.46153 | 0.435486 | Abr/Atxn2/  |
| GO_BP_m3GO:001401positive re   | 5/539  | 74/23843  | 0.026088 | 0.46153 | 0.435486 | Bmp2/Hes1   |
| GO_BP_m3GO:001401negative re   | 4/539  | 50/23843  | 0.026236 | 0.46153 | 0.435486 | Atf5/Hes1/  |
| GO_BP_m3GO:003010water hom     | 4/539  | 50/23843  | 0.026236 | 0.46153 | 0.435486 | Avp/Cela2a  |
| GO_BP_m3GO:003513hindlimb n    | 4/539  | 50/23843  | 0.026236 | 0.46153 | 0.435486 | Gdf5/Ptch1  |
| GO_BP_m3GO:003517social beha   | 4/539  | 50/23843  | 0.026236 | 0.46153 | 0.435486 | Avp/Mkks/   |
| GO_BP_m3GO:005170intraspecie   | 4/539  | 50/23843  | 0.026236 | 0.46153 | 0.435486 | Avp/Mkks/   |
| GO_BP_m3GO:003288regulation    | 10/539 | 218/23843 | 0.027104 | 0.46153 | 0.435486 | 1110004E0   |
| GO_BP_m3GO:004311regulation    | 3/539  | 29/23843  | 0.027154 | 0.46153 | 0.435486 | Abr/Tacr1/  |
| GO_BP_m3GO:004406regulation    | 3/539  | 29/23843  | 0.027154 | 0.46153 | 0.435486 | Avp/Oxt/Ta  |
| GO_BP_m3GO:006031cardiac epi   | 3/539  | 29/23843  | 0.027154 | 0.46153 | 0.435486 | Bmp2/Tgft   |
| GO_BP_m3GO:003028bone mine     | 6/539  | 101/23843 | 0.027164 | 0.46153 | 0.435486 | Axin2/Bmp   |
| GO_BP_m3GO:000741synapse as    | 8/539  | 158/23843 | 0.027545 | 0.46153 | 0.435486 | 2610042L0   |
| GO_BP_m3GO:000164osteoblast    | 9/539  | 188/23843 | 0.027634 | 0.46153 | 0.435486 | Areg/Axin2  |
| GO_BP_m3GO:001082negative re   | 4/539  | 51/23843  | 0.027976 | 0.46153 | 0.435486 | Avp/Bcl2l1  |
| GO_BP_m3GO:005091sensory pe    | 4/539  | 51/23843  | 0.027976 | 0.46153 | 0.435486 | Car6/Pigr1  |
| GO_BP_m3GO:000165ureteric bu   | 6/539  | 102/23843 | 0.028332 | 0.46153 | 0.435486 | Bmp2/Crlf1  |
| GO_BP_m3GO:007216mesonephr     | 6/539  | 102/23843 | 0.028332 | 0.46153 | 0.435486 | Bmp2/Crlf1  |
| GO_BP_m3GO:007216mesonephr     | 6/539  | 102/23843 | 0.028332 | 0.46153 | 0.435486 | Bmp2/Crlf1  |
| GO_BP_m3GO:009747synaptic ve   | 7/539  | 130/23843 | 0.02849  | 0.46153 | 0.435486 | Ap3s1/Bcl2  |
| GO_BP_m3GO:190330regulation    | 7/539  | 130/23843 | 0.02849  | 0.46153 | 0.435486 | Abr/Bcl2l1/ |
| GO_BP_m3GO:190395positive re   | 5/539  | 76/23843  | 0.028858 | 0.46153 | 0.435486 | Ablim3/He   |
| GO_BP_m3GO:004856embryonic     | 18/539 | 486/23843 | 0.028871 | 0.46153 | 0.435486 | Abr/Cryaa/  |
| GO_BP_m3GO:000608acetyl-CoA    | 2/539  | 12/23843  | 0.028978 | 0.46153 | 0.435486 | Dlat/Dld    |
| GO_BP_m3GO:000907serine fami   | 2/539  | 12/23843  | 0.028978 | 0.46153 | 0.435486 | Gcsh/Thnsl  |
| GO_BP_m3GO:003043peristalsis   | 2/539  | 12/23843  | 0.028978 | 0.46153 | 0.435486 | Neurog1/T   |
| GO_BP_m3GO:004521cell-cell jur | 2/539  | 12/23843  | 0.028978 | 0.46153 | 0.435486 | Prtn3/Whrr  |
| GO_BP_m3GO:007047uterine sm    | 2/539  | 12/23843  | 0.028978 | 0.46153 | 0.435486 | Oxt/Tacr1   |
| GO_BP_m3GO:000320endocardia    | 3/539  | 30/23843  | 0.029678 | 0.46153 | 0.435486 | Bmp2/Tgft   |
| GO_BP_m3GO:004592negative re   | 3/539  | 30/23843  | 0.029678 | 0.46153 | 0.435486 | Abr/Foxf1/  |
| GO_BP_m3GO:003080positive re   | 4/539  | 52/23843  | 0.029784 | 0.46153 | 0.435486 | Avp/Ghrhr   |
| GO_BP_m3GO:004880genitalia d   | 4/539  | 52/23843  | 0.029784 | 0.46153 | 0.435486 | Dhcr24/Ne   |
| GO_BP_m3GO:005091detection c   | 4/539  | 52/23843  | 0.029784 | 0.46153 | 0.435486 | Car6/Pigr1  |
| GO_BP_m3GO:003121biomineral    | 7/539  | 132/23843 | 0.030609 | 0.46153 | 0.435486 | Axin2/Bmp   |
| GO_BP_m3GO:007098demethylat    | 4/539  | 53/23843  | 0.031659 | 0.46153 | 0.435486 | Hsf4/Kdm4   |

|                   |               |        |           |          |         |          |              |
|-------------------|---------------|--------|-----------|----------|---------|----------|--------------|
| GO_BP_m3GO:190275 | negative re   | 4/539  | 53/23843  | 0.031659 | 0.46153 | 0.435486 | Atf5/Fanci/  |
| GO_BP_m3GO:005071 | positive re   | 7/539  | 133/23843 | 0.031707 | 0.46153 | 0.435486 | C1qtnf4/Hl   |
| GO_BP_m3GO:005196 | regulation    | 5/539  | 78/23843  | 0.031807 | 0.46153 | 0.435486 | Grik2/Grm    |
| GO_BP_m3GO:190374 | positive re   | 5/539  | 78/23843  | 0.031807 | 0.46153 | 0.435486 | Ablim3/He    |
| GO_BP_m3GO:000182 | mesonephr     | 6/539  | 105/23843 | 0.032034 | 0.46153 | 0.435486 | Bmp2/Crlf1   |
| GO_BP_m3GO:007052 | protein kin   | 3/539  | 31/23843  | 0.032321 | 0.46153 | 0.435486 | Avp/Prkch/   |
| GO_BP_m3GO:009016 | establishm    | 3/539  | 31/23843  | 0.032321 | 0.46153 | 0.435486 | Crb3/Foxf1   |
| GO_BP_m3GO:200046 | positive re   | 3/539  | 31/23843  | 0.032321 | 0.46153 | 0.435486 | Cux2/Nlgn    |
| GO_BP_m3GO:001401 | regulation    | 7/539  | 134/23843 | 0.032831 | 0.46153 | 0.435486 | Atf5/Bmp2    |
| GO_BP_m3GO:004247 | ear morph     | 7/539  | 134/23843 | 0.032831 | 0.46153 | 0.435486 | Abr/Foxi1/I  |
| GO_BP_m3GO:000758 | excretion     | 4/539  | 54/23843  | 0.033602 | 0.46153 | 0.435486 | Avp/Chrn     |
| GO_BP_m3GO:000732 | inseminati    | 2/539  | 13/23843  | 0.033742 | 0.46153 | 0.435486 | Oxt/Tacr1    |
| GO_BP_m3GO:000735 | tripartite re | 2/539  | 13/23843  | 0.033742 | 0.46153 | 0.435486 | Neurog1/T    |
| GO_BP_m3GO:000859 | anterior/pc   | 2/539  | 13/23843  | 0.033742 | 0.46153 | 0.435486 | Neurog1/T    |
| GO_BP_m3GO:000922 | nucleotide    | 2/539  | 13/23843  | 0.033742 | 0.46153 | 0.435486 | Fuk/Pmm1     |
| GO_BP_m3GO:001975 | one-carbo     | 2/539  | 13/23843  | 0.033742 | 0.46153 | 0.435486 | Aqp5/Slc1    |
| GO_BP_m3GO:003122 | auditory be   | 2/539  | 13/23843  | 0.033742 | 0.46153 | 0.435486 | Neurog1/T    |
| GO_BP_m3GO:003209 | negative re   | 2/539  | 13/23843  | 0.033742 | 0.46153 | 0.435486 | Mkks/Ucn     |
| GO_BP_m3GO:003369 | positive re   | 2/539  | 13/23843  | 0.033742 | 0.46153 | 0.435486 | Bmp2/Tme     |
| GO_BP_m3GO:003581 | positive re   | 2/539  | 13/23843  | 0.033742 | 0.46153 | 0.435486 | Oxt/Tacr1    |
| GO_BP_m3GO:004311 | positive re   | 2/539  | 13/23843  | 0.033742 | 0.46153 | 0.435486 | Tacr1/Ucn    |
| GO_BP_m3GO:004559 | positive re   | 2/539  | 13/23843  | 0.033742 | 0.46153 | 0.435486 | Cd46/Carr    |
| GO_BP_m3GO:005157 | negative re   | 2/539  | 13/23843  | 0.033742 | 0.46153 | 0.435486 | Kdm4b/Kd     |
| GO_BP_m3GO:007010 | interleukin   | 2/539  | 13/23843  | 0.033742 | 0.46153 | 0.435486 | C1qtnf4/Ct   |
| GO_BP_m3GO:007064 | protein mo    | 7/539  | 135/23843 | 0.033981 | 0.46153 | 0.435486 | Cops7a/Ep    |
| GO_BP_m3GO:009730 | response tr   | 7/539  | 135/23843 | 0.033981 | 0.46153 | 0.435486 | Bcl2l1/Hpg   |
| GO_BP_m3GO:004881 | regulation    | 6/539  | 107/23843 | 0.034669 | 0.46153 | 0.435486 | Caprin1/Cu   |
| GO_BP_m3GO:006034 | bone devel    | 9/539  | 196/23843 | 0.034733 | 0.46153 | 0.435486 | Axin2/Bmp    |
| GO_BP_m3GO:001715 | regulation    | 5/539  | 80/23843  | 0.034938 | 0.46153 | 0.435486 | Bcl2l1/Lrrk  |
| GO_BP_m3GO:003509 | response tr   | 3/539  | 32/23843  | 0.035083 | 0.46153 | 0.435486 | Chrna4/Ch    |
| GO_BP_m3GO:003623 | granulocyt    | 3/539  | 32/23843  | 0.035083 | 0.46153 | 0.435486 | Abr/Ccl5/D   |
| GO_BP_m3GO:004481 | mitotic G2    | 3/539  | 32/23843  | 0.035083 | 0.46153 | 0.435486 | Fanci/Ier3/I |
| GO_BP_m3GO:006025 | regulation    | 3/539  | 32/23843  | 0.035083 | 0.46153 | 0.435486 | Hes1/Prkch   |
| GO_BP_m3GO:006035 | cartilage d   | 3/539  | 32/23843  | 0.035083 | 0.46153 | 0.435486 | Axin2/Col2   |
| GO_BP_m3GO:004566 | regulation    | 7/539  | 136/23843 | 0.035158 | 0.46153 | 0.435486 | Areg/Axin2   |
| GO_BP_m3GO:000300 | heart mor     | 11/539 | 260/23843 | 0.03516  | 0.46153 | 0.435486 | Axin2/Bmp    |
| GO_BP_m3GO:001820 | peptidyl-se   | 14/539 | 360/23843 | 0.035522 | 0.46153 | 0.435486 | Avp/Fnip2/   |
| GO_BP_m3GO:004660 | regulation    | 4/539  | 55/23843  | 0.035613 | 0.46153 | 0.435486 | Atf5/Ccnf/C  |
| GO_BP_m3GO:004853 | thymus dev    | 4/539  | 55/23843  | 0.035613 | 0.46153 | 0.435486 | Aire/Hes1/   |
| GO_BP_m3GO:005122 | positive re   | 17/539 | 464/23843 | 0.036018 | 0.46153 | 0.435486 | Ablim3/C1    |
| GO_BP_m3GO:003524 | synaptic tr   | 6/539  | 108/23843 | 0.036037 | 0.46153 | 0.435486 | Grik2/Grik4  |
| GO_BP_m3GO:007200 | nephron e     | 6/539  | 108/23843 | 0.036037 | 0.46153 | 0.435486 | Bmp2/Foxc    |
| GO_BP_m3GO:007016 | regulation    | 5/539  | 81/23843  | 0.036572 | 0.46153 | 0.435486 | Bmp2/Gpr     |
| GO_BP_m3GO:000150 | ossification  | 14/539 | 362/23843 | 0.036939 | 0.46153 | 0.435486 | Areg/Axin2   |
| GO_BP_m3GO:000693 | smooth m      | 6/539  | 109/23843 | 0.037439 | 0.46153 | 0.435486 | Chrn4/M      |
| GO_BP_m3GO:000150 | action pote   | 7/539  | 138/23843 | 0.037592 | 0.46153 | 0.435486 | Catsper4/C   |
| GO_BP_m3GO:000683 | mitochond     | 11/539 | 263/23843 | 0.037705 | 0.46153 | 0.435486 | Ablim3/Bcl   |
| GO_BP_m3GO:009059 | sensory or    | 12/539 | 296/23843 | 0.037804 | 0.46153 | 0.435486 | Abr/Aqp5/    |

|                                |        |           |          |         |          |             |
|--------------------------------|--------|-----------|----------|---------|----------|-------------|
| GO_BP_m3GO:004566 positive re  | 16/539 | 432/23843 | 0.037827 | 0.46153 | 0.435486 | Bend6/Bmi   |
| GO_BP_m3GO:004568 negative re  | 3/539  | 33/23843  | 0.037962 | 0.46153 | 0.435486 | Atf5/Hes1/  |
| GO_BP_m3GO:004804 embryonic    | 3/539  | 33/23843  | 0.037962 | 0.46153 | 0.435486 | Cryaa/Ihh/  |
| GO_BP_m3GO:004852 positive re  | 3/539  | 33/23843  | 0.037962 | 0.46153 | 0.435486 | Ghrhr/Nlgr  |
| GO_BP_m3GO:004856 embryonic    | 3/539  | 33/23843  | 0.037962 | 0.46153 | 0.435486 | Foxf1/Ihh/  |
| GO_BP_m3GO:000300 regionaliza  | 14/539 | 364/23843 | 0.038396 | 0.46153 | 0.435486 | Axin2/Bmp   |
| GO_BP_m3GO:001404 positive re  | 2/539  | 14/23843  | 0.038787 | 0.46153 | 0.435486 | Avp/Syt4    |
| GO_BP_m3GO:003209 negative re  | 2/539  | 14/23843  | 0.038787 | 0.46153 | 0.435486 | Mkks/Ucn    |
| GO_BP_m3GO:003556 positive re  | 2/539  | 14/23843  | 0.038787 | 0.46153 | 0.435486 | Kdm4d/Tui   |
| GO_BP_m3GO:004324 erythrocyte  | 2/539  | 14/23843  | 0.038787 | 0.46153 | 0.435486 | Klf2/L3mbt  |
| GO_BP_m3GO:004519 establishme  | 2/539  | 14/23843  | 0.038787 | 0.46153 | 0.435486 | Crb3/Foxf1  |
| GO_BP_m3GO:005178 negative re  | 2/539  | 14/23843  | 0.038787 | 0.46153 | 0.435486 | Ptch1/Susc  |
| GO_BP_m3GO:006018 female mat   | 2/539  | 14/23843  | 0.038787 | 0.46153 | 0.435486 | Avp/Oxt     |
| GO_BP_m3GO:006130 cardiac net  | 2/539  | 14/23843  | 0.038787 | 0.46153 | 0.435486 | Hes1/Twist  |
| GO_BP_m3GO:190002 positive re  | 2/539  | 14/23843  | 0.038787 | 0.46153 | 0.435486 | Nlgn1/Carr  |
| GO_BP_m3GO:005149 regulation   | 5/539  | 83/23843  | 0.03998  | 0.46153 | 0.435486 | Mkks/Nf2/   |
| GO_BP_m3GO:004883 inner ear d  | 9/539  | 202/23843 | 0.040818 | 0.46153 | 0.435486 | Abr/Bmp2/   |
| GO_BP_m3GO:004667 response tr  | 12/539 | 300/23843 | 0.041169 | 0.46153 | 0.435486 | Ankzf1/Bcl  |
| GO_BP_m3GO:007207 kidney epit  | 7/539  | 141/23843 | 0.041446 | 0.46153 | 0.435486 | Bmp2/Crlf1  |
| GO_BP_m3GO:002153 telencepha   | 10/539 | 236/23843 | 0.042901 | 0.46153 | 0.435486 | Atat1/Atf5/ |
| GO_BP_m3GO:000279 positive re  | 12/539 | 302/23843 | 0.042928 | 0.46153 | 0.435486 | C1qtnf4/Ex  |
| GO_BP_m3GO:004876 mesenchyr    | 9/539  | 204/23843 | 0.042997 | 0.46153 | 0.435486 | Axin2/Bmp   |
| GO_BP_m3GO:001607 synaptic ve  | 5/539  | 85/23843  | 0.043574 | 0.46153 | 0.435486 | Bcl2l1/Lrrk |
| GO_BP_m3GO:004598 positive re  | 5/539  | 85/23843  | 0.043574 | 0.46153 | 0.435486 | Avp/Bcl2l1  |
| GO_BP_m3GO:190054 positive re  | 5/539  | 85/23843  | 0.043574 | 0.46153 | 0.435486 | Avp/Bcl2l1  |
| GO_BP_m3GO:005089 cognition    | 12/539 | 303/23843 | 0.043826 | 0.46153 | 0.435486 | Chrna4/Cu   |
| GO_BP_m3GO:190495 positive re  | 17/539 | 476/23843 | 0.043977 | 0.46153 | 0.435486 | Ablim3/C1   |
| GO_BP_m3GO:000761 long-term    | 3/539  | 35/23843  | 0.044071 | 0.46153 | 0.435486 | Prkc/Sgk1   |
| GO_BP_m3GO:000273 regulation   | 2/539  | 15/23843  | 0.044098 | 0.46153 | 0.435486 | Hk1/Trim6   |
| GO_BP_m3GO:002169 cerebellar   | 12/539 | 15/23843  | 0.044098 | 0.46153 | 0.435486 | Atxn2/Whr   |
| GO_BP_m3GO:006130 cardiac net  | 2/539  | 15/23843  | 0.044098 | 0.46153 | 0.435486 | Hes1/Twist  |
| GO_BP_m3GO:007072 response tr  | 2/539  | 15/23843  | 0.044098 | 0.46153 | 0.435486 | Ptch1/Tgfb  |
| GO_BP_m3GO:190107 regulation   | 2/539  | 15/23843  | 0.044098 | 0.46153 | 0.435486 | Neurog1/T   |
| GO_BP_m3GO:190446 positive re  | 2/539  | 15/23843  | 0.044098 | 0.46153 | 0.435486 | C1qtnf4/Lr  |
| GO_BP_m3GO:001922 cytokine-nr  | 14/539 | 372/23843 | 0.044633 | 0.46153 | 0.435486 | C1qtnf4/Cc  |
| GO_BP_m3GO:000157 medium-cl    | 1/539  | 2/23843   | 0.044702 | 0.46153 | 0.435486 | Slc27a4     |
| GO_BP_m3GO:000241 immunoglc    | 1/539  | 2/23843   | 0.044702 | 0.46153 | 0.435486 | Pigr        |
| GO_BP_m3GO:000245 peripheral   | 1/539  | 2/23843   | 0.044702 | 0.46153 | 0.435486 | Aire        |
| GO_BP_m3GO:000246 peripheral   | 1/539  | 2/23843   | 0.044702 | 0.46153 | 0.435486 | Aire        |
| GO_BP_m3GO:000250 central tole | 1/539  | 2/23843   | 0.044702 | 0.46153 | 0.435486 | Aire        |
| GO_BP_m3GO:000324 cardiac mu   | 1/539  | 2/23843   | 0.044702 | 0.46153 | 0.435486 | S1pr1       |
| GO_BP_m3GO:000612 glycerophc   | 1/539  | 2/23843   | 0.044702 | 0.46153 | 0.435486 | Slc37a2     |
| GO_BP_m3GO:000671 estrogen c   | 1/539  | 2/23843   | 0.044702 | 0.46153 | 0.435486 | Ugt1a7c     |
| GO_BP_m3GO:000743 ectoderma    | 1/539  | 2/23843   | 0.044702 | 0.46153 | 0.435486 | Foxf1       |
| GO_BP_m3GO:000910 lipocate me  | 1/539  | 2/23843   | 0.044702 | 0.46153 | 0.435486 | Dld         |
| GO_BP_m3GO:000981 defense re   | 1/539  | 2/23843   | 0.044702 | 0.46153 | 0.435486 | Tfeb        |
| GO_BP_m3GO:001905 suppressio   | 1/539  | 2/23843   | 0.044702 | 0.46153 | 0.435486 | Bcl2l1      |
| GO_BP_m3GO:002199 neural plat  | 1/539  | 2/23843   | 0.044702 | 0.46153 | 0.435486 | Ptch1       |

|                   |                    |         |          |         |          |          |
|-------------------|--------------------|---------|----------|---------|----------|----------|
| GO_BP_m3GO:003242 | regulation 1/539   | 2/23843 | 0.044702 | 0.46153 | 0.435486 | Axin2    |
| GO_BP_m3GO:003568 | helper T ce1/539   | 2/23843 | 0.044702 | 0.46153 | 0.435486 | Ccl5     |
| GO_BP_m3GO:003580 | egg coat fc1/539   | 2/23843 | 0.044702 | 0.46153 | 0.435486 | Ihh      |
| GO_BP_m3GO:003952 | modulator1/539     | 2/23843 | 0.044702 | 0.46153 | 0.435486 | Bcl2l1   |
| GO_BP_m3GO:004331 | negative re1/539   | 2/23843 | 0.044702 | 0.46153 | 0.435486 | Abr      |
| GO_BP_m3GO:004516 | cell-cell sig1/539 | 2/23843 | 0.044702 | 0.46153 | 0.435486 | Hes1     |
| GO_BP_m3GO:004597 | positive re1/539   | 2/23843 | 0.044702 | 0.46153 | 0.435486 | Hes1     |
| GO_BP_m3GO:004622 | coumarin c1/539    | 2/23843 | 0.044702 | 0.46153 | 0.435486 | Ugt1a7c  |
| GO_BP_m3GO:004627 | phenylpro1/539     | 2/23843 | 0.044702 | 0.46153 | 0.435486 | Ugt1a7c  |
| GO_BP_m3GO:004633 | lateral inhib1/539 | 2/23843 | 0.044702 | 0.46153 | 0.435486 | Hes1     |
| GO_BP_m3GO:004807 | regulation 1/539   | 2/23843 | 0.044702 | 0.46153 | 0.435486 | Ihh      |
| GO_BP_m3GO:004834 | paraxial me1/539   | 2/23843 | 0.044702 | 0.46153 | 0.435486 | Foxc2    |
| GO_BP_m3GO:004834 | paraxial me1/539   | 2/23843 | 0.044702 | 0.46153 | 0.435486 | Foxc2    |
| GO_BP_m3GO:004861 | embryonic 1/539    | 2/23843 | 0.044702 | 0.46153 | 0.435486 | Foxf1    |
| GO_BP_m3GO:005104 | regulation 1/539   | 2/23843 | 0.044702 | 0.46153 | 0.435486 | Bmp2     |
| GO_BP_m3GO:005195 | methotrex1/539     | 2/23843 | 0.044702 | 0.46153 | 0.435486 | Slc19a1  |
| GO_BP_m3GO:005274 | inositol ph1/539   | 2/23843 | 0.044702 | 0.46153 | 0.435486 | Ippk     |
| GO_BP_m3GO:006013 | somatotrop1/539    | 2/23843 | 0.044702 | 0.46153 | 0.435486 | Ghrhr    |
| GO_BP_m3GO:006022 | camera-ty1/539     | 2/23843 | 0.044702 | 0.46153 | 0.435486 | Ihh      |
| GO_BP_m3GO:006031 | negative re1/539   | 2/23843 | 0.044702 | 0.46153 | 0.435486 | Abr      |
| GO_BP_m3GO:006045 | positive re1/539   | 2/23843 | 0.044702 | 0.46153 | 0.435486 | Oxt      |
| GO_BP_m3GO:006045 | right lung c1/539  | 2/23843 | 0.044702 | 0.46153 | 0.435486 | Foxf1    |
| GO_BP_m3GO:006059 | dichotomo1/539     | 2/23843 | 0.044702 | 0.46153 | 0.435486 | Areg     |
| GO_BP_m3GO:006110 | stomach n1/539     | 2/23843 | 0.044702 | 0.46153 | 0.435486 | Hes1     |
| GO_BP_m3GO:007010 | positive re1/539   | 2/23843 | 0.044702 | 0.46153 | 0.435486 | C1qtnf4  |
| GO_BP_m3GO:007191 | urea transr1/539   | 2/23843 | 0.044702 | 0.46153 | 0.435486 | Slc14a1  |
| GO_BP_m3GO:007192 | alpha-tubu1/539    | 2/23843 | 0.044702 | 0.46153 | 0.435486 | Atat1    |
| GO_BP_m3GO:007201 | glomerular1/539    | 2/23843 | 0.044702 | 0.46153 | 0.435486 | Foxc2    |
| GO_BP_m3GO:007207 | kidney inte1/539   | 2/23843 | 0.044702 | 0.46153 | 0.435486 | Hes1     |
| GO_BP_m3GO:007214 | renal inters1/539  | 2/23843 | 0.044702 | 0.46153 | 0.435486 | Hes1     |
| GO_BP_m3GO:008012 | AMP transr1/539    | 2/23843 | 0.044702 | 0.46153 | 0.435486 | Slc25a17 |
| GO_BP_m3GO:009727 | ammonia f1/539     | 2/23843 | 0.044702 | 0.46153 | 0.435486 | Tfap2b   |
| GO_BP_m3GO:009727 | urea home1/539     | 2/23843 | 0.044702 | 0.46153 | 0.435486 | Tfap2b   |
| GO_BP_m3GO:009753 | stress resp1/539   | 2/23843 | 0.044702 | 0.46153 | 0.435486 | Klf2     |
| GO_BP_m3GO:009753 | cellular stre1/539 | 2/23843 | 0.044702 | 0.46153 | 0.435486 | Klf2     |
| GO_BP_m3GO:009753 | thymus epi1/539    | 2/23843 | 0.044702 | 0.46153 | 0.435486 | Aire     |
| GO_BP_m3GO:009874 | cerebellar r1/539  | 2/23843 | 0.044702 | 0.46153 | 0.435486 | Nanos1   |
| GO_BP_m3GO:009896 | regulation 1/539   | 2/23843 | 0.044702 | 0.46153 | 0.435486 | Chrna4   |
| GO_BP_m3GO:009954 | trans-syna1/539    | 2/23843 | 0.044702 | 0.46153 | 0.435486 | Nlgn1    |
| GO_BP_m3GO:190158 | regulation 1/539   | 2/23843 | 0.044702 | 0.46153 | 0.435486 | Stoml1   |
| GO_BP_m3GO:190225 | negative re1/539   | 2/23843 | 0.044702 | 0.46153 | 0.435486 | Foxc2    |
| GO_BP_m3GO:190231 | positive re1/539   | 2/23843 | 0.044702 | 0.46153 | 0.435486 | Dusp26   |
| GO_BP_m3GO:190249 | positive re1/539   | 2/23843 | 0.044702 | 0.46153 | 0.435486 | Lrrk2    |
| GO_BP_m3GO:190407 | presynaptic1/539   | 2/23843 | 0.044702 | 0.46153 | 0.435486 | Nlgn1    |
| GO_BP_m3GO:190469 | positive re1/539   | 2/23843 | 0.044702 | 0.46153 | 0.435486 | Ptprn    |
| GO_BP_m3GO:190527 | regulation 1/539   | 2/23843 | 0.044702 | 0.46153 | 0.435486 | Lrrk2    |
| GO_BP_m3GO:190528 | regulation 1/539   | 2/23843 | 0.044702 | 0.46153 | 0.435486 | Lrrk2    |
| GO_BP_m3GO:199050 | dense core1/539    | 2/23843 | 0.044702 | 0.46153 | 0.435486 | Ptprn    |

|                                             |           |          |          |          |             |
|---------------------------------------------|-----------|----------|----------|----------|-------------|
| GO_BP_m3GO:200022regulation 1/539           | 2/23843   | 0.044702 | 0.46153  | 0.435486 | Hes1        |
| GO_BP_m3GO:200022negative re1/539           | 2/23843   | 0.044702 | 0.46153  | 0.435486 | Hes1        |
| GO_BP_m3GO:200027negative re1/539           | 2/23843   | 0.044702 | 0.46153  | 0.435486 | Twist1      |
| GO_BP_m3GO:200046negative re1/539           | 2/23843   | 0.044702 | 0.46153  | 0.435486 | Lrrk2       |
| GO_BP_m3GO:200081negative re1/539           | 2/23843   | 0.044702 | 0.46153  | 0.435486 | Carmil2     |
| GO_BP_m3GO:200116positive re1/539           | 2/23843   | 0.044702 | 0.46153  | 0.435486 | Ctr9        |
| GO_BP_m3GO:000165metanephros5/539           | 86/23843  | 0.045442 | 0.466919 | 0.440571 | Foxc2/Hes1  |
| GO_BP_m3GO:001922transmission5/539          | 86/23843  | 0.045442 | 0.466919 | 0.440571 | Avp/Chrnab  |
| GO_BP_m3GO:005104negative re10/539          | 239/23843 | 0.046039 | 0.471471 | 0.444865 | Abr/Btn1a1  |
| GO_BP_m3GO:000761learning or11/539          | 272/23843 | 0.046104 | 0.471471 | 0.444865 | Cux2/Gip/C  |
| GO_BP_m3GO:004873skeletal system10/539      | 240/23843 | 0.047118 | 0.478578 | 0.451572 | Axin2/Col2  |
| GO_BP_m3GO:190227regulation 8/539           | 176/23843 | 0.047215 | 0.478578 | 0.451572 | Ctr9/Jdp2/  |
| GO_BP_m3GO:001025multicellular3/539         | 36/23843  | 0.047297 | 0.478578 | 0.451572 | Ghrhr/Helt  |
| GO_BP_m3GO:004871regulation 3/539           | 36/23843  | 0.047297 | 0.478578 | 0.451572 | Atf5/Bmp2   |
| GO_BP_m3GO:003101pancreas development5/539  | 87/23843  | 0.047356 | 0.478578 | 0.451572 | Foxf1/Gip/I |
| GO_BP_m3GO:005196negative re13/539          | 342/23843 | 0.048434 | 0.479167 | 0.452128 | Atf5/Bag5/  |
| GO_BP_m3GO:000228neutrophil 2/539           | 16/23843  | 0.049659 | 0.479167 | 0.452128 | Abr/Dnase   |
| GO_BP_m3GO:000335regulation 2/539           | 16/23843  | 0.049659 | 0.479167 | 0.452128 | 1110004E0   |
| GO_BP_m3GO:000683water transport2/539       | 16/23843  | 0.049659 | 0.479167 | 0.452128 | Aqp5/Slc14  |
| GO_BP_m3GO:000763mechanosensory2/539        | 16/23843  | 0.049659 | 0.479167 | 0.452128 | Neurog1/T   |
| GO_BP_m3GO:001404regulation 2/539           | 16/23843  | 0.049659 | 0.479167 | 0.452128 | Dleu2/Lrrk1 |
| GO_BP_m3GO:003210negative re2/539           | 16/23843  | 0.049659 | 0.479167 | 0.452128 | Mkks/Ucn    |
| GO_BP_m3GO:003210negative re2/539           | 16/23843  | 0.049659 | 0.479167 | 0.452128 | Mkks/Ucn    |
| GO_BP_m3GO:003223positive re2/539           | 16/23843  | 0.049659 | 0.479167 | 0.452128 | Nlgn1/Tacr  |
| GO_BP_m3GO:003363positive re2/539           | 16/23843  | 0.049659 | 0.479167 | 0.452128 | Ccl5/Foxc2  |
| GO_BP_m3GO:003511genitalia maturation2/539  | 16/23843  | 0.049659 | 0.479167 | 0.452128 | Neurog1/T   |
| GO_BP_m3GO:003612histone H3 2/539           | 16/23843  | 0.049659 | 0.479167 | 0.452128 | Kdm4b/Kdm   |
| GO_BP_m3GO:004308penile erection2/539       | 16/23843  | 0.049659 | 0.479167 | 0.452128 | Avp/Oxt     |
| GO_BP_m3GO:004826negative re2/539           | 16/23843  | 0.049659 | 0.479167 | 0.452128 | Atxn2/Lrrtr |
| GO_BP_m3GO:004871positive re2/539           | 16/23843  | 0.049659 | 0.479167 | 0.452128 | Bmp2/Hes1   |
| GO_BP_m3GO:006025negative re2/539           | 16/23843  | 0.049659 | 0.479167 | 0.452128 | Hes1/Sox11  |
| GO_BP_m3GO:006064mammary gland2/539         | 16/23843  | 0.049659 | 0.479167 | 0.452128 | Foxf1/Ptch1 |
| GO_BP_m3GO:007162vocalization2/539          | 16/23843  | 0.049659 | 0.479167 | 0.452128 | Neurog1/T   |
| GO_BP_m3GO:009022chromosome2/539            | 16/23843  | 0.049659 | 0.479167 | 0.452128 | Ankle1/Cccn |
| GO_BP_m3GO:200072negative re2/539           | 16/23843  | 0.049659 | 0.479167 | 0.452128 | Bmp2/Ctdp   |
| GO_BP_m3GO:003050positive re3/539           | 37/23843  | 0.050636 | 0.479167 | 0.452128 | Bmp2/Gpr    |
| GO_BP_m3GO:004662negative re3/539           | 37/23843  | 0.050636 | 0.479167 | 0.452128 | Prkcz/Ptprc |
| GO_BP_m3GO:003139regulation 8/539           | 179/23843 | 0.051202 | 0.479167 | 0.452128 | Bag5/Ctr9/  |
| GO_BP_m3GO:000076syncytium formation4/539   | 62/23843  | 0.051601 | 0.479167 | 0.452128 | Cdon/Myo    |
| GO_BP_m3GO:006103regulation 4/539           | 62/23843  | 0.051601 | 0.479167 | 0.452128 | Axin2/Bmp   |
| GO_BP_m3GO:000709centrosome6/539            | 118/23843 | 0.051632 | 0.479167 | 0.452128 | Atf5/Ccnf/C |
| GO_BP_m3GO:003105regulation 7/539           | 149/23843 | 0.052946 | 0.479167 | 0.452128 | Ctr9/Jdp2/  |
| GO_BP_m3GO:000057embryonic 3/539            | 38/23843  | 0.054087 | 0.479167 | 0.452128 | Neurog1/P   |
| GO_BP_m3GO:000272positive re3/539           | 38/23843  | 0.054087 | 0.479167 | 0.452128 | Hk1/Prkcz/  |
| GO_BP_m3GO:000727synaptic transmission3/539 | 38/23843  | 0.054087 | 0.479167 | 0.452128 | Chrna4/Ch   |
| GO_BP_m3GO:007221metanephros3/539           | 38/23843  | 0.054087 | 0.479167 | 0.452128 | Hes1/Tcf21  |
| GO_BP_m3GO:009880regulation 3/539           | 38/23843  | 0.054087 | 0.479167 | 0.452128 | Avp/Oxt/Tc  |
| GO_BP_m3GO:006099dendritic spine4/539       | 63/23843  | 0.054158 | 0.479167 | 0.452128 | Caprin1/Cu  |



|                   |               |         |           |          |          |          |              |
|-------------------|---------------|---------|-----------|----------|----------|----------|--------------|
| GO_BP_m3GO:003313 | positive re   | 6/539   | 120/23843 | 0.055175 | 0.479167 | 0.452128 | Avp/Fnrip2/  |
| GO_BP_m3GO:190353 | regulation    | 6/539   | 120/23843 | 0.055175 | 0.479167 | 0.452128 | Ablim3/He    |
| GO_BP_m3GO:000608 | acetyl-CoA2   | /539    | 17/23843  | 0.055458 | 0.479167 | 0.452128 | Dlat/Dld     |
| GO_BP_m3GO:000709 | regulation    | 2/539   | 17/23843  | 0.055458 | 0.479167 | 0.452128 | Neurog1/L    |
| GO_BP_m3GO:000735 | blastoderm    | 2/539   | 17/23843  | 0.055458 | 0.479167 | 0.452128 | Neurog1/T    |
| GO_BP_m3GO:003001 | maintenance   | 2/539   | 17/23843  | 0.055458 | 0.479167 | 0.452128 | Pdzd11/Ca    |
| GO_BP_m3GO:003433 | cell junction | 2/539   | 17/23843  | 0.055458 | 0.479167 | 0.452128 | Prtn3/Whrr   |
| GO_BP_m3GO:003439 | telomere      | lc2/539 | 17/23843  | 0.055458 | 0.479167 | 0.452128 | Ankle1/Ccc   |
| GO_BP_m3GO:003447 | snRNA 3'-c    | 2/539   | 17/23843  | 0.055458 | 0.479167 | 0.452128 | Exosc6/Ints  |
| GO_BP_m3GO:005144 | negative re   | 2/539   | 17/23843  | 0.055458 | 0.479167 | 0.452128 | Bag5/Mad3    |
| GO_BP_m3GO:000694 | syncytium     | 4/539   | 64/23843  | 0.056781 | 0.479167 | 0.452128 | Cdon/Myo     |
| GO_BP_m3GO:004692 | regulation    | 4/539   | 64/23843  | 0.056781 | 0.479167 | 0.452128 | Bcl2l1/Lrrk1 |
| GO_BP_m3GO:004848 | synaptic ve   | 6/539   | 121/23843 | 0.057001 | 0.479167 | 0.452128 | Ap3s1/Bcl2   |
| GO_BP_m3GO:009748 | establishm    | 6/539   | 121/23843 | 0.057001 | 0.479167 | 0.452128 | Ap3s1/Bcl2   |
| GO_BP_m3GO:002198 | pituitary gl. | 3/539   | 39/23843  | 0.057647 | 0.479167 | 0.452128 | Bmp2/Ghrf    |
| GO_BP_m3GO:003107 | embryonic     | 3/539   | 39/23843  | 0.057647 | 0.479167 | 0.452128 | Cryaa/Ihh/   |
| GO_BP_m3GO:005506 | monovalen     | 7/539   | 152/23843 | 0.057727 | 0.479167 | 0.452128 | Avp/Lrrk2/   |
| GO_BP_m3GO:000693 | muscle cor    | 11/539  | 283/23843 | 0.058    | 0.479167 | 0.452128 | Chrn4/Ct     |
| GO_BP_m3GO:005121 | cartilage d   | 8/539   | 184/23843 | 0.058317 | 0.479167 | 0.452128 | Axin2/Bmp    |
| GO_BP_m3GO:005076 | negative re   | 12/539  | 318/23843 | 0.058901 | 0.479167 | 0.452128 | Atf5/Bag5/   |
| GO_BP_m3GO:190432 | response tr   | 4/539   | 65/23843  | 0.059472 | 0.479167 | 0.452128 | Fdx1/Mir10   |
| GO_BP_m3GO:190432 | cellular res  | 4/539   | 65/23843  | 0.059472 | 0.479167 | 0.452128 | Fdx1/Mir10   |
| GO_BP_m3GO:007050 | regulation    | 8/539   | 185/23843 | 0.059811 | 0.479167 | 0.452128 | Atat1/Atf5/  |
| GO_BP_m3GO:003027 | negative re   | 5/539   | 93/23843  | 0.059836 | 0.479167 | 0.452128 | Areg/Axin2   |
| GO_BP_m3GO:006144 | connective    | 10/539  | 251/23843 | 0.060125 | 0.479167 | 0.452128 | Axin2/Bmp    |
| GO_BP_m3GO:004856 | digestive tr  | 6/539   | 123/23843 | 0.06076  | 0.479167 | 0.452128 | Foxf1/Hes1   |
| GO_BP_m3GO:003541 | protein loc   | 3/539   | 40/23843  | 0.061315 | 0.479167 | 0.452128 | Grin2c/Lrrt  |
| GO_BP_m3GO:005070 | regulation    | 8/539   | 186/23843 | 0.061329 | 0.479167 | 0.452128 | Btn1a1/C1c   |
| GO_BP_m3GO:000152 | pseudouric    | 2/539   | 18/23843  | 0.06148  | 0.479167 | 0.452128 | Pus7l/Rpus   |
| GO_BP_m3GO:000195 | positive re   | 2/539   | 18/23843  | 0.06148  | 0.479167 | 0.452128 | Bcl2l1/Nlgr  |
| GO_BP_m3GO:001607 | rRNA catak    | 2/539   | 18/23843  | 0.06148  | 0.479167 | 0.452128 | Dis3/Exosc   |
| GO_BP_m3GO:003316 | positive re   | 2/539   | 18/23843  | 0.06148  | 0.479167 | 0.452128 | Lrrk2/Ptpn1  |
| GO_BP_m3GO:003458 | piRNA met     | 2/539   | 18/23843  | 0.06148  | 0.479167 | 0.452128 | Mov10l1/P    |
| GO_BP_m3GO:003508 | establishm    | 2/539   | 18/23843  | 0.06148  | 0.479167 | 0.452128 | Crb3/Foxf1   |
| GO_BP_m3GO:003631 | response tr   | 2/539   | 18/23843  | 0.06148  | 0.479167 | 0.452128 | Ptch1/Tgfb   |
| GO_BP_m3GO:004271 | maternal b    | 2/539   | 18/23843  | 0.06148  | 0.479167 | 0.452128 | Avp/Oxt      |
| GO_BP_m3GO:011002 | regulation    | 5/539   | 94/23843  | 0.062081 | 0.479167 | 0.452128 | Mkks/Nf2f1   |
| GO_BP_m3GO:000988 | embryonic     | 4/539   | 66/23843  | 0.062229 | 0.479167 | 0.452128 | Ihh/Neurog   |
| GO_BP_m3GO:006147 | response tr   | 4/539   | 66/23843  | 0.062229 | 0.479167 | 0.452128 | Fdx1/Mir10   |
| GO_BP_m3GO:003238 | positive re   | 10/539  | 253/23843 | 0.062718 | 0.479167 | 0.452128 | Ablim3/Bcl   |
| GO_BP_m3GO:007265 | establishm    | 7/539   | 155/23843 | 0.062765 | 0.479167 | 0.452128 | Ablim3/He    |
| GO_BP_m3GO:006105 | somite dev    | 5/539   | 95/23843  | 0.064373 | 0.479167 | 0.452128 | Axin2/Foxc   |
| GO_BP_m3GO:009917 | regulation    | 4/539   | 67/23843  | 0.065053 | 0.479167 | 0.452128 | Caprin1/Ct   |
| GO_BP_m3GO:000018 | activation    | c3/539  | 41/23843  | 0.06509  | 0.479167 | 0.452128 | Lrrk2/Map1   |
| GO_BP_m3GO:002152 | spinal cord   | 3/539   | 41/23843  | 0.06509  | 0.479167 | 0.452128 | Mir19a/Nk    |
| GO_BP_m3GO:190007 | negative re   | 3/539   | 41/23843  | 0.06509  | 0.479167 | 0.452128 | Prkc3/Ptpre  |
| GO_BP_m3GO:007123 | cellular res  | 8/539   | 189/23843 | 0.066027 | 0.479167 | 0.452128 | Ankzf1/Fdx   |
| GO_BP_m3GO:009025 | regulation    | 9/539   | 222/23843 | 0.066154 | 0.479167 | 0.452128 | Chrn4/Ct     |

|                   |              |       |         |        |          |          |           |
|-------------------|--------------|-------|---------|--------|----------|----------|-----------|
| GO_BP_m3GO:000212 | maternal a   | 1/539 | 3/23843 | 0.0663 | 0.479167 | 0.452128 | Avp       |
| GO_BP_m3GO:000235 | immune re    | 1/539 | 3/23843 | 0.0663 | 0.479167 | 0.452128 | Pigr      |
| GO_BP_m3GO:000241 | immunogl     | 1/539 | 3/23843 | 0.0663 | 0.479167 | 0.452128 | Pigr      |
| GO_BP_m3GO:000305 | angiotensin  | 1/539 | 3/23843 | 0.0663 | 0.479167 | 0.452128 | Tacr1     |
| GO_BP_m3GO:000313 | BMP signal   | 1/539 | 3/23843 | 0.0663 | 0.479167 | 0.452128 | Bmp2      |
| GO_BP_m3GO:000313 | endoderm     | 1/539 | 3/23843 | 0.0663 | 0.479167 | 0.452128 | Bmp2      |
| GO_BP_m3GO:000313 | endoderm     | 1/539 | 3/23843 | 0.0663 | 0.479167 | 0.452128 | Bmp2      |
| GO_BP_m3GO:000327 | apoptotic p  | 1/539 | 3/23843 | 0.0663 | 0.479167 | 0.452128 | Foxc2     |
| GO_BP_m3GO:000643 | valyl-tRNA   | 1/539 | 3/23843 | 0.0663 | 0.479167 | 0.452128 | Vars      |
| GO_BP_m3GO:000654 | glycine cat  | 1/539 | 3/23843 | 0.0663 | 0.479167 | 0.452128 | Gcsh      |
| GO_BP_m3GO:000673 | NADH reg     | 1/539 | 3/23843 | 0.0663 | 0.479167 | 0.452128 | Hk1       |
| GO_BP_m3GO:000929 | GDP-man      | 1/539 | 3/23843 | 0.0663 | 0.479167 | 0.452128 | Pmm1      |
| GO_BP_m3GO:001470 | branchiom    | 1/539 | 3/23843 | 0.0663 | 0.479167 | 0.452128 | Tcf21     |
| GO_BP_m3GO:001591 | aminophos    | 1/539 | 3/23843 | 0.0663 | 0.479167 | 0.452128 | Tmem30b   |
| GO_BP_m3GO:001653 | intein-med   | 1/539 | 3/23843 | 0.0663 | 0.479167 | 0.452128 | Ihh       |
| GO_BP_m3GO:001946 | glycine dec  | 1/539 | 3/23843 | 0.0663 | 0.479167 | 0.452128 | Gcsh      |
| GO_BP_m3GO:002155 | trochlear n  | 1/539 | 3/23843 | 0.0663 | 0.479167 | 0.452128 | Hes1      |
| GO_BP_m3GO:002191 | regulation   | 1/539 | 3/23843 | 0.0663 | 0.479167 | 0.452128 | Nkx6-1    |
| GO_BP_m3GO:003090 | protein spli | 1/539 | 3/23843 | 0.0663 | 0.479167 | 0.452128 | Ihh       |
| GO_BP_m3GO:003305 | directional  | 1/539 | 3/23843 | 0.0663 | 0.479167 | 0.452128 | Grin2c    |
| GO_BP_m3GO:003312 | negative re  | 1/539 | 3/23843 | 0.0663 | 0.479167 | 0.452128 | Twist1    |
| GO_BP_m3GO:003366 | negative re  | 1/539 | 3/23843 | 0.0663 | 0.479167 | 0.452128 | Bcl2l1    |
| GO_BP_m3GO:003475 | negative re  | 1/539 | 3/23843 | 0.0663 | 0.479167 | 0.452128 | Hamp2     |
| GO_BP_m3GO:003475 | regulation   | 1/539 | 3/23843 | 0.0663 | 0.479167 | 0.452128 | Hamp2     |
| GO_BP_m3GO:003476 | negative re  | 1/539 | 3/23843 | 0.0663 | 0.479167 | 0.452128 | Hamp2     |
| GO_BP_m3GO:003505 | embryonic    | 1/539 | 3/23843 | 0.0663 | 0.479167 | 0.452128 | Bmp2      |
| GO_BP_m3GO:003646 | synaptic ve  | 1/539 | 3/23843 | 0.0663 | 0.479167 | 0.452128 | Bcl2l1    |
| GO_BP_m3GO:004209 | interleukin  | 1/539 | 3/23843 | 0.0663 | 0.479167 | 0.452128 | Trib2     |
| GO_BP_m3GO:004235 | GDP-L-fuc    | 1/539 | 3/23843 | 0.0663 | 0.479167 | 0.452128 | Fuk       |
| GO_BP_m3GO:004266 | auditory re  | 1/539 | 3/23843 | 0.0663 | 0.479167 | 0.452128 | Hes1      |
| GO_BP_m3GO:004270 | eye photor   | 1/539 | 3/23843 | 0.0663 | 0.479167 | 0.452128 | Ihh       |
| GO_BP_m3GO:004313 | hindgut co   | 1/539 | 3/23843 | 0.0663 | 0.479167 | 0.452128 | Oxt       |
| GO_BP_m3GO:004313 | regulation   | 1/539 | 3/23843 | 0.0663 | 0.479167 | 0.452128 | Oxt       |
| GO_BP_m3GO:004338 | positive re  | 1/539 | 3/23843 | 0.0663 | 0.479167 | 0.452128 | Cd46      |
| GO_BP_m3GO:004431 | protein K6   | 1/539 | 3/23843 | 0.0663 | 0.479167 | 0.452128 | Otud3     |
| GO_BP_m3GO:004477 | meiotic DN   | 1/539 | 3/23843 | 0.0663 | 0.479167 | 0.452128 | Oraov1    |
| GO_BP_m3GO:004507 | regulation   | 1/539 | 3/23843 | 0.0663 | 0.479167 | 0.452128 | Trib2     |
| GO_BP_m3GO:004560 | negative re  | 1/539 | 3/23843 | 0.0663 | 0.479167 | 0.452128 | Hes1      |
| GO_BP_m3GO:004655 | photorecep   | 1/539 | 3/23843 | 0.0663 | 0.479167 | 0.452128 | Ihh       |
| GO_BP_m3GO:004836 | lateral mes  | 1/539 | 3/23843 | 0.0663 | 0.479167 | 0.452128 | Foxf1     |
| GO_BP_m3GO:004837 | lateral mes  | 1/539 | 3/23843 | 0.0663 | 0.479167 | 0.452128 | Foxf1     |
| GO_BP_m3GO:004837 | lateral mes  | 1/539 | 3/23843 | 0.0663 | 0.479167 | 0.452128 | Foxf1     |
| GO_BP_m3GO:004849 | synaptic ve  | 1/539 | 3/23843 | 0.0663 | 0.479167 | 0.452128 | Syngn1    |
| GO_BP_m3GO:005204 | negative re  | 1/539 | 3/23843 | 0.0663 | 0.479167 | 0.452128 | Bcl2l1    |
| GO_BP_m3GO:005249 | negative re  | 1/539 | 3/23843 | 0.0663 | 0.479167 | 0.452128 | Bcl2l1    |
| GO_BP_m3GO:006002 | regulation   | 1/539 | 3/23843 | 0.0663 | 0.479167 | 0.452128 | 2610042L0 |
| GO_BP_m3GO:006008 | synaptic tr  | 1/539 | 3/23843 | 0.0663 | 0.479167 | 0.452128 | Chrnb4    |
| GO_BP_m3GO:006012 | corticotrop  | 1/539 | 3/23843 | 0.0663 | 0.479167 | 0.452128 | Bmp2      |

|                                     |           |          |          |          |             |
|-------------------------------------|-----------|----------|----------|----------|-------------|
| GO_BP_m3GO:006015cellular prc1/539  | 3/23843   | 0.0663   | 0.479167 | 0.452128 | Bcl2l1      |
| GO_BP_m3GO:006043bronchiole 1/539   | 3/23843   | 0.0663   | 0.479167 | 0.452128 | Tcf21       |
| GO_BP_m3GO:006095response to 1/539  | 3/23843   | 0.0663   | 0.479167 | 0.452128 | Bcl2l1      |
| GO_BP_m3GO:006105negative re1/539   | 3/23843   | 0.0663   | 0.479167 | 0.452128 | Bag5        |
| GO_BP_m3GO:006115regulation 1/539   | 3/23843   | 0.0663   | 0.479167 | 0.452128 | Axin2       |
| GO_BP_m3GO:006162canonical c1/539   | 3/23843   | 0.0663   | 0.479167 | 0.452128 | Hk1         |
| GO_BP_m3GO:006171glucose cat1/539   | 3/23843   | 0.0663   | 0.479167 | 0.452128 | Hk1         |
| GO_BP_m3GO:007163nuclear prc1/539   | 3/23843   | 0.0663   | 0.479167 | 0.452128 | Ankzf1      |
| GO_BP_m3GO:007213mesenchym1/539     | 3/23843   | 0.0663   | 0.479167 | 0.452128 | Bmp2        |
| GO_BP_m3GO:007227metaneph1/539      | 3/23843   | 0.0663   | 0.479167 | 0.452128 | Tcf21       |
| GO_BP_m3GO:007227metaneph1/539      | 3/23843   | 0.0663   | 0.479167 | 0.452128 | Tcf21       |
| GO_BP_m3GO:007227metaneph1/539      | 3/23843   | 0.0663   | 0.479167 | 0.452128 | Tcf21       |
| GO_BP_m3GO:009908retrograde 1/539   | 3/23843   | 0.0663   | 0.479167 | 0.452128 | Syt4        |
| GO_BP_m3GO:009950regulation 1/539   | 3/23843   | 0.0663   | 0.479167 | 0.452128 | Calb2       |
| GO_BP_m3GO:009956synaptic m1/539    | 3/23843   | 0.0663   | 0.479167 | 0.452128 | Nlgn1       |
| GO_BP_m3GO:190225regulation 1/539   | 3/23843   | 0.0663   | 0.479167 | 0.452128 | Foxc2       |
| GO_BP_m3GO:190256negative re1/539   | 3/23843   | 0.0663   | 0.479167 | 0.452128 | Abr         |
| GO_BP_m3GO:190333positive re1/539   | 3/23843   | 0.0663   | 0.479167 | 0.452128 | Pdia3       |
| GO_BP_m3GO:190507occluding j1/539   | 3/23843   | 0.0663   | 0.479167 | 0.452128 | Tgfb1       |
| GO_BP_m3GO:190507regulation 1/539   | 3/23843   | 0.0663   | 0.479167 | 0.452128 | Tgfb1       |
| GO_BP_m3GO:190507positive re1/539   | 3/23843   | 0.0663   | 0.479167 | 0.452128 | Tgfb1       |
| GO_BP_m3GO:190545negative re1/539   | 3/23843   | 0.0663   | 0.479167 | 0.452128 | Hes1        |
| GO_BP_m3GO:190560regulation 1/539   | 3/23843   | 0.0663   | 0.479167 | 0.452128 | Nlgn1       |
| GO_BP_m3GO:199016protein K21/539    | 3/23843   | 0.0663   | 0.479167 | 0.452128 | Otud3       |
| GO_BP_m3GO:199070presynaptic1/539   | 3/23843   | 0.0663   | 0.479167 | 0.452128 | Nlgn1       |
| GO_BP_m3GO:200005negative re1/539   | 3/23843   | 0.0663   | 0.479167 | 0.452128 | Axin2       |
| GO_BP_m3GO:200011regulation 1/539   | 3/23843   | 0.0663   | 0.479167 | 0.452128 | Stc2        |
| GO_BP_m3GO:200046regulation 1/539   | 3/23843   | 0.0663   | 0.479167 | 0.452128 | Lrrk2       |
| GO_BP_m3GO:200079cell prolifer1/539 | 3/23843   | 0.0663   | 0.479167 | 0.452128 | Twist1      |
| GO_BP_m3GO:200097negative re1/539   | 3/23843   | 0.0663   | 0.479167 | 0.452128 | Hes1        |
| GO_BP_m3GO:200097negative re1/539   | 3/23843   | 0.0663   | 0.479167 | 0.452128 | Hes1        |
| GO_BP_m3GO:200116regulation 1/539   | 3/23843   | 0.0663   | 0.479167 | 0.452128 | Ctr9        |
| GO_BP_m3GO:003102microtubul6/539    | 126/23843 | 0.066668 | 0.479167 | 0.452128 | Atf5/Ccnf/( |
| GO_BP_m3GO:000628regulation 5/539   | 96/23843  | 0.066712 | 0.479167 | 0.452128 | Axin2/D330  |
| GO_BP_m3GO:003003contractile 5/539  | 96/23843  | 0.066712 | 0.479167 | 0.452128 | Mkks/Nf2/(  |
| GO_BP_m3GO:004314stress fiber 5/539 | 96/23843  | 0.066712 | 0.479167 | 0.452128 | Mkks/Nf2/(  |
| GO_BP_m3GO:004577positive re5/539   | 96/23843  | 0.066712 | 0.479167 | 0.452128 | Bmp2/Gpr    |
| GO_BP_m3GO:006095kidney mor5/539    | 96/23843  | 0.066712 | 0.479167 | 0.452128 | Bmp2/Hes:   |
| GO_BP_m3GO:007208nephron tu5/539    | 96/23843  | 0.066712 | 0.479167 | 0.452128 | Bmp2/Hes:   |
| GO_BP_m3GO:000236leukocyte e10/539  | 256/23843 | 0.06674  | 0.479167 | 0.452128 | Abr/Cd46/I  |
| GO_BP_m3GO:006048mesenchym10/539    | 256/23843 | 0.06674  | 0.479167 | 0.452128 | Axin2/Bmp   |
| GO_BP_m3GO:001062programm2/539      | 19/23843  | 0.067713 | 0.479167 | 0.452128 | Dnase1l3/F  |
| GO_BP_m3GO:002169cerebellar l2/539  | 19/23843  | 0.067713 | 0.479167 | 0.452128 | Atxn2/Whr   |
| GO_BP_m3GO:003085polarized e2/539   | 19/23843  | 0.067713 | 0.479167 | 0.452128 | Crb3/Foxf1  |
| GO_BP_m3GO:003209regulation 2/539   | 19/23843  | 0.067713 | 0.479167 | 0.452128 | Mkks/Ucn    |
| GO_BP_m3GO:003360positive re2/539   | 19/23843  | 0.067713 | 0.479167 | 0.452128 | Chrna4/Ox   |
| GO_BP_m3GO:004304DNA meth2/539      | 19/23843  | 0.067713 | 0.479167 | 0.452128 | Mov10l1/P   |
| GO_BP_m3GO:006045positive re2/539   | 19/23843  | 0.067713 | 0.479167 | 0.452128 | Oxt/Tacr1   |

|                   |                       |           |          |          |          |              |
|-------------------|-----------------------|-----------|----------|----------|----------|--------------|
| GO_BP_m3GO:006074 | parental be2/539      | 19/23843  | 0.067713 | 0.479167 | 0.452128 | Avp/Oxt      |
| GO_BP_m3GO:009020 | negative re2/539      | 19/23843  | 0.067713 | 0.479167 | 0.452128 | Avp/Bcl2l1   |
| GO_BP_m3GO:200078 | negative re2/539      | 19/23843  | 0.067713 | 0.479167 | 0.452128 | D330045A:    |
| GO_BP_m3GO:007200 | renal system11/539    | 291/23843 | 0.067825 | 0.479167 | 0.452128 | Bmp2/Crlf1   |
| GO_BP_m3GO:004250 | regulation 4/539      | 68/23843  | 0.067942 | 0.479167 | 0.452128 | Ccl5/Crlf1/  |
| GO_BP_m3GO:004584 | negative re4/539      | 68/23843  | 0.067942 | 0.479167 | 0.452128 | Bmp2/Ctdc    |
| GO_BP_m3GO:004864 | regulation 4/539      | 68/23843  | 0.067942 | 0.479167 | 0.452128 | Cdon/Myo     |
| GO_BP_m3GO:000038 | regulation 3/539      | 42/23843  | 0.068968 | 0.481656 | 0.454476 | Celf5/Mbnl   |
| GO_BP_m3GO:001097 | negative re3/539      | 42/23843  | 0.068968 | 0.481656 | 0.454476 | Fanci/ler3/  |
| GO_BP_m3GO:001607 | snRNA me13/539        | 42/23843  | 0.068968 | 0.481656 | 0.454476 | Exosc6/Ints  |
| GO_BP_m3GO:003105 | negative re3/539      | 42/23843  | 0.068968 | 0.481656 | 0.454476 | Kdm4b/Kd     |
| GO_BP_m3GO:007016 | positive re3/539      | 42/23843  | 0.068968 | 0.481656 | 0.454476 | Bmp2/Gpr     |
| GO_BP_m3GO:009031 | regulation 3/539      | 42/23843  | 0.068968 | 0.481656 | 0.454476 | Jdp2/Lrrk2,  |
| GO_BP_m3GO:001072 | negative re13/539     | 362/23843 | 0.069225 | 0.482666 | 0.455429 | Atf5/Bag5/   |
| GO_BP_m3GO:004239 | regulation 15/539     | 434/23843 | 0.069858 | 0.484926 | 0.457561 | Bcl2l1/Cats  |
| GO_BP_m3GO:007058 | protein loc 7/539     | 159/23843 | 0.069888 | 0.484926 | 0.457561 | Ablim3/He    |
| GO_BP_m3GO:190165 | response tr7/539      | 159/23843 | 0.069888 | 0.484926 | 0.457561 | Bcl2l1/Fdx1  |
| GO_BP_m3GO:006067 | ureteric bu 4/539     | 69/23843  | 0.070897 | 0.491136 | 0.463421 | Bmp2/Hes:    |
| GO_BP_m3GO:000301 | renal system5/539     | 98/23843  | 0.071531 | 0.493493 | 0.465645 | Avp/Chrbn    |
| GO_BP_m3GO:003223 | regulation 5/539      | 98/23843  | 0.071531 | 0.493493 | 0.465645 | Mkks/Nf2/!   |
| GO_BP_m3GO:000226 | cell activation10/539 | 260/23843 | 0.072354 | 0.493493 | 0.465645 | Abr/Cd46/!   |
| GO_BP_m3GO:000170 | cell fate de3/539     | 43/23843  | 0.072949 | 0.493493 | 0.465645 | Hes1/Myoc    |
| GO_BP_m3GO:001802 | peptidyl-ly 3/539     | 43/23843  | 0.072949 | 0.493493 | 0.465645 | Ctr9/Kdm4    |
| GO_BP_m3GO:004519 | establishm3/539       | 43/23843  | 0.072949 | 0.493493 | 0.465645 | Crb3/Foxf1   |
| GO_BP_m3GO:003304 | regulation 12/539     | 330/23843 | 0.0732   | 0.493493 | 0.465645 | Axin2/Ctr9,  |
| GO_BP_m3GO:001620 | regulation 7/539      | 161/23843 | 0.073623 | 0.493493 | 0.465645 | Bmp2/Cdo     |
| GO_BP_m3GO:003090 | hindbrain c 7/539     | 161/23843 | 0.073623 | 0.493493 | 0.465645 | Atf5/Atxn2,  |
| GO_BP_m3GO:002153 | diencephal4/539       | 70/23843  | 0.073917 | 0.493493 | 0.465645 | Bmp2/Ghrf    |
| GO_BP_m3GO:004863 | negative re4/539      | 70/23843  | 0.073917 | 0.493493 | 0.465645 | Bmp2/Ctdc    |
| GO_BP_m3GO:005090 | sensory pe 4/539      | 70/23843  | 0.073917 | 0.493493 | 0.465645 | Car6/Pigr/!  |
| GO_BP_m3GO:007217 | mesoneph4/539         | 70/23843  | 0.073917 | 0.493493 | 0.465645 | Bmp2/Hes:    |
| GO_BP_m3GO:000237 | cytokine se2/539      | 20/23843  | 0.074144 | 0.493493 | 0.465645 | Hk1/Trim6    |
| GO_BP_m3GO:000681 | phosphate 2/539       | 20/23843  | 0.074144 | 0.493493 | 0.465645 | Slc37a2/Stc  |
| GO_BP_m3GO:000834 | determinat2/539       | 20/23843  | 0.074144 | 0.493493 | 0.465645 | Ghrhr/Lrrk2, |
| GO_BP_m3GO:003106 | positive re2/539      | 20/23843  | 0.074144 | 0.493493 | 0.465645 | Jdp2/Lrrk2   |
| GO_BP_m3GO:003538 | thioester b 2/539     | 20/23843  | 0.074144 | 0.493493 | 0.465645 | Dlat/Dld     |
| GO_BP_m3GO:004573 | negative re2/539      | 20/23843  | 0.074144 | 0.493493 | 0.465645 | D330045A:    |
| GO_BP_m3GO:006008 | inhibitory r 2/539    | 20/23843  | 0.074144 | 0.493493 | 0.465645 | Chrna4/Gri   |
| GO_BP_m3GO:006116 | establishm2/539       | 20/23843  | 0.074144 | 0.493493 | 0.465645 | Crb3/Foxf1   |
| GO_BP_m3GO:007063 | transepithe2/539      | 20/23843  | 0.074144 | 0.493493 | 0.465645 | P2ry6/Prss8  |
| GO_BP_m3GO:007161 | acyl-CoA t 2/539      | 20/23843  | 0.074144 | 0.493493 | 0.465645 | Dlat/Dld     |
| GO_BP_m3GO:190520 | negative re2/539      | 20/23843  | 0.074144 | 0.493493 | 0.465645 | Bmp2/Ctdc    |
| GO_BP_m3GO:000628 | DNA repair15/539      | 438/23843 | 0.074208 | 0.493493 | 0.465645 | Axin2/Ccdc   |
| GO_BP_m3GO:005109 | positive re8/539      | 194/23843 | 0.07434  | 0.493493 | 0.465645 | Bmp2/Gnl3    |
| GO_BP_m3GO:009031 | positive re8/539      | 194/23843 | 0.07434  | 0.493493 | 0.465645 | Ablim3/Cej   |
| GO_BP_m3GO:004544 | fat cell diff9/539    | 228/23843 | 0.075337 | 0.496742 | 0.46871  | Atat1/Atf5/  |
| GO_BP_m3GO:009772 | sperm mot5/539        | 100/23843 | 0.076535 | 0.496742 | 0.46871  | Catsper4/C   |
| GO_BP_m3GO:190000 | positive re5/539      | 100/23843 | 0.076535 | 0.496742 | 0.46871  | Caprin1/Cu   |

|                   |                            |          |           |          |          |         |              |
|-------------------|----------------------------|----------|-----------|----------|----------|---------|--------------|
| GO_BP_m3GO:000726 | tyrosine phosphorylation   | 4/539    | 71/23843  | 0.077001 | 0.496742 | 0.46871 | Ccl5/Crlf1/  |
| GO_BP_m3GO:190186 | negative regulation        | 4/539    | 71/23843  | 0.077001 | 0.496742 | 0.46871 | Bmp2/Ctdc    |
| GO_BP_m3GO:003289 | positive regulation        | 3/539    | 44/23843  | 0.07703  | 0.496742 | 0.46871 | Avp/Oxt/Sy   |
| GO_BP_m3GO:004845 | synaptic vesicle transport | 3/539    | 44/23843  | 0.07703  | 0.496742 | 0.46871 | Bcl2l1/Lrrk1 |
| GO_BP_m3GO:000821 | regulation                 | 8/539    | 196/23843 | 0.077834 | 0.496742 | 0.46871 | Adm2/Avp     |
| GO_BP_m3GO:190186 | regulation                 | 7/539    | 164/23843 | 0.079443 | 0.496742 | 0.46871 | Bmp2/Cdo     |
| GO_BP_m3GO:000761 | memory                     | 6/539    | 132/23843 | 0.079454 | 0.496742 | 0.46871 | Cux2/Gipf    |
| GO_BP_m3GO:004505 | regulated expression       | 8/539    | 197/23843 | 0.079618 | 0.496742 | 0.46871 | Abr/Bcl2l1/  |
| GO_BP_m3GO:004244 | hormone binding            | 4/539    | 72/23843  | 0.080148 | 0.496742 | 0.46871 | Bmp2/Fdx1    |
| GO_BP_m3GO:005500 | cardiac muscle cell        | 4/539    | 72/23843  | 0.080148 | 0.496742 | 0.46871 | Bmp2/Foxc    |
| GO_BP_m3GO:000232 | lymphoid cell              | 2/539    | 21/23843  | 0.080761 | 0.496742 | 0.46871 | Ankle1/Hes   |
| GO_BP_m3GO:000762 | grooming                   | 12/539   | 21/23843  | 0.080761 | 0.496742 | 0.46871 | Avp/Oxt      |
| GO_BP_m3GO:003233 | negative regulation        | 2/539    | 21/23843  | 0.080761 | 0.496742 | 0.46871 | Gdf5/Tgfb    |
| GO_BP_m3GO:007211 | cell proliferation         | 2/539    | 21/23843  | 0.080761 | 0.496742 | 0.46871 | Bmp2/Ptch    |
| GO_BP_m3GO:003019 | collagen fibril            | 3/539    | 45/23843  | 0.081209 | 0.496742 | 0.46871 | Adamts14/    |
| GO_BP_m3GO:003052 | androgen response          | 3/539    | 45/23843  | 0.081209 | 0.496742 | 0.46871 | Kdm5d/Me     |
| GO_BP_m3GO:005089 | multicellular              | 3/539    | 45/23843  | 0.081209 | 0.496742 | 0.46871 | Avp/Cela2a   |
| GO_BP_m3GO:006041 | ventricular                | 3/539    | 45/23843  | 0.081209 | 0.496742 | 0.46871 | Hes1/Mir19   |
| GO_BP_m3GO:004863 | regulation                 | 13/539   | 372/23843 | 0.081533 | 0.496742 | 0.46871 | Atxn2/Ctdc   |
| GO_BP_m3GO:003527 | endocrine                  | 6/539    | 133/23843 | 0.081709 | 0.496742 | 0.46871 | Bmp2/Ghrf    |
| GO_BP_m3GO:005105 | negative regulation        | 6/539    | 133/23843 | 0.081709 | 0.496742 | 0.46871 | Ankle1/D3    |
| GO_BP_m3GO:006132 | renal tubule               | 5/539    | 102/23843 | 0.081724 | 0.496742 | 0.46871 | Bmp2/Hes     |
| GO_BP_m3GO:003081 | regulation                 | 4/539    | 73/23843  | 0.083359 | 0.496742 | 0.46871 | Avp/Ghrhr    |
| GO_BP_m3GO:004358 | ear development            | 9/539    | 233/23843 | 0.083559 | 0.496742 | 0.46871 | Abr/Bmp2/    |
| GO_BP_m3GO:000279 | regulation                 | 16/539   | 483/23843 | 0.083774 | 0.496742 | 0.46871 | Btn1a1/C1c   |
| GO_BP_m3GO:005105 | regulation                 | 14/539   | 411/23843 | 0.085233 | 0.496742 | 0.46871 | Ankle1/Ar    |
| GO_BP_m3GO:000301 | muscle system              | 13/539   | 375/23843 | 0.08548  | 0.496742 | 0.46871 | Chrnb4/Clc   |
| GO_BP_m3GO:000209 | regulation                 | 3/539    | 46/23843  | 0.085484 | 0.496742 | 0.46871 | Atxn2/Lrtr   |
| GO_BP_m3GO:003513 | forelimb                   | 3/539    | 46/23843  | 0.085484 | 0.496742 | 0.46871 | Gdf5/Tfap2   |
| GO_BP_m3GO:005143 | regulation                 | 3/539    | 46/23843  | 0.085484 | 0.496742 | 0.46871 | Bag5/Mad     |
| GO_BP_m3GO:009010 | cochlea development        | 3/539    | 46/23843  | 0.085484 | 0.496742 | 0.46871 | Hes1/Neur    |
| GO_BP_m3GO:000182 | kidney development         | 10/539   | 269/23843 | 0.086044 | 0.496742 | 0.46871 | Bmp2/Crlf1   |
| GO_BP_m3GO:004649 | nicotinic                  | 6/539    | 135/23843 | 0.086327 | 0.496742 | 0.46871 | Dlat/Dld/Fc  |
| GO_BP_m3GO:009950 | synaptic vesicle           | 6/539    | 135/23843 | 0.086327 | 0.496742 | 0.46871 | Bcl2l1/Lrrk1 |
| GO_BP_m3GO:003528 | segmentation               | 5/539    | 104/23843 | 0.087095 | 0.496742 | 0.46871 | Axin2/Foxc   |
| GO_BP_m3GO:000032 | re-entry                   | in 1/539 | 4/23843   | 0.08741  | 0.496742 | 0.46871 | Ccnf         |
| GO_BP_m3GO:000073 | DNA catabolism             | 1/539    | 4/23843   | 0.08741  | 0.496742 | 0.46871 | Isg20        |
| GO_BP_m3GO:000208 | inhibition                 | c 1/539  | 4/23843   | 0.08741  | 0.496742 | 0.46871 | Hes1         |
| GO_BP_m3GO:000246 | tolerance                  | ir 1/539 | 4/23843   | 0.08741  | 0.496742 | 0.46871 | Aire         |
| GO_BP_m3GO:000343 | growth plate               | 1/539    | 4/23843   | 0.08741  | 0.496742 | 0.46871 | Col27a1      |
| GO_BP_m3GO:000762 | negative regulation        | 1/539    | 4/23843   | 0.08741  | 0.496742 | 0.46871 | Avp          |
| GO_BP_m3GO:000995 | epidermal                  | 1/539    | 4/23843   | 0.08741  | 0.496742 | 0.46871 | Ptch1        |
| GO_BP_m3GO:001084 | positive regulation        | 1/539    | 4/23843   | 0.08741  | 0.496742 | 0.46871 | Nlgn1        |
| GO_BP_m3GO:001608 | synaptic vesicle           | 1/539    | 4/23843   | 0.08741  | 0.496742 | 0.46871 | Nlgn1        |
| GO_BP_m3GO:001833 | protein succinyl           | 1/539    | 4/23843   | 0.08741  | 0.496742 | 0.46871 | Dld          |
| GO_BP_m3GO:002155 | midbrain                   | -f 1/539 | 4/23843   | 0.08741  | 0.496742 | 0.46871 | Hes1         |
| GO_BP_m3GO:002155 | oculomotor                 | 1/539    | 4/23843   | 0.08741  | 0.496742 | 0.46871 | Hes1         |
| GO_BP_m3GO:002191 | regulation                 | 1/539    | 4/23843   | 0.08741  | 0.496742 | 0.46871 | Nkx6-1       |

|                                     |         |         |          |         |         |
|-------------------------------------|---------|---------|----------|---------|---------|
| GO_BP_m3GO:003234negative re1/539   | 4/23843 | 0.08741 | 0.496742 | 0.46871 | Bmp2    |
| GO_BP_m3GO:003234negative re1/539   | 4/23843 | 0.08741 | 0.496742 | 0.46871 | Bmp2    |
| GO_BP_m3GO:003284positive re1/539   | 4/23843 | 0.08741 | 0.496742 | 0.46871 | Avp     |
| GO_BP_m3GO:003363positive re1/539   | 4/23843 | 0.08741 | 0.496742 | 0.46871 | Ccl5    |
| GO_BP_m3GO:003472histone H3 1/539   | 4/23843 | 0.08741 | 0.496742 | 0.46871 | Ctr9    |
| GO_BP_m3GO:00351Coperant co1/539    | 4/23843 | 0.08741 | 0.496742 | 0.46871 | Tacr1   |
| GO_BP_m3GO:00353Enegative re1/539   | 4/23843 | 0.08741 | 0.496742 | 0.46871 | Twist1  |
| GO_BP_m3GO:003547positive re1/539   | 4/23843 | 0.08741 | 0.496742 | 0.46871 | Foxc2   |
| GO_BP_m3GO:003556regulation 1/539   | 4/23843 | 0.08741 | 0.496742 | 0.46871 | Lrrk2   |
| GO_BP_m3GO:003561histone H2 1/539   | 4/23843 | 0.08741 | 0.496742 | 0.46871 | Epop    |
| GO_BP_m3GO:003566CD8-positi1/539    | 4/23843 | 0.08741 | 0.496742 | 0.46871 | Ccl5    |
| GO_BP_m3GO:003572intraciliary 1/539 | 4/23843 | 0.08741 | 0.496742 | 0.46871 | Ttc30a1 |
| GO_BP_m3GO:00359Cascending 1/539    | 4/23843 | 0.08741 | 0.496742 | 0.46871 | Hes1    |
| GO_BP_m3GO:003591ascending 1/539    | 4/23843 | 0.08741 | 0.496742 | 0.46871 | Hes1    |
| GO_BP_m3GO:00381Cnegative re1/539   | 4/23843 | 0.08741 | 0.496742 | 0.46871 | Mkks    |
| GO_BP_m3GO:00433Eregulation 1/539   | 4/23843 | 0.08741 | 0.496742 | 0.46871 | Cd46    |
| GO_BP_m3GO:00434Cglucocortic1/539   | 4/23843 | 0.08741 | 0.496742 | 0.46871 | Sgk1    |
| GO_BP_m3GO:00456Enegative re1/539   | 4/23843 | 0.08741 | 0.496742 | 0.46871 | Hes1    |
| GO_BP_m3GO:00463EGDP-L-fuc1/539     | 4/23843 | 0.08741 | 0.496742 | 0.46871 | Fuk     |
| GO_BP_m3GO:00466Cpositive re1/539   | 4/23843 | 0.08741 | 0.496742 | 0.46871 | Ranbp3l |
| GO_BP_m3GO:00468Enegative re1/539   | 4/23843 | 0.08741 | 0.496742 | 0.46871 | Ucn2    |
| GO_BP_m3GO:004862myoblast f1/539    | 4/23843 | 0.08741 | 0.496742 | 0.46871 | Myod1   |
| GO_BP_m3GO:005161negative re1/539   | 4/23843 | 0.08741 | 0.496742 | 0.46871 | Gpm6b   |
| GO_BP_m3GO:00517Cshort-chair1/539   | 4/23843 | 0.08741 | 0.496742 | 0.46871 | Thnsl2  |
| GO_BP_m3GO:006012somatotro1/539     | 4/23843 | 0.08741 | 0.496742 | 0.46871 | Ghrhr   |
| GO_BP_m3GO:006012thyroid-stir1/539  | 4/23843 | 0.08741 | 0.496742 | 0.46871 | Bmp2    |
| GO_BP_m3GO:006046prevention 1/539   | 4/23843 | 0.08741 | 0.496742 | 0.46871 | Adam24  |
| GO_BP_m3GO:006047acrosomal 1/539    | 4/23843 | 0.08741 | 0.496742 | 0.46871 | Syt6    |
| GO_BP_m3GO:006103epithelial c1/539  | 4/23843 | 0.08741 | 0.496742 | 0.46871 | Foxf1   |
| GO_BP_m3GO:00610Eregulation 1/539   | 4/23843 | 0.08741 | 0.496742 | 0.46871 | Bag5    |
| GO_BP_m3GO:00612Ccell prolifer1/539 | 4/23843 | 0.08741 | 0.496742 | 0.46871 | Bmp2    |
| GO_BP_m3GO:00700Cpositive re1/539   | 4/23843 | 0.08741 | 0.496742 | 0.46871 | Gip     |
| GO_BP_m3GO:00701Cregulation 1/539   | 4/23843 | 0.08741 | 0.496742 | 0.46871 | C1qtnf4 |
| GO_BP_m3GO:00706Cregulation 1/539   | 4/23843 | 0.08741 | 0.496742 | 0.46871 | Axin2   |
| GO_BP_m3GO:007103CUT catabol1/539   | 4/23843 | 0.08741 | 0.496742 | 0.46871 | Dis3    |
| GO_BP_m3GO:007104CUT metat1/539     | 4/23843 | 0.08741 | 0.496742 | 0.46871 | Dis3    |
| GO_BP_m3GO:00720Cglomerular1/539    | 4/23843 | 0.08741 | 0.496742 | 0.46871 | Foxc2   |
| GO_BP_m3GO:00720Ejuxtaglome1/539    | 4/23843 | 0.08741 | 0.496742 | 0.46871 | Mir330  |
| GO_BP_m3GO:007214glomerular1/539    | 4/23843 | 0.08741 | 0.496742 | 0.46871 | Foxc2   |
| GO_BP_m3GO:007216metaneph1/539      | 4/23843 | 0.08741 | 0.496742 | 0.46871 | Tcf21   |
| GO_BP_m3GO:009702mature cor1/539    | 4/23843 | 0.08741 | 0.496742 | 0.46871 | Prtn3   |
| GO_BP_m3GO:009953synaptic sig1/539  | 4/23843 | 0.08741 | 0.496742 | 0.46871 | Syt4    |
| GO_BP_m3GO:009954trans-synap1/539   | 4/23843 | 0.08741 | 0.496742 | 0.46871 | Syt4    |
| GO_BP_m3GO:010607histone suc1/539   | 4/23843 | 0.08741 | 0.496742 | 0.46871 | Dld     |
| GO_BP_m3GO:19024Cregulation 1/539   | 4/23843 | 0.08741 | 0.496742 | 0.46871 | Lrrk2   |
| GO_BP_m3GO:19033Enegative re1/539   | 4/23843 | 0.08741 | 0.496742 | 0.46871 | Bag5    |
| GO_BP_m3GO:190336protein loc1/539   | 4/23843 | 0.08741 | 0.496742 | 0.46871 | Pdzd11  |
| GO_BP_m3GO:20000Eregulation 1/539   | 4/23843 | 0.08741 | 0.496742 | 0.46871 | Axin2   |

|                                    |           |          |          |          |                |
|------------------------------------|-----------|----------|----------|----------|----------------|
| GO_BP_m3GO:200006negative re1/539  | 4/23843   | 0.08741  | 0.496742 | 0.46871  | Bmp2           |
| GO_BP_m3GO:200041regulation 1/539  | 4/23843   | 0.08741  | 0.496742 | 0.46871  | Aire           |
| GO_BP_m3GO:200050positive re1/539  | 4/23843   | 0.08741  | 0.496742 | 0.46871  | Ccl5           |
| GO_BP_m3GO:200066positive re1/539  | 4/23843   | 0.08741  | 0.496742 | 0.46871  | Prkcz          |
| GO_BP_m3GO:200098negative re1/539  | 4/23843   | 0.08741  | 0.496742 | 0.46871  | Hes1           |
| GO_BP_m3GO:200116positive re1/539  | 4/23843   | 0.08741  | 0.496742 | 0.46871  | Ctr9           |
| GO_BP_m3GO:004560positive re2/539  | 22/23843  | 0.087551 | 0.496742 | 0.46871  | Prkch/Ptch     |
| GO_BP_m3GO:005085positive re2/539  | 22/23843  | 0.087551 | 0.496742 | 0.46871  | Prkch/Usp1     |
| GO_BP_m3GO:006074mammary 2/539     | 22/23843  | 0.087551 | 0.496742 | 0.46871  | Areg/Foxf1     |
| GO_BP_m3GO:006137mammary 2/539     | 22/23843  | 0.087551 | 0.496742 | 0.46871  | Areg/Foxf1     |
| GO_BP_m3GO:190153regulation 2/539  | 22/23843  | 0.087551 | 0.496742 | 0.46871  | Ankle1/Hes1    |
| GO_BP_m3GO:000170in utero en15/539 | 450/23843 | 0.088312 | 0.500397 | 0.472159 | Bcl2l1/Bmp2    |
| GO_BP_m3GO:004870embryonic 6/539   | 136/23843 | 0.088689 | 0.501867 | 0.473547 | Foxc2/Hox1     |
| GO_BP_m3GO:004665lymphocyte11/539  | 306/23843 | 0.088995 | 0.502937 | 0.474556 | Btn1a1/Ccl5    |
| GO_BP_m3GO:000072double-str5/539   | 105/23843 | 0.089848 | 0.504463 | 0.475996 | Ccdc155/D      |
| GO_BP_m3GO:000072recombina5/539    | 105/23843 | 0.089848 | 0.504463 | 0.475996 | Ccdc155/D      |
| GO_BP_m3GO:200017regulation 5/539  | 105/23843 | 0.089848 | 0.504463 | 0.475996 | Cdon/Lrrk2     |
| GO_BP_m3GO:003233regulation 3/539  | 47/23843  | 0.089852 | 0.504463 | 0.475996 | Axin2/Gdf5     |
| GO_BP_m3GO:004848autonomic 3/539   | 47/23843  | 0.089852 | 0.504463 | 0.475996 | Hes1/Sox11     |
| GO_BP_m3GO:000176morphoge19/539    | 237/23843 | 0.09051  | 0.507496 | 0.478858 | Areg/Bmp2      |
| GO_BP_m3GO:000726neurotrans 6/539  | 137/23843 | 0.091085 | 0.508066 | 0.479396 | Bcl2l1/Lrrk1   |
| GO_BP_m3GO:001936pyridine nu6/539  | 137/23843 | 0.091085 | 0.508066 | 0.479396 | Dlat/Dld/Foxf1 |
| GO_BP_m3GO:005512digestive sy6/539 | 137/23843 | 0.091085 | 0.508066 | 0.479396 | Foxf1/Hes1     |
| GO_BP_m3GO:009964signal rele6/539  | 137/23843 | 0.091085 | 0.508066 | 0.479396 | Bcl2l1/Lrrk1   |
| GO_BP_m3GO:009874cell-cell ad7/539 | 170/23843 | 0.091859 | 0.511543 | 0.482677 | Amigo3/Brn3    |
| GO_BP_m3GO:003294mononucle11/539   | 308/23843 | 0.092091 | 0.511543 | 0.482677 | Btn1a1/Ccl5    |
| GO_BP_m3GO:005071positive re10/539 | 273/23843 | 0.0926   | 0.511543 | 0.482677 | C1qtnf4/Ex     |
| GO_BP_m3GO:005138response tr4/539  | 76/23843  | 0.09336  | 0.511543 | 0.482677 | Areg/Ghrh1     |
| GO_BP_m3GO:000738pattern spe15/539 | 454/23843 | 0.093368 | 0.511543 | 0.482677 | Axin2/Bmp2     |
| GO_BP_m3GO:000722smoothene6/539    | 138/23843 | 0.093517 | 0.511543 | 0.482677 | Cdon/Foxf1     |
| GO_BP_m3GO:000631DNA recon9/539    | 239/23843 | 0.09411  | 0.511543 | 0.482677 | Ankle1/Ccl5    |
| GO_BP_m3GO:001086positive re3/539  | 48/23843  | 0.094312 | 0.511543 | 0.482677 | Bmp2/Gdf5      |
| GO_BP_m3GO:002154cranial nen3/539  | 48/23843  | 0.094312 | 0.511543 | 0.482677 | Hes1/Neur      |
| GO_BP_m3GO:003265regulation 3/539  | 48/23843  | 0.094312 | 0.511543 | 0.482677 | Cd46/Prkcz     |
| GO_BP_m3GO:004255neuron ma3/539    | 48/23843  | 0.094312 | 0.511543 | 0.482677 | Dleu2/Lrrk1    |
| GO_BP_m3GO:000318atrioventric2/539 | 23/23843  | 0.094505 | 0.511543 | 0.482677 | Bmp2/Twis      |
| GO_BP_m3GO:003209regulation 2/539  | 23/23843  | 0.094505 | 0.511543 | 0.482677 | Mkks/Ucn       |
| GO_BP_m3GO:003580regulation 2/539  | 23/23843  | 0.094505 | 0.511543 | 0.482677 | Oxt/Tfap2k     |
| GO_BP_m3GO:004204fluid trans2/539  | 23/23843  | 0.094505 | 0.511543 | 0.482677 | Aqp5/Slc14     |
| GO_BP_m3GO:004833mesoderm 2/539    | 23/23843  | 0.094505 | 0.511543 | 0.482677 | Foxc2/Foxf1    |
| GO_BP_m3GO:005196regulation 2/539  | 23/23843  | 0.094505 | 0.511543 | 0.482677 | Avp/Chrn       |
| GO_BP_m3GO:200067positive re2/539  | 23/23843  | 0.094505 | 0.511543 | 0.482677 | Trim6/Twis     |
| GO_BP_m3GO:005158regulation 5/539  | 107/23843 | 0.095488 | 0.511543 | 0.482677 | Bcl2l1/Gpr     |
| GO_BP_m3GO:000001regulation 4/539  | 77/23843  | 0.096815 | 0.511543 | 0.482677 | Ankle1/D3      |
| GO_BP_m3GO:006135neural prec7/539  | 173/23843 | 0.098452 | 0.511543 | 0.482677 | Atf5/Cdon      |
| GO_BP_m3GO:000662protein tar6/539  | 140/23843 | 0.098484 | 0.511543 | 0.482677 | Ablim3/He      |
| GO_BP_m3GO:007200nephron de6/539   | 140/23843 | 0.098484 | 0.511543 | 0.482677 | Bmp2/Foxc      |
| GO_BP_m3GO:000725JAK-STAT r8/539   | 207/23843 | 0.098777 | 0.511543 | 0.482677 | Ccl5/Crlf1/    |

|                                     |           |          |          |          |             |
|-------------------------------------|-----------|----------|----------|----------|-------------|
| GO_BP_m3GO:003101endocrine  3/539   | 49/23843  | 0.098861 | 0.511543 | 0.482677 | Gip/Hes1/   |
| GO_BP_m3GO:00456εpositive reç3/539  | 49/23843  | 0.098861 | 0.511543 | 0.482677 | Bmp2/Hes:   |
| GO_BP_m3GO:005114negative re3/539   | 49/23843  | 0.098861 | 0.511543 | 0.482677 | Bmp2/Ctdp   |
| GO_BP_m3GO:00514çpositive reç3/539  | 49/23843  | 0.098861 | 0.511543 | 0.482677 | Nf2/Tacr1/  |
| GO_BP_m3GO:19052çnegative re3/539   | 49/23843  | 0.098861 | 0.511543 | 0.482677 | Kdm4b/Kd    |
| GO_BP_m3GO:200067regulation 3/539   | 49/23843  | 0.098861 | 0.511543 | 0.482677 | Hes1/Trimç  |
| GO_BP_m3GO:000701actin filamç13/539 | 385/23843 | 0.099494 | 0.511543 | 0.482677 | Arhgap25/   |
| GO_BP_m3GO:00140çneural cres4/539   | 78/23843  | 0.100329 | 0.511543 | 0.482677 | Foxc2/Hes:  |
| GO_BP_m3GO:007207nephron tu4/539    | 78/23843  | 0.100329 | 0.511543 | 0.482677 | Bmp2/Hes:   |
| GO_BP_m3GO:00716çanatomical 7/539   | 174/23843 | 0.100706 | 0.511543 | 0.482677 | Bmp2/Dleu   |
| GO_BP_m3GO:005164vesicle loca8/539  | 208/23843 | 0.100825 | 0.511543 | 0.482677 | Ap3s1/Bcl2  |
| GO_BP_m3GO:00990çvesicle-me 6/539   | 141/23843 | 0.101019 | 0.511543 | 0.482677 | Ap3s1/Bcl2  |
| GO_BP_m3GO:004407regulation 5/539   | 109/23843 | 0.101303 | 0.511543 | 0.482677 | Avp/Hk1/C   |
| GO_BP_m3GO:00029çresponse tr2/539   | 24/23843  | 0.101611 | 0.511543 | 0.482677 | Bcl2l1/Hk1  |
| GO_BP_m3GO:00070çmitotic G2 2/539   | 24/23843  | 0.101611 | 0.511543 | 0.482677 | Fanci/ler3  |
| GO_BP_m3GO:001404regulation 2/539   | 24/23843  | 0.101611 | 0.511543 | 0.482677 | Avp/Syt4    |
| GO_BP_m3GO:00305çmale genit:2/539   | 24/23843  | 0.101611 | 0.511543 | 0.482677 | Dhcr24/Src  |
| GO_BP_m3GO:00310çnegative re2/539   | 24/23843  | 0.101611 | 0.511543 | 0.482677 | Kdm4b/Kd    |
| GO_BP_m3GO:00336εregulation 2/539   | 24/23843  | 0.101611 | 0.511543 | 0.482677 | Bmp2/Tme    |
| GO_BP_m3GO:00355εregulation 2/539   | 24/23843  | 0.101611 | 0.511543 | 0.482677 | Kdm4d/Tur   |
| GO_BP_m3GO:00435εregulation 2/539   | 24/23843  | 0.101611 | 0.511543 | 0.482677 | Bmp2/Ghrf   |
| GO_BP_m3GO:00439çmodulator2/539     | 24/23843  | 0.101611 | 0.511543 | 0.482677 | Ccl5/Ctdp1  |
| GO_BP_m3GO:004434type B pan2/539    | 24/23843  | 0.101611 | 0.511543 | 0.482677 | Nkx6-1/Ptç  |
| GO_BP_m3GO:005157regulation 2/539   | 24/23843  | 0.101611 | 0.511543 | 0.482677 | Kdm4b/Kd    |
| GO_BP_m3GO:005231modulator2/539     | 24/23843  | 0.101611 | 0.511543 | 0.482677 | Ccl5/Ctdp1  |
| GO_BP_m3GO:005247modulator2/539     | 24/23843  | 0.101611 | 0.511543 | 0.482677 | Ccl5/Ctdp1  |
| GO_BP_m3GO:00610çpositive reç2/539  | 24/23843  | 0.101611 | 0.511543 | 0.482677 | Caprin1/Cu  |
| GO_BP_m3GO:19044çregulation 2/539   | 24/23843  | 0.101611 | 0.511543 | 0.482677 | C1qtnf4/Lr  |
| GO_BP_m3GO:19058çnegative re2/539   | 24/23843  | 0.101611 | 0.511543 | 0.482677 | Mdga1/Nlç   |
| GO_BP_m3GO:199077tumor necr2/539    | 24/23843  | 0.101611 | 0.511543 | 0.482677 | C1qtnf4/Lr  |
| GO_BP_m3GO:20007çnegative re2/539   | 24/23843  | 0.101611 | 0.511543 | 0.482677 | Hes1/Trimç  |
| GO_BP_m3GO:00071çestablishm:8/539   | 209/23843 | 0.102896 | 0.511543 | 0.482677 | Crb3/Foxf1  |
| GO_BP_m3GO:00976çSTAT casca8/539    | 209/23843 | 0.102896 | 0.511543 | 0.482677 | Ccl5/Crlf1/ |
| GO_BP_m3GO:00487çembryonic 3/539    | 50/23843  | 0.103496 | 0.511543 | 0.482677 | Foxc2/Tgfb  |
| GO_BP_m3GO:00702çnegative re3/539   | 50/23843  | 0.103496 | 0.511543 | 0.482677 | Ccl5/Mir10  |
| GO_BP_m3GO:00725çpyridine-ç6/539    | 142/23843 | 0.103588 | 0.511543 | 0.482677 | Dlat/Dld/Fç |
| GO_BP_m3GO:004864negative re5/539   | 110/23843 | 0.104276 | 0.511543 | 0.482677 | Atxn2/Ctdp  |
| GO_BP_m3GO:004521cell-cell jur8/539 | 211/23843 | 0.10711  | 0.511543 | 0.482677 | Cdh26/Crb   |
| GO_BP_m3GO:00506çcytokine se8/539   | 211/23843 | 0.10711  | 0.511543 | 0.482677 | Btn1a1/C1ç  |
| GO_BP_m3GO:19033çregulation 8/539   | 211/23843 | 0.10711  | 0.511543 | 0.482677 | Bag5/Ctr9/  |
| GO_BP_m3GO:00319çresponse tr4/539   | 80/23843  | 0.107531 | 0.511543 | 0.482677 | Areg/Ghrh   |
| GO_BP_m3GO:00720εnephron eç4/539    | 80/23843  | 0.107531 | 0.511543 | 0.482677 | Bmp2/Hes:   |
| GO_BP_m3GO:00019çintramemb1/539     | 5/23843   | 0.108044 | 0.511543 | 0.482677 | Axin2       |
| GO_BP_m3GO:000231plasma cell1/539   | 5/23843   | 0.108044 | 0.511543 | 0.482677 | Nkx2-3      |
| GO_BP_m3GO:00031çendocardia1/539    | 5/23843   | 0.108044 | 0.511543 | 0.482677 | Twist1      |
| GO_BP_m3GO:000324growth inv:1/539   | 5/23843   | 0.108044 | 0.511543 | 0.482677 | S1pr1       |
| GO_BP_m3GO:00033çnegative re1/539   | 5/23843   | 0.108044 | 0.511543 | 0.482677 | Bmp2        |
| GO_BP_m3GO:000611NADH oxic1/539     | 5/23843   | 0.108044 | 0.511543 | 0.482677 | Slc37a2     |



|                                     |         |          |          |          |          |
|-------------------------------------|---------|----------|----------|----------|----------|
| GO_BP_m3GO:000749midgut dev1/539    | 5/23843 | 0.108044 | 0.511543 | 0.482677 | Foxf1    |
| GO_BP_m3GO:000979regulation 1/539   | 5/23843 | 0.108044 | 0.511543 | 0.482677 | Hes1     |
| GO_BP_m3GO:001571hexose phc1/539    | 5/23843 | 0.108044 | 0.511543 | 0.482677 | Slc37a2  |
| GO_BP_m3GO:001576glucose-6-1/539    | 5/23843 | 0.108044 | 0.511543 | 0.482677 | Slc37a2  |
| GO_BP_m3GO:001584urea transp1/539   | 5/23843 | 0.108044 | 0.511543 | 0.482677 | Slc14a1  |
| GO_BP_m3GO:001586ATP transp1/539    | 5/23843 | 0.108044 | 0.511543 | 0.482677 | Slc25a17 |
| GO_BP_m3GO:001588folic acid tr1/539 | 5/23843 | 0.108044 | 0.511543 | 0.482677 | Slc19a1  |
| GO_BP_m3GO:003194negative re1/539   | 5/23843 | 0.108044 | 0.511543 | 0.482677 | Bmp2     |
| GO_BP_m3GO:003194negative re1/539   | 5/23843 | 0.108044 | 0.511543 | 0.482677 | Bmp2     |
| GO_BP_m3GO:003284regulation 1/539   | 5/23843 | 0.108044 | 0.511543 | 0.482677 | Avp      |
| GO_BP_m3GO:003308negative re1/539   | 5/23843 | 0.108044 | 0.511543 | 0.482677 | lhh      |
| GO_BP_m3GO:003368negative re1/539   | 5/23843 | 0.108044 | 0.511543 | 0.482677 | Ucn2     |
| GO_BP_m3GO:003548gastric emr1/539   | 5/23843 | 0.108044 | 0.511543 | 0.482677 | Ucn      |
| GO_BP_m3GO:003574natural killr1/539 | 5/23843 | 0.108044 | 0.511543 | 0.482677 | Ccl5     |
| GO_BP_m3GO:003590response tr1/539   | 5/23843 | 0.108044 | 0.511543 | 0.482677 | Ptpn5    |
| GO_BP_m3GO:003607direct ossif1/539  | 5/23843 | 0.108044 | 0.511543 | 0.482677 | Axin2    |
| GO_BP_m3GO:004337memory T 1/539     | 5/23843 | 0.108044 | 0.511543 | 0.482677 | Cd46     |
| GO_BP_m3GO:004357maintenanr1/539    | 5/23843 | 0.108044 | 0.511543 | 0.482677 | Axin2    |
| GO_BP_m3GO:004434sodium-de1/539     | 5/23843 | 0.108044 | 0.511543 | 0.482677 | Stc2     |
| GO_BP_m3GO:004544mitotic cell1/539  | 5/23843 | 0.108044 | 0.511543 | 0.482677 | Hes1     |
| GO_BP_m3GO:004598negative re1/539   | 5/23843 | 0.108044 | 0.511543 | 0.482677 | Ankle1   |
| GO_BP_m3GO:004687positive re1/539   | 5/23843 | 0.108044 | 0.511543 | 0.482677 | Tacr1    |
| GO_BP_m3GO:005090diapedesis 1/539   | 5/23843 | 0.108044 | 0.511543 | 0.482677 | Ccl5     |
| GO_BP_m3GO:005138negative re1/539   | 5/23843 | 0.108044 | 0.511543 | 0.482677 | Ptprf    |
| GO_BP_m3GO:005161regulation 1/539   | 5/23843 | 0.108044 | 0.511543 | 0.482677 | Gpm6b    |
| GO_BP_m3GO:005196negative re1/539   | 5/23843 | 0.108044 | 0.511543 | 0.482677 | Mdga1    |
| GO_BP_m3GO:005218modulator1/539     | 5/23843 | 0.108044 | 0.511543 | 0.482677 | Bcl2l1   |
| GO_BP_m3GO:006008smooth m1/539      | 5/23843 | 0.108044 | 0.511543 | 0.482677 | Tacr1    |
| GO_BP_m3GO:006016positive re1/539   | 5/23843 | 0.108044 | 0.511543 | 0.482677 | Lrrk2    |
| GO_BP_m3GO:006016regulation 1/539   | 5/23843 | 0.108044 | 0.511543 | 0.482677 | Hes1     |
| GO_BP_m3GO:006050chondrobl1/539     | 5/23843 | 0.108044 | 0.511543 | 0.482677 | Gdf5     |
| GO_BP_m3GO:006075epithelial c1/539  | 5/23843 | 0.108044 | 0.511543 | 0.482677 | Areg     |
| GO_BP_m3GO:006104regulation 1/539   | 5/23843 | 0.108044 | 0.511543 | 0.482677 | Foxc2    |
| GO_BP_m3GO:006176CAMKK-A1/539       | 5/23843 | 0.108044 | 0.511543 | 0.482677 | Lrrk2    |
| GO_BP_m3GO:007094dephosphc1/539     | 5/23843 | 0.108044 | 0.511543 | 0.482677 | Ctdp1    |
| GO_BP_m3GO:007105polyadenyl1/539    | 5/23843 | 0.108044 | 0.511543 | 0.482677 | Exosc6   |
| GO_BP_m3GO:007128cellular res1/539  | 5/23843 | 0.108044 | 0.511543 | 0.482677 | Lrrk2    |
| GO_BP_m3GO:007200mesangial 1/539    | 5/23843 | 0.108044 | 0.511543 | 0.482677 | Foxc2    |
| GO_BP_m3GO:007214mesangial 1/539    | 5/23843 | 0.108044 | 0.511543 | 0.482677 | Foxc2    |
| GO_BP_m3GO:007265maintenanr1/539    | 5/23843 | 0.108044 | 0.511543 | 0.482677 | Hk1      |
| GO_BP_m3GO:009071immunolo1/539      | 5/23843 | 0.108044 | 0.511543 | 0.482677 | Cd46     |
| GO_BP_m3GO:009071immunolo1/539      | 5/23843 | 0.108044 | 0.511543 | 0.482677 | Cd46     |
| GO_BP_m3GO:009917regulation 1/539   | 5/23843 | 0.108044 | 0.511543 | 0.482677 | Nlgn1    |
| GO_BP_m3GO:190167nucleotide 1/539   | 5/23843 | 0.108044 | 0.511543 | 0.482677 | Slc25a17 |
| GO_BP_m3GO:190230regulation 1/539   | 5/23843 | 0.108044 | 0.511543 | 0.482677 | Dusp26   |
| GO_BP_m3GO:190247positive re1/539   | 5/23843 | 0.108044 | 0.511543 | 0.482677 | Nlgn1    |
| GO_BP_m3GO:190321negative re1/539   | 5/23843 | 0.108044 | 0.511543 | 0.482677 | Lrrk2    |
| GO_BP_m3GO:190336positive re1/539   | 5/23843 | 0.108044 | 0.511543 | 0.482677 | Ucn      |

|                                |        |           |          |          |          |             |
|--------------------------------|--------|-----------|----------|----------|----------|-------------|
| GO_BP_m3GO:19050C positive re  | 1/539  | 5/23843   | 0.108044 | 0.511543 | 0.482677 | Tgfbr1      |
| GO_BP_m3GO:200027 regulation   | 1/539  | 5/23843   | 0.108044 | 0.511543 | 0.482677 | Twist1      |
| GO_BP_m3GO:20003C negative re  | 1/539  | 5/23843   | 0.108044 | 0.511543 | 0.482677 | Syt4        |
| GO_BP_m3GO:20005C regulation   | 1/539  | 5/23843   | 0.108044 | 0.511543 | 0.482677 | Ccl5        |
| GO_BP_m3GO:200081 regulation   | 1/539  | 5/23843   | 0.108044 | 0.511543 | 0.482677 | Carmil2     |
| GO_BP_m3GO:200097 regulation   | 1/539  | 5/23843   | 0.108044 | 0.511543 | 0.482677 | Hes1        |
| GO_BP_m3GO:20009E positive re  | 1/539  | 5/23843   | 0.108044 | 0.511543 | 0.482677 | Ucn         |
| GO_BP_m3GO:20010E positive re  | 1/539  | 5/23843   | 0.108044 | 0.511543 | 0.482677 | Kdm4d       |
| GO_BP_m3GO:20011E regulation   | 1/539  | 5/23843   | 0.108044 | 0.511543 | 0.482677 | Ctr9        |
| GO_BP_m3GO:20011E positive re  | 1/539  | 5/23843   | 0.108044 | 0.511543 | 0.482677 | Prkc        |
| GO_BP_m3GO:00018E retina hom   | 3/539  | 51/23843  | 0.108216 | 0.511543 | 0.482677 | Mkks/Nxn    |
| GO_BP_m3GO:003261 interleukin  | 3/539  | 51/23843  | 0.108216 | 0.511543 | 0.482677 | Cd46/Prkc   |
| GO_BP_m3GO:00350E establishm   | 3/539  | 51/23843  | 0.108216 | 0.511543 | 0.482677 | Crb3/Foxf1  |
| GO_BP_m3GO:00456C regulation   | 3/539  | 51/23843  | 0.108216 | 0.511543 | 0.482677 | Hes1/Prkc   |
| GO_BP_m3GO:00469C regulation   | 3/539  | 51/23843  | 0.108216 | 0.511543 | 0.482677 | Bcl2l1/Ier3 |
| GO_BP_m3GO:006124 establishm   | 3/539  | 51/23843  | 0.108216 | 0.511543 | 0.482677 | Crb3/Foxf1  |
| GO_BP_m3GO:00148E phasic smc   | 2/539  | 25/23843  | 0.108859 | 0.511543 | 0.482677 | Neurog1/T   |
| GO_BP_m3GO:00321C regulation   | 2/539  | 25/23843  | 0.108859 | 0.511543 | 0.482677 | Mkks/Ucn    |
| GO_BP_m3GO:00321C regulation   | 2/539  | 25/23843  | 0.108859 | 0.511543 | 0.482677 | Mkks/Ucn    |
| GO_BP_m3GO:00455E regulation   | 2/539  | 25/23843  | 0.108859 | 0.511543 | 0.482677 | Cd46/Carr   |
| GO_BP_m3GO:004864 negative re  | 2/539  | 25/23843  | 0.108859 | 0.511543 | 0.482677 | Tsc22d3/Tv  |
| GO_BP_m3GO:00607E regulation   | 2/539  | 25/23843  | 0.108859 | 0.511543 | 0.482677 | Kdm5d/Tcf   |
| GO_BP_m3GO:00712E cellular res | 2/539  | 25/23843  | 0.108859 | 0.511543 | 0.482677 | Mir539/Mir  |
| GO_BP_m3GO:00800E response tr  | 2/539  | 25/23843  | 0.108859 | 0.511543 | 0.482677 | Mir539/Mir  |
| GO_BP_m3GO:00230E signal rele  | 15/539 | 466/23843 | 0.109605 | 0.514487 | 0.485454 | Bcl2l1/Ccl5 |
| GO_BP_m3GO:001574 organophc    | 4/539  | 81/23843  | 0.111217 | 0.520347 | 0.490984 | Slc25a17/S  |
| GO_BP_m3GO:00480E regulation   | 4/539  | 81/23843  | 0.111217 | 0.520347 | 0.490984 | Celf5/Khdr  |
| GO_BP_m3GO:00720E nephron m    | 4/539  | 81/23843  | 0.111217 | 0.520347 | 0.490984 | Bmp2/Hes    |
| GO_BP_m3GO:190331 regulation   | 8/539  | 213/23843 | 0.111417 | 0.520715 | 0.491331 | Axin2/Celf  |
| GO_BP_m3GO:000761 mating       | 3/539  | 52/23843  | 0.113018 | 0.520973 | 0.491574 | Avp/Oxt/Ta  |
| GO_BP_m3GO:004577 positive re  | 3/539  | 52/23843  | 0.113018 | 0.520973 | 0.491574 | Avp/Oxt/Ta  |
| GO_BP_m3GO:00459E positive re  | 3/539  | 52/23843  | 0.113018 | 0.520973 | 0.491574 | Oxt/Tacr1/  |
| GO_BP_m3GO:007267 T cell migr  | 3/539  | 52/23843  | 0.113018 | 0.520973 | 0.491574 | Aire/Ccl5/S |
| GO_BP_m3GO:00086E apoptotic r  | 5/539  | 113/23843 | 0.113449 | 0.520973 | 0.491574 | Avp/Bcl2l1  |
| GO_BP_m3GO:00220E metenceph    | 5/539  | 113/23843 | 0.113449 | 0.520973 | 0.491574 | Atxn2/Dixd  |
| GO_BP_m3GO:00706E leukocyte r  | 11/539 | 321/23843 | 0.113786 | 0.520973 | 0.491574 | Btn1a1/Ccl  |
| GO_BP_m3GO:00514E negative re  | 6/539  | 146/23843 | 0.114201 | 0.520973 | 0.491574 | Ccnf/Ckap   |
| GO_BP_m3GO:00995E presynaptic  | 6/539  | 146/23843 | 0.114201 | 0.520973 | 0.491574 | Bcl2l1/Lrrk |
| GO_BP_m3GO:00020E chondrocyt   | 2/539  | 26/23843  | 0.116239 | 0.520973 | 0.491574 | Axin2/Col2  |
| GO_BP_m3GO:000317 atrioventric | 2/539  | 26/23843  | 0.116239 | 0.520973 | 0.491574 | Bmp2/Twis   |
| GO_BP_m3GO:00067E NADH met     | 2/539  | 26/23843  | 0.116239 | 0.520973 | 0.491574 | Hk1/Slc37a  |
| GO_BP_m3GO:00161E snRNA pro    | 2/539  | 26/23843  | 0.116239 | 0.520973 | 0.491574 | Exosc6/Ints |
| GO_BP_m3GO:003081 positive re  | 2/539  | 26/23843  | 0.116239 | 0.520973 | 0.491574 | Avp/Rln3    |
| GO_BP_m3GO:00427E positive re  | 2/539  | 26/23843  | 0.116239 | 0.520973 | 0.491574 | Ghrhr/Nlgr  |
| GO_BP_m3GO:00515E negative re  | 2/539  | 26/23843  | 0.116239 | 0.520973 | 0.491574 | Gpm6b/Sy    |
| GO_BP_m3GO:00519E positive re  | 2/539  | 26/23843  | 0.116239 | 0.520973 | 0.491574 | Avp/Syt4    |
| GO_BP_m3GO:006071 labyrinthin  | 2/539  | 26/23843  | 0.116239 | 0.520973 | 0.491574 | Esx1/Hes1   |
| GO_BP_m3GO:006091 heart form   | 2/539  | 26/23843  | 0.116239 | 0.520973 | 0.491574 | Axin2/Hes1  |

|                   |              |        |           |          |          |          |              |
|-------------------|--------------|--------|-----------|----------|----------|----------|--------------|
| GO_BP_m3GO:006103 | negative re  | 2/539  | 26/23843  | 0.116239 | 0.520973 | 0.491574 | Gdf5/Tgfb    |
| GO_BP_m3GO:007135 | cellular res | 2/539  | 26/23843  | 0.116239 | 0.520973 | 0.491574 | C1qtnf4/Ct   |
| GO_BP_m3GO:200077 | positive re  | 2/539  | 26/23843  | 0.116239 | 0.520973 | 0.491574 | C1qtnf4/Tv   |
| GO_BP_m3GO:001657 | protein det  | 5/539  | 114/23843 | 0.11659  | 0.520973 | 0.491574 | Epop/Otuc    |
| GO_BP_m3GO:002154 | pallium de   | 6/539  | 147/23843 | 0.116937 | 0.520973 | 0.491574 | Atat1/Cdor   |
| GO_BP_m3GO:004253 | positive re  | 3/539  | 53/23843  | 0.1179   | 0.520973 | 0.491574 | Ccl5/Crlf1/  |
| GO_BP_m3GO:001403 | mesenchyr    | 4/539  | 83/23843  | 0.118756 | 0.520973 | 0.491574 | Foxc2/Hes1   |
| GO_BP_m3GO:003275 | positive re  | 4/539  | 83/23843  | 0.118756 | 0.520973 | 0.491574 | C1qtnf4/Il1  |
| GO_BP_m3GO:000688 | exocytosis   | 11/539 | 324/23843 | 0.119175 | 0.520973 | 0.491574 | Abr/Bcl2l1/  |
| GO_BP_m3GO:004875 | branching    | 17/539 | 182/23843 | 0.119738 | 0.520973 | 0.491574 | Areg/Bmp2    |
| GO_BP_m3GO:000693 | regulation   | 6/539  | 149/23843 | 0.122506 | 0.520973 | 0.491574 | Chrn4/Ox     |
| GO_BP_m3GO:004886 | stem cell d  | 4/539  | 84/23843  | 0.122606 | 0.520973 | 0.491574 | Foxc2/Hes1   |
| GO_BP_m3GO:005080 | negative re  | 4/539  | 84/23843  | 0.122606 | 0.520973 | 0.491574 | Bcl2l1/Grik  |
| GO_BP_m3GO:006133 | renal tubul  | 4/539  | 84/23843  | 0.122606 | 0.520973 | 0.491574 | Bmp2/Hes1    |
| GO_BP_m3GO:009706 | dendritic s  | 4/539  | 84/23843  | 0.122606 | 0.520973 | 0.491574 | Caprin1/Cu   |
| GO_BP_m3GO:003646 | synaptic ve  | 3/539  | 54/23843  | 0.122859 | 0.520973 | 0.491574 | Bcl2l1/Lrrk1 |
| GO_BP_m3GO:004507 | negative re  | 3/539  | 54/23843  | 0.122859 | 0.520973 | 0.491574 | Ccl5/Isg20/  |
| GO_BP_m3GO:004854 | response tr  | 9/539  | 254/23843 | 0.123714 | 0.520973 | 0.491574 | Areg/Ghrh    |
| GO_BP_m3GO:003368 | osteoblast   | 2/539  | 27/23843  | 0.123741 | 0.520973 | 0.491574 | Bmp2/Tme     |
| GO_BP_m3GO:003466 | ncRNA cat    | 2/539  | 27/23843  | 0.123741 | 0.520973 | 0.491574 | Dis3/Exosc   |
| GO_BP_m3GO:003533 | peptidyl-ty  | 2/539  | 27/23843  | 0.123741 | 0.520973 | 0.491574 | Ptpn5/Ptp    |
| GO_BP_m3GO:003600 | positive re  | 2/539  | 27/23843  | 0.123741 | 0.520973 | 0.491574 | Hsf4/Klf2    |
| GO_BP_m3GO:007023 | negative re  | 2/539  | 27/23843  | 0.123741 | 0.520973 | 0.491574 | Ccl5/Tsc22   |
| GO_BP_m3GO:009010 | cochlea mc   | 2/539  | 27/23843  | 0.123741 | 0.520973 | 0.491574 | Neurog1/T    |
| GO_BP_m3GO:009031 | positive re  | 2/539  | 27/23843  | 0.123741 | 0.520973 | 0.491574 | Jdp2/Lrrk2   |
| GO_BP_m3GO:190289 | positive re  | 2/539  | 27/23843  | 0.123741 | 0.520973 | 0.491574 | Bmp2/Tgfb    |
| GO_BP_m3GO:006113 | morphoge     | 8/539  | 219/23843 | 0.124894 | 0.520973 | 0.491574 | Areg/Bmp2    |
| GO_BP_m3GO:001715 | calcium io   | 5/539  | 117/23843 | 0.126257 | 0.520973 | 0.491574 | Bcl2l1/Lrrk1 |
| GO_BP_m3GO:004671 | acid secret  | 5/539  | 117/23843 | 0.126257 | 0.520973 | 0.491574 | Avp/Oxt/Sy   |
| GO_BP_m3GO:000270 | positive re  | 4/539  | 85/23843  | 0.126508 | 0.520973 | 0.491574 | Exosc6/HK1   |
| GO_BP_m3GO:001071 | regulation   | 4/539  | 85/23843  | 0.126508 | 0.520973 | 0.491574 | Axin2/Bmp    |
| GO_BP_m3GO:001403 | neural cres  | 4/539  | 85/23843  | 0.126508 | 0.520973 | 0.491574 | Foxc2/Hes1   |
| GO_BP_m3GO:004568 | regulation   | 4/539  | 85/23843  | 0.126508 | 0.520973 | 0.491574 | Atf5/Bmp2    |
| GO_BP_m3GO:006039 | SMAD prot    | 4/539  | 85/23843  | 0.126508 | 0.520973 | 0.491574 | Bmp2/Gdf     |
| GO_BP_m3GO:006041 | muscle tiss  | 4/539  | 85/23843  | 0.126508 | 0.520973 | 0.491574 | Bmp2/Foxc    |
| GO_BP_m3GO:000228 | lymphocyt    | 7/539  | 185/23843 | 0.127322 | 0.520973 | 0.491574 | Cd46/Exos    |
| GO_BP_m3GO:000038 | alternative  | 3/539  | 55/23843  | 0.127892 | 0.520973 | 0.491574 | Celf5/Mbnl   |
| GO_BP_m3GO:006035 | endochonc    | 3/539  | 55/23843  | 0.127892 | 0.520973 | 0.491574 | Axin2/Col2   |
| GO_BP_m3GO:006197 | replacemer   | 3/539  | 55/23843  | 0.127892 | 0.520973 | 0.491574 | Axin2/Col2   |
| GO_BP_m3GO:200077 | regulation   | 3/539  | 55/23843  | 0.127892 | 0.520973 | 0.491574 | D330045A1    |
| GO_BP_m3GO:004666 | male sex di  | 6/539  | 151/23843 | 0.128205 | 0.520973 | 0.491574 | Bcl2l1/Dhc   |
| GO_BP_m3GO:000001 | regulation   | 1/539  | 6/23843   | 0.128212 | 0.520973 | 0.491574 | Ankle1       |
| GO_BP_m3GO:000016 | phosphore    | 1/539  | 6/23843   | 0.128212 | 0.520973 | 0.491574 | Kcnh3        |
| GO_BP_m3GO:000245 | T cell antig | 1/539  | 6/23843   | 0.128212 | 0.520973 | 0.491574 | Kdm5d        |
| GO_BP_m3GO:000251 | tolerance ir | 1/539  | 6/23843   | 0.128212 | 0.520973 | 0.491574 | Aire         |
| GO_BP_m3GO:000327 | apoptotic    | 1/539  | 6/23843   | 0.128212 | 0.520973 | 0.491574 | Foxc2        |
| GO_BP_m3GO:000340 | retinal pigr | 1/539  | 6/23843   | 0.128212 | 0.520973 | 0.491574 | Ihh          |
| GO_BP_m3GO:000341 | growth pla   | 1/539  | 6/23843   | 0.128212 | 0.520973 | 0.491574 | Col27a1      |

|                                     |         |          |          |          |          |
|-------------------------------------|---------|----------|----------|----------|----------|
| GO_BP_m3GO:000343chondrocyt1/539    | 6/23843 | 0.128212 | 0.520973 | 0.491574 | Col27a1  |
| GO_BP_m3GO:000636terminator1/539    | 6/23843 | 0.128212 | 0.520973 | 0.491574 | Dmtf1    |
| GO_BP_m3GO:000666sphingomy1/539     | 6/23843 | 0.128212 | 0.520973 | 0.491574 | Enpp7    |
| GO_BP_m3GO:000670androgen t1/539    | 6/23843 | 0.128212 | 0.520973 | 0.491574 | Srd5a1   |
| GO_BP_m3GO:000719adenylate c1/539   | 6/23843 | 0.128212 | 0.520973 | 0.491574 | Grm4     |
| GO_BP_m3GO:001062negative re1/539   | 6/23843 | 0.128212 | 0.520973 | 0.491574 | Sox10    |
| GO_BP_m3GO:001070positive re1/539   | 6/23843 | 0.128212 | 0.520973 | 0.491574 | Oxt      |
| GO_BP_m3GO:001084regulation 1/539   | 6/23843 | 0.128212 | 0.520973 | 0.491574 | Nlgn1    |
| GO_BP_m3GO:001404negative re1/539   | 6/23843 | 0.128212 | 0.520973 | 0.491574 | Dleu2    |
| GO_BP_m3GO:001719N-terminal1/539    | 6/23843 | 0.128212 | 0.520973 | 0.491574 | Naa25    |
| GO_BP_m3GO:002186forebrain v1/539   | 6/23843 | 0.128212 | 0.520973 | 0.491574 | Dixdc1   |
| GO_BP_m3GO:003032transepithe1/539   | 6/23843 | 0.128212 | 0.520973 | 0.491574 | P2ry6    |
| GO_BP_m3GO:003133negative re1/539   | 6/23843 | 0.128212 | 0.520973 | 0.491574 | Syt4     |
| GO_BP_m3GO:003133positive re1/539   | 6/23843 | 0.128212 | 0.520973 | 0.491574 | Avp      |
| GO_BP_m3GO:003308negative re1/539   | 6/23843 | 0.128212 | 0.520973 | 0.491574 | Ihh      |
| GO_BP_m3GO:003318positive re1/539   | 6/23843 | 0.128212 | 0.520973 | 0.491574 | Ctr9     |
| GO_BP_m3GO:003411positive re1/539   | 6/23843 | 0.128212 | 0.520973 | 0.491574 | Ccl5     |
| GO_BP_m3GO:003461response tr1/539   | 6/23843 | 0.128212 | 0.520973 | 0.491574 | Klf2     |
| GO_BP_m3GO:003475regulation 1/539   | 6/23843 | 0.128212 | 0.520973 | 0.491574 | Hamp2    |
| GO_BP_m3GO:003573intraciliary 1/539 | 6/23843 | 0.128212 | 0.520973 | 0.491574 | Cep131   |
| GO_BP_m3GO:003820TORC2 sign1/539    | 6/23843 | 0.128212 | 0.520973 | 0.491574 | Prr5     |
| GO_BP_m3GO:004269thelarche 1/539    | 6/23843 | 0.128212 | 0.520973 | 0.491574 | Areg     |
| GO_BP_m3GO:004274circadian sl1/539  | 6/23843 | 0.128212 | 0.520973 | 0.491574 | Nlgn1    |
| GO_BP_m3GO:004279snRNA trar1/539    | 6/23843 | 0.128212 | 0.520973 | 0.491574 | Snopc1   |
| GO_BP_m3GO:004330negative re1/539   | 6/23843 | 0.128212 | 0.520973 | 0.491574 | Foxf1    |
| GO_BP_m3GO:004341positive re1/539   | 6/23843 | 0.128212 | 0.520973 | 0.491574 | Myod1    |
| GO_BP_m3GO:004350mitochond1/539     | 6/23843 | 0.128212 | 0.520973 | 0.491574 | Mgme1    |
| GO_BP_m3GO:004453modulator1/539     | 6/23843 | 0.128212 | 0.520973 | 0.491574 | Bcl2l1   |
| GO_BP_m3GO:004453modulator1/539     | 6/23843 | 0.128212 | 0.520973 | 0.491574 | Bcl2l1   |
| GO_BP_m3GO:004453long-chain1/539    | 6/23843 | 0.128212 | 0.520973 | 0.491574 | Slc27a4  |
| GO_BP_m3GO:004516clustering c1/539  | 6/23843 | 0.128212 | 0.520973 | 0.491574 | Scdt1    |
| GO_BP_m3GO:004592positive re1/539   | 6/23843 | 0.128212 | 0.520973 | 0.491574 | Oxt      |
| GO_BP_m3GO:004885diencephal1/539    | 6/23843 | 0.128212 | 0.520973 | 0.491574 | Otx1     |
| GO_BP_m3GO:005158negative re1/539   | 6/23843 | 0.128212 | 0.520973 | 0.491574 | Gpm6b    |
| GO_BP_m3GO:005161serotonin t1/539   | 6/23843 | 0.128212 | 0.520973 | 0.491574 | Gpm6b    |
| GO_BP_m3GO:005204modulator1/539     | 6/23843 | 0.128212 | 0.520973 | 0.491574 | Bcl2l1   |
| GO_BP_m3GO:005224modulator1/539     | 6/23843 | 0.128212 | 0.520973 | 0.491574 | Bcl2l1   |
| GO_BP_m3GO:005243modulator1/539     | 6/23843 | 0.128212 | 0.520973 | 0.491574 | Bcl2l1   |
| GO_BP_m3GO:006074mammary 1/539      | 6/23843 | 0.128212 | 0.520973 | 0.491574 | Areg     |
| GO_BP_m3GO:006075branch eloi1/539   | 6/23843 | 0.128212 | 0.520973 | 0.491574 | Areg     |
| GO_BP_m3GO:006140positive re1/539   | 6/23843 | 0.128212 | 0.520973 | 0.491574 | Hsf4     |
| GO_BP_m3GO:006162glycolytic p1/539  | 6/23843 | 0.128212 | 0.520973 | 0.491574 | Hk1      |
| GO_BP_m3GO:007023negative re1/539   | 6/23843 | 0.128212 | 0.520973 | 0.491574 | Tsc22d3  |
| GO_BP_m3GO:007030lens fiber c1/539  | 6/23843 | 0.128212 | 0.520973 | 0.491574 | Cryaa    |
| GO_BP_m3GO:007094regulation 1/539   | 6/23843 | 0.128212 | 0.520973 | 0.491574 | Dnase1l3 |
| GO_BP_m3GO:007149cellular res1/539  | 6/23843 | 0.128212 | 0.520973 | 0.491574 | Klf2     |
| GO_BP_m3GO:007183apoptotic p1/539   | 6/23843 | 0.128212 | 0.520973 | 0.491574 | Bcl2l1   |
| GO_BP_m3GO:007204comma-sh1/539      | 6/23843 | 0.128212 | 0.520973 | 0.491574 | Hes1     |

|                                              |           |          |          |          |              |
|----------------------------------------------|-----------|----------|----------|----------|--------------|
| GO_BP_m3GO:00721Cglomerulus1/539             | 6/23843   | 0.128212 | 0.520973 | 0.491574 | Tcf21        |
| GO_BP_m3GO:00721Cglomerular1/539             | 6/23843   | 0.128212 | 0.520973 | 0.491574 | Tcf21        |
| GO_BP_m3GO:00725Eterminal bud1/539           | 6/23843   | 0.128212 | 0.520973 | 0.491574 | Nlgn1        |
| GO_BP_m3GO:007261interleukin1/539            | 6/23843   | 0.128212 | 0.520973 | 0.491574 | Prkc         |
| GO_BP_m3GO:007267thymocyte1/539              | 6/23843   | 0.128212 | 0.520973 | 0.491574 | Aire         |
| GO_BP_m3GO:00900Enegative regulation1/539    | 6/23843   | 0.128212 | 0.520973 | 0.491574 | Bmp2         |
| GO_BP_m3GO:00905Cendocardia1/539             | 6/23843   | 0.128212 | 0.520973 | 0.491574 | Twist1       |
| GO_BP_m3GO:009711NMDA glutamate1/539         | 6/23843   | 0.128212 | 0.520973 | 0.491574 | Nlgn1        |
| GO_BP_m3GO:19002Epositive regulation1/539    | 6/23843   | 0.128212 | 0.520973 | 0.491574 | Atat1        |
| GO_BP_m3GO:19017Epositive regulation1/539    | 6/23843   | 0.128212 | 0.520973 | 0.491574 | Lrrk2        |
| GO_BP_m3GO:190247regulation1/539             | 6/23843   | 0.128212 | 0.520973 | 0.491574 | Nlgn1        |
| GO_BP_m3GO:19028Cnegative regulation1/539    | 6/23843   | 0.128212 | 0.520973 | 0.491574 | Syt4         |
| GO_BP_m3GO:19042Epericyte cell1/539          | 6/23843   | 0.128212 | 0.520973 | 0.491574 | Foxc2        |
| GO_BP_m3GO:19050Cregulation1/539             | 6/23843   | 0.128212 | 0.520973 | 0.491574 | Tgfbr1       |
| GO_BP_m3GO:20000Eregulation1/539             | 6/23843   | 0.128212 | 0.520973 | 0.491574 | Bmp2         |
| GO_BP_m3GO:200011negative regulation1/539    | 6/23843   | 0.128212 | 0.520973 | 0.491574 | Ccl5         |
| GO_BP_m3GO:20005Epositive regulation1/539    | 6/23843   | 0.128212 | 0.520973 | 0.491574 | Prkc         |
| GO_BP_m3GO:20005Eregulation1/539             | 6/23843   | 0.128212 | 0.520973 | 0.491574 | BC048507     |
| GO_BP_m3GO:20005Epositive regulation1/539    | 6/23843   | 0.128212 | 0.520973 | 0.491574 | BC048507     |
| GO_BP_m3GO:20006Epositive regulation1/539    | 6/23843   | 0.128212 | 0.520973 | 0.491574 | Prkc         |
| GO_BP_m3GO:20006Eregulation1/539             | 6/23843   | 0.128212 | 0.520973 | 0.491574 | Prkc         |
| GO_BP_m3GO:200067negative regulation1/539    | 6/23843   | 0.128212 | 0.520973 | 0.491574 | Crlf1        |
| GO_BP_m3GO:20012Epositive regulation1/539    | 6/23843   | 0.128212 | 0.520973 | 0.491574 | Avp          |
| GO_BP_m3GO:00506Eregulation5/539             | 118/23843 | 0.12956  | 0.525953 | 0.496273 | Cellf5/Ctr9/ |
| GO_BP_m3GO:00331Eregulation6/539             | 152/23843 | 0.131101 | 0.528745 | 0.498908 | Avp/Fnip2/   |
| GO_BP_m3GO:00022Epositive regulation2/539    | 28/23843  | 0.131355 | 0.528745 | 0.498908 | Ccl5/Trim6   |
| GO_BP_m3GO:00216Ecerebellar cortex2/539      | 28/23843  | 0.131355 | 0.528745 | 0.498908 | Atxn2/Whr    |
| GO_BP_m3GO:00331Eregulation2/539             | 28/23843  | 0.131355 | 0.528745 | 0.498908 | Lrrk2/Ptpn1  |
| GO_BP_m3GO:00450Eregulatory2/539             | 28/23843  | 0.131355 | 0.528745 | 0.498908 | Cd46/Carr    |
| GO_BP_m3GO:004591negative regulation2/539    | 28/23843  | 0.131355 | 0.528745 | 0.498908 | Ankle1/D3/   |
| GO_BP_m3GO:00606Eregulation2/539             | 28/23843  | 0.131355 | 0.528745 | 0.498908 | 1110004E0    |
| GO_BP_m3GO:007074response to2/539            | 28/23843  | 0.131355 | 0.528745 | 0.498908 | C1qtnf4/Ct   |
| GO_BP_m3GO:190002regulation2/539             | 28/23843  | 0.131355 | 0.528745 | 0.498908 | Nlgn1/Carr   |
| GO_BP_m3GO:00301Eextracellular matrix8/539   | 222/23843 | 0.131939 | 0.530598 | 0.500656 | Adamts14/    |
| GO_BP_m3GO:00000Eprotein import3/539         | 56/23843  | 0.132998 | 0.532362 | 0.502321 | Lrrk2/Ptpn1  |
| GO_BP_m3GO:00020Eglandular epithelium3/539   | 56/23843  | 0.132998 | 0.532362 | 0.502321 | Bmp2/Hes1    |
| GO_BP_m3GO:002151ventral spiracle3/539       | 56/23843  | 0.132998 | 0.532362 | 0.502321 | Mir19a/Nk    |
| GO_BP_m3GO:002157hindbrain region3/539       | 56/23843  | 0.132998 | 0.532362 | 0.502321 | Atxn2/Hes1   |
| GO_BP_m3GO:004512cellular extension3/539     | 56/23843  | 0.132998 | 0.532362 | 0.502321 | Abr/Ccl5/P   |
| GO_BP_m3GO:00507Cregulation14/539            | 444/23843 | 0.133687 | 0.532552 | 0.5025   | Btn1a1/C1c   |
| GO_BP_m3GO:00067Eoxidoreduction6/539         | 153/23843 | 0.134028 | 0.532552 | 0.5025   | Dlat/Dld/Fc  |
| GO_BP_m3GO:00459Epositive regulation6/539    | 153/23843 | 0.134028 | 0.532552 | 0.5025   | Hes1/Mad2    |
| GO_BP_m3GO:010602neuron projection4/539      | 87/23843  | 0.134468 | 0.532552 | 0.5025   | Caprin1/Cu   |
| GO_BP_m3GO:000227myeloid leucocyte7/539      | 188/23843 | 0.135142 | 0.532552 | 0.5025   | Abr/Ccl5/D   |
| GO_BP_m3GO:00309Cforebrain development12/539 | 370/23843 | 0.135819 | 0.532552 | 0.5025   | Atat1/Atf5/  |
| GO_BP_m3GO:00016Eurogenital system11/539     | 333/23843 | 0.136188 | 0.532552 | 0.5025   | Bmp2/Crlf1   |
| GO_BP_m3GO:190121negative regulation8/539    | 224/23843 | 0.136747 | 0.532552 | 0.5025   | Bcl2l1/Ccl5  |
| GO_BP_m3GO:19019Enegative regulation6/539    | 154/23843 | 0.136987 | 0.532552 | 0.5025   | Atf5/Fanci/  |

|                                      |           |          |          |        |             |
|--------------------------------------|-----------|----------|----------|--------|-------------|
| GO_BP_m3GO:00063C double-str. 7/539  | 189/23843 | 0.1378   | 0.532552 | 0.5025 | Ccdc155/D   |
| GO_BP_m3GO:00104E mesenchym 3/539    | 57/23843  | 0.138173 | 0.532552 | 0.5025 | Bmp2/Foxf   |
| GO_BP_m3GO:004311 receptor cl 3/539  | 57/23843  | 0.138173 | 0.532552 | 0.5025 | Grik2/Nlgn  |
| GO_BP_m3GO:00455E positive re 4/539  | 88/23843  | 0.138523 | 0.532552 | 0.5025 | Cd46/Ihh/F  |
| GO_BP_m3GO:00609E regulation 4/539   | 88/23843  | 0.138523 | 0.532552 | 0.5025 | Caprin1/Cu  |
| GO_BP_m3GO:000922 nucleotide 2/539   | 29/23843  | 0.139074 | 0.532552 | 0.5025 | Fuk/Pmm1    |
| GO_BP_m3GO:00103E histone mc 2/539   | 29/23843  | 0.139074 | 0.532552 | 0.5025 | Ctr9/Uhrf1  |
| GO_BP_m3GO:00342E negative re 2/539  | 29/23843  | 0.139074 | 0.532552 | 0.5025 | Lrrk2/Mkks  |
| GO_BP_m3GO:004864 positive re 2/539  | 29/23843  | 0.139074 | 0.532552 | 0.5025 | Cdon/Myo    |
| GO_BP_m3GO:00610E positive re 2/539  | 29/23843  | 0.139074 | 0.532552 | 0.5025 | Bmp2/Gdf    |
| GO_BP_m3GO:00703C lens fiber c 2/539 | 29/23843  | 0.139074 | 0.532552 | 0.5025 | Cryaa/Nf2   |
| GO_BP_m3GO:00181C peptidyl-tr 5/539  | 121/23843 | 0.139697 | 0.532552 | 0.5025 | Hk1/Lrrk2/  |
| GO_BP_m3GO:00017C cell fate sp 4/539 | 89/23843  | 0.142626 | 0.532552 | 0.5025 | Cdon/Ihh/I  |
| GO_BP_m3GO:000751 skeletal m 7/539   | 191/23843 | 0.143192 | 0.532552 | 0.5025 | Cdon/Myo    |
| GO_BP_m3GO:00028E regulation 3/539   | 58/23843  | 0.143416 | 0.532552 | 0.5025 | Abr/Dnase   |
| GO_BP_m3GO:00071E heterophili 3/539  | 58/23843  | 0.143416 | 0.532552 | 0.5025 | Amigo3/Cr   |
| GO_BP_m3GO:00322E positive re 3/539  | 58/23843  | 0.143416 | 0.532552 | 0.5025 | Nf2/Tacr1/  |
| GO_BP_m3GO:00328E glomerulus 3/539   | 58/23843  | 0.143416 | 0.532552 | 0.5025 | Foxc2/Hes   |
| GO_BP_m3GO:00504E regulation 3/539   | 58/23843  | 0.143416 | 0.532552 | 0.5025 | Chrna4/Ox   |
| GO_BP_m3GO:19033C positive re 3/539  | 58/23843  | 0.143416 | 0.532552 | 0.5025 | Bcl2l1/Nlgr |
| GO_BP_m3GO:19037E positive re 3/539  | 58/23843  | 0.143416 | 0.532552 | 0.5025 | Avp/Oxt/Sy  |
| GO_BP_m3GO:00096E response tr 11/539 | 337/23843 | 0.144147 | 0.532552 | 0.5025 | Ankzf1/Bcl  |
| GO_BP_m3GO:00508C synapse or 11/539  | 337/23843 | 0.144147 | 0.532552 | 0.5025 | 2610042L0   |
| GO_BP_m3GO:005087 regulation 11/539  | 337/23843 | 0.144147 | 0.532552 | 0.5025 | Aqp5/Avp/   |
| GO_BP_m3GO:000244 production 10/539  | 300/23843 | 0.144327 | 0.532552 | 0.5025 | Exosc6/Hk   |
| GO_BP_m3GO:00072E spermatog 15/539   | 489/23843 | 0.145176 | 0.532552 | 0.5025 | Adam24/A    |
| GO_BP_m3GO:00216C cranial nen 2/539  | 30/23843  | 0.146888 | 0.532552 | 0.5025 | Neurog1/T   |
| GO_BP_m3GO:00329E positive re 2/539  | 30/23843  | 0.146888 | 0.532552 | 0.5025 | Ihh/Ucn     |
| GO_BP_m3GO:00439E positive re 2/539  | 30/23843  | 0.146888 | 0.532552 | 0.5025 | Gip/Ucn     |
| GO_BP_m3GO:004431 wound hea 2/539    | 30/23843  | 0.146888 | 0.532552 | 0.5025 | Plet1/Carr  |
| GO_BP_m3GO:005507 potassium 2/539    | 30/23843  | 0.146888 | 0.532552 | 0.5025 | Slc12a7/Tf  |
| GO_BP_m3GO:00605E apoptotic r 2/539  | 30/23843  | 0.146888 | 0.532552 | 0.5025 | Cryaa/Foxc  |
| GO_BP_m3GO:00905C epiboly inv 2/539  | 30/23843  | 0.146888 | 0.532552 | 0.5025 | Plet1/Carr  |
| GO_BP_m3GO:00426E muscle cell 12/539 | 376/23843 | 0.147171 | 0.532552 | 0.5025 | Bmp2/Cdo    |
| GO_BP_m3GO:00019E blood vess 1/539   | 7/23843   | 0.147924 | 0.532552 | 0.5025 | S1pr1       |
| GO_BP_m3GO:00020C regulation 1/539   | 7/23843   | 0.147924 | 0.532552 | 0.5025 | Ndst2       |
| GO_BP_m3GO:00026E negative re 1/539  | 7/23843   | 0.147924 | 0.532552 | 0.5025 | Abr         |
| GO_BP_m3GO:000312 heart induc 1/539  | 7/23843   | 0.147924 | 0.532552 | 0.5025 | Bmp2        |
| GO_BP_m3GO:000317 aortic valve 1/539 | 7/23843   | 0.147924 | 0.532552 | 0.5025 | Twist1      |
| GO_BP_m3GO:00031E aortic valve 1/539 | 7/23843   | 0.147924 | 0.532552 | 0.5025 | Twist1      |
| GO_BP_m3GO:00032E cardiac net 1/539  | 7/23843   | 0.147924 | 0.532552 | 0.5025 | Twist1      |
| GO_BP_m3GO:00033C regulation 1/539   | 7/23843   | 0.147924 | 0.532552 | 0.5025 | Bmp2        |
| GO_BP_m3GO:000337 sphingosin 1/539   | 7/23843   | 0.147924 | 0.532552 | 0.5025 | S1pr1       |
| GO_BP_m3GO:00062E DNA topol 1/539    | 7/23843   | 0.147924 | 0.532552 | 0.5025 | Top3b       |
| GO_BP_m3GO:00065E threonine r 1/539  | 7/23843   | 0.147924 | 0.532552 | 0.5025 | Thnsl2      |
| GO_BP_m3GO:000661 ribosomal j 1/539  | 7/23843   | 0.147924 | 0.532552 | 0.5025 | Tnpo2       |
| GO_BP_m3GO:000702 tubulin cor 1/539  | 7/23843   | 0.147924 | 0.532552 | 0.5025 | Cryaa       |
| GO_BP_m3GO:000721 tachykinin 1/539   | 7/23843   | 0.147924 | 0.532552 | 0.5025 | Tacr1       |

|                                    |         |          |          |        |          |
|------------------------------------|---------|----------|----------|--------|----------|
| GO_BP_m3GO:000924protein lipc1/539 | 7/23843 | 0.147924 | 0.532552 | 0.5025 | Gcsh     |
| GO_BP_m3GO:000969phenylproç1/539   | 7/23843 | 0.147924 | 0.532552 | 0.5025 | Ugt1a7c  |
| GO_BP_m3GO:000980coumarin r1/539   | 7/23843 | 0.147924 | 0.532552 | 0.5025 | Ugt1a7c  |
| GO_BP_m3GO:000991auditory re1/539  | 7/23843 | 0.147924 | 0.532552 | 0.5025 | Hes1     |
| GO_BP_m3GO:001062regulation 1/539  | 7/23843 | 0.147924 | 0.532552 | 0.5025 | Sox10    |
| GO_BP_m3GO:001096regulation 1/539  | 7/23843 | 0.147924 | 0.532552 | 0.5025 | Stc2     |
| GO_BP_m3GO:001481skeletal mu1/539  | 7/23843 | 0.147924 | 0.532552 | 0.5025 | Cdon     |
| GO_BP_m3GO:001936fatty acid e1/539 | 7/23843 | 0.147924 | 0.532552 | 0.5025 | Elovl2   |
| GO_BP_m3GO:001936fatty acid e1/539 | 7/23843 | 0.147924 | 0.532552 | 0.5025 | Elovl2   |
| GO_BP_m3GO:001967GDP-manr1/539     | 7/23843 | 0.147924 | 0.532552 | 0.5025 | Pmm1     |
| GO_BP_m3GO:003111tRNA pseu1/539    | 7/23843 | 0.147924 | 0.532552 | 0.5025 | Rpusd3   |
| GO_BP_m3GO:003234regulation 1/539  | 7/23843 | 0.147924 | 0.532552 | 0.5025 | Bmp2     |
| GO_BP_m3GO:003280lacrimal gla1/539 | 7/23843 | 0.147924 | 0.532552 | 0.5025 | Sox10    |
| GO_BP_m3GO:003300negative re1/539  | 7/23843 | 0.147924 | 0.532552 | 0.5025 | Foxf1    |
| GO_BP_m3GO:003331meiotic cel1/539  | 7/23843 | 0.147924 | 0.532552 | 0.5025 | Oraov1   |
| GO_BP_m3GO:003362positive reç1/539 | 7/23843 | 0.147924 | 0.532552 | 0.5025 | Foxc2    |
| GO_BP_m3GO:003462fatty acid e1/539 | 7/23843 | 0.147924 | 0.532552 | 0.5025 | Elovl2   |
| GO_BP_m3GO:003462fatty acid e1/539 | 7/23843 | 0.147924 | 0.532552 | 0.5025 | Elovl2   |
| GO_BP_m3GO:003472histone H31/539   | 7/23843 | 0.147924 | 0.532552 | 0.5025 | Kdm5d    |
| GO_BP_m3GO:003533long-chain1/539   | 7/23843 | 0.147924 | 0.532552 | 0.5025 | Them4    |
| GO_BP_m3GO:003558sequesterir1/539  | 7/23843 | 0.147924 | 0.532552 | 0.5025 | Cd46     |
| GO_BP_m3GO:004435macropino1/539    | 7/23843 | 0.147924 | 0.532552 | 0.5025 | Mapkapk3 |
| GO_BP_m3GO:004500DNA deam1/539     | 7/23843 | 0.147924 | 0.532552 | 0.5025 | Exosc6   |
| GO_BP_m3GO:004563positive reç1/539 | 7/23843 | 0.147924 | 0.532552 | 0.5025 | Prkc2    |
| GO_BP_m3GO:004591negative re1/539  | 7/23843 | 0.147924 | 0.532552 | 0.5025 | Cd46     |
| GO_BP_m3GO:004806eye pigmer1/539   | 7/23843 | 0.147924 | 0.532552 | 0.5025 | Ihh      |
| GO_BP_m3GO:005086positive reç1/539 | 7/23843 | 0.147924 | 0.532552 | 0.5025 | Prkch    |
| GO_BP_m3GO:005146positive reç1/539 | 7/23843 | 0.147924 | 0.532552 | 0.5025 | Ucn      |
| GO_BP_m3GO:005197negative re1/539  | 7/23843 | 0.147924 | 0.532552 | 0.5025 | Avp      |
| GO_BP_m3GO:006001parathyroic1/539  | 7/23843 | 0.147924 | 0.532552 | 0.5025 | Tgfbr1   |
| GO_BP_m3GO:006012inner ear rç1/539 | 7/23843 | 0.147924 | 0.532552 | 0.5025 | Hes1     |
| GO_BP_m3GO:006029regulation 1/539  | 7/23843 | 0.147924 | 0.532552 | 0.5025 | Mkks     |
| GO_BP_m3GO:006029regulation 1/539  | 7/23843 | 0.147924 | 0.532552 | 0.5025 | Mkks     |
| GO_BP_m3GO:006046negative re1/539  | 7/23843 | 0.147924 | 0.532552 | 0.5025 | Adam24   |
| GO_BP_m3GO:006050Type I pnet1/539  | 7/23843 | 0.147924 | 0.532552 | 0.5025 | Klf2     |
| GO_BP_m3GO:006075positive reç1/539 | 7/23843 | 0.147924 | 0.532552 | 0.5025 | Ccl5     |
| GO_BP_m3GO:006097angiogene1/539    | 7/23843 | 0.147924 | 0.532552 | 0.5025 | Tgfbr1   |
| GO_BP_m3GO:006143renal syste1/539  | 7/23843 | 0.147924 | 0.532552 | 0.5025 | Tcf21    |
| GO_BP_m3GO:006143kidney vasc1/539  | 7/23843 | 0.147924 | 0.532552 | 0.5025 | Tcf21    |
| GO_BP_m3GO:007014response tr1/539  | 7/23843 | 0.147924 | 0.532552 | 0.5025 | Cryaa    |
| GO_BP_m3GO:007099NADPH oxi1/539    | 7/23843 | 0.147924 | 0.532552 | 0.5025 | Fdx1     |
| GO_BP_m3GO:007205S-shaped k1/539   | 7/23843 | 0.147924 | 0.532552 | 0.5025 | Hes1     |
| GO_BP_m3GO:007216mesenchyr1/539    | 7/23843 | 0.147924 | 0.532552 | 0.5025 | Tcf21    |
| GO_BP_m3GO:007228metaneph1/539     | 7/23843 | 0.147924 | 0.532552 | 0.5025 | Hes1     |
| GO_BP_m3GO:007260interleukin1/539  | 7/23843 | 0.147924 | 0.532552 | 0.5025 | Prkc2    |
| GO_BP_m3GO:009026positive reç1/539 | 7/23843 | 0.147924 | 0.532552 | 0.5025 | Mad211   |
| GO_BP_m3GO:009900calmodulin1/539   | 7/23843 | 0.147924 | 0.532552 | 0.5025 | Lrrk2    |
| GO_BP_m3GO:190004positive reç1/539 | 7/23843 | 0.147924 | 0.532552 | 0.5025 | Carmil2  |

|                                     |           |          |          |          |             |
|-------------------------------------|-----------|----------|----------|----------|-------------|
| GO_BP_m3GO:190102negative re1/539   | 7/23843   | 0.147924 | 0.532552 | 0.5025   | Ier3        |
| GO_BP_m3GO:190153negative re1/539   | 7/23843   | 0.147924 | 0.532552 | 0.5025   | Hes1        |
| GO_BP_m3GO:190172regulation 1/539   | 7/23843   | 0.147924 | 0.532552 | 0.5025   | Lrrk2       |
| GO_BP_m3GO:190201regulation 1/539   | 7/23843   | 0.147924 | 0.532552 | 0.5025   | Mkks        |
| GO_BP_m3GO:190233negative re1/539   | 7/23843   | 0.147924 | 0.532552 | 0.5025   | Foxc2       |
| GO_BP_m3GO:190302negative re1/539   | 7/23843   | 0.147924 | 0.532552 | 0.5025   | Hes1        |
| GO_BP_m3GO:190335response tr1/539   | 7/23843   | 0.147924 | 0.532552 | 0.5025   | Lrrk2       |
| GO_BP_m3GO:190335cellular res1/539  | 7/23843   | 0.147924 | 0.532552 | 0.5025   | Lrrk2       |
| GO_BP_m3GO:190398positive re1/539   | 7/23843   | 0.147924 | 0.532552 | 0.5025   | Lrrk2       |
| GO_BP_m3GO:200025negative re1/539   | 7/23843   | 0.147924 | 0.532552 | 0.5025   | Cd46        |
| GO_BP_m3GO:200057positive re1/539   | 7/23843   | 0.147924 | 0.532552 | 0.5025   | BC048507    |
| GO_BP_m3GO:200065regulation 1/539   | 7/23843   | 0.147924 | 0.532552 | 0.5025   | Ctr9        |
| GO_BP_m3GO:200066regulation 1/539   | 7/23843   | 0.147924 | 0.532552 | 0.5025   | Prkcz       |
| GO_BP_m3GO:200097regulation 1/539   | 7/23843   | 0.147924 | 0.532552 | 0.5025   | Hes1        |
| GO_BP_m3GO:200101mesenchym1/539     | 7/23843   | 0.147924 | 0.532552 | 0.5025   | Tcf21       |
| GO_BP_m3GO:005165establishm7/539    | 193/23843 | 0.148685 | 0.534533 | 0.504369 | Ap3s1/Bcl2  |
| GO_BP_m3GO:004584positive re3/539   | 59/23843  | 0.148723 | 0.534533 | 0.504369 | Neurog1/R   |
| GO_BP_m3GO:003466ncRNA me14/539     | 453/23843 | 0.149143 | 0.535594 | 0.505371 | Trmo/Dis3/  |
| GO_BP_m3GO:003103actomyosin7/539    | 194/23843 | 0.151468 | 0.543486 | 0.512817 | Mkks/Mybl   |
| GO_BP_m3GO:003433cell junctio8/539  | 230/23843 | 0.151689 | 0.543825 | 0.513137 | Cdh26/Crb   |
| GO_BP_m3GO:005101actin filame6/539  | 159/23843 | 0.152228 | 0.545305 | 0.514533 | Mkks/Nf2l   |
| GO_BP_m3GO:003238regulation 13/539  | 417/23843 | 0.153101 | 0.546492 | 0.515653 | Ablim3/Bcl  |
| GO_BP_m3GO:002151cell differer3/539 | 60/23843  | 0.154093 | 0.546492 | 0.515653 | Mir19a/Nk   |
| GO_BP_m3GO:004477mitotic DN3/539    | 60/23843  | 0.154093 | 0.546492 | 0.515653 | Fanci/Ier3/ |
| GO_BP_m3GO:006093positive re3/539   | 60/23843  | 0.154093 | 0.546492 | 0.515653 | Caprin1/Ct  |
| GO_BP_m3GO:007147cellular res3/539  | 60/23843  | 0.154093 | 0.546492 | 0.515653 | Bcl2l1/Kdm  |
| GO_BP_m3GO:004642regulation 7/539   | 195/23843 | 0.154275 | 0.546492 | 0.515653 | Ccl5/Crlf1/ |
| GO_BP_m3GO:000308regulation 2/539   | 31/23843  | 0.154789 | 0.546492 | 0.515653 | Ndst2/Tacr  |
| GO_BP_m3GO:001071positive re2/539   | 31/23843  | 0.154789 | 0.546492 | 0.515653 | Ihh/Ucn     |
| GO_BP_m3GO:003336secretory g2/539   | 31/23843  | 0.154789 | 0.546492 | 0.515653 | Ptprn/Syt4  |
| GO_BP_m3GO:004274regulation 2/539   | 31/23843  | 0.154789 | 0.546492 | 0.515653 | Ghrhr/Nlgr  |
| GO_BP_m3GO:004362ncRNA 3'-ε2/539    | 31/23843  | 0.154789 | 0.546492 | 0.515653 | Exosc6/Ints |
| GO_BP_m3GO:004824sperm cap2/539     | 31/23843  | 0.154789 | 0.546492 | 0.515653 | Catsper4/C  |
| GO_BP_m3GO:005143positive re2/539   | 31/23843  | 0.154789 | 0.546492 | 0.515653 | Nlgn1/Tgft  |
| GO_BP_m3GO:009007relaxation c2/539  | 31/23843  | 0.154789 | 0.546492 | 0.515653 | Neurog1/T   |
| GO_BP_m3GO:009050epiboly 2/539      | 31/23843  | 0.154789 | 0.546492 | 0.515653 | Plet1/Carr  |
| GO_BP_m3GO:000202regulation 4/539   | 92/23843  | 0.155217 | 0.546492 | 0.515653 | Nkain3/Prs  |
| GO_BP_m3GO:005183membrane 4/539     | 92/23843  | 0.155217 | 0.546492 | 0.515653 | Catsper4/C  |
| GO_BP_m3GO:005501cardiac mu4/539    | 92/23843  | 0.155217 | 0.546492 | 0.515653 | Ctdp1/Foxc  |
| GO_BP_m3GO:004327negative re6/539   | 160/23843 | 0.155364 | 0.546492 | 0.515653 | Gpm6b/Ha    |
| GO_BP_m3GO:001715regulation 7/539   | 196/23843 | 0.157106 | 0.546492 | 0.515653 | Abr/Bcl2l1/ |
| GO_BP_m3GO:000270regulation 5/539   | 126/23843 | 0.15733  | 0.546492 | 0.515653 | Exosc6/HK   |
| GO_BP_m3GO:000703mitotic cell 5/539 | 126/23843 | 0.15733  | 0.546492 | 0.515653 | Bcl2l1/Fanc |
| GO_BP_m3GO:190165cellular res5/539  | 126/23843 | 0.15733  | 0.546492 | 0.515653 | Fdx1/Mir10  |
| GO_BP_m3GO:003475cellular hor4/539  | 93/23843  | 0.159504 | 0.546492 | 0.515653 | Bmp2/Lcn5   |
| GO_BP_m3GO:004864muscle org4/539    | 93/23843  | 0.159504 | 0.546492 | 0.515653 | Bmp2/Foxc   |
| GO_BP_m3GO:190274regulation 4/539   | 93/23843  | 0.159504 | 0.546492 | 0.515653 | Atf5/Fanci/ |
| GO_BP_m3GO:004338positive re3/539   | 61/23843  | 0.159524 | 0.546492 | 0.515653 | Hes1/Trim6  |



|                                     |           |          |          |          |              |
|-------------------------------------|-----------|----------|----------|----------|--------------|
| GO_BP_m3GO:004566regulation 3/539   | 61/23843  | 0.159524 | 0.546492 | 0.515653 | Cdon/Myo     |
| GO_BP_m3GO:004662regulation 3/539   | 61/23843  | 0.159524 | 0.546492 | 0.515653 | Prkcz/Ptpre  |
| GO_BP_m3GO:005043catecholam 3/539   | 61/23843  | 0.159524 | 0.546492 | 0.515653 | Chrna4/Ox    |
| GO_BP_m3GO:006039regulation 3/539   | 61/23843  | 0.159524 | 0.546492 | 0.515653 | Bmp2/Gdff    |
| GO_BP_m3GO:009055regulation 3/539   | 61/23843  | 0.159524 | 0.546492 | 0.515653 | Bcl2l1/Ier3, |
| GO_BP_m3GO:200102negative re3/539   | 61/23843  | 0.159524 | 0.546492 | 0.515653 | Bcl2l1/D33   |
| GO_BP_m3GO:190489regulation 7/539   | 197/23843 | 0.159961 | 0.546492 | 0.515653 | Ccl5/Crlf1/  |
| GO_BP_m3GO:006157actin filame6/539  | 162/23843 | 0.161721 | 0.546492 | 0.515653 | Mkks/Nf2/I   |
| GO_BP_m3GO:000003very long-c2/539   | 32/23843  | 0.16277  | 0.546492 | 0.515653 | Elovl2/Slc2  |
| GO_BP_m3GO:000244neutrophil 2/539   | 32/23843  | 0.16277  | 0.546492 | 0.515653 | Abr/Dnase    |
| GO_BP_m3GO:000608acetyl-CoA2/539    | 32/23843  | 0.16277  | 0.546492 | 0.515653 | Dlat/Dld     |
| GO_BP_m3GO:000630DNA catab2/539     | 32/23843  | 0.16277  | 0.546492 | 0.515653 | Dnase1l3/l:  |
| GO_BP_m3GO:002241circadian sl2/539  | 32/23843  | 0.16277  | 0.546492 | 0.515653 | Ghrhr/Nlgr   |
| GO_BP_m3GO:003273positive reç2/539  | 32/23843  | 0.16277  | 0.546492 | 0.515653 | Cd46/Prkcz   |
| GO_BP_m3GO:003588enteroendc2/539    | 32/23843  | 0.16277  | 0.546492 | 0.515653 | Hes1/Nkx6    |
| GO_BP_m3GO:006079cell fate co 2/539 | 32/23843  | 0.16277  | 0.546492 | 0.515653 | Ctr9/Foxc2   |
| GO_BP_m3GO:008015regulation 2/539   | 32/23843  | 0.16277  | 0.546492 | 0.515653 | Adam24/Fa    |
| GO_BP_m3GO:008502extracellula2/539  | 32/23843  | 0.16277  | 0.546492 | 0.515653 | Gpm6b/Ihf    |
| GO_BP_m3GO:190342regulation 2/539   | 32/23843  | 0.16277  | 0.546492 | 0.515653 | Dleu2/Lrrk:  |
| GO_BP_m3GO:004209T cell prolif7/539 | 198/23843 | 0.162839 | 0.546492 | 0.515653 | Btn1a1/Ccl   |
| GO_BP_m3GO:001584monoamin 4/539     | 94/23843  | 0.163833 | 0.546492 | 0.515653 | Chrna4/Gp    |
| GO_BP_m3GO:004559regulation 5/539   | 128/23843 | 0.164628 | 0.546492 | 0.515653 | Atat1/Bmp    |
| GO_BP_m3GO:200125negative re5/539   | 128/23843 | 0.164628 | 0.546492 | 0.515653 | Gnl3l/Kdm:   |
| GO_BP_m3GO:190054regulation 6/539   | 163/23843 | 0.16494  | 0.546492 | 0.515653 | Avp/Bcl2l1,  |
| GO_BP_m3GO:000183release of c3/539  | 62/23843  | 0.165011 | 0.546492 | 0.515653 | Avp/Bcl2l1,  |
| GO_BP_m3GO:000267regulation 3/539   | 62/23843  | 0.165011 | 0.546492 | 0.515653 | Ccl5/Cd46/   |
| GO_BP_m3GO:002169cerebellar c3/539  | 62/23843  | 0.165011 | 0.546492 | 0.515653 | Atxn2/Dixd   |
| GO_BP_m3GO:200017positive reç3/539  | 62/23843  | 0.165011 | 0.546492 | 0.515653 | Cdon/Disp.   |
| GO_BP_m3GO:000182inner cell n1/539  | 8/23843   | 0.167192 | 0.546492 | 0.515653 | Ctr9         |
| GO_BP_m3GO:000203brain renin 1/539  | 8/23843   | 0.167192 | 0.546492 | 0.515653 | Tacr1        |
| GO_BP_m3GO:000551detection c1/539   | 8/23843   | 0.167192 | 0.546492 | 0.515653 | Kcnmb4       |
| GO_BP_m3GO:000636transcriptic1/539  | 8/23843   | 0.167192 | 0.546492 | 0.515653 | Dmtf1        |
| GO_BP_m3GO:001021maintenanç1/539    | 8/23843   | 0.167192 | 0.546492 | 0.515653 | Uhrf1        |
| GO_BP_m3GO:001060regulation 1/539   | 8/23843   | 0.167192 | 0.546492 | 0.515653 | Atxn2        |
| GO_BP_m3GO:001567carbon dio1/539    | 8/23843   | 0.167192 | 0.546492 | 0.515653 | Aqp5         |
| GO_BP_m3GO:001809protein pol1/539   | 8/23843   | 0.167192 | 0.546492 | 0.515653 | Ttl4         |
| GO_BP_m3GO:001922neuronal a1/539    | 8/23843   | 0.167192 | 0.546492 | 0.515653 | Clcn1        |
| GO_BP_m3GO:002186forebrain r:1/539  | 8/23843   | 0.167192 | 0.546492 | 0.515653 | Hes1         |
| GO_BP_m3GO:003112snoRNA 3':1/539    | 8/23843   | 0.167192 | 0.546492 | 0.515653 | Exosc6       |
| GO_BP_m3GO:003139regulation 1/539   | 8/23843   | 0.167192 | 0.546492 | 0.515653 | Avp          |
| GO_BP_m3GO:003144negative re1/539   | 8/23843   | 0.167192 | 0.546492 | 0.515653 | Ctr9         |
| GO_BP_m3GO:003194regulation 1/539   | 8/23843   | 0.167192 | 0.546492 | 0.515653 | Bmp2         |
| GO_BP_m3GO:003227negative re1/539   | 8/23843   | 0.167192 | 0.546492 | 0.515653 | Ucn2         |
| GO_BP_m3GO:003234regulation 1/539   | 8/23843   | 0.167192 | 0.546492 | 0.515653 | Bmp2         |
| GO_BP_m3GO:003363regulation 1/539   | 8/23843   | 0.167192 | 0.546492 | 0.515653 | Ccl5         |
| GO_BP_m3GO:003368regulation 1/539   | 8/23843   | 0.167192 | 0.546492 | 0.515653 | Ucn2         |
| GO_BP_m3GO:003447U4 snRNA 1/539     | 8/23843   | 0.167192 | 0.546492 | 0.515653 | Exosc6       |
| GO_BP_m3GO:003465cortisol bio1/539  | 8/23843   | 0.167192 | 0.546492 | 0.515653 | Bmp2         |

|                                     |           |          |          |          |            |
|-------------------------------------|-----------|----------|----------|----------|------------|
| GO_BP_m3GO:003548gastric moti1/539  | 8/23843   | 0.167192 | 0.546492 | 0.515653 | Ucn        |
| GO_BP_m3GO:003581negative re1/539   | 8/23843   | 0.167192 | 0.546492 | 0.515653 | Oxt        |
| GO_BP_m3GO:004276very long-c1/539   | 8/23843   | 0.167192 | 0.546492 | 0.515653 | Slc27a4    |
| GO_BP_m3GO:004279snRNA trar1/539    | 8/23843   | 0.167192 | 0.546492 | 0.515653 | Snopc1     |
| GO_BP_m3GO:004303negative re1/539   | 8/23843   | 0.167192 | 0.546492 | 0.515653 | Tff2       |
| GO_BP_m3GO:004331regulation 1/539   | 8/23843   | 0.167192 | 0.546492 | 0.515653 | Abr        |
| GO_BP_m3GO:004433Wnt signali1/539   | 8/23843   | 0.167192 | 0.546492 | 0.515653 | Axin2      |
| GO_BP_m3GO:004438negative re1/539   | 8/23843   | 0.167192 | 0.546492 | 0.515653 | Dusp26     |
| GO_BP_m3GO:004482meiotic telc1/539  | 8/23843   | 0.167192 | 0.546492 | 0.515653 | Ankle1     |
| GO_BP_m3GO:004688regulation 1/539   | 8/23843   | 0.167192 | 0.546492 | 0.515653 | Ucn2       |
| GO_BP_m3GO:004874positive re1/539   | 8/23843   | 0.167192 | 0.546492 | 0.515653 | Myod1      |
| GO_BP_m3GO:005145regulation 1/539   | 8/23843   | 0.167192 | 0.546492 | 0.515653 | Ucn        |
| GO_BP_m3GO:006005embryonic 1/539    | 8/23843   | 0.167192 | 0.546492 | 0.515653 | Cdon       |
| GO_BP_m3GO:006036cranial sutu1/539  | 8/23843   | 0.167192 | 0.546492 | 0.515653 | Twist1     |
| GO_BP_m3GO:006075regulation 1/539   | 8/23843   | 0.167192 | 0.546492 | 0.515653 | Ccl5       |
| GO_BP_m3GO:006100negative re1/539   | 8/23843   | 0.167192 | 0.546492 | 0.515653 | Nlgn1      |
| GO_BP_m3GO:006104vascular wc1/539   | 8/23843   | 0.167192 | 0.546492 | 0.515653 | Foxc2      |
| GO_BP_m3GO:006105negative re1/539   | 8/23843   | 0.167192 | 0.546492 | 0.515653 | Ctdp1      |
| GO_BP_m3GO:006162pharyngeal1/539    | 8/23843   | 0.167192 | 0.546492 | 0.515653 | Hes1       |
| GO_BP_m3GO:007019meiotic att1/539   | 8/23843   | 0.167192 | 0.546492 | 0.515653 | Ankle1     |
| GO_BP_m3GO:007223metaneph1/539      | 8/23843   | 0.167192 | 0.546492 | 0.515653 | Tcf21      |
| GO_BP_m3GO:009023positive re1/539   | 8/23843   | 0.167192 | 0.546492 | 0.515653 | Mad211     |
| GO_BP_m3GO:009711AMPA glut1/539     | 8/23843   | 0.167192 | 0.546492 | 0.515653 | Nlgn1      |
| GO_BP_m3GO:009724chromosor1/539     | 8/23843   | 0.167192 | 0.546492 | 0.515653 | Ankle1     |
| GO_BP_m3GO:009884protein tra1/539   | 8/23843   | 0.167192 | 0.546492 | 0.515653 | Cep131     |
| GO_BP_m3GO:009887action pote1/539   | 8/23843   | 0.167192 | 0.546492 | 0.515653 | Cln1       |
| GO_BP_m3GO:009911microtubul1/539    | 8/23843   | 0.167192 | 0.546492 | 0.515653 | Cep131     |
| GO_BP_m3GO:190011extracellula1/539  | 8/23843   | 0.167192 | 0.546492 | 0.515653 | Cd46       |
| GO_BP_m3GO:190011extracellula1/539  | 8/23843   | 0.167192 | 0.546492 | 0.515653 | Cd46       |
| GO_BP_m3GO:190036negative re1/539   | 8/23843   | 0.167192 | 0.546492 | 0.515653 | Ctr9       |
| GO_BP_m3GO:190301positive re1/539   | 8/23843   | 0.167192 | 0.546492 | 0.515653 | Tmem119    |
| GO_BP_m3GO:190336regulation 1/539   | 8/23843   | 0.167192 | 0.546492 | 0.515653 | Ucn        |
| GO_BP_m3GO:190374negative re1/539   | 8/23843   | 0.167192 | 0.546492 | 0.515653 | Lrrk2      |
| GO_BP_m3GO:190417positive re1/539   | 8/23843   | 0.167192 | 0.546492 | 0.515653 | Mir103-2   |
| GO_BP_m3GO:190474negative re1/539   | 8/23843   | 0.167192 | 0.546492 | 0.515653 | Foxc2      |
| GO_BP_m3GO:199050dense core1/539    | 8/23843   | 0.167192 | 0.546492 | 0.515653 | Syt4       |
| GO_BP_m3GO:200017regulation 1/539   | 8/23843   | 0.167192 | 0.546492 | 0.515653 | Lrrk2      |
| GO_BP_m3GO:200048negative re1/539   | 8/23843   | 0.167192 | 0.546492 | 0.515653 | Prkar1b    |
| GO_BP_m3GO:200082regulation 1/539   | 8/23843   | 0.167192 | 0.546492 | 0.515653 | Ucn        |
| GO_BP_m3GO:200127regulation 1/539   | 8/23843   | 0.167192 | 0.546492 | 0.515653 | Avp        |
| GO_BP_m3GO:004212regulation 6/539   | 164/23843 | 0.168187 | 0.548551 | 0.517596 | Btn1a1/Ccl |
| GO_BP_m3GO:000979axis specifir4/539 | 95/23843  | 0.168205 | 0.548551 | 0.517596 | Axin2/Neu1 |
| GO_BP_m3GO:003164regulation 4/539   | 95/23843  | 0.168205 | 0.548551 | 0.517596 | Avp/Chrnb  |
| GO_BP_m3GO:006053skeletal mu7/539   | 200/23843 | 0.168665 | 0.549632 | 0.518616 | Cdon/Myo   |
| GO_BP_m3GO:000165branching 3/539    | 63/23843  | 0.170554 | 0.55372  | 0.522474 | Bmp2/Ptch  |
| GO_BP_m3GO:003003lamellipodi3/539   | 63/23843  | 0.170554 | 0.55372  | 0.522474 | Ablim3/Cal |
| GO_BP_m3GO:009730cellular res3/539  | 63/23843  | 0.170554 | 0.55372  | 0.522474 | Mir362/P2r |
| GO_BP_m3GO:000761mating beh2/539    | 33/23843  | 0.170822 | 0.55372  | 0.522474 | Avp/Oxt    |

|                                     |           |          |          |          |             |
|-------------------------------------|-----------|----------|----------|----------|-------------|
| GO_BP_m3GO:001404glutamate :2/539   | 33/23843  | 0.170822 | 0.55372  | 0.522474 | Avp/Syt4    |
| GO_BP_m3GO:00216εcerebellar l2/539  | 33/23843  | 0.170822 | 0.55372  | 0.522474 | Atxn2/Whr   |
| GO_BP_m3GO:00434C skeletal m2/539   | 33/23843  | 0.170822 | 0.55372  | 0.522474 | Myod1/My    |
| GO_BP_m3GO:003001establishm15/539   | 130/23843 | 0.172058 | 0.556887 | 0.525461 | Crb3/Foxf1  |
| GO_BP_m3GO:003267regulation 5/539   | 130/23843 | 0.172058 | 0.556887 | 0.525461 | C1qtnf4/Il1 |
| GO_BP_m3GO:00024εT cell medi4/539   | 96/23843  | 0.172618 | 0.557439 | 0.525983 | Aire/Cd46/  |
| GO_BP_m3GO:003031flagellated 4/539  | 96/23843  | 0.172618 | 0.557439 | 0.525983 | Catsper4/C  |
| GO_BP_m3GO:00421C positive reç4/539 | 96/23843  | 0.172618 | 0.557439 | 0.525983 | Ccl5/Cd46/  |
| GO_BP_m3GO:004244hormone n7/539     | 202/23843 | 0.174581 | 0.561597 | 0.529906 | Bmp2/Fdx1   |
| GO_BP_m3GO:00076εfeeding be 5/539   | 131/23843 | 0.175821 | 0.561597 | 0.529906 | Adm2/Helt   |
| GO_BP_m3GO:00017C mesoderm 3/539    | 64/23843  | 0.176149 | 0.561597 | 0.529906 | Foxc2/Foxf  |
| GO_BP_m3GO:00217εhippocamç3/539     | 64/23843  | 0.176149 | 0.561597 | 0.529906 | Atat1/Mkks  |
| GO_BP_m3GO:003081positive reç3/539  | 64/23843  | 0.176149 | 0.561597 | 0.529906 | Avp/Bcl2l1. |
| GO_BP_m3GO:00313εnegative re3/539   | 64/23843  | 0.176149 | 0.561597 | 0.529906 | Bag5/Gnl3l  |
| GO_BP_m3GO:00603εpathway-rç3/539    | 64/23843  | 0.176149 | 0.561597 | 0.529906 | Bmp2/Gdf    |
| GO_BP_m3GO:190037positive reç3/539  | 64/23843  | 0.176149 | 0.561597 | 0.529906 | Avp/Bcl2l1. |
| GO_BP_m3GO:00063εDNA-tempç4/539     | 97/23843  | 0.17707  | 0.561597 | 0.529906 | Dmtf1/Gtf   |
| GO_BP_m3GO:00460εcAMP metç4/539     | 97/23843  | 0.17707  | 0.561597 | 0.529906 | Avp/Ghrhr,  |
| GO_BP_m3GO:00082C C21-steroid2/539  | 34/23843  | 0.178938 | 0.561597 | 0.529906 | Bmp2/Srd    |
| GO_BP_m3GO:001404dopamine 2/539     | 34/23843  | 0.178938 | 0.561597 | 0.529906 | Chrna4/Syt  |
| GO_BP_m3GO:00140εregulation 2/539   | 34/23843  | 0.178938 | 0.561597 | 0.529906 | Chrna4/Syt  |
| GO_BP_m3GO:003164positive reç2/539  | 34/23843  | 0.178938 | 0.561597 | 0.529906 | Chrn4/So.   |
| GO_BP_m3GO:00320εresponse tr2/539   | 34/23843  | 0.178938 | 0.561597 | 0.529906 | Mkks/Ucn    |
| GO_BP_m3GO:003362regulation 2/539   | 34/23843  | 0.178938 | 0.561597 | 0.529906 | Ccl5/Foxc2  |
| GO_BP_m3GO:004274circadian sl2/539  | 34/23843  | 0.178938 | 0.561597 | 0.529906 | Ghrhr/Nlgr  |
| GO_BP_m3GO:00515εhistone H3 2/539   | 34/23843  | 0.178938 | 0.561597 | 0.529906 | Kdm4b/Kd    |
| GO_BP_m3GO:00550εmonovalen2/539     | 34/23843  | 0.178938 | 0.561597 | 0.529906 | Slc12a7/Tf  |
| GO_BP_m3GO:00017C formation ç4/539  | 98/23843  | 0.181562 | 0.561597 | 0.529906 | Ctr9/Foxc2  |
| GO_BP_m3GO:00060εpyruvate r4/539    | 98/23843  | 0.181562 | 0.561597 | 0.529906 | Dlat/Dld/H  |
| GO_BP_m3GO:00307εregulation 4/539   | 98/23843  | 0.181562 | 0.561597 | 0.529906 | Avp/Ghrhr,  |
| GO_BP_m3GO:007022lymphocytr4/539    | 98/23843  | 0.181562 | 0.561597 | 0.529906 | Ccl5/Mir10  |
| GO_BP_m3GO:000271regulation 3/539   | 65/23843  | 0.181795 | 0.561597 | 0.529906 | Hk1/Prkcç/  |
| GO_BP_m3GO:001657histone deç3/539   | 65/23843  | 0.181795 | 0.561597 | 0.529906 | Jdp2/Lrrk2, |
| GO_BP_m3GO:004477mitotic DN 3/539   | 65/23843  | 0.181795 | 0.561597 | 0.529906 | Fanci/ler3/ |
| GO_BP_m3GO:00481εregulation 3/539   | 65/23843  | 0.181795 | 0.561597 | 0.529906 | Grik2/Syng  |
| GO_BP_m3GO:00485εcamera-tyç5/539    | 133/23843 | 0.183439 | 0.561597 | 0.529906 | Aqp5/Cdor   |
| GO_BP_m3GO:004881dendrite m6/539    | 169/23843 | 0.184813 | 0.561597 | 0.529906 | Caprin1/Cu  |
| GO_BP_m3GO:000231myeloid pr1/539    | 9/23843   | 0.186025 | 0.561597 | 0.529906 | Ankle1      |
| GO_BP_m3GO:00031εsecondary 1/539    | 9/23843   | 0.186025 | 0.561597 | 0.529906 | Axin2       |
| GO_BP_m3GO:000322ventricular 1/539  | 9/23843   | 0.186025 | 0.561597 | 0.529906 | Tgfbr1      |
| GO_BP_m3GO:000331pancreatic 1/539   | 9/23843   | 0.186025 | 0.561597 | 0.529906 | Hes1        |
| GO_BP_m3GO:000601mannose n1/539     | 9/23843   | 0.186025 | 0.561597 | 0.529906 | Pmm1        |
| GO_BP_m3GO:000734egg activat1/539   | 9/23843   | 0.186025 | 0.561597 | 0.529906 | Adam24      |
| GO_BP_m3GO:00075εparturition 1/539  | 9/23843   | 0.186025 | 0.561597 | 0.529906 | Hpgd        |
| GO_BP_m3GO:00083εgerm cell n1/539   | 9/23843   | 0.186025 | 0.561597 | 0.529906 | Tgfbr1      |
| GO_BP_m3GO:00158εpurine ribo1/539   | 9/23843   | 0.186025 | 0.561597 | 0.529906 | Slc25a17    |
| GO_BP_m3GO:00163εcalcium-inç1/539   | 9/23843   | 0.186025 | 0.561597 | 0.529906 | Bmp2        |
| GO_BP_m3GO:00170εrespiratory 1/539  | 9/23843   | 0.186025 | 0.561597 | 0.529906 | Bcs1l       |

|                   |                    |         |          |          |          |          |
|-------------------|--------------------|---------|----------|----------|----------|----------|
| GO_BP_m3GO:002185 | olfactory b 1/539  | 9/23843 | 0.186025 | 0.561597 | 0.529906 | Atf5     |
| GO_BP_m3GO:002202 | tangential 1/539   | 9/23843 | 0.186025 | 0.561597 | 0.529906 | Lrrk2    |
| GO_BP_m3GO:003030 | poly-N-ac 1/539    | 9/23843 | 0.186025 | 0.561597 | 0.529906 | B3gnt6   |
| GO_BP_m3GO:003031 | poly-N-ac 1/539    | 9/23843 | 0.186025 | 0.561597 | 0.529906 | B3gnt6   |
| GO_BP_m3GO:003091 | midbrain-t 1/539   | 9/23843 | 0.186025 | 0.561597 | 0.529906 | Hes1     |
| GO_BP_m3GO:003162 | positive re 1/539  | 9/23843 | 0.186025 | 0.561597 | 0.529906 | Ccl5     |
| GO_BP_m3GO:003200 | positive re 1/539  | 9/23843 | 0.186025 | 0.561597 | 0.529906 | Twist1   |
| GO_BP_m3GO:003331 | mitotic DN 1/539   | 9/23843 | 0.186025 | 0.561597 | 0.529906 | Oraov1   |
| GO_BP_m3GO:003435 | negative re 1/539  | 9/23843 | 0.186025 | 0.561597 | 0.529906 | Prkch    |
| GO_BP_m3GO:003436 | telomere te 1/539  | 9/23843 | 0.186025 | 0.561597 | 0.529906 | Ankle1   |
| GO_BP_m3GO:003455 | mitochond 1/539    | 9/23843 | 0.186025 | 0.561597 | 0.529906 | Bcs1l    |
| GO_BP_m3GO:003523 | ectopic ger 1/539  | 9/23843 | 0.186025 | 0.561597 | 0.529906 | Rhox5    |
| GO_BP_m3GO:004317 | nucleotide 1/539   | 9/23843 | 0.186025 | 0.561597 | 0.529906 | Fuk      |
| GO_BP_m3GO:004341 | regulation 1/539   | 9/23843 | 0.186025 | 0.561597 | 0.529906 | Myod1    |
| GO_BP_m3GO:004356 | negative re 1/539  | 9/23843 | 0.186025 | 0.561597 | 0.529906 | Bmp2     |
| GO_BP_m3GO:004560 | regulation 1/539   | 9/23843 | 0.186025 | 0.561597 | 0.529906 | Hes1     |
| GO_BP_m3GO:004563 | regulation 1/539   | 9/23843 | 0.186025 | 0.561597 | 0.529906 | Hes1     |
| GO_BP_m3GO:004601 | positive re 1/539  | 9/23843 | 0.186025 | 0.561597 | 0.529906 | Ghrhr    |
| GO_BP_m3GO:004660 | regulation 1/539   | 9/23843 | 0.186025 | 0.561597 | 0.529906 | Ranbp3l  |
| GO_BP_m3GO:004834 | paraxial m 1/539   | 9/23843 | 0.186025 | 0.561597 | 0.529906 | Foxc2    |
| GO_BP_m3GO:005150 | adenine nu 1/539   | 9/23843 | 0.186025 | 0.561597 | 0.529906 | Slc25a17 |
| GO_BP_m3GO:005266 | flavonoid c 1/539  | 9/23843 | 0.186025 | 0.561597 | 0.529906 | Ugt1a7c  |
| GO_BP_m3GO:005267 | xenobiotic 1/539   | 9/23843 | 0.186025 | 0.561597 | 0.529906 | Ugt1a7c  |
| GO_BP_m3GO:006031 | regulation 1/539   | 9/23843 | 0.186025 | 0.561597 | 0.529906 | Abr      |
| GO_BP_m3GO:006040 | positive re 1/539  | 9/23843 | 0.186025 | 0.561597 | 0.529906 | Oxt      |
| GO_BP_m3GO:006046 | lung lobe c 1/539  | 9/23843 | 0.186025 | 0.561597 | 0.529906 | Foxf1    |
| GO_BP_m3GO:006047 | lung lobe r 1/539  | 9/23843 | 0.186025 | 0.561597 | 0.529906 | Foxf1    |
| GO_BP_m3GO:006053 | diaphragm 1/539    | 9/23843 | 0.186025 | 0.561597 | 0.529906 | Tcf21    |
| GO_BP_m3GO:006100 | common b 1/539     | 9/23843 | 0.186025 | 0.561597 | 0.529906 | Hes1     |
| GO_BP_m3GO:007023 | regulation 1/539   | 9/23843 | 0.186025 | 0.561597 | 0.529906 | Tsc22d3  |
| GO_BP_m3GO:007054 | histone H3 1/539   | 9/23843 | 0.186025 | 0.561597 | 0.529906 | Kdm4b    |
| GO_BP_m3GO:007130 | cellular res 1/539 | 9/23843 | 0.186025 | 0.561597 | 0.529906 | Pdia3    |
| GO_BP_m3GO:007131 | cellular res 1/539 | 9/23843 | 0.186025 | 0.561597 | 0.529906 | Ptch1    |
| GO_BP_m3GO:007268 | T cell extra 1/539 | 9/23843 | 0.186025 | 0.561597 | 0.529906 | Ccl5     |
| GO_BP_m3GO:009004 | positive re 1/539  | 9/23843 | 0.186025 | 0.561597 | 0.529906 | Lrrk2    |
| GO_BP_m3GO:009009 | positive re 1/539  | 9/23843 | 0.186025 | 0.561597 | 0.529906 | Carmil2  |
| GO_BP_m3GO:009030 | regulation 1/539   | 9/23843 | 0.186025 | 0.561597 | 0.529906 | Uhrf1    |
| GO_BP_m3GO:009052 | sphingolipi 1/539  | 9/23843 | 0.186025 | 0.561597 | 0.529906 | S1pr1    |
| GO_BP_m3GO:009710 | postsynapt 1/539   | 9/23843 | 0.186025 | 0.561597 | 0.529906 | Nlgn1    |
| GO_BP_m3GO:009711 | postsynapt 1/539   | 9/23843 | 0.186025 | 0.561597 | 0.529906 | Nlgn1    |
| GO_BP_m3GO:009768 | glutamate 1/539    | 9/23843 | 0.186025 | 0.561597 | 0.529906 | Nlgn1    |
| GO_BP_m3GO:190183 | positive re 1/539  | 9/23843 | 0.186025 | 0.561597 | 0.529906 | Ippk     |
| GO_BP_m3GO:190209 | positive re 1/539  | 9/23843 | 0.186025 | 0.561597 | 0.529906 | Tacr1    |
| GO_BP_m3GO:190256 | regulation 1/539   | 9/23843 | 0.186025 | 0.561597 | 0.529906 | Abr      |
| GO_BP_m3GO:190397 | regulation 1/539   | 9/23843 | 0.186025 | 0.561597 | 0.529906 | Lrrk2    |
| GO_BP_m3GO:190466 | negative re 1/539  | 9/23843 | 0.186025 | 0.561597 | 0.529906 | Mad211   |
| GO_BP_m3GO:200034 | positive re 1/539  | 9/23843 | 0.186025 | 0.561597 | 0.529906 | Ccl5     |
| GO_BP_m3GO:200055 | regulation 1/539   | 9/23843 | 0.186025 | 0.561597 | 0.529906 | Prkcz    |

|                                     |           |          |          |          |             |
|-------------------------------------|-----------|----------|----------|----------|-------------|
| GO_BP_m3GO:200067regulation 1/539   | 9/23843   | 0.186025 | 0.561597 | 0.529906 | Crlf1       |
| GO_BP_m3GO:200098regulation 1/539   | 9/23843   | 0.186025 | 0.561597 | 0.529906 | Hes1        |
| GO_BP_m3GO:200117regulation 1/539   | 9/23843   | 0.186025 | 0.561597 | 0.529906 | Prkcζ       |
| GO_BP_m3GO:000727neuromusc2/539     | 35/23843  | 0.187112 | 0.561597 | 0.529906 | Chrna4/Ch   |
| GO_BP_m3GO:000815negative re2/539   | 35/23843  | 0.187112 | 0.561597 | 0.529906 | Enpp7/Nf2   |
| GO_BP_m3GO:003222regulation 2/539   | 35/23843  | 0.187112 | 0.561597 | 0.529906 | Nlgn1/Tacr  |
| GO_BP_m3GO:003314positive re2/539   | 35/23843  | 0.187112 | 0.561597 | 0.529906 | Gm13287/l   |
| GO_BP_m3GO:003590aorta morp2/539    | 35/23843  | 0.187112 | 0.561597 | 0.529906 | Hes1/Tfap2  |
| GO_BP_m3GO:004519regulation 2/539   | 35/23843  | 0.187112 | 0.561597 | 0.529906 | Exosc6/Mir  |
| GO_BP_m3GO:004568positive re2/539   | 35/23843  | 0.187112 | 0.561597 | 0.529906 | Prkch/Ptch  |
| GO_BP_m3GO:004800insulin-like 2/539 | 35/23843  | 0.187112 | 0.561597 | 0.529906 | Bmp2/Ghrl   |
| GO_BP_m3GO:005502negative re2/539   | 35/23843  | 0.187112 | 0.561597 | 0.529906 | Bmp2/Ctdc   |
| GO_BP_m3GO:190274apoptotic r2/539   | 35/23843  | 0.187112 | 0.561597 | 0.529906 | Cryaa/Foxc  |
| GO_BP_m3GO:001566inorganic a5/539   | 134/23843 | 0.187293 | 0.561749 | 0.530005 | Clcn1/P2ry  |
| GO_BP_m3GO:001631dephosphc11/539    | 357/23843 | 0.187426 | 0.561756 | 0.530056 | Bmp2/Ctdc   |
| GO_BP_m3GO:000614regulation 6/539   | 170/23843 | 0.188214 | 0.56333  | 0.531541 | Avp/Bcl2l1  |
| GO_BP_m3GO:000961response tr6/539   | 170/23843 | 0.188214 | 0.56333  | 0.531541 | Mir194-2/1  |
| GO_BP_m3GO:005134negative re12/539  | 397/23843 | 0.190623 | 0.569445 | 0.537311 | 9230104L0   |
| GO_BP_m3GO:003139positive re4/539   | 100/23843 | 0.190655 | 0.569445 | 0.537311 | Ctr9/Fanci/ |
| GO_BP_m3GO:005088endocrine i4/539   | 100/23843 | 0.190655 | 0.569445 | 0.537311 | Ndst2/Tacr  |
| GO_BP_m3GO:001657histone mc13/539   | 437/23843 | 0.193007 | 0.572728 | 0.540409 | Ctr9/Epop/  |
| GO_BP_m3GO:000602proteoglyc3/539    | 67/23843  | 0.193228 | 0.572728 | 0.540409 | Bmp2/Ihh/   |
| GO_BP_m3GO:000694regulation 3/539   | 67/23843  | 0.193228 | 0.572728 | 0.540409 | Chrn4/Ox    |
| GO_BP_m3GO:003238negative re3/539   | 67/23843  | 0.193228 | 0.572728 | 0.540409 | Foxf1/Lrrk2 |
| GO_BP_m3GO:003563multicellulz5/539  | 136/23843 | 0.195089 | 0.572728 | 0.540409 | Avp/Chrn4   |
| GO_BP_m3GO:002154cerebellum4/539    | 101/23843 | 0.195255 | 0.572728 | 0.540409 | Atxn2/Dixd  |
| GO_BP_m3GO:003153actin cytosl4/539  | 101/23843 | 0.195255 | 0.572728 | 0.540409 | Cass4/Hck/  |
| GO_BP_m3GO:004562positive re4/539   | 101/23843 | 0.195255 | 0.572728 | 0.540409 | Cd46/Ihh/F  |
| GO_BP_m3GO:005195regulation 4/539   | 101/23843 | 0.195255 | 0.572728 | 0.540409 | Avp/Chrna   |
| GO_BP_m3GO:006041heart grow4/539    | 101/23843 | 0.195255 | 0.572728 | 0.540409 | Ctdp1/Foxc  |
| GO_BP_m3GO:002179cerebral co2/539   | 36/23843  | 0.195336 | 0.572728 | 0.540409 | Dixdc1/Md   |
| GO_BP_m3GO:003022macrophag2/539     | 36/23843  | 0.195336 | 0.572728 | 0.540409 | L3mbtl3/N   |
| GO_BP_m3GO:004816regulation 2/539   | 36/23843  | 0.195336 | 0.572728 | 0.540409 | Grik2/Syng  |
| GO_BP_m3GO:004882erythrocyte2/539   | 36/23843  | 0.195336 | 0.572728 | 0.540409 | Klf2/L3mbt  |
| GO_BP_m3GO:005115negative re2/539   | 36/23843  | 0.195336 | 0.572728 | 0.540409 | Bmp2/Ctdc   |
| GO_BP_m3GO:006138heart trabe2/539   | 36/23843  | 0.195336 | 0.572728 | 0.540409 | S1pr1/Tgfb  |
| GO_BP_m3GO:190269regulation 2/539   | 36/23843  | 0.195336 | 0.572728 | 0.540409 | Lrrk2/Sox1  |
| GO_BP_m3GO:004478cilium orga10/539  | 322/23843 | 0.195444 | 0.572728 | 0.540409 | 1110004E0   |
| GO_BP_m3GO:004833mesoderm 3/539     | 68/23843  | 0.19901  | 0.572728 | 0.540409 | Foxc2/Foxf  |
| GO_BP_m3GO:003263interleukin 5/539  | 137/23843 | 0.199028 | 0.572728 | 0.540409 | C1qtnf4/Il1 |
| GO_BP_m3GO:005067positive re5/539   | 137/23843 | 0.199028 | 0.572728 | 0.540409 | Ccl5/Cd46/  |
| GO_BP_m3GO:190290negative re5/539   | 137/23843 | 0.199028 | 0.572728 | 0.540409 | Ckap2/Mkl   |
| GO_BP_m3GO:200102regulation 4/539   | 102/23843 | 0.199889 | 0.572728 | 0.540409 | Chrna4/Lrr  |
| GO_BP_m3GO:004327positive re9/539   | 286/23843 | 0.201131 | 0.572728 | 0.540409 | Avp/Ccl5/C  |
| GO_BP_m3GO:003510appendage6/539     | 174/23843 | 0.202054 | 0.572728 | 0.540409 | Gdf5/Ihh/P  |
| GO_BP_m3GO:003510limb morpl6/539    | 174/23843 | 0.202054 | 0.572728 | 0.540409 | Gdf5/Ihh/P  |
| GO_BP_m3GO:001082positive re5/539   | 138/23843 | 0.202995 | 0.572728 | 0.540409 | Ablim3/He   |
| GO_BP_m3GO:000205positive re2/539   | 37/23843  | 0.203605 | 0.572728 | 0.540409 | Foxf1/Ihh   |

|                                 |        |           |          |          |          |             |
|---------------------------------|--------|-----------|----------|----------|----------|-------------|
| GO_BP_m3GO:00030C skeletal m    | 2/539  | 37/23843  | 0.203605 | 0.572728 | 0.540409 | Tnni2/Tnnt  |
| GO_BP_m3GO:003051 positive re   | 2/539  | 37/23843  | 0.203605 | 0.572728 | 0.540409 | Gdf5/Hes1   |
| GO_BP_m3GO:00331C regulation    | 2/539  | 37/23843  | 0.203605 | 0.572728 | 0.540409 | Gm13287/I   |
| GO_BP_m3GO:00459E positive re   | 2/539  | 37/23843  | 0.203605 | 0.572728 | 0.540409 | Oxt/Tacr1   |
| GO_BP_m3GO:006067 placenta bl   | 2/539  | 37/23843  | 0.203605 | 0.572728 | 0.540409 | Esx1/Hes1   |
| GO_BP_m3GO:00726C interleukin   | 2/539  | 37/23843  | 0.203605 | 0.572728 | 0.540409 | C1qtnf4/Tv  |
| GO_BP_m3GO:19021C regulation    | 2/539  | 37/23843  | 0.203605 | 0.572728 | 0.540409 | Ier3/Them   |
| GO_BP_m3GO:19028C regulation    | 2/539  | 37/23843  | 0.203605 | 0.572728 | 0.540409 | Bmp2/Tgft   |
| GO_BP_m3GO:00457E negative re   | 13/539 | 442/23843 | 0.203681 | 0.572728 | 0.540409 | Atf5/Bcl2l1 |
| GO_BP_m3GO:005067 epithelial c  | 12/539 | 403/23843 | 0.204029 | 0.572728 | 0.540409 | Areg/Bmp    |
| GO_BP_m3GO:00003C protein der   | 1/539  | 10/23843  | 0.204433 | 0.572728 | 0.540409 | Cops7a      |
| GO_BP_m3GO:00030C renal water   | 1/539  | 10/23843  | 0.204433 | 0.572728 | 0.540409 | Tfap2b      |
| GO_BP_m3GO:00032C regulation    | 1/539  | 10/23843  | 0.204433 | 0.572728 | 0.540409 | Hes1        |
| GO_BP_m3GO:00060C glucose ca    | 1/539  | 10/23843  | 0.204433 | 0.572728 | 0.540409 | Hk1         |
| GO_BP_m3GO:00071E neuron cell   | 1/539  | 10/23843  | 0.204433 | 0.572728 | 0.540409 | Nlgn1       |
| GO_BP_m3GO:00093C snRNA trar    | 1/539  | 10/23843  | 0.204433 | 0.572728 | 0.540409 | Snopc1      |
| GO_BP_m3GO:001004 response tr   | 1/539  | 10/23843  | 0.204433 | 0.572728 | 0.540409 | Lrrk2       |
| GO_BP_m3GO:001482 artery smo    | 1/539  | 10/23843  | 0.204433 | 0.572728 | 0.540409 | Mkks        |
| GO_BP_m3GO:00158E nucleoside    | 1/539  | 10/23843  | 0.204433 | 0.572728 | 0.540409 | Slc25a17    |
| GO_BP_m3GO:00158E purine nucl   | 1/539  | 10/23843  | 0.204433 | 0.572728 | 0.540409 | Slc25a17    |
| GO_BP_m3GO:00180E protein-co    | 1/539  | 10/23843  | 0.204433 | 0.572728 | 0.540409 | Gcsh        |
| GO_BP_m3GO:00182C peptidyl-m    | 1/539  | 10/23843  | 0.204433 | 0.572728 | 0.540409 | Naa25       |
| GO_BP_m3GO:003162 regulation    | 1/539  | 10/23843  | 0.204433 | 0.572728 | 0.540409 | Ccl5        |
| GO_BP_m3GO:003194 regulation    | 1/539  | 10/23843  | 0.204433 | 0.572728 | 0.540409 | Bmp2        |
| GO_BP_m3GO:003222 positive re   | 1/539  | 10/23843  | 0.204433 | 0.572728 | 0.540409 | Tacr1       |
| GO_BP_m3GO:003234 aldosteron    | 1/539  | 10/23843  | 0.204433 | 0.572728 | 0.540409 | Bmp2        |
| GO_BP_m3GO:00330E regulation    | 1/539  | 10/23843  | 0.204433 | 0.572728 | 0.540409 | Ihh         |
| GO_BP_m3GO:00330E negative re   | 1/539  | 10/23843  | 0.204433 | 0.572728 | 0.540409 | Ihh         |
| GO_BP_m3GO:00331E regulation    | 1/539  | 10/23843  | 0.204433 | 0.572728 | 0.540409 | Ctr9        |
| GO_BP_m3GO:003321 leptin-mec    | 1/539  | 10/23843  | 0.204433 | 0.572728 | 0.540409 | Mkks        |
| GO_BP_m3GO:00343E regulation    | 1/539  | 10/23843  | 0.204433 | 0.572728 | 0.540409 | Prkch       |
| GO_BP_m3GO:003442 nuclear-tra   | 1/539  | 10/23843  | 0.204433 | 0.572728 | 0.540409 | Exosc6      |
| GO_BP_m3GO:00346E cortisol me   | 1/539  | 10/23843  | 0.204433 | 0.572728 | 0.540409 | Bmp2        |
| GO_BP_m3GO:00353C regulation    | 1/539  | 10/23843  | 0.204433 | 0.572728 | 0.540409 | Nf2         |
| GO_BP_m3GO:00354C phosphate     | 1/539  | 10/23843  | 0.204433 | 0.572728 | 0.540409 | Slc37a2     |
| GO_BP_m3GO:003587 protein K1    | 1/539  | 10/23843  | 0.204433 | 0.572728 | 0.540409 | Otud3       |
| GO_BP_m3GO:004314 snoRNA pr     | 1/539  | 10/23843  | 0.204433 | 0.572728 | 0.540409 | Exosc6      |
| GO_BP_m3GO:004392 negative re   | 1/539  | 10/23843  | 0.204433 | 0.572728 | 0.540409 | Ccl5        |
| GO_BP_m3GO:00451E neuronal ic   | 1/539  | 10/23843  | 0.204433 | 0.572728 | 0.540409 | Sc1t1       |
| GO_BP_m3GO:00456C negative re   | 1/539  | 10/23843  | 0.204433 | 0.572728 | 0.540409 | Tgfbr1      |
| GO_BP_m3GO:004654 developme     | 1/539  | 10/23843  | 0.204433 | 0.572728 | 0.540409 | Areg        |
| GO_BP_m3GO:00468E follicle-stin | 1/539  | 10/23843  | 0.204433 | 0.572728 | 0.540409 | Ucn2        |
| GO_BP_m3GO:00487C embryonic     | 1/539  | 10/23843  | 0.204433 | 0.572728 | 0.540409 | Foxc2       |
| GO_BP_m3GO:005101 actin filam   | 1/539  | 10/23843  | 0.204433 | 0.572728 | 0.540409 | Fmn1        |
| GO_BP_m3GO:00514E corticotrop   | 1/539  | 10/23843  | 0.204433 | 0.572728 | 0.540409 | Ucn         |
| GO_BP_m3GO:005197 positive re   | 1/539  | 10/23843  | 0.204433 | 0.572728 | 0.540409 | Chrn4       |
| GO_BP_m3GO:00608C neural plat   | 1/539  | 10/23843  | 0.204433 | 0.572728 | 0.540409 | Ptch1       |
| GO_BP_m3GO:00609E coronary a    | 1/539  | 10/23843  | 0.204433 | 0.572728 | 0.540409 | Tgfbr1      |

|                                                          |           |          |          |          |              |
|----------------------------------------------------------|-----------|----------|----------|----------|--------------|
| GO_BP_m3GO:007009regulation 1/539                        | 10/23843  | 0.204433 | 0.572728 | 0.540409 | Gip          |
| GO_BP_m3GO:007168striated muscle 1/539                   | 10/23843  | 0.204433 | 0.572728 | 0.540409 | Mybph        |
| GO_BP_m3GO:007188macrophage 1/539                        | 10/23843  | 0.204433 | 0.572728 | 0.540409 | Ccl5         |
| GO_BP_m3GO:007201distal tubule 1/539                     | 10/23843  | 0.204433 | 0.572728 | 0.540409 | Tfap2b       |
| GO_BP_m3GO:007217metanephros 1/539                       | 10/23843  | 0.204433 | 0.572728 | 0.540409 | Hes1         |
| GO_BP_m3GO:007220cell proliferation 1/539                | 10/23843  | 0.204433 | 0.572728 | 0.540409 | Ptch1        |
| GO_BP_m3GO:007260interleukin 1/539                       | 10/23843  | 0.204433 | 0.572728 | 0.540409 | Prkcz        |
| GO_BP_m3GO:009028negative regulation 1/539               | 10/23843  | 0.204433 | 0.572728 | 0.540409 | Hes1         |
| GO_BP_m3GO:009052actin filament 1/539                    | 10/23843  | 0.204433 | 0.572728 | 0.540409 | Cass4        |
| GO_BP_m3GO:009708vascular smooth muscle 1/539            | 10/23843  | 0.204433 | 0.572728 | 0.540409 | Hes1         |
| GO_BP_m3GO:009710presynaptic transmission 1/539          | 10/23843  | 0.204433 | 0.572728 | 0.540409 | Nlgn1        |
| GO_BP_m3GO:190004regulation 1/539                        | 10/23843  | 0.204433 | 0.572728 | 0.540409 | Carmil2      |
| GO_BP_m3GO:190011negative regulation 1/539               | 10/23843  | 0.204433 | 0.572728 | 0.540409 | Bcl2l1       |
| GO_BP_m3GO:190197positive regulation 1/539               | 10/23843  | 0.204433 | 0.572728 | 0.540409 | Mad2l1       |
| GO_BP_m3GO:190417regulation 1/539                        | 10/23843  | 0.204433 | 0.572728 | 0.540409 | Mir103-2     |
| GO_BP_m3GO:200004negative regulation 1/539               | 10/23843  | 0.204433 | 0.572728 | 0.540409 | D330045A1    |
| GO_BP_m3GO:200010regulation 1/539                        | 10/23843  | 0.204433 | 0.572728 | 0.540409 | Ccl5         |
| GO_BP_m3GO:200034positive regulation 1/539               | 10/23843  | 0.204433 | 0.572728 | 0.540409 | Fam170b      |
| GO_BP_m3GO:004663alpha-beta interferon 4/539             | 103/23843 | 0.204555 | 0.572728 | 0.540409 | Ihh/Nkx2-3   |
| GO_BP_m3GO:200011negative regulation 4/539               | 103/23843 | 0.204555 | 0.572728 | 0.540409 | 9230104L0    |
| GO_BP_m3GO:002202telencephalon 3/539                     | 69/23843  | 0.204833 | 0.573133 | 0.540791 | Dixdc1/Lrrk1 |
| GO_BP_m3GO:004860reproductive system 13/539              | 443/23843 | 0.205847 | 0.575595 | 0.543114 | Bcl2l1/Ccni  |
| GO_BP_m3GO:003294positive regulation 5/539               | 139/23843 | 0.206988 | 0.578407 | 0.545767 | Ccl5/Cd46/   |
| GO_BP_m3GO:000754sex differentiation 9/539               | 289/23843 | 0.209267 | 0.584396 | 0.551418 | Bcl2l1/Dhc   |
| GO_BP_m3GO:006053muscle tissue 13/539                    | 445/23843 | 0.21021  | 0.58665  | 0.553545 | Bmp2/Cdo     |
| GO_BP_m3GO:200010negative regulation 3/539               | 70/23843  | 0.210695 | 0.587621 | 0.554461 | Ccl5/Mir10   |
| GO_BP_m3GO:001821peptidyl-tyrosine phosphorylation 5/539 | 140/23843 | 0.211006 | 0.587958 | 0.55478  | Hk1/Lrrk2/   |
| GO_BP_m3GO:000906serine family 2/539                     | 38/23843  | 0.211911 | 0.587958 | 0.55478  | Gcsh/Thnsl   |
| GO_BP_m3GO:001633calcium-dependent 2/539                 | 38/23843  | 0.211911 | 0.587958 | 0.55478  | Cdh26/Nlg    |
| GO_BP_m3GO:004688regulation 2/539                        | 38/23843  | 0.211911 | 0.587958 | 0.55478  | Bmp2/Stc2    |
| GO_BP_m3GO:004879calcium ion 2/539                       | 38/23843  | 0.211911 | 0.587958 | 0.55478  | Syt4/Syt6    |
| GO_BP_m3GO:009717ruffle assembly 2/539                   | 38/23843  | 0.211911 | 0.587958 | 0.55478  | Nlgn1/Carr   |
| GO_BP_m3GO:200040regulation 2/539                        | 38/23843  | 0.211911 | 0.587958 | 0.55478  | Aire/Ccl5    |
| GO_BP_m3GO:200102positive regulation 2/539               | 38/23843  | 0.211911 | 0.587958 | 0.55478  | Chrna4/Ptpr  |
| GO_BP_m3GO:002241cellular process 11/539                 | 368/23843 | 0.213507 | 0.590333 | 0.55702  | Bcl2l1/Cats  |
| GO_BP_m3GO:001583amine transport 4/539                   | 105/23843 | 0.213983 | 0.590333 | 0.55702  | Avp/Chrna    |
| GO_BP_m3GO:002198cerebral cortex 4/539                   | 105/23843 | 0.213983 | 0.590333 | 0.55702  | Cdon/Dixd    |
| GO_BP_m3GO:006145reproductive system 13/539              | 447/23843 | 0.214614 | 0.590333 | 0.55702  | Bcl2l1/Ccni  |
| GO_BP_m3GO:000320cardiac chamber 5/539                   | 141/23843 | 0.21505  | 0.590333 | 0.55702  | Foxc2/Foxf   |
| GO_BP_m3GO:001097transport across 5/539                  | 141/23843 | 0.21505  | 0.590333 | 0.55702  | Ap3s1/BC0    |
| GO_BP_m3GO:009911microtubule 5/539                       | 141/23843 | 0.21505  | 0.590333 | 0.55702  | Ap3s1/BC0    |
| GO_BP_m3GO:012003plasma membrane 14/539                  | 487/23843 | 0.215492 | 0.590333 | 0.55702  | 1110004E0    |
| GO_BP_m3GO:003106regulation 3/539                        | 71/23843  | 0.216593 | 0.590333 | 0.55702  | Ctr9/Kdm4    |
| GO_BP_m3GO:003227negative regulation 3/539               | 71/23843  | 0.216593 | 0.590333 | 0.55702  | Mkks/Carr    |
| GO_BP_m3GO:003289regulation 3/539                        | 71/23843  | 0.216593 | 0.590333 | 0.55702  | Avp/Oxt/Sy   |
| GO_BP_m3GO:004336CD4-positive 3/539                      | 71/23843  | 0.216593 | 0.590333 | 0.55702  | Nkx2-3/Prk   |
| GO_BP_m3GO:005507calcium ion 13/539                      | 448/23843 | 0.216831 | 0.590333 | 0.55702  | Avp/Calb2/   |
| GO_BP_m3GO:005109regulation 11/539                       | 370/23843 | 0.218406 | 0.590333 | 0.55702  | Bmp2/Cdo     |

|                   |              |        |           |          |          |         |             |
|-------------------|--------------|--------|-----------|----------|----------|---------|-------------|
| GO_BP_m3GO:001656 | covalent ct  | 13/539 | 449/23843 | 0.219057 | 0.590333 | 0.55702 | Ctr9/Epop/  |
| GO_BP_m3GO:005077 | regulation   | 6/539  | 179/23843 | 0.219854 | 0.590333 | 0.55702 | Caprin1/Cu  |
| GO_BP_m3GO:005087 | positive reg | 6/539  | 179/23843 | 0.219854 | 0.590333 | 0.55702 | Ccl5/Cd46/  |
| GO_BP_m3GO:000317 | heart valve  | 2/539  | 39/23843  | 0.22025  | 0.590333 | 0.55702 | Bmp2/Twis   |
| GO_BP_m3GO:000734 | acrosome     | 1/539  | 39/23843  | 0.22025  | 0.590333 | 0.55702 | Fam170b/9   |
| GO_BP_m3GO:003043 | sleep        | 2/539  | 39/23843  | 0.22025  | 0.590333 | 0.55702 | Ghrhr/Oxt   |
| GO_BP_m3GO:003157 | G2 DNA da    | 2/539  | 39/23843  | 0.22025  | 0.590333 | 0.55702 | Fanci/Ier3  |
| GO_BP_m3GO:006012 | inner ear    | 1/539  | 39/23843  | 0.22025  | 0.590333 | 0.55702 | Hes1/Whrr   |
| GO_BP_m3GO:004592 | positive reg | 9/539  | 293/23843 | 0.220317 | 0.590333 | 0.55702 | Avp/Cryaa/  |
| GO_BP_m3GO:002195 | central ner  | 7/539  | 217/23843 | 0.221592 | 0.590333 | 0.55702 | Atf5/Atxn2. |
| GO_BP_m3GO:000292 | negative re  | 1/539  | 11/23843  | 0.222425 | 0.590333 | 0.55702 | Cd46        |
| GO_BP_m3GO:000326 | cardioblast  | 1/539  | 11/23843  | 0.222425 | 0.590333 | 0.55702 | Hes1        |
| GO_BP_m3GO:000326 | regulation   | 1/539  | 11/23843  | 0.222425 | 0.590333 | 0.55702 | Hes1        |
| GO_BP_m3GO:00033C | Wnt signali  | 1/539  | 11/23843  | 0.222425 | 0.590333 | 0.55702 | Bmp2        |
| GO_BP_m3GO:00067C | mineralocc   | 1/539  | 11/23843  | 0.222425 | 0.590333 | 0.55702 | Bmp2        |
| GO_BP_m3GO:000981 | flavonoid    | n1/539 | 11/23843  | 0.222425 | 0.590333 | 0.55702 | Ugt1a7c     |
| GO_BP_m3GO:001074 | positive reg | 1/539  | 11/23843  | 0.222425 | 0.590333 | 0.55702 | Prkch       |
| GO_BP_m3GO:001082 | positive reg | 1/539  | 11/23843  | 0.222425 | 0.590333 | 0.55702 | Ccl5        |
| GO_BP_m3GO:001483 | urinary bla  | 1/539  | 11/23843  | 0.222425 | 0.590333 | 0.55702 | Tacr1       |
| GO_BP_m3GO:003103 | myosin fila  | 1/539  | 11/23843  | 0.222425 | 0.590333 | 0.55702 | Mybph       |
| GO_BP_m3GO:003234 | aldosteron   | 1/539  | 11/23843  | 0.222425 | 0.590333 | 0.55702 | Bmp2        |
| GO_BP_m3GO:00330C | negative re  | 1/539  | 11/23843  | 0.222425 | 0.590333 | 0.55702 | Foxf1       |
| GO_BP_m3GO:00330E | immature     | 1/539  | 11/23843  | 0.222425 | 0.590333 | 0.55702 | Ihh         |
| GO_BP_m3GO:003323 | negative re  | 1/539  | 11/23843  | 0.222425 | 0.590333 | 0.55702 | Gnl3l       |
| GO_BP_m3GO:00336C | positive reg | 1/539  | 11/23843  | 0.222425 | 0.590333 | 0.55702 | Chrna4      |
| GO_BP_m3GO:00336E | cell-cell ad | 1/539  | 11/23843  | 0.222425 | 0.590333 | 0.55702 | Ccl5        |
| GO_BP_m3GO:003533 | fatty-acyl-  | 1/539  | 11/23843  | 0.222425 | 0.590333 | 0.55702 | Them4       |
| GO_BP_m3GO:003563 | bone mine    | 1/539  | 11/23843  | 0.222425 | 0.590333 | 0.55702 | Bmp2        |
| GO_BP_m3GO:004519 | maintenan    | 1/539  | 11/23843  | 0.222425 | 0.590333 | 0.55702 | Pdzd11      |
| GO_BP_m3GO:00460C | negative re  | 1/539  | 11/23843  | 0.222425 | 0.590333 | 0.55702 | Btn1a1      |
| GO_BP_m3GO:00466C | positive reg | 1/539  | 11/23843  | 0.222425 | 0.590333 | 0.55702 | Ranbp3l     |
| GO_BP_m3GO:004831 | intracellula | 1/539  | 11/23843  | 0.222425 | 0.590333 | 0.55702 | Lrrk2       |
| GO_BP_m3GO:004861 | embryonic    | 1/539  | 11/23843  | 0.222425 | 0.590333 | 0.55702 | Foxf1       |
| GO_BP_m3GO:00486E | neuron fat   | 1/539  | 11/23843  | 0.222425 | 0.590333 | 0.55702 | Hes1        |
| GO_BP_m3GO:00516C | exocyst loc  | 1/539  | 11/23843  | 0.222425 | 0.590333 | 0.55702 | Exoc1       |
| GO_BP_m3GO:00516E | actin filam  | 1/539  | 11/23843  | 0.222425 | 0.590333 | 0.55702 | Carmil2     |
| GO_BP_m3GO:00601E | regulation   | 1/539  | 11/23843  | 0.222425 | 0.590333 | 0.55702 | Lrrk2       |
| GO_BP_m3GO:006034 | positive reg | 1/539  | 11/23843  | 0.222425 | 0.590333 | 0.55702 | Trim6       |
| GO_BP_m3GO:00604C | regulation   | 1/539  | 11/23843  | 0.222425 | 0.590333 | 0.55702 | Oxt         |
| GO_BP_m3GO:00604E | positive reg | 1/539  | 11/23843  | 0.222425 | 0.590333 | 0.55702 | Ucn         |
| GO_BP_m3GO:00606C | dichotomo    | 1/539  | 11/23843  | 0.222425 | 0.590333 | 0.55702 | Areg        |
| GO_BP_m3GO:00609C | embryonic    | 1/539  | 11/23843  | 0.222425 | 0.590333 | 0.55702 | Twist1      |
| GO_BP_m3GO:006161 | glycolytic   | p1/539 | 11/23843  | 0.222425 | 0.590333 | 0.55702 | Hk1         |
| GO_BP_m3GO:007009 | glucagon s   | 1/539  | 11/23843  | 0.222425 | 0.590333 | 0.55702 | Gip         |
| GO_BP_m3GO:00706C | centromeri   | 1/539  | 11/23843  | 0.222425 | 0.590333 | 0.55702 | Axin2       |
| GO_BP_m3GO:00708E | positive reg | 1/539  | 11/23843  | 0.222425 | 0.590333 | 0.55702 | Tmem30b     |
| GO_BP_m3GO:007163 | positive reg | 1/539  | 11/23843  | 0.222425 | 0.590333 | 0.55702 | Twist1      |
| GO_BP_m3GO:007167 | commissur    | 1/539  | 11/23843  | 0.222425 | 0.590333 | 0.55702 | Ptch1       |



|                                                             |           |          |          |          |                 |
|-------------------------------------------------------------|-----------|----------|----------|----------|-----------------|
| GO_BP_m3GO:007207metanephros1/539                           | 11/23843  | 0.222425 | 0.590333 | 0.55702  | Tcf21           |
| GO_BP_m3GO:007210glomerulus1/539                            | 11/23843  | 0.222425 | 0.590333 | 0.55702  | Tcf21           |
| GO_BP_m3GO:009007positive regulation1/539                   | 11/23843  | 0.222425 | 0.590333 | 0.55702  | Gnl3l           |
| GO_BP_m3GO:009039negative regulation1/539                   | 11/23843  | 0.222425 | 0.590333 | 0.55702  | Lrrk2           |
| GO_BP_m3GO:190036regulation1/539                            | 11/23843  | 0.222425 | 0.590333 | 0.55702  | Ctr9            |
| GO_BP_m3GO:200057regulation1/539                            | 11/23843  | 0.222425 | 0.590333 | 0.55702  | BC048507        |
| GO_BP_m3GO:002188forebrain development3/539                 | 72/23843  | 0.222526 | 0.590333 | 0.55702  | Dixdc1/Lrrk2    |
| GO_BP_m3GO:004567regulation3/539                            | 72/23843  | 0.222526 | 0.590333 | 0.55702  | Ccl5/Tmem43     |
| GO_BP_m3GO:006056neuroepithelial cell proliferation3/539    | 72/23843  | 0.222526 | 0.590333 | 0.55702  | Bmp2/Hes1       |
| GO_BP_m3GO:000323cardiac ventricle development5/539         | 143/23843 | 0.223209 | 0.5908   | 0.557461 | Foxc2/Foxf1     |
| GO_BP_m3GO:003032embryonic development5/539                 | 143/23843 | 0.223209 | 0.5908   | 0.557461 | Gdf5/Ihh/Pitd3  |
| GO_BP_m3GO:003511embryonic development5/539                 | 143/23843 | 0.223209 | 0.5908   | 0.557461 | Gdf5/Ihh/Pitd3  |
| GO_BP_m3GO:003286cellular respiration6/539                  | 180/23843 | 0.223476 | 0.5908   | 0.557461 | Foxc2/Ghr23     |
| GO_BP_m3GO:000828insulin receptor signaling4/539            | 107/23843 | 0.223528 | 0.5908   | 0.557461 | Foxc2/Prkc      |
| GO_BP_m3GO:009010positive regulation4/539                   | 107/23843 | 0.223528 | 0.5908   | 0.557461 | Bmp2/Gdf5       |
| GO_BP_m3GO:005114striated muscle cell development9/539      | 295/23843 | 0.225925 | 0.595373 | 0.561776 | Bmp2/Cdo        |
| GO_BP_m3GO:003295regulation10/539                           | 334/23843 | 0.226255 | 0.595373 | 0.561776 | Dixdc1/Gpi2     |
| GO_BP_m3GO:001094negative regulation7/539                   | 219/23843 | 0.228177 | 0.595373 | 0.561776 | Atf5/Ccnf/Id4   |
| GO_BP_m3GO:000334cilium movement3/539                       | 73/23843  | 0.22849  | 0.595373 | 0.561776 | 1110004E0       |
| GO_BP_m3GO:000178B cell apoptosis2/539                      | 40/23843  | 0.228615 | 0.595373 | 0.561776 | Mir106b/Mir106a |
| GO_BP_m3GO:000315regulation2/539                            | 40/23843  | 0.228615 | 0.595373 | 0.561776 | Bmp2/Hes1       |
| GO_BP_m3GO:001082regulation2/539                            | 40/23843  | 0.228615 | 0.595373 | 0.561776 | Ccnf/Cep1       |
| GO_BP_m3GO:003080positive regulation2/539                   | 40/23843  | 0.228615 | 0.595373 | 0.561776 | Avp/Rln3        |
| GO_BP_m3GO:003334cholesterol homeostasis2/539               | 40/23843  | 0.228615 | 0.595373 | 0.561776 | Ptch1/Stx1      |
| GO_BP_m3GO:006060mammary gland development2/539             | 40/23843  | 0.228615 | 0.595373 | 0.561776 | Areg/Ptch1      |
| GO_BP_m3GO:009027regulation2/539                            | 40/23843  | 0.228615 | 0.595373 | 0.561776 | Hes1/Ucn        |
| GO_BP_m3GO:009878ncRNA transcription2/539                   | 40/23843  | 0.228615 | 0.595373 | 0.561776 | Ippk/Snapp      |
| GO_BP_m3GO:190027regulation2/539                            | 40/23843  | 0.228615 | 0.595373 | 0.561776 | Calb2/Ptpr      |
| GO_BP_m3GO:200072regulation2/539                            | 40/23843  | 0.228615 | 0.595373 | 0.561776 | Bmp2/Ctdp       |
| GO_BP_m3GO:004301camera-type10/539                          | 335/23843 | 0.228905 | 0.595373 | 0.561776 | Aqp5/Cdora      |
| GO_BP_m3GO:001993cAMP-mediated signaling5/539               | 145/23843 | 0.231461 | 0.595373 | 0.561776 | Adm2/Ghrl       |
| GO_BP_m3GO:007066positive regulation5/539                   | 145/23843 | 0.231461 | 0.595373 | 0.561776 | Ccl5/Cd46/      |
| GO_BP_m3GO:004339regulation7/539                            | 220/23843 | 0.231495 | 0.595373 | 0.561776 | Bmp2/Cdo        |
| GO_BP_m3GO:005067regulation7/539                            | 220/23843 | 0.231495 | 0.595373 | 0.561776 | Btn1a1/Ccl      |
| GO_BP_m3GO:003030positive regulation6/539                   | 183/23843 | 0.234458 | 0.595373 | 0.561776 | Avp/Cryaa       |
| GO_BP_m3GO:006201positive regulation6/539                   | 183/23843 | 0.234458 | 0.595373 | 0.561776 | Avp/Bcl2l1      |
| GO_BP_m3GO:000231B cell activation3/539                     | 74/23843  | 0.234484 | 0.595373 | 0.561776 | Exosc6/Mir      |
| GO_BP_m3GO:005178positive regulation3/539                   | 74/23843  | 0.234484 | 0.595373 | 0.561776 | Neurog1/R       |
| GO_BP_m3GO:190370negative regulation5/539                   | 146/23843 | 0.235619 | 0.595373 | 0.561776 | Ctr9/Hes1/      |
| GO_BP_m3GO:000701microtubule cytoskeleton organization8/539 | 260/23843 | 0.236751 | 0.595373 | 0.561776 | 1110004E0       |
| GO_BP_m3GO:000196positive regulation2/539                   | 41/23843  | 0.237001 | 0.595373 | 0.561776 | C1qtnf4/Tr      |
| GO_BP_m3GO:000650membrane organization2/539                 | 41/23843  | 0.237001 | 0.595373 | 0.561776 | Pacsin3/Prt     |
| GO_BP_m3GO:000669prostanoid production2/539                 | 41/23843  | 0.237001 | 0.595373 | 0.561776 | Avp/Hpgd        |
| GO_BP_m3GO:000669prostaglandin production2/539              | 41/23843  | 0.237001 | 0.595373 | 0.561776 | Avp/Hpgd        |
| GO_BP_m3GO:001010potassium ion transport2/539               | 41/23843  | 0.237001 | 0.595373 | 0.561776 | Kcnj4/Slc12     |
| GO_BP_m3GO:001051positive regulation2/539                   | 41/23843  | 0.237001 | 0.595373 | 0.561776 | Ccl5/Prkcz      |
| GO_BP_m3GO:001076positive regulation2/539                   | 41/23843  | 0.237001 | 0.595373 | 0.561776 | Prss8/Sgk1      |
| GO_BP_m3GO:001095negative regulation2/539                   | 41/23843  | 0.237001 | 0.595373 | 0.561776 | Cd46/Lrrk2      |

|                                     |           |          |          |          |             |
|-------------------------------------|-----------|----------|----------|----------|-------------|
| GO_BP_m3GO:001967NAD metal2/539     | 41/23843  | 0.237001 | 0.595373 | 0.561776 | Hk1/Slc37a  |
| GO_BP_m3GO:002169cerebellar c2/539  | 41/23843  | 0.237001 | 0.595373 | 0.561776 | Atxn2/Whr   |
| GO_BP_m3GO:003296regulation 2/539   | 41/23843  | 0.237001 | 0.595373 | 0.561776 | lh/h/Ucn    |
| GO_BP_m3GO:004549photorecep2/539    | 41/23843  | 0.237001 | 0.595373 | 0.561776 | Mkks/Nxn1   |
| GO_BP_m3GO:004592positive re2/539   | 41/23843  | 0.237001 | 0.595373 | 0.561776 | Avp/Twist1  |
| GO_BP_m3GO:004663positive re2/539   | 41/23843  | 0.237001 | 0.595373 | 0.561776 | lh/h/Prkc   |
| GO_BP_m3GO:004678regulation 2/539   | 41/23843  | 0.237001 | 0.595373 | 0.561776 | Ccl5/Ctdp1  |
| GO_BP_m3GO:004749vesicle tran2/539  | 41/23843  | 0.237001 | 0.595373 | 0.561776 | Ap3s1/Prkc  |
| GO_BP_m3GO:005069regulation 2/539   | 41/23843  | 0.237001 | 0.595373 | 0.561776 | Ccl5/Trim6  |
| GO_BP_m3GO:005159positive re2/539   | 41/23843  | 0.237001 | 0.595373 | 0.561776 | Bcl2l1/Nlgr |
| GO_BP_m3GO:006101positive re2/539   | 41/23843  | 0.237001 | 0.595373 | 0.561776 | Hnrnpr/Na   |
| GO_BP_m3GO:190331negative re2/539   | 41/23843  | 0.237001 | 0.595373 | 0.561776 | Cd46/Lrrk2  |
| GO_BP_m3GO:003051intracellula 4/539 | 110/23843 | 0.238045 | 0.595373 | 0.561776 | Ghrhr/Kdm   |
| GO_BP_m3GO:000237immunoglc 7/539    | 222/23843 | 0.238179 | 0.595373 | 0.561776 | Exosc6/Igk  |
| GO_BP_m3GO:003294regulation 7/539   | 222/23843 | 0.238179 | 0.595373 | 0.561776 | Btn1a1/Ccl  |
| GO_BP_m3GO:000184neural plat1/539   | 12/23843  | 0.240011 | 0.595373 | 0.561776 | Ptch1       |
| GO_BP_m3GO:000201regulation 1/539   | 12/23843  | 0.240011 | 0.595373 | 0.561776 | Tacr1       |
| GO_BP_m3GO:000232pro-B cell c1/539  | 12/23843  | 0.240011 | 0.595373 | 0.561776 | Hes1        |
| GO_BP_m3GO:000232pre-B cell c1/539  | 12/23843  | 0.240011 | 0.595373 | 0.561776 | Mir19a      |
| GO_BP_m3GO:000312heart field :1/539 | 12/23843  | 0.240011 | 0.595373 | 0.561776 | Axin2       |
| GO_BP_m3GO:000318mitral valve1/539  | 12/23843  | 0.240011 | 0.595373 | 0.561776 | Twist1      |
| GO_BP_m3GO:000335regulation 1/539   | 12/23843  | 0.240011 | 0.595373 | 0.561776 | Mkks        |
| GO_BP_m3GO:000602inositol me1/539   | 12/23843  | 0.240011 | 0.595373 | 0.561776 | Ippk        |
| GO_BP_m3GO:000607glycerol-3-1/539   | 12/23843  | 0.240011 | 0.595373 | 0.561776 | Slc37a2     |
| GO_BP_m3GO:000685oligopeptic1/539   | 12/23843  | 0.240011 | 0.595373 | 0.561776 | Slc15a3     |
| GO_BP_m3GO:000744foregut mc1/539    | 12/23843  | 0.240011 | 0.595373 | 0.561776 | Foxf1       |
| GO_BP_m3GO:000821mineralocc1/539    | 12/23843  | 0.240011 | 0.595373 | 0.561776 | Bmp2        |
| GO_BP_m3GO:001081regulation 1/539   | 12/23843  | 0.240011 | 0.595373 | 0.561776 | Ccl5        |
| GO_BP_m3GO:001082negative re1/539   | 12/23843  | 0.240011 | 0.595373 | 0.561776 | Ccnf        |
| GO_BP_m3GO:001482tonic smoc1/539    | 12/23843  | 0.240011 | 0.595373 | 0.561776 | Mkks        |
| GO_BP_m3GO:001484urinary trac1/539  | 12/23843  | 0.240011 | 0.595373 | 0.561776 | Tacr1       |
| GO_BP_m3GO:001692protein de1/539    | 12/23843  | 0.240011 | 0.595373 | 0.561776 | Gm5415      |
| GO_BP_m3GO:002152ventral spir1/539  | 12/23843  | 0.240011 | 0.595373 | 0.561776 | Nkx6-1      |
| GO_BP_m3GO:003083positive re1/539   | 12/23843  | 0.240011 | 0.595373 | 0.561776 | Carmil2     |
| GO_BP_m3GO:003112rRNA 3'-er1/539    | 12/23843  | 0.240011 | 0.595373 | 0.561776 | Exosc6      |
| GO_BP_m3GO:003114anaphase-1/539     | 12/23843  | 0.240011 | 0.595373 | 0.561776 | Ube2c       |
| GO_BP_m3GO:003227luteinizing 1/539  | 12/23843  | 0.240011 | 0.595373 | 0.561776 | Ucn2        |
| GO_BP_m3GO:003230positive re1/539   | 12/23843  | 0.240011 | 0.595373 | 0.561776 | Oxt         |
| GO_BP_m3GO:003235negative re1/539   | 12/23843  | 0.240011 | 0.595373 | 0.561776 | Bmp2        |
| GO_BP_m3GO:003272positive re1/539   | 12/23843  | 0.240011 | 0.595373 | 0.561776 | Il17d       |
| GO_BP_m3GO:003275positive re1/539   | 12/23843  | 0.240011 | 0.595373 | 0.561776 | Prkc        |
| GO_BP_m3GO:003308regulation 1/539   | 12/23843  | 0.240011 | 0.595373 | 0.561776 | lh          |
| GO_BP_m3GO:003328response tr1/539   | 12/23843  | 0.240011 | 0.595373 | 0.561776 | Pdia3       |
| GO_BP_m3GO:003352histone H2 1/539   | 12/23843  | 0.240011 | 0.595373 | 0.561776 | Ctr9        |
| GO_BP_m3GO:003362regulation 1/539   | 12/23843  | 0.240011 | 0.595373 | 0.561776 | Foxc2       |
| GO_BP_m3GO:003509maintenan1/539     | 12/23843  | 0.240011 | 0.595373 | 0.561776 | Pdzd11      |
| GO_BP_m3GO:003535regulation 1/539   | 12/23843  | 0.240011 | 0.595373 | 0.561776 | Twist1      |
| GO_BP_m3GO:003575regulation 1/539   | 12/23843  | 0.240011 | 0.595373 | 0.561776 | Lrrk2       |

|                   |               |        |           |          |          |          |             |
|-------------------|---------------|--------|-----------|----------|----------|----------|-------------|
| GO_BP_m3GO:003581 | positive re   | 1/539  | 12/23843  | 0.240011 | 0.595373 | 0.561776 | Tfap2b      |
| GO_BP_m3GO:003631 | cellular res  | 1/539  | 12/23843  | 0.240011 | 0.595373 | 0.561776 | Ptch1       |
| GO_BP_m3GO:004331 | neutrophil    | 1/539  | 12/23843  | 0.240011 | 0.595373 | 0.561776 | Abr         |
| GO_BP_m3GO:004337 | CD8-positi    | 1/539  | 12/23843  | 0.240011 | 0.595373 | 0.561776 | Satb1       |
| GO_BP_m3GO:004582 | negative re   | 1/539  | 12/23843  | 0.240011 | 0.595373 | 0.561776 | Irf3        |
| GO_BP_m3GO:004595 | negative re   | 1/539  | 12/23843  | 0.240011 | 0.595373 | 0.561776 | Syt4        |
| GO_BP_m3GO:004692 | negative re   | 1/539  | 12/23843  | 0.240011 | 0.595373 | 0.561776 | Syt4        |
| GO_BP_m3GO:006012 | positive re   | 1/539  | 12/23843  | 0.240011 | 0.595373 | 0.561776 | Ghrhr       |
| GO_BP_m3GO:006057 | cell fate sp  | 1/539  | 12/23843  | 0.240011 | 0.595373 | 0.561776 | Nkx6-1      |
| GO_BP_m3GO:006146 | regulation    | 1/539  | 12/23843  | 0.240011 | 0.595373 | 0.561776 | Ptprn       |
| GO_BP_m3GO:007026 | peptidyl-se   | 1/539  | 12/23843  | 0.240011 | 0.595373 | 0.561776 | Dusp26      |
| GO_BP_m3GO:007097 | interleukin   | 1/539  | 12/23843  | 0.240011 | 0.595373 | 0.561776 | Carmil2     |
| GO_BP_m3GO:007129 | cellular res  | 1/539  | 12/23843  | 0.240011 | 0.595373 | 0.561776 | Pdia3       |
| GO_BP_m3GO:007204 | collecting c  | 1/539  | 12/23843  | 0.240011 | 0.595373 | 0.561776 | Tfap2b      |
| GO_BP_m3GO:009704 | motor neur    | 1/539  | 12/23843  | 0.240011 | 0.595373 | 0.561776 | Crlf1       |
| GO_BP_m3GO:190022 | regulation    | 1/539  | 12/23843  | 0.240011 | 0.595373 | 0.561776 | Atat1       |
| GO_BP_m3GO:190271 | positive re   | 1/539  | 12/23843  | 0.240011 | 0.595373 | 0.561776 | Carmil2     |
| GO_BP_m3GO:190290 | negative re   | 1/539  | 12/23843  | 0.240011 | 0.595373 | 0.561776 | Lrrk2       |
| GO_BP_m3GO:190302 | regulation    | 1/539  | 12/23843  | 0.240011 | 0.595373 | 0.561776 | Hes1        |
| GO_BP_m3GO:190481 | positive re   | 1/539  | 12/23843  | 0.240011 | 0.595373 | 0.561776 | Gnl3l       |
| GO_BP_m3GO:190486 | excitatory e  | 1/539  | 12/23843  | 0.240011 | 0.595373 | 0.561776 | Nlgn1       |
| GO_BP_m3GO:190551 | positive re   | 1/539  | 12/23843  | 0.240011 | 0.595373 | 0.561776 | Fam170b     |
| GO_BP_m3GO:200000 | negative re   | 1/539  | 12/23843  | 0.240011 | 0.595373 | 0.561776 | Gpm6b       |
| GO_BP_m3GO:200034 | regulation    | 1/539  | 12/23843  | 0.240011 | 0.595373 | 0.561776 | Ccl5        |
| GO_BP_m3GO:200105 | negative re   | 1/539  | 12/23843  | 0.240011 | 0.595373 | 0.561776 | Gdf5        |
| GO_BP_m3GO:006027 | cilium asse   | 9/539  | 300/23843 | 0.240176 | 0.595373 | 0.561776 | 1110004E0   |
| GO_BP_m3GO:000648 | protein N-    | 3/539  | 75/23843  | 0.240506 | 0.595373 | 0.561776 | D730048I0   |
| GO_BP_m3GO:003314 | regulation    | 3/539  | 75/23843  | 0.240506 | 0.595373 | 0.561776 | Ghrhr/Kdm   |
| GO_BP_m3GO:004568 | regulation    | 3/539  | 75/23843  | 0.240506 | 0.595373 | 0.561776 | Hes1/Prkcf  |
| GO_BP_m3GO:005067 | regulation    | 10/539 | 340/23843 | 0.242328 | 0.599539 | 0.565707 | Bmp2/Ccl5   |
| GO_BP_m3GO:004254 | response tr   | 4/539  | 111/23843 | 0.242933 | 0.600344 | 0.566466 | Ankzf1/Cry  |
| GO_BP_m3GO:190121 | positive re   | 4/539  | 111/23843 | 0.242933 | 0.600344 | 0.566466 | Grik2/Ptpn  |
| GO_BP_m3GO:005114 | regulation    | 5/539  | 148/23843 | 0.243997 | 0.602626 | 0.568619 | Bmp2/Ctdg   |
| GO_BP_m3GO:004873 | gland deve    | 13/539 | 460/23843 | 0.244167 | 0.602699 | 0.568688 | Aire/Areg/l |
| GO_BP_m3GO:004001 | positive re   | 2/539  | 42/23843  | 0.245403 | 0.603648 | 0.569584 | Ghrhr/Mkk   |
| GO_BP_m3GO:004207 | intraciliary  | 2/539  | 42/23843  | 0.245403 | 0.603648 | 0.569584 | Cep131/Ttr  |
| GO_BP_m3GO:004230 | positive re   | 2/539  | 42/23843  | 0.245403 | 0.603648 | 0.569584 | Lrrk2/Ptpn! |
| GO_BP_m3GO:004250 | serine pho    | 2/539  | 42/23843  | 0.245403 | 0.603648 | 0.569584 | Gm13287/l   |
| GO_BP_m3GO:000718 | adenylate c   | 6/539  | 186/23843 | 0.245602 | 0.603648 | 0.569584 | Adm2/Ghrl   |
| GO_BP_m3GO:000956 | fertilization | 6/539  | 186/23843 | 0.245602 | 0.603648 | 0.569584 | Adam24/Bt   |
| GO_BP_m3GO:007099 | neuron de     | 11/539 | 381/23843 | 0.246138 | 0.603648 | 0.569584 | Bag5/Bcl2l  |
| GO_BP_m3GO:000175 | somitogen     | 3/539  | 76/23843  | 0.246553 | 0.603648 | 0.569584 | Axin2/Foxc  |
| GO_BP_m3GO:000683 | dicarboxyli   | 3/539  | 76/23843  | 0.246553 | 0.603648 | 0.569584 | Avp/Slc19a  |
| GO_BP_m3GO:004352 | positive re   | 3/539  | 76/23843  | 0.246553 | 0.603648 | 0.569584 | Grik2/Ptprf |
| GO_BP_m3GO:005193 | catecholam    | 3/539  | 76/23843  | 0.246553 | 0.603648 | 0.569584 | Chrna4/Ox   |
| GO_BP_m3GO:006118 | mammary       | 3/539  | 76/23843  | 0.246553 | 0.603648 | 0.569584 | Areg/Foxf1  |
| GO_BP_m3GO:190332 | negative re   | 3/539  | 76/23843  | 0.246553 | 0.603648 | 0.569584 | Bag5/Gnl3l  |
| GO_BP_m3GO:000228 | T cell activ  | 4/539  | 112/23843 | 0.247843 | 0.603648 | 0.569584 | Cd46/Gm1    |

|                                          |           |          |          |          |             |
|------------------------------------------|-----------|----------|----------|----------|-------------|
| GO_BP_m3GO:004247odontogen4/539          | 112/23843 | 0.247843 | 0.603648 | 0.569584 | Axin2/Bmp   |
| GO_BP_m3GO:000669steroid bio:5/539       | 149/23843 | 0.248215 | 0.603648 | 0.569584 | Bmp2/Dhcr   |
| GO_BP_m3GO:001038regulation 3/539        | 77/23843  | 0.252623 | 0.603648 | 0.569584 | Fanci/ler3/ |
| GO_BP_m3GO:009027positive re:4/539       | 113/23843 | 0.252775 | 0.603648 | 0.569584 | Ghrhr/Gip/  |
| GO_BP_m3GO:005067positive re:6/539       | 188/23843 | 0.253117 | 0.603648 | 0.569584 | Bmp2/Ccl5   |
| GO_BP_m3GO:190121regulation 10/539       | 344/23843 | 0.253267 | 0.603648 | 0.569584 | Bcl2l1/Ccl5 |
| GO_BP_m3GO:000156branching 2/539         | 43/23843  | 0.253815 | 0.603648 | 0.569584 | Foxc2/Ihh   |
| GO_BP_m3GO:003111negative re:2/539       | 43/23843  | 0.253815 | 0.603648 | 0.569584 | Ckap2/Sgk   |
| GO_BP_m3GO:004885brain morph:2/539       | 43/23843  | 0.253815 | 0.603648 | 0.569584 | Mkks/Otx1   |
| GO_BP_m3GO:006164histone H3 2/539        | 43/23843  | 0.253815 | 0.603648 | 0.569584 | Kdm4b/Kdm   |
| GO_BP_m3GO:007138cellular res:2/539      | 43/23843  | 0.253815 | 0.603648 | 0.569584 | Myod1/Sgl   |
| GO_BP_m3GO:004477cell cycle p 11/539     | 384/23843 | 0.253917 | 0.603648 | 0.569584 | Atf5/Ctdp1  |
| GO_BP_m3GO:00147C striated muscle:12/539 | 424/23843 | 0.253966 | 0.603648 | 0.569584 | Bmp2/Cdo    |
| GO_BP_m3GO:000975hormone-r:6/539         | 189/23843 | 0.256897 | 0.603648 | 0.569584 | Ghrhr/Kdm   |
| GO_BP_m3GO:190303positive re:6/539       | 189/23843 | 0.256897 | 0.603648 | 0.569584 | Ccl5/Cd46/  |
| GO_BP_m3GO:000155luteinization 1/539     | 13/23843  | 0.257201 | 0.603648 | 0.569584 | Ptpn        |
| GO_BP_m3GO:000208regulation 1/539        | 13/23843  | 0.257201 | 0.603648 | 0.569584 | Nlgn1       |
| GO_BP_m3GO:000251T cell toler:1/539      | 13/23843  | 0.257201 | 0.603648 | 0.569584 | Aire        |
| GO_BP_m3GO:000255mast cell cl:1/539      | 13/23843  | 0.257201 | 0.603648 | 0.569584 | Ccl5        |
| GO_BP_m3GO:000317mitral valve:1/539      | 13/23843  | 0.257201 | 0.603648 | 0.569584 | Twist1      |
| GO_BP_m3GO:000626mitochondrion:1/539     | 13/23843  | 0.257201 | 0.603648 | 0.569584 | Mgme1       |
| GO_BP_m3GO:000686nucleotide 1/539        | 13/23843  | 0.257201 | 0.603648 | 0.569584 | Slc25a17    |
| GO_BP_m3GO:00071C mitotic cen:1/539      | 13/23843  | 0.257201 | 0.603648 | 0.569584 | Ranbp3l     |
| GO_BP_m3GO:000761short-term 1/539        | 13/23843  | 0.257201 | 0.603648 | 0.569584 | Cux2        |
| GO_BP_m3GO:000943NAD biosyn:1/539        | 13/23843  | 0.257201 | 0.603648 | 0.569584 | Hk1         |
| GO_BP_m3GO:001035regulation 1/539        | 13/23843  | 0.257201 | 0.603648 | 0.569584 | Hk1         |
| GO_BP_m3GO:001905modulator 1/539         | 13/23843  | 0.257201 | 0.603648 | 0.569584 | Bcl2l1      |
| GO_BP_m3GO:002152spinal cord 1/539       | 13/23843  | 0.257201 | 0.603648 | 0.569584 | Nkx6-1      |
| GO_BP_m3GO:002192cell prolifer:1/539     | 13/23843  | 0.257201 | 0.603648 | 0.569584 | Atf5        |
| GO_BP_m3GO:002193cerebellar cell:1/539   | 13/23843  | 0.257201 | 0.603648 | 0.569584 | Atf5        |
| GO_BP_m3GO:003044regulation 1/539        | 13/23843  | 0.257201 | 0.603648 | 0.569584 | Cd46        |
| GO_BP_m3GO:003049fatty acid e:1/539      | 13/23843  | 0.257201 | 0.603648 | 0.569584 | Elovl2      |
| GO_BP_m3GO:003103myosin filam:1/539      | 13/23843  | 0.257201 | 0.603648 | 0.569584 | Mybpb       |
| GO_BP_m3GO:003111negative re:1/539       | 13/23843  | 0.257201 | 0.603648 | 0.569584 | Sgk1        |
| GO_BP_m3GO:003126pseudopoc:1/539         | 13/23843  | 0.257201 | 0.603648 | 0.569584 | Ccl5        |
| GO_BP_m3GO:003165positive re:1/539       | 13/23843  | 0.257201 | 0.603648 | 0.569584 | Ccl5        |
| GO_BP_m3GO:003227regulation 1/539        | 13/23843  | 0.257201 | 0.603648 | 0.569584 | Ucn2        |
| GO_BP_m3GO:00323C regulation 1/539       | 13/23843  | 0.257201 | 0.603648 | 0.569584 | Oxt         |
| GO_BP_m3GO:003235negative re:1/539       | 13/23843  | 0.257201 | 0.603648 | 0.569584 | Bmp2        |
| GO_BP_m3GO:003307immature 11/539         | 13/23843  | 0.257201 | 0.603648 | 0.569584 | Ihh         |
| GO_BP_m3GO:003406stress gran:1/539       | 13/23843  | 0.257201 | 0.603648 | 0.569584 | Atxn2       |
| GO_BP_m3GO:003574T-helper 2 1/539        | 13/23843  | 0.257201 | 0.603648 | 0.569584 | Prkcz       |
| GO_BP_m3GO:003809Fc receptor:1/539       | 13/23843  | 0.257201 | 0.603648 | 0.569584 | Pigr        |
| GO_BP_m3GO:004248positive re:1/539       | 13/23843  | 0.257201 | 0.603648 | 0.569584 | Bmp2        |
| GO_BP_m3GO:004253negative re:1/539       | 13/23843  | 0.257201 | 0.603648 | 0.569584 | Nf2         |
| GO_BP_m3GO:004276very long-term:1/539    | 13/23843  | 0.257201 | 0.603648 | 0.569584 | Elovl2      |
| GO_BP_m3GO:004454NLRP3 infl:1/539        | 13/23843  | 0.257201 | 0.603648 | 0.569584 | Atat1       |
| GO_BP_m3GO:004513developme:1/539         | 13/23843  | 0.257201 | 0.603648 | 0.569584 | Areg        |

|                                     |           |          |          |          |             |
|-------------------------------------|-----------|----------|----------|----------|-------------|
| GO_BP_m3GO:004562regulation 1/539   | 13/23843  | 0.257201 | 0.603648 | 0.569584 | Prkcz       |
| GO_BP_m3GO:004593positive reg1/539  | 13/23843  | 0.257201 | 0.603648 | 0.569584 | Ghrhr       |
| GO_BP_m3GO:004645short-chain1/539   | 13/23843  | 0.257201 | 0.603648 | 0.569584 | Thns12      |
| GO_BP_m3GO:004660negative re1/539   | 13/23843  | 0.257201 | 0.603648 | 0.569584 | Ccnf        |
| GO_BP_m3GO:004834paraxial m1/539    | 13/23843  | 0.257201 | 0.603648 | 0.569584 | Foxc2       |
| GO_BP_m3GO:004848enteric ner1/539   | 13/23843  | 0.257201 | 0.603648 | 0.569584 | Sox10       |
| GO_BP_m3GO:004850regulation 1/539   | 13/23843  | 0.257201 | 0.603648 | 0.569584 | Hes1        |
| GO_BP_m3GO:004874regulation 1/539   | 13/23843  | 0.257201 | 0.603648 | 0.569584 | Myod1       |
| GO_BP_m3GO:004875branching 1/539    | 13/23843  | 0.257201 | 0.603648 | 0.569584 | Lrrk2       |
| GO_BP_m3GO:005119negative re1/539   | 13/23843  | 0.257201 | 0.603648 | 0.569584 | Ier3        |
| GO_BP_m3GO:005264alditol pho1/539   | 13/23843  | 0.257201 | 0.603648 | 0.569584 | Slc37a2     |
| GO_BP_m3GO:005269cellular glu1/539  | 13/23843  | 0.257201 | 0.603648 | 0.569584 | Ugt1a7c     |
| GO_BP_m3GO:006076negative re1/539   | 13/23843  | 0.257201 | 0.603648 | 0.569584 | Tcf21       |
| GO_BP_m3GO:007005neuron cell1/539   | 13/23843  | 0.257201 | 0.603648 | 0.569584 | Calb2       |
| GO_BP_m3GO:007094neutrophil 1/539   | 13/23843  | 0.257201 | 0.603648 | 0.569584 | Dnase1l3    |
| GO_BP_m3GO:007102nuclear RN1/539    | 13/23843  | 0.257201 | 0.603648 | 0.569584 | Exosc6      |
| GO_BP_m3GO:007102nuclear mR1/539    | 13/23843  | 0.257201 | 0.603648 | 0.569584 | Exosc6      |
| GO_BP_m3GO:007256chemokine 1/539    | 13/23843  | 0.257201 | 0.603648 | 0.569584 | Ccl5        |
| GO_BP_m3GO:009709presynaptic1/539   | 13/23843  | 0.257201 | 0.603648 | 0.569584 | Nlgn1       |
| GO_BP_m3GO:009905presynapse1/539    | 13/23843  | 0.257201 | 0.603648 | 0.569584 | Nlgn1       |
| GO_BP_m3GO:190012negative re1/539   | 13/23843  | 0.257201 | 0.603648 | 0.569584 | Ptprf       |
| GO_BP_m3GO:190183regulation 1/539   | 13/23843  | 0.257201 | 0.603648 | 0.569584 | Ippk        |
| GO_BP_m3GO:190233regulation 1/539   | 13/23843  | 0.257201 | 0.603648 | 0.569584 | Foxc2       |
| GO_BP_m3GO:190289negative re1/539   | 13/23843  | 0.257201 | 0.603648 | 0.569584 | Tgfbr1      |
| GO_BP_m3GO:200065negative re1/539   | 13/23843  | 0.257201 | 0.603648 | 0.569584 | Stoml1      |
| GO_BP_m3GO:200103regulation 1/539   | 13/23843  | 0.257201 | 0.603648 | 0.569584 | Kdm4d       |
| GO_BP_m3GO:200122negative re1/539   | 13/23843  | 0.257201 | 0.603648 | 0.569584 | Gpr173      |
| GO_BP_m3GO:200125regulation 1/539   | 13/23843  | 0.257201 | 0.603648 | 0.569584 | Stc2        |
| GO_BP_m3GO:000307regulation 4/539   | 114/23843 | 0.257728 | 0.604097 | 0.570008 | Avp/Ier3/N  |
| GO_BP_m3GO:009917postsynaps4/539    | 114/23843 | 0.257728 | 0.604097 | 0.570008 | Caprin1/Cu  |
| GO_BP_m3GO:004306extracellular8/539 | 267/23843 | 0.258651 | 0.604097 | 0.570008 | Adamts14/   |
| GO_BP_m3GO:000663acyl-CoA n3/539    | 78/23843  | 0.258715 | 0.604097 | 0.570008 | Dlat/Dld/Tl |
| GO_BP_m3GO:000859regulation 3/539   | 78/23843  | 0.258715 | 0.604097 | 0.570008 | Bend6/Cd4   |
| GO_BP_m3GO:003538thioester r3/539   | 78/23843  | 0.258715 | 0.604097 | 0.570008 | Dlat/Dld/Tl |
| GO_BP_m3GO:004870astrocyte d3/539   | 78/23843  | 0.258715 | 0.604097 | 0.570008 | Atf5/Bmp2   |
| GO_BP_m3GO:006041cardiac sep3/539   | 78/23843  | 0.258715 | 0.604097 | 0.570008 | Hes1/Mir19  |
| GO_BP_m3GO:007022regulation 3/539   | 78/23843  | 0.258715 | 0.604097 | 0.570008 | Ccl5/Mir10  |
| GO_BP_m3GO:004586negative re10/539  | 346/23843 | 0.258798 | 0.604097 | 0.570008 | 9230104L0   |
| GO_BP_m3GO:190370regulation 11/539  | 386/23843 | 0.259151 | 0.604592 | 0.570474 | Ankle1/Ccl  |
| GO_BP_m3GO:007122cellular res8/539  | 268/23843 | 0.26183  | 0.607243 | 0.572976 | Bcl2l1/Halr |
| GO_BP_m3GO:000669cholesterol 2/539  | 44/23843  | 0.262233 | 0.607243 | 0.572976 | Dhcr24/Tr   |
| GO_BP_m3GO:001908viral transc2/539  | 44/23843  | 0.262233 | 0.607243 | 0.572976 | Ccl5/Ctdp1  |
| GO_BP_m3GO:004275eating beh.2/539   | 44/23843  | 0.262233 | 0.607243 | 0.572976 | Oxt/Tacr1   |
| GO_BP_m3GO:004303regulation 2/539   | 44/23843  | 0.262233 | 0.607243 | 0.572976 | Lrrk2/Tff2  |
| GO_BP_m3GO:006161pri-miRNA 2/539    | 44/23843  | 0.262233 | 0.607243 | 0.572976 | Bmp2/Tgft   |
| GO_BP_m3GO:007023regulation 2/539   | 44/23843  | 0.262233 | 0.607243 | 0.572976 | Ccl5/Tsc22  |
| GO_BP_m3GO:000110response tr10/539  | 348/23843 | 0.26437  | 0.607243 | 0.572976 | Bcl2l1/Halr |
| GO_BP_m3GO:005125positive reg11/539 | 388/23843 | 0.264421 | 0.607243 | 0.572976 | Ccl5/Cd46/  |

|                                     |           |          |          |          |             |
|-------------------------------------|-----------|----------|----------|----------|-------------|
| GO_BP_m3GO:00032C cardiac ver 3/539 | 79/23843  | 0.264826 | 0.607243 | 0.572976 | Foxc2/Foxf  |
| GO_BP_m3GO:003304regulation 3/539   | 79/23843  | 0.264826 | 0.607243 | 0.572976 | Axin2/Mad   |
| GO_BP_m3GO:19039C negative re3/539  | 79/23843  | 0.264826 | 0.607243 | 0.572976 | Ccl5/Isg20/ |
| GO_BP_m3GO:000647protein de7/539    | 230/23843 | 0.265507 | 0.607243 | 0.572976 | Ctdp1/Dus   |
| GO_BP_m3GO:007066regulation 7/539   | 230/23843 | 0.265507 | 0.607243 | 0.572976 | Btn1a1/Ccl  |
| GO_BP_m3GO:00516C protein ma9/539   | 309/23843 | 0.266581 | 0.607243 | 0.572976 | Cd46/Dhcr   |
| GO_BP_m3GO:00149C myotube d4/539    | 116/23843 | 0.267688 | 0.607243 | 0.572976 | Cdon/Myo    |
| GO_BP_m3GO:00015C regulation 9/539  | 310/23843 | 0.26957  | 0.607243 | 0.572976 | Bcl2l1/Gcsf |
| GO_BP_m3GO:00019C regulation 2/539  | 45/23843  | 0.270653 | 0.607243 | 0.572976 | Ndst2/Tacr  |
| GO_BP_m3GO:001046regulation 2/539   | 45/23843  | 0.270653 | 0.607243 | 0.572976 | Foxf1/Ihh   |
| GO_BP_m3GO:001922neuronal a2/539    | 45/23843  | 0.270653 | 0.607243 | 0.572976 | Grik2/Kcnn  |
| GO_BP_m3GO:00308E negative re2/539  | 45/23843  | 0.270653 | 0.607243 | 0.572976 | Hes1/Tgfb   |
| GO_BP_m3GO:00459C positive re2/539  | 45/23843  | 0.270653 | 0.607243 | 0.572976 | Avp/Tacr1   |
| GO_BP_m3GO:00507C activated T2/539  | 45/23843  | 0.270653 | 0.607243 | 0.572976 | Btn1a1/Sat  |
| GO_BP_m3GO:00519E regulation 2/539  | 45/23843  | 0.270653 | 0.607243 | 0.572976 | Avp/Syt4    |
| GO_BP_m3GO:006076positive re2/539   | 45/23843  | 0.270653 | 0.607243 | 0.572976 | C1qtnf4/Tr  |
| GO_BP_m3GO:007124cellular res2/539  | 45/23843  | 0.270653 | 0.607243 | 0.572976 | Chrna4/Lrr  |
| GO_BP_m3GO:00713E cellular res2/539 | 45/23843  | 0.270653 | 0.607243 | 0.572976 | Myod1/Sgl   |
| GO_BP_m3GO:00901C regulation 2/539  | 45/23843  | 0.270653 | 0.607243 | 0.572976 | Avp/Bcl2l1  |
| GO_BP_m3GO:000227myeloid ce3/539    | 80/23843  | 0.270954 | 0.607243 | 0.572976 | Abr/Dnase   |
| GO_BP_m3GO:00031E outflow tra3/539  | 80/23843  | 0.270954 | 0.607243 | 0.572976 | Foxc2/Hes1  |
| GO_BP_m3GO:001491regulation 3/539   | 80/23843  | 0.270954 | 0.607243 | 0.572976 | Ccl5/P2ry6. |
| GO_BP_m3GO:002167nerve deve3/539    | 80/23843  | 0.270954 | 0.607243 | 0.572976 | Hes1/Neur   |
| GO_BP_m3GO:00350E embryonic 3/539   | 80/23843  | 0.270954 | 0.607243 | 0.572976 | Foxc2/Hes1  |
| GO_BP_m3GO:00703C cellular res3/539 | 80/23843  | 0.270954 | 0.607243 | 0.572976 | Ankzf1/Lrrf |
| GO_BP_m3GO:009866inorganic a3/539   | 80/23843  | 0.270954 | 0.607243 | 0.572976 | Clcn1/Slc12 |
| GO_BP_m3GO:00550C muscle cell6/539  | 193/23843 | 0.272168 | 0.607243 | 0.572976 | Ctdp1/Finc  |
| GO_BP_m3GO:199082response tr9/539   | 311/23843 | 0.272568 | 0.607243 | 0.572976 | Adam23/N    |
| GO_BP_m3GO:199083cellular res9/539  | 311/23843 | 0.272568 | 0.607243 | 0.572976 | Adam23/N    |
| GO_BP_m3GO:00510C positive re4/539  | 117/23843 | 0.272695 | 0.607243 | 0.572976 | Map3k13/F   |
| GO_BP_m3GO:00609C dendritic s4/539  | 117/23843 | 0.272695 | 0.607243 | 0.572976 | Caprin1/Cu  |
| GO_BP_m3GO:190037regulation 4/539   | 117/23843 | 0.272695 | 0.607243 | 0.572976 | Avp/Bcl2l1. |
| GO_BP_m3GO:004887multicellul10/539  | 351/23843 | 0.272799 | 0.607243 | 0.572976 | Avp/Ccl5/C  |
| GO_BP_m3GO:00199C cyclic-nucl5/539  | 155/23843 | 0.273893 | 0.607243 | 0.572976 | Adm2/Ghrl   |
| GO_BP_m3GO:000166fever gene1/539    | 14/23843  | 0.274002 | 0.607243 | 0.572976 | Ccl5        |
| GO_BP_m3GO:000272positive re1/539   | 14/23843  | 0.274002 | 0.607243 | 0.572976 | Prkcz       |
| GO_BP_m3GO:00031E morphoge1/539     | 14/23843  | 0.274002 | 0.607243 | 0.572976 | Rhob        |
| GO_BP_m3GO:000606uronic acid1/539   | 14/23843  | 0.274002 | 0.607243 | 0.572976 | Ugt1a7c     |
| GO_BP_m3GO:000654glycine me1/539    | 14/23843  | 0.274002 | 0.607243 | 0.572976 | Gcsh        |
| GO_BP_m3GO:000926deoxyribor1/539    | 14/23843  | 0.274002 | 0.607243 | 0.572976 | Rrm2        |
| GO_BP_m3GO:001071regulation 1/539   | 14/23843  | 0.274002 | 0.607243 | 0.572976 | Carmil2     |
| GO_BP_m3GO:001087positive re1/539   | 14/23843  | 0.274002 | 0.607243 | 0.572976 | Ptch1       |
| GO_BP_m3GO:001607snoRNA m1/539      | 14/23843  | 0.274002 | 0.607243 | 0.572976 | Exosc6      |
| GO_BP_m3GO:00195E glucuronat1/539   | 14/23843  | 0.274002 | 0.607243 | 0.572976 | Ugt1a7c     |
| GO_BP_m3GO:002153cell prolifer1/539 | 14/23843  | 0.274002 | 0.607243 | 0.572976 | Atf5        |
| GO_BP_m3GO:00217C cerebellar f1/539 | 14/23843  | 0.274002 | 0.607243 | 0.572976 | Atxn2       |
| GO_BP_m3GO:00219C rostrocaud1/539   | 14/23843  | 0.274002 | 0.607243 | 0.572976 | Hes1        |
| GO_BP_m3GO:003081negative re1/539   | 14/23843  | 0.274002 | 0.607243 | 0.572976 | Ier3        |

|                                      |           |          |          |          |             |
|--------------------------------------|-----------|----------|----------|----------|-------------|
| GO_BP_m3GO:003263granulocyte1/539    | 14/23843  | 0.274002 | 0.607243 | 0.572976 | Il17d       |
| GO_BP_m3GO:003264regulation 1/539    | 14/23843  | 0.274002 | 0.607243 | 0.572976 | Il17d       |
| GO_BP_m3GO:003273positive reg1/539   | 14/23843  | 0.274002 | 0.607243 | 0.572976 | Prkcz       |
| GO_BP_m3GO:003312regulation 1/539    | 14/23843  | 0.274002 | 0.607243 | 0.572976 | Twist1      |
| GO_BP_m3GO:003434glial cell ap1/539  | 14/23843  | 0.274002 | 0.607243 | 0.572976 | Prkch       |
| GO_BP_m3GO:003475iron ion tra1/539   | 14/23843  | 0.274002 | 0.607243 | 0.572976 | Hamp2       |
| GO_BP_m3GO:003598chondrocyt1/539     | 14/23843  | 0.274002 | 0.607243 | 0.572976 | Ihh         |
| GO_BP_m3GO:004506negative th1/539    | 14/23843  | 0.274002 | 0.607243 | 0.572976 | Aire        |
| GO_BP_m3GO:004518regulation 1/539    | 14/23843  | 0.274002 | 0.607243 | 0.572976 | Ghrhr       |
| GO_BP_m3GO:004560negative re1/539    | 14/23843  | 0.274002 | 0.607243 | 0.572976 | Hes1        |
| GO_BP_m3GO:004561positive reg1/539   | 14/23843  | 0.274002 | 0.607243 | 0.572976 | Prkch       |
| GO_BP_m3GO:004579negative re1/539    | 14/23843  | 0.274002 | 0.607243 | 0.572976 | Ucn         |
| GO_BP_m3GO:004853mucosal-a1/539      | 14/23843  | 0.274002 | 0.607243 | 0.572976 | Nkx2-3      |
| GO_BP_m3GO:004854Peyer's pat1/539    | 14/23843  | 0.274002 | 0.607243 | 0.572976 | Nkx2-3      |
| GO_BP_m3GO:005085regulation 1/539    | 14/23843  | 0.274002 | 0.607243 | 0.572976 | Prkch       |
| GO_BP_m3GO:005086positive reg1/539   | 14/23843  | 0.274002 | 0.607243 | 0.572976 | Usp12       |
| GO_BP_m3GO:005129centrosom1/539      | 14/23843  | 0.274002 | 0.607243 | 0.572976 | Ranbp3l     |
| GO_BP_m3GO:006001radial glial 1/539  | 14/23843  | 0.274002 | 0.607243 | 0.572976 | Hes1        |
| GO_BP_m3GO:006039positive reg1/539   | 14/23843  | 0.274002 | 0.607243 | 0.572976 | Tgfb1       |
| GO_BP_m3GO:006083smoothene1/539      | 14/23843  | 0.274002 | 0.607243 | 0.572976 | Ptch1       |
| GO_BP_m3GO:006115endothelial1/539    | 14/23843  | 0.274002 | 0.607243 | 0.572976 | Rhob        |
| GO_BP_m3GO:006131renal filtrat1/539  | 14/23843  | 0.274002 | 0.607243 | 0.572976 | Foxc2       |
| GO_BP_m3GO:007030lens fiber c1/539   | 14/23843  | 0.274002 | 0.607243 | 0.572976 | Cryaa       |
| GO_BP_m3GO:007138cellular res1/539   | 14/23843  | 0.274002 | 0.607243 | 0.572976 | P2ry6       |
| GO_BP_m3GO:007211glomerular1/539     | 14/23843  | 0.274002 | 0.607243 | 0.572976 | Foxc2       |
| GO_BP_m3GO:007222metaneph1/539       | 14/23843  | 0.274002 | 0.607243 | 0.572976 | Tcf21       |
| GO_BP_m3GO:007231glomerular1/539     | 14/23843  | 0.274002 | 0.607243 | 0.572976 | Foxc2       |
| GO_BP_m3GO:007257neurotrans1/539     | 14/23843  | 0.274002 | 0.607243 | 0.572976 | Nlgn1       |
| GO_BP_m3GO:009026regulation 1/539    | 14/23843  | 0.274002 | 0.607243 | 0.572976 | Mad211      |
| GO_BP_m3GO:009715GABAergic1/539      | 14/23843  | 0.274002 | 0.607243 | 0.572976 | Helt        |
| GO_BP_m3GO:009753mast cell r1/539    | 14/23843  | 0.274002 | 0.607243 | 0.572976 | Ccl5        |
| GO_BP_m3GO:009906postsynaps1/539     | 14/23843  | 0.274002 | 0.607243 | 0.572976 | Nlgn1       |
| GO_BP_m3GO:014013positive reg1/539   | 14/23843  | 0.274002 | 0.607243 | 0.572976 | Ccl5        |
| GO_BP_m3GO:190230negative re1/539    | 14/23843  | 0.274002 | 0.607243 | 0.572976 | Stoml1      |
| GO_BP_m3GO:190343negative re1/539    | 14/23843  | 0.274002 | 0.607243 | 0.572976 | Dleu2       |
| GO_BP_m3GO:190350regulation 1/539    | 14/23843  | 0.274002 | 0.607243 | 0.572976 | Mad211      |
| GO_BP_m3GO:190474regulation 1/539    | 14/23843  | 0.274002 | 0.607243 | 0.572976 | Foxc2       |
| GO_BP_m3GO:190481regulation 1/539    | 14/23843  | 0.274002 | 0.607243 | 0.572976 | Gnl3l       |
| GO_BP_m3GO:200025negative re1/539    | 14/23843  | 0.274002 | 0.607243 | 0.572976 | Ucn         |
| GO_BP_m3GO:200025regulation 1/539    | 14/23843  | 0.274002 | 0.607243 | 0.572976 | Cd46        |
| GO_BP_m3GO:000030response tr6/539    | 194/23843 | 0.276021 | 0.609662 | 0.575258 | Ankzf1/Cry  |
| GO_BP_m3GO:000301vascular pr6/539    | 194/23843 | 0.276021 | 0.609662 | 0.575258 | Abr/Avp/Fc  |
| GO_BP_m3GO:003134negative re6/539    | 194/23843 | 0.276021 | 0.609662 | 0.575258 | Bag5/Dleu1  |
| GO_BP_m3GO:000687cellular calc12/539 | 433/23843 | 0.276613 | 0.609662 | 0.575258 | Avp/Calb2,  |
| GO_BP_m3GO:000328ventricular 3/539   | 81/23843  | 0.277098 | 0.609662 | 0.575258 | Hes1/Mir19  |
| GO_BP_m3GO:000647protein de3/539     | 81/23843  | 0.277098 | 0.609662 | 0.575258 | Jdp2/Lrrk2, |
| GO_BP_m3GO:001590fatty acid tr3/539  | 81/23843  | 0.277098 | 0.609662 | 0.575258 | Oxt/Slc25a  |
| GO_BP_m3GO:009758lamellipodi3/539    | 81/23843  | 0.277098 | 0.609662 | 0.575258 | Ablim3/Cal  |

|                                    |           |          |          |          |             |
|------------------------------------|-----------|----------|----------|----------|-------------|
| GO_BP_m3GO:190406negative re3/539  | 81/23843  | 0.277098 | 0.609662 | 0.575258 | Hamp2/Stc   |
| GO_BP_m3GO:000627regulation 4/539  | 118/23843 | 0.277717 | 0.609662 | 0.575258 | Areg/Enpp   |
| GO_BP_m3GO:000858male gona4/539    | 118/23843 | 0.277717 | 0.609662 | 0.575258 | Bcl2l1/Tcf2 |
| GO_BP_m3GO:003080regulation 4/539  | 118/23843 | 0.277717 | 0.609662 | 0.575258 | Avp/Bcl2l1, |
| GO_BP_m3GO:003315regulation 8/539  | 273/23843 | 0.277895 | 0.609662 | 0.575258 | Ablim3/Ce1  |
| GO_BP_m3GO:005134negative re8/539  | 273/23843 | 0.277895 | 0.609662 | 0.575258 | Bag5/Dusp   |
| GO_BP_m3GO:004580positive re5/539  | 156/23843 | 0.278228 | 0.609662 | 0.575258 | Abr/Bcl2l1/ |
| GO_BP_m3GO:004688positive re5/539  | 156/23843 | 0.278228 | 0.609662 | 0.575258 | Ghrhr/Gip/  |
| GO_BP_m3GO:000232natural kill2/539 | 46/23843  | 0.27907  | 0.609662 | 0.575258 | Gm13287/l   |
| GO_BP_m3GO:000317heart valve 2/539 | 46/23843  | 0.27907  | 0.609662 | 0.575258 | Bmp2/Twis   |
| GO_BP_m3GO:001071regulation 2/539  | 46/23843  | 0.27907  | 0.609662 | 0.575258 | lhh/Ucn     |
| GO_BP_m3GO:002177olfactory b 2/539 | 46/23843  | 0.27907  | 0.609662 | 0.575258 | Atf5/Lrrk2  |
| GO_BP_m3GO:004853spleen dev2/539   | 46/23843  | 0.27907  | 0.609662 | 0.575258 | Nkx2-3/Tc1  |
| GO_BP_m3GO:005148regulation 2/539  | 46/23843  | 0.27907  | 0.609662 | 0.575258 | Nlgn1/Tgft  |
| GO_BP_m3GO:190265secondary 2/539   | 46/23843  | 0.27907  | 0.609662 | 0.575258 | Dhcr24/Tnr  |
| GO_BP_m3GO:200116regulation 2/539  | 46/23843  | 0.27907  | 0.609662 | 0.575258 | Bcl2l1/ler3 |
| GO_BP_m3GO:200122regulation 2/539  | 46/23843  | 0.27907  | 0.609662 | 0.575258 | Gpr173/Nk   |
| GO_BP_m3GO:000269positive re12/539 | 435/23843 | 0.281732 | 0.609662 | 0.575258 | Ccl5/Cd46/  |
| GO_BP_m3GO:004340steroid hor5/539  | 157/23843 | 0.282576 | 0.609662 | 0.575258 | Ghrhr/Kdm   |
| GO_BP_m3GO:000820cholesterol4/539  | 119/23843 | 0.282754 | 0.609662 | 0.575258 | Dhcr24/Fd3  |
| GO_BP_m3GO:003243regulation 4/539  | 119/23843 | 0.282754 | 0.609662 | 0.575258 | Bag5/Lrrk2  |
| GO_BP_m3GO:004348regulation 4/539  | 119/23843 | 0.282754 | 0.609662 | 0.575258 | Celf5/Khdr1 |
| GO_BP_m3GO:004654developme4/539    | 119/23843 | 0.282754 | 0.609662 | 0.575258 | Bcl2l1/Tcf2 |
| GO_BP_m3GO:003070cytoskeletc5/539  | 158/23843 | 0.286937 | 0.609662 | 0.575258 | Ap3s1/BC0   |
| GO_BP_m3GO:003582modificatic5/539  | 158/23843 | 0.286937 | 0.609662 | 0.575258 | Bcl2l1/Ccl5 |
| GO_BP_m3GO:000269regulation 10/539 | 356/23843 | 0.287025 | 0.609662 | 0.575258 | Abr/Ccl5/C  |
| GO_BP_m3GO:000636transcriptic2/539 | 47/23843  | 0.287479 | 0.609662 | 0.575258 | Ctr9/Sox10  |
| GO_BP_m3GO:001657histone ubi2/539  | 47/23843  | 0.287479 | 0.609662 | 0.575258 | Ctr9/Uhrf1  |
| GO_BP_m3GO:002153neural tub2/539   | 47/23843  | 0.287479 | 0.609662 | 0.575258 | Hes1/Ptch1  |
| GO_BP_m3GO:004224tissue rege 2/539 | 47/23843  | 0.287479 | 0.609662 | 0.575258 | Myod1/My    |
| GO_BP_m3GO:004521sarcomere 2/539   | 47/23843  | 0.287479 | 0.609662 | 0.575258 | Mybph/Tnr   |
| GO_BP_m3GO:009858cellular res2/539 | 47/23843  | 0.287479 | 0.609662 | 0.575258 | Bcl2l1/Trim |
| GO_BP_m3GO:009960regulation 2/539  | 47/23843  | 0.287479 | 0.609662 | 0.575258 | Chrna4/Nlq  |
| GO_BP_m3GO:190459positive re2/539  | 47/23843  | 0.287479 | 0.609662 | 0.575258 | Lrrk2/Ptpn! |
| GO_BP_m3GO:001095regulation 11/539 | 397/23843 | 0.288556 | 0.609662 | 0.575258 | Ccl5/Hamp   |
| GO_BP_m3GO:003243positive re3/539  | 83/23843  | 0.289424 | 0.609662 | 0.575258 | Lrrk2/Rnf14 |
| GO_BP_m3GO:003276positive re3/539  | 83/23843  | 0.289424 | 0.609662 | 0.575258 | C1qtnf4/Lr  |
| GO_BP_m3GO:190007regulation 3/539  | 83/23843  | 0.289424 | 0.609662 | 0.575258 | Prkcz/Ptpre |
| GO_BP_m3GO:000007DNA replic1/539   | 15/23843  | 0.290423 | 0.609662 | 0.575258 | Oraov1      |
| GO_BP_m3GO:000029nuclear-tra1/539  | 15/23843  | 0.290423 | 0.609662 | 0.575258 | Exosc6      |
| GO_BP_m3GO:000232immature 1/539    | 15/23843  | 0.290423 | 0.609662 | 0.575258 | Mir19a      |
| GO_BP_m3GO:000283positive re1/539  | 15/23843  | 0.290423 | 0.609662 | 0.575258 | Prkcz       |
| GO_BP_m3GO:000318heart valve 1/539 | 15/23843  | 0.290423 | 0.609662 | 0.575258 | Twist1      |
| GO_BP_m3GO:000668sphingomy1/539    | 15/23843  | 0.290423 | 0.609662 | 0.575258 | Enpp7       |
| GO_BP_m3GO:000670glucocortic1/539  | 15/23843  | 0.290423 | 0.609662 | 0.575258 | Bmp2        |
| GO_BP_m3GO:000692activation- 1/539 | 15/23843  | 0.290423 | 0.609662 | 0.575258 | Tsc22d3     |
| GO_BP_m3GO:000728sperm axor1/539   | 15/23843  | 0.290423 | 0.609662 | 0.575258 | Cep131      |
| GO_BP_m3GO:001017embryonic 1/539   | 15/23843  | 0.290423 | 0.609662 | 0.575258 | Cdon        |



|                   |              |       |          |          |          |          |         |
|-------------------|--------------|-------|----------|----------|----------|----------|---------|
| GO_BP_m3GO:001096 | magnesium    | 1/539 | 15/23843 | 0.290423 | 0.609662 | 0.575258 | Tfap2b  |
| GO_BP_m3GO:001406 | negative re  | 1/539 | 15/23843 | 0.290423 | 0.609662 | 0.575258 | Twist1  |
| GO_BP_m3GO:003015 | pancreatic   | 1/539 | 15/23843 | 0.290423 | 0.609662 | 0.575258 | Ucn     |
| GO_BP_m3GO:003126 | pseudopoc    | 1/539 | 15/23843 | 0.290423 | 0.609662 | 0.575258 | Ccl5    |
| GO_BP_m3GO:003157 | intra-S DN   | 1/539 | 15/23843 | 0.290423 | 0.609662 | 0.575258 | Oraov1  |
| GO_BP_m3GO:003165 | regulation   | 1/539 | 15/23843 | 0.290423 | 0.609662 | 0.575258 | Ccl5    |
| GO_BP_m3GO:003222 | regulation   | 1/539 | 15/23843 | 0.290423 | 0.609662 | 0.575258 | Tacr1   |
| GO_BP_m3GO:003308 | positive re  | 1/539 | 15/23843 | 0.290423 | 0.609662 | 0.575258 | Ihh     |
| GO_BP_m3GO:003564 | locomotor    | 1/539 | 15/23843 | 0.290423 | 0.609662 | 0.575258 | Lrrk2   |
| GO_BP_m3GO:004003 | regulation   | 1/539 | 15/23843 | 0.290423 | 0.609662 | 0.575258 | Hes1    |
| GO_BP_m3GO:004274 | circadian sl | 1/539 | 15/23843 | 0.290423 | 0.609662 | 0.575258 | Ghrhr   |
| GO_BP_m3GO:004279 | nucleolar l  | 1/539 | 15/23843 | 0.290423 | 0.609662 | 0.575258 | Ippk    |
| GO_BP_m3GO:004316 | ubiquitin-c  | 1/539 | 15/23843 | 0.290423 | 0.609662 | 0.575258 | Ubp1    |
| GO_BP_m3GO:004338 | negative T   | 1/539 | 15/23843 | 0.290423 | 0.609662 | 0.575258 | Aire    |
| GO_BP_m3GO:004351 | negative re  | 1/539 | 15/23843 | 0.290423 | 0.609662 | 0.575258 | Twist1  |
| GO_BP_m3GO:004432 | cellular res | 1/539 | 15/23843 | 0.290423 | 0.609662 | 0.575258 | Mkks    |
| GO_BP_m3GO:004514 | meiotic tel  | 1/539 | 15/23843 | 0.290423 | 0.609662 | 0.575258 | Ankle1  |
| GO_BP_m3GO:004576 | positive re  | 1/539 | 15/23843 | 0.290423 | 0.609662 | 0.575258 | Tacr1   |
| GO_BP_m3GO:004598 | positive re  | 1/539 | 15/23843 | 0.290423 | 0.609662 | 0.575258 | Ucn     |
| GO_BP_m3GO:004662 | positive re  | 1/539 | 15/23843 | 0.290423 | 0.609662 | 0.575258 | Prkcz   |
| GO_BP_m3GO:004871 | negative re  | 1/539 | 15/23843 | 0.290423 | 0.609662 | 0.575258 | Hes1    |
| GO_BP_m3GO:005104 | positive re  | 1/539 | 15/23843 | 0.290423 | 0.609662 | 0.575258 | Pacsin3 |
| GO_BP_m3GO:005113 | chaperone    | 1/539 | 15/23843 | 0.290423 | 0.609662 | 0.575258 | Mkks    |
| GO_BP_m3GO:005138 | regulation   | 1/539 | 15/23843 | 0.290423 | 0.609662 | 0.575258 | Ptprf   |
| GO_BP_m3GO:005154 | keratinocyt  | 1/539 | 15/23843 | 0.290423 | 0.609662 | 0.575258 | Ltb4r2  |
| GO_BP_m3GO:005157 | positive re  | 1/539 | 15/23843 | 0.290423 | 0.609662 | 0.575258 | Ctr9    |
| GO_BP_m3GO:005506 | phosphate    | 1/539 | 15/23843 | 0.290423 | 0.609662 | 0.575258 | Tfap2b  |
| GO_BP_m3GO:006005 | angiogene    | 1/539 | 15/23843 | 0.290423 | 0.609662 | 0.575258 | Foxc2   |
| GO_BP_m3GO:006025 | positive re  | 1/539 | 15/23843 | 0.290423 | 0.609662 | 0.575258 | Prkch   |
| GO_BP_m3GO:006100 | negative re  | 1/539 | 15/23843 | 0.290423 | 0.609662 | 0.575258 | Nlgn1   |
| GO_BP_m3GO:006102 | eyelid dev   | 1/539 | 15/23843 | 0.290423 | 0.609662 | 0.575258 | Twist1  |
| GO_BP_m3GO:007023 | positive re  | 1/539 | 15/23843 | 0.290423 | 0.609662 | 0.575258 | Ccl5    |
| GO_BP_m3GO:007102 | RNA survei   | 1/539 | 15/23843 | 0.290423 | 0.609662 | 0.575258 | Exosc6  |
| GO_BP_m3GO:007163 | positive re  | 1/539 | 15/23843 | 0.290423 | 0.609662 | 0.575258 | Cd46    |
| GO_BP_m3GO:007207 | kidney me    | 1/539 | 15/23843 | 0.290423 | 0.609662 | 0.575258 | Tcf21   |
| GO_BP_m3GO:007210 | glomerular   | 1/539 | 15/23843 | 0.290423 | 0.609662 | 0.575258 | Foxc2   |
| GO_BP_m3GO:007218 | ureter dev   | 1/539 | 15/23843 | 0.290423 | 0.609662 | 0.575258 | Foxf1   |
| GO_BP_m3GO:007233 | modified a   | 1/539 | 15/23843 | 0.290423 | 0.609662 | 0.575258 | Slc19a1 |
| GO_BP_m3GO:007249 | embryonic    | 1/539 | 15/23843 | 0.290423 | 0.609662 | 0.575258 | Ihh     |
| GO_BP_m3GO:007250 | divalent in  | 1/539 | 15/23843 | 0.290423 | 0.609662 | 0.575258 | Tfap2b  |
| GO_BP_m3GO:007250 | trivalent in | 1/539 | 15/23843 | 0.290423 | 0.609662 | 0.575258 | Tfap2b  |
| GO_BP_m3GO:007267 | neutrophil   | 1/539 | 15/23843 | 0.290423 | 0.609662 | 0.575258 | Prtn3   |
| GO_BP_m3GO:009008 | regulation   | 1/539 | 15/23843 | 0.290423 | 0.609662 | 0.575258 | Bag5    |
| GO_BP_m3GO:009013 | epithelial c | 1/539 | 15/23843 | 0.290423 | 0.609662 | 0.575258 | Ihh     |
| GO_BP_m3GO:009710 | postsynapt   | 1/539 | 15/23843 | 0.290423 | 0.609662 | 0.575258 | Nlgn1   |
| GO_BP_m3GO:009728 | hepatocyte   | 1/539 | 15/23843 | 0.290423 | 0.609662 | 0.575258 | Bcl2l1  |
| GO_BP_m3GO:009908 | postsynapt   | 1/539 | 15/23843 | 0.290423 | 0.609662 | 0.575258 | Nlgn1   |
| GO_BP_m3GO:190045 | regulation   | 1/539 | 15/23843 | 0.290423 | 0.609662 | 0.575258 | Bcl2l1  |

|                                      |           |          |          |          |             |
|--------------------------------------|-----------|----------|----------|----------|-------------|
| GO_BP_m3GO:190131regulation 1/539    | 15/23843  | 0.290423 | 0.609662 | 0.575258 | Tacr1       |
| GO_BP_m3GO:200047regulation 1/539    | 15/23843  | 0.290423 | 0.609662 | 0.575258 | Prkar1b     |
| GO_BP_m3GO:200081negative re1/539    | 15/23843  | 0.290423 | 0.609662 | 0.575258 | Bcl2l1      |
| GO_BP_m3GO:200105regulation 1/539    | 15/23843  | 0.290423 | 0.609662 | 0.575258 | Gdf5        |
| GO_BP_m3GO:00066Cprotein tarç9/539   | 317/23843 | 0.290758 | 0.610067 | 0.57564  | Ablim3/He   |
| GO_BP_m3GO:00512Çprotein het5/539    | 159/23843 | 0.291311 | 0.610629 | 0.576171 | Chrna4/Ch   |
| GO_BP_m3GO:19021Cpositive reç5/539   | 159/23843 | 0.291311 | 0.610629 | 0.576171 | Ccl5/Cd46/  |
| GO_BP_m3GO:00487Çappendageç6/539     | 199/23843 | 0.295463 | 0.614802 | 0.580109 | Gdf5/Ihh/P  |
| GO_BP_m3GO:006017limb develç6/539    | 199/23843 | 0.295463 | 0.614802 | 0.580109 | Gdf5/Ihh/P  |
| GO_BP_m3GO:003571CD4-positi3/539     | 84/23843  | 0.295603 | 0.614802 | 0.580109 | Nkx2-3/Prf  |
| GO_BP_m3GO:004227ribosomal l3/539    | 84/23843  | 0.295603 | 0.614802 | 0.580109 | Rpl6l/Nip7, |
| GO_BP_m3GO:00482Eregulation 3/539    | 84/23843  | 0.295603 | 0.614802 | 0.580109 | Atxn2/Lrrtr |
| GO_BP_m3GO:00720Çregulation 3/539    | 84/23843  | 0.295603 | 0.614802 | 0.580109 | Lrrk2/Nf2Ç  |
| GO_BP_m3GO:190352positive reç3/539   | 84/23843  | 0.295603 | 0.614802 | 0.580109 | Avp/Tacr1/  |
| GO_BP_m3GO:19035Epositive reç3/539   | 84/23843  | 0.295603 | 0.614802 | 0.580109 | C1qtnf4/Lr  |
| GO_BP_m3GO:00066Cprotein imç5/539    | 160/23843 | 0.295696 | 0.614802 | 0.580109 | Lrrk2/Nxt1, |
| GO_BP_m3GO:00063Çtranscriptic2/539   | 48/23843  | 0.295878 | 0.614802 | 0.580109 | Dmtf1/Ippç  |
| GO_BP_m3GO:000701microtubul2/539     | 48/23843  | 0.295878 | 0.614802 | 0.580109 | Ckap2/Sgk   |
| GO_BP_m3GO:00190Çreproductiv2/539    | 48/23843  | 0.295878 | 0.614802 | 0.580109 | Avp/Oxt     |
| GO_BP_m3GO:00219Eolfactory lc2/539   | 48/23843  | 0.295878 | 0.614802 | 0.580109 | Atf5/Lrrk2  |
| GO_BP_m3GO:00424Çinner ear a2/539    | 48/23843  | 0.295878 | 0.614802 | 0.580109 | Hes1/Whrr   |
| GO_BP_m3GO:00433Cregulation 2/539    | 48/23843  | 0.295878 | 0.614802 | 0.580109 | Abr/Foxf1   |
| GO_BP_m3GO:00439Ecellular cor2/539   | 48/23843  | 0.295878 | 0.614802 | 0.580109 | Prtn3/Whrr  |
| GO_BP_m3GO:009951vesicle cytc2/539   | 48/23843  | 0.295878 | 0.614802 | 0.580109 | Ap3s1/Prkc  |
| GO_BP_m3GO:20004Cregulation 2/539    | 48/23843  | 0.295878 | 0.614802 | 0.580109 | Aire/Ccl5   |
| GO_BP_m3GO:00725Cdivalent inc13/539  | 482/23843 | 0.297353 | 0.617567 | 0.582718 | Avp/Calb2,  |
| GO_BP_m3GO:190332positive reç4/539   | 122/23843 | 0.297944 | 0.618496 | 0.583594 | Ctr9/Fanci/ |
| GO_BP_m3GO:00027Cregulation 6/539    | 200/23843 | 0.299385 | 0.619147 | 0.584208 | Abr/Dnase   |
| GO_BP_m3GO:004211B cell activç11/539 | 401/23843 | 0.299483 | 0.619147 | 0.584208 | Chrna4/Exc  |
| GO_BP_m3GO:00023Çcytokine pr3/539    | 85/23843  | 0.301789 | 0.619147 | 0.584208 | Hk1/Prkcz/  |
| GO_BP_m3GO:004247odontogen3/539      | 85/23843  | 0.301789 | 0.619147 | 0.584208 | Bmp2/Nf2/   |
| GO_BP_m3GO:004547response tr3/539    | 85/23843  | 0.301789 | 0.619147 | 0.584208 | Hpgd/Mir3   |
| GO_BP_m3GO:200102positive reç3/539   | 85/23843  | 0.301789 | 0.619147 | 0.584208 | Ankle1/Eid  |
| GO_BP_m3GO:00713Ecellular resç6/539  | 201/23843 | 0.303317 | 0.619147 | 0.584208 | Ghrhr/Kdm   |
| GO_BP_m3GO:00022C somatic rec2/539   | 49/23843  | 0.304262 | 0.619147 | 0.584208 | Exosc6/Mir  |
| GO_BP_m3GO:00022C somatic div2/539   | 49/23843  | 0.304262 | 0.619147 | 0.584208 | Exosc6/Mir  |
| GO_BP_m3GO:000602aminoglycç2/539     | 49/23843  | 0.304262 | 0.619147 | 0.584208 | B3gnt6/Nd   |
| GO_BP_m3GO:001587dopamine 2/539      | 49/23843  | 0.304262 | 0.619147 | 0.584208 | Chrna4/Syt  |
| GO_BP_m3GO:003152ruffle organ2/539   | 49/23843  | 0.304262 | 0.619147 | 0.584208 | Nlgn1/Carr  |
| GO_BP_m3GO:00323Eresponse tr2/539    | 49/23843  | 0.304262 | 0.619147 | 0.584208 | Areg/Myoc   |
| GO_BP_m3GO:00329Çcollagen bi2/539    | 49/23843  | 0.304262 | 0.619147 | 0.584208 | Ihh/Ucn     |
| GO_BP_m3GO:00330Cregulation 2/539    | 49/23843  | 0.304262 | 0.619147 | 0.584208 | Foxf1/Ptprc |
| GO_BP_m3GO:00451Çisotype swi2/539    | 49/23843  | 0.304262 | 0.619147 | 0.584208 | Exosc6/Mir  |
| GO_BP_m3GO:19032Cnegative re2/539    | 49/23843  | 0.304262 | 0.619147 | 0.584208 | Bag5/Lrrk2  |
| GO_BP_m3GO:003087mammary 5/539       | 162/23843 | 0.304499 | 0.619147 | 0.584208 | Areg/Foxf1  |
| GO_BP_m3GO:000171endodermç1/539      | 16/23843  | 0.306474 | 0.619147 | 0.584208 | Ctr9        |
| GO_BP_m3GO:000322ventricular 1/539   | 16/23843  | 0.306474 | 0.619147 | 0.584208 | Tgfb1       |
| GO_BP_m3GO:00063C apoptotic ç1/539   | 16/23843  | 0.306474 | 0.619147 | 0.584208 | Dnase1l3    |

|                                                           |           |          |          |          |              |
|-----------------------------------------------------------|-----------|----------|----------|----------|--------------|
| GO_BP_m3GO:000647N-terminal1/539                          | 16/23843  | 0.306474 | 0.619147 | 0.584208 | Naa25        |
| GO_BP_m3GO:000666NLS-bearing1/539                         | 16/23843  | 0.306474 | 0.619147 | 0.584208 | Tnpo2        |
| GO_BP_m3GO:000682manganese1/539                           | 16/23843  | 0.306474 | 0.619147 | 0.584208 | Trpc1        |
| GO_BP_m3GO:000721G-protein1/539                           | 16/23843  | 0.306474 | 0.619147 | 0.584208 | Grm4         |
| GO_BP_m3GO:001052regulation1/539                          | 16/23843  | 0.306474 | 0.619147 | 0.584208 | Piwil4       |
| GO_BP_m3GO:001052negative regulation1/539                 | 16/23843  | 0.306474 | 0.619147 | 0.584208 | Piwil4       |
| GO_BP_m3GO:001056regulation1/539                          | 16/23843  | 0.306474 | 0.619147 | 0.584208 | Bmp2         |
| GO_BP_m3GO:001566gas transport1/539                       | 16/23843  | 0.306474 | 0.619147 | 0.584208 | Aqp5         |
| GO_BP_m3GO:002175striatum development1/539                | 16/23843  | 0.306474 | 0.619147 | 0.584208 | Mkks         |
| GO_BP_m3GO:002197telencephalon development1/539           | 16/23843  | 0.306474 | 0.619147 | 0.584208 | Bmp2         |
| GO_BP_m3GO:003095establishment of planar polarity1/539    | 16/23843  | 0.306474 | 0.619147 | 0.584208 | Rhob         |
| GO_BP_m3GO:003230positive regulation of cell growth1/539  | 16/23843  | 0.306474 | 0.619147 | 0.584208 | Oxt          |
| GO_BP_m3GO:003231prostaglandin production1/539            | 16/23843  | 0.306474 | 0.619147 | 0.584208 | Oxt          |
| GO_BP_m3GO:003257response to hypoxia1/539                 | 16/23843  | 0.306474 | 0.619147 | 0.584208 | Oxt          |
| GO_BP_m3GO:004392positive regulation of cell growth1/539  | 16/23843  | 0.306474 | 0.619147 | 0.584208 | Ctdp1        |
| GO_BP_m3GO:004406regulation of cell growth1/539           | 16/23843  | 0.306474 | 0.619147 | 0.584208 | Nlgn1        |
| GO_BP_m3GO:004406modulation of cell growth1/539           | 16/23843  | 0.306474 | 0.619147 | 0.584208 | Bcl2l1       |
| GO_BP_m3GO:004807regulation of cell growth1/539           | 16/23843  | 0.306474 | 0.619147 | 0.584208 | Ihh          |
| GO_BP_m3GO:006057ventral spiracle development1/539        | 16/23843  | 0.306474 | 0.619147 | 0.584208 | Nkx6-1       |
| GO_BP_m3GO:006055cell fate commitment1/539                | 16/23843  | 0.306474 | 0.619147 | 0.584208 | Nkx6-1       |
| GO_BP_m3GO:007137cellular response to hypoxia1/539        | 16/23843  | 0.306474 | 0.619147 | 0.584208 | P2ry6        |
| GO_BP_m3GO:007149cellular response to hypoxia1/539        | 16/23843  | 0.306474 | 0.619147 | 0.584208 | Klf2         |
| GO_BP_m3GO:007201glomerular development1/539              | 16/23843  | 0.306474 | 0.619147 | 0.584208 | Foxc2        |
| GO_BP_m3GO:009715mesenchyme development1/539              | 16/23843  | 0.306474 | 0.619147 | 0.584208 | Gdf5         |
| GO_BP_m3GO:009732plasma membrane development1/539         | 16/23843  | 0.306474 | 0.619147 | 0.584208 | Pacsin3      |
| GO_BP_m3GO:009753sialylation1/539                         | 16/23843  | 0.306474 | 0.619147 | 0.584208 | St6galnac5   |
| GO_BP_m3GO:009917presynaptic transmission1/539            | 16/23843  | 0.306474 | 0.619147 | 0.584208 | Nlgn1        |
| GO_BP_m3GO:190015regulation of cell growth1/539           | 16/23843  | 0.306474 | 0.619147 | 0.584208 | Nanos1       |
| GO_BP_m3GO:190015positive regulation of cell growth1/539  | 16/23843  | 0.306474 | 0.619147 | 0.584208 | Nanos1       |
| GO_BP_m3GO:190185positive regulation of cell growth1/539  | 16/23843  | 0.306474 | 0.619147 | 0.584208 | Carmil2      |
| GO_BP_m3GO:190271regulation of cell growth1/539           | 16/23843  | 0.306474 | 0.619147 | 0.584208 | Carmil2      |
| GO_BP_m3GO:190353protein localization1/539                | 16/23843  | 0.306474 | 0.619147 | 0.584208 | Grin2c       |
| GO_BP_m3GO:190466regulation of cell growth1/539           | 16/23843  | 0.306474 | 0.619147 | 0.584208 | Mad2l1       |
| GO_BP_m3GO:200029regulation of cell growth1/539           | 16/23843  | 0.306474 | 0.619147 | 0.584208 | Myod1        |
| GO_BP_m3GO:200117negative regulation of cell growth1/539  | 16/23843  | 0.306474 | 0.619147 | 0.584208 | Ier3         |
| GO_BP_m3GO:200124positive regulation of cell growth1/539  | 16/23843  | 0.306474 | 0.619147 | 0.584208 | Wwox         |
| GO_BP_m3GO:009865anion transport6/539                     | 202/23843 | 0.307257 | 0.620148 | 0.585153 | Clcn1/Hk1/le |
| GO_BP_m3GO:190195regulation of cell growth8/539           | 282/23843 | 0.307439 | 0.620148 | 0.585153 | Atf5/Fanci/  |
| GO_BP_m3GO:000181positive regulation of cell growth11/539 | 404/23843 | 0.30775  | 0.620148 | 0.585153 | C1qtnf4/Cc   |
| GO_BP_m3GO:000616nucleoside transport3/539                | 86/23843  | 0.307981 | 0.620148 | 0.585153 | Ak7/Hk1/le   |
| GO_BP_m3GO:003260chemokine transport3/539                 | 86/23843  | 0.307981 | 0.620148 | 0.585153 | Aire/Ccl5/T  |
| GO_BP_m3GO:004315negative regulation of cell growth3/539  | 86/23843  | 0.307981 | 0.620148 | 0.585153 | Avp/Cryaa/   |
| GO_BP_m3GO:004483cell cycle G4/539                        | 124/23843 | 0.308125 | 0.620148 | 0.585153 | Atf5/Fanci/  |
| GO_BP_m3GO:190265secondary cell cycle4/539                | 124/23843 | 0.308125 | 0.620148 | 0.585153 | Dhcr24/Fdb   |
| GO_BP_m3GO:000166behavioral response2/539                 | 50/23843  | 0.312627 | 0.626859 | 0.591486 | Grik2/Ucn    |
| GO_BP_m3GO:001051regulation of cell growth2/539           | 50/23843  | 0.312627 | 0.626859 | 0.591486 | Ccl5/Prkcz   |
| GO_BP_m3GO:003235regulation of cell growth2/539           | 50/23843  | 0.312627 | 0.626859 | 0.591486 | Bmp2/Stc2    |
| GO_BP_m3GO:003362cell adhesion2/539                       | 50/23843  | 0.312627 | 0.626859 | 0.591486 | Ccl5/Foxc2   |

|                   |              |        |           |          |          |          |             |
|-------------------|--------------|--------|-----------|----------|----------|----------|-------------|
| GO_BP_m3GO:003530 | positive re  | 2/539  | 50/23843  | 0.312627 | 0.626859 | 0.591486 | Bmp2/Dusp   |
| GO_BP_m3GO:004361 | regulation   | 2/539  | 50/23843  | 0.312627 | 0.626859 | 0.591486 | Hsf4/Klf2   |
| GO_BP_m3GO:004394 | regulation   | 2/539  | 50/23843  | 0.312627 | 0.626859 | 0.591486 | Gip/Ucn     |
| GO_BP_m3GO:190040 | negative re  | 2/539  | 50/23843  | 0.312627 | 0.626859 | 0.591486 | Bag5/Lrrk2  |
| GO_BP_m3GO:000265 | negative re  | 5/539  | 164/23843 | 0.313341 | 0.627412 | 0.592007 | Abr/Btn1a1  |
| GO_BP_m3GO:003505 | cardiocyte   | 5/539  | 164/23843 | 0.313341 | 0.627412 | 0.592007 | Bmp2/Ctdp   |
| GO_BP_m3GO:005117 | import int   | 5/539  | 164/23843 | 0.313341 | 0.627412 | 0.592007 | Lrrk2/Nxt1  |
| GO_BP_m3GO:001490 | smooth m     | 3/539  | 87/23843  | 0.314178 | 0.628503 | 0.593036 | Ccl5/P2ry6  |
| GO_BP_m3GO:003112 | RNA 3'-en    | 3/539  | 87/23843  | 0.314178 | 0.628503 | 0.593036 | Ctr9/Exosc  |
| GO_BP_m3GO:003214 | activation   | 3/539  | 244/23843 | 0.315167 | 0.62934  | 0.593826 | Bmp2/Grm    |
| GO_BP_m3GO:001097 | negative re  | 5/539  | 165/23843 | 0.317775 | 0.62934  | 0.593826 | Bag5/Dleu   |
| GO_BP_m3GO:004851 | spermatid    | 5/539  | 165/23843 | 0.317775 | 0.62934  | 0.593826 | Catsper4/C  |
| GO_BP_m3GO:005086 | positive re  | 12/539 | 449/23843 | 0.318322 | 0.62934  | 0.593826 | Ccl5/Cd46/  |
| GO_BP_m3GO:003017 | positive re  | 4/539  | 126/23843 | 0.31834  | 0.62934  | 0.593826 | Bmp2/Dixc   |
| GO_BP_m3GO:002176 | limbic syst  | 3/539  | 88/23843  | 0.320378 | 0.62934  | 0.593826 | Atat1/Mkks  |
| GO_BP_m3GO:003296 | collagen m   | 3/539  | 88/23843  | 0.320378 | 0.62934  | 0.593826 | Ihh/Prtn3/L |
| GO_BP_m3GO:004693 | nucleotide   | 3/539  | 88/23843  | 0.320378 | 0.62934  | 0.593826 | Ak7/Hk1/le  |
| GO_BP_m3GO:005076 | regulation   | 3/539  | 88/23843  | 0.320378 | 0.62934  | 0.593826 | Abr/Hck/Pr  |
| GO_BP_m3GO:007267 | lymphocyte   | 3/539  | 88/23843  | 0.320378 | 0.62934  | 0.593826 | Aire/Ccl5/S |
| GO_BP_m3GO:000197 | blood vess   | 2/539  | 51/23843  | 0.32097  | 0.62934  | 0.593826 | Abr/Foxc2   |
| GO_BP_m3GO:000220 | behavioral   | 2/539  | 51/23843  | 0.32097  | 0.62934  | 0.593826 | Grik2/Ucn   |
| GO_BP_m3GO:003007 | regulation   | 2/539  | 51/23843  | 0.32097  | 0.62934  | 0.593826 | Mad211/Utk  |
| GO_BP_m3GO:003090 | midbrain d   | 2/539  | 51/23843  | 0.32097  | 0.62934  | 0.593826 | Hes1/Otx1   |
| GO_BP_m3GO:003361 | membrane     | 2/539  | 51/23843  | 0.32097  | 0.62934  | 0.593826 | Pacsin3/Prt |
| GO_BP_m3GO:005085 | regulation   | 2/539  | 51/23843  | 0.32097  | 0.62934  | 0.593826 | Prkch/Usp1  |
| GO_BP_m3GO:005129 | protein het  | 2/539  | 51/23843  | 0.32097  | 0.62934  | 0.593826 | Nlgn1/Rrm   |
| GO_BP_m3GO:000196 | suckling be  | 1/539  | 17/23843  | 0.322163 | 0.62934  | 0.593826 | Helt        |
| GO_BP_m3GO:000199 | regulation   | 1/539  | 17/23843  | 0.322163 | 0.62934  | 0.593826 | Ndst2       |
| GO_BP_m3GO:000319 | epithelial t | 1/539  | 17/23843  | 0.322163 | 0.62934  | 0.593826 | Tgfb1       |
| GO_BP_m3GO:000341 | growth pla   | 1/539  | 17/23843  | 0.322163 | 0.62934  | 0.593826 | Col27a1     |
| GO_BP_m3GO:000670 | C21-steroi   | 1/539  | 17/23843  | 0.322163 | 0.62934  | 0.593826 | Bmp2        |
| GO_BP_m3GO:000821 | estrogen r   | 1/539  | 17/23843  | 0.322163 | 0.62934  | 0.593826 | Ugt1a7c     |
| GO_BP_m3GO:000986 | post-embr    | 1/539  | 17/23843  | 0.322163 | 0.62934  | 0.593826 | Nkx2-3      |
| GO_BP_m3GO:001076 | negative re  | 1/539  | 17/23843  | 0.322163 | 0.62934  | 0.593826 | Stoml1      |
| GO_BP_m3GO:003164 | positive re  | 1/539  | 17/23843  | 0.322163 | 0.62934  | 0.593826 | Sox10       |
| GO_BP_m3GO:003360 | negative re  | 1/539  | 17/23843  | 0.322163 | 0.62934  | 0.593826 | Syt4        |
| GO_BP_m3GO:003531 | wound hea    | 1/539  | 17/23843  | 0.322163 | 0.62934  | 0.593826 | Plet1       |
| GO_BP_m3GO:004219 | neurotrans   | 1/539  | 17/23843  | 0.322163 | 0.62934  | 0.593826 | Gcsh        |
| GO_BP_m3GO:004244 | hormone c    | 1/539  | 17/23843  | 0.322163 | 0.62934  | 0.593826 | Ugt1a7c     |
| GO_BP_m3GO:004248 | regulation   | 1/539  | 17/23843  | 0.322163 | 0.62934  | 0.593826 | Bmp2        |
| GO_BP_m3GO:004432 | response t   | 1/539  | 17/23843  | 0.322163 | 0.62934  | 0.593826 | Mkks        |
| GO_BP_m3GO:004506 | T-helper 2   | 1/539  | 17/23843  | 0.322163 | 0.62934  | 0.593826 | Prkcz       |
| GO_BP_m3GO:004618 | aldehyde b   | 1/539  | 17/23843  | 0.322163 | 0.62934  | 0.593826 | Bmp2        |
| GO_BP_m3GO:004836 | lateral mes  | 1/539  | 17/23843  | 0.322163 | 0.62934  | 0.593826 | Foxf1       |
| GO_BP_m3GO:004849 | anterograd   | 1/539  | 17/23843  | 0.322163 | 0.62934  | 0.593826 | Ap3s1       |
| GO_BP_m3GO:004885 | forebrain n  | 1/539  | 17/23843  | 0.322163 | 0.62934  | 0.593826 | Otx1        |
| GO_BP_m3GO:006008 | membrane     | 1/539  | 17/23843  | 0.322163 | 0.62934  | 0.593826 | Prkcz       |
| GO_BP_m3GO:006054 | negative re  | 1/539  | 17/23843  | 0.322163 | 0.62934  | 0.593826 | Ucn         |

|                                      |           |          |          |          |              |
|--------------------------------------|-----------|----------|----------|----------|--------------|
| GO_BP_m3GO:006085regulation 1/539    | 17/23843  | 0.322163 | 0.62934  | 0.593826 | Nkx6-1       |
| GO_BP_m3GO:006097cell migrati1/539   | 17/23843  | 0.322163 | 0.62934  | 0.593826 | Twist1       |
| GO_BP_m3GO:007223metaneph1/539       | 17/23843  | 0.322163 | 0.62934  | 0.593826 | Hes1         |
| GO_BP_m3GO:008018histone H3 1/539    | 17/23843  | 0.322163 | 0.62934  | 0.593826 | Ctr9         |
| GO_BP_m3GO:009023regulation 1/539    | 17/23843  | 0.322163 | 0.62934  | 0.593826 | Mad211       |
| GO_BP_m3GO:009951synaptic ve1/539    | 17/23843  | 0.322163 | 0.62934  | 0.593826 | Ap3s1        |
| GO_BP_m3GO:009951synaptic ve1/539    | 17/23843  | 0.322163 | 0.62934  | 0.593826 | Ap3s1        |
| GO_BP_m3GO:190217negative re1/539    | 17/23843  | 0.322163 | 0.62934  | 0.593826 | Bag5         |
| GO_BP_m3GO:190531semi-lunar 1/539    | 17/23843  | 0.322163 | 0.62934  | 0.593826 | Twist1       |
| GO_BP_m3GO:200077negative re1/539    | 17/23843  | 0.322163 | 0.62934  | 0.593826 | Twist1       |
| GO_BP_m3GO:200078positive re1/539    | 17/23843  | 0.322163 | 0.62934  | 0.593826 | Kdm4d        |
| GO_BP_m3GO:200081regulation 1/539    | 17/23843  | 0.322163 | 0.62934  | 0.593826 | Prkch        |
| GO_BP_m3GO:004352negative re5/539    | 166/23843 | 0.322216 | 0.62934  | 0.593826 | Bcl2l1/Crlf1 |
| GO_BP_m3GO:000269positive re6/539    | 206/23843 | 0.323105 | 0.63079  | 0.595194 | Cd46/Exos    |
| GO_BP_m3GO:004566negative re7/539    | 247/23843 | 0.326035 | 0.634806 | 0.598984 | Bag5/Dixd    |
| GO_BP_m3GO:001406regulation 3/539    | 89/23843  | 0.326579 | 0.634806 | 0.598984 | Ccl5/Prr5/T  |
| GO_BP_m3GO:005502regulation 3/539    | 89/23843  | 0.326579 | 0.634806 | 0.598984 | Bmp2/Ctd     |
| GO_BP_m3GO:007123cellular res5/539   | 167/23843 | 0.326665 | 0.634806 | 0.598984 | Bcl2l1/Mir1  |
| GO_BP_m3GO:003033positive re13/539   | 494/23843 | 0.327682 | 0.634806 | 0.598984 | Bmp2/Ccl5    |
| GO_BP_m3GO:001612sterol biosy2/539   | 52/23843  | 0.329288 | 0.634806 | 0.598984 | Dhcr24/Tr    |
| GO_BP_m3GO:002158cerebellum2/539     | 52/23843  | 0.329288 | 0.634806 | 0.598984 | Atxn2/Whr    |
| GO_BP_m3GO:004559negative re2/539    | 52/23843  | 0.329288 | 0.634806 | 0.598984 | Jdp2/Trib2   |
| GO_BP_m3GO:005073negative re2/539    | 52/23843  | 0.329288 | 0.634806 | 0.598984 | Nf2/Prkcz    |
| GO_BP_m3GO:005087multicellula2/539   | 52/23843  | 0.329288 | 0.634806 | 0.598984 | Tnni2/Tnnt   |
| GO_BP_m3GO:005088musculoske2/539     | 52/23843  | 0.329288 | 0.634806 | 0.598984 | Tnni2/Tnnt   |
| GO_BP_m3GO:007009chemokine 2/539     | 52/23843  | 0.329288 | 0.634806 | 0.598984 | Ccl5/Tff2    |
| GO_BP_m3GO:190209regulation 2/539    | 52/23843  | 0.329288 | 0.634806 | 0.598984 | Mad211/Ul    |
| GO_BP_m3GO:190520regulation 2/539    | 52/23843  | 0.329288 | 0.634806 | 0.598984 | Bmp2/Ctd     |
| GO_BP_m3GO:006056epithelial ti10/539 | 371/23843 | 0.330823 | 0.634806 | 0.598984 | Areg/Bmp2    |
| GO_BP_m3GO:004225ribosome t8/539     | 289/23843 | 0.330864 | 0.634806 | 0.598984 | Dis3/Exosc   |
| GO_BP_m3GO:000244myeloid let3/539    | 90/23843  | 0.332779 | 0.634806 | 0.598984 | Abr/Dnase    |
| GO_BP_m3GO:000630DNA modifi3/539     | 90/23843  | 0.332779 | 0.634806 | 0.598984 | Exosc6/Mo    |
| GO_BP_m3GO:004506regulation 3/539    | 90/23843  | 0.332779 | 0.634806 | 0.598984 | Ccl5/Isg20,  |
| GO_BP_m3GO:005079regulation 3/539    | 90/23843  | 0.332779 | 0.634806 | 0.598984 | Ghrhr/Nlgr   |
| GO_BP_m3GO:000183epithelial tr4/539  | 129/23843 | 0.333371 | 0.634806 | 0.598984 | Axin2/Bmp    |
| GO_BP_m3GO:004688regulation 8/539    | 290/23843 | 0.334236 | 0.634806 | 0.598984 | Ccl5/Ghrhr   |
| GO_BP_m3GO:000257myeloid let6/539    | 209/23843 | 0.335067 | 0.634806 | 0.598984 | Ccl5/L3mb    |
| GO_BP_m3GO:003286response tr6/539    | 209/23843 | 0.335067 | 0.634806 | 0.598984 | Foxc2/Ghr    |
| GO_BP_m3GO:000721Notch sign 5/539    | 169/23843 | 0.33558  | 0.634806 | 0.598984 | Bend6/Bm     |
| GO_BP_m3GO:001077positive re5/539    | 169/23843 | 0.33558  | 0.634806 | 0.598984 | Caprin1/Cu   |
| GO_BP_m3GO:000683neurotrans 7/539    | 250/23843 | 0.336962 | 0.634806 | 0.598984 | Bcl2l1/Gpr   |
| GO_BP_m3GO:000171mesoderm 1/539      | 18/23843  | 0.337497 | 0.634806 | 0.598984 | Foxc2        |
| GO_BP_m3GO:000612mitochond 1/539     | 18/23843  | 0.337497 | 0.634806 | 0.598984 | Dld          |
| GO_BP_m3GO:000668glycosphin1/539     | 18/23843  | 0.337497 | 0.634806 | 0.598984 | St6galnac5   |
| GO_BP_m3GO:000719activation c1/539   | 18/23843  | 0.337497 | 0.634806 | 0.598984 | Ghrhr        |
| GO_BP_m3GO:000739ectoderm c1/539     | 18/23843  | 0.337497 | 0.634806 | 0.598984 | Nf2          |
| GO_BP_m3GO:000995dorsal/vent1/539    | 18/23843  | 0.337497 | 0.634806 | 0.598984 | Axin2        |
| GO_BP_m3GO:001075positive re1/539    | 18/23843  | 0.337497 | 0.634806 | 0.598984 | Ccl5         |

|                                      |          |          |          |          |            |
|--------------------------------------|----------|----------|----------|----------|------------|
| GO_BP_m3GO:001081T cell chem 1/539   | 18/23843 | 0.337497 | 0.634806 | 0.598984 | Ccl5       |
| GO_BP_m3GO:001406regulation 1/539    | 18/23843 | 0.337497 | 0.634806 | 0.598984 | Oxt        |
| GO_BP_m3GO:002151ventral spir 1/539  | 18/23843 | 0.337497 | 0.634806 | 0.598984 | Nkx6-1     |
| GO_BP_m3GO:002154dentate gy 1/539    | 18/23843 | 0.337497 | 0.634806 | 0.598984 | Atat1      |
| GO_BP_m3GO:002178preganglio 1/539    | 18/23843 | 0.337497 | 0.634806 | 0.598984 | Hes1       |
| GO_BP_m3GO:002201central ner 1/539   | 18/23843 | 0.337497 | 0.634806 | 0.598984 | Sox10      |
| GO_BP_m3GO:003199regulation 1/539    | 18/23843 | 0.337497 | 0.634806 | 0.598984 | Twist1     |
| GO_BP_m3GO:003219transpositic 1/539  | 18/23843 | 0.337497 | 0.634806 | 0.598984 | Piwil4     |
| GO_BP_m3GO:003227gonadotro  1/539    | 18/23843 | 0.337497 | 0.634806 | 0.598984 | Ucn2       |
| GO_BP_m3GO:003229axon enshc 1/539    | 18/23843 | 0.337497 | 0.634806 | 0.598984 | Sox10      |
| GO_BP_m3GO:003265regulation 1/539    | 18/23843 | 0.337497 | 0.634806 | 0.598984 | Prkcz      |
| GO_BP_m3GO:003267regulation 1/539    | 18/23843 | 0.337497 | 0.634806 | 0.598984 | Prkcz      |
| GO_BP_m3GO:003269negative re 1/539   | 18/23843 | 0.337497 | 0.634806 | 0.598984 | Trib2      |
| GO_BP_m3GO:003506negative re 1/539   | 18/23843 | 0.337497 | 0.634806 | 0.598984 | Twist1     |
| GO_BP_m3GO:003603CD8-positi 1/539    | 18/23843 | 0.337497 | 0.634806 | 0.598984 | Satb1      |
| GO_BP_m3GO:004243melanin bic 1/539   | 18/23843 | 0.337497 | 0.634806 | 0.598984 | Trpc1      |
| GO_BP_m3GO:004393ossification 1/539  | 18/23843 | 0.337497 | 0.634806 | 0.598984 | Bmp2       |
| GO_BP_m3GO:004632positive re 1/539   | 18/23843 | 0.337497 | 0.634806 | 0.598984 | Twist1     |
| GO_BP_m3GO:004824norepinepl 1/539    | 18/23843 | 0.337497 | 0.634806 | 0.598984 | Oxt        |
| GO_BP_m3GO:004871negative re 1/539   | 18/23843 | 0.337497 | 0.634806 | 0.598984 | Atf5       |
| GO_BP_m3GO:005076negative re 1/539   | 18/23843 | 0.337497 | 0.634806 | 0.598984 | Prtn3      |
| GO_BP_m3GO:005091detection c 1/539   | 18/23843 | 0.337497 | 0.634806 | 0.598984 | Mkks       |
| GO_BP_m3GO:005119negative re 1/539   | 18/23843 | 0.337497 | 0.634806 | 0.598984 | Ier3       |
| GO_BP_m3GO:005196negative re 1/539   | 18/23843 | 0.337497 | 0.634806 | 0.598984 | Grik2      |
| GO_BP_m3GO:005506chloride ioi 1/539  | 18/23843 | 0.337497 | 0.634806 | 0.598984 | Slc12a7    |
| GO_BP_m3GO:006008auditory re 1/539   | 18/23843 | 0.337497 | 0.634806 | 0.598984 | Whrn       |
| GO_BP_m3GO:006033regulation 1/539    | 18/23843 | 0.337497 | 0.634806 | 0.598984 | Trim6      |
| GO_BP_m3GO:006039regulation 1/539    | 18/23843 | 0.337497 | 0.634806 | 0.598984 | Tgfbr1     |
| GO_BP_m3GO:006084venous blo 1/539    | 18/23843 | 0.337497 | 0.634806 | 0.598984 | Foxf1      |
| GO_BP_m3GO:007160monocyte r 1/539    | 18/23843 | 0.337497 | 0.634806 | 0.598984 | Twist1     |
| GO_BP_m3GO:007163regulation 1/539    | 18/23843 | 0.337497 | 0.634806 | 0.598984 | Twist1     |
| GO_BP_m3GO:007180regulation 1/539    | 18/23843 | 0.337497 | 0.634806 | 0.598984 | Hck        |
| GO_BP_m3GO:009002positive re 1/539   | 18/23843 | 0.337497 | 0.634806 | 0.598984 | Ccl5       |
| GO_BP_m3GO:009003regulation 1/539    | 18/23843 | 0.337497 | 0.634806 | 0.598984 | Bmp2       |
| GO_BP_m3GO:009881neurotrans 1/539    | 18/23843 | 0.337497 | 0.634806 | 0.598984 | Gpm6b      |
| GO_BP_m3GO:190102regulation 1/539    | 18/23843 | 0.337497 | 0.634806 | 0.598984 | Ier3       |
| GO_BP_m3GO:190162regulation 1/539    | 18/23843 | 0.337497 | 0.634806 | 0.598984 | Ccl5       |
| GO_BP_m3GO:190223negative re 1/539   | 18/23843 | 0.337497 | 0.634806 | 0.598984 | Lrrk2      |
| GO_BP_m3GO:200026regulation 1/539    | 18/23843 | 0.337497 | 0.634806 | 0.598984 | Ier3ip1    |
| GO_BP_m3GO:000175neural cres 2/539   | 53/23843 | 0.337578 | 0.634806 | 0.598984 | Sox10/Twis |
| GO_BP_m3GO:000304regulation 2/539    | 53/23843 | 0.337578 | 0.634806 | 0.598984 | Ndst2/Tacr |
| GO_BP_m3GO:000994anterior/pc 2/539   | 53/23843 | 0.337578 | 0.634806 | 0.598984 | Neurog1/T  |
| GO_BP_m3GO:003531hair cell dif 2/539 | 53/23843 | 0.337578 | 0.634806 | 0.598984 | Hes1/Whrr  |
| GO_BP_m3GO:004438protein loc 2/539   | 53/23843 | 0.337578 | 0.634806 | 0.598984 | Cep131/Fa  |
| GO_BP_m3GO:004806developme 2/539     | 53/23843 | 0.337578 | 0.634806 | 0.598984 | Ihh/Sox10  |
| GO_BP_m3GO:005193synaptic trc 2/539  | 53/23843 | 0.337578 | 0.634806 | 0.598984 | Nlgn1/Tacr |
| GO_BP_m3GO:005501ventricular 2/539   | 53/23843 | 0.337578 | 0.634806 | 0.598984 | Foxc2/Tgft |
| GO_BP_m3GO:006138trabecula n 2/539   | 53/23843 | 0.337578 | 0.634806 | 0.598984 | S1pr1/Tgft |

|                                 |        |           |          |          |          |              |
|---------------------------------|--------|-----------|----------|----------|----------|--------------|
| GO_BP_m3GO:009030 positive re   | 2/539  | 53/23843  | 0.337578 | 0.634806 | 0.598984 | Foxc2/Myo    |
| GO_BP_m3GO:190288 negative re   | 2/539  | 53/23843  | 0.337578 | 0.634806 | 0.598984 | Bag5/Lrrk2   |
| GO_BP_m3GO:001612 sterol meta   | 4/539  | 130/23843 | 0.338841 | 0.6366   | 0.600677 | Dhcr24/Fd    |
| GO_BP_m3GO:003105 positive re   | 3/539  | 91/23843  | 0.338977 | 0.6366   | 0.600677 | Ctr9/Jdp2/   |
| GO_BP_m3GO:004544 myoblast d    | 3/539  | 91/23843  | 0.338977 | 0.6366   | 0.600677 | Cdon/Myo     |
| GO_BP_m3GO:005088 regulation    | 5/539  | 170/23843 | 0.340046 | 0.638329 | 0.602308 | Avp/Foxc2,   |
| GO_BP_m3GO:001046 negative re   | 7/539  | 251/23843 | 0.340616 | 0.639119 | 0.603053 | 9230104L0    |
| GO_BP_m3GO:000244 leukocyte r   | 12/539 | 458/23843 | 0.342423 | 0.642231 | 0.60599  | Abr/Aire/C   |
| GO_BP_m3GO:190353 negative re   | 6/539  | 211/23843 | 0.34307  | 0.643162 | 0.606868 | Abr/Btn1a1   |
| GO_BP_m3GO:190156 fatty acid d  | 4/539  | 131/23843 | 0.343976 | 0.644132 | 0.607783 | Avp/Cyp2c    |
| GO_BP_m3GO:001605 Wnt signali   | 11/539 | 417/23843 | 0.344173 | 0.644132 | 0.607783 | Axin2/Bmp    |
| GO_BP_m3GO:004206 gliogenesis   | 8/539  | 293/23843 | 0.344383 | 0.644132 | 0.607783 | Areg/Atf5/   |
| GO_BP_m3GO:000736 gastrulation  | 5/539  | 171/23843 | 0.344516 | 0.644132 | 0.607783 | Ctr9/Dld/Fr  |
| GO_BP_m3GO:003515 regulation    | 5/539  | 171/23843 | 0.344516 | 0.644132 | 0.607783 | Avp/Foxc2,   |
| GO_BP_m3GO:007250 cellular div. | 12/539 | 459/23843 | 0.345124 | 0.644132 | 0.607783 | Avp/Calb2,   |
| GO_BP_m3GO:005181 modificatic   | 3/539  | 92/23843  | 0.345171 | 0.644132 | 0.607783 | Bcl2l1/Ccl5  |
| GO_BP_m3GO:000270 negative re   | 2/539  | 54/23843  | 0.345837 | 0.644132 | 0.607783 | Abr/Foxf1    |
| GO_BP_m3GO:000674 glutathione   | 2/539  | 54/23843  | 0.345837 | 0.644132 | 0.607783 | Gdap1l1/G    |
| GO_BP_m3GO:000758 respiratory   | 2/539  | 54/23843  | 0.345837 | 0.644132 | 0.607783 | Chrna4/Nlc   |
| GO_BP_m3GO:001082 positive re   | 2/539  | 54/23843  | 0.345837 | 0.644132 | 0.607783 | Gip/Prkc     |
| GO_BP_m3GO:002179 cerebral co   | 2/539  | 54/23843  | 0.345837 | 0.644132 | 0.607783 | Dixdc1/Md    |
| GO_BP_m3GO:004259 fear respor   | 2/539  | 54/23843  | 0.345837 | 0.644132 | 0.607783 | Grik2/Ucn    |
| GO_BP_m3GO:004406 regulation    | 2/539  | 54/23843  | 0.345837 | 0.644132 | 0.607783 | Ucn/Ucn2     |
| GO_BP_m3GO:006019 positive re   | 2/539  | 54/23843  | 0.345837 | 0.644132 | 0.607783 | Ccl5/Prkc    |
| GO_BP_m3GO:001820 peptidyl-ly   | 9/539  | 335/23843 | 0.346962 | 0.644497 | 0.608128 | Atat1/Ctr9,  |
| GO_BP_m3GO:003447 ncRNA pro     | 9/539  | 335/23843 | 0.346962 | 0.644497 | 0.608128 | Trmo/Dis3,   |
| GO_BP_m3GO:004886 stem cell d   | 6/539  | 212/23843 | 0.347079 | 0.644497 | 0.608128 | Epop/Foxc:   |
| GO_BP_m3GO:005149 positive re   | 6/539  | 212/23843 | 0.347079 | 0.644497 | 0.608128 | Hck/Nf2/R:   |
| GO_BP_m3GO:000663 fatty acid n  | 10/539 | 377/23843 | 0.348708 | 0.644497 | 0.608128 | Avp/Cyp2c    |
| GO_BP_m3GO:007188 leukocyte     | 4/539  | 132/23843 | 0.349112 | 0.644497 | 0.608128 | Ccl5/Mir10   |
| GO_BP_m3GO:019873 cell-cell sig | 11/539 | 419/23843 | 0.349848 | 0.644497 | 0.608128 | Axin2/Bmp    |
| GO_BP_m3GO:000700 mitochond     | 3/539  | 93/23843  | 0.35136  | 0.644497 | 0.608128 | Bcl2l1/Ier3, |
| GO_BP_m3GO:000211 store-oper    | 1/539  | 19/23843  | 0.352485 | 0.644497 | 0.608128 | Stc2         |
| GO_BP_m3GO:000231 mature B c    | 1/539  | 19/23843  | 0.352485 | 0.644497 | 0.608128 | Nkx2-3       |
| GO_BP_m3GO:000321 cardiac left  | 1/539  | 19/23843  | 0.352485 | 0.644497 | 0.608128 | Foxf1        |
| GO_BP_m3GO:000610 2-oxogluta    | 1/539  | 19/23843  | 0.352485 | 0.644497 | 0.608128 | Dld          |
| GO_BP_m3GO:000634 methylation   | 1/539  | 19/23843  | 0.352485 | 0.644497 | 0.608128 | Uhrf1        |
| GO_BP_m3GO:000690 pinocytosis   | 1/539  | 19/23843  | 0.352485 | 0.644497 | 0.608128 | Mapkapk3     |
| GO_BP_m3GO:000820 androgen r    | 1/539  | 19/23843  | 0.352485 | 0.644497 | 0.608128 | Srd5a1       |
| GO_BP_m3GO:001015 regulation    | 1/539  | 19/23843  | 0.352485 | 0.644497 | 0.608128 | Twist1       |
| GO_BP_m3GO:001044 response tr   | 1/539  | 19/23843  | 0.352485 | 0.644497 | 0.608128 | Gip          |
| GO_BP_m3GO:001501 heparan su    | 1/539  | 19/23843  | 0.352485 | 0.644497 | 0.608128 | Ndst2        |
| GO_BP_m3GO:003221 negative re   | 1/539  | 19/23843  | 0.352485 | 0.644497 | 0.608128 | Gnl3l        |
| GO_BP_m3GO:003263 interleukin   | 1/539  | 19/23843  | 0.352485 | 0.644497 | 0.608128 | Prkc         |
| GO_BP_m3GO:003361 mitochond     | 1/539  | 19/23843  | 0.352485 | 0.644497 | 0.608128 | Bcs1l        |
| GO_BP_m3GO:003396 cytoplasmic   | 1/539  | 19/23843  | 0.352485 | 0.644497 | 0.608128 | Atxn2        |
| GO_BP_m3GO:003469 response tr   | 1/539  | 19/23843  | 0.352485 | 0.644497 | 0.608128 | P2ry6        |
| GO_BP_m3GO:003535 peroxisom     | 1/539  | 19/23843  | 0.352485 | 0.644497 | 0.608128 | Twist1       |

|                               |        |           |          |          |          |             |
|-------------------------------|--------|-----------|----------|----------|----------|-------------|
| GO_BP_m3GO:003574CD4-positi   | 1/539  | 19/23843  | 0.352485 | 0.644497 | 0.608128 | Prkcz       |
| GO_BP_m3GO:004562positive re  | 1/539  | 19/23843  | 0.352485 | 0.644497 | 0.608128 | Prkcz       |
| GO_BP_m3GO:004831mitochond    | 1/539  | 19/23843  | 0.352485 | 0.644497 | 0.608128 | Lrrk2       |
| GO_BP_m3GO:005077negative re  | 1/539  | 19/23843  | 0.352485 | 0.644497 | 0.608128 | Nlgn1       |
| GO_BP_m3GO:005101barbed-en    | 1/539  | 19/23843  | 0.352485 | 0.644497 | 0.608128 | Carmil2     |
| GO_BP_m3GO:005158regulation   | 1/539  | 19/23843  | 0.352485 | 0.644497 | 0.608128 | Gpm6b       |
| GO_BP_m3GO:005177positive re  | 1/539  | 19/23843  | 0.352485 | 0.644497 | 0.608128 | Lrrk2       |
| GO_BP_m3GO:005190regulation   | 1/539  | 19/23843  | 0.352485 | 0.644497 | 0.608128 | Lrrk2       |
| GO_BP_m3GO:006012regulation   | 1/539  | 19/23843  | 0.352485 | 0.644497 | 0.608128 | Ghrhr       |
| GO_BP_m3GO:006029cilium mov   | 1/539  | 19/23843  | 0.352485 | 0.644497 | 0.608128 | Mkks        |
| GO_BP_m3GO:007097bone matu    | 1/539  | 19/23843  | 0.352485 | 0.644497 | 0.608128 | Bmp2        |
| GO_BP_m3GO:007214epithelial c | 1/539  | 19/23843  | 0.352485 | 0.644497 | 0.608128 | Hes1        |
| GO_BP_m3GO:190001positive re  | 1/539  | 19/23843  | 0.352485 | 0.644497 | 0.608128 | Il17d       |
| GO_BP_m3GO:190042regulation   | 1/539  | 19/23843  | 0.352485 | 0.644497 | 0.608128 | Tfeb        |
| GO_BP_m3GO:190305positive re  | 1/539  | 19/23843  | 0.352485 | 0.644497 | 0.608128 | Carmil2     |
| GO_BP_m3GO:190552positive re  | 1/539  | 19/23843  | 0.352485 | 0.644497 | 0.608128 | Ccl5        |
| GO_BP_m3GO:200013regulation   | 1/539  | 19/23843  | 0.352485 | 0.644497 | 0.608128 | Hes1        |
| GO_BP_m3GO:200019positive re  | 1/539  | 19/23843  | 0.352485 | 0.644497 | 0.608128 | Oxt         |
| GO_BP_m3GO:200025positive re  | 1/539  | 19/23843  | 0.352485 | 0.644497 | 0.608128 | Hck         |
| GO_BP_m3GO:000961response tr  | 12/539 | 462/23843 | 0.353248 | 0.645181 | 0.608773 | Foxc2/Foxf  |
| GO_BP_m3GO:001097positive re  | 9/539  | 337/23843 | 0.353318 | 0.645181 | 0.608773 | Caprin1/Cu  |
| GO_BP_m3GO:004859eye morph    | 5/539  | 173/23843 | 0.353467 | 0.645181 | 0.608773 | Aqp5/Cdor   |
| GO_BP_m3GO:000709metaphase    | 2/539  | 55/23843  | 0.354061 | 0.645181 | 0.608773 | Mad211/Utk  |
| GO_BP_m3GO:003081regulation   | 2/539  | 55/23843  | 0.354061 | 0.645181 | 0.608773 | Avp/Rln3    |
| GO_BP_m3GO:004362regulation   | 2/539  | 55/23843  | 0.354061 | 0.645181 | 0.608773 | Hsf4/Klf2   |
| GO_BP_m3GO:004642negative re  | 2/539  | 55/23843  | 0.354061 | 0.645181 | 0.608773 | Lrrtm1/Nf2  |
| GO_BP_m3GO:190489negative re  | 2/539  | 55/23843  | 0.354061 | 0.645181 | 0.608773 | Lrrtm1/Nf2  |
| GO_BP_m3GO:001923sensory pe   | 4/539  | 133/23843 | 0.354249 | 0.645251 | 0.608839 | Chrna4/Gir  |
| GO_BP_m3GO:003032lung devel   | 6/539  | 214/23843 | 0.355108 | 0.646541 | 0.610056 | Foxf1/Hes1  |
| GO_BP_m3GO:001648protein pr   | 7/539  | 255/23843 | 0.355277 | 0.646574 | 0.610088 | Cd46/Dhcr   |
| GO_BP_m3GO:005148regulation   | 9/539  | 338/23843 | 0.356502 | 0.648528 | 0.611932 | Avp/Calb2,  |
| GO_BP_m3GO:000195regulation   | 3/539  | 94/23843  | 0.357542 | 0.649046 | 0.61242  | C1qtnf4/Pt  |
| GO_BP_m3GO:000906fatty acid   | 3/539  | 94/23843  | 0.357542 | 0.649046 | 0.61242  | Slc25a17/S  |
| GO_BP_m3GO:003051regulation   | 3/539  | 94/23843  | 0.357542 | 0.649046 | 0.61242  | Gdf5/Hes1,  |
| GO_BP_m3GO:003355multicellul  | 3/539  | 94/23843  | 0.357542 | 0.649046 | 0.61242  | Grik2/Tacr, |
| GO_BP_m3GO:200006positive re  | 3/539  | 94/23843  | 0.357542 | 0.649046 | 0.61242  | Lrrk2/Rnf14 |
| GO_BP_m3GO:003297regulation   | 10/539 | 380/23843 | 0.357708 | 0.649072 | 0.612445 | Dixdc1/Gpi  |
| GO_BP_m3GO:000176neuron mi    | 5/539  | 174/23843 | 0.357947 | 0.649232 | 0.612595 | Gpr173/Mc   |
| GO_BP_m3GO:001096regulation   | 2/539  | 56/23843  | 0.362248 | 0.654367 | 0.617441 | Mad211/Utk  |
| GO_BP_m3GO:001491positive re  | 2/539  | 56/23843  | 0.362248 | 0.654367 | 0.617441 | Ccl5/P2ry6  |
| GO_BP_m3GO:001644somatic re   | 2/539  | 56/23843  | 0.362248 | 0.654367 | 0.617441 | Exosc6/Mir  |
| GO_BP_m3GO:004478metaphase    | 2/539  | 56/23843  | 0.362248 | 0.654367 | 0.617441 | Mad211/Utk  |
| GO_BP_m3GO:190382positive re  | 9/539  | 340/23843 | 0.362881 | 0.654367 | 0.617441 | Ablim3/Cej  |
| GO_BP_m3GO:003300muscle cell  | 6/539  | 216/23843 | 0.363151 | 0.654367 | 0.617441 | Ccl5/Foxc2  |
| GO_BP_m3GO:003560protein de   | 3/539  | 95/23843  | 0.363716 | 0.654367 | 0.617441 | Jdp2/Lrrk2, |
| GO_BP_m3GO:004592positive re  | 3/539  | 95/23843  | 0.363716 | 0.654367 | 0.617441 | Bcl2l1/Nlgr |
| GO_BP_m3GO:004870oligodendr   | 3/539  | 95/23843  | 0.363716 | 0.654367 | 0.617441 | Hes1/Nkx6   |
| GO_BP_m3GO:200124negative re  | 3/539  | 95/23843  | 0.363716 | 0.654367 | 0.617441 | Bag5/Bcl2l  |



|                                |        |           |          |          |          |             |
|--------------------------------|--------|-----------|----------|----------|----------|-------------|
| GO_BP_m3GO:000801blood circu   | 12/539 | 467/23843 | 0.366856 | 0.654367 | 0.617441 | Abr/Adm2,   |
| GO_BP_m3GO:00550C striated mu  | 5/539  | 176/23843 | 0.366911 | 0.654367 | 0.617441 | Ctdp1/Finc  |
| GO_BP_m3GO:000194lymphangi     | 1/539  | 20/23843  | 0.367135 | 0.654367 | 0.617441 | Foxc2       |
| GO_BP_m3GO:00030E positive re  | 1/539  | 20/23843  | 0.367135 | 0.654367 | 0.617441 | Avp         |
| GO_BP_m3GO:00065E melanin m    | 1/539  | 20/23843  | 0.367135 | 0.654367 | 0.617441 | Trpc1       |
| GO_BP_m3GO:00068E cellular soc | 1/539  | 20/23843  | 0.367135 | 0.654367 | 0.617441 | Sgk1        |
| GO_BP_m3GO:001087regulation    | 1/539  | 20/23843  | 0.367135 | 0.654367 | 0.617441 | Ptch1       |
| GO_BP_m3GO:00157E prostaglan   | 1/539  | 20/23843  | 0.367135 | 0.654367 | 0.617441 | Oxt         |
| GO_BP_m3GO:003054female gen    | 1/539  | 20/23843  | 0.367135 | 0.654367 | 0.617441 | Srd5a1      |
| GO_BP_m3GO:00309E establishm   | 1/539  | 20/23843  | 0.367135 | 0.654367 | 0.617441 | Rhob        |
| GO_BP_m3GO:003144regulation    | 1/539  | 20/23843  | 0.367135 | 0.654367 | 0.617441 | Ctr9        |
| GO_BP_m3GO:003164negative re   | 1/539  | 20/23843  | 0.367135 | 0.654367 | 0.617441 | Avp         |
| GO_BP_m3GO:003214activation    | c1/539 | 20/23843  | 0.367135 | 0.654367 | 0.617441 | Prkcz       |
| GO_BP_m3GO:00323C regulation   | 1/539  | 20/23843  | 0.367135 | 0.654367 | 0.617441 | Oxt         |
| GO_BP_m3GO:00323E positive re  | 1/539  | 20/23843  | 0.367135 | 0.654367 | 0.617441 | Gdf5        |
| GO_BP_m3GO:003261interleukin   | 1/539  | 20/23843  | 0.367135 | 0.654367 | 0.617441 | Prkcz       |
| GO_BP_m3GO:00330E negative re  | 1/539  | 20/23843  | 0.367135 | 0.654367 | 0.617441 | Ccl5        |
| GO_BP_m3GO:004244progestero    | 1/539  | 20/23843  | 0.367135 | 0.654367 | 0.617441 | Srd5a1      |
| GO_BP_m3GO:00435C skeletal mu  | 1/539  | 20/23843  | 0.367135 | 0.654367 | 0.617441 | Myod1       |
| GO_BP_m3GO:004434fibroblast a  | 1/539  | 20/23843  | 0.367135 | 0.654367 | 0.617441 | Ier3ip1     |
| GO_BP_m3GO:00504E positive re  | 1/539  | 20/23843  | 0.367135 | 0.654367 | 0.617441 | Ctdp1       |
| GO_BP_m3GO:006132cell prolifer | 1/539  | 20/23843  | 0.367135 | 0.654367 | 0.617441 | Hes1        |
| GO_BP_m3GO:007217metaneph      | 1/539  | 20/23843  | 0.367135 | 0.654367 | 0.617441 | Hes1        |
| GO_BP_m3GO:007224metaneph      | 1/539  | 20/23843  | 0.367135 | 0.654367 | 0.617441 | Hes1        |
| GO_BP_m3GO:00900E positive re  | 1/539  | 20/23843  | 0.367135 | 0.654367 | 0.617441 | Foxc2       |
| GO_BP_m3GO:00955C acetylcholin | 1/539  | 20/23843  | 0.367135 | 0.654367 | 0.617441 | Chrna4      |
| GO_BP_m3GO:19038E signal tran  | 1/539  | 20/23843  | 0.367135 | 0.654367 | 0.617441 | Chrna4      |
| GO_BP_m3GO:190514response tr   | 1/539  | 20/23843  | 0.367135 | 0.654367 | 0.617441 | Chrna4      |
| GO_BP_m3GO:190514cellular res  | 1/539  | 20/23843  | 0.367135 | 0.654367 | 0.617441 | Chrna4      |
| GO_BP_m3GO:200031regulation    | 1/539  | 20/23843  | 0.367135 | 0.654367 | 0.617441 | Nlgn1       |
| GO_BP_m3GO:003032respiratory   | 6/539  | 217/23843 | 0.367177 | 0.654367 | 0.617441 | Foxf1/Hes1  |
| GO_BP_m3GO:009027regulation    | 6/539  | 217/23843 | 0.367177 | 0.654367 | 0.617441 | Ccl5/Ghrhr  |
| GO_BP_m3GO:00097E post-embr    | 4/539  | 136/23843 | 0.369657 | 0.656293 | 0.619258 | Atf5/Helt/  |
| GO_BP_m3GO:001657histone me    | 4/539  | 136/23843 | 0.369657 | 0.656293 | 0.619258 | Ctr9/Kdm4   |
| GO_BP_m3GO:00083C associative  | 3/539  | 96/23843  | 0.36988  | 0.656293 | 0.619258 | Sgk1/Tacr1  |
| GO_BP_m3GO:00442E cellular pol | 3/539  | 96/23843  | 0.36988  | 0.656293 | 0.619258 | B3gnt6/Phl  |
| GO_BP_m3GO:00486E positive re  | 3/539  | 96/23843  | 0.36988  | 0.656293 | 0.619258 | Ccl5/Hpgd   |
| GO_BP_m3GO:00902E positive re  | 3/539  | 96/23843  | 0.36988  | 0.656293 | 0.619258 | Dixdc1/Fan  |
| GO_BP_m3GO:00987E macromole    | 3/539  | 96/23843  | 0.36988  | 0.656293 | 0.619258 | Jdp2/Lrrk2, |
| GO_BP_m3GO:003021T cell differ | 7/539  | 259/23843 | 0.369997 | 0.656293 | 0.619258 | Aire/Cd46/  |
| GO_BP_m3GO:00158C acidic amin  | 2/539  | 57/23843  | 0.370397 | 0.656293 | 0.619258 | Avp/Syt4    |
| GO_BP_m3GO:00190E viral gene   | 2/539  | 57/23843  | 0.370397 | 0.656293 | 0.619258 | Ccl5/Ctdp1  |
| GO_BP_m3GO:00434E regulation   | 2/539  | 57/23843  | 0.370397 | 0.656293 | 0.619258 | BC048507/   |
| GO_BP_m3GO:004851circadian b   | 2/539  | 57/23843  | 0.370397 | 0.656293 | 0.619258 | Ghrhr/Nlgr  |
| GO_BP_m3GO:006011inner ear r   | 2/539  | 57/23843  | 0.370397 | 0.656293 | 0.619258 | Hes1/Whrr   |
| GO_BP_m3GO:20007E regulation   | 2/539  | 57/23843  | 0.370397 | 0.656293 | 0.619258 | Hes1/Trim   |
| GO_BP_m3GO:00018E tissue hom   | 6/539  | 218/23843 | 0.371204 | 0.657181 | 0.620096 | Ihh/Mkks/   |
| GO_BP_m3GO:00071E G-protein    | 6/539  | 218/23843 | 0.371204 | 0.657181 | 0.620096 | Adm2/Ghrl   |

|                                     |           |          |          |          |             |
|-------------------------------------|-----------|----------|----------|----------|-------------|
| GO_BP_m3GO:000697response tr10/539  | 385/23843 | 0.372775 | 0.659691 | 0.622464 | Ankzf1/Bac  |
| GO_BP_m3GO:000626DNA replic7/539    | 260/23843 | 0.373684 | 0.660888 | 0.623594 | Areg/Enpp   |
| GO_BP_m3GO:003133negative re4/539   | 137/23843 | 0.374789 | 0.660888 | 0.623594 | Mkks/Prkc   |
| GO_BP_m3GO:000165eye develo10/539   | 386/23843 | 0.375797 | 0.660888 | 0.623594 | Aqp5/Cdor   |
| GO_BP_m3GO:003009lymphocytc10/539   | 386/23843 | 0.375797 | 0.660888 | 0.623594 | Aire/Cd46/  |
| GO_BP_m3GO:003476negative re3/539   | 97/23843  | 0.376034 | 0.660888 | 0.623594 | Hamp2/Stc   |
| GO_BP_m3GO:004852negative re3/539   | 97/23843  | 0.376034 | 0.660888 | 0.623594 | Ccl5/Isg20/ |
| GO_BP_m3GO:000301circulatory 12/539 | 471/23843 | 0.377795 | 0.660888 | 0.623594 | Abr/Adm2/   |
| GO_BP_m3GO:000201morphoge12/539     | 58/23843  | 0.378503 | 0.660888 | 0.623594 | Plet1/Carr  |
| GO_BP_m3GO:000238immunoglc2/539     | 58/23843  | 0.378503 | 0.660888 | 0.623594 | Exosc6/Mir  |
| GO_BP_m3GO:000635DNA-temp2/539      | 58/23843  | 0.378503 | 0.660888 | 0.623594 | Ctr9/Sox10  |
| GO_BP_m3GO:003083negative re2/539   | 58/23843  | 0.378503 | 0.660888 | 0.623594 | Mkks/Carr   |
| GO_BP_m3GO:004574positive re2/539   | 58/23843  | 0.378503 | 0.660888 | 0.623594 | Areg/Ucn    |
| GO_BP_m3GO:004663positive re2/539   | 58/23843  | 0.378503 | 0.660888 | 0.623594 | Ihh/Prkc    |
| GO_BP_m3GO:004663regulation 2/539   | 58/23843  | 0.378503 | 0.660888 | 0.623594 | Ihh/Prkc    |
| GO_BP_m3GO:004828lung alveol2/539   | 58/23843  | 0.378503 | 0.660888 | 0.623594 | Foxf1/Tcf2/ |
| GO_BP_m3GO:006003cardiac mu2/539    | 58/23843  | 0.378503 | 0.660888 | 0.623594 | Foxc2/Tgft  |
| GO_BP_m3GO:006044mammary 2/539      | 58/23843  | 0.378503 | 0.660888 | 0.623594 | Areg/Ptch1  |
| GO_BP_m3GO:200123negative re6/539   | 220/23843 | 0.379263 | 0.660888 | 0.623594 | Avp/Bag5/   |
| GO_BP_m3GO:190199negative re4/539   | 138/23843 | 0.379917 | 0.660888 | 0.623594 | Fanci/Ier3/ |
| GO_BP_m3GO:000007cell cycle cl5/539 | 179/23843 | 0.380362 | 0.660888 | 0.623594 | Bcl2l1/Fanc |
| GO_BP_m3GO:004320response tr5/539   | 179/23843 | 0.380362 | 0.660888 | 0.623594 | Bcl2l1/Mir1 |
| GO_BP_m3GO:003007peptide ho7/539    | 262/23843 | 0.381063 | 0.660888 | 0.623594 | Ccl5/Ghrhr  |
| GO_BP_m3GO:007259establishm11/539   | 430/23843 | 0.381303 | 0.660888 | 0.623594 | Ablim3/He   |
| GO_BP_m3GO:000197neurologic1/539    | 21/23843  | 0.381453 | 0.660888 | 0.623594 | Tacr1       |
| GO_BP_m3GO:000635DNA-temp1/539      | 21/23843  | 0.381453 | 0.660888 | 0.623594 | Dmtf1       |
| GO_BP_m3GO:001059positive re1/539   | 21/23843  | 0.381453 | 0.660888 | 0.623594 | Carmil2     |
| GO_BP_m3GO:001074regulation 1/539   | 21/23843  | 0.381453 | 0.660888 | 0.623594 | Prkch       |
| GO_BP_m3GO:001932hexose cat1/539    | 21/23843  | 0.381453 | 0.660888 | 0.623594 | Hk1         |
| GO_BP_m3GO:003193regulation 1/539   | 21/23843  | 0.381453 | 0.660888 | 0.623594 | Uhrf1       |
| GO_BP_m3GO:003204mitochond1/539     | 21/23843  | 0.381453 | 0.660888 | 0.623594 | Mgme1       |
| GO_BP_m3GO:003296positive re1/539   | 21/23843  | 0.381453 | 0.660888 | 0.623594 | Ctr9        |
| GO_BP_m3GO:003362integrin act1/539  | 21/23843  | 0.381453 | 0.660888 | 0.623594 | Foxc2       |
| GO_BP_m3GO:003436protein-co1/539    | 21/23843  | 0.381453 | 0.660888 | 0.623594 | Gtf2e1      |
| GO_BP_m3GO:003469response tr1/539   | 21/23843  | 0.381453 | 0.660888 | 0.623594 | P2ry6       |
| GO_BP_m3GO:003630lymph vess1/539    | 21/23843  | 0.381453 | 0.660888 | 0.623594 | Foxc2       |
| GO_BP_m3GO:004505transcytosi1/539   | 21/23843  | 0.381453 | 0.660888 | 0.623594 | Pigr        |
| GO_BP_m3GO:004568negative re1/539   | 21/23843  | 0.381453 | 0.660888 | 0.623594 | Hes1        |
| GO_BP_m3GO:004572positive re1/539   | 21/23843  | 0.381453 | 0.660888 | 0.623594 | Avp         |
| GO_BP_m3GO:004663negative re1/539   | 21/23843  | 0.381453 | 0.660888 | 0.623594 | Ihh         |
| GO_BP_m3GO:004824eosinophil 1/539   | 21/23843  | 0.381453 | 0.660888 | 0.623594 | Ccl5        |
| GO_BP_m3GO:004848parasympa1/539     | 21/23843  | 0.381453 | 0.660888 | 0.623594 | Hes1        |
| GO_BP_m3GO:005145myoblast p1/539    | 21/23843  | 0.381453 | 0.660888 | 0.623594 | Myod1       |
| GO_BP_m3GO:006105regulation 1/539   | 21/23843  | 0.381453 | 0.660888 | 0.623594 | Ctdp1       |
| GO_BP_m3GO:007084inclusion b1/539   | 21/23843  | 0.381453 | 0.660888 | 0.623594 | Bag5        |
| GO_BP_m3GO:007086regulation 1/539   | 21/23843  | 0.381453 | 0.660888 | 0.623594 | Tmem30b     |
| GO_BP_m3GO:007264interferon-1/539   | 21/23843  | 0.381453 | 0.660888 | 0.623594 | Carmil2     |
| GO_BP_m3GO:009028positive re1/539   | 21/23843  | 0.381453 | 0.660888 | 0.623594 | Ucn         |

|                   |              |        |           |          |          |          |             |
|-------------------|--------------|--------|-----------|----------|----------|----------|-------------|
| GO_BP_m3GO:190012 | regulation   | 1/539  | 21/23843  | 0.381453 | 0.660888 | 0.623594 | Ptprf       |
| GO_BP_m3GO:190152 | positive re  | 1/539  | 21/23843  | 0.381453 | 0.660888 | 0.623594 | Bmp2        |
| GO_BP_m3GO:190174 | positive re  | 1/539  | 21/23843  | 0.381453 | 0.660888 | 0.623594 | Myod1       |
| GO_BP_m3GO:200020 | regulation   | 1/539  | 21/23843  | 0.381453 | 0.660888 | 0.623594 | Bcl2l1      |
| GO_BP_m3GO:200067 | negative re  | 1/539  | 21/23843  | 0.381453 | 0.660888 | 0.623594 | Hes1        |
| GO_BP_m3GO:003209 | negative re  | 3/539  | 98/23843  | 0.382175 | 0.661338 | 0.624019 | Gnl3l/Lrrk2 |
| GO_BP_m3GO:004231 | vasoconstric | 3/539  | 98/23843  | 0.382175 | 0.661338 | 0.624019 | Avp/Mkks/   |
| GO_BP_m3GO:004642 | positive re  | 3/539  | 98/23843  | 0.382175 | 0.661338 | 0.624019 | Ccl5/Crlf1/ |
| GO_BP_m3GO:000646 | negative re  | 6/539  | 221/23843 | 0.383294 | 0.662474 | 0.62509  | Dusp26/Lrr  |
| GO_BP_m3GO:001585 | organic hydr | 6/539  | 221/23843 | 0.383294 | 0.662474 | 0.62509  | Chrna4/Gp   |
| GO_BP_m3GO:001607 | rRNA meta    | 6/539  | 221/23843 | 0.383294 | 0.662474 | 0.62509  | Dis3/Exosc  |
| GO_BP_m3GO:003569 | cellular res | 9/539  | 347/23843 | 0.385295 | 0.663199 | 0.625774 | Ankzf1/Chr  |
| GO_BP_m3GO:000271 | regulation   | 2/539  | 59/23843  | 0.386566 | 0.663199 | 0.625774 | Exosc6/Mir  |
| GO_BP_m3GO:000288 | regulation   | 2/539  | 59/23843  | 0.386566 | 0.663199 | 0.625774 | Exosc6/Mir  |
| GO_BP_m3GO:000762 | rhythmic b   | 2/539  | 59/23843  | 0.386566 | 0.663199 | 0.625774 | Ghrhr/Nlgr  |
| GO_BP_m3GO:003272 | positive re  | 2/539  | 59/23843  | 0.386566 | 0.663199 | 0.625774 | Ccl5/Twist1 |
| GO_BP_m3GO:004684 | filopodium   | 2/539  | 59/23843  | 0.386566 | 0.663199 | 0.625774 | Nlgn1/Tgfb  |
| GO_BP_m3GO:005105 | negative re  | 2/539  | 59/23843  | 0.386566 | 0.663199 | 0.625774 | Arhgap25/   |
| GO_BP_m3GO:005130 | mitotic sist | 2/539  | 59/23843  | 0.386566 | 0.663199 | 0.625774 | Mad21l/Utr  |
| GO_BP_m3GO:006071 | labyrinthin  | 2/539  | 59/23843  | 0.386566 | 0.663199 | 0.625774 | Esx1/Hes1   |
| GO_BP_m3GO:006098 | endocrine    | 12/539 | 59/23843  | 0.386566 | 0.663199 | 0.625774 | Ucn/Ucn2    |
| GO_BP_m3GO:007020 | protein trin | 2/539  | 59/23843  | 0.386566 | 0.663199 | 0.625774 | Hsf4/Trim6  |
| GO_BP_m3GO:007023 | T cell apop  | 2/539  | 59/23843  | 0.386566 | 0.663199 | 0.625774 | Ccl5/Tsc22  |
| GO_BP_m3GO:001481 | muscle cell  | 3/539  | 99/23843  | 0.388303 | 0.663199 | 0.625774 | Ccl5/P2ry6. |
| GO_BP_m3GO:002151 | spinal cord  | 3/539  | 99/23843  | 0.388303 | 0.663199 | 0.625774 | Mir19a/Nk   |
| GO_BP_m3GO:012003 | positive re  | 3/539  | 99/23843  | 0.388303 | 0.663199 | 0.625774 | Nlgn1/Carr  |
| GO_BP_m3GO:190180 | positive re  | 3/539  | 99/23843  | 0.388303 | 0.663199 | 0.625774 | Lrrk2/Rnf14 |
| GO_BP_m3GO:004687 | hormone s    | 9/539  | 348/23843 | 0.388506 | 0.663199 | 0.625774 | Ccl5/Ghrhr  |
| GO_BP_m3GO:000645 | protein folk | 5/539  | 181/23843 | 0.389326 | 0.663199 | 0.625774 | Bag5/Cryaa  |
| GO_BP_m3GO:000206 | columnar/c   | 4/539  | 140/23843 | 0.390159 | 0.663199 | 0.625774 | Bmp2/Hes1   |
| GO_BP_m3GO:004558 | regulation   | 4/539  | 140/23843 | 0.390159 | 0.663199 | 0.625774 | Cd46/Ihh/F  |
| GO_BP_m3GO:004663 | alpha-beta   | 4/539  | 140/23843 | 0.390159 | 0.663199 | 0.625774 | Ihh/Nkx2-3  |
| GO_BP_m3GO:005072 | negative re  | 4/539  | 140/23843 | 0.390159 | 0.663199 | 0.625774 | Abr/Foxf1/  |
| GO_BP_m3GO:009013 | tissue migr  | 7/539  | 265/23843 | 0.39214  | 0.663199 | 0.625774 | Foxc2/Foxf  |
| GO_BP_m3GO:003134 | positive re  | 11/539 | 434/23843 | 0.392814 | 0.663199 | 0.625774 | Caprin1/Cu  |
| GO_BP_m3GO:003526 | organ grov   | 5/539  | 182/23843 | 0.393804 | 0.663199 | 0.625774 | Col27a1/Ct  |
| GO_BP_m3GO:000717 | epidermal    | 3/539  | 100/23843 | 0.394416 | 0.663199 | 0.625774 | Areg/Pigr/l |
| GO_BP_m3GO:000718 | adenylate    | 3/539  | 100/23843 | 0.394416 | 0.663199 | 0.625774 | Adm2/Ghrl   |
| GO_BP_m3GO:003162 | receptor in  | 3/539  | 100/23843 | 0.394416 | 0.663199 | 0.625774 | Atxn2/Lrrtr |
| GO_BP_m3GO:003209 | positive re  | 3/539  | 100/23843 | 0.394416 | 0.663199 | 0.625774 | Bmp2/Gnl3   |
| GO_BP_m3GO:005198 | regulation   | 3/539  | 100/23843 | 0.394416 | 0.663199 | 0.625774 | Axin2/Mad   |
| GO_BP_m3GO:190489 | positive re  | 3/539  | 100/23843 | 0.394416 | 0.663199 | 0.625774 | Ccl5/Crlf1/ |
| GO_BP_m3GO:190526 | positive re  | 3/539  | 100/23843 | 0.394416 | 0.663199 | 0.625774 | Ctr9/Jdp2/  |
| GO_BP_m3GO:000704 | lysosome c   | 2/539  | 60/23843  | 0.394582 | 0.663199 | 0.625774 | Lrrk2/Tfeb  |
| GO_BP_m3GO:003369 | cellular pol | 2/539  | 60/23843  | 0.394582 | 0.663199 | 0.625774 | B3gnt6/Phl  |
| GO_BP_m3GO:003590 | aorta devel  | 2/539  | 60/23843  | 0.394582 | 0.663199 | 0.625774 | Hes1/Tfap2  |
| GO_BP_m3GO:005508 | anion hom    | 2/539  | 60/23843  | 0.394582 | 0.663199 | 0.625774 | Slc12a7/Tf  |
| GO_BP_m3GO:008017 | lytic vacuol | 2/539  | 60/23843  | 0.394582 | 0.663199 | 0.625774 | Lrrk2/Tfeb  |

|                                       |           |          |          |          |             |
|---------------------------------------|-----------|----------|----------|----------|-------------|
| GO_BP_m3GO:190581regulation 2/539     | 60/23843  | 0.394582 | 0.663199 | 0.625774 | Mad211/Ult  |
| GO_BP_m3GO:004477mitotic cell 9/539   | 350/23843 | 0.39493  | 0.663199 | 0.625774 | Ctdp1/Fan   |
| GO_BP_m3GO:00064C RNA catabi6/539     | 224/23843 | 0.395386 | 0.663199 | 0.625774 | Axin2/Dis3  |
| GO_BP_m3GO:00224C positive reç6/539   | 224/23843 | 0.395386 | 0.663199 | 0.625774 | Ccl5/Cd46/  |
| GO_BP_m3GO:00020C auditory re 1/539   | 22/23843  | 0.395449 | 0.663199 | 0.625774 | Whrn        |
| GO_BP_m3GO:000327endocardia1/539      | 22/23843  | 0.395449 | 0.663199 | 0.625774 | Tgfbr1      |
| GO_BP_m3GO:00033E epithelial c 1/539  | 22/23843  | 0.395449 | 0.663199 | 0.625774 | Ak7         |
| GO_BP_m3GO:00067C steroid cati1/539   | 22/23843  | 0.395449 | 0.663199 | 0.625774 | Ugt1a7c     |
| GO_BP_m3GO:00068C serotonin t 1/539   | 22/23843  | 0.395449 | 0.663199 | 0.625774 | Gpm6b       |
| GO_BP_m3GO:00070C regulation 1/539    | 22/23843  | 0.395449 | 0.663199 | 0.625774 | Axin2       |
| GO_BP_m3GO:000714male meioi1/539      | 22/23843  | 0.395449 | 0.663199 | 0.625774 | Mov1011     |
| GO_BP_m3GO:00072C nitric oxide 1/539  | 22/23843  | 0.395449 | 0.663199 | 0.625774 | Rasd1       |
| GO_BP_m3GO:00085C respiratory 1/539   | 22/23843  | 0.395449 | 0.663199 | 0.625774 | Bcs11       |
| GO_BP_m3GO:001587norepinept1/539      | 22/23843  | 0.395449 | 0.663199 | 0.625774 | Oxt         |
| GO_BP_m3GO:00182C peptidyl-gl1/539    | 22/23843  | 0.395449 | 0.663199 | 0.625774 | Ttl4        |
| GO_BP_m3GO:002154subpallium 1/539     | 22/23843  | 0.395449 | 0.663199 | 0.625774 | Mkks        |
| GO_BP_m3GO:00302E growth hor1/539     | 22/23843  | 0.395449 | 0.663199 | 0.625774 | Ghrhr       |
| GO_BP_m3GO:00327E positive reç1/539   | 22/23843  | 0.395449 | 0.663199 | 0.625774 | Prkc        |
| GO_BP_m3GO:00328C negative re1/539    | 22/23843  | 0.395449 | 0.663199 | 0.625774 | Ccl5        |
| GO_BP_m3GO:00344C response tr1/539    | 22/23843  | 0.395449 | 0.663199 | 0.625774 | Klf2        |
| GO_BP_m3GO:00350C negative re1/539    | 22/23843  | 0.395449 | 0.663199 | 0.625774 | Scai        |
| GO_BP_m3GO:00356C response tr1/539    | 22/23843  | 0.395449 | 0.663199 | 0.625774 | Gsta2       |
| GO_BP_m3GO:00420C protein refr1/539   | 22/23843  | 0.395449 | 0.663199 | 0.625774 | Bag5        |
| GO_BP_m3GO:004257retinoic aci 1/539   | 22/23843  | 0.395449 | 0.663199 | 0.625774 | Lcn5        |
| GO_BP_m3GO:00434C regulation 1/539    | 22/23843  | 0.395449 | 0.663199 | 0.625774 | Gnl3l       |
| GO_BP_m3GO:004594positive reç1/539    | 22/23843  | 0.395449 | 0.663199 | 0.625774 | Ippk        |
| GO_BP_m3GO:00483C paraxial mç1/539    | 22/23843  | 0.395449 | 0.663199 | 0.625774 | Foxc2       |
| GO_BP_m3GO:005104regulation 1/539     | 22/23843  | 0.395449 | 0.663199 | 0.625774 | Pacsin3     |
| GO_BP_m3GO:00518E mitochond 1/539     | 22/23843  | 0.395449 | 0.663199 | 0.625774 | Lrrk2       |
| GO_BP_m3GO:00604C trachea de1/539     | 22/23843  | 0.395449 | 0.663199 | 0.625774 | Foxf1       |
| GO_BP_m3GO:00606C branch elo1/539     | 22/23843  | 0.395449 | 0.663199 | 0.625774 | Areg        |
| GO_BP_m3GO:00702C positive reç1/539   | 22/23843  | 0.395449 | 0.663199 | 0.625774 | Ccl5        |
| GO_BP_m3GO:007121cellular res1/539    | 22/23843  | 0.395449 | 0.663199 | 0.625774 | Ankzf1      |
| GO_BP_m3GO:007187cellular res1/539    | 22/23843  | 0.395449 | 0.663199 | 0.625774 | Lrrk2       |
| GO_BP_m3GO:007227metaneph1/539        | 22/23843  | 0.395449 | 0.663199 | 0.625774 | Hes1        |
| GO_BP_m3GO:190027positive reç1/539    | 22/23843  | 0.395449 | 0.663199 | 0.625774 | Ptpn5       |
| GO_BP_m3GO:190074positive reç1/539    | 22/23843  | 0.395449 | 0.663199 | 0.625774 | Bmp2        |
| GO_BP_m3GO:190364regulation 1/539     | 22/23843  | 0.395449 | 0.663199 | 0.625774 | Lrrk2       |
| GO_BP_m3GO:19038C positive reç1/539   | 22/23843  | 0.395449 | 0.663199 | 0.625774 | Syt4        |
| GO_BP_m3GO:00442C cellular cari 7/539 | 266/23843 | 0.395833 | 0.663585 | 0.626138 | B3gnt6/Ful  |
| GO_BP_m3GO:00508C negative re5/539    | 183/23843 | 0.39828  | 0.667427 | 0.629763 | Abr/Btn1a1  |
| GO_BP_m3GO:00073C single fertil4/539  | 142/23843 | 0.400378 | 0.66986  | 0.632059 | Adam24/C    |
| GO_BP_m3GO:000914nucleoside 4/539     | 142/23843 | 0.400378 | 0.66986  | 0.632059 | Ak7/Bcl2l1, |
| GO_BP_m3GO:004801phosphatic4/539      | 142/23843 | 0.400378 | 0.66986  | 0.632059 | Ccl5/Exoc1  |
| GO_BP_m3GO:00060C aminoglycç3/539     | 101/23843 | 0.400512 | 0.66986  | 0.632059 | B3gnt6/Itih |
| GO_BP_m3GO:00071E homophilic3/539     | 101/23843 | 0.400512 | 0.66986  | 0.632059 | Cdh26/Dsc   |
| GO_BP_m3GO:00069E humoral irr9/539    | 352/23843 | 0.401359 | 0.670803 | 0.632949 | Aire/Cd46/  |
| GO_BP_m3GO:00181C peptidyl-ty8/539    | 310/23843 | 0.402458 | 0.670803 | 0.632949 | Areg/Ccl5/  |

|                   |                     |           |          |          |          |            |
|-------------------|---------------------|-----------|----------|----------|----------|------------|
| GO_BP_m3GO:000322 | ventricular 2/539   | 61/23843  | 0.40255  | 0.670803 | 0.632949 | Foxc2/Tgfb |
| GO_BP_m3GO:001017 | body morph 2/539    | 61/23843  | 0.40255  | 0.670803 | 0.632949 | Cdon/Ihh   |
| GO_BP_m3GO:001644 | somatic div 2/539   | 61/23843  | 0.40255  | 0.670803 | 0.632949 | Exosc6/Mir |
| GO_BP_m3GO:003085 | positive reg 2/539  | 61/23843  | 0.40255  | 0.670803 | 0.632949 | Prkch/Ptch |
| GO_BP_m3GO:200123 | positive reg 2/539  | 61/23843  | 0.40255  | 0.670803 | 0.632949 | Pdia3/Wwc  |
| GO_BP_m3GO:005125 | protein pol 7/539   | 268/23843 | 0.40322  | 0.670803 | 0.632949 | Mkks/Map   |
| GO_BP_m3GO:000918 | cyclic nucle 4/539  | 143/23843 | 0.405476 | 0.670803 | 0.632949 | Avp/Ghrhr  |
| GO_BP_m3GO:003085 | regulation 4/539    | 143/23843 | 0.405476 | 0.670803 | 0.632949 | Hes1/Prkch |
| GO_BP_m3GO:200005 | regulation 4/539    | 143/23843 | 0.405476 | 0.670803 | 0.632949 | Bag5/Lrrk2 |
| GO_BP_m3GO:000195 | regulation 3/539    | 102/23843 | 0.406592 | 0.670803 | 0.632949 | Gpm6b/Plc  |
| GO_BP_m3GO:000682 | chloride tra 3/539  | 102/23843 | 0.406592 | 0.670803 | 0.632949 | Cln1/P2ry  |
| GO_BP_m3GO:003355 | unsaturate 3/539    | 102/23843 | 0.406592 | 0.670803 | 0.632949 | Avp/Cyp2c  |
| GO_BP_m3GO:004851 | rhythmic p 7/539    | 269/23843 | 0.406912 | 0.670803 | 0.632949 | Atf5/Ghrhr |
| GO_BP_m3GO:190303 | regulation 7/539    | 269/23843 | 0.406912 | 0.670803 | 0.632949 | Btn1a1/Ccl |
| GO_BP_m3GO:004218 | cellular ket 5/539  | 185/23843 | 0.407222 | 0.670803 | 0.632949 | Avp/Bmp2   |
| GO_BP_m3GO:001003 | response tr 11/539  | 439/23843 | 0.407234 | 0.670803 | 0.632949 | Ankzf1/Cry |
| GO_BP_m3GO:007137 | cellular res 6/539  | 227/23843 | 0.407469 | 0.670803 | 0.632949 | Foxc2/Ghrh |
| GO_BP_m3GO:000073 | DNA catab 1/539     | 23/23843  | 0.409128 | 0.670803 | 0.632949 | Dnase1l3   |
| GO_BP_m3GO:000272 | regulation 1/539    | 23/23843  | 0.409128 | 0.670803 | 0.632949 | Prkcz      |
| GO_BP_m3GO:000290 | negative re 1/539   | 23/23843  | 0.409128 | 0.670803 | 0.632949 | Mir106b    |
| GO_BP_m3GO:000341 | endochonc 1/539     | 23/23843  | 0.409128 | 0.670803 | 0.632949 | Col27a1    |
| GO_BP_m3GO:000629 | mismatch r 1/539    | 23/23843  | 0.409128 | 0.670803 | 0.632949 | Axin2      |
| GO_BP_m3GO:000821 | glucocortic 1/539   | 23/23843  | 0.409128 | 0.670803 | 0.632949 | Bmp2       |
| GO_BP_m3GO:001657 | histone det 1/539   | 23/23843  | 0.409128 | 0.670803 | 0.632949 | Epop       |
| GO_BP_m3GO:001904 | modulator 1/539     | 23/23843  | 0.409128 | 0.670803 | 0.632949 | Bcl2l1     |
| GO_BP_m3GO:003014 | sphingolipi 1/539   | 23/23843  | 0.409128 | 0.670803 | 0.632949 | Enpp7      |
| GO_BP_m3GO:003164 | heat gener 1/539    | 23/23843  | 0.409128 | 0.670803 | 0.632949 | Ccl5       |
| GO_BP_m3GO:003237 | positive reg 1/539  | 23/23843  | 0.409128 | 0.670803 | 0.632949 | Ptch1      |
| GO_BP_m3GO:003237 | positive reg 1/539  | 23/23843  | 0.409128 | 0.670803 | 0.632949 | Ptch1      |
| GO_BP_m3GO:003410 | negative re 1/539   | 23/23843  | 0.409128 | 0.670803 | 0.632949 | Abr        |
| GO_BP_m3GO:004309 | cellular me 1/539   | 23/23843  | 0.409128 | 0.670803 | 0.632949 | Fuk        |
| GO_BP_m3GO:004357 | regulation 1/539    | 23/23843  | 0.409128 | 0.670803 | 0.632949 | Nlgn1      |
| GO_BP_m3GO:004826 | behavioral 1/539    | 23/23843  | 0.409128 | 0.670803 | 0.632949 | Tacr1      |
| GO_BP_m3GO:004848 | sympatheti 1/539    | 23/23843  | 0.409128 | 0.670803 | 0.632949 | Tfap2b     |
| GO_BP_m3GO:004879 | animal org 1/539    | 23/23843  | 0.409128 | 0.670803 | 0.632949 | Bmp2       |
| GO_BP_m3GO:006004 | regulation 1/539    | 23/23843  | 0.409128 | 0.670803 | 0.632949 | Fam170b    |
| GO_BP_m3GO:006115 | mRNA des 1/539      | 23/23843  | 0.409128 | 0.670803 | 0.632949 | Hnrnpr     |
| GO_BP_m3GO:007131 | cellular res 1/539  | 23/23843  | 0.409128 | 0.670803 | 0.632949 | Bcl2l1     |
| GO_BP_m3GO:007167 | positive reg 1/539  | 23/23843  | 0.409128 | 0.670803 | 0.632949 | Ccl5       |
| GO_BP_m3GO:007186 | cellular res 1/539  | 23/23843  | 0.409128 | 0.670803 | 0.632949 | Lrrk2      |
| GO_BP_m3GO:007186 | response tr 1/539   | 23/23843  | 0.409128 | 0.670803 | 0.632949 | Lrrk2      |
| GO_BP_m3GO:007220 | cell differer 1/539 | 23/23843  | 0.409128 | 0.670803 | 0.632949 | Tcf21      |
| GO_BP_m3GO:007220 | metaneph 1/539      | 23/23843  | 0.409128 | 0.670803 | 0.632949 | Hes1       |
| GO_BP_m3GO:009034 | negative re 1/539   | 23/23843  | 0.409128 | 0.670803 | 0.632949 | Twist1     |
| GO_BP_m3GO:009715 | neuronal st 1/539   | 23/23843  | 0.409128 | 0.670803 | 0.632949 | Hes1       |
| GO_BP_m3GO:190307 | negative re 1/539   | 23/23843  | 0.409128 | 0.670803 | 0.632949 | Bcl2l1     |
| GO_BP_m3GO:190367 | negative re 1/539   | 23/23843  | 0.409128 | 0.670803 | 0.632949 | Klf2       |
| GO_BP_m3GO:190470 | positive reg 1/539  | 23/23843  | 0.409128 | 0.670803 | 0.632949 | Hpgd       |

|                                     |           |          |          |          |             |
|-------------------------------------|-----------|----------|----------|----------|-------------|
| GO_BP_m3GO:200075negative re1/539   | 23/23843  | 0.409128 | 0.670803 | 0.632949 | Twist1      |
| GO_BP_m3GO:000636transcripti2/539   | 62/23843  | 0.410468 | 0.670803 | 0.632949 | Gtf2e1/Me   |
| GO_BP_m3GO:001591phospholip2/539    | 62/23843  | 0.410468 | 0.670803 | 0.632949 | Preli3a/Tr  |
| GO_BP_m3GO:004514homologot2/539     | 62/23843  | 0.410468 | 0.670803 | 0.632949 | Ankle1/Ccc  |
| GO_BP_m3GO:005186protein aut2/539   | 62/23843  | 0.410468 | 0.670803 | 0.632949 | Lrrk2/Uhrf1 |
| GO_BP_m3GO:005192negative re2/539   | 62/23843  | 0.410468 | 0.670803 | 0.632949 | Hes1/Pacsi  |
| GO_BP_m3GO:006004retina mor2/539    | 62/23843  | 0.410468 | 0.670803 | 0.632949 | Cdon/Ihh    |
| GO_BP_m3GO:190126carbohydr2/539     | 62/23843  | 0.410468 | 0.670803 | 0.632949 | Slc25a17/S  |
| GO_BP_m3GO:190367regulation 2/539   | 62/23843  | 0.410468 | 0.670803 | 0.632949 | Foxc2/Klf2  |
| GO_BP_m3GO:003017negative re4/539   | 144/23843 | 0.410566 | 0.670803 | 0.632949 | Axin2/Bmp   |
| GO_BP_m3GO:000728germ cell d7/539   | 270/23843 | 0.410603 | 0.670803 | 0.632949 | Bcl2l1/Cats |
| GO_BP_m3GO:005159response tr3/539   | 103/23843 | 0.412653 | 0.673278 | 0.635285 | Kcnmb4/N    |
| GO_BP_m3GO:006075regulation 3/539   | 103/23843 | 0.412653 | 0.673278 | 0.635285 | C1qtnf4/Pt  |
| GO_BP_m3GO:001821peptidyl-ty8/539   | 313/23843 | 0.412745 | 0.673278 | 0.635285 | Areg/Ccl5/  |
| GO_BP_m3GO:190129nucleoside 8/539   | 313/23843 | 0.412745 | 0.673278 | 0.635285 | Ak7/Avp/B   |
| GO_BP_m3GO:004211T cell activ12/539 | 484/23843 | 0.413548 | 0.674332 | 0.636279 | Aire/Btn1a  |
| GO_BP_m3GO:004801inositol lipi4/539 | 145/23843 | 0.415647 | 0.677101 | 0.638892 | Ccl5/Exoc1  |
| GO_BP_m3GO:00032Ccardiac cha5/539   | 187/23843 | 0.416147 | 0.677101 | 0.638892 | Foxc2/Foxf  |
| GO_BP_m3GO:00447Cmulti-mult 5/539   | 187/23843 | 0.416147 | 0.677101 | 0.638892 | Ggn/Hmx3    |
| GO_BP_m3GO:00069Cphagocyto:8/539    | 314/23843 | 0.416173 | 0.677101 | 0.638892 | Abr/Arhga   |
| GO_BP_m3GO:005072regulation 8/539   | 314/23843 | 0.416173 | 0.677101 | 0.638892 | Abr/Ccl5/C  |
| GO_BP_m3GO:000991hormone ti9/539    | 357/23843 | 0.417437 | 0.677101 | 0.638892 | Ccl5/Ghrhr  |
| GO_BP_m3GO:00454Ecell redox t2/539  | 63/23843  | 0.418334 | 0.677101 | 0.638892 | Dld/Pdia3   |
| GO_BP_m3GO:190247chloride tr2/539   | 63/23843  | 0.418334 | 0.677101 | 0.638892 | Clcn1/Slc1  |
| GO_BP_m3GO:000913nucleoside 3/539   | 104/23843 | 0.418694 | 0.677101 | 0.638892 | Ak7/Hk1/le  |
| GO_BP_m3GO:00300Ccellular mo3/539   | 104/23843 | 0.418694 | 0.677101 | 0.638892 | Avp/Lrrk2/  |
| GO_BP_m3GO:00487Cembryonic 3/539    | 104/23843 | 0.418694 | 0.677101 | 0.638892 | Foxc2/Tgfb  |
| GO_BP_m3GO:00977Enegative re3/539   | 104/23843 | 0.418694 | 0.677101 | 0.638892 | Avp/Mkks/   |
| GO_BP_m3GO:00517Eregulation 5/539   | 188/23843 | 0.420601 | 0.677101 | 0.638892 | Gpr3/Mad    |
| GO_BP_m3GO:00301EB cell differ4/539 | 146/23843 | 0.420719 | 0.677101 | 0.638892 | Gm13287/l   |
| GO_BP_m3GO:004341macromole7/539     | 273/23843 | 0.421668 | 0.677101 | 0.638892 | Trmo/Ctr9/  |
| GO_BP_m3GO:000182trophectod1/539    | 24/23843  | 0.422498 | 0.677101 | 0.638892 | Ctr9        |
| GO_BP_m3GO:000233mature B c1/539    | 24/23843  | 0.422498 | 0.677101 | 0.638892 | Nkx2-3      |
| GO_BP_m3GO:00030Enegative re1/539   | 24/23843  | 0.422498 | 0.677101 | 0.638892 | Ier3        |
| GO_BP_m3GO:000692inflammatic1/539   | 24/23843  | 0.422498 | 0.677101 | 0.638892 | Ccl5        |
| GO_BP_m3GO:00090Easpartate fi1/539  | 24/23843  | 0.422498 | 0.677101 | 0.638892 | Thnsl2      |
| GO_BP_m3GO:001061negative re1/539   | 24/23843  | 0.422498 | 0.677101 | 0.638892 | Ctdp1       |
| GO_BP_m3GO:001093regulation 1/539   | 24/23843  | 0.422498 | 0.677101 | 0.638892 | Ucn         |
| GO_BP_m3GO:001482vascular sr1/539   | 24/23843  | 0.422498 | 0.677101 | 0.638892 | Mkks        |
| GO_BP_m3GO:00218Eolfactory b1/539   | 24/23843  | 0.422498 | 0.677101 | 0.638892 | Atf5        |
| GO_BP_m3GO:00302Cheparan su1/539    | 24/23843  | 0.422498 | 0.677101 | 0.638892 | Ndst2       |
| GO_BP_m3GO:003057collagen ca1/539   | 24/23843  | 0.422498 | 0.677101 | 0.638892 | Prtn3       |
| GO_BP_m3GO:00420Enegative re1/539   | 24/23843  | 0.422498 | 0.677101 | 0.638892 | Ptprf       |
| GO_BP_m3GO:004504protein tar1/539   | 24/23843  | 0.422498 | 0.677101 | 0.638892 | Pmm1        |
| GO_BP_m3GO:00509Cpositive rec1/539  | 24/23843  | 0.422498 | 0.677101 | 0.638892 | Twist1      |
| GO_BP_m3GO:00517Enitric-oxid1/539   | 24/23843  | 0.422498 | 0.677101 | 0.638892 | Lrrk2       |
| GO_BP_m3GO:00517Eregulation 1/539   | 24/23843  | 0.422498 | 0.677101 | 0.638892 | Lrrk2       |
| GO_BP_m3GO:00517Eresponse tr1/539   | 24/23843  | 0.422498 | 0.677101 | 0.638892 | Ankzf1      |

|                                     |           |          |          |          |             |
|-------------------------------------|-----------|----------|----------|----------|-------------|
| GO_BP_m3GO:005502negative re1/539   | 24/23843  | 0.422498 | 0.677101 | 0.638892 | Ctdp1       |
| GO_BP_m3GO:00600C reflex 1/539      | 24/23843  | 0.422498 | 0.677101 | 0.638892 | Satb1       |
| GO_BP_m3GO:006111negative re1/539   | 24/23843  | 0.422498 | 0.677101 | 0.638892 | Ctdp1       |
| GO_BP_m3GO:006143establishm1/539    | 24/23843  | 0.422498 | 0.677101 | 0.638892 | Cela2a      |
| GO_BP_m3GO:007058mitochond 1/539    | 24/23843  | 0.422498 | 0.677101 | 0.638892 | Bcl2l1      |
| GO_BP_m3GO:007139cellular res1/539  | 24/23843  | 0.422498 | 0.677101 | 0.638892 | Myod1       |
| GO_BP_m3GO:007186response tr1/539   | 24/23843  | 0.422498 | 0.677101 | 0.638892 | Lrrk2       |
| GO_BP_m3GO:009002regulation 1/539   | 24/23843  | 0.422498 | 0.677101 | 0.638892 | Ccl5        |
| GO_BP_m3GO:190173regulation 1/539   | 24/23843  | 0.422498 | 0.677101 | 0.638892 | Myod1       |
| GO_BP_m3GO:190198negative re1/539   | 24/23843  | 0.422498 | 0.677101 | 0.638892 | Twist1      |
| GO_BP_m3GO:190223negative re1/539   | 24/23843  | 0.422498 | 0.677101 | 0.638892 | Bcl2l1      |
| GO_BP_m3GO:190301regulation 1/539   | 24/23843  | 0.422498 | 0.677101 | 0.638892 | Tmem119     |
| GO_BP_m3GO:190357negative re1/539   | 24/23843  | 0.422498 | 0.677101 | 0.638892 | Ier3        |
| GO_BP_m3GO:200117positive re1/539   | 24/23843  | 0.422498 | 0.677101 | 0.638892 | Bcl2l1      |
| GO_BP_m3GO:003476regulation 11/539  | 445/23843 | 0.424559 | 0.67964  | 0.641287 | Catsper4/C  |
| GO_BP_m3GO:003031osteoclast 13/539  | 105/23843 | 0.424715 | 0.67964  | 0.641287 | Ccl5/Tmem   |
| GO_BP_m3GO:003496histone lysi3/539  | 105/23843 | 0.424715 | 0.67964  | 0.641287 | Ctr9/Kdm4   |
| GO_BP_m3GO:006101regulation 3/539   | 105/23843 | 0.424715 | 0.67964  | 0.641287 | Axin2/Hnrr  |
| GO_BP_m3GO:000756embryo im2/539     | 64/23843  | 0.426146 | 0.680661 | 0.642251 | Ggn/Hmx3    |
| GO_BP_m3GO:003237positive re2/539   | 64/23843  | 0.426146 | 0.680661 | 0.642251 | Oxt/Ptch1   |
| GO_BP_m3GO:004333response tr2/539   | 64/23843  | 0.426146 | 0.680661 | 0.642251 | Gm13287/I   |
| GO_BP_m3GO:004682positive re2/539   | 64/23843  | 0.426146 | 0.680661 | 0.642251 | Lrrk2/Ptpn! |
| GO_BP_m3GO:006042lung morpl2/539    | 64/23843  | 0.426146 | 0.680661 | 0.642251 | Foxf1/Tcf2: |
| GO_BP_m3GO:001076regulation 8/539   | 317/23843 | 0.426451 | 0.680894 | 0.642471 | Caprin1/Cu  |
| GO_BP_m3GO:000268negative re11/539  | 448/23843 | 0.433219 | 0.685259 | 0.64659  | Abr/Btn1a1  |
| GO_BP_m3GO:000686lipid transp8/539  | 319/23843 | 0.433294 | 0.685259 | 0.64659  | Oxt/Ptch1/  |
| GO_BP_m3GO:005165establishm10/539   | 405/23843 | 0.433452 | 0.685259 | 0.64659  | Ankle1/Ap:  |
| GO_BP_m3GO:000229T cell differ2/539 | 65/23843  | 0.433903 | 0.685259 | 0.64659  | Cd46/Prkcz  |
| GO_BP_m3GO:000256somatic div2/539   | 65/23843  | 0.433903 | 0.685259 | 0.64659  | Exosc6/Mir  |
| GO_BP_m3GO:000314embryonic 2/539    | 65/23843  | 0.433903 | 0.685259 | 0.64659  | Hes1/Ihh    |
| GO_BP_m3GO:00063CDNA alkyl2/539     | 65/23843  | 0.433903 | 0.685259 | 0.64659  | Mov10l1/P   |
| GO_BP_m3GO:00063CDNA meth2/539      | 65/23843  | 0.433903 | 0.685259 | 0.64659  | Mov10l1/P   |
| GO_BP_m3GO:000651protein mo2/539    | 65/23843  | 0.433903 | 0.685259 | 0.64659  | Ctr9/Uhrf1  |
| GO_BP_m3GO:00074CD neuroblast 2/539 | 65/23843  | 0.433903 | 0.685259 | 0.64659  | Lrrk2/Sox1! |
| GO_BP_m3GO:001644somatic cel2/539   | 65/23843  | 0.433903 | 0.685259 | 0.64659  | Exosc6/Mir  |
| GO_BP_m3GO:003508axoneme a2/539     | 65/23843  | 0.433903 | 0.685259 | 0.64659  | Ak7/Cep13   |
| GO_BP_m3GO:000151prostaglan1/539    | 25/23843  | 0.435566 | 0.685259 | 0.64659  | Avp         |
| GO_BP_m3GO:000175organ indu1/539    | 25/23843  | 0.435566 | 0.685259 | 0.64659  | Bmp2        |
| GO_BP_m3GO:001074macrophag1/539     | 25/23843  | 0.435566 | 0.685259 | 0.64659  | Prkch       |
| GO_BP_m3GO:001089negative re1/539   | 25/23843  | 0.435566 | 0.685259 | 0.64659  | Bmp2        |
| GO_BP_m3GO:003114SCF-deper1/539     | 25/23843  | 0.435566 | 0.685259 | 0.64659  | Ccnf        |
| GO_BP_m3GO:003327response tr1/539   | 25/23843  | 0.435566 | 0.685259 | 0.64659  | Pdia3       |
| GO_BP_m3GO:003445microtubul1/539    | 25/23843  | 0.435566 | 0.685259 | 0.64659  | Ccdc187     |
| GO_BP_m3GO:004337positive re1/539   | 25/23843  | 0.435566 | 0.685259 | 0.64659  | Prkcz       |
| GO_BP_m3GO:004593negative re1/539   | 25/23843  | 0.435566 | 0.685259 | 0.64659  | Bmp2        |
| GO_BP_m3GO:004636monosacch1/539     | 25/23843  | 0.435566 | 0.685259 | 0.64659  | Hk1         |
| GO_BP_m3GO:004645prostanoid 1/539   | 25/23843  | 0.435566 | 0.685259 | 0.64659  | Avp         |
| GO_BP_m3GO:005077RNA destal1/539    | 25/23843  | 0.435566 | 0.685259 | 0.64659  | Hnrnpr      |

|                                     |           |          |          |          |             |
|-------------------------------------|-----------|----------|----------|----------|-------------|
| GO_BP_m3GO:005083defense re1/539    | 25/23843  | 0.435566 | 0.685259 | 0.64659  | Hamp2       |
| GO_BP_m3GO:005144positive re1/539   | 25/23843  | 0.435566 | 0.685259 | 0.64659  | Trib2       |
| GO_BP_m3GO:005145negative re1/539   | 25/23843  | 0.435566 | 0.685259 | 0.64659  | S1pr1       |
| GO_BP_m3GO:006000Sertoli cell 1/539 | 25/23843  | 0.435566 | 0.685259 | 0.64659  | Tcf21       |
| GO_BP_m3GO:007110protein K41/539    | 25/23843  | 0.435566 | 0.685259 | 0.64659  | Otud3       |
| GO_BP_m3GO:007180podosome 1/539     | 25/23843  | 0.435566 | 0.685259 | 0.64659  | Hck         |
| GO_BP_m3GO:007267eosinophil 1/539   | 25/23843  | 0.435566 | 0.685259 | 0.64659  | Ccl5        |
| GO_BP_m3GO:009014regulation 1/539   | 25/23843  | 0.435566 | 0.685259 | 0.64659  | Mir539      |
| GO_BP_m3GO:009886bone grow1/539     | 25/23843  | 0.435566 | 0.685259 | 0.64659  | Col27a1     |
| GO_BP_m3GO:190103negative re1/539   | 25/23843  | 0.435566 | 0.685259 | 0.64659  | Lrrk2       |
| GO_BP_m3GO:190118negative re1/539   | 25/23843  | 0.435566 | 0.685259 | 0.64659  | Ptprf       |
| GO_BP_m3GO:190320negative re1/539   | 25/23843  | 0.435566 | 0.685259 | 0.64659  | Lrrk2       |
| GO_BP_m3GO:190385regulation 1/539   | 25/23843  | 0.435566 | 0.685259 | 0.64659  | Syt4        |
| GO_BP_m3GO:190435negative re1/539   | 25/23843  | 0.435566 | 0.685259 | 0.64659  | Gnl3l       |
| GO_BP_m3GO:190437negative re1/539   | 25/23843  | 0.435566 | 0.685259 | 0.64659  | Bcl2l1      |
| GO_BP_m3GO:200103negative re1/539   | 25/23843  | 0.435566 | 0.685259 | 0.64659  | Lrrk2       |
| GO_BP_m3GO:004866regulation 4/539   | 149/23843 | 0.435867 | 0.68548  | 0.646798 | Ccl5/Hpgd   |
| GO_BP_m3GO:000007DNA dama3/539      | 107/23843 | 0.436691 | 0.685553 | 0.646867 | Fanci/ler3/ |
| GO_BP_m3GO:001907viral genon3/539   | 107/23843 | 0.436691 | 0.685553 | 0.646867 | Ccl5/lsg20/ |
| GO_BP_m3GO:004662regulation 3/539   | 107/23843 | 0.436691 | 0.685553 | 0.646867 | Ctdp1/Foxc  |
| GO_BP_m3GO:190382negative re3/539   | 107/23843 | 0.436691 | 0.685553 | 0.646867 | Bcl2l1/Gpr  |
| GO_BP_m3GO:002240regulation 9/539   | 363/23843 | 0.436711 | 0.685553 | 0.646867 | Bmp2/Btn1   |
| GO_BP_m3GO:000636rRNA proc5/539     | 192/23843 | 0.438354 | 0.687881 | 0.649064 | Dis3/Exosc  |
| GO_BP_m3GO:000028mitotic cytr2/539  | 66/23843  | 0.441604 | 0.690961 | 0.65197  | Ckap2/Rhc   |
| GO_BP_m3GO:000263regulation 2/539   | 66/23843  | 0.441604 | 0.690961 | 0.65197  | Exosc6/Mir  |
| GO_BP_m3GO:001406positive re2/539   | 66/23843  | 0.441604 | 0.690961 | 0.65197  | Ccl5/Prr5   |
| GO_BP_m3GO:005129centrosom1/2/539   | 66/23843  | 0.441604 | 0.690961 | 0.65197  | Ccnf/Cep1:  |
| GO_BP_m3GO:005502regulation 2/539   | 66/23843  | 0.441604 | 0.690961 | 0.65197  | Ctdp1/Tgft  |
| GO_BP_m3GO:190303positive re2/539   | 66/23843  | 0.441604 | 0.690961 | 0.65197  | Foxc2/Myo   |
| GO_BP_m3GO:190357regulation 2/539   | 66/23843  | 0.441604 | 0.690961 | 0.65197  | Bcl2l1/ler3 |
| GO_BP_m3GO:190551non-motile2/539    | 66/23843  | 0.441604 | 0.690961 | 0.65197  | Cep131/MI   |
| GO_BP_m3GO:000008G2/M trans3/539    | 108/23843 | 0.442644 | 0.691533 | 0.652509 | Fanci/ler3/ |
| GO_BP_m3GO:000597polysaccha3/539    | 108/23843 | 0.442644 | 0.691533 | 0.652509 | B3gnt6/Phl  |
| GO_BP_m3GO:001092cellular cor3/539  | 108/23843 | 0.442644 | 0.691533 | 0.652509 | lhh/Mybph   |
| GO_BP_m3GO:000640mRNA cate5/539     | 193/23843 | 0.442774 | 0.691533 | 0.652509 | Axin2/Dis3. |
| GO_BP_m3GO:001589drug trans5/539    | 193/23843 | 0.442774 | 0.691533 | 0.652509 | Aqp5/Chrn   |
| GO_BP_m3GO:003011regulation 7/539   | 279/23843 | 0.44373  | 0.692773 | 0.65368  | Axin2/Bmp   |
| GO_BP_m3GO:000276immune re8/539     | 323/23843 | 0.446953 | 0.692823 | 0.653727 | Btn1a1/Igh  |
| GO_BP_m3GO:000205positive re1/539   | 26/23843  | 0.44834  | 0.692823 | 0.653727 | Sox10       |
| GO_BP_m3GO:000208lens morph1/539    | 26/23843  | 0.44834  | 0.692823 | 0.653727 | Cryaa       |
| GO_BP_m3GO:000250tolerance ir1/539  | 26/23843  | 0.44834  | 0.692823 | 0.653727 | Aire        |
| GO_BP_m3GO:000631mitotic rec1/539   | 26/23843  | 0.44834  | 0.692823 | 0.653727 | Ankle1      |
| GO_BP_m3GO:000688cell volume1/539   | 26/23843  | 0.44834  | 0.692823 | 0.653727 | Slc12a7     |
| GO_BP_m3GO:001474negative re1/539   | 26/23843  | 0.44834  | 0.692823 | 0.653727 | Ctdp1       |
| GO_BP_m3GO:002151spinal cord1/539   | 26/23843  | 0.44834  | 0.692823 | 0.653727 | Nkx6-1      |
| GO_BP_m3GO:003021hyaluronan1/539    | 26/23843  | 0.44834  | 0.692823 | 0.653727 | Itih1       |
| GO_BP_m3GO:003026apoptotic r1/539   | 26/23843  | 0.44834  | 0.692823 | 0.653727 | Dnase1l3    |
| GO_BP_m3GO:003031melanocyt1/539     | 26/23843  | 0.44834  | 0.692823 | 0.653727 | Sox10       |



|                   |                           |        |           |          |          |          |             |
|-------------------|---------------------------|--------|-----------|----------|----------|----------|-------------|
| GO_BP_m3GO:003136 | N-terminal                | 1/539  | 26/23843  | 0.44834  | 0.692823 | 0.653727 | Naa25       |
| GO_BP_m3GO:003323 | regulation                | 1/539  | 26/23843  | 0.44834  | 0.692823 | 0.653727 | Gnl3l       |
| GO_BP_m3GO:004506 | thymic T cell             | 1/539  | 26/23843  | 0.44834  | 0.692823 | 0.653727 | Aire        |
| GO_BP_m3GO:004583 | positive regulation       | 1/539  | 26/23843  | 0.44834  | 0.692823 | 0.653727 | Exosc6      |
| GO_BP_m3GO:004646 | membrane                  | 1/539  | 26/23843  | 0.44834  | 0.692823 | 0.653727 | Enpp7       |
| GO_BP_m3GO:004852 | negative regulation       | 1/539  | 26/23843  | 0.44834  | 0.692823 | 0.653727 | Ucn         |
| GO_BP_m3GO:005071 | positive regulation       | 1/539  | 26/23843  | 0.44834  | 0.692823 | 0.653727 | Hk1         |
| GO_BP_m3GO:005092 | positive regulation       | 1/539  | 26/23843  | 0.44834  | 0.692823 | 0.653727 | S1pr1       |
| GO_BP_m3GO:006021 | camera-tyrosine           | 1/539  | 26/23843  | 0.44834  | 0.692823 | 0.653727 | lh          |
| GO_BP_m3GO:006131 | cell surface              | 1/539  | 26/23843  | 0.44834  | 0.692823 | 0.653727 | Bmp2        |
| GO_BP_m3GO:007148 | cellular response         | 1/539  | 26/23843  | 0.44834  | 0.692823 | 0.653727 | Bcl2l1      |
| GO_BP_m3GO:009007 | foam cell differentiation | 1/539  | 26/23843  | 0.44834  | 0.692823 | 0.653727 | Prkch       |
| GO_BP_m3GO:200031 | regulation                | 1/539  | 26/23843  | 0.44834  | 0.692823 | 0.653727 | Nlgn1       |
| GO_BP_m3GO:000018 | activation                | 3/539  | 109/23843 | 0.448572 | 0.692823 | 0.653727 | Bmp2/Grm    |
| GO_BP_m3GO:000995 | dorsal/ventral            | 3/539  | 109/23843 | 0.448572 | 0.692823 | 0.653727 | Axin2/Nkx6  |
| GO_BP_m3GO:003812 | ERBB signaling            | 3/539  | 109/23843 | 0.448572 | 0.692823 | 0.653727 | Areg/Pigr/l |
| GO_BP_m3GO:200013 | regulation                | 3/539  | 109/23843 | 0.448572 | 0.692823 | 0.653727 | Ccl5/Mir10  |
| GO_BP_m3GO:000617 | cAMP biosynthesis         | 2/539  | 67/23843  | 0.449246 | 0.692823 | 0.653727 | Avp/Rln3    |
| GO_BP_m3GO:000643 | tRNA modification         | 2/539  | 67/23843  | 0.449246 | 0.692823 | 0.653727 | Trmo/Rpus   |
| GO_BP_m3GO:003304 | regulation                | 2/539  | 67/23843  | 0.449246 | 0.692823 | 0.653727 | Mad2l1/Utk  |
| GO_BP_m3GO:004566 | positive regulation       | 2/539  | 67/23843  | 0.449246 | 0.692823 | 0.653727 | Bmp2/Tme    |
| GO_BP_m3GO:005114 | smooth muscle             | 2/539  | 67/23843  | 0.449246 | 0.692823 | 0.653727 | Foxf1/Hes1  |
| GO_BP_m3GO:009719 | execution                 | 2/539  | 67/23843  | 0.449246 | 0.692823 | 0.653727 | Bcl2l1/Dna  |
| GO_BP_m3GO:003133 | positive regulation       | 8/539  | 324/23843 | 0.45036  | 0.694292 | 0.655112 | Hnrnp/Lrrl  |
| GO_BP_m3GO:000823 | steroid metabolism        | 7/539  | 281/23843 | 0.451055 | 0.695113 | 0.655887 | Bmp2/Dhc    |
| GO_BP_m3GO:004232 | negative regulation       | 11/539 | 455/23843 | 0.453394 | 0.698468 | 0.659053 | 2610042L0   |
| GO_BP_m3GO:005126 | protein degradation       | 3/539  | 110/23843 | 0.454475 | 0.699175 | 0.65972  | Ckap2/Car   |
| GO_BP_m3GO:001604 | cell growth               | 12/539 | 499/23843 | 0.454884 | 0.699175 | 0.65972  | Avp/Cryaa   |
| GO_BP_m3GO:009723 | cellular response         | 4/539  | 153/23843 | 0.455885 | 0.699175 | 0.65972  | Ankzf1/Lrrl |
| GO_BP_m3GO:000238 | mucosal irritation        | 2/539  | 68/23843  | 0.456829 | 0.699175 | 0.65972  | Defa27/Pig  |
| GO_BP_m3GO:000663 | fatty acid biosynthesis   | 2/539  | 68/23843  | 0.456829 | 0.699175 | 0.65972  | Slc25a17/T  |
| GO_BP_m3GO:003023 | myofibril assembly        | 2/539  | 68/23843  | 0.456829 | 0.699175 | 0.65972  | Mybph/Tnr   |
| GO_BP_m3GO:004233 | regulation                | 2/539  | 68/23843  | 0.456829 | 0.699175 | 0.65972  | Lrrk2/Ptpn  |
| GO_BP_m3GO:004329 | leukocyte chemotaxis      | 2/539  | 68/23843  | 0.456829 | 0.699175 | 0.65972  | Abr/Foxf1   |
| GO_BP_m3GO:004557 | mast cell activation      | 2/539  | 68/23843  | 0.456829 | 0.699175 | 0.65972  | Foxf1/Ptpn  |
| GO_BP_m3GO:000193 | negative regulation       | 10/539 | 413/23843 | 0.457682 | 0.699175 | 0.65972  | 2610042L0   |
| GO_BP_m3GO:005085 | antigen recognition       | 7/539  | 283/23843 | 0.458361 | 0.699175 | 0.65972  | Btn1a1/Igh  |
| GO_BP_m3GO:190213 | regulation                | 7/539  | 283/23843 | 0.458361 | 0.699175 | 0.65972  | Ccl5/Cd46   |
| GO_BP_m3GO:000037 | RNA splicing              | 6/539  | 240/23843 | 0.459461 | 0.699175 | 0.65972  | Celf5/Ddx4  |
| GO_BP_m3GO:000039 | mRNA splicing             | 6/539  | 240/23843 | 0.459461 | 0.699175 | 0.65972  | Celf5/Ddx4  |
| GO_BP_m3GO:000749 | mesoderm                  | 3/539  | 111/23843 | 0.460351 | 0.699175 | 0.65972  | Foxc2/Foxf  |
| GO_BP_m3GO:000863 | intrinsic apoptosis       | 3/539  | 111/23843 | 0.460351 | 0.699175 | 0.65972  | Bcl2l1/Fnip |
| GO_BP_m3GO:007232 | monocarboxylic acid       | 3/539  | 111/23843 | 0.460351 | 0.699175 | 0.65972  | Slc25a17/S  |
| GO_BP_m3GO:190304 | meiotic cell cycle        | 5/539  | 197/23843 | 0.460365 | 0.699175 | 0.65972  | Ankle1/Ccc  |
| GO_BP_m3GO:003225 | methylation               | 8/539  | 327/23843 | 0.460561 | 0.699175 | 0.65972  | Trmo/Armt   |
| GO_BP_m3GO:000333 | metanephros               | 1/539  | 27/23843  | 0.460824 | 0.699175 | 0.65972  | Hes1        |
| GO_BP_m3GO:000651 | protein quality control   | 1/539  | 27/23843  | 0.460824 | 0.699175 | 0.65972  | Ankzf1      |
| GO_BP_m3GO:000692 | cellular core             | 1/539  | 27/23843  | 0.460824 | 0.699175 | 0.65972  | Dnase1l3    |

|                   |               |        |           |          |          |          |             |
|-------------------|---------------|--------|-----------|----------|----------|----------|-------------|
| GO_BP_m3GO:001073 | regulation    | 1/539  | 27/23843  | 0.460824 | 0.699175 | 0.65972  | Lrrk2       |
| GO_BP_m3GO:002153 | cell differer | 1/539  | 27/23843  | 0.460824 | 0.699175 | 0.65972  | Atxn2       |
| GO_BP_m3GO:003048 | tRNA meth     | 1/539  | 27/23843  | 0.460824 | 0.699175 | 0.65972  | Trmo        |
| GO_BP_m3GO:003163 | plasminog     | 1/539  | 27/23843  | 0.460824 | 0.699175 | 0.65972  | Dhcr24      |
| GO_BP_m3GO:003598 | endoderm      | 1/539  | 27/23843  | 0.460824 | 0.699175 | 0.65972  | Ctr9        |
| GO_BP_m3GO:004303 | positive re   | 1/539  | 27/23843  | 0.460824 | 0.699175 | 0.65972  | Lrrk2       |
| GO_BP_m3GO:004874 | smooth m      | 1/539  | 27/23843  | 0.460824 | 0.699175 | 0.65972  | lhh         |
| GO_BP_m3GO:005071 | positive re   | 1/539  | 27/23843  | 0.460824 | 0.699175 | 0.65972  | Hk1         |
| GO_BP_m3GO:005092 | regulation    | 1/539  | 27/23843  | 0.460824 | 0.699175 | 0.65972  | S1pr1       |
| GO_BP_m3GO:005115 | regulation    | 1/539  | 27/23843  | 0.460824 | 0.699175 | 0.65972  | Foxf1       |
| GO_BP_m3GO:006014 | positive re   | 1/539  | 27/23843  | 0.460824 | 0.699175 | 0.65972  | Myod1       |
| GO_BP_m3GO:006071 | labyrinthin   | 1/539  | 27/23843  | 0.460824 | 0.699175 | 0.65972  | Esx1        |
| GO_BP_m3GO:007019 | protein loc   | 1/539  | 27/23843  | 0.460824 | 0.699175 | 0.65972  | Gnl3l       |
| GO_BP_m3GO:007097 | protein K1    | 1/539  | 27/23843  | 0.460824 | 0.699175 | 0.65972  | Ube2c       |
| GO_BP_m3GO:007136 | cellular res  | 1/539  | 27/23843  | 0.460824 | 0.699175 | 0.65972  | Mir362      |
| GO_BP_m3GO:007163 | regulation    | 1/539  | 27/23843  | 0.460824 | 0.699175 | 0.65972  | Cd46        |
| GO_BP_m3GO:007170 | membrane      | 1/539  | 27/23843  | 0.460824 | 0.699175 | 0.65972  | Nlgn1       |
| GO_BP_m3GO:009734 | mitochond     | 1/539  | 27/23843  | 0.460824 | 0.699175 | 0.65972  | Ier3        |
| GO_BP_m3GO:190011 | regulation    | 1/539  | 27/23843  | 0.460824 | 0.699175 | 0.65972  | Bcl2l1      |
| GO_BP_m3GO:190223 | regulation    | 1/539  | 27/23843  | 0.460824 | 0.699175 | 0.65972  | Lrrk2       |
| GO_BP_m3GO:004865 | smooth m      | 4/539  | 154/23843 | 0.460853 | 0.699175 | 0.65972  | Ccl5/Hpgd   |
| GO_BP_m3GO:000037 | RNA splicir   | 6/539  | 241/23843 | 0.463421 | 0.70225  | 0.662622 | Celf5/Ddx4  |
| GO_BP_m3GO:003367 | negative re   | 6/539  | 241/23843 | 0.463421 | 0.70225  | 0.662622 | Dusp26/Lrr  |
| GO_BP_m3GO:000155 | regulation    | 10/539 | 415/23843 | 0.463718 | 0.70225  | 0.662622 | Avp/Cryaa   |
| GO_BP_m3GO:000027 | polysaccha    | 2/539  | 69/23843  | 0.464351 | 0.70225  | 0.662622 | B3gnt6/Phl  |
| GO_BP_m3GO:000225 | organ or ti   | 2/539  | 69/23843  | 0.464351 | 0.70225  | 0.662622 | Defa27/Pig  |
| GO_BP_m3GO:004213 | negative re   | 2/539  | 69/23843  | 0.464351 | 0.70225  | 0.662622 | Btn1a1/lhh  |
| GO_BP_m3GO:004864 | animal org    | 2/539  | 69/23843  | 0.464351 | 0.70225  | 0.662622 | Axin2/Hes1  |
| GO_BP_m3GO:006019 | regulation    | 2/539  | 69/23843  | 0.464351 | 0.70225  | 0.662622 | Ccl5/Prkcz  |
| GO_BP_m3GO:190199 | positive re   | 2/539  | 69/23843  | 0.464351 | 0.70225  | 0.662622 | Neurog1/L   |
| GO_BP_m3GO:190370 | positive re   | 5/539  | 198/23843 | 0.464739 | 0.702588 | 0.66294  | Ccl5/Cd46/  |
| GO_BP_m3GO:000315 | endotheliu    | 3/539  | 112/23843 | 0.4662   | 0.703559 | 0.663857 | Foxc2/Rhol  |
| GO_BP_m3GO:000663 | icosanoid r   | 3/539  | 112/23843 | 0.4662   | 0.703559 | 0.663857 | Avp/Cyp2c   |
| GO_BP_m3GO:000803 | tRNA proc     | 3/539  | 112/23843 | 0.4662   | 0.703559 | 0.663857 | Trmo/Pus7   |
| GO_BP_m3GO:004616 | alcohol bio   | 3/539  | 112/23843 | 0.4662   | 0.703559 | 0.663857 | Dhcr24/lpp  |
| GO_BP_m3GO:190305 | positive re   | 3/539  | 112/23843 | 0.4662   | 0.703559 | 0.663857 | Lrrk2/Rnf14 |
| GO_BP_m3GO:004873 | cardiac mu    | 6/539  | 242/23843 | 0.467373 | 0.703723 | 0.664012 | Bmp2/Ctdp   |
| GO_BP_m3GO:003052 | intracellula  | 5/539  | 199/23843 | 0.469101 | 0.703723 | 0.664012 | Ghrhr/Kdm   |
| GO_BP_m3GO:200002 | regulation    | 5/539  | 199/23843 | 0.469101 | 0.703723 | 0.664012 | Bmp2/Foxc   |
| GO_BP_m3GO:000728 | spermatid     | 4/539  | 156/23843 | 0.470742 | 0.703723 | 0.664012 | Catsper4/C  |
| GO_BP_m3GO:004677 | protein aut   | 6/539  | 243/23843 | 0.471318 | 0.703723 | 0.664012 | Hck/Hk1/Li  |
| GO_BP_m3GO:000173 | morphoge      | 2/539  | 70/23843  | 0.471812 | 0.703723 | 0.664012 | Crb3/Foxf1  |
| GO_BP_m3GO:000609 | glycolytic    | 2/539  | 70/23843  | 0.471812 | 0.703723 | 0.664012 | Hk1/Ier3    |
| GO_BP_m3GO:004211 | macropha      | 2/539  | 70/23843  | 0.471812 | 0.703723 | 0.664012 | Lrrk2/Tff2  |
| GO_BP_m3GO:004545 | bone resor    | 2/539  | 70/23843  | 0.471812 | 0.703723 | 0.664012 | lhh/S1pr1   |
| GO_BP_m3GO:004874 | muscle fib    | 2/539  | 70/23843  | 0.471812 | 0.703723 | 0.664012 | Flnc/Myod   |
| GO_BP_m3GO:190188 | negative re   | 2/539  | 70/23843  | 0.471812 | 0.703723 | 0.664012 | Ckap2/Car   |
| GO_BP_m3GO:200024 | positive re   | 2/539  | 70/23843  | 0.471812 | 0.703723 | 0.664012 | Fam170b/C   |

|                                     |           |          |          |          |             |
|-------------------------------------|-----------|----------|----------|----------|-------------|
| GO_BP_m3GO:000189embryonic 3/539    | 113/23843 | 0.472021 | 0.703723 | 0.664012 | Esx1/Hes1/  |
| GO_BP_m3GO:003110microtubul 3/539   | 113/23843 | 0.472021 | 0.703723 | 0.664012 | Ckap2/Maf   |
| GO_BP_m3GO:005085T cell recep 3/539 | 113/23843 | 0.472021 | 0.703723 | 0.664012 | Btn1a1/Car  |
| GO_BP_m3GO:000183blastocyst 1/539   | 28/23843  | 0.473027 | 0.703723 | 0.664012 | Ctr9        |
| GO_BP_m3GO:000194lymph vess 1/539   | 28/23843  | 0.473027 | 0.703723 | 0.664012 | Foxc2       |
| GO_BP_m3GO:000692substrate-c 1/539  | 28/23843  | 0.473027 | 0.703723 | 0.664012 | Fmn1        |
| GO_BP_m3GO:000753sex determ 1/539   | 28/23843  | 0.473027 | 0.703723 | 0.664012 | Tcf21       |
| GO_BP_m3GO:000930rRNA trans 1/539   | 28/23843  | 0.473027 | 0.703723 | 0.664012 | Ippk        |
| GO_BP_m3GO:001075regulation 1/539   | 28/23843  | 0.473027 | 0.703723 | 0.664012 | Ccl5        |
| GO_BP_m3GO:001624negative re 1/539  | 28/23843  | 0.473027 | 0.703723 | 0.664012 | Lrrk2       |
| GO_BP_m3GO:002151spinal cord 1/539  | 28/23843  | 0.473027 | 0.703723 | 0.664012 | Nkx6-1      |
| GO_BP_m3GO:002187forebrain r 1/539  | 28/23843  | 0.473027 | 0.703723 | 0.664012 | Bmp2        |
| GO_BP_m3GO:003129replication 1/539  | 28/23843  | 0.473027 | 0.703723 | 0.664012 | Mms22l      |
| GO_BP_m3GO:003267regulation 1/539   | 28/23843  | 0.473027 | 0.703723 | 0.664012 | Prkc        |
| GO_BP_m3GO:003356regulation 1/539   | 28/23843  | 0.473027 | 0.703723 | 0.664012 | Cela2a      |
| GO_BP_m3GO:004203negative re 1/539  | 28/23843  | 0.473027 | 0.703723 | 0.664012 | Trib2       |
| GO_BP_m3GO:004400modificatic 1/539  | 28/23843  | 0.473027 | 0.703723 | 0.664012 | Bcl2l1      |
| GO_BP_m3GO:004455secondary 1/539    | 28/23843  | 0.473027 | 0.703723 | 0.664012 | Trpc1       |
| GO_BP_m3GO:004567negative re 1/539  | 28/23843  | 0.473027 | 0.703723 | 0.664012 | Tmem178     |
| GO_BP_m3GO:005135negative re 1/539  | 28/23843  | 0.473027 | 0.703723 | 0.664012 | Lrrk2       |
| GO_BP_m3GO:006003pericardiur 1/539  | 28/23843  | 0.473027 | 0.703723 | 0.664012 | Bmp2        |
| GO_BP_m3GO:006011auditory re 1/539  | 28/23843  | 0.473027 | 0.703723 | 0.664012 | Whrn        |
| GO_BP_m3GO:006044branching 1/539    | 28/23843  | 0.473027 | 0.703723 | 0.664012 | Areg        |
| GO_BP_m3GO:007160transformir 1/539  | 28/23843  | 0.473027 | 0.703723 | 0.664012 | Cd46        |
| GO_BP_m3GO:007259establishm 1/539   | 28/23843  | 0.473027 | 0.703723 | 0.664012 | Pmm1        |
| GO_BP_m3GO:190204negative re 1/539  | 28/23843  | 0.473027 | 0.703723 | 0.664012 | Bcl2l1      |
| GO_BP_m3GO:190217regulation 1/539   | 28/23843  | 0.473027 | 0.703723 | 0.664012 | Bag5        |
| GO_BP_m3GO:190274positive re 1/539  | 28/23843  | 0.473027 | 0.703723 | 0.664012 | Carmil2     |
| GO_BP_m3GO:200019regulation 1/539   | 28/23843  | 0.473027 | 0.703723 | 0.664012 | Oxt         |
| GO_BP_m3GO:000694striated m 4/539   | 157/23843 | 0.475661 | 0.707398 | 0.667479 | Mybph/Tnr   |
| GO_BP_m3GO:001993second-m 8/539     | 332/23843 | 0.477478 | 0.708992 | 0.668984 | Adm2/Ghrl   |
| GO_BP_m3GO:001095negative re 5/539  | 201/23843 | 0.477793 | 0.708992 | 0.668984 | 9230104L0   |
| GO_BP_m3GO:003157DNA integri 3/539  | 114/23843 | 0.477812 | 0.708992 | 0.668984 | Fanci/Ier3/ |
| GO_BP_m3GO:004217negative re 3/539  | 114/23843 | 0.477812 | 0.708992 | 0.668984 | Bag5/Grin2  |
| GO_BP_m3GO:005115regulation 3/539   | 114/23843 | 0.477812 | 0.708992 | 0.668984 | Bmp2/Ctdp   |
| GO_BP_m3GO:005073regulation 6/539   | 245/23843 | 0.479183 | 0.708992 | 0.668984 | Areg/Ccl5/  |
| GO_BP_m3GO:000220somatic div 2/539  | 71/23843  | 0.47921  | 0.708992 | 0.668984 | Exosc6/Mir  |
| GO_BP_m3GO:000675ATP gener 2/539    | 71/23843  | 0.47921  | 0.708992 | 0.668984 | Hk1/Ier3    |
| GO_BP_m3GO:001974secondary 2/539    | 71/23843  | 0.47921  | 0.708992 | 0.668984 | Trpc1/Ugt1  |
| GO_BP_m3GO:003463cellular car 2/539 | 71/23843  | 0.47921  | 0.708992 | 0.668984 | B3gnt6/Phl  |
| GO_BP_m3GO:004273embryonic 2/539    | 71/23843  | 0.47921  | 0.708992 | 0.668984 | Ihh/Twist1  |
| GO_BP_m3GO:004362response tr 2/539  | 71/23843  | 0.47921  | 0.708992 | 0.668984 | Ghrhr/Tgfb  |
| GO_BP_m3GO:005188regulation 2/539   | 71/23843  | 0.47921  | 0.708992 | 0.668984 | Bcl2l1/Lrrk |
| GO_BP_m3GO:007238organelle t 2/539  | 71/23843  | 0.47921  | 0.708992 | 0.668984 | Ap3s1/Prkc  |
| GO_BP_m3GO:190331positive re 2/539  | 71/23843  | 0.47921  | 0.708992 | 0.668984 | Hnrnpr/Na   |
| GO_BP_m3GO:004533cellular res 4/539 | 158/23843 | 0.480563 | 0.710506 | 0.670412 | Dlat/Dld/Si |
| GO_BP_m3GO:005110negative re 4/539  | 158/23843 | 0.480563 | 0.710506 | 0.670412 | Gnl3l/Hes1  |
| GO_BP_m3GO:004340regulation 7/539   | 290/23843 | 0.483757 | 0.710986 | 0.670864 | Bmp2/Grm    |

|                   |               |        |           |          |          |          |              |
|-------------------|---------------|--------|-----------|----------|----------|----------|--------------|
| GO_BP_m3GO:002261 | ribonucleo    | 10/539 | 422/23843 | 0.484751 | 0.710986 | 0.670864 | Atxn2/Dis3   |
| GO_BP_m3GO:000047 | maturation    | 1/539  | 29/23843  | 0.484954 | 0.710986 | 0.670864 | Nsa2         |
| GO_BP_m3GO:000177 | microglial c  | 1/539  | 29/23843  | 0.484954 | 0.710986 | 0.670864 | Lrrk2        |
| GO_BP_m3GO:000209 | positive re   | 1/539  | 29/23843  | 0.484954 | 0.710986 | 0.670864 | Ptpn5        |
| GO_BP_m3GO:000269 | regulation    | 1/539  | 29/23843  | 0.484954 | 0.710986 | 0.670864 | Abr          |
| GO_BP_m3GO:00033C | type B pan    | 1/539  | 29/23843  | 0.484954 | 0.710986 | 0.670864 | Nkx6-1       |
| GO_BP_m3GO:000609 | tricarboxyli  | 1/539  | 29/23843  | 0.484954 | 0.710986 | 0.670864 | Dlat         |
| GO_BP_m3GO:00069C | vesicle targ  | 1/539  | 29/23843  | 0.484954 | 0.710986 | 0.670864 | Nlgn1        |
| GO_BP_m3GO:00108C | positive re   | 1/539  | 29/23843  | 0.484954 | 0.710986 | 0.670864 | Trim6        |
| GO_BP_m3GO:001092 | positive re   | 1/539  | 29/23843  | 0.484954 | 0.710986 | 0.670864 | Bmp2         |
| GO_BP_m3GO:003249 | negative re   | 1/539  | 29/23843  | 0.484954 | 0.710986 | 0.670864 | Bag5         |
| GO_BP_m3GO:003279 | positive re   | 1/539  | 29/23843  | 0.484954 | 0.710986 | 0.670864 | Ctr9         |
| GO_BP_m3GO:003299 | inositol ph   | 1/539  | 29/23843  | 0.484954 | 0.710986 | 0.670864 | Ippk         |
| GO_BP_m3GO:003411 | regulation    | 1/539  | 29/23843  | 0.484954 | 0.710986 | 0.670864 | Ccl5         |
| GO_BP_m3GO:003462 | cellular pr   | 1/539  | 29/23843  | 0.484954 | 0.710986 | 0.670864 | Exoc1        |
| GO_BP_m3GO:003589 | vascular sn   | 1/539  | 29/23843  | 0.484954 | 0.710986 | 0.670864 | Hes1         |
| GO_BP_m3GO:004519 | regulation    | 1/539  | 29/23843  | 0.484954 | 0.710986 | 0.670864 | Ghrhr        |
| GO_BP_m3GO:004567 | positive re   | 1/539  | 29/23843  | 0.484954 | 0.710986 | 0.670864 | Ccl5         |
| GO_BP_m3GO:190179 | negative re   | 1/539  | 29/23843  | 0.484954 | 0.710986 | 0.670864 | Twist1       |
| GO_BP_m3GO:200051 | positive re   | 1/539  | 29/23843  | 0.484954 | 0.710986 | 0.670864 | Prkcz        |
| GO_BP_m3GO:000709 | regulation    | 4/539  | 159/23843 | 0.485447 | 0.710986 | 0.670864 | Mad211/Ne    |
| GO_BP_m3GO:000864 | carbohydr     | 4/539  | 159/23843 | 0.485447 | 0.710986 | 0.670864 | Gip/Prkcz/!  |
| GO_BP_m3GO:003529 | regulation    | 4/539  | 159/23843 | 0.485447 | 0.710986 | 0.670864 | Avp/Mkks/    |
| GO_BP_m3GO:009774 | regulation    | 4/539  | 159/23843 | 0.485447 | 0.710986 | 0.670864 | Avp/Mkks/    |
| GO_BP_m3GO:001489 | striated m    | 2/539  | 72/23843  | 0.486543 | 0.710986 | 0.670864 | Foxc2/Tgft   |
| GO_BP_m3GO:00303C | cholesterol   | 2/539  | 72/23843  | 0.486543 | 0.710986 | 0.670864 | Ptch1/Stx1.  |
| GO_BP_m3GO:00308C | regulation    | 2/539  | 72/23843  | 0.486543 | 0.710986 | 0.670864 | Avp/Rln3     |
| GO_BP_m3GO:004229 | ribosome      | 2/539  | 72/23843  | 0.486543 | 0.710986 | 0.670864 | Rpl6l/Nip7   |
| GO_BP_m3GO:004427 | sulfur com    | 2/539  | 72/23843  | 0.486543 | 0.710986 | 0.670864 | Dlat/Dld     |
| GO_BP_m3GO:005069 | regulation    | 2/539  | 72/23843  | 0.486543 | 0.710986 | 0.670864 | Ccl5/Trim6   |
| GO_BP_m3GO:005189 | modificati    | 2/539  | 72/23843  | 0.486543 | 0.710986 | 0.670864 | Ccl5/Ctdp1   |
| GO_BP_m3GO:007019 | chromosom     | 2/539  | 72/23843  | 0.486543 | 0.710986 | 0.670864 | Ankle1/Ccc   |
| GO_BP_m3GO:19032C | regulation    | 2/539  | 72/23843  | 0.486543 | 0.710986 | 0.670864 | Bag5/Lrrk2   |
| GO_BP_m3GO:000762 | locomotory    | 6/539  | 247/23843 | 0.487013 | 0.710986 | 0.670864 | Avp/Chrna.   |
| GO_BP_m3GO:001599 | energy der    | 6/539  | 247/23843 | 0.487013 | 0.710986 | 0.670864 | Dlat/Dld/Pl  |
| GO_BP_m3GO:006054 | respiratory   | 6/539  | 247/23843 | 0.487013 | 0.710986 | 0.670864 | Foxf1/Hes1   |
| GO_BP_m3GO:004579 | positive re   | 9/539  | 379/23843 | 0.487685 | 0.711726 | 0.671563 | Ccl5/Cd46/   |
| GO_BP_m3GO:000712 | meiosis I     | 3/539  | 116/23843 | 0.489306 | 0.712879 | 0.672651 | Ankle1/Ccc   |
| GO_BP_m3GO:001059 | regulation    | 3/539  | 116/23843 | 0.489306 | 0.712879 | 0.672651 | Avp/Bmp2,    |
| GO_BP_m3GO:001569 | ammonium      | 3/539  | 116/23843 | 0.489306 | 0.712879 | 0.672651 | Chrna4/Gp    |
| GO_BP_m3GO:001802 | peptidyl-ly   | 3/539  | 116/23843 | 0.489306 | 0.712879 | 0.672651 | Ctr9/Kdm4    |
| GO_BP_m3GO:00421C | B cell prolif | 3/539  | 116/23843 | 0.489306 | 0.712879 | 0.672651 | Gm13287/l    |
| GO_BP_m3GO:004573 | positive re   | 5/539  | 204/23843 | 0.490741 | 0.714728 | 0.674395 | Ier3/Lrrk2/l |
| GO_BP_m3GO:19029C | regulation    | 8/539  | 336/23843 | 0.49092  | 0.714746 | 0.674412 | Ckap2/Mkl    |
| GO_BP_m3GO:001591 | sterol trans  | 2/539  | 73/23843  | 0.493813 | 0.716234 | 0.675816 | Ptch1/Stx1.  |
| GO_BP_m3GO:006042 | regulation    | 2/539  | 73/23843  | 0.493813 | 0.716234 | 0.675816 | Ctdp1/Tgft   |
| GO_BP_m3GO:006151 | myeloid ce    | 2/539  | 73/23843  | 0.493813 | 0.716234 | 0.675816 | Klf2/L3mbt   |
| GO_BP_m3GO:190459 | regulation    | 2/539  | 73/23843  | 0.493813 | 0.716234 | 0.675816 | Lrrk2/Ptpn!  |

|                               |        |           |          |          |          |              |
|-------------------------------|--------|-----------|----------|----------|----------|--------------|
| GO_BP_m3GO:000244lymphocyte   | 9/539  | 381/23843 | 0.493987 | 0.716234 | 0.675816 | Aire/Cd46/   |
| GO_BP_m3GO:005086regulation   | 7/539  | 293/23843 | 0.494542 | 0.716234 | 0.675816 | Btn1a1/Ccl   |
| GO_BP_m3GO:003164regulation   | 6/539  | 249/23843 | 0.494805 | 0.716234 | 0.675816 | Bmp2/Gnl3    |
| GO_BP_m3GO:000675ATP biosyn   | 3/539  | 117/23843 | 0.495006 | 0.716234 | 0.675816 | Bcl2l1/Hkl   |
| GO_BP_m3GO:000761learning     | 4/539  | 161/23843 | 0.495159 | 0.716234 | 0.675816 | Grm4/Sgk1    |
| GO_BP_m3GO:000153cilium or fl | 1/539  | 30/23843  | 0.496611 | 0.716234 | 0.675816 | Mkks         |
| GO_BP_m3GO:000196startle resp | 1/539  | 30/23843  | 0.496611 | 0.716234 | 0.675816 | Ucn          |
| GO_BP_m3GO:000282regulation   | 1/539  | 30/23843  | 0.496611 | 0.716234 | 0.675816 | Prkcz        |
| GO_BP_m3GO:000290regulation   | 1/539  | 30/23843  | 0.496611 | 0.716234 | 0.675816 | Mir106b      |
| GO_BP_m3GO:002190dorsal/vent  | 1/539  | 30/23843  | 0.496611 | 0.716234 | 0.675816 | Ptch1        |
| GO_BP_m3GO:003223negative re  | 1/539  | 30/23843  | 0.496611 | 0.716234 | 0.675816 | S1pr1        |
| GO_BP_m3GO:003532hippo sign   | 1/539  | 30/23843  | 0.496611 | 0.716234 | 0.675816 | Nf2          |
| GO_BP_m3GO:004248regulation   | 1/539  | 30/23843  | 0.496611 | 0.716234 | 0.675816 | Bmp2         |
| GO_BP_m3GO:004603GTP metab    | 1/539  | 30/23843  | 0.496611 | 0.716234 | 0.675816 | Lrrk2        |
| GO_BP_m3GO:004801neurotropt   | 1/539  | 30/23843  | 0.496611 | 0.716234 | 0.675816 | Ptprf        |
| GO_BP_m3GO:004867regulation   | 1/539  | 30/23843  | 0.496611 | 0.716234 | 0.675816 | Ptprf        |
| GO_BP_m3GO:005080circadian sl | 1/539  | 30/23843  | 0.496611 | 0.716234 | 0.675816 | Ghrhr        |
| GO_BP_m3GO:005156regulation   | 1/539  | 30/23843  | 0.496611 | 0.716234 | 0.675816 | Ctr9         |
| GO_BP_m3GO:006028cilium-dep   | 1/539  | 30/23843  | 0.496611 | 0.716234 | 0.675816 | Mkks         |
| GO_BP_m3GO:007153protein loc  | 1/539  | 30/23843  | 0.496611 | 0.716234 | 0.675816 | Cep131       |
| GO_BP_m3GO:190007positive re  | 1/539  | 30/23843  | 0.496611 | 0.716234 | 0.675816 | Prkcz        |
| GO_BP_m3GO:190211positive re  | 1/539  | 30/23843  | 0.496611 | 0.716234 | 0.675816 | Ier3         |
| GO_BP_m3GO:190552regulation   | 1/539  | 30/23843  | 0.496611 | 0.716234 | 0.675816 | Ccl5         |
| GO_BP_m3GO:200014positive re  | 1/539  | 30/23843  | 0.496611 | 0.716234 | 0.675816 | Twist1       |
| GO_BP_m3GO:004352regulation   | 6/539  | 250/23843 | 0.498686 | 0.718744 | 0.678185 | Bcl2l1/Crlf1 |
| GO_BP_m3GO:011005regulation   | 6/539  | 250/23843 | 0.498686 | 0.718744 | 0.678185 | Mkks/Nf2l    |
| GO_BP_m3GO:200123regulation   | 4/539  | 162/23843 | 0.499986 | 0.720169 | 0.679529 | Bcl2l1/Pdia  |
| GO_BP_m3GO:000666sphingolipi  | 3/539  | 118/23843 | 0.500674 | 0.720169 | 0.679529 | Elovl2/Enp   |
| GO_BP_m3GO:006004cardiac mu   | 3/539  | 118/23843 | 0.500674 | 0.720169 | 0.679529 | Tnni2/Tnnt   |
| GO_BP_m3GO:006198meiosis I c  | 3/539  | 118/23843 | 0.500674 | 0.720169 | 0.679529 | Ankle1/Ccc   |
| GO_BP_m3GO:000906aerobic res  | 2/539  | 74/23843  | 0.501016 | 0.720169 | 0.679529 | Dlat/Ucn     |
| GO_BP_m3GO:003014sphingolipi  | 2/539  | 74/23843  | 0.501016 | 0.720169 | 0.679529 | Elovl2/St6c  |
| GO_BP_m3GO:004286pyruvate bi  | 2/539  | 74/23843  | 0.501016 | 0.720169 | 0.679529 | Hkl/Ier3     |
| GO_BP_m3GO:004678microtubul   | 2/539  | 74/23843  | 0.501016 | 0.720169 | 0.679529 | Map7d3/Sq    |
| GO_BP_m3GO:004325regulation   | 10/539 | 429/23843 | 0.505595 | 0.724127 | 0.683264 | Atat1/Atxn   |
| GO_BP_m3GO:001406phosphatic   | 3/539  | 119/23843 | 0.50631  | 0.724127 | 0.683264 | Ccl5/Prr5/T  |
| GO_BP_m3GO:004682regulation   | 3/539  | 119/23843 | 0.50631  | 0.724127 | 0.683264 | Ier3/Lrrk2/I |
| GO_BP_m3GO:005192positive re  | 3/539  | 119/23843 | 0.50631  | 0.724127 | 0.683264 | Ccl5/Trpc1   |
| GO_BP_m3GO:000989positive re  | 9/539  | 385/23843 | 0.506526 | 0.724127 | 0.683264 | Hnrnpr/Ier   |
| GO_BP_m3GO:005109regulation   | 9/539  | 385/23843 | 0.506526 | 0.724127 | 0.683264 | Hck/Map3f    |
| GO_BP_m3GO:000702negative re  | 1/539  | 31/23843  | 0.508005 | 0.724127 | 0.683264 | Ckap2        |
| GO_BP_m3GO:001056regulation   | 1/539  | 31/23843  | 0.508005 | 0.724127 | 0.683264 | D330045A;    |
| GO_BP_m3GO:001827protein N-   | 1/539  | 31/23843  | 0.508005 | 0.724127 | 0.683264 | St6galnac5   |
| GO_BP_m3GO:003274positive re  | 1/539  | 31/23843  | 0.508005 | 0.724127 | 0.683264 | Carmil2      |
| GO_BP_m3GO:003308regulation   | 1/539  | 31/23843  | 0.508005 | 0.724127 | 0.683264 | Ihh          |
| GO_BP_m3GO:004324positive re  | 1/539  | 31/23843  | 0.508005 | 0.724127 | 0.683264 | Carmil2      |
| GO_BP_m3GO:004327anoikis      | 1/539  | 31/23843  | 0.508005 | 0.724127 | 0.683264 | Bcl2l1       |
| GO_BP_m3GO:004351regulation   | 1/539  | 31/23843  | 0.508005 | 0.724127 | 0.683264 | Twist1       |

|                                    |           |          |          |          |             |
|------------------------------------|-----------|----------|----------|----------|-------------|
| GO_BP_m3GO:004433cell-cell ad1/539 | 31/23843  | 0.508005 | 0.724127 | 0.683264 | Cdh26       |
| GO_BP_m3GO:004561regulation 1/539  | 31/23843  | 0.508005 | 0.724127 | 0.683264 | Prkch       |
| GO_BP_m3GO:004853lymph nod 1/539   | 31/23843  | 0.508005 | 0.724127 | 0.683264 | Nkx2-3      |
| GO_BP_m3GO:005070regulation 1/539  | 31/23843  | 0.508005 | 0.724127 | 0.683264 | Hk1         |
| GO_BP_m3GO:005111vitamin tra1/539  | 31/23843  | 0.508005 | 0.724127 | 0.683264 | Slc19a1     |
| GO_BP_m3GO:006097coronary v1/539   | 31/23843  | 0.508005 | 0.724127 | 0.683264 | Tgfbr1      |
| GO_BP_m3GO:190547negative re1/539  | 31/23843  | 0.508005 | 0.724127 | 0.683264 | Bcl2l1      |
| GO_BP_m3GO:190550protein loc 1/539 | 31/23843  | 0.508005 | 0.724127 | 0.683264 | Cep131      |
| GO_BP_m3GO:200040positive re1/539  | 31/23843  | 0.508005 | 0.724127 | 0.683264 | Ccl5        |
| GO_BP_m3GO:001922regulation 2/539  | 75/23843  | 0.508153 | 0.724127 | 0.683264 | Avp/Tacr1   |
| GO_BP_m3GO:009775positive re2/539  | 75/23843  | 0.508153 | 0.724127 | 0.683264 | Mkks/Ucn    |
| GO_BP_m3GO:190188regulation 2/539  | 75/23843  | 0.508153 | 0.724127 | 0.683264 | Gpm6b/Prf   |
| GO_BP_m3GO:001604lipid catab7/539  | 297/23843 | 0.508812 | 0.724825 | 0.683923 | Ces1b/Enp   |
| GO_BP_m3GO:003530regulation 4/539  | 164/23843 | 0.509579 | 0.725677 | 0.684727 | Bmp2/Dus1   |
| GO_BP_m3GO:190190regulation 6/539  | 253/23843 | 0.510268 | 0.726417 | 0.685425 | Fanci/Ier3/ |
| GO_BP_m3GO:000600generation 8/539  | 342/23843 | 0.510898 | 0.727073 | 0.686044 | Dlat/Dld/H  |
| GO_BP_m3GO:001092regulation 3/539  | 120/23843 | 0.511913 | 0.728235 | 0.687141 | Bmp2/Gpa    |
| GO_BP_m3GO:000840gonad dev5/539    | 209/23843 | 0.512054 | 0.728235 | 0.687141 | Bcl2l1/Ptpr |
| GO_BP_m3GO:005192regulation 6/539  | 254/23843 | 0.514106 | 0.730096 | 0.688896 | Ccl5/Hes1/  |
| GO_BP_m3GO:006056developme6/539    | 254/23843 | 0.514106 | 0.730096 | 0.688896 | Areg/Nkx6   |
| GO_BP_m3GO:006113regulation 4/539  | 165/23843 | 0.514344 | 0.730096 | 0.688896 | Bag5/Lrrk2  |
| GO_BP_m3GO:000597glycogen n2/539   | 76/23843  | 0.515224 | 0.730096 | 0.688896 | Phkg2/Ppp   |
| GO_BP_m3GO:000607cellular glu2/539 | 76/23843  | 0.515224 | 0.730096 | 0.688896 | Phkg2/Ppp   |
| GO_BP_m3GO:002187forebrain n2/539  | 76/23843  | 0.515224 | 0.730096 | 0.688896 | Atf5/Hes1   |
| GO_BP_m3GO:004404glucan met2/539   | 76/23843  | 0.515224 | 0.730096 | 0.688896 | Phkg2/Ppp   |
| GO_BP_m3GO:001605organic aci5/539  | 210/23843 | 0.516273 | 0.730096 | 0.688896 | Gcsh/Slc25  |
| GO_BP_m3GO:003007insulin secr5/539 | 210/23843 | 0.516273 | 0.730096 | 0.688896 | Ccl5/Gip/N  |
| GO_BP_m3GO:004630carboxylic i5/539 | 210/23843 | 0.516273 | 0.730096 | 0.688896 | Gcsh/Slc25  |
| GO_BP_m3GO:190161organic hyc5/539  | 210/23843 | 0.516273 | 0.730096 | 0.688896 | Bmp2/Dhc    |
| GO_BP_m3GO:000260negative re3/539  | 121/23843 | 0.517482 | 0.730096 | 0.688896 | Abr/Cd46/I  |
| GO_BP_m3GO:000327cardiac sep3/539  | 121/23843 | 0.517482 | 0.730096 | 0.688896 | Hes1/Mir19  |
| GO_BP_m3GO:200024regulation 4/539  | 166/23843 | 0.519088 | 0.730096 | 0.688896 | Adam24/Fc   |
| GO_BP_m3GO:000268negative re1/539  | 32/23843  | 0.519142 | 0.730096 | 0.688896 | Abr         |
| GO_BP_m3GO:000301respiratory 1/539 | 32/23843  | 0.519142 | 0.730096 | 0.688896 | Nlgn1       |
| GO_BP_m3GO:000320physiologic1/539  | 32/23843  | 0.519142 | 0.730096 | 0.688896 | Ctdp1       |
| GO_BP_m3GO:000330physiologic1/539  | 32/23843  | 0.519142 | 0.730096 | 0.688896 | Ctdp1       |
| GO_BP_m3GO:000635regulation 1/539  | 32/23843  | 0.519142 | 0.730096 | 0.688896 | Ippk        |
| GO_BP_m3GO:000926deoxyribor1/539   | 32/23843  | 0.519142 | 0.730096 | 0.688896 | Rrm2        |
| GO_BP_m3GO:001700cytochrom1/539    | 32/23843  | 0.519142 | 0.730096 | 0.688896 | Bcs1l       |
| GO_BP_m3GO:001810peptidyl-a1/539   | 32/23843  | 0.519142 | 0.730096 | 0.688896 | St6galnac5  |
| GO_BP_m3GO:001937epoxygena1/539    | 32/23843  | 0.519142 | 0.730096 | 0.688896 | Cyp2c38     |
| GO_BP_m3GO:002261extracellula1/539 | 32/23843  | 0.519142 | 0.730096 | 0.688896 | Carmil2     |
| GO_BP_m3GO:003350mammary 1/539     | 32/23843  | 0.519142 | 0.730096 | 0.688896 | Areg        |
| GO_BP_m3GO:004574positive re1/539  | 32/23843  | 0.519142 | 0.730096 | 0.688896 | Lrrk2       |
| GO_BP_m3GO:005111cofactor tra1/539 | 32/23843  | 0.519142 | 0.730096 | 0.688896 | Slc19a1     |
| GO_BP_m3GO:006014regulation 1/539  | 32/23843  | 0.519142 | 0.730096 | 0.688896 | Myod1       |
| GO_BP_m3GO:006020long term s1/539  | 32/23843  | 0.519142 | 0.730096 | 0.688896 | Bcl2l1      |
| GO_BP_m3GO:006048lung epithe1/539  | 32/23843  | 0.519142 | 0.730096 | 0.688896 | Klf2        |

|                                     |           |          |          |          |             |
|-------------------------------------|-----------|----------|----------|----------|-------------|
| GO_BP_m3GO:006066embryonic 1/539    | 32/23843  | 0.519142 | 0.730096 | 0.688896 | Esx1        |
| GO_BP_m3GO:006104cell growth1/539   | 32/23843  | 0.519142 | 0.730096 | 0.688896 | Ctdp1       |
| GO_BP_m3GO:190211negative re1/539   | 32/23843  | 0.519142 | 0.730096 | 0.688896 | Lrrk2       |
| GO_BP_m3GO:190268mitochond 1/539    | 32/23843  | 0.519142 | 0.730096 | 0.688896 | Ier3        |
| GO_BP_m3GO:006082regulation 5/539   | 211/23843 | 0.520477 | 0.731734 | 0.690442 | Axin2/Dixd  |
| GO_BP_m3GO:003241negative re2/539   | 77/23843  | 0.522226 | 0.732037 | 0.690728 | Stoml1/Tw   |
| GO_BP_m3GO:004324negative re2/539   | 77/23843  | 0.522226 | 0.732037 | 0.690728 | Ckap2/Car   |
| GO_BP_m3GO:005134regulation 2/539   | 77/23843  | 0.522226 | 0.732037 | 0.690728 | Fdx1/Lrrk2  |
| GO_BP_m3GO:005145regulation 2/539   | 77/23843  | 0.522226 | 0.732037 | 0.690728 | Avp/Lrrk2   |
| GO_BP_m3GO:00517Cinteraction 2/539  | 77/23843  | 0.522226 | 0.732037 | 0.690728 | Ccl5/Ctdp1  |
| GO_BP_m3GO:006011inner ear r2/539   | 77/23843  | 0.522226 | 0.732037 | 0.690728 | Hes1/Whrr   |
| GO_BP_m3GO:006164cytoskeletc2/539   | 77/23843  | 0.522226 | 0.732037 | 0.690728 | Ckap2/Rhc   |
| GO_BP_m3GO:19016Calpha-amir2/539    | 77/23843  | 0.522226 | 0.732037 | 0.690728 | Gcsh/Thnsl  |
| GO_BP_m3GO:190331negative re2/539   | 77/23843  | 0.522226 | 0.732037 | 0.690728 | Axin2/Ctr9  |
| GO_BP_m3GO:000715leukocyte c7/539   | 301/23843 | 0.522943 | 0.732667 | 0.691322 | Btn1a1/Ccl  |
| GO_BP_m3GO:00511Cregulation 3/539   | 122/23843 | 0.523016 | 0.732667 | 0.691322 | Hes1/Trim6  |
| GO_BP_m3GO:000091cytokines 4/539    | 167/23843 | 0.52381  | 0.732689 | 0.691343 | Bcl2l1/Ckap |
| GO_BP_m3GO:000639tRNA meta4/539     | 167/23843 | 0.52381  | 0.732689 | 0.691343 | Trmo/Pus7   |
| GO_BP_m3GO:190165cellular res6/539  | 257/23843 | 0.525553 | 0.732689 | 0.691343 | Foxc2/Ghrf  |
| GO_BP_m3GO:00072Cpositive re7/539   | 302/23843 | 0.526452 | 0.732689 | 0.691343 | Avp/Gpr3/   |
| GO_BP_m3GO:00091Ccoenzyme 4/539     | 168/23843 | 0.52851  | 0.732689 | 0.691343 | Dlat/Dld/H  |
| GO_BP_m3GO:00434Cprotein kin4/539   | 168/23843 | 0.52851  | 0.732689 | 0.691343 | Ccl5/Otud3  |
| GO_BP_m3GO:000276regulation 3/539   | 123/23843 | 0.528516 | 0.732689 | 0.691343 | Ccl5/Tmer   |
| GO_BP_m3GO:190018regulation 3/539   | 123/23843 | 0.528516 | 0.732689 | 0.691343 | Lrrk2/Nf2/f |
| GO_BP_m3GO:190465glucose tra3/539   | 123/23843 | 0.528516 | 0.732689 | 0.691343 | Gip/Prkcz/! |
| GO_BP_m3GO:000681sodium ion5/539    | 213/23843 | 0.528838 | 0.732689 | 0.691343 | Catsper4/N  |
| GO_BP_m3GO:004513developme5/539     | 213/23843 | 0.528838 | 0.732689 | 0.691343 | Bcl2l1/Ptpr |
| GO_BP_m3GO:000694regulation 2/539   | 78/23843  | 0.529161 | 0.732689 | 0.691343 | Tnnt3/Ucn   |
| GO_BP_m3GO:001092negative re2/539   | 78/23843  | 0.529161 | 0.732689 | 0.691343 | Gpatch2/Sl  |
| GO_BP_m3GO:004584positive re2/539   | 78/23843  | 0.529161 | 0.732689 | 0.691343 | Cdon/Myo    |
| GO_BP_m3GO:004603ADP metak2/539     | 78/23843  | 0.529161 | 0.732689 | 0.691343 | Hk1/Ier3    |
| GO_BP_m3GO:004863positive re2/539   | 78/23843  | 0.529161 | 0.732689 | 0.691343 | Cdon/Myo    |
| GO_BP_m3GO:00513Cestablishm1/539    | 78/23843  | 0.529161 | 0.732689 | 0.691343 | Ankle1/Ccc  |
| GO_BP_m3GO:007061regulation 2/539   | 78/23843  | 0.529161 | 0.732689 | 0.691343 | Cd46/Lrrk2  |
| GO_BP_m3GO:00000C mitochond 1/539   | 33/23843  | 0.530027 | 0.732689 | 0.691343 | Mgme1       |
| GO_BP_m3GO:000046maturation 1/539   | 33/23843  | 0.530027 | 0.732689 | 0.691343 | Nsa2        |
| GO_BP_m3GO:00061C citrate met 1/539 | 33/23843  | 0.530027 | 0.732689 | 0.691343 | Dlat        |
| GO_BP_m3GO:000638transcriptic1/539  | 33/23843  | 0.530027 | 0.732689 | 0.691343 | Snapc1      |
| GO_BP_m3GO:001059regulation 1/539   | 33/23843  | 0.530027 | 0.732689 | 0.691343 | Carmil2     |
| GO_BP_m3GO:003303regulation 1/539   | 33/23843  | 0.530027 | 0.732689 | 0.691343 | Ccl5        |
| GO_BP_m3GO:004562regulation 1/539   | 33/23843  | 0.530027 | 0.732689 | 0.691343 | Prkcz       |
| GO_BP_m3GO:004574negative re1/539   | 33/23843  | 0.530027 | 0.732689 | 0.691343 | Bend6       |
| GO_BP_m3GO:004587negative re1/539   | 33/23843  | 0.530027 | 0.732689 | 0.691343 | Ptch1       |
| GO_BP_m3GO:004591positive re1/539   | 33/23843  | 0.530027 | 0.732689 | 0.691343 | Exosc6      |
| GO_BP_m3GO:005068negative re1/539   | 33/23843  | 0.530027 | 0.732689 | 0.691343 | Ctr9        |
| GO_BP_m3GO:005195negative re1/539   | 33/23843  | 0.530027 | 0.732689 | 0.691343 | Syt4        |
| GO_BP_m3GO:005509acylglycerc1/539   | 33/23843  | 0.530027 | 0.732689 | 0.691343 | Gip         |
| GO_BP_m3GO:006033type I inter 1/539 | 33/23843  | 0.530027 | 0.732689 | 0.691343 | Trim6       |

|                                |       |           |          |          |          |             |
|--------------------------------|-------|-----------|----------|----------|----------|-------------|
| GO_BP_m3GO:006047lung cell di  | 1/539 | 33/23843  | 0.530027 | 0.732689 | 0.691343 | Klf2        |
| GO_BP_m3GO:007032triglyceride  | 1/539 | 33/23843  | 0.530027 | 0.732689 | 0.691343 | Gip         |
| GO_BP_m3GO:007135cellular res  | 1/539 | 33/23843  | 0.530027 | 0.732689 | 0.691343 | Trim6       |
| GO_BP_m3GO:190074regulation    | 1/539 | 33/23843  | 0.530027 | 0.732689 | 0.691343 | Bmp2        |
| GO_BP_m3GO:190305regulation    | 1/539 | 33/23843  | 0.530027 | 0.732689 | 0.691343 | Carmil2     |
| GO_BP_m3GO:190320regulation    | 1/539 | 33/23843  | 0.530027 | 0.732689 | 0.691343 | Lrrk2       |
| GO_BP_m3GO:190358positive re   | 1/539 | 33/23843  | 0.530027 | 0.732689 | 0.691343 | Bcl2l1      |
| GO_BP_m3GO:190395regulation    | 1/539 | 33/23843  | 0.530027 | 0.732689 | 0.691343 | Hk1         |
| GO_BP_m3GO:200024regulation    | 1/539 | 33/23843  | 0.530027 | 0.732689 | 0.691343 | Hck         |
| GO_BP_m3GO:000246adaptive in   | 9/539 | 393/23843 | 0.531317 | 0.734237 | 0.692804 | Aire/Cd46/  |
| GO_BP_m3GO:000189placenta de   | 4/539 | 169/23843 | 0.533187 | 0.736584 | 0.695018 | Ccnf/Esx1/  |
| GO_BP_m3GO:000719adenylate c   | 2/539 | 79/23843  | 0.536027 | 0.737535 | 0.695916 | Grm4/S1pr   |
| GO_BP_m3GO:003410regulation    | 2/539 | 79/23843  | 0.536027 | 0.737535 | 0.695916 | Abr/S1pr1   |
| GO_BP_m3GO:003803signal trans  | 2/539 | 79/23843  | 0.536027 | 0.737535 | 0.695916 | Bcl2l1/Ww   |
| GO_BP_m3GO:005000chromosom     | 2/539 | 79/23843  | 0.536027 | 0.737535 | 0.695916 | Ankle1/Ccc  |
| GO_BP_m3GO:009719extrinsic ap  | 2/539 | 79/23843  | 0.536027 | 0.737535 | 0.695916 | Bcl2l1/Ww   |
| GO_BP_m3GO:190186positive re   | 2/539 | 79/23843  | 0.536027 | 0.737535 | 0.695916 | Cdon/Myo    |
| GO_BP_m3GO:001703protein im    | 5/539 | 215/23843 | 0.537133 | 0.737535 | 0.695916 | Lrrk2/Nxt1, |
| GO_BP_m3GO:002240negative re   | 4/539 | 170/23843 | 0.537841 | 0.737535 | 0.695916 | Bmp2/Btn1   |
| GO_BP_m3GO:000864hexose trar   | 3/539 | 125/23843 | 0.539409 | 0.737535 | 0.695916 | Gip/Prkcz/! |
| GO_BP_m3GO:003109regeneratio   | 3/539 | 125/23843 | 0.539409 | 0.737535 | 0.695916 | Myod1/Ptp   |
| GO_BP_m3GO:003476negative re   | 3/539 | 125/23843 | 0.539409 | 0.737535 | 0.695916 | Hamp2/Stc   |
| GO_BP_m3GO:000673coenzyme      | 7/539 | 306/23843 | 0.54039  | 0.737535 | 0.695916 | Dlat/Dld/Fc |
| GO_BP_m3GO:000691nucleocyto    | 7/539 | 306/23843 | 0.54039  | 0.737535 | 0.695916 | Ankle1/Ier3 |
| GO_BP_m3GO:000916nucleotide    | 7/539 | 306/23843 | 0.54039  | 0.737535 | 0.695916 | Avp/Bcl2l1, |
| GO_BP_m3GO:004887homeostas     | 7/539 | 306/23843 | 0.54039  | 0.737535 | 0.695916 | Atxn2/Klf2/ |
| GO_BP_m3GO:003465nucleobase    | 9/539 | 396/23843 | 0.540502 | 0.737535 | 0.695916 | Axin2/Dis3. |
| GO_BP_m3GO:001063epithelial c  | 6/539 | 261/23843 | 0.540643 | 0.737535 | 0.695916 | Foxc2/Ltb4  |
| GO_BP_m3GO:004592negative re   | 6/539 | 261/23843 | 0.540643 | 0.737535 | 0.695916 | Atxn2/Ctdp  |
| GO_BP_m3GO:000195negative re   | 1/539 | 34/23843  | 0.540666 | 0.737535 | 0.695916 | Plet1       |
| GO_BP_m3GO:000236T cell cyto   | 1/539 | 34/23843  | 0.540666 | 0.737535 | 0.695916 | Prkcz       |
| GO_BP_m3GO:000267positive re   | 1/539 | 34/23843  | 0.540666 | 0.737535 | 0.695916 | Ccl5        |
| GO_BP_m3GO:001400oligodendr    | 1/539 | 34/23843  | 0.540666 | 0.737535 | 0.695916 | Sox10       |
| GO_BP_m3GO:002184cell prolifer | 1/539 | 34/23843  | 0.540666 | 0.737535 | 0.695916 | Dixdc1      |
| GO_BP_m3GO:003111regulation    | 1/539 | 34/23843  | 0.540666 | 0.737535 | 0.695916 | Ckap2       |
| GO_BP_m3GO:003273positive re   | 1/539 | 34/23843  | 0.540666 | 0.737535 | 0.695916 | Hk1         |
| GO_BP_m3GO:003314negative re   | 1/539 | 34/23843  | 0.540666 | 0.737535 | 0.695916 | Tcf21       |
| GO_BP_m3GO:003424regulation    | 1/539 | 34/23843  | 0.540666 | 0.737535 | 0.695916 | Ctr9        |
| GO_BP_m3GO:003511embryonic     | 1/539 | 34/23843  | 0.540666 | 0.737535 | 0.695916 | Twist1      |
| GO_BP_m3GO:004002regulation    | 1/539 | 34/23843  | 0.540666 | 0.737535 | 0.695916 | Gpr3        |
| GO_BP_m3GO:004409membrane      | 1/539 | 34/23843  | 0.540666 | 0.737535 | 0.695916 | Nlgn1       |
| GO_BP_m3GO:004500DNA-depe      | 1/539 | 34/23843  | 0.540666 | 0.737535 | 0.695916 | Mms22l      |
| GO_BP_m3GO:004632regulation    | 1/539 | 34/23843  | 0.540666 | 0.737535 | 0.695916 | Twist1      |
| GO_BP_m3GO:007057regulation    | 1/539 | 34/23843  | 0.540666 | 0.737535 | 0.695916 | Ptpfr       |
| GO_BP_m3GO:007135cellular res  | 1/539 | 34/23843  | 0.540666 | 0.737535 | 0.695916 | P2ry6       |
| GO_BP_m3GO:190001regulation    | 1/539 | 34/23843  | 0.540666 | 0.737535 | 0.695916 | Il17d       |
| GO_BP_m3GO:199008response tr   | 1/539 | 34/23843  | 0.540666 | 0.737535 | 0.695916 | Hes1        |
| GO_BP_m3GO:199009cellular res  | 1/539 | 34/23843  | 0.540666 | 0.737535 | 0.695916 | Hes1        |



|                                 |        |           |          |          |          |             |
|---------------------------------|--------|-----------|----------|----------|----------|-------------|
| GO_BP_m3GO:20001C positive reg  | 1/539  | 34/23843  | 0.540666 | 0.737535 | 0.695916 | Ccl5        |
| GO_BP_m3GO:200077 regulation    | 1/539  | 34/23843  | 0.540666 | 0.737535 | 0.695916 | Twist1      |
| GO_BP_m3GO:00467C heterocycle   | 10/539 | 441/23843 | 0.540745 | 0.737535 | 0.695916 | Axin2/Dis3  |
| GO_BP_m3GO:000647 protein me    | 4/539  | 171/23843 | 0.542472 | 0.738494 | 0.696821 | Ctr9/Kdm4   |
| GO_BP_m3GO:000821 protein alk   | 4/539  | 171/23843 | 0.542472 | 0.738494 | 0.696821 | Ctr9/Kdm4   |
| GO_BP_m3GO:00305C BMP signal    | 4/539  | 171/23843 | 0.542472 | 0.738494 | 0.696821 | Bmp2/Gdf    |
| GO_BP_m3GO:004561 regulation    | 4/539  | 171/23843 | 0.542472 | 0.738494 | 0.696821 | Cd46/Ihh/F  |
| GO_BP_m3GO:00229C respiratory   | 2/539  | 80/23843  | 0.542823 | 0.738494 | 0.696821 | Dld/Slc37a  |
| GO_BP_m3GO:004472 DNA meth      | 2/539  | 80/23843  | 0.542823 | 0.738494 | 0.696821 | Mov1011/P   |
| GO_BP_m3GO:19001E positive reg  | 2/539  | 80/23843  | 0.542823 | 0.738494 | 0.696821 | Lrrk2/Ptpn1 |
| GO_BP_m3GO:190331 regulation    | 2/539  | 80/23843  | 0.542823 | 0.738494 | 0.696821 | Cd46/Lrrk2  |
| GO_BP_m3GO:004217 regulation    | 8/539  | 352/23843 | 0.543601 | 0.739318 | 0.697598 | Bag5/Grin2  |
| GO_BP_m3GO:00511E nuclear tra   | 7/539  | 307/23843 | 0.543848 | 0.73942  | 0.697695 | Ankle1/Irf3 |
| GO_BP_m3GO:00066E fatty acid b  | 3/539  | 126/23843 | 0.544801 | 0.740481 | 0.698695 | Avp/Elovl2  |
| GO_BP_m3GO:00900E regulation    | 5/539  | 217/23843 | 0.545362 | 0.740789 | 0.698986 | Bmp2/Gdf    |
| GO_BP_m3GO:00901E epithelium    | 6/539  | 263/23843 | 0.54811  | 0.740789 | 0.698986 | Foxc2/Ltb4  |
| GO_BP_m3GO:000721 glutamate     | 2/539  | 81/23843  | 0.549551 | 0.740789 | 0.698986 | Grm4/Nlgr   |
| GO_BP_m3GO:001921 regulation    | 2/539  | 81/23843  | 0.549551 | 0.740789 | 0.698986 | Avp/Twist1  |
| GO_BP_m3GO:003202 positive reg  | 2/539  | 81/23843  | 0.549551 | 0.740789 | 0.698986 | Gip/Nkx6-1  |
| GO_BP_m3GO:00705C calcium ior   | 2/539  | 81/23843  | 0.549551 | 0.740789 | 0.698986 | Hes1/Ucn    |
| GO_BP_m3GO:19004C regulation    | 2/539  | 81/23843  | 0.549551 | 0.740789 | 0.698986 | Bag5/Lrrk2  |
| GO_BP_m3GO:19019E positive reg  | 2/539  | 81/23843  | 0.549551 | 0.740789 | 0.698986 | Neurog1/L   |
| GO_BP_m3GO:000681 calcium ior   | 9/539  | 399/23843 | 0.549619 | 0.740789 | 0.698986 | Catsper4/C  |
| GO_BP_m3GO:001574 monosacch     | 3/539  | 127/23843 | 0.550156 | 0.740789 | 0.698986 | Gip/Prkcz/! |
| GO_BP_m3GO:00015C neurotrans    | 1/539  | 35/23843  | 0.551064 | 0.740789 | 0.698986 | Gpm6b       |
| GO_BP_m3GO:000292 regulation    | 1/539  | 35/23843  | 0.551064 | 0.740789 | 0.698986 | Cd46        |
| GO_BP_m3GO:00067E one-carbo     | 1/539  | 35/23843  | 0.551064 | 0.740789 | 0.698986 | Car6        |
| GO_BP_m3GO:000682 iron ion tra  | 1/539  | 35/23843  | 0.551064 | 0.740789 | 0.698986 | Hamp2       |
| GO_BP_m3GO:00070E mitotic spir  | 1/539  | 35/23843  | 0.551064 | 0.740789 | 0.698986 | Mad211      |
| GO_BP_m3GO:003167 cellular res  | 1/539  | 35/23843  | 0.551064 | 0.740789 | 0.698986 | Pdia3       |
| GO_BP_m3GO:00322C negative re   | 1/539  | 35/23843  | 0.551064 | 0.740789 | 0.698986 | Gnl3l       |
| GO_BP_m3GO:00326E interleukin   | 1/539  | 35/23843  | 0.551064 | 0.740789 | 0.698986 | Prkcz       |
| GO_BP_m3GO:00330C regulation    | 1/539  | 35/23843  | 0.551064 | 0.740789 | 0.698986 | Foxf1       |
| GO_BP_m3GO:00357E positive reg  | 1/539  | 35/23843  | 0.551064 | 0.740789 | 0.698986 | Irf3        |
| GO_BP_m3GO:003647 cell death i  | 1/539  | 35/23843  | 0.551064 | 0.740789 | 0.698986 | Lrrk2       |
| GO_BP_m3GO:00423C regulation    | 1/539  | 35/23843  | 0.551064 | 0.740789 | 0.698986 | Avp         |
| GO_BP_m3GO:00433C regulation    | 1/539  | 35/23843  | 0.551064 | 0.740789 | 0.698986 | Foxf1       |
| GO_BP_m3GO:004662 negative re   | 1/539  | 35/23843  | 0.551064 | 0.740789 | 0.698986 | Ctdp1       |
| GO_BP_m3GO:00466E negative re   | 1/539  | 35/23843  | 0.551064 | 0.740789 | 0.698986 | Ihh         |
| GO_BP_m3GO:00514E intracellula  | 1/539  | 35/23843  | 0.551064 | 0.740789 | 0.698986 | Avp         |
| GO_BP_m3GO:00516E actin filam   | 1/539  | 35/23843  | 0.551064 | 0.740789 | 0.698986 | Carmil2     |
| GO_BP_m3GO:00519E positive reg  | 1/539  | 35/23843  | 0.551064 | 0.740789 | 0.698986 | Nlgn1       |
| GO_BP_m3GO:006044 epithelial ti | 1/539  | 35/23843  | 0.551064 | 0.740789 | 0.698986 | Foxf1       |
| GO_BP_m3GO:007117 spindle ass   | 1/539  | 35/23843  | 0.551064 | 0.740789 | 0.698986 | Mad211      |
| GO_BP_m3GO:190197 regulation    | 1/539  | 35/23843  | 0.551064 | 0.740789 | 0.698986 | Mad211      |
| GO_BP_m3GO:200017 negative re   | 1/539  | 35/23843  | 0.551064 | 0.740789 | 0.698986 | Nlgn1       |
| GO_BP_m3GO:20004C positive reg  | 1/539  | 35/23843  | 0.551064 | 0.740789 | 0.698986 | Ccl5        |
| GO_BP_m3GO:20007E regulation    | 1/539  | 35/23843  | 0.551064 | 0.740789 | 0.698986 | Lrrk2       |

|                                      |           |          |          |          |             |
|--------------------------------------|-----------|----------|----------|----------|-------------|
| GO_BP_m3GO:200103regulation 1/539    | 35/23843  | 0.551064 | 0.740789 | 0.698986 | Lrrk2       |
| GO_BP_m3GO:000989negative re6/539    | 264/23843 | 0.551823 | 0.741577 | 0.699729 | Axin2/Bagf  |
| GO_BP_m3GO:001003glial cell dif5/539 | 219/23843 | 0.553521 | 0.74237  | 0.700477 | Atf5/Bmp2   |
| GO_BP_m3GO:004340positive re5/539    | 219/23843 | 0.553521 | 0.74237  | 0.700477 | Bmp2/Grm    |
| GO_BP_m3GO:005090leukocyte r7/539    | 310/23843 | 0.554158 | 0.74237  | 0.700477 | Abr/Aire/C  |
| GO_BP_m3GO:000920purine ribo3/539    | 128/23843 | 0.555473 | 0.74237  | 0.700477 | Bcl2l1/Hk1. |
| GO_BP_m3GO:000945RNA modif3/539      | 128/23843 | 0.555473 | 0.74237  | 0.700477 | Trmo/Pus7   |
| GO_BP_m3GO:001021response tr3/539    | 128/23843 | 0.555473 | 0.74237  | 0.700477 | Bcl2l1/Kdr  |
| GO_BP_m3GO:004362cellular prc3/539   | 128/23843 | 0.555473 | 0.74237  | 0.700477 | Ckap2/Car   |
| GO_BP_m3GO:005500cardiac mu3/539     | 128/23843 | 0.555473 | 0.74237  | 0.700477 | Bmp2/Ctdf   |
| GO_BP_m3GO:006007canonical v6/539    | 265/23843 | 0.555522 | 0.74237  | 0.700477 | Axin2/Dixd  |
| GO_BP_m3GO:003020glycosamin2/539     | 82/23843  | 0.556208 | 0.74237  | 0.700477 | Itih1/Ndst2 |
| GO_BP_m3GO:003064regulation 2/539    | 82/23843  | 0.556208 | 0.74237  | 0.700477 | Avp/Lrrk2   |
| GO_BP_m3GO:003111regulation 2/539    | 82/23843  | 0.556208 | 0.74237  | 0.700477 | Ckap2/Sgk   |
| GO_BP_m3GO:003264regulation 2/539    | 82/23843  | 0.556208 | 0.74237  | 0.700477 | Ccl5/Twist1 |
| GO_BP_m3GO:003294negative re2/539    | 82/23843  | 0.556208 | 0.74237  | 0.700477 | Btn1a1/lhh  |
| GO_BP_m3GO:004348regulation 2/539    | 82/23843  | 0.556208 | 0.74237  | 0.700477 | Axin2/Hnrr  |
| GO_BP_m3GO:005067negative re2/539    | 82/23843  | 0.556208 | 0.74237  | 0.700477 | Btn1a1/lhh  |
| GO_BP_m3GO:004576positive re4/539    | 174/23843 | 0.556219 | 0.74237  | 0.700477 | Adm2/Ccl5   |
| GO_BP_m3GO:005079regulation 4/539    | 174/23843 | 0.556219 | 0.74237  | 0.700477 | Ccl5/Gip/N  |
| GO_BP_m3GO:000242immune re7/539      | 311/23843 | 0.557572 | 0.74237  | 0.700477 | Btn1a1/Igh  |
| GO_BP_m3GO:001571organic ani9/539    | 402/23843 | 0.558665 | 0.74237  | 0.700477 | Avp/Oxt/SI  |
| GO_BP_m3GO:001087lipid localiz8/539  | 357/23843 | 0.559627 | 0.74237  | 0.700477 | Oxt/Ptch1/  |
| GO_BP_m3GO:000914purine nuc3/539     | 129/23843 | 0.560754 | 0.74237  | 0.700477 | Bcl2l1/Hk1. |
| GO_BP_m3GO:000046maturation1/539     | 36/23843  | 0.561228 | 0.74237  | 0.700477 | Nol10       |
| GO_BP_m3GO:000156response tr1/539    | 36/23843  | 0.561228 | 0.74237  | 0.700477 | Ier3        |
| GO_BP_m3GO:000340axis elonga1/539    | 36/23843  | 0.561228 | 0.74237  | 0.700477 | Areg        |
| GO_BP_m3GO:000611regulation 1/539    | 36/23843  | 0.561228 | 0.74237  | 0.700477 | Ier3        |
| GO_BP_m3GO:000663unsaturate1/539     | 36/23843  | 0.561228 | 0.74237  | 0.700477 | Avp         |
| GO_BP_m3GO:000931oligosacchi1/539    | 36/23843  | 0.561228 | 0.74237  | 0.700477 | St6galnac5  |
| GO_BP_m3GO:001009specificatio1/539   | 36/23843  | 0.561228 | 0.74237  | 0.700477 | Axin2       |
| GO_BP_m3GO:001073protein kin.1/539   | 36/23843  | 0.561228 | 0.74237  | 0.700477 | Lrrk2       |
| GO_BP_m3GO:001083positive re1/539    | 36/23843  | 0.561228 | 0.74237  | 0.700477 | Myod1       |
| GO_BP_m3GO:003106positive re1/539    | 36/23843  | 0.561228 | 0.74237  | 0.700477 | Ctr9        |
| GO_BP_m3GO:003511embryonic 1/539     | 36/23843  | 0.561228 | 0.74237  | 0.700477 | Twist1      |
| GO_BP_m3GO:003530positive re1/539    | 36/23843  | 0.561228 | 0.74237  | 0.700477 | Dusp26      |
| GO_BP_m3GO:004001positive re1/539    | 36/23843  | 0.561228 | 0.74237  | 0.700477 | Hes1        |
| GO_BP_m3GO:004231vasodilatio1/539    | 36/23843  | 0.561228 | 0.74237  | 0.700477 | Mkks        |
| GO_BP_m3GO:004298amyloid pr1/539     | 36/23843  | 0.561228 | 0.74237  | 0.700477 | Dhcr24      |
| GO_BP_m3GO:004826response tr1/539    | 36/23843  | 0.561228 | 0.74237  | 0.700477 | Tacr1       |
| GO_BP_m3GO:004866neuron fat1/539     | 36/23843  | 0.561228 | 0.74237  | 0.700477 | Nkx6-1      |
| GO_BP_m3GO:005070regulation 1/539    | 36/23843  | 0.561228 | 0.74237  | 0.700477 | Hk1         |
| GO_BP_m3GO:005093pigment ce1/539     | 36/23843  | 0.561228 | 0.74237  | 0.700477 | Sox10       |
| GO_BP_m3GO:006025regulation 1/539    | 36/23843  | 0.561228 | 0.74237  | 0.700477 | Ucn         |
| GO_BP_m3GO:006190glial cell ac1/539  | 36/23843  | 0.561228 | 0.74237  | 0.700477 | Lrrk2       |
| GO_BP_m3GO:007020protein hor1/539    | 36/23843  | 0.561228 | 0.74237  | 0.700477 | Hsf4        |
| GO_BP_m3GO:007132cellular res1/539   | 36/23843  | 0.561228 | 0.74237  | 0.700477 | Fdx1        |
| GO_BP_m3GO:007151genetic im1/539     | 36/23843  | 0.561228 | 0.74237  | 0.700477 | Ctr9        |

|                                    |           |          |          |          |             |
|------------------------------------|-----------|----------|----------|----------|-------------|
| GO_BP_m3GO:009702dendritic c1/539  | 36/23843  | 0.561228 | 0.74237  | 0.700477 | Prtn3       |
| GO_BP_m3GO:00974Edendrite ex1/539  | 36/23843  | 0.561228 | 0.74237  | 0.700477 | Syt4        |
| GO_BP_m3GO:190222regulation 1/539  | 36/23843  | 0.561228 | 0.74237  | 0.700477 | Bcl2l1      |
| GO_BP_m3GO:19047Cregulation 1/539  | 36/23843  | 0.561228 | 0.74237  | 0.700477 | Hpgd        |
| GO_BP_m3GO:199087vascular sr1/539  | 36/23843  | 0.561228 | 0.74237  | 0.700477 | Hpgd        |
| GO_BP_m3GO:00085Eregulation 2/539  | 83/23843  | 0.562795 | 0.743298 | 0.701354 | Ihh/Ptch1   |
| GO_BP_m3GO:00091Cpurine nucl2/539  | 83/23843  | 0.562795 | 0.743298 | 0.701354 | Hk1/Ier3    |
| GO_BP_m3GO:000917purine ribo2/539  | 83/23843  | 0.562795 | 0.743298 | 0.701354 | Hk1/Ier3    |
| GO_BP_m3GO:00424Cmechanore2/539    | 83/23843  | 0.562795 | 0.743298 | 0.701354 | Hes1/Whrr   |
| GO_BP_m3GO:190187regulation 2/539  | 83/23843  | 0.562795 | 0.743298 | 0.701354 | Ckap2/Car1  |
| GO_BP_m3GO:004354protein acy5/539  | 222/23843 | 0.565623 | 0.746148 | 0.704043 | Atat1/Dld1  |
| GO_BP_m3GO:00459Cnegative re5/539  | 222/23843 | 0.565623 | 0.746148 | 0.704043 | Bcl2l1/Fanc |
| GO_BP_m3GO:00106Cpositive re3/539  | 130/23843 | 0.565996 | 0.746148 | 0.704043 | Foxc2/Rhol  |
| GO_BP_m3GO:003421carbohydr3/539    | 130/23843 | 0.565996 | 0.746148 | 0.704043 | Gip/Prkcz/  |
| GO_BP_m3GO:00516Clocalizator3/539  | 130/23843 | 0.565996 | 0.746148 | 0.704043 | Grik2/Nlgn  |
| GO_BP_m3GO:19033Cpositive re3/539  | 130/23843 | 0.565996 | 0.746148 | 0.704043 | Lrrk2/Rnf14 |
| GO_BP_m3GO:00193Cnicotinamic2/539  | 84/23843  | 0.569312 | 0.746819 | 0.704676 | Hk1/Ier3    |
| GO_BP_m3GO:19059Epositive re2/539  | 84/23843  | 0.569312 | 0.746819 | 0.704676 | Oxt/Ptch1   |
| GO_BP_m3GO:19901Cneuron prc4/539   | 177/23843 | 0.569742 | 0.746819 | 0.704676 | Nkx6-1/Prf  |
| GO_BP_m3GO:00017Cendoderm 1/539    | 37/23843  | 0.571162 | 0.746819 | 0.704676 | Ctr9        |
| GO_BP_m3GO:000194postsynapt1/539   | 37/23843  | 0.571162 | 0.746819 | 0.704676 | Nlgn1       |
| GO_BP_m3GO:00025Ccytokine pr1/539  | 37/23843  | 0.571162 | 0.746819 | 0.704676 | Il17d       |
| GO_BP_m3GO:00067C NADP met:1/539   | 37/23843  | 0.571162 | 0.746819 | 0.704676 | Fdx1        |
| GO_BP_m3GO:00080Eanterograd1/539   | 37/23843  | 0.571162 | 0.746819 | 0.704676 | Ap3s1       |
| GO_BP_m3GO:00218Eforebrain n1/539  | 37/23843  | 0.571162 | 0.746819 | 0.704676 | Atf5        |
| GO_BP_m3GO:00308Egranulocyti1/539  | 37/23843  | 0.571162 | 0.746819 | 0.704676 | L3mbtl3     |
| GO_BP_m3GO:003302myeloid ce1/539   | 37/23843  | 0.571162 | 0.746819 | 0.704676 | Ccl5        |
| GO_BP_m3GO:00358Eepithelial c1/539 | 37/23843  | 0.571162 | 0.746819 | 0.704676 | Foxc2       |
| GO_BP_m3GO:00420Ctype 2 imr1/539   | 37/23843  | 0.571162 | 0.746819 | 0.704676 | Prkcz       |
| GO_BP_m3GO:00456Cregulation 1/539  | 37/23843  | 0.571162 | 0.746819 | 0.704676 | Tgfbr1      |
| GO_BP_m3GO:00458Epositive re1/539  | 37/23843  | 0.571162 | 0.746819 | 0.704676 | Ihh         |
| GO_BP_m3GO:00460Cregulation 1/539  | 37/23843  | 0.571162 | 0.746819 | 0.704676 | Btn1a1      |
| GO_BP_m3GO:00482EmRNA stak1/539    | 37/23843  | 0.571162 | 0.746819 | 0.704676 | Axin2       |
| GO_BP_m3GO:00507Cinterleukin1/539  | 37/23843  | 0.571162 | 0.746819 | 0.704676 | Hk1         |
| GO_BP_m3GO:007117mitotic spir1/539 | 37/23843  | 0.571162 | 0.746819 | 0.704676 | Mad2l1      |
| GO_BP_m3GO:009004regulation 1/539  | 37/23843  | 0.571162 | 0.746819 | 0.704676 | Foxc2       |
| GO_BP_m3GO:19010Cguanosine1/539    | 37/23843  | 0.571162 | 0.746819 | 0.704676 | Lrrk2       |
| GO_BP_m3GO:190367positive re1/539  | 37/23843  | 0.571162 | 0.746819 | 0.704676 | Foxc2       |
| GO_BP_m3GO:190571positive re1/539  | 37/23843  | 0.571162 | 0.746819 | 0.704676 | Ier3        |
| GO_BP_m3GO:200014regulation 1/539  | 37/23843  | 0.571162 | 0.746819 | 0.704676 | Twist1      |
| GO_BP_m3GO:200102negative re1/539  | 37/23843  | 0.571162 | 0.746819 | 0.704676 | Lrrk2       |
| GO_BP_m3GO:000252acute inflar3/539 | 131/23843 | 0.571199 | 0.746819 | 0.704676 | Ccl5/Cd46/  |
| GO_BP_m3GO:00092Cribonucleo:3/539  | 131/23843 | 0.571199 | 0.746819 | 0.704676 | Bcl2l1/Hk1. |
| GO_BP_m3GO:006024anatomical8/539   | 361/23843 | 0.572273 | 0.747996 | 0.705786 | Calb2/Gnl3  |
| GO_BP_m3GO:00507Cregulation 4/539  | 178/23843 | 0.574199 | 0.750284 | 0.707945 | Ccl5/Ctdp1  |
| GO_BP_m3GO:000721neuropepti2/539   | 85/23843  | 0.575758 | 0.751408 | 0.709005 | Ltb4r2/Ucn  |
| GO_BP_m3GO:00219Ecentral ner2/539  | 85/23843  | 0.575758 | 0.751408 | 0.709005 | Atf5/Nano:  |
| GO_BP_m3GO:00229Celectron tr2/539  | 85/23843  | 0.575758 | 0.751408 | 0.709005 | Dld/Slc37a  |

|                   |               |        |           |          |          |          |             |
|-------------------|---------------|--------|-----------|----------|----------|----------|-------------|
| GO_BP_m3GO:007066 | negative re   | 2/539  | 85/23843  | 0.575758 | 0.751408 | 0.709005 | Btn1a1/Ihh  |
| GO_BP_m3GO:005109 | positive re   | 5/539  | 225/23843 | 0.577557 | 0.753525 | 0.711004 | Map3k13/I   |
| GO_BP_m3GO:003249 | response tr   | 8/539  | 363/23843 | 0.578535 | 0.753909 | 0.711366 | Abr/Ccl5/C  |
| GO_BP_m3GO:000647 | protein ac    | 4/539  | 179/23843 | 0.57863  | 0.753909 | 0.711366 | Atat1/Myo   |
| GO_BP_m3GO:001943 | aromatic c    | 10/539 | 455/23843 | 0.580559 | 0.753909 | 0.711366 | Axin2/Dis3  |
| GO_BP_m3GO:000962 | response tr   | 1/539  | 38/23843  | 0.580871 | 0.753909 | 0.711366 | Hamp2       |
| GO_BP_m3GO:003081 | regulation    | 1/539  | 38/23843  | 0.580871 | 0.753909 | 0.711366 | Ier3        |
| GO_BP_m3GO:003252 | protein exi   | 1/539  | 38/23843  | 0.580871 | 0.753909 | 0.711366 | Tmem30b     |
| GO_BP_m3GO:003278 | positive re   | 1/539  | 38/23843  | 0.580871 | 0.753909 | 0.711366 | BC048507    |
| GO_BP_m3GO:004408 | regulation    | 1/539  | 38/23843  | 0.580871 | 0.753909 | 0.711366 | Lrrk2       |
| GO_BP_m3GO:004502 | plasma me     | 1/539  | 38/23843  | 0.580871 | 0.753909 | 0.711366 | Mymk        |
| GO_BP_m3GO:004558 | negative re   | 1/539  | 38/23843  | 0.580871 | 0.753909 | 0.711366 | Ihh         |
| GO_BP_m3GO:004584 | negative re   | 1/539  | 38/23843  | 0.580871 | 0.753909 | 0.711366 | Mad211      |
| GO_BP_m3GO:005148 | positive re   | 1/539  | 38/23843  | 0.580871 | 0.753909 | 0.711366 | S1pr1       |
| GO_BP_m3GO:007235 | tricarboxyli  | 1/539  | 38/23843  | 0.580871 | 0.753909 | 0.711366 | Dlat        |
| GO_BP_m3GO:007259 | maintenan     | 1/539  | 38/23843  | 0.580871 | 0.753909 | 0.711366 | Hk1         |
| GO_BP_m3GO:009712 | receptor lo   | 1/539  | 38/23843  | 0.580871 | 0.753909 | 0.711366 | NIgn1       |
| GO_BP_m3GO:200000 | regulation    | 1/539  | 38/23843  | 0.580871 | 0.753909 | 0.711366 | Gpm6b       |
| GO_BP_m3GO:200027 | negative re   | 1/539  | 38/23843  | 0.580871 | 0.753909 | 0.711366 | Gnl3l       |
| GO_BP_m3GO:001603 | viral proce   | 6/539  | 272/23843 | 0.58101  | 0.753909 | 0.711366 | Bcl2l1/Ccl5 |
| GO_BP_m3GO:000611 | energy res    | 2/539  | 86/23843  | 0.582134 | 0.754683 | 0.712096 | Phkg2/Ppp   |
| GO_BP_m3GO:003591 | skeletal m    | 2/539  | 86/23843  | 0.582134 | 0.754683 | 0.712096 | Cdon/Myo    |
| GO_BP_m3GO:005130 | chromosor     | 2/539  | 86/23843  | 0.582134 | 0.754683 | 0.712096 | Mad211/Ut   |
| GO_BP_m3GO:005073 | positive re   | 4/539  | 180/23843 | 0.583034 | 0.755394 | 0.712766 | Areg/Ccl5/  |
| GO_BP_m3GO:005085 | B cell rece   | 4/539  | 180/23843 | 0.583034 | 0.755394 | 0.712766 | Ighv1-53/I  |
| GO_BP_m3GO:004877 | tissue rem    | 4/539  | 181/23843 | 0.587411 | 0.757787 | 0.715025 | Abr/Foxc2/  |
| GO_BP_m3GO:014001 | meiotic nu    | 4/539  | 181/23843 | 0.587411 | 0.757787 | 0.715025 | Ankle1/Ccc  |
| GO_BP_m3GO:000910 | glycoprote    | 7/539  | 320/23843 | 0.58776  | 0.757787 | 0.715025 | B3gnt6/Brr  |
| GO_BP_m3GO:000914 | nucleoside    | 6/539  | 274/23843 | 0.588156 | 0.757787 | 0.715025 | Ak7/Bcl2l1, |
| GO_BP_m3GO:000918 | ribonucleo    | 2/539  | 87/23843  | 0.588439 | 0.757787 | 0.715025 | Hk1/Ier3    |
| GO_BP_m3GO:001936 | pyridine n    | 2/539  | 87/23843  | 0.588439 | 0.757787 | 0.715025 | Hk1/Ier3    |
| GO_BP_m3GO:002187 | forebrain     | g2/539 | 87/23843  | 0.588439 | 0.757787 | 0.715025 | Atf5/Hes1   |
| GO_BP_m3GO:003307 | T cell differ | 2/539  | 87/23843  | 0.588439 | 0.757787 | 0.715025 | Aire/Ihh    |
| GO_BP_m3GO:004632 | glucose im    | 2/539  | 87/23843  | 0.588439 | 0.757787 | 0.715025 | Prkcz/Slc2a |
| GO_BP_m3GO:000756 | aging         | 5/539  | 228/23843 | 0.589315 | 0.757787 | 0.715025 | Krt83/Ghrh  |
| GO_BP_m3GO:000002 | ribosomal     | l1/539 | 39/23843  | 0.590361 | 0.757787 | 0.715025 | Rpl6l       |
| GO_BP_m3GO:000271 | positive re   | 1/539  | 39/23843  | 0.590361 | 0.757787 | 0.715025 | Prkcz       |
| GO_BP_m3GO:000630 | double-str    | 1/539  | 39/23843  | 0.590361 | 0.757787 | 0.715025 | Kdm4d       |
| GO_BP_m3GO:000668 | glycosphin    | 1/539  | 39/23843  | 0.590361 | 0.757787 | 0.715025 | St6galnac5  |
| GO_BP_m3GO:000939 | phospholip    | 1/539  | 39/23843  | 0.590361 | 0.757787 | 0.715025 | Enpp7       |
| GO_BP_m3GO:003112 | developme     | 1/539  | 39/23843  | 0.590361 | 0.757787 | 0.715025 | Bmp2        |
| GO_BP_m3GO:003164 | killing of    | c1/539 | 39/23843  | 0.590361 | 0.757787 | 0.715025 | Hamp2       |
| GO_BP_m3GO:003434 | response tr   | 1/539  | 39/23843  | 0.590361 | 0.757787 | 0.715025 | Trim6       |
| GO_BP_m3GO:003545 | cellular res  | 1/539  | 39/23843  | 0.590361 | 0.757787 | 0.715025 | Trim6       |
| GO_BP_m3GO:003817 | neurotrop     | 1/539  | 39/23843  | 0.590361 | 0.757787 | 0.715025 | Ptprf       |
| GO_BP_m3GO:004436 | disruption    | 1/539  | 39/23843  | 0.590361 | 0.757787 | 0.715025 | Hamp2       |
| GO_BP_m3GO:004574 | positive re   | 1/539  | 39/23843  | 0.590361 | 0.757787 | 0.715025 | Hes1        |
| GO_BP_m3GO:004585 | pH reducti    | 1/539  | 39/23843  | 0.590361 | 0.757787 | 0.715025 | Avp         |

|                   |                                  |        |           |          |          |          |                     |
|-------------------|----------------------------------|--------|-----------|----------|----------|----------|---------------------|
| GO_BP_m3GO:004824 | macrophage                       | 1/539  | 39/23843  | 0.590361 | 0.757787 | 0.715025 | Ccl5                |
| GO_BP_m3GO:004874 | skeletal muscle                  | 1/539  | 39/23843  | 0.590361 | 0.757787 | 0.715025 | Myod1               |
| GO_BP_m3GO:005085 | regulation                       | 1/539  | 39/23843  | 0.590361 | 0.757787 | 0.715025 | Usp12               |
| GO_BP_m3GO:005125 | positive regulation              | 1/539  | 39/23843  | 0.590361 | 0.757787 | 0.715025 | Trpc1               |
| GO_BP_m3GO:190195 | toxin transport                  | 1/539  | 39/23843  | 0.590361 | 0.757787 | 0.715025 | Mtmr12              |
| GO_BP_m3GO:190210 | negative regulation              | 1/539  | 39/23843  | 0.590361 | 0.757787 | 0.715025 | Mad2l1              |
| GO_BP_m3GO:190357 | negative regulation              | 1/539  | 39/23843  | 0.590361 | 0.757787 | 0.715025 | Lrrk2               |
| GO_BP_m3GO:200081 | negative regulation              | 1/539  | 39/23843  | 0.590361 | 0.757787 | 0.715025 | Mad2l1              |
| GO_BP_m3GO:003265 | regulation                       | 3/539  | 135/23843 | 0.591623 | 0.757787 | 0.715025 | C1qtnf4/Lrrk2/Nf2l3 |
| GO_BP_m3GO:007205 | stem cell proliferation          | 3/539  | 135/23843 | 0.591623 | 0.757787 | 0.715025 | Lrrk2/Nf2l3         |
| GO_BP_m3GO:001567 | monovalent ion transport         | 10/539 | 459/23843 | 0.591657 | 0.757787 | 0.715025 | Catsper4/Kat5       |
| GO_BP_m3GO:005140 | neuron apoptosis                 | 6/539  | 275/23843 | 0.591705 | 0.757787 | 0.715025 | Bcl2l1/Crlf1        |
| GO_BP_m3GO:003053 | adult behavior                   | 4/539  | 182/23843 | 0.591762 | 0.757787 | 0.715025 | Chrna4/Chrm1        |
| GO_BP_m3GO:004390 | negative regulation              | 4/539  | 182/23843 | 0.591762 | 0.757787 | 0.715025 | Adam24/Ctsc         |
| GO_BP_m3GO:007177 | response to hypoxia              | 4/539  | 182/23843 | 0.591762 | 0.757787 | 0.715025 | Bmp2/Gdf5           |
| GO_BP_m3GO:007177 | cellular response to hypoxia     | 4/539  | 182/23843 | 0.591762 | 0.757787 | 0.715025 | Bmp2/Gdf5           |
| GO_BP_m3GO:000004 | transition                       | 2/539  | 88/23843  | 0.594673 | 0.760608 | 0.717686 | Hamp2/Trpc1         |
| GO_BP_m3GO:000906 | cellular amino acid transport    | 2/539  | 88/23843  | 0.594673 | 0.760608 | 0.717686 | Gcsh/Thnsl          |
| GO_BP_m3GO:001055 | positive regulation              | 2/539  | 88/23843  | 0.594673 | 0.760608 | 0.717686 | Foxc2/Rhol          |
| GO_BP_m3GO:004847 | oogenesis                        | 2/539  | 88/23843  | 0.594673 | 0.760608 | 0.717686 | Ccdc155/Itih3       |
| GO_BP_m3GO:003450 | protein localization             | 6/539  | 276/23843 | 0.595238 | 0.761104 | 0.718155 | Lrrk2/Nf2l3         |
| GO_BP_m3GO:000193 | negative regulation              | 1/539  | 40/23843  | 0.599637 | 0.763999 | 0.720886 | Tgfbr1              |
| GO_BP_m3GO:000602 | glycosaminoglycan transport      | 1/539  | 40/23843  | 0.599637 | 0.763999 | 0.720886 | Ndst2               |
| GO_BP_m3GO:000637 | mRNA polyadenylation             | 1/539  | 40/23843  | 0.599637 | 0.763999 | 0.720886 | Ctr9                |
| GO_BP_m3GO:001565 | organic cation transport         | 1/539  | 40/23843  | 0.599637 | 0.763999 | 0.720886 | Slc25a17            |
| GO_BP_m3GO:003083 | negative regulation              | 1/539  | 40/23843  | 0.599637 | 0.763999 | 0.720886 | Carmil2             |
| GO_BP_m3GO:003273 | positive regulation              | 1/539  | 40/23843  | 0.599637 | 0.763999 | 0.720886 | Hk1                 |
| GO_BP_m3GO:003806 | p38MAPK activation               | 1/539  | 40/23843  | 0.599637 | 0.763999 | 0.720886 | Bmp2                |
| GO_BP_m3GO:004337 | regulation                       | 1/539  | 40/23843  | 0.599637 | 0.763999 | 0.720886 | Prkcz               |
| GO_BP_m3GO:004582 | positive regulation              | 1/539  | 40/23843  | 0.599637 | 0.763999 | 0.720886 | Ucn                 |
| GO_BP_m3GO:004645 | icosanoid transport              | 1/539  | 40/23843  | 0.599637 | 0.763999 | 0.720886 | Avp                 |
| GO_BP_m3GO:007083 | bicellular transport             | 1/539  | 40/23843  | 0.599637 | 0.763999 | 0.720886 | Prkch               |
| GO_BP_m3GO:190581 | negative regulation              | 1/539  | 40/23843  | 0.599637 | 0.763999 | 0.720886 | Mad2l1              |
| GO_BP_m3GO:000025 | nuclear division                 | 9/539  | 416/23843 | 0.599837 | 0.764027 | 0.720913 | Ankle1/Ccnc1        |
| GO_BP_m3GO:000265 | regulation                       | 4/539  | 184/23843 | 0.600382 | 0.764495 | 0.721354 | Abr/Aire/Ctsc       |
| GO_BP_m3GO:003647 | cell death induction             | 2/539  | 89/23843  | 0.600836 | 0.764619 | 0.721472 | Bag5/Lrrk2          |
| GO_BP_m3GO:004663 | regulation                       | 2/539  | 89/23843  | 0.600836 | 0.764619 | 0.721472 | Ilhh/Prkcz          |
| GO_BP_m3GO:000912 | purine nucleotide transport      | 3/539  | 137/23843 | 0.601596 | 0.76468  | 0.721529 | Bcl2l1/Hk1          |
| GO_BP_m3GO:000916 | purine ribonucleotide transport  | 3/539  | 137/23843 | 0.601596 | 0.76468  | 0.721529 | Bcl2l1/Hk1          |
| GO_BP_m3GO:003264 | tumor necrosis factor production | 3/539  | 137/23843 | 0.601596 | 0.76468  | 0.721529 | C1qtnf4/Lrrk2       |
| GO_BP_m3GO:190355 | regulation                       | 3/539  | 137/23843 | 0.601596 | 0.76468  | 0.721529 | C1qtnf4/Lrrk2       |
| GO_BP_m3GO:007155 | cellular response to hypoxia     | 4/539  | 185/23843 | 0.604651 | 0.768336 | 0.724978 | Bmp2/Hpgt           |
| GO_BP_m3GO:005065 | negative regulation              | 3/539  | 138/23843 | 0.606522 | 0.770486 | 0.727007 | Gdf5/Ptch1          |
| GO_BP_m3GO:003530 | negative regulation              | 2/539  | 90/23843  | 0.606928 | 0.770546 | 0.727064 | Gpatch2/Slit1       |
| GO_BP_m3GO:190285 | regulation                       | 2/539  | 90/23843  | 0.606928 | 0.770546 | 0.727064 | Bag5/Lrrk2          |
| GO_BP_m3GO:000925 | response to hypoxia              | 1/539  | 41/23843  | 0.608703 | 0.770976 | 0.727469 | Gip                 |
| GO_BP_m3GO:001067 | negative regulation              | 1/539  | 41/23843  | 0.608703 | 0.770976 | 0.727469 | Ier3                |
| GO_BP_m3GO:003237 | regulation                       | 1/539  | 41/23843  | 0.608703 | 0.770976 | 0.727469 | Ptch1               |

|                                     |           |          |          |          |             |
|-------------------------------------|-----------|----------|----------|----------|-------------|
| GO_BP_m3GO:003237regulation 1/539   | 41/23843  | 0.608703 | 0.770976 | 0.727469 | Ptch1       |
| GO_BP_m3GO:004218ketone bio:1/539   | 41/23843  | 0.608703 | 0.770976 | 0.727469 | Bmp2        |
| GO_BP_m3GO:005097detection c1/539   | 41/23843  | 0.608703 | 0.770976 | 0.727469 | Mkks        |
| GO_BP_m3GO:005165spindle loc.1/539  | 41/23843  | 0.608703 | 0.770976 | 0.727469 | Ccdc155     |
| GO_BP_m3GO:009034regulation 1/539   | 41/23843  | 0.608703 | 0.770976 | 0.727469 | Twist1      |
| GO_BP_m3GO:001635dendrite de6/539   | 280/23843 | 0.609208 | 0.771387 | 0.727858 | Caprin1/Cu  |
| GO_BP_m3GO:004828organelle fi10/539 | 466/23843 | 0.610747 | 0.773109 | 0.729482 | Ankle1/Ccc  |
| GO_BP_m3GO:19039Cregulation 3/539   | 139/23843 | 0.611408 | 0.773717 | 0.730056 | Ccl5/Isg20, |
| GO_BP_m3GO:007252pyridine-cc2/539   | 91/23843  | 0.61295  | 0.774723 | 0.731005 | Hk1/Ier3    |
| GO_BP_m3GO:000691phagocyto:4/539    | 187/23843 | 0.613105 | 0.774723 | 0.731005 | Arhgap25/   |
| GO_BP_m3GO:000695complemei4/539     | 187/23843 | 0.613105 | 0.774723 | 0.731005 | Cd46/Ighv:  |
| GO_BP_m3GO:004424cellular lipi4/539 | 187/23843 | 0.613105 | 0.774723 | 0.731005 | Enpp7/Slc2  |
| GO_BP_m3GO:007155response tr4/539   | 187/23843 | 0.613105 | 0.774723 | 0.731005 | Bmp2/Hpg    |
| GO_BP_m3GO:004316proteasom 8/539    | 375/23843 | 0.615178 | 0.77534  | 0.731587 | Ankzf1/Bac  |
| GO_BP_m3GO:00717Ctumor necr3/539    | 140/23843 | 0.616253 | 0.77534  | 0.731587 | C1qtnf4/Lr  |
| GO_BP_m3GO:001593nucleobase4/539    | 188/23843 | 0.617289 | 0.77534  | 0.731587 | Mcm3ap/N    |
| GO_BP_m3GO:007124cellular resj4/539 | 188/23843 | 0.617289 | 0.77534  | 0.731587 | Lrrk2/Mir10 |
| GO_BP_m3GO:000026mitochond 1/539    | 42/23843  | 0.617564 | 0.77534  | 0.731587 | Mir539      |
| GO_BP_m3GO:000597glycogen b1/539    | 42/23843  | 0.617564 | 0.77534  | 0.731587 | Phkg2       |
| GO_BP_m3GO:000695acute-pha1/539     | 42/23843  | 0.617564 | 0.77534  | 0.731587 | Ccl5        |
| GO_BP_m3GO:000925glucan bio:1/539   | 42/23843  | 0.617564 | 0.77534  | 0.731587 | Phkg2       |
| GO_BP_m3GO:001079regulation 1/539   | 42/23843  | 0.617564 | 0.77534  | 0.731587 | Trim6       |
| GO_BP_m3GO:001692protein sur1/539   | 42/23843  | 0.617564 | 0.77534  | 0.731587 | Gnl3l       |
| GO_BP_m3GO:00308Cnegative re1/539   | 42/23843  | 0.617564 | 0.77534  | 0.731587 | Ier3        |
| GO_BP_m3GO:003157spindle che1/539   | 42/23843  | 0.617564 | 0.77534  | 0.731587 | Mad21l      |
| GO_BP_m3GO:003304negative re1/539   | 42/23843  | 0.617564 | 0.77534  | 0.731587 | Mad21l      |
| GO_BP_m3GO:004348RNA stabili1/539   | 42/23843  | 0.617564 | 0.77534  | 0.731587 | Axin2       |
| GO_BP_m3GO:004361keratinocyt1/539   | 42/23843  | 0.617564 | 0.77534  | 0.731587 | Ptch1       |
| GO_BP_m3GO:004363RNA polya1/539     | 42/23843  | 0.617564 | 0.77534  | 0.731587 | Ctr9        |
| GO_BP_m3GO:005091positive chi1/539  | 42/23843  | 0.617564 | 0.77534  | 0.731587 | S1pr1       |
| GO_BP_m3GO:005164mitochond 1/539    | 42/23843  | 0.617564 | 0.77534  | 0.731587 | Lrrk2       |
| GO_BP_m3GO:005167membrane 1/539     | 42/23843  | 0.617564 | 0.77534  | 0.731587 | Defa27      |
| GO_BP_m3GO:005189negative re1/539   | 42/23843  | 0.617564 | 0.77534  | 0.731587 | Otud3       |
| GO_BP_m3GO:006013maternal p1/539    | 42/23843  | 0.617564 | 0.77534  | 0.731587 | Hmx3        |
| GO_BP_m3GO:190037negative re1/539   | 42/23843  | 0.617564 | 0.77534  | 0.731587 | Ier3        |
| GO_BP_m3GO:000004autophago2/539     | 92/23843  | 0.6189   | 0.775657 | 0.731886 | Lrrk2/Stx12 |
| GO_BP_m3GO:000167long-chain2/539    | 92/23843  | 0.6189   | 0.775657 | 0.731886 | Cyp2c38/S   |
| GO_BP_m3GO:00064C RNA expor2/539    | 92/23843  | 0.6189   | 0.775657 | 0.731886 | Nxt1/Ranb   |
| GO_BP_m3GO:004688negative re2/539   | 92/23843  | 0.6189   | 0.775657 | 0.731886 | Ucn/Ucn2    |
| GO_BP_m3GO:006002roof of mo2/539    | 92/23843  | 0.6189   | 0.775657 | 0.731886 | Tcf21/Tgfb  |
| GO_BP_m3GO:006035response tr2/539   | 92/23843  | 0.6189   | 0.775657 | 0.731886 | Chrna4/Lrr  |
| GO_BP_m3GO:004694carboxylic i6/539  | 283/23843 | 0.619508 | 0.776193 | 0.732392 | Avp/Oxt/Sl  |
| GO_BP_m3GO:007233monocarbc5/539     | 236/23843 | 0.619772 | 0.776296 | 0.732489 | Avp/Elovl2, |
| GO_BP_m3GO:000283regulation 3/539   | 141/23843 | 0.621057 | 0.777226 | 0.733366 | Ccl5/Tfeb/  |
| GO_BP_m3GO:000915ribonucleo:3/539   | 141/23843 | 0.621057 | 0.777226 | 0.733366 | Bcl2l1/Hk1, |
| GO_BP_m3GO:003461cellular resj3/539 | 141/23843 | 0.621057 | 0.777226 | 0.733366 | Ankzf1/Lrrk |
| GO_BP_m3GO:001081regulation 4/539   | 189/23843 | 0.621446 | 0.77726  | 0.733399 | Foxf1/Gpm   |
| GO_BP_m3GO:19029Cpositive re4/539   | 189/23843 | 0.621446 | 0.77726  | 0.733399 | Nf2/Carmil  |

|                               |        |           |          |          |          |            |
|-------------------------------|--------|-----------|----------|----------|----------|------------|
| GO_BP_m3GO:001584organic aci  | 6/539  | 284/23843 | 0.622908 | 0.777801 | 0.733909 | Avp/Oxt/SI |
| GO_BP_m3GO:003133positive re  | ç5/539 | 237/23843 | 0.623484 | 0.777801 | 0.733909 | Atat1/Fnip |
| GO_BP_m3GO:000166ameboidal    | 8/539  | 378/23843 | 0.624075 | 0.777801 | 0.733909 | Foxc2/Ltb4 |
| GO_BP_m3GO:001082regulation   | 2/539  | 93/23843  | 0.62478  | 0.777801 | 0.733909 | Gip/Prkcz  |
| GO_BP_m3GO:004348regulation   | 2/539  | 93/23843  | 0.62478  | 0.777801 | 0.733909 | Axin2/Hnrr |
| GO_BP_m3GO:000182blastocyst   | 11/539 | 43/23843  | 0.626225 | 0.777801 | 0.733909 | Ctr9       |
| GO_BP_m3GO:000196negative re  | 1/539  | 43/23843  | 0.626225 | 0.777801 | 0.733909 | Ptprf      |
| GO_BP_m3GO:000325regulation   | 1/539  | 43/23843  | 0.626225 | 0.777801 | 0.733909 | Lrrk2      |
| GO_BP_m3GO:000721dopamine     | 1/539  | 43/23843  | 0.626225 | 0.777801 | 0.733909 | Lrrk2      |
| GO_BP_m3GO:001025NADH deh     | 1/539  | 43/23843  | 0.626225 | 0.777801 | 0.733909 | Bcs1l      |
| GO_BP_m3GO:00149Cmyotube c    | 1/539  | 43/23843  | 0.626225 | 0.777801 | 0.733909 | Myod1      |
| GO_BP_m3GO:003016proteoglyc   | 1/539  | 43/23843  | 0.626225 | 0.777801 | 0.733909 | Ndst2      |
| GO_BP_m3GO:00311Caxon reger   | 1/539  | 43/23843  | 0.626225 | 0.777801 | 0.733909 | Ptprf      |
| GO_BP_m3GO:003275positive re  | ç1/539 | 43/23843  | 0.626225 | 0.777801 | 0.733909 | Il17d      |
| GO_BP_m3GO:003298mitochond    | 1/539  | 43/23843  | 0.626225 | 0.777801 | 0.733909 | Bcs1l      |
| GO_BP_m3GO:00451Cintermedia   | 1/539  | 43/23843  | 0.626225 | 0.777801 | 0.733909 | Fam83h     |
| GO_BP_m3GO:00507Cinterleukin  | 1/539  | 43/23843  | 0.626225 | 0.777801 | 0.733909 | Hk1        |
| GO_BP_m3GO:008601membrane     | 1/539  | 43/23843  | 0.626225 | 0.777801 | 0.733909 | Catsper4   |
| GO_BP_m3GO:009031negative re  | 1/539  | 43/23843  | 0.626225 | 0.777801 | 0.733909 | Lrrk2      |
| GO_BP_m3GO:190103regulation   | 1/539  | 43/23843  | 0.626225 | 0.777801 | 0.733909 | Lrrk2      |
| GO_BP_m3GO:190274regulation   | 1/539  | 43/23843  | 0.626225 | 0.777801 | 0.733909 | Carmil2    |
| GO_BP_m3GO:190551macrophaç    | 1/539  | 43/23843  | 0.626225 | 0.777801 | 0.733909 | Ccl5       |
| GO_BP_m3GO:200005negative re  | 1/539  | 43/23843  | 0.626225 | 0.777801 | 0.733909 | Bag5       |
| GO_BP_m3GO:200125negative re  | 1/539  | 43/23843  | 0.626225 | 0.777801 | 0.733909 | Stoml1     |
| GO_BP_m3GO:004858developme    | 5/539  | 238/23843 | 0.627174 | 0.778754 | 0.734809 | Ctdp1/Nkx  |
| GO_BP_m3GO:004358skin develo  | 6/539  | 286/23843 | 0.629654 | 0.781181 | 0.737098 | Cela2a/Dhc |
| GO_BP_m3GO:00315Cprotein-co   | 4/539  | 191/23843 | 0.629673 | 0.781181 | 0.737098 | Cep131/Ex  |
| GO_BP_m3GO:190401positive re  | ç4/539 | 191/23843 | 0.629673 | 0.781181 | 0.737098 | Adm2/Ccl5  |
| GO_BP_m3GO:005095sensory pe   | 3/539  | 143/23843 | 0.630541 | 0.781415 | 0.737319 | Hsf4/Nxn12 |
| GO_BP_m3GO:000157microtubul   | 2/539  | 94/23843  | 0.63059  | 0.781415 | 0.737319 | Ak7/Cep13  |
| GO_BP_m3GO:004563negative re  | 2/539  | 94/23843  | 0.63059  | 0.781415 | 0.737319 | Ctr9/Tmerr |
| GO_BP_m3GO:19021Cnegative re  | 2/539  | 94/23843  | 0.63059  | 0.781415 | 0.737319 | lhh/Tmem1  |
| GO_BP_m3GO:000762circadian r  | 4/539  | 192/23843 | 0.633744 | 0.784684 | 0.740404 | Atf5/Ghrhr |
| GO_BP_m3GO:003166cellular res | 4/539  | 192/23843 | 0.633744 | 0.784684 | 0.740404 | Lrrk2/Myoc |
| GO_BP_m3GO:000072non-recorr   | 1/539  | 44/23843  | 0.634689 | 0.784684 | 0.740404 | Kdm4d      |
| GO_BP_m3GO:000338epithelial c | 1/539  | 44/23843  | 0.634689 | 0.784684 | 0.740404 | lhh        |
| GO_BP_m3GO:003304negative re  | 1/539  | 44/23843  | 0.634689 | 0.784684 | 0.740404 | Mad211     |
| GO_BP_m3GO:00451Cintermedia   | 1/539  | 44/23843  | 0.634689 | 0.784684 | 0.740404 | Fam83h     |
| GO_BP_m3GO:005135positive re  | ç1/539 | 44/23843  | 0.634689 | 0.784684 | 0.740404 | Fdx1       |
| GO_BP_m3GO:007167regulation   | 1/539  | 44/23843  | 0.634689 | 0.784684 | 0.740404 | Ccl5       |
| GO_BP_m3GO:001833internal pe  | ç3/539 | 144/23843 | 0.635221 | 0.78489  | 0.740598 | Atat1/Myo  |
| GO_BP_m3GO:004583positive re  | ç3/539 | 144/23843 | 0.635221 | 0.78489  | 0.740598 | Avp/Disp3/ |
| GO_BP_m3GO:004513meiotic chr  | 2/539  | 95/23843  | 0.636329 | 0.785806 | 0.741463 | Ankle1/Ccc |
| GO_BP_m3GO:004684bone remo    | 2/539  | 95/23843  | 0.636329 | 0.785806 | 0.741463 | lhh/S1pr1  |
| GO_BP_m3GO:000166response tr  | 4/539  | 193/23843 | 0.637786 | 0.787152 | 0.742733 | Bmp2/Chrr  |
| GO_BP_m3GO:190305regulation   | 4/539  | 193/23843 | 0.637786 | 0.787152 | 0.742733 | Bag5/Lrrk2 |
| GO_BP_m3GO:000915purine ribo  | 9/539  | 430/23843 | 0.639062 | 0.788332 | 0.743846 | Avp/Bcl2l1 |
| GO_BP_m3GO:000223response tr  | 8/539  | 384/23843 | 0.641532 | 0.788332 | 0.743846 | Abr/Ccl5/C |

|                                     |           |          |          |          |             |
|-------------------------------------|-----------|----------|----------|----------|-------------|
| GO_BP_m3GO:000959detection c7/539   | 337/23843 | 0.641829 | 0.788332 | 0.743846 | Car6/Kcnm   |
| GO_BP_m3GO:000704cell-cell jur2/539 | 96/23843  | 0.641998 | 0.788332 | 0.743846 | Cdh26/Prk   |
| GO_BP_m3GO:190503autophago2/539     | 96/23843  | 0.641998 | 0.788332 | 0.743846 | Lrrk2/Stx12 |
| GO_BP_m3GO:000165temperatur1/539    | 45/23843  | 0.642963 | 0.788332 | 0.743846 | Ccl5        |
| GO_BP_m3GO:000263positive reç1/539  | 45/23843  | 0.642963 | 0.788332 | 0.743846 | Exosc6      |
| GO_BP_m3GO:000271positive reç1/539  | 45/23843  | 0.642963 | 0.788332 | 0.743846 | Exosc6      |
| GO_BP_m3GO:000289positive reç1/539  | 45/23843  | 0.642963 | 0.788332 | 0.743846 | Exosc6      |
| GO_BP_m3GO:000863intrinsic ap1/539  | 45/23843  | 0.642963 | 0.788332 | 0.743846 | Bag5        |
| GO_BP_m3GO:003164protein deç1/539   | 45/23843  | 0.642963 | 0.788332 | 0.743846 | Bmp2        |
| GO_BP_m3GO:003271negative re1/539   | 45/23843  | 0.642963 | 0.788332 | 0.743846 | Klf2        |
| GO_BP_m3GO:003278regulation 1/539   | 45/23843  | 0.642963 | 0.788332 | 0.743846 | Ctr9        |
| GO_BP_m3GO:004591negative re1/539   | 45/23843  | 0.642963 | 0.788332 | 0.743846 | Ier3        |
| GO_BP_m3GO:004632positive reç1/539  | 45/23843  | 0.642963 | 0.788332 | 0.743846 | Prkcz       |
| GO_BP_m3GO:004801vascular en1/539   | 45/23843  | 0.642963 | 0.788332 | 0.743846 | Foxc2       |
| GO_BP_m3GO:006032head morp1/539     | 45/23843  | 0.642963 | 0.788332 | 0.743846 | Ihh         |
| GO_BP_m3GO:006061adipose tis:1/539  | 45/23843  | 0.642963 | 0.788332 | 0.743846 | Mir103-2    |
| GO_BP_m3GO:007130cellular resj1/539 | 45/23843  | 0.642963 | 0.788332 | 0.743846 | Halr1       |
| GO_BP_m3GO:009893axonal tran1/539   | 45/23843  | 0.642963 | 0.788332 | 0.743846 | Ap3s1       |
| GO_BP_m3GO:190044regulation 1/539   | 45/23843  | 0.642963 | 0.788332 | 0.743846 | Nlgn1       |
| GO_BP_m3GO:190179negative re1/539   | 45/23843  | 0.642963 | 0.788332 | 0.743846 | Bag5        |
| GO_BP_m3GO:190237negative re1/539   | 45/23843  | 0.642963 | 0.788332 | 0.743846 | Axin2       |
| GO_BP_m3GO:001571monocarbc3/539     | 146/23843 | 0.644458 | 0.789263 | 0.744725 | Oxt/Slc25a  |
| GO_BP_m3GO:002261gland morç3/539    | 146/23843 | 0.644458 | 0.789263 | 0.744725 | Areg/Nkx2   |
| GO_BP_m3GO:004666female sex 3/539   | 146/23843 | 0.644458 | 0.789263 | 0.744725 | Bcl2l1/Ptpr |
| GO_BP_m3GO:007147cellular resj3/539 | 146/23843 | 0.644458 | 0.789263 | 0.744725 | Bcl2l1/Kdr  |
| GO_BP_m3GO:002289regulation 5/539   | 243/23843 | 0.645295 | 0.790063 | 0.745479 | Chrna4/Hk   |
| GO_BP_m3GO:000648protein gly4/539   | 195/23843 | 0.645782 | 0.790209 | 0.745617 | B3gnt6/D7   |
| GO_BP_m3GO:004341macromole4/539     | 195/23843 | 0.645782 | 0.790209 | 0.745617 | B3gnt6/D7   |
| GO_BP_m3GO:009719intrinsic ap6/539  | 291/23843 | 0.64621  | 0.790507 | 0.745899 | Bag5/Bcl2l  |
| GO_BP_m3GO:000688regulation 2/539   | 97/23843  | 0.647597 | 0.790797 | 0.746172 | Avp/Lrrk2   |
| GO_BP_m3GO:200123negative re2/539   | 97/23843  | 0.647597 | 0.790797 | 0.746172 | Bcl2l1/Tgft |
| GO_BP_m3GO:000717transmemt7/539     | 339/23843 | 0.647914 | 0.790797 | 0.746172 | Bmp2/Gdff   |
| GO_BP_m3GO:000282regulation 3/539   | 147/23843 | 0.649013 | 0.790797 | 0.746172 | Exosc6/Mir  |
| GO_BP_m3GO:000912nucleoside 3/539   | 147/23843 | 0.649013 | 0.790797 | 0.746172 | Bcl2l1/Hk1  |
| GO_BP_m3GO:000836regulation 4/539   | 196/23843 | 0.649736 | 0.790797 | 0.746172 | Nkx6-1/Slc  |
| GO_BP_m3GO:009902plasma me4/539     | 196/23843 | 0.649736 | 0.790797 | 0.746172 | Arhgap25/   |
| GO_BP_m3GO:003009myeloid ce8/539    | 387/23843 | 0.650087 | 0.790797 | 0.746172 | Ccl5/Ctr9/t |
| GO_BP_m3GO:000024spliceosom1/539    | 46/23843  | 0.65105  | 0.790797 | 0.746172 | Gcfc2       |
| GO_BP_m3GO:000152retinoid mç1/539   | 46/23843  | 0.65105  | 0.790797 | 0.746172 | Lcn5        |
| GO_BP_m3GO:000641tRNA amin1/539     | 46/23843  | 0.65105  | 0.790797 | 0.746172 | Vars        |
| GO_BP_m3GO:000699nuclear en1/539    | 46/23843  | 0.65105  | 0.790797 | 0.746172 | Ankle1      |
| GO_BP_m3GO:000906aspartate fi1/539  | 46/23843  | 0.65105  | 0.790797 | 0.746172 | Thnsl2      |
| GO_BP_m3GO:001488striated ml1/539   | 46/23843  | 0.65105  | 0.790797 | 0.746172 | Myod1       |
| GO_BP_m3GO:002260ovulation c1/539   | 46/23843  | 0.65105  | 0.790797 | 0.746172 | Ptprn       |
| GO_BP_m3GO:003166lipopolysac1/539   | 46/23843  | 0.65105  | 0.790797 | 0.746172 | Ccl5        |
| GO_BP_m3GO:003230icosanoid s1/539   | 46/23843  | 0.65105  | 0.790797 | 0.746172 | Oxt         |
| GO_BP_m3GO:004302T cell homç1/539   | 46/23843  | 0.65105  | 0.790797 | 0.746172 | Tsc22d3     |
| GO_BP_m3GO:004347regulation 1/539   | 46/23843  | 0.65105  | 0.790797 | 0.746172 | Ier3        |



|                   |               |        |           |          |          |          |             |
|-------------------|---------------|--------|-----------|----------|----------|----------|-------------|
| GO_BP_m3GO:004542 | positive re   | 1/539  | 46/23843  | 0.65105  | 0.790797 | 0.746172 | Klf2        |
| GO_BP_m3GO:005198 | negative re   | 1/539  | 46/23843  | 0.65105  | 0.790797 | 0.746172 | Mad2l1      |
| GO_BP_m3GO:006004 | regulation    | 1/539  | 46/23843  | 0.65105  | 0.790797 | 0.746172 | Tgfbr1      |
| GO_BP_m3GO:007054 | response tr   | 1/539  | 46/23843  | 0.65105  | 0.790797 | 0.746172 | P2ry6       |
| GO_BP_m3GO:007268 | protein loc   | 1/539  | 46/23843  | 0.65105  | 0.790797 | 0.746172 | Cep131      |
| GO_BP_m3GO:190440 | positive re   | 1/539  | 46/23843  | 0.65105  | 0.790797 | 0.746172 | Klf2        |
| GO_BP_m3GO:004427 | cellular nitr | 9/539  | 435/23843 | 0.65255  | 0.7922   | 0.747496 | Axin2/Dis3  |
| GO_BP_m3GO:000182 | blastocyst    | 2/539  | 98/23843  | 0.653127 | 0.7922   | 0.747496 | Ctr9/Tgfbr1 |
| GO_BP_m3GO:000218 | cytoplasmic   | 2/539  | 98/23843  | 0.653127 | 0.7922   | 0.747496 | Rpl6l/Rps3  |
| GO_BP_m3GO:003010 | natural kill  | 2/539  | 98/23843  | 0.653127 | 0.7922   | 0.747496 | Gm13287/1   |
| GO_BP_m3GO:005268 | cyclic purin  | 2/539  | 98/23843  | 0.653127 | 0.7922   | 0.747496 | Avp/Rln3    |
| GO_BP_m3GO:000690 | vesicle fusio | 3/539  | 148/23843 | 0.653528 | 0.792239 | 0.747532 | Stx12/Syt4  |
| GO_BP_m3GO:005130 | regulation    | 3/539  | 148/23843 | 0.653528 | 0.792239 | 0.747532 | Bcl2l1/Ptch |
| GO_BP_m3GO:190136 | organic cyc   | 10/539 | 483/23843 | 0.655193 | 0.794034 | 0.749226 | Axin2/Dis3  |
| GO_BP_m3GO:000598 | monosacch     | 5/539  | 246/23843 | 0.655899 | 0.794665 | 0.749821 | Dlat/Hk1/P  |
| GO_BP_m3GO:005132 | meiotic cel   | 7/539  | 342/23843 | 0.656926 | 0.794778 | 0.749928 | Ankle1/Ccc  |
| GO_BP_m3GO:000224 | hematopoi     | 3/539  | 149/23843 | 0.658    | 0.794778 | 0.749928 | Ankle1/Hes  |
| GO_BP_m3GO:000647 | internal prc  | 3/539  | 149/23843 | 0.658    | 0.794778 | 0.749928 | Atat1/Myo   |
| GO_BP_m3GO:000717 | transformir   | 3/539  | 149/23843 | 0.658    | 0.794778 | 0.749928 | Bmp2/Hpg    |
| GO_BP_m3GO:000680 | xenobiotic    | 2/539  | 99/23843  | 0.658587 | 0.794778 | 0.749928 | Cyp2c38/U   |
| GO_BP_m3GO:000918 | cyclic nucle  | 2/539  | 99/23843  | 0.658587 | 0.794778 | 0.749928 | Avp/Rln3    |
| GO_BP_m3GO:001938 | fatty acid    | 0/539  | 99/23843  | 0.658587 | 0.794778 | 0.749928 | Slc25a17/T  |
| GO_BP_m3GO:004562 | negative re   | 1/539  | 47/23843  | 0.658953 | 0.794778 | 0.749928 | Ihh         |
| GO_BP_m3GO:004618 | phenol-co     | 1/539  | 47/23843  | 0.658953 | 0.794778 | 0.749928 | Trpc1       |
| GO_BP_m3GO:004871 | regulation    | 1/539  | 47/23843  | 0.658953 | 0.794778 | 0.749928 | Hes1        |
| GO_BP_m3GO:005108 | negative re   | 1/539  | 47/23843  | 0.658953 | 0.794778 | 0.749928 | Bmp2        |
| GO_BP_m3GO:005118 | regulation    | 1/539  | 47/23843  | 0.658953 | 0.794778 | 0.749928 | Ier3        |
| GO_BP_m3GO:005198 | regulation    | 1/539  | 47/23843  | 0.658953 | 0.794778 | 0.749928 | Oxt         |
| GO_BP_m3GO:005198 | regulation    | 1/539  | 47/23843  | 0.658953 | 0.794778 | 0.749928 | Oxt         |
| GO_BP_m3GO:006078 | negative re   | 1/539  | 47/23843  | 0.658953 | 0.794778 | 0.749928 | Ptprf       |
| GO_BP_m3GO:007028 | necrotic ce   | 1/539  | 47/23843  | 0.658953 | 0.794778 | 0.749928 | Ucn         |
| GO_BP_m3GO:000920 | purine ribo   | 5/539  | 247/23843 | 0.659388 | 0.795079 | 0.750213 | Bcl2l1/Dld/ |
| GO_BP_m3GO:000278 | immune re     | 9/539  | 438/23843 | 0.660504 | 0.796202 | 0.751272 | Btn1a1/Igh  |
| GO_BP_m3GO:000270 | regulation    | 3/539  | 150/23843 | 0.662431 | 0.798076 | 0.75304  | Exosc6/Mir  |
| GO_BP_m3GO:005118 | nuclear exp   | 3/539  | 150/23843 | 0.662431 | 0.798076 | 0.75304  | Ankle1/Nxt  |
| GO_BP_m3GO:000638 | mRNA pro      | 9/539  | 439/23843 | 0.663132 | 0.798697 | 0.753626 | Celf5/Ctr9/ |
| GO_BP_m3GO:000940 | response tr   | 2/539  | 100/23843 | 0.663979 | 0.799492 | 0.754376 | Hsf4/Tacr1  |
| GO_BP_m3GO:003134 | negative re   | 4/539  | 200/23843 | 0.665258 | 0.799828 | 0.754693 | Abr/Foxf1/  |
| GO_BP_m3GO:007237 | protein act   | 4/539  | 200/23843 | 0.665258 | 0.799828 | 0.754693 | Cd46/Ighv:  |
| GO_BP_m3GO:000928 | ribonucleo    | 9/539  | 440/23843 | 0.665748 | 0.799828 | 0.754693 | Avp/Bcl2l1  |
| GO_BP_m3GO:000227 | mast cell ac  | 1/539  | 48/23843  | 0.666678 | 0.799828 | 0.754693 | Foxf1       |
| GO_BP_m3GO:000278 | negative re   | 1/539  | 48/23843  | 0.666678 | 0.799828 | 0.754693 | Tmem178     |
| GO_BP_m3GO:000712 | synapsis      | 1/539  | 48/23843  | 0.666678 | 0.799828 | 0.754693 | Ccdc155     |
| GO_BP_m3GO:001050 | RNA secon     | 1/539  | 48/23843  | 0.666678 | 0.799828 | 0.754693 | Ddx46       |
| GO_BP_m3GO:001610 | diterpenoic   | 1/539  | 48/23843  | 0.666678 | 0.799828 | 0.754693 | Lcn5        |
| GO_BP_m3GO:003164 | regulation    | 1/539  | 48/23843  | 0.666678 | 0.799828 | 0.754693 | Sox10       |
| GO_BP_m3GO:004330 | mast cell d   | 1/539  | 48/23843  | 0.666678 | 0.799828 | 0.754693 | Foxf1       |
| GO_BP_m3GO:004512 | regulation    | 1/539  | 48/23843  | 0.666678 | 0.799828 | 0.754693 | S1pr1       |

|                                     |           |          |          |          |             |
|-------------------------------------|-----------|----------|----------|----------|-------------|
| GO_BP_m3GO:190157fatty acid d1/539  | 48/23843  | 0.666678 | 0.799828 | 0.754693 | Avp         |
| GO_BP_m3GO:200123regulation 1/539   | 48/23843  | 0.666678 | 0.799828 | 0.754693 | Wwox        |
| GO_BP_m3GO:004343response tr6/539   | 298/23843 | 0.668623 | 0.801713 | 0.756472 | Foxc2/Ghrl  |
| GO_BP_m3GO:004428small mole 6/539   | 298/23843 | 0.668623 | 0.801713 | 0.756472 | Gcsh/Hk1/   |
| GO_BP_m3GO:004863positive reç4/539  | 201/23843 | 0.669064 | 0.801854 | 0.756606 | Ghrhr/Mkk   |
| GO_BP_m3GO:003444lipid oxidat2/539  | 101/23843 | 0.669301 | 0.801854 | 0.756606 | Slc25a17/T  |
| GO_BP_m3GO:003596cellular resj2/539 | 101/23843 | 0.669301 | 0.801854 | 0.756606 | Ankzf1/Stc  |
| GO_BP_m3GO:001025endomemk7/539      | 347/23843 | 0.671637 | 0.803644 | 0.758294 | Ankle1/Baç  |
| GO_BP_m3GO:006004heart contr4/539   | 202/23843 | 0.672841 | 0.803644 | 0.758294 | Oxt/Tnni2/  |
| GO_BP_m3GO:000919ribonucleo!5/539   | 251/23843 | 0.673117 | 0.803644 | 0.758294 | Bcl2l1/Dld/ |
| GO_BP_m3GO:000616purine nuc!9/539   | 443/23843 | 0.673525 | 0.803644 | 0.758294 | Avp/Bcl2l1. |
| GO_BP_m3GO:000195positive reç1/539  | 49/23843  | 0.674229 | 0.803644 | 0.758294 | Prkcz       |
| GO_BP_m3GO:000204cell migrati1/539  | 49/23843  | 0.674229 | 0.803644 | 0.758294 | Foxc2       |
| GO_BP_m3GO:000244mast cell r1/539   | 49/23843  | 0.674229 | 0.803644 | 0.758294 | Foxf1       |
| GO_BP_m3GO:001033response tr1/539   | 49/23843  | 0.674229 | 0.803644 | 0.758294 | Bcl2l1      |
| GO_BP_m3GO:001657histone ph!1/539   | 49/23843  | 0.674229 | 0.803644 | 0.758294 | Twist1      |
| GO_BP_m3GO:003083regulation 1/539   | 49/23843  | 0.674229 | 0.803644 | 0.758294 | Carmil2     |
| GO_BP_m3GO:003111regulation 1/539   | 49/23843  | 0.674229 | 0.803644 | 0.758294 | Sgk1        |
| GO_BP_m3GO:004303tRNA amin1/539     | 49/23843  | 0.674229 | 0.803644 | 0.758294 | Vars        |
| GO_BP_m3GO:004329apical junc1/539   | 49/23843  | 0.674229 | 0.803644 | 0.758294 | Prkch       |
| GO_BP_m3GO:004614pigment bi1/539    | 49/23843  | 0.674229 | 0.803644 | 0.758294 | Trpc1       |
| GO_BP_m3GO:006042lung epithe1/539   | 49/23843  | 0.674229 | 0.803644 | 0.758294 | Klf2        |
| GO_BP_m3GO:007097protein loc1/539   | 49/23843  | 0.674229 | 0.803644 | 0.758294 | Pmm1        |
| GO_BP_m3GO:190204regulation 1/539   | 49/23843  | 0.674229 | 0.803644 | 0.758294 | Bcl2l1      |
| GO_BP_m3GO:200064regulation 1/539   | 49/23843  | 0.674229 | 0.803644 | 0.758294 | Stoml1      |
| GO_BP_m3GO:00027C positive reç2/539 | 102/23843 | 0.674555 | 0.803644 | 0.758294 | Exosc6/Prk  |
| GO_BP_m3GO:000282 positive reç2/539 | 102/23843 | 0.674555 | 0.803644 | 0.758294 | Exosc6/Prk  |
| GO_BP_m3GO:200123regulation 8/539   | 396/23843 | 0.675036 | 0.803644 | 0.758294 | Avp/Bag5/   |
| GO_BP_m3GO:001839peptidyl-ly3/539   | 153/23843 | 0.675473 | 0.803644 | 0.758294 | Atat1/Myo   |
| GO_BP_m3GO:005065nucleic acic3/539  | 153/23843 | 0.675473 | 0.803644 | 0.758294 | Mcm3ap/N    |
| GO_BP_m3GO:005065RNA transç3/539    | 153/23843 | 0.675473 | 0.803644 | 0.758294 | Mcm3ap/N    |
| GO_BP_m3GO:009017organelle r3/539   | 153/23843 | 0.675473 | 0.803644 | 0.758294 | Stx12/Syt4, |
| GO_BP_m3GO:009881nuclear chr5/539   | 252/23843 | 0.676491 | 0.804525 | 0.759125 | Ankle1/Axi  |
| GO_BP_m3GO:001032membrane 4/539     | 203/23843 | 0.676588 | 0.804525 | 0.759125 | Arhgap25/   |
| GO_BP_m3GO:000152angiogene!10/539   | 492/23843 | 0.677533 | 0.805426 | 0.759976 | Adm2/Ccl5   |
| GO_BP_m3GO:007083divalent mç9/539   | 445/23843 | 0.67865  | 0.806254 | 0.760757 | Catsper4/C  |
| GO_BP_m3GO:000691phagocyto:3/539    | 154/23843 | 0.679737 | 0.806254 | 0.760757 | Ighv1-53/Iç |
| GO_BP_m3GO:00434C negative reç3/539 | 154/23843 | 0.679737 | 0.806254 | 0.760757 | Dusp26/Nf   |
| GO_BP_m3GO:000204sprouting ç2/539   | 103/23843 | 0.679741 | 0.806254 | 0.760757 | Foxc2/Klf2  |
| GO_BP_m3GO:004347pigmentati2/539    | 103/23843 | 0.679741 | 0.806254 | 0.760757 | Ihh/Sox10   |
| GO_BP_m3GO:00435C muscle adç2/539   | 103/23843 | 0.679741 | 0.806254 | 0.760757 | Ctdp1/Myc   |
| GO_BP_m3GO:001606immunoglc5/539     | 253/23843 | 0.679842 | 0.806254 | 0.760757 | Exosc6/Igh  |
| GO_BP_m3GO:000028nuclear-tra1/539   | 50/23843  | 0.681608 | 0.806254 | 0.760757 | Nanos1      |
| GO_BP_m3GO:000645'de novo' ç1/539   | 50/23843  | 0.681608 | 0.806254 | 0.760757 | Mkks        |
| GO_BP_m3GO:000689Golgi to pl:1/539  | 50/23843  | 0.681608 | 0.806254 | 0.760757 | Exoc1       |
| GO_BP_m3GO:000714male meio1/539     | 50/23843  | 0.681608 | 0.806254 | 0.760757 | Mov10l1     |
| GO_BP_m3GO:003112mRNA 3'-ç1/539     | 50/23843  | 0.681608 | 0.806254 | 0.760757 | Ctr9        |
| GO_BP_m3GO:003221regulation 1/539   | 50/23843  | 0.681608 | 0.806254 | 0.760757 | Gnl3l       |

|                                             |       |           |          |          |          |             |
|---------------------------------------------|-------|-----------|----------|----------|----------|-------------|
| GO_BP_m3GO:003545 response to stress        | 1/539 | 50/23843  | 0.681608 | 0.806254 | 0.760757 | Trim6       |
| GO_BP_m3GO:004295 amyloid precursor protein | 1/539 | 50/23843  | 0.681608 | 0.806254 | 0.760757 | Dhcr24      |
| GO_BP_m3GO:004303 amino acid                | 1/539 | 50/23843  | 0.681608 | 0.806254 | 0.760757 | Vars        |
| GO_BP_m3GO:005185 regulation                | 1/539 | 50/23843  | 0.681608 | 0.806254 | 0.760757 | Gpm6b       |
| GO_BP_m3GO:009013 regulation                | 1/539 | 50/23843  | 0.681608 | 0.806254 | 0.760757 | Gpm6b       |
| GO_BP_m3GO:004393 regulation                | 8/539 | 399/23843 | 0.683106 | 0.807657 | 0.76208  | Adam24/C    |
| GO_BP_m3GO:000915 purine ribose             | 5/539 | 254/23843 | 0.68317  | 0.807657 | 0.76208  | Avp/Bcl2l1  |
| GO_BP_m3GO:000301 heart process             | 4/539 | 205/23843 | 0.683992 | 0.808183 | 0.762577 | Oxt/Tnni2/  |
| GO_BP_m3GO:000991 epidermal                 | 4/539 | 205/23843 | 0.683992 | 0.808183 | 0.762577 | Hes1/Prkch  |
| GO_BP_m3GO:007251 divalent ion              | 9/539 | 448/23843 | 0.686245 | 0.810622 | 0.764878 | Catsper4/C  |
| GO_BP_m3GO:001972 B cell mediator           | 5/539 | 255/23843 | 0.686475 | 0.810671 | 0.764925 | Exosc6/Igh  |
| GO_BP_m3GO:005123 establishment             | 3/539 | 156/23843 | 0.68814  | 0.810766 | 0.765014 | Mcm3ap/     |
| GO_BP_m3GO:190165 response to stress        | 7/539 | 353/23843 | 0.688766 | 0.810766 | 0.765014 | Foxc2/Ghrh  |
| GO_BP_m3GO:000752 neuromuscular             | 1/539 | 51/23843  | 0.688821 | 0.810766 | 0.765014 | Lrrk2       |
| GO_BP_m3GO:003272 negative regulation       | 1/539 | 51/23843  | 0.688821 | 0.810766 | 0.765014 | Twist1      |
| GO_BP_m3GO:004364 inositol phosphate        | 1/539 | 51/23843  | 0.688821 | 0.810766 | 0.765014 | Ippk        |
| GO_BP_m3GO:004573 positive regulation       | 1/539 | 51/23843  | 0.688821 | 0.810766 | 0.765014 | Kdm4d       |
| GO_BP_m3GO:004824 lymphocyte                | 1/539 | 51/23843  | 0.688821 | 0.810766 | 0.765014 | Ccl5        |
| GO_BP_m3GO:005144 regulation                | 1/539 | 51/23843  | 0.688821 | 0.810766 | 0.765014 | Gpr3        |
| GO_BP_m3GO:005156 histone H3                | 1/539 | 51/23843  | 0.688821 | 0.810766 | 0.765014 | Ctr9        |
| GO_BP_m3GO:007171 icosanoid                 | 1/539 | 51/23843  | 0.688821 | 0.810766 | 0.765014 | Oxt         |
| GO_BP_m3GO:190157 fatty acid                | 1/539 | 51/23843  | 0.688821 | 0.810766 | 0.765014 | Oxt         |
| GO_BP_m3GO:200051 regulation                | 1/539 | 51/23843  | 0.688821 | 0.810766 | 0.765014 | Prkcz       |
| GO_BP_m3GO:000914 purine nucleotide         | 5/539 | 256/23843 | 0.689757 | 0.811161 | 0.765386 | Bcl2l1/Dld/ |
| GO_BP_m3GO:003243 regulation                | 5/539 | 256/23843 | 0.689757 | 0.811161 | 0.765386 | Chrna4/Hk   |
| GO_BP_m3GO:001053 positive regulation       | 2/539 | 105/23843 | 0.689911 | 0.811161 | 0.765386 | Lrrk2/Tfeb  |
| GO_BP_m3GO:007193 negative regulation       | 2/539 | 105/23843 | 0.689911 | 0.811161 | 0.765386 | Prkar1b/Ptj |
| GO_BP_m3GO:007008 glycosylation             | 4/539 | 207/23843 | 0.691276 | 0.812543 | 0.766691 | B3gnt6/D7   |
| GO_BP_m3GO:000756 female pregnancy          | 3/539 | 157/23843 | 0.692279 | 0.813277 | 0.767383 | Ggn/Hmx3    |
| GO_BP_m3GO:005077 negative regulation       | 3/539 | 157/23843 | 0.692279 | 0.813277 | 0.767383 | Abr/Cd46/   |
| GO_BP_m3GO:199026 neutrophil                | 2/539 | 106/23843 | 0.694896 | 0.815488 | 0.76947  | Ccl5/Prtn3  |
| GO_BP_m3GO:003086 cortical cytoskeleton     | 1/539 | 52/23843  | 0.695871 | 0.815488 | 0.76947  | Nlgn1       |
| GO_BP_m3GO:004333 negative regulation       | 1/539 | 52/23843  | 0.695871 | 0.815488 | 0.76947  | Hes1        |
| GO_BP_m3GO:004353 positive regulation       | 1/539 | 52/23843  | 0.695871 | 0.815488 | 0.76947  | Foxc2       |
| GO_BP_m3GO:004583 negative regulation       | 1/539 | 52/23843  | 0.695871 | 0.815488 | 0.76947  | Mad2l1      |
| GO_BP_m3GO:007093 protein kinase            | 1/539 | 52/23843  | 0.695871 | 0.815488 | 0.76947  | Ube2c       |
| GO_BP_m3GO:007162 regulation                | 1/539 | 52/23843  | 0.695871 | 0.815488 | 0.76947  | Ccl5        |
| GO_BP_m3GO:190236 negative regulation       | 1/539 | 52/23843  | 0.695871 | 0.815488 | 0.76947  | Axin2       |
| GO_BP_m3GO:190355 negative regulation       | 1/539 | 52/23843  | 0.695871 | 0.815488 | 0.76947  | Twist1      |
| GO_BP_m3GO:001969 ribose phosphate          | 9/539 | 452/23843 | 0.696199 | 0.815522 | 0.769501 | Avp/Bcl2l1  |
| GO_BP_m3GO:006201 regulation                | 8/539 | 404/23843 | 0.696279 | 0.815522 | 0.769501 | Avp/Bcl2l1  |
| GO_BP_m3GO:005093 detection of              | 6/539 | 308/23843 | 0.699045 | 0.81754  | 0.771406 | Car6/Olfr1  |
| GO_BP_m3GO:007122 cellular response         | 5/539 | 259/23843 | 0.69946  | 0.81754  | 0.771406 | Ccl5/Ctr9/  |
| GO_BP_m3GO:000095 nuclear-transcription     | 2/539 | 107/23843 | 0.699814 | 0.81754  | 0.771406 | Exosc6/Nai  |
| GO_BP_m3GO:004275 regulation                | 2/539 | 107/23843 | 0.699814 | 0.81754  | 0.771406 | Ghrhr/Nlgr  |
| GO_BP_m3GO:004324 regulation                | 2/539 | 107/23843 | 0.699814 | 0.81754  | 0.771406 | Ckap2/Car   |
| GO_BP_m3GO:005102 mRNA transport            | 2/539 | 107/23843 | 0.699814 | 0.81754  | 0.771406 | Mcm3ap/     |
| GO_BP_m3GO:000281 regulation                | 3/539 | 159/23843 | 0.700433 | 0.81754  | 0.771406 | Exosc6/Mir  |

|                                     |           |          |          |          |             |
|-------------------------------------|-----------|----------|----------|----------|-------------|
| GO_BP_m3GO:000703vacuole orç3/539   | 159/23843 | 0.700433 | 0.81754  | 0.771406 | Lrrk2/Stx12 |
| GO_BP_m3GO:000836regulation 3/539   | 159/23843 | 0.700433 | 0.81754  | 0.771406 | Fmn11/Hck   |
| GO_BP_m3GO:200125regulation 3/539   | 159/23843 | 0.700433 | 0.81754  | 0.771406 | Chrna4/Nlç  |
| GO_BP_m3GO:004563regulation 4/539   | 210/23843 | 0.701978 | 0.81754  | 0.771406 | Ccl5/Ctr9/1 |
| GO_BP_m3GO:000760sensory pe 5/539   | 260/23843 | 0.702648 | 0.81754  | 0.771406 | Mir106b/M   |
| GO_BP_m3GO:000254monocyte 1/539     | 53/23843  | 0.702761 | 0.81754  | 0.771406 | Ccl5        |
| GO_BP_m3GO:000687cellular iror1/539 | 53/23843  | 0.702761 | 0.81754  | 0.771406 | Hamp2       |
| GO_BP_m3GO:001590long-chain 1/539   | 53/23843  | 0.702761 | 0.81754  | 0.771406 | Slc27a4     |
| GO_BP_m3GO:003004actin filamε1/539  | 53/23843  | 0.702761 | 0.81754  | 0.771406 | Carmil2     |
| GO_BP_m3GO:003265regulation 1/539   | 53/23843  | 0.702761 | 0.81754  | 0.771406 | Hk1         |
| GO_BP_m3GO:003506regulation 1/539   | 53/23843  | 0.702761 | 0.81754  | 0.771406 | Twist1      |
| GO_BP_m3GO:004273exogenous 1/539    | 53/23843  | 0.702761 | 0.81754  | 0.771406 | Cyp2c38     |
| GO_BP_m3GO:004658negative re1/539   | 53/23843  | 0.702761 | 0.81754  | 0.771406 | Scai        |
| GO_BP_m3GO:005099regulation 1/539   | 53/23843  | 0.702761 | 0.81754  | 0.771406 | Twist1      |
| GO_BP_m3GO:007127cellular res1/539  | 53/23843  | 0.702761 | 0.81754  | 0.771406 | Nlgn1       |
| GO_BP_m3GO:190054negative re1/539   | 53/23843  | 0.702761 | 0.81754  | 0.771406 | Ier3        |
| GO_BP_m3GO:190339regulation 1/539   | 53/23843  | 0.702761 | 0.81754  | 0.771406 | Gpm6b       |
| GO_BP_m3GO:200064positive reç1/539  | 53/23843  | 0.702761 | 0.81754  | 0.771406 | Sox10       |
| GO_BP_m3GO:000184neural tubε2/539   | 108/23843 | 0.704666 | 0.818648 | 0.772452 | Ptch1/Twis  |
| GO_BP_m3GO:000282positive reç2/539  | 108/23843 | 0.704666 | 0.818648 | 0.772452 | Exosc6/Prk  |
| GO_BP_m3GO:000634chromatin 2/539    | 108/23843 | 0.704666 | 0.818648 | 0.772452 | Hypm/Uhrl   |
| GO_BP_m3GO:001046regulation 2/539   | 108/23843 | 0.704666 | 0.818648 | 0.772452 | Chrna4/Nlç  |
| GO_BP_m3GO:003236regulation 2/539   | 108/23843 | 0.704666 | 0.818648 | 0.772452 | Oxt/Ptch1   |
| GO_BP_m3GO:000616purine nuc5/539    | 261/23843 | 0.705812 | 0.819314 | 0.77308  | Avp/Bcl2l1  |
| GO_BP_m3GO:000679sulfur comç5/539   | 261/23843 | 0.705812 | 0.819314 | 0.77308  | Dlat/Dld/G  |
| GO_BP_m3GO:000961response tr5/539   | 261/23843 | 0.705812 | 0.819314 | 0.77308  | Bcl2l1/Ccl5 |
| GO_BP_m3GO:003210negative re6/539   | 311/23843 | 0.707797 | 0.820485 | 0.774185 | Abr/Foxf1/  |
| GO_BP_m3GO:002261ribonucleoç4/539   | 212/23843 | 0.708962 | 0.820485 | 0.774185 | Atxn2/Gcfc  |
| GO_BP_m3GO:000177leukocyte 12/539   | 109/23843 | 0.709453 | 0.820485 | 0.774185 | Nkx2-3/Tsc  |
| GO_BP_m3GO:000720phospholiç2/539    | 109/23843 | 0.709453 | 0.820485 | 0.774185 | Ltb4r2/S1p  |
| GO_BP_m3GO:006060tube closur2/539   | 109/23843 | 0.709453 | 0.820485 | 0.774185 | Ptch1/Twis  |
| GO_BP_m3GO:000706sister chror1/539  | 54/23843  | 0.709495 | 0.820485 | 0.774185 | Axin2       |
| GO_BP_m3GO:000833endosome 1/539     | 54/23843  | 0.709495 | 0.820485 | 0.774185 | Rhob        |
| GO_BP_m3GO:001052positive reç1/539  | 54/23843  | 0.709495 | 0.820485 | 0.774185 | Trpc1       |
| GO_BP_m3GO:003049maturation 1/539   | 54/23843  | 0.709495 | 0.820485 | 0.774185 | Nol10       |
| GO_BP_m3GO:003501somatic ste1/539   | 54/23843  | 0.709495 | 0.820485 | 0.774185 | Hes1        |
| GO_BP_m3GO:004505T cell selec1/539  | 54/23843  | 0.709495 | 0.820485 | 0.774185 | Aire        |
| GO_BP_m3GO:004598negative re1/539   | 54/23843  | 0.709495 | 0.820485 | 0.774185 | Ier3        |
| GO_BP_m3GO:004617polyol bios1/539   | 54/23843  | 0.709495 | 0.820485 | 0.774185 | Ippk        |
| GO_BP_m3GO:004826positive reç1/539  | 54/23843  | 0.709495 | 0.820485 | 0.774185 | Ptpn5       |
| GO_BP_m3GO:000716negative re5/539   | 263/23843 | 0.71207  | 0.822242 | 0.775843 | Bmp2/Btn1   |
| GO_BP_m3GO:000910glycoprote 5/539   | 263/23843 | 0.71207  | 0.822242 | 0.775843 | B3gnt6/D7   |
| GO_BP_m3GO:000926ribonucleoç5/539   | 263/23843 | 0.71207  | 0.822242 | 0.775843 | Avp/Bcl2l1  |
| GO_BP_m3GO:005086regulation 5/539   | 263/23843 | 0.71207  | 0.822242 | 0.775843 | Exosc6/Igh  |
| GO_BP_m3GO:001982stem cell p 3/539  | 162/23843 | 0.712355 | 0.822242 | 0.775843 | Ctr9/Hes1/  |
| GO_BP_m3GO:005126protein tetı3/539  | 162/23843 | 0.712355 | 0.822242 | 0.775843 | Ccl5/Nlgn1  |
| GO_BP_m3GO:200124regulation 3/539   | 162/23843 | 0.712355 | 0.822242 | 0.775843 | Bag5/Bcl2l1 |
| GO_BP_m3GO:000858female gor 2/539   | 110/23843 | 0.714175 | 0.823679 | 0.777199 | Bcl2l1/Ptpr |

|                                     |           |          |          |          |             |
|-------------------------------------|-----------|----------|----------|----------|-------------|
| GO_BP_m3GO:005086negative re2/539   | 110/23843 | 0.714175 | 0.823679 | 0.777199 | Btn1a1/Ihh  |
| GO_BP_m3GO:009009negative re2/539   | 110/23843 | 0.714175 | 0.823679 | 0.777199 | Axin2/Sox1  |
| GO_BP_m3GO:000628nucleotide 1/539   | 55/23843  | 0.716077 | 0.823882 | 0.77739  | Oraov1      |
| GO_BP_m3GO:000672terpenoid r1/539   | 55/23843  | 0.716077 | 0.823882 | 0.77739  | Lcn5        |
| GO_BP_m3GO:003266regulation 1/539   | 55/23843  | 0.716077 | 0.823882 | 0.77739  | Carmil2     |
| GO_BP_m3GO:003527exocrine sy1/539   | 55/23843  | 0.716077 | 0.823882 | 0.77739  | Sox10       |
| GO_BP_m3GO:003808peptidyl-ty1/539   | 55/23843  | 0.716077 | 0.823882 | 0.77739  | Hck         |
| GO_BP_m3GO:004269ovulation c1/539   | 55/23843  | 0.716077 | 0.823882 | 0.77739  | Ptpn        |
| GO_BP_m3GO:004574negative re1/539   | 55/23843  | 0.716077 | 0.823882 | 0.77739  | Ccl5        |
| GO_BP_m3GO:004867response tr1/539   | 55/23843  | 0.716077 | 0.823882 | 0.77739  | Ptpf        |
| GO_BP_m3GO:00989Cregulation 1/539   | 55/23843  | 0.716077 | 0.823882 | 0.77739  | Tacr1       |
| GO_BP_m3GO:004441interspecie 8/539  | 412/23843 | 0.716619 | 0.824284 | 0.777769 | Bcl2l1/Ccl5 |
| GO_BP_m3GO:190406regulation 6/539   | 315/23843 | 0.719196 | 0.826827 | 0.780169 | Chrna4/Ha   |
| GO_BP_m3GO:00439Cregulation 4/539   | 215/23843 | 0.719215 | 0.826827 | 0.780169 | Ccl5/Ctdp1  |
| GO_BP_m3GO:000838RNA splicir 7/539  | 365/23843 | 0.721269 | 0.828028 | 0.781302 | Celf5/Ddx4  |
| GO_BP_m3GO:004639ribose pho 5/539   | 266/23843 | 0.72128  | 0.828028 | 0.781302 | Avp/Bcl2l1  |
| GO_BP_m3GO:007252purine-cor 5/539   | 266/23843 | 0.72128  | 0.828028 | 0.781302 | Avp/Bcl2l1  |
| GO_BP_m3GO:014001mitotic nuc 5/539  | 266/23843 | 0.72128  | 0.828028 | 0.781302 | Ctdp1/Mac   |
| GO_BP_m3GO:000175eye photor 1/539   | 56/23843  | 0.722511 | 0.828028 | 0.781302 | Ihh         |
| GO_BP_m3GO:000222innate immr 1/539  | 56/23843  | 0.722511 | 0.828028 | 0.781302 | Defa27      |
| GO_BP_m3GO:001081negative re1/539   | 56/23843  | 0.722511 | 0.828028 | 0.781302 | Plet1       |
| GO_BP_m3GO:00311Cneuron prc 1/539   | 56/23843  | 0.722511 | 0.828028 | 0.781302 | Ptpf        |
| GO_BP_m3GO:009039cellular sen1/539  | 56/23843  | 0.722511 | 0.828028 | 0.781302 | Twist1      |
| GO_BP_m3GO:001931hexose me 4/539    | 216/23843 | 0.722572 | 0.828028 | 0.781302 | Dlat/Hk1/P  |
| GO_BP_m3GO:005118cofactor bi 4/539  | 216/23843 | 0.722572 | 0.828028 | 0.781302 | Dlat/Dld/H  |
| GO_BP_m3GO:00516Cdefense re 4/539   | 216/23843 | 0.722572 | 0.828028 | 0.781302 | Ccl5/Irf1   |
| GO_BP_m3GO:003433adherens jt 2/539  | 112/23843 | 0.723426 | 0.828122 | 0.781391 | Cdh26/Gpr   |
| GO_BP_m3GO:004333response tr 2/539  | 112/23843 | 0.723426 | 0.828122 | 0.781391 | Gm13287/l   |
| GO_BP_m3GO:004581negative re 2/539  | 112/23843 | 0.723426 | 0.828122 | 0.781391 | Hypm/Uhrf   |
| GO_BP_m3GO:005082defense re 2/539   | 112/23843 | 0.723426 | 0.828122 | 0.781391 | Defa27/Tfe  |
| GO_BP_m3GO:190303regulation 3/539   | 165/23843 | 0.723908 | 0.828453 | 0.781703 | Foxc2/Myo   |
| GO_BP_m3GO:000606alcohol me 5/539   | 267/23843 | 0.724303 | 0.828684 | 0.781921 | Dhcr24/Fd   |
| GO_BP_m3GO:000705chromosor 6/539    | 317/23843 | 0.724779 | 0.829009 | 0.782227 | Ankle1/Axi  |
| GO_BP_m3GO:005118cofactor m 9/539   | 465/23843 | 0.727162 | 0.831438 | 0.78452  | Dlat/Dld/Fc |
| GO_BP_m3GO:007121cellular res 5/539 | 268/23843 | 0.727302 | 0.831438 | 0.78452  | Ccl5/Ctr9/l |
| GO_BP_m3GO:00439Cpositive re 3/539  | 166/23843 | 0.727678 | 0.831438 | 0.78452  | Ctdp1/Fam   |
| GO_BP_m3GO:009872maintenan 3/539    | 166/23843 | 0.727678 | 0.831438 | 0.78452  | Ctr9/Hes1/  |
| GO_BP_m3GO:004654developme 2/539    | 113/23843 | 0.727956 | 0.831534 | 0.784611 | Bcl2l1/Ptpn |
| GO_BP_m3GO:00456Cpositive re 1/539  | 57/23843  | 0.728798 | 0.832055 | 0.785101 | Bmp2        |
| GO_BP_m3GO:190342positive re 1/539  | 57/23843  | 0.728798 | 0.832055 | 0.785101 | Klf2        |
| GO_BP_m3GO:003166cellular res 4/539 | 218/23843 | 0.729198 | 0.832069 | 0.785115 | Lrrk2/Myoc  |
| GO_BP_m3GO:006102membrane 4/539     | 218/23843 | 0.729198 | 0.832069 | 0.785115 | Stx12/Syt4  |
| GO_BP_m3GO:00719Cregulation 8/539   | 418/23843 | 0.73127  | 0.834211 | 0.787137 | Bmp2/Grm    |
| GO_BP_m3GO:001081positive re 2/539  | 114/23843 | 0.732422 | 0.834911 | 0.787797 | Foxf1/Prkc  |
| GO_BP_m3GO:003497response tr 4/539  | 219/23843 | 0.732467 | 0.834911 | 0.787797 | Ankzf1/Lrrf |
| GO_BP_m3GO:003629response tr 4/539  | 219/23843 | 0.732467 | 0.834911 | 0.787797 | Bmp2/Chrr   |
| GO_BP_m3GO:007048response tr 5/539  | 270/23843 | 0.733231 | 0.83556  | 0.788409 | Bmp2/Chrr   |
| GO_BP_m3GO:000194heart loopi 1/539  | 58/23843  | 0.734944 | 0.83569  | 0.788532 | Ihh         |

|                                    |           |          |          |          |             |
|------------------------------------|-----------|----------|----------|----------|-------------|
| GO_BP_m3GO:004205T-helper c1/539   | 58/23843  | 0.734944 | 0.83569  | 0.788532 | Prkcz       |
| GO_BP_m3GO:004277mitochond1/539    | 58/23843  | 0.734944 | 0.83569  | 0.788532 | Dld         |
| GO_BP_m3GO:004685regulation 1/539  | 58/23843  | 0.734944 | 0.83569  | 0.788532 | S1pr1       |
| GO_BP_m3GO:005071negative re1/539  | 58/23843  | 0.734944 | 0.83569  | 0.788532 | Btn1a1      |
| GO_BP_m3GO:19023Cregulation 1/539  | 58/23843  | 0.734944 | 0.83569  | 0.788532 | Stoml1      |
| GO_BP_m3GO:19043Eregulation 1/539  | 58/23843  | 0.734944 | 0.83569  | 0.788532 | Gnl3l       |
| GO_BP_m3GO:004343negative re3/539  | 168/23843 | 0.735096 | 0.83569  | 0.788532 | Ptch1/Trib2 |
| GO_BP_m3GO:20012Epositive re3/539  | 168/23843 | 0.735096 | 0.83569  | 0.788532 | Ctr9/Jdp2/  |
| GO_BP_m3GO:005087positive re4/539  | 220/23843 | 0.735706 | 0.836162 | 0.788977 | Exosc6/Igh  |
| GO_BP_m3GO:001402primary ne2/539   | 115/23843 | 0.736827 | 0.837215 | 0.78997  | Ptch1/Twis  |
| GO_BP_m3GO:00070Espindle org3/539  | 169/23843 | 0.738745 | 0.838921 | 0.791581 | Ccdc155/C   |
| GO_BP_m3GO:003133negative re4/539  | 221/23843 | 0.738915 | 0.838921 | 0.791581 | Axin2/Bag5  |
| GO_BP_m3GO:00460EATP metab4/539    | 221/23843 | 0.738915 | 0.838921 | 0.791581 | Bcl2l1/Dld/ |
| GO_BP_m3GO:00022ECD4-positi1/539   | 59/23843  | 0.74095  | 0.839041 | 0.791694 | Prkcz       |
| GO_BP_m3GO:000243inflammatc1/539   | 59/23843  | 0.74095  | 0.839041 | 0.791694 | Ak7         |
| GO_BP_m3GO:00193Earachidonic1/539  | 59/23843  | 0.74095  | 0.839041 | 0.791694 | Cyp2c38     |
| GO_BP_m3GO:003133regulation 1/539  | 59/23843  | 0.74095  | 0.839041 | 0.791694 | Syt4        |
| GO_BP_m3GO:003267regulation 1/539  | 59/23843  | 0.74095  | 0.839041 | 0.791694 | Il17d       |
| GO_BP_m3GO:004612purine ribo1/539  | 59/23843  | 0.74095  | 0.839041 | 0.791694 | Lrrk2       |
| GO_BP_m3GO:00509Edetection c1/539  | 59/23843  | 0.74095  | 0.839041 | 0.791694 | Mkks        |
| GO_BP_m3GO:006032face develc1/539  | 59/23843  | 0.74095  | 0.839041 | 0.791694 | Mkks        |
| GO_BP_m3GO:190351mucopolys1/539    | 59/23843  | 0.74095  | 0.839041 | 0.791694 | Itih1       |
| GO_BP_m3GO:000854epidermis c6/539  | 323/23843 | 0.741062 | 0.839041 | 0.791694 | Hes1/Prkcf  |
| GO_BP_m3GO:000827regulation 2/539  | 116/23843 | 0.741169 | 0.839041 | 0.791694 | Ccl5/Lrrk2  |
| GO_BP_m3GO:19033Eregulation 4/539  | 222/23843 | 0.742094 | 0.839497 | 0.792124 | Bag5/Lrrk2  |
| GO_BP_m3GO:000664membrane 3/539    | 170/23843 | 0.742354 | 0.839497 | 0.792124 | Elovl2/Enp1 |
| GO_BP_m3GO:00069Ecompleme13/539    | 170/23843 | 0.742354 | 0.839497 | 0.792124 | Ighv1-53/Ig |
| GO_BP_m3GO:003004actin filame3/539 | 170/23843 | 0.742354 | 0.839497 | 0.792124 | Mkks/Carr   |
| GO_BP_m3GO:007182ribonucleo14/539  | 223/23843 | 0.745245 | 0.839905 | 0.792509 | Atxn2/Gcfc  |
| GO_BP_m3GO:00027Eimmune re8/539    | 424/23843 | 0.745401 | 0.839905 | 0.792509 | Btn1a1/Igh  |
| GO_BP_m3GO:00160Ecarbohydrc2/539   | 117/23843 | 0.74545  | 0.839905 | 0.792509 | Hk1/Ier3    |
| GO_BP_m3GO:004572positive re2/539  | 117/23843 | 0.74545  | 0.839905 | 0.792509 | Rps3a1/Uc   |
| GO_BP_m3GO:190211regulation 3/539  | 171/23843 | 0.745923 | 0.839905 | 0.792509 | Atxn2/Hck/  |
| GO_BP_m3GO:000151RNA methy1/539    | 60/23843  | 0.746821 | 0.839905 | 0.792509 | Trmo        |
| GO_BP_m3GO:00022Ealpha-beta1/539   | 60/23843  | 0.746821 | 0.839905 | 0.792509 | Prkcz       |
| GO_BP_m3GO:00027Cregulation 1/539  | 60/23843  | 0.746821 | 0.839905 | 0.792509 | Prkcz       |
| GO_BP_m3GO:00027Epositive re1/539  | 60/23843  | 0.746821 | 0.839905 | 0.792509 | Ccl5        |
| GO_BP_m3GO:000627RNA-depe1/539     | 60/23843  | 0.746821 | 0.839905 | 0.792509 | Gnl3l       |
| GO_BP_m3GO:00068Edrug transr1/539  | 60/23843  | 0.746821 | 0.839905 | 0.792509 | Slc25a17    |
| GO_BP_m3GO:00070Ctelomere n1/539   | 60/23843  | 0.746821 | 0.839905 | 0.792509 | Gnl3l       |
| GO_BP_m3GO:00075Elactation 1/539   | 60/23843  | 0.746821 | 0.839905 | 0.792509 | Ghrhr       |
| GO_BP_m3GO:00080Eaxo-dendri1/539   | 60/23843  | 0.746821 | 0.839905 | 0.792509 | Ap3s1       |
| GO_BP_m3GO:001061regulation 1/539  | 60/23843  | 0.746821 | 0.839905 | 0.792509 | Ctdp1       |
| GO_BP_m3GO:00303E DNA dama1/539    | 60/23843  | 0.746821 | 0.839905 | 0.792509 | Twist1      |
| GO_BP_m3GO:003292circadian r1/539  | 60/23843  | 0.746821 | 0.839905 | 0.792509 | Rai1        |
| GO_BP_m3GO:00343Eprotein loc1/539  | 60/23843  | 0.746821 | 0.839905 | 0.792509 | Gpm6b       |
| GO_BP_m3GO:00511Eregulation 1/539  | 60/23843  | 0.746821 | 0.839905 | 0.792509 | Ier3        |
| GO_BP_m3GO:00700Eintrinsic ap1/539 | 60/23843  | 0.746821 | 0.839905 | 0.792509 | Lrrk2       |

|                                      |           |          |          |          |             |
|--------------------------------------|-----------|----------|----------|----------|-------------|
| GO_BP_m3GO:200075regulation 1/539    | 60/23843  | 0.746821 | 0.839905 | 0.792509 | Twist1      |
| GO_BP_m3GO:00516C detection c9/539   | 474/23843 | 0.747333 | 0.84026  | 0.792844 | Car6/Foxf1  |
| GO_BP_m3GO:003514tube forma3/539     | 172/23843 | 0.749453 | 0.841127 | 0.793662 | Ptch1/Sdcc  |
| GO_BP_m3GO:007135cellular res 3/539  | 172/23843 | 0.749453 | 0.841127 | 0.793662 | Ccl5/Mir10  |
| GO_BP_m3GO:012003regulation 3/539    | 172/23843 | 0.749453 | 0.841127 | 0.793662 | Nlgn1/Carr  |
| GO_BP_m3GO:000193regulation 2/539    | 118/23843 | 0.749671 | 0.841127 | 0.793662 | Bmp2/Tgfb   |
| GO_BP_m3GO:004646membrane 2/539      | 118/23843 | 0.749671 | 0.841127 | 0.793662 | Elovl2/St6c |
| GO_BP_m3GO:005072positive re 2/539   | 118/23843 | 0.749671 | 0.841127 | 0.793662 | Ccl5/Il17d  |
| GO_BP_m3GO:006201negative re2/539    | 118/23843 | 0.749671 | 0.841127 | 0.793662 | Bmp2/Ier3   |
| GO_BP_m3GO:190303negative re2/539    | 118/23843 | 0.749671 | 0.841127 | 0.793662 | Btn1a1/lhh  |
| GO_BP_m3GO:00509C detection c7/539   | 377/23843 | 0.751392 | 0.842388 | 0.794851 | Car6/Mkks   |
| GO_BP_m3GO:000228alpha-beta1/539     | 61/23843  | 0.752559 | 0.842388 | 0.794851 | Prkcz       |
| GO_BP_m3GO:001083regulation 1/539    | 61/23843  | 0.752559 | 0.842388 | 0.794851 | Myod1       |
| GO_BP_m3GO:003163zymogen a1/539      | 61/23843  | 0.752559 | 0.842388 | 0.794851 | Dhcr24      |
| GO_BP_m3GO:004396histone H3 1/539    | 61/23843  | 0.752559 | 0.842388 | 0.794851 | Myod1       |
| GO_BP_m3GO:005159response tr1/539    | 61/23843  | 0.752559 | 0.842388 | 0.794851 | Fdx1        |
| GO_BP_m3GO:007126cellular res 1/539  | 61/23843  | 0.752559 | 0.842388 | 0.794851 | Mir194-2    |
| GO_BP_m3GO:19028C negative re1/539   | 61/23843  | 0.752559 | 0.842388 | 0.794851 | Susd2       |
| GO_BP_m3GO:190305negative re1/539    | 61/23843  | 0.752559 | 0.842388 | 0.794851 | Bag5        |
| GO_BP_m3GO:000703Golgi orga 2/539    | 119/23843 | 0.753831 | 0.843591 | 0.795987 | Bag5/Lrrk2  |
| GO_BP_m3GO:006049regulation 3/539    | 174/23843 | 0.756395 | 0.845799 | 0.798071 | Nlgn1/Carr  |
| GO_BP_m3GO:190352regulation 4/539    | 227/23843 | 0.757553 | 0.845799 | 0.798071 | Avp/Oxt/Ta  |
| GO_BP_m3GO:00034C neural retir1/539  | 62/23843  | 0.758167 | 0.845799 | 0.798071 | lhh         |
| GO_BP_m3GO:000924glycolipid k1/539   | 62/23843  | 0.758167 | 0.845799 | 0.798071 | St6galnac5  |
| GO_BP_m3GO:001474regulation 1/539    | 62/23843  | 0.758167 | 0.845799 | 0.798071 | Ctdp1       |
| GO_BP_m3GO:004205regulation 1/539    | 62/23843  | 0.758167 | 0.845799 | 0.798071 | Ptprf       |
| GO_BP_m3GO:004244pigment m1/539      | 62/23843  | 0.758167 | 0.845799 | 0.798071 | Trpc1       |
| GO_BP_m3GO:004277ATP synthe1/539     | 62/23843  | 0.758167 | 0.845799 | 0.798071 | Dld         |
| GO_BP_m3GO:004542regulation 1/539    | 62/23843  | 0.758167 | 0.845799 | 0.798071 | Klf2        |
| GO_BP_m3GO:005105positive re 1/539   | 62/23843  | 0.758167 | 0.845799 | 0.798071 | Cdon        |
| GO_BP_m3GO:190122positive re 1/539   | 62/23843  | 0.758167 | 0.845799 | 0.798071 | C1qtnf4     |
| GO_BP_m3GO:200024negative re1/539    | 62/23843  | 0.758167 | 0.845799 | 0.798071 | Adam24      |
| GO_BP_m3GO:007149cellular res 5/539  | 279/23843 | 0.758748 | 0.846228 | 0.798475 | Lrrk2/Mir19 |
| GO_BP_m3GO:009719extrinsic a 4/539   | 228/23843 | 0.760557 | 0.848025 | 0.800171 | Bcl2l1/Pdia |
| GO_BP_m3GO:007124cellular res 2/539  | 121/23843 | 0.761972 | 0.849382 | 0.801451 | Lrrk2/Nlgn  |
| GO_BP_m3GO:000081sister chr 3/539    | 176/23843 | 0.763181 | 0.849487 | 0.80155  | Axin2/Mad   |
| GO_BP_m3GO:200123positive re 3/539   | 176/23843 | 0.763181 | 0.849487 | 0.80155  | Pdia3/Tgfb  |
| GO_BP_m3GO:000931oligosacchi1/539    | 63/23843  | 0.763648 | 0.849487 | 0.80155  | St6galnac5  |
| GO_BP_m3GO:003262interleukin1/539    | 63/23843  | 0.763648 | 0.849487 | 0.80155  | Carmil2     |
| GO_BP_m3GO:00346C cellular res 1/539 | 63/23843  | 0.763648 | 0.849487 | 0.80155  | Hsf4        |
| GO_BP_m3GO:004227purine nuc 1/539    | 63/23843  | 0.763648 | 0.849487 | 0.80155  | Lrrk2       |
| GO_BP_m3GO:004396histone H4 1/539    | 63/23843  | 0.763648 | 0.849487 | 0.80155  | Myod1       |
| GO_BP_m3GO:19016C alpha-amir1/539    | 63/23843  | 0.763648 | 0.849487 | 0.80155  | Thns12      |
| GO_BP_m3GO:000916nucleotide 2/539    | 122/23843 | 0.765955 | 0.851832 | 0.803763 | Hk1/Ier3    |
| GO_BP_m3GO:009006positive re 4/539   | 230/23843 | 0.766479 | 0.852015 | 0.803936 | Mad211/Ne   |
| GO_BP_m3GO:004311receptor m3/539     | 177/23843 | 0.766516 | 0.852015 | 0.803936 | Atxn2/Lrrtr |
| GO_BP_m3GO:003261interleukin1/539    | 64/23843  | 0.769005 | 0.853457 | 0.805296 | Hk1         |
| GO_BP_m3GO:003263interleukin1/539    | 64/23843  | 0.769005 | 0.853457 | 0.805296 | Il17d       |

|                                    |           |          |          |          |             |
|------------------------------------|-----------|----------|----------|----------|-------------|
| GO_BP_m3GO:004827vesicle doc1/539  | 64/23843  | 0.769005 | 0.853457 | 0.805296 | Stx12       |
| GO_BP_m3GO:005076positive re1/539  | 64/23843  | 0.769005 | 0.853457 | 0.805296 | Abr         |
| GO_BP_m3GO:005178negative re1/539  | 64/23843  | 0.769005 | 0.853457 | 0.805296 | Mad211      |
| GO_BP_m3GO:006137determinat1/539   | 64/23843  | 0.769005 | 0.853457 | 0.805296 | Ihh         |
| GO_BP_m3GO:000181negative re4/539  | 231/23843 | 0.769397 | 0.853545 | 0.805379 | Btn1a1/Klf2 |
| GO_BP_m3GO:199077protein loc5/539  | 283/23843 | 0.769486 | 0.853545 | 0.805379 | Bcl2l1/Grin |
| GO_BP_m3GO:000736determinat2/539   | 123/23843 | 0.769879 | 0.853545 | 0.805379 | Foxf1/Ihh   |
| GO_BP_m3GO:000958detection c2/539  | 123/23843 | 0.769879 | 0.853545 | 0.805379 | Foxf1/Mkks  |
| GO_BP_m3GO:004586positive re8/539  | 436/23843 | 0.772093 | 0.85573  | 0.807441 | Axin2/Bmp   |
| GO_BP_m3GO:001003response tr4/539  | 232/23843 | 0.772286 | 0.85573  | 0.807441 | Kcnmb4/Lr   |
| GO_BP_m3GO:007252purine-cor9/539   | 486/23843 | 0.7726   | 0.85573  | 0.807441 | Avp/Bcl2l1  |
| GO_BP_m3GO:000703vacuolar tr2/539  | 124/23843 | 0.773746 | 0.85573  | 0.807441 | 2610002M    |
| GO_BP_m3GO:003021erythrocyte2/539  | 124/23843 | 0.773746 | 0.85573  | 0.807441 | Klf2/L3mbt  |
| GO_BP_m3GO:009755calcium ion2/539  | 124/23843 | 0.773746 | 0.85573  | 0.807441 | Grin2c/Trp  |
| GO_BP_m3GO:007037ERK1 and E6/539   | 336/23843 | 0.773945 | 0.85573  | 0.807441 | Avp/Bmp2    |
| GO_BP_m3GO:001049proteasom8/539    | 437/23843 | 0.774223 | 0.85573  | 0.807441 | Ankzf1/Bac  |
| GO_BP_m3GO:000253production1/539   | 65/23843  | 0.774241 | 0.85573  | 0.807441 | Il17d       |
| GO_BP_m3GO:000854visual learn1/539 | 65/23843  | 0.774241 | 0.85573  | 0.807441 | Sgk1        |
| GO_BP_m3GO:001050negative re1/539  | 65/23843  | 0.774241 | 0.85573  | 0.807441 | Lrrk2       |
| GO_BP_m3GO:005511regulation 1/539  | 65/23843  | 0.774241 | 0.85573  | 0.807441 | Ucn         |
| GO_BP_m3GO:004828organelle f3/539  | 180/23843 | 0.776293 | 0.857608 | 0.809213 | Stx12/Syt4  |
| GO_BP_m3GO:004206wound hea6/539    | 337/23843 | 0.77634  | 0.857608 | 0.809213 | Foxc2/Myo   |
| GO_BP_m3GO:000225activation c9/539 | 488/23843 | 0.77663  | 0.857708 | 0.809307 | Btn1a1/Cd   |
| GO_BP_m3GO:000681potassium 4/539   | 234/23843 | 0.777979 | 0.858514 | 0.810068 | Kcnh3/Kcnj  |
| GO_BP_m3GO:200011regulation 4/539  | 234/23843 | 0.777979 | 0.858514 | 0.810068 | 9230104L0   |
| GO_BP_m3GO:000154ovarian foll1/539 | 66/23843  | 0.779359 | 0.858514 | 0.810068 | Bcl2l1      |
| GO_BP_m3GO:000865cellular am1/539  | 66/23843  | 0.779359 | 0.858514 | 0.810068 | Thns12      |
| GO_BP_m3GO:003043ubiquitin-c1/539  | 66/23843  | 0.779359 | 0.858514 | 0.810068 | Ankzf1      |
| GO_BP_m3GO:003096endoplasm1/539    | 66/23843  | 0.779359 | 0.858514 | 0.810068 | Stc2        |
| GO_BP_m3GO:004340negative re1/539  | 66/23843  | 0.779359 | 0.858514 | 0.810068 | Ptpn5       |
| GO_BP_m3GO:006068regulation 1/539  | 66/23843  | 0.779359 | 0.858514 | 0.810068 | Lrrk2       |
| GO_BP_m3GO:190118regulation 1/539  | 66/23843  | 0.779359 | 0.858514 | 0.810068 | Ptprf       |
| GO_BP_m3GO:190179regulation 1/539  | 66/23843  | 0.779359 | 0.858514 | 0.810068 | Twist1      |
| GO_BP_m3GO:005095sensory pe5/539   | 287/23843 | 0.779856 | 0.858842 | 0.810377 | Mir106b/N   |
| GO_BP_m3GO:007121cellular res5/539 | 288/23843 | 0.782392 | 0.861413 | 0.812803 | Ccl5/Ctr9/L |
| GO_BP_m3GO:005105positive re4/539  | 236/23843 | 0.783559 | 0.861865 | 0.81323  | Areg/Exosc  |
| GO_BP_m3GO:000704cell-substr1/539  | 67/23843  | 0.784361 | 0.861865 | 0.81323  | Gpm6b       |
| GO_BP_m3GO:003265regulation 1/539  | 67/23843  | 0.784361 | 0.861865 | 0.81323  | Hk1         |
| GO_BP_m3GO:003410homotypic1/539    | 67/23843  | 0.784361 | 0.861865 | 0.81323  | Ccl5        |
| GO_BP_m3GO:004804focal adhe1/539   | 67/23843  | 0.784361 | 0.861865 | 0.81323  | Gpm6b       |
| GO_BP_m3GO:004814positive re1/539  | 67/23843  | 0.784361 | 0.861865 | 0.81323  | Rps3a1      |
| GO_BP_m3GO:190589regulation 1/539  | 67/23843  | 0.784361 | 0.861865 | 0.81323  | Lrrk2       |
| GO_BP_m3GO:004308regulation 5/539  | 289/23843 | 0.784905 | 0.861865 | 0.81323  | Ccl5/Lrrk2/ |
| GO_BP_m3GO:000270positive re2/539  | 127/23843 | 0.785009 | 0.861865 | 0.81323  | Exosc6/Prk  |
| GO_BP_m3GO:003502regulation 2/539  | 127/23843 | 0.785009 | 0.861865 | 0.81323  | Abr/Scai    |
| GO_BP_m3GO:009030nucleic acid2/539 | 127/23843 | 0.785009 | 0.861865 | 0.81323  | Dnase1l3/l: |
| GO_BP_m3GO:004354endothelial3/539  | 183/23843 | 0.785731 | 0.862188 | 0.813534 | Foxc2/Rhol  |
| GO_BP_m3GO:005122negative re3/539  | 183/23843 | 0.785731 | 0.862188 | 0.813534 | Btn1a1/Lrrl |



|                   |              |       |           |          |          |          |             |
|-------------------|--------------|-------|-----------|----------|----------|----------|-------------|
| GO_BP_m3GO:000206 | epithelial c | 4/539 | 237/23843 | 0.786307 | 0.862188 | 0.813534 | Cryaa/Foxc  |
| GO_BP_m3GO:003241 | regulation   | 4/539 | 237/23843 | 0.786307 | 0.862188 | 0.813534 | Chrna4/Hk   |
| GO_BP_m3GO:005140 | stress-activ | 4/539 | 237/23843 | 0.786307 | 0.862188 | 0.813534 | Bmp2/Dixc   |
| GO_BP_m3GO:004576 | regulation   | 5/539 | 290/23843 | 0.787396 | 0.86299  | 0.814291 | Adm2/Ccl5   |
| GO_BP_m3GO:000661 | protein exp  | 2/539 | 128/23843 | 0.788653 | 0.86299  | 0.814291 | Ankle1/Nxt  |
| GO_BP_m3GO:003596 | response tr  | 2/539 | 128/23843 | 0.788653 | 0.86299  | 0.814291 | Ankzf1/Stc  |
| GO_BP_m3GO:007145 | cellular res | 2/539 | 128/23843 | 0.788653 | 0.86299  | 0.814291 | Myod1/Tw    |
| GO_BP_m3GO:000245 | humoral in   | 3/539 | 184/23843 | 0.788803 | 0.86299  | 0.814291 | Ighv1-53/I  |
| GO_BP_m3GO:000763 | visual beha  | 1/539 | 68/23843  | 0.789249 | 0.86299  | 0.814291 | Sgk1        |
| GO_BP_m3GO:003241 | negative re  | 1/539 | 68/23843  | 0.789249 | 0.86299  | 0.814291 | Stoml1      |
| GO_BP_m3GO:007037 | negative re  | 1/539 | 68/23843  | 0.789249 | 0.86299  | 0.814291 | Dusp26      |
| GO_BP_m3GO:014005 | organelle l  | 1/539 | 68/23843  | 0.789249 | 0.86299  | 0.814291 | Stx12       |
| GO_BP_m3GO:190198 | regulation   | 1/539 | 68/23843  | 0.789249 | 0.86299  | 0.814291 | Twist1      |
| GO_BP_m3GO:190442 | positive re  | 1/539 | 68/23843  | 0.789249 | 0.86299  | 0.814291 | Trpc1       |
| GO_BP_m3GO:004578 | positive re  | 6/539 | 343/23843 | 0.79031  | 0.86393  | 0.815178 | Hes1/Mad    |
| GO_BP_m3GO:003432 | cell junctio | 3/539 | 185/23843 | 0.791839 | 0.864941 | 0.816132 | Cdh26/Gpr   |
| GO_BP_m3GO:000184 | neural tub   | 2/539 | 129/23843 | 0.792242 | 0.864941 | 0.816132 | Ptch1/Twis  |
| GO_BP_m3GO:004867 | axon exten   | 2/539 | 129/23843 | 0.792242 | 0.864941 | 0.816132 | Nkx6-1/Ra   |
| GO_BP_m3GO:005083 | defense re   | 2/539 | 129/23843 | 0.792242 | 0.864941 | 0.816132 | Defa27/Hcl  |
| GO_BP_m3GO:009753 | granulocyti  | 2/539 | 129/23843 | 0.792242 | 0.864941 | 0.816132 | Ccl5/Prtn3  |
| GO_BP_m3GO:000608 | cellular ald | 1/539 | 69/23843  | 0.794027 | 0.86623  | 0.817348 | Bmp2        |
| GO_BP_m3GO:005081 | regulation   | 1/539 | 69/23843  | 0.794027 | 0.86623  | 0.817348 | Bmp2        |
| GO_BP_m3GO:005115 | positive re  | 1/539 | 69/23843  | 0.794027 | 0.86623  | 0.817348 | Myod1       |
| GO_BP_m3GO:003350 | carbohydr    | 4/539 | 241/23843 | 0.797022 | 0.869056 | 0.820015 | Hk1/Ptch1/  |
| GO_BP_m3GO:004253 | glucose ho   | 4/539 | 241/23843 | 0.797022 | 0.869056 | 0.820015 | Hk1/Ptch1/  |
| GO_BP_m3GO:000020 | protein pol  | 3/539 | 187/23843 | 0.797801 | 0.869243 | 0.820191 | Rnf144b/Tr  |
| GO_BP_m3GO:000600 | glucose m    | 3/539 | 187/23843 | 0.797801 | 0.869243 | 0.820191 | Dlat/Hk1/T  |
| GO_BP_m3GO:190495 | negative re  | 3/539 | 187/23843 | 0.797801 | 0.869243 | 0.820191 | Btn1a1/Lrrl |
| GO_BP_m3GO:000680 | nitric oxide | 1/539 | 70/23843  | 0.798697 | 0.869288 | 0.820233 | Klf2        |
| GO_BP_m3GO:000742 | peripheral   | 1/539 | 70/23843  | 0.798697 | 0.869288 | 0.820233 | Sox10       |
| GO_BP_m3GO:000749 | endoderm     | 1/539 | 70/23843  | 0.798697 | 0.869288 | 0.820233 | Ctr9        |
| GO_BP_m3GO:003241 | lysosome l   | 1/539 | 70/23843  | 0.798697 | 0.869288 | 0.820233 | Foxf1       |
| GO_BP_m3GO:004440 | symbiont p   | 6/539 | 347/23843 | 0.799248 | 0.869288 | 0.820233 | Bcl2l1/Ccl5 |
| GO_BP_m3GO:004230 | molting cyc  | 2/539 | 131/23843 | 0.799259 | 0.869288 | 0.820233 | Krt83/Prss8 |
| GO_BP_m3GO:004263 | hair cycle   | 2/539 | 131/23843 | 0.799259 | 0.869288 | 0.820233 | Krt83/Prss8 |
| GO_BP_m3GO:007037 | positive re  | 4/539 | 242/23843 | 0.799633 | 0.869474 | 0.820409 | Bmp2/Ccl5   |
| GO_BP_m3GO:000725 | JNK casc     | 3/539 | 188/23843 | 0.800728 | 0.869784 | 0.820702 | Dixdc1/Gril |
| GO_BP_m3GO:002191 | neural tub   | 3/539 | 188/23843 | 0.800728 | 0.869784 | 0.820702 | Hes1/Ptch1  |
| GO_BP_m3GO:003461 | response tr  | 3/539 | 188/23843 | 0.800728 | 0.869784 | 0.820702 | Ccl5/Mir10  |
| GO_BP_m3GO:004643 | organophc    | 3/539 | 188/23843 | 0.800728 | 0.869784 | 0.820702 | Enpp7/Hk1   |
| GO_BP_m3GO:000193 | endothelial  | 2/539 | 132/23843 | 0.802688 | 0.871163 | 0.822003 | Bmp2/Tgfb   |
| GO_BP_m3GO:000985 | determinat   | 2/539 | 132/23843 | 0.802688 | 0.871163 | 0.822003 | Foxf1/Ihh   |
| GO_BP_m3GO:006104 | regulation   | 2/539 | 132/23843 | 0.802688 | 0.871163 | 0.822003 | Foxc2/Myo   |
| GO_BP_m3GO:190336 | negative re  | 1/539 | 71/23843  | 0.803261 | 0.871163 | 0.822003 | Bag5        |
| GO_BP_m3GO:000640 | RNA localiz  | 3/539 | 189/23843 | 0.80362  | 0.871163 | 0.822003 | Mcm3ap/N    |
| GO_BP_m3GO:000716 | cell-matrix  | 3/539 | 189/23843 | 0.80362  | 0.871163 | 0.822003 | Gpm6b/Plc   |
| GO_BP_m3GO:007180 | cellular pot | 3/539 | 189/23843 | 0.80362  | 0.871163 | 0.822003 | Kcnh3/Kcnj  |
| GO_BP_m3GO:007180 | potassium    | 3/539 | 189/23843 | 0.80362  | 0.871163 | 0.822003 | Kcnh3/Kcnj  |

|                   |                     |           |          |          |          |             |
|-------------------|---------------------|-----------|----------|----------|----------|-------------|
| GO_BP_m3GO:003033 | negative re4/539    | 244/23843 | 0.804772 | 0.872192 | 0.822973 | Abr/Gpr17:  |
| GO_BP_m3GO:000626 | DNA-depe2/539       | 133/23843 | 0.806065 | 0.872932 | 0.823672 | Mgme1/Mi    |
| GO_BP_m3GO:000979 | specificatio2/539   | 133/23843 | 0.806065 | 0.872932 | 0.823672 | Foxf1/Ihh   |
| GO_BP_m3GO:005070 | negative re2/539    | 133/23843 | 0.806065 | 0.872932 | 0.823672 | Btn1a1/Syt  |
| GO_BP_m3GO:004484 | cell cycle G3/539   | 190/23843 | 0.806476 | 0.872986 | 0.823723 | Ranbp3l/Su  |
| GO_BP_m3GO:007190 | positive reç5/539   | 298/23843 | 0.806521 | 0.872986 | 0.823723 | Bmp2/Grm    |
| GO_BP_m3GO:000206 | columnar/c1/539     | 72/23843  | 0.807722 | 0.873625 | 0.824326 | Whrn        |
| GO_BP_m3GO:004214 | retrograde 1/539    | 72/23843  | 0.807722 | 0.873625 | 0.824326 | Lrrk2       |
| GO_BP_m3GO:006107 | chaperone 1/539     | 72/23843  | 0.807722 | 0.873625 | 0.824326 | Mkks        |
| GO_BP_m3GO:001905 | viral life cyc3/539 | 191/23843 | 0.809297 | 0.874989 | 0.825613 | Ccl5/Isg20, |
| GO_BP_m3GO:190129 | nucleoside 2/539    | 134/23843 | 0.809391 | 0.874989 | 0.825613 | Hk1/Ier3    |
| GO_BP_m3GO:000191 | regulation 1/539    | 73/23843  | 0.812082 | 0.876544 | 0.82708  | Dnase1l3    |
| GO_BP_m3GO:001083 | telomere nr1/539    | 73/23843  | 0.812082 | 0.876544 | 0.82708  | Gnl3l       |
| GO_BP_m3GO:002240 | membrane 1/539      | 73/23843  | 0.812082 | 0.876544 | 0.82708  | Stx12       |
| GO_BP_m3GO:004620 | nitric oxide 1/539  | 73/23843  | 0.812082 | 0.876544 | 0.82708  | Klf2        |
| GO_BP_m3GO:004632 | regulation 1/539    | 73/23843  | 0.812082 | 0.876544 | 0.82708  | Prkcz       |
| GO_BP_m3GO:006096 | regulation 1/539    | 73/23843  | 0.812082 | 0.876544 | 0.82708  | Uhrf1       |
| GO_BP_m3GO:000916 | purine ribo4/539    | 247/23843 | 0.81228  | 0.876544 | 0.82708  | Bcl2l1/Dld/ |
| GO_BP_m3GO:003410 | erythrocyte2/539    | 135/23843 | 0.812665 | 0.876544 | 0.82708  | Klf2/L3mbt  |
| GO_BP_m3GO:005092 | positive reç2/539   | 135/23843 | 0.812665 | 0.876544 | 0.82708  | Ccl5/S1pr1  |
| GO_BP_m3GO:000912 | purine nuc4/539     | 248/23843 | 0.814729 | 0.877865 | 0.828327 | Bcl2l1/Dld/ |
| GO_BP_m3GO:000726 | Rho protei3/539     | 193/23843 | 0.814836 | 0.877865 | 0.828327 | Abr/Rhob/:  |
| GO_BP_m3GO:000686 | amino acid2/539     | 136/23843 | 0.81589  | 0.877865 | 0.828327 | Avp/Syt4    |
| GO_BP_m3GO:003425 | positive reç2/539   | 136/23843 | 0.81589  | 0.877865 | 0.828327 | Rps3a1/Uc   |
| GO_BP_m3GO:007233 | signal tranç2/539   | 136/23843 | 0.81589  | 0.877865 | 0.828327 | Twist1/Ww   |
| GO_BP_m3GO:005254 | regulation 7/539    | 407/23843 | 0.816333 | 0.877865 | 0.828327 | 9230104L0   |
| GO_BP_m3GO:000862 | extrinsic aç1/539   | 74/23843  | 0.816343 | 0.877865 | 0.828327 | Bcl2l1      |
| GO_BP_m3GO:001973 | antibacteri1/539    | 74/23843  | 0.816343 | 0.877865 | 0.828327 | Defa27      |
| GO_BP_m3GO:003246 | regulation 1/539    | 74/23843  | 0.816343 | 0.877865 | 0.828327 | Bcl2l1      |
| GO_BP_m3GO:003250 | maintenan1/539      | 74/23843  | 0.816343 | 0.877865 | 0.828327 | Hk1         |
| GO_BP_m3GO:003272 | positive reç1/539   | 74/23843  | 0.816343 | 0.877865 | 0.828327 | Carmil2     |
| GO_BP_m3GO:007167 | mononucle1/539      | 74/23843  | 0.816343 | 0.877865 | 0.828327 | Ccl5        |
| GO_BP_m3GO:003459 | cellular res4/539   | 249/23843 | 0.817152 | 0.878516 | 0.828941 | Ankzf1/Baç  |
| GO_BP_m3GO:190595 | regulation 2/539    | 137/23843 | 0.819064 | 0.880351 | 0.830672 | Oxt/Ptch1   |
| GO_BP_m3GO:000689 | receptor-nr3/539    | 195/23843 | 0.820238 | 0.88102  | 0.831304 | Atxn2/Lrrtr |
| GO_BP_m3GO:000672 | isoprenoid 1/539    | 75/23843  | 0.820507 | 0.88102  | 0.831304 | Lcn5        |
| GO_BP_m3GO:007134 | cellular res1/539   | 75/23843  | 0.820507 | 0.88102  | 0.831304 | Ccl5        |
| GO_BP_m3GO:009887 | vesicle-me1/539     | 75/23843  | 0.820507 | 0.88102  | 0.831304 | Exoc1       |
| GO_BP_m3GO:000916 | ribonucleo:4/539    | 251/23843 | 0.821921 | 0.881945 | 0.832176 | Bcl2l1/Dld/ |
| GO_BP_m3GO:000167 | cellular glu2/539   | 138/23843 | 0.82219  | 0.881945 | 0.832176 | Hk1/Ptprn   |
| GO_BP_m3GO:000268 | positive reç2/539   | 138/23843 | 0.82219  | 0.881945 | 0.832176 | Ccl5/Tacr1  |
| GO_BP_m3GO:000729 | female gan2/539     | 138/23843 | 0.82219  | 0.881945 | 0.832176 | Ccdc155/Ih  |
| GO_BP_m3GO:003166 | response tr6/539    | 359/23843 | 0.8243   | 0.883183 | 0.833344 | Lrrk2/Mkks  |
| GO_BP_m3GO:000649 | protein O- 1/539    | 76/23843  | 0.824578 | 0.883183 | 0.833344 | B3gnt6      |
| GO_BP_m3GO:000697 | response tr1/539    | 76/23843  | 0.824578 | 0.883183 | 0.833344 | Tsc22d3     |
| GO_BP_m3GO:000704 | cell-substr1/539    | 76/23843  | 0.824578 | 0.883183 | 0.833344 | Gpm6b       |
| GO_BP_m3GO:003433 | adherens jt1/539    | 76/23843  | 0.824578 | 0.883183 | 0.833344 | Gpm6b       |
| GO_BP_m3GO:005127 | regulation 1/539    | 76/23843  | 0.824578 | 0.883183 | 0.833344 | Trpc1       |

|                                      |           |          |          |          |             |
|--------------------------------------|-----------|----------|----------|----------|-------------|
| GO_BP_m3GO:00019Ccell killing 2/539  | 139/23843 | 0.825267 | 0.88326  | 0.833417 | Dnase1l3/t  |
| GO_BP_m3GO:00076Cvisual percept2/539 | 139/23843 | 0.825267 | 0.88326  | 0.833417 | Hsf4/Nxn12  |
| GO_BP_m3GO:001657histone acetyl2/539 | 139/23843 | 0.825267 | 0.88326  | 0.833417 | Myod1/Tw    |
| GO_BP_m3GO:00329Eprotein-co 3/539    | 198/23843 | 0.828089 | 0.885236 | 0.835282 | Ckap2/Car1  |
| GO_BP_m3GO:00518Eregulation 2/539    | 140/23843 | 0.828296 | 0.885236 | 0.835282 | Otud3/Tgfl  |
| GO_BP_m3GO:000911ribonucleo:1/539    | 77/23843  | 0.828556 | 0.885236 | 0.835282 | Lrrk2       |
| GO_BP_m3GO:00331C mitochondr1/539    | 77/23843  | 0.828556 | 0.885236 | 0.835282 | Bcs1l       |
| GO_BP_m3GO:003577insulin secr1/539   | 77/23843  | 0.828556 | 0.885236 | 0.835282 | Ptpn        |
| GO_BP_m3GO:004227ribosomal :1/539    | 77/23843  | 0.828556 | 0.885236 | 0.835282 | Nol10       |
| GO_BP_m3GO:006097coronary v:1/539    | 77/23843  | 0.828556 | 0.885236 | 0.835282 | Tgfbr1      |
| GO_BP_m3GO:00081Eactin polyn3/539    | 199/23843 | 0.83064  | 0.887041 | 0.836985 | Mkks/Carr   |
| GO_BP_m3GO:00902Eregulation 4/539    | 255/23843 | 0.831151 | 0.887041 | 0.836985 | Gdf5/Hes1   |
| GO_BP_m3GO:00421Eneurotrans 2/539    | 141/23843 | 0.831278 | 0.887041 | 0.836985 | Gcsh/Klf2   |
| GO_BP_m3GO:00427Edrug catab2/539     | 141/23843 | 0.831278 | 0.887041 | 0.836985 | Cyp2c38/G   |
| GO_BP_m3GO:00512Enegative re2/539    | 141/23843 | 0.831278 | 0.887041 | 0.836985 | Btn1a1/lhh  |
| GO_BP_m3GO:00022Elymphocyt1/539      | 78/23843  | 0.832444 | 0.887624 | 0.837535 | Tsc22d3     |
| GO_BP_m3GO:00465Ephotorecep1/539     | 78/23843  | 0.832444 | 0.887624 | 0.837535 | lhh         |
| GO_BP_m3GO:20010Ereactive nit1/539   | 78/23843  | 0.832444 | 0.887624 | 0.837535 | Klf2        |
| GO_BP_m3GO:00027Enegative re2/539    | 142/23843 | 0.834213 | 0.889069 | 0.838898 | Btn1a1/Syt  |
| GO_BP_m3GO:00714Ecellular res2/539   | 142/23843 | 0.834213 | 0.889069 | 0.838898 | Cyp2c38/U   |
| GO_BP_m3GO:003261interleukin:1/539   | 79/23843  | 0.836245 | 0.89035  | 0.840107 | Hk1         |
| GO_BP_m3GO:00345C protein loc1/539   | 79/23843  | 0.836245 | 0.89035  | 0.840107 | Gnl3l       |
| GO_BP_m3GO:004327response tr1/539    | 79/23843  | 0.836245 | 0.89035  | 0.840107 | Bcl2l1      |
| GO_BP_m3GO:004852positive re1/539    | 79/23843  | 0.836245 | 0.89035  | 0.840107 | Ctdp1       |
| GO_BP_m3GO:003134positive re5/539    | 312/23843 | 0.836681 | 0.890594 | 0.840337 | Ccl5/Il17d/ |
| GO_BP_m3GO:200014negative re4/539    | 258/23843 | 0.837809 | 0.891574 | 0.841262 | Abr/Gpr17:  |
| GO_BP_m3GO:00726Eprotein loc 8/539   | 472/23843 | 0.83988  | 0.893197 | 0.842794 | Bcl2l1/Grik |
| GO_BP_m3GO:00604C calcium ion2/539   | 144/23843 | 0.839946 | 0.893197 | 0.842794 | Grin2c/Trp  |
| GO_BP_m3GO:00070C plasma me1/539     | 80/23843  | 0.839959 | 0.893197 | 0.842794 | Pacsin3     |
| GO_BP_m3GO:00105Eregulation 2/539    | 145/23843 | 0.842744 | 0.895673 | 0.84513  | Foxc2/Rhol  |
| GO_BP_m3GO:00160Ecarbohydr2/539      | 204/23843 | 0.842913 | 0.895673 | 0.84513  | B3gnt6/Phl  |
| GO_BP_m3GO:00432Eregulation 3/539    | 204/23843 | 0.842913 | 0.895673 | 0.84513  | Avp/Cryaa/  |
| GO_BP_m3GO:00019Epositive re1/539    | 81/23843  | 0.843589 | 0.895948 | 0.84539  | Bmp2        |
| GO_BP_m3GO:00322C regulation 1/539   | 81/23843  | 0.843589 | 0.895948 | 0.84539  | Gnl3l       |
| GO_BP_m3GO:000912nucleoside 4/539    | 261/23843 | 0.844247 | 0.896425 | 0.84584  | Bcl2l1/Dld/ |
| GO_BP_m3GO:190134regulation 5/539    | 316/23843 | 0.844557 | 0.896533 | 0.845942 | Adm2/Ccl5   |
| GO_BP_m3GO:00353C regulation 1/539   | 82/23843  | 0.847137 | 0.898827 | 0.848106 | Dusp26      |
| GO_BP_m3GO:00723E intrinsic ap1/539  | 82/23843  | 0.847137 | 0.898827 | 0.848106 | Wwox        |
| GO_BP_m3GO:000007mitotic sist:2/539  | 147/23843 | 0.848208 | 0.899698 | 0.848928 | Mad2l1/Ut   |
| GO_BP_m3GO:007037regulation 5/539    | 318/23843 | 0.848377 | 0.899698 | 0.848928 | Bmp2/Ccl5   |
| GO_BP_m3GO:003462cellular res1/539   | 83/23843  | 0.850604 | 0.901171 | 0.850317 | Stc2        |
| GO_BP_m3GO:00468Epositive re1/539    | 83/23843  | 0.850604 | 0.901171 | 0.850317 | Avp         |
| GO_BP_m3GO:005114positive re1/539    | 83/23843  | 0.850604 | 0.901171 | 0.850317 | Myod1       |
| GO_BP_m3GO:005501cardiac mu1/539     | 83/23843  | 0.850604 | 0.901171 | 0.850317 | Ctdp1       |
| GO_BP_m3GO:00458Enegative re1/539    | 84/23843  | 0.853994 | 0.904086 | 0.853068 | Bmp2        |
| GO_BP_m3GO:014002exocytic pr1/539    | 84/23843  | 0.853994 | 0.904086 | 0.853068 | Nlgn1       |
| GO_BP_m3GO:00106Eregulation 3/539    | 209/23843 | 0.854409 | 0.904086 | 0.853068 | Foxc2/Rhol  |
| GO_BP_m3GO:003287regulation 3/539    | 209/23843 | 0.854409 | 0.904086 | 0.853068 | Bmp2/Dixc   |

|                   |              |       |           |          |          |          |             |
|-------------------|--------------|-------|-----------|----------|----------|----------|-------------|
| GO_BP_m3GO:003476 | positive reg | 3/539 | 209/23843 | 0.854409 | 0.904086 | 0.853068 | Gip/Prkcz/  |
| GO_BP_m3GO:003287 | positive reg | 2/539 | 150/23843 | 0.856081 | 0.90559  | 0.854487 | Bmp2/Dixc   |
| GO_BP_m3GO:005105 | regulation   | 4/539 | 267/23843 | 0.856478 | 0.90559  | 0.854487 | Abr/Arhga   |
| GO_BP_m3GO:007030 | regulation   | 3/539 | 210/23843 | 0.856618 | 0.90559  | 0.854487 | Bmp2/Dixc   |
| GO_BP_m3GO:004277 | signal trans | 1/539 | 85/23843  | 0.857306 | 0.90559  | 0.854487 | Twist1      |
| GO_BP_m3GO:004350 | regulation   | 1/539 | 85/23843  | 0.857306 | 0.90559  | 0.854487 | Ctdp1       |
| GO_BP_m3GO:004352 | regulation   | 1/539 | 85/23843  | 0.857306 | 0.90559  | 0.854487 | Foxc2       |
| GO_BP_m3GO:006184 | antimicrob   | 1/539 | 85/23843  | 0.857306 | 0.90559  | 0.854487 | Defa27      |
| GO_BP_m3GO:000183 | embryonic    | 2/539 | 151/23843 | 0.858622 | 0.906497 | 0.855343 | Ptch1/Twis  |
| GO_BP_m3GO:007030 | positive reg | 2/539 | 151/23843 | 0.858622 | 0.906497 | 0.855343 | Bmp2/Dixc   |
| GO_BP_m3GO:003227 | regulation   | 3/539 | 211/23843 | 0.858798 | 0.906497 | 0.855343 | Mkks/Carr   |
| GO_BP_m3GO:000611 | oxidative p  | 1/539 | 86/23843  | 0.860543 | 0.908116 | 0.856871 | Dld         |
| GO_BP_m3GO:000926 | cellular res | 2/539 | 152/23843 | 0.861121 | 0.908503 | 0.857236 | Lrrk2/Myoc  |
| GO_BP_m3GO:003109 | stress-activ | 4/539 | 270/23843 | 0.862282 | 0.909504 | 0.858181 | Bmp2/Dixc   |
| GO_BP_m3GO:004354 | positive reg | 3/539 | 213/23843 | 0.86307  | 0.90989  | 0.858545 | Ccl5/Prtn3/ |
| GO_BP_m3GO:004689 | regulation   | 2/539 | 153/23843 | 0.86358  | 0.90989  | 0.858545 | Avp/Bmp2    |
| GO_BP_m3GO:000269 | positive reg | 1/539 | 87/23843  | 0.863707 | 0.90989  | 0.858545 | Ccl5        |
| GO_BP_m3GO:000689 | post-Golgi   | 1/539 | 87/23843  | 0.863707 | 0.90989  | 0.858545 | Exoc1       |
| GO_BP_m3GO:003252 | response tr  | 1/539 | 87/23843  | 0.863707 | 0.90989  | 0.858545 | Halr1       |
| GO_BP_m3GO:003059 | neutrophil   | 1/539 | 88/23843  | 0.8668   | 0.911806 | 0.860352 | Ccl5        |
| GO_BP_m3GO:003134 | regulation   | 1/539 | 88/23843  | 0.8668   | 0.911806 | 0.860352 | Dnase1l3    |
| GO_BP_m3GO:007177 | response tr  | 1/539 | 88/23843  | 0.8668   | 0.911806 | 0.860352 | Ier2        |
| GO_BP_m3GO:190122 | regulation   | 1/539 | 88/23843  | 0.8668   | 0.911806 | 0.860352 | C1qtnf4     |
| GO_BP_m3GO:190260 | proton trar  | 1/539 | 88/23843  | 0.8668   | 0.911806 | 0.860352 | Twist1      |
| GO_BP_m3GO:190342 | regulation   | 1/539 | 88/23843  | 0.8668   | 0.911806 | 0.860352 | Klf2        |
| GO_BP_m3GO:190161 | organic hydr | 7/539 | 437/23843 | 0.867305 | 0.912114 | 0.860644 | Bmp2/Dhcr   |
| GO_BP_m3GO:000657 | cellular mo  | 2/539 | 155/23843 | 0.868379 | 0.912573 | 0.861076 | Gdap1l1/G   |
| GO_BP_m3GO:003104 | gene silenc  | 2/539 | 155/23843 | 0.868379 | 0.912573 | 0.861076 | Mov10l1/P   |
| GO_BP_m3GO:005082 | protein sta  | 2/539 | 155/23843 | 0.868379 | 0.912573 | 0.861076 | Otud3/Stx1  |
| GO_BP_m3GO:000330 | cardiac mu   | 1/539 | 89/23843  | 0.869822 | 0.91275  | 0.861243 | Ctdp1       |
| GO_BP_m3GO:000666 | glycolipid r | 1/539 | 89/23843  | 0.869822 | 0.91275  | 0.861243 | St6galnac5  |
| GO_BP_m3GO:000758 | response tr  | 1/539 | 89/23843  | 0.869822 | 0.91275  | 0.861243 | Pdia3       |
| GO_BP_m3GO:005500 | cardiac cell | 1/539 | 89/23843  | 0.869822 | 0.91275  | 0.861243 | Ctdp1       |
| GO_BP_m3GO:005507 | iron ion ho  | 1/539 | 89/23843  | 0.869822 | 0.91275  | 0.861243 | Hamp2       |
| GO_BP_m3GO:007055 | response tr  | 1/539 | 89/23843  | 0.869822 | 0.91275  | 0.861243 | Ccl5        |
| GO_BP_m3GO:003253 | regulation   | 6/539 | 385/23843 | 0.870045 | 0.912761 | 0.861254 | Mkks/Nkx6   |
| GO_BP_m3GO:006040 | cytosolic c  | 2/539 | 156/23843 | 0.870719 | 0.913245 | 0.861711 | Grin2c/Trp  |
| GO_BP_m3GO:007121 | cellular res | 4/539 | 275/23843 | 0.871509 | 0.913395 | 0.861851 | Bcl2l1/Kdrr |
| GO_BP_m3GO:010400 | cellular res | 4/539 | 275/23843 | 0.871509 | 0.913395 | 0.861851 | Bcl2l1/Kdrr |
| GO_BP_m3GO:000999 | response tr  | 6/539 | 386/23843 | 0.871587 | 0.913395 | 0.861851 | Lrrk2/Mkks  |
| GO_BP_m3GO:000202 | regulation   | 1/539 | 90/23843  | 0.872776 | 0.913395 | 0.861851 | Oxt         |
| GO_BP_m3GO:004668 | response tr  | 1/539 | 90/23843  | 0.872776 | 0.913395 | 0.861851 | Fdx1        |
| GO_BP_m3GO:005084 | regulation   | 1/539 | 90/23843  | 0.872776 | 0.913395 | 0.861851 | Lrrk2       |
| GO_BP_m3GO:005189 | positive reg | 1/539 | 90/23843  | 0.872776 | 0.913395 | 0.861851 | Tgfbr1      |
| GO_BP_m3GO:007145 | cellular res | 1/539 | 90/23843  | 0.872776 | 0.913395 | 0.861851 | Twist1      |
| GO_BP_m3GO:190350 | liposacchar  | 1/539 | 90/23843  | 0.872776 | 0.913395 | 0.861851 | St6galnac5  |
| GO_BP_m3GO:004274 | defense re   | 7/539 | 442/23843 | 0.874558 | 0.915037 | 0.863401 | Defa27/Ha   |
| GO_BP_m3GO:001645 | gene silenc  | 4/539 | 277/23843 | 0.875048 | 0.91513  | 0.863489 | Hypm/Mov    |

|                                     |           |          |          |          |             |
|-------------------------------------|-----------|----------|----------|----------|-------------|
| GO_BP_m3GO:000926response tr2/539   | 158/23843 | 0.875286 | 0.91513  | 0.863489 | Hsf4/Tacr1  |
| GO_BP_m3GO:007217epithelial tr2/539 | 158/23843 | 0.875286 | 0.91513  | 0.863489 | Ptch1/Twis  |
| GO_BP_m3GO:003656ERAD path1/539     | 91/23843  | 0.875663 | 0.915301 | 0.86365  | Ankzf1      |
| GO_BP_m3GO:003083regulation 2/539   | 159/23843 | 0.877514 | 0.91679  | 0.865055 | Mkks/Carr   |
| GO_BP_m3GO:006004retina deve2/539   | 159/23843 | 0.877514 | 0.91679  | 0.865055 | Cdon/lhh    |
| GO_BP_m3GO:000222toll-like rec1/539 | 92/23843  | 0.878484 | 0.917134 | 0.86538  | Mapkapk3    |
| GO_BP_m3GO:000704lysosomal tr1/539  | 92/23843  | 0.878484 | 0.917134 | 0.86538  | Rhob        |
| GO_BP_m3GO:001489striated mt1/539   | 92/23843  | 0.878484 | 0.917134 | 0.86538  | Ctdp1       |
| GO_BP_m3GO:004639carboxylic ;5/539  | 337/23843 | 0.880919 | 0.918228 | 0.866412 | Avp/Elovl2  |
| GO_BP_m3GO:000157vasculogen1/539    | 93/23843  | 0.881242 | 0.918228 | 0.866412 | Foxf1       |
| GO_BP_m3GO:001077negative re1/539   | 93/23843  | 0.881242 | 0.918228 | 0.866412 | Nlgn1       |
| GO_BP_m3GO:002178glial cell de1/539 | 93/23843  | 0.881242 | 0.918228 | 0.866412 | Sox10       |
| GO_BP_m3GO:003083positive rec1/539  | 93/23843  | 0.881242 | 0.918228 | 0.866412 | Carmil2     |
| GO_BP_m3GO:004364dicarboxyli1/539   | 93/23843  | 0.881242 | 0.918228 | 0.866412 | Dld         |
| GO_BP_m3GO:190382organic aci1/539   | 93/23843  | 0.881242 | 0.918228 | 0.866412 | Slc19a1     |
| GO_BP_m3GO:190503carboxylic ;1/539  | 93/23843  | 0.881242 | 0.918228 | 0.866412 | Slc19a1     |
| GO_BP_m3GO:001605organic aci5/539   | 338/23843 | 0.882454 | 0.919267 | 0.867393 | Avp/Elovl2  |
| GO_BP_m3GO:001489muscle hyc1/539    | 94/23843  | 0.883937 | 0.920143 | 0.868219 | Ctdp1       |
| GO_BP_m3GO:003806NIK/NF-ka1/539     | 94/23843  | 0.883937 | 0.920143 | 0.868219 | C1qtnf4     |
| GO_BP_m3GO:004691cellular trar1/539 | 94/23843  | 0.883937 | 0.920143 | 0.868219 | Hamp2       |
| GO_BP_m3GO:001714negative re3/539   | 225/23843 | 0.886395 | 0.922438 | 0.870384 | Caprin1/Hr  |
| GO_BP_m3GO:000911nucleoside 1/539   | 95/23843  | 0.886571 | 0.922438 | 0.870384 | Lrrk2       |
| GO_BP_m3GO:000664triglyceride1/539  | 96/23843  | 0.889146 | 0.923997 | 0.871856 | Nkx2-3      |
| GO_BP_m3GO:001052regulation 1/539   | 96/23843  | 0.889146 | 0.923997 | 0.871856 | Trpc1       |
| GO_BP_m3GO:001921regulation 1/539   | 96/23843  | 0.889146 | 0.923997 | 0.871856 | Bmp2        |
| GO_BP_m3GO:004563positive rec1/539  | 96/23843  | 0.889146 | 0.923997 | 0.871856 | Ccl5        |
| GO_BP_m3GO:005077positive rec1/539  | 96/23843  | 0.889146 | 0.923997 | 0.871856 | Dixdc1      |
| GO_BP_m3GO:005127negative re4/539   | 287/23843 | 0.891507 | 0.926164 | 0.8739   | Abr/Gpr17   |
| GO_BP_m3GO:190307regulation 1/539   | 97/23843  | 0.891662 | 0.926164 | 0.8739   | Bcl2l1      |
| GO_BP_m3GO:000641regulation 6/539   | 401/23843 | 0.892934 | 0.927261 | 0.874936 | Caprin1/Hr  |
| GO_BP_m3GO:000801regulation 2/539   | 167/23843 | 0.894054 | 0.927372 | 0.87504  | Oxt/Ucn     |
| GO_BP_m3GO:001972calcium-m2/539     | 167/23843 | 0.894054 | 0.927372 | 0.87504  | Lrrk2/Tff2  |
| GO_BP_m3GO:003440nucleobase2/539    | 167/23843 | 0.894054 | 0.927372 | 0.87504  | Hk1/ler3    |
| GO_BP_m3GO:001624regulation 1/539   | 98/23843  | 0.894121 | 0.927372 | 0.87504  | Lrrk2       |
| GO_BP_m3GO:005165maintenan1/539     | 98/23843  | 0.894121 | 0.927372 | 0.87504  | Hk1         |
| GO_BP_m3GO:002241cellular cor5/539  | 347/23843 | 0.89552  | 0.9286   | 0.876199 | Ckap2/Dna   |
| GO_BP_m3GO:001975polyol met.1/539   | 99/23843  | 0.896524 | 0.928968 | 0.876546 | Ippk        |
| GO_BP_m3GO:004203regulation 1/539   | 99/23843  | 0.896524 | 0.928968 | 0.876546 | Trib2       |
| GO_BP_m3GO:004213neurotrans1/539    | 99/23843  | 0.896524 | 0.928968 | 0.876546 | Klf2        |
| GO_BP_m3GO:000226myeloid ce2/539    | 169/23843 | 0.897852 | 0.930119 | 0.877632 | Klf2/L3mbt  |
| GO_BP_m3GO:005254regulation 5/539   | 349/23843 | 0.898248 | 0.930305 | 0.877807 | 9230104L0   |
| GO_BP_m3GO:004346regulation 1/539   | 100/23843 | 0.898873 | 0.930728 | 0.878207 | ler3        |
| GO_BP_m3GO:001988antigen prc1/539   | 101/23843 | 0.901169 | 0.932348 | 0.879736 | Kdm5d       |
| GO_BP_m3GO:004544endothelial1/539   | 101/23843 | 0.901169 | 0.932348 | 0.879736 | Tgfbr1      |
| GO_BP_m3GO:200037positive rec1/539  | 101/23843 | 0.901169 | 0.932348 | 0.879736 | Klf2        |
| GO_BP_m3GO:004259response tr2/539   | 171/23843 | 0.901523 | 0.932348 | 0.879736 | Lrrk2/Myoc  |
| GO_BP_m3GO:004632regulation 2/539   | 171/23843 | 0.901523 | 0.932348 | 0.879736 | Dixdc1/Gril |
| GO_BP_m3GO:004518maintenan1/539     | 102/23843 | 0.903413 | 0.933853 | 0.881155 | Hk1         |

|                                      |           |          |          |          |             |
|--------------------------------------|-----------|----------|----------|----------|-------------|
| GO_BP_m3GO:190401epithelial c1/539   | 102/23843 | 0.903413 | 0.933853 | 0.881155 | Bcl2l1      |
| GO_BP_m3GO:001407response tr1/539    | 103/23843 | 0.905606 | 0.934994 | 0.882232 | Fdx1        |
| GO_BP_m3GO:001895phenol-co1/539      | 103/23843 | 0.905606 | 0.934994 | 0.882232 | Trpc1       |
| GO_BP_m3GO:003051regulation 1/539    | 103/23843 | 0.905606 | 0.934994 | 0.882232 | Nkx6-1      |
| GO_BP_m3GO:003264regulation 1/539    | 103/23843 | 0.905606 | 0.934994 | 0.882232 | Carmil2     |
| GO_BP_m3GO:004814regulation 1/539    | 103/23843 | 0.905606 | 0.934994 | 0.882232 | Rps3a1      |
| GO_BP_m3GO:001973antimicrob1/539     | 104/23843 | 0.907749 | 0.936757 | 0.883895 | Defa27      |
| GO_BP_m3GO:190340reactive ox1/539    | 104/23843 | 0.907749 | 0.936757 | 0.883895 | Klf2        |
| GO_BP_m3GO:001923response tr1/539    | 105/23843 | 0.909843 | 0.938242 | 0.885296 | Vmn1r202    |
| GO_BP_m3GO:004814fibroblast p1/539   | 105/23843 | 0.909843 | 0.938242 | 0.885296 | Rps3a1      |
| GO_BP_m3GO:190437regulation 1/539    | 105/23843 | 0.909843 | 0.938242 | 0.885296 | Bcl2l1      |
| GO_BP_m3GO:001060posttranscr7/539    | 471/23843 | 0.910419 | 0.93861  | 0.885644 | Axin2/Capr  |
| GO_BP_m3GO:000008G1/S transi2/539    | 177/23843 | 0.911811 | 0.938621 | 0.885654 | Ranbp3l/U   |
| GO_BP_m3GO:001652negative re1/539    | 106/23843 | 0.91189  | 0.938621 | 0.885654 | Klf2        |
| GO_BP_m3GO:004353blood vess1/539     | 106/23843 | 0.91189  | 0.938621 | 0.885654 | Foxc2       |
| GO_BP_m3GO:005120release of e1/539   | 106/23843 | 0.91189  | 0.938621 | 0.885654 | Trpc1       |
| GO_BP_m3GO:005128negative re1/539    | 106/23843 | 0.91189  | 0.938621 | 0.885654 | Trpc1       |
| GO_BP_m3GO:003424negative re3/539    | 241/23843 | 0.911959 | 0.938621 | 0.885654 | Caprin1/Hr  |
| GO_BP_m3GO:004508regulation 3/539    | 241/23843 | 0.911959 | 0.938621 | 0.885654 | Mapkap3,    |
| GO_BP_m3GO:000806regulation 2/539    | 178/23843 | 0.913425 | 0.939259 | 0.886256 | Mkks/Carr   |
| GO_BP_m3GO:000190leukocyte r1/539    | 107/23843 | 0.913891 | 0.939259 | 0.886256 | Dnase1l3    |
| GO_BP_m3GO:000641translation:1/539   | 107/23843 | 0.913891 | 0.939259 | 0.886256 | Dhx29       |
| GO_BP_m3GO:000834adult locon1/539    | 107/23843 | 0.913891 | 0.939259 | 0.886256 | Gip         |
| GO_BP_m3GO:005122spindle ass1/539    | 107/23843 | 0.913891 | 0.939259 | 0.886256 | Ccdc155     |
| GO_BP_m3GO:005128regulation 1/539    | 107/23843 | 0.913891 | 0.939259 | 0.886256 | Trpc1       |
| GO_BP_m3GO:001633morphoge12/539      | 179/23843 | 0.915011 | 0.939694 | 0.886667 | Ptch1/Twis  |
| GO_BP_m3GO:003083regulation 2/539    | 179/23843 | 0.915011 | 0.939694 | 0.886667 | Mkks/Carr   |
| GO_BP_m3GO:009752myeloid let2/539    | 179/23843 | 0.915011 | 0.939694 | 0.886667 | Ccl5/Prtn3  |
| GO_BP_m3GO:000698response tr1/539    | 108/23843 | 0.915846 | 0.939694 | 0.886667 | Stc2        |
| GO_BP_m3GO:005120sequesterir1/539    | 108/23843 | 0.915846 | 0.939694 | 0.886667 | Trpc1       |
| GO_BP_m3GO:007134cellular res1/539   | 108/23843 | 0.915846 | 0.939694 | 0.886667 | Ccl5        |
| GO_BP_m3GO:200027regulation 1/539    | 108/23843 | 0.915846 | 0.939694 | 0.886667 | Gnl3l       |
| GO_BP_m3GO:004001negative re4/539    | 305/23843 | 0.916395 | 0.940032 | 0.886986 | Abr/Gpr17:  |
| GO_BP_m3GO:003158cell-substr:4/539   | 306/23843 | 0.917615 | 0.940756 | 0.887669 | Foxf1/Gpm   |
| GO_BP_m3GO:007162granulocy1/539      | 109/23843 | 0.917758 | 0.940756 | 0.887669 | Ccl5        |
| GO_BP_m3GO:200018negative re1/539    | 109/23843 | 0.917758 | 0.940756 | 0.887669 | Klf2        |
| GO_BP_m3GO:003030negative re2/539    | 181/23843 | 0.918101 | 0.940884 | 0.887789 | Ctdp1/Nf2   |
| GO_BP_m3GO:200037regulation 2/539    | 182/23843 | 0.919606 | 0.941996 | 0.888839 | Ier3/Klf2   |
| GO_BP_m3GO:000268regulation 1/539    | 110/23843 | 0.919625 | 0.941996 | 0.888839 | Ccl5        |
| GO_BP_m3GO:000194hair follicle 1/539 | 111/23843 | 0.921451 | 0.943641 | 0.890391 | Prss8       |
| GO_BP_m3GO:007265protein loc 3/539   | 249/23843 | 0.922678 | 0.944673 | 0.891364 | Bcl2l1/Prkc |
| GO_BP_m3GO:004208cytokine bi1/539    | 112/23843 | 0.923235 | 0.945017 | 0.89169  | Trib2       |
| GO_BP_m3GO:004819Golgi vesic 3/539   | 250/23843 | 0.923931 | 0.94545  | 0.892098 | Cux2/Exoc:  |
| GO_BP_m3GO:001605vesicle org:4/539   | 312/23843 | 0.924608 | 0.94545  | 0.892098 | Ptpn/Stx1:  |
| GO_BP_m3GO:001921regulation 4/539    | 312/23843 | 0.924608 | 0.94545  | 0.892098 | Avp/Bmp2,   |
| GO_BP_m3GO:004586positive re4/539    | 312/23843 | 0.924608 | 0.94545  | 0.892098 | Lrrk2/Pacsi |
| GO_BP_m3GO:003572sodium ion1/539     | 113/23843 | 0.924978 | 0.94545  | 0.892098 | Stoml1      |
| GO_BP_m3GO:009877skin epider 1/539   | 113/23843 | 0.924978 | 0.94545  | 0.892098 | Prss8       |

|                                      |           |          |          |          |              |
|--------------------------------------|-----------|----------|----------|----------|--------------|
| GO_BP_m3GO:00224C molting cyc1/539   | 114/23843 | 0.926682 | 0.946586 | 0.89317  | Prss8        |
| GO_BP_m3GO:00224C hair cycle p1/539  | 114/23843 | 0.926682 | 0.946586 | 0.89317  | Prss8        |
| GO_BP_m3GO:00162C macroauto 2/539    | 187/23843 | 0.926751 | 0.946586 | 0.89317  | Lrrk2/Stx12  |
| GO_BP_m3GO:00018E liver develc1/539  | 115/23843 | 0.928348 | 0.947091 | 0.893646 | Hes1         |
| GO_BP_m3GO:00066E acylglycerc1/539   | 115/23843 | 0.928348 | 0.947091 | 0.893646 | Nkx2-3       |
| GO_BP_m3GO:00068E ER to Golgi1/539   | 115/23843 | 0.928348 | 0.947091 | 0.893646 | Ier3ip1      |
| GO_BP_m3GO:00326C interferon- 1/539  | 115/23843 | 0.928348 | 0.947091 | 0.893646 | Carmil2      |
| GO_BP_m3GO:00362C cellular res1/539  | 115/23843 | 0.928348 | 0.947091 | 0.893646 | Twist1       |
| GO_BP_m3GO:00421C cytokine m1/539    | 116/23843 | 0.929975 | 0.948076 | 0.894576 | Trib2        |
| GO_BP_m3GO:00517C interaction 1/539  | 116/23843 | 0.929975 | 0.948076 | 0.894576 | Bcl2l1       |
| GO_BP_m3GO:190134negative re1/539    | 116/23843 | 0.929975 | 0.948076 | 0.894576 | Klf2         |
| GO_BP_m3GO:005077regulation 2/539    | 190/23843 | 0.930745 | 0.948636 | 0.895104 | Dixdc1/Nkx   |
| GO_BP_m3GO:00725E reactive ox3/539   | 256/23843 | 0.931064 | 0.948735 | 0.895198 | Ier3/Klf2/Lr |
| GO_BP_m3GO:00066E neutral lipic1/539 | 117/23843 | 0.931566 | 0.949022 | 0.895468 | Nkx2-3       |
| GO_BP_m3GO:005134positive re7/539    | 495/23843 | 0.933082 | 0.94993  | 0.896325 | BC048507/    |
| GO_BP_m3GO:00169E antibiotic n1/539  | 118/23843 | 0.933121 | 0.94993  | 0.896325 | Dlat         |
| GO_BP_m3GO:00610C hepaticobil1/539   | 118/23843 | 0.933121 | 0.94993  | 0.896325 | Hes1         |
| GO_BP_m3GO:00305E leukocyte c2/539   | 193/23843 | 0.934533 | 0.951026 | 0.897359 | Ccl5/S1pr1   |
| GO_BP_m3GO:00613E regulation 1/539   | 119/23843 | 0.93464  | 0.951026 | 0.897359 | Nkx6-1       |
| GO_BP_m3GO:003424regulation 6/539    | 441/23843 | 0.935646 | 0.951824 | 0.898112 | Caprin1/Hr   |
| GO_BP_m3GO:19016C alpha-amir2/539    | 195/23843 | 0.936949 | 0.952885 | 0.899113 | Gcsh/Thnsl   |
| GO_BP_m3GO:000072telomere n1/539     | 121/23843 | 0.937576 | 0.952885 | 0.899113 | Gnl3l        |
| GO_BP_m3GO:000222pattern rec1/539    | 121/23843 | 0.937576 | 0.952885 | 0.899113 | Mapkapk3     |
| GO_BP_m3GO:19016E glycosyl co1/539   | 121/23843 | 0.937576 | 0.952885 | 0.899113 | Lrrk2        |
| GO_BP_m3GO:00069E nucleus or1/539    | 122/23843 | 0.938995 | 0.953649 | 0.899834 | Ankle1       |
| GO_BP_m3GO:00095E detection c1/539   | 122/23843 | 0.938995 | 0.953649 | 0.899834 | Mkks         |
| GO_BP_m3GO:003192TOR signal 1/539    | 122/23843 | 0.938995 | 0.953649 | 0.899834 | Prr5         |
| GO_BP_m3GO:000931response tr5/539    | 388/23843 | 0.940335 | 0.953738 | 0.899918 | Bcl2l1/Crya  |
| GO_BP_m3GO:00027E innate imr1/539    | 123/23843 | 0.940381 | 0.953738 | 0.899918 | Mapkapk3     |
| GO_BP_m3GO:00322C telomere o1/539    | 123/23843 | 0.940381 | 0.953738 | 0.899918 | Gnl3l        |
| GO_BP_m3GO:00459E regulation 1/539   | 123/23843 | 0.940381 | 0.953738 | 0.899918 | Hes1         |
| GO_BP_m3GO:19028C regulation 1/539   | 123/23843 | 0.940381 | 0.953738 | 0.899918 | Susd2        |
| GO_BP_m3GO:00450E positive re2/539   | 198/23843 | 0.940414 | 0.953738 | 0.899918 | Mapkapk3,    |
| GO_BP_m3GO:00713E cellular res1/539  | 124/23843 | 0.941736 | 0.954852 | 0.90097  | Ptprn        |
| GO_BP_m3GO:003227positive re1/539    | 125/23843 | 0.94306  | 0.955969 | 0.902023 | Carmil2      |
| GO_BP_m3GO:00080E cell recogn3/539   | 268/23843 | 0.943519 | 0.956209 | 0.90225  | Ighv1-53/l   |
| GO_BP_m3GO:00713E cellular res1/539  | 126/23843 | 0.944354 | 0.956708 | 0.902721 | Ptprn        |
| GO_BP_m3GO:00705E calcium ior3/539   | 269/23843 | 0.944457 | 0.956708 | 0.902721 | Catsper4/C   |
| GO_BP_m3GO:005092regulation 2/539    | 202/23843 | 0.944755 | 0.956784 | 0.902792 | Ccl5/S1pr1   |
| GO_BP_m3GO:000652cellular am3/539    | 270/23843 | 0.94538  | 0.956932 | 0.902932 | Gcsh/Thnsl   |
| GO_BP_m3GO:00463E positive re1/539   | 127/23843 | 0.945618 | 0.956932 | 0.902932 | Dixdc1       |
| GO_BP_m3GO:007132cellular res1/539   | 127/23843 | 0.945618 | 0.956932 | 0.902932 | Ptprn        |
| GO_BP_m3GO:00302E lipid modif2/539   | 203/23843 | 0.945792 | 0.956932 | 0.902932 | Slc25a17/T   |
| GO_BP_m3GO:006032cell chemo3/539     | 274/23843 | 0.948933 | 0.959884 | 0.905717 | Ccl5/Hoxb9   |
| GO_BP_m3GO:00550E lipid home1/539    | 130/23843 | 0.949243 | 0.959971 | 0.9058   | Gip          |
| GO_BP_m3GO:003434response tr1/539    | 131/23843 | 0.950396 | 0.960685 | 0.906474 | Ccl5         |
| GO_BP_m3GO:005507transition n1/539   | 131/23843 | 0.950396 | 0.960685 | 0.906474 | Hamp2        |
| GO_BP_m3GO:00902E negative re1/539   | 133/23843 | 0.952626 | 0.962713 | 0.908386 | Ptprf        |

|                                    |           |          |          |          |             |
|------------------------------------|-----------|----------|----------|----------|-------------|
| GO_BP_m3GO:000941response tr1/539  | 134/23843 | 0.953703 | 0.963348 | 0.908985 | Cryaa       |
| GO_BP_m3GO:007132cellular res1/539 | 134/23843 | 0.953703 | 0.963348 | 0.908985 | Ptprn       |
| GO_BP_m3GO:001648cytosolic tr1/539 | 135/23843 | 0.954755 | 0.963731 | 0.909347 | Lrrk2       |
| GO_BP_m3GO:003021keratinocyt1/539  | 135/23843 | 0.954755 | 0.963731 | 0.909347 | Prkch       |
| GO_BP_m3GO:190406positive re1/539  | 135/23843 | 0.954755 | 0.963731 | 0.909347 | Trpc1       |
| GO_BP_m3GO:00321Cpositive re3/539  | 284/23843 | 0.956895 | 0.965664 | 0.911171 | Ccl5/Il17d/ |
| GO_BP_m3GO:000941response tr2/539  | 217/23843 | 0.958499 | 0.967055 | 0.912483 | Cyp2c38/U   |
| GO_BP_m3GO:004255myelinatio1/539   | 139/23843 | 0.958732 | 0.967063 | 0.912491 | Sox10       |
| GO_BP_m3GO:000221activation c1/539 | 140/23843 | 0.95967  | 0.967782 | 0.91317  | Mapkapk3    |
| GO_BP_m3GO:000727ensheathm1/539    | 142/23843 | 0.961484 | 0.969156 | 0.914466 | Sox10       |
| GO_BP_m3GO:000836axon enshe1/539   | 142/23843 | 0.961484 | 0.969156 | 0.914466 | Sox10       |
| GO_BP_m3GO:001067regulation 1/539  | 143/23843 | 0.96236  | 0.969637 | 0.91492  | Ier3        |
| GO_BP_m3GO:004002regulation 3/539  | 292/23843 | 0.962412 | 0.969637 | 0.91492  | Hypm/Klf2,  |
| GO_BP_m3GO:000633chromatin 1/539   | 145/23843 | 0.964052 | 0.971061 | 0.916264 | Satb1       |
| GO_BP_m3GO:000756cell aging 1/539  | 147/23843 | 0.965669 | 0.972461 | 0.917585 | Twist1      |
| GO_BP_m3GO:000633chromatin 1/539   | 148/23843 | 0.96645  | 0.97302  | 0.918112 | Chd3        |
| GO_BP_m3GO:190316regulation 1/539  | 149/23843 | 0.967213 | 0.973332 | 0.918406 | Trpc1       |
| GO_BP_m3GO:190547regulation 1/539  | 149/23843 | 0.967213 | 0.973332 | 0.918406 | Bcl2l1      |
| GO_BP_m3GO:006156axon devel6/539   | 493/23843 | 0.968313 | 0.97421  | 0.919235 | Dixdc1/Nk   |
| GO_BP_m3GO:003476positive re1/539  | 151/23843 | 0.968688 | 0.974359 | 0.919376 | Trpc1       |
| GO_BP_m3GO:000726small GTPa6/539   | 495/23843 | 0.969194 | 0.97464  | 0.919641 | Abr/Arhga   |
| GO_BP_m3GO:007189DNA biosy1/539    | 153/23843 | 0.970096 | 0.975113 | 0.920087 | Gnl3l       |
| GO_BP_m3GO:00105Cregulation 2/539  | 234/23843 | 0.970118 | 0.975113 | 0.920087 | Lrrk2/Tfeb  |
| GO_BP_m3GO:004657regulation 2/539  | 237/23843 | 0.971813 | 0.976588 | 0.921479 | Abr/Scai    |
| GO_BP_m3GO:00061Cregulation 1/539  | 167/23843 | 0.978335 | 0.982453 | 0.927013 | Ier3        |
| GO_BP_m3GO:000974response tr1/539  | 167/23843 | 0.978335 | 0.982453 | 0.927013 | Ptprn       |
| GO_BP_m3GO:009716ammoniumr1/539    | 167/23843 | 0.978335 | 0.982453 | 0.927013 | Enpp7       |
| GO_BP_m3GO:00074Caxonogene5/539    | 461/23843 | 0.979715 | 0.983445 | 0.927949 | Dixdc1/Nk   |
| GO_BP_m3GO:000974response tr1/539  | 170/23843 | 0.979782 | 0.983445 | 0.927949 | Ptprn       |
| GO_BP_m3GO:001619endosomal1/539    | 171/23843 | 0.980242 | 0.983448 | 0.927951 | Lrrk2       |
| GO_BP_m3GO:003428response tr1/539  | 171/23843 | 0.980242 | 0.983448 | 0.927951 | Ptprn       |
| GO_BP_m3GO:000974response tr1/539  | 184/23843 | 0.985356 | 0.988347 | 0.932574 | Ptprn       |
| GO_BP_m3GO:005126protein hor3/539  | 349/23843 | 0.986261 | 0.989025 | 0.933214 | Cryaa/Hsf4  |
| GO_BP_m3GO:000726Ras proteir4/539  | 426/23843 | 0.987752 | 0.990127 | 0.934254 | Abr/Dhcr2   |
| GO_BP_m3GO:000724I-kappaB k1/539   | 192/23843 | 0.987822 | 0.990127 | 0.934254 | Tifab       |
| GO_BP_m3GO:000941response tr2/539  | 281/23843 | 0.988185 | 0.990261 | 0.93438  | Cryaa/Sgk1  |
| GO_BP_m3GO:00711C DNA confo1/539   | 204/23843 | 0.990765 | 0.992353 | 0.936354 | Top3b       |
| GO_BP_m3GO:000691autophagy 3/539   | 372/23843 | 0.990967 | 0.992353 | 0.936354 | Lrrk2/Stx12 |
| GO_BP_m3GO:006191process uti3/539  | 372/23843 | 0.990967 | 0.992353 | 0.936354 | Lrrk2/Stx12 |
| GO_BP_m3GO:007182protein-D1/539    | 211/23843 | 0.992142 | 0.993299 | 0.937247 | Gtf2e1      |
| GO_BP_m3GO:005123maintenan1/539    | 303/23843 | 0.992412 | 0.993337 | 0.937283 | Hk1/Trpc1   |
| GO_BP_m3GO:000741axon guida1/539   | 214/23843 | 0.992668 | 0.993362 | 0.937306 | Ptch1       |
| GO_BP_m3GO:009748neuron prc1/539   | 216/23843 | 0.992999 | 0.993461 | 0.9374   | Ptch1       |
| GO_BP_m3GO:004648glycerolipic1/539 | 306/23843 | 0.999126 | 0.999359 | 0.942965 | Nkx2-3      |
| GO_BP_m3GO:000664phospholip1/539   | 332/23843 | 0.999522 | 0.999522 | 0.943118 | Enpp7       |
| GO_BP_m4GO:007129cellular res4/727 | 12/23843  | 0.000349 | 0.592594 | 0.583728 | Folr1/Gas6  |
| GO_BP_m4GO:003327response tr5/727  | 25/23843  | 0.000832 | 0.592594 | 0.583728 | Folr1/Gas6  |
| GO_BP_m4GO:003057bile acid ca2/727 | 2/23843   | 0.000928 | 0.592594 | 0.583728 | Akr1d1/Cy   |



|                               |        |           |          |          |          |             |
|-------------------------------|--------|-----------|----------|----------|----------|-------------|
| GO_BP_m4GO:005085regulation   | 6/727  | 39/23843  | 0.001088 | 0.592594 | 0.583728 | Bcl10/Btn2  |
| GO_BP_m4GO:00435Cregulation   | 9/727  | 88/23843  | 0.001448 | 0.592594 | 0.583728 | Ager/Dusp   |
| GO_BP_m4GO:004361keratinocyt  | 6/727  | 42/23843  | 0.00162  | 0.592594 | 0.583728 | Cdh3/Fst/C  |
| GO_BP_m4GO:00435Cpositive re  | 8/727  | 73/23843  | 0.001686 | 0.592594 | 0.583728 | Ager/Ern2/  |
| GO_BP_m4GO:001083regulation   | 5/727  | 31/23843  | 0.002287 | 0.592594 | 0.583728 | Cdh3/Ovol   |
| GO_BP_m4GO:004564regulation   | 4/727  | 19/23843  | 0.002305 | 0.592594 | 0.583728 | Il34/Ripk1/ |
| GO_BP_m4GO:001582L-serine tra | 2/727  | 3/23843   | 0.002729 | 0.592594 | 0.583728 | Slc1a4/Slc1 |
| GO_BP_m4GO:007149cellular res | 2/727  | 3/23843   | 0.002729 | 0.592594 | 0.583728 | Mme/Ppid    |
| GO_BP_m4GO:200128positive re  | 2/727  | 3/23843   | 0.002729 | 0.592594 | 0.583728 | Itsn1/Nedc  |
| GO_BP_m4GO:19037Cpositive re  | 14/727 | 198/23843 | 0.003133 | 0.592594 | 0.583728 | Ager/Btn2a  |
| GO_BP_m4GO:004412regulation   | 4/727  | 21/23843  | 0.003392 | 0.592594 | 0.583728 | Mbl1/Mbl2   |
| GO_BP_m4GO:007258caveolin-r   | 3/727  | 11/23843  | 0.003878 | 0.592594 | 0.583728 | Itsn1/Mlc1/ |
| GO_BP_m4GO:000965response tr  | 5/727  | 35/23843  | 0.003954 | 0.592594 | 0.583728 | Mir29b-1/I  |
| GO_BP_m4GO:003167cellular res | 5/727  | 35/23843  | 0.003954 | 0.592594 | 0.583728 | Folr1/Gas6  |
| GO_BP_m4GO:005085regulation   | 6/727  | 51/23843  | 0.004414 | 0.592594 | 0.583728 | Bcl10/Btn2  |
| GO_BP_m4GO:004414modulator    | 4/727  | 23/23843  | 0.004782 | 0.592594 | 0.583728 | Mbl1/Mbl2   |
| GO_BP_m4GO:007147cellular res | 4/727  | 23/23843  | 0.004782 | 0.592594 | 0.583728 | Mir29b-1/I  |
| GO_BP_m4GO:001624autophago    | 2/727  | 4/23843   | 0.005348 | 0.592594 | 0.583728 | Stx17/Vam   |
| GO_BP_m4GO:003232serine tran  | 2/727  | 4/23843   | 0.005348 | 0.592594 | 0.583728 | Slc1a4/Slc1 |
| GO_BP_m4GO:006021endocardia   | 2/727  | 4/23843   | 0.005348 | 0.592594 | 0.583728 | Ovol2/Sox3  |
| GO_BP_m4GO:000758response tr  | 8/727  | 89/23843  | 0.005802 | 0.592594 | 0.583728 | Folr1/Gas6  |
| GO_BP_m4GO:004565positive re  | 3/727  | 13/23843  | 0.006424 | 0.592594 | 0.583728 | Il34/Ripk1/ |
| GO_BP_m4GO:004411growth of    | 4/727  | 25/23843  | 0.006511 | 0.592594 | 0.583728 | Mbl1/Mbl2   |
| GO_BP_m4GO:004558regulation   | 4/727  | 25/23843  | 0.006511 | 0.592594 | 0.583728 | Btn2a2/Du   |
| GO_BP_m4GO:007037ERK1 and E   | 19/727 | 336/23843 | 0.007681 | 0.592594 | 0.583728 | Ager/Btn2a  |
| GO_BP_m4GO:004411growth inv   | 4/727  | 27/23843  | 0.00861  | 0.592594 | 0.583728 | Mbl1/Mbl2   |
| GO_BP_m4GO:004411growth of    | 4/727  | 27/23843  | 0.00861  | 0.592594 | 0.583728 | Mbl1/Mbl2   |
| GO_BP_m4GO:000686glutamine    | 2/727  | 5/23843   | 0.008733 | 0.592594 | 0.583728 | Slc1a5/Slc3 |
| GO_BP_m4GO:00198Cquinolinate  | 2/727  | 5/23843   | 0.008733 | 0.592594 | 0.583728 | Acmsd/Kyr   |
| GO_BP_m4GO:003278bile acid se | 2/727  | 5/23843   | 0.008733 | 0.592594 | 0.583728 | Abcb4/Slc5  |
| GO_BP_m4GO:004484estrous cyc  | 2/727  | 5/23843   | 0.008733 | 0.592594 | 0.583728 | Erbp2/Esr2  |
| GO_BP_m4GO:004802positive re  | 2/727  | 5/23843   | 0.008733 | 0.592594 | 0.583728 | Cdh3/Zeb2   |
| GO_BP_m4GO:007029N-acyletha   | 2/727  | 5/23843   | 0.008733 | 0.592594 | 0.583728 | Abhd4/Gdq   |
| GO_BP_m4GO:009901modificati   | 2/727  | 5/23843   | 0.008733 | 0.592594 | 0.583728 | Synpo/Tiar  |
| GO_BP_m4GO:004563positive re  | 8/727  | 96/23843  | 0.009062 | 0.592594 | 0.583728 | Car2/Gata1  |
| GO_BP_m4GO:007037regulation   | 18/727 | 318/23843 | 0.009215 | 0.592594 | 0.583728 | Ager/Btn2a  |
| GO_BP_m4GO:19021Cpositive re  | 11/727 | 159/23843 | 0.0097   | 0.592594 | 0.583728 | Ager/Btn2a  |
| GO_BP_m4GO:007233modified a   | 3/727  | 15/23843  | 0.009767 | 0.592594 | 0.583728 | Folr1/Slc16 |
| GO_BP_m4GO:200064negative re  | 3/727  | 15/23843  | 0.009767 | 0.592594 | 0.583728 | Ctnna1/Nf   |
| GO_BP_m4GO:004506regulatory   | 4/727  | 28/23843  | 0.009807 | 0.592594 | 0.583728 | Btn2a2/Du   |
| GO_BP_m4GO:000218cytoplasmic  | 8/727  | 98/23843  | 0.010205 | 0.592594 | 0.583728 | Eif3a/Rpl22 |
| GO_BP_m4GO:200123positive re  | 6/727  | 61/23843  | 0.010548 | 0.592594 | 0.583728 | Bcl10/Ctnn  |
| GO_BP_m4GO:007121cellular res | 16/727 | 275/23843 | 0.010665 | 0.592594 | 0.583728 | Agap3/Gna   |
| GO_BP_m4GO:01040Ccellular res | 16/727 | 275/23843 | 0.010665 | 0.592594 | 0.583728 | Agap3/Gna   |
| GO_BP_m4GO:005189regulation   | 10/727 | 140/23843 | 0.010803 | 0.592594 | 0.583728 | Btn2a2/Dd   |
| GO_BP_m4GO:200124positive re  | 3/727  | 16/23843  | 0.011752 | 0.592594 | 0.583728 | Ctnna1/Inh  |
| GO_BP_m4GO:001572canalicular  | 2/727  | 6/23843   | 0.012836 | 0.592594 | 0.583728 | Aqp9/Mip    |
| GO_BP_m4GO:003154brain-deriv  | 2/727  | 6/23843   | 0.012836 | 0.592594 | 0.583728 | Fam72a/Ti   |

|                                     |           |          |          |          |             |
|-------------------------------------|-----------|----------|----------|----------|-------------|
| GO_BP_m4GO:003279negative re2/727   | 6/23843   | 0.012836 | 0.592594 | 0.583728 | Ddit3/Sik1  |
| GO_BP_m4GO:004687quinolate2/727     | 6/23843   | 0.012836 | 0.592594 | 0.583728 | Acmsd/Kyr   |
| GO_BP_m4GO:190037positive re2/727   | 6/23843   | 0.012836 | 0.592594 | 0.583728 | Cdh3/Zeb2   |
| GO_BP_m4GO:200128regulation 2/727   | 6/23843   | 0.012836 | 0.592594 | 0.583728 | Itsn1/Nedc  |
| GO_BP_m4GO:004263regulation 4/727   | 31/23843  | 0.014028 | 0.592594 | 0.583728 | Cdh3/Fst/Ir |
| GO_BP_m4GO:007147cellular res10/727 | 146/23843 | 0.014197 | 0.592594 | 0.583728 | Agap3/Gna   |
| GO_BP_m4GO:004349protein kin.11/727 | 168/23843 | 0.014222 | 0.592594 | 0.583728 | Btn2a2/Dd   |
| GO_BP_m4GO:000758digestion 9/727    | 125/23843 | 0.014463 | 0.592594 | 0.583728 | Akr1d1/Ap   |
| GO_BP_m4GO:003127regulation 5/727   | 48/23843  | 0.0151   | 0.592594 | 0.583728 | Cap2/Gng1   |
| GO_BP_m4GO:200123regulation 5/727   | 48/23843  | 0.0151   | 0.592594 | 0.583728 | Ctnna1/Ga   |
| GO_BP_m4GO:001589drug trans12/727   | 193/23843 | 0.015642 | 0.592594 | 0.583728 | Abcb1b/Ak   |
| GO_BP_m4GO:000608acetyl-CoA4/727    | 32/23843  | 0.015655 | 0.592594 | 0.583728 | Kynu/Nudt   |
| GO_BP_m4GO:004633positive re9/727   | 127/23843 | 0.0159   | 0.592594 | 0.583728 | Ager/Ern2/  |
| GO_BP_m4GO:004434cellular res7/727  | 86/23843  | 0.01602  | 0.592594 | 0.583728 | Fgf17/Fgf4  |
| GO_BP_m4GO:003223regulation 3/727   | 18/23843  | 0.016369 | 0.592594 | 0.583728 | Rbm26/Rip   |
| GO_BP_m4GO:007147cellular hyc3/727  | 18/23843  | 0.016369 | 0.592594 | 0.583728 | Mir29b-1/I  |
| GO_BP_m4GO:000316endocardiu2/727    | 7/23843   | 0.017609 | 0.592594 | 0.583728 | Ovol2/Sox1  |
| GO_BP_m4GO:000317aortic valve2/727  | 7/23843   | 0.017609 | 0.592594 | 0.583728 | Efna1/Nfat  |
| GO_BP_m4GO:000318aortic valve2/727  | 7/23843   | 0.017609 | 0.592594 | 0.583728 | Efna1/Nfat  |
| GO_BP_m4GO:005179negative re2/727   | 7/23843   | 0.017609 | 0.592594 | 0.583728 | Cdh3/Inhbc  |
| GO_BP_m4GO:007014response tr2/727   | 7/23843   | 0.017609 | 0.592594 | 0.583728 | Mme/Ppid    |
| GO_BP_m4GO:190197negative re2/727   | 7/23843   | 0.017609 | 0.592594 | 0.583728 | Aurka/Thor  |
| GO_BP_m4GO:200057positive re2/727   | 7/23843   | 0.017609 | 0.592594 | 0.583728 | Dynll2/Mtc  |
| GO_BP_m4GO:007177response tr7/727   | 88/23843  | 0.017978 | 0.592594 | 0.583728 | Fgf17/Fgf4  |
| GO_BP_m4GO:005508lipid home9/727    | 130/23843 | 0.01825  | 0.592594 | 0.583728 | Abcb4/Abf   |
| GO_BP_m4GO:007058calcium ior15/727  | 269/23843 | 0.018616 | 0.592594 | 0.583728 | Cacna1b/C   |
| GO_BP_m4GO:000150cartilage cc3/727  | 19/23843  | 0.019006 | 0.592594 | 0.583728 | Fgf4/Mapk   |
| GO_BP_m4GO:001501heparan su3/727    | 19/23843  | 0.019006 | 0.592594 | 0.583728 | Lipc/Pxylp1 |
| GO_BP_m4GO:003599response tr3/727   | 19/23843  | 0.019006 | 0.592594 | 0.583728 | Mapk14/Re   |
| GO_BP_m4GO:005089intestinal a4/727  | 34/23843  | 0.019251 | 0.592594 | 0.583728 | Apoa4/Npc   |
| GO_BP_m4GO:007182plasma lipc4/727   | 34/23843  | 0.019251 | 0.592594 | 0.583728 | Apoa4/Lipc  |
| GO_BP_m4GO:200123positive re11/727  | 176/23843 | 0.019439 | 0.592594 | 0.583728 | Bcl10/Ctnn  |
| GO_BP_m4GO:000749endoderm 6/727     | 70/23843  | 0.019833 | 0.592594 | 0.583728 | Arc/Dusp2,  |
| GO_BP_m4GO:002261ribonucleo12/727   | 422/23843 | 0.019993 | 0.592594 | 0.583728 | Cnot6/Eif3a |
| GO_BP_m4GO:005189positive re7/727   | 90/23843  | 0.020098 | 0.592594 | 0.583728 | C1qtnf12/C  |
| GO_BP_m4GO:000815negative re4/727   | 35/23843  | 0.021225 | 0.592594 | 0.583728 | Hcrt/Hus1/  |
| GO_BP_m4GO:004304ATP-deper4/727     | 35/23843  | 0.021225 | 0.592594 | 0.583728 | Anp32b/Sr   |
| GO_BP_m4GO:003436protein-lip 3/727  | 20/23843  | 0.021864 | 0.592594 | 0.583728 | Apoa4/Lipc  |
| GO_BP_m4GO:003436plasma lipc3/727   | 20/23843  | 0.021864 | 0.592594 | 0.583728 | Apoa4/Lipc  |
| GO_BP_m4GO:004413negative re3/727   | 20/23843  | 0.021864 | 0.592594 | 0.583728 | Mbl1/Mbl2   |
| GO_BP_m4GO:004573negative re3/727   | 20/23843  | 0.021864 | 0.592594 | 0.583728 | Recql5/Rps  |
| GO_BP_m4GO:009874cell aggreg3/727   | 20/23843  | 0.021864 | 0.592594 | 0.583728 | Fgf4/Mapk   |
| GO_BP_m4GO:000854fibroblast c6/727  | 72/23843  | 0.022472 | 0.592594 | 0.583728 | Fgf17/Fgf4  |
| GO_BP_m4GO:000912deoxyribor 2/727   | 8/23843   | 0.023009 | 0.592594 | 0.583728 | Dguok/Tk1   |
| GO_BP_m4GO:001567carbon dio 2/727   | 8/23843   | 0.023009 | 0.592594 | 0.583728 | Car2/Car4   |
| GO_BP_m4GO:003437very-low-c2/727    | 8/23843   | 0.023009 | 0.592594 | 0.583728 | Apoa4/Lipc  |
| GO_BP_m4GO:004263negative re2/727   | 8/23843   | 0.023009 | 0.592594 | 0.583728 | Cdh3/Inhbc  |
| GO_BP_m4GO:004565positive re2/727   | 8/23843   | 0.023009 | 0.592594 | 0.583728 | Il34/Zfp36l |

|                                     |           |          |          |          |              |
|-------------------------------------|-----------|----------|----------|----------|--------------|
| GO_BP_m4GO:004802regulation 2/727   | 8/23843   | 0.023009 | 0.592594 | 0.583728 | Cdh3/Zeb2    |
| GO_BP_m4GO:007056vitamin D r2/727   | 8/23843   | 0.023009 | 0.592594 | 0.583728 | Pim1/Vdr     |
| GO_BP_m4GO:003022macrophag4/727     | 36/23843  | 0.023318 | 0.592594 | 0.583728 | Il34/Ripk1/  |
| GO_BP_m4GO:001591sterol trans6/727  | 73/23843  | 0.023875 | 0.592594 | 0.583728 | Abcb4/Abc    |
| GO_BP_m4GO:003436protein-co 3/727   | 21/23843  | 0.024943 | 0.592594 | 0.583728 | Apoa4/Lipc   |
| GO_BP_m4GO:004568negative re3/727   | 21/23843  | 0.024943 | 0.592594 | 0.583728 | Cdh3/Inhba   |
| GO_BP_m4GO:007182protein-lip 4/727  | 37/23843  | 0.025532 | 0.592594 | 0.583728 | Apoa4/Lipc   |
| GO_BP_m4GO:004642negative re5/727   | 55/23843  | 0.025822 | 0.592594 | 0.583728 | Flrt1/Lrrc19 |
| GO_BP_m4GO:190489negative re5/727   | 55/23843  | 0.025822 | 0.592594 | 0.583728 | Flrt1/Lrrc19 |
| GO_BP_m4GO:004568regulation 6/727   | 75/23843  | 0.026856 | 0.592594 | 0.583728 | Cdh3/Fst/Ir  |
| GO_BP_m4GO:004671acid secreti8/727  | 117/23843 | 0.026935 | 0.592594 | 0.583728 | Abcb4/Abc    |
| GO_BP_m4GO:004694carboxylic ;15/727 | 283/23843 | 0.027723 | 0.592594 | 0.583728 | Abcb4/Abc    |
| GO_BP_m4GO:19021C regulation 15/727 | 283/23843 | 0.027723 | 0.592594 | 0.583728 | Ager/Btn2a   |
| GO_BP_m4GO:001633calcium-de4/727    | 38/23843  | 0.027869 | 0.592594 | 0.583728 | Cdh24/Cd1    |
| GO_BP_m4GO:005043amyloid-b4/727     | 38/23843  | 0.027869 | 0.592594 | 0.583728 | Nat8f1/Efn   |
| GO_BP_m4GO:00067C steroid cat:3/727 | 22/23843  | 0.028242 | 0.592594 | 0.583728 | Akr1d1/Cy1   |
| GO_BP_m4GO:004414negative re3/727   | 22/23843  | 0.028242 | 0.592594 | 0.583728 | Mbl1/Mbl2    |
| GO_BP_m4GO:005179regulation 3/727   | 22/23843  | 0.028242 | 0.592594 | 0.583728 | Cdh3/Fst/Ir  |
| GO_BP_m4GO:007147cellular hyp3/727  | 22/23843  | 0.028242 | 0.592594 | 0.583728 | Mir29b-1/I   |
| GO_BP_m4GO:000697response tr6/727   | 76/23843  | 0.028434 | 0.592594 | 0.583728 | Mir29b-1/I   |
| GO_BP_m4GO:001584organic aci15/727  | 284/23843 | 0.028481 | 0.592594 | 0.583728 | Abcb4/Abc    |
| GO_BP_m4GO:19037C regulation 19/727 | 386/23843 | 0.028607 | 0.592594 | 0.583728 | Ager/Btn2a   |
| GO_BP_m4GO:000267respiratory 2/727  | 9/23843   | 0.028993 | 0.592594 | 0.583728 | Dusp10/Mj    |
| GO_BP_m4GO:00067C cholesterol 2/727 | 9/23843   | 0.028993 | 0.592594 | 0.583728 | Akr1d1/Cy1   |
| GO_BP_m4GO:001612sterol catal2/727  | 9/23843   | 0.028993 | 0.592594 | 0.583728 | Akr1d1/Cy1   |
| GO_BP_m4GO:003437triglyceride2/727  | 9/23843   | 0.028993 | 0.592594 | 0.583728 | Apoa4/Lipc   |
| GO_BP_m4GO:003437low-densit2/727    | 9/23843   | 0.028993 | 0.592594 | 0.583728 | Lipc/Mpo     |
| GO_BP_m4GO:004243ethanolami2/727    | 9/23843   | 0.028993 | 0.592594 | 0.583728 | Abhd4/Gd1    |
| GO_BP_m4GO:00610C common b 2/727    | 9/23843   | 0.028993 | 0.592594 | 0.583728 | Gak/Sox17    |
| GO_BP_m4GO:00713C cellular res2/727 | 9/23843   | 0.028993 | 0.592594 | 0.583728 | Pim1/Vdr     |
| GO_BP_m4GO:007139cellular res2/727  | 9/23843   | 0.028993 | 0.592594 | 0.583728 | Inhba/Mlc1   |
| GO_BP_m4GO:007163negative re2/727   | 9/23843   | 0.028993 | 0.592594 | 0.583728 | Cdh3/Il13    |
| GO_BP_m4GO:190037regulation 2/727   | 9/23843   | 0.028993 | 0.592594 | 0.583728 | Cdh3/Zeb2    |
| GO_BP_m4GO:190343positive re2/727   | 9/23843   | 0.028993 | 0.592594 | 0.583728 | Aurka/Ret    |
| GO_BP_m4GO:002261ribonucleo12/727   | 212/23843 | 0.029861 | 0.592594 | 0.583728 | Cnot6/Eif3:  |
| GO_BP_m4GO:000002ribosomal l4/727   | 39/23843  | 0.030328 | 0.592594 | 0.583728 | Gm5093/N     |
| GO_BP_m4GO:004274hydrogen r4/727    | 39/23843  | 0.030328 | 0.592594 | 0.583728 | Apoa4/Cyc    |
| GO_BP_m4GO:004576regulation 4/727   | 39/23843  | 0.030328 | 0.592594 | 0.583728 | Cap2/Gng1    |
| GO_BP_m4GO:000157globoside l1/727   | 1/23843   | 0.030491 | 0.592594 | 0.583728 | A4galt       |
| GO_BP_m4GO:000214hypochlorc 1/727   | 1/23843   | 0.030491 | 0.592594 | 0.583728 | Mpo          |
| GO_BP_m4GO:000214hypochlorc 1/727   | 1/23843   | 0.030491 | 0.592594 | 0.583728 | Mpo          |
| GO_BP_m4GO:000241T cell medi 1/727  | 1/23843   | 0.030491 | 0.592594 | 0.583728 | Muc4         |
| GO_BP_m4GO:000246tolerance ir1/727  | 1/23843   | 0.030491 | 0.592594 | 0.583728 | C3ar1        |
| GO_BP_m4GO:000254Factor XII a1/727  | 1/23843   | 0.030491 | 0.592594 | 0.583728 | F12          |
| GO_BP_m4GO:000284negative re1/727   | 1/23843   | 0.030491 | 0.592594 | 0.583728 | Muc4         |
| GO_BP_m4GO:000285regulation 1/727   | 1/23843   | 0.030491 | 0.592594 | 0.583728 | Muc4         |
| GO_BP_m4GO:000285negative re1/727   | 1/23843   | 0.030491 | 0.592594 | 0.583728 | Muc4         |
| GO_BP_m4GO:000314cardiogenic1/727   | 1/23843   | 0.030491 | 0.592594 | 0.583728 | Sox17        |

|                                                       |       |         |          |          |          |           |
|-------------------------------------------------------|-------|---------|----------|----------|----------|-----------|
| GO_BP_m4GO:000314neural cres                          | 1/727 | 1/23843 | 0.030491 | 0.592594 | 0.583728 | Folr1     |
| GO_BP_m4GO:000686purine nucleoside                    | 1/727 | 1/23843 | 0.030491 | 0.592594 | 0.583728 | Aqp9      |
| GO_BP_m4GO:000982alkaloid metabolite                  | 1/727 | 1/23843 | 0.030491 | 0.592594 | 0.583728 | Cyp1a2    |
| GO_BP_m4GO:001041mannan molecule                      | 1/727 | 1/23843 | 0.030491 | 0.592594 | 0.583728 | Manba     |
| GO_BP_m4GO:001049intercellular junction               | 1/727 | 1/23843 | 0.030491 | 0.592594 | 0.583728 | Mip       |
| GO_BP_m4GO:001059glutamine transport                  | 1/727 | 1/23843 | 0.030491 | 0.592594 | 0.583728 | Slc1a5    |
| GO_BP_m4GO:001086negative regulation of cell growth   | 1/727 | 1/23843 | 0.030491 | 0.592594 | 0.583728 | Sik1      |
| GO_BP_m4GO:001582threonine transport                  | 1/727 | 1/23843 | 0.030491 | 0.592594 | 0.583728 | Slc1a4    |
| GO_BP_m4GO:001593coenzyme C12                         | 1/727 | 1/23843 | 0.030491 | 0.592594 | 0.583728 | Nudt7     |
| GO_BP_m4GO:001930D-ribose catabolism                  | 1/727 | 1/23843 | 0.030491 | 0.592594 | 0.583728 | Nudt5     |
| GO_BP_m4GO:003022basophil degranulation               | 1/727 | 1/23843 | 0.030491 | 0.592594 | 0.583728 | Gata1     |
| GO_BP_m4GO:003155regulation of cell growth            | 1/727 | 1/23843 | 0.030491 | 0.592594 | 0.583728 | Fam72a    |
| GO_BP_m4GO:003156negative regulation of cell growth   | 1/727 | 1/23843 | 0.030491 | 0.592594 | 0.583728 | Fam72a    |
| GO_BP_m4GO:003260connective tissue cell               | 1/727 | 1/23843 | 0.030491 | 0.592594 | 0.583728 | Il13      |
| GO_BP_m4GO:003264regulation of cell growth            | 1/727 | 1/23843 | 0.030491 | 0.592594 | 0.583728 | Il13      |
| GO_BP_m4GO:003272positive regulation of cell growth   | 1/727 | 1/23843 | 0.030491 | 0.592594 | 0.583728 | Il13      |
| GO_BP_m4GO:003277regulation of cell growth            | 1/727 | 1/23843 | 0.030491 | 0.592594 | 0.583728 | Cdh3      |
| GO_BP_m4GO:003277positive regulation of cell growth   | 1/727 | 1/23843 | 0.030491 | 0.592594 | 0.583728 | Cdh3      |
| GO_BP_m4GO:003348cholesterol transport                | 1/727 | 1/23843 | 0.030491 | 0.592594 | 0.583728 | Cyp51     |
| GO_BP_m4GO:003386nucleoside transport                 | 1/727 | 1/23843 | 0.030491 | 0.592594 | 0.583728 | Nudt7     |
| GO_BP_m4GO:003403ribonucleoside transport             | 1/727 | 1/23843 | 0.030491 | 0.592594 | 0.583728 | Nudt7     |
| GO_BP_m4GO:003403purine nucleoside transport          | 1/727 | 1/23843 | 0.030491 | 0.592594 | 0.583728 | Nudt7     |
| GO_BP_m4GO:003434response to hypoxia                  | 1/727 | 1/23843 | 0.030491 | 0.592594 | 0.583728 | A230050P2 |
| GO_BP_m4GO:003451response to hypoxia                  | 1/727 | 1/23843 | 0.030491 | 0.592594 | 0.583728 | Kynu      |
| GO_BP_m4GO:003458hydroxyproline transport             | 1/727 | 1/23843 | 0.030491 | 0.592594 | 0.583728 | Slc1a4    |
| GO_BP_m4GO:003819thyroid-stimulating hormone receptor | 1/727 | 1/23843 | 0.030491 | 0.592594 | 0.583728 | Tshr      |
| GO_BP_m4GO:004342anthranilate transport               | 1/727 | 1/23843 | 0.030491 | 0.592594 | 0.583728 | Kynu      |
| GO_BP_m4GO:004412positive regulation of cell growth   | 1/727 | 1/23843 | 0.030491 | 0.592594 | 0.583728 | Osbp      |
| GO_BP_m4GO:004414positive regulation of cell growth   | 1/727 | 1/23843 | 0.030491 | 0.592594 | 0.583728 | Osbp      |
| GO_BP_m4GO:004432regulation of cell growth            | 1/727 | 1/23843 | 0.030491 | 0.592594 | 0.583728 | Ddit3     |
| GO_BP_m4GO:004635mannan catabolism                    | 1/727 | 1/23843 | 0.030491 | 0.592594 | 0.583728 | Manba     |
| GO_BP_m4GO:004668response to hypoxia                  | 1/727 | 1/23843 | 0.030491 | 0.592594 | 0.583728 | Mt1       |
| GO_BP_m4GO:004867collateral sprouting                 | 1/727 | 1/23843 | 0.030491 | 0.592594 | 0.583728 | Rtn4      |
| GO_BP_m4GO:004868formation of cell-cell junction      | 1/727 | 1/23843 | 0.030491 | 0.592594 | 0.583728 | Rtn4      |
| GO_BP_m4GO:004869regulation of cell growth            | 1/727 | 1/23843 | 0.030491 | 0.592594 | 0.583728 | Rtn4      |
| GO_BP_m4GO:004869positive regulation of cell growth   | 1/727 | 1/23843 | 0.030491 | 0.592594 | 0.583728 | Rtn4      |
| GO_BP_m4GO:004885adenohypophyseal hormone             | 1/727 | 1/23843 | 0.030491 | 0.592594 | 0.583728 | Duox2     |
| GO_BP_m4GO:005168maintenance of cell growth           | 1/727 | 1/23843 | 0.030491 | 0.592594 | 0.583728 | Polr2m    |
| GO_BP_m4GO:005179negative regulation of cell growth   | 1/727 | 1/23843 | 0.030491 | 0.592594 | 0.583728 | Cdh3      |
| GO_BP_m4GO:006080regulation of cell growth            | 1/727 | 1/23843 | 0.030491 | 0.592594 | 0.583728 | Sox17     |
| GO_BP_m4GO:006090regulation of cell growth            | 1/727 | 1/23843 | 0.030491 | 0.592594 | 0.583728 | Cdh3      |
| GO_BP_m4GO:006148response to hypoxia                  | 1/727 | 1/23843 | 0.030491 | 0.592594 | 0.583728 | Rps3      |
| GO_BP_m4GO:006171anterior neural plate                | 1/727 | 1/23843 | 0.030491 | 0.592594 | 0.583728 | Folr1     |
| GO_BP_m4GO:007092regulation of cell growth            | 1/727 | 1/23843 | 0.030491 | 0.592594 | 0.583728 | Ripk1     |
| GO_BP_m4GO:007123cellular response to hypoxia         | 1/727 | 1/23843 | 0.030491 | 0.592594 | 0.583728 | Folr1     |
| GO_BP_m4GO:007124cellular response to hypoxia         | 1/727 | 1/23843 | 0.030491 | 0.592594 | 0.583728 | Mt1       |
| GO_BP_m4GO:007146cellular response to hypoxia         | 1/727 | 1/23843 | 0.030491 | 0.592594 | 0.583728 | Vasn      |
| GO_BP_m4GO:007161oxidative DNA damage                 | 1/727 | 1/23843 | 0.030491 | 0.592594 | 0.583728 | Cyp1a2    |

|                   |                                                 |         |          |          |          |         |
|-------------------|-------------------------------------------------|---------|----------|----------|----------|---------|
| GO_BP_m4GO:009046 | glutamate 1/727                                 | 1/23843 | 0.030491 | 0.592594 | 0.583728 | Kctd7   |
| GO_BP_m4GO:009724 | hematopoiesis 1/727                             | 1/23843 | 0.030491 | 0.592594 | 0.583728 | Gas6    |
| GO_BP_m4GO:009725 | regulation 1/727                                | 1/23843 | 0.030491 | 0.592594 | 0.583728 | Hp1bp3  |
| GO_BP_m4GO:009740 | cellular response to hypoxia 1/727              | 1/23843 | 0.030491 | 0.592594 | 0.583728 | Zfp3611 |
| GO_BP_m4GO:009765 | vascular endothelial cell proliferation 1/727   | 1/23843 | 0.030491 | 0.592594 | 0.583728 | Socs5   |
| GO_BP_m4GO:009915 | regulation 1/727                                | 1/23843 | 0.030491 | 0.592594 | 0.583728 | Tiam1   |
| GO_BP_m4GO:190154 | response to hypoxia 1/727                       | 1/23843 | 0.030491 | 0.592594 | 0.583728 | Zfp3611 |
| GO_BP_m4GO:190155 | response to hypoxia 1/727                       | 1/23843 | 0.030491 | 0.592594 | 0.583728 | Abcb4   |
| GO_BP_m4GO:190227 | positive regulation of cell proliferation 1/727 | 1/23843 | 0.030491 | 0.592594 | 0.583728 | Vamp8   |
| GO_BP_m4GO:190254 | positive regulation of cell proliferation 1/727 | 1/23843 | 0.030491 | 0.592594 | 0.583728 | Rps3    |
| GO_BP_m4GO:190274 | positive regulation of cell proliferation 1/727 | 1/23843 | 0.030491 | 0.592594 | 0.583728 | Zeb2    |
| GO_BP_m4GO:190291 | positive regulation of cell proliferation 1/727 | 1/23843 | 0.030491 | 0.592594 | 0.583728 | Cdh3    |
| GO_BP_m4GO:190318 | regulation 1/727                                | 1/23843 | 0.030491 | 0.592594 | 0.583728 | Ube2i   |
| GO_BP_m4GO:190338 | regulation 1/727                                | 1/23843 | 0.030491 | 0.592594 | 0.583728 | Ptpn23  |
| GO_BP_m4GO:190339 | positive regulation of cell proliferation 1/727 | 1/23843 | 0.030491 | 0.592594 | 0.583728 | Ptpn23  |
| GO_BP_m4GO:190375 | positive regulation of cell proliferation 1/727 | 1/23843 | 0.030491 | 0.592594 | 0.583728 | Ube2i   |
| GO_BP_m4GO:190376 | negative regulation of cell proliferation 1/727 | 1/23843 | 0.030491 | 0.592594 | 0.583728 | Lgals3  |
| GO_BP_m4GO:190380 | L-glutamine transport 1/727                     | 1/23843 | 0.030491 | 0.592594 | 0.583728 | Slc1a5  |
| GO_BP_m4GO:190426 | regulation 1/727                                | 1/23843 | 0.030491 | 0.592594 | 0.583728 | Tiam1   |
| GO_BP_m4GO:190427 | positive regulation of cell proliferation 1/727 | 1/23843 | 0.030491 | 0.592594 | 0.583728 | Tiam1   |
| GO_BP_m4GO:190458 | cellular response to hypoxia 1/727              | 1/23843 | 0.030491 | 0.592594 | 0.583728 | Tshr    |
| GO_BP_m4GO:190459 | regulation 1/727                                | 1/23843 | 0.030491 | 0.592594 | 0.583728 | Ager    |
| GO_BP_m4GO:190459 | negative regulation of cell proliferation 1/727 | 1/23843 | 0.030491 | 0.592594 | 0.583728 | Ager    |
| GO_BP_m4GO:190460 | regulation 1/727                                | 1/23843 | 0.030491 | 0.592594 | 0.583728 | Ager    |
| GO_BP_m4GO:190460 | negative regulation of cell proliferation 1/727 | 1/23843 | 0.030491 | 0.592594 | 0.583728 | Ager    |
| GO_BP_m4GO:190460 | positive regulation of cell proliferation 1/727 | 1/23843 | 0.030491 | 0.592594 | 0.583728 | Ager    |
| GO_BP_m4GO:190480 | regulation 1/727                                | 1/23843 | 0.030491 | 0.592594 | 0.583728 | Trabd2b |
| GO_BP_m4GO:190480 | positive regulation of cell proliferation 1/727 | 1/23843 | 0.030491 | 0.592594 | 0.583728 | Trabd2b |
| GO_BP_m4GO:190498 | regulation 1/727                                | 1/23843 | 0.030491 | 0.592594 | 0.583728 | Acmsd   |
| GO_BP_m4GO:190498 | negative regulation of cell proliferation 1/727 | 1/23843 | 0.030491 | 0.592594 | 0.583728 | Acmsd   |
| GO_BP_m4GO:190498 | regulation 1/727                                | 1/23843 | 0.030491 | 0.592594 | 0.583728 | Socs5   |
| GO_BP_m4GO:190498 | negative regulation of cell proliferation 1/727 | 1/23843 | 0.030491 | 0.592594 | 0.583728 | Socs5   |
| GO_BP_m4GO:190504 | negative regulation of cell proliferation 1/727 | 1/23843 | 0.030491 | 0.592594 | 0.583728 | Dusp10  |
| GO_BP_m4GO:190506 | positive regulation of cell proliferation 1/727 | 1/23843 | 0.030491 | 0.592594 | 0.583728 | Pim1    |
| GO_BP_m4GO:190522 | response to hypoxia 1/727                       | 1/23843 | 0.030491 | 0.592594 | 0.583728 | Tshr    |
| GO_BP_m4GO:190522 | cellular response to hypoxia 1/727              | 1/23843 | 0.030491 | 0.592594 | 0.583728 | Tshr    |
| GO_BP_m4GO:190523 | regulation 1/727                                | 1/23843 | 0.030491 | 0.592594 | 0.583728 | Tnn     |
| GO_BP_m4GO:190524 | negative regulation of cell proliferation 1/727 | 1/23843 | 0.030491 | 0.592594 | 0.583728 | Tnn     |
| GO_BP_m4GO:190527 | regulation 1/727                                | 1/23843 | 0.030491 | 0.592594 | 0.583728 | Tiam1   |
| GO_BP_m4GO:190535 | spine apparatus organization 1/727              | 1/23843 | 0.030491 | 0.592594 | 0.583728 | Synpo   |
| GO_BP_m4GO:190557 | regulation 1/727                                | 1/23843 | 0.030491 | 0.592594 | 0.583728 | Rtn4    |
| GO_BP_m4GO:190558 | positive regulation of cell proliferation 1/727 | 1/23843 | 0.030491 | 0.592594 | 0.583728 | Rtn4    |
| GO_BP_m4GO:190587 | invadopodium formation 1/727                    | 1/23843 | 0.030491 | 0.592594 | 0.583728 | Nav3    |
| GO_BP_m4GO:190592 | regulation 1/727                                | 1/23843 | 0.030491 | 0.592594 | 0.583728 | Nav3    |
| GO_BP_m4GO:190592 | positive regulation of cell proliferation 1/727 | 1/23843 | 0.030491 | 0.592594 | 0.583728 | Nav3    |
| GO_BP_m4GO:190594 | regulation 1/727                                | 1/23843 | 0.030491 | 0.592594 | 0.583728 | Rtn4    |
| GO_BP_m4GO:190594 | negative regulation of cell proliferation 1/727 | 1/23843 | 0.030491 | 0.592594 | 0.583728 | Rtn4    |
| GO_BP_m4GO:199034 | gap junction assembly 1/727                     | 1/23843 | 0.030491 | 0.592594 | 0.583728 | Mip     |

|                                     |           |          |          |          |             |
|-------------------------------------|-----------|----------|----------|----------|-------------|
| GO_BP_m4GO:199075Schwann c1/727     | 1/23843   | 0.030491 | 0.592594 | 0.583728 | Tiam1       |
| GO_BP_m4GO:200023positive re1/727   | 1/23843   | 0.030491 | 0.592594 | 0.583728 | Il13        |
| GO_BP_m4GO:200127positive re1/727   | 1/23843   | 0.030491 | 0.592594 | 0.583728 | Rps3        |
| GO_BP_m4GO:004253hyperosmc3/727     | 23/23843  | 0.031761 | 0.614773 | 0.605576 | Mir29b-1/I  |
| GO_BP_m4GO:003806p38MAPK c4/727     | 40/23843  | 0.032912 | 0.618787 | 0.60953  | Ager/Dusp   |
| GO_BP_m4GO:007083divalent m21/727   | 445/23843 | 0.033002 | 0.618787 | 0.60953  | Cacna1b/C   |
| GO_BP_m4GO:007023T cell apop5/727   | 59/23843  | 0.033694 | 0.618787 | 0.60953  | Bcl10/Efna1 |
| GO_BP_m4GO:190465glucose tra8/727   | 123/23843 | 0.03482  | 0.618787 | 0.60953  | C1qtnf12/F  |
| GO_BP_m4GO:007251divalent inc21/727 | 448/23843 | 0.035081 | 0.618787 | 0.60953  | Cacna1b/C   |
| GO_BP_m4GO:000637mRNA spli3/727     | 24/23843  | 0.035498 | 0.618787 | 0.60953  | Luc7l3/Snrp |
| GO_BP_m4GO:00302C heparan su3/727   | 24/23843  | 0.035498 | 0.618787 | 0.60953  | Lipc/Pxylp1 |
| GO_BP_m4GO:004605UTP metab2/727     | 10/23843  | 0.03552  | 0.618787 | 0.60953  | Ak3/Nme5    |
| GO_BP_m4GO:006021primitive h2/727   | 10/23843  | 0.03552  | 0.618787 | 0.60953  | Gata1/Tho1  |
| GO_BP_m4GO:007039response t2/727    | 10/23843  | 0.03552  | 0.618787 | 0.60953  | Mapk14/Rc3  |
| GO_BP_m4GO:007122cellular res2/727  | 10/23843  | 0.03552  | 0.618787 | 0.60953  | Mapk14/Rc3  |
| GO_BP_m4GO:007125cellular res2/727  | 10/23843  | 0.03552  | 0.618787 | 0.60953  | Gnat1/Grmc  |
| GO_BP_m4GO:009012positive re2/727   | 10/23843  | 0.03552  | 0.618787 | 0.60953  | Anapc2/Ne   |
| GO_BP_m4GO:005159positive re4/727   | 41/23843  | 0.03562  | 0.618787 | 0.60953  | Cacna1b/H   |
| GO_BP_m4GO:007147cellular res4/727  | 41/23843  | 0.03562  | 0.618787 | 0.60953  | Mir29b-1/I  |
| GO_BP_m4GO:000276positive re5/727   | 60/23843  | 0.03587  | 0.618787 | 0.60953  | Car2/Il34/F |
| GO_BP_m4GO:000685drug trans5/727    | 60/23843  | 0.03587  | 0.618787 | 0.60953  | Abcc4/Slc1  |
| GO_BP_m4GO:000686lipid transp16/727 | 319/23843 | 0.036428 | 0.618787 | 0.60953  | Abcb4/Abc   |
| GO_BP_m4GO:004632regulation 10/727  | 171/23843 | 0.037228 | 0.618787 | 0.60953  | Ager/Dusp   |
| GO_BP_m4GO:00705C calcium ior6/727  | 81/23843  | 0.037239 | 0.618787 | 0.60953  | Cacna1b/C   |
| GO_BP_m4GO:000864hexose trar8/727   | 125/23843 | 0.037762 | 0.618787 | 0.60953  | C1qtnf12/F  |
| GO_BP_m4GO:003109regeneratic8/727   | 125/23843 | 0.037762 | 0.618787 | 0.60953  | Apoa4/Aur   |
| GO_BP_m4GO:000681calcium ior19/727  | 399/23843 | 0.038047 | 0.618787 | 0.60953  | Cacna1b/C   |
| GO_BP_m4GO:00444C symbiont p17/727  | 347/23843 | 0.038334 | 0.618787 | 0.60953  | A230050P2   |
| GO_BP_m4GO:001572bile acid ar3/727  | 25/23843  | 0.039451 | 0.618787 | 0.60953  | Aqp9/Mip/   |
| GO_BP_m4GO:003134negative re3/727   | 25/23843  | 0.039451 | 0.618787 | 0.60953  | Il13/Muc4/  |
| GO_BP_m4GO:004564positive re3/727   | 25/23843  | 0.039451 | 0.618787 | 0.60953  | Gata1/Inhb  |
| GO_BP_m4GO:001571organic ani19/727  | 402/23843 | 0.040517 | 0.618787 | 0.60953  | Abcb4/Abc   |
| GO_BP_m4GO:003287positive re9/727   | 150/23843 | 0.040675 | 0.618787 | 0.60953  | Ager/Ern2/  |
| GO_BP_m4GO:001574monosaccl8/727     | 127/23843 | 0.040866 | 0.618787 | 0.60953  | C1qtnf12/F  |
| GO_BP_m4GO:008601membrane 4/727     | 43/23843  | 0.041412 | 0.618787 | 0.60953  | Cacna1b/C   |
| GO_BP_m4GO:190551macrophaç4/727     | 43/23843  | 0.041412 | 0.618787 | 0.60953  | C3ar1/Lgal  |
| GO_BP_m4GO:007182ribonucleo12/727   | 223/23843 | 0.041455 | 0.618787 | 0.60953  | Cnot6/Eif3: |
| GO_BP_m4GO:001095positive re9/727   | 151/23843 | 0.042138 | 0.618787 | 0.60953  | Bcl10/Cyca  |
| GO_BP_m4GO:00703C positive re9/727  | 151/23843 | 0.042138 | 0.618787 | 0.60953  | Ager/Ern2/  |
| GO_BP_m4GO:000186complemei2/727     | 11/23843  | 0.042551 | 0.618787 | 0.60953  | Mbl1/Mbl2   |
| GO_BP_m4GO:000698ER overloa2/727    | 11/23843  | 0.042551 | 0.618787 | 0.60953  | Ddit3/Ppp1  |
| GO_BP_m4GO:199044positive re2/727   | 11/23843  | 0.042551 | 0.618787 | 0.60953  | Atf6b/Ddit: |
| GO_BP_m4GO:200003regulation 2/727   | 11/23843  | 0.042551 | 0.618787 | 0.60953  | Sox17/Tho   |
| GO_BP_m4GO:200057regulation 2/727   | 11/23843  | 0.042551 | 0.618787 | 0.60953  | Dynll2/Mtc  |
| GO_BP_m4GO:004227ribosomal l6/727   | 84/23843  | 0.043274 | 0.618787 | 0.60953  | Gm5093/M    |
| GO_BP_m4GO:007209regulation 6/727   | 84/23843  | 0.043274 | 0.618787 | 0.60953  | Ctnna1/Nf:  |
| GO_BP_m4GO:007135cellular res3/727  | 26/23843  | 0.043616 | 0.618787 | 0.60953  | Mir155/Pid  |
| GO_BP_m4GO:004819Golgi vesic 13/727 | 250/23843 | 0.043802 | 0.618787 | 0.60953  | Arf3/Bet1l/ |

|                                      |           |          |          |         |             |
|--------------------------------------|-----------|----------|----------|---------|-------------|
| GO_BP_m4GO:000669cholesterol4/727    | 44/23843  | 0.044496 | 0.618787 | 0.60953 | Apoa4/Cyp   |
| GO_BP_m4GO:005076positive reç5/727   | 64/23843  | 0.045427 | 0.618787 | 0.60953 | Ager/Gas6,  |
| GO_BP_m4GO:003421carbohydrate8/727   | 130/23843 | 0.045833 | 0.618787 | 0.60953 | C1qtnf12/F  |
| GO_BP_m4GO:007137cellular resç12/727 | 227/23843 | 0.046358 | 0.618787 | 0.60953 | Car2/C1qtr  |
| GO_BP_m4GO:001046regulation 7/727    | 108/23843 | 0.047366 | 0.618787 | 0.60953 | Ager/Arc/F  |
| GO_BP_m4GO:003238positive reç13/727  | 253/23843 | 0.047368 | 0.618787 | 0.60953 | Cdh3/Erbb   |
| GO_BP_m4GO:000763feeding be 8/727    | 131/23843 | 0.047573 | 0.618787 | 0.60953 | Dmbx1/Esr   |
| GO_BP_m4GO:004230molting cycle8/727  | 131/23843 | 0.047573 | 0.618787 | 0.60953 | Cdh3/Fst/Ir |
| GO_BP_m4GO:004263hair cycle 8/727    | 131/23843 | 0.047573 | 0.618787 | 0.60953 | Cdh3/Fst/Ir |
| GO_BP_m4GO:004632positive reç4/727   | 45/23843  | 0.047705 | 0.618787 | 0.60953 | C1qtnf12/F  |
| GO_BP_m4GO:006100regulation 4/727    | 45/23843  | 0.047705 | 0.618787 | 0.60953 | Arc/Efna1/  |
| GO_BP_m4GO:001087lipid localiz17/727 | 357/23843 | 0.047791 | 0.618787 | 0.60953 | Abcb4/Abc   |
| GO_BP_m4GO:007163regulation 3/727    | 27/23843  | 0.047992 | 0.618787 | 0.60953 | Cdh3/Il13/I |
| GO_BP_m4GO:004328regulation 11/727   | 204/23843 | 0.048879 | 0.618787 | 0.60953 | Anp32b/Bc   |
| GO_BP_m4GO:004441interspecie 19/727  | 412/23843 | 0.049592 | 0.618787 | 0.60953 | A230050P2   |
| GO_BP_m4GO:003286cellular resç10/727 | 180/23843 | 0.049726 | 0.618787 | 0.60953 | C1qtnf12/F  |
| GO_BP_m4GO:000315endocardial 2/727   | 12/23843  | 0.05005  | 0.618787 | 0.60953 | Ovol2/Sox3  |
| GO_BP_m4GO:000920pyrimidine 2/727    | 12/23843  | 0.05005  | 0.618787 | 0.60953 | Ak3/Nme5    |
| GO_BP_m4GO:003029intestinal cl2/727  | 12/23843  | 0.05005  | 0.618787 | 0.60953 | Apoa4/Npr   |
| GO_BP_m4GO:003328response tr2/727    | 12/23843  | 0.05005  | 0.618787 | 0.60953 | Pim1/Vdr    |
| GO_BP_m4GO:003424negative re2/727    | 12/23843  | 0.05005  | 0.618787 | 0.60953 | Nelfe/Recq  |
| GO_BP_m4GO:003631cellular resç2/727  | 12/23843  | 0.05005  | 0.618787 | 0.60953 | Inhba/Mlc1  |
| GO_BP_m4GO:004562regulation 2/727    | 12/23843  | 0.05005  | 0.618787 | 0.60953 | Il27/Socs5  |
| GO_BP_m4GO:009019positive reç2/727   | 12/23843  | 0.05005  | 0.618787 | 0.60953 | C3ar1/Ret   |
| GO_BP_m4GO:200000negative re2/727    | 12/23843  | 0.05005  | 0.618787 | 0.60953 | Astn2/Ned   |
| GO_BP_m4GO:000333amino acid5/727     | 66/23843  | 0.050722 | 0.618787 | 0.60953 | Slc16a12/S  |
| GO_BP_m4GO:006109regulation 5/727    | 66/23843  | 0.050722 | 0.618787 | 0.60953 | Efna1/Fam   |
| GO_BP_m4GO:000641tRNA amin4/727      | 46/23843  | 0.051039 | 0.618787 | 0.60953 | Dalrd3/Ear  |
| GO_BP_m4GO:190265secondary 4/727     | 46/23843  | 0.051039 | 0.618787 | 0.60953 | Apoa4/Cyp   |
| GO_BP_m4GO:200004regulation 7/727    | 110/23843 | 0.051383 | 0.618787 | 0.60953 | Anp32b/Bt   |
| GO_BP_m4GO:006099regulation 6/727    | 88/23843  | 0.052223 | 0.618787 | 0.60953 | Arc/Efna1/  |
| GO_BP_m4GO:190165cellular resç13/727 | 257/23843 | 0.052427 | 0.618787 | 0.60953 | Ager/Car2/  |
| GO_BP_m4GO:000621pyrimidine 3/727    | 28/23843  | 0.052575 | 0.618787 | 0.60953 | Ak3/Nme5    |
| GO_BP_m4GO:001071negative re3/727    | 28/23843  | 0.052575 | 0.618787 | 0.60953 | Efna1/Ovol  |
| GO_BP_m4GO:003022monocyte 3/727      | 28/23843  | 0.052575 | 0.618787 | 0.60953 | Il34/Thoc5, |
| GO_BP_m4GO:004455secondary 3/727     | 28/23843  | 0.052575 | 0.618787 | 0.60953 | Cdh3/Cyp1   |
| GO_BP_m4GO:005065chondroitin3/727    | 28/23843  | 0.052575 | 0.618787 | 0.60953 | Pxylp1/Spc  |
| GO_BP_m4GO:007074response tr3/727    | 28/23843  | 0.052575 | 0.618787 | 0.60953 | Mir155/Pid  |
| GO_BP_m4GO:007160transformir3/727    | 28/23843  | 0.052575 | 0.618787 | 0.60953 | Cdh3/Il13/I |
| GO_BP_m4GO:190313mononucle3/727      | 28/23843  | 0.052575 | 0.618787 | 0.60953 | Il34/Thoc5, |
| GO_BP_m4GO:200027negative re3/727    | 28/23843  | 0.052575 | 0.618787 | 0.60953 | Ager/Fam7   |
| GO_BP_m4GO:200027positive reç3/727   | 28/23843  | 0.052575 | 0.618787 | 0.60953 | Ager/Arc/N  |
| GO_BP_m4GO:000194hair follicle 7/727 | 111/23843 | 0.053469 | 0.618787 | 0.60953 | Cdh3/Fst/Ir |
| GO_BP_m4GO:004564regulation 4/727    | 47/23843  | 0.054497 | 0.618787 | 0.60953 | Gata1/Inhb  |
| GO_BP_m4GO:199082response tr15/727   | 311/23843 | 0.055181 | 0.618787 | 0.60953 | Abcg4/Fgf4  |
| GO_BP_m4GO:199083cellular resç15/727 | 311/23843 | 0.055181 | 0.618787 | 0.60953 | Abcg4/Fgf4  |
| GO_BP_m4GO:003476positive reç11/727  | 209/23843 | 0.056258 | 0.618787 | 0.60953 | Ager/Arc/C  |
| GO_BP_m4GO:007037negative re5/727    | 68/23843  | 0.056363 | 0.618787 | 0.60953 | Btn2a2/Cnl  |

|                               |        |           |          |          |         |             |
|-------------------------------|--------|-----------|----------|----------|---------|-------------|
| GO_BP_m4GO:00435εskin develc  | 14/727 | 286/23843 | 0.056605 | 0.618787 | 0.60953 | Cdh3/Dsp/   |
| GO_BP_m4GO:00068εamino acid   | 8/727  | 136/23843 | 0.056913 | 0.618787 | 0.60953 | Htr2c/Slc1f |
| GO_BP_m4GO:009877skin epider  | 7/727  | 113/23843 | 0.057799 | 0.618787 | 0.60953 | Cdh3/Fst/Ir |
| GO_BP_m4GO:00082εintracellula | 2/727  | 13/23843  | 0.057982 | 0.618787 | 0.60953 | Mthfsd/Zfc  |
| GO_BP_m4GO:001932pentose m    | 2/727  | 13/23843  | 0.057982 | 0.618787 | 0.60953 | Nudt5/Oto   |
| GO_BP_m4GO:001975one-carbo    | 2/727  | 13/23843  | 0.057982 | 0.618787 | 0.60953 | Car2/Car4   |
| GO_BP_m4GO:00455εpositive re  | 2/727  | 13/23843  | 0.057982 | 0.618787 | 0.60953 | Btn2a2/Du   |
| GO_BP_m4GO:00460εAMP metal    | 2/727  | 13/23843  | 0.057982 | 0.618787 | 0.60953 | Ak3/Prps2   |
| GO_BP_m4GO:009012regulation   | 2/727  | 13/23843  | 0.057982 | 0.618787 | 0.60953 | Anapc2/Ne   |
| GO_BP_m4GO:00903εregulation   | 2/727  | 13/23843  | 0.057982 | 0.618787 | 0.60953 | Dusp10/Mi   |
| GO_BP_m4GO:00224Cmolting cyc  | 7/727  | 114/23843 | 0.060043 | 0.618787 | 0.60953 | Cdh3/Fst/Ir |
| GO_BP_m4GO:00224Chair cycle   | 7/727  | 114/23843 | 0.060043 | 0.618787 | 0.60953 | Cdh3/Fst/Ir |
| GO_BP_m4GO:00011εRNA polyr    | 1/727  | 2/23843   | 0.060054 | 0.618787 | 0.60953 | Polr1e      |
| GO_BP_m4GO:000157globoside    | 1/727  | 2/23843   | 0.060054 | 0.618787 | 0.60953 | A4galt      |
| GO_BP_m4GO:00017εformation    | 1/727  | 2/23843   | 0.060054 | 0.618787 | 0.60953 | Eif3a       |
| GO_BP_m4GO:00023εplasma kall  | 1/727  | 2/23843   | 0.060054 | 0.618787 | 0.60953 | F12         |
| GO_BP_m4GO:000254activation   | 1/727  | 2/23843   | 0.060054 | 0.618787 | 0.60953 | F12         |
| GO_BP_m4GO:000287positive re  | 1/727  | 2/23843   | 0.060054 | 0.618787 | 0.60953 | Ffar3       |
| GO_BP_m4GO:000334proepicard   | 1/727  | 2/23843   | 0.060054 | 0.618787 | 0.60953 | Zfp3611     |
| GO_BP_m4GO:000334septum tra   | 1/727  | 2/23843   | 0.060054 | 0.618787 | 0.60953 | Zfp3611     |
| GO_BP_m4GO:000642glutamyl-tl  | 1/727  | 2/23843   | 0.060054 | 0.618787 | 0.60953 | Ears2       |
| GO_BP_m4GO:000642isoleucyl-tf | 1/727  | 2/23843   | 0.060054 | 0.618787 | 0.60953 | Iars        |
| GO_BP_m4GO:00067εAMP phos     | 1/727  | 2/23843   | 0.060054 | 0.618787 | 0.60953 | Ak3         |
| GO_BP_m4GO:00069εresponse     | 1/727  | 2/23843   | 0.060054 | 0.618787 | 0.60953 | Apoa4       |
| GO_BP_m4GO:00070εspindle ass  | 1/727  | 2/23843   | 0.060054 | 0.618787 | 0.60953 | Aurka       |
| GO_BP_m4GO:00074εendoderm     | 1/727  | 2/23843   | 0.060054 | 0.618787 | 0.60953 | Sox17       |
| GO_BP_m4GO:00097εcarbohydr    | 1/727  | 2/23843   | 0.060054 | 0.618787 | 0.60953 | Slc2a2      |
| GO_BP_m4GO:001004response     | 1/727  | 2/23843   | 0.060054 | 0.618787 | 0.60953 | Cacna1g     |
| GO_BP_m4GO:00107Cmeiotic DN   | 1/727  | 2/23843   | 0.060054 | 0.618787 | 0.60953 | Brip1       |
| GO_BP_m4GO:00140εregulation   | 1/727  | 2/23843   | 0.060054 | 0.618787 | 0.60953 | Rela        |
| GO_BP_m4GO:001404positive re  | 1/727  | 2/23843   | 0.060054 | 0.618787 | 0.60953 | Rela        |
| GO_BP_m4GO:00148εtransition   | 1/727  | 2/23843   | 0.060054 | 0.618787 | 0.60953 | Gtf2ird1    |
| GO_BP_m4GO:00158εnucleobase   | 1/727  | 2/23843   | 0.060054 | 0.618787 | 0.60953 | Aqp9        |
| GO_BP_m4GO:00158εpyrimidine   | 1/727  | 2/23843   | 0.060054 | 0.618787 | 0.60953 | Aqp9        |
| GO_BP_m4GO:00158εcreatine tr  | 1/727  | 2/23843   | 0.060054 | 0.618787 | 0.60953 | Slc16a12    |
| GO_BP_m4GO:00160εmonoterpe    | 1/727  | 2/23843   | 0.060054 | 0.618787 | 0.60953 | Cyp1a2      |
| GO_BP_m4GO:00165εprotein arg  | 1/727  | 2/23843   | 0.060054 | 0.618787 | 0.60953 | 1700016K1   |
| GO_BP_m4GO:00180Cpeptidyl-ly  | 1/727  | 2/23843   | 0.060054 | 0.618787 | 0.60953 | Nat8f1      |
| GO_BP_m4GO:00188εdibenzo-p    | 1/727  | 2/23843   | 0.060054 | 0.618787 | 0.60953 | Cyp1a2      |
| GO_BP_m4GO:001944tryptophan   | 1/727  | 2/23843   | 0.060054 | 0.618787 | 0.60953 | Kynu        |
| GO_BP_m4GO:00195εarabinose    | 1/727  | 2/23843   | 0.060054 | 0.618787 | 0.60953 | Otog        |
| GO_BP_m4GO:00217εmammillar    | 1/727  | 2/23843   | 0.060054 | 0.618787 | 0.60953 | Zeb2        |
| GO_BP_m4GO:00303εfructosami   | 1/727  | 2/23843   | 0.060054 | 0.618787 | 0.60953 | Mdp1        |
| GO_BP_m4GO:003154regulation   | 1/727  | 2/23843   | 0.060054 | 0.618787 | 0.60953 | Fam72a      |
| GO_BP_m4GO:003154negative re  | 1/727  | 2/23843   | 0.060054 | 0.618787 | 0.60953 | Fam72a      |
| GO_BP_m4GO:00315εphospholi    | 1/727  | 2/23843   | 0.060054 | 0.618787 | 0.60953 | Htr2c       |
| GO_BP_m4GO:003257response     | 1/727  | 2/23843   | 0.060054 | 0.618787 | 0.60953 | Gas6        |
| GO_BP_m4GO:003291negative re  | 1/727  | 2/23843   | 0.060054 | 0.618787 | 0.60953 | Cdh3        |



|                   |                    |         |          |          |         |          |
|-------------------|--------------------|---------|----------|----------|---------|----------|
| GO_BP_m4GO:00331  | negative re1/727   | 2/23843 | 0.060054 | 0.618787 | 0.60953 | Trip12   |
| GO_BP_m4GO:003437 | chylomicro1/727    | 2/23843 | 0.060054 | 0.618787 | 0.60953 | Lipc     |
| GO_BP_m4GO:003437 | chylomicro1/727    | 2/23843 | 0.060054 | 0.618787 | 0.60953 | Plagl2   |
| GO_BP_m4GO:003444 | regulation 1/727   | 2/23843 | 0.060054 | 0.618787 | 0.60953 | Apoa4    |
| GO_BP_m4GO:003444 | negative re1/727   | 2/23843 | 0.060054 | 0.618787 | 0.60953 | Apoa4    |
| GO_BP_m4GO:003544 | dipeptide t1/727   | 2/23843 | 0.060054 | 0.618787 | 0.60953 | Car2     |
| GO_BP_m4GO:003552 | retrograde 1/727   | 2/23843 | 0.060054 | 0.618787 | 0.60953 | Rab43    |
| GO_BP_m4GO:003562 | ER to Golgi1/727   | 2/23843 | 0.060054 | 0.618787 | 0.60953 | Plekha8  |
| GO_BP_m4GO:003585 | eosinophil 1/727   | 2/23843 | 0.060054 | 0.618787 | 0.60953 | Gata1    |
| GO_BP_m4GO:003639 | pancreatic 1/727   | 2/23843 | 0.060054 | 0.618787 | 0.60953 | Vamp8    |
| GO_BP_m4GO:003812 | ERBB3 sign1/727    | 2/23843 | 0.060054 | 0.618787 | 0.60953 | Rtn4     |
| GO_BP_m4GO:003815 | bile acid sig1/727 | 2/23843 | 0.060054 | 0.618787 | 0.60953 | Vdr      |
| GO_BP_m4GO:003815 | urokinase r1/727   | 2/23843 | 0.060054 | 0.618787 | 0.60953 | Slurp1   |
| GO_BP_m4GO:004520 | MAPK expc1/727     | 2/23843 | 0.060054 | 0.618787 | 0.60953 | Styx     |
| GO_BP_m4GO:004604 | ITP metabc1/727    | 2/23843 | 0.060054 | 0.618787 | 0.60953 | Ak3      |
| GO_BP_m4GO:004635 | acetyl-CoA1/727    | 2/23843 | 0.060054 | 0.618787 | 0.60953 | Nudt7    |
| GO_BP_m4GO:004637 | L-arabinos1/727    | 2/23843 | 0.060054 | 0.618787 | 0.60953 | Otog     |
| GO_BP_m4GO:004825 | iron import1/727   | 2/23843 | 0.060054 | 0.618787 | 0.60953 | Slc25a37 |
| GO_BP_m4GO:004865 | negative re1/727   | 2/23843 | 0.060054 | 0.618787 | 0.60953 | Rtn4     |
| GO_BP_m4GO:005134 | positive re1/727   | 2/23843 | 0.060054 | 0.618787 | 0.60953 | Gnat1    |
| GO_BP_m4GO:005164 | endoplasm1/727     | 2/23843 | 0.060054 | 0.618787 | 0.60953 | Polr2m   |
| GO_BP_m4GO:006015 | peroxisomc1/727    | 2/23843 | 0.060054 | 0.618787 | 0.60953 | Pex1     |
| GO_BP_m4GO:006015 | microtubul1/727    | 2/23843 | 0.060054 | 0.618787 | 0.60953 | Pex1     |
| GO_BP_m4GO:006054 | positive re1/727   | 2/23843 | 0.060054 | 0.618787 | 0.60953 | Ripk1    |
| GO_BP_m4GO:006079 | regulation 1/727   | 2/23843 | 0.060054 | 0.618787 | 0.60953 | Sox17    |
| GO_BP_m4GO:006085 | branching 1/727    | 2/23843 | 0.060054 | 0.618787 | 0.60953 | Nfatc1   |
| GO_BP_m4GO:006097 | cell migrati1/727  | 2/23843 | 0.060054 | 0.618787 | 0.60953 | Folr1    |
| GO_BP_m4GO:006137 | mammillar1/727     | 2/23843 | 0.060054 | 0.618787 | 0.60953 | Zeb2     |
| GO_BP_m4GO:007062 | zymogen c1/727     | 2/23843 | 0.060054 | 0.618787 | 0.60953 | Vamp8    |
| GO_BP_m4GO:007130 | cellular res1/727  | 2/23843 | 0.060054 | 0.618787 | 0.60953 | Gas6     |
| GO_BP_m4GO:007234 | pancreatic 1/727   | 2/23843 | 0.060054 | 0.618787 | 0.60953 | Il13     |
| GO_BP_m4GO:009005 | regulation 1/727   | 2/23843 | 0.060054 | 0.618787 | 0.60953 | Car2     |
| GO_BP_m4GO:009005 | regulation 1/727   | 2/23843 | 0.060054 | 0.618787 | 0.60953 | Car2     |
| GO_BP_m4GO:009023 | negative re1/727   | 2/23843 | 0.060054 | 0.618787 | 0.60953 | Aurka    |
| GO_BP_m4GO:009711 | endoplasm1/727     | 2/23843 | 0.060054 | 0.618787 | 0.60953 | Stx17    |
| GO_BP_m4GO:009732 | melanocytc1/727    | 2/23843 | 0.060054 | 0.618787 | 0.60953 | Zeb2     |
| GO_BP_m4GO:009885 | modificatic1/727   | 2/23843 | 0.060054 | 0.618787 | 0.60953 | Synpo    |
| GO_BP_m4GO:009955 | regulation 1/727   | 2/23843 | 0.060054 | 0.618787 | 0.60953 | Grm1     |
| GO_BP_m4GO:190014 | regulation 1/727   | 2/23843 | 0.060054 | 0.618787 | 0.60953 | Gas6     |
| GO_BP_m4GO:190014 | negative re1/727   | 2/23843 | 0.060054 | 0.618787 | 0.60953 | Gas6     |
| GO_BP_m4GO:190014 | positive re1/727   | 2/23843 | 0.060054 | 0.618787 | 0.60953 | Tiam1    |
| GO_BP_m4GO:190019 | positive re1/727   | 2/23843 | 0.060054 | 0.618787 | 0.60953 | Aurka    |
| GO_BP_m4GO:190125 | nucleotide 1/727   | 2/23843 | 0.060054 | 0.618787 | 0.60953 | Xpa      |
| GO_BP_m4GO:190131 | regulation 1/727   | 2/23843 | 0.060054 | 0.618787 | 0.60953 | Trip12   |
| GO_BP_m4GO:190131 | negative re1/727   | 2/23843 | 0.060054 | 0.618787 | 0.60953 | Trip12   |
| GO_BP_m4GO:190227 | regulation 1/727   | 2/23843 | 0.060054 | 0.618787 | 0.60953 | Vamp8    |
| GO_BP_m4GO:190254 | regulation 1/727   | 2/23843 | 0.060054 | 0.618787 | 0.60953 | Rps3     |
| GO_BP_m4GO:190290 | regulation 1/727   | 2/23843 | 0.060054 | 0.618787 | 0.60953 | Cdh3     |

|                   |              |        |           |          |          |          |             |
|-------------------|--------------|--------|-----------|----------|----------|----------|-------------|
| GO_BP_m4GO:190305 | regulation   | 1/727  | 2/23843   | 0.060054 | 0.618787 | 0.60953  | Zeb2        |
| GO_BP_m4GO:190329 | protein loc  | 1/727  | 2/23843   | 0.060054 | 0.618787 | 0.60953  | Arl5a       |
| GO_BP_m4GO:190341 | response to  | 1/727  | 2/23843   | 0.060054 | 0.618787 | 0.60953  | Abcb4       |
| GO_BP_m4GO:190341 | cellular res | 1/727  | 2/23843   | 0.060054 | 0.618787 | 0.60953  | Abcb4       |
| GO_BP_m4GO:190389 | negative re  | 1/727  | 2/23843   | 0.060054 | 0.618787 | 0.60953  | Atf6b       |
| GO_BP_m4GO:190459 | positive re  | 1/727  | 2/23843   | 0.060054 | 0.618787 | 0.60953  | Zfp3611     |
| GO_BP_m4GO:190489 | regulation   | 1/727  | 2/23843   | 0.060054 | 0.618787 | 0.60953  | Vstm5       |
| GO_BP_m4GO:190489 | positive re  | 1/727  | 2/23843   | 0.060054 | 0.618787 | 0.60953  | Vstm5       |
| GO_BP_m4GO:190504 | regulation   | 1/727  | 2/23843   | 0.060054 | 0.618787 | 0.60953  | Dusp10      |
| GO_BP_m4GO:190505 | regulation   | 1/727  | 2/23843   | 0.060054 | 0.618787 | 0.60953  | Rps3        |
| GO_BP_m4GO:190505 | positive re  | 1/727  | 2/23843   | 0.060054 | 0.618787 | 0.60953  | Rps3        |
| GO_BP_m4GO:190520 | negative re  | 1/727  | 2/23843   | 0.060054 | 0.618787 | 0.60953  | Ager        |
| GO_BP_m4GO:190522 | clathrin-co  | 1/727  | 2/23843   | 0.060054 | 0.618787 | 0.60953  | Gak         |
| GO_BP_m4GO:190555 | regulation   | 1/727  | 2/23843   | 0.060054 | 0.618787 | 0.60953  | Rtn4        |
| GO_BP_m4GO:190555 | positive re  | 1/727  | 2/23843   | 0.060054 | 0.618787 | 0.60953  | Rtn4        |
| GO_BP_m4GO:199026 | peptidyl-ty  | 1/727  | 2/23843   | 0.060054 | 0.618787 | 0.60953  | Dusp10      |
| GO_BP_m4GO:199039 | epithelium   | 1/727  | 2/23843   | 0.060054 | 0.618787 | 0.60953  | Dusp10      |
| GO_BP_m4GO:199096 | multi-orga   | 1/727  | 2/23843   | 0.060054 | 0.618787 | 0.60953  | Rab40b      |
| GO_BP_m4GO:200004 | regulation   | 1/727  | 2/23843   | 0.060054 | 0.618787 | 0.60953  | Sox17       |
| GO_BP_m4GO:200015 | regulation   | 1/727  | 2/23843   | 0.060054 | 0.618787 | 0.60953  | Bet1l       |
| GO_BP_m4GO:200022 | regulation   | 1/727  | 2/23843   | 0.060054 | 0.618787 | 0.60953  | Il13        |
| GO_BP_m4GO:200052 | negative re  | 1/727  | 2/23843   | 0.060054 | 0.618787 | 0.60953  | Lgals3      |
| GO_BP_m4GO:200087 | positive re  | 1/727  | 2/23843   | 0.060054 | 0.618787 | 0.60953  | Car2        |
| GO_BP_m4GO:200089 | positive re  | 1/727  | 2/23843   | 0.060054 | 0.618787 | 0.60953  | Car2        |
| GO_BP_m4GO:200104 | negative re  | 1/727  | 2/23843   | 0.060054 | 0.618787 | 0.60953  | Ctnna1      |
| GO_BP_m4GO:200114 | regulation   | 1/727  | 2/23843   | 0.060054 | 0.618787 | 0.60953  | Car2        |
| GO_BP_m4GO:200115 | positive re  | 1/727  | 2/23843   | 0.060054 | 0.618787 | 0.60953  | Car2        |
| GO_BP_m4GO:200119 | regulation   | 1/727  | 2/23843   | 0.060054 | 0.618787 | 0.60953  | Lgals3      |
| GO_BP_m4GO:200119 | negative re  | 1/727  | 2/23843   | 0.060054 | 0.618787 | 0.60953  | Lgals3      |
| GO_BP_m4GO:005140 | stress-activ | 12/727 | 237/23843 | 0.060325 | 0.620247 | 0.610968 | Ager/Dusp   |
| GO_BP_m4GO:200123 | regulation   | 9/727  | 162/23843 | 0.060601 | 0.620718 | 0.611432 | Bcl10/Ctnn  |
| GO_BP_m4GO:004225 | ribosome t   | 14/727 | 289/23843 | 0.060631 | 0.620718 | 0.611432 | Eri2/Mrm2,  |
| GO_BP_m4GO:000150 | action pote  | 8/727  | 138/23843 | 0.060952 | 0.622679 | 0.613363 | Cacna1b/C   |
| GO_BP_m4GO:004303 | tRNA amin    | 4/727  | 49/23843  | 0.061783 | 0.628477 | 0.619075 | Dalrd3/Ear: |
| GO_BP_m4GO:004569 | positive re  | 4/727  | 49/23843  | 0.061783 | 0.628477 | 0.619075 | Ager/Nkx6   |
| GO_BP_m4GO:190119 | positive re  | 3/727  | 30/23843  | 0.062342 | 0.631366 | 0.621921 | Esr2/Neurl: |
| GO_BP_m4GO:200010 | negative re  | 5/727  | 70/23843  | 0.06235  | 0.631366 | 0.621921 | Bcl10/Efna: |
| GO_BP_m4GO:000681 | sodium ion   | 11/727 | 213/23843 | 0.062669 | 0.631366 | 0.621921 | Atp1b4/Cn   |
| GO_BP_m4GO:000725 | JNK casc     | 10/727 | 188/23843 | 0.062959 | 0.631366 | 0.621921 | Ager/Dusp   |
| GO_BP_m4GO:000190 | cell killing | 8/727  | 139/23843 | 0.063038 | 0.631366 | 0.621921 | Ager/Dnas   |
| GO_BP_m4GO:000760 | visual perc  | 8/727  | 139/23843 | 0.063038 | 0.631366 | 0.621921 | Bfsp2/Cabp  |
| GO_BP_m4GO:007149 | cellular res | 6/727  | 93/23843  | 0.064882 | 0.631366 | 0.621921 | Agap3/Gna   |
| GO_BP_m4GO:190382 | organic aci  | 6/727  | 93/23843  | 0.064882 | 0.631366 | 0.621921 | Irs2/Slc16a |
| GO_BP_m4GO:190503 | carboxylic   | 6/727  | 93/23843  | 0.064882 | 0.631366 | 0.621921 | Irs2/Slc16a |
| GO_BP_m4GO:004303 | amino acid   | 4/727  | 50/23843  | 0.065609 | 0.631366 | 0.621921 | Dalrd3/Ear: |
| GO_BP_m4GO:005133 | regulation   | 4/727  | 50/23843  | 0.065609 | 0.631366 | 0.621921 | Cap2/Gngi   |
| GO_BP_m4GO:007022 | negative re  | 4/727  | 50/23843  | 0.065609 | 0.631366 | 0.621921 | Bcl10/Efna: |
| GO_BP_m4GO:000907 | aromatic ai  | 2/727  | 14/23843  | 0.066314 | 0.631366 | 0.621921 | Fah/Kynu    |

|                   |                      |           |          |          |          |             |
|-------------------|----------------------|-----------|----------|----------|----------|-------------|
| GO_BP_m4GO:000921 | purine deo 2/727     | 14/23843  | 0.066314 | 0.631366 | 0.621921 | Ak3/Dguok   |
| GO_BP_m4GO:001083 | negative re 2/727    | 14/23843  | 0.066314 | 0.631366 | 0.621921 | Slurp1/Vdr  |
| GO_BP_m4GO:003278 | negative re 2/727    | 14/23843  | 0.066314 | 0.631366 | 0.621921 | Nelfe/Recq  |
| GO_BP_m4GO:003637 | sodium ion 2/727     | 14/23843  | 0.066314 | 0.631366 | 0.621921 | Atp1b4/Slc  |
| GO_BP_m4GO:004345 | regulation 2/727     | 14/23843  | 0.066314 | 0.631366 | 0.621921 | Cdh3/Zeb2   |
| GO_BP_m4GO:004365 | dicarboxyli 2/727    | 14/23843  | 0.066314 | 0.631366 | 0.621921 | Acmsd/Kyr   |
| GO_BP_m4GO:004424 | lipid digest 2/727   | 14/23843  | 0.066314 | 0.631366 | 0.621921 | Apoa4/Npc   |
| GO_BP_m4GO:004561 | positive re 2/727    | 14/23843  | 0.066314 | 0.631366 | 0.621921 | Ovol2/Vdr   |
| GO_BP_m4GO:004572 | negative re 2/727    | 14/23843  | 0.066314 | 0.631366 | 0.621921 | C1qtnf12/S  |
| GO_BP_m4GO:004868 | negative re 2/727    | 14/23843  | 0.066314 | 0.631366 | 0.621921 | Rtn4/Rtn4r  |
| GO_BP_m4GO:005086 | positive re 2/727    | 14/23843  | 0.066314 | 0.631366 | 0.621921 | Rela/Rps3   |
| GO_BP_m4GO:009871 | sodium ion 2/727     | 14/23843  | 0.066314 | 0.631366 | 0.621921 | Slc8a1/Slc9 |
| GO_BP_m4GO:009885 | intestinal liq 2/727 | 14/23843  | 0.066314 | 0.631366 | 0.621921 | Apoa4/Npc   |
| GO_BP_m4GO:001715 | calcium ior 7/727    | 117/23843 | 0.067092 | 0.631366 | 0.621921 | Cacna1g/C   |
| GO_BP_m4GO:004328 | positive re 7/727    | 117/23843 | 0.067092 | 0.631366 | 0.621921 | Bcl10/Cycc  |
| GO_BP_m4GO:000697 | hyperosmc 3/727      | 31/23843  | 0.067519 | 0.631366 | 0.621921 | Mir29b-1/I  |
| GO_BP_m4GO:001580 | neutral am 3/727     | 31/23843  | 0.067519 | 0.631366 | 0.621921 | Slc1a4/Slc1 |
| GO_BP_m4GO:004561 | regulation 3/727     | 31/23843  | 0.067519 | 0.631366 | 0.621921 | Ovol2/Vdr   |
| GO_BP_m4GO:003355 | multicellulæ 6/727   | 94/23843  | 0.067612 | 0.631366 | 0.621921 | Cacna1b/E   |
| GO_BP_m4GO:007037 | positive re 12/727   | 242/23843 | 0.068258 | 0.631366 | 0.621921 | Ager/Erbb2  |
| GO_BP_m4GO:003030 | cholesterol 5/727    | 72/23843  | 0.068682 | 0.631366 | 0.621921 | Abcb4/Abc   |
| GO_BP_m4GO:004225 | ribosome a 5/727     | 72/23843  | 0.068682 | 0.631366 | 0.621921 | Gm5093/N    |
| GO_BP_m4GO:000636 | rRNA proc 10/727     | 192/23843 | 0.070352 | 0.631366 | 0.621921 | Eri2/Mrm2   |
| GO_BP_m4GO:000911 | nucleoside 6/727     | 95/23843  | 0.070407 | 0.631366 | 0.621921 | Ak3/Dguok   |
| GO_BP_m4GO:001567 | monovalen 20/727     | 459/23843 | 0.071217 | 0.631366 | 0.621921 | Ager/Atp11  |
| GO_BP_m4GO:005095 | sensory pe 8/727     | 143/23843 | 0.071821 | 0.631366 | 0.621921 | Bfsp2/Cabp  |
| GO_BP_m4GO:004632 | regulation 5/727     | 73/23843  | 0.071977 | 0.631366 | 0.621921 | C1qtnf12/F  |
| GO_BP_m4GO:000820 | cholesterol 7/727    | 119/23843 | 0.072056 | 0.631366 | 0.621921 | Akr1d1/Ap   |
| GO_BP_m4GO:000630 | DNA catab 3/727      | 32/23843  | 0.072884 | 0.631366 | 0.621921 | Dnase1/Dn   |
| GO_BP_m4GO:000698 | ER-nucleu 3/727      | 32/23843  | 0.072884 | 0.631366 | 0.621921 | Atf6b/Ddit  |
| GO_BP_m4GO:000926 | deoxyribor 3/727     | 32/23843  | 0.072884 | 0.631366 | 0.621921 | Ak3/Dguok   |
| GO_BP_m4GO:003509 | response tr 3/727    | 32/23843  | 0.072884 | 0.631366 | 0.621921 | Htr2c/Il13/ |
| GO_BP_m4GO:008609 | regulation 3/727     | 32/23843  | 0.072884 | 0.631366 | 0.621921 | Cacna1g/D   |
| GO_BP_m4GO:190247 | L-alpha-ar 3/727     | 32/23843  | 0.072884 | 0.631366 | 0.621921 | Slc17a8/Slc |
| GO_BP_m4GO:004340 | positive re 11/727   | 219/23843 | 0.07315  | 0.631366 | 0.621921 | Ager/Cspg   |
| GO_BP_m4GO:001612 | sterol biosy 4/727   | 52/23843  | 0.073621 | 0.631366 | 0.621921 | Apoa4/Cyp   |
| GO_BP_m4GO:001095 | positive re 8/727    | 144/23843 | 0.074127 | 0.631366 | 0.621921 | Bcl10/Cycc  |
| GO_BP_m4GO:000030 | response tr 10/727   | 194/23843 | 0.074247 | 0.631366 | 0.621921 | Agap3/Apc   |
| GO_BP_m4GO:005080 | regulation 10/727    | 194/23843 | 0.074247 | 0.631366 | 0.621921 | Anapc2/Ar   |
| GO_BP_m4GO:000915 | purine deo 2/727     | 15/23843  | 0.075014 | 0.631366 | 0.621921 | Ak3/Dguok   |
| GO_BP_m4GO:001045 | negative re 2/727    | 15/23843  | 0.075014 | 0.631366 | 0.621921 | Nkx6-2/So   |
| GO_BP_m4GO:001406 | negative re 2/727    | 15/23843  | 0.075014 | 0.631366 | 0.621921 | Btn2a2/Pik  |
| GO_BP_m4GO:001473 | regulation 2/727     | 15/23843  | 0.075014 | 0.631366 | 0.621921 | Gtf2ird1/N  |
| GO_BP_m4GO:003000 | cellular pot 2/727   | 15/23843  | 0.075014 | 0.631366 | 0.621921 | Atp1b4/Kci  |
| GO_BP_m4GO:004479 | positive re 2/727    | 15/23843  | 0.075014 | 0.631366 | 0.621921 | Ythdc2/Zfp  |
| GO_BP_m4GO:004565 | regulation 2/727     | 15/23843  | 0.075014 | 0.631366 | 0.621921 | Il34/Zfp36l |
| GO_BP_m4GO:006034 | heart trabe 2/727    | 15/23843  | 0.075014 | 0.631366 | 0.621921 | Fhl2/Ovol2  |
| GO_BP_m4GO:007072 | response tr 2/727    | 15/23843  | 0.075014 | 0.631366 | 0.621921 | Inhba/Mlc1  |

|                   |              |         |           |          |          |          |             |
|-------------------|--------------|---------|-----------|----------|----------|----------|-------------|
| GO_BP_m4GO:009956 | modification | 2/727   | 15/23843  | 0.075014 | 0.631366 | 0.621921 | Synpo/Tiar  |
| GO_BP_m4GO:190011 | positive re  | 2/727   | 15/23843  | 0.075014 | 0.631366 | 0.621921 | Bcl10/Rps3  |
| GO_BP_m4GO:001401 | positive re  | 5/727   | 74/23843  | 0.075357 | 0.631366 | 0.621921 | Ager/Nkx6   |
| GO_BP_m4GO:009873 | import ac    | 5/727   | 74/23843  | 0.075357 | 0.631366 | 0.621921 | Slc1a5/Slc1 |
| GO_BP_m4GO:005080 | positive re  | 15/727  | 326/23843 | 0.075784 | 0.631366 | 0.621921 | Ager/Arc/C  |
| GO_BP_m4GO:190165 | response t   | 16/727  | 353/23843 | 0.075806 | 0.631366 | 0.621921 | Ager/Car2/  |
| GO_BP_m4GO:001585 | organic hy   | 11/727  | 221/23843 | 0.076877 | 0.631366 | 0.621921 | Abcb4/Abc   |
| GO_BP_m4GO:001607 | rRNA meta    | 11/727  | 221/23843 | 0.076877 | 0.631366 | 0.621921 | Eri2/Ern2/M |
| GO_BP_m4GO:006027 | cilium asse  | 14/727  | 300/23843 | 0.077024 | 0.631366 | 0.621921 | Abcc4/Atxr  |
| GO_BP_m4GO:000175 | neural cres  | 4/727   | 53/23843  | 0.077805 | 0.631366 | 0.621921 | Folr1/Ovol  |
| GO_BP_m4GO:000689 | retrograde   | 3/727   | 33/23843  | 0.078433 | 0.631366 | 0.621921 | Arf3/Bet1/  |
| GO_BP_m4GO:005509 | acylglycero  | 3/727   | 33/23843  | 0.078433 | 0.631366 | 0.621921 | Apoa4/Apo   |
| GO_BP_m4GO:007032 | triglyceride | 3/727   | 33/23843  | 0.078433 | 0.631366 | 0.621921 | Apoa4/Apo   |
| GO_BP_m4GO:009031 | regulation   | 3/727   | 33/23843  | 0.078433 | 0.631366 | 0.621921 | Erbp2/Kcne  |
| GO_BP_m4GO:190109 | negative re  | 3/727   | 33/23843  | 0.078433 | 0.631366 | 0.621921 | Ctnna1/Ga   |
| GO_BP_m4GO:200124 | negative re  | 3/727   | 33/23843  | 0.078433 | 0.631366 | 0.621921 | Ctnna1/Ga   |
| GO_BP_m4GO:003464 | cellular res | 5/727   | 75/23843  | 0.078821 | 0.631366 | 0.621921 | Agap3/Mmr   |
| GO_BP_m4GO:001571 | monocarbo    | 8/727   | 146/23843 | 0.078873 | 0.631366 | 0.621921 | Abcb4/Abc   |
| GO_BP_m4GO:004561 | regulation   | 9/727   | 171/23843 | 0.079047 | 0.631366 | 0.621921 | Btn2a2/Du   |
| GO_BP_m4GO:007022 | lymphocyte   | 6/727   | 98/23843  | 0.079187 | 0.631366 | 0.621921 | Bcl10/Efna  |
| GO_BP_m4GO:004505 | regulated    | 10/727  | 197/23843 | 0.080336 | 0.631366 | 0.621921 | Cacna1g/C   |
| GO_BP_m4GO:001082 | positive re  | 4/727   | 54/23843  | 0.082104 | 0.631366 | 0.621921 | C1qtnf12/F  |
| GO_BP_m4GO:000691 | activation   | 5/727   | 76/23843  | 0.082369 | 0.631366 | 0.621921 | Bcl10/Cycs  |
| GO_BP_m4GO:190280 | regulation   | 7/727   | 123/23843 | 0.08262  | 0.631366 | 0.621921 | Anp32b/Bt   |
| GO_BP_m4GO:003424 | regulation   | 19/727  | 441/23843 | 0.08386  | 0.631366 | 0.621921 | Cnot6/Efna  |
| GO_BP_m4GO:000207 | epithelial   | 2/727   | 16/23843  | 0.084051 | 0.631366 | 0.621921 | Esr2/Kcne1  |
| GO_BP_m4GO:000240 | dendritic    | 2/727   | 16/23843  | 0.084051 | 0.631366 | 0.621921 | Gas6/Retn   |
| GO_BP_m4GO:000651 | glycoprote   | 2/727   | 16/23843  | 0.084051 | 0.631366 | 0.621921 | Manba/Stt   |
| GO_BP_m4GO:000683 | water trans  | 2/727   | 16/23843  | 0.084051 | 0.631366 | 0.621921 | Aqp9/Mip    |
| GO_BP_m4GO:001022 | response t   | 2/727   | 16/23843  | 0.084051 | 0.631366 | 0.621921 | Mme/Rela    |
| GO_BP_m4GO:001566 | gas transp   | 2/727   | 16/23843  | 0.084051 | 0.631366 | 0.621921 | Car2/Car4   |
| GO_BP_m4GO:001699 | cell wall    | 2/727   | 16/23843  | 0.084051 | 0.631366 | 0.621921 | Lyz1/Mant   |
| GO_BP_m4GO:003249 | response t   | 2/727   | 16/23843  | 0.084051 | 0.631366 | 0.621921 | Mapk14/Re   |
| GO_BP_m4GO:004476 | multi-orga   | 2/727   | 16/23843  | 0.084051 | 0.631366 | 0.621921 | Rab40b/Th   |
| GO_BP_m4GO:004683 | regulation   | 2/727   | 16/23843  | 0.084051 | 0.631366 | 0.621921 | Rbm26/Th    |
| GO_BP_m4GO:005185 | disruption   | 2/727   | 16/23843  | 0.084051 | 0.631366 | 0.621921 | Mbl1/Mbl2   |
| GO_BP_m4GO:005187 | killing by   | h 2/727 | 16/23843  | 0.084051 | 0.631366 | 0.621921 | Mbl1/Mbl2   |
| GO_BP_m4GO:007057 | negative re  | 2/727   | 16/23843  | 0.084051 | 0.631366 | 0.621921 | Rtn4/Rtn4r  |
| GO_BP_m4GO:009019 | regulation   | 2/727   | 16/23843  | 0.084051 | 0.631366 | 0.621921 | C3ar1/Ret   |
| GO_BP_m4GO:190257 | multi-orga   | 2/727   | 16/23843  | 0.084051 | 0.631366 | 0.621921 | Rab40b/Th   |
| GO_BP_m4GO:003273 | positive re  | 3/727   | 34/23843  | 0.08416  | 0.631366 | 0.621921 | Ager/Mapk   |
| GO_BP_m4GO:004326 | negative re  | 3/727   | 34/23843  | 0.08416  | 0.631366 | 0.621921 | Hcrt/Kcne1  |
| GO_BP_m4GO:002260 | digestive    | sy6/727 | 100/23843 | 0.085366 | 0.631366 | 0.621921 | Apoa4/Npo   |
| GO_BP_m4GO:190265 | secondary    | 7/727   | 124/23843 | 0.085393 | 0.631366 | 0.621921 | Akr1d1/Ap   |
| GO_BP_m4GO:001580 | L-amino ac   | 4/727   | 55/23843  | 0.086519 | 0.631366 | 0.621921 | Slc17a8/Slc |
| GO_BP_m4GO:003081 | regulation   | 4/727   | 55/23843  | 0.086519 | 0.631366 | 0.621921 | Cap2/Gng    |
| GO_BP_m4GO:004867 | response t   | 4/727   | 55/23843  | 0.086519 | 0.631366 | 0.621921 | Erbp2/Folr  |
| GO_BP_m4GO:000715 | homophilic   | 6/727   | 101/23843 | 0.088552 | 0.631366 | 0.621921 | Cadm2/Cd    |

|                                    |         |          |          |          |          |
|------------------------------------|---------|----------|----------|----------|----------|
| GO_BP_m4GO:000043regulation 1/727  | 3/23843 | 0.088716 | 0.631366 | 0.621921 | Usf2     |
| GO_BP_m4GO:000043positive reğ1/727 | 3/23843 | 0.088716 | 0.631366 | 0.621921 | Usf2     |
| GO_BP_m4GO:000071nucleotide 1/727  | 3/23843 | 0.088716 | 0.631366 | 0.621921 | Xpa      |
| GO_BP_m4GO:000156regulation 1/727  | 3/23843 | 0.088716 | 0.631366 | 0.621921 | Ppan     |
| GO_BP_m4GO:000182inner cell n1/727 | 3/23843 | 0.088716 | 0.631366 | 0.621921 | Sox17    |
| GO_BP_m4GO:000225kinin casca1/727  | 3/23843 | 0.088716 | 0.631366 | 0.621921 | F12      |
| GO_BP_m4GO:000235B-1a B cell 1/727 | 3/23843 | 0.088716 | 0.631366 | 0.621921 | Nfatc1   |
| GO_BP_m4GO:000287regulation 1/727  | 3/23843 | 0.088716 | 0.631366 | 0.621921 | Ffar3    |
| GO_BP_m4GO:000306regulation 1/727  | 3/23843 | 0.088716 | 0.631366 | 0.621921 | Ffar3    |
| GO_BP_m4GO:000601D-ribose n1/727   | 3/23843 | 0.088716 | 0.631366 | 0.621921 | Nudt5    |
| GO_BP_m4GO:0006015-phosphc1/727    | 3/23843 | 0.088716 | 0.631366 | 0.621921 | Prps2    |
| GO_BP_m4GO:000617ADP biosyr1/727   | 3/23843 | 0.088716 | 0.631366 | 0.621921 | Ak3      |
| GO_BP_m4GO:000705spindle ass1/727  | 3/23843 | 0.088716 | 0.631366 | 0.621921 | Aurka    |
| GO_BP_m4GO:00072Cphospholiç1/727   | 3/23843 | 0.088716 | 0.631366 | 0.621921 | Htr2c    |
| GO_BP_m4GO:00072Espermatog1/727    | 3/23843 | 0.088716 | 0.631366 | 0.621921 | Brip1    |
| GO_BP_m4GO:000862hormone-r1/727    | 3/23843 | 0.088716 | 0.631366 | 0.621921 | Esr2     |
| GO_BP_m4GO:001072regulation 1/727  | 3/23843 | 0.088716 | 0.631366 | 0.621921 | Gata1    |
| GO_BP_m4GO:001079regulation 1/727  | 3/23843 | 0.088716 | 0.631366 | 0.621921 | Rilp     |
| GO_BP_m4GO:00109Cregulation 1/727  | 3/23843 | 0.088716 | 0.631366 | 0.621921 | Pxylp1   |
| GO_BP_m4GO:00109Cpositive reğ1/727 | 3/23843 | 0.088716 | 0.631366 | 0.621921 | Pxylp1   |
| GO_BP_m4GO:001097regulation 1/727  | 3/23843 | 0.088716 | 0.631366 | 0.621921 | Vdr      |
| GO_BP_m4GO:00109Epositive reğ1/727 | 3/23843 | 0.088716 | 0.631366 | 0.621921 | Vdr      |
| GO_BP_m4GO:00140Epositive reğ1/727 | 3/23843 | 0.088716 | 0.631366 | 0.621921 | Htr2c    |
| GO_BP_m4GO:00140Epositive reğ1/727 | 3/23843 | 0.088716 | 0.631366 | 0.621921 | Lgals3   |
| GO_BP_m4GO:00190Efusion of vi1/727 | 3/23843 | 0.088716 | 0.631366 | 0.621921 | Gas6     |
| GO_BP_m4GO:00192Eisopenteny1/727   | 3/23843 | 0.088716 | 0.631366 | 0.621921 | Pmvk     |
| GO_BP_m4GO:001932pentose ca1/727   | 3/23843 | 0.088716 | 0.631366 | 0.621921 | Nudt5    |
| GO_BP_m4GO:001991peptidyl-ar1/727  | 3/23843 | 0.088716 | 0.631366 | 0.621921 | Prmt9    |
| GO_BP_m4GO:002177striatal mec1/727 | 3/23843 | 0.088716 | 0.631366 | 0.621921 | Inhba    |
| GO_BP_m4GO:002191regulation 1/727  | 3/23843 | 0.088716 | 0.631366 | 0.621921 | Nkx6-2   |
| GO_BP_m4GO:003021heparin bic1/727  | 3/23843 | 0.088716 | 0.631366 | 0.621921 | Xylt2    |
| GO_BP_m4GO:00324Eregulation 1/727  | 3/23843 | 0.088716 | 0.631366 | 0.621921 | Ralgps1  |
| GO_BP_m4GO:00336Enegative re1/727  | 3/23843 | 0.088716 | 0.631366 | 0.621921 | Serpinb9 |
| GO_BP_m4GO:00338Enegative re1/727  | 3/23843 | 0.088716 | 0.631366 | 0.621921 | Il13     |
| GO_BP_m4GO:003444plasma lipc1/727  | 3/23843 | 0.088716 | 0.631366 | 0.621921 | Apoa4    |
| GO_BP_m4GO:003567oligopeptic1/727  | 3/23843 | 0.088716 | 0.631366 | 0.621921 | Car2     |
| GO_BP_m4GO:00363Eamylase se1/727   | 3/23843 | 0.088716 | 0.631366 | 0.621921 | Vamp8    |
| GO_BP_m4GO:00396Emembrane 1/727    | 3/23843 | 0.088716 | 0.631366 | 0.621921 | Gas6     |
| GO_BP_m4GO:00429E3dipeptide t1/727 | 3/23843 | 0.088716 | 0.631366 | 0.621921 | Car2     |
| GO_BP_m4GO:00436Eco-translat1/727  | 3/23843 | 0.088716 | 0.631366 | 0.621921 | Stt3b    |
| GO_BP_m4GO:004477meiotic DN1/727   | 3/23843 | 0.088716 | 0.631366 | 0.621921 | Hus1     |
| GO_BP_m4GO:00448Cmulti-orga1/727   | 3/23843 | 0.088716 | 0.631366 | 0.621921 | Gas6     |
| GO_BP_m4GO:00461Cthymidine i1/727  | 3/23843 | 0.088716 | 0.631366 | 0.621921 | Tk1      |
| GO_BP_m4GO:004612purine deo1/727   | 3/23843 | 0.088716 | 0.631366 | 0.621921 | Dguok    |
| GO_BP_m4GO:00463E5-phosphc1/727    | 3/23843 | 0.088716 | 0.631366 | 0.621921 | Prps2    |
| GO_BP_m4GO:004694nucleoside 1/727  | 3/23843 | 0.088716 | 0.631366 | 0.621921 | Ak3      |
| GO_BP_m4GO:004881negative re1/727  | 3/23843 | 0.088716 | 0.631366 | 0.621921 | Cdh3     |
| GO_BP_m4GO:00488Ehypophysic1/727   | 3/23843 | 0.088716 | 0.631366 | 0.621921 | Duox2    |

|                                    |           |          |          |          |            |
|------------------------------------|-----------|----------|----------|----------|------------|
| GO_BP_m4GO:004886stem cell fa1/727 | 3/23843   | 0.088716 | 0.631366 | 0.621921 | Sox17      |
| GO_BP_m4GO:005101microtubul1/727   | 3/23843   | 0.088716 | 0.631366 | 0.621921 | Casc1      |
| GO_BP_m4GO:005204negative re1/727  | 3/23843   | 0.088716 | 0.631366 | 0.621921 | Serpinb9   |
| GO_BP_m4GO:005249negative re1/727  | 3/23843   | 0.088716 | 0.631366 | 0.621921 | Serpinb9   |
| GO_BP_m4GO:005501atrial cardi1/727 | 3/23843   | 0.088716 | 0.631366 | 0.621921 | Fhl2       |
| GO_BP_m4GO:005501atrial cardi1/727 | 3/23843   | 0.088716 | 0.631366 | 0.621921 | Fhl2       |
| GO_BP_m4GO:006091cardiac cell1/727 | 3/23843   | 0.088716 | 0.631366 | 0.621921 | Sox17      |
| GO_BP_m4GO:006101gall bladde1/727  | 3/23843   | 0.088716 | 0.631366 | 0.621921 | Sox17      |
| GO_BP_m4GO:006109regulation 1/727  | 3/23843   | 0.088716 | 0.631366 | 0.621921 | Abcb4      |
| GO_BP_m4GO:006109positive re1/727  | 3/23843   | 0.088716 | 0.631366 | 0.621921 | Abcb4      |
| GO_BP_m4GO:006114Peyer's pat1/727  | 3/23843   | 0.088716 | 0.631366 | 0.621921 | Ret        |
| GO_BP_m4GO:006135positive re1/727  | 3/23843   | 0.088716 | 0.631366 | 0.621921 | Ptpn23     |
| GO_BP_m4GO:006189positive re1/727  | 3/23843   | 0.088716 | 0.631366 | 0.621921 | Ager       |
| GO_BP_m4GO:007037cellular he1/727  | 3/23843   | 0.088716 | 0.631366 | 0.621921 | Hsbp1l1    |
| GO_BP_m4GO:007059dendrite se1/727  | 3/23843   | 0.088716 | 0.631366 | 0.621921 | Tnn        |
| GO_BP_m4GO:007067intralumen 1/727  | 3/23843   | 0.088716 | 0.631366 | 0.621921 | Rilp       |
| GO_BP_m4GO:00717Cimmunoglc1/727    | 3/23843   | 0.088716 | 0.631366 | 0.621921 | Polb       |
| GO_BP_m4GO:008014amino acid1/727   | 3/23843   | 0.088716 | 0.631366 | 0.621921 | Kctd7      |
| GO_BP_m4GO:009029negative re1/727  | 3/23843   | 0.088716 | 0.631366 | 0.621921 | Pid1       |
| GO_BP_m4GO:00988Emodificatic1/727  | 3/23843   | 0.088716 | 0.631366 | 0.621921 | Tiam1      |
| GO_BP_m4GO:010601regulation 1/727  | 3/23843   | 0.088716 | 0.631366 | 0.621921 | Ager       |
| GO_BP_m4GO:010601negative re1/727  | 3/23843   | 0.088716 | 0.631366 | 0.621921 | Ager       |
| GO_BP_m4GO:19004Enegative re1/727  | 3/23843   | 0.088716 | 0.631366 | 0.621921 | Ager       |
| GO_BP_m4GO:190334positive re1/727  | 3/23843   | 0.088716 | 0.631366 | 0.621921 | Nphp1      |
| GO_BP_m4GO:19036Eregulation 1/727  | 3/23843   | 0.088716 | 0.631366 | 0.621921 | Il13       |
| GO_BP_m4GO:19036Enegative re1/727  | 3/23843   | 0.088716 | 0.631366 | 0.621921 | Il13       |
| GO_BP_m4GO:190389regulation 1/727  | 3/23843   | 0.088716 | 0.631366 | 0.621921 | Atf6b      |
| GO_BP_m4GO:19045Eregulation 1/727  | 3/23843   | 0.088716 | 0.631366 | 0.621921 | Zfp36l1    |
| GO_BP_m4GO:19052Cregulation 1/727  | 3/23843   | 0.088716 | 0.631366 | 0.621921 | Ager       |
| GO_BP_m4GO:19058Einvadopod1/727    | 3/23843   | 0.088716 | 0.631366 | 0.621921 | Nav3       |
| GO_BP_m4GO:19901Eprotein K21/727   | 3/23843   | 0.088716 | 0.631366 | 0.621921 | Otud6a     |
| GO_BP_m4GO:19901Eprotein K31/727   | 3/23843   | 0.088716 | 0.631366 | 0.621921 | Otud6a     |
| GO_BP_m4GO:199044intrinsic ap1/727 | 3/23843   | 0.088716 | 0.631366 | 0.621921 | Ddit3      |
| GO_BP_m4GO:199052bone reger1/727   | 3/23843   | 0.088716 | 0.631366 | 0.621921 | Lgr6       |
| GO_BP_m4GO:199091double-str1/727   | 3/23843   | 0.088716 | 0.631366 | 0.621921 | Brip1      |
| GO_BP_m4GO:200001negative re1/727  | 3/23843   | 0.088716 | 0.631366 | 0.621921 | Ddit3      |
| GO_BP_m4GO:200032regulation 1/727  | 3/23843   | 0.088716 | 0.631366 | 0.621921 | Cnot6      |
| GO_BP_m4GO:200032positive re1/727  | 3/23843   | 0.088716 | 0.631366 | 0.621921 | Cnot6      |
| GO_BP_m4GO:20003Enegative re1/727  | 3/23843   | 0.088716 | 0.631366 | 0.621921 | Astl       |
| GO_BP_m4GO:20012Cpositive re1/727  | 3/23843   | 0.088716 | 0.631366 | 0.621921 | Ager       |
| GO_BP_m4GO:007022regulation 5/727  | 78/23843  | 0.089715 | 0.631366 | 0.621921 | Bcl10/Efna |
| GO_BP_m4GO:00067Eone-carbo3/727    | 35/23843  | 0.09006  | 0.631366 | 0.621921 | Car2/Car4/ |
| GO_BP_m4GO:00456Epositive re3/727  | 35/23843  | 0.09006  | 0.631366 | 0.621921 | Fst/Ovol2/ |
| GO_BP_m4GO:004647phosphatic3/727   | 35/23843  | 0.09006  | 0.631366 | 0.621921 | Apoa4/Gd   |
| GO_BP_m4GO:004301camera-ty15/727   | 335/23843 | 0.09029  | 0.631366 | 0.621921 | Bfsp2/Cab  |
| GO_BP_m4GO:00311Cneuron prc4/727   | 56/23843  | 0.091046 | 0.631366 | 0.621921 | Apoa4/Folr |
| GO_BP_m4GO:00613Ecardiac cor4/727  | 56/23843  | 0.091046 | 0.631366 | 0.621921 | Cacna1g/D  |
| GO_BP_m4GO:00000EG1/S transi9/727  | 177/23843 | 0.093051 | 0.631366 | 0.621921 | Anp32b/Bt  |

|                                     |           |          |          |          |             |
|-------------------------------------|-----------|----------|----------|----------|-------------|
| GO_BP_m4GO:199013neuron prc9/727    | 177/23843 | 0.093051 | 0.631366 | 0.621921 | Anapc2/Au   |
| GO_BP_m4GO:000914pyrimidine 2/727   | 17/23843  | 0.093397 | 0.631366 | 0.621921 | Ak3/Nme5    |
| GO_BP_m4GO:000921pyrimidine 2/727   | 17/23843  | 0.093397 | 0.631366 | 0.621921 | Ak3/Nme5    |
| GO_BP_m4GO:00324Cmelanoson2/727     | 17/23843  | 0.093397 | 0.631366 | 0.621921 | Cdh3/Mreç   |
| GO_BP_m4GO:004274hydrogen ç2/727    | 17/23843  | 0.093397 | 0.631366 | 0.621921 | Apoa4/Mp    |
| GO_BP_m4GO:004403cell wall mç2/727  | 17/23843  | 0.093397 | 0.631366 | 0.621921 | Lyz11/Mant  |
| GO_BP_m4GO:004885forebrain n2/727   | 17/23843  | 0.093397 | 0.631366 | 0.621921 | Duox2/Gak   |
| GO_BP_m4GO:005065chondroitir2/727   | 17/23843  | 0.093397 | 0.631366 | 0.621921 | Pxylp1/Xylt |
| GO_BP_m4GO:006085regulation 2/727   | 17/23843  | 0.093397 | 0.631366 | 0.621921 | Nkx6-2/So   |
| GO_BP_m4GO:007155cell wall orç2/727 | 17/23843  | 0.093397 | 0.631366 | 0.621921 | Lyz11/Mant  |
| GO_BP_m4GO:19032Cpositive reç2/727  | 17/23843  | 0.093397 | 0.631366 | 0.621921 | Ripk1/Sfpq  |
| GO_BP_m4GO:190531semi-lunar 2/727   | 17/23843  | 0.093397 | 0.631366 | 0.621921 | Efna1/Nfat  |
| GO_BP_m4GO:200081regulation 2/727   | 17/23843  | 0.093397 | 0.631366 | 0.621921 | Nedd41/Nç   |
| GO_BP_m4GO:003803signal tranç5/727  | 79/23843  | 0.093511 | 0.631366 | 0.621921 | Ctnna1/Ga   |
| GO_BP_m4GO:009713extrinsic aç5/727  | 79/23843  | 0.093511 | 0.631366 | 0.621921 | Ctnna1/Ga   |
| GO_BP_m4GO:003241positive reç6/727  | 103/23843 | 0.095118 | 0.631366 | 0.621921 | Ager/Arc/C  |
| GO_BP_m4GO:00456Cpositive reç4/727  | 57/23843  | 0.095684 | 0.631366 | 0.621921 | Htr2c/Map   |
| GO_BP_m4GO:004876mesenchyr10/727    | 204/23843 | 0.095708 | 0.631366 | 0.621921 | Ager/Efna1  |
| GO_BP_m4GO:000725activation ç3/727  | 36/23843  | 0.096128 | 0.631366 | 0.621921 | Ern2/Map3   |
| GO_BP_m4GO:004826response tr3/727   | 36/23843  | 0.096128 | 0.631366 | 0.621921 | Cacna1b/R   |
| GO_BP_m4GO:006138heart trabe3/727   | 36/23843  | 0.096128 | 0.631366 | 0.621921 | Fhl2/Nfatç  |
| GO_BP_m4GO:001715regulation 5/727   | 80/23843  | 0.097389 | 0.631366 | 0.621921 | Cacna1g/C   |
| GO_BP_m4GO:004586positive reç14/727 | 312/23843 | 0.097911 | 0.631366 | 0.621921 | Ast1/Aurka/ |
| GO_BP_m4GO:000183epithelial tr7/727 | 129/23843 | 0.100043 | 0.631366 | 0.621921 | Ager/Efna1  |
| GO_BP_m4GO:200105positive reç7/727  | 129/23843 | 0.100043 | 0.631366 | 0.621921 | Bcl10/Cycc  |
| GO_BP_m4GO:004327positive reç13/727 | 286/23843 | 0.100188 | 0.631366 | 0.621921 | Abcb4/Age   |
| GO_BP_m4GO:19033Cpositive reç4/727  | 58/23843  | 0.100431 | 0.631366 | 0.621921 | Cacna1g/C   |
| GO_BP_m4GO:003466ncRNA meç19/727    | 453/23843 | 0.101735 | 0.631366 | 0.621921 | Dalrd3/Dus  |
| GO_BP_m4GO:00030Cheart morç12/727   | 260/23843 | 0.102245 | 0.631366 | 0.621921 | Dsp/Efna1/  |
| GO_BP_m4GO:00017Cendoderm 3/727     | 37/23843  | 0.102357 | 0.631366 | 0.621921 | Dusp2/Inh1  |
| GO_BP_m4GO:00460Cregulation 3/727   | 37/23843  | 0.102357 | 0.631366 | 0.621921 | Ager/Btn2a  |
| GO_BP_m4GO:006109positive reç3/727  | 37/23843  | 0.102357 | 0.631366 | 0.621921 | Efna1/Gas6  |
| GO_BP_m4GO:008606cell commç3/727    | 37/23843  | 0.102357 | 0.631366 | 0.621921 | Cacna1g/D   |
| GO_BP_m4GO:004816regulation 15/727  | 342/23843 | 0.102709 | 0.631366 | 0.621921 | Ager/Anap   |
| GO_BP_m4GO:000725JAK-STAT ç10/727   | 207/23843 | 0.102793 | 0.631366 | 0.621921 | Ager/Flrt1/ |
| GO_BP_m4GO:000195positive reç2/727  | 18/23843  | 0.103026 | 0.631366 | 0.621921 | Cacna1b/H   |
| GO_BP_m4GO:001075positive reç2/727  | 18/23843  | 0.103026 | 0.631366 | 0.621921 | C3ar1/Map   |
| GO_BP_m4GO:002203corpus callç2/727  | 18/23843  | 0.103026 | 0.631366 | 0.621921 | Rtn4r/Zeb2  |
| GO_BP_m4GO:00324Cestablishmç2/727   | 18/23843  | 0.103026 | 0.631366 | 0.621921 | Cdh3/Mreç   |
| GO_BP_m4GO:003357response tr2/727   | 18/23843  | 0.103026 | 0.631366 | 0.621921 | Cacna1b/E   |
| GO_BP_m4GO:003623interstrand 2/727  | 18/23843  | 0.103026 | 0.631366 | 0.621921 | Cenps/Xpa   |
| GO_BP_m4GO:003631response tr2/727   | 18/23843  | 0.103026 | 0.631366 | 0.621921 | Inhba/Mlc1  |
| GO_BP_m4GO:004243melanin bic2/727   | 18/23843  | 0.103026 | 0.631366 | 0.621921 | Cdh3/Zeb2   |
| GO_BP_m4GO:004647glycerophç2/727    | 18/23843  | 0.103026 | 0.631366 | 0.621921 | Gdpd3/Lipi  |
| GO_BP_m4GO:005086negative re2/727   | 18/23843  | 0.103026 | 0.631366 | 0.621921 | Btn2a2/Lgç  |
| GO_BP_m4GO:00519Cpigment gr2/727    | 18/23843  | 0.103026 | 0.631366 | 0.621921 | Cdh3/Mreç   |
| GO_BP_m4GO:00716Cmonocyte ç2/727    | 18/23843  | 0.103026 | 0.631366 | 0.621921 | Ager/Socs5  |
| GO_BP_m4GO:007163regulation 2/727   | 18/23843  | 0.103026 | 0.631366 | 0.621921 | Ager/Socs5  |

|                                     |           |          |          |          |             |
|-------------------------------------|-----------|----------|----------|----------|-------------|
| GO_BP_m4GO:190101negative re2/727   | 18/23843  | 0.103026 | 0.631366 | 0.621921 | Kcne1/Ned   |
| GO_BP_m4GO:19043εcellular res 2/727 | 18/23843  | 0.103026 | 0.631366 | 0.621921 | Car2/Rela   |
| GO_BP_m4GO:199077response tr2/727   | 18/23843  | 0.103026 | 0.631366 | 0.621921 | Car2/Rela   |
| GO_BP_m4GO:001612sterol metε7/727   | 130/23843 | 0.103128 | 0.631366 | 0.621921 | Akr1d1/Ap   |
| GO_BP_m4GO:19033Cregulation 7/727   | 130/23843 | 0.103128 | 0.631366 | 0.621921 | Cacna1g/C   |
| GO_BP_m4GO:00072εRas proteir18/727  | 426/23843 | 0.103561 | 0.631366 | 0.621921 | Agap3/Agf   |
| GO_BP_m4GO:200011regulation 11/727  | 234/23843 | 0.103974 | 0.631366 | 0.621921 | Anp32b/Bc   |
| GO_BP_m4GO:004232negative re19/727  | 455/23843 | 0.104931 | 0.631366 | 0.621921 | Ager/Akt1s  |
| GO_BP_m4GO:001814peptide crc4/727   | 59/23843  | 0.105284 | 0.631366 | 0.621921 | Dsp/Lce1g.  |
| GO_BP_m4GO:00970Cregulation 4/727   | 59/23843  | 0.105284 | 0.631366 | 0.621921 | Apoa4/Lipc  |
| GO_BP_m4GO:00512Crelease of ε6/727  | 106/23843 | 0.105439 | 0.631366 | 0.621921 | Ddit3/Htr2. |
| GO_BP_m4GO:00512εnegative re6/727   | 106/23843 | 0.105439 | 0.631366 | 0.621921 | Ddit3/Htr2. |
| GO_BP_m4GO:00508Cregulation 9/727   | 182/23843 | 0.10576  | 0.631366 | 0.621921 | Anapc2/Ar   |
| GO_BP_m4GO:00328εresponse tr10/727  | 209/23843 | 0.107682 | 0.631366 | 0.621921 | C1qtnf12/F  |
| GO_BP_m4GO:003287regulation 10/727  | 209/23843 | 0.107682 | 0.631366 | 0.621921 | Ager/Dusp   |
| GO_BP_m4GO:00976εSTAT casca10/727   | 209/23843 | 0.107682 | 0.631366 | 0.621921 | Ager/Flrt1/ |
| GO_BP_m4GO:00434Cregulation 13/727  | 290/23843 | 0.108353 | 0.631366 | 0.621921 | Ager/Cspg.  |
| GO_BP_m4GO:200102positive reç3/727  | 38/23843  | 0.108741 | 0.631366 | 0.621921 | Htr2c/Ripk. |
| GO_BP_m4GO:000641regulation 17/727  | 401/23843 | 0.108793 | 0.631366 | 0.621921 | Cnot6/Eif3ε |
| GO_BP_m4GO:00082εinsulin rece6/727  | 107/23843 | 0.109003 | 0.631366 | 0.621921 | C1qtnf12/C  |
| GO_BP_m4GO:004881regulation 6/727   | 107/23843 | 0.109003 | 0.631366 | 0.621921 | Anapc2/Ar   |
| GO_BP_m4GO:005102mRNA tran6/727     | 107/23843 | 0.109003 | 0.631366 | 0.621921 | Parp11/Sec  |
| GO_BP_m4GO:00512εregulation 6/727   | 107/23843 | 0.109003 | 0.631366 | 0.621921 | Ddit3/Htr2. |
| GO_BP_m4GO:00515εregulation 6/727   | 107/23843 | 0.109003 | 0.631366 | 0.621921 | Cacna1b/H   |
| GO_BP_m4GO:190382negative re6/727   | 107/23843 | 0.109003 | 0.631366 | 0.621921 | Astn2/Dclk  |
| GO_BP_m4GO:00718εleukocyte ε7/727   | 132/23843 | 0.109451 | 0.631366 | 0.621921 | Bcl10/Efna. |
| GO_BP_m4GO:00426εcholesterol5/727   | 83/23843  | 0.109496 | 0.631366 | 0.621921 | Apoa4/Cyp   |
| GO_BP_m4GO:00550εsterol hom5/727    | 83/23843  | 0.109496 | 0.631366 | 0.621921 | Apoa4/Cyp   |
| GO_BP_m4GO:19030εnegative re5/727   | 83/23843  | 0.109496 | 0.631366 | 0.621921 | Ager/Dusp   |
| GO_BP_m4GO:00703Cregulation 10/727  | 210/23843 | 0.110175 | 0.631366 | 0.621921 | Ager/Dusp   |
| GO_BP_m4GO:00075εlactation 4/727    | 60/23843  | 0.110242 | 0.631366 | 0.621921 | Neurl1a/Oi  |
| GO_BP_m4GO:007147cellular res 4/727 | 60/23843  | 0.110242 | 0.631366 | 0.621921 | Grb2/Hus1   |
| GO_BP_m4GO:00512Csequesterir6/727   | 108/23843 | 0.112629 | 0.631366 | 0.621921 | Ddit3/Htr2. |
| GO_BP_m4GO:00510εnegative re7/727   | 133/23843 | 0.112688 | 0.631366 | 0.621921 | Hcrt/Hus1/  |
| GO_BP_m4GO:00021εcytoplasmic2/727   | 19/23843  | 0.112911 | 0.631366 | 0.621921 | Eif3a/Rps2  |
| GO_BP_m4GO:00066εbile acid bi2/727  | 19/23843  | 0.112911 | 0.631366 | 0.621921 | Akr1d1/Cyl  |
| GO_BP_m4GO:00107εpositive reç2/727  | 19/23843  | 0.112911 | 0.631366 | 0.621921 | Ager/Slc8a  |
| GO_BP_m4GO:001581L-glutamα2/727     | 19/23843  | 0.112911 | 0.631366 | 0.621921 | Slc17a8/Slc |
| GO_BP_m4GO:00427εmRNA tran2/727     | 19/23843  | 0.112911 | 0.631366 | 0.621921 | Ddit3/Sox1  |
| GO_BP_m4GO:00519Cestablishmα2/727   | 19/23843  | 0.112911 | 0.631366 | 0.621921 | Cdh3/Mreç   |
| GO_BP_m4GO:19004Cpositive reç2/727  | 19/23843  | 0.112911 | 0.631366 | 0.621921 | Ripk1/Sfpq  |
| GO_BP_m4GO:190552positive reç2/727  | 19/23843  | 0.112911 | 0.631366 | 0.621921 | C3ar1/Maç   |
| GO_BP_m4GO:20007εnegative re2/727   | 19/23843  | 0.112911 | 0.631366 | 0.621921 | Recql5/Trip |
| GO_BP_m4GO:000864carbohydrε8/727    | 159/23843 | 0.114003 | 0.631366 | 0.621921 | C1qtnf12/F  |
| GO_BP_m4GO:003164killing of cε3/727 | 39/23843  | 0.115276 | 0.631366 | 0.621921 | Mbl1/Mbl2   |
| GO_BP_m4GO:00443εdisruption α3/727  | 39/23843  | 0.115276 | 0.631366 | 0.621921 | Mbl1/Mbl2   |
| GO_BP_m4GO:004502early endoα3/727   | 39/23843  | 0.115276 | 0.631366 | 0.621921 | Kif16b/Ptpα |
| GO_BP_m4GO:004824macrophαç3/727     | 39/23843  | 0.115276 | 0.631366 | 0.621921 | C3ar1/Lgal  |



|                                    |           |          |          |          |             |
|------------------------------------|-----------|----------|----------|----------|-------------|
| GO_BP_m4GO:200102negative re4/727  | 61/23843  | 0.115303 | 0.631366 | 0.621921 | Recql5/Rps  |
| GO_BP_m4GO:200124positive re4/727  | 61/23843  | 0.115303 | 0.631366 | 0.621921 | Lck/Plagl2/ |
| GO_BP_m4GO:000941response to7/727  | 134/23843 | 0.115975 | 0.631366 | 0.621921 | Agap3/Hus   |
| GO_BP_m4GO:20001Cregulation 6/727  | 109/23843 | 0.116315 | 0.631366 | 0.621921 | Bcl10/Efna: |
| GO_BP_m4GO:000042carbon cat:1/727  | 4/23843   | 0.116506 | 0.631366 | 0.621921 | Usf2        |
| GO_BP_m4GO:000043carbon cat:1/727  | 4/23843   | 0.116506 | 0.631366 | 0.621921 | Usf2        |
| GO_BP_m4GO:00007Cmeiotic DN1/727   | 4/23843   | 0.116506 | 0.631366 | 0.621921 | Brip1       |
| GO_BP_m4GO:000073DNA catab1/727    | 4/23843   | 0.116506 | 0.631366 | 0.621921 | Eri2        |
| GO_BP_m4GO:000191negative re1/727  | 4/23843   | 0.116506 | 0.631366 | 0.621921 | Muc4        |
| GO_BP_m4GO:000192B-1 B cell c1/727 | 4/23843   | 0.116506 | 0.631366 | 0.621921 | Nfatc1      |
| GO_BP_m4GO:000195intestinal D1/727 | 4/23843   | 0.116506 | 0.631366 | 0.621921 | Slc5a1      |
| GO_BP_m4GO:000218translation 1/727 | 4/23843   | 0.116506 | 0.631366 | 0.621921 | Eif3a       |
| GO_BP_m4GO:00024Cmyeloid de1/727   | 4/23843   | 0.116506 | 0.631366 | 0.621921 | Retnlg      |
| GO_BP_m4GO:000242T cell medi1/727  | 4/23843   | 0.116506 | 0.631366 | 0.621921 | Muc4        |
| GO_BP_m4GO:000246tolerance ir1/727 | 4/23843   | 0.116506 | 0.631366 | 0.621921 | C3ar1       |
| GO_BP_m4GO:000252acute inflar1/727 | 4/23843   | 0.116506 | 0.631366 | 0.621921 | Ffar3       |
| GO_BP_m4GO:000283negative re1/727  | 4/23843   | 0.116506 | 0.631366 | 0.621921 | Muc4        |
| GO_BP_m4GO:000283negative re1/727  | 4/23843   | 0.116506 | 0.631366 | 0.621921 | Muc4        |
| GO_BP_m4GO:000284regulation 1/727  | 4/23843   | 0.116506 | 0.631366 | 0.621921 | Muc4        |
| GO_BP_m4GO:00031Cpositive re1/727  | 4/23843   | 0.116506 | 0.631366 | 0.621921 | Gas6        |
| GO_BP_m4GO:000642arginyl-tRN1/727  | 4/23843   | 0.116506 | 0.631366 | 0.621921 | Dalrd3      |
| GO_BP_m4GO:000722Wnt signali1/727  | 4/23843   | 0.116506 | 0.631366 | 0.621921 | Ror2        |
| GO_BP_m4GO:000913purine nuc1/727   | 4/23843   | 0.116506 | 0.631366 | 0.621921 | Ak3         |
| GO_BP_m4GO:000918purine ribo1/727  | 4/23843   | 0.116506 | 0.631366 | 0.621921 | Ak3         |
| GO_BP_m4GO:001028heat acclim1/727  | 4/23843   | 0.116506 | 0.631366 | 0.621921 | Hsbp1l1     |
| GO_BP_m4GO:001072regulation 1/727  | 4/23843   | 0.116506 | 0.631366 | 0.621921 | Gata1       |
| GO_BP_m4GO:001074negative re1/727  | 4/23843   | 0.116506 | 0.631366 | 0.621921 | Irs2        |
| GO_BP_m4GO:001483myoblast d1/727   | 4/23843   | 0.116506 | 0.631366 | 0.621921 | Mapk14      |
| GO_BP_m4GO:001563cadmium ic1/727   | 4/23843   | 0.116506 | 0.631366 | 0.621921 | Slc39a8     |
| GO_BP_m4GO:002191regulation 1/727  | 4/23843   | 0.116506 | 0.631366 | 0.621921 | Nkx6-2      |
| GO_BP_m4GO:00302Cheparin m1/727    | 4/23843   | 0.116506 | 0.631366 | 0.621921 | Xylt2       |
| GO_BP_m4GO:003024skeletal mu1/727  | 4/23843   | 0.116506 | 0.631366 | 0.621921 | Myom2       |
| GO_BP_m4GO:003053embryonic 1/727   | 4/23843   | 0.116506 | 0.631366 | 0.621921 | Ror2        |
| GO_BP_m4GO:003207positive re1/727  | 4/23843   | 0.116506 | 0.631366 | 0.621921 | Rps3        |
| GO_BP_m4GO:003284positive re1/727  | 4/23843   | 0.116506 | 0.631366 | 0.621921 | Car2        |
| GO_BP_m4GO:003315negative re1/727  | 4/23843   | 0.116506 | 0.631366 | 0.621921 | Gas6        |
| GO_BP_m4GO:003552protein K21/727   | 4/23843   | 0.116506 | 0.631366 | 0.621921 | Otud6a      |
| GO_BP_m4GO:003562intrahepati1/727  | 4/23843   | 0.116506 | 0.631366 | 0.621921 | Gak         |
| GO_BP_m4GO:003573ureter mati1/727  | 4/23843   | 0.116506 | 0.631366 | 0.621921 | Ret         |
| GO_BP_m4GO:003613Schwann c1/727    | 4/23843   | 0.116506 | 0.631366 | 0.621921 | Tiam1       |
| GO_BP_m4GO:00365C ATF6-medi1/727   | 4/23843   | 0.116506 | 0.631366 | 0.621921 | Atf6b       |
| GO_BP_m4GO:004266negative re1/727  | 4/23843   | 0.116506 | 0.631366 | 0.621921 | Sox17       |
| GO_BP_m4GO:004333corticotrop1/727  | 4/23843   | 0.116506 | 0.631366 | 0.621921 | Htr2c       |
| GO_BP_m4GO:004333regulation 1/727  | 4/23843   | 0.116506 | 0.631366 | 0.621921 | Htr2c       |
| GO_BP_m4GO:004355negative re1/727  | 4/23843   | 0.116506 | 0.631366 | 0.621921 | Pik3ip1     |
| GO_BP_m4GO:004433canonical V1/727  | 4/23843   | 0.116506 | 0.631366 | 0.621921 | Tnn         |
| GO_BP_m4GO:00448C multi-orga1/727  | 4/23843   | 0.116506 | 0.631366 | 0.621921 | Gas6        |
| GO_BP_m4GO:004591negative re1/727  | 4/23843   | 0.116506 | 0.631366 | 0.621921 | Htr2c       |

|                                      |         |          |          |          |         |
|--------------------------------------|---------|----------|----------|----------|---------|
| GO_BP_m4GO:004596negative re1/727    | 4/23843 | 0.116506 | 0.631366 | 0.621921 | Htr2c   |
| GO_BP_m4GO:004601positive re1/727    | 4/23843 | 0.116506 | 0.631366 | 0.621921 | Usf2    |
| GO_BP_m4GO:004612pyrimidine 1/727    | 4/23843 | 0.116506 | 0.631366 | 0.621921 | Tk1     |
| GO_BP_m4GO:004644creatinine r1/727   | 4/23843 | 0.116506 | 0.631366 | 0.621921 | Mme     |
| GO_BP_m4GO:004681receptor-n1/727     | 4/23843 | 0.116506 | 0.631366 | 0.621921 | Gas6    |
| GO_BP_m4GO:00481Cestablishm1/727     | 4/23843 | 0.116506 | 0.631366 | 0.621921 | Astn2   |
| GO_BP_m4GO:00481Cestablishm1/727     | 4/23843 | 0.116506 | 0.631366 | 0.621921 | Astn2   |
| GO_BP_m4GO:00483E mesendod1/727      | 4/23843 | 0.116506 | 0.631366 | 0.621921 | Zfp3611 |
| GO_BP_m4GO:00486E positive re1/727   | 4/23843 | 0.116506 | 0.631366 | 0.621921 | Rtn4    |
| GO_BP_m4GO:00515C response tr1/727   | 4/23843 | 0.116506 | 0.631366 | 0.621921 | Folr1   |
| GO_BP_m4GO:00517C regulation 1/727   | 4/23843 | 0.116506 | 0.631366 | 0.621921 | Cdh3    |
| GO_BP_m4GO:005191positive re1/727    | 4/23843 | 0.116506 | 0.631366 | 0.621921 | F12     |
| GO_BP_m4GO:006026negative re1/727    | 4/23843 | 0.116506 | 0.631366 | 0.621921 | Dusp10  |
| GO_BP_m4GO:006027positive re1/727    | 4/23843 | 0.116506 | 0.631366 | 0.621921 | Inhba   |
| GO_BP_m4GO:00602E positive re1/727   | 4/23843 | 0.116506 | 0.631366 | 0.621921 | Aurka   |
| GO_BP_m4GO:00604C prevention 1/727   | 4/23843 | 0.116506 | 0.631366 | 0.621921 | Astl    |
| GO_BP_m4GO:006074epithelial c1/727   | 4/23843 | 0.116506 | 0.631366 | 0.621921 | Esr2    |
| GO_BP_m4GO:006091cardiac cell1/727   | 4/23843 | 0.116506 | 0.631366 | 0.621921 | Sox17   |
| GO_BP_m4GO:00610E endoderm1/727      | 4/23843 | 0.116506 | 0.631366 | 0.621921 | Sox17   |
| GO_BP_m4GO:00613E Wnt protei 1/727   | 4/23843 | 0.116506 | 0.631366 | 0.621921 | Ptpn23  |
| GO_BP_m4GO:00613E regulation 1/727   | 4/23843 | 0.116506 | 0.631366 | 0.621921 | Ptpn23  |
| GO_BP_m4GO:00618E regulation 1/727   | 4/23843 | 0.116506 | 0.631366 | 0.621921 | Ager    |
| GO_BP_m4GO:007034positive re1/727    | 4/23843 | 0.116506 | 0.631366 | 0.621921 | Pid1    |
| GO_BP_m4GO:00705E histone H2 1/727   | 4/23843 | 0.116506 | 0.631366 | 0.621921 | Trip12  |
| GO_BP_m4GO:007057cadmium ic1/727     | 4/23843 | 0.116506 | 0.631366 | 0.621921 | Slc39a8 |
| GO_BP_m4GO:00708E dehydroas1/727     | 4/23843 | 0.116506 | 0.631366 | 0.621921 | Slc2a2  |
| GO_BP_m4GO:00709C nuclear-tra1/727   | 4/23843 | 0.116506 | 0.631366 | 0.621921 | Cnot6   |
| GO_BP_m4GO:00717E transcriptic1/727  | 4/23843 | 0.116506 | 0.631366 | 0.621921 | Gata1   |
| GO_BP_m4GO:00717E endoplasm1/727     | 4/23843 | 0.116506 | 0.631366 | 0.621921 | Rtn4    |
| GO_BP_m4GO:00718C protein loc1/727   | 4/23843 | 0.116506 | 0.631366 | 0.621921 | Dsp     |
| GO_BP_m4GO:008604membrane 1/727      | 4/23843 | 0.116506 | 0.631366 | 0.621921 | Cacna1g |
| GO_BP_m4GO:00901E positive re1/727   | 4/23843 | 0.116506 | 0.631366 | 0.621921 | Vamp8   |
| GO_BP_m4GO:00902C gene loopi 1/727   | 4/23843 | 0.116506 | 0.631366 | 0.621921 | Gata1   |
| GO_BP_m4GO:00902C regulation 1/727   | 4/23843 | 0.116506 | 0.631366 | 0.621921 | Pid1    |
| GO_BP_m4GO:009057dsDNA loo 1/727     | 4/23843 | 0.116506 | 0.631366 | 0.621921 | Gata1   |
| GO_BP_m4GO:00972E oligodendr1/727    | 4/23843 | 0.116506 | 0.631366 | 0.621921 | Gas6    |
| GO_BP_m4GO:009727 compleme1/727      | 4/23843 | 0.116506 | 0.631366 | 0.621921 | Il13    |
| GO_BP_m4GO:00989E NMDA sele1/727     | 4/23843 | 0.116506 | 0.631366 | 0.621921 | Tiam1   |
| GO_BP_m4GO:01060C intestinal h 1/727 | 4/23843 | 0.116506 | 0.631366 | 0.621921 | Slc5a1  |
| GO_BP_m4GO:190004negative re1/727    | 4/23843 | 0.116506 | 0.631366 | 0.621921 | Trip12  |
| GO_BP_m4GO:190014regulation 1/727    | 4/23843 | 0.116506 | 0.631366 | 0.621921 | Tiam1   |
| GO_BP_m4GO:190184negative re1/727    | 4/23843 | 0.116506 | 0.631366 | 0.621921 | Rem2    |
| GO_BP_m4GO:19018E negative re1/727   | 4/23843 | 0.116506 | 0.631366 | 0.621921 | Pid1    |
| GO_BP_m4GO:190262assembly o1/727     | 4/23843 | 0.116506 | 0.631366 | 0.621921 | Rpl24   |
| GO_BP_m4GO:19027E positive re1/727   | 4/23843 | 0.116506 | 0.631366 | 0.621921 | Pxylp1  |
| GO_BP_m4GO:190274regulation 1/727    | 4/23843 | 0.116506 | 0.631366 | 0.621921 | Zeb2    |
| GO_BP_m4GO:19035C regulation 1/727   | 4/23843 | 0.116506 | 0.631366 | 0.621921 | Vamp8   |
| GO_BP_m4GO:19035C positive re1/727   | 4/23843 | 0.116506 | 0.631366 | 0.621921 | Vamp8   |

|                                     |           |          |          |          |            |
|-------------------------------------|-----------|----------|----------|----------|------------|
| GO_BP_m4GO:190386negative re1/727   | 4/23843   | 0.116506 | 0.631366 | 0.621921 | Rtn4       |
| GO_BP_m4GO:190397positive re1/727   | 4/23843   | 0.116506 | 0.631366 | 0.621921 | Tiam1      |
| GO_BP_m4GO:190577negative re1/727   | 4/23843   | 0.116506 | 0.631366 | 0.621921 | Sox17      |
| GO_BP_m4GO:190588positive re1/727   | 4/23843   | 0.116506 | 0.631366 | 0.621921 | Aurka      |
| GO_BP_m4GO:190590negative re1/727   | 4/23843   | 0.116506 | 0.631366 | 0.621921 | Sox17      |
| GO_BP_m4GO:199080endoplasm1/727     | 4/23843   | 0.116506 | 0.631366 | 0.621921 | Rtn4       |
| GO_BP_m4GO:199096ATP gener1/727     | 4/23843   | 0.116506 | 0.631366 | 0.621921 | Nudt5      |
| GO_BP_m4GO:200035regulation 1/727   | 4/23843   | 0.116506 | 0.631366 | 0.621921 | Astl       |
| GO_BP_m4GO:200052regulation 1/727   | 4/23843   | 0.116506 | 0.631366 | 0.621921 | Lgals3     |
| GO_BP_m4GO:200062regulation 1/727   | 4/23843   | 0.116506 | 0.631366 | 0.621921 | Nbas       |
| GO_BP_m4GO:200062negative re1/727   | 4/23843   | 0.116506 | 0.631366 | 0.621921 | Nbas       |
| GO_BP_m4GO:200066negative re1/727   | 4/23843   | 0.116506 | 0.631366 | 0.621921 | Gas6       |
| GO_BP_m4GO:200118positive re1/727   | 4/23843   | 0.116506 | 0.631366 | 0.621921 | Mapk14     |
| GO_BP_m4GO:200127regulation 1/727   | 4/23843   | 0.116506 | 0.631366 | 0.621921 | Rps3       |
| GO_BP_m4GO:200127negative re1/727   | 4/23843   | 0.116506 | 0.631366 | 0.621921 | Pid1       |
| GO_BP_m4GO:000961response tr19/727  | 462/23843 | 0.116607 | 0.631366 | 0.621921 | 2310075C1  |
| GO_BP_m4GO:004478cilium orga14/727  | 322/23843 | 0.117742 | 0.63507  | 0.625569 | Abcc4/Atxr |
| GO_BP_m4GO:005105regulation 12/727  | 267/23843 | 0.117777 | 0.63507  | 0.625569 | Agap3/Agf  |
| GO_BP_m4GO:000721neuropepti5/727    | 85/23843  | 0.117955 | 0.63507  | 0.625569 | Gpr19/Hcrt |
| GO_BP_m4GO:001071regulation 5/727   | 85/23843  | 0.117955 | 0.63507  | 0.625569 | Ager/Efna1 |
| GO_BP_m4GO:004568regulation 5/727   | 85/23843  | 0.117955 | 0.63507  | 0.625569 | Ager/Dusp  |
| GO_BP_m4GO:003021keratinocyt7/727   | 135/23843 | 0.119312 | 0.641656 | 0.632056 | Cdh3/Dsp/  |
| GO_BP_m4GO:005254regulation 17/727  | 407/23843 | 0.119713 | 0.643076 | 0.633455 | Anp32b/Bc  |
| GO_BP_m4GO:000854epidermis c14/727  | 323/23843 | 0.119845 | 0.643076 | 0.633455 | Cdh3/Dsp/  |
| GO_BP_m4GO:190122positive re4/727   | 62/23843  | 0.120463 | 0.645666 | 0.636007 | Ager/Rela/ |
| GO_BP_m4GO:003367negative re11/727  | 241/23843 | 0.120618 | 0.645774 | 0.636113 | Akt1s1/Du  |
| GO_BP_m4GO:003201ARF protei3/727    | 40/23843  | 0.121954 | 0.646365 | 0.636695 | Agap3/Agf  |
| GO_BP_m4GO:003201regulation 3/727   | 40/23843  | 0.121954 | 0.646365 | 0.636695 | Agap3/Agf  |
| GO_BP_m4GO:008600cardiac mu3/727    | 40/23843  | 0.121954 | 0.646365 | 0.636695 | Cacna1g/D  |
| GO_BP_m4GO:003461response tr9/727   | 188/23843 | 0.122237 | 0.646365 | 0.636695 | Gas6/Mapk  |
| GO_BP_m4GO:000658melanin m2/727     | 20/23843  | 0.123027 | 0.646365 | 0.636695 | Cdh3/Zeb2  |
| GO_BP_m4GO:000688cellular soc2/727  | 20/23843  | 0.123027 | 0.646365 | 0.636695 | Atp1b4/Slc |
| GO_BP_m4GO:000920deoxyribor2/727    | 20/23843  | 0.123027 | 0.646365 | 0.636695 | Ak3/Dguok  |
| GO_BP_m4GO:001943removal of2/727    | 20/23843  | 0.123027 | 0.646365 | 0.636695 | Apoa4/Mp   |
| GO_BP_m4GO:003128positive re2/727   | 20/23843  | 0.123027 | 0.646365 | 0.636695 | Mapk14/Ts  |
| GO_BP_m4GO:003144regulation 2/727   | 20/23843  | 0.123027 | 0.646365 | 0.636695 | Nelfe/Zfp3 |
| GO_BP_m4GO:003633dendritic c2/727   | 20/23843  | 0.123027 | 0.646365 | 0.636695 | Gas6/Retnl |
| GO_BP_m4GO:004350skeletal m2/727    | 20/23843  | 0.123027 | 0.646365 | 0.636695 | Gtf2ird1/N |
| GO_BP_m4GO:005181disruption 2/727   | 20/23843  | 0.123027 | 0.646365 | 0.636695 | Mbl1/Mbl2  |
| GO_BP_m4GO:005188killing of c2/727  | 20/23843  | 0.123027 | 0.646365 | 0.636695 | Mbl1/Mbl2  |
| GO_BP_m4GO:007016negative re2/727   | 20/23843  | 0.123027 | 0.646365 | 0.636695 | Gas6/Gata  |
| GO_BP_m4GO:009038phagosom2/727      | 20/23843  | 0.123027 | 0.646365 | 0.636695 | Rab31/Rab  |
| GO_BP_m4GO:190138negative re2/727   | 20/23843  | 0.123027 | 0.646365 | 0.636695 | Cbarp/Rerr |
| GO_BP_m4GO:000726small GTPa20/727   | 495/23843 | 0.124222 | 0.649487 | 0.63977  | Agap3/Agf  |
| GO_BP_m4GO:005134positive re20/727  | 495/23843 | 0.124222 | 0.649487 | 0.63977  | Apoa4/Arh  |
| GO_BP_m4GO:003109stress-activ12/727 | 270/23843 | 0.124825 | 0.649487 | 0.63977  | Ager/Dusp  |
| GO_BP_m4GO:006099dendritic s4/727   | 63/23843  | 0.125721 | 0.649487 | 0.63977  | Arc/Efna1/ |
| GO_BP_m4GO:009730cellular res4/727  | 63/23843  | 0.125721 | 0.649487 | 0.63977  | Ctnna1/Inh |

|                                |        |           |          |          |         |             |
|--------------------------------|--------|-----------|----------|----------|---------|-------------|
| GO_BP_m4GO:00719C positive re  | 13/727 | 298/23843 | 0.12583  | 0.649487 | 0.63977 | Ager/Cspg   |
| GO_BP_m4GO:00072E neurotrans   | 7/727  | 137/23843 | 0.126133 | 0.649487 | 0.63977 | Cacna1b/H   |
| GO_BP_m4GO:009964 signal rele  | 7/727  | 137/23843 | 0.126133 | 0.649487 | 0.63977 | Cacna1b/H   |
| GO_BP_m4GO:004632 glucose im   | 5/727  | 87/23843  | 0.126712 | 0.649487 | 0.63977 | C1qtnf12/F  |
| GO_BP_m4GO:004484 cell cycle   | G9/727 | 190/23843 | 0.128021 | 0.649487 | 0.63977 | Anp32b/Bt   |
| GO_BP_m4GO:005077 regulation   | 9/727  | 190/23843 | 0.128021 | 0.649487 | 0.63977 | Anapc2/Efr  |
| GO_BP_m4GO:00062E base-excisi  | 3/727  | 41/23843  | 0.12877  | 0.649487 | 0.63977 | Polb/Rps3/  |
| GO_BP_m4GO:00987E detoxificati | 3/727  | 41/23843  | 0.12877  | 0.649487 | 0.63977 | Apoa4/Mp    |
| GO_BP_m4GO:009892 vesicle-me   | 3/727  | 41/23843  | 0.12877  | 0.649487 | 0.63977 | Kif16b/Ptp  |
| GO_BP_m4GO:001603 viral proce  | 12/727 | 272/23843 | 0.129653 | 0.649487 | 0.63977 | A230050P2   |
| GO_BP_m4GO:005073 regulation   | 11/727 | 245/23843 | 0.130763 | 0.649487 | 0.63977 | Cspg4/Efn   |
| GO_BP_m4GO:004692 regulation   | 4/727  | 64/23843  | 0.131074 | 0.649487 | 0.63977 | Cacna1b/H   |
| GO_BP_m4GO:003134 regulation   | 5/727  | 88/23843  | 0.131199 | 0.649487 | 0.63977 | Ager/Dnas   |
| GO_BP_m4GO:00507E regulation   | 5/727  | 88/23843  | 0.131199 | 0.649487 | 0.63977 | Ager/Gas6,  |
| GO_BP_m4GO:000193 negative re  | 17/727 | 413/23843 | 0.131261 | 0.649487 | 0.63977 | Ager/Akt1s  |
| GO_BP_m4GO:003572 sodium ion   | 6/727  | 113/23843 | 0.131652 | 0.649487 | 0.63977 | Atp1b4/Cn   |
| GO_BP_m4GO:00508E T cell rece  | 6/727  | 113/23843 | 0.131652 | 0.649487 | 0.63977 | Bcl10/Btn2  |
| GO_BP_m4GO:00324C melanoson    | 2/727  | 21/23843  | 0.133352 | 0.649487 | 0.63977 | Cdh3/Mre    |
| GO_BP_m4GO:00330C positive re  | 2/727  | 21/23843  | 0.133352 | 0.649487 | 0.63977 | Il13/Vamp   |
| GO_BP_m4GO:003437 plasma lip   | 2/727  | 21/23843  | 0.133352 | 0.649487 | 0.63977 | Apoa4/Pl    |
| GO_BP_m4GO:00433C positive re  | 2/727  | 21/23843  | 0.133352 | 0.649487 | 0.63977 | Il13/Vamp   |
| GO_BP_m4GO:00450E T-helper 1   | 2/727  | 21/23843  | 0.133352 | 0.649487 | 0.63977 | Il27/Socs5  |
| GO_BP_m4GO:004613 pyrimidine   | 2/727  | 21/23843  | 0.133352 | 0.649487 | 0.63977 | Ak3/Nme5    |
| GO_BP_m4GO:00902E positive re  | 2/727  | 21/23843  | 0.133352 | 0.649487 | 0.63977 | Lgals3/Trp  |
| GO_BP_m4GO:19020C regulation   | 2/727  | 21/23843  | 0.133352 | 0.649487 | 0.63977 | Efna1/Tme   |
| GO_BP_m4GO:200067 negative re  | 2/727  | 21/23843  | 0.133352 | 0.649487 | 0.63977 | Ddit3/Gata  |
| GO_BP_m4GO:200127 regulation   | 2/727  | 21/23843  | 0.133352 | 0.649487 | 0.63977 | Ffar3/Pid1  |
| GO_BP_m4GO:00330E cellular pig | 3/727  | 42/23843  | 0.135717 | 0.649487 | 0.63977 | Cdh3/Mre    |
| GO_BP_m4GO:00518E negative re  | 3/727  | 42/23843  | 0.135717 | 0.649487 | 0.63977 | Btn2a2/Dd   |
| GO_BP_m4GO:19013E regulation   | 3/727  | 42/23843  | 0.135717 | 0.649487 | 0.63977 | Cbarp/Kc    |
| GO_BP_m4GO:00140E regulation   | 5/727  | 89/23843  | 0.135757 | 0.649487 | 0.63977 | Btn2a2/Erb  |
| GO_BP_m4GO:000253 production   | 4/727  | 65/23843  | 0.136519 | 0.649487 | 0.63977 | Dusp10/Mi   |
| GO_BP_m4GO:00481E regulation   | 4/727  | 65/23843  | 0.136519 | 0.649487 | 0.63977 | Arc/Neur1   |
| GO_BP_m4GO:00455E regulation   | 7/727  | 140/23843 | 0.136724 | 0.649487 | 0.63977 | Btn2a2/Du   |
| GO_BP_m4GO:00323E regulation   | 17/727 | 417/23843 | 0.139307 | 0.649487 | 0.63977 | Cdh3/Erbb   |
| GO_BP_m4GO:00068E ER to Golgi  | 6/727  | 115/23843 | 0.139664 | 0.649487 | 0.63977 | Lman1/Se    |
| GO_BP_m4GO:003461 cellular res | 7/727  | 141/23843 | 0.140349 | 0.649487 | 0.63977 | Agap3/Apc   |
| GO_BP_m4GO:004273 drug catab   | 7/727  | 141/23843 | 0.140349 | 0.649487 | 0.63977 | Apoa4/Ctb   |
| GO_BP_m4GO:000202 regulation   | 5/727  | 90/23843  | 0.140385 | 0.649487 | 0.63977 | Cacna1g/D   |
| GO_BP_m4GO:00714E cellular res | 5/727  | 90/23843  | 0.140385 | 0.649487 | 0.63977 | Fndc1/Hp1   |
| GO_BP_m4GO:19011E regulation   | 4/727  | 66/23843  | 0.142055 | 0.649487 | 0.63977 | Esr2/Neur1  |
| GO_BP_m4GO:000191 T cell medi  | 3/727  | 43/23843  | 0.14279  | 0.649487 | 0.63977 | Ager/Muc4   |
| GO_BP_m4GO:00301E proteoglyc   | 3/727  | 43/23843  | 0.14279  | 0.649487 | 0.63977 | Lipc/Pxylp1 |
| GO_BP_m4GO:00311C axon reger   | 3/727  | 43/23843  | 0.14279  | 0.649487 | 0.63977 | Folr1/Rtn4, |
| GO_BP_m4GO:00327E positive re  | 3/727  | 43/23843  | 0.14279  | 0.649487 | 0.63977 | Bcl10/Ddit  |
| GO_BP_m4GO:00713E cellular res | 3/727  | 43/23843  | 0.14279  | 0.649487 | 0.63977 | Mir155/Sst  |
| GO_BP_m4GO:20012E negative re  | 3/727  | 43/23843  | 0.14279  | 0.649487 | 0.63977 | Cbarp/Kc    |
| GO_BP_m4GO:004642 regulation   | 9/727  | 195/23843 | 0.143101 | 0.649487 | 0.63977 | Flrt1/Ifna1 |

|                                             |         |          |          |         |          |
|---------------------------------------------|---------|----------|----------|---------|----------|
| GO_BP_m4GO:000035mRNA 5'-s1/727             | 5/23843 | 0.143449 | 0.649487 | 0.63977 | Snrpc    |
| GO_BP_m4GO:000187response to 1/727          | 5/23843 | 0.143449 | 0.649487 | 0.63977 | Mpo      |
| GO_BP_m4GO:000224connective 1/727           | 5/23843 | 0.143449 | 0.649487 | 0.63977 | Ager     |
| GO_BP_m4GO:000225T cell activation 1/727    | 5/23843 | 0.143449 | 0.649487 | 0.63977 | Lgals3   |
| GO_BP_m4GO:000290mature B cell 1/727        | 5/23843 | 0.143449 | 0.649487 | 0.63977 | Bcl10    |
| GO_BP_m4GO:000290regulation 1/727           | 5/23843 | 0.143449 | 0.649487 | 0.63977 | Bcl10    |
| GO_BP_m4GO:000290negative regulation 1/727  | 5/23843 | 0.143449 | 0.649487 | 0.63977 | Bcl10    |
| GO_BP_m4GO:000319endocardium 1/727          | 5/23843 | 0.143449 | 0.649487 | 0.63977 | Efna1    |
| GO_BP_m4GO:000330negative regulation 1/727  | 5/23843 | 0.143449 | 0.649487 | 0.63977 | Sox17    |
| GO_BP_m4GO:000616AMP biosynthesis 1/727     | 5/23843 | 0.143449 | 0.649487 | 0.63977 | Prps2    |
| GO_BP_m4GO:000628base-excision 1/727        | 5/23843 | 0.143449 | 0.649487 | 0.63977 | Polb     |
| GO_BP_m4GO:000643phenylalanine 1/727        | 5/23843 | 0.143449 | 0.649487 | 0.63977 | Fars2    |
| GO_BP_m4GO:000715G-protein coupled 1/727    | 5/23843 | 0.143449 | 0.649487 | 0.63977 | Gnat1    |
| GO_BP_m4GO:000725activation 1/727           | 5/23843 | 0.143449 | 0.649487 | 0.63977 | Map3k11  |
| GO_BP_m4GO:000911xanthine catabolism 1/727  | 5/23843 | 0.143449 | 0.649487 | 0.63977 | Aox3     |
| GO_BP_m4GO:000918ribonucleoside 1/727       | 5/23843 | 0.143449 | 0.649487 | 0.63977 | Ak3      |
| GO_BP_m4GO:000940toxin biosynthesis 1/727   | 5/23843 | 0.143449 | 0.649487 | 0.63977 | Cyp1a2   |
| GO_BP_m4GO:000975carbohydrate 1/727         | 5/23843 | 0.143449 | 0.649487 | 0.63977 | Ager     |
| GO_BP_m4GO:000975hexose metabolism 1/727    | 5/23843 | 0.143449 | 0.649487 | 0.63977 | Ager     |
| GO_BP_m4GO:001018sugar metabolism 1/727     | 5/23843 | 0.143449 | 0.649487 | 0.63977 | Ager     |
| GO_BP_m4GO:001025glucose metabolism 1/727   | 5/23843 | 0.143449 | 0.649487 | 0.63977 | Ager     |
| GO_BP_m4GO:001051positive regulation 1/727  | 5/23843 | 0.143449 | 0.649487 | 0.63977 | Htr2c    |
| GO_BP_m4GO:001060positive regulation 1/727  | 5/23843 | 0.143449 | 0.649487 | 0.63977 | Cnot6    |
| GO_BP_m4GO:001402notochord 1/727            | 5/23843 | 0.143449 | 0.649487 | 0.63977 | Efna1    |
| GO_BP_m4GO:001404positive regulation 1/727  | 5/23843 | 0.143449 | 0.649487 | 0.63977 | Ret      |
| GO_BP_m4GO:001404establishment 1/727        | 5/23843 | 0.143449 | 0.649487 | 0.63977 | Abcb1b   |
| GO_BP_m4GO:001588folic acid transport 1/727 | 5/23843 | 0.143449 | 0.649487 | 0.63977 | Folr1    |
| GO_BP_m4GO:002175forebrain anterior 1/727   | 5/23843 | 0.143449 | 0.649487 | 0.63977 | Fezf1    |
| GO_BP_m4GO:002304neuronal signaling 1/727   | 5/23843 | 0.143449 | 0.649487 | 0.63977 | Rtn4r    |
| GO_BP_m4GO:003022eosinophil 1/727           | 5/23843 | 0.143449 | 0.649487 | 0.63977 | Gata1    |
| GO_BP_m4GO:003026apoptotic cell 1/727       | 5/23843 | 0.143449 | 0.649487 | 0.63977 | Ern2     |
| GO_BP_m4GO:003057PML body 1/727             | 5/23843 | 0.143449 | 0.649487 | 0.63977 | Agap3    |
| GO_BP_m4GO:003207positive regulation 1/727  | 5/23843 | 0.143449 | 0.649487 | 0.63977 | Rps3     |
| GO_BP_m4GO:003248Ral protein 1/727          | 5/23843 | 0.143449 | 0.649487 | 0.63977 | Ralgsps1 |
| GO_BP_m4GO:003284regulation 1/727           | 5/23843 | 0.143449 | 0.649487 | 0.63977 | Car2     |
| GO_BP_m4GO:003291positive regulation 1/727  | 5/23843 | 0.143449 | 0.649487 | 0.63977 | Lum      |
| GO_BP_m4GO:003308negative regulation 1/727  | 5/23843 | 0.143449 | 0.649487 | 0.63977 | Erbp2    |
| GO_BP_m4GO:003596COPI-coat 1/727            | 5/23843 | 0.143449 | 0.649487 | 0.63977 | Tmed10   |
| GO_BP_m4GO:003626RNA (guanine) 1/727        | 5/23843 | 0.143449 | 0.649487 | 0.63977 | Wdr4     |
| GO_BP_m4GO:004213meiotic DNA 1/727          | 5/23843 | 0.143449 | 0.649487 | 0.63977 | Gm960    |
| GO_BP_m4GO:004227error-prone 1/727          | 5/23843 | 0.143449 | 0.649487 | 0.63977 | Polk     |
| GO_BP_m4GO:004270progesterone 1/727         | 5/23843 | 0.143449 | 0.649487 | 0.63977 | Inhba    |
| GO_BP_m4GO:004483cell quiescence 1/727      | 5/23843 | 0.143449 | 0.649487 | 0.63977 | Nfatc1   |
| GO_BP_m4GO:004563positive regulation 1/727  | 5/23843 | 0.143449 | 0.649487 | 0.63977 | Zeb2     |
| GO_BP_m4GO:004599carbon catabolism 1/727    | 5/23843 | 0.143449 | 0.649487 | 0.63977 | Usf2     |
| GO_BP_m4GO:004599carbon catabolism 1/727    | 5/23843 | 0.143449 | 0.649487 | 0.63977 | Usf2     |
| GO_BP_m4GO:004601regulation 1/727           | 5/23843 | 0.143449 | 0.649487 | 0.63977 | Usf2     |
| GO_BP_m4GO:004868regulation 1/727           | 5/23843 | 0.143449 | 0.649487 | 0.63977 | Rtn4     |

|                                     |          |          |          |         |            |
|-------------------------------------|----------|----------|----------|---------|------------|
| GO_BP_m4GO:005103regulation 1/727   | 5/23843  | 0.143449 | 0.649487 | 0.63977 | Rilp       |
| GO_BP_m4GO:005134regulation 1/727   | 5/23843  | 0.143449 | 0.649487 | 0.63977 | Gnat1      |
| GO_BP_m4GO:005138negative re1/727   | 5/23843  | 0.143449 | 0.649487 | 0.63977 | Spry2      |
| GO_BP_m4GO:005166actin cortic1/727  | 5/23843  | 0.143449 | 0.649487 | 0.63977 | Wipf2      |
| GO_BP_m4GO:005215modulator1/727     | 5/23843  | 0.143449 | 0.649487 | 0.63977 | Serpinb9   |
| GO_BP_m4GO:006005apoptotic p1/727   | 5/23843  | 0.143449 | 0.649487 | 0.63977 | Vdr        |
| GO_BP_m4GO:006005positive re1/727   | 5/23843  | 0.143449 | 0.649487 | 0.63977 | Vdr        |
| GO_BP_m4GO:006026regulation 1/727   | 5/23843  | 0.143449 | 0.649487 | 0.63977 | Dusp10     |
| GO_BP_m4GO:006027regulation 1/727   | 5/23843  | 0.143449 | 0.649487 | 0.63977 | Inhba      |
| GO_BP_m4GO:006059chondrobl1/727     | 5/23843  | 0.143449 | 0.649487 | 0.63977 | Fgf4       |
| GO_BP_m4GO:006095endocardia1/727    | 5/23843  | 0.143449 | 0.649487 | 0.63977 | Sox17      |
| GO_BP_m4GO:007131cellular res1/727  | 5/23843  | 0.143449 | 0.649487 | 0.63977 | Rela       |
| GO_BP_m4GO:007168response tr1/727   | 5/23843  | 0.143449 | 0.649487 | 0.63977 | Ctnna1     |
| GO_BP_m4GO:007168cellular res1/727  | 5/23843  | 0.143449 | 0.649487 | 0.63977 | Ctnna1     |
| GO_BP_m4GO:007230positive re1/727   | 5/23843  | 0.143449 | 0.649487 | 0.63977 | Ret        |
| GO_BP_m4GO:007233cellular lact1/727 | 5/23843  | 0.143449 | 0.649487 | 0.63977 | Mme        |
| GO_BP_m4GO:007275cellular res1/727  | 5/23843  | 0.143449 | 0.649487 | 0.63977 | Recql5     |
| GO_BP_m4GO:007552viral transl1/727  | 5/23843  | 0.143449 | 0.649487 | 0.63977 | Eif3a      |
| GO_BP_m4GO:008604membrane 1/727     | 5/23843  | 0.143449 | 0.649487 | 0.63977 | Cacna1g    |
| GO_BP_m4GO:009021negative re1/727   | 5/23843  | 0.143449 | 0.649487 | 0.63977 | Pik3ip1    |
| GO_BP_m4GO:009734ripiptoson1/727    | 5/23843  | 0.143449 | 0.649487 | 0.63977 | Ripk1      |
| GO_BP_m4GO:009774de novo ce1/727    | 5/23843  | 0.143449 | 0.649487 | 0.63977 | Cep152     |
| GO_BP_m4GO:009853de novo ce1/727    | 5/23843  | 0.143449 | 0.649487 | 0.63977 | Cep152     |
| GO_BP_m4GO:009873positive re1/727   | 5/23843  | 0.143449 | 0.649487 | 0.63977 | Slc8a1     |
| GO_BP_m4GO:015000regulation 1/727   | 5/23843  | 0.143449 | 0.649487 | 0.63977 | Ager       |
| GO_BP_m4GO:190102ripiptoson1/727    | 5/23843  | 0.143449 | 0.649487 | 0.63977 | Ripk1      |
| GO_BP_m4GO:190233positive re1/727   | 5/23843  | 0.143449 | 0.649487 | 0.63977 | Vdr        |
| GO_BP_m4GO:190291negative re1/727   | 5/23843  | 0.143449 | 0.649487 | 0.63977 | Trip12     |
| GO_BP_m4GO:190351regulation 1/727   | 5/23843  | 0.143449 | 0.649487 | 0.63977 | Vdr        |
| GO_BP_m4GO:190352positive re1/727   | 5/23843  | 0.143449 | 0.649487 | 0.63977 | Vdr        |
| GO_BP_m4GO:190375negative re1/727   | 5/23843  | 0.143449 | 0.649487 | 0.63977 | Dusp10     |
| GO_BP_m4GO:190391negative re1/727   | 5/23843  | 0.143449 | 0.649487 | 0.63977 | Ppp1r15b   |
| GO_BP_m4GO:190474positive re1/727   | 5/23843  | 0.143449 | 0.649487 | 0.63977 | Vdr        |
| GO_BP_m4GO:200000negative re1/727   | 5/23843  | 0.143449 | 0.649487 | 0.63977 | Thoc5      |
| GO_BP_m4GO:200096positive re1/727   | 5/23843  | 0.143449 | 0.649487 | 0.63977 | Arc        |
| GO_BP_m4GO:000191negative re2/727   | 22/23843 | 0.143863 | 0.649487 | 0.63977 | Muc4/Serp  |
| GO_BP_m4GO:003563response tr2/727   | 22/23843 | 0.143863 | 0.649487 | 0.63977 | Apoa4/Usp  |
| GO_BP_m4GO:004485hair cycle p2/727  | 22/23843 | 0.143863 | 0.649487 | 0.63977 | Cdh3/Mre   |
| GO_BP_m4GO:004560positive re2/727   | 22/23843 | 0.143863 | 0.649487 | 0.63977 | Ovol2/Vdr  |
| GO_BP_m4GO:005085positive re2/727   | 22/23843 | 0.143863 | 0.649487 | 0.63977 | Rela/Rps3  |
| GO_BP_m4GO:005085negative re2/727   | 22/23843 | 0.143863 | 0.649487 | 0.63977 | Btn2a2/Lga |
| GO_BP_m4GO:005160response tr2/727   | 22/23843 | 0.143863 | 0.649487 | 0.63977 | Gnat1/Grm  |
| GO_BP_m4GO:005187pigment gr2/727    | 22/23843 | 0.143863 | 0.649487 | 0.63977 | Cdh3/Mre   |
| GO_BP_m4GO:006007synapse m2/727     | 22/23843 | 0.143863 | 0.649487 | 0.63977 | Anapc2/Ne  |
| GO_BP_m4GO:007145cellular res2/727  | 22/23843 | 0.143863 | 0.649487 | 0.63977 | Apoa4/Mp   |
| GO_BP_m4GO:007145cellular res2/727  | 22/23843 | 0.143863 | 0.649487 | 0.63977 | Apoa4/Mp   |
| GO_BP_m4GO:190138negative re2/727   | 22/23843 | 0.143863 | 0.649487 | 0.63977 | Kcne1/Ned  |
| GO_BP_m4GO:190288positive re2/727   | 22/23843 | 0.143863 | 0.649487 | 0.63977 | Ripk1/Sfpq |

|                   |               |        |           |          |          |          |              |
|-------------------|---------------|--------|-----------|----------|----------|----------|--------------|
| GO_BP_m4GO:000683 | neurotrans    | 11/727 | 250/23843 | 0.144075 | 0.649835 | 0.640113 | Cacna1b/H    |
| GO_BP_m4GO:003447 | ncRNA pro     | 14/727 | 335/23843 | 0.146768 | 0.661357 | 0.651463 | Dus2/Eri2/I  |
| GO_BP_m4GO:000602 | proteoglyc    | 4/727  | 67/23843  | 0.147677 | 0.662954 | 0.653035 | Lipc/Pxylp1  |
| GO_BP_m4GO:000617 | cAMP bios     | 4/727  | 67/23843  | 0.147677 | 0.662954 | 0.653035 | Cap2/Gngi    |
| GO_BP_m4GO:009715 | execution     | 4/727  | 67/23843  | 0.147677 | 0.662954 | 0.653035 | Bcl10/Dnase  |
| GO_BP_m4GO:009917 | regulation    | 4/727  | 67/23843  | 0.147677 | 0.662954 | 0.653035 | Arc/Efna1/I  |
| GO_BP_m4GO:006095 | dendritic st  | 6/727  | 117/23843 | 0.147898 | 0.663319 | 0.653396 | Arc/Efna1/I  |
| GO_BP_m4GO:190485 | regulation    | 9/727  | 197/23843 | 0.149375 | 0.667261 | 0.657279 | Flrt1/Ifna12 |
| GO_BP_m4GO:000202 | regulation    | 5/727  | 92/23843  | 0.149842 | 0.667261 | 0.657279 | Cnksr3/Fxy   |
| GO_BP_m4GO:005181 | modificati    | 5/727  | 92/23843  | 0.149842 | 0.667261 | 0.657279 | Mbl1/Mbl2    |
| GO_BP_m4GO:005185 | membrane      | 5/727  | 92/23843  | 0.149842 | 0.667261 | 0.657279 | Cacna1b/C    |
| GO_BP_m4GO:000247 | antigen pr    | 3/727  | 44/23843  | 0.149982 | 0.667261 | 0.657279 | H2-M10.1/    |
| GO_BP_m4GO:007025 | regulation    | 3/727  | 44/23843  | 0.149982 | 0.667261 | 0.657279 | Efna1/Lgal   |
| GO_BP_m4GO:007167 | regulation    | 3/727  | 44/23843  | 0.149982 | 0.667261 | 0.657279 | C3ar1/Lgal   |
| GO_BP_m4GO:006040 | calcium io    | 7/727  | 144/23843 | 0.151497 | 0.667261 | 0.657279 | Cacna1g/D    |
| GO_BP_m4GO:005080 | synapse or    | 14/727 | 337/23843 | 0.151551 | 0.667261 | 0.657279 | Anapc2/Ar    |
| GO_BP_m4GO:005068 | regulation    | 6/727  | 118/23843 | 0.152095 | 0.667261 | 0.657279 | Nelfe/Rbfo   |
| GO_BP_m4GO:009015 | establishm    | 9/727  | 198/23843 | 0.152562 | 0.667261 | 0.657279 | Blzf1/Erbp2  |
| GO_BP_m4GO:003241 | negative re   | 4/727  | 68/23843  | 0.153385 | 0.667261 | 0.657279 | Cbarp/Kcne   |
| GO_BP_m4GO:000015 | establishm    | 2/727  | 23/23843  | 0.154539 | 0.667261 | 0.657279 | Spdl1/Spry   |
| GO_BP_m4GO:000075 | DNA catab     | 2/727  | 23/23843  | 0.154539 | 0.667261 | 0.657279 | Dnase1/Dn    |
| GO_BP_m4GO:000290 | negative re   | 2/727  | 23/23843  | 0.154539 | 0.667261 | 0.657279 | Bcl10/Irs2   |
| GO_BP_m4GO:001095 | positive re   | 2/727  | 23/23843  | 0.154539 | 0.667261 | 0.657279 | Astl/F12     |
| GO_BP_m4GO:004204 | fluid trans   | 2/727  | 23/23843  | 0.154539 | 0.667261 | 0.657279 | Aqp9/Mip     |
| GO_BP_m4GO:004435 | glucose im    | 2/727  | 23/23843  | 0.154539 | 0.667261 | 0.657279 | Ffar3/Pid1   |
| GO_BP_m4GO:004835 | mesoderm      | 2/727  | 23/23843  | 0.154539 | 0.667261 | 0.657279 | Inhba/Sox1   |
| GO_BP_m4GO:007127 | cellular res  | 2/727  | 23/23843  | 0.154539 | 0.667261 | 0.657279 | Cyp1a2/Mt    |
| GO_BP_m4GO:007131 | cellular res  | 2/727  | 23/23843  | 0.154539 | 0.667261 | 0.657279 | Recql5/Slc   |
| GO_BP_m4GO:008971 | amino acid    | 2/727  | 23/23843  | 0.154539 | 0.667261 | 0.657279 | Slc1a5/Slc1  |
| GO_BP_m4GO:009885 | cellular ox   | 2/727  | 23/23843  | 0.154539 | 0.667261 | 0.657279 | Apoa4/Mp     |
| GO_BP_m4GO:014011 | export ac     | 2/727  | 23/23843  | 0.154539 | 0.667261 | 0.657279 | Atp1b4/Slc   |
| GO_BP_m4GO:001082 | regulation    | 5/727  | 93/23843  | 0.15467  | 0.667261 | 0.657279 | C1qtnf12/F   |
| GO_BP_m4GO:005192 | regulation    | 11/727 | 254/23843 | 0.155218 | 0.667261 | 0.657279 | Cacna1b/C    |
| GO_BP_m4GO:006055 | developme     | 11/727 | 254/23843 | 0.155218 | 0.667261 | 0.657279 | Anapc2/Au    |
| GO_BP_m4GO:004801 | inositol lipi | 7/727  | 145/23843 | 0.155302 | 0.667261 | 0.657279 | Btn2a2/Erb   |
| GO_BP_m4GO:007135 | cellular res  | 8/727  | 172/23843 | 0.156251 | 0.667261 | 0.657279 | Gas6/Mapk    |
| GO_BP_m4GO:000705 | Golgi orga    | 6/727  | 119/23843 | 0.156345 | 0.667261 | 0.657279 | Blzf1/Gak/l  |
| GO_BP_m4GO:001405 | phosphatic    | 6/727  | 119/23843 | 0.156345 | 0.667261 | 0.657279 | Btn2a2/Erb   |
| GO_BP_m4GO:000657 | cellular bio  | 3/727  | 45/23843  | 0.157288 | 0.667261 | 0.657279 | Abhd4/Gdq    |
| GO_BP_m4GO:003278 | regulation    | 3/727  | 45/23843  | 0.157288 | 0.667261 | 0.657279 | Nelfe/Recq   |
| GO_BP_m4GO:004484 | biological    | 4/727  | 45/23843  | 0.157288 | 0.667261 | 0.657279 | Cdh3/Mreg    |
| GO_BP_m4GO:005075 | activated T   | 3/727  | 45/23843  | 0.157288 | 0.667261 | 0.657279 | Ager/Btn2a   |
| GO_BP_m4GO:005087 | brown fat     | 3/727  | 45/23843  | 0.157288 | 0.667261 | 0.657279 | Dusp10/Mi    |
| GO_BP_m4GO:007138 | cellular res  | 3/727  | 45/23843  | 0.157288 | 0.667261 | 0.657279 | Mir155/Sst   |
| GO_BP_m4GO:001095 | regulation    | 16/727 | 397/23843 | 0.158106 | 0.667261 | 0.657279 | Ager/Cacn    |
| GO_BP_m4GO:009955 | presynaptic   | 7/727  | 146/23843 | 0.159151 | 0.667261 | 0.657279 | Cacna1b/H    |
| GO_BP_m4GO:003241 | positive re   | 5/727  | 94/23843  | 0.159561 | 0.667261 | 0.657279 | Ager/Arc/C   |
| GO_BP_m4GO:190355 | regulation    | 6/727  | 120/23843 | 0.160646 | 0.667261 | 0.657279 | Erbp2/Kcne   |

|                   |                                             |        |           |          |          |          |             |
|-------------------|---------------------------------------------|--------|-----------|----------|----------|----------|-------------|
| GO_BP_m4GO:006048 | mesenchymal cell differentiation            | 11/727 | 256/23843 | 0.16095  | 0.667261 | 0.657279 | Ager/Efna1  |
| GO_BP_m4GO:007259 | reactive oxygen species metabolic process   | 11/727 | 256/23843 | 0.16095  | 0.667261 | 0.657279 | Ager/Apoa   |
| GO_BP_m4GO:007169 | anatomical structure morphogenesis          | 8/727  | 174/23843 | 0.163336 | 0.667261 | 0.657279 | Aurka/Cdh   |
| GO_BP_m4GO:000024 | spliceosome assembly                        | 3/727  | 46/23843  | 0.164701 | 0.667261 | 0.657279 | Luc7l3/Snrp |
| GO_BP_m4GO:005118 | cofactor activity                           | 3/727  | 46/23843  | 0.164701 | 0.667261 | 0.657279 | Apoa4/Mp    |
| GO_BP_m4GO:006004 | regulation of gene expression               | 3/727  | 46/23843  | 0.164701 | 0.667261 | 0.657279 | Mapk14/M    |
| GO_BP_m4GO:190165 | glycosylated protein metabolic process      | 6/727  | 121/23843 | 0.164998 | 0.667261 | 0.657279 | Ak3/Dguok   |
| GO_BP_m4GO:005072 | regulation of cell growth                   | 13/727 | 314/23843 | 0.165237 | 0.667261 | 0.657279 | Ager/Dnas   |
| GO_BP_m4GO:000308 | negative regulation of cell growth          | 2/727  | 24/23843  | 0.165361 | 0.667261 | 0.657279 | Kcnk6/Ned   |
| GO_BP_m4GO:000964 | entrainment                                 | 2/727  | 24/23843  | 0.165361 | 0.667261 | 0.657279 | Sik1/Sox14  |
| GO_BP_m4GO:001482 | vascular smooth muscle cell morphogenesis   | 2/727  | 24/23843  | 0.165361 | 0.667261 | 0.657279 | Cacna1g/S   |
| GO_BP_m4GO:001943 | triglyceride metabolic process              | 2/727  | 24/23843  | 0.165361 | 0.667261 | 0.657279 | Apoa4/Lipc  |
| GO_BP_m4GO:003368 | regulation of gene expression               | 2/727  | 24/23843  | 0.165361 | 0.667261 | 0.657279 | Gata1/Tnn   |
| GO_BP_m4GO:003406 | protein localization                        | 2/727  | 24/23843  | 0.165361 | 0.667261 | 0.657279 | Arl5a/Gak   |
| GO_BP_m4GO:005099 | positive regulation of cell growth          | 2/727  | 24/23843  | 0.165361 | 0.667261 | 0.657279 | Apoa4/Irs2  |
| GO_BP_m4GO:006500 | protein-lipid complex assembly              | 2/727  | 24/23843  | 0.165361 | 0.667261 | 0.657279 | Apoa4/Plaq  |
| GO_BP_m4GO:190101 | positive regulation of cell growth          | 2/727  | 24/23843  | 0.165361 | 0.667261 | 0.657279 | Ager/Kcne   |
| GO_BP_m4GO:006029 | long-term cell growth                       | 10/727 | 230/23843 | 0.166667 | 0.667261 | 0.657279 | Ager/Arc/N  |
| GO_BP_m4GO:000690 | vesicle fusion                              | 7/727  | 148/23843 | 0.166977 | 0.667261 | 0.657279 | Rundc1/Se   |
| GO_BP_m4GO:000704 | cell-cell junction assembly                 | 5/727  | 96/23843  | 0.169527 | 0.667261 | 0.657279 | Cdh24/Cdh   |
| GO_BP_m4GO:005077 | positive regulation of cell growth          | 5/727  | 96/23843  | 0.169527 | 0.667261 | 0.657279 | Anapc2/Rti  |
| GO_BP_m4GO:000014 | actin cortical cytoskeleton organization    | 1/727  | 6/23843   | 0.169572 | 0.667261 | 0.657279 | Wipf2       |
| GO_BP_m4GO:000253 | respiratory system morphogenesis            | 1/727  | 6/23843   | 0.169572 | 0.667261 | 0.657279 | Dusp10      |
| GO_BP_m4GO:000629 | nucleotide metabolic process                | 1/727  | 6/23843   | 0.169572 | 0.667261 | 0.657279 | Polk        |
| GO_BP_m4GO:000655 | L-phenylalanine metabolic process           | 1/727  | 6/23843   | 0.169572 | 0.667261 | 0.657279 | Fah         |
| GO_BP_m4GO:000657 | tyrosine catabolic process                  | 1/727  | 6/23843   | 0.169572 | 0.667261 | 0.657279 | Fah         |
| GO_BP_m4GO:000716 | receptor glycoprotein metabolic process     | 1/727  | 6/23843   | 0.169572 | 0.667261 | 0.657279 | Gng7        |
| GO_BP_m4GO:000719 | adenylate cyclase activity                  | 1/727  | 6/23843   | 0.169572 | 0.667261 | 0.657279 | Grm1        |
| GO_BP_m4GO:000822 | opsonization                                | 1/727  | 6/23843   | 0.169572 | 0.667261 | 0.657279 | Sftpa1      |
| GO_BP_m4GO:000859 | photoreceptor cell morphogenesis            | 1/727  | 6/23843   | 0.169572 | 0.667261 | 0.657279 | Cabp4       |
| GO_BP_m4GO:000861 | queuosine metabolic process                 | 1/727  | 6/23843   | 0.169572 | 0.667261 | 0.657279 | Pdcl3       |
| GO_BP_m4GO:000863 | cell activation                             | 1/727  | 6/23843   | 0.169572 | 0.667261 | 0.657279 | Cyca        |
| GO_BP_m4GO:000924 | isopentenyl pyrophosphate metabolic process | 1/727  | 6/23843   | 0.169572 | 0.667261 | 0.657279 | Pmvk        |
| GO_BP_m4GO:000964 | response to hypoxia                         | 1/727  | 6/23843   | 0.169572 | 0.667261 | 0.657279 | Gnat1       |
| GO_BP_m4GO:001027 | detoxification                              | 1/727  | 6/23843   | 0.169572 | 0.667261 | 0.657279 | Mt1         |
| GO_BP_m4GO:001074 | regulation of gene expression               | 1/727  | 6/23843   | 0.169572 | 0.667261 | 0.657279 | Irs2        |
| GO_BP_m4GO:001075 | positive regulation of cell growth          | 1/727  | 6/23843   | 0.169572 | 0.667261 | 0.657279 | F12         |
| GO_BP_m4GO:001094 | positive regulation of cell growth          | 1/727  | 6/23843   | 0.169572 | 0.667261 | 0.657279 | Ripk1       |
| GO_BP_m4GO:001405 | acetylcholine receptor activity             | 1/727  | 6/23843   | 0.169572 | 0.667261 | 0.657279 | Htr2c       |
| GO_BP_m4GO:001405 | regulation of gene expression               | 1/727  | 6/23843   | 0.169572 | 0.667261 | 0.657279 | Htr2c       |
| GO_BP_m4GO:001507 | DNA integration                             | 1/727  | 6/23843   | 0.169572 | 0.667261 | 0.657279 | Nynrin      |
| GO_BP_m4GO:001580 | L-alanine transport                         | 1/727  | 6/23843   | 0.169572 | 0.667261 | 0.657279 | Slc1a4      |
| GO_BP_m4GO:001906 | virion attachment                           | 1/727  | 6/23843   | 0.169572 | 0.667261 | 0.657279 | Gas6        |
| GO_BP_m4GO:003308 | negative regulation of cell growth          | 1/727  | 6/23843   | 0.169572 | 0.667261 | 0.657279 | Erbp2       |
| GO_BP_m4GO:003323 | negative regulation of cell growth          | 1/727  | 6/23843   | 0.169572 | 0.667261 | 0.657279 | Htr2c       |
| GO_BP_m4GO:003438 | chylomicron assembly                        | 1/727  | 6/23843   | 0.169572 | 0.667261 | 0.657279 | Lipc        |
| GO_BP_m4GO:003463 | phosphatidylcholine metabolic process       | 1/727  | 6/23843   | 0.169572 | 0.667261 | 0.657279 | Gdpd3       |
| GO_BP_m4GO:004227 | protection from oxidative stress            | 1/727  | 6/23843   | 0.169572 | 0.667261 | 0.657279 | Serpinb9    |



|                  |              |       |         |          |          |          |          |
|------------------|--------------|-------|---------|----------|----------|----------|----------|
| GO_BP_m4GO:00443 | actin cortic | 1/727 | 6/23843 | 0.169572 | 0.667261 | 0.657279 | Wipf2    |
| GO_BP_m4GO:00445 | modulator    | 1/727 | 6/23843 | 0.169572 | 0.667261 | 0.657279 | Serpinb9 |
| GO_BP_m4GO:00445 | modulator    | 1/727 | 6/23843 | 0.169572 | 0.667261 | 0.657279 | Serpinb9 |
| GO_BP_m4GO:00447 | modulator    | 1/727 | 6/23843 | 0.169572 | 0.667261 | 0.657279 | Zfp72    |
| GO_BP_m4GO:00447 | positive re  | 1/727 | 6/23843 | 0.169572 | 0.667261 | 0.657279 | Zfp72    |
| GO_BP_m4GO:00450 | protein im   | 1/727 | 6/23843 | 0.169572 | 0.667261 | 0.657279 | Tomm7    |
| GO_BP_m4GO:00455 | positive re  | 1/727 | 6/23843 | 0.169572 | 0.667261 | 0.657279 | Lck      |
| GO_BP_m4GO:00456 | negative re  | 1/727 | 6/23843 | 0.169572 | 0.667261 | 0.657279 | Socs5    |
| GO_BP_m4GO:00456 | negative re  | 1/727 | 6/23843 | 0.169572 | 0.667261 | 0.657279 | Thoc5    |
| GO_BP_m4GO:00460 | dGTP meta    | 1/727 | 6/23843 | 0.169572 | 0.667261 | 0.657279 | Dguok    |
| GO_BP_m4GO:00461 | xanthine m   | 1/727 | 6/23843 | 0.169572 | 0.667261 | 0.657279 | Aox3     |
| GO_BP_m4GO:00461 | queuosine    | 1/727 | 6/23843 | 0.169572 | 0.667261 | 0.657279 | Pdcl3    |
| GO_BP_m4GO:00464 | glyoxylate   | 1/727 | 6/23843 | 0.169572 | 0.667261 | 0.657279 | Grhpr    |
| GO_BP_m4GO:00464 | isopentenyl  | 1/727 | 6/23843 | 0.169572 | 0.667261 | 0.657279 | Pmvk     |
| GO_BP_m4GO:00466 | positive re  | 1/727 | 6/23843 | 0.169572 | 0.667261 | 0.657279 | Lck      |
| GO_BP_m4GO:00466 | folic acid r | 1/727 | 6/23843 | 0.169572 | 0.667261 | 0.657279 | Folr1    |
| GO_BP_m4GO:00468 | positive re  | 1/727 | 6/23843 | 0.169572 | 0.667261 | 0.657279 | Rbm26    |
| GO_BP_m4GO:00486 | sprouting c  | 1/727 | 6/23843 | 0.169572 | 0.667261 | 0.657279 | Rtn4     |
| GO_BP_m4GO:00488 | diencephal   | 1/727 | 6/23843 | 0.169572 | 0.667261 | 0.657279 | Duox2    |
| GO_BP_m4GO:00488 | stem cell f  | 1/727 | 6/23843 | 0.169572 | 0.667261 | 0.657279 | Sox17    |
| GO_BP_m4GO:00509 | sensory pe   | 1/727 | 6/23843 | 0.169572 | 0.667261 | 0.657279 | Gnat1    |
| GO_BP_m4GO:00520 | modulator    | 1/727 | 6/23843 | 0.169572 | 0.667261 | 0.657279 | Serpinb9 |
| GO_BP_m4GO:00522 | modulator    | 1/727 | 6/23843 | 0.169572 | 0.667261 | 0.657279 | Serpinb9 |
| GO_BP_m4GO:00524 | modulator    | 1/727 | 6/23843 | 0.169572 | 0.667261 | 0.657279 | Serpinb9 |
| GO_BP_m4GO:00600 | regulation   | 1/727 | 6/23843 | 0.169572 | 0.667261 | 0.657279 | Kcnk6    |
| GO_BP_m4GO:00602 | negative re  | 1/727 | 6/23843 | 0.169572 | 0.667261 | 0.657279 | Dusp10   |
| GO_BP_m4GO:00603 | primitive e  | 1/727 | 6/23843 | 0.169572 | 0.667261 | 0.657279 | Gata1    |
| GO_BP_m4GO:00604 | lung growt   | 1/727 | 6/23843 | 0.169572 | 0.667261 | 0.657279 | Spry2    |
| GO_BP_m4GO:00607 | mammary      | 1/727 | 6/23843 | 0.169572 | 0.667261 | 0.657279 | Vdr      |
| GO_BP_m4GO:00709 | regulation   | 1/727 | 6/23843 | 0.169572 | 0.667261 | 0.657279 | Dnase1   |
| GO_BP_m4GO:00712 | cellular res | 1/727 | 6/23843 | 0.169572 | 0.667261 | 0.657279 | Rela     |
| GO_BP_m4GO:00713 | cellular res | 1/727 | 6/23843 | 0.169572 | 0.667261 | 0.657279 | Slc8a1   |
| GO_BP_m4GO:00715 | cellular res | 1/727 | 6/23843 | 0.169572 | 0.667261 | 0.657279 | Ddit3    |
| GO_BP_m4GO:00718 | triglyceride | 1/727 | 6/23843 | 0.169572 | 0.667261 | 0.657279 | Lipc     |
| GO_BP_m4GO:00722 | regulation   | 1/727 | 6/23843 | 0.169572 | 0.667261 | 0.657279 | Ret      |
| GO_BP_m4GO:00860 | bundle of t  | 1/727 | 6/23843 | 0.169572 | 0.667261 | 0.657279 | Dsp      |
| GO_BP_m4GO:00901 | endoplasm    | 1/727 | 6/23843 | 0.169572 | 0.667261 | 0.657279 | Rtn4     |
| GO_BP_m4GO:00903 | negative re  | 1/727 | 6/23843 | 0.169572 | 0.667261 | 0.657279 | Kcne1    |
| GO_BP_m4GO:00905 | endocardia   | 1/727 | 6/23843 | 0.169572 | 0.667261 | 0.657279 | Efna1    |
| GO_BP_m4GO:00975 | necroptotic  | 1/727 | 6/23843 | 0.169572 | 0.667261 | 0.657279 | Ripk1    |
| GO_BP_m4GO:00988 | exocytic in  | 1/727 | 6/23843 | 0.169572 | 0.667261 | 0.657279 | Snap47   |
| GO_BP_m4GO:00989 | exocytic in  | 1/727 | 6/23843 | 0.169572 | 0.667261 | 0.657279 | Snap47   |
| GO_BP_m4GO:01200 | intermemb    | 1/727 | 6/23843 | 0.169572 | 0.667261 | 0.657279 | Plekha8  |
| GO_BP_m4GO:19015 | response tr  | 1/727 | 6/23843 | 0.169572 | 0.667261 | 0.657279 | Recql5   |
| GO_BP_m4GO:19022 | erythrose 4  | 1/727 | 6/23843 | 0.169572 | 0.667261 | 0.657279 | Fah      |
| GO_BP_m4GO:19029 | positive re  | 1/727 | 6/23843 | 0.169572 | 0.667261 | 0.657279 | Efna1    |
| GO_BP_m4GO:19045 | response tr  | 1/727 | 6/23843 | 0.169572 | 0.667261 | 0.657279 | Tshr     |
| GO_BP_m4GO:19052 | positive re  | 1/727 | 6/23843 | 0.169572 | 0.667261 | 0.657279 | Ripk1    |

|                   |               |        |           |          |          |          |             |
|-------------------|---------------|--------|-----------|----------|----------|----------|-------------|
| GO_BP_m4GO:190524 | positive re   | 1/727  | 6/23843   | 0.169572 | 0.667261 | 0.657279 | Efna1       |
| GO_BP_m4GO:199016 | stress resp   | 1/727  | 6/23843   | 0.169572 | 0.667261 | 0.657279 | Mt1         |
| GO_BP_m4GO:199041 | replication   | 1/727  | 6/23843   | 0.169572 | 0.667261 | 0.657279 | Recql5      |
| GO_BP_m4GO:200001 | regulation    | 1/727  | 6/23843   | 0.169572 | 0.667261 | 0.657279 | Ddit3       |
| GO_BP_m4GO:200034 | regulation    | 1/727  | 6/23843   | 0.169572 | 0.667261 | 0.657279 | Fanca       |
| GO_BP_m4GO:200049 | positive re   | 1/727  | 6/23843   | 0.169572 | 0.667261 | 0.657279 | Rps6ka1     |
| GO_BP_m4GO:200058 | regulation    | 1/727  | 6/23843   | 0.169572 | 0.667261 | 0.657279 | Dynll2      |
| GO_BP_m4GO:200058 | positive re   | 1/727  | 6/23843   | 0.169572 | 0.667261 | 0.657279 | Dynll2      |
| GO_BP_m4GO:200063 | positive re   | 1/727  | 6/23843   | 0.169572 | 0.667261 | 0.657279 | Rela        |
| GO_BP_m4GO:200067 | positive re   | 1/727  | 6/23843   | 0.169572 | 0.667261 | 0.657279 | Ager        |
| GO_BP_m4GO:200118 | regulation    | 1/727  | 6/23843   | 0.169572 | 0.667261 | 0.657279 | Mapk14      |
| GO_BP_m4GO:200119 | regulation    | 1/727  | 6/23843   | 0.169572 | 0.667261 | 0.657279 | Ager        |
| GO_BP_m4GO:000669 | steroid bio   | 7/727  | 149/23843 | 0.170953 | 0.671721 | 0.661672 | Akr1d1/Ap   |
| GO_BP_m4GO:001974 | secondary     | 4/727  | 71/23843  | 0.170986 | 0.671721 | 0.661672 | Cdh3/Cyp1   |
| GO_BP_m4GO:007121 | cellular res  | 12/727 | 288/23843 | 0.171865 | 0.673228 | 0.663156 | AY761184/   |
| GO_BP_m4GO:004224 | tissue rege   | 3/727  | 47/23843  | 0.172214 | 0.673228 | 0.663156 | Dusp10/Lg   |
| GO_BP_m4GO:004355 | regulation    | 3/727  | 47/23843  | 0.172214 | 0.673228 | 0.663156 | Pik3ip1/Rb  |
| GO_BP_m4GO:004801 | inositol ph   | 3/727  | 47/23843  | 0.172214 | 0.673228 | 0.663156 | Htr2c/Mir1  |
| GO_BP_m4GO:005193 | regulation    | 3/727  | 47/23843  | 0.172214 | 0.673228 | 0.663156 | Grm1/Htr2   |
| GO_BP_m4GO:005193 | regulation    | 3/727  | 47/23843  | 0.172214 | 0.673228 | 0.663156 | Grm1/Htr2   |
| GO_BP_m4GO:000626 | DNA replic    | 11/727 | 260/23843 | 0.172724 | 0.674667 | 0.664574 | Cenps/Gmi   |
| GO_BP_m4GO:000276 | regulation    | 6/727  | 123/23843 | 0.17385  | 0.678512 | 0.668361 | Car2/Il34/F |
| GO_BP_m4GO:003476 | negative re   | 5/727  | 97/23843  | 0.1746   | 0.680326 | 0.670148 | Cbarp/lrs2, |
| GO_BP_m4GO:200123 | negative re   | 5/727  | 97/23843  | 0.1746   | 0.680326 | 0.670148 | Ctnna1/Ga   |
| GO_BP_m4GO:000030 | response tr   | 2/727  | 25/23843  | 0.17631  | 0.681987 | 0.671784 | Apoa4/Mp    |
| GO_BP_m4GO:000282 | regulation    | 2/727  | 25/23843  | 0.17631  | 0.681987 | 0.671784 | Il27/Socs5  |
| GO_BP_m4GO:004210 | positive re   | 2/727  | 25/23843  | 0.17631  | 0.681987 | 0.671784 | Ager/Rps3   |
| GO_BP_m4GO:004573 | respiratory   | 2/727  | 25/23843  | 0.17631  | 0.681987 | 0.671784 | Dusp10/Mi   |
| GO_BP_m4GO:006004 | positive re   | 2/727  | 25/23843  | 0.17631  | 0.681987 | 0.671784 | Mapk14/Pi   |
| GO_BP_m4GO:006109 | negative re   | 2/727  | 25/23843  | 0.17631  | 0.681987 | 0.671784 | Fam72a/Sc   |
| GO_BP_m4GO:008600 | ventricular   | 2/727  | 25/23843  | 0.17631  | 0.681987 | 0.671784 | Dsp/Nedd4   |
| GO_BP_m4GO:190331 | positive re   | 2/727  | 25/23843  | 0.17631  | 0.681987 | 0.671784 | Astl/F12    |
| GO_BP_m4GO:190385 | regulation    | 2/727  | 25/23843  | 0.17631  | 0.681987 | 0.671784 | Nedd4l/Rtr  |
| GO_BP_m4GO:003569 | cellular res  | 14/727 | 347/23843 | 0.176681 | 0.682464 | 0.672254 | Ctnna1/Dp   |
| GO_BP_m4GO:000208 | lens devel    | 4/727  | 72/23843  | 0.177004 | 0.682464 | 0.672254 | Bfsp2/Lim2  |
| GO_BP_m4GO:003080 | regulation    | 4/727  | 72/23843  | 0.177004 | 0.682464 | 0.672254 | Cap2/Gngi   |
| GO_BP_m4GO:005185 | modificati    | 4/727  | 72/23843  | 0.177004 | 0.682464 | 0.672254 | Mbl1/Mbl2   |
| GO_BP_m4GO:009755 | calcium ior   | 6/727  | 124/23843 | 0.178348 | 0.683305 | 0.673083 | Ddit3/Htr2  |
| GO_BP_m4GO:005265 | cyclic purin  | 5/727  | 98/23843  | 0.179729 | 0.683305 | 0.673083 | Cap2/Gngi   |
| GO_BP_m4GO:000713 | reciprocal    | 3/727  | 48/23843  | 0.179824 | 0.683305 | 0.673083 | Cenps/Brip  |
| GO_BP_m4GO:003582 | homologot     | 3/727  | 48/23843  | 0.179824 | 0.683305 | 0.673083 | Cenps/Brip  |
| GO_BP_m4GO:004650 | glycerolip    | 3/727  | 48/23843  | 0.179824 | 0.683305 | 0.673083 | Apoa4/Gd    |
| GO_BP_m4GO:009865 | inorganic c   | 3/727  | 48/23843  | 0.179824 | 0.683305 | 0.673083 | Slc39a8/Slc |
| GO_BP_m4GO:009958 | inorganic ic  | 3/727  | 48/23843  | 0.179824 | 0.683305 | 0.673083 | Slc39a8/Slc |
| GO_BP_m4GO:200035 | regulation    | 3/727  | 48/23843  | 0.179824 | 0.683305 | 0.673083 | Ager/Gas6   |
| GO_BP_m4GO:002170 | developme     | 12/727 | 291/23843 | 0.180457 | 0.683305 | 0.673083 | Anapc2/Au   |
| GO_BP_m4GO:009719 | intrinsic ap  | 12/727 | 291/23843 | 0.180457 | 0.683305 | 0.673083 | Ddit3/Ern2  |
| GO_BP_m4GO:000007 | cell cycle cl | 8/727  | 179/23843 | 0.181681 | 0.683305 | 0.673083 | Aurka/Hus   |

|                                     |           |          |          |          |             |
|-------------------------------------|-----------|----------|----------|----------|-------------|
| GO_BP_m4GO:005077regulation 8/727   | 179/23843 | 0.181681 | 0.683305 | 0.673083 | Anapc2/Ar   |
| GO_BP_m4GO:005126protein hor14/727  | 349/23843 | 0.181943 | 0.683305 | 0.673083 | Ak3/Atxn1(  |
| GO_BP_m4GO:005254regulation 14/727  | 349/23843 | 0.181943 | 0.683305 | 0.673083 | Anp32b/Bc   |
| GO_BP_m4GO:003476negative re6/727   | 125/23843 | 0.182892 | 0.683305 | 0.673083 | Cbarp/lrs2, |
| GO_BP_m4GO:000191regulation 4/727   | 73/23843  | 0.183092 | 0.683305 | 0.673083 | Ager/Dnas   |
| GO_BP_m4GO:003081regulation 4/727   | 73/23843  | 0.183092 | 0.683305 | 0.673083 | Cap2/Gngi   |
| GO_BP_m4GO:000919cyclic nucle5/727  | 99/23843  | 0.184915 | 0.683305 | 0.673083 | Cap2/Gngi   |
| GO_BP_m4GO:004828organelle fr8/727  | 180/23843 | 0.185454 | 0.683305 | 0.673083 | Chchd6/Ru   |
| GO_BP_m4GO:005073positive re8/727   | 180/23843 | 0.185454 | 0.683305 | 0.673083 | Cspg4/Efn2  |
| GO_BP_m4GO:005065nucleic acic7/727  | 153/23843 | 0.187259 | 0.683305 | 0.673083 | Parp11/Rbi  |
| GO_BP_m4GO:005065RNA trans7/727     | 153/23843 | 0.187259 | 0.683305 | 0.673083 | Parp11/Rbi  |
| GO_BP_m4GO:009017organelle r7/727   | 153/23843 | 0.187259 | 0.683305 | 0.673083 | Rundc1/Se   |
| GO_BP_m4GO:000688cellular zinc2/727 | 26/23843  | 0.187367 | 0.683305 | 0.673083 | Mt1/Slc39a  |
| GO_BP_m4GO:000929mRNA tran2/727     | 26/23843  | 0.187367 | 0.683305 | 0.673083 | Ddit3/Sox1  |
| GO_BP_m4GO:003026apoptotic r2/727   | 26/23843  | 0.187367 | 0.683305 | 0.673083 | Dnase2b/E   |
| GO_BP_m4GO:003031melanocyte2/727    | 26/23843  | 0.187367 | 0.683305 | 0.673083 | Mreg/Zeb2   |
| GO_BP_m4GO:003323regulation 2/727   | 26/23843  | 0.187367 | 0.683305 | 0.673083 | Rela/Ube2i  |
| GO_BP_m4GO:00400Cestablishm2/727    | 26/23843  | 0.187367 | 0.683305 | 0.673083 | Spdl1/Spry  |
| GO_BP_m4GO:004309amino acid2/727    | 26/23843  | 0.187367 | 0.683305 | 0.673083 | Slc1a5/Slc1 |
| GO_BP_m4GO:004595positive re2/727   | 26/23843  | 0.187367 | 0.683305 | 0.673083 | Cacna1g/C   |
| GO_BP_m4GO:006091heart form2/727    | 26/23843  | 0.187367 | 0.683305 | 0.673083 | Folr1/Pim1  |
| GO_BP_m4GO:190299regulation 2/727   | 26/23843  | 0.187367 | 0.683305 | 0.673083 | Efna1/Tme   |
| GO_BP_m4GO:000602aminoglyc3/727     | 49/23843  | 0.187522 | 0.683305 | 0.673083 | B3gnt5/Pxy  |
| GO_BP_m4GO:00069Cvesicle bud3/727   | 49/23843  | 0.187522 | 0.683305 | 0.673083 | Rilp/Sec13, |
| GO_BP_m4GO:004329apical junct3/727  | 49/23843  | 0.187522 | 0.683305 | 0.673083 | Ctnna1/Ne   |
| GO_BP_m4GO:200064regulation 3/727   | 49/23843  | 0.187522 | 0.683305 | 0.673083 | Cnksr3/Fxy  |
| GO_BP_m4GO:004657regulation 10/727  | 237/23843 | 0.189223 | 0.683305 | 0.673083 | Agap3/Agf   |
| GO_BP_m4GO:000257myeloid let9/727   | 209/23843 | 0.189747 | 0.683305 | 0.673083 | Car2/Gata1  |
| GO_BP_m4GO:00903Cnucleic acic6/727  | 127/23843 | 0.192116 | 0.683305 | 0.673083 | Dnase1/Dn   |
| GO_BP_m4GO:004858developme10/727    | 238/23843 | 0.192553 | 0.683305 | 0.673083 | Anapc2/Au   |
| GO_BP_m4GO:000688exocytosis 13/727  | 324/23843 | 0.192698 | 0.683305 | 0.673083 | Cacna1g/C   |
| GO_BP_m4GO:004563regulation 9/727   | 210/23843 | 0.19331  | 0.683305 | 0.673083 | Car2/Gata1  |
| GO_BP_m4GO:190161organic hyc9/727   | 210/23843 | 0.19331  | 0.683305 | 0.673083 | Akr1d1/Ap   |
| GO_BP_m4GO:004306extracellula11/727 | 267/23843 | 0.194285 | 0.683305 | 0.673083 | Apoa4/Elnv  |
| GO_BP_m4GO:000045exonucleol1/727    | 7/23843   | 0.194899 | 0.683305 | 0.673083 | Eri2        |
| GO_BP_m4GO:000046exonucleol1/727    | 7/23843   | 0.194899 | 0.683305 | 0.673083 | Eri2        |
| GO_BP_m4GO:000195blood vess1/727    | 7/23843   | 0.194899 | 0.683305 | 0.673083 | Ddit3       |
| GO_BP_m4GO:000325cardiac net1/727   | 7/23843   | 0.194899 | 0.683305 | 0.673083 | Folr1       |
| GO_BP_m4GO:00033Cregulation 1/727   | 7/23843   | 0.194899 | 0.683305 | 0.673083 | Sox17       |
| GO_BP_m4GO:000334cardiac enc1/727   | 7/23843   | 0.194899 | 0.683305 | 0.673083 | Sox17       |
| GO_BP_m4GO:000614purine nuc1/727    | 7/23843   | 0.194899 | 0.683305 | 0.673083 | Aox3        |
| GO_BP_m4GO:000629pyrimidine 1/727   | 7/23843   | 0.194899 | 0.683305 | 0.673083 | Polb        |
| GO_BP_m4GO:000656tryptophan1/727    | 7/23843   | 0.194899 | 0.683305 | 0.673083 | Kynu        |
| GO_BP_m4GO:000969phenylpro1/727     | 7/23843   | 0.194899 | 0.683305 | 0.673083 | Cyp2a22     |
| GO_BP_m4GO:00098Ccoumarin r1/727    | 7/23843   | 0.194899 | 0.683305 | 0.673083 | Cyp2a22     |
| GO_BP_m4GO:001051regulation 1/727   | 7/23843   | 0.194899 | 0.683305 | 0.673083 | Htr2c       |
| GO_BP_m4GO:001089positive re1/727   | 7/23843   | 0.194899 | 0.683305 | 0.673083 | Apoc4       |
| GO_BP_m4GO:001405positive re1/727   | 7/23843   | 0.194899 | 0.683305 | 0.673083 | Htr2c       |

|                   |                    |         |          |          |          |          |
|-------------------|--------------------|---------|----------|----------|----------|----------|
| GO_BP_m4GO:001605 | rhodopsin 1/727    | 7/23843 | 0.194899 | 0.683305 | 0.673083 | Gnat1    |
| GO_BP_m4GO:001944 | tryptophan1/727    | 7/23843 | 0.194899 | 0.683305 | 0.673083 | Kynu     |
| GO_BP_m4GO:003207 | regulation 1/727   | 7/23843 | 0.194899 | 0.683305 | 0.673083 | Rps3     |
| GO_BP_m4GO:003224 | positive reğ1/727  | 7/23843 | 0.194899 | 0.683305 | 0.673083 | Rbm26    |
| GO_BP_m4GO:003331 | meiotic cel1/727   | 7/23843 | 0.194899 | 0.683305 | 0.673083 | Hus1     |
| GO_BP_m4GO:003386 | regulation 1/727   | 7/23843 | 0.194899 | 0.683305 | 0.673083 | Il13     |
| GO_BP_m4GO:003562 | ceramide tı1/727   | 7/23843 | 0.194899 | 0.683305 | 0.673083 | Plekha8  |
| GO_BP_m4GO:003570 | hematopoi1/727     | 7/23843 | 0.194899 | 0.683305 | 0.673083 | Gas6     |
| GO_BP_m4GO:003575 | B cell chem1/727   | 7/23843 | 0.194899 | 0.683305 | 0.673083 | Gas6     |
| GO_BP_m4GO:003576 | cell chemo1/727    | 7/23843 | 0.194899 | 0.683305 | 0.673083 | Fgf4     |
| GO_BP_m4GO:003576 | endothelial1/727   | 7/23843 | 0.194899 | 0.683305 | 0.673083 | Fgf4     |
| GO_BP_m4GO:003628 | peptidyl-se1/727   | 7/23843 | 0.194899 | 0.683305 | 0.673083 | Ripk1    |
| GO_BP_m4GO:003649 | regulation 1/727   | 7/23843 | 0.194899 | 0.683305 | 0.673083 | Ppp1r15b |
| GO_BP_m4GO:003649 | eiF2alpha ç1/727   | 7/23843 | 0.194899 | 0.683305 | 0.673083 | Ppp1r15b |
| GO_BP_m4GO:004243 | indole-con1/727    | 7/23843 | 0.194899 | 0.683305 | 0.673083 | Kynu     |
| GO_BP_m4GO:004266 | regulation 1/727   | 7/23843 | 0.194899 | 0.683305 | 0.673083 | Sox17    |
| GO_BP_m4GO:004276 | DNA dama1/727      | 7/23843 | 0.194899 | 0.683305 | 0.673083 | Rps3     |
| GO_BP_m4GO:004310 | amino acid1/727    | 7/23843 | 0.194899 | 0.683305 | 0.673083 | Bhmt     |
| GO_BP_m4GO:004465 | adhesion o1/727    | 7/23843 | 0.194899 | 0.683305 | 0.673083 | Gas6     |
| GO_BP_m4GO:004563 | regulation 1/727   | 7/23843 | 0.194899 | 0.683305 | 0.673083 | Zeb2     |
| GO_BP_m4GO:004621 | indolalkyları1/727 | 7/23843 | 0.194899 | 0.683305 | 0.673083 | Kynu     |
| GO_BP_m4GO:004678 | viral mRNA1/727    | 7/23843 | 0.194899 | 0.683305 | 0.673083 | Thoc5    |
| GO_BP_m4GO:004817 | positive reğ1/727  | 7/23843 | 0.194899 | 0.683305 | 0.673083 | Neurl1a  |
| GO_BP_m4GO:005094 | positive reğ1/727  | 7/23843 | 0.194899 | 0.683305 | 0.673083 | Zeb2     |
| GO_BP_m4GO:005169 | pointed-er1/727    | 7/23843 | 0.194899 | 0.683305 | 0.673083 | Tmod2    |
| GO_BP_m4GO:005197 | negative re1/727   | 7/23843 | 0.194899 | 0.683305 | 0.673083 | Hcrt     |
| GO_BP_m4GO:006001 | Sertoli cell 1/727 | 7/23843 | 0.194899 | 0.683305 | 0.673083 | Esr2     |
| GO_BP_m4GO:006031 | definitive e1/727  | 7/23843 | 0.194899 | 0.683305 | 0.673083 | Gata1    |
| GO_BP_m4GO:006044 | bud elongç1/727    | 7/23843 | 0.194899 | 0.683305 | 0.673083 | Spry2    |
| GO_BP_m4GO:006046 | negative re1/727   | 7/23843 | 0.194899 | 0.683305 | 0.673083 | Astl     |
| GO_BP_m4GO:006055 | regulation 1/727   | 7/23843 | 0.194899 | 0.683305 | 0.673083 | Vdr      |
| GO_BP_m4GO:006152 | acetylcholiı1/727  | 7/23843 | 0.194899 | 0.683305 | 0.673083 | Htr2c    |
| GO_BP_m4GO:007126 | L-methioni1/727    | 7/23843 | 0.194899 | 0.683305 | 0.673083 | Bhmt     |
| GO_BP_m4GO:007141 | cellular resı1/727 | 7/23843 | 0.194899 | 0.683305 | 0.673083 | Slc8a1   |
| GO_BP_m4GO:007163 | negative re1/727   | 7/23843 | 0.194899 | 0.683305 | 0.673083 | Socs5    |
| GO_BP_m4GO:007212 | positive reğ1/727  | 7/23843 | 0.194899 | 0.683305 | 0.673083 | C3ar1    |
| GO_BP_m4GO:007231 | clathrin coç1/727  | 7/23843 | 0.194899 | 0.683305 | 0.673083 | Gak      |
| GO_BP_m4GO:008604 | cardiac mu1/727    | 7/23843 | 0.194899 | 0.683305 | 0.673083 | Dsp      |
| GO_BP_m4GO:008606 | cell commı1/727    | 7/23843 | 0.194899 | 0.683305 | 0.673083 | Slc8a1   |
| GO_BP_m4GO:009030 | spindle ass1/727   | 7/23843 | 0.194899 | 0.683305 | 0.673083 | Aurka    |
| GO_BP_m4GO:009033 | positive reğ1/727  | 7/23843 | 0.194899 | 0.683305 | 0.673083 | Mapk14   |
| GO_BP_m4GO:009040 | stress-indu1/727   | 7/23843 | 0.194899 | 0.683305 | 0.673083 | Mapk14   |
| GO_BP_m4GO:009064 | modulatio1/727     | 7/23843 | 0.194899 | 0.683305 | 0.673083 | Ager     |
| GO_BP_m4GO:009704 | dendritic ç1/727   | 7/23843 | 0.194899 | 0.683305 | 0.673083 | Gas6     |
| GO_BP_m4GO:009728 | keratinocyt1/727   | 7/23843 | 0.194899 | 0.683305 | 0.673083 | Zfp3611  |
| GO_BP_m4GO:009770 | connective 1/727   | 7/23843 | 0.194899 | 0.683305 | 0.673083 | Ager     |
| GO_BP_m4GO:190001 | regulation 1/727   | 7/23843 | 0.194899 | 0.683305 | 0.673083 | Ror2     |
| GO_BP_m4GO:190002 | positive reğ1/727  | 7/23843 | 0.194899 | 0.683305 | 0.673083 | Ror2     |

|                                     |           |          |          |          |             |
|-------------------------------------|-----------|----------|----------|----------|-------------|
| GO_BP_m4GO:190185regulation 1/727   | 7/23843   | 0.194899 | 0.683305 | 0.673083 | Pid1        |
| GO_BP_m4GO:190217regulation 1/727   | 7/23843   | 0.194899 | 0.683305 | 0.673083 | Zfp3611     |
| GO_BP_m4GO:190217positive re1/727   | 7/23843   | 0.194899 | 0.683305 | 0.673083 | Sfpq        |
| GO_BP_m4GO:190245negative re1/727   | 7/23843   | 0.194899 | 0.683305 | 0.673083 | Zfp706      |
| GO_BP_m4GO:190302negative re1/727   | 7/23843   | 0.194899 | 0.683305 | 0.673083 | Ddit3       |
| GO_BP_m4GO:190325multi-ciliat1/727  | 7/23843   | 0.194899 | 0.683305 | 0.673083 | Cep152      |
| GO_BP_m4GO:190398positive re1/727   | 7/23843   | 0.194899 | 0.683305 | 0.673083 | Ager        |
| GO_BP_m4GO:190484regulation 1/727   | 7/23843   | 0.194899 | 0.683305 | 0.673083 | Fgf4        |
| GO_BP_m4GO:190505positive re1/727   | 7/23843   | 0.194899 | 0.683305 | 0.673083 | Mapk14      |
| GO_BP_m4GO:190577regulation 1/727   | 7/23843   | 0.194899 | 0.683305 | 0.673083 | Sox17       |
| GO_BP_m4GO:190590regulation 1/727   | 7/23843   | 0.194899 | 0.683305 | 0.673083 | Sox17       |
| GO_BP_m4GO:200013positive re1/727   | 7/23843   | 0.194899 | 0.683305 | 0.673083 | Pim1        |
| GO_BP_m4GO:200051positive re1/727   | 7/23843   | 0.194899 | 0.683305 | 0.673083 | Gas6        |
| GO_BP_m4GO:200054regulation 1/727   | 7/23843   | 0.194899 | 0.683305 | 0.673083 | Fgf4        |
| GO_BP_m4GO:200066regulation 1/727   | 7/23843   | 0.194899 | 0.683305 | 0.673083 | Gas6        |
| GO_BP_m4GO:200104positive re1/727   | 7/23843   | 0.194899 | 0.683305 | 0.673083 | Ripk1       |
| GO_BP_m4GO:000166behavioral 3/727   | 50/23843  | 0.195304 | 0.683305 | 0.673083 | Esr2/Gng7,  |
| GO_BP_m4GO:000602aminoglyc5/727     | 101/23843 | 0.195446 | 0.683305 | 0.673083 | B3gnt5/Ctk  |
| GO_BP_m4GO:004562positive re5/727   | 101/23843 | 0.195446 | 0.683305 | 0.673083 | Btn2a2/Du:  |
| GO_BP_m4GO:007265protein loc 18/727 | 472/23843 | 0.196688 | 0.683305 | 0.673083 | Ager/Arl5a  |
| GO_BP_m4GO:003596response tr6/727   | 128/23843 | 0.196794 | 0.683305 | 0.673083 | Atf6b/Ddit: |
| GO_BP_m4GO:004215lipoprotein 6/727  | 128/23843 | 0.196794 | 0.683305 | 0.673083 | Abhd13/Aq   |
| GO_BP_m4GO:004559regulation 6/727   | 128/23843 | 0.196794 | 0.683305 | 0.673083 | Ddit3/Dusp  |
| GO_BP_m4GO:007122cellular res11/727 | 268/23843 | 0.19746  | 0.683305 | 0.673083 | Abcb4/Ffar  |
| GO_BP_m4GO:000191regulation 2/727   | 27/23843  | 0.198517 | 0.683305 | 0.673083 | Ager/Muc4   |
| GO_BP_m4GO:000692cellular cor 2/727 | 27/23843  | 0.198517 | 0.683305 | 0.673083 | Dnase2b/E   |
| GO_BP_m4GO:000760phototrans 2/727   | 27/23843  | 0.198517 | 0.683305 | 0.673083 | Cabp4/Gna   |
| GO_BP_m4GO:000907aromatic al 2/727  | 27/23843  | 0.198517 | 0.683305 | 0.673083 | Fah/Kynu    |
| GO_BP_m4GO:0009392'-deoxyri 2/727   | 27/23843  | 0.198517 | 0.683305 | 0.673083 | Ak3/Dguok   |
| GO_BP_m4GO:001969deoxyribos 2/727   | 27/23843  | 0.198517 | 0.683305 | 0.673083 | Ak3/Dguok   |
| GO_BP_m4GO:003368osteoblast 2/727   | 27/23843  | 0.198517 | 0.683305 | 0.673083 | Gata1/Tnn   |
| GO_BP_m4GO:003420amyloid-b 2/727    | 27/23843  | 0.198517 | 0.683305 | 0.673083 | Efna1/Tme   |
| GO_BP_m4GO:003598endoderm: 2/727    | 27/23843  | 0.198517 | 0.683305 | 0.673083 | Inhba/Sox1  |
| GO_BP_m4GO:003600positive re 2/727  | 27/23843  | 0.198517 | 0.683305 | 0.673083 | Atf6b/Ddit: |
| GO_BP_m4GO:004303positive re 2/727  | 27/23843  | 0.198517 | 0.683305 | 0.673083 | Ager/Il13   |
| GO_BP_m4GO:004478modulator 2/727    | 27/23843  | 0.198517 | 0.683305 | 0.673083 | Ythdc2/Zfp  |
| GO_BP_m4GO:005506zinc ion ho 2/727  | 27/23843  | 0.198517 | 0.683305 | 0.673083 | Mt1/Slc39a  |
| GO_BP_m4GO:006034trabecula fr 2/727 | 27/23843  | 0.198517 | 0.683305 | 0.673083 | Fhl2/Ovol2  |
| GO_BP_m4GO:006071labyrinthin: 2/727 | 27/23843  | 0.198517 | 0.683305 | 0.673083 | Grb2/Zfp36  |
| GO_BP_m4GO:007023negative re 2/727  | 27/23843  | 0.198517 | 0.683305 | 0.673083 | Efna1/Serp  |
| GO_BP_m4GO:009031positive re 2/727  | 27/23843  | 0.198517 | 0.683305 | 0.673083 | Erbp2/Mtcl  |
| GO_BP_m4GO:190011regulation 2/727   | 27/23843  | 0.198517 | 0.683305 | 0.673083 | Bcl10/Rps3  |
| GO_BP_m4GO:004580positive re 7/727  | 156/23843 | 0.19989  | 0.686546 | 0.676275 | Ager/Gas6,  |
| GO_BP_m4GO:005123establishm: 7/727  | 156/23843 | 0.19989  | 0.686546 | 0.676275 | Parp11/Rbi  |
| GO_BP_m4GO:006040cytosolic c: 7/727 | 156/23843 | 0.19989  | 0.686546 | 0.676275 | Cacna1g/D   |
| GO_BP_m4GO:003253regulation 15/727  | 385/23843 | 0.200226 | 0.687208 | 0.676927 | Akt1s1/Ana  |
| GO_BP_m4GO:004343response tr 12/727 | 298/23843 | 0.201277 | 0.689785 | 0.679466 | Car2/C1qtr  |
| GO_BP_m4GO:000165eye develo 15/727  | 386/23843 | 0.202897 | 0.689785 | 0.679466 | Bfsp2/Cabr  |

|                   |                            |         |           |          |          |          |             |
|-------------------|----------------------------|---------|-----------|----------|----------|----------|-------------|
| GO_BP_m4GO:000995 | response to                | 15/727  | 386/23843 | 0.202897 | 0.689785 | 0.679466 | 5330417C2   |
| GO_BP_m4GO:000220 | behavioral                 | 3/727   | 51/23843  | 0.203163 | 0.689785 | 0.679466 | Esr2/Gng7/  |
| GO_BP_m4GO:000702 | endoplasmic                | 3/727   | 51/23843  | 0.203163 | 0.689785 | 0.679466 | Gak/Lman1   |
| GO_BP_m4GO:000834 | glial cell                 | mi3/727 | 51/23843  | 0.203163 | 0.689785 | 0.679466 | Cspg4/Rtnr  |
| GO_BP_m4GO:003265 | regulation of              | 3/727   | 51/23843  | 0.203163 | 0.689785 | 0.679466 | Ager/Mapk   |
| GO_BP_m4GO:004560 | regulation of              | 3/727   | 51/23843  | 0.203163 | 0.689785 | 0.679466 | Ovol2/Vdr/  |
| GO_BP_m4GO:008600 | cardiac muscle             | 3/727   | 51/23843  | 0.203163 | 0.689785 | 0.679466 | Cacna1g/D   |
| GO_BP_m4GO:200051 | regulation of              | 3/727   | 51/23843  | 0.203163 | 0.689785 | 0.679466 | Ager/Il27/5 |
| GO_BP_m4GO:000661 | protein tyrosine           | 5/727   | 103/23843 | 0.20618  | 0.689785 | 0.679466 | Erbp2/Folr  |
| GO_BP_m4GO:003241 | negative regulation of     | 4/727   | 77/23843  | 0.208096 | 0.689785 | 0.679466 | Cbarp/Kcne  |
| GO_BP_m4GO:005170 | interaction                | 4/727   | 77/23843  | 0.208096 | 0.689785 | 0.679466 | Mbl1/Mbl2   |
| GO_BP_m4GO:003582 | modification               | 7/727   | 158/23843 | 0.208489 | 0.689785 | 0.679466 | AY761184/   |
| GO_BP_m4GO:003166 | response to                | 14/727  | 359/23843 | 0.209359 | 0.689785 | 0.679466 | 5330417C2   |
| GO_BP_m4GO:007190 | regulation of              | 16/727  | 418/23843 | 0.209598 | 0.689785 | 0.679466 | Ager/Cspg   |
| GO_BP_m4GO:000030 | response to                | 2/727   | 28/23843  | 0.209744 | 0.689785 | 0.679466 | Apoa4/Mp    |
| GO_BP_m4GO:000717 | regulation of              | 2/727   | 28/23843  | 0.209744 | 0.689785 | 0.679466 | Neurl1a/Sc  |
| GO_BP_m4GO:001075 | regulation of              | 2/727   | 28/23843  | 0.209744 | 0.689785 | 0.679466 | C3ar1/Map   |
| GO_BP_m4GO:003319 | response to                | 2/727   | 28/23843  | 0.209744 | 0.689785 | 0.679466 | Sell/Slc8a1 |
| GO_BP_m4GO:003516 | embryonic                  | 2/727   | 28/23843  | 0.209744 | 0.689785 | 0.679466 | Gata1/Tho   |
| GO_BP_m4GO:004574 | positive regulation of     | 2/727   | 28/23843  | 0.209744 | 0.689785 | 0.679466 | Esr2/Neurl  |
| GO_BP_m4GO:004882 | hair follicle              | 2/727   | 28/23843  | 0.209744 | 0.689785 | 0.679466 | Cdh3/Mre    |
| GO_BP_m4GO:006021 | hematopoiesis              | 2/727   | 28/23843  | 0.209744 | 0.689785 | 0.679466 | Mir155/Mir  |
| GO_BP_m4GO:190217 | regulation of              | 2/727   | 28/23843  | 0.209744 | 0.689785 | 0.679466 | Nme5/Sfpc   |
| GO_BP_m4GO:199074 | cellular det               | 2/727   | 28/23843  | 0.209744 | 0.689785 | 0.679466 | Apoa4/Mp    |
| GO_BP_m4GO:007162 | regulation of              | 3/727   | 52/23843  | 0.211094 | 0.689785 | 0.679466 | C3ar1/Map   |
| GO_BP_m4GO:007252 | pyrimidine                 | 3/727   | 52/23843  | 0.211094 | 0.689785 | 0.679466 | Ak3/Nme5    |
| GO_BP_m4GO:007257 | endothelial                | 3/727   | 52/23843  | 0.211094 | 0.689785 | 0.679466 | Ager/Gas6   |
| GO_BP_m4GO:004390 | regulation of              | 9/727   | 215/23843 | 0.211544 | 0.689785 | 0.679466 | A230050P2   |
| GO_BP_m4GO:003000 | cellular motility          | 5/727   | 104/23843 | 0.211618 | 0.689785 | 0.679466 | Atp1b4/Ca   |
| GO_BP_m4GO:005129 | protein heterodimerization | 7/727   | 159/23843 | 0.212841 | 0.689785 | 0.679466 | Bcl10/Ctnn  |
| GO_BP_m4GO:006004 | retina development         | 7/727   | 159/23843 | 0.212841 | 0.689785 | 0.679466 | Cabp4/Gna   |
| GO_BP_m4GO:190165 | response to                | 7/727   | 159/23843 | 0.212841 | 0.689785 | 0.679466 | Abcb4/Cac   |
| GO_BP_m4GO:005134 | negative regulation of     | 11/727  | 273/23843 | 0.213674 | 0.689785 | 0.679466 | Akt1s1/Dus  |
| GO_BP_m4GO:000663 | acyl-CoA synthesis         | 4/727   | 78/23843  | 0.214495 | 0.689785 | 0.679466 | Kynu/Nudt   |
| GO_BP_m4GO:001403 | neural crest               | 4/727   | 78/23843  | 0.214495 | 0.689785 | 0.679466 | Folr1/Ovol  |
| GO_BP_m4GO:003538 | thioester synthesis        | 4/727   | 78/23843  | 0.214495 | 0.689785 | 0.679466 | Kynu/Nudt   |
| GO_BP_m4GO:001593 | nucleobase synthesis       | 8/727   | 188/23843 | 0.21679  | 0.689785 | 0.679466 | Parp11/Rbi  |
| GO_BP_m4GO:004273 | exogenous                  | 3/727   | 53/23843  | 0.219091 | 0.689785 | 0.679466 | Cyp1a2/Cy   |
| GO_BP_m4GO:006138 | trabecular network         | 3/727   | 53/23843  | 0.219091 | 0.689785 | 0.679466 | Fhl2/Nfatc  |
| GO_BP_m4GO:190101 | regulation of              | 3/727   | 53/23843  | 0.219091 | 0.689785 | 0.679466 | Ager/Kcne   |
| GO_BP_m4GO:000182 | inner cell nuclear         | 1/727   | 8/23843   | 0.219454 | 0.689785 | 0.679466 | Sox17       |
| GO_BP_m4GO:000224 | wound healing              | 1/727   | 8/23843   | 0.219454 | 0.689785 | 0.679466 | Ager        |
| GO_BP_m4GO:000634 | chromatin                  | 1/727   | 8/23843   | 0.219454 | 0.689785 | 0.679466 | Dydc1       |
| GO_BP_m4GO:000636 | transcription              | 1/727   | 8/23843   | 0.219454 | 0.689785 | 0.679466 | Polr1e      |
| GO_BP_m4GO:000714 | female meiosis             | 1/727   | 8/23843   | 0.219454 | 0.689785 | 0.679466 | Aurka       |
| GO_BP_m4GO:000740 | negative regulation of     | 1/727   | 8/23843   | 0.219454 | 0.689785 | 0.679466 | Ctnna1      |
| GO_BP_m4GO:000913 | nucleoside                 | 1/727   | 8/23843   | 0.219454 | 0.689785 | 0.679466 | Ak3         |
| GO_BP_m4GO:000919 | ribonucleoside             | 1/727   | 8/23843   | 0.219454 | 0.689785 | 0.679466 | Nudt5       |

|                                    |         |          |          |          |          |
|------------------------------------|---------|----------|----------|----------|----------|
| GO_BP_m4GO:000931oligosacch:1/727  | 8/23843 | 0.219454 | 0.689785 | 0.679466 | Ctbs     |
| GO_BP_m4GO:000999negative re1/727  | 8/23843 | 0.219454 | 0.689785 | 0.679466 | Sox17    |
| GO_BP_m4GO:001045positive re1/727  | 8/23843 | 0.219454 | 0.689785 | 0.679466 | Nkx6-2   |
| GO_BP_m4GO:001060regulation 1/727  | 8/23843 | 0.219454 | 0.689785 | 0.679466 | Cnot6    |
| GO_BP_m4GO:001079regulation 1/727  | 8/23843 | 0.219454 | 0.689785 | 0.679466 | Thoc5    |
| GO_BP_m4GO:001088regulation 1/727  | 8/23843 | 0.219454 | 0.689785 | 0.679466 | Slc8a1   |
| GO_BP_m4GO:001094negative re1/727  | 8/23843 | 0.219454 | 0.689785 | 0.679466 | Ovol2    |
| GO_BP_m4GO:001587acetylcholin1/727 | 8/23843 | 0.219454 | 0.689785 | 0.679466 | Htr2c    |
| GO_BP_m4GO:001591plasma me1/727    | 8/23843 | 0.219454 | 0.689785 | 0.679466 | Irs2     |
| GO_BP_m4GO:001658nucleosom1/727    | 8/23843 | 0.219454 | 0.689785 | 0.679466 | Smarca5  |
| GO_BP_m4GO:001980peptide crc1/727  | 8/23843 | 0.219454 | 0.689785 | 0.679466 | Spock3   |
| GO_BP_m4GO:001991peptidyl-ar1/727  | 8/23843 | 0.219454 | 0.689785 | 0.679466 | Prmt9    |
| GO_BP_m4GO:002154corpus call1/727  | 8/23843 | 0.219454 | 0.689785 | 0.679466 | Zeb2     |
| GO_BP_m4GO:002303CD40 sign1/727    | 8/23843 | 0.219454 | 0.689785 | 0.679466 | Fanca    |
| GO_BP_m4GO:003024skeletal mu1/727  | 8/23843 | 0.219454 | 0.689785 | 0.679466 | Myom2    |
| GO_BP_m4GO:003030regulation 1/727  | 8/23843 | 0.219454 | 0.689785 | 0.679466 | Apoa4    |
| GO_BP_m4GO:003108nuclear-tra1/727  | 8/23843 | 0.219454 | 0.689785 | 0.679466 | Zfp3611  |
| GO_BP_m4GO:003144negative re1/727  | 8/23843 | 0.219454 | 0.689785 | 0.679466 | Nelfe    |
| GO_BP_m4GO:003165positive re1/727  | 8/23843 | 0.219454 | 0.689785 | 0.679466 | Pim1     |
| GO_BP_m4GO:003290transformir1/727  | 8/23843 | 0.219454 | 0.689785 | 0.679466 | Cdh3     |
| GO_BP_m4GO:003290regulation 1/727  | 8/23843 | 0.219454 | 0.689785 | 0.679466 | Cdh3     |
| GO_BP_m4GO:003315immunoglc1/727    | 8/23843 | 0.219454 | 0.689785 | 0.679466 | Polb     |
| GO_BP_m4GO:003649regulation 1/727  | 8/23843 | 0.219454 | 0.689785 | 0.679466 | Ppp1r15b |
| GO_BP_m4GO:003804dimeric G- 1/727  | 8/23843 | 0.219454 | 0.689785 | 0.679466 | Grm1     |
| GO_BP_m4GO:004263catagen 1/727     | 8/23843 | 0.219454 | 0.689785 | 0.679466 | Cdh3     |
| GO_BP_m4GO:004369dedifferent1/727  | 8/23843 | 0.219454 | 0.689785 | 0.679466 | Fezf1    |
| GO_BP_m4GO:004369cell dediffe1/727 | 8/23843 | 0.219454 | 0.689785 | 0.679466 | Fezf1    |
| GO_BP_m4GO:004438negative re1/727  | 8/23843 | 0.219454 | 0.689785 | 0.679466 | Dusp10   |
| GO_BP_m4GO:004441translocatic1/727 | 8/23843 | 0.219454 | 0.689785 | 0.679466 | Thoc5    |
| GO_BP_m4GO:004482positive re1/727  | 8/23843 | 0.219454 | 0.689785 | 0.679466 | Ythdc2   |
| GO_BP_m4GO:004508positive re1/727  | 8/23843 | 0.219454 | 0.689785 | 0.679466 | Rela     |
| GO_BP_m4GO:004541positive re1/727  | 8/23843 | 0.219454 | 0.689785 | 0.679466 | Bcl10    |
| GO_BP_m4GO:004562positive re1/727  | 8/23843 | 0.219454 | 0.689785 | 0.679466 | Socs5    |
| GO_BP_m4GO:004606dATP meta1/727    | 8/23843 | 0.219454 | 0.689785 | 0.679466 | Ak3      |
| GO_BP_m4GO:004688regulation 1/727  | 8/23843 | 0.219454 | 0.689785 | 0.679466 | Inhba    |
| GO_BP_m4GO:004808positive re1/727  | 8/23843 | 0.219454 | 0.689785 | 0.679466 | Zeb2     |
| GO_BP_m4GO:005177response tr1/727  | 8/23843 | 0.219454 | 0.689785 | 0.679466 | Vasn     |
| GO_BP_m4GO:005183translocatic1/727 | 8/23843 | 0.219454 | 0.689785 | 0.679466 | Thoc5    |
| GO_BP_m4GO:006004retinal bipc1/727 | 8/23843 | 0.219454 | 0.689785 | 0.679466 | Cabp4    |
| GO_BP_m4GO:006036cranial sutu1/727 | 8/23843 | 0.219454 | 0.689785 | 0.679466 | Fgf4     |
| GO_BP_m4GO:006037regulation 1/727  | 8/23843 | 0.219454 | 0.689785 | 0.679466 | Cacna1g  |
| GO_BP_m4GO:006100negative re1/727  | 8/23843 | 0.219454 | 0.689785 | 0.679466 | Efna1    |
| GO_BP_m4GO:006162pharyngeal1/727   | 8/23843 | 0.219454 | 0.689785 | 0.679466 | Folr1    |
| GO_BP_m4GO:006168detoxificati1/727 | 8/23843 | 0.219454 | 0.689785 | 0.679466 | Mt1      |
| GO_BP_m4GO:006173mitochond1/727    | 8/23843 | 0.219454 | 0.689785 | 0.679466 | Pdhx     |
| GO_BP_m4GO:007012tRNA amin1/727    | 8/23843 | 0.219454 | 0.689785 | 0.679466 | Ears2    |
| GO_BP_m4GO:007126L-methioni1/727   | 8/23843 | 0.219454 | 0.689785 | 0.679466 | Bhmt     |
| GO_BP_m4GO:007149cellular res1/727 | 8/23843 | 0.219454 | 0.689785 | 0.679466 | Mme      |

|                                      |           |          |          |          |            |
|--------------------------------------|-----------|----------|----------|----------|------------|
| GO_BP_m4GO:007157zinc ion im 1/727   | 8/23843   | 0.219454 | 0.689785 | 0.679466 | Slc39a8    |
| GO_BP_m4GO:007231vesicle unc 1/727   | 8/23843   | 0.219454 | 0.689785 | 0.679466 | Gak        |
| GO_BP_m4GO:007261interleukin· 1/727  | 8/23843   | 0.219454 | 0.689785 | 0.679466 | Mapk14     |
| GO_BP_m4GO:009016Golgi to lys 1/727  | 8/23843   | 0.219454 | 0.689785 | 0.679466 | Gak        |
| GO_BP_m4GO:009737interneuror 1/727   | 8/23843   | 0.219454 | 0.689785 | 0.679466 | Mir200c    |
| GO_BP_m4GO:009756stress resp 1/727   | 8/23843   | 0.219454 | 0.689785 | 0.679466 | Mt1        |
| GO_BP_m4GO:009876neurotrans 1/727    | 8/23843   | 0.219454 | 0.689785 | 0.679466 | Slc17a8    |
| GO_BP_m4GO:190004regulation 1/727    | 8/23843   | 0.219454 | 0.689785 | 0.679466 | Trip12     |
| GO_BP_m4GO:190027negative re 1/727   | 8/23843   | 0.219454 | 0.689785 | 0.679466 | Ager       |
| GO_BP_m4GO:190036negative re 1/727   | 8/23843   | 0.219454 | 0.689785 | 0.679466 | Nelfe      |
| GO_BP_m4GO:190137acetate est 1/727   | 8/23843   | 0.219454 | 0.689785 | 0.679466 | Htr2c      |
| GO_BP_m4GO:190206fatty acid tr 1/727 | 8/23843   | 0.219454 | 0.689785 | 0.679466 | Irs2       |
| GO_BP_m4GO:190241positive re 1/727   | 8/23843   | 0.219454 | 0.689785 | 0.679466 | Eif3e      |
| GO_BP_m4GO:190295regulation 1/727    | 8/23843   | 0.219454 | 0.689785 | 0.679466 | Efna1      |
| GO_BP_m4GO:190372negative re 1/727   | 8/23843   | 0.219454 | 0.689785 | 0.679466 | Pik3ip1    |
| GO_BP_m4GO:190524regulation 1/727    | 8/23843   | 0.219454 | 0.689785 | 0.679466 | Tiam1      |
| GO_BP_m4GO:190524regulation 1/727    | 8/23843   | 0.219454 | 0.689785 | 0.679466 | Efna1      |
| GO_BP_m4GO:200017regulation 1/727    | 8/23843   | 0.219454 | 0.689785 | 0.679466 | Rtn4       |
| GO_BP_m4GO:200019negative re 1/727   | 8/23843   | 0.219454 | 0.689785 | 0.679466 | Irs2       |
| GO_BP_m4GO:200054negative re 1/727   | 8/23843   | 0.219454 | 0.689785 | 0.679466 | Sox17      |
| GO_BP_m4GO:200064positive re 1/727   | 8/23843   | 0.219454 | 0.689785 | 0.679466 | Ptpn23     |
| GO_BP_m4GO:200113regulation 1/727    | 8/23843   | 0.219454 | 0.689785 | 0.679466 | Abcb4      |
| GO_BP_m4GO:200114positive re 1/727   | 8/23843   | 0.219454 | 0.689785 | 0.679466 | Abcb4      |
| GO_BP_m4GO:001923sensory pe 6/727    | 133/23843 | 0.22079  | 0.689785 | 0.679466 | Cacna1b/G  |
| GO_BP_m4GO:000646RNA localiz 8/727   | 189/23843 | 0.220842 | 0.689785 | 0.679466 | Mthfsd/Par |
| GO_BP_m4GO:007186cellular pot 8/727  | 189/23843 | 0.220842 | 0.689785 | 0.679466 | Ager/Atp1f |
| GO_BP_m4GO:007186potassium 8/727     | 189/23843 | 0.220842 | 0.689785 | 0.679466 | Ager/Atp1f |
| GO_BP_m4GO:004416cellular am 4/727   | 79/23843  | 0.220948 | 0.689785 | 0.679466 | Abhd4/Gd1  |
| GO_BP_m4GO:190403regulation 4/727    | 79/23843  | 0.220948 | 0.689785 | 0.679466 | Ager/Gas6  |
| GO_BP_m4GO:000177microglial c 2/727  | 29/23843  | 0.221031 | 0.689785 | 0.679466 | Ager/Il13  |
| GO_BP_m4GO:000826bile acid m 2/727   | 29/23843  | 0.221031 | 0.689785 | 0.679466 | Akr1d1/Cy1 |
| GO_BP_m4GO:003111positive re 2/727   | 29/23843  | 0.221031 | 0.689785 | 0.679466 | Nav3/Rps3  |
| GO_BP_m4GO:003306positive re 2/727   | 29/23843  | 0.221031 | 0.689785 | 0.679466 | Il13/Vamp6 |
| GO_BP_m4GO:004336positive re 2/727   | 29/23843  | 0.221031 | 0.689785 | 0.679466 | Il13/Vamp6 |
| GO_BP_m4GO:005126establishm 2/727    | 29/23843  | 0.221031 | 0.689785 | 0.679466 | Spdl1/Spry |
| GO_BP_m4GO:006036regulation 2/727    | 29/23843  | 0.221031 | 0.689785 | 0.679466 | Kcne1/Ned  |
| GO_BP_m4GO:006031cardiac epi 2/727   | 29/23843  | 0.221031 | 0.689785 | 0.679466 | Efna1/Rtn4 |
| GO_BP_m4GO:007036lens fiber c 2/727  | 29/23843  | 0.221031 | 0.689785 | 0.679466 | Bfsp2/Zeb2 |
| GO_BP_m4GO:009002positive re 2/727   | 29/23843  | 0.221031 | 0.689785 | 0.679466 | C3ar1/Sell |
| GO_BP_m4GO:009735autophago 2/727     | 29/23843  | 0.221031 | 0.689785 | 0.679466 | Stx17/Vam  |
| GO_BP_m4GO:190018negative re 2/727   | 29/23843  | 0.221031 | 0.689785 | 0.679466 | Dclk3/Gas6 |
| GO_BP_m4GO:006102membrane 9/727      | 218/23843 | 0.222803 | 0.694862 | 0.684466 | Chchd6/Ga  |
| GO_BP_m4GO:190136organic cyc 18/727  | 483/23843 | 0.223629 | 0.696538 | 0.686118 | Akr1d1/Ao  |
| GO_BP_m4GO:003016regulation 10/727   | 247/23843 | 0.223632 | 0.696538 | 0.686118 | Ager/Ehd4  |
| GO_BP_m4GO:001401regulation 6/727    | 134/23843 | 0.225703 | 0.699878 | 0.689408 | Ager/Dusp  |
| GO_BP_m4GO:000916nucleotide 12/727   | 306/23843 | 0.226302 | 0.699878 | 0.689408 | Ak3/Atp5c  |
| GO_BP_m4GO:003261interleukin· 3/727  | 54/23843  | 0.227149 | 0.699878 | 0.689408 | Ager/Mapk  |
| GO_BP_m4GO:004256fear respor 3/727   | 54/23843  | 0.227149 | 0.699878 | 0.689408 | Esr2/Gng7  |



|                   |                |        |           |          |          |          |             |
|-------------------|----------------|--------|-----------|----------|----------|----------|-------------|
| GO_BP_m4GO:190390 | positive re    | 3/727  | 54/23843  | 0.227149 | 0.699878 | 0.689408 | Ppid/Ythdc  |
| GO_BP_m4GO:003505 | embryonic      | 4/727  | 80/23843  | 0.227451 | 0.699878 | 0.689408 | Folr1/Ovol1 |
| GO_BP_m4GO:000007 | DNA dama       | 5/727  | 107/23843 | 0.2282   | 0.699878 | 0.689408 | Hus1/Mapk1  |
| GO_BP_m4GO:000641 | translation    | 5/727  | 107/23843 | 0.2282   | 0.699878 | 0.689408 | Eif3a/Eif3e |
| GO_BP_m4GO:001907 | viral genon    | 5/727  | 107/23843 | 0.2282   | 0.699878 | 0.689408 | A230050P2   |
| GO_BP_m4GO:001905 | viral life cyc | 8/727  | 191/23843 | 0.229029 | 0.699878 | 0.689408 | A230050P2   |
| GO_BP_m4GO:200123 | regulation     | 15/727 | 396/23843 | 0.230483 | 0.699878 | 0.689408 | Bcl10/Ctnn  |
| GO_BP_m4GO:001648 | cytosolic tr   | 6/727  | 135/23843 | 0.230652 | 0.699878 | 0.689408 | Bet1l/Gak1  |
| GO_BP_m4GO:005092 | positive re    | 6/727  | 135/23843 | 0.230652 | 0.699878 | 0.689408 | Ager/C3ar1  |
| GO_BP_m4GO:007205 | stem cell p    | 6/727  | 135/23843 | 0.230652 | 0.699878 | 0.689408 | Ctnna1/Nfya |
| GO_BP_m4GO:190406 | positive re    | 6/727  | 135/23843 | 0.230652 | 0.699878 | 0.689408 | Ager/ArcC   |
| GO_BP_m4GO:003459 | cellular res   | 10/727 | 249/23843 | 0.230794 | 0.699878 | 0.689408 | Agap3/Apc   |
| GO_BP_m4GO:000290 | regulation     | 2/727  | 30/23843  | 0.232366 | 0.699878 | 0.689408 | Bcl10/Irs2  |
| GO_BP_m4GO:000622 | pyrimidine     | 2/727  | 30/23843  | 0.232366 | 0.699878 | 0.689408 | Ak3/Nme5    |
| GO_BP_m4GO:001400 | astrocyte d    | 2/727  | 30/23843  | 0.232366 | 0.699878 | 0.689408 | Ager/Ror2   |
| GO_BP_m4GO:004603 | GTP metab      | 2/727  | 30/23843  | 0.232366 | 0.699878 | 0.689408 | Ak3/Nme5    |
| GO_BP_m4GO:004801 | neurotrop      | 2/727  | 30/23843  | 0.232366 | 0.699878 | 0.689408 | Akt1s1/Spr  |
| GO_BP_m4GO:004867 | regulation     | 2/727  | 30/23843  | 0.232366 | 0.699878 | 0.689408 | Rtn4/Rtn4r  |
| GO_BP_m4GO:005507 | potassium      | 2/727  | 30/23843  | 0.232366 | 0.699878 | 0.689408 | Atp1b4/Kctd |
| GO_BP_m4GO:006058 | apoptotic r    | 2/727  | 30/23843  | 0.232366 | 0.699878 | 0.689408 | Fgf4/Vdr    |
| GO_BP_m4GO:190007 | positive re    | 2/727  | 30/23843  | 0.232366 | 0.699878 | 0.689408 | C1qtnf12/F  |
| GO_BP_m4GO:190552 | regulation     | 2/727  | 30/23843  | 0.232366 | 0.699878 | 0.689408 | C3ar1/Map   |
| GO_BP_m4GO:000698 | response tr    | 5/727  | 108/23843 | 0.23381  | 0.699878 | 0.689408 | Atf6b/Ddit3 |
| GO_BP_m4GO:003011 | regulation     | 11/727 | 279/23843 | 0.23383  | 0.699878 | 0.689408 | Ddit3/Folr1 |
| GO_BP_m4GO:190406 | negative re    | 4/727  | 81/23843  | 0.234002 | 0.699878 | 0.689408 | Cbarp/Kcnc  |
| GO_BP_m4GO:000648 | negative re    | 9/727  | 221/23843 | 0.234285 | 0.699878 | 0.689408 | Akt1s1/Dus  |
| GO_BP_m4GO:003505 | cardiocyte     | 7/727  | 164/23843 | 0.235078 | 0.699878 | 0.689408 | Fhl2/Folr1/ |
| GO_BP_m4GO:000628 | nucleotide     | 3/727  | 55/23843  | 0.235263 | 0.699878 | 0.689408 | Hus1/Polk/  |
| GO_BP_m4GO:004269 | ovulation c    | 3/727  | 55/23843  | 0.235263 | 0.699878 | 0.689408 | Erbp2/Esr2  |
| GO_BP_m4GO:004362 | regulation     | 3/727  | 55/23843  | 0.235263 | 0.699878 | 0.689408 | Atf6b/Ddit3 |
| GO_BP_m4GO:008600 | cardiac mu     | 3/727  | 55/23843  | 0.235263 | 0.699878 | 0.689408 | Cacna1g/D   |
| GO_BP_m4GO:003563 | multicellul    | 6/727  | 136/23843 | 0.235634 | 0.699878 | 0.689408 | Cacna1g/C   |
| GO_BP_m4GO:001810 | peptidyl-ty    | 12/727 | 310/23843 | 0.239267 | 0.699878 | 0.689408 | Cspg4/Efn   |
| GO_BP_m4GO:000018 | activation c   | 5/727  | 109/23843 | 0.239459 | 0.699878 | 0.689408 | Cspg4/Ern   |
| GO_BP_m4GO:000693 | smooth mt      | 5/727  | 109/23843 | 0.239459 | 0.699878 | 0.689408 | Cacna1g/H   |
| GO_BP_m4GO:000995 | dorsal/vent    | 5/727  | 109/23843 | 0.239459 | 0.699878 | 0.689408 | Ddit3/Nkx6  |
| GO_BP_m4GO:003812 | ERBB signa     | 5/727  | 109/23843 | 0.239459 | 0.699878 | 0.689408 | Esr2/Kif16b |
| GO_BP_m4GO:004407 | regulation     | 5/727  | 109/23843 | 0.239459 | 0.699878 | 0.689408 | Abcb4/Car   |
| GO_BP_m4GO:000941 | response tr    | 11/727 | 281/23843 | 0.240707 | 0.699878 | 0.689408 | Agap3/Cak   |
| GO_BP_m4GO:000018 | chromatin      | 1/727  | 9/23843   | 0.243262 | 0.699878 | 0.689408 | Smarca5     |
| GO_BP_m4GO:000171 | endoderm       | 1/727  | 9/23843   | 0.243262 | 0.699878 | 0.689408 | Sox17       |
| GO_BP_m4GO:000184 | neural fold    | 1/727  | 9/23843   | 0.243262 | 0.699878 | 0.689408 | Ovol2       |
| GO_BP_m4GO:000274 | positive re    | 1/727  | 9/23843   | 0.243262 | 0.699878 | 0.689408 | Mapk14      |
| GO_BP_m4GO:000322 | ventricular    | 1/727  | 9/23843   | 0.243262 | 0.699878 | 0.689408 | Dsp         |
| GO_BP_m4GO:000622 | UTP biosyn     | 1/727  | 9/23843   | 0.243262 | 0.699878 | 0.689408 | Nme5        |
| GO_BP_m4GO:000655 | L-phenylal     | 1/727  | 9/23843   | 0.243262 | 0.699878 | 0.689408 | Fah         |
| GO_BP_m4GO:000699 | response tr    | 1/727  | 9/23843   | 0.243262 | 0.699878 | 0.689408 | Npc1l1      |
| GO_BP_m4GO:000721 | serotonin r    | 1/727  | 9/23843   | 0.243262 | 0.699878 | 0.689408 | Htr2c       |

|                                                             |         |          |          |          |         |
|-------------------------------------------------------------|---------|----------|----------|----------|---------|
| GO_BP_m4GO:000734egg activation 1/727                       | 9/23843 | 0.243262 | 0.699878 | 0.689408 | Astl    |
| GO_BP_m4GO:000834adult feeding 1/727                        | 9/23843 | 0.243262 | 0.699878 | 0.689408 | Dmbx1   |
| GO_BP_m4GO:000913nucleoside 1/727                           | 9/23843 | 0.243262 | 0.699878 | 0.689408 | Nudt5   |
| GO_BP_m4GO:001087positive regulation 1/727                  | 9/23843 | 0.243262 | 0.699878 | 0.689408 | Apoa4   |
| GO_BP_m4GO:001486skeletal myofibrillogenesis 1/727          | 9/23843 | 0.243262 | 0.699878 | 0.689408 | Myom2   |
| GO_BP_m4GO:001579polyol transport 1/727                     | 9/23843 | 0.243262 | 0.699878 | 0.689408 | Aqp9    |
| GO_BP_m4GO:001582proline transport 1/727                    | 9/23843 | 0.243262 | 0.699878 | 0.689408 | Slc1a4  |
| GO_BP_m4GO:001802peptidyl-lysine catabolic process 1/727    | 9/23843 | 0.243262 | 0.699878 | 0.689408 | Smyd2   |
| GO_BP_m4GO:002195corticospinal tract myelination 1/727      | 9/23843 | 0.243262 | 0.699878 | 0.689408 | Zeb2    |
| GO_BP_m4GO:003030poly-N-acetylation 1/727                   | 9/23843 | 0.243262 | 0.699878 | 0.689408 | B3gnt5  |
| GO_BP_m4GO:003031poly-N-acetylation 1/727                   | 9/23843 | 0.243262 | 0.699878 | 0.689408 | B3gnt5  |
| GO_BP_m4GO:003165regulation of cell cycle 1/727             | 9/23843 | 0.243262 | 0.699878 | 0.689408 | Pim1    |
| GO_BP_m4GO:003200positive regulation of cell cycle 1/727    | 9/23843 | 0.243262 | 0.699878 | 0.689408 | Irs2    |
| GO_BP_m4GO:003207regulation of cell cycle 1/727             | 9/23843 | 0.243262 | 0.699878 | 0.689408 | Rps3    |
| GO_BP_m4GO:003232alanine transport 1/727                    | 9/23843 | 0.243262 | 0.699878 | 0.689408 | Slc1a4  |
| GO_BP_m4GO:003290transforming growth factor signaling 1/727 | 9/23843 | 0.243262 | 0.699878 | 0.689408 | Lum     |
| GO_BP_m4GO:003290regulation of cell cycle 1/727             | 9/23843 | 0.243262 | 0.699878 | 0.689408 | Lum     |
| GO_BP_m4GO:003331mitotic DNA replication 1/727              | 9/23843 | 0.243262 | 0.699878 | 0.689408 | Hus1    |
| GO_BP_m4GO:003360positive regulation of cell cycle 1/727    | 9/23843 | 0.243262 | 0.699878 | 0.689408 | Rtn4    |
| GO_BP_m4GO:003368nucleotide metabolic process 1/727         | 9/23843 | 0.243262 | 0.699878 | 0.689408 | Xpa     |
| GO_BP_m4GO:003368negative regulation of cell cycle 1/727    | 9/23843 | 0.243262 | 0.699878 | 0.689408 | Tnn     |
| GO_BP_m4GO:003435negative regulation of cell cycle 1/727    | 9/23843 | 0.243262 | 0.699878 | 0.689408 | Gas6    |
| GO_BP_m4GO:003509behavioral homeostasis 1/727               | 9/23843 | 0.243262 | 0.699878 | 0.689408 | Htr2c   |
| GO_BP_m4GO:004211endothelial cell morphogenesis 1/727       | 9/23843 | 0.243262 | 0.699878 | 0.689408 | Socs5   |
| GO_BP_m4GO:004236vitamin D receptor signaling 1/727         | 9/23843 | 0.243262 | 0.699878 | 0.689408 | Vdr     |
| GO_BP_m4GO:004547response to hypoxia 1/727                  | 9/23843 | 0.243262 | 0.699878 | 0.689408 | Abcb4   |
| GO_BP_m4GO:004558regulation of cell cycle 1/727             | 9/23843 | 0.243262 | 0.699878 | 0.689408 | Lck     |
| GO_BP_m4GO:004561negative regulation of cell cycle 1/727    | 9/23843 | 0.243262 | 0.699878 | 0.689408 | Ovol2   |
| GO_BP_m4GO:004611nucleobase metabolic process 1/727         | 9/23843 | 0.243262 | 0.699878 | 0.689408 | Aox3    |
| GO_BP_m4GO:004664regulation of cell cycle 1/727             | 9/23843 | 0.243262 | 0.699878 | 0.689408 | Lck     |
| GO_BP_m4GO:004881regulation of cell cycle 1/727             | 9/23843 | 0.243262 | 0.699878 | 0.689408 | Cdh3    |
| GO_BP_m4GO:005071negative regulation of cell cycle 1/727    | 9/23843 | 0.243262 | 0.699878 | 0.689408 | Gas6    |
| GO_BP_m4GO:005093regulation of cell cycle 1/727             | 9/23843 | 0.243262 | 0.699878 | 0.689408 | Zeb2    |
| GO_BP_m4GO:005102chiasma assembly 1/727                     | 9/23843 | 0.243262 | 0.699878 | 0.689408 | Brip1   |
| GO_BP_m4GO:005140response to hypoxia 1/727                  | 9/23843 | 0.243262 | 0.699878 | 0.689408 | Ddit3   |
| GO_BP_m4GO:006058regulation of cell cycle 1/727             | 9/23843 | 0.243262 | 0.699878 | 0.689408 | Vdr     |
| GO_BP_m4GO:006083blood vessel morphogenesis 1/727           | 9/23843 | 0.243262 | 0.699878 | 0.689408 | Ccm2    |
| GO_BP_m4GO:006130cornea development 1/727                   | 9/23843 | 0.243262 | 0.699878 | 0.689408 | Kera    |
| GO_BP_m4GO:007018kynurenine metabolic process 1/727         | 9/23843 | 0.243262 | 0.699878 | 0.689408 | Kynu    |
| GO_BP_m4GO:007047positive regulation of cell cycle 1/727    | 9/23843 | 0.243262 | 0.699878 | 0.689408 | Lck     |
| GO_BP_m4GO:007098oxidative DNA damage 1/727                 | 9/23843 | 0.243262 | 0.699878 | 0.689408 | Cyp1a2  |
| GO_BP_m4GO:007137cellular respiration 1/727                 | 9/23843 | 0.243262 | 0.699878 | 0.689408 | Inhba   |
| GO_BP_m4GO:007150cellular respiration 1/727                 | 9/23843 | 0.243262 | 0.699878 | 0.689408 | Npc1l1  |
| GO_BP_m4GO:008601SA node cell cycle 1/727                   | 9/23843 | 0.243262 | 0.699878 | 0.689408 | Cacna1g |
| GO_BP_m4GO:008601SA node cell cycle 1/727                   | 9/23843 | 0.243262 | 0.699878 | 0.689408 | Cacna1g |
| GO_BP_m4GO:008603regulation of cell cycle 1/727             | 9/23843 | 0.243262 | 0.699878 | 0.689408 | Slc8a1  |
| GO_BP_m4GO:008607SA node cell cycle 1/727                   | 9/23843 | 0.243262 | 0.699878 | 0.689408 | Cacna1g |
| GO_BP_m4GO:009706cellular respiration 1/727                 | 9/23843 | 0.243262 | 0.699878 | 0.689408 | Gata1   |

|                                     |           |          |          |          |             |
|-------------------------------------|-----------|----------|----------|----------|-------------|
| GO_BP_m4GO:009866G-protein c1/727   | 9/23843   | 0.243262 | 0.699878 | 0.689408 | Htr2c       |
| GO_BP_m4GO:009877positive re1/727   | 9/23843   | 0.243262 | 0.699878 | 0.689408 | Tomm7       |
| GO_BP_m4GO:009881spontaneo1/727     | 9/23843   | 0.243262 | 0.699878 | 0.689408 | Ager        |
| GO_BP_m4GO:19001Cnegative re1/727   | 9/23843   | 0.243262 | 0.699878 | 0.689408 | Atf6b       |
| GO_BP_m4GO:19001fnegative re1/727   | 9/23843   | 0.243262 | 0.699878 | 0.689408 | Gas6        |
| GO_BP_m4GO:190103positive re1/727   | 9/23843   | 0.243262 | 0.699878 | 0.689408 | Ripk1       |
| GO_BP_m4GO:190152positive re1/727   | 9/23843   | 0.243262 | 0.699878 | 0.689408 | Tomm7       |
| GO_BP_m4GO:190172positive re1/727   | 9/23843   | 0.243262 | 0.699878 | 0.689408 | C3ar1       |
| GO_BP_m4GO:190203regulation 1/727   | 9/23843   | 0.243262 | 0.699878 | 0.689408 | Pim1        |
| GO_BP_m4GO:190222erythrose 41/727   | 9/23843   | 0.243262 | 0.699878 | 0.689408 | Fah         |
| GO_BP_m4GO:19022fnegative re1/727   | 9/23843   | 0.243262 | 0.699878 | 0.689408 | Kcne1       |
| GO_BP_m4GO:190397regulation 1/727   | 9/23843   | 0.243262 | 0.699878 | 0.689408 | Ager        |
| GO_BP_m4GO:19042fnegative re1/727   | 9/23843   | 0.243262 | 0.699878 | 0.689408 | Sec13       |
| GO_BP_m4GO:190433regulation 1/727   | 9/23843   | 0.243262 | 0.699878 | 0.689408 | Tiam1       |
| GO_BP_m4GO:190472regulation 1/727   | 9/23843   | 0.243262 | 0.699878 | 0.689408 | Apoa4       |
| GO_BP_m4GO:190521positive re1/727   | 9/23843   | 0.243262 | 0.699878 | 0.689408 | Eif3e       |
| GO_BP_m4GO:200013regulation 1/727   | 9/23843   | 0.243262 | 0.699878 | 0.689408 | Thoc5       |
| GO_BP_m4GO:200027negative re1/727   | 9/23843   | 0.243262 | 0.699878 | 0.689408 | Gas6        |
| GO_BP_m4GO:20003fnegative re1/727   | 9/23843   | 0.243262 | 0.699878 | 0.689408 | Sox17       |
| GO_BP_m4GO:20004fnegative re1/727   | 9/23843   | 0.243262 | 0.699878 | 0.689408 | Rps6ka1     |
| GO_BP_m4GO:20005Cregulation 1/727   | 9/23843   | 0.243262 | 0.699878 | 0.689408 | Gas6        |
| GO_BP_m4GO:200122regulation 1/727   | 9/23843   | 0.243262 | 0.699878 | 0.689408 | Car2        |
| GO_BP_m4GO:00065C GPI anchor 2/727  | 31/23843  | 0.243735 | 0.699878 | 0.689408 | Pigp/Pigv   |
| GO_BP_m4GO:00320fnegative re2/727   | 31/23843  | 0.243735 | 0.699878 | 0.689408 | Oas2/Rps3   |
| GO_BP_m4GO:004433cell-cell ad 2/727 | 31/23843  | 0.243735 | 0.699878 | 0.689408 | Cdh24/Cdhl  |
| GO_BP_m4GO:00511fnegative re2/727   | 31/23843  | 0.243735 | 0.699878 | 0.689408 | Folr1/Slc2a |
| GO_BP_m4GO:007162positive re2/727   | 31/23843  | 0.243735 | 0.699878 | 0.689408 | C3ar1/Sell  |
| GO_BP_m4GO:190102negative re2/727   | 31/23843  | 0.243735 | 0.699878 | 0.689408 | Cbarp/Rerr  |
| GO_BP_m4GO:190547negative re2/727   | 31/23843  | 0.243735 | 0.699878 | 0.689408 | Kcne1/Pid1  |
| GO_BP_m4GO:20003fnegative re2/727   | 31/23843  | 0.243735 | 0.699878 | 0.689408 | Gas6/Il13   |
| GO_BP_m4GO:00074C axonogene17/727   | 461/23843 | 0.244629 | 0.702025 | 0.691522 | Anapc2/Efr  |
| GO_BP_m4GO:00085fnegative re5/727   | 110/23843 | 0.245145 | 0.70266  | 0.692148 | Esr2/Fanca  |
| GO_BP_m4GO:00900fnegative re5/727   | 110/23843 | 0.245145 | 0.70266  | 0.692148 | Ddit3/Map   |
| GO_BP_m4GO:00160fnegative re12/727  | 312/23843 | 0.245855 | 0.704273 | 0.693737 | Rilp/Rundc  |
| GO_BP_m4GO:001403mesenchyr4/727     | 83/23843  | 0.247235 | 0.706957 | 0.696381 | Folr1/Ovol  |
| GO_BP_m4GO:005501cardiac mu4/727    | 83/23843  | 0.247235 | 0.706957 | 0.696381 | Fhl2/Myom   |
| GO_BP_m4GO:190007regulation 4/727   | 83/23843  | 0.247235 | 0.706957 | 0.696381 | C1qtnf12/F  |
| GO_BP_m4GO:000633tRNA meta7/727     | 167/23843 | 0.248774 | 0.710799 | 0.700165 | Dalrd3/Dus  |
| GO_BP_m4GO:00091fnegative re10/727  | 254/23843 | 0.249067 | 0.710799 | 0.700165 | Ak3/Atp5c   |
| GO_BP_m4GO:001821peptidyl-ty12/727  | 313/23843 | 0.249174 | 0.710799 | 0.700165 | Cspg4/Efn   |
| GO_BP_m4GO:19012fnegative re12/727  | 313/23843 | 0.249174 | 0.710799 | 0.700165 | Ak3/Atp5c   |
| GO_BP_m4GO:00615fnegative re18/727  | 493/23843 | 0.249449 | 0.71108  | 0.700441 | Anapc2/Efr  |
| GO_BP_m4GO:00171fnegative re8/727   | 196/23843 | 0.249953 | 0.71108  | 0.700441 | Cacna1g/C   |
| GO_BP_m4GO:004254response tr5/727   | 111/23843 | 0.250865 | 0.71108  | 0.700441 | Lck/Ppp1r1  |
| GO_BP_m4GO:00321Cpositive re11/727  | 284/23843 | 0.25116  | 0.71108  | 0.700441 | Ager/C3ar   |
| GO_BP_m4GO:200013negative re3/727   | 57/23843  | 0.251634 | 0.71108  | 0.700441 | Btn2a2/Pid  |
| GO_BP_m4GO:00423fnegative re16/727  | 434/23843 | 0.253319 | 0.71108  | 0.700441 | Cacna1b/C   |
| GO_BP_m4GO:00488fnegative re4/727   | 84/23843  | 0.253913 | 0.71108  | 0.700441 | Folr1/Ovol  |

|                   |               |        |           |          |         |          |             |
|-------------------|---------------|--------|-----------|----------|---------|----------|-------------|
| GO_BP_m4GO:009706 | dendritic s   | 4/727  | 84/23843  | 0.253913 | 0.71108 | 0.700441 | Arc/Efna1/  |
| GO_BP_m4GO:000035 | spliceosom    | 2/727  | 32/23843  | 0.255125 | 0.71108 | 0.700441 | Gemin5/Sn   |
| GO_BP_m4GO:00065C | GPI anchor    | 2/727  | 32/23843  | 0.255125 | 0.71108 | 0.700441 | Pigp/Pigv   |
| GO_BP_m4GO:000676 | water-solu    | 2/727  | 32/23843  | 0.255125 | 0.71108 | 0.700441 | Folr1/Kynu  |
| GO_BP_m4GO:001045 | regulation    | 2/727  | 32/23843  | 0.255125 | 0.71108 | 0.700441 | Nkx6-2/So   |
| GO_BP_m4GO:002159 | ventricular   | 2/727  | 32/23843  | 0.255125 | 0.71108 | 0.700441 | Anp32b/Nr   |
| GO_BP_m4GO:004507 | positive re   | 2/727  | 32/23843  | 0.255125 | 0.71108 | 0.700441 | Ppid/Ythdc  |
| GO_BP_m4GO:004866 | collateral s  | 2/727  | 32/23843  | 0.255125 | 0.71108 | 0.700441 | Rtn4/Zeb2   |
| GO_BP_m4GO:006066 | embryonic     | 2/727  | 32/23843  | 0.255125 | 0.71108 | 0.700441 | Grb2/Zfp36  |
| GO_BP_m4GO:190342 | regulation    | 2/727  | 32/23843  | 0.255125 | 0.71108 | 0.700441 | Aurka/Ret   |
| GO_BP_m4GO:00324C | regulation    | 10/727 | 256/23843 | 0.256514 | 0.71108 | 0.700441 | Ager/Arc/C  |
| GO_BP_m4GO:000758 | body fluid    | 5/727  | 112/23843 | 0.256619 | 0.71108 | 0.700441 | Neurl1a/O   |
| GO_BP_m4GO:004616 | alcohol bio   | 5/727  | 112/23843 | 0.256619 | 0.71108 | 0.700441 | Apoa4/Cyp   |
| GO_BP_m4GO:004586 | positive re   | 16/727 | 436/23843 | 0.25902  | 0.71108 | 0.700441 | Ager/Cspg   |
| GO_BP_m4GO:000194 | heart loopi   | 3/727  | 58/23843  | 0.259881 | 0.71108 | 0.700441 | Folr1/Ovol  |
| GO_BP_m4GO:000288 | regulation    | 3/727  | 58/23843  | 0.259881 | 0.71108 | 0.700441 | Dnase1/Il1  |
| GO_BP_m4GO:000635 | DNA-temp      | 3/727  | 58/23843  | 0.259881 | 0.71108 | 0.700441 | Nelfe/Recq  |
| GO_BP_m4GO:004246 | photorece     | 3/727  | 58/23843  | 0.259881 | 0.71108 | 0.700441 | Cabp4/Gna   |
| GO_BP_m4GO:004577 | negative re   | 3/727  | 58/23843  | 0.259881 | 0.71108 | 0.700441 | Ffar3/Kcnk  |
| GO_BP_m4GO:006003 | cardiac mu    | 3/727  | 58/23843  | 0.259881 | 0.71108 | 0.700441 | Mapk14/M    |
| GO_BP_m4GO:19023C | regulation    | 3/727  | 58/23843  | 0.259881 | 0.71108 | 0.700441 | Cnksr3/Fxy  |
| GO_BP_m4GO:001403 | neural cres   | 4/727  | 85/23843  | 0.260627 | 0.71108 | 0.700441 | Folr1/Ovol  |
| GO_BP_m4GO:004277 | signal trans  | 4/727  | 85/23843  | 0.260627 | 0.71108 | 0.700441 | Grb2/Mapk   |
| GO_BP_m4GO:004544 | fat cell diff | 9/727  | 228/23843 | 0.261862 | 0.71108 | 0.700441 | Ddit3/Dusp  |
| GO_BP_m4GO:009719 | extrinsic a   | 9/727  | 228/23843 | 0.261862 | 0.71108 | 0.700441 | Bcl10/Ctnn  |
| GO_BP_m4GO:00109C | regulation    | 5/727  | 113/23843 | 0.262405 | 0.71108 | 0.700441 | C1qtnf12/Il |
| GO_BP_m4GO:004654 | developme     | 5/727  | 113/23843 | 0.262405 | 0.71108 | 0.700441 | Esr2/Fanca  |
| GO_BP_m4GO:001076 | regulation    | 12/727 | 317/23843 | 0.262609 | 0.71108 | 0.700441 | Anapc2/Ar   |
| GO_BP_m4GO:009874 | cell-cell ad  | 7/727  | 170/23843 | 0.262707 | 0.71108 | 0.700441 | Cadm2/Cd    |
| GO_BP_m4GO:001604 | cell growth   | 18/727 | 499/23843 | 0.26549  | 0.71108 | 0.700441 | Anapc2/Au   |
| GO_BP_m4GO:004801 | phosphatic    | 6/727  | 142/23843 | 0.266177 | 0.71108 | 0.700441 | Btn2a2/Erb  |
| GO_BP_m4GO:00011C | response tr   | 13/727 | 348/23843 | 0.266185 | 0.71108 | 0.700441 | Abcb4/Ffar  |
| GO_BP_m4GO:000033 | protein der   | 1/727  | 10/23843  | 0.266345 | 0.71108 | 0.700441 | Cops2       |
| GO_BP_m4GO:000234 | histamine     | 1/727  | 10/23843  | 0.266345 | 0.71108 | 0.700441 | Vamp8       |
| GO_BP_m4GO:000244 | histamine     | 1/727  | 10/23843  | 0.266345 | 0.71108 | 0.700441 | Vamp8       |
| GO_BP_m4GO:000255 | histamine     | 1/727  | 10/23843  | 0.266345 | 0.71108 | 0.700441 | Vamp8       |
| GO_BP_m4GO:000293 | desmosom      | 1/727  | 10/23843  | 0.266345 | 0.71108 | 0.700441 | Dsp         |
| GO_BP_m4GO:000603 | chitin meta   | 1/727  | 10/23843  | 0.266345 | 0.71108 | 0.700441 | Ctbs        |
| GO_BP_m4GO:000603 | chitin cata   | 1/727  | 10/23843  | 0.266345 | 0.71108 | 0.700441 | Ctbs        |
| GO_BP_m4GO:000624 | CTP biosyn    | 1/727  | 10/23843  | 0.266345 | 0.71108 | 0.700441 | Nme5        |
| GO_BP_m4GO:000662 | posttransla   | 1/727  | 10/23843  | 0.266345 | 0.71108 | 0.700441 | Folr1       |
| GO_BP_m4GO:000715 | neuron cell   | 1/727  | 10/23843  | 0.266345 | 0.71108 | 0.700441 | Ret         |
| GO_BP_m4GO:000727 | neuron-ne     | 1/727  | 10/23843  | 0.266345 | 0.71108 | 0.700441 | Tmod2       |
| GO_BP_m4GO:00076C | phototrans    | 1/727  | 10/23843  | 0.266345 | 0.71108 | 0.700441 | Gnat1       |
| GO_BP_m4GO:000965 | UV protect    | 1/727  | 10/23843  | 0.266345 | 0.71108 | 0.700441 | Xpa         |
| GO_BP_m4GO:001045 | histone H3    | 1/727  | 10/23843  | 0.266345 | 0.71108 | 0.700441 | Smyd2       |
| GO_BP_m4GO:001083 | positive re   | 1/727  | 10/23843  | 0.266345 | 0.71108 | 0.700441 | Cdh3        |
| GO_BP_m4GO:001089 | positive re   | 1/727  | 10/23843  | 0.266345 | 0.71108 | 0.700441 | Apoa4       |

|                   |                                                    |          |          |         |          |             |
|-------------------|----------------------------------------------------|----------|----------|---------|----------|-------------|
| GO_BP_m4GO:001406 | regulation 1/727                                   | 10/23843 | 0.266345 | 0.71108 | 0.700441 | Lgals3      |
| GO_BP_m4GO:001482 | artery smooth muscle cell 1/727                    | 10/23843 | 0.266345 | 0.71108 | 0.700441 | Cacna1g     |
| GO_BP_m4GO:001488 | transition between cell cycle phases 1/727         | 10/23843 | 0.266345 | 0.71108 | 0.700441 | Nfatc1      |
| GO_BP_m4GO:001626 | gap junction assembly 1/727                        | 10/23843 | 0.266345 | 0.71108 | 0.700441 | Ctnna1      |
| GO_BP_m4GO:002155 | optic nerve development 1/727                      | 10/23843 | 0.266345 | 0.71108 | 0.700441 | Rpl24       |
| GO_BP_m4GO:003207 | positive regulation of cell cycle 1/727            | 10/23843 | 0.266345 | 0.71108 | 0.700441 | Rps3        |
| GO_BP_m4GO:003222 | positive regulation of cell cycle 1/727            | 10/23843 | 0.266345 | 0.71108 | 0.700441 | Htr2c       |
| GO_BP_m4GO:003235 | response to hypoxia 1/727                          | 10/23843 | 0.266345 | 0.71108 | 0.700441 | Inhba       |
| GO_BP_m4GO:003308 | regulation of cell cycle 1/727                     | 10/23843 | 0.266345 | 0.71108 | 0.700441 | Erbp2       |
| GO_BP_m4GO:003309 | negative regulation of cell cycle 1/727            | 10/23843 | 0.266345 | 0.71108 | 0.700441 | Erbp2       |
| GO_BP_m4GO:003318 | regulation of cell cycle 1/727                     | 10/23843 | 0.266345 | 0.71108 | 0.700441 | Trip12      |
| GO_BP_m4GO:003435 | regulation of cell cycle 1/727                     | 10/23843 | 0.266345 | 0.71108 | 0.700441 | Gas6        |
| GO_BP_m4GO:003438 | high-density lipoprotein particle metabolism 1/727 | 10/23843 | 0.266345 | 0.71108 | 0.700441 | Apoa4       |
| GO_BP_m4GO:003524 | peptidyl-arginine catabolism 1/727                 | 10/23843 | 0.266345 | 0.71108 | 0.700441 | Prmt9       |
| GO_BP_m4GO:003524 | peptidyl-arginine catabolism 1/727                 | 10/23843 | 0.266345 | 0.71108 | 0.700441 | Prmt9       |
| GO_BP_m4GO:003573 | hepatic stellate cell activation 1/727             | 10/23843 | 0.266345 | 0.71108 | 0.700441 | Rps6ka1     |
| GO_BP_m4GO:003587 | protein kinase C signaling 1/727                   | 10/23843 | 0.266345 | 0.71108 | 0.700441 | Otud6a      |
| GO_BP_m4GO:004209 | interleukin-1 signaling 1/727                      | 10/23843 | 0.266345 | 0.71108 | 0.700441 | Rela        |
| GO_BP_m4GO:004392 | exonucleolus organization 1/727                    | 10/23843 | 0.266345 | 0.71108 | 0.700441 | Cnot6       |
| GO_BP_m4GO:004507 | regulation of cell cycle 1/727                     | 10/23843 | 0.266345 | 0.71108 | 0.700441 | Rela        |
| GO_BP_m4GO:004603 | CTP metabolism 1/727                               | 10/23843 | 0.266345 | 0.71108 | 0.700441 | Nme5        |
| GO_BP_m4GO:004654 | development of the eye 1/727                       | 10/23843 | 0.266345 | 0.71108 | 0.700441 | Irf2bpl     |
| GO_BP_m4GO:004688 | follicle-stimulating hormone signaling 1/727       | 10/23843 | 0.266345 | 0.71108 | 0.700441 | Inhba       |
| GO_BP_m4GO:004748 | regulation of cell cycle 1/727                     | 10/23843 | 0.266345 | 0.71108 | 0.700441 | Mlc1        |
| GO_BP_m4GO:004828 | vesicle fusion 1/727                               | 10/23843 | 0.266345 | 0.71108 | 0.700441 | Sec22b      |
| GO_BP_m4GO:005100 | positive regulation of cell cycle 1/727            | 10/23843 | 0.266345 | 0.71108 | 0.700441 | Apoa4       |
| GO_BP_m4GO:005129 | nuclear pore complex assembly 1/727                | 10/23843 | 0.266345 | 0.71108 | 0.700441 | Rtn4        |
| GO_BP_m4GO:005165 | maintenance of cell cycle 1/727                    | 10/23843 | 0.266345 | 0.71108 | 0.700441 | Polr2m      |
| GO_BP_m4GO:005191 | regulation of cell cycle 1/727                     | 10/23843 | 0.266345 | 0.71108 | 0.700441 | F12         |
| GO_BP_m4GO:005197 | positive regulation of cell cycle 1/727            | 10/23843 | 0.266345 | 0.71108 | 0.700441 | Hcrt        |
| GO_BP_m4GO:006071 | chorioallantoic membrane development 1/727         | 10/23843 | 0.266345 | 0.71108 | 0.700441 | Zfp361l1    |
| GO_BP_m4GO:007024 | negative regulation of cell cycle 1/727            | 10/23843 | 0.266345 | 0.71108 | 0.700441 | Efna1       |
| GO_BP_m4GO:007107 | positive regulation of cell cycle 1/727            | 10/23843 | 0.266345 | 0.71108 | 0.700441 | Htr2c       |
| GO_BP_m4GO:007168 | striated muscle cell development 1/727             | 10/23843 | 0.266345 | 0.71108 | 0.700441 | Myom2       |
| GO_BP_m4GO:007552 | IRES-dependent translation 1/727                   | 10/23843 | 0.266345 | 0.71108 | 0.700441 | Eif3a       |
| GO_BP_m4GO:009018 | regulation of cell cycle 1/727                     | 10/23843 | 0.266345 | 0.71108 | 0.700441 | Vamp8       |
| GO_BP_m4GO:009020 | negative regulation of cell cycle 1/727            | 10/23843 | 0.266345 | 0.71108 | 0.700441 | Sik1        |
| GO_BP_m4GO:009059 | inflammatory response 1/727                        | 10/23843 | 0.266345 | 0.71108 | 0.700441 | Ager        |
| GO_BP_m4GO:009708 | vascular smooth muscle cell development 1/727      | 10/23843 | 0.266345 | 0.71108 | 0.700441 | Sgcb        |
| GO_BP_m4GO:009742 | liver regeneration 1/727                           | 10/23843 | 0.266345 | 0.71108 | 0.700441 | Aurka       |
| GO_BP_m4GO:190019 | regulation of cell cycle 1/727                     | 10/23843 | 0.266345 | 0.71108 | 0.700441 | Aurka       |
| GO_BP_m4GO:190045 | positive regulation of cell cycle 1/727            | 10/23843 | 0.266345 | 0.71108 | 0.700441 | Arc         |
| GO_BP_m4GO:190138 | positive regulation of cell cycle 1/727            | 10/23843 | 0.266345 | 0.71108 | 0.700441 | Kcne1       |
| GO_BP_m4GO:190241 | regulation of cell cycle 1/727                     | 10/23843 | 0.266345 | 0.71108 | 0.700441 | Eif3e       |
| GO_BP_m4GO:190381 | negative regulation of cell cycle 1/727            | 10/23843 | 0.266345 | 0.71108 | 0.700441 | Kcne1       |
| GO_BP_m4GO:200004 | negative regulation of cell cycle 1/727            | 10/23843 | 0.266345 | 0.71108 | 0.700441 | Recql5      |
| GO_BP_m4GO:000046 | maturational cell cycle 2/727                      | 33/23843 | 0.266525 | 0.71108 | 0.700441 | Eri2/Mpho:  |
| GO_BP_m4GO:001482 | response to hypoxia 2/727                          | 33/23843 | 0.266525 | 0.71108 | 0.700441 | Mir709/Slc: |

|                    |              |        |           |          |          |          |             |
|--------------------|--------------|--------|-----------|----------|----------|----------|-------------|
| GO_BP_m4GO:003111  | positive re  | 2/727  | 33/23843  | 0.266525 | 0.71108  | 0.700441 | Nav3/Rps3   |
| GO_BP_m4GO:00343C  | primary alc  | 2/727  | 33/23843  | 0.266525 | 0.71108  | 0.700441 | Abhd4/Gdq   |
| GO_BP_m4GO:00430C  | Golgi to pl  | 2/727  | 33/23843  | 0.266525 | 0.71108  | 0.700441 | Blzf1/Rab3  |
| GO_BP_m4GO:004562  | regulation   | 2/727  | 33/23843  | 0.266525 | 0.71108  | 0.700441 | Il27/Socs5  |
| GO_BP_m4GO:00456E  | negative re  | 2/727  | 33/23843  | 0.266525 | 0.71108  | 0.700441 | Dusp10/Nk   |
| GO_BP_m4GO:004574  | negative re  | 2/727  | 33/23843  | 0.266525 | 0.71108  | 0.700441 | Neur1a/Ov   |
| GO_BP_m4GO:00464E  | neutral lipi | 2/727  | 33/23843  | 0.266525 | 0.71108  | 0.700441 | Apoa4/Lipc  |
| GO_BP_m4GO:00464E  | acylglycero  | 2/727  | 33/23843  | 0.266525 | 0.71108  | 0.700441 | Apoa4/Lipc  |
| GO_BP_m4GO:004801  | ephrin rec   | 2/727  | 33/23843  | 0.266525 | 0.71108  | 0.700441 | Efna1/Tiam  |
| GO_BP_m4GO:00481C  | Golgi vesic  | 2/727  | 33/23843  | 0.266525 | 0.71108  | 0.700441 | Sec13/Tme   |
| GO_BP_m4GO:00506E  | negative re  | 2/727  | 33/23843  | 0.266525 | 0.71108  | 0.700441 | Nelfe/Srsf1 |
| GO_BP_m4GO:190074  | regulation   | 2/727  | 33/23843  | 0.266525 | 0.71108  | 0.700441 | Ager/Dusp   |
| GO_BP_m4GO:19039E  | regulation   | 2/727  | 33/23843  | 0.266525 | 0.71108  | 0.700441 | Irs2/Ripk1  |
| GO_BP_m4GO:00093C  | amine met.   | 4/727  | 86/23843  | 0.267375 | 0.712027 | 0.701375 | Abhd4/Gdq   |
| GO_BP_m4GO:00512E  | protein hor  | 4/727  | 86/23843  | 0.267375 | 0.712027 | 0.701375 | Decr1/Mbl   |
| GO_BP_m4GO:003021T | cell differ  | 10/727 | 259/23843 | 0.267821 | 0.712027 | 0.701375 | Btn2a2/Du   |
| GO_BP_m4GO:007122  | cellular res | 10/727 | 259/23843 | 0.267821 | 0.712027 | 0.701375 | AY761184/   |
| GO_BP_m4GO:00066E  | phosphatic   | 3/727  | 59/23843  | 0.268163 | 0.712027 | 0.701375 | Htr2c/Pigp  |
| GO_BP_m4GO:003267  | regulation   | 3/727  | 59/23843  | 0.268163 | 0.712027 | 0.701375 | Bcl10/Ddit  |
| GO_BP_m4GO:004684  | filopodium   | 3/727  | 59/23843  | 0.268163 | 0.712027 | 0.701375 | Neur1a/Sp   |
| GO_BP_m4GO:006071  | labyrinthin  | 3/727  | 59/23843  | 0.268163 | 0.712027 | 0.701375 | Grb2/Ovol   |
| GO_BP_m4GO:003157  | DNA integri  | 5/727  | 114/23843 | 0.26822  | 0.712027 | 0.701375 | Hus1/Mapl   |
| GO_BP_m4GO:00076C  | sensory pe   | 10/727 | 260/23843 | 0.271625 | 0.720666 | 0.709884 | Mir16-2/M   |
| GO_BP_m4GO:00106C  | posttranscr  | 17/727 | 471/23843 | 0.272263 | 0.721957 | 0.711156 | Cnot6/Eif3  |
| GO_BP_m4GO:00362E  | cellular res | 5/727  | 115/23843 | 0.274064 | 0.723422 | 0.712599 | Fndc1/Hp1   |
| GO_BP_m4GO:00026E  | positive re  | 4/727  | 87/23843  | 0.274154 | 0.723422 | 0.712599 | C3ar1/Gast  |
| GO_BP_m4GO:00068E  | post-Golgi   | 4/727  | 87/23843  | 0.274154 | 0.723422 | 0.712599 | Blzf1/Gak1  |
| GO_BP_m4GO:010602  | neuron prc   | 4/727  | 87/23843  | 0.274154 | 0.723422 | 0.712599 | Arc/Efna1/  |
| GO_BP_m4GO:00061E  | purine nuc   | 10/727 | 261/23843 | 0.275446 | 0.723422 | 0.712599 | Ak3/Atp5c   |
| GO_BP_m4GO:004592  | negative re  | 10/727 | 261/23843 | 0.275446 | 0.723422 | 0.712599 | Dusp10/Int  |
| GO_BP_m4GO:005092  | regulation   | 8/727  | 202/23843 | 0.275822 | 0.723422 | 0.712599 | Ager/C3ar   |
| GO_BP_m4GO:00986E  | anion trans  | 8/727  | 202/23843 | 0.275822 | 0.723422 | 0.712599 | Irs2/Lrrc8c |
| GO_BP_m4GO:00609E  | positive re  | 3/727  | 60/23843  | 0.276475 | 0.723422 | 0.712599 | Itsn1/Neur  |
| GO_BP_m4GO:003017  | negative re  | 6/727  | 144/23843 | 0.276576 | 0.723422 | 0.712599 | Ddit3/Map   |
| GO_BP_m4GO:000267  | positive re  | 2/727  | 34/23843  | 0.277923 | 0.723422 | 0.712599 | F12/Ffar3   |
| GO_BP_m4GO:00080E  | neuron rec   | 2/727  | 34/23843  | 0.277923 | 0.723422 | 0.712599 | Rtn4/Tnn    |
| GO_BP_m4GO:00302E  | chromosor    | 2/727  | 34/23843  | 0.277923 | 0.723422 | 0.712599 | Ern2/Ncap   |
| GO_BP_m4GO:00320E  | response tr  | 2/727  | 34/23843  | 0.277923 | 0.723422 | 0.712599 | Bcl10/Slc2E |
| GO_BP_m4GO:003362  | regulation   | 2/727  | 34/23843  | 0.277923 | 0.723422 | 0.712599 | Efna1/Ret   |
| GO_BP_m4GO:003424  | regulation   | 2/727  | 34/23843  | 0.277923 | 0.723422 | 0.712599 | Nelfe/Recq  |
| GO_BP_m4GO:00424E  | ribonucleo   | 2/727  | 34/23843  | 0.277923 | 0.723422 | 0.712599 | Nme5/Pdcl   |
| GO_BP_m4GO:007057  | regulation   | 2/727  | 34/23843  | 0.277923 | 0.723422 | 0.712599 | Rtn4/Rtn4r  |
| GO_BP_m4GO:00713E  | cellular res | 2/727  | 34/23843  | 0.277923 | 0.723422 | 0.712599 | Ffar3/Pid1  |
| GO_BP_m4GO:190001  | regulation   | 2/727  | 34/23843  | 0.277923 | 0.723422 | 0.712599 | Mapk14/M    |
| GO_BP_m4GO:000712  | meiosis I    | 5/727  | 116/23843 | 0.279934 | 0.723422 | 0.712599 | Cenps/Aurl  |
| GO_BP_m4GO:00517C  | interaction  | 5/727  | 116/23843 | 0.279934 | 0.723422 | 0.712599 | Gas6/Serpi  |
| GO_BP_m4GO:00455E  | positive re  | 4/727  | 88/23843  | 0.280961 | 0.723422 | 0.712599 | Btn2a2/Du   |
| GO_BP_m4GO:190122  | regulation   | 4/727  | 88/23843  | 0.280961 | 0.723422 | 0.712599 | Ager/Rela/  |

|                               |        |           |          |          |          |            |
|-------------------------------|--------|-----------|----------|----------|----------|------------|
| GO_BP_m4GO:000633chromatin    | 6/727  | 145/23843 | 0.281811 | 0.723422 | 0.712599 | Anp32b/Nj  |
| GO_BP_m4GO:000926ribonucleo   | 10/727 | 263/23843 | 0.283135 | 0.723422 | 0.712599 | Ak3/Atp5c: |
| GO_BP_m4GO:005086regulation   | 11/727 | 293/23843 | 0.283425 | 0.723422 | 0.712599 | Ager/Bcl10 |
| GO_BP_m4GO:003085positive re  | 3/727  | 61/23843  | 0.284811 | 0.723422 | 0.712599 | Ovol2/Vdr/ |
| GO_BP_m4GO:004566regulation   | 3/727  | 61/23843  | 0.284811 | 0.723422 | 0.712599 | Ddit3/Map  |
| GO_BP_m4GO:004662regulation   | 3/727  | 61/23843  | 0.284811 | 0.723422 | 0.712599 | C1qtnf12/F |
| GO_BP_m4GO:005159response tr  | 3/727  | 61/23843  | 0.284811 | 0.723422 | 0.712599 | Duox2/Slc8 |
| GO_BP_m4GO:190280negative re  | 3/727  | 61/23843  | 0.284811 | 0.723422 | 0.712599 | Btn2a2/Pid |
| GO_BP_m4GO:200125positive re  | 3/727  | 61/23843  | 0.284811 | 0.723422 | 0.712599 | Arc/Kcne1/ |
| GO_BP_m4GO:003476regulation   | 16/727 | 445/23843 | 0.285243 | 0.723422 | 0.712599 | Ager/Arc/C |
| GO_BP_m4GO:005109positive re  | 5/727  | 117/23843 | 0.285828 | 0.723422 | 0.712599 | Ager/Bcl10 |
| GO_BP_m4GO:190037regulation   | 5/727  | 117/23843 | 0.285828 | 0.723422 | 0.712599 | Cap2/Gngi  |
| GO_BP_m4GO:000681potassium    | 9/727  | 234/23843 | 0.286264 | 0.723422 | 0.712599 | Ager/Atp11 |
| GO_BP_m4GO:005500cardiac cell | 4/727  | 89/23843  | 0.287794 | 0.723422 | 0.712599 | Fhl2/Myom  |
| GO_BP_m4GO:000173formation    | 1/727  | 11/23843  | 0.288724 | 0.723422 | 0.712599 | Rps2       |
| GO_BP_m4GO:000326cardioblast  | 1/727  | 11/23843  | 0.288724 | 0.723422 | 0.712599 | Pim1       |
| GO_BP_m4GO:000326regulation   | 1/727  | 11/23843  | 0.288724 | 0.723422 | 0.712599 | Pim1       |
| GO_BP_m4GO:000330Wnt signali  | 1/727  | 11/23843  | 0.288724 | 0.723422 | 0.712599 | Sox17      |
| GO_BP_m4GO:000618GTP biosyn   | 1/727  | 11/23843  | 0.288724 | 0.723422 | 0.712599 | Nme5       |
| GO_BP_m4GO:000652arginine ca  | 1/727  | 11/23843  | 0.288724 | 0.723422 | 0.712599 | Fah        |
| GO_BP_m4GO:000656tryptophan   | 1/727  | 11/23843  | 0.288724 | 0.723422 | 0.712599 | Kynu       |
| GO_BP_m4GO:000656indolalkylal | 1/727  | 11/23843  | 0.288724 | 0.723422 | 0.712599 | Kynu       |
| GO_BP_m4GO:000665phosphatic   | 1/727  | 11/23843  | 0.288724 | 0.723422 | 0.712599 | Lipc       |
| GO_BP_m4GO:000697DNA dama     | 1/727  | 11/23843  | 0.288724 | 0.723422 | 0.712599 | Pidd1      |
| GO_BP_m4GO:000920pyrimidine   | 1/727  | 11/23843  | 0.288724 | 0.723422 | 0.712599 | Nme5       |
| GO_BP_m4GO:001071negative re  | 1/727  | 11/23843  | 0.288724 | 0.723422 | 0.712599 | Ager       |
| GO_BP_m4GO:001087regulation   | 1/727  | 11/23843  | 0.288724 | 0.723422 | 0.712599 | Apoa4      |
| GO_BP_m4GO:001405regulation   | 1/727  | 11/23843  | 0.288724 | 0.723422 | 0.712599 | Htr2c      |
| GO_BP_m4GO:003103myosin fila  | 1/727  | 11/23843  | 0.288724 | 0.723422 | 0.712599 | Myom2      |
| GO_BP_m4GO:003296negative re  | 1/727  | 11/23843  | 0.288724 | 0.723422 | 0.712599 | Ager       |
| GO_BP_m4GO:003308immature     | 1/727  | 11/23843  | 0.288724 | 0.723422 | 0.712599 | Erbp2      |
| GO_BP_m4GO:003323negative re  | 1/727  | 11/23843  | 0.288724 | 0.723422 | 0.712599 | Rela       |
| GO_BP_m4GO:003360positive re  | 1/727  | 11/23843  | 0.288724 | 0.723422 | 0.712599 | Rtn4       |
| GO_BP_m4GO:003370phospholi    | 1/727  | 11/23843  | 0.288724 | 0.723422 | 0.712599 | Apoa4      |
| GO_BP_m4GO:003437high-densi   | 1/727  | 11/23843  | 0.288724 | 0.723422 | 0.712599 | Lipc       |
| GO_BP_m4GO:003545cellular res | 1/727  | 11/23843  | 0.288724 | 0.723422 | 0.712599 | Gas6       |
| GO_BP_m4GO:003584photorecep   | 1/727  | 11/23843  | 0.288724 | 0.723422 | 0.712599 | Nphp1      |
| GO_BP_m4GO:003816angiotensir  | 1/727  | 11/23843  | 0.288724 | 0.723422 | 0.712599 | Car2       |
| GO_BP_m4GO:004356positive re  | 1/727  | 11/23843  | 0.288724 | 0.723422 | 0.712599 | Cdh3       |
| GO_BP_m4GO:004455relaxation   | 1/727  | 11/23843  | 0.288724 | 0.723422 | 0.712599 | Slc8a1     |
| GO_BP_m4GO:004564negative re  | 1/727  | 11/23843  | 0.288724 | 0.723422 | 0.712599 | Zfp3611    |
| GO_BP_m4GO:004587positive re  | 1/727  | 11/23843  | 0.288724 | 0.723422 | 0.712599 | Sfpq       |
| GO_BP_m4GO:004600negative re  | 1/727  | 11/23843  | 0.288724 | 0.723422 | 0.712599 | Btn2a2     |
| GO_BP_m4GO:004668response tr  | 1/727  | 11/23843  | 0.288724 | 0.723422 | 0.712599 | Aqp9       |
| GO_BP_m4GO:004826determinat   | 1/727  | 11/23843  | 0.288724 | 0.723422 | 0.712599 | Ddit3      |
| GO_BP_m4GO:004826determinat   | 1/727  | 11/23843  | 0.288724 | 0.723422 | 0.712599 | Ddit3      |
| GO_BP_m4GO:004861embryonic    | 1/727  | 11/23843  | 0.288724 | 0.723422 | 0.712599 | Sox17      |
| GO_BP_m4GO:004868positive re  | 1/727  | 11/23843  | 0.288724 | 0.723422 | 0.712599 | Rtn4       |

|                               |        |           |          |          |          |             |
|-------------------------------|--------|-----------|----------|----------|----------|-------------|
| GO_BP_m4GO:004884venous blo   | 1/727  | 11/23843  | 0.288724 | 0.723422 | 0.712599 | Ccm2        |
| GO_BP_m4GO:005066hydrogen r   | 1/727  | 11/23843  | 0.288724 | 0.723422 | 0.712599 | Cyp1a2      |
| GO_BP_m4GO:005501ventricular  | 1/727  | 11/23843  | 0.288724 | 0.723422 | 0.712599 | Fhl2        |
| GO_BP_m4GO:006005mammary      | 1/727  | 11/23843  | 0.288724 | 0.723422 | 0.712599 | Vdr         |
| GO_BP_m4GO:00613Ccardiac net  | 1/727  | 11/23843  | 0.288724 | 0.723422 | 0.712599 | Folr1       |
| GO_BP_m4GO:006136positive re  | 1/727  | 11/23843  | 0.288724 | 0.723422 | 0.712599 | Apoa4       |
| GO_BP_m4GO:007047regulation   | 1/727  | 11/23843  | 0.288724 | 0.723422 | 0.712599 | Lck         |
| GO_BP_m4GO:007091UV-damag     | 1/727  | 11/23843  | 0.288724 | 0.723422 | 0.712599 | Xpa         |
| GO_BP_m4GO:007129cellular res | 1/727  | 11/23843  | 0.288724 | 0.723422 | 0.712599 | Mt1         |
| GO_BP_m4GO:007163positive re  | 1/727  | 11/23843  | 0.288724 | 0.723422 | 0.712599 | Ager        |
| GO_BP_m4GO:007212regulation   | 1/727  | 11/23843  | 0.288724 | 0.723422 | 0.712599 | C3ar1       |
| GO_BP_m4GO:008601AV node c    | 1/727  | 11/23843  | 0.288724 | 0.723422 | 0.712599 | Cacna1g     |
| GO_BP_m4GO:008602AV node c    | 1/727  | 11/23843  | 0.288724 | 0.723422 | 0.712599 | Cacna1g     |
| GO_BP_m4GO:009007positive re  | 1/727  | 11/23843  | 0.288724 | 0.723422 | 0.712599 | Traf4       |
| GO_BP_m4GO:009709synaptic ve  | 1/727  | 11/23843  | 0.288724 | 0.723422 | 0.712599 | Syn1        |
| GO_BP_m4GO:190036regulation   | 1/727  | 11/23843  | 0.288724 | 0.723422 | 0.712599 | Nelfe       |
| GO_BP_m4GO:190166calcium ior  | 1/727  | 11/23843  | 0.288724 | 0.723422 | 0.712599 | Slc8a1      |
| GO_BP_m4GO:19020Cpositive re  | 1/727  | 11/23843  | 0.288724 | 0.723422 | 0.712599 | Efna1       |
| GO_BP_m4GO:190223positive re  | 1/727  | 11/23843  | 0.288724 | 0.723422 | 0.712599 | Rps3        |
| GO_BP_m4GO:19036Epositive re  | 1/727  | 11/23843  | 0.288724 | 0.723422 | 0.712599 | Ptpn23      |
| GO_BP_m4GO:20007Epositive re  | 1/727  | 11/23843  | 0.288724 | 0.723422 | 0.712599 | 5330417C2   |
| GO_BP_m4GO:000991epidermal    | 18/727 | 205/23843 | 0.289025 | 0.723422 | 0.712599 | Cdh3/Dsp/   |
| GO_BP_m4GO:000009sulfur amin  | 2/727  | 35/23843  | 0.289308 | 0.723422 | 0.712599 | Bhmt/Dpe    |
| GO_BP_m4GO:000682iron ion tra | 2/727  | 35/23843  | 0.289308 | 0.723422 | 0.712599 | Heph/Slc2E  |
| GO_BP_m4GO:00170Cantibiotic c | 2/727  | 35/23843  | 0.289308 | 0.723422 | 0.712599 | Apoa4/Mp    |
| GO_BP_m4GO:00320Cpositive re  | 2/727  | 35/23843  | 0.289308 | 0.723422 | 0.712599 | Gas6/Sec1   |
| GO_BP_m4GO:00330Cregulation   | 2/727  | 35/23843  | 0.289308 | 0.723422 | 0.712599 | Il13/VampE  |
| GO_BP_m4GO:003314positive re  | 2/727  | 35/23843  | 0.289308 | 0.723422 | 0.712599 | Ifna12/Ret  |
| GO_BP_m4GO:00433Cregulation   | 2/727  | 35/23843  | 0.289308 | 0.723422 | 0.712599 | Il13/VampE  |
| GO_BP_m4GO:00466Eresponse tr  | 2/727  | 35/23843  | 0.289308 | 0.723422 | 0.712599 | Cyp1a2/Mt   |
| GO_BP_m4GO:005169actin filame | 2/727  | 35/23843  | 0.289308 | 0.723422 | 0.712599 | Sptan1/Tm   |
| GO_BP_m4GO:007136cellular res | 2/727  | 35/23843  | 0.289308 | 0.723422 | 0.712599 | ErbB2/ZfpE  |
| GO_BP_m4GO:009002regulation   | 2/727  | 35/23843  | 0.289308 | 0.723422 | 0.712599 | C3ar1/Sell  |
| GO_BP_m4GO:19013Epositive re  | 2/727  | 35/23843  | 0.289308 | 0.723422 | 0.712599 | Ager/Kcne   |
| GO_BP_m4GO:190197regulation   | 2/727  | 35/23843  | 0.289308 | 0.723422 | 0.712599 | Aurka/Thor  |
| GO_BP_m4GO:190274apoptotic r  | 2/727  | 35/23843  | 0.289308 | 0.723422 | 0.712599 | Fgf4/Vdr    |
| GO_BP_m4GO:20007Eregulation   | 2/727  | 35/23843  | 0.289308 | 0.723422 | 0.712599 | 5330417C2   |
| GO_BP_m4GO:003009lymphocyt    | 14/727 | 386/23843 | 0.291317 | 0.726855 | 0.715981 | Btn2a2/Du   |
| GO_BP_m4GO:00085Emale gona    | 5/727  | 118/23843 | 0.291745 | 0.726855 | 0.715981 | Brip1/Esr2/ |
| GO_BP_m4GO:001699antibiotic n | 5/727  | 118/23843 | 0.291745 | 0.726855 | 0.715981 | Apoa4/Cyc   |
| GO_BP_m4GO:00308Cregulation   | 5/727  | 118/23843 | 0.291745 | 0.726855 | 0.715981 | Cap2/Gng    |
| GO_BP_m4GO:005072positive re  | 5/727  | 118/23843 | 0.291745 | 0.726855 | 0.715981 | Ager/F12/F  |
| GO_BP_m4GO:00610Chepaticobil  | 5/727  | 118/23843 | 0.291745 | 0.726855 | 0.715981 | Aurka/Gak   |
| GO_BP_m4GO:00619Emeiosis I c  | 5/727  | 118/23843 | 0.291745 | 0.726855 | 0.715981 | Cenps/Aurl  |
| GO_BP_m4GO:000267regulation   | 3/727  | 62/23843  | 0.293168 | 0.72888  | 0.717975 | Dnase1/F1   |
| GO_BP_m4GO:000924glycolipid   | 3/727  | 62/23843  | 0.293168 | 0.72888  | 0.717975 | A4galt/Pig  |
| GO_BP_m4GO:001591phospholi    | 3/727  | 62/23843  | 0.293168 | 0.72888  | 0.717975 | Abcb4/Apc   |
| GO_BP_m4GO:00420Eregulation   | 3/727  | 62/23843  | 0.293168 | 0.72888  | 0.717975 | Esr2/Neurl  |



|                   |               |        |           |          |          |          |              |
|-------------------|---------------|--------|-----------|----------|----------|----------|--------------|
| GO_BP_m4GO:004506 | regulation    | 4/727  | 90/23843  | 0.29465  | 0.731368 | 0.720427 | A230050P2    |
| GO_BP_m4GO:004668 | response to   | 4/727  | 90/23843  | 0.29465  | 0.731368 | 0.720427 | Duox2/Sell   |
| GO_BP_m4GO:004639 | ribose phos   | 10/727 | 266/23843 | 0.294781 | 0.731368 | 0.720427 | Ak3/Atp5c:   |
| GO_BP_m4GO:007252 | purine-con    | 10/727 | 266/23843 | 0.294781 | 0.731368 | 0.720427 | Ak3/Atp5c:   |
| GO_BP_m4GO:004654 | developme     | 5/727  | 119/23843 | 0.297684 | 0.732658 | 0.721697 | Brip1/Esr2/  |
| GO_BP_m4GO:005192 | positive re   | 5/727  | 119/23843 | 0.297684 | 0.732658 | 0.721697 | Hcrt/Il13/K  |
| GO_BP_m4GO:000931 | response to   | 14/727 | 388/23843 | 0.297763 | 0.732658 | 0.721697 | Agap3/Cak    |
| GO_BP_m4GO:003241 | regulation    | 9/727  | 237/23843 | 0.298689 | 0.732658 | 0.721697 | Ager/Arc/C   |
| GO_BP_m4GO:000606 | alcohol me    | 10/727 | 267/23843 | 0.298691 | 0.732658 | 0.721697 | Abhd4/Akr    |
| GO_BP_m4GO:019873 | cell-cell sig | 15/727 | 419/23843 | 0.299136 | 0.732658 | 0.721697 | Cdh3/Ddit3   |
| GO_BP_m4GO:000916 | nucleoside    | 2/727  | 36/23843  | 0.300672 | 0.732658 | 0.721697 | Nme5/Pdcl    |
| GO_BP_m4GO:003245 | endocytic r   | 2/727  | 36/23843  | 0.300672 | 0.732658 | 0.721697 | Ehd4/Ptpn:   |
| GO_BP_m4GO:003410 | positive re   | 2/727  | 36/23843  | 0.300672 | 0.732658 | 0.721697 | Car2/Vdr     |
| GO_BP_m4GO:004298 | amyloid pr    | 2/727  | 36/23843  | 0.300672 | 0.732658 | 0.721697 | Efna1/Tme    |
| GO_BP_m4GO:004683 | phospholip    | 2/727  | 36/23843  | 0.300672 | 0.732658 | 0.721697 | Plppr3/Plp   |
| GO_BP_m4GO:004816 | regulation    | 2/727  | 36/23843  | 0.300672 | 0.732658 | 0.721697 | Neur1a/Sy    |
| GO_BP_m4GO:005093 | pigment ce    | 2/727  | 36/23843  | 0.300672 | 0.732658 | 0.721697 | Mreg/Zeb2    |
| GO_BP_m4GO:005129 | establishm    | 2/727  | 36/23843  | 0.300672 | 0.732658 | 0.721697 | Spdl1/Spry   |
| GO_BP_m4GO:006190 | glial cell ac | 2/727  | 36/23843  | 0.300672 | 0.732658 | 0.721697 | Ager/Il13    |
| GO_BP_m4GO:007020 | protein hor   | 2/727  | 36/23843  | 0.300672 | 0.732658 | 0.721697 | Atxn10/Mt    |
| GO_BP_m4GO:007132 | cellular res  | 2/727  | 36/23843  | 0.300672 | 0.732658 | 0.721697 | Slc8a1/Zfp:  |
| GO_BP_m4GO:009702 | dendritic c   | 2/727  | 36/23843  | 0.300672 | 0.732658 | 0.721697 | Ager/Gata1   |
| GO_BP_m4GO:009748 | dendrite ex   | 2/727  | 36/23843  | 0.300672 | 0.732658 | 0.721697 | Nedd4/Rtr    |
| GO_BP_m4GO:004210 | positive re   | 3/727  | 63/23843  | 0.30154  | 0.732658 | 0.721697 | Bcl10/Il27/I |
| GO_BP_m4GO:004227 | purine nuc    | 3/727  | 63/23843  | 0.30154  | 0.732658 | 0.721697 | Ak3/Dguok    |
| GO_BP_m4GO:004800 | antigen pr    | 3/727  | 63/23843  | 0.30154  | 0.732658 | 0.721697 | H2-M10.1/    |
| GO_BP_m4GO:007121 | cellular res  | 10/727 | 268/23843 | 0.302615 | 0.732658 | 0.721697 | AY761184/    |
| GO_BP_m4GO:003083 | regulation    | 7/727  | 179/23843 | 0.305684 | 0.732658 | 0.721697 | Arhgap18/    |
| GO_BP_m4GO:005087 | positive re   | 7/727  | 179/23843 | 0.305684 | 0.732658 | 0.721697 | Ager/Bcl10   |
| GO_BP_m4GO:000269 | negative re   | 5/727  | 121/23843 | 0.309618 | 0.732658 | 0.721697 | Dusp10/Lg    |
| GO_BP_m4GO:003263 | interleukin   | 3/727  | 64/23843  | 0.309924 | 0.732658 | 0.721697 | Bcl10/Ddit:  |
| GO_BP_m4GO:004682 | positive re   | 3/727  | 64/23843  | 0.309924 | 0.732658 | 0.721697 | Gas6/Mapk    |
| GO_BP_m4GO:006137 | determinat    | 3/727  | 64/23843  | 0.309924 | 0.732658 | 0.721697 | Folr1/Ovol:  |
| GO_BP_m4GO:000208 | protein de    | 1/727  | 12/23843  | 0.310422 | 0.732658 | 0.721697 | Abhd13       |
| GO_BP_m4GO:000243 | compleme      | 1/727  | 12/23843  | 0.310422 | 0.732658 | 0.721697 | C3ar1        |
| GO_BP_m4GO:000309 | regulation    | 1/727  | 12/23843  | 0.310422 | 0.732658 | 0.721697 | Gas6         |
| GO_BP_m4GO:000318 | mitral valv   | 1/727  | 12/23843  | 0.310422 | 0.732658 | 0.721697 | Efna1        |
| GO_BP_m4GO:000608 | acetyl-CoA    | 1/727  | 12/23843  | 0.310422 | 0.732658 | 0.721697 | Pdhx         |
| GO_BP_m4GO:000612 | mitochond     | 1/727  | 12/23843  | 0.310422 | 0.732658 | 0.721697 | Cycs         |
| GO_BP_m4GO:000657 | tyrosine m    | 1/727  | 12/23843  | 0.310422 | 0.732658 | 0.721697 | Fah          |
| GO_BP_m4GO:000685 | oligopeptic   | 1/727  | 12/23843  | 0.310422 | 0.732658 | 0.721697 | Car2         |
| GO_BP_m4GO:000744 | foregut mc    | 1/727  | 12/23843  | 0.310422 | 0.732658 | 0.721697 | Sox17        |
| GO_BP_m4GO:001075 | regulation    | 1/727  | 12/23843  | 0.310422 | 0.732658 | 0.721697 | F12          |
| GO_BP_m4GO:001088 | regulation    | 1/727  | 12/23843  | 0.310422 | 0.732658 | 0.721697 | Apoc4        |
| GO_BP_m4GO:001482 | tonic smoc    | 1/727  | 12/23843  | 0.310422 | 0.732658 | 0.721697 | Cacna1g      |
| GO_BP_m4GO:001644 | somatic hy    | 1/727  | 12/23843  | 0.310422 | 0.732658 | 0.721697 | Polb         |
| GO_BP_m4GO:001655 | protein im    | 1/727  | 12/23843  | 0.310422 | 0.732658 | 0.721697 | Pex1         |
| GO_BP_m4GO:001815 | protein oxi   | 1/727  | 12/23843  | 0.310422 | 0.732658 | 0.721697 | Trabd2b      |

|                                     |          |          |          |          |           |
|-------------------------------------|----------|----------|----------|----------|-----------|
| GO_BP_m4GO:002152ventral spir1/727  | 12/23843 | 0.310422 | 0.732658 | 0.721697 | Nkx6-2    |
| GO_BP_m4GO:003112rRNA 3'-er1/727    | 12/23843 | 0.310422 | 0.732658 | 0.721697 | Eri2      |
| GO_BP_m4GO:003191positive reç1/727  | 12/23843 | 0.310422 | 0.732658 | 0.721697 | Anapc2    |
| GO_BP_m4GO:003282positive reç1/727  | 12/23843 | 0.310422 | 0.732658 | 0.721697 | Gas6      |
| GO_BP_m4GO:003292negative re1/727   | 12/23843 | 0.310422 | 0.732658 | 0.721697 | Fst       |
| GO_BP_m4GO:00330εregulation 1/727   | 12/23843 | 0.310422 | 0.732658 | 0.721697 | Erbp2     |
| GO_BP_m4GO:00349εhistone arc1/727   | 12/23843 | 0.310422 | 0.732658 | 0.721697 | Prmt9     |
| GO_BP_m4GO:003597peptidyl-th1/727   | 12/23843 | 0.310422 | 0.732658 | 0.721697 | Dusp10    |
| GO_BP_m4GO:00423εfat-soluble1/727   | 12/23843 | 0.310422 | 0.732658 | 0.721697 | Vdr       |
| GO_BP_m4GO:004254hemoglobi1/727     | 12/23843 | 0.310422 | 0.732658 | 0.721697 | Inhba     |
| GO_BP_m4GO:00440εpositive reç1/727  | 12/23843 | 0.310422 | 0.732658 | 0.721697 | 5330417C2 |
| GO_BP_m4GO:004507positive reç1/727  | 12/23843 | 0.310422 | 0.732658 | 0.721697 | Il27      |
| GO_BP_m4GO:004541regulation 1/727   | 12/23843 | 0.310422 | 0.732658 | 0.721697 | Bcl10     |
| GO_BP_m4GO:004574positive reç1/727  | 12/23843 | 0.310422 | 0.732658 | 0.721697 | Neur11a   |
| GO_BP_m4GO:00457εpositive reç1/727  | 12/23843 | 0.310422 | 0.732658 | 0.721697 | Tshr      |
| GO_BP_m4GO:004594positive reç1/727  | 12/23843 | 0.310422 | 0.732658 | 0.721697 | Erbp2     |
| GO_BP_m4GO:00459εnegative re1/727   | 12/23843 | 0.310422 | 0.732658 | 0.721697 | Cbap      |
| GO_BP_m4GO:004814astrocyte a1/727   | 12/23843 | 0.310422 | 0.732658 | 0.721697 | Ager      |
| GO_BP_m4GO:004857notochord 1/727    | 12/23843 | 0.310422 | 0.732658 | 0.721697 | Efna1     |
| GO_BP_m4GO:00487εcardiac mu1/727    | 12/23843 | 0.310422 | 0.732658 | 0.721697 | Myom2     |
| GO_BP_m4GO:00517εpositive reç1/727  | 12/23843 | 0.310422 | 0.732658 | 0.721697 | Fst       |
| GO_BP_m4GO:00600εvagina dev1/727    | 12/23843 | 0.310422 | 0.732658 | 0.721697 | Esr2      |
| GO_BP_m4GO:00601Cpositive reç1/727  | 12/23843 | 0.310422 | 0.732658 | 0.721697 | Ager      |
| GO_BP_m4GO:006012positive reç1/727  | 12/23843 | 0.310422 | 0.732658 | 0.721697 | Itsn1     |
| GO_BP_m4GO:006057cell fate sp1/727  | 12/23843 | 0.310422 | 0.732658 | 0.721697 | Nkx6-2    |
| GO_BP_m4GO:00702εpeptidyl-se1/727   | 12/23843 | 0.310422 | 0.732658 | 0.721697 | Ppp1r15b  |
| GO_BP_m4GO:007034fat cell prol1/727 | 12/23843 | 0.310422 | 0.732658 | 0.721697 | Pid1      |
| GO_BP_m4GO:007034regulation 1/727   | 12/23843 | 0.310422 | 0.732658 | 0.721697 | Pid1      |
| GO_BP_m4GO:007042nucleotide·1/727   | 12/23843 | 0.310422 | 0.732658 | 0.721697 | Rela      |
| GO_BP_m4GO:00704εnucleotide·1/727   | 12/23843 | 0.310422 | 0.732658 | 0.721697 | Rela      |
| GO_BP_m4GO:007047uterine sm1/727    | 12/23843 | 0.310422 | 0.732658 | 0.721697 | Lck       |
| GO_BP_m4GO:007057positive reç1/727  | 12/23843 | 0.310422 | 0.732658 | 0.721697 | Rtn4      |
| GO_BP_m4GO:00709εhistone H3 1/727   | 12/23843 | 0.310422 | 0.732658 | 0.721697 | Sfpq      |
| GO_BP_m4GO:00714εcellular res1/727  | 12/23843 | 0.310422 | 0.732658 | 0.721697 | Kcne1     |
| GO_BP_m4GO:00718εcell prolifer1/727 | 12/23843 | 0.310422 | 0.732658 | 0.721697 | Lgals3    |
| GO_BP_m4GO:00718εregulation 1/727   | 12/23843 | 0.310422 | 0.732658 | 0.721697 | Lgals3    |
| GO_BP_m4GO:007211glomerular1/727    | 12/23843 | 0.310422 | 0.732658 | 0.721697 | C3ar1     |
| GO_BP_m4GO:00724εsignal trans1/727  | 12/23843 | 0.310422 | 0.732658 | 0.721697 | Pidd1     |
| GO_BP_m4GO:00989εneurotrans1/727    | 12/23843 | 0.310422 | 0.732658 | 0.721697 | Snap47    |
| GO_BP_m4GO:190184regulation 1/727   | 12/23843 | 0.310422 | 0.732658 | 0.721697 | Rem2      |
| GO_BP_m4GO:19024Cintracellula1/727  | 12/23843 | 0.310422 | 0.732658 | 0.721697 | Pidd1     |
| GO_BP_m4GO:190241protein loc1/727   | 12/23843 | 0.310422 | 0.732658 | 0.721697 | Dsp       |
| GO_BP_m4GO:190271positive reç1/727  | 12/23843 | 0.310422 | 0.732658 | 0.721697 | Mir155    |
| GO_BP_m4GO:19029Cnegative re1/727   | 12/23843 | 0.310422 | 0.732658 | 0.721697 | Sec22b    |
| GO_BP_m4GO:190302regulation 1/727   | 12/23843 | 0.310422 | 0.732658 | 0.721697 | Ddit3     |
| GO_BP_m4GO:190354establishm1/727    | 12/23843 | 0.310422 | 0.732658 | 0.721697 | Snap47    |
| GO_BP_m4GO:190397regulation 1/727   | 12/23843 | 0.310422 | 0.732658 | 0.721697 | Tiam1     |
| GO_BP_m4GO:190447regulation 1/727   | 12/23843 | 0.310422 | 0.732658 | 0.721697 | Apoa4     |

|                   |                    |           |          |          |          |             |
|-------------------|--------------------|-----------|----------|----------|----------|-------------|
| GO_BP_m4GO:190486 | excitatory s1/727  | 12/23843  | 0.310422 | 0.732658 | 0.721697 | Vstm5       |
| GO_BP_m4GO:190515 | positive reç1/727  | 12/23843  | 0.310422 | 0.732658 | 0.721697 | Ager        |
| GO_BP_m4GO:190521 | regulation 1/727   | 12/23843  | 0.310422 | 0.732658 | 0.721697 | Eif3e       |
| GO_BP_m4GO:200062 | regulation 1/727   | 12/23843  | 0.310422 | 0.732658 | 0.721697 | Rela        |
| GO_BP_m4GO:200067 | regulation 1/727   | 12/23843  | 0.310422 | 0.732658 | 0.721697 | Ager        |
| GO_BP_m4GO:007048 | response tr10/727  | 270/23843 | 0.3105   | 0.732658 | 0.721697 | Ager/Fndc:  |
| GO_BP_m4GO:000018 | nuclear-tra2/727   | 37/23843  | 0.312004 | 0.732658 | 0.721697 | Eif3e/Nbas  |
| GO_BP_m4GO:000253 | cytokine pr2/727   | 37/23843  | 0.312004 | 0.732658 | 0.721697 | Mapk14/M    |
| GO_BP_m4GO:000288 | positive reç2/727  | 37/23843  | 0.312004 | 0.732658 | 0.721697 | Il13/Vamp8  |
| GO_BP_m4GO:001076 | regulation 2/727   | 37/23843  | 0.312004 | 0.732658 | 0.721697 | Ager/Slc8a  |
| GO_BP_m4GO:003313 | regulation 2/727   | 37/23843  | 0.312004 | 0.732658 | 0.721697 | lfna12/Ret  |
| GO_BP_m4GO:003820 | TORC1 sigr2/727    | 37/23843  | 0.312004 | 0.732658 | 0.721697 | Akt1s1/Sec  |
| GO_BP_m4GO:004616 | alcohol cat2/727   | 37/23843  | 0.312004 | 0.732658 | 0.721697 | Akr1d1/Cyl  |
| GO_BP_m4GO:004662 | negative re2/727   | 37/23843  | 0.312004 | 0.732658 | 0.721697 | Pid1/Rela   |
| GO_BP_m4GO:005502 | positive reç2/727  | 37/23843  | 0.312004 | 0.732658 | 0.721697 | Mapk14/Pi   |
| GO_BP_m4GO:190106 | guanosine-2/727    | 37/23843  | 0.312004 | 0.732658 | 0.721697 | Ak3/Nme5    |
| GO_BP_m4GO:190262 | positive reç2/727  | 37/23843  | 0.312004 | 0.732658 | 0.721697 | C3ar1/Sell  |
| GO_BP_m4GO:000715 | leukocyte c11/727  | 301/23843 | 0.31307  | 0.7348   | 0.723807 | Ager/Apoa   |
| GO_BP_m4GO:003476 | positive reç6/727  | 151/23843 | 0.31364  | 0.735776 | 0.724768 | Ager/Arc/C  |
| GO_BP_m4GO:000664 | phospholip12/727   | 332/23843 | 0.314973 | 0.738541 | 0.727492 | Apoa4/Gdç   |
| GO_BP_m4GO:004364 | dicarboxyli4/727   | 93/23843  | 0.315332 | 0.739021 | 0.727965 | Acmsd/Fol   |
| GO_BP_m4GO:003227 | regulation 8/727   | 211/23843 | 0.315872 | 0.739133 | 0.728076 | Arhgap18/   |
| GO_BP_m4GO:004521 | cell-cell jur8/727 | 211/23843 | 0.315872 | 0.739133 | 0.728076 | Ccm2/Cdh:   |
| GO_BP_m4GO:000314 | embryonic 3/727    | 65/23843  | 0.318314 | 0.739133 | 0.728076 | Folr1/Ovol: |
| GO_BP_m4GO:190432 | response tr3/727   | 65/23843  | 0.318314 | 0.739133 | 0.728076 | Mir7-2/Mir  |
| GO_BP_m4GO:190432 | cellular resj3/727 | 65/23843  | 0.318314 | 0.739133 | 0.728076 | Mir7-2/Mir  |
| GO_BP_m4GO:005506 | monovalen6/727     | 152/23843 | 0.319003 | 0.739133 | 0.728076 | Atp1b4/Ca   |
| GO_BP_m4GO:004873 | cardiac mu9/727    | 242/23843 | 0.319678 | 0.739133 | 0.728076 | Dsp/Fhl2/N  |
| GO_BP_m4GO:200037 | regulation 7/727   | 182/23843 | 0.320321 | 0.739133 | 0.728076 | Ager/Esr2/  |
| GO_BP_m4GO:004886 | stem cell d8/727   | 212/23843 | 0.320395 | 0.739133 | 0.728076 | Folr1/Mir1! |
| GO_BP_m4GO:003806 | NIK/NF-ka14/727    | 94/23843  | 0.322255 | 0.739133 | 0.728076 | Ager/Rela/  |
| GO_BP_m4GO:000272 | positive reç2/727  | 38/23843  | 0.323296 | 0.739133 | 0.728076 | Ffar3/Mapk  |
| GO_BP_m4GO:000962 | response tr2/727   | 38/23843  | 0.323296 | 0.739133 | 0.728076 | Bcl10/Mpo   |
| GO_BP_m4GO:004408 | regulation 2/727   | 38/23843  | 0.323296 | 0.739133 | 0.728076 | 5330417C2   |
| GO_BP_m4GO:004558 | negative re2/727   | 38/23843  | 0.323296 | 0.739133 | 0.728076 | Erbp2/Socs  |
| GO_BP_m4GO:004688 | regulation 2/727   | 38/23843  | 0.323296 | 0.739133 | 0.728076 | Ffar3/Vdr   |
| GO_BP_m4GO:004879 | calcium ior2/727   | 38/23843  | 0.323296 | 0.739133 | 0.728076 | Rims4/Syt1  |
| GO_BP_m4GO:005148 | positive reç2/727  | 38/23843  | 0.323296 | 0.739133 | 0.728076 | Grm1/Htr2   |
| GO_BP_m4GO:007084 | response tr2/727   | 38/23843  | 0.323296 | 0.739133 | 0.728076 | Erbp2/Zfp3  |
| GO_BP_m4GO:008600 | membrane 2/727     | 38/23843  | 0.323296 | 0.739133 | 0.728076 | Kcne1/Ned   |
| GO_BP_m4GO:190165 | glycosyl co2/727   | 38/23843  | 0.323296 | 0.739133 | 0.728076 | Nme5/Pdcl   |
| GO_BP_m4GO:200000 | regulation 2/727   | 38/23843  | 0.323296 | 0.739133 | 0.728076 | Astn2/Ned   |
| GO_BP_m4GO:002289 | regulation 9/727   | 243/23843 | 0.323912 | 0.739133 | 0.728076 | Ager/Arc/C  |
| GO_BP_m4GO:006032 | cell chemo10/727   | 274/23843 | 0.32641  | 0.739133 | 0.728076 | C3ar1/Defb  |
| GO_BP_m4GO:000154 | ovarian foll3/727  | 66/23843  | 0.326708 | 0.739133 | 0.728076 | Esr2/Inhba. |
| GO_BP_m4GO:001406 | positive reç3/727  | 66/23843  | 0.326708 | 0.739133 | 0.728076 | Erbp2/Hcst  |
| GO_BP_m4GO:003096 | endoplasm3/727     | 66/23843  | 0.326708 | 0.739133 | 0.728076 | Atf6b/Ddit: |
| GO_BP_m4GO:005502 | regulation 3/727   | 66/23843  | 0.326708 | 0.739133 | 0.728076 | Mapk14/M    |

|                               |           |          |          |          |             |
|-------------------------------|-----------|----------|----------|----------|-------------|
| GO_BP_m4GO:006147response to  | 66/23843  | 0.326708 | 0.739133 | 0.728076 | Mir7-2/Mir  |
| GO_BP_m4GO:190372regulation   | 66/23843  | 0.326708 | 0.739133 | 0.728076 | Htr2c/Pik3i |
| GO_BP_m4GO:003021erythrocyte  | 124/23843 | 0.327637 | 0.739133 | 0.728076 | Gata1/Hep   |
| GO_BP_m4GO:003519gene silenc  | 124/23843 | 0.327637 | 0.739133 | 0.728076 | Mir155/Mir  |
| GO_BP_m4GO:000979axis specifi | 95/23843  | 0.329189 | 0.739133 | 0.728076 | Aurka/Ddit  |
| GO_BP_m4GO:003164regulation   | 95/23843  | 0.329189 | 0.739133 | 0.728076 | Grm1/Hcrt   |
| GO_BP_m4GO:004592positive re  | 95/23843  | 0.329189 | 0.739133 | 0.728076 | Cacna1g/C   |
| GO_BP_m4GO:004340negative re  | 154/23843 | 0.32977  | 0.739133 | 0.728076 | Btn2a2/Cnl  |
| GO_BP_m4GO:004846cell matura  | 184/23843 | 0.330145 | 0.739133 | 0.728076 | Aurka/Bfsp  |
| GO_BP_m4GO:000046maturation   | 13/23843  | 0.331458 | 0.739133 | 0.728076 | Rpl7l1      |
| GO_BP_m4GO:000092septin ring  | 13/23843  | 0.331458 | 0.739133 | 0.728076 | 12-Sep      |
| GO_BP_m4GO:000155luteinizatio | 13/23843  | 0.331458 | 0.739133 | 0.728076 | Inhba       |
| GO_BP_m4GO:000256somatic div  | 13/23843  | 0.331458 | 0.739133 | 0.728076 | Polb        |
| GO_BP_m4GO:000317mitral valve | 13/23843  | 0.331458 | 0.739133 | 0.728076 | Efna1       |
| GO_BP_m4GO:000317pulmonary    | 13/23843  | 0.331458 | 0.739133 | 0.728076 | Nfatc1      |
| GO_BP_m4GO:000318pulmonary    | 13/23843  | 0.331458 | 0.739133 | 0.728076 | Nfatc1      |
| GO_BP_m4GO:000626mitochond    | 13/23843  | 0.331458 | 0.739133 | 0.728076 | Pid1        |
| GO_BP_m4GO:000651protein de   | 13/23843  | 0.331458 | 0.739133 | 0.728076 | Aga         |
| GO_BP_m4GO:000710mitotic cen  | 13/23843  | 0.331458 | 0.739133 | 0.728076 | Aurka       |
| GO_BP_m4GO:000750mesoderm     | 13/23843  | 0.331458 | 0.739133 | 0.728076 | Sox17       |
| GO_BP_m4GO:000908methionine   | 13/23843  | 0.331458 | 0.739133 | 0.728076 | Bhmt        |
| GO_BP_m4GO:000943NAD biosyn   | 13/23843  | 0.331458 | 0.739133 | 0.728076 | Kynu        |
| GO_BP_m4GO:001080negative re  | 13/23843  | 0.331458 | 0.739133 | 0.728076 | Gas6        |
| GO_BP_m4GO:001088regulation   | 13/23843  | 0.331458 | 0.739133 | 0.728076 | Slc8a1      |
| GO_BP_m4GO:001099regulation   | 13/23843  | 0.331458 | 0.739133 | 0.728076 | Ppp1r15b    |
| GO_BP_m4GO:001821peptidyl-ar  | 13/23843  | 0.331458 | 0.739133 | 0.728076 | Prmt9       |
| GO_BP_m4GO:002152spinal cord  | 13/23843  | 0.331458 | 0.739133 | 0.728076 | Nkx6-2      |
| GO_BP_m4GO:003057nuclear bo   | 13/23843  | 0.331458 | 0.739133 | 0.728076 | Agap3       |
| GO_BP_m4GO:003103myosin fila  | 13/23843  | 0.331458 | 0.739133 | 0.728076 | Myom2       |
| GO_BP_m4GO:003227regulation   | 13/23843  | 0.331458 | 0.739133 | 0.728076 | Inhba       |
| GO_BP_m4GO:003249response to  | 13/23843  | 0.331458 | 0.739133 | 0.728076 | Rela        |
| GO_BP_m4GO:003307immature     | 13/23843  | 0.331458 | 0.739133 | 0.728076 | ErbB2       |
| GO_BP_m4GO:003369positive re  | 13/23843  | 0.331458 | 0.739133 | 0.728076 | Gata1       |
| GO_BP_m4GO:003406stress gran  | 13/23843  | 0.331458 | 0.739133 | 0.728076 | Grb7        |
| GO_BP_m4GO:003449protein loc  | 13/23843  | 0.331458 | 0.739133 | 0.728076 | Stx17       |
| GO_BP_m4GO:003572intraciliary | 13/23843  | 0.331458 | 0.739133 | 0.728076 | Wdr35       |
| GO_BP_m4GO:003587nucleotide   | 13/23843  | 0.331458 | 0.739133 | 0.728076 | Rela        |
| GO_BP_m4GO:004222interleukin  | 13/23843  | 0.331458 | 0.739133 | 0.728076 | Bcl10       |
| GO_BP_m4GO:004249gamma-de     | 13/23843  | 0.331458 | 0.739133 | 0.728076 | Lck         |
| GO_BP_m4GO:004263positive re  | 13/23843  | 0.331458 | 0.739133 | 0.728076 | Fst         |
| GO_BP_m4GO:004350negative re  | 13/23843  | 0.331458 | 0.739133 | 0.728076 | Dusp10      |
| GO_BP_m4GO:004369reverse ch   | 13/23843  | 0.331458 | 0.739133 | 0.728076 | Apoa4       |
| GO_BP_m4GO:004507regulation   | 13/23843  | 0.331458 | 0.739133 | 0.728076 | Il27        |
| GO_BP_m4GO:004513developme    | 13/23843  | 0.331458 | 0.739133 | 0.728076 | Irf2bpl     |
| GO_BP_m4GO:004562regulation   | 13/23843  | 0.331458 | 0.739133 | 0.728076 | Socs5       |
| GO_BP_m4GO:004647phosphatic   | 13/23843  | 0.331458 | 0.739133 | 0.728076 | Lipc        |
| GO_BP_m4GO:004848enteric ner  | 13/23843  | 0.331458 | 0.739133 | 0.728076 | Ret         |
| GO_BP_m4GO:004875branching    | 13/23843  | 0.331458 | 0.739133 | 0.728076 | Rtn4        |

|                                     |           |          |          |          |             |
|-------------------------------------|-----------|----------|----------|----------|-------------|
| GO_BP_m4GO:006026regulation 1/727   | 13/23843  | 0.331458 | 0.739133 | 0.728076 | Dusp10      |
| GO_BP_m4GO:006028regulation 1/727   | 13/23843  | 0.331458 | 0.739133 | 0.728076 | Aurka       |
| GO_BP_m4GO:006067branching 1/727    | 13/23843  | 0.331458 | 0.739133 | 0.728076 | Grb2        |
| GO_BP_m4GO:006076negative re1/727   | 13/23843  | 0.331458 | 0.739133 | 0.728076 | Esr2        |
| GO_BP_m4GO:006085establishm1/727    | 13/23843  | 0.331458 | 0.739133 | 0.728076 | Abcb1b      |
| GO_BP_m4GO:006091cardiac cell1/727  | 13/23843  | 0.331458 | 0.739133 | 0.728076 | Sox17       |
| GO_BP_m4GO:0061153'-UTR-me1/727     | 13/23843  | 0.331458 | 0.739133 | 0.728076 | Zfp361l     |
| GO_BP_m4GO:007094neutrophil 1/727   | 13/23843  | 0.331458 | 0.739133 | 0.728076 | Dnase1      |
| GO_BP_m4GO:007128cellular res1/727  | 13/23843  | 0.331458 | 0.739133 | 0.728076 | Mt1         |
| GO_BP_m4GO:007221positive re1/727   | 13/23843  | 0.331458 | 0.739133 | 0.728076 | Ret         |
| GO_BP_m4GO:007253fibroblast a1/727  | 13/23843  | 0.331458 | 0.739133 | 0.728076 | Rps6ka1     |
| GO_BP_m4GO:008606AV node c1/727     | 13/23843  | 0.331458 | 0.739133 | 0.728076 | Cacna1g     |
| GO_BP_m4GO:009011cargo load1/727    | 13/23843  | 0.331458 | 0.739133 | 0.728076 | Sec13       |
| GO_BP_m4GO:00905C RNA phos1/727     | 13/23843  | 0.331458 | 0.739133 | 0.728076 | Eri2        |
| GO_BP_m4GO:009701cellular res1/727  | 13/23843  | 0.331458 | 0.739133 | 0.728076 | Mir155      |
| GO_BP_m4GO:009706response tr1/727   | 13/23843  | 0.331458 | 0.739133 | 0.728076 | Gata1       |
| GO_BP_m4GO:009871L-glutamat1/727    | 13/23843  | 0.331458 | 0.739133 | 0.728076 | Slc1a6      |
| GO_BP_m4GO:009873macromole1/727     | 13/23843  | 0.331458 | 0.739133 | 0.728076 | Abhd13      |
| GO_BP_m4GO:009887neurotrans1/727    | 13/23843  | 0.331458 | 0.739133 | 0.728076 | Snap47      |
| GO_BP_m4GO:009891regulation 1/727   | 13/23843  | 0.331458 | 0.739133 | 0.728076 | Dsp         |
| GO_BP_m4GO:190107glucosamir1/727    | 13/23843  | 0.331458 | 0.739133 | 0.728076 | Ctbs        |
| GO_BP_m4GO:190233regulation 1/727   | 13/23843  | 0.331458 | 0.739133 | 0.728076 | Vdr         |
| GO_BP_m4GO:190293positive re1/727   | 13/23843  | 0.331458 | 0.739133 | 0.728076 | Efna1       |
| GO_BP_m4GO:190381positive re1/727   | 13/23843  | 0.331458 | 0.739133 | 0.728076 | Kcne1       |
| GO_BP_m4GO:190492positive re1/727   | 13/23843  | 0.331458 | 0.739133 | 0.728076 | Tomm7       |
| GO_BP_m4GO:190504regulation 1/727   | 13/23843  | 0.331458 | 0.739133 | 0.728076 | Mapk14      |
| GO_BP_m4GO:190587regulation 1/727   | 13/23843  | 0.331458 | 0.739133 | 0.728076 | Aurka       |
| GO_BP_m4GO:200065negative re1/727   | 13/23843  | 0.331458 | 0.739133 | 0.728076 | Nedd4l      |
| GO_BP_m4GO:200122negative re1/727   | 13/23843  | 0.331458 | 0.739133 | 0.728076 | Tnn         |
| GO_BP_m4GO:000317heart valve 2/727  | 39/23843  | 0.334541 | 0.742544 | 0.731435 | Efna1/Nfat  |
| GO_BP_m4GO:000933phospholip2/727    | 39/23843  | 0.334541 | 0.742544 | 0.731435 | Gdpd3/Lip   |
| GO_BP_m4GO:003317calcineurin 2/727  | 39/23843  | 0.334541 | 0.742544 | 0.731435 | Mir1a-2/N   |
| GO_BP_m4GO:003434response tr2/727   | 39/23843  | 0.334541 | 0.742544 | 0.731435 | A230050P2   |
| GO_BP_m4GO:003817neurotropt2/727    | 39/23843  | 0.334541 | 0.742544 | 0.731435 | Akt1s1/Spr  |
| GO_BP_m4GO:004355regulation 2/727   | 39/23843  | 0.334541 | 0.742544 | 0.731435 | Pik3ip1/Tni |
| GO_BP_m4GO:004474protein tra2/727   | 39/23843  | 0.334541 | 0.742544 | 0.731435 | Pex1/Tomr   |
| GO_BP_m4GO:190193toxin trans2/727   | 39/23843  | 0.334541 | 0.742544 | 0.731435 | Rab40b/Ra   |
| GO_BP_m4GO:190317negative re2/727   | 39/23843  | 0.334541 | 0.742544 | 0.731435 | Cbarp/Rerr  |
| GO_BP_m4GO:190357negative re2/727   | 39/23843  | 0.334541 | 0.742544 | 0.731435 | Atf6b/Ppp1  |
| GO_BP_m4GO:001063negative re3/727   | 67/23843  | 0.3351   | 0.742909 | 0.731795 | Ager/Dusp   |
| GO_BP_m4GO:004814positive re3/727   | 67/23843  | 0.3351   | 0.742909 | 0.731795 | Ager/Gas6   |
| GO_BP_m4GO:003104gene silenc6/727   | 155/23843 | 0.335172 | 0.742909 | 0.731795 | Cnot6/Mir1  |
| GO_BP_m4GO:004866positive re4/727   | 96/23843  | 0.336131 | 0.74469  | 0.733549 | Abcc4/Age   |
| GO_BP_m4GO:000593monosaccl9/727     | 246/23843 | 0.336679 | 0.74556  | 0.734406 | Car5a/C1q   |
| GO_BP_m4GO:00330C muscle cell 8/727 | 216/23843 | 0.338604 | 0.746677 | 0.735507 | Abcc4/Age   |
| GO_BP_m4GO:000762locomoton9/727     | 247/23843 | 0.340954 | 0.746677 | 0.735507 | Cacna1b/D   |
| GO_BP_m4GO:004605cAMP met4/727      | 97/23843  | 0.343078 | 0.746677 | 0.735507 | Cap2/Gng1   |
| GO_BP_m4GO:000238mucosal ir3/727    | 68/23843  | 0.343487 | 0.746677 | 0.735507 | Apoa4/AY7   |

|                                     |           |          |          |          |             |
|-------------------------------------|-----------|----------|----------|----------|-------------|
| GO_BP_m4GO:000676vitamin me3/727    | 68/23843  | 0.343487 | 0.746677 | 0.735507 | Folr1/Kynu  |
| GO_BP_m4GO:003023myofibril a3/727   | 68/23843  | 0.343487 | 0.746677 | 0.735507 | Myom2/Ne    |
| GO_BP_m4GO:003248Rab proteir3/727   | 68/23843  | 0.343487 | 0.746677 | 0.735507 | Rab31/Rab   |
| GO_BP_m4GO:004557mast cell a3/727   | 68/23843  | 0.343487 | 0.746677 | 0.735507 | Bcl10/Il13/ |
| GO_BP_m4GO:006104negative re3/727   | 68/23843  | 0.343487 | 0.746677 | 0.735507 | Ager/Dusp   |
| GO_BP_m4GO:009732response tr3/727   | 68/23843  | 0.343487 | 0.746677 | 0.735507 | Ctnna1/Mir  |
| GO_BP_m4GO:014005organelle lr3/727  | 68/23843  | 0.343487 | 0.746677 | 0.735507 | Rab40b/Stb  |
| GO_BP_m4GO:005067regulation 12/727  | 340/23843 | 0.343898 | 0.746677 | 0.735507 | Ager/Cdh3   |
| GO_BP_m4GO:00060Cglucose me7/727    | 187/23843 | 0.344962 | 0.746677 | 0.735507 | Car5a/C1q   |
| GO_BP_m4GO:00017EB cell apop2/727   | 40/23843  | 0.345729 | 0.746677 | 0.735507 | Bcl10/Irs2  |
| GO_BP_m4GO:000602glycosamin2/727    | 40/23843  | 0.345729 | 0.746677 | 0.735507 | Pxylp1/Xylt |
| GO_BP_m4GO:00105Eregulation 2/727   | 40/23843  | 0.345729 | 0.746677 | 0.735507 | Gata1/Pxyl  |
| GO_BP_m4GO:00108Eregulation 2/727   | 40/23843  | 0.345729 | 0.746677 | 0.735507 | Apoc4/Me:   |
| GO_BP_m4GO:003051negative re2/727   | 40/23843  | 0.345729 | 0.746677 | 0.735507 | Rtn4/Rtn4r  |
| GO_BP_m4GO:00308Enegative re2/727   | 40/23843  | 0.345729 | 0.746677 | 0.735507 | Sptan1/Tm   |
| GO_BP_m4GO:004337regulation 2/727   | 40/23843  | 0.345729 | 0.746677 | 0.735507 | Il27/Socs5  |
| GO_BP_m4GO:006042positive re2/727   | 40/23843  | 0.345729 | 0.746677 | 0.735507 | Mapk14/Pi   |
| GO_BP_m4GO:00708Ebicellular ti2/727 | 40/23843  | 0.345729 | 0.746677 | 0.735507 | Nedd4l/Np   |
| GO_BP_m4GO:007154dopaminer2/727     | 40/23843  | 0.345729 | 0.746677 | 0.735507 | Tiam1/Tshr  |
| GO_BP_m4GO:009027regulation 2/727   | 40/23843  | 0.345729 | 0.746677 | 0.735507 | Lgals3/Trpv |
| GO_BP_m4GO:190027regulation 2/727   | 40/23843  | 0.345729 | 0.746677 | 0.735507 | Ager/Arc    |
| GO_BP_m4GO:003502regulation 5/727   | 127/23843 | 0.345758 | 0.746677 | 0.735507 | Arap2/Itsn1 |
| GO_BP_m4GO:00351Eposttranscr5/727   | 127/23843 | 0.345758 | 0.746677 | 0.735507 | Mir155/Mir  |
| GO_BP_m4GO:005067epithelial c14/727 | 403/23843 | 0.347287 | 0.746677 | 0.735507 | Ager/Cdh3   |
| GO_BP_m4GO:00316Ecellular res8/727  | 218/23843 | 0.347767 | 0.746677 | 0.735507 | 5330417C2   |
| GO_BP_m4GO:00230Esignal rele16/727  | 466/23843 | 0.349368 | 0.746677 | 0.735507 | Cacna1b/C   |
| GO_BP_m4GO:00726Eprotein loc9/727   | 249/23843 | 0.349529 | 0.746677 | 0.735507 | Blzf1/Gak/C |
| GO_BP_m4GO:00017Cformation 4/727    | 98/23843  | 0.350029 | 0.746677 | 0.735507 | Dusp2/Inh1  |
| GO_BP_m4GO:000182blastocyst 4/727   | 98/23843  | 0.350029 | 0.746677 | 0.735507 | Ncapg2/Rp   |
| GO_BP_m4GO:00307Eregulation 4/727   | 98/23843  | 0.350029 | 0.746677 | 0.735507 | Cap2/Gng1   |
| GO_BP_m4GO:000181positive re14/727  | 404/23843 | 0.35065  | 0.746677 | 0.735507 | Ager/Bcl10  |
| GO_BP_m4GO:00550Ccardiac mu5/727    | 128/23843 | 0.351813 | 0.746677 | 0.735507 | Fhl2/Myom   |
| GO_BP_m4GO:00714Ecellular res5/727  | 128/23843 | 0.351813 | 0.746677 | 0.735507 | Fndc1/Hp1   |
| GO_BP_m4GO:00001Einactivator1/727   | 14/23843  | 0.351854 | 0.746677 | 0.735507 | Dusp10      |
| GO_BP_m4GO:000177immunolog1/727     | 14/23843  | 0.351854 | 0.746677 | 0.735507 | Lgals3      |
| GO_BP_m4GO:000282negative re1/727   | 14/23843  | 0.351854 | 0.746677 | 0.735507 | Socs5       |
| GO_BP_m4GO:00031Emorphogel1/727     | 14/23843  | 0.351854 | 0.746677 | 0.735507 | Ccm2        |
| GO_BP_m4GO:000657amino-acic1/727    | 14/23843  | 0.351854 | 0.746677 | 0.735507 | Bhmt        |
| GO_BP_m4GO:000717negative re1/727   | 14/23843  | 0.351854 | 0.746677 | 0.735507 | Socs5       |
| GO_BP_m4GO:000914pyrimidine 1/727   | 14/23843  | 0.351854 | 0.746677 | 0.735507 | Nme5        |
| GO_BP_m4GO:00092Edeoxyribor1/727    | 14/23843  | 0.351854 | 0.746677 | 0.735507 | Rrm1        |
| GO_BP_m4GO:00108Cnegative re1/727   | 14/23843  | 0.351854 | 0.746677 | 0.735507 | Spry2       |
| GO_BP_m4GO:00108Eregulation 1/727   | 14/23843  | 0.351854 | 0.746677 | 0.735507 | Apoa4       |
| GO_BP_m4GO:00159Ecoenzyme 1/727     | 14/23843  | 0.351854 | 0.746677 | 0.735507 | Nudt7       |
| GO_BP_m4GO:001632neuron ren1/727    | 14/23843  | 0.351854 | 0.746677 | 0.735507 | Cspg4       |
| GO_BP_m4GO:001654protein aut1/727   | 14/23843  | 0.351854 | 0.746677 | 0.735507 | F12         |
| GO_BP_m4GO:00190Eviral transl1/727  | 14/23843  | 0.351854 | 0.746677 | 0.735507 | Eif3a       |
| GO_BP_m4GO:00219Crostrocaud 1/727   | 14/23843  | 0.351854 | 0.746677 | 0.735507 | Sox17       |

|                   |                    |           |          |          |          |            |
|-------------------|--------------------|-----------|----------|----------|----------|------------|
| GO_BP_m4GO:002198 | adenohypc1/727     | 14/23843  | 0.351854 | 0.746677 | 0.735507 | Duox2      |
| GO_BP_m4GO:003065 | regulation 1/727   | 14/23843  | 0.351854 | 0.746677 | 0.735507 | Vdr        |
| GO_BP_m4GO:003100 | response tr1/727   | 14/23843  | 0.351854 | 0.746677 | 0.735507 | Slc8a1     |
| GO_BP_m4GO:003434 | glial cell ap1/727 | 14/23843  | 0.351854 | 0.746677 | 0.735507 | Gas6       |
| GO_BP_m4GO:003443 | steroid est1/727   | 14/23843  | 0.351854 | 0.746677 | 0.735507 | Apoa4      |
| GO_BP_m4GO:003443 | sterol ester1/727  | 14/23843  | 0.351854 | 0.746677 | 0.735507 | Apoa4      |
| GO_BP_m4GO:003443 | cholesterol1/727   | 14/23843  | 0.351854 | 0.746677 | 0.735507 | Apoa4      |
| GO_BP_m4GO:003475 | iron ion tra1/727  | 14/23843  | 0.351854 | 0.746677 | 0.735507 | Slc25a37   |
| GO_BP_m4GO:003572 | cellular res1/727  | 14/23843  | 0.351854 | 0.746677 | 0.735507 | Rela       |
| GO_BP_m4GO:003627 | response tr1/727   | 14/23843  | 0.351854 | 0.746677 | 0.735507 | Slc8a1     |
| GO_BP_m4GO:004240 | cellular bio1/727  | 14/23843  | 0.351854 | 0.746677 | 0.735507 | Kynu       |
| GO_BP_m4GO:004312 | surfactant l1/727  | 14/23843  | 0.351854 | 0.746677 | 0.735507 | Sftpa1     |
| GO_BP_m4GO:004355 | regulation 1/727   | 14/23843  | 0.351854 | 0.746677 | 0.735507 | Ppp1r15b   |
| GO_BP_m4GO:004560 | negative re1/727   | 14/23843  | 0.351854 | 0.746677 | 0.735507 | Ovol2      |
| GO_BP_m4GO:004570 | negative re1/727   | 14/23843  | 0.351854 | 0.746677 | 0.735507 | Akt1s1     |
| GO_BP_m4GO:004630 | phosphatic1/727    | 14/23843  | 0.351854 | 0.746677 | 0.735507 | Lipc       |
| GO_BP_m4GO:004853 | mucosal-a:1/727    | 14/23843  | 0.351854 | 0.746677 | 0.735507 | Ret        |
| GO_BP_m4GO:004854 | Peyer's pat1/727   | 14/23843  | 0.351854 | 0.746677 | 0.735507 | Ret        |
| GO_BP_m4GO:004867 | positive re1/727   | 14/23843  | 0.351854 | 0.746677 | 0.735507 | Rtn4       |
| GO_BP_m4GO:005066 | homocyste1/727     | 14/23843  | 0.351854 | 0.746677 | 0.735507 | Dpep1      |
| GO_BP_m4GO:005120 | centrosom1/727     | 14/23843  | 0.351854 | 0.746677 | 0.735507 | Aurka      |
| GO_BP_m4GO:005138 | kinetochor1/727    | 14/23843  | 0.351854 | 0.746677 | 0.735507 | Cenps      |
| GO_BP_m4GO:006054 | regulation 1/727   | 14/23843  | 0.351854 | 0.746677 | 0.735507 | Ripk1      |
| GO_BP_m4GO:006062 | regulation 1/727   | 14/23843  | 0.351854 | 0.746677 | 0.735507 | Yipf5      |
| GO_BP_m4GO:006115 | endothelial1/727   | 14/23843  | 0.351854 | 0.746677 | 0.735507 | Ccm2       |
| GO_BP_m4GO:006130 | cardiac net1/727   | 14/23843  | 0.351854 | 0.746677 | 0.735507 | Folr1      |
| GO_BP_m4GO:007030 | lens fiber c1/727  | 14/23843  | 0.351854 | 0.746677 | 0.735507 | Bfsp2      |
| GO_BP_m4GO:007137 | cellular res1/727  | 14/23843  | 0.351854 | 0.746677 | 0.735507 | Inhba      |
| GO_BP_m4GO:007222 | metaneph1/727      | 14/23843  | 0.351854 | 0.746677 | 0.735507 | Ret        |
| GO_BP_m4GO:008606 | bundle of t1/727   | 14/23843  | 0.351854 | 0.746677 | 0.735507 | Dsp        |
| GO_BP_m4GO:009015 | establishm1/727    | 14/23843  | 0.351854 | 0.746677 | 0.735507 | Tomm7      |
| GO_BP_m4GO:009701 | response tr1/727   | 14/23843  | 0.351854 | 0.746677 | 0.735507 | Mir155     |
| GO_BP_m4GO:009715 | GABAergic1/727     | 14/23843  | 0.351854 | 0.746677 | 0.735507 | Inhba      |
| GO_BP_m4GO:190107 | guanosine-1/727    | 14/23843  | 0.351854 | 0.746677 | 0.735507 | Nme5       |
| GO_BP_m4GO:190230 | negative re1/727   | 14/23843  | 0.351854 | 0.746677 | 0.735507 | Nedd4l     |
| GO_BP_m4GO:190474 | regulation 1/727   | 14/23843  | 0.351854 | 0.746677 | 0.735507 | Vdr        |
| GO_BP_m4GO:190492 | regulation 1/727   | 14/23843  | 0.351854 | 0.746677 | 0.735507 | Tomm7      |
| GO_BP_m4GO:200025 | negative re1/727   | 14/23843  | 0.351854 | 0.746677 | 0.735507 | Esr2       |
| GO_BP_m4GO:200065 | positive re1/727   | 14/23843  | 0.351854 | 0.746677 | 0.735507 | Cnksr3     |
| GO_BP_m4GO:200104 | regulation 1/727   | 14/23843  | 0.351854 | 0.746677 | 0.735507 | Ctnna1     |
| GO_BP_m4GO:000225 | organ or ti:3/727  | 69/23843  | 0.351864 | 0.746677 | 0.735507 | Apoa4/AY7  |
| GO_BP_m4GO:000600 | gluconeog:3/727    | 69/23843  | 0.351864 | 0.746677 | 0.735507 | Car5a/C1q  |
| GO_BP_m4GO:000801 | blood circu16/727  | 467/23843 | 0.3525   | 0.747695 | 0.736509 | C3ar1/Cacr |
| GO_BP_m4GO:190300 | positive re:7/727  | 189/23843 | 0.354883 | 0.751271 | 0.740031 | Ager/Bcl10 |
| GO_BP_m4GO:000015 | activation c2/727  | 41/23843  | 0.356856 | 0.751271 | 0.740031 | Grm1/Map   |
| GO_BP_m4GO:001010 | potassium 2/727    | 41/23843  | 0.356856 | 0.751271 | 0.740031 | Atp1b4/Kci |
| GO_BP_m4GO:001067 | negative re2/727   | 41/23843  | 0.356856 | 0.751271 | 0.740031 | C1qtnf12/S |
| GO_BP_m4GO:001070 | positive re:2/727  | 41/23843  | 0.356856 | 0.751271 | 0.740031 | Cnksr3/Ne  |

|                                       |           |          |          |          |             |
|---------------------------------------|-----------|----------|----------|----------|-------------|
| GO_BP_m4GO:003237regulation 2/727     | 41/23843  | 0.356856 | 0.751271 | 0.740031 | Abcb4/Apc   |
| GO_BP_m4GO:003237regulation 2/727     | 41/23843  | 0.356856 | 0.751271 | 0.740031 | Abcb4/Apc   |
| GO_BP_m4GO:003292activin recep2/727   | 41/23843  | 0.356856 | 0.751271 | 0.740031 | Fst/Inhba   |
| GO_BP_m4GO:004592positive recep2/727  | 41/23843  | 0.356856 | 0.751271 | 0.740031 | Apoa4/Irs2  |
| GO_BP_m4GO:005165spindle loc2/727     | 41/23843  | 0.356856 | 0.751271 | 0.740031 | Spdl1/Spry  |
| GO_BP_m4GO:190007negative recep2/727  | 41/23843  | 0.356856 | 0.751271 | 0.740031 | Pid1/Rela   |
| GO_BP_m4GO:003083regulation 6/727     | 159/23843 | 0.356866 | 0.751271 | 0.740031 | Arhgap18/   |
| GO_BP_m4GO:005067regulation 8/727     | 220/23843 | 0.356962 | 0.751271 | 0.740031 | Ager/Btn2a  |
| GO_BP_m4GO:004874muscle fiber3/727    | 70/23843  | 0.36023  | 0.751271 | 0.740031 | Myom2/Sg    |
| GO_BP_m4GO:190188negative recep3/727  | 70/23843  | 0.36023  | 0.751271 | 0.740031 | Nav3/Sptai  |
| GO_BP_m4GO:004327negative recep6/727  | 160/23843 | 0.362307 | 0.751271 | 0.740031 | Cbarp/Hcrt  |
| GO_BP_m4GO:199077protein loc10/727    | 283/23843 | 0.362748 | 0.751271 | 0.740031 | Blzf1/Gak/  |
| GO_BP_m4GO:000635mRNA pro15/727       | 439/23843 | 0.36309  | 0.751271 | 0.740031 | Aurkaip1/E  |
| GO_BP_m4GO:190353positive recep15/727 | 439/23843 | 0.36309  | 0.751271 | 0.740031 | Cacna1b/C   |
| GO_BP_m4GO:000717epidermal 4/727      | 100/23843 | 0.363933 | 0.751271 | 0.740031 | Esr2/Kif16k |
| GO_BP_m4GO:009772sperm mot4/727       | 100/23843 | 0.363933 | 0.751271 | 0.740031 | Catsper2/N  |
| GO_BP_m4GO:190000positive recep4/727  | 100/23843 | 0.363933 | 0.751271 | 0.740031 | Anapc2/Its  |
| GO_BP_m4GO:001644posttranscr5/727     | 130/23843 | 0.363938 | 0.751271 | 0.740031 | Mir155/Mir  |
| GO_BP_m4GO:000301circulatory 16/727   | 471/23843 | 0.365083 | 0.751271 | 0.740031 | C3ar1/Cacr  |
| GO_BP_m4GO:003294regulation 8/727     | 222/23843 | 0.366183 | 0.751271 | 0.740031 | Ager/Btn2a  |
| GO_BP_m4GO:190199regulation 9/727     | 253/23843 | 0.366765 | 0.751271 | 0.740031 | Anp32b/Bt   |
| GO_BP_m4GO:001692protein sur2/727     | 42/23843  | 0.367912 | 0.751271 | 0.740031 | Rela/Ube2i  |
| GO_BP_m4GO:003157spindle che2/727     | 42/23843  | 0.367912 | 0.751271 | 0.740031 | Aurka/Spdl  |
| GO_BP_m4GO:003276regulation 2/727     | 42/23843  | 0.367912 | 0.751271 | 0.740031 | Cdh3/Vdr    |
| GO_BP_m4GO:004246eye photor2/727      | 42/23843  | 0.367912 | 0.751271 | 0.740031 | Cabp4/Gna   |
| GO_BP_m4GO:004250serine pho2/727      | 42/23843  | 0.367912 | 0.751271 | 0.740031 | Ifna12/Ret  |
| GO_BP_m4GO:005091positive chr2/727    | 42/23843  | 0.367912 | 0.751271 | 0.740031 | Ager/Lgals  |
| GO_BP_m4GO:009772calcineurin 2/727    | 42/23843  | 0.367912 | 0.751271 | 0.740031 | Mir1a-2/N   |
| GO_BP_m4GO:190372positive recep2/727  | 42/23843  | 0.367912 | 0.751271 | 0.740031 | Htr2c/Tnfai |
| GO_BP_m4GO:003166cellular res7/727    | 192/23843 | 0.369813 | 0.751271 | 0.740031 | 5330417C2   |
| GO_BP_m4GO:000252acute inflar5/727    | 131/23843 | 0.370004 | 0.751271 | 0.740031 | Dnase1/F1.  |
| GO_BP_m4GO:003434response tr5/727     | 131/23843 | 0.370004 | 0.751271 | 0.740031 | A230050P2   |
| GO_BP_m4GO:000995anterior/pc8/727     | 223/23843 | 0.370801 | 0.751271 | 0.740031 | Arc/Aurka/  |
| GO_BP_m4GO:004326regulation 4/727     | 101/23843 | 0.370881 | 0.751271 | 0.740031 | Ager/Hcrt/  |
| GO_BP_m4GO:200037positive recep4/727  | 101/23843 | 0.370881 | 0.751271 | 0.740031 | Ager/Grb2,  |
| GO_BP_m4GO:000007DNA replic1/727      | 15/23843  | 0.371628 | 0.751271 | 0.740031 | Hus1        |
| GO_BP_m4GO:000021meiotic spi1/727     | 15/23843  | 0.371628 | 0.751271 | 0.740031 | Aurka       |
| GO_BP_m4GO:000029nuclear-tra1/727     | 15/23843  | 0.371628 | 0.751271 | 0.740031 | Cnot6       |
| GO_BP_m4GO:000071resolution 1/727     | 15/23843  | 0.371628 | 0.751271 | 0.740031 | Cenps       |
| GO_BP_m4GO:000072DNA doub1/727        | 15/23843  | 0.371628 | 0.751271 | 0.740031 | Brip1       |
| GO_BP_m4GO:000197renal syste1/727     | 15/23843  | 0.371628 | 0.751271 | 0.740031 | Gas6        |
| GO_BP_m4GO:000273regulation 1/727     | 15/23843  | 0.371628 | 0.751271 | 0.740031 | Mapk14      |
| GO_BP_m4GO:000318heart valve1/727     | 15/23843  | 0.371628 | 0.751271 | 0.740031 | Efna1       |
| GO_BP_m4GO:000612mitochond1/727       | 15/23843  | 0.371628 | 0.751271 | 0.740031 | Cycs        |
| GO_BP_m4GO:000633nucleosom1/727       | 15/23843  | 0.371628 | 0.751271 | 0.740031 | Smarcd2     |
| GO_BP_m4GO:000689Golgi to va1/727     | 15/23843  | 0.371628 | 0.751271 | 0.740031 | Gak         |
| GO_BP_m4GO:000699nuclear poi1/727     | 15/23843  | 0.371628 | 0.751271 | 0.740031 | Rtn4        |
| GO_BP_m4GO:000728sperm axor1/727      | 15/23843  | 0.371628 | 0.751271 | 0.740031 | Neurl1a     |



|                                     |          |          |          |          |          |
|-------------------------------------|----------|----------|----------|----------|----------|
| GO_BP_m4GO:000931amine cata 1/727   | 15/23843 | 0.371628 | 0.751271 | 0.740031 | Kynu     |
| GO_BP_m4GO:001064cell commu 1/727   | 15/23843 | 0.371628 | 0.751271 | 0.740031 | Slc8a1   |
| GO_BP_m4GO:001093macrophag 1/727    | 15/23843 | 0.371628 | 0.751271 | 0.740031 | Gas6     |
| GO_BP_m4GO:001569magnesiun 1/727    | 15/23843 | 0.371628 | 0.751271 | 0.740031 | Nipa2    |
| GO_BP_m4GO:001591peroxisom 1/727    | 15/23843 | 0.371628 | 0.751271 | 0.740031 | Pex1     |
| GO_BP_m4GO:001700antibiotic b 1/727 | 15/23843 | 0.371628 | 0.751271 | 0.740031 | Cyp1a2   |
| GO_BP_m4GO:001802peptidyl-ly 1/727  | 15/23843 | 0.371628 | 0.751271 | 0.740031 | Smyd2    |
| GO_BP_m4GO:001964aerobic ele 1/727  | 15/23843 | 0.371628 | 0.751271 | 0.740031 | Cycs     |
| GO_BP_m4GO:001998translesion 1/727  | 15/23843 | 0.371628 | 0.751271 | 0.740031 | Polk     |
| GO_BP_m4GO:003015pancreatic 1/727   | 15/23843 | 0.371628 | 0.751271 | 0.740031 | Vamp8    |
| GO_BP_m4GO:003032stabilizatio 1/727 | 15/23843 | 0.371628 | 0.751271 | 0.740031 | Kcnk6    |
| GO_BP_m4GO:003073sequesterir 1/727  | 15/23843 | 0.371628 | 0.751271 | 0.740031 | Apoc4    |
| GO_BP_m4GO:003157intra-S DN 1/727   | 15/23843 | 0.371628 | 0.751271 | 0.740031 | Hus1     |
| GO_BP_m4GO:003222regulation 1/727   | 15/23843 | 0.371628 | 0.751271 | 0.740031 | Htr2c    |
| GO_BP_m4GO:003323positive re 1/727  | 15/23843 | 0.371628 | 0.751271 | 0.740031 | Ube2i    |
| GO_BP_m4GO:003469response tr 1/727  | 15/23843 | 0.371628 | 0.751271 | 0.740031 | Inhba    |
| GO_BP_m4GO:004209interferon- 1/727  | 15/23843 | 0.371628 | 0.751271 | 0.740031 | Il27     |
| GO_BP_m4GO:004230negative re 1/727  | 15/23843 | 0.371628 | 0.751271 | 0.740031 | Gas6     |
| GO_BP_m4GO:004235vitamin D r 1/727  | 15/23843 | 0.371628 | 0.751271 | 0.740031 | Vdr      |
| GO_BP_m4GO:004240cristae forn 1/727 | 15/23843 | 0.371628 | 0.751271 | 0.740031 | Chchd6   |
| GO_BP_m4GO:004316ubiquitin-c 1/727  | 15/23843 | 0.371628 | 0.751271 | 0.740031 | Ptpn23   |
| GO_BP_m4GO:004432cellular res 1/727 | 15/23843 | 0.371628 | 0.751271 | 0.740031 | Pid1     |
| GO_BP_m4GO:004482modulator 1/727    | 15/23843 | 0.371628 | 0.751271 | 0.740031 | Ythdc2   |
| GO_BP_m4GO:004529mRNA cis 1/727     | 15/23843 | 0.371628 | 0.751271 | 0.740031 | Snrpc    |
| GO_BP_m4GO:004576positive re 1/727  | 15/23843 | 0.371628 | 0.751271 | 0.740031 | Ffar3    |
| GO_BP_m4GO:004613pyrimidine 1/727   | 15/23843 | 0.371628 | 0.751271 | 0.740031 | Nme5     |
| GO_BP_m4GO:004662positive re 1/727  | 15/23843 | 0.371628 | 0.751271 | 0.740031 | C1qtnf12 |
| GO_BP_m4GO:004871negative re 1/727  | 15/23843 | 0.371628 | 0.751271 | 0.740031 | Dusp10   |
| GO_BP_m4GO:005093induction c 1/727  | 15/23843 | 0.371628 | 0.751271 | 0.740031 | Ager     |
| GO_BP_m4GO:005100regulation 1/727   | 15/23843 | 0.371628 | 0.751271 | 0.740031 | Apoa4    |
| GO_BP_m4GO:005138regulation 1/727   | 15/23843 | 0.371628 | 0.751271 | 0.740031 | Spry2    |
| GO_BP_m4GO:005193L-glutamat 1/727   | 15/23843 | 0.371628 | 0.751271 | 0.740031 | Slc1a6   |
| GO_BP_m4GO:006009regulation 1/727   | 15/23843 | 0.371628 | 0.751271 | 0.740031 | Ager     |
| GO_BP_m4GO:006057intestinal e 1/727 | 15/23843 | 0.371628 | 0.751271 | 0.740031 | Mir7-2   |
| GO_BP_m4GO:006070regulation 1/727   | 15/23843 | 0.371628 | 0.751271 | 0.740031 | Oas2     |
| GO_BP_m4GO:006074epithelial c 1/727 | 15/23843 | 0.371628 | 0.751271 | 0.740031 | Esr2     |
| GO_BP_m4GO:006100negative re 1/727  | 15/23843 | 0.371628 | 0.751271 | 0.740031 | Efna1    |
| GO_BP_m4GO:006102eyelid dev 1/727   | 15/23843 | 0.371628 | 0.751271 | 0.740031 | Inhba    |
| GO_BP_m4GO:006130cardiac net 1/727  | 15/23843 | 0.371628 | 0.751271 | 0.740031 | Folr1    |
| GO_BP_m4GO:007025mucus secr 1/727   | 15/23843 | 0.371628 | 0.751271 | 0.740031 | Vamp8    |
| GO_BP_m4GO:007107regulation 1/727   | 15/23843 | 0.371628 | 0.751271 | 0.740031 | Htr2c    |
| GO_BP_m4GO:007140cellular res 1/727 | 15/23843 | 0.371628 | 0.751271 | 0.740031 | Socs5    |
| GO_BP_m4GO:007163positive re 1/727  | 15/23843 | 0.371628 | 0.751271 | 0.740031 | Lum      |
| GO_BP_m4GO:007210glomerular 1/727   | 15/23843 | 0.371628 | 0.751271 | 0.740031 | C3ar1    |
| GO_BP_m4GO:007218ureter dev 1/727   | 15/23843 | 0.371628 | 0.751271 | 0.740031 | Ret      |
| GO_BP_m4GO:007241signal trans 1/727 | 15/23843 | 0.371628 | 0.751271 | 0.740031 | Pidd1    |
| GO_BP_m4GO:009013epithelial c 1/727 | 15/23843 | 0.371628 | 0.751271 | 0.740031 | Ctnna1   |
| GO_BP_m4GO:009705type B pan 1/727   | 15/23843 | 0.371628 | 0.751271 | 0.740031 | Ager     |

|                                     |           |          |          |          |               |
|-------------------------------------|-----------|----------|----------|----------|---------------|
| GO_BP_m4GO:190045regulation 1/727   | 15/23843  | 0.371628 | 0.751271 | 0.740031 | Ager          |
| GO_BP_m4GO:190152regulation 1/727   | 15/23843  | 0.371628 | 0.751271 | 0.740031 | Tomm7         |
| GO_BP_m4GO:190172regulation 1/727   | 15/23843  | 0.371628 | 0.751271 | 0.740031 | C3ar1         |
| GO_BP_m4GO:190240signal trans1/727  | 15/23843  | 0.371628 | 0.751271 | 0.740031 | Pidd1         |
| GO_BP_m4GO:190240signal trans1/727  | 15/23843  | 0.371628 | 0.751271 | 0.740031 | Pidd1         |
| GO_BP_m4GO:190396negative re1/727   | 15/23843  | 0.371628 | 0.751271 | 0.740031 | Irs2          |
| GO_BP_m4GO:190459negative re1/727   | 15/23843  | 0.371628 | 0.751271 | 0.740031 | Gas6          |
| GO_BP_m4GO:199000amyloid fib1/727   | 15/23843  | 0.371628 | 0.751271 | 0.740031 | Ripk1         |
| GO_BP_m4GO:200047regulation 1/727   | 15/23843  | 0.371628 | 0.751271 | 0.740031 | Npffr2        |
| GO_BP_m4GO:200127positive re1/727   | 15/23843  | 0.371628 | 0.751271 | 0.740031 | Ffar3         |
| GO_BP_m4GO:003087mammary 6/727      | 162/23843 | 0.3732   | 0.75413  | 0.742848 | Irs2/Neurl1   |
| GO_BP_m4GO:000166response to7/727   | 193/23843 | 0.374799 | 0.756443 | 0.745127 | Ager/Fndc1    |
| GO_BP_m4GO:000726Rho protei7/727    | 193/23843 | 0.374799 | 0.756443 | 0.745127 | Arap2/Arhgef1 |
| GO_BP_m4GO:002240positive re8/727   | 224/23843 | 0.375424 | 0.756443 | 0.745127 | Ager/Bcl10    |
| GO_BP_m4GO:000616purine nuc15/727   | 443/23843 | 0.37618  | 0.756443 | 0.745127 | Ak3/Atp5c1    |
| GO_BP_m4GO:001485striated m3/727    | 72/23843  | 0.376908 | 0.756443 | 0.745127 | Mapk14/Mir145 |
| GO_BP_m4GO:001931hexose bio3/727    | 72/23843  | 0.376908 | 0.756443 | 0.745127 | Car5a/C1q     |
| GO_BP_m4GO:004427sulfur com3/727    | 72/23843  | 0.376908 | 0.756443 | 0.745127 | Bhmt/Pdhx     |
| GO_BP_m4GO:190320regulation 3/727   | 72/23843  | 0.376908 | 0.756443 | 0.745127 | Nme5/Ripk1    |
| GO_BP_m4GO:003004actin filame4/727  | 102/23843 | 0.377823 | 0.756443 | 0.745127 | Cacna1g/D     |
| GO_BP_m4GO:190401epithelial c4/727  | 102/23843 | 0.377823 | 0.756443 | 0.745127 | Ager/Gas6     |
| GO_BP_m4GO:005076negative re11/727  | 318/23843 | 0.378121 | 0.756443 | 0.745127 | Cspg4/Ctnn1   |
| GO_BP_m4GO:000182blastocyst 12/727  | 43/23843  | 0.378894 | 0.756443 | 0.745127 | Rpl711/Sox1   |
| GO_BP_m4GO:000325regulation 2/727   | 43/23843  | 0.378894 | 0.756443 | 0.745127 | Cacna1g/N     |
| GO_BP_m4GO:000604amino sug2/727     | 43/23843  | 0.378894 | 0.756443 | 0.745127 | Ctbs/Mdp1     |
| GO_BP_m4GO:001025NADH deh2/727      | 43/23843  | 0.378894 | 0.756443 | 0.745127 | Ndufb10/N     |
| GO_BP_m4GO:003298mitochond 2/727    | 43/23843  | 0.378894 | 0.756443 | 0.745127 | Ndufb10/N     |
| GO_BP_m4GO:004510intermedia2/727    | 43/23843  | 0.378894 | 0.756443 | 0.745127 | Bfsp2/Dsp     |
| GO_BP_m4GO:004682regulation 2/727   | 43/23843  | 0.378894 | 0.756443 | 0.745127 | Gas6/Thoc     |
| GO_BP_m4GO:004885brain morp2/727    | 43/23843  | 0.378894 | 0.756443 | 0.745127 | Duox2/Gak     |
| GO_BP_m4GO:005091detection c2/727   | 43/23843  | 0.378894 | 0.756443 | 0.745127 | Olfir850/Olf  |
| GO_BP_m4GO:009031negative re2/727   | 43/23843  | 0.378894 | 0.756443 | 0.745127 | Gas6/Kcne1    |
| GO_BP_m4GO:005095sensory pe10/727   | 287/23843 | 0.379068 | 0.756443 | 0.745127 | Mir16-2/M     |
| GO_BP_m4GO:003134negative re7/727   | 194/23843 | 0.379789 | 0.756443 | 0.745127 | Cspg4/Dgu     |
| GO_BP_m4GO:009031positive re7/727   | 194/23843 | 0.379789 | 0.756443 | 0.745127 | Erbp2/Gas6    |
| GO_BP_m4GO:001714negative re8/727   | 225/23843 | 0.380052 | 0.756443 | 0.745127 | Grb7/Mir15    |
| GO_BP_m4GO:005109positive re8/727   | 225/23843 | 0.380052 | 0.756443 | 0.745127 | Ager/Bcl10    |
| GO_BP_m4GO:004477mitotic cell12/727 | 350/23843 | 0.380689 | 0.756443 | 0.745127 | Anp32b/Bt     |
| GO_BP_m4GO:004212regulation 6/727   | 164/23843 | 0.384103 | 0.756443 | 0.745127 | Ager/Btn2a    |
| GO_BP_m4GO:001407response to4/727   | 103/23843 | 0.384758 | 0.756443 | 0.745127 | Duox2/Sell    |
| GO_BP_m4GO:001895phenol-coi4/727    | 103/23843 | 0.384758 | 0.756443 | 0.745127 | Cdh3/Duox     |
| GO_BP_m4GO:003051regulation 4/727   | 103/23843 | 0.384758 | 0.756443 | 0.745127 | Anapc2/Rtn    |
| GO_BP_m4GO:000334cilium mov3/727    | 73/23843  | 0.385214 | 0.756443 | 0.745127 | Ccdc114/N     |
| GO_BP_m4GO:002240membrane 3/727     | 73/23843  | 0.385214 | 0.756443 | 0.745127 | Rab40b/St     |
| GO_BP_m4GO:006042regulation 3/727   | 73/23843  | 0.385214 | 0.756443 | 0.745127 | Mapk14/M      |
| GO_BP_m4GO:190137regulation 3/727   | 73/23843  | 0.385214 | 0.756443 | 0.745127 | Ager/Kcne1    |
| GO_BP_m4GO:000910glycoprote11/727   | 320/23843 | 0.38589  | 0.756443 | 0.745127 | Aga/B3gnt     |
| GO_BP_m4GO:007132cellular res5/727  | 134/23843 | 0.388199 | 0.756443 | 0.745127 | Ager/C1q      |

|                                      |           |          |          |          |             |
|--------------------------------------|-----------|----------|----------|----------|-------------|
| GO_BP_m4GO:200014negative re9/727    | 258/23843 | 0.388425 | 0.756443 | 0.745127 | Ager/Ctnna  |
| GO_BP_m4GO:001097negative re6/727    | 165/23843 | 0.389556 | 0.756443 | 0.745127 | Cspg4/Dgu   |
| GO_BP_m4GO:004851spermatid 6/727     | 165/23843 | 0.389556 | 0.756443 | 0.745127 | Brip1/Catsp |
| GO_BP_m4GO:000821regulation 7/727    | 196/23843 | 0.389774 | 0.756443 | 0.745127 | C3ar1/Cacr  |
| GO_BP_m4GO:00027Cnegative re2/727    | 44/23843  | 0.389795 | 0.756443 | 0.745127 | Muc4/Serp   |
| GO_BP_m4GO:00427Eeating beh.2/727    | 44/23843  | 0.389795 | 0.756443 | 0.745127 | Hcrt/Uchl3  |
| GO_BP_m4GO:00430Eregulation 2/727    | 44/23843  | 0.389795 | 0.756443 | 0.745127 | Ager/Il13   |
| GO_BP_m4GO:00432Epositive reç2/727   | 44/23843  | 0.389795 | 0.756443 | 0.745127 | Ager/Kcne:  |
| GO_BP_m4GO:00451Cintermedia 2/727    | 44/23843  | 0.389795 | 0.756443 | 0.745127 | Bfsp2/Dsp   |
| GO_BP_m4GO:00513Epositive reç2/727   | 44/23843  | 0.389795 | 0.756443 | 0.745127 | Cdh3/Vdr    |
| GO_BP_m4GO:00901Epositive reç2/727   | 44/23843  | 0.389795 | 0.756443 | 0.745127 | C3ar1/Ret   |
| GO_BP_m4GO:00902Cregulation 2/727    | 44/23843  | 0.389795 | 0.756443 | 0.745127 | Apoa4/Sik1  |
| GO_BP_m4GO:00000E sulfur amin1/727   | 16/23843  | 0.3908   | 0.756443 | 0.745127 | Bhmt        |
| GO_BP_m4GO:000171endoderm:1/727      | 16/23843  | 0.3908   | 0.756443 | 0.745127 | Sox17       |
| GO_BP_m4GO:00018Ehistamine ε1/727    | 16/23843  | 0.3908   | 0.756443 | 0.745127 | Vamp8       |
| GO_BP_m4GO:00018Einner cell n1/727   | 16/23843  | 0.3908   | 0.756443 | 0.745127 | Ncapg2      |
| GO_BP_m4GO:00022Eneutrophil 1/727    | 16/23843  | 0.3908   | 0.756443 | 0.745127 | Dnase1      |
| GO_BP_m4GO:00031Ecardiac cor1/727    | 16/23843  | 0.3908   | 0.756443 | 0.745127 | Mir1a-2     |
| GO_BP_m4GO:00063C apoptotic 1/727    | 16/23843  | 0.3908   | 0.756443 | 0.745127 | Dnase2b     |
| GO_BP_m4GO:00063Eregulation 1/727    | 16/23843  | 0.3908   | 0.756443 | 0.745127 | Erbp2       |
| GO_BP_m4GO:000674ubiquinone1/727     | 16/23843  | 0.3908   | 0.756443 | 0.745127 | Coq6        |
| GO_BP_m4GO:00068EGolgi to en1/727    | 16/23843  | 0.3908   | 0.756443 | 0.745127 | Kif16b      |
| GO_BP_m4GO:000721G-protein 1/727     | 16/23843  | 0.3908   | 0.756443 | 0.745127 | Grm1        |
| GO_BP_m4GO:00072E activation c1/727  | 16/23843  | 0.3908   | 0.756443 | 0.745127 | Traf4       |
| GO_BP_m4GO:00092Epyrimidine 1/727    | 16/23843  | 0.3908   | 0.756443 | 0.745127 | Nme5        |
| GO_BP_m4GO:001404regulation 1/727    | 16/23843  | 0.3908   | 0.756443 | 0.745127 | Ret         |
| GO_BP_m4GO:00217E striatum de1/727   | 16/23843  | 0.3908   | 0.756443 | 0.745127 | Inhba       |
| GO_BP_m4GO:00311C septin ring 1/727  | 16/23843  | 0.3908   | 0.756443 | 0.745127 | 12-Sep      |
| GO_BP_m4GO:00321E septin cyto 1/727  | 16/23843  | 0.3908   | 0.756443 | 0.745127 | 12-Sep      |
| GO_BP_m4GO:00322E positive reç1/727  | 16/23843  | 0.3908   | 0.756443 | 0.745127 | Car2        |
| GO_BP_m4GO:003231prostaglan1/727     | 16/23843  | 0.3908   | 0.756443 | 0.745127 | Abcc4       |
| GO_BP_m4GO:003251positive reç1/727   | 16/23843  | 0.3908   | 0.756443 | 0.745127 | Ppp1r15b    |
| GO_BP_m4GO:00336E positive reç1/727  | 16/23843  | 0.3908   | 0.756443 | 0.745127 | Ret         |
| GO_BP_m4GO:00343E lipid particl1/727 | 16/23843  | 0.3908   | 0.756443 | 0.745127 | Ppid        |
| GO_BP_m4GO:003511genitalia m1/727    | 16/23843  | 0.3908   | 0.756443 | 0.745127 | Ror2        |
| GO_BP_m4GO:00352E ionotropic 1/727   | 16/23843  | 0.3908   | 0.756443 | 0.745127 | Tiam1       |
| GO_BP_m4GO:00357E response tr1/727   | 16/23843  | 0.3908   | 0.756443 | 0.745127 | Rela        |
| GO_BP_m4GO:004264anagen 1/727        | 16/23843  | 0.3908   | 0.756443 | 0.745127 | Mreg        |
| GO_BP_m4GO:00440E modulator1/727     | 16/23843  | 0.3908   | 0.756443 | 0.745127 | Serpinb9    |
| GO_BP_m4GO:00444C adhesion o1/727    | 16/23843  | 0.3908   | 0.756443 | 0.745127 | Gas6        |
| GO_BP_m4GO:004501negative re1/727    | 16/23843  | 0.3908   | 0.756443 | 0.745127 | Wdr35       |
| GO_BP_m4GO:00457E positive reç1/727  | 16/23843  | 0.3908   | 0.756443 | 0.745127 | Irs2        |
| GO_BP_m4GO:004654retinal con1/727    | 16/23843  | 0.3908   | 0.756443 | 0.745127 | Cabp4       |
| GO_BP_m4GO:00466E gamma-de1/727      | 16/23843  | 0.3908   | 0.756443 | 0.745127 | Lck         |
| GO_BP_m4GO:00469E pore comp1/727     | 16/23843  | 0.3908   | 0.756443 | 0.745127 | Rtn4        |
| GO_BP_m4GO:004807regulation 1/727    | 16/23843  | 0.3908   | 0.756443 | 0.745127 | Zeb2        |
| GO_BP_m4GO:004871positive reç1/727   | 16/23843  | 0.3908   | 0.756443 | 0.745127 | Ager        |
| GO_BP_m4GO:004887chemical h1/727     | 16/23843  | 0.3908   | 0.756443 | 0.745127 | Sftpa1      |

|                   |              |        |           |          |          |          |             |
|-------------------|--------------|--------|-----------|----------|----------|----------|-------------|
| GO_BP_m4GO:005112 | positive re  | 1/727  | 16/23843  | 0.3908   | 0.756443 | 0.745127 | Wipf2       |
| GO_BP_m4GO:006004 | negative re  | 1/727  | 16/23843  | 0.3908   | 0.756443 | 0.745127 | Mir1a-2     |
| GO_BP_m4GO:006057 | ventral spir | 1/727  | 16/23843  | 0.3908   | 0.756443 | 0.745127 | Nkx6-2      |
| GO_BP_m4GO:006058 | cell fate co | 1/727  | 16/23843  | 0.3908   | 0.756443 | 0.745127 | Nkx6-2      |
| GO_BP_m4GO:007148 | cellular res | 1/727  | 16/23843  | 0.3908   | 0.756443 | 0.745127 | Socs5       |
| GO_BP_m4GO:008601 | membrane     | 1/727  | 16/23843  | 0.3908   | 0.756443 | 0.745127 | Kcne1       |
| GO_BP_m4GO:009708 | craniofacia  | 1/727  | 16/23843  | 0.3908   | 0.756443 | 0.745127 | Fgf4        |
| GO_BP_m4GO:009728 | iron ion im  | 1/727  | 16/23843  | 0.3908   | 0.756443 | 0.745127 | Slc25a37    |
| GO_BP_m4GO:190015 | regulation   | 1/727  | 16/23843  | 0.3908   | 0.756443 | 0.745127 | Zfp3611     |
| GO_BP_m4GO:190015 | positive re  | 1/727  | 16/23843  | 0.3908   | 0.756443 | 0.745127 | Zfp3611     |
| GO_BP_m4GO:190166 | quinone bi   | 1/727  | 16/23843  | 0.3908   | 0.756443 | 0.745127 | Coq6        |
| GO_BP_m4GO:190218 | positive re  | 1/727  | 16/23843  | 0.3908   | 0.756443 | 0.745127 | Zfp72       |
| GO_BP_m4GO:190271 | regulation   | 1/727  | 16/23843  | 0.3908   | 0.756443 | 0.745127 | Mir155      |
| GO_BP_m4GO:190353 | protein loc  | 1/727  | 16/23843  | 0.3908   | 0.756443 | 0.745127 | Snap47      |
| GO_BP_m4GO:190440 | negative re  | 1/727  | 16/23843  | 0.3908   | 0.756443 | 0.745127 | Wdr35       |
| GO_BP_m4GO:190515 | regulation   | 1/727  | 16/23843  | 0.3908   | 0.756443 | 0.745127 | Ager        |
| GO_BP_m4GO:200010 | negative re  | 1/727  | 16/23843  | 0.3908   | 0.756443 | 0.745127 | Pid1        |
| GO_BP_m4GO:200038 | regulation   | 1/727  | 16/23843  | 0.3908   | 0.756443 | 0.745127 | Sox17       |
| GO_BP_m4GO:200117 | negative re  | 1/727  | 16/23843  | 0.3908   | 0.756443 | 0.745127 | Pid1        |
| GO_BP_m4GO:000913 | nucleoside   | 4/727  | 104/23843 | 0.391684 | 0.75754  | 0.746207 | Ak3/Nme5    |
| GO_BP_m4GO:009778 | negative re  | 4/727  | 104/23843 | 0.391684 | 0.75754  | 0.746207 | Cacna1g/H   |
| GO_BP_m4GO:000697 | response tr  | 13/727 | 385/23843 | 0.393471 | 0.76012  | 0.748748 | Agap3/Apc   |
| GO_BP_m4GO:000988 | positive re  | 13/727 | 385/23843 | 0.393471 | 0.76012  | 0.748748 | 5330417C2   |
| GO_BP_m4GO:007167 | mononucle    | 3/727  | 74/23843  | 0.393495 | 0.76012  | 0.748748 | C3ar1/Lgal  |
| GO_BP_m4GO:003410 | erythrocyte  | 5/727  | 135/23843 | 0.394259 | 0.760981 | 0.749597 | Gata1/Hep   |
| GO_BP_m4GO:009950 | synaptic ve  | 5/727  | 135/23843 | 0.394259 | 0.760981 | 0.749597 | Rims4/Slc1  |
| GO_BP_m4GO:190304 | meiotic cel  | 7/727  | 197/23843 | 0.394769 | 0.761456 | 0.750064 | Cenps/Aurl  |
| GO_BP_m4GO:001605 | Wnt signali  | 14/727 | 417/23843 | 0.394823 | 0.761456 | 0.750064 | Cdh3/Ddit3  |
| GO_BP_m4GO:004390 | positive re  | 6/727  | 166/23843 | 0.395007 | 0.761504 | 0.750111 | Aurka/Inhbc |
| GO_BP_m4GO:003298 | protein-co   | 7/727  | 198/23843 | 0.399763 | 0.767302 | 0.755823 | Gak/Nav3/   |
| GO_BP_m4GO:007250 | divalent inc | 16/727 | 482/23843 | 0.400026 | 0.767302 | 0.755823 | Ager/C3ar1  |
| GO_BP_m4GO:007233 | signal trans | 5/727  | 136/23843 | 0.400313 | 0.767302 | 0.755823 | Phlda3/Pid  |
| GO_BP_m4GO:000801 | regulation   | 6/727  | 167/23843 | 0.400457 | 0.767302 | 0.755823 | Cacna1b/C   |
| GO_BP_m4GO:007123 | cellular res | 6/727  | 167/23843 | 0.400457 | 0.767302 | 0.755823 | Mir155/Mir  |
| GO_BP_m4GO:000611 | regulation   | 2/727  | 45/23843  | 0.400609 | 0.767302 | 0.755823 | C1qtnf12/S  |
| GO_BP_m4GO:000863 | intrinsic ap | 2/727  | 45/23843  | 0.400609 | 0.767302 | 0.755823 | Nme5/Sfpc   |
| GO_BP_m4GO:001922 | neuronal a   | 2/727  | 45/23843  | 0.400609 | 0.767302 | 0.755823 | Cacna1g/C   |
| GO_BP_m4GO:003271 | negative re  | 2/727  | 45/23843  | 0.400609 | 0.767302 | 0.755823 | Gas6/Socs5  |
| GO_BP_m4GO:004208 | T-helper 1   | 2/727  | 45/23843  | 0.400609 | 0.767302 | 0.755823 | Il27/Socs5  |
| GO_BP_m4GO:004591 | negative re  | 2/727  | 45/23843  | 0.400609 | 0.767302 | 0.755823 | C1qtnf12/S  |
| GO_BP_m4GO:006195 | establishm   | 2/727  | 45/23843  | 0.400609 | 0.767302 | 0.755823 | Blzf1/Rab3  |
| GO_BP_m4GO:190262 | regulation   | 2/727  | 45/23843  | 0.400609 | 0.767302 | 0.755823 | C3ar1/Sell  |
| GO_BP_m4GO:190301 | regulation   | 2/727  | 45/23843  | 0.400609 | 0.767302 | 0.755823 | Gata1/Pxyl  |
| GO_BP_m4GO:009887 | vesicle-me   | 3/727  | 75/23843  | 0.401746 | 0.767302 | 0.755823 | Blzf1/Rab3  |
| GO_BP_m4GO:000269 | regulation   | 12/727 | 356/23843 | 0.402968 | 0.767302 | 0.755823 | Ager/Dnas   |
| GO_BP_m4GO:003433 | cell junctio | 8/727  | 230/23843 | 0.403221 | 0.767302 | 0.755823 | Ccm2/Cdh1   |
| GO_BP_m4GO:007066 | regulation   | 8/727  | 230/23843 | 0.403221 | 0.767302 | 0.755823 | Ager/Btn2a  |
| GO_BP_m4GO:004592 | positive re  | 10/727 | 293/23843 | 0.403655 | 0.767302 | 0.755823 | Anapc2/Erl  |

|                   |                                         |           |          |          |          |             |
|-------------------|-----------------------------------------|-----------|----------|----------|----------|-------------|
| GO_BP_m4GO:000815 | actin polymerization                    | 199/23843 | 0.404757 | 0.767302 | 0.755823 | Arhgap18/   |
| GO_BP_m4GO:003472 | nucleosome assembly                     | 137/23843 | 0.406361 | 0.767302 | 0.755823 | Anp32b/Hif1 |
| GO_BP_m4GO:190595 | regulation of gene expression           | 137/23843 | 0.406361 | 0.767302 | 0.755823 | Abcb4/Apc   |
| GO_BP_m4GO:000182 | serotonin signaling                     | 17/23843  | 0.409388 | 0.767302 | 0.755823 | Lgals3      |
| GO_BP_m4GO:000608 | acetyl-CoA catabolic process            | 17/23843  | 0.409388 | 0.767302 | 0.755823 | Pdhx        |
| GO_BP_m4GO:000662 | protein targeting                       | 17/23843  | 0.409388 | 0.767302 | 0.755823 | Pex1        |
| GO_BP_m4GO:000674 | ubiquinol biosynthetic process          | 17/23843  | 0.409388 | 0.767302 | 0.755823 | Coq6        |
| GO_BP_m4GO:000696 | cellular defense                        | 17/23843  | 0.409388 | 0.767302 | 0.755823 | Bcl10       |
| GO_BP_m4GO:000910 | coenzyme C12 biosynthetic process       | 17/23843  | 0.409388 | 0.767302 | 0.755823 | Nudt7       |
| GO_BP_m4GO:001076 | negative regulation of cell growth      | 17/23843  | 0.409388 | 0.767302 | 0.755823 | Nedd4l      |
| GO_BP_m4GO:001405 | gamma-aminobutyrate metabolic process   | 17/23843  | 0.409388 | 0.767302 | 0.755823 | Htr2c       |
| GO_BP_m4GO:003149 | chromatin organization                  | 17/23843  | 0.409388 | 0.767302 | 0.755823 | Smarcd2     |
| GO_BP_m4GO:003162 | synaptic vesicle transport              | 17/23843  | 0.409388 | 0.767302 | 0.755823 | Snap47      |
| GO_BP_m4GO:003250 | endosome maturation                     | 17/23843  | 0.409388 | 0.767302 | 0.755823 | Rilp        |
| GO_BP_m4GO:003298 | protein-DNA complex assembly            | 17/23843  | 0.409388 | 0.767302 | 0.755823 | Smarcd2     |
| GO_BP_m4GO:003315 | V(D)J recombination                     | 17/23843  | 0.409388 | 0.767302 | 0.755823 | Polb        |
| GO_BP_m4GO:003319 | response to hypoxia                     | 17/23843  | 0.409388 | 0.767302 | 0.755823 | Apoa4       |
| GO_BP_m4GO:003606 | glycosylation                           | 17/23843  | 0.409388 | 0.767302 | 0.755823 | Fut1        |
| GO_BP_m4GO:004207 | cell migration                          | 17/23843  | 0.409388 | 0.767302 | 0.755823 | Sox17       |
| GO_BP_m4GO:004215 | lipoprotein transport                   | 17/23843  | 0.409388 | 0.767302 | 0.755823 | Abhd13      |
| GO_BP_m4GO:004265 | regulation of gene expression           | 17/23843  | 0.409388 | 0.767302 | 0.755823 | Sox17       |
| GO_BP_m4GO:004267 | retinal cone cell development           | 17/23843  | 0.409388 | 0.767302 | 0.755823 | Cabp4       |
| GO_BP_m4GO:004275 | negative regulation of cell growth      | 17/23843  | 0.409388 | 0.767302 | 0.755823 | Sfpq        |
| GO_BP_m4GO:004357 | peroxisome organization                 | 17/23843  | 0.409388 | 0.767302 | 0.755823 | Pex1        |
| GO_BP_m4GO:004432 | response to hypoxia                     | 17/23843  | 0.409388 | 0.767302 | 0.755823 | Pid1        |
| GO_BP_m4GO:004506 | T-helper 2 cell differentiation         | 17/23843  | 0.409388 | 0.767302 | 0.755823 | Socs5       |
| GO_BP_m4GO:004579 | positive regulation of cell growth      | 17/23843  | 0.409388 | 0.767302 | 0.755823 | Ret         |
| GO_BP_m4GO:004613 | pyrimidine nucleoside metabolic process | 17/23843  | 0.409388 | 0.767302 | 0.755823 | Nme5        |
| GO_BP_m4GO:004634 | amino sugar metabolic process           | 17/23843  | 0.409388 | 0.767302 | 0.755823 | Ctbs        |
| GO_BP_m4GO:004819 | vesicle targeting                       | 17/23843  | 0.409388 | 0.767302 | 0.755823 | Tmed10      |
| GO_BP_m4GO:005501 | ventricular septum development          | 17/23843  | 0.409388 | 0.767302 | 0.755823 | Fhl2        |
| GO_BP_m4GO:006008 | membrane organization                   | 17/23843  | 0.409388 | 0.767302 | 0.755823 | Kctd7       |
| GO_BP_m4GO:006097 | cell migration                          | 17/23843  | 0.409388 | 0.767302 | 0.755823 | Folr1       |
| GO_BP_m4GO:007024 | regulation of gene expression           | 17/23843  | 0.409388 | 0.767302 | 0.755823 | Efna1       |
| GO_BP_m4GO:007082 | heterochromatin silencing               | 17/23843  | 0.409388 | 0.767302 | 0.755823 | Hp1bp3      |
| GO_BP_m4GO:007178 | endoplasmic reticulum protein import    | 17/23843  | 0.409388 | 0.767302 | 0.755823 | Rtn4        |
| GO_BP_m4GO:007266 | protein localization                    | 17/23843  | 0.409388 | 0.767302 | 0.755823 | Pex1        |
| GO_BP_m4GO:007268 | establishment of protein localization   | 17/23843  | 0.409388 | 0.767302 | 0.755823 | Pex1        |
| GO_BP_m4GO:008601 | membrane organization                   | 17/23843  | 0.409388 | 0.767302 | 0.755823 | Cacna1g     |
| GO_BP_m4GO:009023 | regulation of gene expression           | 17/23843  | 0.409388 | 0.767302 | 0.755823 | Aurka       |
| GO_BP_m4GO:009950 | vesicle fusion                          | 17/23843  | 0.409388 | 0.767302 | 0.755823 | Snap47      |
| GO_BP_m4GO:190217 | negative regulation of cell growth      | 17/23843  | 0.409388 | 0.767302 | 0.755823 | Nme5        |
| GO_BP_m4GO:190225 | regulation of gene expression           | 17/23843  | 0.409388 | 0.767302 | 0.755823 | Kcne1       |
| GO_BP_m4GO:190291 | regulation of gene expression           | 17/23843  | 0.409388 | 0.767302 | 0.755823 | Trip12      |
| GO_BP_m4GO:190359 | positive regulation of cell growth      | 17/23843  | 0.409388 | 0.767302 | 0.755823 | Tomm7       |
| GO_BP_m4GO:200000 | regulation of gene expression           | 17/23843  | 0.409388 | 0.767302 | 0.755823 | Thoc5       |
| GO_BP_m4GO:200035 | positive regulation of cell growth      | 17/23843  | 0.409388 | 0.767302 | 0.755823 | Ager        |
| GO_BP_m4GO:200064 | regulation of gene expression           | 17/23843  | 0.409388 | 0.767302 | 0.755823 | Ptpn23      |

|                                      |           |          |          |          |              |
|--------------------------------------|-----------|----------|----------|----------|--------------|
| GO_BP_m4GO:200077negative re1/727    | 17/23843  | 0.409388 | 0.767302 | 0.755823 | Rbl1         |
| GO_BP_m4GO:000683dicarboxyli3/727    | 76/23843  | 0.409964 | 0.767302 | 0.755823 | Folr1/Slc17  |
| GO_BP_m4GO:004352positive re3/727    | 76/23843  | 0.409964 | 0.767302 | 0.755823 | Ager/Ddit3   |
| GO_BP_m4GO:005138response tr3/727    | 76/23843  | 0.409964 | 0.767302 | 0.755823 | Mir155/Sst   |
| GO_BP_m4GO:005196positive re3/727    | 76/23843  | 0.409964 | 0.767302 | 0.755823 | Flrt1/Lrrc4k |
| GO_BP_m4GO:190332negative re3/727    | 76/23843  | 0.409964 | 0.767302 | 0.755823 | Rela/Rps3/   |
| GO_BP_m4GO:190395positive re3/727    | 76/23843  | 0.409964 | 0.767302 | 0.755823 | Plagl2/Torr  |
| GO_BP_m4GO:000317heart valve 2/727   | 46/23843  | 0.411332 | 0.767302 | 0.755823 | Efna1/Nfat   |
| GO_BP_m4GO:001488striated m2/727     | 46/23843  | 0.411332 | 0.767302 | 0.755823 | Gtf2ird1/N   |
| GO_BP_m4GO:002177olfactory b 2/727   | 46/23843  | 0.411332 | 0.767302 | 0.755823 | Fezf1/Mir2   |
| GO_BP_m4GO:007054response tr2/727    | 46/23843  | 0.411332 | 0.767302 | 0.755823 | Ffar3/Pid1   |
| GO_BP_m4GO:007252purine-cor 2/727    | 46/23843  | 0.411332 | 0.767302 | 0.755823 | Aox3/Nudt    |
| GO_BP_m4GO:200122regulation 2/727    | 46/23843  | 0.411332 | 0.767302 | 0.755823 | Sox14/Tnn    |
| GO_BP_m4GO:004881dendrite m6/727     | 169/23843 | 0.411347 | 0.767302 | 0.755823 | Anapc2/Ar    |
| GO_BP_m4GO:000095nuclear-tra4/727    | 107/23843 | 0.412384 | 0.767302 | 0.755823 | Cnot6/Eif3c  |
| GO_BP_m4GO:00019Cleukocyte r4/727    | 107/23843 | 0.412384 | 0.767302 | 0.755823 | Ager/Dnas    |
| GO_BP_m4GO:000633nucleosom4/727      | 107/23843 | 0.412384 | 0.767302 | 0.755823 | Anp32b/Hp    |
| GO_BP_m4GO:000834adult locon4/727    | 107/23843 | 0.412384 | 0.767302 | 0.755823 | Dmbx1/Otr    |
| GO_BP_m4GO:004275regulation 4/727    | 107/23843 | 0.412384 | 0.767302 | 0.755823 | Hctr1/Sfpc   |
| GO_BP_m4GO:000265positive re5/727    | 138/23843 | 0.412401 | 0.767302 | 0.755823 | C3ar1/Gast   |
| GO_BP_m4GO:005065negative re5/727    | 138/23843 | 0.412401 | 0.767302 | 0.755823 | Ager/Dusp    |
| GO_BP_m4GO:190199negative re5/727    | 138/23843 | 0.412401 | 0.767302 | 0.755823 | Btn2a2/Hu    |
| GO_BP_m4GO:000735pattern spe15/727   | 454/23843 | 0.412459 | 0.767302 | 0.755823 | Arc/Aurka/   |
| GO_BP_m4GO:007252purine-cor 16/727   | 486/23843 | 0.412815 | 0.767667 | 0.756182 | Ak3/Aox3/    |
| GO_BP_m4GO:004863positive re7/727    | 201/23843 | 0.414739 | 0.770944 | 0.759411 | Anapc2/Mi    |
| GO_BP_m4GO:001943aromatic c15/727    | 455/23843 | 0.41577  | 0.77256  | 0.761002 | Aox3/Cnot    |
| GO_BP_m4GO:012003plasma me 16/727    | 487/23843 | 0.416017 | 0.772718 | 0.761158 | Abcc4/Atx    |
| GO_BP_m4GO:003004actin filame6/727   | 170/23843 | 0.416785 | 0.773844 | 0.762267 | Arhgap18/    |
| GO_BP_m4GO:000911ribonucleo:3/727    | 77/23843  | 0.418148 | 0.774325 | 0.76274  | Ak3/Nme5     |
| GO_BP_m4GO:00331C mitochond 3/727    | 77/23843  | 0.418148 | 0.774325 | 0.76274  | Coa5/Nduf    |
| GO_BP_m4GO:004324negative re3/727    | 77/23843  | 0.418148 | 0.774325 | 0.76274  | Nav3/Sptar   |
| GO_BP_m4GO:005134regulation 3/727    | 77/23843  | 0.418148 | 0.774325 | 0.76274  | Cdh3/Il13/   |
| GO_BP_m4GO:009063activation c3/727   | 77/23843  | 0.418148 | 0.774325 | 0.76274  | Rundc1/Tb    |
| GO_BP_m4GO:190331negative re3/727    | 77/23843  | 0.418148 | 0.774325 | 0.76274  | Nbas/Nelfe   |
| GO_BP_m4GO:19039Cregulation 5/727    | 139/23843 | 0.418432 | 0.774325 | 0.76274  | A230050P2    |
| GO_BP_m4GO:006004heart contr 7/727   | 202/23843 | 0.419726 | 0.774325 | 0.76274  | Cacna1b/C    |
| GO_BP_m4GO:001604lipid catabc 10/727 | 297/23843 | 0.420076 | 0.774325 | 0.76274  | Abhd4/Akr    |
| GO_BP_m4GO:000636transcriptic 2/727  | 47/23843  | 0.421959 | 0.774325 | 0.76274  | Nelfe/Recq   |
| GO_BP_m4GO:003089positive re2/727    | 47/23843  | 0.421959 | 0.774325 | 0.76274  | Il13/Irs2    |
| GO_BP_m4GO:004521sarcomere 2/727     | 47/23843  | 0.421959 | 0.774325 | 0.76274  | Myom2/Ne     |
| GO_BP_m4GO:004562negative re2/727    | 47/23843  | 0.421959 | 0.774325 | 0.76274  | Erbp2/Socs   |
| GO_BP_m4GO:004615phenol-coi2/727     | 47/23843  | 0.421959 | 0.774325 | 0.76274  | Cdh3/Zeb2    |
| GO_BP_m4GO:004845autonomic 2/727     | 47/23843  | 0.421959 | 0.774325 | 0.76274  | Erbp2/Ret    |
| GO_BP_m4GO:190403negative re2/727    | 47/23843  | 0.421959 | 0.774325 | 0.76274  | Gas6/Il13    |
| GO_BP_m4GO:000632DNA packe6/727      | 171/23843 | 0.422217 | 0.774325 | 0.76274  | Anp32b/Er    |
| GO_BP_m4GO:00072C phospholiç 4/727   | 109/23843 | 0.426101 | 0.774325 | 0.76274  | C3ar1/Grm    |
| GO_BP_m4GO:007162granulocyti4/727    | 109/23843 | 0.426101 | 0.774325 | 0.76274  | C3ar1/Lgal   |
| GO_BP_m4GO:004584positive re3/727    | 78/23843  | 0.426294 | 0.774325 | 0.76274  | Mapk14/Pi    |

|                   |                                      |           |          |          |          |            |
|-------------------|--------------------------------------|-----------|----------|----------|----------|------------|
| GO_BP_m4GO:004636 | monosaccharide 3/727                 | 78/23843  | 0.426294 | 0.774325 | 0.76274  | Car5a/C1q  |
| GO_BP_m4GO:004653 | photoreceptor 3/727                  | 78/23843  | 0.426294 | 0.774325 | 0.76274  | Cabp4/Gna  |
| GO_BP_m4GO:004863 | positive regulation 3/727            | 78/23843  | 0.426294 | 0.774325 | 0.76274  | Mapk14/Pi  |
| GO_BP_m4GO:190374 | positive regulation 3/727            | 78/23843  | 0.426294 | 0.774325 | 0.76274  | Plagl2/Tor |
| GO_BP_m4GO:000171 | mesoderm 1/727                       | 18/23843  | 0.427409 | 0.774325 | 0.76274  | Sox17      |
| GO_BP_m4GO:000207 | osteoblast 1/727                     | 18/23843  | 0.427409 | 0.774325 | 0.76274  | Tnn        |
| GO_BP_m4GO:000271 | negative regulation 1/727            | 18/23843  | 0.427409 | 0.774325 | 0.76274  | Muc4       |
| GO_BP_m4GO:000282 | positive regulation 1/727            | 18/23843  | 0.427409 | 0.774325 | 0.76274  | Socs5      |
| GO_BP_m4GO:000305 | glomerular 1/727                     | 18/23843  | 0.427409 | 0.774325 | 0.76274  | Gas6       |
| GO_BP_m4GO:000655 | methionine 1/727                     | 18/23843  | 0.427409 | 0.774325 | 0.76274  | Bhmt       |
| GO_BP_m4GO:000668 | glycosphingolipid 1/727              | 18/23843  | 0.427409 | 0.774325 | 0.76274  | A4galt     |
| GO_BP_m4GO:000682 | copper ion 1/727                     | 18/23843  | 0.427409 | 0.774325 | 0.76274  | Heph       |
| GO_BP_m4GO:000715 | activation 1/727                     | 18/23843  | 0.427409 | 0.774325 | 0.76274  | Tshr       |
| GO_BP_m4GO:000995 | dorsal/ventral 1/727                 | 18/23843  | 0.427409 | 0.774325 | 0.76274  | Vax2       |
| GO_BP_m4GO:001088 | regulation 1/727                     | 18/23843  | 0.427409 | 0.774325 | 0.76274  | Slc8a1     |
| GO_BP_m4GO:001581 | gamma-aminobutyrate 1/727            | 18/23843  | 0.427409 | 0.774325 | 0.76274  | Htr2c      |
| GO_BP_m4GO:001607 | rRNA catabolism 1/727                | 18/23843  | 0.427409 | 0.774325 | 0.76274  | Ern2       |
| GO_BP_m4GO:002002 | hemoglobin 1/727                     | 18/23843  | 0.427409 | 0.774325 | 0.76274  | Inhba      |
| GO_BP_m4GO:002151 | ventral spiracle 1/727               | 18/23843  | 0.427409 | 0.774325 | 0.76274  | Nkx6-2     |
| GO_BP_m4GO:002201 | central nervous system 1/727         | 18/23843  | 0.427409 | 0.774325 | 0.76274  | Nkx6-2     |
| GO_BP_m4GO:003015 | protein import 1/727                 | 18/23843  | 0.427409 | 0.774325 | 0.76274  | Tomm7      |
| GO_BP_m4GO:003050 | negative regulation 1/727            | 18/23843  | 0.427409 | 0.774325 | 0.76274  | Gata1      |
| GO_BP_m4GO:003195 | regulation 1/727                     | 18/23843  | 0.427409 | 0.774325 | 0.76274  | Irs2       |
| GO_BP_m4GO:003227 | gonadotropin-releasing hormone 1/727 | 18/23843  | 0.427409 | 0.774325 | 0.76274  | Inhba      |
| GO_BP_m4GO:003228 | axon ensheathment 1/727              | 18/23843  | 0.427409 | 0.774325 | 0.76274  | Nkx6-2     |
| GO_BP_m4GO:003243 | melanosome 1/727                     | 18/23843  | 0.427409 | 0.774325 | 0.76274  | Zeb2       |
| GO_BP_m4GO:003265 | negative regulation 1/727            | 18/23843  | 0.427409 | 0.774325 | 0.76274  | Ager       |
| GO_BP_m4GO:003450 | protein localization 1/727           | 18/23843  | 0.427409 | 0.774325 | 0.76274  | Spdl1      |
| GO_BP_m4GO:003615 | outer dynein arm 1/727               | 18/23843  | 0.427409 | 0.774325 | 0.76274  | Ccdc114    |
| GO_BP_m4GO:004003 | negative regulation 1/727            | 18/23843  | 0.427409 | 0.774325 | 0.76274  | Spry2      |
| GO_BP_m4GO:004337 | negative regulation 1/727            | 18/23843  | 0.427409 | 0.774325 | 0.76274  | Socs5      |
| GO_BP_m4GO:004355 | regulation 1/727                     | 18/23843  | 0.427409 | 0.774325 | 0.76274  | Ppp1r15b   |
| GO_BP_m4GO:004562 | negative regulation 1/727            | 18/23843  | 0.427409 | 0.774325 | 0.76274  | Socs5      |
| GO_BP_m4GO:004595 | negative regulation 1/727            | 18/23843  | 0.427409 | 0.774325 | 0.76274  | Serpinb9   |
| GO_BP_m4GO:004632 | positive regulation 1/727            | 18/23843  | 0.427409 | 0.774325 | 0.76274  | Irs2       |
| GO_BP_m4GO:004817 | regulation 1/727                     | 18/23843  | 0.427409 | 0.774325 | 0.76274  | Syn1       |
| GO_BP_m4GO:005096 | detection of chemical stimulus 1/727 | 18/23843  | 0.427409 | 0.774325 | 0.76274  | Lxn        |
| GO_BP_m4GO:005096 | detection of chemical stimulus 1/727 | 18/23843  | 0.427409 | 0.774325 | 0.76274  | Lxn        |
| GO_BP_m4GO:005160 | histamine transport 1/727            | 18/23843  | 0.427409 | 0.774325 | 0.76274  | Vamp8      |
| GO_BP_m4GO:006071 | spongiosum 1/727                     | 18/23843  | 0.427409 | 0.774325 | 0.76274  | Zfp361l1   |
| GO_BP_m4GO:006084 | venous blood vessel 1/727            | 18/23843  | 0.427409 | 0.774325 | 0.76274  | Ccm2       |
| GO_BP_m4GO:007087 | positive regulation 1/727            | 18/23843  | 0.427409 | 0.774325 | 0.76274  | Irs2       |
| GO_BP_m4GO:190204 | positive regulation 1/727            | 18/23843  | 0.427409 | 0.774325 | 0.76274  | Pidd1      |
| GO_BP_m4GO:200026 | regulation 1/727                     | 18/23843  | 0.427409 | 0.774325 | 0.76274  | Gas6       |
| GO_BP_m4GO:004573 | positive regulation 7/727            | 204/23843 | 0.429687 | 0.777863 | 0.766225 | Aurka/Ned  |
| GO_BP_m4GO:007110 | DNA conformation 7/727               | 204/23843 | 0.429687 | 0.777863 | 0.766225 | Anp32b/Er  |
| GO_BP_m4GO:000158 | detection of chemical stimulus 2/727 | 48/23843  | 0.432487 | 0.779307 | 0.767648 | Gnat1/Tas2 |
| GO_BP_m4GO:000227 | mast cell activation 2/727           | 48/23843  | 0.432487 | 0.779307 | 0.767648 | Il13/Vamp8 |

|                                |            |           |          |          |          |             |
|--------------------------------|------------|-----------|----------|----------|----------|-------------|
| GO_BP_m4GO:000636transcription | 2/727      | 48/23843  | 0.432487 | 0.779307 | 0.767648 | Erbp2/Polr  |
| GO_BP_m4GO:000958detection     | c2/727     | 48/23843  | 0.432487 | 0.779307 | 0.767648 | Cabp4/Gna   |
| GO_BP_m4GO:001076fibroblast    | r2/727     | 48/23843  | 0.432487 | 0.779307 | 0.767648 | Ager/Slc8a  |
| GO_BP_m4GO:002198olfactory     | lc2/727    | 48/23843  | 0.432487 | 0.779307 | 0.767648 | Fezf1/Mir2  |
| GO_BP_m4GO:004258neuron        | ma2/727    | 48/23843  | 0.432487 | 0.779307 | 0.767648 | Cspg4/Ret   |
| GO_BP_m4GO:004330regulation    | 2/727      | 48/23843  | 0.432487 | 0.779307 | 0.767648 | Il13/Vamp8  |
| GO_BP_m4GO:004330mast cell     | d2/727     | 48/23843  | 0.432487 | 0.779307 | 0.767648 | Il13/Vamp8  |
| GO_BP_m4GO:005198positive      | reç2/727   | 48/23843  | 0.432487 | 0.779307 | 0.767648 | Htr2c/Rtn4  |
| GO_BP_m4GO:000300regionaliza   | 12/727     | 364/23843 | 0.432759 | 0.779307 | 0.767648 | Arc/Aurka/  |
| GO_BP_m4GO:000268regulation    | 4/727      | 110/23843 | 0.43293  | 0.779307 | 0.767648 | C3ar1/Gast  |
| GO_BP_m4GO:004864negative      | re4/727    | 110/23843 | 0.43293  | 0.779307 | 0.767648 | Dusp10/Mi   |
| GO_BP_m4GO:005086negative      | re4/727    | 110/23843 | 0.43293  | 0.779307 | 0.767648 | Btn2a2/Erb  |
| GO_BP_m4GO:005126protein       | deç4/727   | 110/23843 | 0.43293  | 0.779307 | 0.767648 | Gak/Nav3/   |
| GO_BP_m4GO:000718adenylate     | c3/727     | 79/23843  | 0.4344   | 0.780484 | 0.768807 | Ffar3/Grm1  |
| GO_BP_m4GO:003410regulation    | 3/727      | 79/23843  | 0.4344   | 0.780484 | 0.768807 | Ager/Car2/  |
| GO_BP_m4GO:004852positive      | reç3/727   | 79/23843  | 0.4344   | 0.780484 | 0.768807 | Ppid/Ythdc  |
| GO_BP_m4GO:007028actin-medi    | 3/727      | 79/23843  | 0.4344   | 0.780484 | 0.768807 | Cacna1g/D   |
| GO_BP_m4GO:190186positive      | reç3/727   | 79/23843  | 0.4344   | 0.780484 | 0.768807 | Mapk14/Pi   |
| GO_BP_m4GO:000301heart         | procç7/727 | 205/23843 | 0.43466  | 0.780658 | 0.768979 | Cacna1b/C   |
| GO_BP_m4GO:190303regulation    | 9/727      | 269/23843 | 0.436206 | 0.781402 | 0.769712 | Ager/Bcl10  |
| GO_BP_m4GO:007146cellular      | resç5/727  | 142/23843 | 0.436457 | 0.781402 | 0.769712 | Cyp1a2/Cy   |
| GO_BP_m4GO:003033positive      | reç16/727  | 494/23843 | 0.438448 | 0.781402 | 0.769712 | Ager/C3ar1  |
| GO_BP_m4GO:000918purine        | ribo14/727 | 430/23843 | 0.439439 | 0.781402 | 0.769712 | Ak3/Atp5c:  |
| GO_BP_m4GO:000863intrinsic     | ap4/727    | 111/23843 | 0.439736 | 0.781402 | 0.769712 | Phlda3/Pol  |
| GO_BP_m4GO:007232monocarb      | c4/727     | 111/23843 | 0.439736 | 0.781402 | 0.769712 | Akr1d1/Cy   |
| GO_BP_m4GO:000720positive      | reç10/727  | 302/23843 | 0.440585 | 0.781402 | 0.769712 | C3ar1/Cacr  |
| GO_BP_m4GO:000918cyclic        | nucle5/727 | 143/23843 | 0.442438 | 0.781402 | 0.769712 | Cap2/Gngi   |
| GO_BP_m4GO:001067regulation    | 5/727      | 143/23843 | 0.442438 | 0.781402 | 0.769712 | C1qtnf12/Il |
| GO_BP_m4GO:000227myeloid       | ce3/727    | 80/23843  | 0.442463 | 0.781402 | 0.769712 | Dnase1/Il1: |
| GO_BP_m4GO:003196response      | trç3/727   | 80/23843  | 0.442463 | 0.781402 | 0.769712 | Mir155/Sst  |
| GO_BP_m4GO:007030cellular      | resç3/727  | 80/23843  | 0.442463 | 0.781402 | 0.769712 | Rela/Ripk1  |
| GO_BP_m4GO:000244mast cell     | rr2/727    | 49/23843  | 0.442911 | 0.781402 | 0.769712 | Il13/Vamp8  |
| GO_BP_m4GO:001714stem cell     | d2/727     | 49/23843  | 0.442911 | 0.781402 | 0.769712 | Sox17/Tho   |
| GO_BP_m4GO:003083regulation    | 2/727      | 49/23843  | 0.442911 | 0.781402 | 0.769712 | Sptan1/Tm   |
| GO_BP_m4GO:003111regulation    | 2/727      | 49/23843  | 0.442911 | 0.781402 | 0.769712 | Nav3/Rps3   |
| GO_BP_m4GO:003300regulation    | 2/727      | 49/23843  | 0.442911 | 0.781402 | 0.769712 | Il13/Vamp8  |
| GO_BP_m4GO:004408regulation    | 2/727      | 49/23843  | 0.442911 | 0.781402 | 0.769712 | Apoa4/Var   |
| GO_BP_m4GO:004614pigment       | bi2/727    | 49/23843  | 0.442911 | 0.781402 | 0.769712 | Cdh3/Zeb2   |
| GO_BP_m4GO:005077positive      | reç2/727   | 49/23843  | 0.442911 | 0.781402 | 0.769712 | Anapc2/Tie  |
| GO_BP_m4GO:005502positive      | reç2/727   | 49/23843  | 0.442911 | 0.781402 | 0.769712 | Mapk14/Pi   |
| GO_BP_m4GO:007097protein       | loc2/727   | 49/23843  | 0.442911 | 0.781402 | 0.769712 | Folr1/Rtn4  |
| GO_BP_m4GO:190204regulation    | 2/727      | 49/23843  | 0.442911 | 0.781402 | 0.769712 | Lgals3/Pidc |
| GO_BP_m4GO:200067regulation    | 2/727      | 49/23843  | 0.442911 | 0.781402 | 0.769712 | Ddit3/Gata  |
| GO_BP_m4GO:004390regulation    | 13/727     | 399/23843 | 0.443426 | 0.781402 | 0.769712 | A230050P2   |
| GO_BP_m4GO:000168gastric       | acic1/727  | 19/23843  | 0.444881 | 0.781402 | 0.769712 | Slc9a4      |
| GO_BP_m4GO:000271negative      | re1/727    | 19/23843  | 0.444881 | 0.781402 | 0.769712 | Serpinb9    |
| GO_BP_m4GO:000652arginine      | mç1/727    | 19/23843  | 0.444881 | 0.781402 | 0.769712 | Fah         |
| GO_BP_m4GO:000690pinocytosis   | 1/727      | 19/23843  | 0.444881 | 0.781402 | 0.769712 | Ehd4        |



|                                       |           |          |          |          |             |
|---------------------------------------|-----------|----------|----------|----------|-------------|
| GO_BP_m4GO:00082C androgen r1/727     | 19/23843  | 0.444881 | 0.781402 | 0.769712 | Akr1d1      |
| GO_BP_m4GO:00101E regulation 1/727    | 19/23843  | 0.444881 | 0.781402 | 0.769712 | Il13        |
| GO_BP_m4GO:001044 response tr1/727    | 19/23843  | 0.444881 | 0.781402 | 0.769712 | Kcne1       |
| GO_BP_m4GO:00106E positive re1/727    | 19/23843  | 0.444881 | 0.781402 | 0.769712 | Fndc1       |
| GO_BP_m4GO:00106E positive re1/727    | 19/23843  | 0.444881 | 0.781402 | 0.769712 | Fndc1       |
| GO_BP_m4GO:00160E synaptic ve1/727    | 19/23843  | 0.444881 | 0.781402 | 0.769712 | Snap47      |
| GO_BP_m4GO:00302Z platelet for1/727   | 19/23843  | 0.444881 | 0.781402 | 0.769712 | Gata1       |
| GO_BP_m4GO:00323E intracellula 1/727  | 19/23843  | 0.444881 | 0.781402 | 0.769712 | Plekha8     |
| GO_BP_m4GO:00328Z regulation 1/727    | 19/23843  | 0.444881 | 0.781402 | 0.769712 | Gas6        |
| GO_BP_m4GO:00336C positive re1/727    | 19/23843  | 0.444881 | 0.781402 | 0.769712 | Rtn4        |
| GO_BP_m4GO:003361 mitochond 1/727     | 19/23843  | 0.444881 | 0.781402 | 0.769712 | Coa5        |
| GO_BP_m4GO:00339E cytoplasmic 1/727   | 19/23843  | 0.444881 | 0.781402 | 0.769712 | Cnot6       |
| GO_BP_m4GO:00354E cargo load 1/727    | 19/23843  | 0.444881 | 0.781402 | 0.769712 | Sec13       |
| GO_BP_m4GO:00354E SNARE con 1/727     | 19/23843  | 0.444881 | 0.781402 | 0.769712 | Vamp8       |
| GO_BP_m4GO:004424 cellular pol 1/727  | 19/23843  | 0.444881 | 0.781402 | 0.769712 | Manba       |
| GO_BP_m4GO:00456Z positive re1/727    | 19/23843  | 0.444881 | 0.781402 | 0.769712 | Socs5       |
| GO_BP_m4GO:00468Z positive re1/727    | 19/23843  | 0.444881 | 0.781402 | 0.769712 | Gas6        |
| GO_BP_m4GO:00487E pigment gr1/727     | 19/23843  | 0.444881 | 0.781402 | 0.769712 | Zeb2        |
| GO_BP_m4GO:005077 negative re1/727    | 19/23843  | 0.444881 | 0.781402 | 0.769712 | Efna1       |
| GO_BP_m4GO:00508E neuromusc 1/727     | 19/23843  | 0.444881 | 0.781402 | 0.769712 | Slurp1      |
| GO_BP_m4GO:00513E kinetochor 1/727    | 19/23843  | 0.444881 | 0.781402 | 0.769712 | Cenps       |
| GO_BP_m4GO:00550C cardiac my 1/727    | 19/23843  | 0.444881 | 0.781402 | 0.769712 | Myom2       |
| GO_BP_m4GO:00601Z regulation 1/727    | 19/23843  | 0.444881 | 0.781402 | 0.769712 | Itsn1       |
| GO_BP_m4GO:00602C cilium mov 1/727    | 19/23843  | 0.444881 | 0.781402 | 0.769712 | Tekt5       |
| GO_BP_m4GO:00604E positive re1/727    | 19/23843  | 0.444881 | 0.781402 | 0.769712 | Vamp8       |
| GO_BP_m4GO:00725Z seminiferot 1/727   | 19/23843  | 0.444881 | 0.781402 | 0.769712 | Brip1       |
| GO_BP_m4GO:00972C renal filtrat 1/727 | 19/23843  | 0.444881 | 0.781402 | 0.769712 | Gas6        |
| GO_BP_m4GO:009724 amyloid-b 1/727     | 19/23843  | 0.444881 | 0.781402 | 0.769712 | Mme         |
| GO_BP_m4GO:190001 positive re1/727    | 19/23843  | 0.444881 | 0.781402 | 0.769712 | Mir324      |
| GO_BP_m4GO:19023C positive re1/727    | 19/23843  | 0.444881 | 0.781402 | 0.769712 | Cnksr3      |
| GO_BP_m4GO:20001E regulation 1/727    | 19/23843  | 0.444881 | 0.781402 | 0.769712 | Pim1        |
| GO_BP_m4GO:00022E T cell activ 4/727  | 112/23843 | 0.446518 | 0.783414 | 0.771694 | Ifna12/Il27 |
| GO_BP_m4GO:00080E tRNA proc 4/727     | 112/23843 | 0.446518 | 0.783414 | 0.771694 | Dus2/Fars2  |
| GO_BP_m4GO:00343E adherens ju 4/727   | 112/23843 | 0.446518 | 0.783414 | 0.771694 | Cdh24/Cdh   |
| GO_BP_m4GO:00550C striated mu 6/727   | 176/23843 | 0.449257 | 0.787715 | 0.775931 | Fhl2/Myom   |
| GO_BP_m4GO:005164 vesicle loc 7/727   | 208/23843 | 0.449539 | 0.787715 | 0.775931 | Cdh3/Mre1   |
| GO_BP_m4GO:000721 glutamate 3/727     | 81/23843  | 0.450481 | 0.787715 | 0.775931 | Arc/Grm1/   |
| GO_BP_m4GO:001574 organophc 3/727     | 81/23843  | 0.450481 | 0.787715 | 0.775931 | Abcb4/Apc   |
| GO_BP_m4GO:00480Z regulation 3/727    | 81/23843  | 0.450481 | 0.787715 | 0.775931 | Rbfox3/Srs  |
| GO_BP_m4GO:00701E regulation 3/727    | 81/23843  | 0.450481 | 0.787715 | 0.775931 | Gas6/Gata   |
| GO_BP_m4GO:19004C regulation 3/727    | 81/23843  | 0.450481 | 0.787715 | 0.775931 | Nme5/Ripk   |
| GO_BP_m4GO:00096E response tr 11/727  | 337/23843 | 0.452132 | 0.787715 | 0.775931 | Apoa4/Htr   |
| GO_BP_m4GO:00420E wound hea 11/727    | 337/23843 | 0.452132 | 0.787715 | 0.775931 | Ager/Dusp   |
| GO_BP_m4GO:005087 regulation 11/727   | 337/23843 | 0.452132 | 0.787715 | 0.775931 | F12/F5/Gal  |
| GO_BP_m4GO:004001 negative re 10/727  | 305/23843 | 0.45286  | 0.787715 | 0.775931 | Ager/Ctnn   |
| GO_BP_m4GO:00002E nuclear-tra 2/727   | 50/23843  | 0.453228 | 0.787715 | 0.775931 | Cnot6/Zfp   |
| GO_BP_m4GO:00068E Golgi to pl 2/727   | 50/23843  | 0.453228 | 0.787715 | 0.775931 | Blzf1/Rab3  |
| GO_BP_m4GO:001401 negative re 2/727   | 50/23843  | 0.453228 | 0.787715 | 0.775931 | Dusp10/Nk   |

|                   |                       |        |           |          |          |          |            |
|-------------------|-----------------------|--------|-----------|----------|----------|----------|------------|
| GO_BP_m4GO:003112 | mRNA 3'-ε             | 2/727  | 50/23843  | 0.453228 | 0.787715 | 0.775931 | Nelfe/Zfp3 |
| GO_BP_m4GO:003235 | regulation            | 2/727  | 50/23843  | 0.453228 | 0.787715 | 0.775931 | Ffar3/Vdr  |
| GO_BP_m4GO:003362 | cell adhesion         | 2/727  | 50/23843  | 0.453228 | 0.787715 | 0.775931 | Efna1/Ret  |
| GO_BP_m4GO:004295 | amyloid precursor     | 2/727  | 50/23843  | 0.453228 | 0.787715 | 0.775931 | Efna1/Tme  |
| GO_BP_m4GO:004361 | regulation            | 2/727  | 50/23843  | 0.453228 | 0.787715 | 0.775931 | Atf6b/Ddit |
| GO_BP_m4GO:190161 | organic hydrolysis    | 2/727  | 50/23843  | 0.453228 | 0.787715 | 0.775931 | Akr1d1/Cy  |
| GO_BP_m4GO:000185 | embryonic             | 4/727  | 113/23843 | 0.453275 | 0.787715 | 0.775931 | Grb2/Ovol  |
| GO_BP_m4GO:003315 | regulation            | 9/727  | 273/23843 | 0.453521 | 0.787715 | 0.775931 | ErbB2/Gas  |
| GO_BP_m4GO:003424 | negative regulation   | 8/727  | 241/23843 | 0.454081 | 0.787715 | 0.775931 | Grb7/Mir1  |
| GO_BP_m4GO:000716 | establishment         | 7/727  | 209/23843 | 0.454484 | 0.787715 | 0.775931 | Cap2/Ctnn  |
| GO_BP_m4GO:000840 | gonadotropin          | 7/727  | 209/23843 | 0.454484 | 0.787715 | 0.775931 | Brip1/Esr2 |
| GO_BP_m4GO:005145 | regulation            | 11/727 | 338/23843 | 0.456018 | 0.787715 | 0.775931 | C3ar1/Cacr |
| GO_BP_m4GO:004427 | cellular nitric oxide | 14/727 | 435/23843 | 0.456594 | 0.787715 | 0.775931 | Aox3/Cnot  |
| GO_BP_m4GO:003020 | glycosaminoglycan     | 3/727  | 82/23843  | 0.458451 | 0.787715 | 0.775931 | Pxylp1/Sp  |
| GO_BP_m4GO:003264 | regulation            | 3/727  | 82/23843  | 0.458451 | 0.787715 | 0.775931 | Ager/Ffar3 |
| GO_BP_m4GO:007233 | intrinsic apoptosis   | 3/727  | 82/23843  | 0.458451 | 0.787715 | 0.775931 | Phlda3/Zm  |
| GO_BP_m4GO:000806 | regulation            | 6/727  | 178/23843 | 0.459999 | 0.787715 | 0.775931 | Arhgap18/  |
| GO_BP_m4GO:005079 | regulation            | 6/727  | 178/23843 | 0.459999 | 0.787715 | 0.775931 | A230050P2  |
| GO_BP_m4GO:006500 | protein-DNA           | 6/727  | 178/23843 | 0.459999 | 0.787715 | 0.775931 | Anp32b/Ce  |
| GO_BP_m4GO:000307 | regulation            | 4/727  | 114/23843 | 0.460004 | 0.787715 | 0.775931 | Gas6/Kcnk  |
| GO_BP_m4GO:004217 | negative regulation   | 4/727  | 114/23843 | 0.460004 | 0.787715 | 0.775931 | Efna1/Pdcl |
| GO_BP_m4GO:009917 | postsynaptic          | 4/727  | 114/23843 | 0.460004 | 0.787715 | 0.775931 | Arc/Efna1/ |
| GO_BP_m4GO:002261 | gland morphology      | 5/727  | 146/23843 | 0.460287 | 0.787715 | 0.775931 | Duox2/Esr2 |
| GO_BP_m4GO:004666 | female sex            | 5/727  | 146/23843 | 0.460287 | 0.787715 | 0.775931 | Esr2/Fanca |
| GO_BP_m4GO:006201 | regulation            | 13/727 | 404/23843 | 0.461241 | 0.787715 | 0.775931 | Acmsd/Ap   |
| GO_BP_m4GO:000025 | nuclear-transcription | 1/727  | 20/23843  | 0.461821 | 0.787715 | 0.775931 | Cnot6      |
| GO_BP_m4GO:000194 | lymphangiogenesis     | 1/727  | 20/23843  | 0.461821 | 0.787715 | 0.775931 | Nfatc1     |
| GO_BP_m4GO:000237 | cytokine secretion    | 1/727  | 20/23843  | 0.461821 | 0.787715 | 0.775931 | Mapk14     |
| GO_BP_m4GO:000911 | vitamin biosynthesis  | 1/727  | 20/23843  | 0.461821 | 0.787715 | 0.775931 | Vdr        |
| GO_BP_m4GO:001056 | positive regulation   | 1/727  | 20/23843  | 0.461821 | 0.787715 | 0.775931 | Pxylp1     |
| GO_BP_m4GO:001480 | release of            | 1/727  | 20/23843  | 0.461821 | 0.787715 | 0.775931 | Slc8a1     |
| GO_BP_m4GO:001573 | prostaglandin         | 1/727  | 20/23843  | 0.461821 | 0.787715 | 0.775931 | Abcc4      |
| GO_BP_m4GO:001645 | peptide hormone       | 1/727  | 20/23843  | 0.461821 | 0.787715 | 0.775931 | Ece2       |
| GO_BP_m4GO:002240 | cell cycle process    | 1/727  | 20/23843  | 0.461821 | 0.787715 | 0.775931 | Nfatc1     |
| GO_BP_m4GO:003054 | female genital        | 1/727  | 20/23843  | 0.461821 | 0.787715 | 0.775931 | Esr2       |
| GO_BP_m4GO:003164 | negative regulation   | 1/727  | 20/23843  | 0.461821 | 0.787715 | 0.775931 | Hcrt       |
| GO_BP_m4GO:003214 | activation            | 1/727  | 20/23843  | 0.461821 | 0.787715 | 0.775931 | Gas6       |
| GO_BP_m4GO:003233 | positive regulation   | 1/727  | 20/23843  | 0.461821 | 0.787715 | 0.775931 | Rela       |
| GO_BP_m4GO:003265 | negative regulation   | 1/727  | 20/23843  | 0.461821 | 0.787715 | 0.775931 | Socs5      |
| GO_BP_m4GO:003359 | regulation            | 1/727  | 20/23843  | 0.461821 | 0.787715 | 0.775931 | Rtn4       |
| GO_BP_m4GO:003386 | nucleoside            | 1/727  | 20/23843  | 0.461821 | 0.787715 | 0.775931 | Nudt7      |
| GO_BP_m4GO:003387 | ribonucleoside        | 1/727  | 20/23843  | 0.461821 | 0.787715 | 0.775931 | Nudt7      |
| GO_BP_m4GO:003403 | purine nucleoside     | 1/727  | 20/23843  | 0.461821 | 0.787715 | 0.775931 | Nudt7      |
| GO_BP_m4GO:003535 | thioester bond        | 1/727  | 20/23843  | 0.461821 | 0.787715 | 0.775931 | Pdhx       |
| GO_BP_m4GO:003634 | platelet maturation   | 1/727  | 20/23843  | 0.461821 | 0.787715 | 0.775931 | Gata1      |
| GO_BP_m4GO:004273 | fibrinolysis          | 1/727  | 20/23843  | 0.461821 | 0.787715 | 0.775931 | F12        |
| GO_BP_m4GO:004434 | fibroblast activation | 1/727  | 20/23843  | 0.461821 | 0.787715 | 0.775931 | Gas6       |
| GO_BP_m4GO:004855 | embryonic             | 1/727  | 20/23843  | 0.461821 | 0.787715 | 0.775931 | Ovol2      |

|                                       |           |          |          |          |             |
|---------------------------------------|-----------|----------|----------|----------|-------------|
| GO_BP_m4GO:00509C detection c1/727    | 20/23843  | 0.461821 | 0.787715 | 0.775931 | Gnat1       |
| GO_BP_m4GO:00509E detection c1/727    | 20/23843  | 0.461821 | 0.787715 | 0.775931 | Gnat1       |
| GO_BP_m4GO:005134 positive reC1/727   | 20/23843  | 0.461821 | 0.787715 | 0.775931 | Tshr        |
| GO_BP_m4GO:00550E response tr1/727    | 20/23843  | 0.461821 | 0.787715 | 0.775931 | Socs5       |
| GO_BP_m4GO:006132 cell prolifer1/727  | 20/23843  | 0.461821 | 0.787715 | 0.775931 | Pim1        |
| GO_BP_m4GO:007161 acyl-CoA b1/727     | 20/23843  | 0.461821 | 0.787715 | 0.775931 | Pdhx        |
| GO_BP_m4GO:00955C acetylcholin1/727   | 20/23843  | 0.461821 | 0.787715 | 0.775931 | Ly6g6d      |
| GO_BP_m4GO:00987E response tr1/727    | 20/23843  | 0.461821 | 0.787715 | 0.775931 | Tomm7       |
| GO_BP_m4GO:00996E protein tra1/727    | 20/23843  | 0.461821 | 0.787715 | 0.775931 | Snap47      |
| GO_BP_m4GO:00996E neurotrans1/727     | 20/23843  | 0.461821 | 0.787715 | 0.775931 | Snap47      |
| GO_BP_m4GO:19001C regulation 1/727    | 20/23843  | 0.461821 | 0.787715 | 0.775931 | Atf6b       |
| GO_BP_m4GO:190122 negative re1/727    | 20/23843  | 0.461821 | 0.787715 | 0.775931 | Rela        |
| GO_BP_m4GO:19038E signal tranC1/727   | 20/23843  | 0.461821 | 0.787715 | 0.775931 | Ly6g6d      |
| GO_BP_m4GO:190514 response tr1/727    | 20/23843  | 0.461821 | 0.787715 | 0.775931 | Ly6g6d      |
| GO_BP_m4GO:190514 cellular resj1/727  | 20/23843  | 0.461821 | 0.787715 | 0.775931 | Ly6g6d      |
| GO_BP_m4GO:200102 regulation 1/727    | 20/23843  | 0.461821 | 0.787715 | 0.775931 | Fgf4        |
| GO_BP_m4GO:00017E establishm1/2/727   | 51/23843  | 0.463435 | 0.787954 | 0.776166 | Astn2/Ror2  |
| GO_BP_m4GO:00064C mRNA exp1/2/727     | 51/23843  | 0.463435 | 0.787954 | 0.776166 | Srsf10/Tho  |
| GO_BP_m4GO:003361 membrane 2/727      | 51/23843  | 0.463435 | 0.787954 | 0.776166 | Adam19/Rh   |
| GO_BP_m4GO:004577 positive reC2/727   | 51/23843  | 0.463435 | 0.787954 | 0.776166 | Anapc2/Trp  |
| GO_BP_m4GO:004582 negative re2/727    | 51/23843  | 0.463435 | 0.787954 | 0.776166 | Dusp10/Se   |
| GO_BP_m4GO:005091 sensory pe 2/727    | 51/23843  | 0.463435 | 0.787954 | 0.776166 | Gnat1/Tas2  |
| GO_BP_m4GO:00650C intracellula 2/727  | 51/23843  | 0.463435 | 0.787954 | 0.776166 | Pex1/Tomr   |
| GO_BP_m4GO:007142 mRNA-cor 2/727      | 51/23843  | 0.463435 | 0.787954 | 0.776166 | Srsf10/Tho  |
| GO_BP_m4GO:190161 organic hyc14/727   | 437/23843 | 0.463444 | 0.787954 | 0.776166 | Abhd4/Akr   |
| GO_BP_m4GO:006082 regulation 7/727    | 211/23843 | 0.464345 | 0.788924 | 0.777121 | Ddit3/Folr1 |
| GO_BP_m4GO:007182 protein-D17/727     | 211/23843 | 0.464345 | 0.788924 | 0.777121 | Anp32b/Ce   |
| GO_BP_m4GO:00432C response tr6/727    | 179/23843 | 0.465351 | 0.790073 | 0.778253 | Mir155/Mir  |
| GO_BP_m4GO:009752 myeloid let6/727    | 179/23843 | 0.465351 | 0.790073 | 0.778253 | C3ar1/Lgal  |
| GO_BP_m4GO:00075E cell aging 5/727    | 147/23843 | 0.4662   | 0.790963 | 0.779129 | Mapk14/M    |
| GO_BP_m4GO:003462 cellular resj3/727  | 83/23843  | 0.466372 | 0.790963 | 0.779129 | Atf6b/Ddit  |
| GO_BP_m4GO:190187 regulation 3/727    | 83/23843  | 0.466372 | 0.790963 | 0.779129 | Nav3/Sptar  |
| GO_BP_m4GO:00018E liver develc4/727   | 115/23843 | 0.466704 | 0.790966 | 0.779132 | Aurka/Gak   |
| GO_BP_m4GO:001402 primary ne 4/727    | 115/23843 | 0.466704 | 0.790966 | 0.779132 | Bcl10/Folr1 |
| GO_BP_m4GO:00303E negative re8/727    | 244/23843 | 0.467843 | 0.792615 | 0.780757 | Ager/Dpep   |
| GO_BP_m4GO:00100E response tr14/727   | 439/23843 | 0.470284 | 0.795853 | 0.783947 | Apoa4/Aqr   |
| GO_BP_m4GO:00519E negative re11/727   | 342/23843 | 0.471523 | 0.795853 | 0.783947 | Cspg4/Ctnl  |
| GO_BP_m4GO:00063E chromatin 5/727     | 148/23843 | 0.472094 | 0.795853 | 0.783947 | Anp32b/Hf   |
| GO_BP_m4GO:00513C regulation 5/727    | 148/23843 | 0.472094 | 0.795853 | 0.783947 | Aurka/Fgf4  |
| GO_BP_m4GO:00156E ammonium 4/727      | 116/23843 | 0.473375 | 0.795853 | 0.783947 | Htr2c/Lgal  |
| GO_BP_m4GO:00071E establishm1/2/727   | 52/23843  | 0.473528 | 0.795853 | 0.783947 | Astn2/Ror2  |
| GO_BP_m4GO:00308E cortical cyt1/2/727 | 52/23843  | 0.473528 | 0.795853 | 0.783947 | Synpo/Wip   |
| GO_BP_m4GO:00433E negative re2/727    | 52/23843  | 0.473528 | 0.795853 | 0.783947 | Ddit3/Gata  |
| GO_BP_m4GO:00488C genitalia d1/2/727  | 52/23843  | 0.473528 | 0.795853 | 0.783947 | Esr2/Ror2   |
| GO_BP_m4GO:00507E negative re2/727    | 52/23843  | 0.473528 | 0.795853 | 0.783947 | Fam72a/Sc   |
| GO_BP_m4GO:005091 detection c2/727    | 52/23843  | 0.473528 | 0.795853 | 0.783947 | Gnat1/Tas2  |
| GO_BP_m4GO:005507 sodium ion2/727     | 52/23843  | 0.473528 | 0.795853 | 0.783947 | Atp1b4/Slc  |
| GO_BP_m4GO:00718C protein tra1/2/727  | 52/23843  | 0.473528 | 0.795853 | 0.783947 | Pex1/Tomr   |

|                                |        |           |          |          |          |              |
|--------------------------------|--------|-----------|----------|----------|----------|--------------|
| GO_BP_m4GO:000301muscle syst   | 12/727 | 375/23843 | 0.473596 | 0.795853 | 0.783947 | Cacna1g/D    |
| GO_BP_m4GO:000925ribonucleo    | 14/727 | 440/23843 | 0.473699 | 0.795853 | 0.783947 | Ak3/Atp5c    |
| GO_BP_m4GO:004513developme     | 7/727  | 213/23843 | 0.474164 | 0.795853 | 0.783947 | Brip1/Esr2/  |
| GO_BP_m4GO:190331regulation    | 7/727  | 213/23843 | 0.474164 | 0.795853 | 0.783947 | Nbas/Nelfe   |
| GO_BP_m4GO:003571CD4-positi    | 3/727  | 84/23843  | 0.474241 | 0.795853 | 0.783947 | Ager/Il27/   |
| GO_BP_m4GO:014002exocytic pr   | 3/727  | 84/23843  | 0.474241 | 0.795853 | 0.783947 | Rab40b/Sn    |
| GO_BP_m4GO:190101regulation    | 3/727  | 84/23843  | 0.474241 | 0.795853 | 0.783947 | Cbarp/Kcne   |
| GO_BP_m4GO:014001meiotic nur   | 6/727  | 181/23843 | 0.476013 | 0.795853 | 0.783947 | Cenps/Aurl   |
| GO_BP_m4GO:00467C heterocycl   | 14/727 | 441/23843 | 0.477111 | 0.795853 | 0.783947 | Aox3/Cnot    |
| GO_BP_m4GO:000224hematopoi     | 5/727  | 149/23843 | 0.477966 | 0.795853 | 0.783947 | Fst/Inhba/I  |
| GO_BP_m4GO:004866regulation    | 5/727  | 149/23843 | 0.477966 | 0.795853 | 0.783947 | Abcc4/Age    |
| GO_BP_m4GO:190316regulation    | 5/727  | 149/23843 | 0.477966 | 0.795853 | 0.783947 | Cbarp/Il13,  |
| GO_BP_m4GO:190547regulation    | 5/727  | 149/23843 | 0.477966 | 0.795853 | 0.783947 | Erbp2/Kcne   |
| GO_BP_m4GO:000042mitophagy     | 1/727  | 21/23843  | 0.478244 | 0.795853 | 0.783947 | Tomm7        |
| GO_BP_m4GO:000046maturation    | 1/727  | 21/23843  | 0.478244 | 0.795853 | 0.783947 | Eri2         |
| GO_BP_m4GO:001066epithelial s  | 1/727  | 21/23843  | 0.478244 | 0.795853 | 0.783947 | Ldb2         |
| GO_BP_m4GO:001086regulation    | 1/727  | 21/23843  | 0.478244 | 0.795853 | 0.783947 | Sik1         |
| GO_BP_m4GO:003116rRNA meth     | 1/727  | 21/23843  | 0.478244 | 0.795853 | 0.783947 | Mrm2         |
| GO_BP_m4GO:003129retinal gan   | 1/727  | 21/23843  | 0.478244 | 0.795853 | 0.783947 | Rpl24        |
| GO_BP_m4GO:003157mitotic G1    | 1/727  | 21/23843  | 0.478244 | 0.795853 | 0.783947 | Pidd1        |
| GO_BP_m4GO:003204mitochond     | 1/727  | 21/23843  | 0.478244 | 0.795853 | 0.783947 | Pid1         |
| GO_BP_m4GO:003314positive re   | 1/727  | 21/23843  | 0.478244 | 0.795853 | 0.783947 | Ube2i        |
| GO_BP_m4GO:003438low-densit    | 1/727  | 21/23843  | 0.478244 | 0.795853 | 0.783947 | Lipc         |
| GO_BP_m4GO:00363C lymph vess   | 1/727  | 21/23843  | 0.478244 | 0.795853 | 0.783947 | Nfatc1       |
| GO_BP_m4GO:004205regulation    | 1/727  | 21/23843  | 0.478244 | 0.795853 | 0.783947 | Htr2c        |
| GO_BP_m4GO:004245purine nucl   | 1/727  | 21/23843  | 0.478244 | 0.795853 | 0.783947 | Nme5         |
| GO_BP_m4GO:004315entrainmer    | 1/727  | 21/23843  | 0.478244 | 0.795853 | 0.783947 | Sik1         |
| GO_BP_m4GO:004427sulfur com    | 1/727  | 21/23843  | 0.478244 | 0.795853 | 0.783947 | Nudt7        |
| GO_BP_m4GO:004572positive re   | 1/727  | 21/23843  | 0.478244 | 0.795853 | 0.783947 | Apoa4        |
| GO_BP_m4GO:004612purine ribo   | 1/727  | 21/23843  | 0.478244 | 0.795853 | 0.783947 | Nme5         |
| GO_BP_m4GO:004632negative re   | 1/727  | 21/23843  | 0.478244 | 0.795853 | 0.783947 | Pid1         |
| GO_BP_m4GO:004663negative re   | 1/727  | 21/23843  | 0.478244 | 0.795853 | 0.783947 | Socs5        |
| GO_BP_m4GO:004824eosinophil    | 1/727  | 21/23843  | 0.478244 | 0.795853 | 0.783947 | Lgals3       |
| GO_BP_m4GO:007211cell prolifer | 1/727  | 21/23843  | 0.478244 | 0.795853 | 0.783947 | C3ar1        |
| GO_BP_m4GO:007264interferon-   | 1/727  | 21/23843  | 0.478244 | 0.795853 | 0.783947 | Mir155       |
| GO_BP_m4GO:190152positive re   | 1/727  | 21/23843  | 0.478244 | 0.795853 | 0.783947 | Rela         |
| GO_BP_m4GO:190174positive re   | 1/727  | 21/23843  | 0.478244 | 0.795853 | 0.783947 | Mapk14       |
| GO_BP_m4GO:190351release of    | 1/727  | 21/23843  | 0.478244 | 0.795853 | 0.783947 | Slc8a1       |
| GO_BP_m4GO:004578negative re   | 14/727 | 442/23843 | 0.48052  | 0.79818  | 0.786239 | Aurka/Btn2   |
| GO_BP_m4GO:003053adult beha    | 6/727  | 182/23843 | 0.48132  | 0.79818  | 0.786239 | Dmbx1/Htr    |
| GO_BP_m4GO:00439C negative re  | 6/727  | 182/23843 | 0.48132  | 0.79818  | 0.786239 | A230050P2    |
| GO_BP_m4GO:000236cytokine pr   | 3/727  | 85/23843  | 0.482056 | 0.79818  | 0.786239 | Ffar3/Gas6   |
| GO_BP_m4GO:00027C positive re  | 3/727  | 85/23843  | 0.482056 | 0.79818  | 0.786239 | Ffar3/Il13/I |
| GO_BP_m4GO:001607synaptic ve   | 3/727  | 85/23843  | 0.482056 | 0.79818  | 0.786239 | Rims4/Snaj   |
| GO_BP_m4GO:006039SMAD prot     | 3/727  | 85/23843  | 0.482056 | 0.79818  | 0.786239 | Inhba/Mir7   |
| GO_BP_m4GO:000994anterior/pc   | 2/727  | 53/23843  | 0.483506 | 0.79818  | 0.786239 | Aurka/Ddit   |
| GO_BP_m4GO:003004actin filam   | 2/727  | 53/23843  | 0.483506 | 0.79818  | 0.786239 | Sptan1/Tm    |
| GO_BP_m4GO:004253positive re   | 2/727  | 53/23843  | 0.483506 | 0.79818  | 0.786239 | Il13/Lck     |

|                   |              |        |           |          |         |          |             |
|-------------------|--------------|--------|-----------|----------|---------|----------|-------------|
| GO_BP_m4GO:004662 | positive re  | 2/727  | 53/23843  | 0.483506 | 0.79818 | 0.786239 | Mapk14/Pi   |
| GO_BP_m4GO:004806 | developme    | 2/727  | 53/23843  | 0.483506 | 0.79818 | 0.786239 | Mreg/Zeb2   |
| GO_BP_m4GO:004854 | digestive tr | 2/727  | 53/23843  | 0.483506 | 0.79818 | 0.786239 | Ovol2/Sox1  |
| GO_BP_m4GO:005099 | regulation   | 2/727  | 53/23843  | 0.483506 | 0.79818 | 0.786239 | Apoa4/Irs2  |
| GO_BP_m4GO:001635 | dendrite de  | 9/727  | 280/23843 | 0.483605 | 0.79818 | 0.786239 | Anapc2/Ar   |
| GO_BP_m4GO:005116 | nuclear ex   | 5/727  | 150/23843 | 0.483817 | 0.79818 | 0.786239 | Gas6/Rbm1   |
| GO_BP_m4GO:000166 | ameboidal    | 12/727 | 378/23843 | 0.48466  | 0.79818 | 0.786239 | Ager/Dusp   |
| GO_BP_m4GO:003030 | positive re  | 6/727  | 183/23843 | 0.486612 | 0.79818 | 0.786239 | Anapc2/Erf  |
| GO_BP_m4GO:000627 | regulation   | 4/727  | 118/23843 | 0.48662  | 0.79818 | 0.786239 | Hcrt/Hus1/  |
| GO_BP_m4GO:004646 | membrane     | 4/727  | 118/23843 | 0.48662  | 0.79818 | 0.786239 | A4galt/B3g  |
| GO_BP_m4GO:006004 | cardiac mu   | 4/727  | 118/23843 | 0.48662  | 0.79818 | 0.786239 | Cacna1g/D   |
| GO_BP_m4GO:006201 | negative re  | 4/727  | 118/23843 | 0.48662  | 0.79818 | 0.786239 | Acmsd/C1c   |
| GO_BP_m4GO:190113 | carbohydr    | 4/727  | 118/23843 | 0.48662  | 0.79818 | 0.786239 | Ctbs/Manb   |
| GO_BP_m4GO:190303 | negative re  | 4/727  | 118/23843 | 0.48662  | 0.79818 | 0.786239 | Btn2a2/Erb  |
| GO_BP_m4GO:000820 | steroid me   | 9/727  | 281/23843 | 0.487873 | 0.79818 | 0.786239 | Akr1d1/Ap   |
| GO_BP_m4GO:004578 | positive re  | 12/727 | 379/23843 | 0.488338 | 0.79818 | 0.786239 | Ager/Bcl10  |
| GO_BP_m4GO:001931 | hexose me    | 7/727  | 216/23843 | 0.488805 | 0.79818 | 0.786239 | Car5a/C1q   |
| GO_BP_m4GO:000183 | embryonic    | 5/727  | 151/23843 | 0.489645 | 0.79818 | 0.786239 | Bcl10/Folr1 |
| GO_BP_m4GO:004666 | male sex di  | 5/727  | 151/23843 | 0.489645 | 0.79818 | 0.786239 | Brip1/Esr2/ |
| GO_BP_m4GO:001922 | transmissi   | 3/727  | 86/23843  | 0.489815 | 0.79818 | 0.786239 | Cacna1g/C   |
| GO_BP_m4GO:003260 | chemokine    | 3/727  | 86/23843  | 0.489815 | 0.79818 | 0.786239 | Ager/Ffar3. |
| GO_BP_m4GO:004315 | negative re  | 3/727  | 86/23843  | 0.489815 | 0.79818 | 0.786239 | Dpep1/Gas   |
| GO_BP_m4GO:190321 | regulation   | 3/727  | 86/23843  | 0.489815 | 0.79818 | 0.786239 | Plagl2/Torr |
| GO_BP_m4GO:002241 | cellular cor | 11/727 | 347/23843 | 0.490792 | 0.79818 | 0.786239 | Dnase2b/E   |
| GO_BP_m4GO:000974 | response tr  | 6/727  | 184/23843 | 0.491886 | 0.79818 | 0.786239 | Ager/C1qtr  |
| GO_BP_m4GO:190198 | regulation   | 9/727  | 282/23843 | 0.492132 | 0.79818 | 0.786239 | Anp32b/Bt   |
| GO_BP_m4GO:004682 | regulation   | 4/727  | 119/23843 | 0.493191 | 0.79818 | 0.786239 | Gas6/Mapk   |
| GO_BP_m4GO:006138 | regulation   | 4/727  | 119/23843 | 0.493191 | 0.79818 | 0.786239 | Anapc2/Rti  |
| GO_BP_m4GO:000270 | negative re  | 2/727  | 54/23843  | 0.493366 | 0.79818 | 0.786239 | Muc4/Serp   |
| GO_BP_m4GO:004507 | negative re  | 2/727  | 54/23843  | 0.493366 | 0.79818 | 0.786239 | A230050P2   |
| GO_BP_m4GO:004671 | viral entry  | i2/727 | 54/23843  | 0.493366 | 0.79818 | 0.786239 | Gas6/Vamp   |
| GO_BP_m4GO:190406 | regulation   | 10/727 | 315/23843 | 0.493456 | 0.79818 | 0.786239 | Ager/Arc/C  |
| GO_BP_m4GO:009027 | regulation   | 7/727  | 217/23843 | 0.493659 | 0.79818 | 0.786239 | C1qtnf12/F  |
| GO_BP_m4GO:000002 | ribosomal    | 1/727  | 22/23843  | 0.494167 | 0.79818 | 0.786239 | Rps2        |
| GO_BP_m4GO:000027 | polysaccha   | 1/727  | 22/23843  | 0.494167 | 0.79818 | 0.786239 | Manba       |
| GO_BP_m4GO:000283 | regulation   | 1/727  | 22/23843  | 0.494167 | 0.79818 | 0.786239 | Muc4        |
| GO_BP_m4GO:000283 | regulation   | 1/727  | 22/23843  | 0.494167 | 0.79818 | 0.786239 | Muc4        |
| GO_BP_m4GO:000335 | epithelial   | c1/727 | 22/23843  | 0.494167 | 0.79818 | 0.786239 | Nme5        |
| GO_BP_m4GO:000683 | serotonin    | t1/727 | 22/23843  | 0.494167 | 0.79818 | 0.786239 | Lgals3      |
| GO_BP_m4GO:000706 | regulation   | 1/727  | 22/23843  | 0.494167 | 0.79818 | 0.786239 | Sfpq        |
| GO_BP_m4GO:000726 | nitric oxide | 1/727  | 22/23843  | 0.494167 | 0.79818 | 0.786239 | Mt1         |
| GO_BP_m4GO:000741 | axonal fasc  | 1/727  | 22/23843  | 0.494167 | 0.79818 | 0.786239 | Rtn4        |
| GO_BP_m4GO:000853 | respiratory  | 1/727  | 22/23843  | 0.494167 | 0.79818 | 0.786239 | Coa5        |
| GO_BP_m4GO:000964 | photoperic   | 1/727  | 22/23843  | 0.494167 | 0.79818 | 0.786239 | Sik1        |
| GO_BP_m4GO:001058 | miRNA me     | 1/727  | 22/23843  | 0.494167 | 0.79818 | 0.786239 | Rela        |
| GO_BP_m4GO:001088 | positive re  | 1/727  | 22/23843  | 0.494167 | 0.79818 | 0.786239 | Apoc4       |
| GO_BP_m4GO:001485 | response tr  | 1/727  | 22/23843  | 0.494167 | 0.79818 | 0.786239 | Mir709      |
| GO_BP_m4GO:001604 | detection    | c1/727 | 22/23843  | 0.494167 | 0.79818 | 0.786239 | Lxn         |

|                                      |           |          |          |          |             |
|--------------------------------------|-----------|----------|----------|----------|-------------|
| GO_BP_m4GO:001823peptidyl-L-1/727    | 22/23843  | 0.494167 | 0.79818  | 0.786239 | Zdhhc22     |
| GO_BP_m4GO:001823peptidyl-S-1/727    | 22/23843  | 0.494167 | 0.79818  | 0.786239 | Zdhhc22     |
| GO_BP_m4GO:002154subpallium 1/727    | 22/23843  | 0.494167 | 0.79818  | 0.786239 | Inhba       |
| GO_BP_m4GO:003025growth hor1/727     | 22/23843  | 0.494167 | 0.79818  | 0.786239 | Itsn1       |
| GO_BP_m4GO:00327Cnegative re1/727    | 22/23843  | 0.494167 | 0.79818  | 0.786239 | Nav3        |
| GO_BP_m4GO:00344Cresponse tr1/727    | 22/23843  | 0.494167 | 0.79818  | 0.786239 | Socs5       |
| GO_BP_m4GO:004206regulation 1/727    | 22/23843  | 0.494167 | 0.79818  | 0.786239 | Htr2c       |
| GO_BP_m4GO:004253benzene-c 1/727     | 22/23843  | 0.494167 | 0.79818  | 0.786239 | Kynu        |
| GO_BP_m4GO:004348histone exc1/727    | 22/23843  | 0.494167 | 0.79818  | 0.786239 | Anp32b      |
| GO_BP_m4GO:004349regulation 1/727    | 22/23843  | 0.494167 | 0.79818  | 0.786239 | Traf4       |
| GO_BP_m4GO:00447EG1 DNA d1/727       | 22/23843  | 0.494167 | 0.79818  | 0.786239 | Pidd1       |
| GO_BP_m4GO:004481mitotic G1/1/727    | 22/23843  | 0.494167 | 0.79818  | 0.786239 | Pidd1       |
| GO_BP_m4GO:004594positive re1/727    | 22/23843  | 0.494167 | 0.79818  | 0.786239 | Erbp2       |
| GO_BP_m4GO:006057intestinal e1/727   | 22/23843  | 0.494167 | 0.79818  | 0.786239 | Mir7-2      |
| GO_BP_m4GO:00606Cbranch elo1/727     | 22/23843  | 0.494167 | 0.79818  | 0.786239 | Spry2       |
| GO_BP_m4GO:00610Emyeloid let1/727    | 22/23843  | 0.494167 | 0.79818  | 0.786239 | Gas6        |
| GO_BP_m4GO:007024thymocyte 1/727     | 22/23843  | 0.494167 | 0.79818  | 0.786239 | Efna1       |
| GO_BP_m4GO:00714Ccellular res1/727   | 22/23843  | 0.494167 | 0.79818  | 0.786239 | Socs5       |
| GO_BP_m4GO:00714Eprotein loc1/727    | 22/23843  | 0.494167 | 0.79818  | 0.786239 | Spdl1       |
| GO_BP_m4GO:00719Emultivesicu1/727    | 22/23843  | 0.494167 | 0.79818  | 0.786239 | Rilp        |
| GO_BP_m4GO:007221regulation 1/727    | 22/23843  | 0.494167 | 0.79818  | 0.786239 | Ret         |
| GO_BP_m4GO:007257hepatocyte1/727     | 22/23843  | 0.494167 | 0.79818  | 0.786239 | Rps6ka1     |
| GO_BP_m4GO:007257epithelial c1/727   | 22/23843  | 0.494167 | 0.79818  | 0.786239 | Rps6ka1     |
| GO_BP_m4GO:010603neuron prc1/727     | 22/23843  | 0.494167 | 0.79818  | 0.786239 | Rtn4        |
| GO_BP_m4GO:190074positive re1/727    | 22/23843  | 0.494167 | 0.79818  | 0.786239 | Ager        |
| GO_BP_m4GO:190302positive re1/727    | 22/23843  | 0.494167 | 0.79818  | 0.786239 | Pxylp1      |
| GO_BP_m4GO:19033Cnegative re1/727    | 22/23843  | 0.494167 | 0.79818  | 0.786239 | Cbarp       |
| GO_BP_m4GO:190364regulation 1/727    | 22/23843  | 0.494167 | 0.79818  | 0.786239 | Ptpn23      |
| GO_BP_m4GO:190386positive re1/727    | 22/23843  | 0.494167 | 0.79818  | 0.786239 | Nedd4l      |
| GO_BP_m4GO:003313regulation 5/727    | 152/23843 | 0.495449 | 0.799981 | 0.788013 | Cnksr3/Gas  |
| GO_BP_m4GO:000693muscle cor9/727     | 283/23843 | 0.496382 | 0.801216 | 0.789229 | Cacna1g/D   |
| GO_BP_m4GO:003112RNA 3'-enr3/727     | 87/23843  | 0.497518 | 0.802507 | 0.790501 | Eri2/Nelfe/ |
| GO_BP_m4GO:003252response tr3/727    | 87/23843  | 0.497518 | 0.802507 | 0.790501 | Mest/Ret/F  |
| GO_BP_m4GO:00071EG-g-protein r7/727  | 218/23843 | 0.498499 | 0.80382  | 0.791794 | Ffar3/Gnat  |
| GO_BP_m4GO:003313positive re4/727    | 120/23843 | 0.499727 | 0.805528 | 0.793477 | Gas6/lfna1  |
| GO_BP_m4GO:005507calcium ior14/727   | 448/23843 | 0.500887 | 0.807125 | 0.79505  | Ager/C3ar1  |
| GO_BP_m4GO:009723cellular res5/727   | 153/23843 | 0.501229 | 0.807404 | 0.795325 | Apoa4/Mp    |
| GO_BP_m4GO:00066Cprotein tar10/727   | 317/23843 | 0.501493 | 0.807557 | 0.795476 | Ap1s3/Erbp  |
| GO_BP_m4GO:00003Ealternative 2/727   | 55/23843  | 0.503106 | 0.808329 | 0.796236 | Rbfox3/Sfp  |
| GO_BP_m4GO:00326Eregulation 2/727    | 55/23843  | 0.503106 | 0.808329 | 0.796236 | Nav3/Rps3   |
| GO_BP_m4GO:00380Epeptidyl-ty2/727    | 55/23843  | 0.503106 | 0.808329 | 0.796236 | Grb2/Lck    |
| GO_BP_m4GO:004657positive re2/727    | 55/23843  | 0.503106 | 0.808329 | 0.796236 | Erbp2/Rtn4  |
| GO_BP_m4GO:00989Cregulation 2/727    | 55/23843  | 0.503106 | 0.808329 | 0.796236 | Dsp/Ffar3   |
| GO_BP_m4GO:200077regulation 2/727    | 55/23843  | 0.503106 | 0.808329 | 0.796236 | Recq15/Trip |
| GO_BP_m4GO:00100Cglial cell dil7/727 | 219/23843 | 0.503325 | 0.808329 | 0.796236 | Ager/Dusp   |
| GO_BP_m4GO:00362Cresponse tr7/727    | 219/23843 | 0.503325 | 0.808329 | 0.796236 | Ager/Fndc1  |
| GO_BP_m4GO:000004transition n3/727   | 88/23843  | 0.505161 | 0.809173 | 0.797068 | Heph/Slc25  |
| GO_BP_m4GO:00305Cneutrophil 3/727    | 88/23843  | 0.505161 | 0.809173 | 0.797068 | C3ar1/Lgal  |

|                                       |           |          |          |          |             |
|---------------------------------------|-----------|----------|----------|----------|-------------|
| GO_BP_m4GO:004847oogenesis 3/727      | 88/23843  | 0.505161 | 0.809173 | 0.797068 | Aurka/Figla |
| GO_BP_m4GO:19026Cproton trar3/727     | 88/23843  | 0.505161 | 0.809173 | 0.797068 | Atp5c1/Atp  |
| GO_BP_m4GO:004477cell cycle p 12/727  | 384/23843 | 0.50664  | 0.809173 | 0.797068 | Anp32b/Bt   |
| GO_BP_m4GO:00486Esmooth mt5/727       | 154/23843 | 0.506982 | 0.809173 | 0.797068 | Abcc4/Age   |
| GO_BP_m4GO:19019Enegative re5/727     | 154/23843 | 0.506982 | 0.809173 | 0.797068 | Btn2a2/Hu   |
| GO_BP_m4GO:00027Cregulation 15/727    | 483/23843 | 0.508096 | 0.809173 | 0.797068 | Btn2a2/C1c  |
| GO_BP_m4GO:00031Eatrioventric1/727    | 23/23843  | 0.509605 | 0.809173 | 0.797068 | Efna1       |
| GO_BP_m4GO:00094Ctoxin metal1/727     | 23/23843  | 0.509605 | 0.809173 | 0.797068 | Cyp1a2      |
| GO_BP_m4GO:00190Cvirion asser1/727    | 23/23843  | 0.509605 | 0.809173 | 0.797068 | Rab43       |
| GO_BP_m4GO:002301signal tranç1/727    | 23/23843  | 0.509605 | 0.809173 | 0.797068 | Sox17       |
| GO_BP_m4GO:00302Cchondroitir1/727     | 23/23843  | 0.509605 | 0.809173 | 0.797068 | Spock3      |
| GO_BP_m4GO:00309Cnotochord 1/727      | 23/23843  | 0.509605 | 0.809173 | 0.797068 | Efna1       |
| GO_BP_m4GO:00320Cregulation 1/727     | 23/23843  | 0.509605 | 0.809173 | 0.797068 | Htr2c       |
| GO_BP_m4GO:003237positive reç1/727    | 23/23843  | 0.509605 | 0.809173 | 0.797068 | Abcb4       |
| GO_BP_m4GO:003237positive reç1/727    | 23/23843  | 0.509605 | 0.809173 | 0.797068 | Abcb4       |
| GO_BP_m4GO:00324Cpositive reç1/727    | 23/23843  | 0.509605 | 0.809173 | 0.797068 | Trabd2b     |
| GO_BP_m4GO:00326Cnegative re1/727     | 23/23843  | 0.509605 | 0.809173 | 0.797068 | Gas6        |
| GO_BP_m4GO:00341Cnegative re1/727     | 23/23843  | 0.509605 | 0.809173 | 0.797068 | Ager        |
| GO_BP_m4GO:00424Cthyroid hor1/727     | 23/23843  | 0.509605 | 0.809173 | 0.797068 | Duox2       |
| GO_BP_m4GO:00430Ccellular me 1/727    | 23/23843  | 0.509605 | 0.809173 | 0.797068 | Bhmt        |
| GO_BP_m4GO:00466Eresponse tr1/727     | 23/23843  | 0.509605 | 0.809173 | 0.797068 | Mt1         |
| GO_BP_m4GO:00482Cbehavioral 1/727     | 23/23843  | 0.509605 | 0.809173 | 0.797068 | Vwa1        |
| GO_BP_m4GO:00484Esympatheti1/727      | 23/23843  | 0.509605 | 0.809173 | 0.797068 | Erbp2       |
| GO_BP_m4GO:00487Canimal org.1/727     | 23/23843  | 0.509605 | 0.809173 | 0.797068 | Ret         |
| GO_BP_m4GO:00513Cmeiotic chr1/727     | 23/23843  | 0.509605 | 0.809173 | 0.797068 | Cenps       |
| GO_BP_m4GO:00519Cregulation 1/727     | 23/23843  | 0.509605 | 0.809173 | 0.797068 | Hcrt        |
| GO_BP_m4GO:00611EmRNA des1/727        | 23/23843  | 0.509605 | 0.809173 | 0.797068 | Zfp3611     |
| GO_BP_m4GO:00714Ccellular res1/727    | 23/23843  | 0.509605 | 0.809173 | 0.797068 | Kcne1       |
| GO_BP_m4GO:007167positive reç1/727    | 23/23843  | 0.509605 | 0.809173 | 0.797068 | Lgals3      |
| GO_BP_m4GO:009011COPII-coat1/727      | 23/23843  | 0.509605 | 0.809173 | 0.797068 | Sec13       |
| GO_BP_m4GO:009034negative re1/727     | 23/23843  | 0.509605 | 0.809173 | 0.797068 | Rbl1        |
| GO_BP_m4GO:190307negative re1/727     | 23/23843  | 0.509605 | 0.809173 | 0.797068 | Pid1        |
| GO_BP_m4GO:00510Cregulation 12/727    | 385/23843 | 0.51028  | 0.809977 | 0.797859 | Ager/Bcl10  |
| GO_BP_m4GO:004211T cell activç15/727  | 484/23843 | 0.511348 | 0.810472 | 0.798347 | Ager/Bcl10  |
| GO_BP_m4GO:005082protein sta 5/727    | 155/23843 | 0.512709 | 0.810472 | 0.798347 | Efna1/Pim1  |
| GO_BP_m4GO:00000Cprotein imç2/727     | 56/23843  | 0.512724 | 0.810472 | 0.798347 | Agap3/Gas   |
| GO_BP_m4GO:00017Eeye photor2/727      | 56/23843  | 0.512724 | 0.810472 | 0.798347 | Cabp4/Gna   |
| GO_BP_m4GO:000222innate immr 2/727    | 56/23843  | 0.512724 | 0.810472 | 0.798347 | Apoa4/AY7   |
| GO_BP_m4GO:002151ventral spir2/727    | 56/23843  | 0.512724 | 0.810472 | 0.798347 | Nkx6-2/Vs   |
| GO_BP_m4GO:00355Cnon-canon2/727       | 56/23843  | 0.512724 | 0.810472 | 0.798347 | Ror2/Tiam   |
| GO_BP_m4GO:00903Cregulation 2/727     | 56/23843  | 0.512724 | 0.810472 | 0.798347 | Mapk14/Rt   |
| GO_BP_m4GO:00066Cglycolipid r3/727    | 89/23843  | 0.512743 | 0.810472 | 0.798347 | A4galt/Pigj |
| GO_BP_m4GO:003647cell death i 3/727   | 89/23843  | 0.512743 | 0.810472 | 0.798347 | Nme5/Ripk   |
| GO_BP_m4GO:00466Cregulation 3/727     | 89/23843  | 0.512743 | 0.810472 | 0.798347 | Ager/Il27/S |
| GO_BP_m4GO:005502regulation 3/727     | 89/23843  | 0.512743 | 0.810472 | 0.798347 | Mapk14/M    |
| GO_BP_m4GO:002191neural tubeç6/727    | 188/23843 | 0.512796 | 0.810472 | 0.798347 | Bcl10/Folr1 |
| GO_BP_m4GO:005127negative re9/727     | 287/23843 | 0.51328  | 0.81097  | 0.798837 | Ager/Ctnna  |
| GO_BP_m4GO:00196Crebribose pho:14/727 | 452/23843 | 0.514366 | 0.812416 | 0.800262 | Ak3/Atp5c:  |

|                                |         |           |          |          |          |             |
|--------------------------------|---------|-----------|----------|----------|----------|-------------|
| GO_BP_m4GO:003019extracellular | 7/727   | 222/23843 | 0.517707 | 0.812696 | 0.800537 | Eln/Hpse2/  |
| GO_BP_m4GO:007123cellular res  | 6/727   | 189/23843 | 0.517974 | 0.812696 | 0.800537 | Mir7-2/Mir  |
| GO_BP_m4GO:000728spermatid     | 5/727   | 156/23843 | 0.518409 | 0.812696 | 0.800537 | Brip1/Catsp |
| GO_BP_m4GO:004688positive re   | 5/727   | 156/23843 | 0.518409 | 0.812696 | 0.800537 | C1qtnf12/It |
| GO_BP_m4GO:004856digestive tr  | 4/727   | 123/23843 | 0.519111 | 0.812696 | 0.800537 | Gata1/Mir7  |
| GO_BP_m4GO:000244myeloid let   | 3/727   | 90/23843  | 0.520264 | 0.812696 | 0.800537 | Dnase1/Il1  |
| GO_BP_m4GO:190288regulation    | 3/727   | 90/23843  | 0.520264 | 0.812696 | 0.800537 | Nme5/Ripk   |
| GO_BP_m4GO:190350liposacchar   | 3/727   | 90/23843  | 0.520264 | 0.812696 | 0.800537 | A4galt/Pigl |
| GO_BP_m4GO:000754sex differer  | 9/727   | 289/23843 | 0.521664 | 0.812696 | 0.800537 | Brip1/Dmrt  |
| GO_BP_m4GO:000914purine nuc    | 8/727   | 256/23843 | 0.521998 | 0.812696 | 0.800537 | Ak3/Atp5c   |
| GO_BP_m4GO:001046mesenchyr     | 2/727   | 57/23843  | 0.522218 | 0.812696 | 0.800537 | Fgf4/Irs2   |
| GO_BP_m4GO:001580acidic amin   | 2/727   | 57/23843  | 0.522218 | 0.812696 | 0.800537 | Slc17a8/Slc |
| GO_BP_m4GO:003026entry into    | 1/2/727 | 57/23843  | 0.522218 | 0.812696 | 0.800537 | Gas6/Vamp   |
| GO_BP_m4GO:004440entry into    | 1/2/727 | 57/23843  | 0.522218 | 0.812696 | 0.800537 | Gas6/Vamp   |
| GO_BP_m4GO:005180entry into    | 1/2/727 | 57/23843  | 0.522218 | 0.812696 | 0.800537 | Gas6/Vamp   |
| GO_BP_m4GO:005182entry into    | 1/2/727 | 57/23843  | 0.522218 | 0.812696 | 0.800537 | Gas6/Vamp   |
| GO_BP_m4GO:000694striated m    | 5/727   | 157/23843 | 0.52408  | 0.812696 | 0.800537 | Cacna1g/D   |
| GO_BP_m4GO:005077negative re   | 5/727   | 157/23843 | 0.52408  | 0.812696 | 0.800537 | Dusp10/Lg   |
| GO_BP_m4GO:000233mature B      | 1/727   | 24/23843  | 0.524572 | 0.812696 | 0.800537 | Nfatc1      |
| GO_BP_m4GO:000241immune re     | 1/727   | 24/23843  | 0.524572 | 0.812696 | 0.800537 | Muc4        |
| GO_BP_m4GO:000614purine nuc    | 1/727   | 24/23843  | 0.524572 | 0.812696 | 0.800537 | Aox3        |
| GO_BP_m4GO:000622pyrimidine    | 1/727   | 24/23843  | 0.524572 | 0.812696 | 0.800537 | Nme5        |
| GO_BP_m4GO:000630postreplica   | 1/727   | 24/23843  | 0.524572 | 0.812696 | 0.800537 | Polk        |
| GO_BP_m4GO:000720protein kin   | 1/727   | 24/23843  | 0.524572 | 0.812696 | 0.800537 | Hcrt        |
| GO_BP_m4GO:000906aspartate     | 1/727   | 24/23843  | 0.524572 | 0.812696 | 0.800537 | Bhmt        |
| GO_BP_m4GO:001057positive re   | 1/727   | 24/23843  | 0.524572 | 0.812696 | 0.800537 | C3ar1       |
| GO_BP_m4GO:001093regulation    | 1/727   | 24/23843  | 0.524572 | 0.812696 | 0.800537 | Ripk1       |
| GO_BP_m4GO:001570bicarbonat    | 1/727   | 24/23843  | 0.524572 | 0.812696 | 0.800537 | Car4        |
| GO_BP_m4GO:001819peptidyl-ar   | 1/727   | 24/23843  | 0.524572 | 0.812696 | 0.800537 | Prmt9       |
| GO_BP_m4GO:002180cerebral co   | 1/727   | 24/23843  | 0.524572 | 0.812696 | 0.800537 | Rtn4        |
| GO_BP_m4GO:002188olfactory b   | 1/727   | 24/23843  | 0.524572 | 0.812696 | 0.800537 | Mir200c     |
| GO_BP_m4GO:002203telencepha    | 1/727   | 24/23843  | 0.524572 | 0.812696 | 0.800537 | Rtn4        |
| GO_BP_m4GO:003072ovulation     | 1/727   | 24/23843  | 0.524572 | 0.812696 | 0.800537 | Inhba       |
| GO_BP_m4GO:003110animal org    | 1/727   | 24/23843  | 0.524572 | 0.812696 | 0.800537 | Aurka       |
| GO_BP_m4GO:003277positive re   | 1/727   | 24/23843  | 0.524572 | 0.812696 | 0.800537 | Cdh3        |
| GO_BP_m4GO:003352histone H2    | 1/727   | 24/23843  | 0.524572 | 0.812696 | 0.800537 | Trip12      |
| GO_BP_m4GO:004205negative re   | 1/727   | 24/23843  | 0.524572 | 0.812696 | 0.800537 | Socs5       |
| GO_BP_m4GO:004356regulation    | 1/727   | 24/23843  | 0.524572 | 0.812696 | 0.800537 | Cdh3        |
| GO_BP_m4GO:004504protein tar   | 1/727   | 24/23843  | 0.524572 | 0.812696 | 0.800537 | Folr1       |
| GO_BP_m4GO:004533phospholip    | 1/727   | 24/23843  | 0.524572 | 0.812696 | 0.800537 | Abcb4       |
| GO_BP_m4GO:004682negative re   | 1/727   | 24/23843  | 0.524572 | 0.812696 | 0.800537 | Gas6        |
| GO_BP_m4GO:004802negative re   | 1/727   | 24/23843  | 0.524572 | 0.812696 | 0.800537 | Srsf10      |
| GO_BP_m4GO:004867regulation    | 1/727   | 24/23843  | 0.524572 | 0.812696 | 0.800537 | Rtn4        |
| GO_BP_m4GO:005148negative re   | 1/727   | 24/23843  | 0.524572 | 0.812696 | 0.800537 | Slc8a1      |
| GO_BP_m4GO:005178response      | 1/727   | 24/23843  | 0.524572 | 0.812696 | 0.800537 | F12         |
| GO_BP_m4GO:005502negative re   | 1/727   | 24/23843  | 0.524572 | 0.812696 | 0.800537 | Mir1a-2     |
| GO_BP_m4GO:006021definitive    | h1/727  | 24/23843  | 0.524572 | 0.812696 | 0.800537 | Gata1       |
| GO_BP_m4GO:006100positive re   | 1/727   | 24/23843  | 0.524572 | 0.812696 | 0.800537 | Tiam1       |



|                                      |           |          |          |          |              |
|--------------------------------------|-----------|----------|----------|----------|--------------|
| GO_BP_m4GO:006111negative re1/727    | 24/23843  | 0.524572 | 0.812696 | 0.800537 | Mir1a-2      |
| GO_BP_m4GO:006143establishm1/727     | 24/23843  | 0.524572 | 0.812696 | 0.800537 | Gak          |
| GO_BP_m4GO:007058mitochond1/727      | 24/23843  | 0.524572 | 0.812696 | 0.800537 | Pid1         |
| GO_BP_m4GO:007139cellular res1/727   | 24/23843  | 0.524572 | 0.812696 | 0.800537 | Esr2         |
| GO_BP_m4GO:007157zinc ion tra1/727   | 24/23843  | 0.524572 | 0.812696 | 0.800537 | Slc39a8      |
| GO_BP_m4GO:007257liver morp1/727     | 24/23843  | 0.524572 | 0.812696 | 0.800537 | Rps6ka1      |
| GO_BP_m4GO:190173regulation 1/727    | 24/23843  | 0.524572 | 0.812696 | 0.800537 | Mapk14       |
| GO_BP_m4GO:190357negative re1/727    | 24/23843  | 0.524572 | 0.812696 | 0.800537 | Pid1         |
| GO_BP_m4GO:190464cellular res1/727   | 24/23843  | 0.524572 | 0.812696 | 0.800537 | Ager         |
| GO_BP_m4GO:190580negative re1/727    | 24/23843  | 0.524572 | 0.812696 | 0.800537 | Efna1        |
| GO_BP_m4GO:200117positive re1/727    | 24/23843  | 0.524572 | 0.812696 | 0.800537 | Pid1         |
| GO_BP_m4GO:007139cellular res4/727   | 124/23843 | 0.525493 | 0.81386  | 0.801684 | Ager/C1qtr   |
| GO_BP_m4GO:004688regulation 9/727    | 290/23843 | 0.525838 | 0.814129 | 0.801949 | C1qtnf12/F   |
| GO_BP_m4GO:000640RNA catabi7/727     | 224/23843 | 0.527211 | 0.815991 | 0.803783 | Cnot6/Eif3e  |
| GO_BP_m4GO:004544myoblast d3/727     | 91/23843  | 0.527721 | 0.816251 | 0.80404  | Ddit3/Map    |
| GO_BP_m4GO:190374regulation 3/727    | 91/23843  | 0.527721 | 0.816251 | 0.80404  | Plagl2/Tor   |
| GO_BP_m4GO:001631dephosphc11/727     | 357/23843 | 0.528799 | 0.817655 | 0.805422 | 4933415F2    |
| GO_BP_m4GO:000741synapse as5/727     | 158/23843 | 0.529722 | 0.818003 | 0.805766 | Flrt1/Lrrc4k |
| GO_BP_m4GO:007217epithelial ti5/727  | 158/23843 | 0.529722 | 0.818003 | 0.805766 | Bcl10/Folr1  |
| GO_BP_m4GO:000644regulation 2/727    | 58/23843  | 0.531587 | 0.818003 | 0.805766 | Mif4gd/Pp1   |
| GO_BP_m4GO:003083negative re2/727    | 58/23843  | 0.531587 | 0.818003 | 0.805766 | Sptan1/Tm    |
| GO_BP_m4GO:003283glomerulus2/727     | 58/23843  | 0.531587 | 0.818003 | 0.805766 | C3ar1/Ret    |
| GO_BP_m4GO:004209T-helper c2/727     | 58/23843  | 0.531587 | 0.818003 | 0.805766 | Il27/Socs5   |
| GO_BP_m4GO:004663regulation 2/727    | 58/23843  | 0.531587 | 0.818003 | 0.805766 | Il27/Socs5   |
| GO_BP_m4GO:005071negative re2/727    | 58/23843  | 0.531587 | 0.818003 | 0.805766 | Btn2a2/Ga    |
| GO_BP_m4GO:009018regulation 2/727    | 58/23843  | 0.531587 | 0.818003 | 0.805766 | C3ar1/Ret    |
| GO_BP_m4GO:190379positive re2/727    | 58/23843  | 0.531587 | 0.818003 | 0.805766 | Abcb4/Htr    |
| GO_BP_m4GO:003149chromatin 4/727     | 125/23843 | 0.531835 | 0.818003 | 0.805766 | Anp32b/Hp    |
| GO_BP_m4GO:003227positive re4/727    | 125/23843 | 0.531835 | 0.818003 | 0.805766 | Grb2/Nav3    |
| GO_BP_m4GO:000004autophago3/727      | 92/23843  | 0.535113 | 0.818003 | 0.805766 | 5330417C2    |
| GO_BP_m4GO:000640RNA expor3/727      | 92/23843  | 0.535113 | 0.818003 | 0.805766 | Rbm26/Srs    |
| GO_BP_m4GO:005501cardiac mu3/727     | 92/23843  | 0.535113 | 0.818003 | 0.805766 | Mapk14/M     |
| GO_BP_m4GO:000281regulation 5/727    | 159/23843 | 0.535335 | 0.818003 | 0.805766 | Ager/Dusp    |
| GO_BP_m4GO:000759blood coag5/727     | 159/23843 | 0.535335 | 0.818003 | 0.805766 | F12/F5/Gas   |
| GO_BP_m4GO:003529regulation 5/727    | 159/23843 | 0.535335 | 0.818003 | 0.805766 | Cacna1g/E    |
| GO_BP_m4GO:009774regulation 5/727    | 159/23843 | 0.535335 | 0.818003 | 0.805766 | Cacna1g/E    |
| GO_BP_m4GO:200125regulation 5/727    | 159/23843 | 0.535335 | 0.818003 | 0.805766 | Arc/Cbarp/   |
| GO_BP_m4GO:005104positive re15/727   | 492/23843 | 0.537161 | 0.818003 | 0.805766 | Cacna1b/C    |
| GO_BP_m4GO:007250cellular div.14/727 | 459/23843 | 0.537717 | 0.818003 | 0.805766 | C3ar1/Cacr   |
| GO_BP_m4GO:003017positive re4/727    | 126/23843 | 0.538134 | 0.818003 | 0.805766 | Lgr6/Ror2/   |
| GO_BP_m4GO:007139cellular res4/727   | 126/23843 | 0.538134 | 0.818003 | 0.805766 | Ager/C1qtr   |
| GO_BP_m4GO:190165cellular res4/727   | 126/23843 | 0.538134 | 0.818003 | 0.805766 | Mir155/Mir   |
| GO_BP_m4GO:004209gliogenesis9/727    | 293/23843 | 0.538283 | 0.818003 | 0.805766 | Ager/Cspg    |
| GO_BP_m4GO:003059leukocyte c6/727    | 193/23843 | 0.538463 | 0.818003 | 0.805766 | C3ar1/Gast   |
| GO_BP_m4GO:005165establishm6/727     | 193/23843 | 0.538463 | 0.818003 | 0.805766 | Cdh3/Mreg    |
| GO_BP_m4GO:005500muscle cell6/727    | 193/23843 | 0.538463 | 0.818003 | 0.805766 | Fhl2/Myom    |
| GO_BP_m4GO:000046cleavage in1/727    | 25/23843  | 0.539083 | 0.818003 | 0.805766 | Eri2         |
| GO_BP_m4GO:000307renal syste1/727    | 25/23843  | 0.539083 | 0.818003 | 0.805766 | Gas6         |

|                                     |           |          |          |          |            |
|-------------------------------------|-----------|----------|----------|----------|------------|
| GO_BP_m4GO:00159εenergy cou1/727    | 25/23843  | 0.539083 | 0.818003 | 0.805766 | Atp5c1     |
| GO_BP_m4GO:00159εATP synthe1/727    | 25/23843  | 0.539083 | 0.818003 | 0.805766 | Atp5c1     |
| GO_BP_m4GO:00301εpositive reç1/727  | 25/23843  | 0.539083 | 0.818003 | 0.805766 | F12        |
| GO_BP_m4GO:00328εreceptor cε1/727   | 25/23843  | 0.539083 | 0.818003 | 0.805766 | Kif16b     |
| GO_BP_m4GO:00328εnegative re1/727   | 25/23843  | 0.539083 | 0.818003 | 0.805766 | Irs2       |
| GO_BP_m4GO:00342εlipid transk1/727  | 25/23843  | 0.539083 | 0.818003 | 0.805766 | Abcb4      |
| GO_BP_m4GO:00354εresponse tr1/727   | 25/23843  | 0.539083 | 0.818003 | 0.805766 | Gas6       |
| GO_BP_m4GO:00359εsteroid hor1/727   | 25/23843  | 0.539083 | 0.818003 | 0.805766 | Inhba      |
| GO_BP_m4GO:00424εindole-con1/727    | 25/23843  | 0.539083 | 0.818003 | 0.805766 | Kynu       |
| GO_BP_m4GO:00433εpositive reç1/727  | 25/23843  | 0.539083 | 0.818003 | 0.805766 | Socs5      |
| GO_BP_m4GO:00463εmonosaccl1/727     | 25/23843  | 0.539083 | 0.818003 | 0.805766 | Nudt5      |
| GO_BP_m4GO:00507εRNA destal1/727    | 25/23843  | 0.539083 | 0.818003 | 0.805766 | Zfp36l1    |
| GO_BP_m4GO:00508εdefense re:1/727   | 25/23843  | 0.539083 | 0.818003 | 0.805766 | Mpo        |
| GO_BP_m4GO:00509εleukocyte t1/727   | 25/23843  | 0.539083 | 0.818003 | 0.805766 | Sell       |
| GO_BP_m4GO:00509εsensory pe1/727    | 25/23843  | 0.539083 | 0.818003 | 0.805766 | Lxn        |
| GO_BP_m4GO:00514εpositive reç1/727  | 25/23843  | 0.539083 | 0.818003 | 0.805766 | Rps2       |
| GO_BP_m4GO:00607εregulation 1/727   | 25/23843  | 0.539083 | 0.818003 | 0.805766 | Esr2       |
| GO_BP_m4GO:00714εhematopoi1/727     | 25/23843  | 0.539083 | 0.818003 | 0.805766 | Pim1       |
| GO_BP_m4GO:00720εglomerulus1/727    | 25/23843  | 0.539083 | 0.818003 | 0.805766 | C3ar1      |
| GO_BP_m4GO:00726εeosinophil 1/727   | 25/23843  | 0.539083 | 0.818003 | 0.805766 | Lgals3     |
| GO_BP_m4GO:00860εcell-cell sig1/727 | 25/23843  | 0.539083 | 0.818003 | 0.805766 | Cacna1g    |
| GO_BP_m4GO:00989εregulation 1/727   | 25/23843  | 0.539083 | 0.818003 | 0.805766 | Dsp        |
| GO_BP_m4GO:190004εpositive reç1/727 | 25/23843  | 0.539083 | 0.818003 | 0.805766 | F12        |
| GO_BP_m4GO:19011εnegative re1/727   | 25/23843  | 0.539083 | 0.818003 | 0.805766 | Socs5      |
| GO_BP_m4GO:19043εnegative re1/727   | 25/23843  | 0.539083 | 0.818003 | 0.805766 | Pid1       |
| GO_BP_m4GO:20000εregulation 1/727   | 25/23843  | 0.539083 | 0.818003 | 0.805766 | Tiam1      |
| GO_BP_m4GO:20005εnegative re1/727   | 25/23843  | 0.539083 | 0.818003 | 0.805766 | Socs5      |
| GO_BP_m4GO:00070εmicrotubul8/727    | 260/23843 | 0.539631 | 0.818003 | 0.805766 | Casc1/Ccdi |
| GO_BP_m4GO:00022εCD4-positi2/727    | 59/23843  | 0.54083  | 0.818003 | 0.805766 | Il27/Socs5 |
| GO_BP_m4GO:00024εinflammatic2/727   | 59/23843  | 0.54083  | 0.818003 | 0.805766 | Mir155/Ser |
| GO_BP_m4GO:00068εsuperoxide2/727    | 59/23843  | 0.54083  | 0.818003 | 0.805766 | Apoa4/Mp   |
| GO_BP_m4GO:00313εregulation 2/727   | 59/23843  | 0.54083  | 0.818003 | 0.805766 | Rundc1/Tb  |
| GO_BP_m4GO:00327εpositive reç2/727  | 59/23843  | 0.54083  | 0.818003 | 0.805766 | Ager/Ffar3 |
| GO_BP_m4GO:00456εnegative re2/727   | 59/23843  | 0.54083  | 0.818003 | 0.805766 | Nfatc1/Tnr |
| GO_BP_m4GO:00461εpurine ribo2/727   | 59/23843  | 0.54083  | 0.818003 | 0.805766 | Ak3/Nme5   |
| GO_BP_m4GO:00510εnegative re2/727   | 59/23843  | 0.54083  | 0.818003 | 0.805766 | Cgnl1/Spry |
| GO_BP_m4GO:00702εprotein trin2/727  | 59/23843  | 0.54083  | 0.818003 | 0.805766 | Atxn10/Mt  |
| GO_BP_m4GO:19035εmucopolys2/727     | 59/23843  | 0.54083  | 0.818003 | 0.805766 | Spock3/Xyl |
| GO_BP_m4GO:00322εmethylation10/727  | 327/23843 | 0.541104 | 0.818159 | 0.805919 | Bhmt/Cam   |
| GO_BP_m4GO:19035εregulation 7/727   | 227/23843 | 0.541331 | 0.818243 | 0.806002 | Cacna1b/C  |
| GO_BP_m4GO:00015εvasculogen3/727    | 93/23843  | 0.542439 | 0.818365 | 0.806122 | Ccm2/Sox1  |
| GO_BP_m4GO:00064εprotein lipi3/727  | 93/23843  | 0.542439 | 0.818365 | 0.806122 | Pigp/Pigv/ |
| GO_BP_m4GO:00070εmitochond3/727     | 93/23843  | 0.542439 | 0.818365 | 0.806122 | Chchd6/Cs  |
| GO_BP_m4GO:00107εnegative re3/727   | 93/23843  | 0.542439 | 0.818365 | 0.806122 | Efna1/Rtn4 |
| GO_BP_m4GO:00217εglial cell de3/727 | 93/23843  | 0.542439 | 0.818365 | 0.806122 | Ager/Nkx6  |
| GO_BP_m4GO:00302εnegative re3/727   | 93/23843  | 0.542439 | 0.818365 | 0.806122 | Gata1/Nfat |
| GO_BP_m4GO:00067εsulfur comı8/727   | 261/23843 | 0.544001 | 0.818514 | 0.806268 | Bhmt/Dpeç  |
| GO_BP_m4GO:00713εcellular resı4/727 | 127/23843 | 0.54439  | 0.818514 | 0.806268 | Ager/C1qtr |

|                                |        |           |          |          |          |              |
|--------------------------------|--------|-----------|----------|----------|----------|--------------|
| GO_BP_m4GO:000756aging         | 7/727  | 228/23843 | 0.545999 | 0.818514 | 0.806268 | Ager/Grb2,   |
| GO_BP_m4GO:000759hemostasis    | 5/727  | 161/23843 | 0.546466 | 0.818514 | 0.806268 | F12/F5/Gas   |
| GO_BP_m4GO:001072negative re   | 11/727 | 362/23843 | 0.547462 | 0.818514 | 0.806268 | Cspg4/Ctni   |
| GO_BP_m4GO:000157microtubul    | 3/727  | 94/23843  | 0.549698 | 0.818514 | 0.806268 | Ccdc114/M    |
| GO_BP_m4GO:004691cellular trar | 3/727  | 94/23843  | 0.549698 | 0.818514 | 0.806268 | Heph/Mt1/    |
| GO_BP_m4GO:005196regulation    | 3/727  | 94/23843  | 0.549698 | 0.818514 | 0.806268 | Flrt1/Lrrc4k |
| GO_BP_m4GO:19021Cnegative re   | 3/727  | 94/23843  | 0.549698 | 0.818514 | 0.806268 | Erbp2/Socs   |
| GO_BP_m4GO:003465nucleobase    | 12/727 | 396/23843 | 0.5498   | 0.818514 | 0.806268 | Cnot6/Dna    |
| GO_BP_m4GO:000151RNA methy     | 2/727  | 60/23843  | 0.549946 | 0.818514 | 0.806268 | Mrm2/Wdr     |
| GO_BP_m4GO:000229alpha-beta    | 2/727  | 60/23843  | 0.549946 | 0.818514 | 0.806268 | Il27/Socs5   |
| GO_BP_m4GO:00027Cregulation    | 2/727  | 60/23843  | 0.549946 | 0.818514 | 0.806268 | Ager/Muc4    |
| GO_BP_m4GO:003033DNA dama      | 2/727  | 60/23843  | 0.549946 | 0.818514 | 0.806268 | Pidd1/Smy    |
| GO_BP_m4GO:003369cellular pol  | 2/727  | 60/23843  | 0.549946 | 0.818514 | 0.806268 | B3gnt5/Irs2  |
| GO_BP_m4GO:003439protein loc   | 2/727  | 60/23843  | 0.549946 | 0.818514 | 0.806268 | Astn2/Ned    |
| GO_BP_m4GO:004477mitotic DN    | 2/727  | 60/23843  | 0.549946 | 0.818514 | 0.806268 | Hus1/Pidd:   |
| GO_BP_m4GO:007005intrinsic ap  | 2/727  | 60/23843  | 0.549946 | 0.818514 | 0.806268 | Ddit3/Ern2   |
| GO_BP_m4GO:000661protein ex    | 4/727  | 128/23843 | 0.550602 | 0.818514 | 0.806268 | Gas6/Srsf1   |
| GO_BP_m4GO:00092Cpurine ribo   | 4/727  | 128/23843 | 0.550602 | 0.818514 | 0.806268 | Ak3/Atp5c:   |
| GO_BP_m4GO:001021response tr   | 4/727  | 128/23843 | 0.550602 | 0.818514 | 0.806268 | Grb2/Hus1    |
| GO_BP_m4GO:004362cellular pro  | 4/727  | 128/23843 | 0.550602 | 0.818514 | 0.806268 | Gak/Nav3/    |
| GO_BP_m4GO:00224Cregulation    | 11/727 | 363/23843 | 0.551163 | 0.818514 | 0.806268 | Ager/Bcl10   |
| GO_BP_m4GO:003249response tr   | 11/727 | 363/23843 | 0.551163 | 0.818514 | 0.806268 | AY761184/    |
| GO_BP_m4GO:005126protein tet   | 5/727  | 162/23843 | 0.551984 | 0.818514 | 0.806268 | Decr1/Mbl    |
| GO_BP_m4GO:200124regulation    | 5/727  | 162/23843 | 0.551984 | 0.818514 | 0.806268 | Lck/Nme5/    |
| GO_BP_m4GO:00091Cglycoprote    | 8/727  | 263/23843 | 0.552689 | 0.818514 | 0.806268 | B3gnt5/Fut   |
| GO_BP_m4GO:00025Ctolerance ir  | 1/727  | 26/23843  | 0.553152 | 0.818514 | 0.806268 | C3ar1        |
| GO_BP_m4GO:000317atrioventric  | 1/727  | 26/23843  | 0.553152 | 0.818514 | 0.806268 | Efna1        |
| GO_BP_m4GO:000631mitotic rec   | 1/727  | 26/23843  | 0.553152 | 0.818514 | 0.806268 | Cenps        |
| GO_BP_m4GO:00070Cinner mitoc   | 1/727  | 26/23843  | 0.553152 | 0.818514 | 0.806268 | Chchd6       |
| GO_BP_m4GO:00080Emitochond     | 1/727  | 26/23843  | 0.553152 | 0.818514 | 0.806268 | Chchd6       |
| GO_BP_m4GO:000906glutamine     | 1/727  | 26/23843  | 0.553152 | 0.818514 | 0.806268 | Fah          |
| GO_BP_m4GO:001082negative re   | 1/727  | 26/23843  | 0.553152 | 0.818514 | 0.806268 | Pid1         |
| GO_BP_m4GO:002151spinal cord   | 1/727  | 26/23843  | 0.553152 | 0.818514 | 0.806268 | Nkx6-2       |
| GO_BP_m4GO:003081positive re   | 1/727  | 26/23843  | 0.553152 | 0.818514 | 0.806268 | Tshr         |
| GO_BP_m4GO:00325C DNA duple    | 1/727  | 26/23843  | 0.553152 | 0.818514 | 0.806268 | Recql5       |
| GO_BP_m4GO:003292regulation    | 1/727  | 26/23843  | 0.553152 | 0.818514 | 0.806268 | Fst          |
| GO_BP_m4GO:00345Ccentromer     | 1/727  | 26/23843  | 0.553152 | 0.818514 | 0.806268 | Cenps        |
| GO_BP_m4GO:00451Cintermedia    | 1/727  | 26/23843  | 0.553152 | 0.818514 | 0.806268 | Dsp          |
| GO_BP_m4GO:004511azole trans   | 1/727  | 26/23843  | 0.553152 | 0.818514 | 0.806268 | Vamp8        |
| GO_BP_m4GO:00457Epositive re   | 1/727  | 26/23843  | 0.553152 | 0.818514 | 0.806268 | Car2         |
| GO_BP_m4GO:00468Epositive re   | 1/727  | 26/23843  | 0.553152 | 0.818514 | 0.806268 | Car2         |
| GO_BP_m4GO:004852negative re   | 1/727  | 26/23843  | 0.553152 | 0.818514 | 0.806268 | Esr2         |
| GO_BP_m4GO:005092positive re   | 1/727  | 26/23843  | 0.553152 | 0.818514 | 0.806268 | Ager         |
| GO_BP_m4GO:00519Epositive re   | 1/727  | 26/23843  | 0.553152 | 0.818514 | 0.806268 | Htr2c        |
| GO_BP_m4GO:00519Epositive re   | 1/727  | 26/23843  | 0.553152 | 0.818514 | 0.806268 | Sfpq         |
| GO_BP_m4GO:006003pharyngeal    | 1/727  | 26/23843  | 0.553152 | 0.818514 | 0.806268 | Folr1        |
| GO_BP_m4GO:006006uterus dev    | 1/727  | 26/23843  | 0.553152 | 0.818514 | 0.806268 | Esr2         |
| GO_BP_m4GO:006021camera-tyr    | 1/727  | 26/23843  | 0.553152 | 0.818514 | 0.806268 | Cabp4        |

|                                                   |           |          |          |          |             |
|---------------------------------------------------|-----------|----------|----------|----------|-------------|
| GO_BP_m4GO:006036innervation1/727                 | 26/23843  | 0.553152 | 0.818514 | 0.806268 | Ret         |
| GO_BP_m4GO:006071labyrinthine1/727                | 26/23843  | 0.553152 | 0.818514 | 0.806268 | Ovol2       |
| GO_BP_m4GO:006131cell surface1/727                | 26/23843  | 0.553152 | 0.818514 | 0.806268 | Sox17       |
| GO_BP_m4GO:006143renal system1/727                | 26/23843  | 0.553152 | 0.818514 | 0.806268 | C3ar1       |
| GO_BP_m4GO:006144kidney vasculature1/727          | 26/23843  | 0.553152 | 0.818514 | 0.806268 | C3ar1       |
| GO_BP_m4GO:007029sarcomere1/727                   | 26/23843  | 0.553152 | 0.818514 | 0.806268 | Slc8a1      |
| GO_BP_m4GO:007154cellular respiration1/727        | 26/23843  | 0.553152 | 0.818514 | 0.806268 | Mir155      |
| GO_BP_m4GO:190107glucosaminoglycan1/727           | 26/23843  | 0.553152 | 0.818514 | 0.806268 | Ctbs        |
| GO_BP_m4GO:190336positive regulation of1/727      | 26/23843  | 0.553152 | 0.818514 | 0.806268 | Ptpn23      |
| GO_BP_m4GO:190464response to1/727                 | 26/23843  | 0.553152 | 0.818514 | 0.806268 | Ager        |
| GO_BP_m4GO:200017negative regulation of1/727      | 26/23843  | 0.553152 | 0.818514 | 0.806268 | Ctnna1      |
| GO_BP_m4GO:200031regulation of1/727               | 26/23843  | 0.553152 | 0.818514 | 0.806268 | Arc         |
| GO_BP_m4GO:000836regulation of6/727               | 196/23843 | 0.553581 | 0.818896 | 0.806645 | Akt1s1/Ank  |
| GO_BP_m4GO:005122positive regulation of14/727     | 464/23843 | 0.554178 | 0.819526 | 0.807265 | Erbp2/C1q   |
| GO_BP_m4GO:000184neural tube development4/727     | 129/23843 | 0.55677  | 0.821754 | 0.80946  | Bcl10/Folr1 |
| GO_BP_m4GO:000914purine nucleoside4/727           | 129/23843 | 0.55677  | 0.821754 | 0.80946  | Ak3/Atp5c   |
| GO_BP_m4GO:004867axon extension4/727              | 129/23843 | 0.55677  | 0.821754 | 0.80946  | Anapc2/Rtn  |
| GO_BP_m4GO:005083defense response4/727            | 129/23843 | 0.55677  | 0.821754 | 0.80946  | AY761184/   |
| GO_BP_m4GO:009753granulocyte development4/727     | 129/23843 | 0.55677  | 0.821754 | 0.80946  | C3ar1/Lgal  |
| GO_BP_m4GO:004325regulation of3/727               | 95/23843  | 0.556888 | 0.821754 | 0.80946  | C1qtnf12/Il |
| GO_BP_m4GO:004870oligodendrocyte3/727             | 95/23843  | 0.556888 | 0.821754 | 0.80946  | Dusp10/Erl  |
| GO_BP_m4GO:005081coagulation5/727                 | 163/23843 | 0.55747  | 0.822104 | 0.809805 | F12/F5/Gas  |
| GO_BP_m4GO:190054regulation of5/727               | 163/23843 | 0.55747  | 0.822104 | 0.809805 | Cap2/Gng2   |
| GO_BP_m4GO:000188endothelial cell2/727            | 61/23843  | 0.558933 | 0.822487 | 0.810182 | Abcb1b/Cc   |
| GO_BP_m4GO:000228alpha-beta2/727                  | 61/23843  | 0.558933 | 0.822487 | 0.810182 | Il27/Socs5  |
| GO_BP_m4GO:001083regulation of2/727               | 61/23843  | 0.558933 | 0.822487 | 0.810182 | Mapk14/Sil  |
| GO_BP_m4GO:001623positive regulation of2/727      | 61/23843  | 0.558933 | 0.822487 | 0.810182 | 5330417C2   |
| GO_BP_m4GO:003163zymogen activation2/727          | 61/23843  | 0.558933 | 0.822487 | 0.810182 | F12/Klk1b1  |
| GO_BP_m4GO:005077negative regulation of2/727      | 61/23843  | 0.558933 | 0.822487 | 0.810182 | Rtn4/Rtn4r  |
| GO_BP_m4GO:190305negative regulation of2/727      | 61/23843  | 0.558933 | 0.822487 | 0.810182 | Efn1/Pdcl   |
| GO_BP_m4GO:000181negative regulation of7/727      | 231/23843 | 0.559882 | 0.823629 | 0.811307 | Ager/Btn2a  |
| GO_BP_m4GO:006007canonical vesicle transport8/727 | 265/23843 | 0.561309 | 0.825474 | 0.813125 | Cdh3/Ddit3  |
| GO_BP_m4GO:009747synaptic vesicle4/727            | 130/23843 | 0.562891 | 0.826168 | 0.813808 | Rims4/Snap  |
| GO_BP_m4GO:004205T cell proliferation6/727        | 198/23843 | 0.563533 | 0.826168 | 0.813808 | Ager/Btn2a  |
| GO_BP_m4GO:000245T cell mediated3/727             | 96/23843  | 0.564009 | 0.826168 | 0.813808 | Ager/Muc4   |
| GO_BP_m4GO:000628regulation of3/727               | 96/23843  | 0.564009 | 0.826168 | 0.813808 | Recq15/Rps  |
| GO_BP_m4GO:000664triglyceride3/727                | 96/23843  | 0.564009 | 0.826168 | 0.813808 | Apoa4/Lipo  |
| GO_BP_m4GO:003031flagellated cell3/727            | 96/23843  | 0.564009 | 0.826168 | 0.813808 | Catsper2/N  |
| GO_BP_m4GO:004426cellular polypeptide3/727        | 96/23843  | 0.564009 | 0.826168 | 0.813808 | B3gnt5/Irs2 |
| GO_BP_m4GO:190503autophagosome3/727               | 96/23843  | 0.564009 | 0.826168 | 0.813808 | 5330417C2   |
| GO_BP_m4GO:000234response to1/727                 | 27/23843  | 0.566791 | 0.826168 | 0.813808 | Muc4        |
| GO_BP_m4GO:001080regulation of1/727               | 27/23843  | 0.566791 | 0.826168 | 0.813808 | Gas6        |
| GO_BP_m4GO:003087thyroid gland1/727               | 27/23843  | 0.566791 | 0.826168 | 0.813808 | Duox2       |
| GO_BP_m4GO:003163plasminogen activation1/727      | 27/23843  | 0.566791 | 0.826168 | 0.813808 | F12         |
| GO_BP_m4GO:003236negative regulation of1/727      | 27/23843  | 0.566791 | 0.826168 | 0.813808 | Irs2        |
| GO_BP_m4GO:003281positive regulation of1/727      | 27/23843  | 0.566791 | 0.826168 | 0.813808 | Gas6        |
| GO_BP_m4GO:003313negative regulation of1/727      | 27/23843  | 0.566791 | 0.826168 | 0.813808 | Cnksr3      |
| GO_BP_m4GO:003466ncRNA catalytic1/727             | 27/23843  | 0.566791 | 0.826168 | 0.813808 | Ern2        |

|                                     |           |          |          |          |             |
|-------------------------------------|-----------|----------|----------|----------|-------------|
| GO_BP_m4GO:003533peptidyl-ty1/727   | 27/23843  | 0.566791 | 0.826168 | 0.813808 | Dusp10      |
| GO_BP_m4GO:004211neutrophil 1/727   | 27/23843  | 0.566791 | 0.826168 | 0.813808 | Dnase1      |
| GO_BP_m4GO:004566positive re1/727   | 27/23843  | 0.566791 | 0.826168 | 0.813808 | Mapk14      |
| GO_BP_m4GO:005092regulation 1/727   | 27/23843  | 0.566791 | 0.826168 | 0.813808 | Ager        |
| GO_BP_m4GO:006014positive re1/727   | 27/23843  | 0.566791 | 0.826168 | 0.813808 | Mapk14      |
| GO_BP_m4GO:007026necroptotic1/727   | 27/23843  | 0.566791 | 0.826168 | 0.813808 | Ripk1       |
| GO_BP_m4GO:007097protein K11/727    | 27/23843  | 0.566791 | 0.826168 | 0.813808 | Anapc2      |
| GO_BP_m4GO:009010cochlea mc1/727    | 27/23843  | 0.566791 | 0.826168 | 0.813808 | Tshr        |
| GO_BP_m4GO:009020positive re1/727   | 27/23843  | 0.566791 | 0.826168 | 0.813808 | Wdr35       |
| GO_BP_m4GO:009020positive re1/727   | 27/23843  | 0.566791 | 0.826168 | 0.813808 | Apoa4       |
| GO_BP_m4GO:009907regulation 1/727   | 27/23843  | 0.566791 | 0.826168 | 0.813808 | Snap47      |
| GO_BP_m4GO:190289positive re1/727   | 27/23843  | 0.566791 | 0.826168 | 0.813808 | Rela        |
| GO_BP_m4GO:200030regulation 1/727   | 27/23843  | 0.566791 | 0.826168 | 0.813808 | Rims4       |
| GO_BP_m4GO:004244pigment m2/727     | 62/23843  | 0.567792 | 0.826618 | 0.814252 | Cdh3/Zeb2   |
| GO_BP_m4GO:005105positive re2/727   | 62/23843  | 0.567792 | 0.826618 | 0.814252 | Erbp2/Rtn4  |
| GO_BP_m4GO:005192negative re2/727   | 62/23843  | 0.567792 | 0.826618 | 0.814252 | Cbrp/Rerr   |
| GO_BP_m4GO:200037negative re2/727   | 62/23843  | 0.567792 | 0.826618 | 0.814252 | Esr2/Wdr3   |
| GO_BP_m4GO:190303regulation 5/727   | 165/23843 | 0.568339 | 0.827162 | 0.814788 | Ager/Dusp   |
| GO_BP_m4GO:000920ribonucleo4/727    | 131/23843 | 0.568967 | 0.82753  | 0.81515  | Ak3/Atp5c   |
| GO_BP_m4GO:005507transition n4/727  | 131/23843 | 0.568967 | 0.82753  | 0.81515  | Heph/Mt1    |
| GO_BP_m4GO:002241cellular prc11/727 | 368/23843 | 0.569494 | 0.82753  | 0.81515  | Aurka/Brip  |
| GO_BP_m4GO:000688regulation 3/727   | 97/23843  | 0.57106  | 0.82753  | 0.81515  | Car2/Car4   |
| GO_BP_m4GO:004312positive re3/727   | 97/23843  | 0.57106  | 0.82753  | 0.81515  | Rela/Ripk1  |
| GO_BP_m4GO:004852negative re3/727   | 97/23843  | 0.57106  | 0.82753  | 0.81515  | A230050P2   |
| GO_BP_m4GO:000270regulation 6/727   | 200/23843 | 0.573377 | 0.82753  | 0.81515  | Ager/Dnas   |
| GO_BP_m4GO:005125protein pol8/727   | 268/23843 | 0.574102 | 0.82753  | 0.81515  | Arhgap18    |
| GO_BP_m4GO:000279positive re9/727   | 302/23843 | 0.57485  | 0.82753  | 0.81515  | C1qtnf12/Il |
| GO_BP_m4GO:000985determinat4/727    | 132/23843 | 0.574995 | 0.82753  | 0.81515  | Ddit3/Folr1 |
| GO_BP_m4GO:003121biomineral 4/727   | 132/23843 | 0.574995 | 0.82753  | 0.81515  | Duox2/Gas   |
| GO_BP_m4GO:000931oligosacchi2/727   | 63/23843  | 0.576522 | 0.82753  | 0.81515  | Ctbs/Mogs   |
| GO_BP_m4GO:000998cell-cell rec2/727 | 63/23843  | 0.576522 | 0.82753  | 0.81515  | Astl/Lgals3 |
| GO_BP_m4GO:003262interleukin 2/727  | 63/23843  | 0.576522 | 0.82753  | 0.81515  | Nav3/Rps3   |
| GO_BP_m4GO:004545cell redox t2/727  | 63/23843  | 0.576522 | 0.82753  | 0.81515  | Ddit3/Tmx   |
| GO_BP_m4GO:001624regulation 3/727   | 98/23843  | 0.57804  | 0.82753  | 0.81515  | 5330417C2   |
| GO_BP_m4GO:004215lipoprotein 3/727  | 98/23843  | 0.57804  | 0.82753  | 0.81515  | Pigp/Pigv   |
| GO_BP_m4GO:004231vasoconstr3/727    | 98/23843  | 0.57804  | 0.82753  | 0.81515  | Cacna1g/H   |
| GO_BP_m4GO:007138cellular res6/727  | 201/23843 | 0.578259 | 0.82753  | 0.81515  | Esr2/Mir15  |
| GO_BP_m4GO:004851rhythmic p 8/727   | 269/23843 | 0.578329 | 0.82753  | 0.81515  | Erbp2/Esr2  |
| GO_BP_m4GO:005123maintenan9/727     | 303/23843 | 0.578835 | 0.82753  | 0.81515  | Apoc4/Ddi   |
| GO_BP_m4GO:000610regulation 5/727   | 167/23843 | 0.57907  | 0.82753  | 0.81515  | C1qtnf12/Il |
| GO_BP_m4GO:000974response tr5/727   | 167/23843 | 0.57907  | 0.82753  | 0.81515  | Ager/C1qtr  |
| GO_BP_m4GO:001972calcium-m5/727     | 167/23843 | 0.57907  | 0.82753  | 0.81515  | Grm1/Mir1   |
| GO_BP_m4GO:000073DNA synth 1/727    | 28/23843  | 0.580015 | 0.82753  | 0.81515  | Polk        |
| GO_BP_m4GO:000183blastocyst t1/727  | 28/23843  | 0.580015 | 0.82753  | 0.81515  | Ncapg2      |
| GO_BP_m4GO:000194lymph vess1/727    | 28/23843  | 0.580015 | 0.82753  | 0.81515  | Nfatc1      |
| GO_BP_m4GO:000202response tr1/727   | 28/23843  | 0.580015 | 0.82753  | 0.81515  | Slc25a25    |
| GO_BP_m4GO:000223positive re1/727   | 28/23843  | 0.580015 | 0.82753  | 0.81515  | Il27        |
| GO_BP_m4GO:000597regulation 1/727   | 28/23843  | 0.580015 | 0.82753  | 0.81515  | Irs2        |

|                               |         |           |          |          |          |             |
|-------------------------------|---------|-----------|----------|----------|----------|-------------|
| GO_BP_m4GO:000602aminoglyc    | 1/727   | 28/23843  | 0.580015 | 0.82753  | 0.81515  | Ctbs        |
| GO_BP_m4GO:000676folic acid-c | 1/727   | 28/23843  | 0.580015 | 0.82753  | 0.81515  | Folr1       |
| GO_BP_m4GO:00093CrRNA trans   | 1/727   | 28/23843  | 0.580015 | 0.82753  | 0.81515  | Npm3        |
| GO_BP_m4GO:001045exit from r  | 1/727   | 28/23843  | 0.580015 | 0.82753  | 0.81515  | Rpl24       |
| GO_BP_m4GO:001096regulation   | 1/727   | 28/23843  | 0.580015 | 0.82753  | 0.81515  | Irs2        |
| GO_BP_m4GO:001599ATP hydrol   | 1/727   | 28/23843  | 0.580015 | 0.82753  | 0.81515  | Atp6v1e2    |
| GO_BP_m4GO:001624negative re  | 1/727   | 28/23843  | 0.580015 | 0.82753  | 0.81515  | Sec22b      |
| GO_BP_m4GO:002151spinal cord  | 1/727   | 28/23843  | 0.580015 | 0.82753  | 0.81515  | Nkx6-2      |
| GO_BP_m4GO:002187forebrain r  | 1/727   | 28/23843  | 0.580015 | 0.82753  | 0.81515  | Fezf1       |
| GO_BP_m4GO:002195central ner  | 1/727   | 28/23843  | 0.580015 | 0.82753  | 0.81515  | Zeb2        |
| GO_BP_m4GO:003129replication  | 1/727   | 28/23843  | 0.580015 | 0.82753  | 0.81515  | Cenps       |
| GO_BP_m4GO:003315regulation   | 1/727   | 28/23843  | 0.580015 | 0.82753  | 0.81515  | Gas6        |
| GO_BP_m4GO:003356regulation   | 1/727   | 28/23843  | 0.580015 | 0.82753  | 0.81515  | Gak         |
| GO_BP_m4GO:003502positive re  | 1/727   | 28/23843  | 0.580015 | 0.82753  | 0.81515  | Rtn4r       |
| GO_BP_m4GO:003576endothelial  | 1/727   | 28/23843  | 0.580015 | 0.82753  | 0.81515  | Fgf4        |
| GO_BP_m4GO:004355positive re  | 1/727   | 28/23843  | 0.580015 | 0.82753  | 0.81515  | Tnfaip8l3   |
| GO_BP_m4GO:004368post-transl  | 1/727   | 28/23843  | 0.580015 | 0.82753  | 0.81515  | Stt3b       |
| GO_BP_m4GO:00440Cmodificatic  | 1/727   | 28/23843  | 0.580015 | 0.82753  | 0.81515  | Serpinb9    |
| GO_BP_m4GO:004591negative re  | 1/727   | 28/23843  | 0.580015 | 0.82753  | 0.81515  | Recql5      |
| GO_BP_m4GO:004599negative re  | 1/727   | 28/23843  | 0.580015 | 0.82753  | 0.81515  | Sox17       |
| GO_BP_m4GO:005082positive re  | 1/727   | 28/23843  | 0.580015 | 0.82753  | 0.81515  | F12         |
| GO_BP_m4GO:005112regulation   | 1/727   | 28/23843  | 0.580015 | 0.82753  | 0.81515  | Wipf2       |
| GO_BP_m4GO:005135negative re  | 1/727   | 28/23843  | 0.580015 | 0.82753  | 0.81515  | Il13        |
| GO_BP_m4GO:005164centrosom    | 1/727   | 28/23843  | 0.580015 | 0.82753  | 0.81515  | Aurka       |
| GO_BP_m4GO:006003pericardiur  | 1/727   | 28/23843  | 0.580015 | 0.82753  | 0.81515  | Ccm2        |
| GO_BP_m4GO:006044branching    | 1/727   | 28/23843  | 0.580015 | 0.82753  | 0.81515  | Vdr         |
| GO_BP_m4GO:007135cellular res | 1/727   | 28/23843  | 0.580015 | 0.82753  | 0.81515  | Rps2        |
| GO_BP_m4GO:007239signal trans | 1/727   | 28/23843  | 0.580015 | 0.82753  | 0.81515  | Pidd1       |
| GO_BP_m4GO:00724Csignal trans | 1/727   | 28/23843  | 0.580015 | 0.82753  | 0.81515  | Pidd1       |
| GO_BP_m4GO:007242signal trans | 1/727   | 28/23843  | 0.580015 | 0.82753  | 0.81515  | Pidd1       |
| GO_BP_m4GO:007259establishm   | 1/727   | 28/23843  | 0.580015 | 0.82753  | 0.81515  | Folr1       |
| GO_BP_m4GO:009066ATP hydrol   | 1/727   | 28/23843  | 0.580015 | 0.82753  | 0.81515  | Atp6v1e2    |
| GO_BP_m4GO:009913ATP hydrol   | 1/727   | 28/23843  | 0.580015 | 0.82753  | 0.81515  | Atp6v1e2    |
| GO_BP_m4GO:009913ATP hydrol   | 1/727   | 28/23843  | 0.580015 | 0.82753  | 0.81515  | Atp6v1e2    |
| GO_BP_m4GO:19028Cregulation   | 1/727   | 28/23843  | 0.580015 | 0.82753  | 0.81515  | Rims4       |
| GO_BP_m4GO:200019regulation   | 1/727   | 28/23843  | 0.580015 | 0.82753  | 0.81515  | Irs2        |
| GO_BP_m4GO:000979specificatio | 4/727   | 133/23843 | 0.580975 | 0.828651 | 0.816254 | Ddit3/Folr1 |
| GO_BP_m4GO:000652cellular am  | 8/727   | 270/23843 | 0.582536 | 0.830383 | 0.81796  | Bhmt/Dalrc  |
| GO_BP_m4GO:000728germ cell    | 8/727   | 270/23843 | 0.582536 | 0.830383 | 0.81796  | Aurka/Brip  |
| GO_BP_m4GO:004883inner ear    | d 6/727 | 202/23843 | 0.583112 | 0.830956 | 0.818524 | Anp32b/Cc   |
| GO_BP_m4GO:001922cytokine-nr  | 11/727  | 372/23843 | 0.583937 | 0.831095 | 0.818662 | Duox2/Flrt  |
| GO_BP_m4GO:00068Cxenobiotic   | 3/727   | 99/23843  | 0.584948 | 0.831095 | 0.818662 | Cyp1a2/Cy   |
| GO_BP_m4GO:001939fatty acid   | 8/727   | 99/23843  | 0.584948 | 0.831095 | 0.818662 | Decr1/Irs2/ |
| GO_BP_m4GO:004203regulation   | 3/727   | 99/23843  | 0.584948 | 0.831095 | 0.818662 | Bcl10/Il27/ |
| GO_BP_m4GO:00017Cmesoderm     | 2/727   | 64/23843  | 0.585122 | 0.831095 | 0.818662 | Inhba/Sox1  |
| GO_BP_m4GO:000756embryo im    | 2/727   | 64/23843  | 0.585122 | 0.831095 | 0.818662 | Mirlet7c-2/ |
| GO_BP_m4GO:003081positive re  | 2/727   | 64/23843  | 0.585122 | 0.831095 | 0.818662 | Pid1/Tshr   |
| GO_BP_m4GO:003139negative re  | 2/727   | 64/23843  | 0.585122 | 0.831095 | 0.818662 | Rps3/Trip1  |

|                                     |           |          |          |          |            |
|-------------------------------------|-----------|----------|----------|----------|------------|
| GO_BP_m4GO:004827vesicle doc2/727   | 64/23843  | 0.585122 | 0.831095 | 0.818662 | Rab40b/St  |
| GO_BP_m4GO:190037positive reç2/727  | 64/23843  | 0.585122 | 0.831095 | 0.818662 | Pid1/Tshr  |
| GO_BP_m4GO:199054mitochond2/727     | 64/23843  | 0.585122 | 0.831095 | 0.818662 | Slc25a37/T |
| GO_BP_m4GO:000206epithelial c7/727  | 237/23843 | 0.587059 | 0.832736 | 0.820277 | Abcb1b/Bf  |
| GO_BP_m4GO:003025lipid modif6/727   | 203/23843 | 0.587936 | 0.832736 | 0.820277 | Apoa4/Dec  |
| GO_BP_m4GO:000189placenta d5/727    | 169/23843 | 0.589657 | 0.832736 | 0.820277 | Grb2/Mapl  |
| GO_BP_m4GO:000226myeloid ce5/727    | 169/23843 | 0.589657 | 0.832736 | 0.820277 | Gata1/Hep  |
| GO_BP_m4GO:001077positive reç5/727  | 169/23843 | 0.589657 | 0.832736 | 0.820277 | Anapc2/Rtu |
| GO_BP_m4GO:000691nucleocyto9/727    | 306/23843 | 0.590688 | 0.832736 | 0.820277 | Agap3/Anç  |
| GO_BP_m4GO:004665lymphocyte9/727    | 306/23843 | 0.590688 | 0.832736 | 0.820277 | Ager/Btn2a |
| GO_BP_m4GO:004274defense re:13/727  | 442/23843 | 0.592119 | 0.832736 | 0.820277 | AY761184/  |
| GO_BP_m4GO:007064protein mo4/727    | 135/23843 | 0.592789 | 0.832736 | 0.820277 | Cops2/Otu  |
| GO_BP_m4GO:009730response tr4/727   | 135/23843 | 0.592789 | 0.832736 | 0.820277 | Ctnna1/Inh |
| GO_BP_m4GO:190495positive reç14/727 | 476/23843 | 0.592791 | 0.832736 | 0.820277 | Erbp2/C1q  |
| GO_BP_m4GO:000047maturation1/727    | 29/23843  | 0.592836 | 0.832736 | 0.820277 | Rpl711     |
| GO_BP_m4GO:000155oocyte ma1/727     | 29/23843  | 0.592836 | 0.832736 | 0.820277 | Aurka      |
| GO_BP_m4GO:000191regulation 1/727   | 29/23843  | 0.592836 | 0.832736 | 0.820277 | Kif16b     |
| GO_BP_m4GO:000243acute inflar1/727  | 29/23843  | 0.592836 | 0.832736 | 0.820277 | Serpinb9   |
| GO_BP_m4GO:000682zinc ion tra1/727  | 29/23843  | 0.592836 | 0.832736 | 0.820277 | Slc39a8    |
| GO_BP_m4GO:000690vesicle targ1/727  | 29/23843  | 0.592836 | 0.832736 | 0.820277 | Tmed10     |
| GO_BP_m4GO:000915purine ribo1/727   | 29/23843  | 0.592836 | 0.832736 | 0.820277 | Nudt7      |
| GO_BP_m4GO:000926ribonucleoi1/727   | 29/23843  | 0.592836 | 0.832736 | 0.820277 | Nudt7      |
| GO_BP_m4GO:001092positive reç1/727  | 29/23843  | 0.592836 | 0.832736 | 0.820277 | Ppp1r15b   |
| GO_BP_m4GO:003278positive reç1/727  | 29/23843  | 0.592836 | 0.832736 | 0.820277 | Thoc5      |
| GO_BP_m4GO:003311negative re1/727   | 29/23843  | 0.592836 | 0.832736 | 0.820277 | Srsf10     |
| GO_BP_m4GO:003426negative re1/727   | 29/23843  | 0.592836 | 0.832736 | 0.820277 | Spry2      |
| GO_BP_m4GO:003588vascular sr1/727   | 29/23843  | 0.592836 | 0.832736 | 0.820277 | Sgcb       |
| GO_BP_m4GO:004518regulation 1/727   | 29/23843  | 0.592836 | 0.832736 | 0.820277 | Hctr1      |
| GO_BP_m4GO:004567positive reç1/727  | 29/23843  | 0.592836 | 0.832736 | 0.820277 | Car2       |
| GO_BP_m4GO:004864positive reç1/727  | 29/23843  | 0.592836 | 0.832736 | 0.820277 | Sox17      |
| GO_BP_m4GO:005108chaperone 1/727    | 29/23843  | 0.592836 | 0.832736 | 0.820277 | Dnajb14    |
| GO_BP_m4GO:006057morphoge1/727      | 29/23843  | 0.592836 | 0.832736 | 0.820277 | Ovol2      |
| GO_BP_m4GO:006103positive reç1/727  | 29/23843  | 0.592836 | 0.832736 | 0.820277 | Rela       |
| GO_BP_m4GO:006175leukocyte 1/727    | 29/23843  | 0.592836 | 0.832736 | 0.820277 | Sell       |
| GO_BP_m4GO:007154response tr1/727   | 29/23843  | 0.592836 | 0.832736 | 0.820277 | Mir155     |
| GO_BP_m4GO:007252pyrimidine 1/727   | 29/23843  | 0.592836 | 0.832736 | 0.820277 | Nme5       |
| GO_BP_m4GO:190348regulation 1/727   | 29/23843  | 0.592836 | 0.832736 | 0.820277 | Oas2       |
| GO_BP_m4GO:190403positive reç1/727  | 29/23843  | 0.592836 | 0.832736 | 0.820277 | Ager       |
| GO_BP_m4GO:200051positive reç1/727  | 29/23843  | 0.592836 | 0.832736 | 0.820277 | Socs5      |
| GO_BP_m4GO:000229T cell differ2/727 | 65/23843  | 0.593592 | 0.832736 | 0.820277 | Il27/Socs5 |
| GO_BP_m4GO:000271regulation 2/727   | 65/23843  | 0.593592 | 0.832736 | 0.820277 | Ffar3/Mapl |
| GO_BP_m4GO:000651protein mo2/727    | 65/23843  | 0.593592 | 0.832736 | 0.820277 | Nedd4/Ne   |
| GO_BP_m4GO:003508axoneme a2/727     | 65/23843  | 0.593592 | 0.832736 | 0.820277 | Ccdc114/N  |
| GO_BP_m4GO:004477mitotic DN2/727    | 65/23843  | 0.593592 | 0.832736 | 0.820277 | Hus1/Pidd  |
| GO_BP_m4GO:005511regulation 2/727   | 65/23843  | 0.593592 | 0.832736 | 0.820277 | Dsp/Slc8a1 |
| GO_BP_m4GO:005116nuclear tra9/727   | 307/23843 | 0.594604 | 0.833297 | 0.82083  | Agap3/Anç  |
| GO_BP_m4GO:000614regulation 5/727   | 170/23843 | 0.594895 | 0.833297 | 0.82083  | Cap2/Gngi  |
| GO_BP_m4GO:000974response tr5/727   | 170/23843 | 0.594895 | 0.833297 | 0.82083  | Ager/C1qtr |

|                                      |           |          |          |          |             |
|--------------------------------------|-----------|----------|----------|----------|-------------|
| GO_BP_m4GO:00224C negative re5/727   | 170/23843 | 0.594895 | 0.833297 | 0.82083  | Btn2a2/Erb  |
| GO_BP_m4GO:00508E regulation 5/727   | 170/23843 | 0.594895 | 0.833297 | 0.82083  | Cacna1g/E   |
| GO_BP_m4GO:005071 positive reç8/727  | 273/23843 | 0.595038 | 0.833297 | 0.82083  | C1qtnf12/Il |
| GO_BP_m4GO:00486C reproductiv\13/727 | 443/23843 | 0.59539  | 0.833546 | 0.821075 | Brip1/Esr2/ |
| GO_BP_m4GO:000631 DNA recon7/727     | 239/23843 | 0.595932 | 0.83406  | 0.821582 | Cenps/Brip  |
| GO_BP_m4GO:003294 mononucle9/727     | 308/23843 | 0.598502 | 0.836006 | 0.823499 | Ager/Btn2a  |
| GO_BP_m4GO:00198E antigen prc3/727   | 101/23843 | 0.598546 | 0.836006 | 0.823499 | H2-M10.1/   |
| GO_BP_m4GO:00302E bone mine 3/727    | 101/23843 | 0.598546 | 0.836006 | 0.823499 | Duox2/Gat   |
| GO_BP_m4GO:003444 lipid oxidat3/727  | 101/23843 | 0.598546 | 0.836006 | 0.823499 | Decr1/Irs2/ |
| GO_BP_m4GO:00359E cellular res 3/727 | 101/23843 | 0.598546 | 0.836006 | 0.823499 | Atf6b/Ddit: |
| GO_BP_m4GO:004544 endothelial3/727   | 101/23843 | 0.598546 | 0.836006 | 0.823499 | Abcb1b/Cc   |
| GO_BP_m4GO:006041 heart grow3/727    | 101/23843 | 0.598546 | 0.836006 | 0.823499 | Mapk14/M    |
| GO_BP_m4GO:000914 nucleoside 8/727   | 274/23843 | 0.599164 | 0.83611  | 0.823602 | Ak3/Atp5c:  |
| GO_BP_m4GO:000647 protein me5/727    | 171/23843 | 0.600097 | 0.83611  | 0.823602 | Bhmt/Cam    |
| GO_BP_m4GO:00073E gastrulation5/727  | 171/23843 | 0.600097 | 0.83611  | 0.823602 | Nat8f1/Du:  |
| GO_BP_m4GO:000821 protein alk5/727   | 171/23843 | 0.600097 | 0.83611  | 0.823602 | Bhmt/Cam    |
| GO_BP_m4GO:00342E response tr5/727   | 171/23843 | 0.600097 | 0.83611  | 0.823602 | Ager/C1qt   |
| GO_BP_m4GO:00351E regulation 5/727   | 171/23843 | 0.600097 | 0.83611  | 0.823602 | Cacna1g/E   |
| GO_BP_m4GO:000037 RNA splicir7/727   | 240/23843 | 0.600332 | 0.83611  | 0.823602 | Gemin5/Lu   |
| GO_BP_m4GO:00003E mRNA splir7/727    | 240/23843 | 0.600332 | 0.83611  | 0.823602 | Gemin5/Lu   |
| GO_BP_m4GO:001991 lipid storag2/727  | 66/23843  | 0.601932 | 0.83611  | 0.823602 | Apoc4/Me:   |
| GO_BP_m4GO:00434C negative re2/727   | 66/23843  | 0.601932 | 0.83611  | 0.823602 | Dusp10/Sp   |
| GO_BP_m4GO:19030E positive reç2/727  | 66/23843  | 0.601932 | 0.83611  | 0.823602 | F12/Rtn4    |
| GO_BP_m4GO:00066E glycerophc6/727    | 206/23843 | 0.602234 | 0.83611  | 0.823602 | Apoa4/Gdç   |
| GO_BP_m4GO:00352E multicellulæ6/727  | 206/23843 | 0.602234 | 0.83611  | 0.823602 | Ccm2/Duo    |
| GO_BP_m4GO:00514C neuron apc8/727    | 275/23843 | 0.603269 | 0.83611  | 0.823602 | Ager/Akt1s  |
| GO_BP_m4GO:000912 purine nucl4/727   | 137/23843 | 0.604403 | 0.83611  | 0.823602 | Ak3/Atp5c:  |
| GO_BP_m4GO:00091E purine ribo4/727   | 137/23843 | 0.604403 | 0.83611  | 0.823602 | Ak3/Atp5c:  |
| GO_BP_m4GO:005067 positive reç4/727  | 137/23843 | 0.604403 | 0.83611  | 0.823602 | Ager/Il13/I |
| GO_BP_m4GO:005512 digestive sy4/727  | 137/23843 | 0.604403 | 0.83611  | 0.823602 | Gata1/Mir7  |
| GO_BP_m4GO:000037 RNA splicir7/727   | 241/23843 | 0.604707 | 0.83611  | 0.823602 | Gemin5/Lu   |
| GO_BP_m4GO:200102 regulation 3/727   | 102/23843 | 0.605235 | 0.83611  | 0.823602 | Htr2c/Ripk: |
| GO_BP_m4GO:003514 tube forma5/727    | 172/23843 | 0.60526  | 0.83611  | 0.823602 | Bcl10/Folr1 |
| GO_BP_m4GO:00015E cilium or fl:1/727 | 30/23843  | 0.605266 | 0.83611  | 0.823602 | Tekt5       |
| GO_BP_m4GO:000282 regulation 1/727   | 30/23843  | 0.605266 | 0.83611  | 0.823602 | Socs5       |
| GO_BP_m4GO:00070E centriole re1/727  | 30/23843  | 0.605266 | 0.83611  | 0.823602 | Cep152      |
| GO_BP_m4GO:000804 motor neu1/727     | 30/23843  | 0.605266 | 0.83611  | 0.823602 | Erbp2       |
| GO_BP_m4GO:00095E detection c1/727   | 30/23843  | 0.605266 | 0.83611  | 0.823602 | Gnat1       |
| GO_BP_m4GO:00325E protein tra1/727   | 30/23843  | 0.605266 | 0.83611  | 0.823602 | Snap47      |
| GO_BP_m4GO:00439E positive reç1/727  | 30/23843  | 0.605266 | 0.83611  | 0.823602 | Gpr61       |
| GO_BP_m4GO:00456E negative re1/727   | 30/23843  | 0.605266 | 0.83611  | 0.823602 | Ddit3       |
| GO_BP_m4GO:004592 negative re1/727   | 30/23843  | 0.605266 | 0.83611  | 0.823602 | Cbarp       |
| GO_BP_m4GO:00508C circadian sl1/727  | 30/23843  | 0.605266 | 0.83611  | 0.823602 | Hcrtr1      |
| GO_BP_m4GO:00602E cilium-dep 1/727   | 30/23843  | 0.605266 | 0.83611  | 0.823602 | Tekt5       |
| GO_BP_m4GO:006184 microtubul1/727    | 30/23843  | 0.605266 | 0.83611  | 0.823602 | Aurka       |
| GO_BP_m4GO:007067 response tr1/727   | 30/23843  | 0.605266 | 0.83611  | 0.823602 | Rps2        |
| GO_BP_m4GO:00715E protein loc1/727   | 30/23843  | 0.605266 | 0.83611  | 0.823602 | Aurka       |
| GO_BP_m4GO:19000E positive reç1/727  | 30/23843  | 0.605266 | 0.83611  | 0.823602 | Anp32b      |



|                   |              |        |           |          |          |          |             |
|-------------------|--------------|--------|-----------|----------|----------|----------|-------------|
| GO_BP_m4GO:190342 | negative re  | 1/727  | 30/23843  | 0.605266 | 0.83611  | 0.823602 | Wdr35       |
| GO_BP_m4GO:190343 | regulation   | 1/727  | 30/23843  | 0.605266 | 0.83611  | 0.823602 | Sec13       |
| GO_BP_m4GO:000150 | regulation   | 9/727  | 310/23843 | 0.606243 | 0.837218 | 0.824693 | Cacna1b/H   |
| GO_BP_m4GO:006145 | reproducti   | 13/727 | 447/23843 | 0.608357 | 0.838728 | 0.82618  | Brip1/Esr2/ |
| GO_BP_m4GO:000167 | cellular glu | 4/727  | 138/23843 | 0.610135 | 0.838728 | 0.82618  | Ager/C1qtr  |
| GO_BP_m4GO:000705 | cell cycle a | 4/727  | 138/23843 | 0.610135 | 0.838728 | 0.82618  | Ddit3/Ern2  |
| GO_BP_m4GO:000722 | smoothenε    | 4/727  | 138/23843 | 0.610135 | 0.838728 | 0.82618  | Ctnna1/Kct  |
| GO_BP_m4GO:000729 | female gan   | 4/727  | 138/23843 | 0.610135 | 0.838728 | 0.82618  | Aurka/Figl  |
| GO_BP_m4GO:001082 | positive re  | 4/727  | 138/23843 | 0.610135 | 0.838728 | 0.82618  | Plagl2/Torr |
| GO_BP_m4GO:003238 | negative re  | 2/727  | 67/23843  | 0.610142 | 0.838728 | 0.82618  | Gas6/Kcne   |
| GO_BP_m4GO:003410 | homotypic    | 2/727  | 67/23843  | 0.610142 | 0.838728 | 0.82618  | Dsp/Gata1   |
| GO_BP_m4GO:190589 | regulation   | 2/727  | 67/23843  | 0.610142 | 0.838728 | 0.82618  | Atf6b/Ppp1  |
| GO_BP_m4GO:001645 | gene silenc  | 8/727  | 277/23843 | 0.611416 | 0.838728 | 0.82618  | Cnot6/Dyd   |
| GO_BP_m4GO:003264 | regulation   | 3/727  | 103/23843 | 0.611849 | 0.838728 | 0.82618  | Gas6/Il27/I |
| GO_BP_m4GO:004347 | pigmentati   | 3/727  | 103/23843 | 0.611849 | 0.838728 | 0.82618  | Cdh3/Mre    |
| GO_BP_m4GO:004663 | alpha-beta   | 3/727  | 103/23843 | 0.611849 | 0.838728 | 0.82618  | Il27/Rpl22/ |
| GO_BP_m4GO:004814 | regulation   | 3/727  | 103/23843 | 0.611849 | 0.838728 | 0.82618  | Ager/Gas6   |
| GO_BP_m4GO:200011 | negative re  | 3/727  | 103/23843 | 0.611849 | 0.838728 | 0.82618  | Dpep1/Gas   |
| GO_BP_m4GO:004677 | protein aut  | 7/727  | 243/23843 | 0.613381 | 0.838728 | 0.82618  | Erbp2/Grb2  |
| GO_BP_m4GO:005086 | positive re  | 13/727 | 449/23843 | 0.614768 | 0.838728 | 0.82618  | Ager/Bcl10  |
| GO_BP_m4GO:000155 | regulation   | 12/727 | 415/23843 | 0.615081 | 0.838728 | 0.82618  | Anapc2/Erl  |
| GO_BP_m4GO:000176 | neuron mi    | 5/727  | 174/23843 | 0.615471 | 0.838728 | 0.82618  | Esr2/Fezf1/ |
| GO_BP_m4GO:003294 | positive re  | 4/727  | 139/23843 | 0.615815 | 0.838728 | 0.82618  | Ager/Il13/I |
| GO_BP_m4GO:001063 | regulation   | 6/727  | 209/23843 | 0.616259 | 0.838728 | 0.82618  | Ager/Dusp   |
| GO_BP_m4GO:001025 | endomem      | 10/727 | 347/23843 | 0.616477 | 0.838728 | 0.82618  | A4galt/Blzf |
| GO_BP_m4GO:000177 | natural kill | 1/727  | 31/23843  | 0.617317 | 0.838728 | 0.82618  | Gas6        |
| GO_BP_m4GO:000202 | regulation   | 1/727  | 31/23843  | 0.617317 | 0.838728 | 0.82618  | Slc8a1      |
| GO_BP_m4GO:000647 | protein AD   | 1/727  | 31/23843  | 0.617317 | 0.838728 | 0.82618  | Art4        |
| GO_BP_m4GO:000702 | negative re  | 1/727  | 31/23843  | 0.617317 | 0.838728 | 0.82618  | Nav3        |
| GO_BP_m4GO:000829 | isoprenoid   | 1/727  | 31/23843  | 0.617317 | 0.838728 | 0.82618  | Pmvk        |
| GO_BP_m4GO:001056 | regulation   | 1/727  | 31/23843  | 0.617317 | 0.838728 | 0.82618  | Recql5      |
| GO_BP_m4GO:001057 | regulation   | 1/727  | 31/23843  | 0.617317 | 0.838728 | 0.82618  | C3ar1       |
| GO_BP_m4GO:001066 | positive re  | 1/727  | 31/23843  | 0.617317 | 0.838728 | 0.82618  | Fndc1       |
| GO_BP_m4GO:001598 | energy cou   | 1/727  | 31/23843  | 0.617317 | 0.838728 | 0.82618  | Atp6v1e2    |
| GO_BP_m4GO:001827 | protein N-   | 1/727  | 31/23843  | 0.617317 | 0.838728 | 0.82618  | Stt3b       |
| GO_BP_m4GO:003239 | DNA geom     | 1/727  | 31/23843  | 0.617317 | 0.838728 | 0.82618  | Recql5      |
| GO_BP_m4GO:003246 | positive re  | 1/727  | 31/23843  | 0.617317 | 0.838728 | 0.82618  | Sstr5       |
| GO_BP_m4GO:003268 | negative re  | 1/727  | 31/23843  | 0.617317 | 0.838728 | 0.82618  | Gas6        |
| GO_BP_m4GO:003274 | positive re  | 1/727  | 31/23843  | 0.617317 | 0.838728 | 0.82618  | Rps3        |
| GO_BP_m4GO:003308 | regulation   | 1/727  | 31/23843  | 0.617317 | 0.838728 | 0.82618  | Erbp2       |
| GO_BP_m4GO:004274 | regulation   | 1/727  | 31/23843  | 0.617317 | 0.838728 | 0.82618  | Hcctr1      |
| GO_BP_m4GO:004327 | anoikis      | 1/727  | 31/23843  | 0.617317 | 0.838728 | 0.82618  | Sik1        |
| GO_BP_m4GO:004351 | regulation   | 1/727  | 31/23843  | 0.617317 | 0.838728 | 0.82618  | Smyd2       |
| GO_BP_m4GO:004362 | ncRNA 3'-    | 1/727  | 31/23843  | 0.617317 | 0.838728 | 0.82618  | Eri2        |
| GO_BP_m4GO:004824 | sperm cap    | 1/727  | 31/23843  | 0.617317 | 0.838728 | 0.82618  | Catsper2    |
| GO_BP_m4GO:004853 | lymph nod    | 1/727  | 31/23843  | 0.617317 | 0.838728 | 0.82618  | Polb        |
| GO_BP_m4GO:005149 | positive re  | 1/727  | 31/23843  | 0.617317 | 0.838728 | 0.82618  | Neurl1a     |
| GO_BP_m4GO:007088 | regulation   | 1/727  | 31/23843  | 0.617317 | 0.838728 | 0.82618  | Mir1a-2     |

|                                     |           |          |          |          |             |
|-------------------------------------|-----------|----------|----------|----------|-------------|
| GO_BP_m4GO:00725εclathrin-de1/727   | 31/23843  | 0.617317 | 0.838728 | 0.82618  | Gak         |
| GO_BP_m4GO:009007relaxation c1/727  | 31/23843  | 0.617317 | 0.838728 | 0.82618  | Slc8a1      |
| GO_BP_m4GO:00901εestablishmε1/727   | 31/23843  | 0.617317 | 0.838728 | 0.82618  | Frmd4b      |
| GO_BP_m4GO:009021positive reε1/727  | 31/23843  | 0.617317 | 0.838728 | 0.82618  | Tnfaip8l3   |
| GO_BP_m4GO:00985εcentriole aε1/727  | 31/23843  | 0.617317 | 0.838728 | 0.82618  | Cep152      |
| GO_BP_m4GO:01060εregulation 1/727   | 31/23843  | 0.617317 | 0.838728 | 0.82618  | Mir1a-2     |
| GO_BP_m4GO:19018εpositive reε1/727  | 31/23843  | 0.617317 | 0.838728 | 0.82618  | Nphp1       |
| GO_BP_m4GO:19055εprotein loc 1/727  | 31/23843  | 0.617317 | 0.838728 | 0.82618  | Aurka       |
| GO_BP_m4GO:003214activation c7/727  | 244/23843 | 0.617679 | 0.838728 | 0.82618  | Cspg4/Ernε  |
| GO_BP_m4GO:00017Cin utero en13/727  | 450/23843 | 0.617955 | 0.838728 | 0.82618  | Btf3/Ccm2,  |
| GO_BP_m4GO:00066εfatty acid b2/727  | 68/23843  | 0.618223 | 0.838728 | 0.82618  | Decr1/Irs2  |
| GO_BP_m4GO:00308εregulation 2/727   | 68/23843  | 0.618223 | 0.838728 | 0.82618  | Il13/Irs2   |
| GO_BP_m4GO:00423Cregulation 2/727   | 68/23843  | 0.618223 | 0.838728 | 0.82618  | Gas6/Mapk   |
| GO_BP_m4GO:00425Cregulation 2/727   | 68/23843  | 0.618223 | 0.838728 | 0.82618  | Il13/Lck    |
| GO_BP_m4GO:00432εleukocyte c2/727   | 68/23843  | 0.618223 | 0.838728 | 0.82618  | Il13/Vampε  |
| GO_BP_m4GO:00483εmesoderm 2/727     | 68/23843  | 0.618223 | 0.838728 | 0.82618  | Inhba/Sox1  |
| GO_BP_m4GO:19044εpositive reε2/727  | 68/23843  | 0.618223 | 0.838728 | 0.82618  | Il13/Kcne1  |
| GO_BP_m4GO:19034Creactive ox3/727   | 104/23843 | 0.618389 | 0.838728 | 0.82618  | Cyp1a2/Mε   |
| GO_BP_m4GO:00714εcellular resε8/727 | 279/23843 | 0.619475 | 0.839963 | 0.827397 | 5330417Cε   |
| GO_BP_m4GO:00160εorganic aci6/727   | 210/23843 | 0.620872 | 0.840485 | 0.82791  | Akr1d1/Cyε  |
| GO_BP_m4GO:00463εcarboxylic ε6/727  | 210/23843 | 0.620872 | 0.840485 | 0.82791  | Akr1d1/Cyε  |
| GO_BP_m4GO:004501glycerolipic4/727  | 140/23843 | 0.621443 | 0.840485 | 0.82791  | Htr2c/Pigp  |
| GO_BP_m4GO:00466εalpha-beta4/727    | 140/23843 | 0.621443 | 0.840485 | 0.82791  | Ager/Il27/F |
| GO_BP_m4GO:00507εnegative re4/727   | 140/23843 | 0.621443 | 0.840485 | 0.82791  | Ager/Dusp   |
| GO_BP_m4GO:00485εembryonic 14/727   | 486/23843 | 0.623837 | 0.840485 | 0.82791  | Efna1/Folr1 |
| GO_BP_m4GO:00007εdouble-strε3/727   | 105/23843 | 0.624853 | 0.840485 | 0.82791  | Hus1/Recq   |
| GO_BP_m4GO:00007εrecombinaε3/727    | 105/23843 | 0.624853 | 0.840485 | 0.82791  | Hus1/Recq   |
| GO_BP_m4GO:00105Cpositive reε3/727  | 105/23843 | 0.624853 | 0.840485 | 0.82791  | 5330417Cε   |
| GO_BP_m4GO:00158εamine tran 3/727   | 105/23843 | 0.624853 | 0.840485 | 0.82791  | Aqp9/Htrε   |
| GO_BP_m4GO:00192εresponse trε3/727  | 105/23843 | 0.624853 | 0.840485 | 0.82791  | Tmem145/    |
| GO_BP_m4GO:003031osteoclast ε3/727  | 105/23843 | 0.624853 | 0.840485 | 0.82791  | Car2/Mapk   |
| GO_BP_m4GO:004814fibroblast ε3/727  | 105/23843 | 0.624853 | 0.840485 | 0.82791  | Ager/Gas6,  |
| GO_BP_m4GO:200017regulation 3/727   | 105/23843 | 0.624853 | 0.840485 | 0.82791  | Ctnna1/Ga   |
| GO_BP_m4GO:00485εembryonic 9/727    | 315/23843 | 0.625267 | 0.840485 | 0.82791  | Efna1/Folr1 |
| GO_BP_m4GO:19033εregulation 6/727   | 211/23843 | 0.625453 | 0.840485 | 0.82791  | Bcl10/Rela, |
| GO_BP_m4GO:00022εresponse trε11/727 | 384/23843 | 0.625927 | 0.840485 | 0.82791  | AY761184/   |
| GO_BP_m4GO:000027polysaccha2/727    | 69/23843  | 0.626174 | 0.840485 | 0.82791  | B3gnt5/Irsε |
| GO_BP_m4GO:00421εnegative re2/727   | 69/23843  | 0.626174 | 0.840485 | 0.82791  | Btn2a2/Erb  |
| GO_BP_m4GO:004864animal org 2/727   | 69/23843  | 0.626174 | 0.840485 | 0.82791  | Folr1/Pim1  |
| GO_BP_m4GO:006117regulation 2/727   | 69/23843  | 0.626174 | 0.840485 | 0.82791  | C1qtnf12/T  |
| GO_BP_m4GO:00032Ccardiac che4/727   | 141/23843 | 0.627019 | 0.840485 | 0.82791  | Dsp/Fhl2/N  |
| GO_BP_m4GO:00091εribonucleoε4/727   | 141/23843 | 0.627019 | 0.840485 | 0.82791  | Ak3/Atp5c:  |
| GO_BP_m4GO:00512εnegative re4/727   | 141/23843 | 0.627019 | 0.840485 | 0.82791  | Btn2a2/Erb  |
| GO_BP_m4GO:00001εrRNA modi1/727     | 32/23843  | 0.629001 | 0.840485 | 0.82791  | Mrm2        |
| GO_BP_m4GO:000041protein peε1/727   | 32/23843  | 0.629001 | 0.840485 | 0.82791  | Ppid        |
| GO_BP_m4GO:000244neutrophil 1/727   | 32/23843  | 0.629001 | 0.840485 | 0.82791  | Dnase1      |
| GO_BP_m4GO:00063εregulation 1/727   | 32/23843  | 0.629001 | 0.840485 | 0.82791  | Erbp2       |
| GO_BP_m4GO:000677fat-soluble 1/727  | 32/23843  | 0.629001 | 0.840485 | 0.82791  | Vdr         |

|                                |        |           |          |          |          |             |
|--------------------------------|--------|-----------|----------|----------|----------|-------------|
| GO_BP_m4GO:000703peroxisome    | 1/727  | 32/23843  | 0.629001 | 0.840485 | 0.82791  | Pex1        |
| GO_BP_m4GO:001004response to   | 1/727  | 32/23843  | 0.629001 | 0.840485 | 0.82791  | Mt1         |
| GO_BP_m4GO:001700cytochrome    | 1/727  | 32/23843  | 0.629001 | 0.840485 | 0.82791  | Coa5        |
| GO_BP_m4GO:001819peptidyl-ase  | 1/727  | 32/23843  | 0.629001 | 0.840485 | 0.82791  | Stt3b       |
| GO_BP_m4GO:001937epoxygena     | 1/727  | 32/23843  | 0.629001 | 0.840485 | 0.82791  | Cyp2a22     |
| GO_BP_m4GO:002241circadian sl  | 1/727  | 32/23843  | 0.629001 | 0.840485 | 0.82791  | Hcctr1      |
| GO_BP_m4GO:003359mammary       | 1/727  | 32/23843  | 0.629001 | 0.840485 | 0.82791  | Rtn4        |
| GO_BP_m4GO:003623granulocyte   | 1/727  | 32/23843  | 0.629001 | 0.840485 | 0.82791  | Dnase1      |
| GO_BP_m4GO:004003regulation    | 1/727  | 32/23843  | 0.629001 | 0.840485 | 0.82791  | Spry2       |
| GO_BP_m4GO:004427cellular cari | 1/727  | 32/23843  | 0.629001 | 0.840485 | 0.82791  | Manba       |
| GO_BP_m4GO:004481mitotic G2/   | 1/727  | 32/23843  | 0.629001 | 0.840485 | 0.82791  | Hus1        |
| GO_BP_m4GO:004557regulation    | 1/727  | 32/23843  | 0.629001 | 0.840485 | 0.82791  | Zfp36l1     |
| GO_BP_m4GO:004574positive re   | 1/727  | 32/23843  | 0.629001 | 0.840485 | 0.82791  | Tmod2       |
| GO_BP_m4GO:004632negative re   | 1/727  | 32/23843  | 0.629001 | 0.840485 | 0.82791  | Dusp10      |
| GO_BP_m4GO:005118cofactor tr   | 1/727  | 32/23843  | 0.629001 | 0.840485 | 0.82791  | Folr1       |
| GO_BP_m4GO:006014regulation    | 1/727  | 32/23843  | 0.629001 | 0.840485 | 0.82791  | Mapk14      |
| GO_BP_m4GO:006029long term     | 1/727  | 32/23843  | 0.629001 | 0.840485 | 0.82791  | Ager        |
| GO_BP_m4GO:006079cell fate co  | 1/727  | 32/23843  | 0.629001 | 0.840485 | 0.82791  | Sox17       |
| GO_BP_m4GO:007089DNA-temp      | 1/727  | 32/23843  | 0.629001 | 0.840485 | 0.82791  | Polr1e      |
| GO_BP_m4GO:008015regulation    | 1/727  | 32/23843  | 0.629001 | 0.840485 | 0.82791  | Astl        |
| GO_BP_m4GO:190211negative re   | 1/727  | 32/23843  | 0.629001 | 0.840485 | 0.82791  | Sec22b      |
| GO_BP_m4GO:190218regulation    | 1/727  | 32/23843  | 0.629001 | 0.840485 | 0.82791  | Zfp72       |
| GO_BP_m4GO:200003regulation    | 1/727  | 32/23843  | 0.629001 | 0.840485 | 0.82791  | Zfp706      |
| GO_BP_m4GO:000701actin filame  | 11/727 | 385/23843 | 0.629328 | 0.840687 | 0.82811  | Arhgap18/   |
| GO_BP_m4GO:000916purine ribo   | 7/727  | 247/23843 | 0.630417 | 0.841437 | 0.828848 | Ak3/Atp5c:  |
| GO_BP_m4GO:000920purine ribo   | 7/727  | 247/23843 | 0.630417 | 0.841437 | 0.828848 | Ak3/Atp5c:  |
| GO_BP_m4GO:004566negative re   | 7/727  | 247/23843 | 0.630417 | 0.841437 | 0.828848 | Cspg4/Dgu   |
| GO_BP_m4GO:003200regulation    | 3/727  | 106/23843 | 0.631242 | 0.841832 | 0.829238 | Akt1s1/Gas  |
| GO_BP_m4GO:004647glycerophc    | 3/727  | 106/23843 | 0.631242 | 0.841832 | 0.829238 | Htr2c/Pigp  |
| GO_BP_m4GO:199026neutrophil    | 3/727  | 106/23843 | 0.631242 | 0.841832 | 0.829238 | C3ar1/Lgal  |
| GO_BP_m4GO:000914nucleoside    | 4/727  | 142/23843 | 0.632543 | 0.843332 | 0.830715 | Ak3/Atp5c:  |
| GO_BP_m4GO:000173morphoge      | 2/727  | 70/23843  | 0.633996 | 0.843622 | 0.831001 | Astn2/Ror2  |
| GO_BP_m4GO:000742peripheral    | 2/727  | 70/23843  | 0.633996 | 0.843622 | 0.831001 | Erbp2/Rela  |
| GO_BP_m4GO:002153diencephal    | 2/727  | 70/23843  | 0.633996 | 0.843622 | 0.831001 | Duox2/Zek   |
| GO_BP_m4GO:003241lysosome      | 2/727  | 70/23843  | 0.633996 | 0.843622 | 0.831001 | Il13/Vamp8  |
| GO_BP_m4GO:004211macrophag     | 2/727  | 70/23843  | 0.633996 | 0.843622 | 0.831001 | Ager/Il13   |
| GO_BP_m4GO:005090sensory pe    | 2/727  | 70/23843  | 0.633996 | 0.843622 | 0.831001 | Gnat1/Tas2  |
| GO_BP_m4GO:200024positive re   | 2/727  | 70/23843  | 0.633996 | 0.843622 | 0.831001 | Aurka/Inhbc |
| GO_BP_m4GO:004217regulation    | 10/727 | 352/23843 | 0.634328 | 0.843735 | 0.831112 | Aurka/Efna  |
| GO_BP_m4GO:004354positive re   | 6/727  | 213/23843 | 0.63452  | 0.843735 | 0.831112 | Arhgap23/   |
| GO_BP_m4GO:000912purine nuc    | 7/727  | 248/23843 | 0.63461  | 0.843735 | 0.831112 | Ak3/Atp5c:  |
| GO_BP_m4GO:003009myeloid ce    | 11/727 | 387/23843 | 0.636083 | 0.844225 | 0.831595 | Car2/Gata1  |
| GO_BP_m4GO:004324regulation    | 3/727  | 107/23843 | 0.637555 | 0.844225 | 0.831595 | Nav3/Spta   |
| GO_BP_m4GO:004662regulation    | 3/727  | 107/23843 | 0.637555 | 0.844225 | 0.831595 | Mapk14/M    |
| GO_BP_m4GO:003032embryonic     | 4/727  | 143/23843 | 0.638014 | 0.844225 | 0.831595 | Fgf4/Ror2/  |
| GO_BP_m4GO:003085regulation    | 4/727  | 143/23843 | 0.638014 | 0.844225 | 0.831595 | Ovol2/Vdr   |
| GO_BP_m4GO:003511embryonic     | 4/727  | 143/23843 | 0.638014 | 0.844225 | 0.831595 | Fgf4/Ror2/  |
| GO_BP_m4GO:003164regulation    | 7/727  | 249/23843 | 0.638775 | 0.844225 | 0.831595 | Aurka/Efna  |

|                                     |           |          |          |          |             |
|-------------------------------------|-----------|----------|----------|----------|-------------|
| GO_BP_m4GO:000741axon guida6/727    | 214/23843 | 0.639004 | 0.844225 | 0.831595 | Efna1/ErbB  |
| GO_BP_m4GO:005125positive reç11/727 | 388/23843 | 0.639436 | 0.844225 | 0.831595 | Ager/Bcl10  |
| GO_BP_m4GO:001633morphoge15/727     | 179/23843 | 0.640308 | 0.844225 | 0.831595 | Bcl10/Folr1 |
| GO_BP_m4GO:000000mitochond1/727     | 33/23843  | 0.640328 | 0.844225 | 0.831595 | Pid1        |
| GO_BP_m4GO:000275cytoplasmic1/727   | 33/23843  | 0.640328 | 0.844225 | 0.831595 | Rela        |
| GO_BP_m4GO:000627DNA replic1/727    | 33/23843  | 0.640328 | 0.844225 | 0.831595 | Gmnc        |
| GO_BP_m4GO:000638transcriptic1/727  | 33/23843  | 0.640328 | 0.844225 | 0.831595 | ErbB2       |
| GO_BP_m4GO:001057vascular en1/727   | 33/23843  | 0.640328 | 0.844225 | 0.831595 | C3ar1       |
| GO_BP_m4GO:001834protein pal1/727   | 33/23843  | 0.640328 | 0.844225 | 0.831595 | Zdhhc22     |
| GO_BP_m4GO:001943triglyceride1/727  | 33/23843  | 0.640328 | 0.844225 | 0.831595 | Sik1        |
| GO_BP_m4GO:003438plasma lipc1/727   | 33/23843  | 0.640328 | 0.844225 | 0.831595 | Lipc        |
| GO_BP_m4GO:004340skeletal mu1/727   | 33/23843  | 0.640328 | 0.844225 | 0.831595 | Mapk14      |
| GO_BP_m4GO:004587negative re1/727   | 33/23843  | 0.640328 | 0.844225 | 0.831595 | Kctd6       |
| GO_BP_m4GO:004594positive reç1/727  | 33/23843  | 0.640328 | 0.844225 | 0.831595 | Apoa4       |
| GO_BP_m4GO:004804embryonic1/727     | 33/23843  | 0.640328 | 0.844225 | 0.831595 | Vax2        |
| GO_BP_m4GO:004856embryonic1/727     | 33/23843  | 0.640328 | 0.844225 | 0.831595 | Ovol2       |
| GO_BP_m4GO:006033type I inter1/727  | 33/23843  | 0.640328 | 0.844225 | 0.831595 | Oas2        |
| GO_BP_m4GO:006074prostate gl1/727   | 33/23843  | 0.640328 | 0.844225 | 0.831595 | Esr2        |
| GO_BP_m4GO:007135cellular resç1/727 | 33/23843  | 0.640328 | 0.844225 | 0.831595 | Oas2        |
| GO_BP_m4GO:190102positive reç1/727  | 33/23843  | 0.640328 | 0.844225 | 0.831595 | Kcne1       |
| GO_BP_m4GO:190166quinone m1/727     | 33/23843  | 0.640328 | 0.844225 | 0.831595 | Coq6        |
| GO_BP_m4GO:190320regulation1/727    | 33/23843  | 0.640328 | 0.844225 | 0.831595 | Ripk1       |
| GO_BP_m4GO:190358positive reç1/727  | 33/23843  | 0.640328 | 0.844225 | 0.831595 | Pid1        |
| GO_BP_m4GO:000726tyrosine ph2/727   | 71/23843  | 0.641689 | 0.844225 | 0.831595 | Il13/Lck    |
| GO_BP_m4GO:003227negative re2/727   | 71/23843  | 0.641689 | 0.844225 | 0.831595 | Sptan1/Tm   |
| GO_BP_m4GO:003254mitochond2/727     | 71/23843  | 0.641689 | 0.844225 | 0.831595 | Ears2/Mrps  |
| GO_BP_m4GO:003289regulation2/727    | 71/23843  | 0.641689 | 0.844225 | 0.831595 | Htr2c/Irs2  |
| GO_BP_m4GO:003463cellular car2/727  | 71/23843  | 0.641689 | 0.844225 | 0.831595 | B3gnt5/Irs2 |
| GO_BP_m4GO:004273embryonic2/727     | 71/23843  | 0.641689 | 0.844225 | 0.831595 | Ror2/Tmer   |
| GO_BP_m4GO:004336CD4-positi2/727    | 71/23843  | 0.641689 | 0.844225 | 0.831595 | Il27/Socs5  |
| GO_BP_m4GO:190336negative re2/727   | 71/23843  | 0.641689 | 0.844225 | 0.831595 | Efna1/Pdcl  |
| GO_BP_m4GO:004352regulation7/727    | 250/23843 | 0.642913 | 0.844795 | 0.832157 | Ager/Akt1s  |
| GO_BP_m4GO:011005regulation7/727    | 250/23843 | 0.642913 | 0.844795 | 0.832157 | Arhgap18/   |
| GO_BP_m4GO:004583positive reç4/727  | 144/23843 | 0.643431 | 0.844795 | 0.832157 | Apoa4/Htr   |
| GO_BP_m4GO:000184neural tubeç3/727  | 108/23843 | 0.643792 | 0.844795 | 0.832157 | Bcl10/Folr1 |
| GO_BP_m4GO:000597polysaccha3/727    | 108/23843 | 0.643792 | 0.844795 | 0.832157 | B3gnt5/Irs2 |
| GO_BP_m4GO:001092cellular cor3/727  | 108/23843 | 0.643792 | 0.844795 | 0.832157 | Myom2/Ne    |
| GO_BP_m4GO:003236regulation3/727    | 108/23843 | 0.643792 | 0.844795 | 0.832157 | Abcb4/Apc   |
| GO_BP_m4GO:003524synaptic trç3/727  | 108/23843 | 0.643792 | 0.844795 | 0.832157 | Grm1/Ror2   |
| GO_BP_m4GO:007134cellular resç3/727 | 108/23843 | 0.643792 | 0.844795 | 0.832157 | Kif16b/Rab  |
| GO_BP_m4GO:001470striated mu12/727  | 424/23843 | 0.644357 | 0.844795 | 0.832157 | Cops2/Dsp   |
| GO_BP_m4GO:000916ribonucleo:7/727   | 251/23843 | 0.647024 | 0.844795 | 0.832157 | Ak3/Atp5c:  |
| GO_BP_m4GO:000919ribonucleo:7/727   | 251/23843 | 0.647024 | 0.844795 | 0.832157 | Ak3/Atp5c:  |
| GO_BP_m4GO:001046negative re7/727   | 251/23843 | 0.647024 | 0.844795 | 0.832157 | Dpep1/Gas   |
| GO_BP_m4GO:007066leukocyte ç9/727   | 321/23843 | 0.64744  | 0.844795 | 0.832157 | Ager/Btn2a  |
| GO_BP_m4GO:009748neuron prc6/727    | 216/23843 | 0.647874 | 0.844795 | 0.832157 | Efna1/ErbB  |
| GO_BP_m4GO:007066positive reç4/727  | 145/23843 | 0.648795 | 0.844795 | 0.832157 | Ager/Il13/I |
| GO_BP_m4GO:004873gland deve13/727   | 460/23843 | 0.649107 | 0.844795 | 0.832157 | Aurka/Duo   |

|                                     |           |          |          |          |             |
|-------------------------------------|-----------|----------|----------|----------|-------------|
| GO_BP_m4GO:00305Cregulation 2/727   | 72/23843  | 0.649254 | 0.844795 | 0.832157 | Gata1/Slc8  |
| GO_BP_m4GO:004244hormone b2/727     | 72/23843  | 0.649254 | 0.844795 | 0.832157 | Ffar3/Vdr   |
| GO_BP_m4GO:00550Ccardiac mu2/727    | 72/23843  | 0.649254 | 0.844795 | 0.832157 | Dsp/Myom    |
| GO_BP_m4GO:006107chaperone 2/727    | 72/23843  | 0.649254 | 0.844795 | 0.832157 | Dnajb14/Pj  |
| GO_BP_m4GO:190211positive reç2/727  | 72/23843  | 0.649254 | 0.844795 | 0.832157 | 5330417C2   |
| GO_BP_m4GO:00606Ctube closur3/727   | 109/23843 | 0.649954 | 0.844795 | 0.832157 | Bcl10/Folr1 |
| GO_BP_m4GO:00303Cnegative re5/727   | 181/23843 | 0.64996  | 0.844795 | 0.832157 | Inhba/Rtn4  |
| GO_BP_m4GO:004877tissue remc5/727   | 181/23843 | 0.64996  | 0.844795 | 0.832157 | Ager/Car2/  |
| GO_BP_m4GO:00019Enegative re1/727   | 34/23843  | 0.65131  | 0.844795 | 0.832157 | Muc4        |
| GO_BP_m4GO:00061Cpurine nucl1/727   | 34/23843  | 0.65131  | 0.844795 | 0.832157 | Nudt7       |
| GO_BP_m4GO:00082CC21-steroid1/727   | 34/23843  | 0.65131  | 0.844795 | 0.832157 | Akr1d1      |
| GO_BP_m4GO:00140Coligodendr1/727    | 34/23843  | 0.65131  | 0.844795 | 0.832157 | Nkx6-2      |
| GO_BP_m4GO:001404dopamine 1/727     | 34/23843  | 0.65131  | 0.844795 | 0.832157 | Rtn4        |
| GO_BP_m4GO:00140Eregulation 1/727   | 34/23843  | 0.65131  | 0.844795 | 0.832157 | Rtn4        |
| GO_BP_m4GO:001907viral releasç1/727 | 34/23843  | 0.65131  | 0.844795 | 0.832157 | Zfp72       |
| GO_BP_m4GO:002184cell prolifer1/727 | 34/23843  | 0.65131  | 0.844795 | 0.832157 | Zeb2        |
| GO_BP_m4GO:003111regulation 1/727   | 34/23843  | 0.65131  | 0.844795 | 0.832157 | Nav3        |
| GO_BP_m4GO:003164positive reç1/727  | 34/23843  | 0.65131  | 0.844795 | 0.832157 | Hcrt        |
| GO_BP_m4GO:003314negative re1/727   | 34/23843  | 0.65131  | 0.844795 | 0.832157 | Esr2        |
| GO_BP_m4GO:00332Cregulation 1/727   | 34/23843  | 0.65131  | 0.844795 | 0.832157 | Htr2c       |
| GO_BP_m4GO:003511embryonic 1/727    | 34/23843  | 0.65131  | 0.844795 | 0.832157 | Fgf4        |
| GO_BP_m4GO:00358Cexit from h1/727   | 34/23843  | 0.65131  | 0.844795 | 0.832157 | Zfp72       |
| GO_BP_m4GO:00358Cexit from h1/727   | 34/23843  | 0.65131  | 0.844795 | 0.832157 | Zfp72       |
| GO_BP_m4GO:004274circadian sl1/727  | 34/23843  | 0.65131  | 0.844795 | 0.832157 | Hcrr1       |
| GO_BP_m4GO:00450CDNA-depe1/727      | 34/23843  | 0.65131  | 0.844795 | 0.832157 | Cenps       |
| GO_BP_m4GO:00463Cregulation 1/727   | 34/23843  | 0.65131  | 0.844795 | 0.832157 | Irs2        |
| GO_BP_m4GO:00521Cmovement 1/727     | 34/23843  | 0.65131  | 0.844795 | 0.832157 | Zfp72       |
| GO_BP_m4GO:00521Cmovement 1/727     | 34/23843  | 0.65131  | 0.844795 | 0.832157 | Zfp72       |
| GO_BP_m4GO:006051prostate gl1/727   | 34/23843  | 0.65131  | 0.844795 | 0.832157 | Esr2        |
| GO_BP_m4GO:00702Eaxonemal c1/727    | 34/23843  | 0.65131  | 0.844795 | 0.832157 | Ccdc114     |
| GO_BP_m4GO:007087regulation 1/727   | 34/23843  | 0.65131  | 0.844795 | 0.832157 | Irs2        |
| GO_BP_m4GO:19037Cnegative re1/727   | 34/23843  | 0.65131  | 0.844795 | 0.832157 | Irs2        |
| GO_BP_m4GO:19900Eresponse tr1/727   | 34/23843  | 0.65131  | 0.844795 | 0.832157 | Rps3        |
| GO_BP_m4GO:19900Ccellular resç1/727 | 34/23843  | 0.65131  | 0.844795 | 0.832157 | Rps3        |
| GO_BP_m4GO:200077regulation 1/727   | 34/23843  | 0.65131  | 0.844795 | 0.832157 | Rbl1        |
| GO_BP_m4GO:000941response tr6/727   | 217/23843 | 0.65226  | 0.845797 | 0.833143 | Abcb4/Cypç  |
| GO_BP_m4GO:00301EB cell differ4/727 | 146/23843 | 0.654105 | 0.84773  | 0.835047 | Ifna12/Nfar |
| GO_BP_m4GO:19037Cnegative re4/727   | 146/23843 | 0.654105 | 0.84773  | 0.835047 | Erbp2/Socs  |
| GO_BP_m4GO:00905C RNA phosç2/727    | 73/23843  | 0.656692 | 0.850621 | 0.837896 | Eri2/Rnaseç |
| GO_BP_m4GO:19045Eregulation 2/727   | 73/23843  | 0.656692 | 0.850621 | 0.837896 | Gas6/Mapk   |
| GO_BP_m4GO:00028Cregulation 4/727   | 147/23843 | 0.659361 | 0.850644 | 0.837918 | Ager/Il27/M |
| GO_BP_m4GO:00091Cnucleoside 4/727   | 147/23843 | 0.659361 | 0.850644 | 0.837918 | Ak3/Atp5cç  |
| GO_BP_m4GO:20010Cregulation 5/727   | 183/23843 | 0.659446 | 0.850644 | 0.837918 | Recq15/Rpsç |
| GO_BP_m4GO:003497response tr6/727   | 219/23843 | 0.660929 | 0.850644 | 0.837918 | Atf6b/Dditç |
| GO_BP_m4GO:00181Cpeptidyl-seç9/727  | 325/23843 | 0.661807 | 0.850644 | 0.837918 | Camk1g/Ciç  |
| GO_BP_m4GO:00182Cpeptidyl-seç10/727 | 360/23843 | 0.661947 | 0.850644 | 0.837918 | Camk1g/Ciç  |
| GO_BP_m4GO:00015Cneurotrans 1/727   | 35/23843  | 0.661957 | 0.850644 | 0.837918 | Slc1a6      |
| GO_BP_m4GO:000714female mei1/727    | 35/23843  | 0.661957 | 0.850644 | 0.837918 | Aurka       |

|                                      |           |          |          |          |             |
|--------------------------------------|-----------|----------|----------|----------|-------------|
| GO_BP_m4GO:000995proximal/d 1/727    | 35/23843  | 0.661957 | 0.850644 | 0.837918 | Sp8         |
| GO_BP_m4GO:001403Schwann cr 1/727    | 35/23843  | 0.661957 | 0.850644 | 0.837918 | Rela        |
| GO_BP_m4GO:003106hair follicle 1/727 | 35/23843  | 0.661957 | 0.850644 | 0.837918 | Fst         |
| GO_BP_m4GO:003142keratinizati 1/727  | 35/23843  | 0.661957 | 0.850644 | 0.837918 | Cdh3        |
| GO_BP_m4GO:003222regulation 1/727    | 35/23843  | 0.661957 | 0.850644 | 0.837918 | Car2        |
| GO_BP_m4GO:003577positive reç 1/727  | 35/23843  | 0.661957 | 0.850644 | 0.837918 | C1qtnf12    |
| GO_BP_m4GO:003647cell death i 1/727  | 35/23843  | 0.661957 | 0.850644 | 0.837918 | Ripk1       |
| GO_BP_m4GO:004230regulation 1/727    | 35/23843  | 0.661957 | 0.850644 | 0.837918 | Apoa4       |
| GO_BP_m4GO:004255pteridine-c 1/727   | 35/23843  | 0.661957 | 0.850644 | 0.837918 | Folr1       |
| GO_BP_m4GO:004662negative re 1/727   | 35/23843  | 0.661957 | 0.850644 | 0.837918 | Mir1a-2     |
| GO_BP_m4GO:004663negative re 1/727   | 35/23843  | 0.661957 | 0.850644 | 0.837918 | Socs5       |
| GO_BP_m4GO:004800insulin-like 1/727  | 35/23843  | 0.661957 | 0.850644 | 0.837918 | Cdh3        |
| GO_BP_m4GO:005145intracellula 1/727  | 35/23843  | 0.661957 | 0.850644 | 0.837918 | Car2        |
| GO_BP_m4GO:005196positive reç 1/727  | 35/23843  | 0.661957 | 0.850644 | 0.837918 | Ror2        |
| GO_BP_m4GO:005502negative re 1/727   | 35/23843  | 0.661957 | 0.850644 | 0.837918 | Mir1a-2     |
| GO_BP_m4GO:006007Wnt signali 1/727   | 35/23843  | 0.661957 | 0.850644 | 0.837918 | Ror2        |
| GO_BP_m4GO:006044epithelial tü 1/727 | 35/23843  | 0.661957 | 0.850644 | 0.837918 | Spry2       |
| GO_BP_m4GO:009730programmı 1/727     | 35/23843  | 0.661957 | 0.850644 | 0.837918 | Ripk1       |
| GO_BP_m4GO:200017negative re 1/727   | 35/23843  | 0.661957 | 0.850644 | 0.837918 | Efna1       |
| GO_BP_m4GO:200103regulation 1/727    | 35/23843  | 0.661957 | 0.850644 | 0.837918 | Ripk1       |
| GO_BP_m4GO:000749mesoderm 3/727      | 111/23843 | 0.662047 | 0.850644 | 0.837918 | Inhba/Sox1  |
| GO_BP_m4GO:190121positive reç 3/727  | 111/23843 | 0.662047 | 0.850644 | 0.837918 | Ager/Ddit3  |
| GO_BP_m4GO:000862extrinsic aç 2/727  | 74/23843  | 0.664003 | 0.851257 | 0.838522 | Lgals3/Pidc |
| GO_BP_m4GO:000906aerobic res 2/727   | 74/23843  | 0.664003 | 0.851257 | 0.838522 | Cyca/Mtfr1  |
| GO_BP_m4GO:003014sphingolipi 2/727   | 74/23843  | 0.664003 | 0.851257 | 0.838522 | A4galt/B3c  |
| GO_BP_m4GO:003246regulation 2/727    | 74/23843  | 0.664003 | 0.851257 | 0.838522 | Aurka/Sstrf |
| GO_BP_m4GO:003272positive reç 2/727  | 74/23843  | 0.664003 | 0.851257 | 0.838522 | Il27/Mir15f |
| GO_BP_m4GO:003320tumor necr 2/727    | 74/23843  | 0.664003 | 0.851257 | 0.838522 | Gas6/Rela   |
| GO_BP_m4GO:004678microtubul 2/727    | 74/23843  | 0.664003 | 0.851257 | 0.838522 | Nav3/Rps3   |
| GO_BP_m4GO:007142ribonucleoı 2/727   | 74/23843  | 0.664003 | 0.851257 | 0.838522 | Srsf10/Tho  |
| GO_BP_m4GO:000268regulation 5/727    | 184/23843 | 0.664126 | 0.851257 | 0.838522 | C3ar1/Gast  |
| GO_BP_m4GO:200123negative re 6/727   | 220/23843 | 0.665213 | 0.852421 | 0.839669 | Ctnna1/Ga   |
| GO_BP_m4GO:000236leukocyte e 7/727   | 256/23843 | 0.667154 | 0.853644 | 0.840873 | Dnase1/lfn  |
| GO_BP_m4GO:000315endotheliu 3/727    | 112/23843 | 0.667979 | 0.853644 | 0.840873 | Abcb1b/Cc   |
| GO_BP_m4GO:004208cytokine bi 3/727   | 112/23843 | 0.667979 | 0.853644 | 0.840873 | Bcl10/Il27/ |
| GO_BP_m4GO:004247inner ear r 3/727   | 112/23843 | 0.667979 | 0.853644 | 0.840873 | Ror2/Spry2  |
| GO_BP_m4GO:004247odontogen 3/727     | 112/23843 | 0.667979 | 0.853644 | 0.840873 | Fgf4/Fst/In |
| GO_BP_m4GO:005082defense reç 3/727   | 112/23843 | 0.667979 | 0.853644 | 0.840873 | AY761184/   |
| GO_BP_m4GO:003432cell junctioı 5/727 | 185/23843 | 0.668765 | 0.853644 | 0.840873 | Cdh24/Cdh   |
| GO_BP_m4GO:004603ATP metab 6/727     | 221/23843 | 0.669463 | 0.853644 | 0.840873 | Ak3/Atp5c:  |
| GO_BP_m4GO:000648protein N- 2/727    | 75/23843  | 0.671188 | 0.853644 | 0.840873 | Mogs/Stt3l  |
| GO_BP_m4GO:000672isoprenoid 2/727    | 75/23843  | 0.671188 | 0.853644 | 0.840873 | Cyp1a2/Pn   |
| GO_BP_m4GO:003314regulation 2/727    | 75/23843  | 0.671188 | 0.853644 | 0.840873 | Esr2/Ube2i  |
| GO_BP_m4GO:007116ribonucleoı 2/727   | 75/23843  | 0.671188 | 0.853644 | 0.840873 | Srsf10/Tho  |
| GO_BP_m4GO:190188regulation 2/727    | 75/23843  | 0.671188 | 0.853644 | 0.840873 | Nedd4l/Np   |
| GO_BP_m4GO:000046maturation 1/727    | 36/23843  | 0.67228  | 0.853644 | 0.840873 | Krr1        |
| GO_BP_m4GO:000170gastrulatioı 1/727  | 36/23843  | 0.67228  | 0.853644 | 0.840873 | Nat8f1      |
| GO_BP_m4GO:000340axis elonga 1/727   | 36/23843  | 0.67228  | 0.853644 | 0.840873 | Spry2       |

|                   |               |        |           |          |          |          |             |
|-------------------|---------------|--------|-----------|----------|----------|----------|-------------|
| GO_BP_m4GO:001083 | positive re   | 1/727  | 36/23843  | 0.67228  | 0.853644 | 0.840873 | Mapk14      |
| GO_BP_m4GO:002179 | cerebral co   | 1/727  | 36/23843  | 0.67228  | 0.853644 | 0.840873 | Rtn4        |
| GO_BP_m4GO:003081 | positive re   | 1/727  | 36/23843  | 0.67228  | 0.853644 | 0.840873 | Tshr        |
| GO_BP_m4GO:003288 | regulation    | 1/727  | 36/23843  | 0.67228  | 0.853644 | 0.840873 | Irs2        |
| GO_BP_m4GO:003530 | positive re   | 1/727  | 36/23843  | 0.67228  | 0.853644 | 0.840873 | Ppp1r15b    |
| GO_BP_m4GO:004476 | multi-orga    | 1/727  | 36/23843  | 0.67228  | 0.853644 | 0.840873 | Gas6        |
| GO_BP_m4GO:004646 | neutral lipi  | 1/727  | 36/23843  | 0.67228  | 0.853644 | 0.840873 | Sik1        |
| GO_BP_m4GO:004646 | acylglycer    | 1/727  | 36/23843  | 0.67228  | 0.853644 | 0.840873 | Sik1        |
| GO_BP_m4GO:004866 | neuron fat    | 1/727  | 36/23843  | 0.67228  | 0.853644 | 0.840873 | Nkx6-2      |
| GO_BP_m4GO:004871 | regulation    | 1/727  | 36/23843  | 0.67228  | 0.853644 | 0.840873 | Ager        |
| GO_BP_m4GO:004882 | erythrocyt    | 1/727  | 36/23843  | 0.67228  | 0.853644 | 0.840873 | Gata1       |
| GO_BP_m4GO:005070 | regulation    | 1/727  | 36/23843  | 0.67228  | 0.853644 | 0.840873 | Gas6        |
| GO_BP_m4GO:005108 | 'de novo' p   | 1/727  | 36/23843  | 0.67228  | 0.853644 | 0.840873 | Dnajb14     |
| GO_BP_m4GO:006025 | regulation    | 1/727  | 36/23843  | 0.67228  | 0.853644 | 0.840873 | Esr2        |
| GO_BP_m4GO:007139 | cellular res  | 1/727  | 36/23843  | 0.67228  | 0.853644 | 0.840873 | Mir451a     |
| GO_BP_m4GO:008600 | regulation    | 1/727  | 36/23843  | 0.67228  | 0.853644 | 0.840873 | Dsp         |
| GO_BP_m4GO:190222 | regulation    | 1/727  | 36/23843  | 0.67228  | 0.853644 | 0.840873 | Rps3        |
| GO_BP_m4GO:190269 | regulation    | 1/727  | 36/23843  | 0.67228  | 0.853644 | 0.840873 | Ctnna1      |
| GO_BP_m4GO:000687 | cellular calc | 12/727 | 433/23843 | 0.672417 | 0.853644 | 0.840873 | C3ar1/Cacr  |
| GO_BP_m4GO:000718 | adenylate c   | 5/727  | 186/23843 | 0.673361 | 0.854616 | 0.841831 | Ffar3/Gnat  |
| GO_BP_m4GO:004593 | negative re   | 6/727  | 222/23843 | 0.673678 | 0.854763 | 0.841975 | Btn2a2/Hu   |
| GO_BP_m4GO:009027 | positive re   | 3/727  | 113/23843 | 0.673834 | 0.854763 | 0.841975 | C1qtnf12/Il |
| GO_BP_m4GO:001623 | macroauto     | 5/727  | 187/23843 | 0.677915 | 0.858994 | 0.846143 | 5330417C2   |
| GO_BP_m4GO:004424 | cellular lipi | 5/727  | 187/23843 | 0.677915 | 0.858994 | 0.846143 | Apoa4/Dec   |
| GO_BP_m4GO:000175 | somitogen     | 2/727  | 76/23843  | 0.678248 | 0.858994 | 0.846143 | Ror2/Zeb2   |
| GO_BP_m4GO:002187 | forebrain n   | 2/727  | 76/23843  | 0.678248 | 0.858994 | 0.846143 | Inhba/Mir2  |
| GO_BP_m4GO:005127 | regulation    | 2/727  | 76/23843  | 0.678248 | 0.858994 | 0.846143 | Il13/Slc8a1 |
| GO_BP_m4GO:006118 | mammary       | 2/727  | 76/23843  | 0.678248 | 0.858994 | 0.846143 | Rtn4/Vdr    |
| GO_BP_m4GO:000269 | positive re   | 12/727 | 435/23843 | 0.678478 | 0.859053 | 0.846201 | Ager/Bcl10  |
| GO_BP_m4GO:001657 | protein del   | 3/727  | 114/23843 | 0.679613 | 0.859053 | 0.846201 | Otud6a/Uc   |
| GO_BP_m4GO:005114 | striated mu   | 8/727  | 295/23843 | 0.680583 | 0.859053 | 0.846201 | Fhl2/Mapk   |
| GO_BP_m4GO:000178 | B cell hom    | 1/727  | 37/23843  | 0.682288 | 0.859053 | 0.846201 | Bcl10       |
| GO_BP_m4GO:000205 | positive re   | 1/727  | 37/23843  | 0.682288 | 0.859053 | 0.846201 | Irs2        |
| GO_BP_m4GO:000282 | negative re   | 1/727  | 37/23843  | 0.682288 | 0.859053 | 0.846201 | Muc4        |
| GO_BP_m4GO:000677 | porphyrin-    | 1/727  | 37/23843  | 0.682288 | 0.859053 | 0.846201 | Cyp1a2      |
| GO_BP_m4GO:000743 | salivary gla  | 1/727  | 37/23843  | 0.682288 | 0.859053 | 0.846201 | Polb        |
| GO_BP_m4GO:002195 | central ner   | 1/727  | 37/23843  | 0.682288 | 0.859053 | 0.846201 | Zeb2        |
| GO_BP_m4GO:003050 | positive re   | 1/727  | 37/23843  | 0.682288 | 0.859053 | 0.846201 | Slc8a1      |
| GO_BP_m4GO:003085 | granulocy     | 1/727  | 37/23843  | 0.682288 | 0.859053 | 0.846201 | Gata1       |
| GO_BP_m4GO:004209 | type 2 imm    | 1/727  | 37/23843  | 0.682288 | 0.859053 | 0.846201 | Socs5       |
| GO_BP_m4GO:004573 | positive re   | 1/727  | 37/23843  | 0.682288 | 0.859053 | 0.846201 | Pim1        |
| GO_BP_m4GO:004588 | positive re   | 1/727  | 37/23843  | 0.682288 | 0.859053 | 0.846201 | Ctnna1      |
| GO_BP_m4GO:004598 | positive re   | 1/727  | 37/23843  | 0.682288 | 0.859053 | 0.846201 | Lck         |
| GO_BP_m4GO:006067 | placenta bl   | 1/727  | 37/23843  | 0.682288 | 0.859053 | 0.846201 | Ovol2       |
| GO_BP_m4GO:007115 | positive re   | 1/727  | 37/23843  | 0.682288 | 0.859053 | 0.846201 | Pidd1       |
| GO_BP_m4GO:007260 | interleukin   | 1/727  | 37/23843  | 0.682288 | 0.859053 | 0.846201 | Gas6        |
| GO_BP_m4GO:009017 | regulation    | 1/727  | 37/23843  | 0.682288 | 0.859053 | 0.846201 | Ror2        |
| GO_BP_m4GO:190289 | regulation    | 1/727  | 37/23843  | 0.682288 | 0.859053 | 0.846201 | Rela        |

|                                       |           |          |          |          |              |
|---------------------------------------|-----------|----------|----------|----------|--------------|
| GO_BP_m4GO:200082regulation 1/727     | 37/23843  | 0.682288 | 0.859053 | 0.846201 | Pim1         |
| GO_BP_m4GO:000227myeloid let 5/727    | 188/23843 | 0.682427 | 0.859053 | 0.846201 | Ager/Bcl10   |
| GO_BP_m4GO:005067positive reç 5/727   | 188/23843 | 0.682427 | 0.859053 | 0.846201 | Cdh3/Erbb    |
| GO_BP_m4GO:000226cell activati 7/727  | 260/23843 | 0.682741 | 0.859222 | 0.846367 | Dnase1/Ifn   |
| GO_BP_m4GO:003577insulin secr 2/727   | 77/23843  | 0.685184 | 0.860877 | 0.847998 | C1qtnf12/T   |
| GO_BP_m4GO:004227ribosomal ; 2/727    | 77/23843  | 0.685184 | 0.860877 | 0.847998 | Krr1/Rps2    |
| GO_BP_m4GO:005145regulation 2/727     | 77/23843  | 0.685184 | 0.860877 | 0.847998 | Car2/Slc9a   |
| GO_BP_m4GO:005175positive reç 2/727   | 77/23843  | 0.685184 | 0.860877 | 0.847998 | Fgf4/Sstr5   |
| GO_BP_m4GO:190166alpha-amir 2/727     | 77/23843  | 0.685184 | 0.860877 | 0.847998 | Fah/Kynu     |
| GO_BP_m4GO:000663acylglycerc 3/727    | 115/23843 | 0.685316 | 0.860877 | 0.847998 | Apoa4/Lipc   |
| GO_BP_m4GO:003266interferon- 3/727    | 115/23843 | 0.685316 | 0.860877 | 0.847998 | Gas6/Il27/I  |
| GO_BP_m4GO:001993second-me 9/727      | 332/23843 | 0.686111 | 0.861502 | 0.848614 | Gpr61/Grr    |
| GO_BP_m4GO:000912nucleoside 7/727     | 261/23843 | 0.686564 | 0.861502 | 0.848614 | Ak3/Atp5c:   |
| GO_BP_m4GO:000961response tr 7/727    | 261/23843 | 0.686564 | 0.861502 | 0.848614 | A230050P2    |
| GO_BP_m4GO:001063epithelial c 7/727   | 261/23843 | 0.686564 | 0.861502 | 0.848614 | Ager/Dusp    |
| GO_BP_m4GO:000636double-str 5/727     | 189/23843 | 0.686895 | 0.861502 | 0.848614 | Brip1/Hus1   |
| GO_BP_m4GO:190296positive reç 5/727   | 189/23843 | 0.686895 | 0.861502 | 0.848614 | Grb2/Nav3    |
| GO_BP_m4GO:000628DNA repair 12/727    | 438/23843 | 0.687447 | 0.861968 | 0.849072 | Faap100/C    |
| GO_BP_m4GO:004689regulation 4/727     | 153/23843 | 0.689754 | 0.86292  | 0.850011 | Apoa4/Htr:   |
| GO_BP_m4GO:007189DNA biosy 4/727      | 153/23843 | 0.689754 | 0.86292  | 0.850011 | C3ar1/Polk   |
| GO_BP_m4GO:003007peptide ho 7/727     | 262/23843 | 0.690358 | 0.86292  | 0.850011 | C1qtnf12/F   |
| GO_BP_m4GO:001802peptidyl-ly 3/727    | 116/23843 | 0.690943 | 0.86292  | 0.850011 | Camkmt/D     |
| GO_BP_m4GO:004216B cell prolif 3/727  | 116/23843 | 0.690943 | 0.86292  | 0.850011 | Ifna12/Il13, |
| GO_BP_m4GO:004216cytokine m 3/727     | 116/23843 | 0.690943 | 0.86292  | 0.850011 | Bcl10/Il27/I |
| GO_BP_m4GO:000057embryonic 1/727      | 38/23843  | 0.69199  | 0.86292  | 0.850011 | Peg12        |
| GO_BP_m4GO:000727synaptic trç 1/727   | 38/23843  | 0.69199  | 0.86292  | 0.850011 | Htr2c        |
| GO_BP_m4GO:003278positive reç 1/727   | 38/23843  | 0.69199  | 0.86292  | 0.850011 | Dynll2       |
| GO_BP_m4GO:004502plasma me 1/727      | 38/23843  | 0.69199  | 0.86292  | 0.850011 | Snap47       |
| GO_BP_m4GO:007221metaneph 1/727       | 38/23843  | 0.69199  | 0.86292  | 0.850011 | Ret          |
| GO_BP_m4GO:009712receptor lo 1/727    | 38/23843  | 0.69199  | 0.86292  | 0.850011 | Snap47       |
| GO_BP_m4GO:009886regulation 1/727     | 38/23843  | 0.69199  | 0.86292  | 0.850011 | Gas6         |
| GO_BP_m4GO:190286positive reç 1/727   | 38/23843  | 0.69199  | 0.86292  | 0.850011 | Anp32b       |
| GO_BP_m4GO:190595negative re 1/727    | 38/23843  | 0.69199  | 0.86292  | 0.850011 | Irs2         |
| GO_BP_m4GO:000694regulation 2/727     | 78/23843  | 0.691997 | 0.86292  | 0.850011 | Dsp/Slc8a1   |
| GO_BP_m4GO:000859regulation 2/727     | 78/23843  | 0.691997 | 0.86292  | 0.850011 | Neurl1a/Ov   |
| GO_BP_m4GO:001092negative re 2/727    | 78/23843  | 0.691997 | 0.86292  | 0.850011 | Rbm26/Tsk    |
| GO_BP_m4GO:004876astrocyte d 2/727    | 78/23843  | 0.691997 | 0.86292  | 0.850011 | Ager/Ror2    |
| GO_BP_m4GO:005196regulation 2/727     | 78/23843  | 0.691997 | 0.86292  | 0.850011 | Grm1/Ror2    |
| GO_BP_m4GO:007061regulation 2/727     | 78/23843  | 0.691997 | 0.86292  | 0.850011 | Astl/F12     |
| GO_BP_m4GO:000716negative re 7/727    | 263/23843 | 0.694122 | 0.86512  | 0.852177 | Ager/Btn2a   |
| GO_BP_m4GO:009013epithelium 7/727     | 263/23843 | 0.694122 | 0.86512  | 0.852177 | Ager/Dusp    |
| GO_BP_m4GO:000663neutral lipic 3/727  | 117/23843 | 0.696494 | 0.867397 | 0.85442  | Apoa4/Lipc   |
| GO_BP_m4GO:000675ATP biosyn 3/727     | 117/23843 | 0.696494 | 0.867397 | 0.85442  | Ak3/Atp5c:   |
| GO_BP_m4GO:001605carbohydrç 3/727     | 117/23843 | 0.696494 | 0.867397 | 0.85442  | Ctbs/Manc    |
| GO_BP_m4GO:006056epithelial ti 10/727 | 371/23843 | 0.697904 | 0.868056 | 0.855069 | Bcl10/Ccm:   |
| GO_BP_m4GO:000244production 8/727     | 300/23843 | 0.69838  | 0.868056 | 0.855069 | Ffar3/Gas6.  |
| GO_BP_m4GO:004667response tr 8/727    | 300/23843 | 0.69838  | 0.868056 | 0.855069 | Lck/Mir7-2   |
| GO_BP_m4GO:003304regulation 2/727     | 79/23843  | 0.698688 | 0.868056 | 0.855069 | Rmi2/Sfpq    |



|                                         |           |          |          |          |                 |
|-----------------------------------------|-----------|----------|----------|----------|-----------------|
| GO_BP_m4GO:004327response to            | 79/23843  | 0.698688 | 0.868056 | 0.855069 | Recql5/Slc6a6   |
| GO_BP_m4GO:190390negative regulation of | 79/23843  | 0.698688 | 0.868056 | 0.855069 | A230050P2       |
| GO_BP_m4GO:007265establishment of       | 155/23843 | 0.699447 | 0.868056 | 0.855069 | Ddit3/Plagl1    |
| GO_BP_m4GO:190290regulation of          | 336/23843 | 0.699508 | 0.868056 | 0.855069 | Arhgap18/       |
| GO_BP_m4GO:000762circadian rhythm       | 192/23843 | 0.700045 | 0.868056 | 0.855069 | Hcrtr1/Prolkr1  |
| GO_BP_m4GO:004863regulation of          | 372/23843 | 0.701053 | 0.868056 | 0.855069 | Anapc2/Dusp10   |
| GO_BP_m4GO:000188receptor mediated      | 39/23843  | 0.701397 | 0.868056 | 0.855069 | Kif16b          |
| GO_BP_m4GO:000283negative regulation of | 39/23843  | 0.701397 | 0.868056 | 0.855069 | Muc4            |
| GO_BP_m4GO:000668glycosphingolipid      | 39/23843  | 0.701397 | 0.868056 | 0.855069 | A4galt          |
| GO_BP_m4GO:002198pituitary gland        | 39/23843  | 0.701397 | 0.868056 | 0.855069 | Duox2           |
| GO_BP_m4GO:003043sleep                  | 39/23843  | 0.701397 | 0.868056 | 0.855069 | Hcrtr1          |
| GO_BP_m4GO:003086cortical actin         | 39/23843  | 0.701397 | 0.868056 | 0.855069 | Wipf2           |
| GO_BP_m4GO:003287negative regulation of | 39/23843  | 0.701397 | 0.868056 | 0.855069 | Dusp10          |
| GO_BP_m4GO:003545cellular respiration   | 39/23843  | 0.701397 | 0.868056 | 0.855069 | F830016B0       |
| GO_BP_m4GO:004327apoptotic cell         | 39/23843  | 0.701397 | 0.868056 | 0.855069 | Gas6            |
| GO_BP_m4GO:004585pH reduction           | 39/23843  | 0.701397 | 0.868056 | 0.855069 | Car2            |
| GO_BP_m4GO:005128positive regulation of | 39/23843  | 0.701397 | 0.868056 | 0.855069 | Il13            |
| GO_BP_m4GO:006012inner ear              | 39/23843  | 0.701397 | 0.868056 | 0.855069 | Tshr            |
| GO_BP_m4GO:007030negative regulation of | 39/23843  | 0.701397 | 0.868056 | 0.855069 | Dusp10          |
| GO_BP_m4GO:190290regulation of          | 39/23843  | 0.701397 | 0.868056 | 0.855069 | Vdr             |
| GO_BP_m4GO:009013tissue migration       | 265/23843 | 0.701562 | 0.868056 | 0.855069 | Ager/Dusp10     |
| GO_BP_m4GO:000193regulation of          | 118/23843 | 0.701969 | 0.868335 | 0.855344 | Ager/Myd88      |
| GO_BP_m4GO:001097positive regulation of | 337/23843 | 0.7028   | 0.869138 | 0.856135 | Anapc2/Its1     |
| GO_BP_m4GO:000865phospholipid           | 156/23843 | 0.704211 | 0.870595 | 0.857571 | Htr2c/Pigg      |
| GO_BP_m4GO:000640mRNA cat               | 193/23843 | 0.704343 | 0.870595 | 0.857571 | Cnot6/Eif3e     |
| GO_BP_m4GO:005070regulation of          | 444/23843 | 0.704935 | 0.870601 | 0.857576 | Btn2a2/C1orf112 |
| GO_BP_m4GO:004426cellular carcinoma     | 266/23843 | 0.705237 | 0.870601 | 0.857576 | B3gnt5/C1orf112 |
| GO_BP_m4GO:000315outflow tract          | 80/23843  | 0.705258 | 0.870601 | 0.857576 | Folr1/Sox11     |
| GO_BP_m4GO:002167nerve development      | 80/23843  | 0.705258 | 0.870601 | 0.857576 | Ret/Rpl24       |
| GO_BP_m4GO:190331regulation of          | 80/23843  | 0.705258 | 0.870601 | 0.857576 | Astl/F12        |
| GO_BP_m4GO:000647protein de             | 230/23843 | 0.706149 | 0.871476 | 0.858438 | 4933415F2       |
| GO_BP_m4GO:004348regulation of          | 119/23843 | 0.707368 | 0.871914 | 0.85887  | Rbfox3/Srsf10   |
| GO_BP_m4GO:004648phosphatic             | 119/23843 | 0.707368 | 0.871914 | 0.85887  | Htr2c/Pigg      |
| GO_BP_m4GO:006053muscle tissue          | 445/23843 | 0.707791 | 0.871914 | 0.85887  | Cops2/Dsp       |
| GO_BP_m4GO:000301vascular pro           | 194/23843 | 0.708597 | 0.871914 | 0.85887  | Cacna1g/E       |
| GO_BP_m4GO:003103actomyosin             | 194/23843 | 0.708597 | 0.871914 | 0.85887  | Eln/Myom2       |
| GO_BP_m4GO:000193negative regulation of | 40/23843  | 0.710516 | 0.871914 | 0.85887  | Ager            |
| GO_BP_m4GO:000282negative regulation of | 40/23843  | 0.710516 | 0.871914 | 0.85887  | Muc4            |
| GO_BP_m4GO:000315regulation of          | 40/23843  | 0.710516 | 0.871914 | 0.85887  | Pim1            |
| GO_BP_m4GO:000618cGMP biosynthesis      | 40/23843  | 0.710516 | 0.871914 | 0.85887  | Htr2c           |
| GO_BP_m4GO:000637mRNA poly              | 40/23843  | 0.710516 | 0.871914 | 0.85887  | Nelfe           |
| GO_BP_m4GO:000911nucleobase             | 40/23843  | 0.710516 | 0.871914 | 0.85887  | Aox3            |
| GO_BP_m4GO:001569organic cat            | 40/23843  | 0.710516 | 0.871914 | 0.85887  | Htr2c           |
| GO_BP_m4GO:001660Rac protein            | 40/23843  | 0.710516 | 0.871914 | 0.85887  | Tiam1           |
| GO_BP_m4GO:003080positive regulation of | 40/23843  | 0.710516 | 0.871914 | 0.85887  | Tshr            |
| GO_BP_m4GO:003245regulation of          | 40/23843  | 0.710516 | 0.871914 | 0.85887  | Trabd2b         |
| GO_BP_m4GO:003334cholesterol            | 40/23843  | 0.710516 | 0.871914 | 0.85887  | Apoa4           |
| GO_BP_m4GO:003541protein loc            | 40/23843  | 0.710516 | 0.871914 | 0.85887  | Snap47          |

|                                     |           |          |          |          |             |
|-------------------------------------|-----------|----------|----------|----------|-------------|
| GO_BP_m4GO:004873epidermis r1/727   | 40/23843  | 0.710516 | 0.871914 | 0.85887  | Fst         |
| GO_BP_m4GO:004887homeostas1/727     | 40/23843  | 0.710516 | 0.871914 | 0.85887  | Gata1       |
| GO_BP_m4GO:006060mammary1/727       | 40/23843  | 0.710516 | 0.871914 | 0.85887  | Vdr         |
| GO_BP_m4GO:009875ncRNA trar1/727    | 40/23843  | 0.710516 | 0.871914 | 0.85887  | Npm3        |
| GO_BP_m4GO:190403positive reç1/727  | 40/23843  | 0.710516 | 0.871914 | 0.85887  | Pim1        |
| GO_BP_m4GO:000193positive reç2/727  | 81/23843  | 0.711708 | 0.872481 | 0.859428 | Mydgf/Pdc   |
| GO_BP_m4GO:001590fatty acid tı2/727 | 81/23843  | 0.711708 | 0.872481 | 0.859428 | Abcc4/Irs2  |
| GO_BP_m4GO:001921regulation 2/727   | 81/23843  | 0.711708 | 0.872481 | 0.859428 | Apoa4/Irs2  |
| GO_BP_m4GO:003202positive reç2/727  | 81/23843  | 0.711708 | 0.872481 | 0.859428 | C1qtnf12/Il |
| GO_BP_m4GO:001092regulation 3/727   | 120/23843 | 0.712692 | 0.873128 | 0.860065 | Ppp1r15b/   |
| GO_BP_m4GO:004533cellular resı4/727 | 158/23843 | 0.713575 | 0.873128 | 0.860065 | Cyca/Cyp11  |
| GO_BP_m4GO:001003response tr6/727   | 232/23843 | 0.713914 | 0.873128 | 0.860065 | Aqp9/Cacr   |
| GO_BP_m4GO:001082regulation 5/727   | 196/23843 | 0.716977 | 0.873128 | 0.860065 | Pid1/Plagl2 |
| GO_BP_m4GO:004355ear develoı6/727   | 233/23843 | 0.717744 | 0.873128 | 0.860065 | Anp32b/Cc   |
| GO_BP_m4GO:001810peptidyl-tr3/727   | 121/23843 | 0.717942 | 0.873128 | 0.860065 | Camk1g/D    |
| GO_BP_m4GO:004845synaptic ve3/727   | 121/23843 | 0.717942 | 0.873128 | 0.860065 | Rims4/Snaı  |
| GO_BP_m4GO:009745establishmı3/727   | 121/23843 | 0.717942 | 0.873128 | 0.860065 | Rims4/Snaı  |
| GO_BP_m4GO:000042autophagy 2/727    | 82/23843  | 0.718039 | 0.873128 | 0.860065 | Fundc2/To   |
| GO_BP_m4GO:003064regulation 2/727   | 82/23843  | 0.718039 | 0.873128 | 0.860065 | Car2/Slc9a  |
| GO_BP_m4GO:003111regulation 2/727   | 82/23843  | 0.718039 | 0.873128 | 0.860065 | Nav3/Rps3   |
| GO_BP_m4GO:003294negative re2/727   | 82/23843  | 0.718039 | 0.873128 | 0.860065 | Btn2a2/Erb  |
| GO_BP_m4GO:003530regulation 2/727   | 82/23843  | 0.718039 | 0.873128 | 0.860065 | 4933415F2   |
| GO_BP_m4GO:005067negative re2/727   | 82/23843  | 0.718039 | 0.873128 | 0.860065 | Btn2a2/Erb  |
| GO_BP_m4GO:006172mitochond2/727     | 82/23843  | 0.718039 | 0.873128 | 0.860065 | Fundc2/To   |
| GO_BP_m4GO:000703vacuole orç4/727   | 159/23843 | 0.718175 | 0.873128 | 0.860065 | 5330417C2   |
| GO_BP_m4GO:007055protein loc4/727   | 159/23843 | 0.718175 | 0.873128 | 0.860065 | Ddit3/Plagl |
| GO_BP_m4GO:000196positive reç1/727  | 41/23843  | 0.719358 | 0.873128 | 0.860065 | Gas6        |
| GO_BP_m4GO:000650membrane1/727      | 41/23843  | 0.719358 | 0.873128 | 0.860065 | Adam19      |
| GO_BP_m4GO:000660prostanoid1/727    | 41/23843  | 0.719358 | 0.873128 | 0.860065 | Ces2h       |
| GO_BP_m4GO:000660prostaglanı1/727   | 41/23843  | 0.719358 | 0.873128 | 0.860065 | Ces2h       |
| GO_BP_m4GO:000733binding of 1/727   | 41/23843  | 0.719358 | 0.873128 | 0.860065 | Astl        |
| GO_BP_m4GO:000743salivary gla1/727  | 41/23843  | 0.719358 | 0.873128 | 0.860065 | Polb        |
| GO_BP_m4GO:000926response tr1/727   | 41/23843  | 0.719358 | 0.873128 | 0.860065 | Kcne1       |
| GO_BP_m4GO:001047regulation 1/727   | 41/23843  | 0.719358 | 0.873128 | 0.860065 | Sox17       |
| GO_BP_m4GO:001090positive reç1/727  | 41/23843  | 0.719358 | 0.873128 | 0.860065 | Irs2        |
| GO_BP_m4GO:001967NAD metal1/727     | 41/23843  | 0.719358 | 0.873128 | 0.860065 | Kynu        |
| GO_BP_m4GO:002152spinal cord1/727   | 41/23843  | 0.719358 | 0.873128 | 0.860065 | Nkx6-2      |
| GO_BP_m4GO:003281regulation 1/727   | 41/23843  | 0.719358 | 0.873128 | 0.860065 | Gas6        |
| GO_BP_m4GO:003296regulation 1/727   | 41/23843  | 0.719358 | 0.873128 | 0.860065 | Ager        |
| GO_BP_m4GO:004215ketone bioı1/727   | 41/23843  | 0.719358 | 0.873128 | 0.860065 | Coq6        |
| GO_BP_m4GO:004663positive reç1/727  | 41/23843  | 0.719358 | 0.873128 | 0.860065 | Socs5       |
| GO_BP_m4GO:005069regulation 1/727   | 41/23843  | 0.719358 | 0.873128 | 0.860065 | Il27        |
| GO_BP_m4GO:006101positive reç1/727  | 41/23843  | 0.719358 | 0.873128 | 0.860065 | Zfp3611     |
| GO_BP_m4GO:006102establishmı1/727   | 41/23843  | 0.719358 | 0.873128 | 0.860065 | Abcb1b      |
| GO_BP_m4GO:006151protein loc1/727   | 41/23843  | 0.719358 | 0.873128 | 0.860065 | Wdr35       |
| GO_BP_m4GO:009034regulation 1/727   | 41/23843  | 0.719358 | 0.873128 | 0.860065 | Rbl1        |
| GO_BP_m4GO:009703regulation 1/727   | 41/23843  | 0.719358 | 0.873128 | 0.860065 | Abcb4       |
| GO_BP_m4GO:190266regulation 1/727   | 41/23843  | 0.719358 | 0.873128 | 0.860065 | Zswim4      |

|                   |              |        |           |          |          |          |             |
|-------------------|--------------|--------|-----------|----------|----------|----------|-------------|
| GO_BP_m4GO:00105C | regulation   | 6/727  | 234/23843 | 0.721538 | 0.875551 | 0.862452 | 5330417C2   |
| GO_BP_m4GO:00069C | nucleus org  | 3/727  | 122/23843 | 0.723116 | 0.875654 | 0.862554 | Agap3/Par   |
| GO_BP_m4GO:00095E | detection c  | 3/727  | 122/23843 | 0.723116 | 0.875654 | 0.862554 | Cabp4/Gna   |
| GO_BP_m4GO:003192 | TOR signal   | 3/727  | 122/23843 | 0.723116 | 0.875654 | 0.862554 | Akt1s1/Gas  |
| GO_BP_m4GO:00511C | regulation   | 3/727  | 122/23843 | 0.723116 | 0.875654 | 0.862554 | Ager/Ddit3  |
| GO_BP_m4GO:190332 | positive re  | 3/727  | 122/23843 | 0.723116 | 0.875654 | 0.862554 | Bcl10/Rps2  |
| GO_BP_m4GO:00085E | regulation   | 2/727  | 83/23843  | 0.724253 | 0.875654 | 0.862554 | Ctnna1/Kct  |
| GO_BP_m4GO:003243 | positive re  | 2/727  | 83/23843  | 0.724253 | 0.875654 | 0.862554 | Aurka/Socs  |
| GO_BP_m4GO:00468E | positive re  | 2/727  | 83/23843  | 0.724253 | 0.875654 | 0.862554 | Apoa4/Htr   |
| GO_BP_m4GO:00162C | regulation   | 4/727  | 161/23843 | 0.72721  | 0.875654 | 0.862554 | Mapk14/M    |
| GO_BP_m4GO:00002C | mitochond    | 1/727  | 42/23843  | 0.72793  | 0.875654 | 0.862554 | Mtfr1       |
| GO_BP_m4GO:00003E | regulation   | 1/727  | 42/23843  | 0.72793  | 0.875654 | 0.862554 | Rbfox3      |
| GO_BP_m4GO:00009E | mitochond    | 1/727  | 42/23843  | 0.72793  | 0.875654 | 0.862554 | Ears2       |
| GO_BP_m4GO:000597 | glycogen b   | 1/727  | 42/23843  | 0.72793  | 0.875654 | 0.862554 | Irs2        |
| GO_BP_m4GO:00070E | mitotic me   | 1/727  | 42/23843  | 0.72793  | 0.875654 | 0.862554 | Spdl1       |
| GO_BP_m4GO:00092E | glucan bio   | 1/727  | 42/23843  | 0.72793  | 0.875654 | 0.862554 | Irs2        |
| GO_BP_m4GO:00107C | regulation   | 1/727  | 42/23843  | 0.72793  | 0.875654 | 0.862554 | Spry2       |
| GO_BP_m4GO:001097 | negative re  | 1/727  | 42/23843  | 0.72793  | 0.875654 | 0.862554 | Hus1        |
| GO_BP_m4GO:00182C | peptidyl-p   | 1/727  | 42/23843  | 0.72793  | 0.875654 | 0.862554 | Ppid        |
| GO_BP_m4GO:00308C | negative re  | 1/727  | 42/23843  | 0.72793  | 0.875654 | 0.862554 | Pid1        |
| GO_BP_m4GO:00310E | negative re  | 1/727  | 42/23843  | 0.72793  | 0.875654 | 0.862554 | Trip12      |
| GO_BP_m4GO:00328E | regulation   | 1/727  | 42/23843  | 0.72793  | 0.875654 | 0.862554 | Irs2        |
| GO_BP_m4GO:003592 | cellular res | 1/727  | 42/23843  | 0.72793  | 0.875654 | 0.862554 | Mapk14      |
| GO_BP_m4GO:004001 | positive re  | 1/727  | 42/23843  | 0.72793  | 0.875654 | 0.862554 | Tshr        |
| GO_BP_m4GO:004207 | intraciliary | 1/727  | 42/23843  | 0.72793  | 0.875654 | 0.862554 | Wdr35       |
| GO_BP_m4GO:00423C | positive re  | 1/727  | 42/23843  | 0.72793  | 0.875654 | 0.862554 | Mapk14      |
| GO_BP_m4GO:004241 | dopamine     | 1/727  | 42/23843  | 0.72793  | 0.875654 | 0.862554 | Htr2c       |
| GO_BP_m4GO:004277 | intrinsic ap | 1/727  | 42/23843  | 0.72793  | 0.875654 | 0.862554 | Phlda3      |
| GO_BP_m4GO:004363 | RNA polya    | 1/727  | 42/23843  | 0.72793  | 0.875654 | 0.862554 | Nelfe       |
| GO_BP_m4GO:005167 | membrane     | 1/727  | 42/23843  | 0.72793  | 0.875654 | 0.862554 | AY761184    |
| GO_BP_m4GO:006013 | maternal p   | 1/727  | 42/23843  | 0.72793  | 0.875654 | 0.862554 | Vdr         |
| GO_BP_m4GO:00701C | positive re  | 1/727  | 42/23843  | 0.72793  | 0.875654 | 0.862554 | Slc8a1      |
| GO_BP_m4GO:190037 | negative re  | 1/727  | 42/23843  | 0.72793  | 0.875654 | 0.862554 | Pid1        |
| GO_BP_m4GO:00073E | determinat   | 3/727  | 123/23843 | 0.728216 | 0.875654 | 0.862554 | Folr1/Ovol  |
| GO_BP_m4GO:00095E | detection c  | 3/727  | 123/23843 | 0.728216 | 0.875654 | 0.862554 | Cabp4/Gna   |
| GO_BP_m4GO:00459C | regulation   | 3/727  | 123/23843 | 0.728216 | 0.875654 | 0.862554 | Gata1/Sox   |
| GO_BP_m4GO:19001E | regulation   | 3/727  | 123/23843 | 0.728216 | 0.875654 | 0.862554 | Dclk3/Gas   |
| GO_BP_m4GO:002153 | telencepha   | 6/727  | 236/23843 | 0.729019 | 0.876399 | 0.863288 | Fezf1/Inh   |
| GO_BP_m4GO:003052 | intracellula | 5/727  | 199/23843 | 0.729223 | 0.876424 | 0.863312 | Esr2/Pim1/  |
| GO_BP_m4GO:004341 | macromole    | 7/727  | 273/23843 | 0.730117 | 0.877118 | 0.863996 | Bhmt/Cam    |
| GO_BP_m4GO:004583 | negative re  | 2/727  | 84/23843  | 0.730351 | 0.877118 | 0.863996 | Pik3ip1/Sik |
| GO_BP_m4GO:19059E | positive re  | 2/727  | 84/23843  | 0.730351 | 0.877118 | 0.863996 | Abcb4/Apc   |
| GO_BP_m4GO:00072E | spermatog    | 13/727 | 489/23843 | 0.731227 | 0.877924 | 0.864789 | Brip1/Cats  |
| GO_BP_m4GO:00458E | negative re  | 9/727  | 346/23843 | 0.731389 | 0.877924 | 0.864789 | Dpep1/Efn   |
| GO_BP_m4GO:003133 | positive re  | 6/727  | 237/23843 | 0.732706 | 0.879224 | 0.86607  | Cnot6/Grb   |
| GO_BP_m4GO:003134 | negative re  | 5/727  | 200/23843 | 0.733219 | 0.879224 | 0.86607  | Ager/Dusp   |
| GO_BP_m4GO:000242 | immune re    | 8/727  | 311/23843 | 0.735243 | 0.879224 | 0.86607  | Bcl10/Btn2  |
| GO_BP_m4GO:00017C | cell fate de | 1/727  | 43/23843  | 0.73624  | 0.879224 | 0.86607  | Sox17       |

|                                     |           |          |          |          |              |
|-------------------------------------|-----------|----------|----------|----------|--------------|
| GO_BP_m4GO:000196negative re1/727   | 43/23843  | 0.73624  | 0.879224 | 0.86607  | Gas6         |
| GO_BP_m4GO:000762adult walki1/727   | 43/23843  | 0.73624  | 0.879224 | 0.86607  | Uchl3        |
| GO_BP_m4GO:003111negative re1/727   | 43/23843  | 0.73624  | 0.879224 | 0.86607  | Nav3         |
| GO_BP_m4GO:004519establishm1/727    | 43/23843  | 0.73624  | 0.879224 | 0.86607  | Mtcl1        |
| GO_BP_m4GO:00507Cinterleukin·1/727  | 43/23843  | 0.73624  | 0.879224 | 0.86607  | Gas6         |
| GO_BP_m4GO:007052platelet ag1/727   | 43/23843  | 0.73624  | 0.879224 | 0.86607  | Gata1        |
| GO_BP_m4GO:007053protein K61/727    | 43/23843  | 0.73624  | 0.879224 | 0.86607  | Trip12       |
| GO_BP_m4GO:190103regulation 1/727   | 43/23843  | 0.73624  | 0.879224 | 0.86607  | Ripk1        |
| GO_BP_m4GO:190311regulation 1/727   | 43/23843  | 0.73624  | 0.879224 | 0.86607  | Dsp          |
| GO_BP_m4GO:200005negative re1/727   | 43/23843  | 0.73624  | 0.879224 | 0.86607  | Pdcl3        |
| GO_BP_m4GO:004247odontogen2/727     | 85/23843  | 0.736334 | 0.879224 | 0.86607  | Fgf4/Fst     |
| GO_BP_m4GO:00435Cregulation 2/727   | 85/23843  | 0.736334 | 0.879224 | 0.86607  | Gtf2ird1/N   |
| GO_BP_m4GO:00459Epositive re2/727   | 85/23843  | 0.736334 | 0.879224 | 0.86607  | Pid1/Tshr    |
| GO_BP_m4GO:006041muscle tiss2/727   | 85/23843  | 0.736334 | 0.879224 | 0.86607  | Dsp/Myom     |
| GO_BP_m4GO:006184antimicrob2/727    | 85/23843  | 0.736334 | 0.879224 | 0.86607  | AY761184/    |
| GO_BP_m4GO:007066negative re2/727   | 85/23843  | 0.736334 | 0.879224 | 0.86607  | Btn2a2/Erb   |
| GO_BP_m4GO:190054positive re2/727   | 85/23843  | 0.736334 | 0.879224 | 0.86607  | Pid1/Tshr    |
| GO_BP_m4GO:001095negative re5/727   | 201/23843 | 0.737172 | 0.880005 | 0.866839 | Dpep1/Gas    |
| GO_BP_m4GO:004687hormone s9/727     | 348/23843 | 0.737485 | 0.880159 | 0.866991 | C1qtnf12/F   |
| GO_BP_m4GO:001921regulation 8/727   | 312/23843 | 0.738436 | 0.881074 | 0.867892 | Apoa4/Htr    |
| GO_BP_m4GO:000266negative re4/727   | 164/23843 | 0.740356 | 0.882483 | 0.869281 | Btn2a2/Erb   |
| GO_BP_m4GO:00353Cregulation 4/727   | 164/23843 | 0.740356 | 0.882483 | 0.869281 | 4933415F2    |
| GO_BP_m4GO:005117import intc4/727   | 164/23843 | 0.740356 | 0.882483 | 0.869281 | Agap3/Gas    |
| GO_BP_m4GO:190186regulation 4/727   | 164/23843 | 0.740356 | 0.882483 | 0.869281 | Mapk14/M     |
| GO_BP_m4GO:004244hormone n5/727     | 202/23843 | 0.741082 | 0.883129 | 0.869917 | Akr1d1/Du    |
| GO_BP_m4GO:000165metaneph2/727      | 86/23843  | 0.742203 | 0.884024 | 0.870799 | Ret/Slc5a1   |
| GO_BP_m4GO:00513Cchromosor2/727     | 86/23843  | 0.742203 | 0.884024 | 0.870799 | Cenps/Rec    |
| GO_BP_m4GO:00027Cregulation 3/727   | 126/23843 | 0.743074 | 0.884315 | 0.871085 | Ffar3/Il13/I |
| GO_BP_m4GO:000663fatty acid b3/727  | 126/23843 | 0.743074 | 0.884315 | 0.871085 | Apoa4/Lip    |
| GO_BP_m4GO:000709mitotic cell3/727  | 126/23843 | 0.743074 | 0.884315 | 0.871085 | Hus1/Pidd    |
| GO_BP_m4GO:00069Cvesicle doc1/727   | 44/23843  | 0.744297 | 0.884315 | 0.871085 | Rab40b       |
| GO_BP_m4GO:003289positive re1/727   | 44/23843  | 0.744297 | 0.884315 | 0.871085 | Htr2c        |
| GO_BP_m4GO:004312negative re1/727   | 44/23843  | 0.744297 | 0.884315 | 0.871085 | Ripk1        |
| GO_BP_m4GO:006161pri-miRNA1/727     | 44/23843  | 0.744297 | 0.884315 | 0.871085 | Rela         |
| GO_BP_m4GO:006191selective at1/727  | 44/23843  | 0.744297 | 0.884315 | 0.871085 | Tomm7        |
| GO_BP_m4GO:00906Ewalking be1/727    | 44/23843  | 0.744297 | 0.884315 | 0.871085 | Uchl3        |
| GO_BP_m4GO:190314regulation 1/727   | 44/23843  | 0.744297 | 0.884315 | 0.871085 | Tomm7        |
| GO_BP_m4GO:004863regulation 4/727   | 165/23843 | 0.744629 | 0.88449  | 0.871258 | Mapk14/M     |
| GO_BP_m4GO:00335Ccarbohydr6/727     | 241/23843 | 0.747099 | 0.886764 | 0.873498 | Ager/C1qtr   |
| GO_BP_m4GO:004259glucose ho6/727    | 241/23843 | 0.747099 | 0.886764 | 0.873498 | Ager/C1qtr   |
| GO_BP_m4GO:000918ribonucleo:2/727   | 87/23843  | 0.747961 | 0.886764 | 0.873498 | Ak3/Nudt5    |
| GO_BP_m4GO:002187forebrain g2/727   | 87/23843  | 0.747961 | 0.886764 | 0.873498 | Inhba/Mir2   |
| GO_BP_m4GO:003307T cell differ2/727 | 87/23843  | 0.747961 | 0.886764 | 0.873498 | ErbB2/Zfp3   |
| GO_BP_m4GO:003444substrate a2/727   | 87/23843  | 0.747961 | 0.886764 | 0.873498 | Efna1/Parv   |
| GO_BP_m4GO:00160Ecarbohydr5/727     | 204/23843 | 0.748774 | 0.886764 | 0.873498 | B3gnt5/Cal   |
| GO_BP_m4GO:000165temperatur1/727    | 45/23843  | 0.752108 | 0.886764 | 0.873498 | Hcrt         |
| GO_BP_m4GO:000263positive re1/727   | 45/23843  | 0.752108 | 0.886764 | 0.873498 | Il13         |
| GO_BP_m4GO:000752myoblast fi1/727   | 45/23843  | 0.752108 | 0.886764 | 0.873498 | Mapk14       |

|                   |                           |       |           |          |          |          |               |
|-------------------|---------------------------|-------|-----------|----------|----------|----------|---------------|
| GO_BP_m4GO:001046 | regulation                | 1/727 | 45/23843  | 0.752108 | 0.886764 | 0.873498 | Irs2          |
| GO_BP_m4GO:001071 | positive reg              | 1/727 | 45/23843  | 0.752108 | 0.886764 | 0.873498 | Ager          |
| GO_BP_m4GO:003015 | collagen fibril           | 1/727 | 45/23843  | 0.752108 | 0.886764 | 0.873498 | Lum           |
| GO_BP_m4GO:003052 | androgen response         | 1/727 | 45/23843  | 0.752108 | 0.886764 | 0.873498 | Esr2          |
| GO_BP_m4GO:003085 | negative regulation       | 1/727 | 45/23843  | 0.752108 | 0.886764 | 0.873498 | Ovol2         |
| GO_BP_m4GO:003164 | protein degradation       | 1/727 | 45/23843  | 0.752108 | 0.886764 | 0.873498 | Sox17         |
| GO_BP_m4GO:003301 | tetrapyrrole biosynthesis | 1/727 | 45/23843  | 0.752108 | 0.886764 | 0.873498 | Cyp1a2        |
| GO_BP_m4GO:004590 | positive regulation       | 1/727 | 45/23843  | 0.752108 | 0.886764 | 0.873498 | Htr2c         |
| GO_BP_m4GO:004801 | vascular endothelial cell | 1/727 | 45/23843  | 0.752108 | 0.886764 | 0.873498 | Mapk14        |
| GO_BP_m4GO:005089 | multicellular organism    | 1/727 | 45/23843  | 0.752108 | 0.886764 | 0.873498 | Gak           |
| GO_BP_m4GO:005195 | regulation                | 1/727 | 45/23843  | 0.752108 | 0.886764 | 0.873498 | Htr2c         |
| GO_BP_m4GO:006041 | ventricular muscle cell   | 1/727 | 45/23843  | 0.752108 | 0.886764 | 0.873498 | Nfatc1        |
| GO_BP_m4GO:006061 | adipose tissue            | 1/727 | 45/23843  | 0.752108 | 0.886764 | 0.873498 | Slc25a25      |
| GO_BP_m4GO:006076 | positive regulation       | 1/727 | 45/23843  | 0.752108 | 0.886764 | 0.873498 | Gas6          |
| GO_BP_m4GO:007124 | cellular response         | 1/727 | 45/23843  | 0.752108 | 0.886764 | 0.873498 | Ly6g6d        |
| GO_BP_m4GO:007130 | cellular response         | 1/727 | 45/23843  | 0.752108 | 0.886764 | 0.873498 | Ret           |
| GO_BP_m4GO:009015 | regulation                | 1/727 | 45/23843  | 0.752108 | 0.886764 | 0.873498 | Wdr35         |
| GO_BP_m4GO:009032 | regulation                | 1/727 | 45/23843  | 0.752108 | 0.886764 | 0.873498 | Pid1          |
| GO_BP_m4GO:190044 | regulation                | 1/727 | 45/23843  | 0.752108 | 0.886764 | 0.873498 | Arc           |
| GO_BP_m4GO:190237 | negative regulation       | 1/727 | 45/23843  | 0.752108 | 0.886764 | 0.873498 | Nbas          |
| GO_BP_m4GO:003440 | nucleobase metabolic      | 4/727 | 167/23843 | 0.753016 | 0.887397 | 0.874121 | Nme5/Nuc      |
| GO_BP_m4GO:009716 | ammonium ion              | 4/727 | 167/23843 | 0.753016 | 0.887397 | 0.874121 | Apoa4/Gdfr    |
| GO_BP_m4GO:000906 | cellular amino acid       | 2/727 | 88/23843  | 0.753607 | 0.887875 | 0.874592 | Fah/Kynu      |
| GO_BP_m4GO:000705 | chromosome                | 8/727 | 317/23843 | 0.754003 | 0.888122 | 0.874835 | Cenps/Brip    |
| GO_BP_m4GO:000269 | positive regulation       | 5/727 | 206/23843 | 0.756295 | 0.889115 | 0.875813 | Ffar3/Il13/It |
| GO_BP_m4GO:004343 | negative regulation       | 4/727 | 168/23843 | 0.757129 | 0.889115 | 0.875813 | Ddit3/Gas6    |
| GO_BP_m4GO:000170 | cell fate specification   | 2/727 | 89/23843  | 0.759144 | 0.889115 | 0.875813 | Nkx6-2/So     |
| GO_BP_m4GO:005507 | iron ion homeostasis      | 2/727 | 89/23843  | 0.759144 | 0.889115 | 0.875813 | Heph/Slc25a   |
| GO_BP_m4GO:007055 | response to toxic         | 2/727 | 89/23843  | 0.759144 | 0.889115 | 0.875813 | Rela/Ythdc    |
| GO_BP_m4GO:000232 | natural killer cell       | 1/727 | 46/23843  | 0.759681 | 0.889115 | 0.875813 | Ifna12        |
| GO_BP_m4GO:000699 | nuclear envelope          | 1/727 | 46/23843  | 0.759681 | 0.889115 | 0.875813 | Parp11        |
| GO_BP_m4GO:000703 | endosome                  | 1/727 | 46/23843  | 0.759681 | 0.889115 | 0.875813 | Rilp          |
| GO_BP_m4GO:000906 | aspartate family          | 1/727 | 46/23843  | 0.759681 | 0.889115 | 0.875813 | Bhmt          |
| GO_BP_m4GO:001071 | regulation                | 1/727 | 46/23843  | 0.759681 | 0.889115 | 0.875813 | Ager          |
| GO_BP_m4GO:001819 | peptidyl-cysteine         | 1/727 | 46/23843  | 0.759681 | 0.889115 | 0.875813 | Zdhhc22       |
| GO_BP_m4GO:002260 | ovulation cycle           | 1/727 | 46/23843  | 0.759681 | 0.889115 | 0.875813 | Inhba         |
| GO_BP_m4GO:003052 | intracellular             | 1/727 | 46/23843  | 0.759681 | 0.889115 | 0.875813 | Esr2          |
| GO_BP_m4GO:003166 | lipopolysaccharide        | 1/727 | 46/23843  | 0.759681 | 0.889115 | 0.875813 | Mapk14        |
| GO_BP_m4GO:003230 | icosanoid synthesis       | 1/727 | 46/23843  | 0.759681 | 0.889115 | 0.875813 | Abcc4         |
| GO_BP_m4GO:003411 | heterotypic               | 1/727 | 46/23843  | 0.759681 | 0.889115 | 0.875813 | Dsp           |
| GO_BP_m4GO:003503 | sperm-egg                 | 1/727 | 46/23843  | 0.759681 | 0.889115 | 0.875813 | Astl          |
| GO_BP_m4GO:004226 | regulation                | 1/727 | 46/23843  | 0.759681 | 0.889115 | 0.875813 | Serpinb9      |
| GO_BP_m4GO:004853 | spleen development        | 1/727 | 46/23843  | 0.759681 | 0.889115 | 0.875813 | Polb          |
| GO_BP_m4GO:004859 | oocyte development        | 1/727 | 46/23843  | 0.759681 | 0.889115 | 0.875813 | Aurka         |
| GO_BP_m4GO:005143 | regulation                | 1/727 | 46/23843  | 0.759681 | 0.889115 | 0.875813 | Rps2          |
| GO_BP_m4GO:005148 | regulation                | 1/727 | 46/23843  | 0.759681 | 0.889115 | 0.875813 | Neurl1a       |
| GO_BP_m4GO:007269 | protein localization      | 1/727 | 46/23843  | 0.759681 | 0.889115 | 0.875813 | Aurka         |
| GO_BP_m4GO:009010 | cochlea development       | 1/727 | 46/23843  | 0.759681 | 0.889115 | 0.875813 | Tshr          |

|                                               |           |          |          |          |            |
|-----------------------------------------------|-----------|----------|----------|----------|------------|
| GO_BP_m4GO:009869regulation 1/727             | 46/23843  | 0.759681 | 0.889115 | 0.875813 | Rims4      |
| GO_BP_m4GO:200116regulation 1/727             | 46/23843  | 0.759681 | 0.889115 | 0.875813 | Pid1       |
| GO_BP_m4GO:003001establishment 3/727          | 130/23843 | 0.761871 | 0.89146  | 0.878123 | Frmd4b/Sp  |
| GO_BP_m4GO:000246adaptive immunity 10/727     | 393/23843 | 0.762342 | 0.891793 | 0.878451 | Ager/Bcl10 |
| GO_BP_m4GO:005085antigen receptor 7/727       | 283/23843 | 0.763083 | 0.892442 | 0.87909  | Bcl10/Btn2 |
| GO_BP_m4GO:000991hormone transport 9/727      | 357/23843 | 0.763751 | 0.893004 | 0.879644 | C1qtnf12/F |
| GO_BP_m4GO:003530negative regulation 2/727    | 90/23843  | 0.764573 | 0.893529 | 0.880161 | Rbm26/Tsk  |
| GO_BP_m4GO:005079regulation 2/727             | 90/23843  | 0.764573 | 0.893529 | 0.880161 | Esr2/Hcrt1 |
| GO_BP_m4GO:000664membrane 4/727               | 170/23843 | 0.765196 | 0.893551 | 0.880183 | A4galt/B3c |
| GO_BP_m4GO:000961response to 4/727            | 170/23843 | 0.765196 | 0.893551 | 0.880183 | Lck/Mapk1  |
| GO_BP_m4GO:000271regulation 1/727             | 47/23843  | 0.767023 | 0.893551 | 0.880183 | Serpinb9   |
| GO_BP_m4GO:001657histone ubiquitination 1/727 | 47/23843  | 0.767023 | 0.893551 | 0.880183 | Trip12     |
| GO_BP_m4GO:002153neural tube 1/727            | 47/23843  | 0.767023 | 0.893551 | 0.880183 | Sox17      |
| GO_BP_m4GO:003233regulation 1/727             | 47/23843  | 0.767023 | 0.893551 | 0.880183 | Rela       |
| GO_BP_m4GO:004871regulation 1/727             | 47/23843  | 0.767023 | 0.893551 | 0.880183 | Dusp10     |
| GO_BP_m4GO:005105negative regulation 1/727    | 47/23843  | 0.767023 | 0.893551 | 0.880183 | Sik1       |
| GO_BP_m4GO:006076negative regulation 1/727    | 47/23843  | 0.767023 | 0.893551 | 0.880183 | Gas6       |
| GO_BP_m4GO:007026necrotic cell 1/727          | 47/23843  | 0.767023 | 0.893551 | 0.880183 | Ripk1      |
| GO_BP_m4GO:009858cellular response 1/727      | 47/23843  | 0.767023 | 0.893551 | 0.880183 | Mapk14     |
| GO_BP_m4GO:009960regulation 1/727             | 47/23843  | 0.767023 | 0.893551 | 0.880183 | Arc        |
| GO_BP_m4GO:190459positive regulation 1/727    | 47/23843  | 0.767023 | 0.893551 | 0.880183 | Mapk14     |
| GO_BP_m4GO:001619endosomal 4/727              | 171/23843 | 0.76915  | 0.895594 | 0.882195 | Bet1l/Ehd4 |
| GO_BP_m4GO:004259response to 4/727            | 171/23843 | 0.76915  | 0.895594 | 0.882195 | 5330417C2  |
| GO_BP_m4GO:007252pyridine-oxalate 2/727       | 91/23843  | 0.769896 | 0.896244 | 0.882835 | Acmsd/Kyr  |
| GO_BP_m4GO:000193endothelial 3/727            | 132/23843 | 0.770843 | 0.896909 | 0.883491 | Ager/Mydc  |
| GO_BP_m4GO:006104regulation 3/727             | 132/23843 | 0.770843 | 0.896909 | 0.883491 | Ager/Dusp  |
| GO_BP_m4GO:000276immune response 8/727        | 323/23843 | 0.771808 | 0.897813 | 0.884381 | Bcl10/Btn2 |
| GO_BP_m4GO:005134negative regulation 10/727   | 397/23843 | 0.772958 | 0.897905 | 0.884472 | Dpep1/Gas  |
| GO_BP_m4GO:000276negative regulation 1/727    | 48/23843  | 0.77414  | 0.897905 | 0.884472 | Thoc5      |
| GO_BP_m4GO:000701microtubule 1/727            | 48/23843  | 0.77414  | 0.897905 | 0.884472 | Nav3       |
| GO_BP_m4GO:000712synapsis 1/727               | 48/23843  | 0.77414  | 0.897905 | 0.884472 | Brip1      |
| GO_BP_m4GO:001059negative regulation 1/727    | 48/23843  | 0.77414  | 0.897905 | 0.884472 | Ager       |
| GO_BP_m4GO:001086positive regulation 1/727    | 48/23843  | 0.77414  | 0.897905 | 0.884472 | Inhba      |
| GO_BP_m4GO:002154cranial nerve 1/727          | 48/23843  | 0.77414  | 0.897905 | 0.884472 | Rpl24      |
| GO_BP_m4GO:003164regulation 1/727             | 48/23843  | 0.77414  | 0.897905 | 0.884472 | Nkx6-2     |
| GO_BP_m4GO:003265regulation 1/727             | 48/23843  | 0.77414  | 0.897905 | 0.884472 | Ager       |
| GO_BP_m4GO:004366regulation 1/727             | 48/23843  | 0.77414  | 0.897905 | 0.884472 | Ppp1r15b   |
| GO_BP_m4GO:004512regulation 1/727             | 48/23843  | 0.77414  | 0.897905 | 0.884472 | Car2       |
| GO_BP_m4GO:004866negative regulation 1/727    | 48/23843  | 0.77414  | 0.897905 | 0.884472 | Esr2       |
| GO_BP_m4GO:003133positive regulation 8/727    | 324/23843 | 0.774683 | 0.898074 | 0.884638 | 5330417C2  |
| GO_BP_m4GO:000704lysosomal transport 2/727    | 92/23843  | 0.775113 | 0.898074 | 0.884638 | Gak/Rilp   |
| GO_BP_m4GO:006002roof of mouth 2/727          | 92/23843  | 0.775113 | 0.898074 | 0.884638 | Anp32b/Inl |
| GO_BP_m4GO:000626DNA-dependent 3/727          | 133/23843 | 0.775225 | 0.898074 | 0.884638 | Cenps/Gmi  |
| GO_BP_m4GO:009028negative regulation 3/727    | 133/23843 | 0.775225 | 0.898074 | 0.884638 | Fam72a/Sp  |
| GO_BP_m4GO:006135neural precursor 4/727       | 173/23843 | 0.776903 | 0.89958  | 0.886122 | Ctnna1/Ga  |
| GO_BP_m4GO:005149positive regulation 5/727    | 212/23843 | 0.777845 | 0.89958  | 0.886122 | Grb2/Nav3  |
| GO_BP_m4GO:004247ear morphology 3/727         | 134/23843 | 0.779537 | 0.89958  | 0.886122 | Ror2/Spry2 |
| GO_BP_m4GO:003083positive regulation 2/727    | 93/23843  | 0.780227 | 0.89958  | 0.886122 | Grb2/Wipf  |

|                   |              |       |           |          |          |          |             |
|-------------------|--------------|-------|-----------|----------|----------|----------|-------------|
| GO_BP_m4GO:004864 | muscle org   | 2/727 | 93/23843  | 0.780227 | 0.89958  | 0.886122 | Dsp/Myom    |
| GO_BP_m4GO:190547 | positive re  | 2/727 | 93/23843  | 0.780227 | 0.89958  | 0.886122 | Erbp2/Mtcl  |
| GO_BP_m4GO:006144 | connective   | 6/727 | 251/23843 | 0.780609 | 0.89958  | 0.886122 | C3ar1/Fgf4  |
| GO_BP_m4GO:00351C | appendage    | 4/727 | 174/23843 | 0.780701 | 0.89958  | 0.886122 | Fgf4/Ror2/  |
| GO_BP_m4GO:00351C | limb morph   | 4/727 | 174/23843 | 0.780701 | 0.89958  | 0.886122 | Fgf4/Ror2/  |
| GO_BP_m4GO:00457C | positive re  | 4/727 | 174/23843 | 0.780701 | 0.89958  | 0.886122 | C3ar1/Lgal  |
| GO_BP_m4GO:00507C | regulation   | 4/727 | 174/23843 | 0.780701 | 0.89958  | 0.886122 | C1qtnf12/   |
| GO_BP_m4GO:00106C | regulation   | 1/727 | 49/23843  | 0.781041 | 0.89958  | 0.886122 | Fndc1       |
| GO_BP_m4GO:001587 | dopamine     | 1/727 | 49/23843  | 0.781041 | 0.89958  | 0.886122 | Rtn4        |
| GO_BP_m4GO:00301C | negative re  | 1/727 | 49/23843  | 0.781041 | 0.89958  | 0.886122 | F12         |
| GO_BP_m4GO:003021 | megakaryo    | 1/727 | 49/23843  | 0.781041 | 0.89958  | 0.886122 | Gata1       |
| GO_BP_m4GO:003101 | endocrine    | 1/727 | 49/23843  | 0.781041 | 0.89958  | 0.886122 | Nkx6-2      |
| GO_BP_m4GO:00323C | response tr  | 1/727 | 49/23843  | 0.781041 | 0.89958  | 0.886122 | Esr2        |
| GO_BP_m4GO:003294 | secretion b  | 1/727 | 49/23843  | 0.781041 | 0.89958  | 0.886122 | Vamp8       |
| GO_BP_m4GO:00329C | collagen bi  | 1/727 | 49/23843  | 0.781041 | 0.89958  | 0.886122 | Ager        |
| GO_BP_m4GO:004501 | actin nucle  | 1/727 | 49/23843  | 0.781041 | 0.89958  | 0.886122 | Wipf2       |
| GO_BP_m4GO:00458C | negative re  | 1/727 | 49/23843  | 0.781041 | 0.89958  | 0.886122 | Lgals3      |
| GO_BP_m4GO:190004 | negative re  | 1/727 | 49/23843  | 0.781041 | 0.89958  | 0.886122 | F12         |
| GO_BP_m4GO:19032C | negative re  | 1/727 | 49/23843  | 0.781041 | 0.89958  | 0.886122 | Nme5        |
| GO_BP_m4GO:19052C | negative re  | 1/727 | 49/23843  | 0.781041 | 0.89958  | 0.886122 | Trip12      |
| GO_BP_m4GO:00430C | regulation   | 7/727 | 289/23843 | 0.781411 | 0.89979  | 0.886329 | Arhgap23/   |
| GO_BP_m4GO:19028C | microtubul   | 3/727 | 135/23843 | 0.783782 | 0.902302 | 0.888803 | Aurka/Spdl  |
| GO_BP_m4GO:00090C | fatty acid c | 2/727 | 94/23843  | 0.785239 | 0.902876 | 0.889369 | Decr1/Irs2  |
| GO_BP_m4GO:001584 | monoamin     | 2/727 | 94/23843  | 0.785239 | 0.902876 | 0.889369 | Lgals3/Rtn  |
| GO_BP_m4GO:001701 | regulation   | 2/727 | 94/23843  | 0.785239 | 0.902876 | 0.889369 | Folr1/Vasn  |
| GO_BP_m4GO:00456C | negative re  | 2/727 | 94/23843  | 0.785239 | 0.902876 | 0.889369 | Thoc5/Zfp   |
| GO_BP_m4GO:20000C | positive re  | 2/727 | 94/23843  | 0.785239 | 0.902876 | 0.889369 | Aurka/Socs  |
| GO_BP_m4GO:00083C | RNA splicir  | 9/727 | 365/23843 | 0.785496 | 0.902876 | 0.889369 | Gemin5/Lg   |
| GO_BP_m4GO:00064C | 'de novo' p  | 1/727 | 50/23843  | 0.787731 | 0.902876 | 0.889369 | Dnajb14     |
| GO_BP_m4GO:000714 | male meiot   | 1/727 | 50/23843  | 0.787731 | 0.902876 | 0.889369 | Fanca       |
| GO_BP_m4GO:00099C | oocyte diff  | 1/727 | 50/23843  | 0.787731 | 0.902876 | 0.889369 | Aurka       |
| GO_BP_m4GO:00301C | water hom    | 1/727 | 50/23843  | 0.787731 | 0.902876 | 0.889369 | Gak         |
| GO_BP_m4GO:00351C | hindlimb r   | 1/727 | 50/23843  | 0.787731 | 0.902876 | 0.889369 | Fgf4        |
| GO_BP_m4GO:00353C | positive re  | 1/727 | 50/23843  | 0.787731 | 0.902876 | 0.889369 | Ppp1r15b    |
| GO_BP_m4GO:00354C | response tr  | 1/727 | 50/23843  | 0.787731 | 0.902876 | 0.889369 | F830016B0   |
| GO_BP_m4GO:004214 | cellular res | 1/727 | 50/23843  | 0.787731 | 0.902876 | 0.889369 | Tbl2        |
| GO_BP_m4GO:004394 | regulation   | 1/727 | 50/23843  | 0.787731 | 0.902876 | 0.889369 | Gpr61       |
| GO_BP_m4GO:19004C | negative re  | 1/727 | 50/23843  | 0.787731 | 0.902876 | 0.889369 | Nme5        |
| GO_BP_m4GO:00097C | post-embr    | 3/727 | 136/23843 | 0.787958 | 0.902876 | 0.889369 | Cyp1a2/Pl   |
| GO_BP_m4GO:001657 | histone me   | 3/727 | 136/23843 | 0.787958 | 0.902876 | 0.889369 | Dydc1/Prr   |
| GO_BP_m4GO:00342C | positive re  | 3/727 | 136/23843 | 0.787958 | 0.902876 | 0.889369 | Efna1/Eif3e |
| GO_BP_m4GO:00170C | protein im   | 5/727 | 215/23843 | 0.788057 | 0.902876 | 0.889369 | Agap3/Gas   |
| GO_BP_m4GO:004854 | response tr  | 6/727 | 254/23843 | 0.789981 | 0.903854 | 0.890332 | Esr2/Mir15  |
| GO_BP_m4GO:00356C | protein de   | 2/727 | 95/23843  | 0.790149 | 0.903854 | 0.890332 | Abhd13/Sf   |
| GO_BP_m4GO:00451C | meiotic chr  | 2/727 | 95/23843  | 0.790149 | 0.903854 | 0.890332 | Cenps/Brip  |
| GO_BP_m4GO:00610C | somite dev   | 2/727 | 95/23843  | 0.790149 | 0.903854 | 0.890332 | Ror2/Zeb2   |
| GO_BP_m4GO:004002 | regulation   | 7/727 | 292/23843 | 0.790172 | 0.903854 | 0.890332 | Dydc1/Mir   |
| GO_BP_m4GO:00516C | defense re   | 5/727 | 216/23843 | 0.791379 | 0.903854 | 0.890332 | A230050P2   |

|                                      |           |          |          |          |             |
|--------------------------------------|-----------|----------|----------|----------|-------------|
| GO_BP_m4GO:19029C negative re3/727   | 137/23843 | 0.792068 | 0.903854 | 0.890332 | Nav3/Spta   |
| GO_BP_m4GO:00516E establishm10/727   | 405/23843 | 0.793172 | 0.903854 | 0.890332 | Cdh3/Il13/  |
| GO_BP_m4GO:00018E retina hom1/727    | 51/23843  | 0.794217 | 0.903854 | 0.890332 | Cdh3        |
| GO_BP_m4GO:000752 neuromusc1/727     | 51/23843  | 0.794217 | 0.903854 | 0.890332 | Erbp2       |
| GO_BP_m4GO:00106E regulation 1/727   | 51/23843  | 0.794217 | 0.903854 | 0.890332 | Fndc1       |
| GO_BP_m4GO:001082 negative re1/727   | 51/23843  | 0.794217 | 0.903854 | 0.890332 | Pid1        |
| GO_BP_m4GO:003261 interleukin1/727   | 51/23843  | 0.794217 | 0.903854 | 0.890332 | Ager        |
| GO_BP_m4GO:003272 negative re1/727   | 51/23843  | 0.794217 | 0.903854 | 0.890332 | Gas6        |
| GO_BP_m4GO:00350E establishm1/727    | 51/23843  | 0.794217 | 0.903854 | 0.890332 | Mtcl1       |
| GO_BP_m4GO:004573 positive re1/727   | 51/23843  | 0.794217 | 0.903854 | 0.890332 | Rps3        |
| GO_BP_m4GO:004824 lymphocyte1/727    | 51/23843  | 0.794217 | 0.903854 | 0.890332 | Gas6        |
| GO_BP_m4GO:005081 negative re1/727   | 51/23843  | 0.794217 | 0.903854 | 0.890332 | F12         |
| GO_BP_m4GO:00512E protein het1/727   | 51/23843  | 0.794217 | 0.903854 | 0.890332 | Rrm1        |
| GO_BP_m4GO:00515E histone H3 1/727   | 51/23843  | 0.794217 | 0.903854 | 0.890332 | Dydc1       |
| GO_BP_m4GO:006124 establishm1/727    | 51/23843  | 0.794217 | 0.903854 | 0.890332 | Mtcl1       |
| GO_BP_m4GO:007171icosanoid t1/727    | 51/23843  | 0.794217 | 0.903854 | 0.890332 | Abcc4       |
| GO_BP_m4GO:190157 fatty acid d1/727  | 51/23843  | 0.794217 | 0.903854 | 0.890332 | Abcc4       |
| GO_BP_m4GO:001052 regulation 2/727   | 96/23843  | 0.794961 | 0.903854 | 0.890332 | Il13/Slc8a1 |
| GO_BP_m4GO:001921 regulation 2/727   | 96/23843  | 0.794961 | 0.903854 | 0.890332 | Apoa4/Vdr   |
| GO_BP_m4GO:00300E contractile 2/727  | 96/23843  | 0.794961 | 0.903854 | 0.890332 | Eln/Synpo   |
| GO_BP_m4GO:00421C positive re2/727   | 96/23843  | 0.794961 | 0.903854 | 0.890332 | Ager/Rps3   |
| GO_BP_m4GO:004314 stress fiber 2/727 | 96/23843  | 0.794961 | 0.903854 | 0.890332 | Eln/Synpo   |
| GO_BP_m4GO:00902E positive re2/727   | 96/23843  | 0.794961 | 0.903854 | 0.890332 | Ror2/Zbed   |
| GO_BP_m4GO:009873 macromole2/727     | 96/23843  | 0.794961 | 0.903854 | 0.890332 | Abhd13/Sf   |
| GO_BP_m4GO:01400E mitochond 2/727    | 96/23843  | 0.794961 | 0.903854 | 0.890332 | Ears2/Mrps  |
| GO_BP_m4GO:190384 regulation 2/727   | 96/23843  | 0.794961 | 0.903854 | 0.890332 | Folr1/Vasn  |
| GO_BP_m4GO:00018E tissue hom5/727    | 218/23843 | 0.797901 | 0.906981 | 0.893412 | Car2/Cdh3   |
| GO_BP_m4GO:00309C forebrain d9/727   | 370/23843 | 0.798327 | 0.90725  | 0.893677 | Duox2/Fez   |
| GO_BP_m4GO:00313E regulation 4/727   | 179/23843 | 0.798928 | 0.907353 | 0.893778 | Bcl10/Rps2  |
| GO_BP_m4GO:00063E DNA-temp2/727      | 97/23843  | 0.799675 | 0.907353 | 0.893778 | Polr1e/Smc  |
| GO_BP_m4GO:190307 regulation 2/727   | 97/23843  | 0.799675 | 0.907353 | 0.893778 | Pid1/Vamp   |
| GO_BP_m4GO:00308C positive re1/727   | 52/23843  | 0.800505 | 0.907353 | 0.893778 | Tshr        |
| GO_BP_m4GO:00308E prostate gl1/727   | 52/23843  | 0.800505 | 0.907353 | 0.893778 | Esr2        |
| GO_BP_m4GO:00455E negative re1/727   | 52/23843  | 0.800505 | 0.907353 | 0.893778 | Ddit3       |
| GO_BP_m4GO:004593 positive re1/727   | 52/23843  | 0.800505 | 0.907353 | 0.893778 | Lck         |
| GO_BP_m4GO:007093 protein K41/727    | 52/23843  | 0.800505 | 0.907353 | 0.893778 | Nedd4l      |
| GO_BP_m4GO:19023E negative re1/727   | 52/23843  | 0.800505 | 0.907353 | 0.893778 | Nbas        |
| GO_BP_m4GO:19035E negative re1/727   | 52/23843  | 0.800505 | 0.907353 | 0.893778 | Gas6        |
| GO_BP_m4GO:19052C regulation 1/727   | 52/23843  | 0.800505 | 0.907353 | 0.893778 | Sox17       |
| GO_BP_m4GO:001094 negative re5/727   | 219/23843 | 0.801101 | 0.907813 | 0.894232 | Btn2a2/Hu   |
| GO_BP_m4GO:00329E regulation 8/727   | 334/23843 | 0.801992 | 0.908608 | 0.895014 | Arhgap18/   |
| GO_BP_m4GO:000691 autophagy 9/727    | 372/23843 | 0.803298 | 0.90909  | 0.895489 | 5330417C2   |
| GO_BP_m4GO:006191 process uti 9/727  | 372/23843 | 0.803298 | 0.90909  | 0.895489 | 5330417C2   |
| GO_BP_m4GO:000662 protein tar3/727   | 140/23843 | 0.804    | 0.90909  | 0.895489 | Plagl2/Tor  |
| GO_BP_m4GO:001821 peptidyl-tr 3/727  | 140/23843 | 0.804    | 0.90909  | 0.895489 | Camk1g/D    |
| GO_BP_m4GO:003027 regulation 5/727   | 220/23843 | 0.804261 | 0.90909  | 0.895489 | Gata1/Ma    |
| GO_BP_m4GO:00301C natural kill2/727  | 98/23843  | 0.804292 | 0.90909  | 0.895489 | Gas6/lfna1  |
| GO_BP_m4GO:004642 positive re2/727   | 98/23843  | 0.804292 | 0.90909  | 0.895489 | Il13/Lck    |



|                   |                       |       |           |          |          |          |             |
|-------------------|-----------------------|-------|-----------|----------|----------|----------|-------------|
| GO_BP_m4GO:009956 | chemical syn          | 2/727 | 98/23843  | 0.804292 | 0.90909  | 0.895489 | Grm1/Hcrt   |
| GO_BP_m4GO:000254 | monocyte              | 1/727 | 53/23843  | 0.806601 | 0.90909  | 0.895489 | Lgals3      |
| GO_BP_m4GO:000687 | cellular iron         | 1/727 | 53/23843  | 0.806601 | 0.90909  | 0.895489 | Heph        |
| GO_BP_m4GO:001065 | cardiac muscle        | 1/727 | 53/23843  | 0.806601 | 0.90909  | 0.895489 | Fndc1       |
| GO_BP_m4GO:001590 | long-chain            | 1/727 | 53/23843  | 0.806601 | 0.90909  | 0.895489 | Irs2        |
| GO_BP_m4GO:004438 | protein localization  | 1/727 | 53/23843  | 0.806601 | 0.90909  | 0.895489 | Aurka       |
| GO_BP_m4GO:004658 | negative regulation   | 1/727 | 53/23843  | 0.806601 | 0.90909  | 0.895489 | Spry2       |
| GO_BP_m4GO:005193 | synaptic transmission | 1/727 | 53/23843  | 0.806601 | 0.90909  | 0.895489 | Car2        |
| GO_BP_m4GO:005501 | ventricular           | 1/727 | 53/23843  | 0.806601 | 0.90909  | 0.895489 | Dsp         |
| GO_BP_m4GO:007098 | demethylation         | 1/727 | 53/23843  | 0.806601 | 0.90909  | 0.895489 | Cyp1a2      |
| GO_BP_m4GO:009030 | positive regulation   | 1/727 | 53/23843  | 0.806601 | 0.90909  | 0.895489 | F12         |
| GO_BP_m4GO:190054 | negative regulation   | 1/727 | 53/23843  | 0.806601 | 0.90909  | 0.895489 | Pid1        |
| GO_BP_m4GO:190275 | negative regulation   | 1/727 | 53/23843  | 0.806601 | 0.90909  | 0.895489 | Hus1        |
| GO_BP_m4GO:190288 | negative regulation   | 1/727 | 53/23843  | 0.806601 | 0.90909  | 0.895489 | Nme5        |
| GO_BP_m4GO:190339 | regulation            | 1/727 | 53/23843  | 0.806601 | 0.90909  | 0.895489 | Ptpn23      |
| GO_BP_m4GO:004428 | small molecule        | 7/727 | 298/23843 | 0.806897 | 0.909209 | 0.895607 | Akr1d1/Cy1  |
| GO_BP_m4GO:009900 | vesicle-mediated      | 3/727 | 141/23843 | 0.807847 | 0.909714 | 0.896104 | Rims4/Sna1  |
| GO_BP_m4GO:000206 | chondrocyte           | 2/727 | 99/23843  | 0.808814 | 0.909714 | 0.896104 | Mapk14/Ret  |
| GO_BP_m4GO:002151 | spinal cord           | 2/727 | 99/23843  | 0.808814 | 0.909714 | 0.896104 | Nkx6-2/Vsr  |
| GO_BP_m4GO:190180 | positive regulation   | 2/727 | 99/23843  | 0.808814 | 0.909714 | 0.896104 | Aurka/Socs  |
| GO_BP_m4GO:003526 | organ growth          | 4/727 | 182/23843 | 0.809265 | 0.909714 | 0.896104 | Mapk14/M    |
| GO_BP_m4GO:004639 | carboxylic acid       | 8/727 | 337/23843 | 0.80968  | 0.909714 | 0.896104 | Acmsd/Akr   |
| GO_BP_m4GO:000237 | immunoglobulin        | 5/727 | 222/23843 | 0.810462 | 0.909714 | 0.896104 | Igkv16-104  |
| GO_BP_m4GO:009025 | regulation            | 5/727 | 222/23843 | 0.810462 | 0.909714 | 0.896104 | Dsp/Gtf2irc |
| GO_BP_m4GO:004316 | proteasome            | 9/727 | 375/23843 | 0.810581 | 0.909714 | 0.896104 | Agap3/Aur   |
| GO_BP_m4GO:007252 | pyridine-carboxylate  | 3/727 | 142/23843 | 0.811631 | 0.909714 | 0.896104 | Acmsd/Kyr   |
| GO_BP_m4GO:001605 | organic acid          | 8/727 | 338/23843 | 0.812192 | 0.909714 | 0.896104 | Acmsd/Akr   |
| GO_BP_m4GO:000706 | sister chromatid      | 1/727 | 54/23843  | 0.812511 | 0.909714 | 0.896104 | Sfpq        |
| GO_BP_m4GO:000758 | respiratory           | 1/727 | 54/23843  | 0.812511 | 0.909714 | 0.896104 | Traf4       |
| GO_BP_m4GO:000759 | excretion             | 1/727 | 54/23843  | 0.812511 | 0.909714 | 0.896104 | Grhpr       |
| GO_BP_m4GO:000833 | endosome              | 1/727 | 54/23843  | 0.812511 | 0.909714 | 0.896104 | Rilp        |
| GO_BP_m4GO:001052 | positive regulation   | 1/727 | 54/23843  | 0.812511 | 0.909714 | 0.896104 | Il13        |
| GO_BP_m4GO:002179 | cerebral cortex       | 1/727 | 54/23843  | 0.812511 | 0.909714 | 0.896104 | Rtn4        |
| GO_BP_m4GO:003049 | maturation            | 1/727 | 54/23843  | 0.812511 | 0.909714 | 0.896104 | Krr1        |
| GO_BP_m4GO:003501 | somatic stem cell     | 1/727 | 54/23843  | 0.812511 | 0.909714 | 0.896104 | Ldb2        |
| GO_BP_m4GO:004406 | regulation            | 1/727 | 54/23843  | 0.812511 | 0.909714 | 0.896104 | Inhba       |
| GO_BP_m4GO:004598 | negative regulation   | 1/727 | 54/23843  | 0.812511 | 0.909714 | 0.896104 | Pid1        |
| GO_BP_m4GO:006019 | positive regulation   | 1/727 | 54/23843  | 0.812511 | 0.909714 | 0.896104 | Apoa4       |
| GO_BP_m4GO:005086 | negative regulation   | 4/727 | 183/23843 | 0.812613 | 0.909714 | 0.896104 | Btn2a2/Erb  |
| GO_BP_m4GO:006201 | positive regulation   | 4/727 | 183/23843 | 0.812613 | 0.909714 | 0.896104 | Apoa4/Irs2  |
| GO_BP_m4GO:000940 | response to           | 2/727 | 100/23843 | 0.813244 | 0.909714 | 0.896104 | Hsbp1l1/Tr  |
| GO_BP_m4GO:003139 | positive regulation   | 2/727 | 100/23843 | 0.813244 | 0.909714 | 0.896104 | Bcl10/Rps2  |
| GO_BP_m4GO:003162 | receptor in           | 2/727 | 100/23843 | 0.813244 | 0.909714 | 0.896104 | Grb2/Rab3   |
| GO_BP_m4GO:003209 | positive regulation   | 2/727 | 100/23843 | 0.813244 | 0.909714 | 0.896104 | Tiam1/Traf  |
| GO_BP_m4GO:004346 | regulation            | 2/727 | 100/23843 | 0.813244 | 0.909714 | 0.896104 | Irs2/Nkx1-  |
| GO_BP_m4GO:005198 | regulation            | 2/727 | 100/23843 | 0.813244 | 0.909714 | 0.896104 | Rmi2/Sfpq   |
| GO_BP_m4GO:190489 | positive regulation   | 2/727 | 100/23843 | 0.813244 | 0.909714 | 0.896104 | Il13/Lck    |
| GO_BP_m4GO:200005 | regulation            | 3/727 | 143/23843 | 0.815351 | 0.911858 | 0.898216 | Aurka/Pdcl  |

|                                    |           |          |          |          |              |
|------------------------------------|-----------|----------|----------|----------|--------------|
| GO_BP_m4GO:005121cartilage de4/727 | 184/23843 | 0.815912 | 0.912273 | 0.898624 | Fgf4/Mapk    |
| GO_BP_m4GO:000683mitochondr6/727   | 263/23843 | 0.816262 | 0.91245  | 0.8988   | Plagl2/Slc2  |
| GO_BP_m4GO:190382positive reg8/727 | 340/23843 | 0.81714  | 0.913218 | 0.899556 | Erbp2/Gasf   |
| GO_BP_m4GO:003153actin cytosl2/727 | 101/23843 | 0.817581 | 0.913284 | 0.899621 | Parvg/Spta   |
| GO_BP_m4GO:005195regulation 2/727  | 101/23843 | 0.817581 | 0.913284 | 0.899621 | Htr2c/Rtn4   |
| GO_BP_m4GO:000672terpenoid r1/727  | 55/23843  | 0.818241 | 0.913381 | 0.899716 | Cyp1a2       |
| GO_BP_m4GO:001065striated mu1/727  | 55/23843  | 0.818241 | 0.913381 | 0.899716 | Fndc1        |
| GO_BP_m4GO:003527exocrine sy1/727  | 55/23843  | 0.818241 | 0.913381 | 0.899716 | Polb         |
| GO_BP_m4GO:000989negative re6/727  | 264/23843 | 0.819016 | 0.913558 | 0.899891 | Efna1/Nba    |
| GO_BP_m4GO:000228lymphocyte4/727   | 185/23843 | 0.819164 | 0.913558 | 0.899891 | Ifna12/Il27, |
| GO_BP_m4GO:004218cellular ket4/727 | 185/23843 | 0.819164 | 0.913558 | 0.899891 | Apoa4/Coc    |
| GO_BP_m4GO:007156cellular res4/727 | 185/23843 | 0.819164 | 0.913558 | 0.899891 | Folr1/Mir1!  |
| GO_BP_m4GO:003355unsaturate2/727   | 102/23843 | 0.821828 | 0.916064 | 0.902359 | Ces2h/Cyp    |
| GO_BP_m4GO:190300organelle c2/727  | 102/23843 | 0.821828 | 0.916064 | 0.902359 | Fundc2/To    |
| GO_BP_m4GO:000152angiogene12/727   | 492/23843 | 0.8222   | 0.916064 | 0.902359 | Angptl6/C3   |
| GO_BP_m4GO:003297regulation 9/727  | 380/23843 | 0.822266 | 0.916064 | 0.902359 | Arhgap18/    |
| GO_BP_m4GO:005070regulation 4/727  | 186/23843 | 0.822369 | 0.916064 | 0.902359 | Btn2a2/Ga    |
| GO_BP_m4GO:001059regulation 3/727  | 145/23843 | 0.822605 | 0.916113 | 0.902408 | Ager/Efna1   |
| GO_BP_m4GO:001081negative re1/727  | 56/23843  | 0.823796 | 0.916585 | 0.902873 | Muc4         |
| GO_BP_m4GO:001491positive reg1/727 | 56/23843  | 0.823796 | 0.916585 | 0.902873 | Ager         |
| GO_BP_m4GO:001644somatic rec1/727  | 56/23843  | 0.823796 | 0.916585 | 0.902873 | Polb         |
| GO_BP_m4GO:004512cellular ext1/727 | 56/23843  | 0.823796 | 0.916585 | 0.902873 | Sell         |
| GO_BP_m4GO:007099neuron de9/727    | 381/23843 | 0.824536 | 0.917195 | 0.903473 | Ager/Akt1s   |
| GO_BP_m4GO:000020protein pol4/727  | 187/23843 | 0.825526 | 0.917657 | 0.903928 | Anapc2/Ne    |
| GO_BP_m4GO:000320cardiac che4/727  | 187/23843 | 0.825526 | 0.917657 | 0.903928 | Dsp/Fhl2/N   |
| GO_BP_m4GO:007155response tr4/727  | 187/23843 | 0.825526 | 0.917657 | 0.903928 | Folr1/Mir1!  |
| GO_BP_m4GO:004350muscle ad2/727    | 103/23843 | 0.825986 | 0.917912 | 0.904179 | Gtf2ird1/N   |
| GO_BP_m4GO:005149negative re3/727  | 146/23843 | 0.82614  | 0.917912 | 0.904179 | Nav3/Sptar   |
| GO_BP_m4GO:190121regulation 8/727  | 344/23843 | 0.826734 | 0.918303 | 0.904565 | Ager/Akt1s   |
| GO_BP_m4GO:003156cell-substr7/727  | 306/23843 | 0.827581 | 0.918303 | 0.904565 | Efna1/Gasf   |
| GO_BP_m4GO:004648glycerolipic7/727 | 306/23843 | 0.827581 | 0.918303 | 0.904565 | Apoa4/Gdq    |
| GO_BP_m4GO:004887homeostas7/727    | 306/23843 | 0.827581 | 0.918303 | 0.904565 | Bcl10/Gata   |
| GO_BP_m4GO:000164osteoblast 4/727  | 188/23843 | 0.828637 | 0.918303 | 0.904565 | Fhl2/Nfatc3  |
| GO_BP_m4GO:004643organophc4/727    | 188/23843 | 0.828637 | 0.918303 | 0.904565 | Gdpd3/Lipi   |
| GO_BP_m4GO:007124cellular res4/727 | 188/23843 | 0.828637 | 0.918303 | 0.904565 | Cyp1a2/Mi    |
| GO_BP_m4GO:000658catecholam1/727   | 57/23843  | 0.829181 | 0.918303 | 0.904565 | Htr2c        |
| GO_BP_m4GO:000971catechol-c1/727   | 57/23843  | 0.829181 | 0.918303 | 0.904565 | Htr2c        |
| GO_BP_m4GO:001908viral gene 1/727  | 57/23843  | 0.829181 | 0.918303 | 0.904565 | Eif3a        |
| GO_BP_m4GO:004346regulation 1/727  | 57/23843  | 0.829181 | 0.918303 | 0.904565 | Dynll2       |
| GO_BP_m4GO:004851circadian b1/727  | 57/23843  | 0.829181 | 0.918303 | 0.904565 | Hctr1        |
| GO_BP_m4GO:005131metaphase1/727    | 57/23843  | 0.829181 | 0.918303 | 0.904565 | Spdl1        |
| GO_BP_m4GO:006011inner ear r1/727  | 57/23843  | 0.829181 | 0.918303 | 0.904565 | Tshr         |
| GO_BP_m4GO:000803cell recogn6/727  | 268/23843 | 0.829706 | 0.918634 | 0.904891 | Astl/Cadm1   |
| GO_BP_m4GO:001973antimicrob 2/727  | 104/23843 | 0.830056 | 0.918634 | 0.904891 | AY761184/    |
| GO_BP_m4GO:003528segmentati2/727   | 104/23843 | 0.830056 | 0.918634 | 0.904891 | Ror2/Zeb2    |
| GO_BP_m4GO:000975hormone-r4/727    | 189/23843 | 0.831702 | 0.920242 | 0.906475 | Esr2/Tshr/L  |
| GO_BP_m4GO:005090detection c7/727  | 308/23843 | 0.832471 | 0.920248 | 0.906481 | Gnat1/Olfr   |
| GO_BP_m4GO:003496histone lysi2/727 | 105/23843 | 0.834041 | 0.920248 | 0.906481 | Dydc1/Smy    |

|                                     |           |          |          |          |             |
|-------------------------------------|-----------|----------|----------|----------|-------------|
| GO_BP_m4GO:006101regulation 2/727   | 105/23843 | 0.834041 | 0.920248 | 0.906481 | Nbas/Zfp3   |
| GO_BP_m4GO:00719C negative re2/727  | 105/23843 | 0.834041 | 0.920248 | 0.906481 | Dusp10/Sp   |
| GO_BP_m4GO:00901C negative re2/727  | 105/23843 | 0.834041 | 0.920248 | 0.906481 | Fst/Vasn    |
| GO_BP_m4GO:190437regulation 2/727   | 105/23843 | 0.834041 | 0.920248 | 0.906481 | Pid1/Vamp   |
| GO_BP_m4GO:00071E heterophili1/727  | 58/23843  | 0.834402 | 0.920248 | 0.906481 | Cadm2       |
| GO_BP_m4GO:00320C negative re1/727  | 58/23843  | 0.834402 | 0.920248 | 0.906481 | Akt1s1      |
| GO_BP_m4GO:00322E positive re1/727  | 58/23843  | 0.834402 | 0.920248 | 0.906481 | Synpo       |
| GO_BP_m4GO:004277mitochond1/727     | 58/23843  | 0.834402 | 0.920248 | 0.906481 | Cyca        |
| GO_BP_m4GO:00466E positive re1/727  | 58/23843  | 0.834402 | 0.920248 | 0.906481 | Socs5       |
| GO_BP_m4GO:00468E regulation 1/727  | 58/23843  | 0.834402 | 0.920248 | 0.906481 | Car2        |
| GO_BP_m4GO:00504E regulation 1/727  | 58/23843  | 0.834402 | 0.920248 | 0.906481 | Rtn4        |
| GO_BP_m4GO:006044mammary 1/727      | 58/23843  | 0.834402 | 0.920248 | 0.906481 | Vdr         |
| GO_BP_m4GO:00069E regulation 3/727  | 149/23843 | 0.836385 | 0.922223 | 0.908426 | Dsp/Lck/Sli |
| GO_BP_m4GO:00509C leukocyte r7/727  | 310/23843 | 0.837251 | 0.922815 | 0.909009 | C3ar1/Gasf  |
| GO_BP_m4GO:000751skeletal m4/727    | 191/23843 | 0.837694 | 0.922815 | 0.909009 | Cops2/Eln/  |
| GO_BP_m4GO:00315C protein-co 4/727  | 191/23843 | 0.837694 | 0.922815 | 0.909009 | Snap47/Srs  |
| GO_BP_m4GO:190401positive re4/727   | 191/23843 | 0.837694 | 0.922815 | 0.909009 | C3ar1/Lgal  |
| GO_BP_m4GO:00076E rhythmic b1/727   | 59/23843  | 0.839464 | 0.923303 | 0.90949  | Hctr1       |
| GO_BP_m4GO:00193E arachidonic1/727  | 59/23843  | 0.839464 | 0.923303 | 0.90949  | Cyp2a22     |
| GO_BP_m4GO:003051negative re1/727   | 59/23843  | 0.839464 | 0.923303 | 0.90949  | Vasn        |
| GO_BP_m4GO:00460E cGMP met:1/727    | 59/23843  | 0.839464 | 0.923303 | 0.90949  | Htr2c       |
| GO_BP_m4GO:00609E endocrine 1/727   | 59/23843  | 0.839464 | 0.923303 | 0.90949  | Inhba       |
| GO_BP_m4GO:00711E regulation 1/727  | 59/23843  | 0.839464 | 0.923303 | 0.90949  | Pidd1       |
| GO_BP_m4GO:00321C negative re7/727  | 311/23843 | 0.8396   | 0.923303 | 0.90949  | Ager/Dusp   |
| GO_BP_m4GO:00027C regulation 3/727  | 150/23843 | 0.839683 | 0.923303 | 0.90949  | Ager/Muc4   |
| GO_BP_m4GO:000724I-kappaB k4/727    | 192/23843 | 0.840623 | 0.924125 | 0.910299 | Bcl10/Rela/ |
| GO_BP_m4GO:00512E spindle ass2/727  | 107/23843 | 0.841758 | 0.925127 | 0.911286 | Aurka/RpsE  |
| GO_BP_m4GO:003134positive re7/727   | 312/23843 | 0.841921 | 0.925127 | 0.911286 | Ager/F12/F  |
| GO_BP_m4GO:19030E regulation 4/727  | 193/23843 | 0.843507 | 0.926656 | 0.912793 | Aurka/Efna  |
| GO_BP_m4GO:000704lysosome c1/727    | 60/23843  | 0.844371 | 0.926753 | 0.912888 | Tpcn2       |
| GO_BP_m4GO:002151cell differer1/727 | 60/23843  | 0.844371 | 0.926753 | 0.912888 | Nkx6-2      |
| GO_BP_m4GO:00550E anion hom 1/727   | 60/23843  | 0.844371 | 0.926753 | 0.912888 | Kctd7       |
| GO_BP_m4GO:008017lytic vacuol1/727  | 60/23843  | 0.844371 | 0.926753 | 0.912888 | Tpcn2       |
| GO_BP_m4GO:000634chromatin 2/727    | 108/23843 | 0.845493 | 0.927772 | 0.913892 | Dydc1/Smc   |
| GO_BP_m4GO:00432E regulation 10/727 | 429/23843 | 0.845871 | 0.927974 | 0.914091 | Arhgap18/   |
| GO_BP_m4GO:00092E cellular res3/727 | 152/23843 | 0.846106 | 0.928018 | 0.914135 | 5330417C2   |
| GO_BP_m4GO:00032E ventricular 1/727 | 61/23843  | 0.849128 | 0.928891 | 0.914994 | Dsp         |
| GO_BP_m4GO:00106E positive re1/727  | 61/23843  | 0.849128 | 0.928891 | 0.914994 | Irs2        |
| GO_BP_m4GO:001644somatic div1/727   | 61/23843  | 0.849128 | 0.928891 | 0.914994 | Polb        |
| GO_BP_m4GO:00439E histone H3 1/727  | 61/23843  | 0.849128 | 0.928891 | 0.914994 | Dr1         |
| GO_BP_m4GO:00504E catecholam1/727   | 61/23843  | 0.849128 | 0.928891 | 0.914994 | Rtn4        |
| GO_BP_m4GO:00603E regulation 1/727  | 61/23843  | 0.849128 | 0.928891 | 0.914994 | Inhba       |
| GO_BP_m4GO:190384negative re1/727   | 61/23843  | 0.849128 | 0.928891 | 0.914994 | Vasn        |
| GO_BP_m4GO:00064E protein gly4/727  | 195/23843 | 0.849144 | 0.928891 | 0.914994 | B3gnt5/Fut  |
| GO_BP_m4GO:00068E receptor-n4/727   | 195/23843 | 0.849144 | 0.928891 | 0.914994 | Gak/Grb2/I  |
| GO_BP_m4GO:004341macromole4/727     | 195/23843 | 0.849144 | 0.928891 | 0.914994 | B3gnt5/Fut  |
| GO_BP_m4GO:19016C alpha-amir4/727   | 195/23843 | 0.849144 | 0.928891 | 0.914994 | Bhmt/Dpep   |
| GO_BP_m4GO:00067E oxidoreduc3/727   | 153/23843 | 0.849233 | 0.928891 | 0.914994 | Coq6/Kynu   |

|                                                        |           |          |          |          |             |
|--------------------------------------------------------|-----------|----------|----------|----------|-------------|
| GO_BP_m4GO:007235monocarbonyl                          | 236/23843 | 0.84958  | 0.929058 | 0.915159 | Akr1d1/Ap   |
| GO_BP_m4GO:004566positive regulation of                | 432/23843 | 0.851652 | 0.930627 | 0.916705 | Anapc2/Fe   |
| GO_BP_m4GO:000176morphogenesis of                      | 237/23843 | 0.852099 | 0.930627 | 0.916705 | Grb2/Nfatc  |
| GO_BP_m4GO:003051intracellular transport               | 110/23843 | 0.852724 | 0.930627 | 0.916705 | Esr2/Ube2i  |
| GO_BP_m4GO:000076syncytium formation                   | 62/23843  | 0.85374  | 0.930627 | 0.916705 | Mapk14      |
| GO_BP_m4GO:000183release of calcium                    | 62/23843  | 0.85374  | 0.930627 | 0.916705 | Wdr35       |
| GO_BP_m4GO:000340neural retina morphogenesis           | 62/23843  | 0.85374  | 0.930627 | 0.916705 | Cabp4       |
| GO_BP_m4GO:004277ATP synthesis                         | 62/23843  | 0.85374  | 0.930627 | 0.916705 | Cyca        |
| GO_BP_m4GO:004514homologous recombination              | 62/23843  | 0.85374  | 0.930627 | 0.916705 | Brip1       |
| GO_BP_m4GO:004542regulation of cell growth             | 62/23843  | 0.85374  | 0.930627 | 0.916705 | Wdr35       |
| GO_BP_m4GO:006004retina morphogenesis                  | 62/23843  | 0.85374  | 0.930627 | 0.916705 | Cabp4       |
| GO_BP_m4GO:006103regulation of cell cycle              | 62/23843  | 0.85374  | 0.930627 | 0.916705 | Rela        |
| GO_BP_m4GO:190126carbohydrate metabolic process        | 62/23843  | 0.85374  | 0.930627 | 0.916705 | Vamp8       |
| GO_BP_m4GO:200017positive regulation of cell cycle     | 62/23843  | 0.85374  | 0.930627 | 0.916705 | Gak         |
| GO_BP_m4GO:200024negative regulation of cell cycle     | 62/23843  | 0.85374  | 0.930627 | 0.916705 | Astl        |
| GO_BP_m4GO:000657cellular morphogenesis                | 155/23843 | 0.855322 | 0.932022 | 0.918079 | Duox2/Folr  |
| GO_BP_m4GO:003134positive regulation of cell cycle     | 434/23843 | 0.85541  | 0.932022 | 0.918079 | Anapc2/Its  |
| GO_BP_m4GO:003003lamellipodium formation               | 63/23843  | 0.858211 | 0.934436 | 0.920456 | Spata13     |
| GO_BP_m4GO:003460cellular respiration                  | 63/23843  | 0.858211 | 0.934436 | 0.920456 | Hsbp1l1     |
| GO_BP_m4GO:190160alpha-amino acid metabolism           | 63/23843  | 0.858211 | 0.934436 | 0.920456 | Bhmt        |
| GO_BP_m4GO:000669icosanoid metabolism                  | 112/23843 | 0.859645 | 0.935001 | 0.921013 | Ces2h/Cyp   |
| GO_BP_m4GO:004581negative regulation of cell cycle     | 112/23843 | 0.859645 | 0.935001 | 0.921013 | Dydc1/Smc   |
| GO_BP_m4GO:190305positive regulation of cell cycle     | 112/23843 | 0.859645 | 0.935001 | 0.921013 | Aurka/Socs  |
| GO_BP_m4GO:004873appendage morphogenesis               | 199/23843 | 0.859904 | 0.935001 | 0.921013 | Fgf4/Ror2/  |
| GO_BP_m4GO:006017limb development                      | 199/23843 | 0.859904 | 0.935001 | 0.921013 | Fgf4/Ror2/  |
| GO_BP_m4GO:200002regulation of cell cycle              | 199/23843 | 0.859904 | 0.935001 | 0.921013 | Pim1/Ror2/  |
| GO_BP_m4GO:000756female pregnancy                      | 157/23843 | 0.861194 | 0.935534 | 0.921538 | Mirlet7c-2/ |
| GO_BP_m4GO:004340steroid hormone synthesis             | 157/23843 | 0.861194 | 0.935534 | 0.921538 | Esr2/Ube2i  |
| GO_BP_m4GO:006053skeletal muscle fiber development     | 200/23843 | 0.862489 | 0.935534 | 0.921538 | Cops2/Eln/  |
| GO_BP_m4GO:007237protein activation                    | 200/23843 | 0.862489 | 0.935534 | 0.921538 | F12/Ighv9-  |
| GO_BP_m4GO:000694syncytium formation                   | 64/23843  | 0.862546 | 0.935534 | 0.921538 | Mapk14      |
| GO_BP_m4GO:000906glutamine synthesis                   | 64/23843  | 0.862546 | 0.935534 | 0.921538 | Fah         |
| GO_BP_m4GO:002176hippocampus morphogenesis             | 64/23843  | 0.862546 | 0.935534 | 0.921538 | Zeb2        |
| GO_BP_m4GO:003237positive regulation of cell cycle     | 64/23843  | 0.862546 | 0.935534 | 0.921538 | Abcb4       |
| GO_BP_m4GO:004333response to hypoxia                   | 64/23843  | 0.862546 | 0.935534 | 0.921538 | Ifna12      |
| GO_BP_m4GO:006038pathway-receptor signaling            | 64/23843  | 0.862546 | 0.935534 | 0.921538 | Inhba       |
| GO_BP_m4GO:006042lung morphogenesis                    | 64/23843  | 0.862546 | 0.935534 | 0.921538 | Spry2       |
| GO_BP_m4GO:003110microtubule cytoskeleton organization | 113/23843 | 0.862993 | 0.935807 | 0.921806 | Nav3/Rps3   |
| GO_BP_m4GO:000926response to hypoxia                   | 158/23843 | 0.864051 | 0.936529 | 0.922518 | Hsbp1l1/Lx  |
| GO_BP_m4GO:005110negative regulation of cell cycle     | 158/23843 | 0.864051 | 0.936529 | 0.922518 | Aurka/Ddit  |
| GO_BP_m4GO:000150ossification                          | 362/23843 | 0.865135 | 0.937444 | 0.92342  | Duox2/Fhl2  |
| GO_BP_m4GO:005115regulation of cell cycle              | 114/23843 | 0.866268 | 0.937444 | 0.92342  | Mapk14/Sil  |
| GO_BP_m4GO:000256somatic division                      | 65/23843  | 0.866748 | 0.937444 | 0.92342  | Polb        |
| GO_BP_m4GO:000740neuroblast differentiation            | 65/23843  | 0.866748 | 0.937444 | 0.92342  | Ctnna1      |
| GO_BP_m4GO:000854visual learning                       | 65/23843  | 0.866748 | 0.937444 | 0.92342  | Synpo       |
| GO_BP_m4GO:001050negative regulation of cell cycle     | 65/23843  | 0.866748 | 0.937444 | 0.92342  | Sec22b      |
| GO_BP_m4GO:001644somatic cell division                 | 65/23843  | 0.866748 | 0.937444 | 0.92342  | Polb        |
| GO_BP_m4GO:001657histone deacetylation                 | 65/23843  | 0.866748 | 0.937444 | 0.92342  | Sfpq        |

|                   |                         |        |           |          |          |          |              |
|-------------------|-------------------------|--------|-----------|----------|----------|----------|--------------|
| GO_BP_m4GO:004226 | natural killer cell     | 1/727  | 65/23843  | 0.866748 | 0.937444 | 0.92342  | Serpinb9     |
| GO_BP_m4GO:000836 | regulation of           | 3/727  | 159/23843 | 0.866857 | 0.937444 | 0.92342  | Arhgap18/    |
| GO_BP_m4GO:000663 | protein import          | 3/727  | 160/23843 | 0.869611 | 0.939608 | 0.925551 | Agap3/Gas    |
| GO_BP_m4GO:000028 | mitotic cyclin          | 1/727  | 66/23843  | 0.870822 | 0.939608 | 0.925551 | 12-Sep       |
| GO_BP_m4GO:000263 | regulation of           | 1/727  | 66/23843  | 0.870822 | 0.939608 | 0.925551 | Il13         |
| GO_BP_m4GO:000865 | cellular amino acid     | 1/727  | 66/23843  | 0.870822 | 0.939608 | 0.925551 | Bhmt         |
| GO_BP_m4GO:000988 | embryonic               | 1/727  | 66/23843  | 0.870822 | 0.939608 | 0.925551 | Peg12        |
| GO_BP_m4GO:003043 | ubiquitin-conjugation   | 1/727  | 66/23843  | 0.870822 | 0.939608 | 0.925551 | Stt3b        |
| GO_BP_m4GO:005129 | centrosome organization | 1/727  | 66/23843  | 0.870822 | 0.939608 | 0.925551 | Cep152       |
| GO_BP_m4GO:006068 | regulation of           | 1/727  | 66/23843  | 0.870822 | 0.939608 | 0.925551 | Rtn4         |
| GO_BP_m4GO:190179 | regulation of           | 1/727  | 66/23843  | 0.870822 | 0.939608 | 0.925551 | Smyd2        |
| GO_BP_m4GO:190357 | regulation of           | 1/727  | 66/23843  | 0.870822 | 0.939608 | 0.925551 | Pid1         |
| GO_BP_m4GO:000751 | muscle organization     | 9/727  | 405/23843 | 0.87256  | 0.940892 | 0.926815 | Cops2/Dsp    |
| GO_BP_m4GO:001056 | regulation of           | 2/727  | 116/23843 | 0.872603 | 0.940892 | 0.926815 | Apoa4/Irs2   |
| GO_BP_m4GO:001493 | myotube development     | 2/727  | 116/23843 | 0.872603 | 0.940892 | 0.926815 | Mapk14/Sil   |
| GO_BP_m4GO:000222 | natural killer cell     | 1/727  | 67/23843  | 0.874772 | 0.941532 | 0.927446 | Serpinb9     |
| GO_BP_m4GO:000643 | tRNA modification       | 1/727  | 67/23843  | 0.874772 | 0.941532 | 0.927446 | Wdr4         |
| GO_BP_m4GO:000694 | regulation of           | 1/727  | 67/23843  | 0.874772 | 0.941532 | 0.927446 | Lck          |
| GO_BP_m4GO:003265 | regulation of           | 1/727  | 67/23843  | 0.874772 | 0.941532 | 0.927446 | Gas6         |
| GO_BP_m4GO:005088 | neuromuscular           | 1/727  | 67/23843  | 0.874772 | 0.941532 | 0.927446 | Nkx6-2       |
| GO_BP_m4GO:005114 | smooth muscle           | 1/727  | 67/23843  | 0.874772 | 0.941532 | 0.927446 | Sgcb         |
| GO_BP_m4GO:190488 | cranial skeletal        | 1/727  | 67/23843  | 0.874772 | 0.941532 | 0.927446 | Fgf4         |
| GO_BP_m4GO:001982 | stem cell proliferation | 3/727  | 162/23843 | 0.874969 | 0.941532 | 0.927446 | Fgf4/Ldb2/   |
| GO_BP_m4GO:004312 | regulation of           | 3/727  | 162/23843 | 0.874969 | 0.941532 | 0.927446 | Rela/Ripk1.  |
| GO_BP_m4GO:001598 | energy derivation       | 5/727  | 247/23843 | 0.875408 | 0.941792 | 0.927702 | Cyca/Cyp11   |
| GO_BP_m4GO:004572 | positive regulation of  | 2/727  | 117/23843 | 0.875665 | 0.941857 | 0.927767 | Eif3e/Erbbr2 |
| GO_BP_m4GO:000007 | regulation of           | 1/727  | 68/23843  | 0.878601 | 0.943805 | 0.929685 | Pim1         |
| GO_BP_m4GO:000763 | visual behavior         | 1/727  | 68/23843  | 0.878601 | 0.943805 | 0.929685 | Synpo        |
| GO_BP_m4GO:004584 | negative regulation of  | 1/727  | 68/23843  | 0.878601 | 0.943805 | 0.929685 | Mir1a-2      |
| GO_BP_m4GO:004864 | regulation of           | 1/727  | 68/23843  | 0.878601 | 0.943805 | 0.929685 | Sox17        |
| GO_BP_m4GO:000666 | sphingolipid            | 2/727  | 118/23843 | 0.87866  | 0.943805 | 0.929685 | A4galt/B3g   |
| GO_BP_m4GO:000709 | centrosome organization | 2/727  | 118/23843 | 0.87866  | 0.943805 | 0.929685 | Aurka/Cep    |
| GO_BP_m4GO:007008 | glycosylation           | 4/727  | 207/23843 | 0.879467 | 0.944341 | 0.930213 | B3gnt5/Fut   |
| GO_BP_m4GO:000268 | negative regulation of  | 10/727 | 448/23843 | 0.879647 | 0.944341 | 0.930213 | Bcl10/Btn2   |
| GO_BP_m4GO:004576 | regulation of           | 6/727  | 290/23843 | 0.879752 | 0.944341 | 0.930213 | C3ar1/Efna   |
| GO_BP_m4GO:003243 | regulation of           | 2/727  | 119/23843 | 0.881588 | 0.945181 | 0.93104  | Aurka/Socs   |
| GO_BP_m4GO:000225 | activation of           | 11/727 | 488/23843 | 0.88188  | 0.945181 | 0.93104  | Bcl10/Btn2   |
| GO_BP_m4GO:000608 | cellular aldosterone    | 1/727  | 69/23843  | 0.882313 | 0.945181 | 0.93104  | Grhpr        |
| GO_BP_m4GO:002202 | telencephalon           | 1/727  | 69/23843  | 0.882313 | 0.945181 | 0.93104  | Rtn4         |
| GO_BP_m4GO:005081 | regulation of           | 1/727  | 69/23843  | 0.882313 | 0.945181 | 0.93104  | Vdr          |
| GO_BP_m4GO:005118 | positive regulation of  | 1/727  | 69/23843  | 0.882313 | 0.945181 | 0.93104  | Mapk14       |
| GO_BP_m4GO:006019 | regulation of           | 1/727  | 69/23843  | 0.882313 | 0.945181 | 0.93104  | Apoa4        |
| GO_BP_m4GO:190199 | positive regulation of  | 1/727  | 69/23843  | 0.882313 | 0.945181 | 0.93104  | Anp32b       |
| GO_BP_m4GO:200057 | positive regulation of  | 1/727  | 69/23843  | 0.882313 | 0.945181 | 0.93104  | C3ar1        |
| GO_BP_m4GO:009872 | maintenance of          | 3/727  | 166/23843 | 0.885102 | 0.94755  | 0.933374 | Fgf4/Ldb2/   |
| GO_BP_m4GO:200024 | regulation of           | 3/727  | 166/23843 | 0.885102 | 0.94755  | 0.933374 | Astl/Aurka/  |
| GO_BP_m4GO:009881 | nuclear chromosome      | 5/727  | 252/23843 | 0.885844 | 0.94755  | 0.933374 | Cenps/Brip   |
| GO_BP_m4GO:000683 | nitric oxide            | 1/727  | 70/23843  | 0.885912 | 0.94755  | 0.933374 | Wdr35        |

|                               |        |           |          |          |          |              |
|-------------------------------|--------|-----------|----------|----------|----------|--------------|
| GO_BP_m4GO:004545bone resor   | 1/727  | 70/23843  | 0.885912 | 0.94755  | 0.933374 | Car2         |
| GO_BP_m4GO:004863negative re  | 1/727  | 70/23843  | 0.885912 | 0.94755  | 0.933374 | Mir1a-2      |
| GO_BP_m4GO:004884artery mor   | 1/727  | 70/23843  | 0.885912 | 0.94755  | 0.933374 | Folr1        |
| GO_BP_m4GO:003007insulin secr | 4/727  | 210/23843 | 0.886169 | 0.947612 | 0.933435 | C1qtnf12/I   |
| GO_BP_m4GO:007124cellular res | 2/727  | 121/23843 | 0.887249 | 0.948555 | 0.934364 | Cyp1a2/Mt    |
| GO_BP_m4GO:000091cytokines    | 3/727  | 167/23843 | 0.887519 | 0.948631 | 0.934439 | Aurka/Sept   |
| GO_BP_m4GO:00182Cpeptidyl-ly  | 7/727  | 335/23843 | 0.888254 | 0.948862 | 0.934666 | Camkmt/N     |
| GO_BP_m4GO:005066cytokine se  | 4/727  | 211/23843 | 0.88833  | 0.948862 | 0.934666 | Btn2a2/Ga    |
| GO_BP_m4GO:190353negative re  | 4/727  | 211/23843 | 0.88833  | 0.948862 | 0.934666 | Btn2a2/Cb    |
| GO_BP_m4GO:00022Csomatic div  | 1/727  | 71/23843  | 0.889401 | 0.948946 | 0.934749 | Polb         |
| GO_BP_m4GO:004362response tr  | 1/727  | 71/23843  | 0.889401 | 0.948946 | 0.934749 | Mir451a      |
| GO_BP_m4GO:005188regulation   | 1/727  | 71/23843  | 0.889401 | 0.948946 | 0.934749 | Pid1         |
| GO_BP_m4GO:190186negative re  | 1/727  | 71/23843  | 0.889401 | 0.948946 | 0.934749 | Mir1a-2      |
| GO_BP_m4GO:190331positive re  | 1/727  | 71/23843  | 0.889401 | 0.948946 | 0.934749 | Zfp3611      |
| GO_BP_m4GO:00091Ccoenzyme     | 3/727  | 168/23843 | 0.889889 | 0.949134 | 0.934934 | Coq6/Kynu    |
| GO_BP_m4GO:004269muscle cell  | 8/727  | 376/23843 | 0.889974 | 0.949134 | 0.934934 | Fhl2/Mapk    |
| GO_BP_m4GO:009059sensory or   | 6/727  | 296/23843 | 0.891039 | 0.949377 | 0.935174 | Cabp4/Gna    |
| GO_BP_m4GO:000663fatty acid   | 8/727  | 377/23843 | 0.891593 | 0.949377 | 0.935174 | Apoa4/Ces    |
| GO_BP_m4GO:00509Cdetection c  | 8/727  | 377/23843 | 0.891593 | 0.949377 | 0.935174 | Gnat1/Lxn/   |
| GO_BP_m4GO:000959detection c  | 7/727  | 337/23843 | 0.891683 | 0.949377 | 0.935174 | Gnat1/Olfr   |
| GO_BP_m4GO:009028regulation   | 5/727  | 255/23843 | 0.891739 | 0.949377 | 0.935174 | Fam72a/Fg    |
| GO_BP_m4GO:000721Notch sign   | 3/727  | 169/23843 | 0.892215 | 0.949377 | 0.935174 | Akt1s1/Ne    |
| GO_BP_m4GO:000206columnar/c   | 1/727  | 72/23843  | 0.892784 | 0.949377 | 0.935174 | Mir7-2       |
| GO_BP_m4GO:002188forebrain c  | 1/727  | 72/23843  | 0.892784 | 0.949377 | 0.935174 | Rtn4         |
| GO_BP_m4GO:004214retrograde   | 1/727  | 72/23843  | 0.892784 | 0.949377 | 0.935174 | Bet1l        |
| GO_BP_m4GO:004567regulation   | 1/727  | 72/23843  | 0.892784 | 0.949377 | 0.935174 | Car2         |
| GO_BP_m4GO:005068regulation   | 1/727  | 72/23843  | 0.892784 | 0.949377 | 0.935174 | Il27         |
| GO_BP_m4GO:006059neuroepith   | 1/727  | 72/23843  | 0.892784 | 0.949377 | 0.935174 | Tmem231      |
| GO_BP_m4GO:007019chromosom    | 1/727  | 72/23843  | 0.892784 | 0.949377 | 0.935174 | Brip1        |
| GO_BP_m4GO:000695compleme     | 1/727  | 170/23843 | 0.894497 | 0.950987 | 0.93676  | Ighv9-4/M    |
| GO_BP_m4GO:000244leukocyte    | 10/727 | 458/23843 | 0.894855 | 0.951124 | 0.936895 | Ager/Bcl10   |
| GO_BP_m4GO:000717transmem     | 7/727  | 339/23843 | 0.895023 | 0.951124 | 0.936895 | Folr1/Fst/Ir |
| GO_BP_m4GO:000703vacuolar tr  | 2/727  | 124/23843 | 0.895272 | 0.951177 | 0.936947 | Gak/Rilp     |
| GO_BP_m4GO:00462Cnitric oxide | 1/727  | 73/23843  | 0.896063 | 0.951382 | 0.937149 | Wdr35        |
| GO_BP_m4GO:006151myeloid ce   | 1/727  | 73/23843  | 0.896063 | 0.951382 | 0.937149 | Gata1        |
| GO_BP_m4GO:190402regulation   | 1/727  | 73/23843  | 0.896063 | 0.951382 | 0.937149 | Pim1         |
| GO_BP_m4GO:005105negative re  | 11/727 | 498/23843 | 0.896329 | 0.951454 | 0.93722  | Btn2a2/Cb    |
| GO_BP_m4GO:190211regulation   | 3/727  | 171/23843 | 0.896735 | 0.951674 | 0.937437 | 5330417C2    |
| GO_BP_m4GO:00509Cneuromusc    | 2/727  | 125/23843 | 0.897826 | 0.95262  | 0.938369 | Nkx6-2/Slu   |
| GO_BP_m4GO:005118cofactor bi  | 4/727  | 216/23843 | 0.898603 | 0.953233 | 0.938972 | Coq6/Cyp1    |
| GO_BP_m4GO:001973antibacteri  | 1/727  | 74/23843  | 0.899241 | 0.953699 | 0.939431 | AY761184     |
| GO_BP_m4GO:005132meiotic cel  | 7/727  | 342/23843 | 0.89987  | 0.954034 | 0.939761 | Cenps/Aur    |
| GO_BP_m4GO:003102microtubul   | 2/727  | 126/23843 | 0.900322 | 0.954034 | 0.939761 | Aurka/Cep    |
| GO_BP_m4GO:002195central ner  | 4/727  | 217/23843 | 0.900555 | 0.954034 | 0.939761 | Inhba/Mir2   |
| GO_BP_m4GO:003032respiratory  | 4/727  | 217/23843 | 0.900555 | 0.954034 | 0.939761 | Cyp1a2/Sp    |
| GO_BP_m4GO:009009regulation   | 4/727  | 217/23843 | 0.900555 | 0.954034 | 0.939761 | Folr1/Fst/Ir |
| GO_BP_m4GO:004859eye morph    | 3/727  | 173/23843 | 0.901084 | 0.954383 | 0.940105 | Cabp4/Gna    |
| GO_BP_m4GO:004578positive re  | 7/727  | 343/23843 | 0.901443 | 0.954551 | 0.940271 | Anp32b/Au    |

|                                      |           |          |          |          |              |
|--------------------------------------|-----------|----------|----------|----------|--------------|
| GO_BP_m4GO:001922regulation 1/727    | 75/23843  | 0.902323 | 0.954797 | 0.940513 | Htr2c        |
| GO_BP_m4GO:007134cellular res 1/727  | 75/23843  | 0.902323 | 0.954797 | 0.940513 | Rela         |
| GO_BP_m4GO:009775positive reç1/727   | 75/23843  | 0.902323 | 0.954797 | 0.940513 | Esr2         |
| GO_BP_m4GO:003288regulation 4/727    | 218/23843 | 0.902474 | 0.954797 | 0.940513 | ErbB2/Men    |
| GO_BP_m4GO:00027C positive reç2/727  | 127/23843 | 0.902761 | 0.95489  | 0.940604 | Il13/Vamp8   |
| GO_BP_m4GO:005089cognition 6/727     | 303/23843 | 0.903056 | 0.95499  | 0.940703 | Ager/Esr2/   |
| GO_BP_m4GO:006113morphogeı4/727      | 219/23843 | 0.90436  | 0.955473 | 0.941178 | Grb2/Nfatc   |
| GO_BP_m4GO:005118cofactor m 10/727   | 465/23843 | 0.904528 | 0.955473 | 0.941178 | Apoa4/Coc    |
| GO_BP_m4GO:000945RNA modif2/727      | 128/23843 | 0.905145 | 0.955473 | 0.941178 | Mrm2/Wdr     |
| GO_BP_m4GO:000597glycogen n1/727     | 76/23843  | 0.905311 | 0.955473 | 0.941178 | Irs2         |
| GO_BP_m4GO:000607cellular glu 1/727  | 76/23843  | 0.905311 | 0.955473 | 0.941178 | Irs2         |
| GO_BP_m4GO:000649protein O- 1/727    | 76/23843  | 0.905311 | 0.955473 | 0.941178 | B3gnt5       |
| GO_BP_m4GO:004404glucan met1/727     | 76/23843  | 0.905311 | 0.955473 | 0.941178 | Irs2         |
| GO_BP_m4GO:004591positive reç1/727   | 76/23843  | 0.905311 | 0.955473 | 0.941178 | Irs2         |
| GO_BP_m4GO:005193catecholam 1/727    | 76/23843  | 0.905311 | 0.955473 | 0.941178 | Rtn4         |
| GO_BP_m4GO:000081sister chrör3/727   | 176/23843 | 0.907299 | 0.956636 | 0.942324 | Rmi2/Sfpq,   |
| GO_BP_m4GO:000673coenzyme 6/727      | 306/23843 | 0.907847 | 0.956636 | 0.942324 | Coq6/Folr1   |
| GO_BP_m4GO:003133negative re4/727    | 221/23843 | 0.908036 | 0.956636 | 0.942324 | Efna1/Nba:   |
| GO_BP_m4GO:000001regulation 1/727    | 77/23843  | 0.908207 | 0.956636 | 0.942324 | Recql5       |
| GO_BP_m4GO:001038regulation 1/727    | 77/23843  | 0.908207 | 0.956636 | 0.942324 | Hus1         |
| GO_BP_m4GO:006011inner ear rç1/727   | 77/23843  | 0.908207 | 0.956636 | 0.942324 | Tshr         |
| GO_BP_m4GO:006097coronary vı1/727    | 77/23843  | 0.908207 | 0.956636 | 0.942324 | Prokr1       |
| GO_BP_m4GO:006164cytoskeletc 1/727   | 77/23843  | 0.908207 | 0.956636 | 0.942324 | 12-Sep       |
| GO_BP_m4GO:004311receptor m3/727     | 177/23843 | 0.90929  | 0.956636 | 0.942324 | Grb2/Kif16   |
| GO_BP_m4GO:003267regulation 2/727    | 130/23843 | 0.909748 | 0.956636 | 0.942324 | Gas6/Socs5   |
| GO_BP_m4GO:005166localizator 2/727   | 130/23843 | 0.909748 | 0.956636 | 0.942324 | Sec13/Snaç   |
| GO_BP_m4GO:190336positive reç2/727   | 130/23843 | 0.909748 | 0.956636 | 0.942324 | Aurka/Socs   |
| GO_BP_m4GO:190336regulation 4/727    | 222/23843 | 0.909826 | 0.956636 | 0.942324 | Aurka/Efna   |
| GO_BP_m4GO:007259establishmı9/727    | 430/23843 | 0.910647 | 0.956636 | 0.942324 | Agap3/Ddi    |
| GO_BP_m4GO:000226lymphocyte 1/727    | 78/23843  | 0.911015 | 0.956636 | 0.942324 | Bcl10        |
| GO_BP_m4GO:003016platelet act 1/727  | 78/23843  | 0.911015 | 0.956636 | 0.942324 | Gata1        |
| GO_BP_m4GO:003019regulation 1/727    | 78/23843  | 0.911015 | 0.956636 | 0.942324 | F12          |
| GO_BP_m4GO:004603ADP metak 1/727     | 78/23843  | 0.911015 | 0.956636 | 0.942324 | Ak3          |
| GO_BP_m4GO:00513C establishmı 1/727  | 78/23843  | 0.911015 | 0.956636 | 0.942324 | Spdl1        |
| GO_BP_m4GO:006007excitatory ç 1/727  | 78/23843  | 0.911015 | 0.956636 | 0.942324 | Hcrt         |
| GO_BP_m4GO:006041cardiac seç 1/727   | 78/23843  | 0.911015 | 0.956636 | 0.942324 | Nfatc1       |
| GO_BP_m4GO:190004regulation 1/727    | 78/23843  | 0.911015 | 0.956636 | 0.942324 | F12          |
| GO_BP_m4GO:200105reactive nit 1/727  | 78/23843  | 0.911015 | 0.956636 | 0.942324 | Wdr35        |
| GO_BP_m4GO:190156fatty acid d2/727   | 131/23843 | 0.911971 | 0.957429 | 0.943106 | Ces2h/Cyp    |
| GO_BP_m4GO:004887multicellulç 7/727  | 351/23843 | 0.913285 | 0.958022 | 0.943689 | Car2/Cdh3    |
| GO_BP_m4GO:190121negative re4/727    | 224/23843 | 0.913314 | 0.958022 | 0.943689 | Esr2/Il13/It |
| GO_BP_m4GO:00032C cardiac ver 1/727  | 79/23843  | 0.913737 | 0.958022 | 0.943689 | Dsp          |
| GO_BP_m4GO:003261interleukin 1/727   | 79/23843  | 0.913737 | 0.958022 | 0.943689 | Gas6         |
| GO_BP_m4GO:00345C protein loc 1/727  | 79/23843  | 0.913737 | 0.958022 | 0.943689 | Spdl1        |
| GO_BP_m4GO:00500C chromosor 1/727    | 79/23843  | 0.913737 | 0.958022 | 0.943689 | Spdl1        |
| GO_BP_m4GO:00516C detection c 10/727 | 474/23843 | 0.915861 | 0.959106 | 0.944757 | Cabp4/Gnç    |
| GO_BP_m4GO:003527endocrine :2/727    | 133/23843 | 0.916263 | 0.959106 | 0.944757 | Duox2/Nkx    |
| GO_BP_m4GO:00507C negative re2/727   | 133/23843 | 0.916263 | 0.959106 | 0.944757 | Btn2a2/Ga:   |

|                                 |       |           |          |          |          |             |
|---------------------------------|-------|-----------|----------|----------|----------|-------------|
| GO_BP_m4GO:005071positive reç   | 2/727 | 133/23843 | 0.916263 | 0.959106 | 0.944757 | Mapk14/M    |
| GO_BP_m4GO:00070C plasma me     | 1/727 | 80/23843  | 0.916376 | 0.959106 | 0.944757 | A4galt      |
| GO_BP_m4GO:001491regulation     | 1/727 | 80/23843  | 0.916376 | 0.959106 | 0.944757 | Ager        |
| GO_BP_m4GO:00229C respiratory   | 1/727 | 80/23843  | 0.916376 | 0.959106 | 0.944757 | Cyca        |
| GO_BP_m4GO:19001E positive reç  | 1/727 | 80/23843  | 0.916376 | 0.959106 | 0.944757 | Mapk14      |
| GO_BP_m4GO:19012C nucleoside    | 2/727 | 134/23843 | 0.918334 | 0.960312 | 0.945945 | Nudt5/Nuc   |
| GO_BP_m4GO:00487E branching     | 3/727 | 182/23843 | 0.918678 | 0.960312 | 0.945945 | Nfatc1/Spr  |
| GO_BP_m4GO:00032E ventricular   | 1/727 | 81/23843  | 0.918935 | 0.960312 | 0.945945 | Nfatc1      |
| GO_BP_m4GO:000647protein deç    | 1/727 | 81/23843  | 0.918935 | 0.960312 | 0.945945 | Sfpq        |
| GO_BP_m4GO:00486E neuron fatç   | 1/727 | 81/23843  | 0.918935 | 0.960312 | 0.945945 | Nkx6-2      |
| GO_BP_m4GO:00975E lamellipodi   | 1/727 | 81/23843  | 0.918935 | 0.960312 | 0.945945 | Spata13     |
| GO_BP_m4GO:19019E positive reç  | 1/727 | 81/23843  | 0.918935 | 0.960312 | 0.945945 | Anp32b      |
| GO_BP_m4GO:00104C proteasom     | 9/727 | 437/23843 | 0.919408 | 0.960596 | 0.946225 | Agap3/Aur   |
| GO_BP_m4GO:00069C phagocyto     | 6/727 | 314/23843 | 0.919635 | 0.960624 | 0.946253 | Ager/Gas6,  |
| GO_BP_m4GO:00326E regulation    | 2/727 | 135/23843 | 0.920358 | 0.960631 | 0.946259 | Gas6/Ripk1  |
| GO_BP_m4GO:00464C nicotinamic   | 2/727 | 135/23843 | 0.920358 | 0.960631 | 0.946259 | Kynu/Pdhx   |
| GO_BP_m4GO:004354endothelial    | 3/727 | 183/23843 | 0.920445 | 0.960631 | 0.946259 | Ager/Efna1  |
| GO_BP_m4GO:005122negative reç   | 3/727 | 183/23843 | 0.920445 | 0.960631 | 0.946259 | Btn2a2/Ga:  |
| GO_BP_m4GO:00434E regulation    | 1/727 | 82/23843  | 0.921415 | 0.960632 | 0.94626  | Zfp3611     |
| GO_BP_m4GO:005081regulation     | 1/727 | 82/23843  | 0.921415 | 0.960632 | 0.94626  | F12         |
| GO_BP_m4GO:00024E humoral ir    | 3/727 | 184/23843 | 0.922178 | 0.960632 | 0.94626  | Ighv9-4/M   |
| GO_BP_m4GO:00456E regulation    | 2/727 | 136/23843 | 0.922334 | 0.960632 | 0.94626  | Nfatc1/Tnr  |
| GO_BP_m4GO:190134regulation     | 6/727 | 316/23843 | 0.922368 | 0.960632 | 0.94626  | C3ar1/Efna  |
| GO_BP_m4GO:00900E positive reç  | 4/727 | 230/23843 | 0.923067 | 0.960632 | 0.94626  | Anp32b/Pi   |
| GO_BP_m4GO:00451E cell fate co  | 5/727 | 274/23843 | 0.923304 | 0.960632 | 0.94626  | Gata1/Nkx1  |
| GO_BP_m4GO:000722integrin-m     | 1/727 | 83/23843  | 0.923819 | 0.960632 | 0.94626  | Ctnna1      |
| GO_BP_m4GO:00091C purine nuc    | 1/727 | 83/23843  | 0.923819 | 0.960632 | 0.94626  | Ak3         |
| GO_BP_m4GO:000917purine ribo    | 1/727 | 83/23843  | 0.923819 | 0.960632 | 0.94626  | Ak3         |
| GO_BP_m4GO:00327E positive reç  | 1/727 | 83/23843  | 0.923819 | 0.960632 | 0.94626  | Ripk1       |
| GO_BP_m4GO:00424C mechanore     | 1/727 | 83/23843  | 0.923819 | 0.960632 | 0.94626  | Tshr        |
| GO_BP_m4GO:005114positive reç   | 1/727 | 83/23843  | 0.923819 | 0.960632 | 0.94626  | Mapk14      |
| GO_BP_m4GO:00514C regulation    | 1/727 | 83/23843  | 0.923819 | 0.960632 | 0.94626  | Synpo       |
| GO_BP_m4GO:00193C pyridine nu   | 2/727 | 137/23843 | 0.924264 | 0.960632 | 0.94626  | Kynu/Pdhx   |
| GO_BP_m4GO:00313C negative re   | 2/727 | 137/23843 | 0.924264 | 0.960632 | 0.94626  | Sptan1/Tm   |
| GO_BP_m4GO:00326C interleukin   | 2/727 | 137/23843 | 0.924264 | 0.960632 | 0.94626  | Gas6/Socs2  |
| GO_BP_m4GO:003264tumor necr     | 2/727 | 137/23843 | 0.924264 | 0.960632 | 0.94626  | Gas6/Ripk1  |
| GO_BP_m4GO:19035E regulation    | 2/727 | 137/23843 | 0.924264 | 0.960632 | 0.94626  | Gas6/Ripk1  |
| GO_BP_m4GO:00095E fertilization | 3/727 | 186/23843 | 0.92554  | 0.96113  | 0.946751 | Astl/Catspe |
| GO_BP_m4GO:00345C protein loc   | 5/727 | 276/23843 | 0.9261   | 0.96113  | 0.946751 | Agap3/Dcll  |
| GO_BP_m4GO:00106E regulation    | 1/727 | 84/23843  | 0.92615  | 0.96113  | 0.946751 | Fndc1       |
| GO_BP_m4GO:00193E nicotinamic   | 1/727 | 84/23843  | 0.92615  | 0.96113  | 0.946751 | Kynu        |
| GO_BP_m4GO:00508C negative re   | 1/727 | 84/23843  | 0.92615  | 0.96113  | 0.946751 | Ager        |
| GO_BP_m4GO:190352positive reç   | 1/727 | 84/23843  | 0.92615  | 0.96113  | 0.946751 | Htr2c       |
| GO_BP_m4GO:19035E positive reç  | 1/727 | 84/23843  | 0.92615  | 0.96113  | 0.946751 | Ripk1       |
| GO_BP_m4GO:00069E compleme      | 3/727 | 187/23843 | 0.927171 | 0.961563 | 0.947177 | Ighv9-4/M   |
| GO_BP_m4GO:00447C multi-mult    | 3/727 | 187/23843 | 0.927171 | 0.961563 | 0.947177 | Mirlet7c-2, |
| GO_BP_m4GO:19049E negative re   | 3/727 | 187/23843 | 0.927171 | 0.961563 | 0.947177 | Btn2a2/Ga:  |
| GO_BP_m4GO:00425E myelinatio    | 2/727 | 139/23843 | 0.927989 | 0.961805 | 0.947416 | Erbp2/Nkx1  |



|                   |              |       |           |          |          |          |             |
|-------------------|--------------|-------|-----------|----------|----------|----------|-------------|
| GO_BP_m4GO:002195 | central ner  | 1/727 | 85/23843  | 0.92841  | 0.961805 | 0.947416 | Zeb2        |
| GO_BP_m4GO:002293 | electron tra | 1/727 | 85/23843  | 0.92841  | 0.961805 | 0.947416 | Cycc        |
| GO_BP_m4GO:004353 | regulation   | 1/727 | 85/23843  | 0.92841  | 0.961805 | 0.947416 | Efna1       |
| GO_BP_m4GO:200102 | positive re  | 1/727 | 85/23843  | 0.92841  | 0.961805 | 0.947416 | Rps3        |
| GO_BP_m4GO:000206 | columnar/c   | 2/727 | 140/23843 | 0.929786 | 0.962198 | 0.947803 | Mir7-2/Tm   |
| GO_BP_m4GO:000221 | activation c | 2/727 | 140/23843 | 0.929786 | 0.962198 | 0.947803 | Rela/Sfpq   |
| GO_BP_m4GO:007173 | tumor necr   | 2/727 | 140/23843 | 0.929786 | 0.962198 | 0.947803 | Gas6/Ripk1  |
| GO_BP_m4GO:007203 | nephron de   | 2/727 | 140/23843 | 0.929786 | 0.962198 | 0.947803 | C3ar1/Ret   |
| GO_BP_m4GO:000716 | cell-matrix  | 3/727 | 189/23843 | 0.930334 | 0.962198 | 0.947803 | Muc4/Tiam   |
| GO_BP_m4GO:000611 | energy res   | 1/727 | 86/23843  | 0.930601 | 0.962198 | 0.947803 | Irs2        |
| GO_BP_m4GO:000611 | oxidative p  | 1/727 | 86/23843  | 0.930601 | 0.962198 | 0.947803 | Cycc        |
| GO_BP_m4GO:000616 | nucleoside   | 1/727 | 86/23843  | 0.930601 | 0.962198 | 0.947803 | Nme5        |
| GO_BP_m4GO:003591 | skeletal m   | 1/727 | 86/23843  | 0.930601 | 0.962198 | 0.947803 | Cops2       |
| GO_BP_m4GO:000283 | regulation   | 2/727 | 141/23843 | 0.93154  | 0.962545 | 0.948144 | Il27/Muc4   |
| GO_BP_m4GO:001097 | transport a  | 2/727 | 141/23843 | 0.93154  | 0.962545 | 0.948144 | Dynll2/Wdr  |
| GO_BP_m4GO:009911 | microtubul   | 2/727 | 141/23843 | 0.93154  | 0.962545 | 0.948144 | Dynll2/Wdr  |
| GO_BP_m4GO:001493 | smooth m     | 1/727 | 87/23843  | 0.932724 | 0.963066 | 0.948658 | Ager        |
| GO_BP_m4GO:001936 | pyridine n   | 1/727 | 87/23843  | 0.932724 | 0.963066 | 0.948658 | Kynu        |
| GO_BP_m4GO:003101 | pancreas d   | 1/727 | 87/23843  | 0.932724 | 0.963066 | 0.948658 | Nkx6-2      |
| GO_BP_m4GO:000279 | negative re  | 2/727 | 142/23843 | 0.933253 | 0.963066 | 0.948658 | Btn2a2/Ga   |
| GO_BP_m4GO:000727 | ensheathm    | 2/727 | 142/23843 | 0.933253 | 0.963066 | 0.948658 | Erbp2/Nkx1  |
| GO_BP_m4GO:000836 | axon enshe   | 2/727 | 142/23843 | 0.933253 | 0.963066 | 0.948658 | Erbp2/Nkx1  |
| GO_BP_m4GO:002176 | limbic syst  | 1/727 | 88/23843  | 0.934783 | 0.963544 | 0.949129 | Zeb2        |
| GO_BP_m4GO:003296 | collagen m   | 1/727 | 88/23843  | 0.934783 | 0.963544 | 0.949129 | Ager        |
| GO_BP_m4GO:004693 | nucleotide   | 1/727 | 88/23843  | 0.934783 | 0.963544 | 0.949129 | Nme5        |
| GO_BP_m4GO:007267 | lymphocyte   | 1/727 | 88/23843  | 0.934783 | 0.963544 | 0.949129 | Gas6        |
| GO_BP_m4GO:190342 | regulation   | 1/727 | 88/23843  | 0.934783 | 0.963544 | 0.949129 | Wdr35       |
| GO_BP_m4GO:000323 | cardiac ver  | 2/727 | 143/23843 | 0.934926 | 0.963544 | 0.949129 | Dsp/Nfatc1  |
| GO_BP_m4GO:005105 | regulation   | 8/727 | 411/23843 | 0.935854 | 0.963999 | 0.949577 | C3ar1/Hcrt  |
| GO_BP_m4GO:005104 | negative re  | 4/727 | 239/23843 | 0.935856 | 0.963999 | 0.949577 | Btn2a2/Cb   |
| GO_BP_m4GO:001839 | internal pe  | 2/727 | 144/23843 | 0.936558 | 0.963999 | 0.949577 | Nat8f1/Dr1  |
| GO_BP_m4GO:005109 | regulation   | 7/727 | 370/23843 | 0.936606 | 0.963999 | 0.949577 | Ager/Aurka  |
| GO_BP_m4GO:000333 | cardiac mu   | 1/727 | 89/23843  | 0.936779 | 0.963999 | 0.949577 | Tiam1       |
| GO_BP_m4GO:001065 | muscle cell  | 1/727 | 89/23843  | 0.936779 | 0.963999 | 0.949577 | Fndc1       |
| GO_BP_m4GO:004001 | regulation   | 1/727 | 89/23843  | 0.936779 | 0.963999 | 0.949577 | Tshr        |
| GO_BP_m4GO:004873 | skeletal sys | 4/727 | 240/23843 | 0.937151 | 0.964174 | 0.94975  | Fgf4/Hoxa1  |
| GO_BP_m4GO:005103 | positive re  | 3/727 | 194/23843 | 0.937698 | 0.96453  | 0.9501   | Eif3e/Tiam1 |
| GO_BP_m4GO:001993 | cAMP-mec     | 2/727 | 145/23843 | 0.938152 | 0.964789 | 0.950355 | Gpr61/Tshr  |
| GO_BP_m4GO:004508 | regulation   | 4/727 | 241/23843 | 0.938422 | 0.96486  | 0.950425 | Dusp10/Re   |
| GO_BP_m4GO:005084 | regulation   | 1/727 | 90/23843  | 0.938714 | 0.964952 | 0.950516 | Mir1a-2     |
| GO_BP_m4GO:003653 | ERAD path    | 1/727 | 91/23843  | 0.94059  | 0.966672 | 0.95221  | Stt3b       |
| GO_BP_m4GO:000028 | nuclear div  | 8/727 | 416/23843 | 0.940811 | 0.966692 | 0.95223  | Cenps/Aurl  |
| GO_BP_m4GO:002154 | pallium de   | 2/727 | 147/23843 | 0.941226 | 0.966911 | 0.952445 | Rtn4/Zeb2   |
| GO_BP_m4GO:000167 | long-chain   | 1/727 | 92/23843  | 0.942408 | 0.967501 | 0.953027 | Cyp2a22     |
| GO_BP_m4GO:001489 | striated m   | 1/727 | 92/23843  | 0.942408 | 0.967501 | 0.953027 | Tiam1       |
| GO_BP_m4GO:006035 | response tr  | 1/727 | 92/23843  | 0.942408 | 0.967501 | 0.953027 | Ly6g6d      |
| GO_BP_m4GO:005114 | regulation   | 2/727 | 148/23843 | 0.942708 | 0.967602 | 0.953126 | Mapk14/Sil  |
| GO_BP_m4GO:000647 | internal pr  | 2/727 | 149/23843 | 0.944155 | 0.968064 | 0.953581 | Nat8f1/Dr1  |

|                                    |           |          |          |          |             |
|------------------------------------|-----------|----------|----------|----------|-------------|
| GO_BP_m4GO:000717transformir2/727  | 149/23843 | 0.944155 | 0.968064 | 0.953581 | Folr1/Vasn  |
| GO_BP_m4GO:003475cellular hor1/727 | 93/23843  | 0.944171 | 0.968064 | 0.953581 | Akr1d1      |
| GO_BP_m4GO:004348regulation 1/727  | 93/23843  | 0.944171 | 0.968064 | 0.953581 | Zfp361l     |
| GO_BP_m4GO:190274regulation 1/727  | 93/23843  | 0.944171 | 0.968064 | 0.953581 | Hus1        |
| GO_BP_m4GO:000195regulation 1/727  | 94/23843  | 0.94588  | 0.969193 | 0.954693 | Gas6        |
| GO_BP_m4GO:001489muscle hyp1/727   | 94/23843  | 0.94588  | 0.969193 | 0.954693 | Tiam1       |
| GO_BP_m4GO:011002regulation 1/727  | 94/23843  | 0.94588  | 0.969193 | 0.954693 | Synpo       |
| GO_BP_m4GO:000244lymphocyte7/727   | 381/23843 | 0.947418 | 0.970266 | 0.955751 | Ager/Bcl10  |
| GO_BP_m4GO:004684bone remo1/727    | 95/23843  | 0.947537 | 0.970266 | 0.955751 | Car2        |
| GO_BP_m4GO:200124negative re1/727  | 95/23843  | 0.947537 | 0.970266 | 0.955751 | Nme5        |
| GO_BP_m4GO:000275immune re8/727    | 424/23843 | 0.948044 | 0.970577 | 0.956057 | Bcl10/Btn2  |
| GO_BP_m4GO:004828organelle fi9/727 | 466/23843 | 0.948302 | 0.970634 | 0.956113 | Cenps/Aurl  |
| GO_BP_m4GO:00083Cassociative 1/727 | 96/23843  | 0.949143 | 0.970871 | 0.956346 | Synpo       |
| GO_BP_m4GO:004577positive reç1/727 | 96/23843  | 0.949143 | 0.970871 | 0.956346 | Slc8a1      |
| GO_BP_m4GO:006084artery deve1/727  | 96/23843  | 0.949143 | 0.970871 | 0.956346 | Folr1       |
| GO_BP_m4GO:001839peptidyl-ly2/727  | 153/23843 | 0.949601 | 0.971132 | 0.956603 | Nat8f1/Dr1  |
| GO_BP_m4GO:006034bone morç1/727    | 97/23843  | 0.9507   | 0.971928 | 0.957388 | Fgf4        |
| GO_BP_m4GO:000609generation 6/727  | 342/23843 | 0.951137 | 0.971928 | 0.957388 | Cyca/Cyp1a  |
| GO_BP_m4GO:001606immunoglc4/727    | 253/23843 | 0.951954 | 0.971928 | 0.957388 | Bcl10/Ighv! |
| GO_BP_m4GO:001993cyclic-nucl2/727  | 155/23843 | 0.95213  | 0.971928 | 0.957388 | Gpr61/Tshr  |
| GO_BP_m4GO:000301renal syste1/727  | 98/23843  | 0.952209 | 0.971928 | 0.957388 | Gas6        |
| GO_BP_m4GO:000609pyruvate r1/727   | 98/23843  | 0.952209 | 0.971928 | 0.957388 | Pdhx        |
| GO_BP_m4GO:003209negative re1/727  | 98/23843  | 0.952209 | 0.971928 | 0.957388 | Aurka       |
| GO_BP_m4GO:003223regulation 1/727  | 98/23843  | 0.952209 | 0.971928 | 0.957388 | Synpo       |
| GO_BP_m4GO:005165maintenanç1/727   | 98/23843  | 0.952209 | 0.971928 | 0.957388 | Polr2m      |
| GO_BP_m4GO:001481muscle cell1/727  | 99/23843  | 0.953672 | 0.97264  | 0.958089 | Ager        |
| GO_BP_m4GO:004213neurotrans1/727   | 99/23843  | 0.953672 | 0.97264  | 0.958089 | Wdr35       |
| GO_BP_m4GO:012003positive reç1/727 | 99/23843  | 0.953672 | 0.97264  | 0.958089 | Neurl1a     |
| GO_BP_m4GO:001648protein prc4/727  | 255/23843 | 0.953924 | 0.97264  | 0.958089 | Astl/Ece2/F |
| GO_BP_m4GO:001972B cell medi4/727  | 255/23843 | 0.953924 | 0.97264  | 0.958089 | Bcl10/Ighv! |
| GO_BP_m4GO:000718adenylate ç1/727  | 100/23843 | 0.955091 | 0.973207 | 0.958648 | Tshr        |
| GO_BP_m4GO:005088endocrine ç1/727  | 100/23843 | 0.955091 | 0.973207 | 0.958648 | Inhba       |
| GO_BP_m4GO:006007regulation 1/727  | 100/23843 | 0.955091 | 0.973207 | 0.958648 | Hcrt        |
| GO_BP_m4GO:00307Ccytoskeletc2/727  | 158/23843 | 0.955698 | 0.973619 | 0.959053 | Dynll2/Wdi  |
| GO_BP_m4GO:005101actin filamç2/727 | 159/23843 | 0.95683  | 0.974306 | 0.95973  | Eln/Synpo   |
| GO_BP_m4GO:000165ureteric bu1/727  | 102/23843 | 0.957799 | 0.974306 | 0.95973  | Ret         |
| GO_BP_m4GO:000195regulation 1/727  | 102/23843 | 0.957799 | 0.974306 | 0.95973  | Muc4        |
| GO_BP_m4GO:000282positive reç1/727 | 102/23843 | 0.957799 | 0.974306 | 0.95973  | Socs5       |
| GO_BP_m4GO:000682chloride trç1/727 | 102/23843 | 0.957799 | 0.974306 | 0.95973  | Car2        |
| GO_BP_m4GO:007216mesonephç1/727    | 102/23843 | 0.957799 | 0.974306 | 0.95973  | Ret         |
| GO_BP_m4GO:007216mesonephç1/727    | 102/23843 | 0.957799 | 0.974306 | 0.95973  | Ret         |
| GO_BP_m4GO:000276immune re8/727    | 438/23843 | 0.958834 | 0.975151 | 0.960563 | Bcl10/Btn2  |
| GO_BP_m4GO:006075regulation 1/727  | 103/23843 | 0.959091 | 0.975205 | 0.960616 | Gas6        |
| GO_BP_m4GO:000695humoral ir6/727   | 352/23843 | 0.959358 | 0.975269 | 0.960678 | AY761184/   |
| GO_BP_m4GO:006157actin filamç2/727 | 162/23843 | 0.960062 | 0.975777 | 0.961179 | Eln/Synpo   |
| GO_BP_m4GO:00487Cembryonic 1/727   | 104/23843 | 0.960344 | 0.975823 | 0.961224 | Hoxa6       |
| GO_BP_m4GO:003032lung develç3/727  | 214/23843 | 0.960515 | 0.975823 | 0.961224 | Cyp1a2/Sp   |
| GO_BP_m4GO:00516Cprotein ma5/727   | 309/23843 | 0.960799 | 0.975904 | 0.961304 | Aga/Astl/Ei |

|                                    |           |          |          |          |             |
|------------------------------------|-----------|----------|----------|----------|-------------|
| GO_BP_m4GO:005086regulation 4/727  | 263/23843 | 0.961082 | 0.975984 | 0.961382 | Ighv9-4/II1 |
| GO_BP_m4GO:000182mesonephr1/727    | 105/23843 | 0.961558 | 0.976053 | 0.961451 | Ret         |
| GO_BP_m4GO:002195cerebral co1/727  | 105/23843 | 0.961558 | 0.976053 | 0.961451 | Rtn4        |
| GO_BP_m4GO:001652negative re1/727  | 106/23843 | 0.962736 | 0.976748 | 0.962136 | Spry2       |
| GO_BP_m4GO:004353blood vess1/727   | 106/23843 | 0.962736 | 0.976748 | 0.962136 | Efna1       |
| GO_BP_m4GO:004211B cell activ7/727 | 401/23843 | 0.962944 | 0.976748 | 0.962136 | Ifna12/Ighv |
| GO_BP_m4GO:006113regulation 2/727  | 165/23843 | 0.963061 | 0.976748 | 0.962136 | Aurka/Socs  |
| GO_BP_m4GO:009010positive re1/727  | 107/23843 | 0.963877 | 0.977298 | 0.962677 | Inhba       |
| GO_BP_m4GO:004352negative re2/727  | 166/23843 | 0.964011 | 0.977298 | 0.962677 | Itsn1/Mt1   |
| GO_BP_m4GO:000005G2/M tran1/727    | 108/23843 | 0.964983 | 0.977662 | 0.963035 | Hus1        |
| GO_BP_m4GO:000282positive re1/727  | 108/23843 | 0.964983 | 0.977662 | 0.963035 | Socs5       |
| GO_BP_m4GO:200027regulation 1/727  | 108/23843 | 0.964983 | 0.977662 | 0.963035 | C3ar1       |
| GO_BP_m4GO:004339regulation 3/727  | 220/23843 | 0.965656 | 0.977713 | 0.963085 | Aurka/Tian  |
| GO_BP_m4GO:005087positive re3/727  | 220/23843 | 0.965656 | 0.977713 | 0.963085 | Ighv9-4/II1 |
| GO_BP_m4GO:000177leukocyte t1/727  | 109/23843 | 0.966056 | 0.977713 | 0.963085 | Bcl10       |
| GO_BP_m4GO:190533regulation 1/727  | 109/23843 | 0.966056 | 0.977713 | 0.963085 | Ror2        |
| GO_BP_m4GO:200018negative re1/727  | 109/23843 | 0.966056 | 0.977713 | 0.963085 | Spry2       |
| GO_BP_m4GO:000705spindle org2/727  | 169/23843 | 0.966724 | 0.978182 | 0.963548 | Aurka/Rps3  |
| GO_BP_m4GO:004354protein acy3/727  | 222/23843 | 0.967225 | 0.978481 | 0.963842 | Nat8f1/Dr1  |
| GO_BP_m4GO:000761learning or4/727  | 272/23843 | 0.967896 | 0.978953 | 0.964307 | Ager/Esr2/  |
| GO_BP_m4GO:003050BMP signal2/727   | 171/23843 | 0.968423 | 0.979279 | 0.964628 | Fst/Ror2    |
| GO_BP_m4GO:004333response tr1/727  | 112/23843 | 0.969081 | 0.979737 | 0.965079 | Ifna12      |
| GO_BP_m4GO:000863apoptotic r1/727  | 113/23843 | 0.970028 | 0.980487 | 0.965818 | Wdr35       |
| GO_BP_m4GO:001063negative re6/727  | 369/23843 | 0.970499 | 0.980756 | 0.966083 | Nav3/Pid1/  |
| GO_BP_m4GO:001081positive re1/727  | 114/23843 | 0.970946 | 0.981    | 0.966324 | Vit         |
| GO_BP_m4GO:000705mitotic spir1/727 | 115/23843 | 0.971836 | 0.981692 | 0.967006 | Aurka       |
| GO_BP_m4GO:000827regulation 1/727  | 116/23843 | 0.972699 | 0.982149 | 0.967455 | Tmod2       |
| GO_BP_m4GO:190134negative re1/727  | 116/23843 | 0.972699 | 0.982149 | 0.967455 | Spry2       |
| GO_BP_m4GO:000647protein acc2/727  | 179/23843 | 0.974418 | 0.983677 | 0.96896  | Nat8f1/Dr1  |
| GO_BP_m4GO:005085B cell rece2/727  | 180/23843 | 0.975085 | 0.984142 | 0.969419 | Ighv9-4/Lc  |
| GO_BP_m4GO:000645protein folk2/727 | 181/23843 | 0.975736 | 0.984458 | 0.96973  | Dnajb14/Pj  |
| GO_BP_m4GO:000165urogenital 5/727  | 333/23843 | 0.975838 | 0.984458 | 0.96973  | C3ar1/Esr2  |
| GO_BP_m4GO:007177response tr2/727  | 182/23843 | 0.97637  | 0.984458 | 0.96973  | Fst/Ror2    |
| GO_BP_m4GO:007177cellular res2/727 | 182/23843 | 0.97637  | 0.984458 | 0.96973  | Fst/Ror2    |
| GO_BP_m4GO:000222pattern rec1/727  | 121/23843 | 0.976634 | 0.984458 | 0.96973  | Rela        |
| GO_BP_m4GO:000327cardiac sep1/727  | 121/23843 | 0.976634 | 0.984458 | 0.96973  | Nfatc1      |
| GO_BP_m4GO:000916nucleotide 1/727  | 122/23843 | 0.97735  | 0.984972 | 0.970237 | Nudt7       |
| GO_BP_m4GO:000275innate imm1/727   | 123/23843 | 0.978044 | 0.985391 | 0.970649 | Rela        |
| GO_BP_m4GO:007050regulation 2/727  | 185/23843 | 0.978177 | 0.985391 | 0.970649 | Nav3/Rps3   |
| GO_BP_m4GO:004483cell cycle G1/727 | 124/23843 | 0.978717 | 0.985595 | 0.97085  | Hus1        |
| GO_BP_m4GO:007200renal syste4/727  | 291/23843 | 0.978792 | 0.985595 | 0.97085  | C3ar1/Ret/  |
| GO_BP_m4GO:000691phagocyto2/727    | 187/23843 | 0.979307 | 0.985905 | 0.971156 | Ager/Ighv9  |
| GO_BP_m4GO:001081regulation 2/727  | 189/23843 | 0.98038  | 0.986778 | 0.972015 | Muc4/Vit    |
| GO_BP_m4GO:200125negative re1/727  | 128/23843 | 0.981209 | 0.987405 | 0.972632 | Trip12      |
| GO_BP_m4GO:006054respiratory 3/727 | 247/23843 | 0.981909 | 0.987902 | 0.973122 | Cyp1a2/Sp   |
| GO_BP_m4GO:001063positive re1/727  | 130/23843 | 0.982343 | 0.98813  | 0.973347 | Rtn4        |
| GO_BP_m4GO:000150skeletal sys8/727 | 490/23843 | 0.983481 | 0.989067 | 0.97427  | Fgf4/Fst/Hc |
| GO_BP_m4GO:009902plasma me2/727    | 196/23843 | 0.983727 | 0.98909  | 0.974293 | Ager/Ighv9  |

|                                       |           |          |          |          |              |
|---------------------------------------|-----------|----------|----------|----------|--------------|
| GO_BP_m4GO:004859camera-tyr1/727      | 133/23843 | 0.983918 | 0.98909  | 0.974293 | Cabp4        |
| GO_BP_m4GO:001569inorganic a1/727     | 134/23843 | 0.984411 | 0.989336 | 0.974535 | Car2         |
| GO_BP_m4GO:004508positive re2/727     | 198/23843 | 0.984576 | 0.989336 | 0.974535 | Rela/Sfpq    |
| GO_BP_m4GO:004870embryonic 1/727      | 136/23843 | 0.985352 | 0.989908 | 0.975098 | Hoxa6        |
| GO_BP_m4GO:001032membrane 2/727       | 203/23843 | 0.986516 | 0.990596 | 0.975776 | Ager/Ighv9   |
| GO_BP_m4GO:006024anatomical 5/727     | 361/23843 | 0.986548 | 0.990596 | 0.975776 | Car2/Cdh3    |
| GO_BP_m4GO:001657histone ac1/727      | 139/23843 | 0.986659 | 0.990596 | 0.975776 | Dr1          |
| GO_BP_m4GO:004219neurotrans 1/727     | 141/23843 | 0.987465 | 0.990989 | 0.976163 | Wdr35        |
| GO_BP_m4GO:007207kidney epit 1/727    | 141/23843 | 0.987465 | 0.990989 | 0.976163 | Ret          |
| GO_BP_m4GO:000739single fertil 1/727  | 142/23843 | 0.987849 | 0.991166 | 0.976338 | Astl         |
| GO_BP_m4GO:014001mitotic nuc 3/727    | 266/23843 | 0.988611 | 0.991723 | 0.976886 | Aurka/Rpl2   |
| GO_BP_m4GO:000182kidney dev 3/727     | 269/23843 | 0.989422 | 0.9923   | 0.977455 | C3ar1/Ret/   |
| GO_BP_m4GO:000007mitotic sist 1/727   | 147/23843 | 0.989602 | 0.9923   | 0.977455 | Spdl1        |
| GO_BP_m4GO:003105regulation 1/727     | 149/23843 | 0.99023  | 0.992722 | 0.97787  | Trip12       |
| GO_BP_m4GO:004599positive re1/727     | 153/23843 | 0.991376 | 0.993662 | 0.978796 | Anp32b       |
| GO_BP_m4GO:000691phagocyto:1/727      | 154/23843 | 0.99164  | 0.993719 | 0.978852 | Ighv9-4      |
| GO_BP_m4GO:001657histone mc6/727      | 437/23843 | 0.992441 | 0.994313 | 0.979438 | Dr1/Dydc1    |
| GO_BP_m4GO:000761learning 1/727       | 161/23843 | 0.993279 | 0.994944 | 0.980059 | Synpo        |
| GO_BP_m4GO:001656covalent ch6/727     | 449/23843 | 0.994125 | 0.995583 | 0.980688 | Dr1/Dydc1    |
| GO_BP_m4GO:005105positive re2/727     | 236/23843 | 0.99451  | 0.995638 | 0.980743 | C3ar1/Rps3   |
| GO_BP_m4GO:200125positive re1/727     | 168/23843 | 0.994597 | 0.995638 | 0.980743 | Sfpq         |
| GO_BP_m4GO:012009regulation 1/727     | 172/23843 | 0.995231 | 0.996064 | 0.981163 | Neurl1a      |
| GO_BP_m4GO:006049regulation 1/727     | 174/23843 | 0.995519 | 0.996144 | 0.981242 | Neurl1a      |
| GO_BP_m4GO:190227regulation 1/727     | 176/23843 | 0.99579  | 0.996207 | 0.981303 | Trip12       |
| GO_BP_m4GO:003304regulation 3/727     | 330/23843 | 0.997736 | 0.997745 | 0.982818 | Rmi2/Sfpq,   |
| GO_BP_m4GO:006034bone devel1/727      | 196/23843 | 0.997745 | 0.997745 | 0.982818 | Fgf4         |
| GO_CC_m1GO:000577peroxisom6/2589      | 142/23583 | 5.61E-05 | 0.030225 | 0.028481 | Abcd3/Aca    |
| GO_CC_m1GO:004257microbody 32/2589    | 142/23583 | 5.61E-05 | 0.030225 | 0.028481 | Abcd3/Aca    |
| GO_CC_m1GO:003099intraciliary 9/2589  | 22/23583  | 0.000298 | 0.107249 | 0.10106  | Ift172/Ift22 |
| GO_CC_m1GO:003099intraciliary 11/2589 | 34/23583  | 0.000706 | 0.149275 | 0.14066  | Ift172/Ift22 |
| GO_CC_m1GO:004308synaptic cl6/2589    | 12/23583  | 0.000894 | 0.149275 | 0.14066  | Ache/C1ql1   |
| GO_CC_m1GO:004443microbody 15/2589    | 57/23583  | 0.000969 | 0.149275 | 0.14066  | Abcd3/Acs    |
| GO_CC_m1GO:004443peroxisom15/2589     | 57/23583  | 0.000969 | 0.149275 | 0.14066  | Abcd3/Acs    |
| GO_CC_m1GO:003339chromatoic6/2589     | 14/23583  | 0.002392 | 0.293357 | 0.276428 | Arntl/Clock  |
| GO_CC_m1GO:000575mitochond 43/2589    | 253/23583 | 0.002449 | 0.293357 | 0.276428 | Dglucy/Abi   |
| GO_CC_m1GO:009885actin-base35/2589    | 199/23583 | 0.003339 | 0.294083 | 0.277112 | Abi1/Acpp,   |
| GO_CC_m1GO:003243actin filam18/2589   | 83/23583  | 0.003457 | 0.294083 | 0.277112 | Acta1/Acta   |
| GO_CC_m1GO:004521postsynapt 43/2589   | 258/23583 | 0.003551 | 0.294083 | 0.277112 | Abi1/Ache,   |
| GO_CC_m1GO:009957postsynapt 43/2589   | 258/23583 | 0.003551 | 0.294083 | 0.277112 | Adora1/Arl   |
| GO_CC_m1GO:003002lamellipodi 29/2589  | 160/23583 | 0.004603 | 0.294083 | 0.277112 | Abi1/Abi3/   |
| GO_CC_m1GO:000578endoplasm 71/2589    | 476/23583 | 0.004637 | 0.294083 | 0.277112 | Acer3/Akap   |
| GO_CC_m1GO:000577peroxisom11/2589     | 42/23583  | 0.004638 | 0.294083 | 0.277112 | Abcd3/Acs    |
| GO_CC_m1GO:003190microbody 11/2589    | 42/23583  | 0.004638 | 0.294083 | 0.277112 | Abcd3/Acs    |
| GO_CC_m1GO:000579rough end20/2589     | 100/23583 | 0.005647 | 0.295177 | 0.278143 | Ache/Adcy    |
| GO_CC_m1GO:009882endoplasm 72/2589    | 489/23583 | 0.005985 | 0.295177 | 0.278143 | Acer3/Akap   |
| GO_CC_m1GO:009706synaptic m52/2589    | 334/23583 | 0.00612  | 0.295177 | 0.278143 | Abi1/Ache,   |
| GO_CC_m1GO:004217nuclear out 73/2589  | 498/23583 | 0.006315 | 0.295177 | 0.278143 | Acer3/Akap   |
| GO_CC_m1GO:003227asymmetric 42/2589   | 260/23583 | 0.006843 | 0.295177 | 0.278143 | Adora1/Arl   |

|                   |                       |           |          |          |          |              |
|-------------------|-----------------------|-----------|----------|----------|----------|--------------|
| GO_CC_m1GO:007065 | HAUS com 4/2589       | 8/23583   | 0.007045 | 0.295177 | 0.278143 | Haus1/Hau    |
| GO_CC_m1GO:003146 | Cul3-RING 15/2589     | 70/23583  | 0.008107 | 0.295177 | 0.278143 | Btbd18/Glr   |
| GO_CC_m1GO:009898 | neuron to 42/2589     | 263/23583 | 0.00833  | 0.295177 | 0.278143 | Adora1/Arl   |
| GO_CC_m1GO:001406 | postsynapt 41/2589    | 256/23583 | 0.008628 | 0.295177 | 0.278143 | Adora1/Arl   |
| GO_CC_m1GO:001562 | actin cytosl 69/2589  | 474/23583 | 0.009055 | 0.295177 | 0.278143 | Abl2/Abra/   |
| GO_CC_m1GO:000565 | nuclear lan 5/2589    | 13/23583  | 0.009585 | 0.295177 | 0.278143 | Hlcs/Lbr/N   |
| GO_CC_m1GO:003194 | filamentou: 11/2589   | 46/23583  | 0.009604 | 0.295177 | 0.278143 | Fermt2/Fsc   |
| GO_CC_m1GO:001986 | organelle ir 68/2589  | 468/23583 | 0.009906 | 0.295177 | 0.278143 | 2010107E0    |
| GO_CC_m1GO:000578 | peroxisom: 6/2589     | 18/23583  | 0.010056 | 0.295177 | 0.278143 | Abcd3/Eci2   |
| GO_CC_m1GO:003104 | dense core 6/2589     | 18/23583  | 0.010056 | 0.295177 | 0.278143 | 1500015O:    |
| GO_CC_m1GO:003190 | microbody 6/2589      | 18/23583  | 0.010056 | 0.295177 | 0.278143 | Abcd3/Eci2   |
| GO_CC_m1GO:003586 | ciliary trans 15/2589 | 72/23583  | 0.010541 | 0.295177 | 0.278143 | B9d1/Cc2d    |
| GO_CC_m1GO:000582 | polar micrc 3/2589    | 5/23583   | 0.011139 | 0.295177 | 0.278143 | Klhl21/Klhl: |
| GO_CC_m1GO:003141 | NatA com: 3/2589      | 5/23583   | 0.011139 | 0.295177 | 0.278143 | Naa10/Naa:   |
| GO_CC_m1GO:007178 | LUBAC con 3/2589      | 5/23583   | 0.011139 | 0.295177 | 0.278143 | Park2/Rbck   |
| GO_CC_m1GO:003190 | endosome 2/2589       | 2/23583   | 0.012048 | 0.295177 | 0.278143 | Cd63/Pdlin   |
| GO_CC_m1GO:003650 | UFD1-NPL 2/2589       | 2/23583   | 0.012048 | 0.295177 | 0.278143 | Nploc4/Ufc   |
| GO_CC_m1GO:007058 | PCNA-p21 2/2589       | 2/23583   | 0.012048 | 0.295177 | 0.278143 | Cdkn1a/Pc    |
| GO_CC_m1GO:009712 | cyclin A1-C 2/2589    | 2/23583   | 0.012048 | 0.295177 | 0.278143 | Ccna1/Cdk    |
| GO_CC_m1GO:009713 | cyclin E1-C 2/2589    | 2/23583   | 0.012048 | 0.295177 | 0.278143 | Ccne1/Cdk    |
| GO_CC_m1GO:009713 | cyclin E2-C 2/2589    | 2/23583   | 0.012048 | 0.295177 | 0.278143 | Ccne2/Cdk    |
| GO_CC_m1GO:199066 | PCSK9-An: 2/2589      | 2/23583   | 0.012048 | 0.295177 | 0.278143 | Anxa2/Pcsl   |
| GO_CC_m1GO:003017 | filopodium 17/2589    | 87/23583  | 0.012817 | 0.298561 | 0.281331 | Abi1/Acpp.   |
| GO_CC_m1GO:000574 | mitochond 62/2589     | 426/23583 | 0.012848 | 0.298561 | 0.281331 | 2010107E0    |
| GO_CC_m1GO:000581 | centrosom: 71/2589    | 498/23583 | 0.013017 | 0.298561 | 0.281331 | Rtraf/B9d1.  |
| GO_CC_m1GO:000587 | microtubul 60/2589    | 412/23583 | 0.014016 | 0.314781 | 0.296615 | Bcas3/Cct3   |
| GO_CC_m1GO:003146 | cullin-RINC 32/2589   | 199/23583 | 0.01759  | 0.367131 | 0.345944 | Abtb1/Arih   |
| GO_CC_m1GO:003141 | N-terminal 4/2589     | 10/23583  | 0.017653 | 0.367131 | 0.345944 | Naa10/Naa:   |
| GO_CC_m1GO:004466 | MLL3/4 coi 4/2589     | 10/23583  | 0.017653 | 0.367131 | 0.345944 | Ash2l/Kdm    |
| GO_CC_m1GO:003013 | transport v 44/2589   | 291/23583 | 0.017709 | 0.367131 | 0.345944 | Adra1d/Ap    |
| GO_CC_m1GO:001632 | basolateral 35/2589   | 223/23583 | 0.019101 | 0.36772  | 0.346499 | Abcc3/Adc    |
| GO_CC_m1GO:004654 | U4/U6 x U: 7/2589     | 26/23583  | 0.019135 | 0.36772  | 0.346499 | Lsm5/Naa:    |
| GO_CC_m1GO:007097 | endoplasm 7/2589      | 26/23583  | 0.019135 | 0.36772  | 0.346499 | H2-Q2/Mi:    |
| GO_CC_m1GO:000015 | ubiquitin li: 50/2589 | 340/23583 | 0.019688 | 0.36772  | 0.346499 | Abtb1/Arih   |
| GO_CC_m1GO:003125 | cell leading 53/2589  | 364/23583 | 0.019969 | 0.36772  | 0.346499 | Abi1/Abi3/   |
| GO_CC_m1GO:000567 | transcripti 3/2589    | 6/23583   | 0.020467 | 0.36772  | 0.346499 | Gtf2a1/Gtf:  |
| GO_CC_m1GO:004435 | pinosome 3/2589       | 6/23583   | 0.020467 | 0.36772  | 0.346499 | Ankfy1/An:   |
| GO_CC_m1GO:004435 | macropino 3/2589      | 6/23583   | 0.020467 | 0.36772  | 0.346499 | Ankfy1/An:   |
| GO_CC_m1GO:003159 | neuromusc 14/2589     | 71/23583  | 0.020949 | 0.370212 | 0.348848 | Ache/Ascc:   |
| GO_CC_m1GO:004264 | actomyosin 16/2589    | 85/23583  | 0.021599 | 0.375538 | 0.353866 | Acta1/Acta   |
| GO_CC_m1GO:004485 | plasma me 20/2589     | 114/23583 | 0.023054 | 0.388763 | 0.366328 | Adcyap1r1.   |
| GO_CC_m1GO:009879 | presynapse 56/2589    | 391/23583 | 0.023081 | 0.388763 | 0.366328 | Ache/Ador    |
| GO_CC_m1GO:004319 | varicosity 5/2589     | 16/23583  | 0.024612 | 0.408166 | 0.384611 | Cadm1/Crf    |
| GO_CC_m1GO:000557 | proteinace: 52/2589   | 361/23583 | 0.025184 | 0.408166 | 0.384611 | 2300002M:    |
| GO_CC_m1GO:001711 | Golgi trans 4/2589    | 11/23583  | 0.025368 | 0.408166 | 0.384611 | Cog4/Cog:    |
| GO_CC_m1GO:000587 | spindle mic 11/2589   | 53/23583  | 0.026982 | 0.411609 | 0.387856 | Cdk1/Fam1    |
| GO_CC_m1GO:000210 | podosome 7/2589       | 28/23583  | 0.028387 | 0.411609 | 0.387856 | Adam8/Db     |
| GO_CC_m1GO:000571 | nuclear eur 7/2589    | 28/23583  | 0.028387 | 0.411609 | 0.387856 | Ash2l/H2af   |

|                   |              |         |           |          |          |          |             |
|-------------------|--------------|---------|-----------|----------|----------|----------|-------------|
| GO_CC_m1GO:000929 | nucleoid     | 10/2589 | 47/23583  | 0.029084 | 0.411609 | 0.387856 | Clpx/Dhx3C  |
| GO_CC_m1GO:004264 | mitochond    | 10/2589 | 47/23583  | 0.029084 | 0.411609 | 0.387856 | Clpx/Dhx3C  |
| GO_CC_m1GO:000172 | stress fiber | 14/2589 | 74/23583  | 0.029149 | 0.411609 | 0.387856 | Acta1/Acta  |
| GO_CC_m1GO:009751 | contractile  | 14/2589 | 74/23583  | 0.029149 | 0.411609 | 0.387856 | Acta1/Acta  |
| GO_CC_m1GO:003196 | nuclear me   | 36/2589 | 238/23583 | 0.029387 | 0.411609 | 0.387856 | Ahctf1/Aka  |
| GO_CC_m1GO:004329 | contractile  | 34/2589 | 223/23583 | 0.030256 | 0.411609 | 0.387856 | Abra/Acta1  |
| GO_CC_m1GO:000560 | basement r   | 18/2589 | 103/23583 | 0.031023 | 0.411609 | 0.387856 | Ache/Adan   |
| GO_CC_m1GO:003243 | filopodium   | 5/2589  | 17/23583  | 0.031793 | 0.411609 | 0.387856 | Abi1/Cib1/  |
| GO_CC_m1GO:003197 | organelle e  | 15/2589 | 82/23583  | 0.032274 | 0.411609 | 0.387856 | Aifm1/Alox  |
| GO_CC_m1GO:000581 | lipid dropl  | 14/2589 | 75/23583  | 0.032344 | 0.411609 | 0.387856 | Adig/Aifm2  |
| GO_CC_m1GO:004461 | nuclear poi  | 3/2589  | 7/23583   | 0.032924 | 0.411609 | 0.387856 | Nup153/Pc   |
| GO_CC_m1GO:000080 | transverse   | 2/2589  | 3/23583   | 0.033501 | 0.411609 | 0.387856 | Sycp1/Sycp  |
| GO_CC_m1GO:003109 | platelet alp | 2/2589  | 3/23583   | 0.033501 | 0.411609 | 0.387856 | Snca/Sparc  |
| GO_CC_m1GO:004439 | microspike   | 2/2589  | 3/23583   | 0.033501 | 0.411609 | 0.387856 | Ezr/Fscn1   |
| GO_CC_m1GO:009714 | centralspin  | 2/2589  | 3/23583   | 0.033501 | 0.411609 | 0.387856 | Kif23/Racg  |
| GO_CC_m1GO:009718 | serine prot  | 2/2589  | 3/23583   | 0.033501 | 0.411609 | 0.387856 | Klk8/Serpir |
| GO_CC_m1GO:199045 | Parkin-FBX   | 2/2589  | 3/23583   | 0.033501 | 0.411609 | 0.387856 | Cul1/Park2  |
| GO_CC_m1GO:000031 | organellar   | 7/2589  | 29/23583  | 0.033983 | 0.411609 | 0.387856 | Mrpl42/Mr   |
| GO_CC_m1GO:000576 | mitochond    | 7/2589  | 29/23583  | 0.033983 | 0.411609 | 0.387856 | Mrpl42/Mr   |
| GO_CC_m1GO:003577 | ribonucleo   | 29/2589 | 188/23583 | 0.03741  | 0.44809  | 0.422231 | Arntl/Noct  |
| GO_CC_m1GO:006169 | transferase  | 40/2589 | 275/23583 | 0.039335 | 0.465969 | 0.439078 | Ccna1/Ccn   |
| GO_CC_m1GO:004429 | dendrite te  | 5/2589  | 18/23583  | 0.040153 | 0.469541 | 0.442444 | Cdkl5/Fmr1  |
| GO_CC_m1GO:003326 | axon part    | 60/2589 | 437/23583 | 0.040671 | 0.469541 | 0.442444 | Aatk/Adora  |
| GO_CC_m1GO:000208 | acrosomal    | 6/2589  | 24/23583  | 0.041239 | 0.469541 | 0.442444 | Cav1/Ccdc   |
| GO_CC_m1GO:003013 | COPII-coat   | 10/2589 | 50/23583  | 0.042781 | 0.469541 | 0.442444 | Pcsk9/Pdcc  |
| GO_CC_m1GO:004444 | contractile  | 30/2589 | 199/23583 | 0.045229 | 0.469541 | 0.442444 | Abra/Acta1  |
| GO_CC_m1GO:000590 | caveola      | 16/2589 | 93/23583  | 0.04568  | 0.469541 | 0.442444 | Adcyap1r1.  |
| GO_CC_m1GO:000564 | nuclear env  | 4/2589  | 13/23583  | 0.046026 | 0.469541 | 0.442444 | Alox5/Bche  |
| GO_CC_m1GO:004258 | specific gr  | 4/2589  | 13/23583  | 0.046026 | 0.469541 | 0.442444 | Adam8/An    |
| GO_CC_m1GO:009893 | intrinsic co | 4/2589  | 13/23583  | 0.046026 | 0.469541 | 0.442444 | Adora1/Cd   |
| GO_CC_m1GO:009905 | integral co  | 4/2589  | 13/23583  | 0.046026 | 0.469541 | 0.442444 | Adora1/Cd   |
| GO_CC_m1GO:009924 | intrinsic co | 4/2589  | 13/23583  | 0.046026 | 0.469541 | 0.442444 | Adora1/Cd   |
| GO_CC_m1GO:009969 | integral co  | 4/2589  | 13/23583  | 0.046026 | 0.469541 | 0.442444 | Adora1/Cd   |
| GO_CC_m1GO:199012 | messenger    | 4/2589  | 13/23583  | 0.046026 | 0.469541 | 0.442444 | Cpeb3/Cpe   |
| GO_CC_m1GO:000030 | cyclin-dep   | 9/2589  | 44/23583  | 0.046805 | 0.469541 | 0.442444 | Ccna1/Ccn   |
| GO_CC_m1GO:000579 | Golgi-asso   | 20/2589 | 123/23583 | 0.047058 | 0.469541 | 0.442444 | Copg2/Igf2  |
| GO_CC_m1GO:009752 | spliceosom   | 7/2589  | 31/23583  | 0.047257 | 0.469541 | 0.442444 | Lsm5/Naa3   |
| GO_CC_m1GO:003122 | anchored c   | 26/2589 | 169/23583 | 0.048005 | 0.469541 | 0.442444 | Ache/Alpl/  |
| GO_CC_m1GO:000598 | cAMP-dep     | 3/2589  | 8/23583   | 0.048452 | 0.469541 | 0.442444 | Akap14/Prl  |
| GO_CC_m1GO:003409 | VCP-NPL4     | 3/2589  | 8/23583   | 0.048452 | 0.469541 | 0.442444 | Cav1/Nplo   |
| GO_CC_m1GO:003001 | sarcomere    | 28/2589 | 185/23583 | 0.049457 | 0.469541 | 0.442444 | Abra/Acta1  |
| GO_CC_m1GO:003109 | platelet alp | 5/2589  | 19/23583  | 0.049723 | 0.469541 | 0.442444 | Igfbp3/Snc  |
| GO_CC_m1GO:004423 | organelle r  | 5/2589  | 19/23583  | 0.049723 | 0.469541 | 0.442444 | Canx/Pik3r  |
| GO_CC_m1GO:000079 | euchromat    | 8/2589  | 38/23583  | 0.050941 | 0.469541 | 0.442444 | Ash2l/H2af  |
| GO_CC_m1GO:000080 | sex chrom    | 8/2589  | 38/23583  | 0.050941 | 0.469541 | 0.442444 | Atr/Cdk2/E  |
| GO_CC_m1GO:009754 | ciliary base | 8/2589  | 38/23583  | 0.050941 | 0.469541 | 0.442444 | Cfap36/Ift5 |
| GO_CC_m1GO:003001 | myofibril    | 31/2589 | 209/23583 | 0.050961 | 0.469541 | 0.442444 | Abra/Acta1  |
| GO_CC_m1GO:003646 | cytoplasm    | 17/2589 | 178/23583 | 0.05172  | 0.472491 | 0.445224 | Arntl/Noct  |

|                   |                      |           |          |          |          |              |
|-------------------|----------------------|-----------|----------|----------|----------|--------------|
| GO_CC_m1GO:015003 | distal axon 50/2589  | 364/23583 | 0.056831 | 0.507866 | 0.478557 | Aatk/Adora   |
| GO_CC_m1GO:001652 | sarcoplasm 13/2589   | 74/23583  | 0.058306 | 0.507866 | 0.478557 | Akap6/Art1   |
| GO_CC_m1GO:003603 | MKS comp 4/2589      | 14/23583  | 0.059004 | 0.507866 | 0.478557 | B9d1/Cc2d    |
| GO_CC_m1GO:007143 | invadopod 4/2589     | 14/23583  | 0.059004 | 0.507866 | 0.478557 | Ezr/Fscn1l   |
| GO_CC_m1GO:003014 | secretory g 54/2589  | 398/23583 | 0.059542 | 0.507866 | 0.478557 | 1500015O:    |
| GO_CC_m1GO:001250 | ER to Golgi 5/2589   | 20/23583  | 0.060516 | 0.507866 | 0.478557 | Pdcd6/Sec:   |
| GO_CC_m1GO:000563 | nuclear en 54/2589   | 399/23583 | 0.061769 | 0.507866 | 0.478557 | 1700123L1    |
| GO_CC_m1GO:000021 | tRNA-intro 2/2589    | 4/23583   | 0.062149 | 0.507866 | 0.478557 | Tsen2/Tser   |
| GO_CC_m1GO:000032 | storage vac 2/2589   | 4/23583   | 0.062149 | 0.507866 | 0.478557 | Arhgef7/St   |
| GO_CC_m1GO:000575 | mitochond 2/2589     | 4/23583   | 0.062149 | 0.507866 | 0.478557 | Spq7/Vdac    |
| GO_CC_m1GO:007087 | SOSS com 2/2589      | 4/23583   | 0.062149 | 0.507866 | 0.478557 | Nabp1/Nal    |
| GO_CC_m1GO:009717 | protease in 2/2589   | 4/23583   | 0.062149 | 0.507866 | 0.478557 | Klk8/Serpir  |
| GO_CC_m1GO:190409 | peptidase i 2/2589   | 4/23583   | 0.062149 | 0.507866 | 0.478557 | Klk8/Serpir  |
| GO_CC_m1GO:009856 | cytoplasmic 29/2589  | 197/23583 | 0.062188 | 0.507866 | 0.478557 | Abl2/Cdh1.   |
| GO_CC_m1GO:003167 | band 21/2589         | 135/23583 | 0.063507 | 0.514737 | 0.485032 | Ahnak2/Ar    |
| GO_CC_m1GO:000193 | female pro 3/2589    | 9/23583   | 0.066884 | 0.526288 | 0.495916 | Slc2a1/Tbp   |
| GO_CC_m1GO:001977 | proteasom 3/2589     | 9/23583   | 0.066884 | 0.526288 | 0.495916 | Pma3/Psn     |
| GO_CC_m1GO:004432 | endoplasm 3/2589     | 9/23583   | 0.066884 | 0.526288 | 0.495916 | Calr/Canx1   |
| GO_CC_m1GO:012010 | centriolar s 3/2589  | 9/23583   | 0.066884 | 0.526288 | 0.495916 | Ccdc68/Cn    |
| GO_CC_m1GO:000588 | actin filam 19/2589  | 121/23583 | 0.06927  | 0.537934 | 0.50689  | Acta1/Aif1   |
| GO_CC_m1GO:004442 | extracellula 20/2589 | 129/23583 | 0.070756 | 0.537934 | 0.50689  | Ache/Adan    |
| GO_CC_m1GO:009858 | membrane 49/2589     | 362/23583 | 0.071945 | 0.537934 | 0.50689  | Adcyap1r1.   |
| GO_CC_m1GO:000174 | XY body 5/2589       | 21/23583  | 0.072528 | 0.537934 | 0.50689  | Atr/Dmrtc2   |
| GO_CC_m1GO:000566 | DNA replic 4/2589    | 15/23583  | 0.073709 | 0.537934 | 0.50689  | Ercc5/Prpf1  |
| GO_CC_m1GO:003146 | Cul2-RING 4/2589     | 15/23583  | 0.073709 | 0.537934 | 0.50689  | Cul2/Glmn.   |
| GO_CC_m1GO:003001 | Z disc 19/2589       | 122/23583 | 0.073979 | 0.537934 | 0.50689  | Ahnak2/At    |
| GO_CC_m1GO:003101 | extracellula 59/2589 | 447/23583 | 0.077542 | 0.537934 | 0.50689  | 2300002M:    |
| GO_CC_m1GO:003066 | secretory g 14/2589  | 85/23583  | 0.07912  | 0.537934 | 0.50689  | Abca3/Ada    |
| GO_CC_m1GO:000583 | heterotrim 7/2589    | 35/23583  | 0.082593 | 0.537934 | 0.50689  | Gnai1/Gnb    |
| GO_CC_m1GO:190536 | GTPase cor 7/2589    | 35/23583  | 0.082593 | 0.537934 | 0.50689  | Gnai1/Gnb    |
| GO_CC_m1GO:000572 | nuclear het 8/2589   | 42/23583  | 0.083568 | 0.537934 | 0.50689  | Cenpa/Cer    |
| GO_CC_m1GO:004512 | membrane 47/2589     | 350/23583 | 0.0848   | 0.537934 | 0.50689  | Adcyap1r1.   |
| GO_CC_m1GO:009885 | membrane 47/2589     | 350/23583 | 0.0848   | 0.537934 | 0.50689  | Adcyap1r1.   |
| GO_CC_m1GO:000016 | protein ph 3/2589    | 10/23583  | 0.087984 | 0.537934 | 0.50689  | 2810408A1    |
| GO_CC_m1GO:001660 | flotillin con 3/2589 | 10/23583  | 0.087984 | 0.537934 | 0.50689  | Cdh1/Flot2   |
| GO_CC_m1GO:004429 | dendritic g 3/2589   | 10/23583  | 0.087984 | 0.537934 | 0.50689  | Cdkl5/Fmr1   |
| GO_CC_m1GO:004524 | dihydrolip 3/2589    | 10/23583  | 0.087984 | 0.537934 | 0.50689  | Bckdhd/Ka    |
| GO_CC_m1GO:009754 | ciliary tip 3/2589   | 10/23583  | 0.087984 | 0.537934 | 0.50689  | Ift52/Ift88/ |
| GO_CC_m1GO:003439 | nuclear per 18/2589  | 117/23583 | 0.088051 | 0.537934 | 0.50689  | Ahctf1/Alo:  |
| GO_CC_m1GO:000563 | integral coi 4/2589  | 16/23583  | 0.090075 | 0.537934 | 0.50689  | Lbr/Lemd2    |
| GO_CC_m1GO:003122 | intrinsic co 4/2589  | 16/23583  | 0.090075 | 0.537934 | 0.50689  | Lbr/Lemd2    |
| GO_CC_m1GO:004259 | lamellar bc 4/2589   | 16/23583  | 0.090075 | 0.537934 | 0.50689  | Abca12/Ak    |
| GO_CC_m1GO:009879 | mitochond 36/2589    | 262/23583 | 0.093116 | 0.537934 | 0.50689  | 2010107E0    |
| GO_CC_m1GO:000580 | cis-Golgi n 8/2589   | 43/23583  | 0.093279 | 0.537934 | 0.50689  | Bok/Ctgf/C   |
| GO_CC_m1GO:009863 | protein cor 7/2589   | 36/23583  | 0.093287 | 0.537934 | 0.50689  | Cd80/Ctla4   |
| GO_CC_m1GO:001652 | sarcoplasm 11/2589   | 65/23583  | 0.095551 | 0.537934 | 0.50689  | Akap6/Art1   |
| GO_CC_m1GO:000166 | acrosomal 20/2589    | 134/23583 | 0.095846 | 0.537934 | 0.50689  | 1700016DC    |
| GO_CC_m1GO:190255 | serine/thre 13/2589  | 80/23583  | 0.095941 | 0.537934 | 0.50689  | Ccna1/Ccn    |

|                                             |           |          |          |         |              |
|---------------------------------------------|-----------|----------|----------|---------|--------------|
| GO_CC_m1GO:00100C cytoplasmic 2/2589        | 5/23583   | 0.096156 | 0.537934 | 0.50689 | Rab5a/Rbs    |
| GO_CC_m1GO:00304E smooth mt 2/2589          | 5/23583   | 0.096156 | 0.537934 | 0.50689 | Acta2/Npn    |
| GO_CC_m1GO:00427E GPI-anchored 2/2589       | 5/23583   | 0.096156 | 0.537934 | 0.50689 | Pigs/Pigu    |
| GO_CC_m1GO:004454 NSL complex 2/2589        | 5/23583   | 0.096156 | 0.537934 | 0.50689 | Kans1/Kan    |
| GO_CC_m1GO:007154 piP-body 2/2589           | 5/23583   | 0.096156 | 0.537934 | 0.50689 | Ddx4/Mael    |
| GO_CC_m1GO:00985E deuterosome 2/2589        | 5/23583   | 0.096156 | 0.537934 | 0.50689 | Deup1/Plk4   |
| GO_CC_m1GO:00988E intrinsic coil 2/2589     | 5/23583   | 0.096156 | 0.537934 | 0.50689 | Adora1/Cd    |
| GO_CC_m1GO:00990E integral coil 2/2589      | 5/23583   | 0.096156 | 0.537934 | 0.50689 | Adora1/Cd    |
| GO_CC_m1GO:00198E extrinsic coil 40/2589    | 296/23583 | 0.097489 | 0.537934 | 0.50689 | Abl2/Anxa2   |
| GO_CC_m1GO:00098E cytoplasmic 26/2589       | 182/23583 | 0.097541 | 0.537934 | 0.50689 | Abl2/Cdh1    |
| GO_CC_m1GO:00056E U5 snRNP 5/2589           | 23/23583  | 0.100114 | 0.537934 | 0.50689 | Naa38/Prp    |
| GO_CC_m1GO:00058E proteasome 5/2589         | 23/23583  | 0.100114 | 0.537934 | 0.50689 | Psm3/Psn     |
| GO_CC_m1GO:00309C retromer core 5/2589      | 23/23583  | 0.100114 | 0.537934 | 0.50689 | Ankfy1/Dei   |
| GO_CC_m1GO:004512 pronucleus 5/2589         | 23/23583  | 0.100114 | 0.537934 | 0.50689 | Blm/Hnrnp    |
| GO_CC_m1GO:00443C main axon 13/2589         | 81/23583  | 0.103389 | 0.537934 | 0.50689 | Adora1/Ca    |
| GO_CC_m1GO:003014 trans-Golgi 6/2589        | 30/23583  | 0.104019 | 0.537934 | 0.50689 | Igf2r/Ldlra7 |
| GO_CC_m1GO:00056E transcriptic 7/2589       | 37/23583  | 0.104714 | 0.537934 | 0.50689 | Gtf2a1/Gtf   |
| GO_CC_m1GO:00996E postsynaptic 7/2589       | 37/23583  | 0.104714 | 0.537934 | 0.50689 | Cacng5/Ca    |
| GO_CC_m1GO:000031 organellar 14/2589        | 89/23583  | 0.106145 | 0.537934 | 0.50689 | Mrpl10/Mr    |
| GO_CC_m1GO:00057E mitochondria 14/2589      | 89/23583  | 0.106145 | 0.537934 | 0.50689 | Mrpl10/Mr    |
| GO_CC_m1GO:00319E Golgi cisterna 10/2589    | 59/23583  | 0.107747 | 0.537934 | 0.50689 | Acpp/Bcap    |
| GO_CC_m1GO:00444E nuclear membrane 4/2589   | 17/23583  | 0.108008 | 0.537934 | 0.50689 | Lbr/Lemd2    |
| GO_CC_m1GO:00444E cytoplasmic 61/2589       | 475/23583 | 0.109363 | 0.537934 | 0.50689 | 3110002H1    |
| GO_CC_m1GO:00055E collagen type 1/2589      | 1/23583   | 0.109782 | 0.537934 | 0.50689 | Dcn          |
| GO_CC_m1GO:000561 cell wall 1/2589          | 1/23583   | 0.109782 | 0.537934 | 0.50689 | Pgghg        |
| GO_CC_m1GO:00058E steroid hormone 1/2589    | 1/23583   | 0.109782 | 0.537934 | 0.50689 | Sra1         |
| GO_CC_m1GO:000862 CHRAC 1/2589              | 1/23583   | 0.109782 | 0.537934 | 0.50689 | Baz1a        |
| GO_CC_m1GO:000984 mitochondria 1/2589       | 1/23583   | 0.109782 | 0.537934 | 0.50689 | Clpx         |
| GO_CC_m1GO:001711 single-strand 1/2589      | 1/23583   | 0.109782 | 0.537934 | 0.50689 | Helq         |
| GO_CC_m1GO:00310C actin rod 1/2589          | 1/23583   | 0.109782 | 0.537934 | 0.50689 | Cfl1         |
| GO_CC_m1GO:00319C early endosome 1/2589     | 1/23583   | 0.109782 | 0.537934 | 0.50689 | Pdlim4       |
| GO_CC_m1GO:0032144-aminobiosynthesis 1/2589 | 1/23583   | 0.109782 | 0.537934 | 0.50689 | Abat         |
| GO_CC_m1GO:003467 integrin alpha 1/2589     | 1/23583   | 0.109782 | 0.537934 | 0.50689 | Itga6        |
| GO_CC_m1GO:003467 integrin alpha 1/2589     | 1/23583   | 0.109782 | 0.537934 | 0.50689 | Npnt         |
| GO_CC_m1GO:003477 recycling endosome 1/2589 | 1/23583   | 0.109782 | 0.537934 | 0.50689 | Pdlim4       |
| GO_CC_m1GO:003557 specific granule 1/2589   | 1/23583   | 0.109782 | 0.537934 | 0.50689 | Vamp1        |
| GO_CC_m1GO:0043546-phosphorylation 1/2589   | 1/23583   | 0.109782 | 0.537934 | 0.50689 | Pfkfb1       |
| GO_CC_m1GO:00441E nucleoplasm 1/2589        | 1/23583   | 0.109782 | 0.537934 | 0.50689 | Myc          |
| GO_CC_m1GO:006182 basal tubule 1/2589       | 1/23583   | 0.109782 | 0.537934 | 0.50689 | Dnm3         |
| GO_CC_m1GO:007042 DNA ligase 1/2589         | 1/23583   | 0.109782 | 0.537934 | 0.50689 | Lig3         |
| GO_CC_m1GO:007044 integrin alpha 1/2589     | 1/23583   | 0.109782 | 0.537934 | 0.50689 | Tspan32      |
| GO_CC_m1GO:00715E nucleus-variant 1/2589    | 1/23583   | 0.109782 | 0.537934 | 0.50689 | Pik3r4       |
| GO_CC_m1GO:00725E box H/ACA 1/2589          | 1/23583   | 0.109782 | 0.537934 | 0.50689 | Nop10        |
| GO_CC_m1GO:00906E apical cytoplasm 1/2589   | 1/23583   | 0.109782 | 0.537934 | 0.50689 | Myo7b        |
| GO_CC_m1GO:00907E cofilin-actin 1/2589      | 1/23583   | 0.109782 | 0.537934 | 0.50689 | Cfl1         |
| GO_CC_m1GO:009864 collagen beta 1/2589      | 1/23583   | 0.109782 | 0.537934 | 0.50689 | Dcn          |
| GO_CC_m1GO:009894 intrinsic coil 1/2589     | 1/23583   | 0.109782 | 0.537934 | 0.50689 | Cdh2         |
| GO_CC_m1GO:00989E neuronal dendrite 1/2589  | 1/23583   | 0.109782 | 0.537934 | 0.50689 | Scg2         |



|                   |                |         |           |          |          |          |             |
|-------------------|----------------|---------|-----------|----------|----------|----------|-------------|
| GO_CC_m1GO:009905 | integral coi   | 1/2589  | 1/23583   | 0.109782 | 0.537934 | 0.50689  | Cdh2        |
| GO_CC_m1GO:009957 | glutamater     | 1/2589  | 1/23583   | 0.109782 | 0.537934 | 0.50689  | Camk2a      |
| GO_CC_m1GO:199082 | nucleoplası    | 1/2589  | 1/23583   | 0.109782 | 0.537934 | 0.50689  | Hnrnpc      |
| GO_CC_m1GO:199084 | subsarcoleı    | 1/2589  | 1/23583   | 0.109782 | 0.537934 | 0.50689  | Ppargc1a    |
| GO_CC_m1GO:199084 | interfibrillaı | 1/2589  | 1/23583   | 0.109782 | 0.537934 | 0.50689  | Ppargc1a    |
| GO_CC_m1GO:199087 | nucleoplası    | 1/2589  | 1/23583   | 0.109782 | 0.537934 | 0.50689  | Nup153      |
| GO_CC_m1GO:004461 | nuclear poi    | 3/2589  | 11/23583  | 0.111464 | 0.543704 | 0.512327 | Nup153/Ni   |
| GO_CC_m1GO:003301 | sarcoplasm     | 5/2589  | 24/23583  | 0.115608 | 0.561374 | 0.528977 | Akap6/Dhr   |
| GO_CC_m1GO:004367 | axon termii    | 27/2589 | 194/23583 | 0.117139 | 0.566258 | 0.53358  | Adora1/Cd   |
| GO_CC_m1GO:004238 | sarcolemm      | 22/2589 | 154/23583 | 0.119493 | 0.575061 | 0.541875 | Ahnak2/Ak   |
| GO_CC_m1GO:000802 | synaptic ve    | 27/2589 | 195/23583 | 0.122442 | 0.58483  | 0.551079 | Adra1d/Ca   |
| GO_CC_m1GO:000566 | DNA-direc      | 4/2589  | 18/23583  | 0.127395 | 0.58483  | 0.551079 | Polr2f/Polr |
| GO_CC_m1GO:001658 | NuRD com       | 4/2589  | 18/23583  | 0.127395 | 0.58483  | 0.551079 | Appl1/Hda   |
| GO_CC_m1GO:009054 | CHD-type       | 4/2589  | 18/23583  | 0.127395 | 0.58483  | 0.551079 | Appl1/Hda   |
| GO_CC_m1GO:000590 | microvillus    | 14/2589 | 92/23583  | 0.129647 | 0.58483  | 0.551079 | Aoc3/Bbs2   |
| GO_CC_m1GO:001250 | vesicle mer    | 40/2589 | 304/23583 | 0.13007  | 0.58483  | 0.551079 | Abca3/Acp   |
| GO_CC_m1GO:007038 | exocytic ve    | 29/2589 | 213/23583 | 0.131177 | 0.58483  | 0.551079 | Adra1d/Ca   |
| GO_CC_m1GO:000575 | mitochond      | 11/2589 | 69/23583  | 0.131316 | 0.58483  | 0.551079 | Aifm1/Chcl  |
| GO_CC_m1GO:000578 | endoplasm      | 9/2589  | 54/23583  | 0.132776 | 0.58483  | 0.551079 | Ache/Bche.  |
| GO_CC_m1GO:003049 | midbody        | 19/2589 | 132/23583 | 0.13282  | 0.58483  | 0.551079 | Anxa2/BC0   |
| GO_CC_m1GO:000040 | EKC/KEOP       | 2/2589  | 6/23583   | 0.134001 | 0.58483  | 0.551079 | Osgep1/Tr   |
| GO_CC_m1GO:000092 | equatorial     | 2/2589  | 6/23583   | 0.134001 | 0.58483  | 0.551079 | Tubgcp2/T   |
| GO_CC_m1GO:003089 | VCB compl      | 2/2589  | 6/23583   | 0.134001 | 0.58483  | 0.551079 | Cul2/Elob   |
| GO_CC_m1GO:003258 | multivesicu    | 2/2589  | 6/23583   | 0.134001 | 0.58483  | 0.551079 | Cd63/Rab2   |
| GO_CC_m1GO:003316 | melanoson      | 2/2589  | 6/23583   | 0.134001 | 0.58483  | 0.551079 | Rab32/Th    |
| GO_CC_m1GO:003574 | myelin she.    | 2/2589  | 6/23583   | 0.134001 | 0.58483  | 0.551079 | Anxa2/Stx4  |
| GO_CC_m1GO:004500 | chitosome      | 2/2589  | 6/23583   | 0.134001 | 0.58483  | 0.551079 | Rab32/Th    |
| GO_CC_m1GO:007076 | pre-snoRN      | 2/2589  | 6/23583   | 0.134001 | 0.58483  | 0.551079 | Nop56/Taf   |
| GO_CC_m1GO:009074 | pigment gr     | 2/2589  | 6/23583   | 0.134001 | 0.58483  | 0.551079 | Rab32/Th    |
| GO_CC_m1GO:009734 | ripiptoson     | 2/2589  | 6/23583   | 0.134001 | 0.58483  | 0.551079 | Casp8/Ripk  |
| GO_CC_m1GO:009758 | transcripti    | 2/2589  | 6/23583   | 0.134001 | 0.58483  | 0.551079 | Gtf2h3/Tbq  |
| GO_CC_m1GO:009894 | intrinsic co   | 2/2589  | 6/23583   | 0.134001 | 0.58483  | 0.551079 | Cdh2/Gria1  |
| GO_CC_m1GO:009906 | integral coi   | 2/2589  | 6/23583   | 0.134001 | 0.58483  | 0.551079 | Cdh2/Gria1  |
| GO_CC_m1GO:004443 | Golgi appa     | 60/2589 | 474/23583 | 0.134731 | 0.585645 | 0.551848 | Acer3/Acp1  |
| GO_CC_m1GO:000567 | holo TFIIH     | 3/2589  | 12/23583  | 0.137014 | 0.586118 | 0.552293 | Cdk7/Ercc5  |
| GO_CC_m1GO:000584 | mRNA cap       | 3/2589  | 12/23583  | 0.137014 | 0.586118 | 0.552293 | Eif4e/Fmr1  |
| GO_CC_m1GO:003451 | RNA cap b      | 3/2589  | 12/23583  | 0.137014 | 0.586118 | 0.552293 | Eif4e/Fmr1  |
| GO_CC_m1GO:004818 | Set1C/CON      | 3/2589  | 12/23583  | 0.137014 | 0.586118 | 0.552293 | Ash2l/Rbbp  |
| GO_CC_m1GO:000576 | early endo     | 32/2589 | 239/23583 | 0.13772  | 0.586806 | 0.552942 | Angptl3/Ar  |
| GO_CC_m1GO:190291 | protein kin    | 16/2589 | 109/23583 | 0.139768 | 0.590647 | 0.556562 | Ccna1/Ccn   |
| GO_CC_m1GO:000566 | transcripti    | 51/2589 | 399/23583 | 0.140287 | 0.590647 | 0.556562 | Ankrd1/Arr  |
| GO_CC_m1GO:000093 | P-body         | 11/2589 | 70/23583  | 0.141259 | 0.590647 | 0.556562 | Noct/Eif4e  |
| GO_CC_m1GO:009057 | RNA polyr      | 22/2589 | 158/23583 | 0.14487  | 0.590647 | 0.556562 | Ascl3/Cdk7  |
| GO_CC_m1GO:003065 | cytoplasmic    | 36/2589 | 274/23583 | 0.146428 | 0.590647 | 0.556562 | Abca3/Ada   |
| GO_CC_m1GO:004479 | nuclear tra    | 26/2589 | 191/23583 | 0.146512 | 0.590647 | 0.556562 | Ascl3/Cdk7  |
| GO_CC_m1GO:003470 | methyltran     | 14/2589 | 94/23583  | 0.14682  | 0.590647 | 0.556562 | Virma/Ash2  |
| GO_CC_m1GO:000592 | gap juncti     | 6/2589  | 33/23583  | 0.147364 | 0.590647 | 0.556562 | Des/Gja3/C  |
| GO_CC_m1GO:003069 | 90S prerib     | 6/2589  | 33/23583  | 0.147364 | 0.590647 | 0.556562 | Bms1/Casp   |

|                   |               |         |           |          |          |          |            |
|-------------------|---------------|---------|-----------|----------|----------|----------|------------|
| GO_CC_m1GO:003280 | neuron        | 6/2589  | 33/23583  | 0.147364 | 0.590647 | 0.556562 | Gabra6/Kc  |
| GO_CC_m1GO:001659 | DNA-direc     | 16/2589 | 110/23583 | 0.147853 | 0.590647 | 0.556562 | Cdk7/Ercc5 |
| GO_CC_m1GO:000093 | gamma-tu      | 4/2589  | 19/23583  | 0.148108 | 0.590647 | 0.556562 | Pde4b/Tub  |
| GO_CC_m1GO:003031 | T-tubule      | 10/2589 | 63/23583  | 0.148539 | 0.590647 | 0.556562 | Ahnak2/Ak  |
| GO_CC_m1GO:003242 | stereociliu   | 8/2589  | 48/23583  | 0.150843 | 0.590647 | 0.556562 | Atp8b1/Bb  |
| GO_CC_m1GO:004429 | cell-cell co  | 12/2589 | 79/23583  | 0.153682 | 0.590647 | 0.556562 | Akap6/Cav  |
| GO_CC_m1GO:009722 | sperm part    | 32/2589 | 242/23583 | 0.153958 | 0.590647 | 0.556562 | 1700016DC  |
| GO_CC_m1GO:000592 | focal adhe    | 19/2589 | 135/23583 | 0.154646 | 0.590647 | 0.556562 | Aif1/Arhge |
| GO_CC_m1GO:005502 | nuclear DN    | 19/2589 | 135/23583 | 0.154646 | 0.590647 | 0.556562 | Cd3eap/Cc  |
| GO_CC_m1GO:007268 | mitotic spir  | 14/2589 | 95/23583  | 0.155846 | 0.590647 | 0.556562 | Rtraf/Cdc7 |
| GO_CC_m1GO:003065 | transport v   | 17/2589 | 119/23583 | 0.155893 | 0.590647 | 0.556562 | Adra1d/Ldl |
| GO_CC_m1GO:004517 | apical part   | 51/2589 | 403/23583 | 0.157175 | 0.590647 | 0.556562 | Abcb1a/Ac  |
| GO_CC_m1GO:000050 | proteasom     | 11/2589 | 72/23583  | 0.16229  | 0.590647 | 0.556562 | Psm3/Psn   |
| GO_CC_m1GO:000042 | DNA-direc     | 19/2589 | 136/23583 | 0.162335 | 0.590647 | 0.556562 | Cd3eap/Cc  |
| GO_CC_m1GO:000165 | fibrillar cen | 18/2589 | 128/23583 | 0.163329 | 0.590647 | 0.556562 | Ankrd1/Cc  |
| GO_CC_m1GO:003606 | ciliary basa  | 18/2589 | 128/23583 | 0.163329 | 0.590647 | 0.556562 | B9d1/Bbs2  |
| GO_CC_m1GO:000579 | smooth en     | 6/2589  | 34/23583  | 0.163376 | 0.590647 | 0.556562 | Calr/Canx1 |
| GO_CC_m1GO:004429 | cell body n   | 6/2589  | 34/23583  | 0.163376 | 0.590647 | 0.556562 | Gabra6/Kc  |
| GO_CC_m1GO:003013 | coated ves    | 23/2589 | 169/23583 | 0.164151 | 0.590647 | 0.556562 | Bcap31/Clv |
| GO_CC_m1GO:000854 | proteasom     | 3/2589  | 13/23583  | 0.164311 | 0.590647 | 0.556562 | Psmc2/Psn  |
| GO_CC_m1GO:003012 | COPII vesic   | 3/2589  | 13/23583  | 0.164311 | 0.590647 | 0.556562 | Pdcd6/Sec  |
| GO_CC_m1GO:004423 | ER-mitochr    | 3/2589  | 13/23583  | 0.164311 | 0.590647 | 0.556562 | Canx/Plekh |
| GO_CC_m1GO:004523 | tricarboxyli  | 3/2589  | 13/23583  | 0.164311 | 0.590647 | 0.556562 | Bckdhb/Ka  |
| GO_CC_m1GO:009744 | astrocyte p   | 3/2589  | 13/23583  | 0.164311 | 0.590647 | 0.556562 | Ezr/Gjb2/K |
| GO_CC_m1GO:003068 | peribosom     | 5/2589  | 27/23583  | 0.168165 | 0.590647 | 0.556562 | Casp8/Ebn  |
| GO_CC_m1GO:009738 | glial cell pr | 4/2589  | 20/23583  | 0.170006 | 0.590647 | 0.556562 | Ezr/Fmr1/C |
| GO_CC_m1GO:001645 | myosin cor    | 10/2589 | 65/23583  | 0.171503 | 0.590647 | 0.556562 | Cgn/Myh14  |
| GO_CC_m1GO:190536 | endopeptic    | 11/2589 | 73/23583  | 0.173356 | 0.590647 | 0.556562 | Psm3/Psn   |
| GO_CC_m1GO:003123 | extrinsic co  | 16/2589 | 113/23583 | 0.173591 | 0.590647 | 0.556562 | Abl2/Fermt |
| GO_CC_m1GO:000581 | centriole     | 15/2589 | 105/23583 | 0.174312 | 0.590647 | 0.556562 | Deup1/Ccc  |
| GO_CC_m1GO:003068 | peribosom     | 12/2589 | 81/23583  | 0.17439  | 0.590647 | 0.556562 | Bms1/Casp  |
| GO_CC_m1GO:003086 | cortical act  | 12/2589 | 81/23583  | 0.17439  | 0.590647 | 0.556562 | Cdh1/Cdh2  |
| GO_CC_m1GO:000194 | male pronu    | 2/2589  | 7/23583   | 0.174431 | 0.590647 | 0.556562 | Tbp/Tet3   |
| GO_CC_m1GO:000581 | spindle pol   | 2/2589  | 7/23583   | 0.174431 | 0.590647 | 0.556562 | Tubgcp2/T  |
| GO_CC_m1GO:003254 | cortical enc  | 2/2589  | 7/23583   | 0.174431 | 0.590647 | 0.556562 | Asph/Osbf  |
| GO_CC_m1GO:003326 | CORVET cc     | 2/2589  | 7/23583   | 0.174431 | 0.590647 | 0.556562 | Tgfbrap1/V |
| GO_CC_m1GO:004321 | lateral loop  | 2/2589  | 7/23583   | 0.174431 | 0.590647 | 0.556562 | Cdh1/Stx4a |
| GO_CC_m1GO:004525 | oxoglutar     | 2/2589  | 7/23583   | 0.174431 | 0.590647 | 0.556562 | Kat2a/Ogd  |
| GO_CC_m1GO:007076 | gamma-se      | 2/2589  | 7/23583   | 0.174431 | 0.590647 | 0.556562 | Aph1a/Aph  |
| GO_CC_m1GO:007082 | tertiary gra  | 2/2589  | 7/23583   | 0.174431 | 0.590647 | 0.556562 | Adam8/Va   |
| GO_CC_m1GO:007258 | NLRP3 infl    | 2/2589  | 7/23583   | 0.174431 | 0.590647 | 0.556562 | Gsdmd/Pyc  |
| GO_CC_m1GO:199063 | proximal d    | 2/2589  | 7/23583   | 0.174431 | 0.590647 | 0.556562 | Fmr1/Gigyf |
| GO_CC_m1GO:003124 | protein ace   | 13/2589 | 89/23583  | 0.174804 | 0.590647 | 0.556562 | Brpf3/Gm3  |
| GO_CC_m1GO:190249 | acetyltrans   | 13/2589 | 89/23583  | 0.174804 | 0.590647 | 0.556562 | Brpf3/Gm3  |
| GO_CC_m1GO:003088 | RNA polym     | 19/2589 | 138/23583 | 0.178314 | 0.590647 | 0.556562 | Cd3eap/Cc  |
| GO_CC_m1GO:000581 | spindle       | 33/2589 | 255/23583 | 0.180734 | 0.590647 | 0.556562 | Rtraf/Ankr |
| GO_CC_m1GO:003242 | stereociliu   | 9/2589  | 58/23583  | 0.181374 | 0.590647 | 0.556562 | Atp8b1/Bb  |
| GO_CC_m1GO:000079 | heterochro    | 13/2589 | 90/23583  | 0.185125 | 0.590647 | 0.556562 | Cenpa/Cer  |

|                                        |           |          |          |          |             |
|----------------------------------------|-----------|----------|----------|----------|-------------|
| GO_CC_m1GO:000579 Golgi stack 12/2589  | 82/23583  | 0.185227 | 0.590647 | 0.556562 | Acpp/Bcap   |
| GO_CC_m1GO:004466 MLL1/2 cor 5/2589    | 28/23583  | 0.187458 | 0.590647 | 0.556562 | Ash2l/Kans  |
| GO_CC_m1GO:007133 MLL1 com 5/2589      | 28/23583  | 0.187458 | 0.590647 | 0.556562 | Ash2l/Kans  |
| GO_CC_m1GO:000167 male germ 4/2589     | 21/23583  | 0.192942 | 0.590647 | 0.556562 | Blm/Sycp1   |
| GO_CC_m1GO:003067 axolemma 4/2589      | 21/23583  | 0.192942 | 0.590647 | 0.556562 | Adora1/Kci  |
| GO_CC_m1GO:000567 Ada2/Gcn5 3/2589     | 14/23583  | 0.193031 | 0.590647 | 0.556562 | Kat2a/Kat2  |
| GO_CC_m1GO:000573 DNA-direc 3/2589     | 14/23583  | 0.193031 | 0.590647 | 0.556562 | Cd3eap/Pc   |
| GO_CC_m1GO:004258 zymogen c 3/2589     | 14/23583  | 0.193031 | 0.590647 | 0.556562 | Cuzd1/Rab   |
| GO_CC_m1GO:003509 histone me 11/2589   | 75/23583  | 0.196527 | 0.590647 | 0.556562 | Ash2l/Ezh1  |
| GO_CC_m1GO:001503 Cajal body 6/2589    | 36/23583  | 0.19745  | 0.590647 | 0.556562 | Cdk2/Fmr1   |
| GO_CC_m1GO:001659 mediator c 6/2589    | 36/23583  | 0.19745  | 0.590647 | 0.556562 | Med10/Me    |
| GO_CC_m1GO:199039 DNA repair 6/2589    | 36/23583  | 0.19745  | 0.590647 | 0.556562 | Msh3/Msh    |
| GO_CC_m1GO:009886 cluster of a 24/2589 | 182/23583 | 0.198381 | 0.590647 | 0.556562 | Abcb1a/At   |
| GO_CC_m1GO:003005 cell-substr 20/2589  | 149/23583 | 0.201166 | 0.590647 | 0.556562 | Aif1l/Arhge |
| GO_CC_m1GO:003239 photorecep 7/2589    | 44/23583  | 0.203294 | 0.590647 | 0.556562 | Fam161a/H   |
| GO_CC_m1GO:000592 cell-substr 19/2589  | 141/23583 | 0.203722 | 0.590647 | 0.556562 | Aif1l/Arhge |
| GO_CC_m1GO:001989 extrinsic co 24/2589 | 183/23583 | 0.206003 | 0.590647 | 0.556562 | Abl2/Anxa2  |
| GO_CC_m1GO:003215 cell divisor 8/2589  | 52/23583  | 0.206607 | 0.590647 | 0.556562 | Cenpc1/Ma   |
| GO_CC_m1GO:009743 mitotic spir 5/2589  | 29/23583  | 0.207497 | 0.590647 | 0.556562 | Cntrl/Fam1  |
| GO_CC_m1GO:000088 Y chromos 1/2589     | 2/23583   | 0.207517 | 0.590647 | 0.556562 | Cdk2        |
| GO_CC_m1GO:000571 recombina 1/2589     | 2/23583   | 0.207517 | 0.590647 | 0.556562 | Msh4        |
| GO_CC_m1GO:000576 gamma DN 1/2589      | 2/23583   | 0.207517 | 0.590647 | 0.556562 | Polg        |
| GO_CC_m1GO:000585 nascent po 1/2589    | 2/23583   | 0.207517 | 0.590647 | 0.556562 | Nacad       |
| GO_CC_m1GO:000595 CAAX-prot 1/2589     | 2/23583   | 0.207517 | 0.590647 | 0.556562 | Fnta        |
| GO_CC_m1GO:000596 glycine cle 1/2589   | 2/23583   | 0.207517 | 0.590647 | 0.556562 | Gldc        |
| GO_CC_m1GO:000596 protein fan 1/2589   | 2/23583   | 0.207517 | 0.590647 | 0.556562 | Fnta        |
| GO_CC_m1GO:000936 endopeptic 1/2589    | 2/23583   | 0.207517 | 0.590647 | 0.556562 | Clpx        |
| GO_CC_m1GO:001480 longitudin 1/2589    | 2/23583   | 0.207517 | 0.590647 | 0.556562 | Dhrs7c      |
| GO_CC_m1GO:001710 glutamate- 1/2589    | 2/23583   | 0.207517 | 0.590647 | 0.556562 | Gclm        |
| GO_CC_m1GO:001900 molybdopt 1/2589     | 2/23583   | 0.207517 | 0.590647 | 0.556562 | Mocs2       |
| GO_CC_m1GO:001903 viral replic 1/2589  | 2/23583   | 0.207517 | 0.590647 | 0.556562 | Fmr1        |
| GO_CC_m1GO:003069 Noc1p-No 1/2589      | 2/23583   | 0.207517 | 0.590647 | 0.556562 | Casp8       |
| GO_CC_m1GO:003084 autosome 1/2589      | 2/23583   | 0.207517 | 0.590647 | 0.556562 | Mael        |
| GO_CC_m1GO:003090 retromer, t 1/2589   | 2/23583   | 0.207517 | 0.590647 | 0.556562 | Snx2        |
| GO_CC_m1GO:003153 mRNA cap 1/2589      | 2/23583   | 0.207517 | 0.590647 | 0.556562 | Rnmt        |
| GO_CC_m1GO:003230 MutSbeta c 1/2589    | 2/23583   | 0.207517 | 0.590647 | 0.556562 | Msh3        |
| GO_CC_m1GO:003299 Fc receptor 1/2589   | 2/23583   | 0.207517 | 0.590647 | 0.556562 | Ms4a2       |
| GO_CC_m1GO:003299 Fc-epsilon 1/2589    | 2/23583   | 0.207517 | 0.590647 | 0.556562 | Ms4a2       |
| GO_CC_m1GO:003466 integrin al 1/2589   | 2/23583   | 0.207517 | 0.590647 | 0.556562 | Itga3       |
| GO_CC_m1GO:003586 alphav-bet 1/2589    | 2/23583   | 0.207517 | 0.590647 | 0.556562 | Prkca       |
| GO_CC_m1GO:004256 insulin-like 1/2589  | 2/23583   | 0.207517 | 0.590647 | 0.556562 | Igf1bp3     |
| GO_CC_m1GO:004351 interleukin 1/2589   | 2/23583   | 0.207517 | 0.590647 | 0.556562 | Il12b       |
| GO_CC_m1GO:004362 PCNA com 1/2589      | 2/23583   | 0.207517 | 0.590647 | 0.556562 | Pcna        |
| GO_CC_m1GO:004430 climbing fil 1/2589  | 2/23583   | 0.207517 | 0.590647 | 0.556562 | C1ql1       |
| GO_CC_m1GO:004479 DNA polyn 1/2589     | 2/23583   | 0.207517 | 0.590647 | 0.556562 | Pcna        |
| GO_CC_m1GO:004502 mitochond 1/2589     | 2/23583   | 0.207517 | 0.590647 | 0.556562 | Pnpt1       |
| GO_CC_m1GO:004532 interleukin 1/2589   | 2/23583   | 0.207517 | 0.590647 | 0.556562 | Ticam2      |
| GO_CC_m1GO:004826 methionine 1/2589    | 2/23583   | 0.207517 | 0.590647 | 0.556562 | Mat2b       |

|                   |                     |           |          |          |          |             |
|-------------------|---------------------|-----------|----------|----------|----------|-------------|
| GO_CC_m1GO:006182 | apical tubu1/2589   | 2/23583   | 0.207517 | 0.590647 | 0.556562 | Dnm3        |
| GO_CC_m1GO:007074 | interleukin-1/2589  | 2/23583   | 0.207517 | 0.590647 | 0.556562 | Il12b       |
| GO_CC_m1GO:007098 | TFIIK comp1/2589    | 2/23583   | 0.207517 | 0.590647 | 0.556562 | Cdk7        |
| GO_CC_m1GO:007106 | alpha9-bet1/2589    | 2/23583   | 0.207517 | 0.590647 | 0.556562 | Adam8       |
| GO_CC_m1GO:007113 | alpha9-bet1/2589    | 2/23583   | 0.207517 | 0.590647 | 0.556562 | Adam8       |
| GO_CC_m1GO:009705 | CNTFR-CL1/2589      | 2/23583   | 0.207517 | 0.590647 | 0.556562 | Cntfr       |
| GO_CC_m1GO:009712 | cyclin A2-C1/2589   | 2/23583   | 0.207517 | 0.590647 | 0.556562 | Cdk2        |
| GO_CC_m1GO:009712 | cyclin B1-C1/2589   | 2/23583   | 0.207517 | 0.590647 | 0.556562 | Cdk1        |
| GO_CC_m1GO:009719 | Shu compl1/2589     | 2/23583   | 0.207517 | 0.590647 | 0.556562 | Zswim7      |
| GO_CC_m1GO:009723 | lamellar bc1/2589   | 2/23583   | 0.207517 | 0.590647 | 0.556562 | Abca3       |
| GO_CC_m1GO:009723 | alveolar lar1/2589  | 2/23583   | 0.207517 | 0.590647 | 0.556562 | Abca3       |
| GO_CC_m1GO:009736 | MCM8-MC1/2589       | 2/23583   | 0.207517 | 0.590647 | 0.556562 | Mcm8        |
| GO_CC_m1GO:009744 | spine appa1/2589    | 2/23583   | 0.207517 | 0.590647 | 0.556562 | Fmr1        |
| GO_CC_m1GO:009754 | axonemal k1/2589    | 2/23583   | 0.207517 | 0.590647 | 0.556562 | Ift88       |
| GO_CC_m1GO:009884 | postsynapt1/2589    | 2/23583   | 0.207517 | 0.590647 | 0.556562 | Rab5a       |
| GO_CC_m1GO:190273 | dendritic fil1/2589 | 2/23583   | 0.207517 | 0.590647 | 0.556562 | Fmr1        |
| GO_CC_m1GO:190520 | methylocro1/2589    | 2/23583   | 0.207517 | 0.590647 | 0.556562 | Mccc2       |
| GO_CC_m1GO:199011 | RQC comp1/2589      | 2/23583   | 0.207517 | 0.590647 | 0.556562 | Nemf        |
| GO_CC_m1GO:199062 | CHOP-ATF1/2589      | 2/23583   | 0.207517 | 0.590647 | 0.556562 | Atf3        |
| GO_CC_m1GO:199066 | PCSK9-LDL1/2589     | 2/23583   | 0.207517 | 0.590647 | 0.556562 | Pcsk9       |
| GO_CC_m1GO:003066 | Golgi-asso9/2589    | 60/23583  | 0.208277 | 0.590647 | 0.556562 | Copg2/Ldlr  |
| GO_CC_m1GO:001623 | inclusion b11/2589  | 76/23583  | 0.208601 | 0.590647 | 0.556562 | Gpx1/Gys1   |
| GO_CC_m1GO:003042 | growth cor25/2589   | 192/23583 | 0.210545 | 0.590647 | 0.556562 | Aatk/Arhge  |
| GO_CC_m1GO:003086 | cortical cyt16/2589 | 117/23583 | 0.211164 | 0.590647 | 0.556562 | Cdh1/Cdh2   |
| GO_CC_m1GO:199035 | transporter38/2589  | 303/23583 | 0.213971 | 0.590647 | 0.556562 | Akap6/Anc   |
| GO_CC_m1GO:000023 | astral micr2/2589   | 8/23583   | 0.216425 | 0.590647 | 0.556562 | Fam161a/F   |
| GO_CC_m1GO:000080 | central eler2/2589  | 8/23583   | 0.216425 | 0.590647 | 0.556562 | Syce2/Sycp  |
| GO_CC_m1GO:001705 | serine C-pi2/2589   | 8/23583   | 0.216425 | 0.590647 | 0.556562 | Sptlc2/Spts |
| GO_CC_m1GO:003121 | endoplasm2/2589     | 8/23583   | 0.216425 | 0.590647 | 0.556562 | Sptlc2/Spts |
| GO_CC_m1GO:003159 | nuclear prc2/2589   | 8/23583   | 0.216425 | 0.590647 | 0.556562 | Psmc2/Psr   |
| GO_CC_m1GO:004258 | glycogen g2/2589    | 8/23583   | 0.216425 | 0.590647 | 0.556562 | Fasn/Ppp1i  |
| GO_CC_m1GO:004320 | axon hilloc2/2589   | 8/23583   | 0.216425 | 0.590647 | 0.556562 | Htr1a/Serp  |
| GO_CC_m1GO:004325 | laminin cor2/2589   | 8/23583   | 0.216425 | 0.590647 | 0.556562 | Lama5/Lan   |
| GO_CC_m1GO:007053 | BRCA1-A c2/2589     | 8/23583   | 0.216425 | 0.590647 | 0.556562 | Babam2/Ui   |
| GO_CC_m1GO:007084 | core media2/2589    | 8/23583   | 0.216425 | 0.590647 | 0.556562 | Med10/Me    |
| GO_CC_m1GO:007266 | tRNA-splic2/2589    | 8/23583   | 0.216425 | 0.590647 | 0.556562 | Rtraf/Zbtb8 |
| GO_CC_m1GO:190596 | protein-cyt2/2589   | 8/23583   | 0.216425 | 0.590647 | 0.556562 | Sptlc2/Spts |
| GO_CC_m1GO:001049 | cytoplasmic7/2589   | 45/23583  | 0.219643 | 0.59564  | 0.561266 | Eif4e/Fmr1  |
| GO_CC_m1GO:000576 | lysosomal r16/2589  | 118/23583 | 0.221094 | 0.59564  | 0.561266 | Anxa2/Cd6   |
| GO_CC_m1GO:009885 | lytic vacuol16/2589 | 118/23583 | 0.221094 | 0.59564  | 0.561266 | Anxa2/Cd6   |
| GO_CC_m1GO:001470 | intercalatec9/2589  | 61/23583  | 0.2223   | 0.59564  | 0.561266 | Akap6/Cav   |
| GO_CC_m1GO:003258 | Golgi cister3/2589  | 15/23583  | 0.222861 | 0.59564  | 0.561266 | Bcap31/Csq  |
| GO_CC_m1GO:004322 | Schmidt-L23/2589    | 15/23583  | 0.222861 | 0.59564  | 0.561266 | Anxa2/Cdh   |
| GO_CC_m1GO:004324 | Fanconi an3/2589    | 15/23583  | 0.222861 | 0.59564  | 0.561266 | Fance/Fanc  |
| GO_CC_m1GO:009054 | Flemming l3/2589    | 15/23583  | 0.222861 | 0.59564  | 0.561266 | Cenpc1/Ol   |
| GO_CC_m1GO:190249 | transmemk37/2589    | 296/23583 | 0.223692 | 0.59564  | 0.561266 | Akap6/Anc   |
| GO_CC_m1GO:003013 | endocytic v21/2589  | 160/23583 | 0.223779 | 0.59564  | 0.561266 | Adam8/An    |
| GO_CC_m1GO:004430 | neuron prc27/2589   | 211/23583 | 0.226334 | 0.600955 | 0.566274 | Adora1/Cd   |

|                                |         |           |          |          |          |             |
|--------------------------------|---------|-----------|----------|----------|----------|-------------|
| GO_CC_m1GO:00319C late endos   | 7/2589  | 46/23583  | 0.236438 | 0.623509 | 0.587527 | 3110002H1   |
| GO_CC_m1GO:000031 organellar   | 8/2589  | 54/23583  | 0.237142 | 0.623509 | 0.587527 | Mrpl10/Mr   |
| GO_CC_m1GO:00057E mitochond    | 8/2589  | 54/23583  | 0.237142 | 0.623509 | 0.587527 | Mrpl10/Mr   |
| GO_CC_m1GO:000802 transcriptic | 8/2589  | 54/23583  | 0.237142 | 0.623509 | 0.587527 | Ccn11/Ell2/ |
| GO_CC_m1GO:00436C nuclear rep  | 4/2589  | 23/23583  | 0.241323 | 0.63296  | 0.596432 | Ercc5/Prpf  |
| GO_CC_m1GO:00347C ion channe   | 35/2589 | 282/23583 | 0.244532 | 0.633728 | 0.597157 | Akap6/Anc   |
| GO_CC_m1GO:00004C phagophor    | 5/2589  | 31/23583  | 0.249453 | 0.633728 | 0.597157 | Atg2a/Plek  |
| GO_CC_m1GO:004247 melanoson    | 5/2589  | 31/23583  | 0.249453 | 0.633728 | 0.597157 | Dct/Rab27l  |
| GO_CC_m1GO:004877 pigment gr   | 5/2589  | 31/23583  | 0.249453 | 0.633728 | 0.597157 | Dct/Rab27l  |
| GO_CC_m1GO:003042 site of pola | 25/2589 | 197/23583 | 0.250115 | 0.633728 | 0.597157 | Aatk/Arhge  |
| GO_CC_m1GO:00347C calcium ch   | 8/2589  | 55/23583  | 0.252958 | 0.633728 | 0.597157 | Akap6/Cac   |
| GO_CC_m1GO:003001 CCR4-NOT     | 3/2589  | 16/23583  | 0.253504 | 0.633728 | 0.597157 | Cnot10/Cn   |
| GO_CC_m1GO:00332C DNA helica   | 3/2589  | 16/23583  | 0.253504 | 0.633728 | 0.597157 | Gm3086/H    |
| GO_CC_m1GO:00970E perinuclear  | 3/2589  | 16/23583  | 0.253504 | 0.633728 | 0.597157 | Bcap31/Kci  |
| GO_CC_m1GO:00008C X chromos    | 2/2589  | 9/23583   | 0.25915  | 0.633728 | 0.597157 | Cdk2/H2af   |
| GO_CC_m1GO:000211 semaphori    | 2/2589  | 9/23583   | 0.25915  | 0.633728 | 0.597157 | Plxna2/Plx  |
| GO_CC_m1GO:000581 aster        | 2/2589  | 9/23583   | 0.25915  | 0.633728 | 0.597157 | Fam161a/F   |
| GO_CC_m1GO:00312C SCAR com     | 2/2589  | 9/23583   | 0.25915  | 0.633728 | 0.597157 | Abi1/Ncka   |
| GO_CC_m1GO:003161 nuclear per  | 2/2589  | 9/23583   | 0.25915  | 0.633728 | 0.597157 | Cenpa/Cer   |
| GO_CC_m1GO:004261 MHC class    | 2/2589  | 9/23583   | 0.25915  | 0.633728 | 0.597157 | H2-DMb2/    |
| GO_CC_m1GO:00972C alveolar lar | 2/2589  | 9/23583   | 0.25915  | 0.633728 | 0.597157 | Abca3/Na    |
| GO_CC_m1GO:00989E anchored c   | 2/2589  | 9/23583   | 0.25915  | 0.633728 | 0.597157 | Rab27b/Ra   |
| GO_CC_m1GO:19053E peptidase    | 13/2589 | 97/23583  | 0.264616 | 0.633728 | 0.597157 | Psm3/Psn    |
| GO_CC_m1GO:00058E proteasom    | 4/2589  | 24/23583  | 0.266466 | 0.633728 | 0.597157 | Psmc2/Psn   |
| GO_CC_m1GO:00308E replisome    | 4/2589  | 24/23583  | 0.266466 | 0.633728 | 0.597157 | Ercc5/Prpf  |
| GO_CC_m1GO:00425E zymogen      | 4/2589  | 24/23583  | 0.266466 | 0.633728 | 0.597157 | Cuzd1/Ogt   |
| GO_CC_m1GO:009744 apical denc  | 4/2589  | 24/23583  | 0.266466 | 0.633728 | 0.597157 | Cpeb3/Gir   |
| GO_CC_m1GO:00987E Golgi subc   | 50/2589 | 416/23583 | 0.26808  | 0.633728 | 0.597157 | Acer3/Acp   |
| GO_CC_m1GO:000587 microtubul   | 19/2589 | 148/23583 | 0.268978 | 0.633728 | 0.597157 | Dctn5/Dna   |
| GO_CC_m1GO:00905E nuclear tra  | 5/2589  | 32/23583  | 0.271184 | 0.633728 | 0.597157 | App11/Bah   |
| GO_CC_m1GO:19902C oxidoreduc   | 14/2589 | 106/23583 | 0.272028 | 0.633728 | 0.597157 | Bckdhb/Cb   |
| GO_CC_m1GO:00162E aggresome    | 6/2589  | 40/23583  | 0.272162 | 0.633728 | 0.597157 | Hspa1a/Pa   |
| GO_CC_m1GO:00321E cleavage ft  | 6/2589  | 40/23583  | 0.272162 | 0.633728 | 0.597157 | Cenpc1/M    |
| GO_CC_m1GO:00435E nuclear rep  | 6/2589  | 40/23583  | 0.272162 | 0.633728 | 0.597157 | Ercc5/Pcna  |
| GO_CC_m1GO:00487E presynaptic  | 6/2589  | 40/23583  | 0.272162 | 0.633728 | 0.597157 | Adora1/Ar   |
| GO_CC_m1GO:00347C cation char  | 26/2589 | 209/23583 | 0.278572 | 0.633728 | 0.597157 | Akap6/Cac   |
| GO_CC_m1GO:004444 endosomal    | 26/2589 | 209/23583 | 0.278572 | 0.633728 | 0.597157 | 3110002H1   |
| GO_CC_m1GO:00444E microtubul   | 19/2589 | 149/23583 | 0.278889 | 0.633728 | 0.597157 | Deup1/Ccc   |
| GO_CC_m1GO:009902 tethering    | 9/2589  | 65/23583  | 0.281578 | 0.633728 | 0.597157 | Cog4/Cog    |
| GO_CC_m1GO:000564 nuclear out  | 3/2589  | 17/23583  | 0.284682 | 0.633728 | 0.597157 | Akap6/Ret   |
| GO_CC_m1GO:000577 integral coi | 3/2589  | 17/23583  | 0.284682 | 0.633728 | 0.597157 | Pex10/Pex   |
| GO_CC_m1GO:00329E myosin fila  | 3/2589  | 17/23583  | 0.284682 | 0.633728 | 0.597157 | Myh14/My    |
| GO_CC_m1GO:00332E node of Ra   | 3/2589  | 17/23583  | 0.284682 | 0.633728 | 0.597157 | Cdh1/Kcnq   |
| GO_CC_m1GO:004444 ciliary part | 52/2589 | 437/23583 | 0.288423 | 0.633728 | 0.597157 | Akap14/At   |
| GO_CC_m1GO:000191 photorecep   | 7/2589  | 49/23583  | 0.28904  | 0.633728 | 0.597157 | Dnm3/Fam    |
| GO_CC_m1GO:003151 PcG protei   | 7/2589  | 49/23583  | 0.28904  | 0.633728 | 0.597157 | Asx1/Ezh1   |
| GO_CC_m1GO:00007E nuclear chr  | 10/2589 | 74/23583  | 0.291911 | 0.633728 | 0.597157 | Terb1/Dcl   |
| GO_CC_m1GO:003532 transcriptic | 4/2589  | 25/23583  | 0.292048 | 0.633728 | 0.597157 | Bcas3/Hist  |

|                                       |          |          |          |          |             |
|---------------------------------------|----------|----------|----------|----------|-------------|
| GO_CC_m1GO:00083C integrin co 5/2589  | 33/23583 | 0.293295 | 0.633728 | 0.597157 | Itga3/Itga6 |
| GO_CC_m1GO:00004E core TFIIH 1/2589   | 3/23583  | 0.294525 | 0.633728 | 0.597157 | Gtf2h3      |
| GO_CC_m1GO:00009E condensed 1/2589    | 3/23583  | 0.294525 | 0.633728 | 0.597157 | Cenpa       |
| GO_CC_m1GO:00055E collagen ty 1/2589  | 3/23583  | 0.294525 | 0.633728 | 0.597157 | Col5a1      |
| GO_CC_m1GO:00056C laminin-3 c 1/2589  | 3/23583  | 0.294525 | 0.633728 | 0.597157 | Lamb2       |
| GO_CC_m1GO:000574m-AAA coi 1/2589     | 3/23583  | 0.294525 | 0.633728 | 0.597157 | Spq7        |
| GO_CC_m1GO:000594phosphatic 1/2589    | 3/23583  | 0.294525 | 0.633728 | 0.597157 | Pik3r6      |
| GO_CC_m1GO:0005946-phosphc 1/2589     | 3/23583  | 0.294525 | 0.633728 | 0.597157 | Pfkl        |
| GO_CC_m1GO:00059E DNA-depe 1/2589     | 3/23583  | 0.294525 | 0.633728 | 0.597157 | Prkdc       |
| GO_CC_m1GO:000827gamma-tu 1/2589      | 3/23583  | 0.294525 | 0.633728 | 0.597157 | Tubgcp2     |
| GO_CC_m1GO:00147C junctional e 1/2589 | 3/23583  | 0.294525 | 0.633728 | 0.597157 | Akap6       |
| GO_CC_m1GO:00165E cyclin-depe 1/2589  | 3/23583  | 0.294525 | 0.633728 | 0.597157 | Cdk5        |
| GO_CC_m1GO:00169E kinesin II c 1/2589 | 3/23583  | 0.294525 | 0.633728 | 0.597157 | Kifap3      |
| GO_CC_m1GO:001844translation 1/2589   | 3/23583  | 0.294525 | 0.633728 | 0.597157 | Gspt2       |
| GO_CC_m1GO:002001ciliary pock 1/2589  | 3/23583  | 0.294525 | 0.633728 | 0.597157 | Snap29      |
| GO_CC_m1GO:002001ciliary pock 1/2589  | 3/23583  | 0.294525 | 0.633728 | 0.597157 | Snap29      |
| GO_CC_m1GO:003031external en 1/2589   | 3/23583  | 0.294525 | 0.633728 | 0.597157 | Pgghg       |
| GO_CC_m1GO:00309C retromer, c 1/2589  | 3/23583  | 0.294525 | 0.633728 | 0.597157 | Vps29       |
| GO_CC_m1GO:003141NatC comp 1/2589     | 3/23583  | 0.294525 | 0.633728 | 0.597157 | Naa38       |
| GO_CC_m1GO:003201phagolysoe 1/2589    | 3/23583  | 0.294525 | 0.633728 | 0.597157 | Adam8       |
| GO_CC_m1GO:003204DSIF comp 1/2589     | 3/23583  | 0.294525 | 0.633728 | 0.597157 | Supt5       |
| GO_CC_m1GO:003212dense core 1/2589    | 3/23583  | 0.294525 | 0.633728 | 0.597157 | Adam8       |
| GO_CC_m1GO:00322E ribonuclea 1/2589   | 3/23583  | 0.294525 | 0.633728 | 0.597157 | Rnaseh2b    |
| GO_CC_m1GO:00331C cis-Golgi n 1/2589  | 3/23583  | 0.294525 | 0.633728 | 0.597157 | Bok         |
| GO_CC_m1GO:00351C FACT comp 1/2589    | 3/23583  | 0.294525 | 0.633728 | 0.597157 | Tonsl       |
| GO_CC_m1GO:00362E tubulobulb 1/2589   | 3/23583  | 0.294525 | 0.633728 | 0.597157 | Dnm3        |
| GO_CC_m1GO:004202host cell nt 1/2589  | 3/23583  | 0.294525 | 0.633728 | 0.597157 | Fmr1        |
| GO_CC_m1GO:00432E laminin-10 1/2589   | 3/23583  | 0.294525 | 0.633728 | 0.597157 | Lama5       |
| GO_CC_m1GO:00440E host cell nt 1/2589 | 3/23583  | 0.294525 | 0.633728 | 0.597157 | Fmr1        |
| GO_CC_m1GO:004527plasma me 1/2589     | 3/23583  | 0.294525 | 0.633728 | 0.597157 | Ndufs1      |
| GO_CC_m1GO:007011ciliary neur 1/2589  | 3/23583  | 0.294525 | 0.633728 | 0.597157 | Cntfr       |
| GO_CC_m1GO:007082tertiary gra 1/2589  | 3/23583  | 0.294525 | 0.633728 | 0.597157 | Vamp1       |
| GO_CC_m1GO:00710C U4/U6 snR 1/2589    | 3/23583  | 0.294525 | 0.633728 | 0.597157 | Prpf4       |
| GO_CC_m1GO:00906E box H/ACA 1/2589    | 3/23583  | 0.294525 | 0.633728 | 0.597157 | Nop10       |
| GO_CC_m1GO:00974E Schwann c 1/2589    | 3/23583  | 0.294525 | 0.633728 | 0.597157 | Ezr         |
| GO_CC_m1GO:009751myosin II fi 1/2589  | 3/23583  | 0.294525 | 0.633728 | 0.597157 | Myh14       |
| GO_CC_m1GO:00975E sperm cyto 1/2589   | 3/23583  | 0.294525 | 0.633728 | 0.597157 | Ift172      |
| GO_CC_m1GO:00985E cytoplasmic 1/2589  | 3/23583  | 0.294525 | 0.633728 | 0.597157 | Rab5a       |
| GO_CC_m1GO:00985E cytoplasmic 1/2589  | 3/23583  | 0.294525 | 0.633728 | 0.597157 | Ezr         |
| GO_CC_m1GO:009884postsynapt 1/2589    | 3/23583  | 0.294525 | 0.633728 | 0.597157 | Dnm3        |
| GO_CC_m1GO:009907mitochond 1/2589     | 3/23583  | 0.294525 | 0.633728 | 0.597157 | Park2       |
| GO_CC_m1GO:009952region of c 1/2589   | 3/23583  | 0.294525 | 0.633728 | 0.597157 | Camk2a      |
| GO_CC_m1GO:009952postsynapt 1/2589    | 3/23583  | 0.294525 | 0.633728 | 0.597157 | Camk2a      |
| GO_CC_m1GO:199041Pex17p-Pe 1/2589     | 3/23583  | 0.294525 | 0.633728 | 0.597157 | Pex12       |
| GO_CC_m1GO:199042RZZ compl 1/2589     | 3/23583  | 0.294525 | 0.633728 | 0.597157 | Zwilch      |
| GO_CC_m1GO:199042peroxisom 1/2589     | 3/23583  | 0.294525 | 0.633728 | 0.597157 | Pex12       |
| GO_CC_m1GO:199081growth cor 1/2589    | 3/23583  | 0.294525 | 0.633728 | 0.597157 | Fmr1        |
| GO_CC_m1GO:000574mitochond 2/2589     | 10/23583 | 0.301942 | 0.640735 | 0.603759 | Grpel1/Tim  |

|                                        |           |          |          |          |             |
|----------------------------------------|-----------|----------|----------|----------|-------------|
| GO_CC_m1GO:00323C mismatch r2/2589     | 10/23583  | 0.301942 | 0.640735 | 0.603759 | Msh3/Msh    |
| GO_CC_m1GO:00487E presynaptic2/2589    | 10/23583  | 0.301942 | 0.640735 | 0.603759 | Cdh2/Stx1f  |
| GO_CC_m1GO:00712C WASH cor2/2589       | 10/23583  | 0.301942 | 0.640735 | 0.603759 | Dnajc13/W   |
| GO_CC_m1GO:00905E cation-tran2/2589    | 10/23583  | 0.301942 | 0.640735 | 0.603759 | Atp1b2/Slc  |
| GO_CC_m1GO:00975E ciliary tran2/2589   | 10/23583  | 0.301942 | 0.640735 | 0.603759 | Fbf1/Odf2   |
| GO_CC_m1GO:01500C enzyme aci2/2589     | 10/23583  | 0.301942 | 0.640735 | 0.603759 | Cdk5/Cdk7   |
| GO_CC_m1GO:00550E recycling e16/2589   | 126/23583 | 0.306904 | 0.649986 | 0.612476 | Aatk/Bok/C  |
| GO_CC_m1GO:00988C inner mitoc17/2589   | 135/23583 | 0.311598 | 0.656486 | 0.618601 | 2010107E0   |
| GO_CC_m1GO:00056E nuclear inn6/2589    | 42/23583  | 0.3118   | 0.656486 | 0.618601 | Terb1/Lbr/  |
| GO_CC_m1GO:19025E H4 histone 6/2589    | 42/23583  | 0.3118   | 0.656486 | 0.618601 | Gm3086/Ki   |
| GO_CC_m1GO:000807 voltage-ga11/2589    | 84/23583  | 0.314614 | 0.659185 | 0.621144 | Kcna2/Kcna  |
| GO_CC_m1GO:00312E intrinsic co3/2589   | 18/23583  | 0.31614  | 0.659185 | 0.621144 | Pex10/Pex   |
| GO_CC_m1GO:00315E microvillus 3/2589   | 18/23583  | 0.31614  | 0.659185 | 0.621144 | Ezr/Mttp/S  |
| GO_CC_m1GO:00350E ESC/E(Z) cc3/2589    | 18/23583  | 0.31614  | 0.659185 | 0.621144 | Ezh1/H2afy  |
| GO_CC_m1GO:00469E pore comp3/2589      | 18/23583  | 0.31614  | 0.659185 | 0.621144 | C7/Spg7/V   |
| GO_CC_m1GO:00226E proteasom4/2589      | 26/23583  | 0.317929 | 0.660361 | 0.622252 | Psmc2/Psr   |
| GO_CC_m1GO:00972E sperm mid4/2589      | 26/23583  | 0.317929 | 0.660361 | 0.622252 | Hyal3/Ift17 |
| GO_CC_m1GO:00431E dendritic s22/2589   | 179/23583 | 0.319805 | 0.66298  | 0.62472  | Abl2/Adora  |
| GO_CC_m1GO:00001E Golgi mem28/2589     | 232/23583 | 0.326234 | 0.670566 | 0.631868 | Acer3/Atp7  |
| GO_CC_m1GO:000564 nuclear poi9/2589    | 68/23583  | 0.328576 | 0.670566 | 0.631868 | 1700123L1   |
| GO_CC_m1GO:00057E endoplasm9/2589      | 68/23583  | 0.328576 | 0.670566 | 0.631868 | Copg2/Gbt   |
| GO_CC_m1GO:00099E basal plasn6/2589    | 43/23583  | 0.331968 | 0.670566 | 0.631868 | Cav1/Erbb   |
| GO_CC_m1GO:00319C early endo6/2589     | 43/23583  | 0.331968 | 0.670566 | 0.631868 | Bok/Dnajc1  |
| GO_CC_m1GO:00450E keratin filar6/2589  | 43/23583  | 0.331968 | 0.670566 | 0.631868 | Fbf1/Krt77, |
| GO_CC_m1GO:00009E spindle pol15/2589   | 120/23583 | 0.337243 | 0.670566 | 0.631868 | Ankrd53/C   |
| GO_CC_m1GO:000577 multivesicu5/2589    | 35/23583  | 0.338295 | 0.670566 | 0.631868 | Acpp/Cd6E   |
| GO_CC_m1GO:00443C neuron spii22/2589   | 181/23583 | 0.339197 | 0.670566 | 0.631868 | Abl2/Adora  |
| GO_CC_m1GO:00444E nucleolar p22/2589   | 181/23583 | 0.339197 | 0.670566 | 0.631868 | Ankrd1/Cc   |
| GO_CC_m1GO:007101 catalytic str13/2589 | 103/23583 | 0.340403 | 0.670566 | 0.631868 | Cactin/Ddx  |
| GO_CC_m1GO:190494 ATPase cor11/2589    | 86/23583  | 0.343011 | 0.670566 | 0.631868 | App11/Atp   |
| GO_CC_m1GO:00001E Golgi cis ci2/2589   | 11/23583  | 0.34427  | 0.670566 | 0.631868 | Lyz1/Smpc   |
| GO_CC_m1GO:00015E microfibril 2/2589   | 11/23583  | 0.34427  | 0.670566 | 0.631868 | Fbn1/Mfap   |
| GO_CC_m1GO:00019E uropod 2/2589        | 11/23583  | 0.34427  | 0.670566 | 0.631868 | Ezr/Flot2   |
| GO_CC_m1GO:000217 palmitoyltr2/2589    | 11/23583  | 0.34427  | 0.670566 | 0.631868 | Sptlc2/Spts |
| GO_CC_m1GO:00056E U4 snRNP 2/2589      | 11/23583  | 0.34427  | 0.670566 | 0.631868 | Naa38/Snrj  |
| GO_CC_m1GO:00312E cell trailing 2/2589 | 11/23583  | 0.34427  | 0.670566 | 0.631868 | Ezr/Flot2   |
| GO_CC_m1GO:00314E Cul4A-RIN 2/2589     | 11/23583  | 0.34427  | 0.670566 | 0.631868 | Cul4a/Glmi  |
| GO_CC_m1GO:00351C PRC1 com2/2589       | 11/23583  | 0.34427  | 0.670566 | 0.631868 | Phc2/Ring1  |
| GO_CC_m1GO:00425E MCM com2/2589        | 11/23583  | 0.34427  | 0.670566 | 0.631868 | Mcm8/Ton    |
| GO_CC_m1GO:00617C GATOR2 cc2/2589      | 11/23583  | 0.34427  | 0.670566 | 0.631868 | Szt2/Wdr2   |
| GO_CC_m1GO:007254 ER membr2/2589       | 11/23583  | 0.34427  | 0.670566 | 0.631868 | Emc3/Emc    |
| GO_CC_m1GO:00056E replication 9/2589   | 69/23583  | 0.344567 | 0.670566 | 0.631868 | Blm/Ercc5/  |
| GO_CC_m1GO:000594 phosphatic 3/2589    | 19/23583  | 0.347646 | 0.670566 | 0.631868 | Pik3r3/Pik3 |
| GO_CC_m1GO:004321 compact nr3/2589     | 19/23583  | 0.347646 | 0.670566 | 0.631868 | Anxa2/Cdh   |
| GO_CC_m1GO:00301E clathrin-co12/2589   | 95/23583  | 0.348626 | 0.670566 | 0.631868 | Bcap31/Clv  |
| GO_CC_m1GO:00427E presynaptic10/2589   | 78/23583  | 0.351539 | 0.670566 | 0.631868 | Ache/Ador   |
| GO_CC_m1GO:00190C SCF ubiqui9/2589     | 70/23583  | 0.360671 | 0.670566 | 0.631868 | Abtb1/Cul1  |
| GO_CC_m1GO:00059C brush bord16/2589    | 131/23583 | 0.36475  | 0.670566 | 0.631868 | Abcb1a/At   |

|                                      |          |          |          |          |           |
|--------------------------------------|----------|----------|----------|----------|-----------|
| GO_CC_m1GO:004307germ cell n4/2589   | 28/23583 | 0.370061 | 0.670566 | 0.631868 | Blm/Sycp1 |
| GO_CC_m1GO:000012PCAF comç1/2589     | 4/23583  | 0.371984 | 0.670566 | 0.631868 | Taf9      |
| GO_CC_m1GO:000093GARP com1/2589      | 4/23583  | 0.371984 | 0.670566 | 0.631868 | Vps53     |
| GO_CC_m1GO:000174Barr body 1/2589    | 4/23583  | 0.371984 | 0.670566 | 0.631868 | H2afy     |
| GO_CC_m1GO:000218ribose pho:1/2589   | 4/23583  | 0.371984 | 0.670566 | 0.631868 | Prpsap2   |
| GO_CC_m1GO:000561laminin-5 c1/2589   | 4/23583  | 0.371984 | 0.670566 | 0.631868 | Lama5     |
| GO_CC_m1GO:000574mitochond 1/2589    | 4/23583  | 0.371984 | 0.670566 | 0.631868 | Sdhd      |
| GO_CC_m1GO:000578Sec61 tran:1/2589   | 4/23583  | 0.371984 | 0.670566 | 0.631868 | Bcap31    |
| GO_CC_m1GO:000586muscle thir1/2589   | 4/23583  | 0.371984 | 0.670566 | 0.631868 | Tpm4      |
| GO_CC_m1GO:000594mitochond 1/2589    | 4/23583  | 0.371984 | 0.670566 | 0.631868 | Bckdhd    |
| GO_CC_m1GO:000862epsilon DN1/2589    | 4/23583  | 0.371984 | 0.670566 | 0.631868 | Pole      |
| GO_CC_m1GO:000932phenylalan 1/2589   | 4/23583  | 0.371984 | 0.670566 | 0.631868 | Lrrc47    |
| GO_CC_m1GO:001707intracellula 1/2589 | 4/23583  | 0.371984 | 0.670566 | 0.631868 | Cnga2     |
| GO_CC_m1GO:003047actin cap 1/2589    | 4/23583  | 0.371984 | 0.670566 | 0.631868 | Gsn       |
| GO_CC_m1GO:003068Noc compl1/2589     | 4/23583  | 0.371984 | 0.670566 | 0.631868 | Casp8     |
| GO_CC_m1GO:003126CD95 deatl1/2589    | 4/23583  | 0.371984 | 0.670566 | 0.631868 | Casp8     |
| GO_CC_m1GO:003202NELF comç1/2589     | 4/23583  | 0.371984 | 0.670566 | 0.631868 | Nelfb     |
| GO_CC_m1GO:003280DNA ligase1/2589    | 4/23583  | 0.371984 | 0.670566 | 0.631868 | Lig3      |
| GO_CC_m1GO:003427phosphatic1/2589    | 4/23583  | 0.371984 | 0.670566 | 0.631868 | Pik3r4    |
| GO_CC_m1GO:003427phosphatic1/2589    | 4/23583  | 0.371984 | 0.670566 | 0.631868 | Pik3r4    |
| GO_CC_m1GO:003518Rb-E2F cor1/2589    | 4/23583  | 0.371984 | 0.670566 | 0.631868 | E2f1      |
| GO_CC_m1GO:003536histone loc1/2589   | 4/23583  | 0.371984 | 0.670566 | 0.631868 | Ice1      |
| GO_CC_m1GO:003551PR-DUB cc1/2589     | 4/23583  | 0.371984 | 0.670566 | 0.631868 | Asx1      |
| GO_CC_m1GO:003565Mon1-Ccz:1/2589     | 4/23583  | 0.371984 | 0.670566 | 0.631868 | 3110002H1 |
| GO_CC_m1GO:003639RNA N6-m1/2589      | 4/23583  | 0.371984 | 0.670566 | 0.631868 | Virma     |
| GO_CC_m1GO:004256insulin-like1/2589  | 4/23583  | 0.371984 | 0.670566 | 0.631868 | Igf3      |
| GO_CC_m1GO:004430calyx of He1/2589   | 4/23583  | 0.371984 | 0.670566 | 0.631868 | Kcnk2     |
| GO_CC_m1GO:004430axonal spin1/2589   | 4/23583  | 0.371984 | 0.670566 | 0.631868 | Gria1     |
| GO_CC_m1GO:004526succinate c1/2589   | 4/23583  | 0.371984 | 0.670566 | 0.631868 | Sdhd      |
| GO_CC_m1GO:004527respiratory 1/2589  | 4/23583  | 0.371984 | 0.670566 | 0.631868 | Sdhd      |
| GO_CC_m1GO:004528succinate c1/2589   | 4/23583  | 0.371984 | 0.670566 | 0.631868 | Sdhd      |
| GO_CC_m1GO:004528fumarate rç1/2589   | 4/23583  | 0.371984 | 0.670566 | 0.631868 | Sdhd      |
| GO_CC_m1GO:007044elongin coi1/2589   | 4/23583  | 0.371984 | 0.670566 | 0.631868 | Elob      |
| GO_CC_m1GO:007047plasma me1/2589     | 4/23583  | 0.371984 | 0.670566 | 0.631868 | Ndufs1    |
| GO_CC_m1GO:007126translocon 1/2589   | 4/23583  | 0.371984 | 0.670566 | 0.631868 | Bcap31    |
| GO_CC_m1GO:007182FANCM-M1/2589       | 4/23583  | 0.371984 | 0.670566 | 0.631868 | Cenpx     |
| GO_CC_m1GO:007196elastic fiber1/2589 | 4/23583  | 0.371984 | 0.670566 | 0.631868 | Fbln5     |
| GO_CC_m1GO:007255NLRP1 inflç1/2589   | 4/23583  | 0.371984 | 0.670566 | 0.631868 | Pycard    |
| GO_CC_m1GO:009720epidermal 1/2589    | 4/23583  | 0.371984 | 0.670566 | 0.631868 | Abca12    |
| GO_CC_m1GO:009736CIA compleç1/2589   | 4/23583  | 0.371984 | 0.670566 | 0.631868 | Ciao1     |
| GO_CC_m1GO:009748multivesicu1/2589   | 4/23583  | 0.371984 | 0.670566 | 0.631868 | Cd63      |
| GO_CC_m1GO:009762extrinsic co1/2589  | 4/23583  | 0.371984 | 0.670566 | 0.631868 | Plekhf2   |
| GO_CC_m1GO:009765phosphatic1/2589    | 4/23583  | 0.371984 | 0.670566 | 0.631868 | Pik3r6    |
| GO_CC_m1GO:190344amylin recç1/2589   | 4/23583  | 0.371984 | 0.670566 | 0.631868 | Calcr     |
| GO_CC_m1GO:199035terminal wç1/2589   | 4/23583  | 0.371984 | 0.670566 | 0.631868 | Pls1      |
| GO_CC_m1GO:1990393M compleç1/2589    | 4/23583  | 0.371984 | 0.670566 | 0.631868 | Ankra2    |
| GO_CC_m1GO:199074EARP comç1/2589     | 4/23583  | 0.371984 | 0.670566 | 0.631868 | Vps53     |
| GO_CC_m1GO:199085Wnt-Frizzlç1/2589   | 4/23583  | 0.371984 | 0.670566 | 0.631868 | Wnt3a     |



|                                        |           |          |          |          |              |
|----------------------------------------|-----------|----------|----------|----------|--------------|
| GO_CC_m1GO:00347Cchloride ch6/2589     | 45/23583  | 0.372691 | 0.67072  | 0.632013 | Ano1/Ano2    |
| GO_CC_m1GO:00432Cperikaryon 16/2589    | 132/23583 | 0.376555 | 0.676544 | 0.637501 | Bglap3/Cnq   |
| GO_CC_m1GO:000592connexin c3/2589      | 20/23583  | 0.378994 | 0.678663 | 0.639498 | Gja3/Gjb2/   |
| GO_CC_m1GO:000807guanylate c3/2589     | 20/23583  | 0.378994 | 0.678663 | 0.639498 | Adcy4/Guc    |
| GO_CC_m1GO:000593axoneme 14/2589       | 115/23583 | 0.383083 | 0.680528 | 0.641255 | Akap14/Cc    |
| GO_CC_m1GO:00313Cintegral coi5/2589    | 37/23583  | 0.383764 | 0.680528 | 0.641255 | Cox11/Mp     |
| GO_CC_m1GO:000015cytoplasmic 2/2589    | 12/23583  | 0.385722 | 0.680528 | 0.641255 | Cul2/El      |
| GO_CC_m1GO:000017nuclear exc 2/2589    | 12/23583  | 0.385722 | 0.680528 | 0.641255 | Exosc1/Exc   |
| GO_CC_m1GO:003091STAGA cor 2/2589      | 12/23583  | 0.385722 | 0.680528 | 0.641255 | Kat2a/Taf9   |
| GO_CC_m1GO:003123intrinsic coi2/2589   | 12/23583  | 0.385722 | 0.680528 | 0.641255 | Nf1/Syngap   |
| GO_CC_m1GO:003466endoplasmic 2/2589    | 12/23583  | 0.385722 | 0.680528 | 0.641255 | Hsp90b1/P    |
| GO_CC_m1GO:00424C nuclear inc 2/2589   | 12/23583  | 0.385722 | 0.680528 | 0.641255 | Nup153/Tp    |
| GO_CC_m1GO:009853ATPase de 2/2589      | 12/23583  | 0.385722 | 0.680528 | 0.641255 | Atp1b2/Slc   |
| GO_CC_m1GO:007046respiratory 11/2589   | 89/23583  | 0.386348 | 0.680528 | 0.641255 | Cox4i2/Co    |
| GO_CC_m1GO:000577vacuolar m21/2589     | 177/23583 | 0.387203 | 0.680921 | 0.641626 | Anxa2/Atp    |
| GO_CC_m1GO:00100C endosome 22/2589     | 186/23583 | 0.38878  | 0.682582 | 0.64319  | 3110002H1    |
| GO_CC_m1GO:00432C myelin she.25/2589   | 213/23583 | 0.392771 | 0.688468 | 0.648737 | Anxa2/Atp    |
| GO_CC_m1GO:009701ciliary plasr 14/2589 | 116/23583 | 0.395847 | 0.690882 | 0.651011 | Akap14/Cc    |
| GO_CC_m1GO:190255endoribon 4/2589      | 29/23583  | 0.396071 | 0.690882 | 0.651011 | Mir27a/Rp    |
| GO_CC_m1GO:190534endonucle 4/2589      | 29/23583  | 0.396071 | 0.690882 | 0.651011 | Mir27a/Rp    |
| GO_CC_m1GO:000587kinesin con 7/2589    | 55/23583  | 0.399978 | 0.696569 | 0.656371 | Kif23/Kif4/I |
| GO_CC_m1GO:00313C intrinsic coi5/2589  | 38/23583  | 0.406475 | 0.696971 | 0.656749 | Cox11/Mp     |
| GO_CC_m1GO:000569telomerase 3/2589     | 21/23583  | 0.410002 | 0.696971 | 0.656749 | Hmbox1/H     |
| GO_CC_m1GO:000558collagen tri10/2589   | 82/23583  | 0.412719 | 0.696971 | 0.656749 | C1ql1/C1q    |
| GO_CC_m1GO:000574mitochond 10/2589     | 82/23583  | 0.412719 | 0.696971 | 0.656749 | Cox4i2/Co    |
| GO_CC_m1GO:003283plasma me 19/2589     | 162/23583 | 0.416195 | 0.696971 | 0.656749 | Akap14/Ca    |
| GO_CC_m1GO:000577late endosc 21/2589   | 180/23583 | 0.418175 | 0.696971 | 0.656749 | 3110002H1    |
| GO_CC_m1GO:004517intercellula 7/2589   | 56/23583  | 0.418676 | 0.696971 | 0.656749 | Cdc7/Cenp    |
| GO_CC_m1GO:003228AMPA glut 4/2589      | 30/23583  | 0.421899 | 0.696971 | 0.656749 | Cacng5/Ca    |
| GO_CC_m1GO:003122intrinsic coi16/2589  | 136/23583 | 0.424184 | 0.696971 | 0.656749 | Acer3/Asp    |
| GO_CC_m1GO:000077condensed 2/2589      | 13/23583  | 0.425978 | 0.696971 | 0.656749 | Cenpa/Cer    |
| GO_CC_m1GO:000591fascia adhe 2/2589    | 13/23583  | 0.425978 | 0.696971 | 0.656749 | Cdh2/Des     |
| GO_CC_m1GO:001251trans-Golg 2/2589     | 13/23583  | 0.425978 | 0.696971 | 0.656749 | Ldlrap1/Ra   |
| GO_CC_m1GO:001658Sin3 compl 2/2589     | 13/23583  | 0.425978 | 0.696971 | 0.656749 | Hdac1/Hda    |
| GO_CC_m1GO:003159cytosolic pr 2/2589   | 13/23583  | 0.425978 | 0.696971 | 0.656749 | Psmc2/Psr    |
| GO_CC_m1GO:004432dendritic sr 2/2589   | 13/23583  | 0.425978 | 0.696971 | 0.656749 | Dnm3/Fmr     |
| GO_CC_m1GO:000574mitochond 6/2589      | 48/23583  | 0.43388  | 0.696971 | 0.656749 | Ndufa12/N    |
| GO_CC_m1GO:003096NADH deh 6/2589       | 48/23583  | 0.43388  | 0.696971 | 0.656749 | Ndufa12/N    |
| GO_CC_m1GO:004527respiratory 6/2589    | 48/23583  | 0.43388  | 0.696971 | 0.656749 | Ndufa12/N    |
| GO_CC_m1GO:00056C basal lamir 3/2589   | 22/23583  | 0.440513 | 0.696971 | 0.656749 | Ache/Lama    |
| GO_CC_m1GO:000572pericentric 3/2589    | 22/23583  | 0.440513 | 0.696971 | 0.656749 | Cenpa/Cer    |
| GO_CC_m1GO:000575mitochond 3/2589      | 22/23583  | 0.440513 | 0.696971 | 0.656749 | 2010107E0    |
| GO_CC_m1GO:006007inhibitory s3/2589    | 22/23583  | 0.440513 | 0.696971 | 0.656749 | Gphn/Maf1    |
| GO_CC_m1GO:007178endoplasm 3/2589      | 22/23583  | 0.440513 | 0.696971 | 0.656749 | Asph/Osbp    |
| GO_CC_m1GO:000001phosphopy 1/2589      | 5/23583   | 0.440941 | 0.696971 | 0.656749 | Eno3         |
| GO_CC_m1GO:000012RNA polyr 1/2589      | 5/23583   | 0.440941 | 0.696971 | 0.656749 | Tbp          |
| GO_CC_m1GO:000022vacuolar pr 1/2589    | 5/23583   | 0.440941 | 0.696971 | 0.656749 | Atp6v0c      |
| GO_CC_m1GO:000027mitochond 1/2589      | 5/23583   | 0.440941 | 0.696971 | 0.656749 | Atp5a1       |

|                   |               |         |           |          |          |          |            |
|-------------------|---------------|---------|-----------|----------|----------|----------|------------|
| GO_CC_m1GO:000140 | presequen     | 1/2589  | 5/23583   | 0.440941 | 0.696971 | 0.656749 | Grpel1     |
| GO_CC_m1GO:000208 | outer acros   | 1/2589  | 5/23583   | 0.440941 | 0.696971 | 0.656749 | Ift88      |
| GO_CC_m1GO:000564 | annulate la   | 1/2589  | 5/23583   | 0.440941 | 0.696971 | 0.656749 | Nup153     |
| GO_CC_m1GO:000566 | DNA replic    | 1/2589  | 5/23583   | 0.440941 | 0.696971 | 0.656749 | Rfc1       |
| GO_CC_m1GO:000587 | axonemal r    | 1/2589  | 5/23583   | 0.440941 | 0.696971 | 0.656749 | Saxo1      |
| GO_CC_m1GO:000596 | phosphory     | 1/2589  | 5/23583   | 0.440941 | 0.696971 | 0.656749 | Phkb       |
| GO_CC_m1GO:001628 | eukaryotic    | 1/2589  | 5/23583   | 0.440941 | 0.696971 | 0.656749 | Eif4e      |
| GO_CC_m1GO:001694 | insulin-like  | 1/2589  | 5/23583   | 0.440941 | 0.696971 | 0.656749 | Igfbp3     |
| GO_CC_m1GO:003012 | AP-4 adap     | 1/2589  | 5/23583   | 0.440941 | 0.696971 | 0.656749 | Ap4e1      |
| GO_CC_m1GO:003142 | box H/ACA     | 1/2589  | 5/23583   | 0.440941 | 0.696971 | 0.656749 | Nop10      |
| GO_CC_m1GO:003183 | haptoglobi    | 1/2589  | 5/23583   | 0.440941 | 0.696971 | 0.656749 | Hbb-bs     |
| GO_CC_m1GO:003364 | host intrac   | 1/2589  | 5/23583   | 0.440941 | 0.696971 | 0.656749 | Fmr1       |
| GO_CC_m1GO:003364 | host intrac   | 1/2589  | 5/23583   | 0.440941 | 0.696971 | 0.656749 | Fmr1       |
| GO_CC_m1GO:003645 | growth fac    | 1/2589  | 5/23583   | 0.440941 | 0.696971 | 0.656749 | Igfbp3     |
| GO_CC_m1GO:004282 | MHC class     | 1/2589  | 5/23583   | 0.440941 | 0.696971 | 0.656749 | Calr       |
| GO_CC_m1GO:004509 | type III inte | 1/2589  | 5/23583   | 0.440941 | 0.696971 | 0.656749 | Des        |
| GO_CC_m1GO:004526 | proton-tra    | 1/2589  | 5/23583   | 0.440941 | 0.696971 | 0.656749 | Atp5a1     |
| GO_CC_m1GO:004529 | mRNA edit     | 1/2589  | 5/23583   | 0.440941 | 0.696971 | 0.656749 | Virma      |
| GO_CC_m1GO:004529 | tubulin cor   | 1/2589  | 5/23583   | 0.440941 | 0.696971 | 0.656749 | Ttbk1      |
| GO_CC_m1GO:007052 | ERCC4-ER      | 1/2589  | 5/23583   | 0.440941 | 0.696971 | 0.656749 | Xrcc1      |
| GO_CC_m1GO:007143 | invadopod     | 1/2589  | 5/23583   | 0.440941 | 0.696971 | 0.656749 | Itga3      |
| GO_CC_m1GO:007181 | MMXD cor      | 1/2589  | 5/23583   | 0.440941 | 0.696971 | 0.656749 | Ciao1      |
| GO_CC_m1GO:007258 | box H/ACA     | 1/2589  | 5/23583   | 0.440941 | 0.696971 | 0.656749 | Nop10      |
| GO_CC_m1GO:009716 | AIM2 inflar   | 1/2589  | 5/23583   | 0.440941 | 0.696971 | 0.656749 | Pycard     |
| GO_CC_m1GO:009742 | tubular enc   | 1/2589  | 5/23583   | 0.440941 | 0.696971 | 0.656749 | Snx6       |
| GO_CC_m1GO:009744 | basal dend    | 1/2589  | 5/23583   | 0.440941 | 0.696971 | 0.656749 | Ykt6       |
| GO_CC_m1GO:009744 | sorting enc   | 1/2589  | 5/23583   | 0.440941 | 0.696971 | 0.656749 | Ptpn1      |
| GO_CC_m1GO:009884 | postsynapt    | 1/2589  | 5/23583   | 0.440941 | 0.696971 | 0.656749 | Dnm3       |
| GO_CC_m1GO:009906 | integral coi  | 1/2589  | 5/23583   | 0.440941 | 0.696971 | 0.656749 | Gria1      |
| GO_CC_m1GO:009914 | intrinsic coi | 1/2589  | 5/23583   | 0.440941 | 0.696971 | 0.656749 | Gria1      |
| GO_CC_m1GO:014000 | KICSTOR       | 1/2589  | 5/23583   | 0.440941 | 0.696971 | 0.656749 | Szt2       |
| GO_CC_m1GO:190334 | omegasom      | 1/2589  | 5/23583   | 0.440941 | 0.696971 | 0.656749 | Plekhf2    |
| GO_CC_m1GO:190343 | calcitonin f  | 1/2589  | 5/23583   | 0.440941 | 0.696971 | 0.656749 | Calcr      |
| GO_CC_m1GO:199011 | spermatop     | 1/2589  | 5/23583   | 0.440941 | 0.696971 | 0.656749 | Psme4      |
| GO_CC_m1GO:199024 | unipler cor   | 1/2589  | 5/23583   | 0.440941 | 0.696971 | 0.656749 | Micu2      |
| GO_CC_m1GO:199072 | Lsm1-7-P      | 1/2589  | 5/23583   | 0.440941 | 0.696971 | 0.656749 | Lsm5       |
| GO_CC_m1GO:001705 | transcriptic  | 10/2589 | 84/23583  | 0.443406 | 0.699842 | 0.659455 | Appl1/Bahc |
| GO_CC_m1GO:003470 | potassium     | 11/2589 | 93/23583  | 0.444641 | 0.700765 | 0.660324 | Kcna2/Kcna |
| GO_CC_m1GO:009956 | cytoplasmic   | 50/2589 | 444/23583 | 0.446359 | 0.702446 | 0.661908 | Akap14/An  |
| GO_CC_m1GO:000015 | nuclear ubi   | 5/2589  | 40/23583  | 0.451487 | 0.709479 | 0.668536 | Babam2/Cc  |
| GO_CC_m1GO:001632 | lateral plas  | 7/2589  | 58/23583  | 0.455869 | 0.715324 | 0.674043 | Cdh1/Cldn  |
| GO_CC_m1GO:001593 | small ribos   | 10/2589 | 85/23583  | 0.458694 | 0.717663 | 0.676248 | Fau/Mrpl42 |
| GO_CC_m1GO:003612 | sperm flag    | 13/2589 | 112/23583 | 0.45975  | 0.717663 | 0.676248 | Akap14/At  |
| GO_CC_m1GO:003017 | integral coi  | 15/2589 | 130/23583 | 0.45999  | 0.717663 | 0.676248 | Acer3/Aspl |
| GO_CC_m1GO:000172 | ruffle        | 16/2589 | 139/23583 | 0.460024 | 0.717663 | 0.676248 | Anxa2/Bcal |
| GO_CC_m1GO:004323 | receptor cc   | 42/2589 | 374/23583 | 0.462359 | 0.720265 | 0.678699 | Adcyap1r1. |
| GO_CC_m1GO:000576 | secondary     | 2/2589  | 14/23583  | 0.464803 | 0.720946 | 0.67934  | Adam8/Cr   |
| GO_CC_m1GO:003327 | transcriptic  | 2/2589  | 14/23583  | 0.464803 | 0.720946 | 0.67934  | Kat2a/Taf9 |

|                                |         |           |          |          |          |             |
|--------------------------------|---------|-----------|----------|----------|----------|-------------|
| GO_CC_m1GO:00356εsperm fibr    | 2/2589  | 14/23583  | 0.464803 | 0.720946 | 0.67934  | Akap14/Ld   |
| GO_CC_m1GO:000584ribosome      | 31/2589 | 275/23583 | 0.46624  | 0.722013 | 0.680347 | Canx/Fau/I  |
| GO_CC_m1GO:000017exosome (f    | 3/2589  | 23/23583  | 0.470392 | 0.722013 | 0.680347 | Exosc1/Exc  |
| GO_CC_m1GO:004261MHC prote     | 3/2589  | 23/23583  | 0.470392 | 0.722013 | 0.680347 | H2-DMb2/    |
| GO_CC_m1GO:00452εproton-tra    | 3/2589  | 23/23583  | 0.470392 | 0.722013 | 0.680347 | 2010107E0   |
| GO_CC_m1GO:19053εexoribonuc    | 3/2589  | 23/23583  | 0.470392 | 0.722013 | 0.680347 | Exosc1/Exc  |
| GO_CC_m1GO:0097729+2 motile    | 13/2589 | 114/23583 | 0.486227 | 0.722013 | 0.680347 | Akap14/At   |
| GO_CC_m1GO:00163εnuclear ma    | 10/2589 | 87/23583  | 0.48905  | 0.722013 | 0.680347 | Ahctf1/Alo  |
| GO_CC_m1GO:003067synaptic ve   | 10/2589 | 87/23583  | 0.48905  | 0.722013 | 0.680347 | Adra1d/Oli  |
| GO_CC_m1GO:00995C exocytic ve  | 10/2589 | 87/23583  | 0.48905  | 0.722013 | 0.680347 | Adra1d/Oli  |
| GO_CC_m1GO:00444εvacuolar p    | 21/2589 | 187/23583 | 0.490675 | 0.722013 | 0.680347 | Anxa2/Atp   |
| GO_CC_m1GO:000591adherens j    | 32/2589 | 287/23583 | 0.490916 | 0.722013 | 0.680347 | Aif1l/Anxa2 |
| GO_CC_m1GO:00306εcoated ves    | 8/2589  | 69/23583  | 0.491277 | 0.722013 | 0.680347 | Copg2/Ldl   |
| GO_CC_m1GO:003152brush bord    | 8/2589  | 69/23583  | 0.491277 | 0.722013 | 0.680347 | Abcb1a/At   |
| GO_CC_m1GO:00321εcell divisio  | 8/2589  | 69/23583  | 0.491277 | 0.722013 | 0.680347 | Cenpc1/M    |
| GO_CC_m1GO:00312C SNARE con    | 6/2589  | 51/23583  | 0.493947 | 0.722013 | 0.680347 | Snap29/St   |
| GO_CC_m1GO:001632apical plas   | 34/2589 | 306/23583 | 0.497518 | 0.722013 | 0.680347 | Abcb1a/Ac   |
| GO_CC_m1GO:00350εmicro-ribo    | 13/2589 | 115/23583 | 0.499373 | 0.722013 | 0.680347 | Mir16-1/M   |
| GO_CC_m1GO:00164εmyosin II c   | 3/2589  | 24/23583  | 0.499524 | 0.722013 | 0.680347 | Myh14/My    |
| GO_CC_m1GO:00007εchromosom     | 12/2589 | 106/23583 | 0.500806 | 0.722013 | 0.680347 | Blm/Terb1   |
| GO_CC_m1GO:000017cytoplasm     | 2/2589  | 15/23583  | 0.502024 | 0.722013 | 0.680347 | Exosc9/Pn   |
| GO_CC_m1GO:003101Ino80 com     | 2/2589  | 15/23583  | 0.502024 | 0.722013 | 0.680347 | Gm3086/N    |
| GO_CC_m1GO:004257DNA polyn     | 2/2589  | 15/23583  | 0.502024 | 0.722013 | 0.680347 | Pole/Polg   |
| GO_CC_m1GO:00431εP granule     | 2/2589  | 15/23583  | 0.502024 | 0.722013 | 0.680347 | Ddx4/Mael   |
| GO_CC_m1GO:00454εpole plasm    | 2/2589  | 15/23583  | 0.502024 | 0.722013 | 0.680347 | Ddx4/Mael   |
| GO_CC_m1GO:00602εgerm plasm    | 2/2589  | 15/23583  | 0.502024 | 0.722013 | 0.680347 | Ddx4/Mael   |
| GO_CC_m1GO:000012transcripti   | 1/2589  | 6/23583   | 0.502328 | 0.722013 | 0.680347 | Gtf3c3      |
| GO_CC_m1GO:00017εsex chrom     | ε1/2589 | 6/23583   | 0.502328 | 0.722013 | 0.680347 | Ring1       |
| GO_CC_m1GO:00055εcollagen ty   | 1/2589  | 6/23583   | 0.502328 | 0.722013 | 0.680347 | Col4a2      |
| GO_CC_m1GO:000572perichrom     | ε1/2589 | 6/23583   | 0.502328 | 0.722013 | 0.680347 | Clock       |
| GO_CC_m1GO:001601sarcoglyca    | 1/2589  | 6/23583   | 0.502328 | 0.722013 | 0.680347 | Sgcz        |
| GO_CC_m1GO:00300εmitochond     | 1/2589  | 6/23583   | 0.502328 | 0.722013 | 0.680347 | Bckdhb      |
| GO_CC_m1GO:003012AP-1 adap     | 1/2589  | 6/23583   | 0.502328 | 0.722013 | 0.680347 | Ldlrap1     |
| GO_CC_m1GO:00308εcheckpoint    | 1/2589  | 6/23583   | 0.502328 | 0.722013 | 0.680347 | Rad9b       |
| GO_CC_m1GO:00312εdeath-ind     | 1/2589  | 6/23583   | 0.502328 | 0.722013 | 0.680347 | Casp8       |
| GO_CC_m1GO:003142box C/D sn    | 1/2589  | 6/23583   | 0.502328 | 0.722013 | 0.680347 | Nop56       |
| GO_CC_m1GO:00314εCul5-RING     | 1/2589  | 6/23583   | 0.502328 | 0.722013 | 0.680347 | Arih2       |
| GO_CC_m1GO:00424C extrinsic co | 1/2589  | 6/23583   | 0.502328 | 0.722013 | 0.680347 | Zc3h12a     |
| GO_CC_m1GO:004272mitochond     | 1/2589  | 6/23583   | 0.502328 | 0.722013 | 0.680347 | Timm22      |
| GO_CC_m1GO:004432dendritic s   | 1/2589  | 6/23583   | 0.502328 | 0.722013 | 0.680347 | Fmr1        |
| GO_CC_m1GO:00482εrough end     | 1/2589  | 6/23583   | 0.502328 | 0.722013 | 0.680347 | Lyz1        |
| GO_CC_m1GO:00487εcytoskelet    | 1/2589  | 6/23583   | 0.502328 | 0.722013 | 0.680347 | Rims3       |
| GO_CC_m1GO:00705εBRISC com     | 1/2589  | 6/23583   | 0.502328 | 0.722013 | 0.680347 | Babam2      |
| GO_CC_m1GO:007077H3 histone    | 1/2589  | 6/23583   | 0.502328 | 0.722013 | 0.680347 | Brpf3       |
| GO_CC_m1GO:007077MOZ/MOR       | 1/2589  | 6/23583   | 0.502328 | 0.722013 | 0.680347 | Brpf3       |
| GO_CC_m1GO:00712C histone pr   | ε1/2589 | 6/23583   | 0.502328 | 0.722013 | 0.680347 | Eri1        |
| GO_CC_m1GO:00897C U2AF         | 1/2589  | 6/23583   | 0.502328 | 0.722013 | 0.680347 | Zrsr2       |
| GO_CC_m1GO:009072central reg   | 1/2589  | 6/23583   | 0.502328 | 0.722013 | 0.680347 | Pafah1b1    |

|                   |                      |           |          |          |          |             |
|-------------------|----------------------|-----------|----------|----------|----------|-------------|
| GO_CC_m1GO:009741 | Lewy body 1/2589     | 6/23583   | 0.502328 | 0.722013 | 0.680347 | Gpx1        |
| GO_CC_m1GO:009742 | microtubul 1/2589    | 6/23583   | 0.502328 | 0.722013 | 0.680347 | Tppp3       |
| GO_CC_m1GO:009864 | network-fc 1/2589    | 6/23583   | 0.502328 | 0.722013 | 0.680347 | Col4a2      |
| GO_CC_m1GO:009864 | collagen nε 1/2589   | 6/23583   | 0.502328 | 0.722013 | 0.680347 | Col4a2      |
| GO_CC_m1GO:009865 | basement r 1/2589    | 6/23583   | 0.502328 | 0.722013 | 0.680347 | Col4a2      |
| GO_CC_m1GO:199007 | periciliary r 1/2589 | 6/23583   | 0.502328 | 0.722013 | 0.680347 | Kifap3      |
| GO_CC_m1GO:199013 | GATOR1 cc 1/2589     | 6/23583   | 0.502328 | 0.722013 | 0.680347 | Szt2        |
| GO_CC_m1GO:199045 | L-type volt 1/2589   | 6/23583   | 0.502328 | 0.722013 | 0.680347 | Cacnb2      |
| GO_CC_m1GO:000012 | histone acε 9/2589   | 79/23583  | 0.505982 | 0.726296 | 0.684382 | Brpf3/Gm3   |
| GO_CC_m1GO:000577 | autophago 8/2589     | 70/23583  | 0.50813  | 0.72841  | 0.686374 | Plekhf2/Ra  |
| GO_CC_m1GO:000011 | histone de: 7/2589   | 61/23583  | 0.510599 | 0.730977 | 0.688793 | Appl1/Hda   |
| GO_CC_m1GO:009773 | photorecep 12/2589   | 107/23583 | 0.514407 | 0.735452 | 0.69301  | Fam161a/F   |
| GO_CC_m1GO:004444 | axoneme p 4/2589     | 34/23583  | 0.521585 | 0.743741 | 0.70082  | Dnah1/Dna   |
| GO_CC_m1GO:009883 | postsynapt 4/2589    | 34/23583  | 0.521585 | 0.743741 | 0.70082  | Cacng5/Ca   |
| GO_CC_m1GO:004444 | cell cortex 20/2589  | 181/23583 | 0.523047 | 0.744841 | 0.701857 | Asph/Cdh1   |
| GO_CC_m1GO:003280 | carboxy-te 3/2589    | 25/23583  | 0.527816 | 0.749652 | 0.70639  | Cdk7/Ercc5  |
| GO_CC_m1GO:004533 | clathrin-co 3/2589   | 25/23583  | 0.527816 | 0.749652 | 0.70639  | Cpne6/Ctla  |
| GO_CC_m1GO:003011 | membrane 11/2589     | 99/23583  | 0.530657 | 0.751706 | 0.708326 | Ap1s2/Ap4   |
| GO_CC_m1GO:004847 | coated me 11/2589    | 99/23583  | 0.530657 | 0.751706 | 0.708326 | Ap1s2/Ap4   |
| GO_CC_m1GO:009880 | respiratory 9/2589   | 81/23583  | 0.537235 | 0.754498 | 0.710956 | Cox4i2/Nd   |
| GO_CC_m1GO:000566 | DNA-direc 2/2589     | 16/23583  | 0.537527 | 0.754498 | 0.710956 | Polr2f/Polr |
| GO_CC_m1GO:003152 | filopodium 2/2589    | 16/23583  | 0.537527 | 0.754498 | 0.710956 | Antxr1/Itgα |
| GO_CC_m1GO:003585 | Seh1-assoc 2/2589    | 16/23583  | 0.537527 | 0.754498 | 0.710956 | Szt2/Wdr2   |
| GO_CC_m1GO:004319 | axon initial 2/2589  | 16/23583  | 0.537527 | 0.754498 | 0.710956 | Kcnq2/Kcn   |
| GO_CC_m1GO:006170 | inflammasc 2/2589    | 16/23583  | 0.537527 | 0.754498 | 0.710956 | Gsdmd/Pyc   |
| GO_CC_m1GO:007082 | Sin3-type ε 2/2589   | 16/23583  | 0.537527 | 0.754498 | 0.710956 | Hdac1/Hda   |
| GO_CC_m1GO:001660 | nuclear spe 33/2589  | 302/23583 | 0.538989 | 0.755565 | 0.711962 | Virma/Basf  |
| GO_CC_m1GO:007060 | SWI/SNF st 8/2589    | 72/23583  | 0.541262 | 0.756853 | 0.713176 | Appl1/Baz1  |
| GO_CC_m1GO:000818 | COP9 sign: 4/2589    | 35/23583  | 0.545235 | 0.756853 | 0.713176 | Atp5a1/Ba   |
| GO_CC_m1GO:008000 | Cul4-RING 4/2589     | 35/23583  | 0.545235 | 0.756853 | 0.713176 | Cul4a/Dcaf  |
| GO_CC_m1GO:000078 | condensed 3/2589     | 26/23583  | 0.555193 | 0.756853 | 0.713176 | Cenpa/Cer   |
| GO_CC_m1GO:003158 | nucleotide 3/2589    | 26/23583  | 0.555193 | 0.756853 | 0.713176 | Gm14147/1   |
| GO_CC_m1GO:000043 | core TFIIH 1/2589    | 7/23583   | 0.556978 | 0.756853 | 0.713176 | Gtf2h3      |
| GO_CC_m1GO:000557 | membrane 1/2589      | 7/23583   | 0.556978 | 0.756853 | 0.713176 | C7          |
| GO_CC_m1GO:000565 | nucleolar ri 1/2589  | 7/23583   | 0.556978 | 0.756853 | 0.713176 | Rpp40       |
| GO_CC_m1GO:001601 | dystroglycε 1/2589   | 7/23583   | 0.556978 | 0.756853 | 0.713176 | Sgcz        |
| GO_CC_m1GO:001627 | prefoldin c 1/2589   | 7/23583   | 0.556978 | 0.756853 | 0.713176 | Pdrg1       |
| GO_CC_m1GO:001990 | cyclin-depε 1/2589   | 7/23583   | 0.556978 | 0.756853 | 0.713176 | Cdk7        |
| GO_CC_m1GO:003047 | actin cortic 1/2589  | 7/23583   | 0.556978 | 0.756853 | 0.713176 | Wipf1       |
| GO_CC_m1GO:003067 | phagocytic 1/2589    | 7/23583   | 0.556978 | 0.756853 | 0.713176 | Anxa3       |
| GO_CC_m1GO:003325 | I-kappaB/1 1/2589    | 7/23583   | 0.556978 | 0.756853 | 0.713176 | Nfkb1       |
| GO_CC_m1GO:003503 | phosphatic 1/2589    | 7/23583   | 0.556978 | 0.756853 | 0.713176 | Pik3r4      |
| GO_CC_m1GO:004430 | cerebellar r 1/2589  | 7/23583   | 0.556978 | 0.756853 | 0.713176 | Syde1       |
| GO_CC_m1GO:006164 | endocytic r 1/2589   | 7/23583   | 0.556978 | 0.756853 | 0.713176 | Wipf1       |
| GO_CC_m1GO:007018 | shelterin cc 1/2589  | 7/23583   | 0.556978 | 0.756853 | 0.713176 | Terb1       |
| GO_CC_m1GO:007154 | pi-body 1/2589       | 7/23583   | 0.556978 | 0.756853 | 0.713176 | Ddx4        |
| GO_CC_m1GO:009057 | RNA polyr 1/2589     | 7/23583   | 0.556978 | 0.756853 | 0.713176 | Hdac2       |
| GO_CC_m1GO:009725 | R2TP comε 1/2589     | 7/23583   | 0.556978 | 0.756853 | 0.713176 | Gm3086      |

|                                                |           |          |          |          |             |
|------------------------------------------------|-----------|----------|----------|----------|-------------|
| GO_CC_m1GO:009956 presynaptic1/2589            | 7/23583   | 0.556978 | 0.756853 | 0.713176 | Rims3       |
| GO_CC_m1GO:199046 omegasom1/2589               | 7/23583   | 0.556978 | 0.756853 | 0.713176 | Plekhf2     |
| GO_CC_m1GO:199091 sperm head1/2589             | 7/23583   | 0.556978 | 0.756853 | 0.713176 | Adam4       |
| GO_CC_m1GO:000828 protein ser5/2589            | 45/23583  | 0.558864 | 0.756853 | 0.713176 | 2810408A1   |
| GO_CC_m1GO:012011 neuron prc5/2589             | 45/23583  | 0.558864 | 0.756853 | 0.713176 | Camk2a/Ca   |
| GO_CC_m1GO:190329 phosphatase5/2589            | 45/23583  | 0.558864 | 0.756853 | 0.713176 | 2810408A1   |
| GO_CC_m1GO:009752 spliceosome7/2589            | 64/23583  | 0.563286 | 0.761443 | 0.7175   | Lsm5/Naa3   |
| GO_CC_m1GO:004319 terminal bc13/2589           | 120/23583 | 0.563665 | 0.761443 | 0.7175   | Adora1/Frr  |
| GO_CC_m1GO:004533 phagocytic9/2589             | 83/23583  | 0.56773  | 0.762124 | 0.718143 | Adam8/An    |
| GO_CC_m1GO:000589 voltage-gate4/2589           | 36/23583  | 0.568263 | 0.762124 | 0.718143 | Cacnb2/Ca   |
| GO_CC_m1GO:000561 interstitial r2/2589         | 17/23583  | 0.57124  | 0.762124 | 0.718143 | 2300002M:   |
| GO_CC_m1GO:000584 mRNA clea2/2589              | 17/23583  | 0.57124  | 0.762124 | 0.718143 | Cpsf2/Cpsf  |
| GO_CC_m1GO:000589 acetylcholin2/2589           | 17/23583  | 0.57124  | 0.762124 | 0.718143 | Chrne/Chrn  |
| GO_CC_m1GO:001601 dystrophin 2/2589            | 17/23583  | 0.57124  | 0.762124 | 0.718143 | Cav3/Sgcz   |
| GO_CC_m1GO:006182 sperm head2/2589             | 17/23583  | 0.57124  | 0.762124 | 0.718143 | Adam4/Tac   |
| GO_CC_m1GO:007100 U2-type pr2/2589             | 17/23583  | 0.57124  | 0.762124 | 0.718143 | Naa38/Snrp  |
| GO_CC_m1GO:009066 glycoprotein 2/2589          | 17/23583  | 0.57124  | 0.762124 | 0.718143 | Cav3/Sgcz   |
| GO_CC_m1GO:009864 complex of2/2589             | 17/23583  | 0.57124  | 0.762124 | 0.718143 | Col4a2/Col  |
| GO_CC_m1GO:004445 mitochondrion23/2589         | 214/23583 | 0.575777 | 0.767229 | 0.722952 | 2010107E0   |
| GO_CC_m1GO:000079 nuclear chromosome42/2589    | 390/23583 | 0.577312 | 0.768323 | 0.723984 | Appl1/Aptb  |
| GO_CC_m1GO:003259 dendrite m5/2589             | 46/23583  | 0.579075 | 0.768772 | 0.724407 | Gabra6/Gri  |
| GO_CC_m1GO:006017 ciliary membrane5/2589       | 46/23583  | 0.579075 | 0.768772 | 0.724407 | Drd5/Prckl  |
| GO_CC_m1GO:009773 9+0 non-n12/2589             | 112/23583 | 0.580568 | 0.769806 | 0.725381 | Fam161a/F   |
| GO_CC_m1GO:000593 cell cortex 31/2589          | 290/23583 | 0.590928 | 0.77815  | 0.733243 | Anxa2/Asp   |
| GO_CC_m1GO:004517 basal part 7/2589            | 66/23583  | 0.596925 | 0.77815  | 0.733243 | Cav1/Erbp1  |
| GO_CC_m1GO:003151 motile cilium19/2589         | 179/23583 | 0.597661 | 0.77815  | 0.733243 | Akap14/Atg  |
| GO_CC_m1GO:000575 mitochondrion2/2589          | 18/23583  | 0.603127 | 0.77815  | 0.733243 | Cox4i2/Ucp  |
| GO_CC_m1GO:001647 vacuolar protein2/2589       | 18/23583  | 0.603127 | 0.77815  | 0.733243 | Atp6v0c/Tc  |
| GO_CC_m1GO:003013 clathrin coat2/2589          | 18/23583  | 0.603127 | 0.77815  | 0.733243 | Ldlrap1/Syl |
| GO_CC_m1GO:000080 origin replication1/2589     | 8/23583   | 0.605628 | 0.77815  | 0.733243 | Orc1        |
| GO_CC_m1GO:000566 nuclear origin1/2589         | 8/23583   | 0.605628 | 0.77815  | 0.733243 | Orc1        |
| GO_CC_m1GO:000567 chromatin 1/2589             | 8/23583   | 0.605628 | 0.77815  | 0.733243 | Bahd1       |
| GO_CC_m1GO:000568 U6 snRNP 1/2589              | 8/23583   | 0.605628 | 0.77815  | 0.733243 | Lsm5        |
| GO_CC_m1GO:000589 sodium:potassium1/2589       | 8/23583   | 0.605628 | 0.77815  | 0.733243 | Atp1b2      |
| GO_CC_m1GO:003031 junctional r1/2589           | 8/23583   | 0.605628 | 0.77815  | 0.733243 | Jph3        |
| GO_CC_m1GO:003099 intraciliary 1/2589          | 8/23583   | 0.605628 | 0.77815  | 0.733243 | Tulp3       |
| GO_CC_m1GO:003125 lamellipodium1/2589          | 8/23583   | 0.605628 | 0.77815  | 0.733243 | Antxr1      |
| GO_CC_m1GO:003131 extrinsic coat1/2589         | 8/23583   | 0.605628 | 0.77815  | 0.733243 | Usp8        |
| GO_CC_m1GO:003259 insulin-resistance1/2589     | 8/23583   | 0.605628 | 0.77815  | 0.733243 | Dennd4c     |
| GO_CC_m1GO:003446 BBSome 1/2589                | 8/23583   | 0.605628 | 0.77815  | 0.733243 | Bbs2        |
| GO_CC_m1GO:003803 G-protein 1/2589             | 8/23583   | 0.605628 | 0.77815  | 0.733243 | Calcr       |
| GO_CC_m1GO:004525 pyruvate dehydrogenase1/2589 | 8/23583   | 0.605628 | 0.77815  | 0.733243 | Pdhb        |
| GO_CC_m1GO:007041 nonhomologous1/2589          | 8/23583   | 0.605628 | 0.77815  | 0.733243 | Prkdc       |
| GO_CC_m1GO:007154 eukaryotic 1/2589            | 8/23583   | 0.605628 | 0.77815  | 0.733243 | Eif3f       |
| GO_CC_m1GO:007159 neuronal ribosome1/2589      | 8/23583   | 0.605628 | 0.77815  | 0.733243 | Fmr1        |
| GO_CC_m1GO:009057 RNA polymerase1/2589         | 8/23583   | 0.605628 | 0.77815  | 0.733243 | Gtf3c3      |
| GO_CC_m1GO:009764 G-protein 1/2589             | 8/23583   | 0.605628 | 0.77815  | 0.733243 | Calcr       |
| GO_CC_m1GO:009884 postsynaptic1/2589           | 8/23583   | 0.605628 | 0.77815  | 0.733243 | Rab5a       |

|                                      |           |          |          |          |             |
|--------------------------------------|-----------|----------|----------|----------|-------------|
| GO_CC_m1GO:190411axon cytop1/2589    | 8/23583   | 0.605628 | 0.77815  | 0.733243 | Ranbp1      |
| GO_CC_m1GO:003258neuron prc7/2589    | 67/23583  | 0.613234 | 0.786984 | 0.741568 | Adora1/Ga   |
| GO_CC_m1GO:009773non-motile15/2589   | 143/23583 | 0.614085 | 0.787138 | 0.741713 | Ano2/Drd5   |
| GO_CC_m1GO:000584polysome 8/2589     | 77/23583  | 0.619758 | 0.792609 | 0.746869 | Calr/Fmr1/  |
| GO_CC_m1GO:007016anchoring 32/2589   | 303/23583 | 0.619824 | 0.792609 | 0.746869 | Aif1l/Anxa2 |
| GO_CC_m1GO:004665anchored c6/2589    | 58/23583  | 0.623627 | 0.796529 | 0.750562 | Car15/Folr1 |
| GO_CC_m1GO:003259integral coi7/2589  | 68/23583  | 0.629181 | 0.800261 | 0.754078 | Bnip3/Cox3  |
| GO_CC_m1GO:000989external sic52/2589 | 491/23583 | 0.630982 | 0.800261 | 0.754078 | Adam4/An    |
| GO_CC_m1GO:001634catenin cor3/2589   | 29/23583  | 0.631315 | 0.800261 | 0.754078 | Cdh1/Cdh2   |
| GO_CC_m1GO:000015protein phc2/2589   | 19/23583  | 0.633184 | 0.800261 | 0.754078 | Ppp2r1a/Pi  |
| GO_CC_m1GO:000584mRNA clea2/2589     | 19/23583  | 0.633184 | 0.800261 | 0.754078 | Cpsf2/Cpsf  |
| GO_CC_m1GO:003203integrator t2/2589  | 19/23583  | 0.633184 | 0.800261 | 0.754078 | Esrrb/Ints8 |
| GO_CC_m1GO:009072growth cor2/2589    | 19/23583  | 0.633184 | 0.800261 | 0.754078 | Fmr1/Pafah  |
| GO_CC_m1GO:190271GABA-A re2/2589     | 19/23583  | 0.633184 | 0.800261 | 0.754078 | Gabra6/Ga   |
| GO_CC_m1GO:004429axonal gro4/2589    | 39/23583  | 0.63323  | 0.800261 | 0.754078 | Aatk/Fmr1/  |
| GO_CC_m1GO:001646proton-tra5/2589    | 49/23583  | 0.636577 | 0.803548 | 0.757176 | 2010107E0   |
| GO_CC_m1GO:004329apical junct14/2589 | 136/23583 | 0.641593 | 0.805012 | 0.758555 | Adcyap1r1.  |
| GO_CC_m1GO:000013Golgi trans1/2589   | 9/23583   | 0.648938 | 0.805012 | 0.758555 | St6gal1     |
| GO_CC_m1GO:000053glycosylphc1/2589   | 9/23583   | 0.648938 | 0.805012 | 0.758555 | Pigyl       |
| GO_CC_m1GO:000081Swr1 comp1/2589     | 9/23583   | 0.648938 | 0.805012 | 0.758555 | Gm3086      |
| GO_CC_m1GO:000081ESCRT III c1/2589   | 9/23583   | 0.648938 | 0.805012 | 0.758555 | Chmp1b      |
| GO_CC_m1GO:000583hemoglobi1/2589     | 9/23583   | 0.648938 | 0.805012 | 0.758555 | Hbb-bs      |
| GO_CC_m1GO:000586dynactin cc1/2589   | 9/23583   | 0.648938 | 0.805012 | 0.758555 | Dctn5       |
| GO_CC_m1GO:000838kappaB kir1/2589    | 9/23583   | 0.648938 | 0.805012 | 0.758555 | Pycard      |
| GO_CC_m1GO:000854proteasom1/2589     | 9/23583   | 0.648938 | 0.805012 | 0.758555 | Psmd8       |
| GO_CC_m1GO:003129replication 1/2589  | 9/23583   | 0.648938 | 0.805012 | 0.758555 | Tipin       |
| GO_CC_m1GO:003317proton-tra1/2589    | 9/23583   | 0.648938 | 0.805012 | 0.758555 | Atp6v0c     |
| GO_CC_m1GO:009751cardiac my1/2589    | 9/23583   | 0.648938 | 0.805012 | 0.758555 | Des         |
| GO_CC_m1GO:009855cytoplasmic1/2589   | 9/23583   | 0.648938 | 0.805012 | 0.758555 | Ptpn1       |
| GO_CC_m1GO:009883presynaptic1/2589   | 9/23583   | 0.648938 | 0.805012 | 0.758555 | Rims3       |
| GO_CC_m1GO:19909C Wnt signal1/2589   | 9/23583   | 0.648938 | 0.805012 | 0.758555 | Wnt3a       |
| GO_CC_m1GO:006007excitatory c4/2589  | 40/23583  | 0.653424 | 0.809645 | 0.762921 | Gria1/Itga3 |
| GO_CC_m1GO:009722sperm prin3/2589    | 30/23583  | 0.654583 | 0.81015  | 0.763397 | Atp2b4/lft1 |
| GO_CC_m1GO:000586cytoplasmic7/2589   | 70/23583  | 0.659931 | 0.81302  | 0.766101 | Bcas3/Fam   |
| GO_CC_m1GO:003053small nucle7/2589   | 70/23583  | 0.659931 | 0.81302  | 0.766101 | Lsm5/Naa3   |
| GO_CC_m1GO:009857intrinsic coi7/2589 | 70/23583  | 0.659931 | 0.81302  | 0.766101 | Bnip3/Cox3  |
| GO_CC_m1GO:000024pericentrio2/2589   | 20/23583  | 0.661427 | 0.81302  | 0.766101 | Nek1/Tubg   |
| GO_CC_m1GO:003136anchored c2/2589    | 20/23583  | 0.661427 | 0.81302  | 0.766101 | Folr2/Hyal2 |
| GO_CC_m1GO:004527respiratory 2/2589  | 20/23583  | 0.661427 | 0.81302  | 0.766101 | Cox4i2/Uqr  |
| GO_CC_m1GO:003012vesicle coa5/2589   | 51/23583  | 0.672092 | 0.823029 | 0.775532 | Copg2/Ldlr  |
| GO_CC_m1GO:001986outer mem19/2589    | 187/23583 | 0.674642 | 0.823029 | 0.775532 | Acsl1/Aifm  |
| GO_CC_m1GO:003196organelle c19/2589  | 187/23583 | 0.674642 | 0.823029 | 0.775532 | Acsl1/Aifm  |
| GO_CC_m1GO:000032lytic vacuol45/2589 | 433/23583 | 0.675689 | 0.823029 | 0.775532 | 3110002H1   |
| GO_CC_m1GO:000576lysosome 45/2589    | 433/23583 | 0.675689 | 0.823029 | 0.775532 | 3110002H1   |
| GO_CC_m1GO:003283dendrite cy3/2589   | 31/23583  | 0.676777 | 0.823029 | 0.775532 | Camk2a/Ca   |
| GO_CC_m1GO:000588neurofilam1/2589    | 10/23583  | 0.687493 | 0.823029 | 0.775532 | Ldlrap1     |
| GO_CC_m1GO:003005hemidesm1/2589      | 10/23583  | 0.687493 | 0.823029 | 0.775532 | Itga6       |
| GO_CC_m1GO:003013clathrin coi1/2589  | 10/23583  | 0.687493 | 0.823029 | 0.775532 | Ldlrap1     |

|                                                |           |          |          |          |            |
|------------------------------------------------|-----------|----------|----------|----------|------------|
| GO_CC_m1GO:003068multimeric 1/2589             | 10/23583  | 0.687493 | 0.823029 | 0.775532 | Rpp40      |
| GO_CC_m1GO:003101ISWI-type 1/2589              | 10/23583  | 0.687493 | 0.823029 | 0.775532 | Baz1a      |
| GO_CC_m1GO:003108nuclear pore 1/2589           | 10/23583  | 0.687493 | 0.823029 | 0.775532 | Ahctf1     |
| GO_CC_m1GO:003470methylosome 1/2589            | 10/23583  | 0.687493 | 0.823029 | 0.775532 | Prmt1      |
| GO_CC_m1GO:004422juxtaparaneuronal 1/2589      | 10/23583  | 0.687493 | 0.823029 | 0.775532 | Kcna2      |
| GO_CC_m1GO:004658intercellular junction 1/2589 | 10/23583  | 0.687493 | 0.823029 | 0.775532 | Abcb1a     |
| GO_CC_m1GO:005128cell tip 1/2589               | 10/23583  | 0.687493 | 0.823029 | 0.775532 | Ezr        |
| GO_CC_m1GO:006009kinocilium 1/2589             | 10/23583  | 0.687493 | 0.823029 | 0.775532 | Ift88      |
| GO_CC_m1GO:0097739+2 non-nucleolar 1/2589      | 10/23583  | 0.687493 | 0.823029 | 0.775532 | Ift88      |
| GO_CC_m1GO:000042autophagosome 2/2589          | 21/23583  | 0.687893 | 0.823029 | 0.775532 | Rpn2/Vmp   |
| GO_CC_m1GO:000568anaphase-plate 2/2589         | 21/23583  | 0.687893 | 0.823029 | 0.775532 | Cdc20/Cdc  |
| GO_CC_m1GO:000568U2 snRNP 2/2589               | 21/23583  | 0.687893 | 0.823029 | 0.775532 | Naa38/Snrp |
| GO_CC_m1GO:003514exon-exon junction 2/2589     | 21/23583  | 0.687893 | 0.823029 | 0.775532 | Magohb/R   |
| GO_CC_m1GO:009734INO80-type 2/2589             | 21/23583  | 0.687893 | 0.823029 | 0.775532 | Gm3086/N   |
| GO_CC_m1GO:190271GABA receptor 2/2589          | 21/23583  | 0.687893 | 0.823029 | 0.775532 | Gabra6/Ga  |
| GO_CC_m1GO:000568spliceosome 20/2589           | 199/23583 | 0.696053 | 0.831305 | 0.783331 | Cactin/Ddx |
| GO_CC_m1GO:000077condensed chromatin 3/2589    | 32/23583  | 0.697896 | 0.831305 | 0.783331 | Ahctf1/Cer |
| GO_CC_m1GO:000588striated muscle 3/2589        | 32/23583  | 0.697896 | 0.831305 | 0.783331 | Acta1/Tmo  |
| GO_CC_m1GO:007006cytochrome 3/2589             | 32/23583  | 0.697896 | 0.831305 | 0.783331 | Cox15/Cox  |
| GO_CC_m1GO:000591cell-cell adhesion 12/2589    | 122/23583 | 0.69944  | 0.832225 | 0.784198 | Anxa2/Cad  |
| GO_CC_m1GO:000832ionotropic receptor 5/2589    | 53/23583  | 0.705232 | 0.833102 | 0.785024 | Cacng5/Ca  |
| GO_CC_m1GO:000588intermediate filament 12/2589 | 123/23583 | 0.710116 | 0.833102 | 0.785024 | Des/Fbf1/K |
| GO_CC_m1GO:000568U1 snRNP 2/2589               | 22/23583  | 0.712631 | 0.833102 | 0.785024 | Naa38/Snrp |
| GO_CC_m1GO:000579Golgi medial 2/2589           | 22/23583  | 0.712631 | 0.833102 | 0.785024 | H2-Q2/St6  |
| GO_CC_m1GO:003068endocytic vesicle 2/2589      | 22/23583  | 0.712631 | 0.833102 | 0.785024 | Anxa3/Ldlr |
| GO_CC_m1GO:007101prespliceosome 2/2589         | 22/23583  | 0.712631 | 0.833102 | 0.785024 | Naa38/Snrp |
| GO_CC_m1GO:000010nucleotide 1/2589             | 11/23583  | 0.721816 | 0.833102 | 0.785024 | Xrcc1      |
| GO_CC_m1GO:000078telomere cap 1/2589           | 11/23583  | 0.721816 | 0.833102 | 0.785024 | Terb1      |
| GO_CC_m1GO:000078nuclear telomere 1/2589       | 11/23583  | 0.721816 | 0.833102 | 0.785024 | Terb1      |
| GO_CC_m1GO:000217manchette 1/2589              | 11/23583  | 0.721816 | 0.833102 | 0.785024 | 1110017D1  |
| GO_CC_m1GO:000558fibrillar collagen 1/2589     | 11/23583  | 0.721816 | 0.833102 | 0.785024 | Col5a1     |
| GO_CC_m1GO:000578mitochondrion 1/2589          | 11/23583  | 0.721816 | 0.833102 | 0.785024 | Uqcrc2     |
| GO_CC_m1GO:000578signal receptor 1/2589        | 11/23583  | 0.721816 | 0.833102 | 0.785024 | Rp9        |
| GO_CC_m1GO:000828oligosaccharide 1/2589        | 11/23583  | 0.721816 | 0.833102 | 0.785024 | Rpn2       |
| GO_CC_m1GO:001644RISC complex 1/2589           | 11/23583  | 0.721816 | 0.833102 | 0.785024 | Eif4e      |
| GO_CC_m1GO:003089HOPS complex 1/2589           | 11/23583  | 0.721816 | 0.833102 | 0.785024 | Vps18      |
| GO_CC_m1GO:003133RNAi effect 1/2589            | 11/23583  | 0.721816 | 0.833102 | 0.785024 | Eif4e      |
| GO_CC_m1GO:003259dendritic spine 1/2589        | 11/23583  | 0.721816 | 0.833102 | 0.785024 | Gria1      |
| GO_CC_m1GO:003279SMN complex 1/2589            | 11/23583  | 0.721816 | 0.833102 | 0.785024 | Fmr1       |
| GO_CC_m1GO:003618inner dynein 1/2589           | 11/23583  | 0.721816 | 0.833102 | 0.785024 | Dnah1      |
| GO_CC_m1GO:003618outer dynein 1/2589           | 11/23583  | 0.721816 | 0.833102 | 0.785024 | Dnaic2     |
| GO_CC_m1GO:004262photoreceptor 1/2589          | 11/23583  | 0.721816 | 0.833102 | 0.785024 | Prcd       |
| GO_CC_m1GO:007057RISC-loading 1/2589           | 11/23583  | 0.721816 | 0.833102 | 0.785024 | Mir27a     |
| GO_CC_m1GO:007088cell body filament 1/2589     | 11/23583  | 0.721816 | 0.833102 | 0.785024 | Cadm1      |
| GO_CC_m1GO:007100U2-type cap 1/2589            | 11/23583  | 0.721816 | 0.833102 | 0.785024 | Prpf19     |
| GO_CC_m1GO:007268meiotic spindle 1/2589        | 11/23583  | 0.721816 | 0.833102 | 0.785024 | Bora       |
| GO_CC_m1GO:009864banded collagen 1/2589        | 11/23583  | 0.721816 | 0.833102 | 0.785024 | Col5a1     |
| GO_CC_m1GO:199090beta-catenin 1/2589           | 11/23583  | 0.721816 | 0.833102 | 0.785024 | Pygo2      |

|                                        |           |          |          |          |             |
|----------------------------------------|-----------|----------|----------|----------|-------------|
| GO_CC_m1GO:003125leading edc14/2589    | 145/23583 | 0.73365  | 0.845802 | 0.796991 | Adora1/An   |
| GO_CC_m1GO:000585axonemal c2/2589      | 23/23583  | 0.735701 | 0.845802 | 0.796991 | Dnah1/Dna   |
| GO_CC_m1GO:003123intrinsic co2/2589    | 23/23583  | 0.735701 | 0.845802 | 0.796991 | Folr2/Hyal2 |
| GO_CC_m1GO:009887neurotrans 5/2589     | 55/23583  | 0.735957 | 0.845802 | 0.796991 | Cacng5/Ca   |
| GO_CC_m1GO:003637myofilamer3/2589      | 34/23583  | 0.736952 | 0.846043 | 0.797218 | Acta1/Tmo   |
| GO_CC_m1GO:000078nucleosom 8/2589      | 86/23583  | 0.740643 | 0.846713 | 0.79785  | Cenpa/Gly   |
| GO_CC_m1GO:003125cell project 28/2589  | 282/23583 | 0.741819 | 0.846713 | 0.79785  | Abcb1a/Ac   |
| GO_CC_m1GO:000580trans-Golg 18/2589    | 186/23583 | 0.748989 | 0.846713 | 0.79785  | Ap4e1/Atp   |
| GO_CC_m1GO:003130intrinsic co18/2589   | 186/23583 | 0.748989 | 0.846713 | 0.79785  | Acer3/Bnip  |
| GO_CC_m1GO:009868chromosom 29/2589     | 293/23583 | 0.750726 | 0.846713 | 0.79785  | Ahctf1/Blm  |
| GO_CC_m1GO:000034transcriptic 1/2589   | 12/23583  | 0.75237  | 0.846713 | 0.79785  | Sarnp       |
| GO_CC_m1GO:000583chaperonir 1/2589     | 12/23583  | 0.75237  | 0.846713 | 0.79785  | Cct3        |
| GO_CC_m1GO:000827cohesin co1/2589      | 12/23583  | 0.75237  | 0.846713 | 0.79785  | Wapl        |
| GO_CC_m1GO:001714NMDA sele 1/2589      | 12/23583  | 0.75237  | 0.846713 | 0.79785  | Grin2b      |
| GO_CC_m1GO:003012AP-2 adap 1/2589      | 12/23583  | 0.75237  | 0.846713 | 0.79785  | Ldlrap1     |
| GO_CC_m1GO:003012AP-3 adap 1/2589      | 12/23583  | 0.75237  | 0.846713 | 0.79785  | Vps18       |
| GO_CC_m1GO:003067ribonuclea: 1/2589    | 12/23583  | 0.75237  | 0.846713 | 0.79785  | Rpp40       |
| GO_CC_m1GO:003404phagophor 1/2589      | 12/23583  | 0.75237  | 0.846713 | 0.79785  | Wipi2       |
| GO_CC_m1GO:003612CatSper co 1/2589     | 12/23583  | 0.75237  | 0.846713 | 0.79785  | Catsper3    |
| GO_CC_m1GO:004261MHC class 1/2589      | 12/23583  | 0.75237  | 0.846713 | 0.79785  | H2-Q2       |
| GO_CC_m1GO:004527respiratory 1/2589    | 12/23583  | 0.75237  | 0.846713 | 0.79785  | Uqcrc2      |
| GO_CC_m1GO:007156npBAF cor 1/2589      | 12/23583  | 0.75237  | 0.846713 | 0.79785  | Smarce1     |
| GO_CC_m1GO:009752sperm plas 1/2589     | 12/23583  | 0.75237  | 0.846713 | 0.79785  | Adam4       |
| GO_CC_m1GO:000177immunolog 3/2589      | 35/23583  | 0.754925 | 0.846713 | 0.79785  | Dusp3/Ezr   |
| GO_CC_m1GO:004444cytosolic pi:29/2589  | 294/23583 | 0.757077 | 0.846713 | 0.79785  | Adcy4/Bloc  |
| GO_CC_m1GO:003086rough endc2/2589      | 24/23583  | 0.757172 | 0.846713 | 0.79785  | Bcap31/Rp   |
| GO_CC_m1GO:003258trans-Golg 2/2589     | 24/23583  | 0.757172 | 0.846713 | 0.79785  | Atp7b/Bok   |
| GO_CC_m1GO:003317proton-tra:2/2589     | 24/23583  | 0.757172 | 0.846713 | 0.79785  | Atp6v0c/Tc  |
| GO_CC_m1GO:003317proton-tra:2/2589     | 24/23583  | 0.757172 | 0.846713 | 0.79785  | Atp5o/Atp   |
| GO_CC_m1GO:003436high-densi 2/2589     | 24/23583  | 0.757172 | 0.846713 | 0.79785  | Pltp/Saa2   |
| GO_CC_m1GO:004319dendritic sl6/2589    | 67/23583  | 0.758418 | 0.847228 | 0.798335 | Fmr1/Gria1  |
| GO_CC_m1GO:000592bicellular ti 11/2589 | 119/23583 | 0.769513 | 0.85404  | 0.804754 | Adcyap1r1.  |
| GO_CC_m1GO:000574mitochond 16/2589     | 169/23583 | 0.770424 | 0.85404  | 0.804754 | Acsl1/Aifm  |
| GO_CC_m1GO:003299protein-DN 17/2589    | 179/23583 | 0.77127  | 0.85404  | 0.804754 | Terb1/Cen   |
| GO_CC_m1GO:003204small-subu3/2589      | 36/23583  | 0.771895 | 0.85404  | 0.804754 | Nop56/Pdc   |
| GO_CC_m1GO:003435plasma lipc 3/2589    | 36/23583  | 0.771895 | 0.85404  | 0.804754 | Pltp/Saa2^  |
| GO_CC_m1GO:199077lipoprotein 3/2589    | 36/23583  | 0.771895 | 0.85404  | 0.804754 | Pltp/Saa2^  |
| GO_CC_m1GO:000077chromosom 18/2589     | 189/23583 | 0.772249 | 0.85404  | 0.804754 | Ahctf1/Cer  |
| GO_CC_m1GO:003130integral co:2/2589    | 25/23583  | 0.777116 | 0.85404  | 0.804754 | Bnip3/Rhot  |
| GO_CC_m1GO:007046SAGA-type 2/2589      | 25/23583  | 0.777116 | 0.85404  | 0.804754 | Kat2a/Taf9  |
| GO_CC_m1GO:000077kinetochor 12/2589    | 130/23583 | 0.778032 | 0.85404  | 0.804754 | Ahctf1/Cer  |
| GO_CC_m1GO:000012SAGA com 1/2589       | 13/23583  | 0.779569 | 0.85404  | 0.804754 | Taf9        |
| GO_CC_m1GO:000027mitochond 1/2589      | 13/23583  | 0.779569 | 0.85404  | 0.804754 | Atp5o       |
| GO_CC_m1GO:000151voltage-ga 1/2589     | 13/23583  | 0.779569 | 0.85404  | 0.804754 | Scn4a       |
| GO_CC_m1GO:000219zona pelluc 1/2589    | 13/23583  | 0.779569 | 0.85404  | 0.804754 | Cct3        |
| GO_CC_m1GO:001651SWI/SNF c:1/2589      | 13/23583  | 0.779569 | 0.85404  | 0.804754 | Smarce1     |
| GO_CC_m1GO:001710aminoacyl- 1/2589     | 13/23583  | 0.779569 | 0.85404  | 0.804754 | Kars        |
| GO_CC_m1GO:003012clathrin co:1/2589    | 13/23583  | 0.779569 | 0.85404  | 0.804754 | Ldlrap1     |



|                   |               |         |           |          |          |          |            |
|-------------------|---------------|---------|-----------|----------|----------|----------|------------|
| GO_CC_m1GO:006501 | extracellular | 1/2589  | 13/23583  | 0.779569 | 0.85404  | 0.804754 | Alpl       |
| GO_CC_m1GO:010103 | chaperone     | 1/2589  | 13/23583  | 0.779569 | 0.85404  | 0.804754 | Cct3       |
| GO_CC_m1GO:000077 | condensed     | 4/2589  | 48/23583  | 0.78749  | 0.861842 | 0.812106 | Ahctf1/Cer |
| GO_CC_m1GO:012011 | Sm-like pr    | 7/2589  | 80/23583  | 0.788885 | 0.862493 | 0.812719 | Lsm5/Naa3  |
| GO_CC_m1GO:003133 | integral co   | 16/2589 | 172/23583 | 0.79345  | 0.865611 | 0.815657 | Acer3/Bnip |
| GO_CC_m1GO:003133 | intrinsic co  | 2/2589  | 26/23583  | 0.79561  | 0.865611 | 0.815657 | Bnip3/Rhot |
| GO_CC_m1GO:007016 | occluding j   | 11/2589 | 122/23583 | 0.796599 | 0.865611 | 0.815657 | Adcyap1r1  |
| GO_CC_m1GO:004511 | intermedia    | 15/2589 | 163/23583 | 0.800974 | 0.865611 | 0.815657 | Bcas3/Ddx1 |
| GO_CC_m1GO:003293 | protein-lip   | 3/2589  | 38/23583  | 0.80294  | 0.865611 | 0.815657 | Pltp/Saa2/ |
| GO_CC_m1GO:000097 | Prp19 com     | 1/2589  | 14/23583  | 0.803782 | 0.865611 | 0.815657 | Prpf19     |
| GO_CC_m1GO:003003 | TRAPP con     | 1/2589  | 14/23583  | 0.803782 | 0.865611 | 0.815657 | Trappc9    |
| GO_CC_m1GO:003012 | COPI vesicl   | 1/2589  | 14/23583  | 0.803782 | 0.865611 | 0.815657 | Copg2      |
| GO_CC_m1GO:003066 | clathrin-co   | 1/2589  | 14/23583  | 0.803782 | 0.865611 | 0.815657 | Ldlrap1    |
| GO_CC_m1GO:003317 | proton-tra    | 1/2589  | 14/23583  | 0.803782 | 0.865611 | 0.815657 | Atp5a1     |
| GO_CC_m1GO:003525 | ciliary rootl | 1/2589  | 14/23583  | 0.803782 | 0.865611 | 0.815657 | Klc3       |
| GO_CC_m1GO:007093 | contractile   | 1/2589  | 14/23583  | 0.803782 | 0.865611 | 0.815657 | Prc1       |
| GO_CC_m1GO:007101 | catalytic str | 1/2589  | 14/23583  | 0.803782 | 0.865611 | 0.815657 | Prpf19     |
| GO_CC_m1GO:007156 | nBAF com      | 1/2589  | 14/23583  | 0.803782 | 0.865611 | 0.815657 | Smarce1    |
| GO_CC_m1GO:199002 | mitotic spir  | 1/2589  | 14/23583  | 0.803782 | 0.865611 | 0.815657 | Olfr13     |
| GO_CC_m1GO:007100 | U2-type ca    | 2/2589  | 27/23583  | 0.812731 | 0.874375 | 0.823916 | Ppie/Prpf1 |
| GO_CC_m1GO:003131 | extrinsic co  | 3/2589  | 39/23583  | 0.817083 | 0.878181 | 0.827501 | Plekhf2/Us |
| GO_CC_m1GO:004481 | DNA pack      | 8/2589  | 94/23583  | 0.823312 | 0.883995 | 0.83298  | Cenpa/Gly  |
| GO_CC_m1GO:003108 | BLOC-1 co     | 1/2589  | 15/23583  | 0.825336 | 0.884406 | 0.833367 | Bloc1s5    |
| GO_CC_m1GO:004526 | proton-tra    | 1/2589  | 15/23583  | 0.825336 | 0.884406 | 0.833367 | Atp5o      |
| GO_CC_m1GO:001663 | PML body      | 6/2589  | 73/23583  | 0.826241 | 0.884497 | 0.833453 | Atr/Blm/Nr |
| GO_CC_m1GO:000573 | small nucle   | 2/2589  | 28/23583  | 0.828558 | 0.886097 | 0.834961 | Nop10/No   |
| GO_CC_m1GO:000591 | cell-cell jur | 46/2589 | 473/23583 | 0.829877 | 0.886257 | 0.835112 | Abcb1a/Ac  |
| GO_CC_m1GO:009973 | cell cortex   | 3/2589  | 40/23583  | 0.830352 | 0.886257 | 0.835112 | Epb41/Gna  |
| GO_CC_m1GO:190356 | extracellular | 8/2589  | 95/23583  | 0.832036 | 0.887176 | 0.835977 | Acy1/Anxa  |
| GO_CC_m1GO:009856 | intrinsic co  | 2/2589  | 29/23583  | 0.843168 | 0.895178 | 0.843518 | Rab27b/Ra  |
| GO_CC_m1GO:004323 | extracellular | 9/2589  | 107/23583 | 0.843557 | 0.895178 | 0.843518 | Acy1/Alpl/ |
| GO_CC_m1GO:000585 | eukaryotic    | 1/2589  | 16/23583  | 0.844523 | 0.895178 | 0.843518 | Eif3f      |
| GO_CC_m1GO:000585 | muscle my     | 1/2589  | 16/23583  | 0.844523 | 0.895178 | 0.843518 | Myh7       |
| GO_CC_m1GO:001036 | chromocer     | 1/2589  | 16/23583  | 0.844523 | 0.895178 | 0.843518 | Fmr1       |
| GO_CC_m1GO:003066 | COPI-coat     | 1/2589  | 16/23583  | 0.844523 | 0.895178 | 0.843518 | Copg2      |
| GO_CC_m1GO:004439 | ribosomal     | 21/2589 | 231/23583 | 0.848643 | 0.898661 | 0.8468   | Fau/Mrpl10 |
| GO_CC_m1GO:004278 | polysomal     | 2/2589  | 30/23583  | 0.856639 | 0.906238 | 0.85394  | Pnpt1/Rps2 |
| GO_CC_m1GO:000153 | cornified ei  | 4/2589  | 54/23583  | 0.857978 | 0.906764 | 0.854436 | Cst6/Lce3c |
| GO_CC_m1GO:001993 | nuclear cyc   | 1/2589  | 17/23583  | 0.861603 | 0.907926 | 0.85553  | Cdk7       |
| GO_CC_m1GO:003364 | host intrac   | 1/2589  | 17/23583  | 0.861603 | 0.907926 | 0.85553  | Fmr1       |
| GO_CC_m1GO:004365 | intracellular | 1/2589  | 17/23583  | 0.861603 | 0.907926 | 0.85553  | Fmr1       |
| GO_CC_m1GO:003167 | A band        | 3/2589  | 43/23583  | 0.865297 | 0.910928 | 0.858359 | Kat2b/Rpl7 |
| GO_CC_m1GO:003066 | clathrin-co   | 2/2589  | 31/23583  | 0.869043 | 0.913088 | 0.860395 | Ldlrap1/Ra |
| GO_CC_m1GO:005123 | spindle mic   | 2/2589  | 31/23583  | 0.869043 | 0.913088 | 0.860395 | Olfr13/Rac |
| GO_CC_m1GO:007006 | extracellular | 7/2589  | 89/23583  | 0.870005 | 0.913208 | 0.860508 | Acy1/Anxa  |
| GO_CC_m1GO:009883 | plasma me     | 15/2589 | 175/23583 | 0.876176 | 0.91589  | 0.863035 | Cacng5/Ca  |
| GO_CC_m1GO:002262 | cytosolic sr  | 4/2589  | 56/23583  | 0.876558 | 0.91589  | 0.863035 | Fau/Mrps9  |
| GO_CC_m1GO:000183 | phagocytic    | 1/2589  | 18/23583  | 0.876808 | 0.91589  | 0.863035 | Abl2       |

|                   |                      |           |          |          |          |              |
|-------------------|----------------------|-----------|----------|----------|----------|--------------|
| GO_CC_m1GO:003436 | very-low-c1/2589     | 18/23583  | 0.876808 | 0.91589  | 0.863035 | Vldlr        |
| GO_CC_m1GO:003436 | triglyceride1/2589   | 18/23583  | 0.876808 | 0.91589  | 0.863035 | Vldlr        |
| GO_CC_m1GO:000014 | exocyst 1/2589       | 19/23583  | 0.890343 | 0.925544 | 0.872132 | Exoc3l2      |
| GO_CC_m1GO:001899 | host 1/2589          | 19/23583  | 0.890343 | 0.925544 | 0.872132 | Fmr1         |
| GO_CC_m1GO:003242 | stereociliur1/2589   | 19/23583  | 0.890343 | 0.925544 | 0.872132 | Myo3a        |
| GO_CC_m1GO:003364 | host cell pε1/2589   | 19/23583  | 0.890343 | 0.925544 | 0.872132 | Fmr1         |
| GO_CC_m1GO:004365 | host cell 1/2589     | 19/23583  | 0.890343 | 0.925544 | 0.872132 | Fmr1         |
| GO_CC_m1GO:003108 | BLOC com1/2589       | 20/23583  | 0.902391 | 0.934464 | 0.880537 | Bloc1s5      |
| GO_CC_m1GO:003526 | NuA4 histc1/2589     | 20/23583  | 0.902391 | 0.934464 | 0.880537 | Gm3086       |
| GO_CC_m1GO:004303 | costamere 1/2589     | 20/23583  | 0.902391 | 0.934464 | 0.880537 | Ahnak2       |
| GO_CC_m1GO:004318 | H4/H2A hi:1/2589     | 20/23583  | 0.902391 | 0.934464 | 0.880537 | Gm3086       |
| GO_CC_m1GO:001593 | large ribos12/2589   | 149/23583 | 0.903872 | 0.9351   | 0.881136 | Mrpl10/Mr    |
| GO_CC_m1GO:003586 | site of doubl2/2589  | 35/23583  | 0.909388 | 0.939196 | 0.884996 | Aplf/Prpf19  |
| GO_CC_m1GO:003011 | AP-type m3/2589      | 48/23583  | 0.909574 | 0.939196 | 0.884996 | Ap4e1/Ldlr   |
| GO_CC_m1GO:001632 | apicolatera1/2589    | 21/23583  | 0.913116 | 0.941951 | 0.887592 | Mpdz         |
| GO_CC_m1GO:000590 | clathrin-co4/2589    | 61/23583  | 0.914044 | 0.942007 | 0.887645 | Ap1s2/Ldlr   |
| GO_CC_m1GO:004257 | immunoglc11/2589     | 141/23583 | 0.916362 | 0.942902 | 0.888488 | Ighv1-15/Ig  |
| GO_CC_m1GO:003011 | clathrin co:3/2589   | 49/23583  | 0.916661 | 0.942902 | 0.888488 | Igf2r/Ldlrap |
| GO_CC_m1GO:000079 | condensed15/2589     | 185/23583 | 0.919899 | 0.94533  | 0.890776 | Blm/Cenpa    |
| GO_CC_m1GO:000175 | photorecep5/2589     | 76/23583  | 0.930326 | 0.95049  | 0.895638 | Prcd/Guca1   |
| GO_CC_m1GO:003012 | clathrin ves1/2589   | 23/23583  | 0.931161 | 0.95049  | 0.895638 | Ldlrap1      |
| GO_CC_m1GO:003013 | COPI-coat1/2589      | 23/23583  | 0.931161 | 0.95049  | 0.895638 | Copg2        |
| GO_CC_m1GO:003470 | sodium ch:1/2589     | 23/23583  | 0.931161 | 0.95049  | 0.895638 | Scn4a        |
| GO_CC_m1GO:003017 | integral coi2/2589   | 38/23583  | 0.931655 | 0.95049  | 0.895638 | Acer3/Yif1a  |
| GO_CC_m1GO:009073 | site of DNA2/2589    | 38/23583  | 0.931655 | 0.95049  | 0.895638 | Aplf/Prpf19  |
| GO_CC_m1GO:007256 | blood micr12/2589    | 156/23583 | 0.931966 | 0.95049  | 0.895638 | Hspa1a/Igf   |
| GO_CC_m1GO:001981 | immunoglc11/2589     | 145/23583 | 0.931974 | 0.95049  | 0.895638 | Ighv1-15/Ig  |
| GO_CC_m1GO:000568 | U2-type sp4/2589     | 65/23583  | 0.936335 | 0.953766 | 0.898725 | Naa38/Ppic   |
| GO_CC_m1GO:000078 | nuclear nuc2/2589    | 39/23583  | 0.937848 | 0.953766 | 0.898725 | Cenpa/Mpl    |
| GO_CC_m1GO:003143 | M band 1/2589        | 24/23583  | 0.938725 | 0.953766 | 0.898725 | S100a1       |
| GO_CC_m1GO:003645 | ESCRT corr1/2589     | 24/23583  | 0.938725 | 0.953766 | 0.898725 | Chmp1b       |
| GO_CC_m1GO:003122 | intrinsic co2/2589   | 40/23583  | 0.943505 | 0.956618 | 0.901412 | Acer3/Yif1a  |
| GO_CC_m1GO:004421 | other organ1/2589    | 25/23583  | 0.945459 | 0.956618 | 0.901412 | Fmr1         |
| GO_CC_m1GO:004421 | other organ1/2589    | 25/23583  | 0.945459 | 0.956618 | 0.901412 | Fmr1         |
| GO_CC_m1GO:004421 | other organ1/2589    | 25/23583  | 0.945459 | 0.956618 | 0.901412 | Fmr1         |
| GO_CC_m1GO:000079 | synaptoner9/2589     | 127/23583 | 0.946856 | 0.956618 | 0.901412 | Blm/Fkbp6    |
| GO_CC_m1GO:009908 | synaptoner9/2589     | 127/23583 | 0.946856 | 0.956618 | 0.901412 | Blm/Fkbp6    |
| GO_CC_m1GO:000079 | condensed19/2589     | 238/23583 | 0.94933  | 0.958219 | 0.902921 | Ahctf1/Blm   |
| GO_CC_m1GO:000568 | U12-type s1/2589     | 26/23583  | 0.951453 | 0.959464 | 0.904094 | Zrsr2        |
| GO_CC_m1GO:000586 | cytoplasmic1/2589    | 27/23583  | 0.956789 | 0.963725 | 0.908109 | Tpr          |
| GO_CC_m1GO:003028 | dynein con3/2589     | 57/23583  | 0.957467 | 0.963725 | 0.908109 | Dnah1/Dnac   |
| GO_CC_m1GO:002262 | cytosolic ril11/2589 | 157/23583 | 0.964697 | 0.970097 | 0.914113 | Fau/Mrps9    |
| GO_CC_m1GO:003013 | clathrin ad:1/2589   | 29/23583  | 0.965765 | 0.970266 | 0.914272 | Ldlrap1      |
| GO_CC_m1GO:003258 | ruffle mem3/2589     | 66/23583  | 0.980731 | 0.984384 | 0.927576 | Cdkl5/Ptprj  |
| GO_CC_m1GO:007101 | precatalytic1/2589   | 35/23583  | 0.982978 | 0.985721 | 0.928836 | Prpf38a      |
| GO_CC_m1GO:005503 | recycling e1/2589    | 36/23583  | 0.984849 | 0.98668  | 0.929739 | Bok          |
| GO_CC_m1GO:002262 | cytosolic la4/2589   | 94/23583  | 0.994158 | 0.995081 | 0.937655 | Rpl23/Rpl3   |
| GO_CC_m1GO:000080 | lateral elen4/2589   | 104/23583 | 0.997595 | 0.997595 | 0.940025 | Blm/Sycp1    |

|                                     |           |          |          |          |             |
|-------------------------------------|-----------|----------|----------|----------|-------------|
| GO_CC_mzGO:00487εpresynaptic3/470   | 10/23583  | 0.00085  | 0.459187 | 0.446655 | Grm7/Stxb   |
| GO_CC_mzGO:00715εnBAF comp3/470     | 14/23583  | 0.002431 | 0.506977 | 0.493141 | Actl6b/Smα  |
| GO_CC_mzGO:00304εmidbody 8/470      | 132/23583 | 0.005033 | 0.506977 | 0.493141 | Alkbh4/Au   |
| GO_CC_mzGO:00018εphagocytic3/470    | 18/23583  | 0.005136 | 0.506977 | 0.493141 | Rack1/Myc   |
| GO_CC_mzGO:00057εGolgi lume2/470    | 6/23583   | 0.005638 | 0.506977 | 0.493141 | Agrp/Galnt  |
| GO_CC_mzGO:00321εcleavage fl4/470   | 40/23583  | 0.008076 | 0.506977 | 0.493141 | Cit/Ect2/Ra |
| GO_CC_mzGO:00321εcell divisor5/470  | 69/23583  | 0.012176 | 0.506977 | 0.493141 | Cit/Ect2/Ra |
| GO_CC_mzGO:000574mitochond2/470     | 10/23583  | 0.016043 | 0.506977 | 0.493141 | Pink1/Tom   |
| GO_CC_mzGO:00166εnuclear spe12/470  | 302/23583 | 0.018683 | 0.506977 | 0.493141 | Cdc5l/Dyrk  |
| GO_CC_mzGO:00056εU4 snRNP 2/470     | 11/23583  | 0.019353 | 0.506977 | 0.493141 | Prpf31/Snr  |
| GO_CC_mzGO:00321εcell divisor4/470  | 52/23583  | 0.019867 | 0.506977 | 0.493141 | Cit/Ect2/Ra |
| GO_CC_mzGO:00055εcollagen ty1/470   | 1/23583   | 0.01993  | 0.506977 | 0.493141 | Col2a1      |
| GO_CC_mzGO:00057εnucleolus c1/470   | 1/23583   | 0.01993  | 0.506977 | 0.493141 | Sirt7       |
| GO_CC_mzGO:003087nucleolar c1/470   | 1/23583   | 0.01993  | 0.506977 | 0.493141 | Sirt7       |
| GO_CC_mzGO:00420εinterleukin·1/470  | 1/23583   | 0.01993  | 0.506977 | 0.493141 | Il12rb1     |
| GO_CC_mzGO:00704εShc-EGFR r1/470    | 1/23583   | 0.01993  | 0.506977 | 0.493141 | Shc1        |
| GO_CC_mzGO:000567holo TFIIH 2/470   | 12/23583  | 0.022921 | 0.506977 | 0.493141 | Gtf2h1/Psn  |
| GO_CC_mzGO:00453εphagocytic5/470    | 83/23583  | 0.025151 | 0.506977 | 0.493141 | Cybb/Rab1   |
| GO_CC_mzGO:001651SWI/SNF α2/470     | 13/23583  | 0.026735 | 0.506977 | 0.493141 | Actl6b/Smα  |
| GO_CC_mzGO:00442εER-mitochr2/470    | 13/23583  | 0.026735 | 0.506977 | 0.493141 | Acsl4/Tomi  |
| GO_CC_mzGO:00987εouter mitochr2/470 | 14/23583  | 0.030786 | 0.506977 | 0.493141 | Pink1/Tom   |
| GO_CC_mzGO:00150εCajal body 3/470   | 36/23583  | 0.034553 | 0.506977 | 0.493141 | Ell/Hnrnpa: |
| GO_CC_mzGO:00056εU4atac snR1/470    | 2/23583   | 0.039463 | 0.506977 | 0.493141 | Prpf31      |
| GO_CC_mzGO:000584nuclear cap1/470   | 2/23583   | 0.039463 | 0.506977 | 0.493141 | Ncbp2       |
| GO_CC_mzGO:00165εRSC-type c1/470    | 2/23583   | 0.039463 | 0.506977 | 0.493141 | Suz12       |
| GO_CC_mzGO:001717glucosidasε1/470   | 2/23583   | 0.039463 | 0.506977 | 0.493141 | Prkcsch     |
| GO_CC_mzGO:00365εDerlin-1-V1/470    | 2/23583   | 0.039463 | 0.506977 | 0.493141 | Derl1       |
| GO_CC_mzGO:00425εRNA nucleε1/470    | 2/23583   | 0.039463 | 0.506977 | 0.493141 | Ran         |
| GO_CC_mzGO:00710εU2-type pr1/470    | 2/23583   | 0.039463 | 0.506977 | 0.493141 | Prpf31      |
| GO_CC_mzGO:00725εinterleukin·1/470  | 2/23583   | 0.039463 | 0.506977 | 0.493141 | Il12rb1     |
| GO_CC_mzGO:009734Rix1 compl1/470    | 2/23583   | 0.039463 | 0.506977 | 0.493141 | Wdr18       |
| GO_CC_mzGO:19015εdendritic nr1/470  | 2/23583   | 0.039463 | 0.506977 | 0.493141 | Clip2       |
| GO_CC_mzGO:19905εATF4-CREε1/470     | 2/23583   | 0.039463 | 0.506977 | 0.493141 | Atf4        |
| GO_CC_mzGO:19905εATF1-ATF41/470     | 2/23583   | 0.039463 | 0.506977 | 0.493141 | Atf4        |
| GO_CC_mzGO:199061CHOP-ATF1/470      | 2/23583   | 0.039463 | 0.506977 | 0.493141 | Atf4        |
| GO_CC_mzGO:19906εIRE1-RACK1/470     | 2/23583   | 0.039463 | 0.506977 | 0.493141 | Rack1       |
| GO_CC_mzGO:00347εmethyltran 5/470   | 94/23583  | 0.039938 | 0.506977 | 0.493141 | Mettl14/Pr  |
| GO_CC_mzGO:004367axon termi8/470    | 194/23583 | 0.041206 | 0.506977 | 0.493141 | Cad/Cplx4/  |
| GO_CC_mzGO:001601dystrophin 2/470   | 17/23583  | 0.044247 | 0.506977 | 0.493141 | Magee1/Sç   |
| GO_CC_mzGO:00906εglycoprote 2/470   | 17/23583  | 0.044247 | 0.506977 | 0.493141 | Magee1/Sç   |
| GO_CC_mzGO:00487εpresynaptic3/470   | 40/23583  | 0.045131 | 0.506977 | 0.493141 | Grm7/Stxb   |
| GO_CC_mzGO:000577peroxisomε3/470    | 42/23583  | 0.050953 | 0.506977 | 0.493141 | Mavs/Pex5   |
| GO_CC_mzGO:00319εmicrobody 3/470    | 42/23583  | 0.050953 | 0.506977 | 0.493141 | Mavs/Pex5   |
| GO_CC_mzGO:00442εorganelle r2/470   | 19/23583  | 0.054209 | 0.506977 | 0.493141 | Acsl4/Tomi  |
| GO_CC_mzGO:00706εSWI/SNF s14/470    | 72/23583  | 0.055612 | 0.506977 | 0.493141 | Actl6b/Smα  |
| GO_CC_mzGO:000022vacuolar pr1/470   | 3/23583   | 0.058608 | 0.506977 | 0.493141 | Atp6v1h     |
| GO_CC_mzGO:00056εnuclear pre1/470   | 3/23583   | 0.058608 | 0.506977 | 0.493141 | Wdr18       |
| GO_CC_mzGO:00093εglycerol-3-1/470   | 3/23583   | 0.058608 | 0.506977 | 0.493141 | Gpd1l       |

|                                      |           |          |          |          |              |
|--------------------------------------|-----------|----------|----------|----------|--------------|
| GO_CC_mzGO:003107nucleocyto 1/470    | 3/23583   | 0.058608 | 0.506977 | 0.493141 | Ran          |
| GO_CC_mzGO:003228symmetric 1/470     | 3/23583   | 0.058608 | 0.506977 | 0.493141 | Penk         |
| GO_CC_mzGO:003318CAF-1 cor 1/470     | 3/23583   | 0.058608 | 0.506977 | 0.493141 | Chaf1a       |
| GO_CC_mzGO:003638pre-replica 1/470   | 3/23583   | 0.058608 | 0.506977 | 0.493141 | Wdr18        |
| GO_CC_mzGO:003648CHOP-C/E 1/470      | 3/23583   | 0.058608 | 0.506977 | 0.493141 | Cebpa        |
| GO_CC_mzGO:009714centralspin 1/470   | 3/23583   | 0.058608 | 0.506977 | 0.493141 | Ect2         |
| GO_CC_mzGO:190293inward rect 1/470   | 3/23583   | 0.058608 | 0.506977 | 0.493141 | Kcnh2        |
| GO_CC_mzGO:199003Lewy body 1/470     | 3/23583   | 0.058608 | 0.506977 | 0.493141 | Atf4         |
| GO_CC_mzGO:009738glial cell pr 2/470 | 20/23583  | 0.059458 | 0.506977 | 0.493141 | Glul/Pink1   |
| GO_CC_mzGO:004430neuron prc 8/470    | 211/23583 | 0.061507 | 0.506977 | 0.493141 | Cad/Cplx4/   |
| GO_CC_mzGO:015003distal axon 12/470  | 364/23583 | 0.062243 | 0.506977 | 0.493141 | Agrn/Auts2   |
| GO_CC_mzGO:000577vacuolar m 7/470    | 177/23583 | 0.064749 | 0.506977 | 0.493141 | Atp6v1h/C    |
| GO_CC_mzGO:000167male germ 2/470     | 21/23583  | 0.064874 | 0.506977 | 0.493141 | H2afx/Ran    |
| GO_CC_mzGO:001623inclusion b 4/470   | 76/23583  | 0.065279 | 0.506977 | 0.493141 | Atf4/Pabpr   |
| GO_CC_mzGO:003293protein-D 7/470     | 179/23583 | 0.067886 | 0.506977 | 0.493141 | Cdc5l/H2af   |
| GO_CC_mzGO:000577late endos 7/470    | 180/23583 | 0.069488 | 0.506977 | 0.493141 | Bace1/Chr    |
| GO_CC_mzGO:004273presynaptic 4/470   | 78/23583  | 0.070419 | 0.506977 | 0.493141 | Grm7/Snpl    |
| GO_CC_mzGO:000568U5 snRNP 2/470      | 23/23583  | 0.07617  | 0.506977 | 0.493141 | Dcaf4/Snrp   |
| GO_CC_mzGO:000932phenylalan 1/470    | 4/23583   | 0.077372 | 0.506977 | 0.493141 | Farsa        |
| GO_CC_mzGO:001707intracellula 1/470  | 4/23583   | 0.077372 | 0.506977 | 0.493141 | Pex5l        |
| GO_CC_mzGO:003518Rb-E2F cor 1/470    | 4/23583   | 0.077372 | 0.506977 | 0.493141 | Cebpa        |
| GO_CC_mzGO:003538histone loc 1/470   | 4/23583   | 0.077372 | 0.506977 | 0.493141 | Ell          |
| GO_CC_mzGO:003638RNA N6-m 1/470      | 4/23583   | 0.077372 | 0.506977 | 0.493141 | Mettl14      |
| GO_CC_mzGO:007044elongin coi 1/470   | 4/23583   | 0.077372 | 0.506977 | 0.493141 | Eloa         |
| GO_CC_mzGO:007195elastic fiber 1/470 | 4/23583   | 0.077372 | 0.506977 | 0.493141 | Mfap4        |
| GO_CC_mzGO:009745GAIT comp 1/470     | 4/23583   | 0.077372 | 0.506977 | 0.493141 | Eprs         |
| GO_CC_mzGO:009883postsynapt 1/470    | 4/23583   | 0.077372 | 0.506977 | 0.493141 | Rab11a       |
| GO_CC_mzGO:004445microtubul 6/470    | 149/23583 | 0.078218 | 0.506977 | 0.493141 | 2700049AC    |
| GO_CC_mzGO:001986outer mem 7/470     | 187/23583 | 0.081332 | 0.506977 | 0.493141 | Acsl4/Mavs   |
| GO_CC_mzGO:003196organelle c 7/470   | 187/23583 | 0.081332 | 0.506977 | 0.493141 | Acsl4/Mavs   |
| GO_CC_mzGO:004443vacuolar p 7/470    | 187/23583 | 0.081332 | 0.506977 | 0.493141 | Atp6v1h/C    |
| GO_CC_mzGO:003645ESCRT cor 2/470     | 24/23583  | 0.082034 | 0.506977 | 0.493141 | Chmp3/Tsg    |
| GO_CC_mzGO:009744apical denc 2/470   | 24/23583  | 0.082034 | 0.506977 | 0.493141 | Ptk2b/Slc7;  |
| GO_CC_mzGO:000807voltage-ga 4/470    | 84/23583  | 0.087035 | 0.506977 | 0.493141 | Kcne4/Kcni   |
| GO_CC_mzGO:000578lysosomal r 5/470   | 118/23583 | 0.087384 | 0.506977 | 0.493141 | Atp6v1h/C    |
| GO_CC_mzGO:009885lytic vacuol 5/470  | 118/23583 | 0.087384 | 0.506977 | 0.493141 | Atp6v1h/C    |
| GO_CC_mzGO:003130integral coi 2/470  | 25/23583  | 0.088031 | 0.506977 | 0.493141 | Pink1/Tom    |
| GO_CC_mzGO:003280carboxy-te 2/470    | 25/23583  | 0.088031 | 0.506977 | 0.493141 | Gtf2h1/Psn   |
| GO_CC_mzGO:004318terminal bc 5/470   | 120/23583 | 0.092271 | 0.506977 | 0.493141 | Cad/Cplx4/   |
| GO_CC_mzGO:000802transcriptic 3/470  | 54/23583  | 0.092773 | 0.506977 | 0.493141 | Aff3/Ell/Elo |
| GO_CC_mzGO:190494ATPase cor 4/470    | 86/23583  | 0.09296  | 0.506977 | 0.493141 | Actl6b/Smc   |
| GO_CC_mzGO:000078condensed 2/470     | 26/23583  | 0.094155 | 0.506977 | 0.493141 | Aurkb/Ss18   |
| GO_CC_mzGO:003130intrinsic coi 2/470 | 26/23583  | 0.094155 | 0.506977 | 0.493141 | Pink1/Tom    |
| GO_CC_mzGO:004654U4/U6 x U5 2/470    | 26/23583  | 0.094155 | 0.506977 | 0.493141 | Prpf31/Snr   |
| GO_CC_mzGO:001562actin cytosl 14/470 | 474/23583 | 0.094262 | 0.506977 | 0.493141 | Acaca/Auts   |
| GO_CC_mzGO:000568U7 snRNP 1/470      | 5/23583   | 0.095762 | 0.506977 | 0.493141 | Snrpb        |
| GO_CC_mzGO:000592muscle ten 1/470    | 5/23583   | 0.095762 | 0.506977 | 0.493141 | Nrap         |
| GO_CC_mzGO:003048smooth m 1/470      | 5/23583   | 0.095762 | 0.506977 | 0.493141 | Myh11        |

|                                          |           |          |          |          |             |
|------------------------------------------|-----------|----------|----------|----------|-------------|
| GO_CC_mzGO:003213chromosome1/470         | 5/23583   | 0.095762 | 0.506977 | 0.493141 | Aurkb       |
| GO_CC_mzGO:003350HULC complex1/470       | 5/23583   | 0.095762 | 0.506977 | 0.493141 | Rnf20       |
| GO_CC_mzGO:003355rDNA heterodimer1/470   | 5/23583   | 0.095762 | 0.506977 | 0.493141 | Rrp8        |
| GO_CC_mzGO:003597transcription1/470      | 5/23583   | 0.095762 | 0.506977 | 0.493141 | Jund        |
| GO_CC_mzGO:004529mRNA editing1/470       | 5/23583   | 0.095762 | 0.506977 | 0.493141 | Mettl14     |
| GO_CC_mzGO:014000KICSTOR complex1/470    | 5/23583   | 0.095762 | 0.506977 | 0.493141 | Itfg2       |
| GO_CC_mzGO:009057RNA polymerase6/470     | 158/23583 | 0.096905 | 0.508043 | 0.494179 | Atf4/Cebpα  |
| GO_CC_mzGO:007100U2-type Cα2/470         | 27/23583  | 0.100397 | 0.518338 | 0.504192 | Cdc5l/Snrp  |
| GO_CC_mzGO:002262cytosolic sr3/470       | 56/23583  | 0.100788 | 0.518338 | 0.504192 | Rack1/Mrp   |
| GO_CC_mzGO:004443microbody3/470          | 57/23583  | 0.104896 | 0.525172 | 0.51084  | Mavs/Pex5   |
| GO_CC_mzGO:004443peroxisome3/470         | 57/23583  | 0.104896 | 0.525172 | 0.51084  | Mavs/Pex5   |
| GO_CC_mzGO:004307germ cell n2/470        | 28/23583  | 0.10675  | 0.525172 | 0.51084  | H2afx/Ran   |
| GO_CC_mzGO:005503recycling e5/470        | 126/23583 | 0.107747 | 0.525172 | 0.51084  | Bloc1s2/Ra  |
| GO_CC_mzGO:000173sex chromosome1/470     | 6/23583   | 0.113787 | 0.525172 | 0.51084  | Suz12       |
| GO_CC_mzGO:000578signal pept1/470        | 6/23583   | 0.113787 | 0.525172 | 0.51084  | Sec11c      |
| GO_CC_mzGO:000582kinetochore1/470        | 6/23583   | 0.113787 | 0.525172 | 0.51084  | Rab11a      |
| GO_CC_mzGO:001601sarcoglycan1/470        | 6/23583   | 0.113787 | 0.525172 | 0.51084  | Sgcd        |
| GO_CC_mzGO:003278ELL-EAF complex1/470    | 6/23583   | 0.113787 | 0.525172 | 0.51084  | Aff3        |
| GO_CC_mzGO:003438Pwp2p-complex1/470      | 6/23583   | 0.113787 | 0.525172 | 0.51084  | Pwp2        |
| GO_CC_mzGO:007120histone pre1/470        | 6/23583   | 0.113787 | 0.525172 | 0.51084  | Snrpb       |
| GO_CC_mzGO:009741Lewy body1/470          | 6/23583   | 0.113787 | 0.525172 | 0.51084  | Atf4        |
| GO_CC_mzGO:003470potassium 4/470         | 93/23583  | 0.115133 | 0.526878 | 0.5125   | Kcne4/Kcnc1 |
| GO_CC_mzGO:190356extracellular4/470      | 95/23583  | 0.121858 | 0.551296 | 0.536251 | Arrdc1/Hnr  |
| GO_CC_mzGO:000574mitochondrion6/470      | 169/23583 | 0.122665 | 0.551296 | 0.536251 | Acsl4/Mavs  |
| GO_CC_mzGO:000581centrosome14/470        | 498/23583 | 0.125563 | 0.551296 | 0.536251 | 2700049AC   |
| GO_CC_mzGO:003470cation channel7/470     | 209/23583 | 0.12558  | 0.551296 | 0.536251 | Kcne4/Kcnc1 |
| GO_CC_mzGO:009752spliceosome2/470        | 31/23583  | 0.126409 | 0.551296 | 0.536251 | Prpf31/Snr  |
| GO_CC_mzGO:000043core TFIIH 1/470        | 7/23583   | 0.131454 | 0.551296 | 0.536251 | Gtf2h1      |
| GO_CC_mzGO:000565nucleolar ribosome1/470 | 7/23583   | 0.131454 | 0.551296 | 0.536251 | Rpp38       |
| GO_CC_mzGO:001601dystroglycan1/470       | 7/23583   | 0.131454 | 0.551296 | 0.536251 | Sgcd        |
| GO_CC_mzGO:003318proton-transporter1/470 | 7/23583   | 0.131454 | 0.551296 | 0.536251 | Atp6v1h     |
| GO_CC_mzGO:009752spliceosome3/470        | 64/23583  | 0.135377 | 0.551296 | 0.536251 | Dcaf4/Prpf  |
| GO_CC_mzGO:000579rough endoplasmic4/470  | 100/23583 | 0.139378 | 0.551296 | 0.536251 | Cybb/Der1J  |
| GO_CC_mzGO:000592gap junction2/470       | 33/23583  | 0.139951 | 0.551296 | 0.536251 | Gja4/Panx2  |
| GO_CC_mzGO:000568U2-type splice3/470     | 65/23583  | 0.139957 | 0.551296 | 0.536251 | Cdc5l/Prpf  |
| GO_CC_mzGO:001645myosin complex3/470     | 65/23583  | 0.139957 | 0.551296 | 0.536251 | Myh11/My    |
| GO_CC_mzGO:003099intraciliary 2/470      | 34/23583  | 0.146835 | 0.551296 | 0.536251 | Ift122/Ttc3 |
| GO_CC_mzGO:000567chromatin 1/470         | 8/23583   | 0.148769 | 0.551296 | 0.536251 | Rrp8        |
| GO_CC_mzGO:000595cAMP-dependent1/470     | 8/23583   | 0.148769 | 0.551296 | 0.536251 | Prkar1a     |
| GO_CC_mzGO:003099intraciliary 1/470      | 8/23583   | 0.148769 | 0.551296 | 0.536251 | Ift122      |
| GO_CC_mzGO:003131extrinsic co1/470       | 8/23583   | 0.148769 | 0.551296 | 0.536251 | Coq8b       |
| GO_CC_mzGO:003159nuclear pre1/470        | 8/23583   | 0.148769 | 0.551296 | 0.536251 | Psmc5       |
| GO_CC_mzGO:003200early phagosome1/470    | 8/23583   | 0.148769 | 0.551296 | 0.536251 | Syt11       |
| GO_CC_mzGO:007159neuronal ribosome1/470  | 8/23583   | 0.148769 | 0.551296 | 0.536251 | Hnrnpa2b1   |
| GO_CC_mzGO:007266tRNA-splicing1/470      | 8/23583   | 0.148769 | 0.551296 | 0.536251 | Rtcb        |
| GO_CC_mzGO:009884postsynaptic1/470       | 8/23583   | 0.148769 | 0.551296 | 0.536251 | Rab11a      |
| GO_CC_mzGO:009907BORC complex1/470       | 8/23583   | 0.148769 | 0.551296 | 0.536251 | Bloc1s2     |
| GO_CC_mzGO:007101catalytic site4/470     | 103/23583 | 0.150345 | 0.551296 | 0.536251 | Cdc5l/Dcaf  |

|                                      |           |          |          |          |             |
|--------------------------------------|-----------|----------|----------|----------|-------------|
| GO_CC_mzGO:000177immunolog2/470      | 35/23583  | 0.153786 | 0.551296 | 0.536251 | Cd53/Prkar  |
| GO_CC_mzGO:000577multivesicu2/470    | 35/23583  | 0.153786 | 0.551296 | 0.536251 | Bace1/Rab   |
| GO_CC_mzGO:007101precatalytic2/470   | 35/23583  | 0.153786 | 0.551296 | 0.536251 | Dcaf4/Prpf  |
| GO_CC_mzGO:00800Cul4-RING 2/470      | 35/23583  | 0.153786 | 0.551296 | 0.536251 | Dcaf4/Cop   |
| GO_CC_mzGO:000577peroxisome5/470     | 142/23583 | 0.154587 | 0.551296 | 0.536251 | Acsl4/Hmg   |
| GO_CC_mzGO:004257microbody 5/470     | 142/23583 | 0.154587 | 0.551296 | 0.536251 | Acsl4/Hmg   |
| GO_CC_mzGO:000581centriole 4/470     | 105/23583 | 0.157835 | 0.551296 | 0.536251 | 2700049AC   |
| GO_CC_mzGO:000079nuclear chr 11/470  | 390/23583 | 0.158337 | 0.551296 | 0.536251 | Actl6b/Asf1 |
| GO_CC_mzGO:009879presynapse 11/470   | 391/23583 | 0.160211 | 0.551296 | 0.536251 | Cad/Cplx4/  |
| GO_CC_mzGO:003204small-subu2/470     | 36/23583  | 0.1608   | 0.551296 | 0.536251 | Pwp2/Utp1   |
| GO_CC_mzGO:000588cytoplasmic3/470    | 70/23583  | 0.163601 | 0.551296 | 0.536251 | Clip2/Serp1 |
| GO_CC_mzGO:003053small nucle3/470    | 70/23583  | 0.163601 | 0.551296 | 0.536251 | Dcaf4/Prpf  |
| GO_CC_mzGO:004323extracellular4/470  | 107/23583 | 0.165459 | 0.551296 | 0.536251 | Arrdc1/Hnr  |
| GO_CC_mzGO:003326axon part 12/470    | 437/23583 | 0.165669 | 0.551296 | 0.536251 | Agrn/Autsc2 |
| GO_CC_mzGO:000081ESCRT III c1/470    | 9/23583   | 0.165739 | 0.551296 | 0.536251 | Chmp3       |
| GO_CC_mzGO:003137ubiquitin c1/470    | 9/23583   | 0.165739 | 0.551296 | 0.536251 | Rnf20       |
| GO_CC_mzGO:190291protein kin.4/470   | 109/23583 | 0.173213 | 0.551296 | 0.536251 | Cks1b/Gtf2  |
| GO_CC_mzGO:003577ribonucleo 6/470    | 188/23583 | 0.17406  | 0.551296 | 0.536251 | Ddx3y/Fast  |
| GO_CC_mzGO:00008Csex chromc2/470     | 38/23583  | 0.174993 | 0.551296 | 0.536251 | H2afx/Suz1  |
| GO_CC_mzGO:000563nuclear env 11/470  | 399/23583 | 0.175598 | 0.551296 | 0.536251 | Cybb/Gchf   |
| GO_CC_mzGO:001659DNA-direc4/470      | 110/23583 | 0.177136 | 0.551296 | 0.536251 | Chd6/Gtf2l  |
| GO_CC_mzGO:00007Enuclear nuc2/470    | 39/23583  | 0.182163 | 0.551296 | 0.536251 | H3f3b/Hist  |
| GO_CC_mzGO:000081ESCRT I cor1/470    | 10/23583  | 0.182372 | 0.551296 | 0.536251 | Tsg101      |
| GO_CC_mzGO:000588neurofilam 1/470    | 10/23583  | 0.182372 | 0.551296 | 0.536251 | Dyrk1a      |
| GO_CC_mzGO:003068multimeric 1/470    | 10/23583  | 0.182372 | 0.551296 | 0.536251 | Rpp38       |
| GO_CC_mzGO:00347Cmethylosor1/470     | 10/23583  | 0.182372 | 0.551296 | 0.536251 | Snrpb       |
| GO_CC_mzGO:003499microtubul 1/470    | 10/23583  | 0.182372 | 0.551296 | 0.536251 | Syne3       |
| GO_CC_mzGO:003499meiotic nuc1/470    | 10/23583  | 0.182372 | 0.551296 | 0.536251 | Syne3       |
| GO_CC_mzGO:004302NADPH oxi 1/470     | 10/23583  | 0.182372 | 0.551296 | 0.536251 | Cybb        |
| GO_CC_mzGO:00485Csignal reco 1/470   | 10/23583  | 0.182372 | 0.551296 | 0.536251 | Derl1       |
| GO_CC_mzGO:00512Ecell tip 1/470      | 10/23583  | 0.182372 | 0.551296 | 0.536251 | Pex5l       |
| GO_CC_mzGO:01060Enuclear me1/470     | 10/23583  | 0.182372 | 0.551296 | 0.536251 | Syne3       |
| GO_CC_mzGO:010609nuclear me1/470     | 10/23583  | 0.182372 | 0.551296 | 0.536251 | Syne3       |
| GO_CC_mzGO:004479nuclear tra 6/470   | 191/23583 | 0.182887 | 0.551296 | 0.536251 | Atf4/Cebpα  |
| GO_CC_mzGO:000581lipid drople3/470   | 75/23583  | 0.188326 | 0.551296 | 0.536251 | Acsl4/Mett  |
| GO_CC_mzGO:003509histone me3/470     | 75/23583  | 0.188326 | 0.551296 | 0.536251 | Prdm10/Pr   |
| GO_CC_mzGO:000593axoneme 4/470       | 115/23583 | 0.197185 | 0.551296 | 0.536251 | Ak8/Cfap4l  |
| GO_CC_mzGO:000152microfibril 1/470   | 11/23583  | 0.198674 | 0.551296 | 0.536251 | Mfap4       |
| GO_CC_mzGO:000217manchette 1/470     | 11/23583  | 0.198674 | 0.551296 | 0.536251 | Ran         |
| GO_CC_mzGO:000558fibrillar coll1/470 | 11/23583  | 0.198674 | 0.551296 | 0.536251 | Col2a1      |
| GO_CC_mzGO:000578signal reco 1/470   | 11/23583  | 0.198674 | 0.551296 | 0.536251 | Derl1       |
| GO_CC_mzGO:003146Cul4A-RIN 1/470     | 11/23583  | 0.198674 | 0.551296 | 0.536251 | Cop1        |
| GO_CC_mzGO:004262photorecep1/470     | 11/23583  | 0.198674 | 0.551296 | 0.536251 | Rom1        |
| GO_CC_mzGO:00617CGATOR2 c1/470       | 11/23583  | 0.198674 | 0.551296 | 0.536251 | Gatsl2      |
| GO_CC_mzGO:00708Ecell body fi1/470   | 11/23583  | 0.198674 | 0.551296 | 0.536251 | Penk        |
| GO_CC_mzGO:007254ER membrc1/470      | 11/23583  | 0.198674 | 0.551296 | 0.536251 | Emc4        |
| GO_CC_mzGO:009864banded col1/470     | 11/23583  | 0.198674 | 0.551296 | 0.536251 | Col2a1      |
| GO_CC_mzGO:009701ciliary plasr4/470  | 116/23583 | 0.201276 | 0.551296 | 0.536251 | Ak8/Cfap4l  |

|                                      |           |          |          |          |             |
|--------------------------------------|-----------|----------|----------|----------|-------------|
| GO_CC_mzGO:002262 cytosolic ril5/470 | 157/23583 | 0.204779 | 0.551296 | 0.536251 | Rack1/Mrp   |
| GO_CC_mzGO:003439 nuclear per4/470   | 117/23583 | 0.205392 | 0.551296 | 0.536251 | Atf4/Cad/C  |
| GO_CC_mzGO:000568 spliceosom6/470    | 199/23583 | 0.207254 | 0.551296 | 0.536251 | Cdc5l/Dcaf  |
| GO_CC_mzGO:012011 Sm-like prc3/470   | 80/23583  | 0.213929 | 0.551296 | 0.536251 | Dcaf4/Prpf  |
| GO_CC_mzGO:190255 serine/thre 3/470  | 80/23583  | 0.213929 | 0.551296 | 0.536251 | Cks1b/Gtf2  |
| GO_CC_mzGO:000017 nuclear exc1/470   | 12/23583  | 0.214651 | 0.551296 | 0.536251 | Exosc2      |
| GO_CC_mzGO:000034 transcriptic1/470  | 12/23583  | 0.214651 | 0.551296 | 0.536251 | Zc3h11a     |
| GO_CC_mzGO:000584 mRNA cap 1/470     | 12/23583  | 0.214651 | 0.551296 | 0.536251 | Ncbp2       |
| GO_CC_mzGO:001714 NMDA sele1/470     | 12/23583  | 0.214651 | 0.551296 | 0.536251 | Ptk2b       |
| GO_CC_mzGO:003067 ribonuclea1/470    | 12/23583  | 0.214651 | 0.551296 | 0.536251 | Rpp38       |
| GO_CC_mzGO:003114 pseudopoc1/470     | 12/23583  | 0.214651 | 0.551296 | 0.536251 | Klhl41      |
| GO_CC_mzGO:003451 RNA cap b1/470     | 12/23583  | 0.214651 | 0.551296 | 0.536251 | Ncbp2       |
| GO_CC_mzGO:003466 endoplasm1/470     | 12/23583  | 0.214651 | 0.551296 | 0.536251 | Ppib        |
| GO_CC_mzGO:003651 Derlin-1 re1/470   | 12/23583  | 0.214651 | 0.551296 | 0.536251 | Derl1       |
| GO_CC_mzGO:004240 nuclear inc1/470   | 12/23583  | 0.214651 | 0.551296 | 0.536251 | Pabpn1      |
| GO_CC_mzGO:004308 synaptic clc1/470  | 12/23583  | 0.214651 | 0.551296 | 0.536251 | Agrn        |
| GO_CC_mzGO:007156 npBAF cor1/470     | 12/23583  | 0.214651 | 0.551296 | 0.536251 | Smarcd1     |
| GO_CC_mzGO:003002 lamellipodi5/470   | 160/23583 | 0.215414 | 0.551296 | 0.536251 | Arap3/Myc   |
| GO_CC_mzGO:003013 endocytic v5/470   | 160/23583 | 0.215414 | 0.551296 | 0.536251 | Cybb/Rab1   |
| GO_CC_mzGO:003283 plasma me5/470     | 162/23583 | 0.222599 | 0.557704 | 0.542484 | Ak8/Cfap4l  |
| GO_CC_mzGO:000579 Golgi stack3/470   | 82/23583  | 0.224372 | 0.557704 | 0.542484 | Cit/Galnt2/ |
| GO_CC_mzGO:000219 zona pelluc1/470   | 13/23583  | 0.230311 | 0.557704 | 0.542484 | Zpbp        |
| GO_CC_mzGO:000591 fascia adhe1/470   | 13/23583  | 0.230311 | 0.557704 | 0.542484 | Nrap        |
| GO_CC_mzGO:000594 septin ring1/470   | 13/23583  | 0.230311 | 0.557704 | 0.542484 | 9-Sep       |
| GO_CC_mzGO:000854 proteasom1/470     | 13/23583  | 0.230311 | 0.557704 | 0.542484 | Psmc5       |
| GO_CC_mzGO:001710 aminoacyl-1/470    | 13/23583  | 0.230311 | 0.557704 | 0.542484 | Eprs        |
| GO_CC_mzGO:003110 septin com1/470    | 13/23583  | 0.230311 | 0.557704 | 0.542484 | 9-Sep       |
| GO_CC_mzGO:003159 cytosolic pi1/470  | 13/23583  | 0.230311 | 0.557704 | 0.542484 | Psmc5       |
| GO_CC_mzGO:003193 TORC2 cor1/470     | 13/23583  | 0.230311 | 0.557704 | 0.542484 | Pink1       |
| GO_CC_mzGO:003216 septin filar1/470  | 13/23583  | 0.230311 | 0.557704 | 0.542484 | 9-Sep       |
| GO_CC_mzGO:009744 astrocyte p1/470   | 13/23583  | 0.230311 | 0.557704 | 0.542484 | Pink1       |
| GO_CC_mzGO:004444 cytosolic pi8/470  | 294/23583 | 0.234347 | 0.564944 | 0.549526 | Bloc1s2/Ra  |
| GO_CC_mzGO:001593 small ribos3/470   | 85/23583  | 0.240215 | 0.569339 | 0.553801 | Rack1/Mrp   |
| GO_CC_mzGO:000078 nucleosom3/470     | 86/23583  | 0.245537 | 0.569339 | 0.553801 | H2afx/H3f3  |
| GO_CC_mzGO:000097 Prp19 com1/470     | 14/23583  | 0.245659 | 0.569339 | 0.553801 | Cdc5l       |
| GO_CC_mzGO:003000 TRAPP cor1/470     | 14/23583  | 0.245659 | 0.569339 | 0.553801 | Trappc12    |
| GO_CC_mzGO:003317 proton-tra1/470    | 14/23583  | 0.245659 | 0.569339 | 0.553801 | Atp6v1h     |
| GO_CC_mzGO:003339 chromatoic1/470    | 14/23583  | 0.245659 | 0.569339 | 0.553801 | Nsun2       |
| GO_CC_mzGO:003525 ciliary rootl1/470 | 14/23583  | 0.245659 | 0.569339 | 0.553801 | Crocc       |
| GO_CC_mzGO:007093 contractile 1/470  | 14/23583  | 0.245659 | 0.569339 | 0.553801 | Alkbh4      |
| GO_CC_mzGO:199002 mitotic spir1/470  | 14/23583  | 0.245659 | 0.569339 | 0.553801 | Aurkb       |
| GO_CC_mzGO:000077 condensed2/470     | 48/23583  | 0.24809  | 0.572515 | 0.556891 | Aurkb/Ss18  |
| GO_CC_mzGO:001636 nuclear ma3/470    | 87/23583  | 0.250878 | 0.576486 | 0.560753 | Cad/Cebpα   |
| GO_CC_mzGO:003011 clathrin cor2/470  | 49/23583  | 0.255499 | 0.576608 | 0.560873 | Ap2b1/Kcn   |
| GO_CC_mzGO:003130 integral cor5/470  | 172/23583 | 0.259517 | 0.576608 | 0.560873 | Lfng/Pink1. |
| GO_CC_mzGO:000017 cytoplasmic1/470   | 15/23583  | 0.260702 | 0.576608 | 0.560873 | Exosc2      |
| GO_CC_mzGO:000566 DNA replic1/470    | 15/23583  | 0.260702 | 0.576608 | 0.560873 | Cdc5l       |
| GO_CC_mzGO:003108 BLOC-1 co1/470     | 15/23583  | 0.260702 | 0.576608 | 0.560873 | Bloc1s2     |

|                                      |           |          |          |          |            |
|--------------------------------------|-----------|----------|----------|----------|------------|
| GO_CC_mzGO:003215septin cyto 1/470   | 15/23583  | 0.260702 | 0.576608 | 0.560873 | 9-Sep      |
| GO_CC_mzGO:003258Golgi cister 1/470  | 15/23583  | 0.260702 | 0.576608 | 0.560873 | Gpr89      |
| GO_CC_mzGO:003471SMN-Sm p 1/470      | 15/23583  | 0.260702 | 0.576608 | 0.560873 | Snrpb      |
| GO_CC_mzGO:003017integral coi 4/470  | 130/23583 | 0.26084  | 0.576608 | 0.560873 | Derl1/Emc4 |
| GO_CC_mzGO:007006extracellula 3/470  | 89/23583  | 0.261609 | 0.576608 | 0.560873 | Hnrnpa2b1  |
| GO_CC_mzGO:000079heterochro 3/470    | 90/23583  | 0.266997 | 0.583295 | 0.567377 | Rnf20/Rrp8 |
| GO_CC_mzGO:004320perikaryon 4/470    | 132/23583 | 0.269628 | 0.583295 | 0.567377 | Glul/Hnrnp |
| GO_CC_mzGO:003120SNARE con 2/470     | 51/23583  | 0.270325 | 0.583295 | 0.567377 | Cplx4/Vam  |
| GO_CC_mzGO:009956cytoplasmic 11/470  | 444/23583 | 0.27356  | 0.583295 | 0.567377 | Ak8/Cfap4  |
| GO_CC_mzGO:000566DNA-direc 1/470     | 16/23583  | 0.275445 | 0.583295 | 0.567377 | Chd6       |
| GO_CC_mzGO:000585muscle myo 1/470    | 16/23583  | 0.275445 | 0.583295 | 0.567377 | Myh11      |
| GO_CC_mzGO:001036chromocoe 1/470     | 16/23583  | 0.275445 | 0.583295 | 0.567377 | Aurkb      |
| GO_CC_mzGO:003585Seh1-assoc 1/470    | 16/23583  | 0.275445 | 0.583295 | 0.567377 | Gatsl2     |
| GO_CC_mzGO:003820TOR compl 1/470     | 16/23583  | 0.275445 | 0.583295 | 0.567377 | Pink1      |
| GO_CC_mzGO:004259lamellar bc 1/470   | 16/23583  | 0.275445 | 0.583295 | 0.567377 | Clip2      |
| GO_CC_mzGO:003646cytoplasmic 5/470   | 178/23583 | 0.282326 | 0.586304 | 0.570304 | Ddx3y/Hnr  |
| GO_CC_mzGO:005502nuclear DN 4/470    | 135/23583 | 0.282905 | 0.586304 | 0.570304 | Chd6/Gtf2  |
| GO_CC_mzGO:000587spindle mic 2/470   | 53/23583  | 0.285143 | 0.586304 | 0.570304 | Aurkb/Rab  |
| GO_CC_mzGO:000042DNA-direc 4/470     | 136/23583 | 0.287353 | 0.586304 | 0.570304 | Chd6/Gtf2  |
| GO_CC_mzGO:003122intrinsic coi 4/470 | 136/23583 | 0.287353 | 0.586304 | 0.570304 | Derl1/Emc4 |
| GO_CC_mzGO:004481DNA packe 3/470     | 94/23583  | 0.288664 | 0.586304 | 0.570304 | H2afx/H3f3 |
| GO_CC_mzGO:000564nuclear out 1/470   | 17/23583  | 0.289895 | 0.586304 | 0.570304 | Syne3      |
| GO_CC_mzGO:000577integral coi 1/470  | 17/23583  | 0.289895 | 0.586304 | 0.570304 | Slc27a2    |
| GO_CC_mzGO:003161spindle pol 1/470   | 17/23583  | 0.289895 | 0.586304 | 0.570304 | Aurkb      |
| GO_CC_mzGO:003298myosin fila 1/470   | 17/23583  | 0.289895 | 0.586304 | 0.570304 | Myh11      |
| GO_CC_mzGO:007100U2-type pr 1/470    | 17/23583  | 0.289895 | 0.586304 | 0.570304 | Snrpb      |
| GO_CC_mzGO:009864complex of 1/470    | 17/23583  | 0.289895 | 0.586304 | 0.570304 | Col2a1     |
| GO_CC_mzGO:000578endoplasm 2/470     | 54/23583  | 0.292542 | 0.588207 | 0.572155 | Slc27a2/Tx |
| GO_CC_mzGO:004445nucleolar p 5/470   | 181/23583 | 0.293874 | 0.588207 | 0.572155 | Acaca/Jmjc |
| GO_CC_mzGO:007268mitotic spir 3/470  | 95/23583  | 0.294104 | 0.588207 | 0.572155 | Aurkb/Ect2 |
| GO_CC_mzGO:003088RNA polyn 4/470     | 138/23583 | 0.296278 | 0.590369 | 0.574257 | Chd6/Gtf2  |
| GO_CC_mzGO:001647vacuolar pr 1/470   | 18/23583  | 0.304057 | 0.59891  | 0.582566 | Atp6v1h    |
| GO_CC_mzGO:003123intrinsic coi 1/470 | 18/23583  | 0.304057 | 0.59891  | 0.582566 | Slc27a2    |
| GO_CC_mzGO:003509ESC/E(Z) c 1/470    | 18/23583  | 0.304057 | 0.59891  | 0.582566 | Suz12      |
| GO_CC_mzGO:190536peptidase c 3/470   | 97/23583  | 0.305001 | 0.59891  | 0.582566 | Alad/Psmc  |
| GO_CC_mzGO:000584ribosome 7/470      | 275/23583 | 0.309592 | 0.6038   | 0.587322 | 2810006K2  |
| GO_CC_mzGO:000592cell-substr 4/470   | 141/23583 | 0.309727 | 0.6038   | 0.587322 | Nrap/Ptk2  |
| GO_CC_mzGO:003130intrinsic coi 5/470 | 186/23583 | 0.313292 | 0.60741  | 0.590834 | Lfng/Pink1 |
| GO_CC_mzGO:004439ribosomal s 6/470   | 231/23583 | 0.313829 | 0.60741  | 0.590834 | 2810006K2  |
| GO_CC_mzGO:000014exocyst 1/470       | 19/23583  | 0.317938 | 0.608817 | 0.592202 | Ralb       |
| GO_CC_mzGO:000093gamma-tu 1/470      | 19/23583  | 0.317938 | 0.608817 | 0.592202 | Bloc1s2    |
| GO_CC_mzGO:003109platelet alp 1/470  | 19/23583  | 0.317938 | 0.608817 | 0.592202 | Stxbp1     |
| GO_CC_mzGO:003198Golgi cister 2/470  | 59/23583  | 0.329332 | 0.622374 | 0.605389 | Cit/Gpr89  |
| GO_CC_mzGO:000592connexin c 1/470    | 20/23583  | 0.331542 | 0.622374 | 0.605389 | Gja4       |
| GO_CC_mzGO:000807guanylate c 1/470   | 20/23583  | 0.331542 | 0.622374 | 0.605389 | Gucy2c     |
| GO_CC_mzGO:003108BLOC com 1/470      | 20/23583  | 0.331542 | 0.622374 | 0.605389 | Bloc1s2    |
| GO_CC_mzGO:003136anchored c 1/470    | 20/23583  | 0.331542 | 0.622374 | 0.605389 | Izumo1r    |
| GO_CC_mzGO:003470ion channe 7/470    | 282/23583 | 0.331933 | 0.622374 | 0.605389 | Kcne4/Kcni |



|                                       |           |          |          |          |             |
|---------------------------------------|-----------|----------|----------|----------|-------------|
| GO_CC_mzGO:00059C clathrin-co 2/470   | 61/23583  | 0.34391  | 0.630895 | 0.613678 | Ap2b1/Selk  |
| GO_CC_mzGO:000574 mitochond 10/470    | 426/23583 | 0.344416 | 0.630895 | 0.613678 | Coq8b/Coc   |
| GO_CC_mzGO:000174 XY body 1/470       | 21/23583  | 0.344875 | 0.630895 | 0.613678 | H2afx       |
| GO_CC_mzGO:00056E U2 snRNP 1/470      | 21/23583  | 0.344875 | 0.630895 | 0.613678 | Snrpb       |
| GO_CC_mzGO:00056E telomerase 1/470    | 21/23583  | 0.344875 | 0.630895 | 0.613678 | Snrpb       |
| GO_CC_mzGO:003514 exon-exon 1/470     | 21/23583  | 0.344875 | 0.630895 | 0.613678 | Thrap3      |
| GO_CC_mzGO:003537 microtubul 1/470    | 21/23583  | 0.344875 | 0.630895 | 0.613678 | Clip2       |
| GO_CC_mzGO:00300E cell-substr 4/470   | 149/23583 | 0.345824 | 0.630895 | 0.613678 | Nrap/Ptk2k  |
| GO_CC_mzGO:00007E chromosom 3/470     | 106/23583 | 0.354108 | 0.637919 | 0.62051  | H2afx/H3fE  |
| GO_CC_mzGO:00059E cell cortex 7/470   | 290/23583 | 0.357737 | 0.637919 | 0.62051  | Grm7/Ooe    |
| GO_CC_mzGO:00056C basal lamir 1/470   | 22/23583  | 0.357943 | 0.637919 | 0.62051  | Agrn        |
| GO_CC_mzGO:00056E U1 snRNP 1/470      | 22/23583  | 0.357943 | 0.637919 | 0.62051  | Snrpb       |
| GO_CC_mzGO:00309E intraciliary 1/470  | 22/23583  | 0.357943 | 0.637919 | 0.62051  | Ttc30b      |
| GO_CC_mzGO:006007 inhibitory s 1/470  | 22/23583  | 0.357943 | 0.637919 | 0.62051  | Syt11       |
| GO_CC_mzGO:007101 prespliceos 1/470   | 22/23583  | 0.357943 | 0.637919 | 0.62051  | Snrpb       |
| GO_CC_mzGO:000017 exosome (f 1/470    | 23/23583  | 0.370751 | 0.648853 | 0.631146 | Exosc2      |
| GO_CC_mzGO:00058E proteasom 1/470     | 23/23583  | 0.370751 | 0.648853 | 0.631146 | Alad        |
| GO_CC_mzGO:00312E intrinsic coi 1/470 | 23/23583  | 0.370751 | 0.648853 | 0.631146 | Izumo1r     |
| GO_CC_mzGO:00436C nuclear rep 1/470   | 23/23583  | 0.370751 | 0.648853 | 0.631146 | Cdc5l       |
| GO_CC_mzGO:19053E exoribonuc 1/470    | 23/23583  | 0.370751 | 0.648853 | 0.631146 | Exosc2      |
| GO_CC_mzGO:00165E sarcoplasm 2/470    | 65/23583  | 0.372741 | 0.648853 | 0.631146 | Klhl41/Srl  |
| GO_CC_mzGO:00990E tethering c 2/470   | 65/23583  | 0.372741 | 0.648853 | 0.631146 | Ralb/Trapp  |
| GO_CC_mzGO:19024E transmemk 7/470     | 296/23583 | 0.37721  | 0.648853 | 0.631146 | Kcne4/Kcnq  |
| GO_CC_mzGO:00058E proteasom 1/470     | 24/23583  | 0.383304 | 0.648853 | 0.631146 | Psmc5       |
| GO_CC_mzGO:00164E myosin II ci 1/470  | 24/23583  | 0.383304 | 0.648853 | 0.631146 | Myh11       |
| GO_CC_mzGO:00300E desmosom 1/470      | 24/23583  | 0.383304 | 0.648853 | 0.631146 | Kazn        |
| GO_CC_mzGO:00308E rough endr 1/470    | 24/23583  | 0.383304 | 0.648853 | 0.631146 | Derl1       |
| GO_CC_mzGO:00308E replisome 1/470     | 24/23583  | 0.383304 | 0.648853 | 0.631146 | Cdc5l       |
| GO_CC_mzGO:00314E M band 1/470        | 24/23583  | 0.383304 | 0.648853 | 0.631146 | Klhl41      |
| GO_CC_mzGO:003301 sarcoplasm 1/470    | 24/23583  | 0.383304 | 0.648853 | 0.631146 | Klhl41      |
| GO_CC_mzGO:003317 proton-tra 1/470    | 24/23583  | 0.383304 | 0.648853 | 0.631146 | Atp6v1h     |
| GO_CC_mzGO:00312E extrinsic coi 3/470 | 113/23583 | 0.392028 | 0.660789 | 0.642756 | Csk/Frk/Ptk |
| GO_CC_mzGO:00057E endoplasm 2/470     | 68/23583  | 0.394026 | 0.660789 | 0.642756 | Tmed4/Tra   |
| GO_CC_mzGO:00325E integral coi 2/470  | 68/23583  | 0.394026 | 0.660789 | 0.642756 | Pink1/Tom   |
| GO_CC_mzGO:00353E transcriptic 1/470  | 25/23583  | 0.395607 | 0.661387 | 0.643337 | Ell         |
| GO_CC_mzGO:19903E transporter 7/470   | 303/23583 | 0.399984 | 0.663666 | 0.645555 | Kcne4/Kcnq  |
| GO_CC_mzGO:00056E replication 2/470   | 69/23583  | 0.401048 | 0.663666 | 0.645555 | Cdc5l/H2af  |
| GO_CC_mzGO:00056E U12-type s 1/470    | 26/23583  | 0.407665 | 0.663666 | 0.645555 | Snrpb       |
| GO_CC_mzGO:00226E proteasom 1/470     | 26/23583  | 0.407665 | 0.663666 | 0.645555 | Psmc5       |
| GO_CC_mzGO:00315E nucleotide 1/470    | 26/23583  | 0.407665 | 0.663666 | 0.645555 | Prkar1a     |
| GO_CC_mzGO:00344E centriolar s 1/470  | 26/23583  | 0.407665 | 0.663666 | 0.645555 | Mss51       |
| GO_CC_mzGO:00009E P-body 2/470        | 70/23583  | 0.408032 | 0.663666 | 0.645555 | Xrn1/Zc3h1  |
| GO_CC_mzGO:000577 autophago 2/470     | 70/23583  | 0.408032 | 0.663666 | 0.645555 | Nbr1/Ralb   |
| GO_CC_mzGO:009857 intrinsic coi 2/470 | 70/23583  | 0.408032 | 0.663666 | 0.645555 | Pink1/Tom   |
| GO_CC_mzGO:00005C proteasom 2/470     | 72/23583  | 0.421879 | 0.682588 | 0.66396  | Alad/Psmc1  |
| GO_CC_mzGO:19053E endopeptic 2/470    | 73/23583  | 0.42874  | 0.682588 | 0.66396  | Alad/Psmc1  |
| GO_CC_mzGO:00009E spindle pol 3/470   | 120/23583 | 0.429362 | 0.682588 | 0.66396  | Aurkb/Lats  |
| GO_CC_mzGO:00446E MLL1/2 coi 1/470    | 28/23583  | 0.431066 | 0.682588 | 0.66396  | Prpf31      |

|                   |                |        |           |          |          |          |            |
|-------------------|----------------|--------|-----------|----------|----------|----------|------------|
| GO_CC_mzGO:007133 | MLL1 complex   | 1/470  | 28/23583  | 0.431066 | 0.682588 | 0.66396  | Prpf31     |
| GO_CC_mzGO:199075 | microtubule    | 1/470  | 28/23583  | 0.431066 | 0.682588 | 0.66396  | Clip2      |
| GO_CC_mzGO:000588 | actin filament | 3/470  | 121/23583 | 0.434631 | 0.682588 | 0.66396  | Dyrk1a/Rac |
| GO_CC_mzGO:000172 | stress fiber   | 2/470  | 74/23583  | 0.435557 | 0.682588 | 0.66396  | Myh11/Seq  |
| GO_CC_mzGO:001652 | sarcoplasm     | 2/470  | 74/23583  | 0.435557 | 0.682588 | 0.66396  | Klh41/Srl  |
| GO_CC_mzGO:009751 | contractile    | 2/470  | 74/23583  | 0.435557 | 0.682588 | 0.66396  | Myh11/Seq  |
| GO_CC_mzGO:000587 | microtubule    | 9/470  | 412/23583 | 0.437405 | 0.682588 | 0.66396  | Aurkb/Clip |
| GO_CC_mzGO:003125 | cell leading   | 8/470  | 364/23583 | 0.43978  | 0.682588 | 0.66396  | Arap3/Atf4 |
| GO_CC_mzGO:000031 | organellar     | 1/470  | 29/23583  | 0.442418 | 0.682588 | 0.66396  | Mrps5      |
| GO_CC_mzGO:000576 | mitochondr     | 1/470  | 29/23583  | 0.442418 | 0.682588 | 0.66396  | Mrps5      |
| GO_CC_mzGO:003013 | clathrin ad    | 1/470  | 29/23583  | 0.442418 | 0.682588 | 0.66396  | Ap2b1      |
| GO_CC_mzGO:009743 | mitotic spir   | 1/470  | 29/23583  | 0.442418 | 0.682588 | 0.66396  | Aurkb      |
| GO_CC_mzGO:190255 | endoribon      | 1/470  | 29/23583  | 0.442418 | 0.682588 | 0.66396  | Rpp38      |
| GO_CC_mzGO:190534 | endonucle      | 1/470  | 29/23583  | 0.442418 | 0.682588 | 0.66396  | Rpp38      |
| GO_CC_mzGO:009879 | Golgi subc     | 9/470  | 416/23583 | 0.448703 | 0.690312 | 0.671473 | Bace1/Chst |
| GO_CC_mzGO:004278 | polysomal      | 1/470  | 30/23583  | 0.453544 | 0.695778 | 0.67679  | Zc3h15     |
| GO_CC_mzGO:000584 | polysome       | 2/470  | 77/23583  | 0.455741 | 0.696255 | 0.677254 | Unk/Zc3h1  |
| GO_CC_mzGO:001986 | organelle i    | 10/470 | 468/23583 | 0.456434 | 0.696255 | 0.677254 | Coq8b/Coc  |
| GO_CC_mzGO:004329 | contractile    | 5/470  | 223/23583 | 0.458534 | 0.696673 | 0.677661 | Itgb1bp2/k |
| GO_CC_mzGO:000040 | phagophor      | 1/470  | 31/23583  | 0.464449 | 0.696673 | 0.677661 | Nbr1       |
| GO_CC_mzGO:003066 | clathrin-co    | 1/470  | 31/23583  | 0.464449 | 0.696673 | 0.677661 | Vamp3      |
| GO_CC_mzGO:004247 | melanosom      | 1/470  | 31/23583  | 0.464449 | 0.696673 | 0.677661 | Gchfr      |
| GO_CC_mzGO:004877 | pigment gr     | 1/470  | 31/23583  | 0.464449 | 0.696673 | 0.677661 | Gchfr      |
| GO_CC_mzGO:005123 | spindle mic    | 1/470  | 31/23583  | 0.464449 | 0.696673 | 0.677661 | Aurkb      |
| GO_CC_mzGO:006169 | transferase    | 6/470  | 275/23583 | 0.469058 | 0.700504 | 0.681387 | Chd6/Cks1  |
| GO_CC_mzGO:000591 | cell-cell j    | 10/470 | 473/23583 | 0.469729 | 0.700504 | 0.681387 | Cd53/Csk/I |
| GO_CC_mzGO:003606 | ciliary basa   | 3/470  | 128/23583 | 0.470976 | 0.700504 | 0.681387 | 2700049AC  |
| GO_CC_mzGO:004443 | Golgi appa     | 10/470 | 474/23583 | 0.472381 | 0.700504 | 0.681387 | Agrp/Bace  |
| GO_CC_mzGO:007006 | cytochrom      | 1/470  | 32/23583  | 0.475136 | 0.700504 | 0.681387 | Cox10      |
| GO_CC_mzGO:009056 | nuclear tra    | 1/470  | 32/23583  | 0.475136 | 0.700504 | 0.681387 | Rrp8       |
| GO_CC_mzGO:004442 | extracellu     | 3/470  | 129/23583 | 0.476083 | 0.700504 | 0.681387 | Agrn/Col2a |
| GO_CC_mzGO:000077 | kinetochor     | 3/470  | 130/23583 | 0.481168 | 0.705357 | 0.686108 | Aurkb/Ss18 |
| GO_CC_mzGO:003068 | preribosom     | 2/470  | 81/23583  | 0.481994 | 0.705357 | 0.686108 | Pwp2/Utp1  |
| GO_CC_mzGO:003069 | 90S prerib     | 1/470  | 33/23583  | 0.485611 | 0.708729 | 0.689388 | Pwp2       |
| GO_CC_mzGO:000989 | cytoplasm      | 4/470  | 182/23583 | 0.492385 | 0.71555  | 0.696023 | Aspscr1/Cs |
| GO_CC_mzGO:000013 | Golgi mem      | 5/470  | 232/23583 | 0.492935 | 0.71555  | 0.696023 | Chst5/Gpr8 |
| GO_CC_mzGO:003243 | actin filam    | 2/470  | 83/23583  | 0.494825 | 0.715972 | 0.696432 | Myh11/Seq  |
| GO_CC_mzGO:000579 | smooth en      | 1/470  | 34/23583  | 0.495877 | 0.715972 | 0.696432 | Ppib       |
| GO_CC_mzGO:009706 | synaptic m     | 7/470  | 334/23583 | 0.499698 | 0.719565 | 0.699928 | Faim2/Grm  |
| GO_CC_mzGO:003586 | site of dou    | 1/470  | 35/23583  | 0.505938 | 0.723019 | 0.703287 | H2afx      |
| GO_CC_mzGO:000592 | focal adhe     | 3/470  | 135/23583 | 0.50623  | 0.723019 | 0.703287 | Ptk2b/Tgfb |
| GO_CC_mzGO:004444 | ciliary part   | 9/470  | 437/23583 | 0.507318 | 0.723019 | 0.703287 | 2700049AC  |
| GO_CC_mzGO:004264 | actomyosin     | 2/470  | 85/23583  | 0.507452 | 0.723019 | 0.703287 | Myh11/Seq  |
| GO_CC_mzGO:001000 | endosome       | 4/470  | 186/23583 | 0.509344 | 0.723805 | 0.704052 | Chmp3/Shc  |
| GO_CC_mzGO:000589 | voltage-ga     | 1/470  | 36/23583  | 0.515799 | 0.72914  | 0.709242 | Pde4d      |
| GO_CC_mzGO:001659 | mediator c     | 1/470  | 36/23583  | 0.515799 | 0.72914  | 0.709242 | Thrap3     |
| GO_CC_mzGO:000576 | early endo     | 5/470  | 239/23583 | 0.519126 | 0.73107  | 0.711119 | Bace1/Chr  |
| GO_CC_mzGO:003017 | filopodium     | 2/470  | 87/23583  | 0.519872 | 0.73107  | 0.711119 | Myo1g/Tw   |

|                               |        |           |          |          |          |             |
|-------------------------------|--------|-----------|----------|----------|----------|-------------|
| GO_CC_mzGO:000566transcripti  | 1/470  | 37/23583  | 0.525464 | 0.732011 | 0.712034 | Taf13       |
| GO_CC_mzGO:000172ruffle       | 3/470  | 139/23583 | 0.52582  | 0.732011 | 0.712034 | Arap3/Cit/  |
| GO_CC_mzGO:009868chromosom    | 6/470  | 293/23583 | 0.530433 | 0.732011 | 0.712034 | Aurkb/H2a   |
| GO_CC_mzGO:000031organellar   | 2/470  | 89/23583  | 0.532081 | 0.732011 | 0.712034 | 2810006K2   |
| GO_CC_mzGO:000576mitochond    | 2/470  | 89/23583  | 0.532081 | 0.732011 | 0.712034 | 2810006K2   |
| GO_CC_mzGO:003042growth cor   | 4/470  | 192/23583 | 0.53429  | 0.732011 | 0.712034 | Agrn/Auts2  |
| GO_CC_mzGO:003017integral coi | 1/470  | 38/23583  | 0.534936 | 0.732011 | 0.712034 | Lfng        |
| GO_CC_mzGO:009073site of DN   | 1/470  | 38/23583  | 0.534936 | 0.732011 | 0.712034 | H2afx       |
| GO_CC_mzGO:009754ciliary base | 1/470  | 38/23583  | 0.534936 | 0.732011 | 0.712034 | lft122      |
| GO_CC_mzGO:004217nuclear out  | 10/470 | 498/23583 | 0.535051 | 0.732011 | 0.712034 | Derl1/Emc4  |
| GO_CC_mzGO:004257immunoglc    | 3/470  | 141/23583 | 0.535453 | 0.732011 | 0.712034 | Ighv1-23/ly |
| GO_CC_mzGO:000566transcripti  | 8/470  | 399/23583 | 0.542783 | 0.735816 | 0.715735 | Atf4/Cebp4  |
| GO_CC_mzGO:003131extrinsic co | 1/470  | 39/23583  | 0.54422  | 0.735816 | 0.715735 | Coq8b       |
| GO_CC_mzGO:004429axonal gro   | 1/470  | 39/23583  | 0.54422  | 0.735816 | 0.715735 | Agrn        |
| GO_CC_mzGO:009773non-motile   | 3/470  | 143/23583 | 0.544974 | 0.735816 | 0.715735 | lft122/Rom  |
| GO_CC_mzGO:001623aggresome    | 1/470  | 40/23583  | 0.553318 | 0.735816 | 0.715735 | Rnf32       |
| GO_CC_mzGO:003122intrinsic co | 1/470  | 40/23583  | 0.553318 | 0.735816 | 0.715735 | Lfng        |
| GO_CC_mzGO:004359nuclear rep  | 1/470  | 40/23583  | 0.553318 | 0.735816 | 0.715735 | Cdc5l       |
| GO_CC_mzGO:006007excitatory   | 1/470  | 40/23583  | 0.553318 | 0.735816 | 0.715735 | Syt11       |
| GO_CC_mzGO:001981immunoglc    | 3/470  | 145/23583 | 0.554381 | 0.735816 | 0.715735 | Ighv1-23/ly |
| GO_CC_mzGO:003125leading ed   | 3/470  | 145/23583 | 0.554381 | 0.735816 | 0.715735 | Atf4/Myo1   |
| GO_CC_mzGO:003042site of pola | 4/470  | 197/23583 | 0.554587 | 0.735816 | 0.715735 | Agrn/Auts2  |
| GO_CC_mzGO:009856cytoplasmic  | 4/470  | 197/23583 | 0.554587 | 0.735816 | 0.715735 | Aspscr1/Cs  |
| GO_CC_mzGO:002262cytosolic la | 2/470  | 94/23583  | 0.561665 | 0.741834 | 0.721589 | Mrto4/Rpl2  |
| GO_CC_mzGO:003146cullin-RIN   | 4/470  | 199/23583 | 0.562573 | 0.741834 | 0.721589 | Cks1b/Dca   |
| GO_CC_mzGO:007016anchoring    | 6/470  | 303/23583 | 0.563245 | 0.741834 | 0.721589 | Kazn/Nrap   |
| GO_CC_mzGO:000575mitochond    | 5/470  | 253/23583 | 0.569675 | 0.748365 | 0.727942 | 2810006K2   |
| GO_CC_mzGO:000572nuclear het  | 1/470  | 42/23583  | 0.570975 | 0.748365 | 0.727942 | Suz12       |
| GO_CC_mzGO:001593large ribos  | 3/470  | 149/23583 | 0.572843 | 0.748995 | 0.728555 | 2810006K2   |
| GO_CC_mzGO:000581spindle      | 5/470  | 255/23583 | 0.576671 | 0.75218  | 0.731653 | Aurkb/Ect2  |
| GO_CC_mzGO:000992basal plas   | 1/470  | 43/23583  | 0.579541 | 0.752288 | 0.731758 | Muc20       |
| GO_CC_mzGO:003167A band       | 1/470  | 43/23583  | 0.579541 | 0.752288 | 0.731758 | Klhl41      |
| GO_CC_mzGO:00003Ccyclin-dep   | 1/470  | 44/23583  | 0.587936 | 0.758427 | 0.737729 | Cks1b       |
| GO_CC_mzGO:003239photorecep   | 1/470  | 44/23583  | 0.587936 | 0.758427 | 0.737729 | lft122      |
| GO_CC_mzGO:003011membrane     | 2/470  | 99/23583  | 0.589888 | 0.758427 | 0.737729 | Ap2b1/Kcn   |
| GO_CC_mzGO:004847coated me    | 2/470  | 99/23583  | 0.589888 | 0.758427 | 0.737729 | Ap2b1/Kcn   |
| GO_CC_mzGO:012011neuron prc   | 1/470  | 45/23583  | 0.596163 | 0.764128 | 0.743274 | Hnrnpa2b1   |
| GO_CC_mzGO:003001myofibril    | 4/470  | 209/23583 | 0.601295 | 0.764128 | 0.743274 | Itgb1bp2/k  |
| GO_CC_mzGO:004444endosomal    | 4/470  | 209/23583 | 0.601295 | 0.764128 | 0.743274 | Chmp3/Shc   |
| GO_CC_mzGO:007256blood micr   | 3/470  | 156/23583 | 0.603983 | 0.764128 | 0.743274 | Ighv1-23/ly |
| GO_CC_mzGO:009898neuron to    | 15/470 | 263/23583 | 0.604045 | 0.764128 | 0.743274 | Grm7/Mtm    |
| GO_CC_mzGO:003259dendrite m   | 1/470  | 46/23583  | 0.604227 | 0.764128 | 0.743274 | Atf4        |
| GO_CC_mzGO:006017ciliary mer  | 1/470  | 46/23583  | 0.604227 | 0.764128 | 0.743274 | Rom1        |
| GO_CC_mzGO:000578endoplasm    | 9/470  | 476/23583 | 0.610227 | 0.766938 | 0.746008 | Derl1/Emc4  |
| GO_CC_mzGO:00056Cbasement     | 12/470 | 103/23583 | 0.611478 | 0.766938 | 0.746008 | Agrn/Col2a  |
| GO_CC_mzGO:000929nucleoid     | 1/470  | 47/23583  | 0.61213  | 0.766938 | 0.746008 | Fastkd2     |
| GO_CC_mzGO:004264mitochond    | 1/470  | 47/23583  | 0.61213  | 0.766938 | 0.746008 | Fastkd2     |
| GO_CC_mzGO:003011AP-type m    | 1/470  | 48/23583  | 0.619875 | 0.774844 | 0.753698 | Ap2b1       |

|                                      |           |          |          |          |             |
|--------------------------------------|-----------|----------|----------|----------|-------------|
| GO_CC_mzGO:19902Coxidoreduc2/470     | 106/23583 | 0.627094 | 0.777138 | 0.755929 | Cybb/Gpd    |
| GO_CC_mzGO:000191photorecep1/470     | 49/23583  | 0.627467 | 0.777138 | 0.755929 | Crocc       |
| GO_CC_mzGO:001646proton-tra1/470     | 49/23583  | 0.627467 | 0.777138 | 0.755929 | Atp6v1h     |
| GO_CC_mzGO:003151PcG protei1/470     | 49/23583  | 0.627467 | 0.777138 | 0.755929 | Suz12       |
| GO_CC_mzGO:009773photorecep2/470     | 107/23583 | 0.63219  | 0.779259 | 0.757992 | Ift122/Rom  |
| GO_CC_mzGO:003013COPII-coat1/470     | 50/23583  | 0.634907 | 0.779259 | 0.757992 | Tmed4       |
| GO_CC_mzGO:000032lytic vacuol8/470   | 433/23583 | 0.634952 | 0.779259 | 0.757992 | Atp6v1h/Bl  |
| GO_CC_mzGO:000576lysosome 8/470      | 433/23583 | 0.634952 | 0.779259 | 0.757992 | Atp6v1h/Bl  |
| GO_CC_mzGO:009882endoplasm9/470      | 489/23583 | 0.642056 | 0.78619  | 0.764735 | Derl1/Emc   |
| GO_CC_mzGO:000832ionotropic 1/470    | 53/23583  | 0.656348 | 0.798879 | 0.777077 | Ptk2b       |
| GO_CC_mzGO:003612sperm flag2/470     | 112/23583 | 0.656856 | 0.798879 | 0.777077 | Ak8/Ran     |
| GO_CC_mzGO:0097739+0 non-n2/470      | 112/23583 | 0.656856 | 0.798879 | 0.777077 | Ift122/Rom  |
| GO_CC_mzGO:000031organellar 1/470    | 54/23583  | 0.663213 | 0.800371 | 0.778528 | 2810006K2   |
| GO_CC_mzGO:000153cornified e1/470    | 54/23583  | 0.663213 | 0.800371 | 0.778528 | Kazn        |
| GO_CC_mzGO:000576mitochond1/470      | 54/23583  | 0.663213 | 0.800371 | 0.778528 | 2810006K2   |
| GO_CC_mzGO:004485plasma me 2/470     | 114/23583 | 0.666346 | 0.800371 | 0.778528 | Prkar1a/Se  |
| GO_CC_mzGO:0097729+2 motile 2/470    | 114/23583 | 0.666346 | 0.800371 | 0.778528 | Ak8/Ran     |
| GO_CC_mzGO:003101extracellula8/470   | 447/23583 | 0.66976  | 0.800371 | 0.778528 | Agrn/Ambj   |
| GO_CC_mzGO:00347Ccalcium ch1/470     | 55/23583  | 0.66994  | 0.800371 | 0.778528 | Pde4d       |
| GO_CC_mzGO:009887neurotrans 1/470    | 55/23583  | 0.66994  | 0.800371 | 0.778528 | Ptk2b       |
| GO_CC_mzGO:004517intercellula 1/470  | 56/23583  | 0.676533 | 0.806464 | 0.784455 | Fastkd2     |
| GO_CC_mzGO:000591adherens j15/470    | 287/23583 | 0.679759 | 0.808524 | 0.786459 | Nrap/Ptk2k  |
| GO_CC_mzGO:003014secretory g7/470    | 398/23583 | 0.682704 | 0.810242 | 0.78813  | Clip2/Klk1C |
| GO_CC_mzGO:00466Eanchored c1/470     | 58/23583  | 0.689328 | 0.81631  | 0.794033 | Izumo1r     |
| GO_CC_mzGO:003013transport v5/470    | 291/23583 | 0.69139  | 0.816439 | 0.794158 | Mttr2/Rak   |
| GO_CC_mzGO:003151motile cilium 3/470 | 179/23583 | 0.695339 | 0.816439 | 0.794158 | Ak8/Ran/R   |
| GO_CC_mzGO:004319dendritic s3/470    | 179/23583 | 0.695339 | 0.816439 | 0.794158 | Mttr2/Ptk   |
| GO_CC_mzGO:003196nuclear me4/470     | 238/23583 | 0.701152 | 0.816439 | 0.794158 | Gchfr/Rnf6  |
| GO_CC_mzGO:003066Golgi-asso 1/470    | 60/23583  | 0.701618 | 0.816439 | 0.794158 | Gpr89       |
| GO_CC_mzGO:000591cell-cell ad2/470   | 122/23583 | 0.7022   | 0.816439 | 0.794158 | Nrap/Ptpr   |
| GO_CC_mzGO:00443Cneuron spir3/470    | 181/23583 | 0.702477 | 0.816439 | 0.794158 | Mttr2/Ptk   |
| GO_CC_mzGO:004444cell cortex 3/470   | 181/23583 | 0.702477 | 0.816439 | 0.794158 | Ralb/Sele/S |
| GO_CC_mzGO:001989extrinsic co5/470   | 296/23583 | 0.705519 | 0.816439 | 0.794158 | Coq8b/Asp   |
| GO_CC_mzGO:000579Golgi-asso 2/470    | 123/23583 | 0.706449 | 0.816439 | 0.794158 | Gpr89/Tme   |
| GO_CC_mzGO:000011histone de1/470     | 61/23583  | 0.70758  | 0.816439 | 0.794158 | Hr          |
| GO_CC_mzGO:00147Cintercalate1/470    | 61/23583  | 0.70758  | 0.816439 | 0.794158 | Nrap        |
| GO_CC_mzGO:001989extrinsic co3/470   | 183/23583 | 0.709487 | 0.816894 | 0.7946   | Csk/Frk/Ptk |
| GO_CC_mzGO:000079condensed3/470      | 185/23583 | 0.71637  | 0.823064 | 0.800602 | Aurkb/H2a   |
| GO_CC_mzGO:000165fibrillar cen2/470  | 128/23583 | 0.726943 | 0.833438 | 0.810693 | Acaca/Rpp   |
| GO_CC_mzGO:000077chromosom3/470      | 189/23583 | 0.729757 | 0.834891 | 0.812106 | Aurkb/Ss1E  |
| GO_CC_mzGO:004443cytoplasmic8/470    | 475/23583 | 0.733074 | 0.836321 | 0.813497 | Chmp3/Gp    |
| GO_CC_mzGO:003258ruffle mem 1/470    | 66/23583  | 0.735653 | 0.836321 | 0.813497 | Twf1        |
| GO_CC_mzGO:004517basal part 1/470    | 66/23583  | 0.735653 | 0.836321 | 0.813497 | Muc20       |
| GO_CC_mzGO:00059Cbrush bord2/470     | 131/23583 | 0.738649 | 0.83704  | 0.814197 | Cybrd1/My   |
| GO_CC_mzGO:003258neuron prc1/470     | 67/23583  | 0.740936 | 0.83704  | 0.814197 | Atf4        |
| GO_CC_mzGO:004319dendritic s1/470    | 67/23583  | 0.740936 | 0.83704  | 0.814197 | Grm7        |
| GO_CC_mzGO:000564nuclear poi1/470    | 68/23583  | 0.746114 | 0.839838 | 0.816918 | Ran         |
| GO_CC_mzGO:000802synaptic ve3/470    | 195/23583 | 0.7489   | 0.839838 | 0.816918 | Mttr2/Syt   |

|                                       |           |          |          |          |             |
|---------------------------------------|-----------|----------|----------|----------|-------------|
| GO_CC_mzGO:00057E mitochond 1/470     | 69/23583  | 0.751188 | 0.839838 | 0.816918 | Pink1       |
| GO_CC_mzGO:00306E coated ves 1/470    | 69/23583  | 0.751188 | 0.839838 | 0.816918 | Vamp3       |
| GO_CC_mzGO:00315Z brush bord 1/470    | 69/23583  | 0.751188 | 0.839838 | 0.816918 | Cybrd1      |
| GO_CC_mzGO:00190C SCF ubiquit 1/470   | 70/23583  | 0.756161 | 0.841342 | 0.818381 | Cks1b       |
| GO_CC_mzGO:00314E Cul3-RING 1/470     | 70/23583  | 0.756161 | 0.841342 | 0.818381 | Klh41       |
| GO_CC_mzGO:00432E apical junct 2/470  | 136/23583 | 0.757208 | 0.841342 | 0.818381 | Ect2/Frmd6  |
| GO_CC_mzGO:00315E neuromusc 1/470     | 71/23583  | 0.761035 | 0.842146 | 0.819163 | Prkar1a     |
| GO_CC_mzGO:004444 contractile 3/470   | 199/23583 | 0.76105  | 0.842146 | 0.819163 | Itgb1bp2/k  |
| GO_CC_mzGO:003227 asymmetric 4/470    | 260/23583 | 0.763985 | 0.843664 | 0.82064  | Grm7/Mtm    |
| GO_CC_mzGO:00358E ciliary trans 1/470 | 72/23583  | 0.765812 | 0.843956 | 0.820924 | Ift122      |
| GO_CC_mzGO:00987E mitochond 4/470     | 262/23583 | 0.769151 | 0.845664 | 0.822585 | 2810006K2   |
| GO_CC_mzGO:00166C PML body 1/470      | 73/23583  | 0.770494 | 0.845664 | 0.822585 | Rnf6        |
| GO_CC_mzGO:00007E nuclear chr 1/470   | 74/23583  | 0.775082 | 0.848974 | 0.825805 | H3f3b       |
| GO_CC_mzGO:00017E photorecep 1/470    | 76/23583  | 0.783986 | 0.856988 | 0.833601 | Rom1        |
| GO_CC_mzGO:00442E cell-cell co 1/470  | 79/23583  | 0.796686 | 0.869112 | 0.845393 | Nrap        |
| GO_CC_mzGO:00703E exocytic ve 3/470   | 213/23583 | 0.799863 | 0.870818 | 0.847053 | Mtmr2/Syt   |
| GO_CC_mzGO:00444E mitochond 3/470     | 214/23583 | 0.802422 | 0.871847 | 0.848054 | Coq8b/Pin1  |
| GO_CC_mzGO:00055E collagen tri 1/470  | 82/23583  | 0.808641 | 0.875082 | 0.851201 | Col2a1      |
| GO_CC_mzGO:003197 organelle e 1/470   | 82/23583  | 0.808641 | 0.875082 | 0.851201 | Pink1       |
| GO_CC_mzGO:00001E ubiquitin li 5/470  | 340/23583 | 0.810384 | 0.875215 | 0.85133  | Cks1b/Dca   |
| GO_CC_mzGO:00423E sarcolemm 2/470     | 154/23583 | 0.814864 | 0.876258 | 0.852345 | Agrn/Sgcd   |
| GO_CC_mzGO:00312E cell project 4/470  | 282/23583 | 0.816047 | 0.876258 | 0.852345 | Atf4/Cybrd  |
| GO_CC_mzGO:00170E transcriptic 1/470  | 84/23583  | 0.816218 | 0.876258 | 0.852345 | Rrp8        |
| GO_CC_mzGO:00451Z membrane 5/470      | 350/23583 | 0.829538 | 0.887031 | 0.862824 | Csk/Faim2/  |
| GO_CC_mzGO:00988E membrane 5/470      | 350/23583 | 0.829538 | 0.887031 | 0.862824 | Csk/Faim2/  |
| GO_CC_mzGO:00059C microvillus 1/470   | 92/23583  | 0.84365  | 0.899889 | 0.875331 | Myo1g       |
| GO_CC_mzGO:00059C caveola 1/470       | 93/23583  | 0.846779 | 0.899889 | 0.875331 | Sele        |
| GO_CC_mzGO:000557 proteinace 5/470    | 361/23583 | 0.848764 | 0.899889 | 0.875331 | Agrn/Bmp4   |
| GO_CC_mzGO:00985E membrane 5/470      | 362/23583 | 0.850419 | 0.899889 | 0.875331 | Csk/Faim2/  |
| GO_CC_mzGO:00301E clathrin-co 1/470   | 95/23583  | 0.852849 | 0.899889 | 0.875331 | Vamp3       |
| GO_CC_mzGO:00301E coated ves 2/470    | 169/23583 | 0.853228 | 0.899889 | 0.875331 | Tmed4/Var   |
| GO_CC_mzGO:00312Z anchored c 2/470    | 169/23583 | 0.853228 | 0.899889 | 0.875331 | Izumo1r/Ly  |
| GO_CC_mzGO:00007E condensed 3/470     | 238/23583 | 0.856034 | 0.901088 | 0.876497 | Aurkb/H2a   |
| GO_CC_mzGO:00125C vesicle mer 4/470   | 304/23583 | 0.858308 | 0.901725 | 0.877116 | Aspscr1/Sp  |
| GO_CC_mzGO:00972Z sperm part 3/470    | 242/23583 | 0.863617 | 0.90554  | 0.880827 | Ak8/Ran/Z   |
| GO_CC_mzGO:00988C plasma me 2/470     | 175/23583 | 0.866436 | 0.906736 | 0.881991 | Il12rb1/Ptk |
| GO_CC_mzGO:00432E receptor cc 5/470   | 374/23583 | 0.869137 | 0.907803 | 0.883028 | Grm7/Il12r  |
| GO_CC_mzGO:00988E cluster of a 2/470  | 182/23583 | 0.880464 | 0.917858 | 0.89281  | Cybrd1/My   |
| GO_CC_mzGO:003001 sarcomere 2/470     | 185/23583 | 0.886049 | 0.919492 | 0.894399 | Itgb1bp2/k  |
| GO_CC_mzGO:00140E postsynapt 3/470    | 256/23583 | 0.88746  | 0.919492 | 0.894399 | Mtmr2/Ptk   |
| GO_CC_mzGO:00058C trans-Golg 2/470    | 186/23583 | 0.887857 | 0.919492 | 0.894399 | Bace1/Rab   |
| GO_CC_mzGO:004521 postsynapt 3/470    | 258/23583 | 0.890545 | 0.919492 | 0.894399 | Faim2/Grm   |
| GO_CC_mzGO:009957 postsynapt 3/470    | 258/23583 | 0.890545 | 0.919492 | 0.894399 | Mtmr2/Ptk   |
| GO_CC_mzGO:00350E micro-ribo 1/470    | 115/23583 | 0.901797 | 0.929333 | 0.903971 | Mirlet7f-1  |
| GO_CC_mzGO:00308E cortical cyt 1/470  | 117/23583 | 0.905692 | 0.931568 | 0.906146 | Sele        |
| GO_CC_mzGO:00988E actin-base 2/470    | 199/23583 | 0.909055 | 0.931865 | 0.906434 | Myo1g/Tw    |
| GO_CC_mzGO:00059Z bicellular ti 1/470 | 119/23583 | 0.909432 | 0.931865 | 0.906434 | Ect2        |
| GO_CC_mzGO:00306E cytoplasmic 3/470   | 274/23583 | 0.912617 | 0.932007 | 0.906572 | Spire2/Van  |

|                                |        |           |          |          |          |             |
|--------------------------------|--------|-----------|----------|----------|----------|-------------|
| GO_CC_mzGO:003001Z disc        | 1/470  | 122/23583 | 0.914766 | 0.932007 | 0.906572 | Itgb1bp2    |
| GO_CC_mzGO:007016occluding j   | 1/470  | 122/23583 | 0.914766 | 0.932007 | 0.906572 | Ect2        |
| GO_CC_mzGO:000588intermedia    | 1/470  | 123/23583 | 0.916473 | 0.932007 | 0.906572 | Dyrk1a      |
| GO_CC_mzGO:004320myelin she    | 2/470  | 213/23583 | 0.92766  | 0.941609 | 0.915912 | Glul/Stxbp1 |
| GO_CC_mzGO:000166acrosomal     | 1/470  | 134/23583 | 0.933146 | 0.944986 | 0.919197 | Zpbp        |
| GO_CC_mzGO:003167I band        | 1/470  | 135/23583 | 0.934486 | 0.944986 | 0.919197 | Itgb1bp2    |
| GO_CC_mzGO:001632apical plas   | 3/470  | 306/23583 | 0.945081 | 0.953914 | 0.927881 | Kcne4/Muc   |
| GO_CC_mzGO:000587microtubul    | 1/470  | 148/23583 | 0.949652 | 0.956739 | 0.930629 | Aurkb       |
| GO_CC_mzGO:004517apical part   | 4/470  | 403/23583 | 0.961102 | 0.966429 | 0.940054 | Kcne4/Muc   |
| GO_CC_mzGO:004511intermedia    | 1/470  | 163/23583 | 0.962849 | 0.966429 | 0.940054 | Dyrk1a      |
| GO_CC_mzGO:000989external sic  | 5/470  | 491/23583 | 0.968914 | 0.970711 | 0.94422  | Ighv1-23/It |
| GO_CC_mzGO:001632basolateral   | 1/470  | 223/23583 | 0.989009 | 0.989009 | 0.962018 | Muc20       |
| GO_CC_mzGO:004430neuron prc    | 13/540 | 211/23583 | 0.001217 | 0.430625 | 0.403725 | Calb2/Dixd  |
| GO_CC_mzGO:004367axon termi    | 12/540 | 194/23583 | 0.001791 | 0.430625 | 0.403725 | Calb2/Dixd  |
| GO_CC_mzGO:004319terminal bc   | 8/540  | 120/23583 | 0.006443 | 0.430625 | 0.403725 | Calb2/Grik4 |
| GO_CC_mzGO:003012AP-1 adap     | 2/540  | 6/23583   | 0.007385 | 0.430625 | 0.403725 | Ap1g2/Slc1  |
| GO_CC_mzGO:003298kainate sel   | 2/540  | 6/23583   | 0.007385 | 0.430625 | 0.403725 | Grik2/Grik4 |
| GO_CC_mzGO:199046omegasom      | 2/540  | 7/23583   | 0.010183 | 0.430625 | 0.403725 | Trim12c/Tr  |
| GO_CC_mzGO:009722sperm part    | 12/540 | 242/23583 | 0.01028  | 0.430625 | 0.403725 | Adam24/C    |
| GO_CC_mzGO:006007excitatory    | 4/540  | 40/23583  | 0.012952 | 0.430625 | 0.403725 | Lrrtm1/Nlg  |
| GO_CC_mzGO:000586troponin c    | 2/540  | 8/23583   | 0.013373 | 0.430625 | 0.403725 | Tnni2/Tnnt  |
| GO_CC_mzGO:004525pyruvate d    | 2/540  | 8/23583   | 0.013373 | 0.430625 | 0.403725 | Dlat/Dld    |
| GO_CC_mzGO:009858membrane      | 15/540 | 362/23583 | 0.020468 | 0.430625 | 0.403725 | Cd46/Fam1   |
| GO_CC_mzGO:000081ESCRT I coi   | 2/540  | 10/23583  | 0.020851 | 0.430625 | 0.403725 | Ubp1/Vp     |
| GO_CC_mzGO:003013clathrin co   | 2/540  | 10/23583  | 0.020851 | 0.430625 | 0.403725 | Ap1g2/Slc1  |
| GO_CC_mzGO:009753ciliary trans | 2/540  | 10/23583  | 0.020851 | 0.430625 | 0.403725 | Cep164/Sc   |
| GO_CC_mzGO:015003distal axon   | 15/540 | 364/23583 | 0.021378 | 0.430625 | 0.403725 | Calb2/Dixd  |
| GO_CC_mzGO:001601dystrobrevi   | 1/540  | 1/23583   | 0.022898 | 0.430625 | 0.403725 | Dtna        |
| GO_CC_mzGO:001628eukaryotic    | 1/540  | 1/23583   | 0.022898 | 0.430625 | 0.403725 | Dhx29       |
| GO_CC_mzGO:003247cytoplasmic   | 1/540  | 1/23583   | 0.022898 | 0.430625 | 0.403725 | Lrrk2       |
| GO_CC_mzGO:003628Cdc48p-Nj     | 1/540  | 1/23583   | 0.022898 | 0.430625 | 0.403725 | Ankzf1      |
| GO_CC_mzGO:009061meiotic spi   | 1/540  | 1/23583   | 0.022898 | 0.430625 | 0.403725 | Ccdc155     |
| GO_CC_mzGO:009940caveola ne    | 1/540  | 1/23583   | 0.022898 | 0.430625 | 0.403725 | Lrrk2       |
| GO_CC_mzGO:004443cytoplasmic   | 18/540 | 475/23583 | 0.026482 | 0.430625 | 0.403725 | Ap1g2/Ap    |
| GO_CC_mzGO:000017nuclear exc   | 2/540  | 12/23583  | 0.029673 | 0.430625 | 0.403725 | Dis3/Exosc  |
| GO_CC_mzGO:001714NMDA sele     | 2/540  | 12/23583  | 0.029673 | 0.430625 | 0.403725 | Grin2c/Nlg  |
| GO_CC_mzGO:003612CatSper co    | 2/540  | 12/23583  | 0.029673 | 0.430625 | 0.403725 | Catsper4/C  |
| GO_CC_mzGO:009722sperm prin    | 3/540  | 30/23583  | 0.030663 | 0.430625 | 0.403725 | Catsper4/C  |
| GO_CC_mzGO:000832ionotropic    | 4/540  | 53/23583  | 0.032957 | 0.430625 | 0.403725 | Grik2/Grik4 |
| GO_CC_mzGO:001632basolateral   | 10/540 | 223/23583 | 0.033377 | 0.430625 | 0.403725 | Aqp5/Cd46   |
| GO_CC_mzGO:000581centriole     | 6/540  | 105/23583 | 0.033781 | 0.430625 | 0.403725 | Ccdc92/Cc   |
| GO_CC_mzGO:001251trans-Golg    | 2/540  | 13/23583  | 0.034545 | 0.430625 | 0.403725 | Ap1g2/Slc1  |
| GO_CC_mzGO:000166acrosomal     | 7/540  | 134/23583 | 0.034814 | 0.430625 | 0.403725 | Catsper4/C  |
| GO_CC_mzGO:000586striated m    | 3/540  | 32/23583  | 0.036233 | 0.430625 | 0.403725 | Mybph/Tnr   |
| GO_CC_mzGO:009879presynapse    | 15/540 | 391/23583 | 0.036847 | 0.430625 | 0.403725 | Bcl2l1/Calb |
| GO_CC_mzGO:009887neurotrans    | 4/540  | 55/23583  | 0.037057 | 0.430625 | 0.403725 | Grik2/Grik4 |
| GO_CC_mzGO:000581centrosom     | 18/540 | 498/23583 | 0.039276 | 0.430625 | 0.403725 | Ccdc187/A   |
| GO_CC_mzGO:003014secretory g   | 15/540 | 398/23583 | 0.041923 | 0.430625 | 0.403725 | Avp/Catspe  |

|                                     |           |          |          |          |             |
|-------------------------------------|-----------|----------|----------|----------|-------------|
| GO_CC_mεGO:003637myofilamer3/540    | 34/23583  | 0.042284 | 0.430625 | 0.403725 | Mybph/Tnr   |
| GO_CC_mεGO:00988εpostsynapt3/540    | 34/23583  | 0.042284 | 0.430625 | 0.403725 | Grik2/Grik4 |
| GO_CC_mεGO:000017cytoplasmic2/540   | 15/23583  | 0.04513  | 0.430625 | 0.403725 | Dis3/Exosc  |
| GO_CC_mεGO:00431εP granule 2/540    | 15/23583  | 0.04513  | 0.430625 | 0.403725 | Mov10l1/P   |
| GO_CC_mεGO:00454εpole plasm2/540    | 15/23583  | 0.04513  | 0.430625 | 0.403725 | Mov10l1/P   |
| GO_CC_mεGO:00602εgerm plasn2/540    | 15/23583  | 0.04513  | 0.430625 | 0.403725 | Mov10l1/P   |
| GO_CC_mεGO:000567transcriptic1/540  | 2/23583   | 0.045272 | 0.430625 | 0.403725 | Gtf2e1      |
| GO_CC_mεGO:00059εglycine cle1/540   | 2/23583   | 0.045272 | 0.430625 | 0.403725 | Gcsh        |
| GO_CC_mεGO:00191εsnRNA-act1/540     | 2/23583   | 0.045272 | 0.430625 | 0.403725 | Snapc1      |
| GO_CC_mεGO:003141NatB comp1/540     | 2/23583   | 0.045272 | 0.430625 | 0.403725 | Naa25       |
| GO_CC_mεGO:003557azurophil c1/540   | 2/23583   | 0.045272 | 0.430625 | 0.403725 | Prtn3       |
| GO_CC_mεGO:00447εamphisomε1/540     | 2/23583   | 0.045272 | 0.430625 | 0.403725 | Lrrk2       |
| GO_CC_mεGO:007072BMP recep1/540     | 2/23583   | 0.045272 | 0.430625 | 0.403725 | Bmp2        |
| GO_CC_mεGO:00709εtranslation 1/540  | 2/23583   | 0.045272 | 0.430625 | 0.403725 | Dhx29       |
| GO_CC_mεGO:19026εkinociliary l1/540 | 2/23583   | 0.045272 | 0.430625 | 0.403725 | Mkks        |
| GO_CC_mεGO:199074microvesicl1/540   | 2/23583   | 0.045272 | 0.430625 | 0.403725 | Syt4        |
| GO_CC_mεGO:00332εaxon part 16/540   | 437/23583 | 0.045374 | 0.430625 | 0.403725 | Calb2/Dixd  |
| GO_CC_mεGO:00448εplasma me 6/540    | 114/23583 | 0.047329 | 0.44086  | 0.413321 | Hck/Hk1/Li  |
| GO_CC_mεGO:00163εnuclear ma5/540    | 87/23583  | 0.049535 | 0.45298  | 0.424684 | Ghrhr/Hes1  |
| GO_CC_mεGO:00996εpostsynapt3/540    | 37/23583  | 0.052243 | 0.45298  | 0.424684 | Grik2/Grik4 |
| GO_CC_mεGO:00343εnuclear per6/540   | 117/23583 | 0.052494 | 0.45298  | 0.424684 | Ghrhr/Hes1  |
| GO_CC_mεGO:003151motile ciliu 8/540 | 179/23583 | 0.054388 | 0.45298  | 0.424684 | Catsper4/C  |
| GO_CC_mεGO:003017integral coi3/540  | 38/23583  | 0.055792 | 0.45298  | 0.424684 | Ier3ip1/Pcs |
| GO_CC_mεGO:00444εmicrotubul 7/540   | 149/23583 | 0.055953 | 0.45298  | 0.424684 | Ccdc92/Cc   |
| GO_CC_mεGO:000564nuclear out2/540   | 17/23583  | 0.056735 | 0.45298  | 0.424684 | Ccdc155/G   |
| GO_CC_mεGO:00058εacetylcholin2/540  | 17/23583  | 0.056735 | 0.45298  | 0.424684 | Chrna4/Ch   |
| GO_CC_mεGO:006182sperm hear2/540    | 17/23583  | 0.056735 | 0.45298  | 0.424684 | Adam24/Ti   |
| GO_CC_mεGO:00059εmicrovillus 5/540  | 92/23583  | 0.060224 | 0.458943 | 0.430274 | Aqp5/Enpp   |
| GO_CC_mεGO:004512membrane 13/540    | 350/23583 | 0.060832 | 0.458943 | 0.430274 | Gpm6b/Hc    |
| GO_CC_mεGO:00988εmembrane 13/540    | 350/23583 | 0.060832 | 0.458943 | 0.430274 | Gpm6b/Hc    |
| GO_CC_mεGO:00059εcaveola 5/540      | 93/23583  | 0.062507 | 0.458943 | 0.430274 | Hck/Hk1/Li  |
| GO_CC_mεGO:003122intrinsic coi3/540 | 40/23583  | 0.063223 | 0.458943 | 0.430274 | Ier3ip1/Pcs |
| GO_CC_mεGO:00059εmitochond 1/540    | 3/23583   | 0.067135 | 0.458943 | 0.430274 | Dlat        |
| GO_CC_mεGO:000597ribonucleo1/540    | 3/23583   | 0.067135 | 0.458943 | 0.430274 | Rrm2        |
| GO_CC_mεGO:00351CFACT com1/540      | 3/23583   | 0.067135 | 0.458943 | 0.430274 | Mms22l      |
| GO_CC_mεGO:00970εCRLF-CLCF1/540     | 3/23583   | 0.067135 | 0.458943 | 0.430274 | Crlf1       |
| GO_CC_mεGO:00985εcytoplasmic1/540   | 3/23583   | 0.067135 | 0.458943 | 0.430274 | Exoc1       |
| GO_CC_mεGO:00431εdendritic sl4/540  | 67/23583  | 0.067518 | 0.458943 | 0.430274 | Grm4/Nlgr   |
| GO_CC_mεGO:00056εnuclear inn3/540   | 42/23583  | 0.071085 | 0.47047  | 0.441081 | Ankle1/Ghi  |
| GO_CC_mεGO:000572nuclear het3/540   | 42/23583  | 0.071085 | 0.47047  | 0.441081 | Kdm4b/Sat   |
| GO_CC_mεGO:004521postsynapt10/540   | 258/23583 | 0.074254 | 0.482685 | 0.452533 | Chrna4/Ch   |
| GO_CC_mεGO:00450εkeratin filar3/540 | 43/23583  | 0.075173 | 0.482685 | 0.452533 | Fam83h/Kr   |
| GO_CC_mεGO:00430εcostamere 2/540    | 20/23583  | 0.075809 | 0.482685 | 0.452533 | Svil/Trpc1  |
| GO_CC_mεGO:00432Cperikaryon 6/540   | 132/23583 | 0.083287 | 0.489174 | 0.458617 | Grik2/Grik4 |
| GO_CC_mεGO:00970εsynaptic m12/540   | 334/23583 | 0.084277 | 0.489174 | 0.458617 | Chrna4/Ch   |
| GO_CC_mεGO:00988εactin-base8/540    | 199/23583 | 0.088041 | 0.489174 | 0.458617 | Aqp5/Enpp   |
| GO_CC_mεGO:000207inner acros1/540   | 4/23583   | 0.088499 | 0.489174 | 0.458617 | Cd46        |
| GO_CC_mεGO:003477secretory g1/540   | 4/23583   | 0.088499 | 0.489174 | 0.458617 | Prtn3       |

|                                             |           |          |          |          |             |
|---------------------------------------------|-----------|----------|----------|----------|-------------|
| GO_CC_mGO:004282TAP compl 1/540             | 4/23583   | 0.088499 | 0.489174 | 0.458617 | Pdia3       |
| GO_CC_mGO:00602C cytoplasmic 1/540          | 4/23583   | 0.088499 | 0.489174 | 0.458617 | Prtn3       |
| GO_CC_mGO:007044elongin core 1/540          | 4/23583   | 0.088499 | 0.489174 | 0.458617 | Epop        |
| GO_CC_mGO:00710C U2-type protein 1/540      | 4/23583   | 0.088499 | 0.489174 | 0.458617 | Gcfc2       |
| GO_CC_mGO:00974E multivesicular 1/540       | 4/23583   | 0.088499 | 0.489174 | 0.458617 | Lrrk2       |
| GO_CC_mGO:00988E postsynaptic 1/540         | 4/23583   | 0.088499 | 0.489174 | 0.458617 | Stx12       |
| GO_CC_mGO:19906E USH2 complex 1/540         | 4/23583   | 0.088499 | 0.489174 | 0.458617 | Whrn        |
| GO_CC_mGO:000572 pericentric 2/540          | 22/23583  | 0.089486 | 0.489253 | 0.45869  | Kdm4b/Kdm4c |
| GO_CC_mGO:001632 apical plasma 11/540       | 306/23583 | 0.095139 | 0.498334 | 0.467205 | Aqp5/Crb3   |
| GO_CC_mGO:000017 exosome (f) 2/540          | 23/23583  | 0.096576 | 0.498334 | 0.467205 | Dis3/Exosc  |
| GO_CC_mGO:003012 clathrin vesicle 2/540     | 23/23583  | 0.096576 | 0.498334 | 0.467205 | Ap1g2/Slc1  |
| GO_CC_mGO:00347C sodium channel 2/540       | 23/23583  | 0.096576 | 0.498334 | 0.467205 | Grik2/Grik4 |
| GO_CC_mGO:19053E exoribonuclease 2/540      | 23/23583  | 0.096576 | 0.498334 | 0.467205 | Dis3/Exosc  |
| GO_CC_mGO:003011 AP-type membrane 3/540     | 48/23583  | 0.097091 | 0.498334 | 0.467205 | Ap1g2/Ap3   |
| GO_CC_mGO:003011 clathrin coat 3/540        | 49/23583  | 0.101754 | 0.504724 | 0.473196 | Ap1g2/Sclt  |
| GO_CC_mGO:00020E acrosomal 2/540            | 24/23583  | 0.103819 | 0.504724 | 0.473196 | Cd46/Fam1   |
| GO_CC_mGO:00364E ESCRT complex 2/540        | 24/23583  | 0.103819 | 0.504724 | 0.473196 | Ubp1/Vps    |
| GO_CC_mGO:00988C plasma membrane 7/540      | 175/23583 | 0.108214 | 0.504724 | 0.473196 | Bmp2/Chrr   |
| GO_CC_mGO:00020E outer acrosome 1/540       | 5/23583   | 0.109374 | 0.504724 | 0.473196 | Fam170b     |
| GO_CC_mGO:00059E phosphorylation 1/540      | 5/23583   | 0.109374 | 0.504724 | 0.473196 | Phkg2       |
| GO_CC_mGO:003131 extrinsic coat 1/540       | 5/23583   | 0.109374 | 0.504724 | 0.473196 | Sox10       |
| GO_CC_mGO:00364E keratohyalin 1/540         | 5/23583   | 0.109374 | 0.504724 | 0.473196 | Cela2a      |
| GO_CC_mGO:004282 MHC class 1/540            | 5/23583   | 0.109374 | 0.504724 | 0.473196 | Pdia3       |
| GO_CC_mGO:00431E acrosomal 1/540            | 5/23583   | 0.109374 | 0.504724 | 0.473196 | Dld         |
| GO_CC_mGO:007154 piP-body 1/540             | 5/23583   | 0.109374 | 0.504724 | 0.473196 | Piwil4      |
| GO_CC_mGO:003612 sperm flagellum 5/540      | 112/23583 | 0.114812 | 0.518056 | 0.485694 | Catsper4/C  |
| GO_CC_mGO:00347C ion channel 10/540         | 282/23583 | 0.115183 | 0.518056 | 0.485694 | Catsper4/C  |
| GO_CC_mGO:00364E cytoplasmic 7/540          | 178/23583 | 0.115508 | 0.518056 | 0.485694 | Atxn2/Cap   |
| GO_CC_mGO:00344E centriolar satellite 2/540 | 26/23583  | 0.118721 | 0.518056 | 0.485694 | Cep131/Sd   |
| GO_CC_mGO:009772 9+2 motile 5/540           | 114/23583 | 0.121255 | 0.518056 | 0.485694 | Catsper4/C  |
| GO_CC_mGO:00350E micro-ribosome 5/540       | 115/23583 | 0.124539 | 0.518056 | 0.485694 | Mir106b/M   |
| GO_CC_mGO:000802 transcriptic 3/540         | 54/23583  | 0.126332 | 0.518056 | 0.485694 | Ctr9/Epop   |
| GO_CC_mGO:00306E preribosome 2/540          | 27/23583  | 0.126361 | 0.518056 | 0.485694 | Nip7/Nsa2   |
| GO_CC_mGO:000214 stereocilia 1/540          | 6/23583   | 0.129771 | 0.518056 | 0.485694 | Whrn        |
| GO_CC_mGO:000214 stereocilia 1/540          | 6/23583   | 0.129771 | 0.518056 | 0.485694 | Whrn        |
| GO_CC_mGO:00308E checkpoint 1/540           | 6/23583   | 0.129771 | 0.518056 | 0.485694 | Oraov1      |
| GO_CC_mGO:00443E pinosome 1/540             | 6/23583   | 0.129771 | 0.518056 | 0.485694 | Carmil2     |
| GO_CC_mGO:00443E macropinosome 1/540        | 6/23583   | 0.129771 | 0.518056 | 0.485694 | Carmil2     |
| GO_CC_mGO:00971E Bcl-2 family 1/540         | 6/23583   | 0.129771 | 0.518056 | 0.485694 | Bcl2l1      |
| GO_CC_mGO:009742 microtubule 1/540          | 6/23583   | 0.129771 | 0.518056 | 0.485694 | Atat1       |
| GO_CC_mGO:00975E transcriptic 1/540         | 6/23583   | 0.129771 | 0.518056 | 0.485694 | Gtf2e1      |
| GO_CC_mGO:199007 periciliary ring 1/540     | 6/23583   | 0.129771 | 0.518056 | 0.485694 | Whrn        |
| GO_CC_mGO:004517 intercellular 3/540        | 56/23583  | 0.136705 | 0.527338 | 0.494397 | Cep131/Fa   |
| GO_CC_mGO:00306E transport vesicle 5/540    | 119/23583 | 0.138076 | 0.527338 | 0.494397 | Ap1g2/Bcl2  |
| GO_CC_mGO:00198E outer membrane 7/540       | 187/23583 | 0.138874 | 0.527338 | 0.494397 | Ankzf1/Bcl2 |
| GO_CC_mGO:00319E organelle contact 7/540    | 187/23583 | 0.138874 | 0.527338 | 0.494397 | Ankzf1/Bcl2 |
| GO_CC_mGO:003577 ribonucleoprotein 7/540    | 188/23583 | 0.141603 | 0.527338 | 0.494397 | Atxn2/Cap   |
| GO_CC_mGO:00301E clathrin adaptor 2/540     | 29/23583  | 0.141969 | 0.527338 | 0.494397 | Ap1g2/Slc1  |



|                               |         |           |          |          |          |             |
|-------------------------------|---------|-----------|----------|----------|----------|-------------|
| GO_CC_mεGO:19024εtransmembr   | 10/540  | 296/23583 | 0.143908 | 0.527338 | 0.494397 | Catsper4/C  |
| GO_CC_mεGO:00466εanchored c   | 3/540   | 58/23583  | 0.147357 | 0.527338 | 0.494397 | Mdga1/Prr   |
| GO_CC_mεGO:00021εstereocilia  | 1/540   | 7/23583   | 0.149703 | 0.527338 | 0.494397 | Whrn        |
| GO_CC_mεGO:001627prefoldin c  | 1/540   | 7/23583   | 0.149703 | 0.527338 | 0.494397 | Pfdn4       |
| GO_CC_mεGO:003091Smc5-Smc     | 1/540   | 7/23583   | 0.149703 | 0.527338 | 0.494397 | Eid3        |
| GO_CC_mεGO:00452εoxoglutar    | 1/540   | 7/23583   | 0.149703 | 0.527338 | 0.494397 | Dld         |
| GO_CC_mεGO:007154pi-body      | 1/540   | 7/23583   | 0.149703 | 0.527338 | 0.494397 | Mov1011     |
| GO_CC_mεGO:01060εSUMO liga    | 1/540   | 7/23583   | 0.149703 | 0.527338 | 0.494397 | Eid3        |
| GO_CC_mεGO:19906εproximal d   | 1/540   | 7/23583   | 0.149703 | 0.527338 | 0.494397 | Ptpn5       |
| GO_CC_mεGO:199091sperm hear   | 1/540   | 7/23583   | 0.149703 | 0.527338 | 0.494397 | Adam24      |
| GO_CC_mεGO:003014trans-Golg   | 2/540   | 30/23583  | 0.149919 | 0.527338 | 0.494397 | Ap1g2/Slc1  |
| GO_CC_mεGO:00007εheterochro   | 4/540   | 90/23583  | 0.151628 | 0.529646 | 0.496561 | Kdm4b/Kd    |
| GO_CC_mεGO:00306εclathrin-co  | 2/540   | 31/23583  | 0.157956 | 0.541785 | 0.507941 | Ap1g2/Slc1  |
| GO_CC_mεGO:00328εdendrite cy  | 2/540   | 31/23583  | 0.157956 | 0.541785 | 0.507941 | Grik2/Lrrk2 |
| GO_CC_mεGO:19903εtransporter  | 10/540  | 303/23583 | 0.15954  | 0.541785 | 0.507941 | Catsper4/C  |
| GO_CC_mεGO:00059εclathrin-co  | 3/540   | 61/23583  | 0.163815 | 0.541785 | 0.507941 | Atat1/Bcl2l |
| GO_CC_mεGO:00985εcytoplasmic  | 7/540   | 197/23583 | 0.167293 | 0.541785 | 0.507941 | Dsg1a/Dtn   |
| GO_CC_mεGO:00059εcAMP-dep     | 1/540   | 8/23583   | 0.169179 | 0.541785 | 0.507941 | Prkar1b     |
| GO_CC_mεGO:00082εF-actin cap  | 1/540   | 8/23583   | 0.169179 | 0.541785 | 0.507941 | Carmil2     |
| GO_CC_mεGO:00165εCdc73/Paf    | 1/540   | 8/23583   | 0.169179 | 0.541785 | 0.507941 | Ctr9        |
| GO_CC_mεGO:00432εaxon hillock | 1/540   | 8/23583   | 0.169179 | 0.541785 | 0.507941 | Prkc2       |
| GO_CC_mεGO:009884postsynapt   | 1/540   | 8/23583   | 0.169179 | 0.541785 | 0.507941 | Stx12       |
| GO_CC_mεGO:003017integral col | 5/540   | 130/23583 | 0.178361 | 0.541785 | 0.507941 | Elovl2/Pdia |
| GO_CC_mεGO:00306εcytoplasmic  | 9/540   | 274/23583 | 0.178895 | 0.541785 | 0.507941 | Ap1g2/Ap    |
| GO_CC_mεGO:00083εIkappaB kir  | 1/540   | 9/23583   | 0.188209 | 0.541785 | 0.507941 | Map3k13     |
| GO_CC_mεGO:003161nuclear per  | 1/540   | 9/23583   | 0.188209 | 0.541785 | 0.507941 | Kdm4b       |
| GO_CC_mεGO:003574myelin she   | 1/540   | 9/23583   | 0.188209 | 0.541785 | 0.507941 | Prkc2       |
| GO_CC_mεGO:004517apical cort  | ε1/540  | 9/23583   | 0.188209 | 0.541785 | 0.507941 | Prkc2       |
| GO_CC_mεGO:007101post-mRN     | 1/540   | 9/23583   | 0.188209 | 0.541785 | 0.507941 | Gcfc2       |
| GO_CC_mεGO:00714εclathrin cor | 1/540   | 9/23583   | 0.188209 | 0.541785 | 0.507941 | Sc11        |
| GO_CC_mεGO:19909εWnt signal   | 1/540   | 9/23583   | 0.188209 | 0.541785 | 0.507941 | Lrrk2       |
| GO_CC_mεGO:00058εheterotrim   | ε2/540  | 35/23583  | 0.190808 | 0.541785 | 0.507941 | Gng10/Gng   |
| GO_CC_mεGO:00081εCOP9 sign    | ε2/540  | 35/23583  | 0.190808 | 0.541785 | 0.507941 | Cops7a/Nc   |
| GO_CC_mεGO:00358εsite of dou  | ε2/540  | 35/23583  | 0.190808 | 0.541785 | 0.507941 | Kdm4d/Ori   |
| GO_CC_mεGO:19053εGTPase cor   | ε2/540  | 35/23583  | 0.190808 | 0.541785 | 0.507941 | Gng10/Gng   |
| GO_CC_mεGO:003011membrane     | 4/540   | 99/23583  | 0.191904 | 0.541785 | 0.507941 | Ap1g2/Ap    |
| GO_CC_mεGO:004847coated me    | ε4/540  | 99/23583  | 0.191904 | 0.541785 | 0.507941 | Ap1g2/Ap    |
| GO_CC_mεGO:005502nuclear DN   | ε5/540  | 135/23583 | 0.197984 | 0.541785 | 0.507941 | Ctdp1/Ctr9  |
| GO_CC_mεGO:00058εvoltage-ga   | ε2/540  | 36/23583  | 0.199161 | 0.541785 | 0.507941 | Catsper4/C  |
| GO_CC_mεGO:00150εCajal body   | 2/540   | 36/23583  | 0.199161 | 0.541785 | 0.507941 | Ak6/Isg20   |
| GO_CC_mεGO:000042DNA-direc    | ε5/540  | 136/23583 | 0.201995 | 0.541785 | 0.507941 | Ctdp1/Ctr9  |
| GO_CC_mεGO:003122intrinsic co | ε5/540  | 136/23583 | 0.201995 | 0.541785 | 0.507941 | Elovl2/Pdia |
| GO_CC_mεGO:00313εintegral col | ε6/540  | 172/23583 | 0.202798 | 0.541785 | 0.507941 | Ankle1/Ier  |
| GO_CC_mεGO:000564nuclear poi  | ε3/540  | 68/23583  | 0.204099 | 0.541785 | 0.507941 | Mad211/Mc   |
| GO_CC_mεGO:003001myofibril    | 7/540   | 209/23583 | 0.204444 | 0.541785 | 0.507941 | Rpl6l/Myb   |
| GO_CC_mεGO:00347εcation char  | 7/540   | 209/23583 | 0.204444 | 0.541785 | 0.507941 | Catsper4/C  |
| GO_CC_mεGO:004444endosomal    | 7/540   | 209/23583 | 0.204444 | 0.541785 | 0.507941 | Cyb561a3/   |
| GO_CC_mεGO:00056εnuclear en   | ε12/540 | 399/23583 | 0.206614 | 0.541785 | 0.507941 | Ankle1/Ccc  |

|                                       |           |          |          |          |             |
|---------------------------------------|-----------|----------|----------|----------|-------------|
| GO_CC_mGO:000577vacuolar lu 1/540     | 10/23583  | 0.206804 | 0.541785 | 0.507941 | Prtn3       |
| GO_CC_mGO:003141N-terminal1/540       | 10/23583  | 0.206804 | 0.541785 | 0.507941 | Naa25       |
| GO_CC_mGO:00319Evesicle lum 1/540     | 10/23583  | 0.206804 | 0.541785 | 0.507941 | Prtn3       |
| GO_CC_mGO:00349Cmicrotubul 1/540      | 10/23583  | 0.206804 | 0.541785 | 0.507941 | Ccdc155     |
| GO_CC_mGO:00349Emeiotic nur 1/540     | 10/23583  | 0.206804 | 0.541785 | 0.507941 | Ccdc155     |
| GO_CC_mGO:00442Cdendritic g 1/540     | 10/23583  | 0.206804 | 0.541785 | 0.507941 | Ptch1       |
| GO_CC_mGO:004524dihydrolipc 1/540     | 10/23583  | 0.206804 | 0.541785 | 0.507941 | Dld         |
| GO_CC_mGO:00487Epresynaptic 1/540     | 10/23583  | 0.206804 | 0.541785 | 0.507941 | Grm4        |
| GO_CC_mGO:00600Ekinocilium 1/540      | 10/23583  | 0.206804 | 0.541785 | 0.507941 | Mkks        |
| GO_CC_mGO:00977E9+2 non-n 1/540       | 10/23583  | 0.206804 | 0.541785 | 0.507941 | Mkks        |
| GO_CC_mGO:01060Enuclear me 1/540      | 10/23583  | 0.206804 | 0.541785 | 0.507941 | Ccdc155     |
| GO_CC_mGO:01060Cnuclear me 1/540      | 10/23583  | 0.206804 | 0.541785 | 0.507941 | Ccdc155     |
| GO_CC_mGO:00056Ereplication 3/540     | 69/23583  | 0.210033 | 0.542169 | 0.508302 | D330045A    |
| GO_CC_mGO:00308E RNA polyn 5/540      | 138/23583 | 0.210099 | 0.542169 | 0.508302 | Ctdp1/Ctr9  |
| GO_CC_mGO:004517apical part 12/540    | 403/23583 | 0.215947 | 0.542169 | 0.508302 | Aqp5/Crb3   |
| GO_CC_mGO:00907Esite of DN 2/540      | 38/23583  | 0.215988 | 0.542169 | 0.508302 | Kdm4d/Ori   |
| GO_CC_mGO:00009EP-body 3/540          | 70/23583  | 0.216004 | 0.542169 | 0.508302 | Caprin1/Tri |
| GO_CC_mGO:000217manchette 1/540       | 11/23583  | 0.224975 | 0.542169 | 0.508302 | Cep131      |
| GO_CC_mGO:00055E fibrillar coll 1/540 | 11/23583  | 0.224975 | 0.542169 | 0.508302 | Col27a1     |
| GO_CC_mGO:00300Emitochond 1/540       | 11/23583  | 0.224975 | 0.542169 | 0.508302 | Fdx1        |
| GO_CC_mGO:00425EMCM com 1/540         | 11/23583  | 0.224975 | 0.542169 | 0.508302 | Mms22l      |
| GO_CC_mGO:004461nuclear poi 1/540     | 11/23583  | 0.224975 | 0.542169 | 0.508302 | Nxt1        |
| GO_CC_mGO:00447E autolysoso 1/540     | 11/23583  | 0.224975 | 0.542169 | 0.508302 | Lrrk2       |
| GO_CC_mGO:007057RISC-loadi 1/540      | 11/23583  | 0.224975 | 0.542169 | 0.508302 | Mir28a      |
| GO_CC_mGO:00708E cell body fi 1/540   | 11/23583  | 0.224975 | 0.542169 | 0.508302 | Srd5a1      |
| GO_CC_mGO:00726E meiotic spi 1/540    | 11/23583  | 0.224975 | 0.542169 | 0.508302 | Ccdc155     |
| GO_CC_mGO:009864banded col 1/540      | 11/23583  | 0.224975 | 0.542169 | 0.508302 | Col27a1     |
| GO_CC_mGO:19909C beta-caten 1/540     | 11/23583  | 0.224975 | 0.542169 | 0.508302 | Tle4        |
| GO_CC_mGO:19902C oxidoreduc 4/540     | 106/23583 | 0.225275 | 0.542169 | 0.508302 | Dlat/Dld/G  |
| GO_CC_mGO:00321E cleavage ft 2/540    | 40/23583  | 0.232935 | 0.557935 | 0.523082 | Nf2/Rhob    |
| GO_CC_mGO:00098C cytoplasmic 6/540    | 182/23583 | 0.239426 | 0.566633 | 0.530953 | Dsg1a/Dtn   |
| GO_CC_mGO:00432E receptor cc 11/540   | 374/23583 | 0.240531 | 0.566633 | 0.530953 | Bmp2/Chrr   |
| GO_CC_mGO:003012AP-2 adap 1/540       | 12/23583  | 0.242729 | 0.566633 | 0.530953 | Slc18a3     |
| GO_CC_mGO:003012AP-3 adap 1/540       | 12/23583  | 0.242729 | 0.566633 | 0.530953 | Ap3s1       |
| GO_CC_mGO:009752sperm plas 1/540      | 12/23583  | 0.242729 | 0.566633 | 0.530953 | Adam24      |
| GO_CC_mGO:00198C extrinsic co 6/540   | 183/23583 | 0.243196 | 0.566633 | 0.530953 | Cdh26/Dtn   |
| GO_CC_mGO:00165C DNA-direc 4/540      | 110/23583 | 0.244973 | 0.56784  | 0.532368 | Ctdp1/Ctr9  |
| GO_CC_mGO:00432C contractile 7/540    | 223/23583 | 0.25129  | 0.571263 | 0.535578 | Rpl6l/Mybr  |
| GO_CC_mGO:00058C trans-Golg 6/540     | 186/23583 | 0.254607 | 0.571263 | 0.535578 | Ap1g2/Ap3   |
| GO_CC_mGO:00100C endosome 6/540       | 186/23583 | 0.254607 | 0.571263 | 0.535578 | Cyb561a3/   |
| GO_CC_mGO:00313C intrinsic co 6/540   | 186/23583 | 0.254607 | 0.571263 | 0.535578 | Ankle1/Ier3 |
| GO_CC_mGO:003167A band 2/540          | 43/23583  | 0.258483 | 0.571263 | 0.535578 | Rpl6l/Mybr  |
| GO_CC_mGO:00312E extrinsic co 4/540   | 113/23583 | 0.259987 | 0.571263 | 0.535578 | Dtna/Gng1   |
| GO_CC_mGO:00057E primary lys 1/540    | 13/23583  | 0.260078 | 0.571263 | 0.535578 | Prtn3       |
| GO_CC_mGO:003012clathrin co 1/540     | 13/23583  | 0.260078 | 0.571263 | 0.535578 | Slc18a3     |
| GO_CC_mGO:00319E TORC2 cor 1/540      | 13/23583  | 0.260078 | 0.571263 | 0.535578 | Prr5        |
| GO_CC_mGO:00425E azurophil c 1/540    | 13/23583  | 0.260078 | 0.571263 | 0.535578 | Prtn3       |
| GO_CC_mGO:00452E tricarboxyli 1/540   | 13/23583  | 0.260078 | 0.571263 | 0.535578 | Dld         |

|                                    |           |          |          |          |             |
|------------------------------------|-----------|----------|----------|----------|-------------|
| GO_CC_mGO:009744astrocyte p1/540   | 13/23583  | 0.260078 | 0.571263 | 0.535578 | Syt4        |
| GO_CC_mGO:00125C vesicle mer9/540  | 304/23583 | 0.263352 | 0.575939 | 0.539961 | Ap1g2/Apf   |
| GO_CC_mGO:004273presynaptic3/540   | 78/23583  | 0.264855 | 0.57672  | 0.540694 | Grik2/Grik4 |
| GO_CC_mGO:001049cytoplasmic2/540   | 45/23583  | 0.275541 | 0.587958 | 0.55123  | Atxn2/Cap1  |
| GO_CC_mGO:012011neuron prc2/540    | 45/23583  | 0.275541 | 0.587958 | 0.55123  | Grik2/Lrrk2 |
| GO_CC_mGO:000573DNA-direc1/540     | 14/23583  | 0.27703  | 0.587958 | 0.55123  | Ippk        |
| GO_CC_mGO:000576secondary 1/540    | 14/23583  | 0.27703  | 0.587958 | 0.55123  | Lrrk2       |
| GO_CC_mGO:003066clathrin-co1/540   | 14/23583  | 0.27703  | 0.587958 | 0.55123  | Slc18a3     |
| GO_CC_mGO:009879outer mito1/540    | 14/23583  | 0.27703  | 0.587958 | 0.55123  | Ankzf1      |
| GO_CC_mGO:003068periboson3/540     | 81/23583  | 0.283526 | 0.599217 | 0.561786 | Nip7/Nol10  |
| GO_CC_mGO:003108BLOC-1 co1/540     | 15/23583  | 0.293594 | 0.615325 | 0.576887 | Stx12       |
| GO_CC_mGO:004324Fanconi an1/540    | 15/23583  | 0.293594 | 0.615325 | 0.576887 | Fanci       |
| GO_CC_mGO:004533phagocytic3/540    | 83/23583  | 0.296036 | 0.617867 | 0.57927  | Fmn11/Pld4  |
| GO_CC_mGO:003196nuclear me7/540    | 238/23583 | 0.304606 | 0.618535 | 0.579897 | Ankle1/Ccc  |
| GO_CC_mGO:004444contractile 6/540  | 199/23583 | 0.305539 | 0.618535 | 0.579897 | Rpl6l/Mybph |
| GO_CC_mGO:003066secretory g3/540   | 85/23583  | 0.308577 | 0.618535 | 0.579897 | Cd46/Fam1   |
| GO_CC_mGO:000191photorecep2/540    | 49/23583  | 0.309558 | 0.618535 | 0.579897 | Sag/Whrn    |
| GO_CC_mGO:000563integral coi1/540  | 16/23583  | 0.30978  | 0.618535 | 0.579897 | Ankle1      |
| GO_CC_mGO:000585muscle my1/540     | 16/23583  | 0.30978  | 0.618535 | 0.579897 | Mybph       |
| GO_CC_mGO:003122intrinsic coi1/540 | 16/23583  | 0.30978  | 0.618535 | 0.579897 | Ankle1      |
| GO_CC_mGO:00382C TOR compl1/540    | 16/23583  | 0.30978  | 0.618535 | 0.579897 | Prr5        |
| GO_CC_mGO:004319varicosity 1/540   | 16/23583  | 0.30978  | 0.618535 | 0.579897 | Ucn         |
| GO_CC_mGO:009703perinuclear1/540   | 16/23583  | 0.30978  | 0.618535 | 0.579897 | Syt6        |
| GO_CC_mGO:000579Golgi-asso4/540    | 123/23583 | 0.311112 | 0.618535 | 0.579897 | Ap1g2/Ier3  |
| GO_CC_mGO:000588intermedia4/540    | 123/23583 | 0.311112 | 0.618535 | 0.579897 | Fam83h/Kr   |
| GO_CC_mGO:004511intermedia5/540    | 163/23583 | 0.318223 | 0.621995 | 0.583141 | Fam83h/Kr   |
| GO_CC_mGO:003067synaptic ve3/540   | 87/23583  | 0.321136 | 0.621995 | 0.583141 | Bcl2l1/Stx1 |
| GO_CC_mGO:00995C exocytic ve3/540  | 87/23583  | 0.321136 | 0.621995 | 0.583141 | Bcl2l1/Stx1 |
| GO_CC_mGO:000577integral coi1/540  | 17/23583  | 0.325595 | 0.621995 | 0.583141 | Slc25a17    |
| GO_CC_mGO:001601dystrophin 1/540   | 17/23583  | 0.325595 | 0.621995 | 0.583141 | Dtna        |
| GO_CC_mGO:003243filopodium 1/540   | 17/23583  | 0.325595 | 0.621995 | 0.583141 | Nlgn1       |
| GO_CC_mGO:003298myosin fila1/540   | 17/23583  | 0.325595 | 0.621995 | 0.583141 | Mybph       |
| GO_CC_mGO:004445nuclear me1/540    | 17/23583  | 0.325595 | 0.621995 | 0.583141 | Ankle1      |
| GO_CC_mGO:009066glycoprote 1/540   | 17/23583  | 0.325595 | 0.621995 | 0.583141 | Dtna        |
| GO_CC_mGO:009864complex of1/540    | 17/23583  | 0.325595 | 0.621995 | 0.583141 | Col27a1     |
| GO_CC_mGO:003012vesicle coa2/540   | 51/23583  | 0.326455 | 0.621995 | 0.583141 | Ap1g2/Slc1  |
| GO_CC_mGO:003215cell divisior2/540 | 52/23583  | 0.334863 | 0.628379 | 0.589126 | Nf2/Rhob    |
| GO_CC_mGO:000189phagocytic1/540    | 18/23583  | 0.341049 | 0.628379 | 0.589126 | Arhgap25    |
| GO_CC_mGO:001658NuRD com1/540      | 18/23583  | 0.341049 | 0.628379 | 0.589126 | Chd3        |
| GO_CC_mGO:003013clathrin coi1/540  | 18/23583  | 0.341049 | 0.628379 | 0.589126 | Slc18a3     |
| GO_CC_mGO:003104dense core1/540    | 18/23583  | 0.341049 | 0.628379 | 0.589126 | Syt4        |
| GO_CC_mGO:003123intrinsic coi1/540 | 18/23583  | 0.341049 | 0.628379 | 0.589126 | Slc25a17    |
| GO_CC_mGO:003509ESC/E(Z) cc1/540   | 18/23583  | 0.341049 | 0.628379 | 0.589126 | Epop        |
| GO_CC_mGO:004429dendrite te1/540   | 18/23583  | 0.341049 | 0.628379 | 0.589126 | Ptch1       |
| GO_CC_mGO:009054CHD-type 1/540     | 18/23583  | 0.341049 | 0.628379 | 0.589126 | Chd3        |
| GO_CC_mGO:000574mitochond 5/540    | 169/23583 | 0.345318 | 0.633923 | 0.594323 | Ankzf1/Bcl  |
| GO_CC_mGO:003013transport v8/540   | 291/23583 | 0.350329 | 0.640783 | 0.600755 | Ap1g2/Bcl   |
| GO_CC_mGO:000014exocyst 1/540      | 19/23583  | 0.356149 | 0.642858 | 0.6027   | Exoc1       |

|                                     |           |          |          |          |              |
|-------------------------------------|-----------|----------|----------|----------|--------------|
| GO_CC_mGO:00320integrator c1/540    | 19/23583  | 0.356149 | 0.642858 | 0.6027   | Ints2        |
| GO_CC_mGO:00324stereociliur 1/540   | 19/23583  | 0.356149 | 0.642858 | 0.6027   | Whrn         |
| GO_CC_mGO:00987Golgi subc11/540     | 416/23583 | 0.356575 | 0.642858 | 0.6027   | Ap1g2/Ap3    |
| GO_CC_mGO:00347Cpotassium 3/540     | 93/23583  | 0.358781 | 0.644211 | 0.603969 | Grik2/Grik4  |
| GO_CC_mGO:00347Ccalcium ch2/540     | 55/23583  | 0.359888 | 0.644211 | 0.603969 | Catsper4/C   |
| GO_CC_mGO:00703Exocytic ve6/540     | 213/23583 | 0.362133 | 0.645933 | 0.605583 | Bcl2l1/Lrrk1 |
| GO_CC_mGO:00198Extrinsic co8/540    | 296/23583 | 0.367586 | 0.65005  | 0.609443 | Cdh26/Dtna   |
| GO_CC_mGO:00302Eintegral coi1/540   | 20/23583  | 0.370903 | 0.65005  | 0.609443 | Stx12        |
| GO_CC_mGO:00310EBLOC com1/540       | 20/23583  | 0.370903 | 0.65005  | 0.609443 | Stx12        |
| GO_CC_mGO:00313Eanchored c1/540     | 20/23583  | 0.370903 | 0.65005  | 0.609443 | Prn          |
| GO_CC_mGO:00973Eglial cell pr1/540  | 20/23583  | 0.370903 | 0.65005  | 0.609443 | Syt4         |
| GO_CC_mGO:00324stereociliur 2/540   | 58/23583  | 0.384557 | 0.668332 | 0.626583 | Mkks/Whrn    |
| GO_CC_mGO:00056Eanaphase-1/540      | 21/23583  | 0.385321 | 0.668332 | 0.626583 | Ube2c        |
| GO_CC_mGO:00056Etelomerase 1/540    | 21/23583  | 0.385321 | 0.668332 | 0.626583 | Gnl3l        |
| GO_CC_mGO:00306Eendocytic v1/540    | 22/23583  | 0.399408 | 0.686874 | 0.643967 | Slc18a3      |
| GO_CC_mGO:00309Eintraciliary 1/540  | 22/23583  | 0.399408 | 0.686874 | 0.643967 | Ttc30a1      |
| GO_CC_mGO:00306EGolgi-asso 2/540    | 60/23583  | 0.400773 | 0.686874 | 0.643967 | Ap1g2/Slc1   |
| GO_CC_mGO:00156Eactin cytosl12/540  | 474/23583 | 0.402838 | 0.686874 | 0.643967 | Ablim3/Fln   |
| GO_CC_mGO:00444EGolgi appa 12/540   | 474/23583 | 0.402838 | 0.686874 | 0.643967 | Ap1g2/Ap3    |
| GO_CC_mGO:000011histone de2/540     | 61/23583  | 0.408805 | 0.694692 | 0.651297 | Chd3/Dntt1   |
| GO_CC_mGO:00312Eintrinsic coi1/540  | 23/23583  | 0.413173 | 0.699751 | 0.656039 | Prn          |
| GO_CC_mGO:00444Eciliary part 11/540 | 437/23583 | 0.417737 | 0.702981 | 0.659068 | Catsper4/C   |
| GO_CC_mGO:00300Isarcomere 5/540     | 185/23583 | 0.417876 | 0.702981 | 0.659068 | Rpl6l/Mybp   |
| GO_CC_mGO:00164Emyosin II c1/540    | 24/23583  | 0.426623 | 0.708223 | 0.663982 | Mybph        |
| GO_CC_mGO:00300E desmosom 1/540     | 24/23583  | 0.426623 | 0.708223 | 0.663982 | Dsg1a        |
| GO_CC_mGO:00314EM band 1/540        | 24/23583  | 0.426623 | 0.708223 | 0.663982 | Mybph        |
| GO_CC_mGO:00325Etrans-Golg 1/540    | 24/23583  | 0.426623 | 0.708223 | 0.663982 | Pld4         |
| GO_CC_mGO:00001EGolgi mem6/540      | 232/23583 | 0.439542 | 0.722883 | 0.677726 | Cux2/Ier3ip  |
| GO_CC_mGO:00353Etranscriptic 1/540  | 25/23583  | 0.439766 | 0.722883 | 0.677726 | Ctr9         |
| GO_CC_mGO:00453Eclathrin-co 1/540   | 25/23583  | 0.439766 | 0.722883 | 0.677726 | Slc18a3      |
| GO_CC_mGO:00616Etransferase 7/540   | 275/23583 | 0.442077 | 0.724315 | 0.679069 | Ctdp1/Ctr9   |
| GO_CC_mGO:00447Enuclear tra15/540   | 191/23583 | 0.444832 | 0.726463 | 0.681083 | Gtf2e1/Ho    |
| GO_CC_mGO:00304Egrowth cor 5/540    | 192/23583 | 0.449297 | 0.73138  | 0.685692 | Hnrnpr/Lrrl  |
| GO_CC_mGO:00972Esperm mid1/540      | 26/23583  | 0.452608 | 0.734392 | 0.688517 | Tacr1        |
| GO_CC_mGO:00080Esynaptic ve5/540    | 195/23583 | 0.462634 | 0.745756 | 0.699171 | Bcl2l1/Lrrk1 |
| GO_CC_mGO:00058Ecytoplasmic 1/540   | 27/23583  | 0.465155 | 0.745756 | 0.699171 | BC048507     |
| GO_CC_mGO:00423E sarcolemm 4/540    | 154/23583 | 0.470692 | 0.745756 | 0.699171 | Cln1/Dtna    |
| GO_CC_mGO:00057Emitochond 2/540     | 69/23583  | 0.471023 | 0.745756 | 0.699171 | Pdia3/Preli  |
| GO_CC_mGO:00306Ecoated ves 2/540    | 69/23583  | 0.471023 | 0.745756 | 0.699171 | Ap1g2/Slc1   |
| GO_CC_mGO:00315Ebrush bord2/540     | 69/23583  | 0.471023 | 0.745756 | 0.699171 | Slc19a1/Slc  |
| GO_CC_mGO:00321Ecell divisior 2/540 | 69/23583  | 0.471023 | 0.745756 | 0.699171 | Nf2/Rhob     |
| GO_CC_mGO:00304Esite of pola5/540   | 197/23583 | 0.471472 | 0.745756 | 0.699171 | Hnrnpr/Lrrl  |
| GO_CC_mGO:00058Ecytoplasmic 2/540   | 70/23583  | 0.478524 | 0.752179 | 0.705193 | Ckap2/Mtu    |
| GO_CC_mGO:00190ESCF ubiqui 2/540    | 70/23583  | 0.478524 | 0.752179 | 0.705193 | Ccnf/Tdpo    |
| GO_CC_mGO:001634catenin cor 1/540   | 29/23583  | 0.489397 | 0.75917  | 0.711746 | Cdh26        |
| GO_CC_mGO:00985Eintrinsic coi1/540  | 29/23583  | 0.489397 | 0.75917  | 0.711746 | Stx12        |
| GO_CC_mGO:19025E endoribont 1/540   | 29/23583  | 0.489397 | 0.75917  | 0.711746 | Mir28a       |
| GO_CC_mGO:190534endonuclei 1/540    | 29/23583  | 0.489397 | 0.75917  | 0.711746 | Mir28a       |

|                                                         |           |          |          |          |             |
|---------------------------------------------------------|-----------|----------|----------|----------|-------------|
| GO_CC_mεGO:009057RNA polymerase 4/540                   | 158/23583 | 0.490517 | 0.75917  | 0.711746 | Gtf2e1/Ho   |
| GO_CC_mεGO:00358εciliary transition 2/540               | 72/23583  | 0.493327 | 0.761177 | 0.713628 | Cep131/W    |
| GO_CC_mεGO:00301εendocytic vesicle 4/540                | 160/23583 | 0.500314 | 0.766124 | 0.718266 | Fmn11/Pld4  |
| GO_CC_mεGO:00166εPML body 2/540                         | 73/23583  | 0.500629 | 0.766124 | 0.718266 | Isg20/Satb  |
| GO_CC_mεGO:00427εpolysomal 1/540                        | 30/23583  | 0.501103 | 0.766124 | 0.718266 | Rpl6l       |
| GO_CC_mεGO:00198εorganelle in 11/540                    | 468/23583 | 0.507701 | 0.771767 | 0.723557 | Ankle1/Bcl  |
| GO_CC_mεGO:00165εsarcolemma 2/540                       | 74/23583  | 0.507863 | 0.771767 | 0.723557 | Flnc/Rasd1  |
| GO_CC_mεGO:00004εphagophor 1/540                        | 31/23583  | 0.512541 | 0.774198 | 0.725836 | Stx12       |
| GO_CC_mεGO:00512εspindle microtubule 1/540              | 31/23583  | 0.512541 | 0.774198 | 0.725836 | Ctdp1       |
| GO_CC_mεGO:00059εbicellular tight junction 3/540        | 119/23583 | 0.514923 | 0.775468 | 0.727026 | Crb3/Prkc   |
| GO_CC_mεGO:00009εspindle pole body 3/540                | 120/23583 | 0.520546 | 0.781595 | 0.732771 | Ccdc155/C   |
| GO_CC_mεGO:00162εinclusion body 2/540                   | 76/23583  | 0.522123 | 0.781631 | 0.732804 | Bag5/Lrrk2  |
| GO_CC_mεGO:00905εnuclear translocator 1/540             | 32/23583  | 0.523717 | 0.781691 | 0.732861 | Chd3        |
| GO_CC_mεGO:00058εactin filament 3/540                   | 121/23583 | 0.526133 | 0.782973 | 0.734062 | Hck/Prkc    |
| GO_CC_mεGO:00058εpolysome 2/540                         | 77/23583  | 0.529149 | 0.784032 | 0.735055 | Atxn2/Rpl6  |
| GO_CC_mεGO:00701εoccluding junction 3/540               | 122/23583 | 0.531684 | 0.784032 | 0.735055 | Crb3/Prkc   |
| GO_CC_mεGO:00140εpostsynaptic membrane 6/540            | 256/23583 | 0.534284 | 0.784032 | 0.735055 | Grik2/Grik4 |
| GO_CC_mεGO:00059εgap junction 1/540                     | 33/23583  | 0.534638 | 0.784032 | 0.735055 | Calb2       |
| GO_CC_mεGO:00306ε90S preribosome 1/540                  | 33/23583  | 0.534638 | 0.784032 | 0.735055 | Nol10       |
| GO_CC_mεGO:00432εmyelin sheath 5/540                    | 213/23583 | 0.54024  | 0.788191 | 0.738954 | Dlat/Dld/P  |
| GO_CC_mεGO:00995εpostsynaptic membrane 6/540            | 258/23583 | 0.541893 | 0.788191 | 0.738954 | Grik2/Grik4 |
| GO_CC_mεGO:00312εanchored cell-cell junction 4/540      | 169/23583 | 0.543328 | 0.788191 | 0.738954 | Mdga1/Ple   |
| GO_CC_mεGO:00057εsmooth endoplasmic reticulum 1/540     | 34/23583  | 0.545309 | 0.788191 | 0.738954 | Pdia3       |
| GO_CC_mεGO:00309εintraciliary 1/540                     | 34/23583  | 0.545309 | 0.788191 | 0.738954 | Ttc30a1     |
| GO_CC_mεGO:00322εasymmetric cell division 6/540         | 260/23583 | 0.549448 | 0.78853  | 0.739273 | Grik2/Grik4 |
| GO_CC_mεGO:19025εserine/threonine phosphorylation 2/540 | 80/23583  | 0.549801 | 0.78853  | 0.739273 | Map3k13/F   |
| GO_CC_mεGO:00017εimmunology 1/540                       | 35/23583  | 0.555735 | 0.78853  | 0.739273 | Carmil2     |
| GO_CC_mεGO:00057εmultivesicular body 1/540              | 35/23583  | 0.555735 | 0.78853  | 0.739273 | Lrrk2       |
| GO_CC_mεGO:00710εpre-catalytic 1/540                    | 35/23583  | 0.555735 | 0.78853  | 0.739273 | Smu1        |
| GO_CC_mεGO:00800εCul4-RING ubiquitin ligase 1/540       | 35/23583  | 0.555735 | 0.78853  | 0.739273 | Dcaf1212    |
| GO_CC_mεGO:00989εneuron to muscle junction 6/540        | 263/23583 | 0.560674 | 0.78853  | 0.739273 | Grik2/Grik4 |
| GO_CC_mεGO:00319εorganelle in 2/540                     | 82/23583  | 0.563211 | 0.78853  | 0.739273 | Pdia3/Preli |
| GO_CC_mεGO:00360εciliary base 3/540                     | 128/23583 | 0.564203 | 0.78853  | 0.739273 | Cetn4/Mkk   |
| GO_CC_mεGO:00056εtranscription 9/540                    | 399/23583 | 0.565114 | 0.78853  | 0.739273 | Atf5/Gtf2e: |
| GO_CC_mεGO:00165εmediator complex 1/540                 | 36/23583  | 0.565923 | 0.78853  | 0.739273 | Med30       |
| GO_CC_mεGO:00320εsmall-subunit 1/540                    | 36/23583  | 0.565923 | 0.78853  | 0.739273 | Nol10       |
| GO_CC_mεGO:00550εrecycling endosome 1/540               | 36/23583  | 0.565923 | 0.78853  | 0.739273 | Pigr        |
| GO_CC_mεGO:00056εtranscription 1/540                    | 37/23583  | 0.575878 | 0.800184 | 0.750198 | Gtf2e1      |
| GO_CC_mεGO:00304εmidbody 3/540                          | 132/23583 | 0.585102 | 0.809228 | 0.758678 | Ctdp1/Lap:  |
| GO_CC_mεGO:00007εeuchromatin 1/540                      | 38/23583  | 0.585604 | 0.809228 | 0.758678 | Uhrf1       |
| GO_CC_mεGO:00313εextrinsic co 1/540                     | 39/23583  | 0.595109 | 0.816135 | 0.765153 | Sox10       |
| GO_CC_mεGO:00442εaxonal growth 1/540                    | 39/23583  | 0.595109 | 0.816135 | 0.765153 | Ptch1       |
| GO_CC_mεGO:00301εfilopodium 2/540                       | 87/23583  | 0.59547  | 0.816135 | 0.765153 | Nf2/Nlgn1   |
| GO_CC_mεGO:00988εcluster of actin 4/540                 | 182/23583 | 0.601901 | 0.816331 | 0.765337 | Mkks/Slc1ε  |
| GO_CC_mεGO:00001εnuclear ubiquitin 1/540                | 40/23583  | 0.604395 | 0.816331 | 0.765337 | Ube2c       |
| GO_CC_mεGO:00435εnuclear receptor 1/540                 | 40/23583  | 0.604395 | 0.816331 | 0.765337 | Mms22l      |
| GO_CC_mεGO:00487εpresynaptic 1/540                      | 40/23583  | 0.604395 | 0.816331 | 0.765337 | Grm4        |
| GO_CC_mεGO:00997εcell cortex 1/540                      | 40/23583  | 0.604395 | 0.816331 | 0.765337 | Prkc        |

|                                      |           |          |          |          |             |
|--------------------------------------|-----------|----------|----------|----------|-------------|
| GO_CC_mGO:004329 apical junct3/540   | 136/23583 | 0.605351 | 0.816331 | 0.765337 | Crb3/Prkcz  |
| GO_CC_mGO:000577 peroxisom1/540      | 42/23583  | 0.622335 | 0.833675 | 0.781598 | Slc25a17    |
| GO_CC_mGO:003190 microbody 1/540     | 42/23583  | 0.622335 | 0.833675 | 0.781598 | Slc25a17    |
| GO_CC_mGO:004443 vacuolar p1/540     | 187/23583 | 0.623185 | 0.833675 | 0.781598 | Cyb561a3/   |
| GO_CC_mGO:004257 immunoglc3/540      | 141/23583 | 0.629726 | 0.835899 | 0.783683 | Ighv1-53/I  |
| GO_CC_mGO:000992 basal plas1/540     | 43/23583  | 0.630998 | 0.835899 | 0.783683 | Aqp5        |
| GO_CC_mGO:003190 early endo1/540     | 43/23583  | 0.630998 | 0.835899 | 0.783683 | Syndig1     |
| GO_CC_mGO:000077 chromosor4/540      | 189/23583 | 0.631494 | 0.835899 | 0.783683 | Fbxo28/Kd   |
| GO_CC_mGO:002262 cytosolic la2/540   | 94/23583  | 0.637582 | 0.836136 | 0.783905 | Rpl6l/Rpl39 |
| GO_CC_mGO:000079 condensed5/540      | 238/23583 | 0.638399 | 0.836136 | 0.783905 | Ccdc155/Ei  |
| GO_CC_mGO:009773 non-motile3/540     | 143/23583 | 0.63918  | 0.836136 | 0.783905 | Mkks/Sag/   |
| GO_CC_mGO:003239 photorecep1/540     | 44/23583  | 0.639463 | 0.836136 | 0.783905 | Whrn        |
| GO_CC_mGO:003013 clathrin-co2/540    | 95/23583  | 0.643309 | 0.836136 | 0.783905 | Ap1g2/Slc1  |
| GO_CC_mGO:007268 mitotic spir2/540   | 95/23583  | 0.643309 | 0.836136 | 0.783905 | Atat1/Mad   |
| GO_CC_mGO:190356 extracellula2/540   | 95/23583  | 0.643309 | 0.836136 | 0.783905 | Mir106b/Sy  |
| GO_CC_mGO:000591 cell-cell jur10/540 | 473/23583 | 0.645282 | 0.836352 | 0.784108 | Calb2/Cdh1  |
| GO_CC_mGO:003470 chloride ch1/540    | 45/23583  | 0.647734 | 0.836352 | 0.784108 | Clcn1       |
| GO_CC_mGO:001981 immunoglc3/540      | 145/23583 | 0.648464 | 0.836352 | 0.784108 | Ighv1-53/I  |
| GO_CC_mGO:003190 late endosc1/540    | 46/23583  | 0.655815 | 0.841518 | 0.788951 | Cyb561a3    |
| GO_CC_mGO:003194 filamentou1/540     | 46/23583  | 0.655815 | 0.841518 | 0.788951 | Prkcz       |
| GO_CC_mGO:009868 chromosor6/540      | 293/23583 | 0.664814 | 0.85065  | 0.797512 | Ccdc155/Ei  |
| GO_CC_mGO:001593 large ribos3/540    | 149/23583 | 0.666519 | 0.85065  | 0.797512 | Rpl6l/Mrpl  |
| GO_CC_mGO:004444 cytosolic p1/540    | 294/23583 | 0.668006 | 0.85065  | 0.797512 | Rpl6l/Map3  |
| GO_CC_mGO:003146 cullin-RIN4/540     | 199/23583 | 0.671247 | 0.8507   | 0.79756  | Ccnf/Dcaf1  |
| GO_CC_mGO:003242 stereociliur1/540   | 48/23583  | 0.671428 | 0.8507   | 0.79756  | Whrn        |
| GO_CC_mGO:003151 PcG proteir1/540    | 49/23583  | 0.678967 | 0.858091 | 0.804488 | Epop        |
| GO_CC_mGO:003013 COPII-coat1/540     | 50/23583  | 0.686333 | 0.865227 | 0.811178 | Ier3ip1     |
| GO_CC_mGO:000989 external sic10/540  | 491/23583 | 0.690392 | 0.865622 | 0.811549 | Adam24/Bi   |
| GO_CC_mGO:000080 lateral elen2/540   | 104/23583 | 0.691666 | 0.865622 | 0.811549 | Ccdc155/X   |
| GO_CC_mGO:001660 nuclear spe6/540    | 302/23583 | 0.692837 | 0.865622 | 0.811549 | Ddx46/Gpa   |
| GO_CC_mGO:003120 SNARE con1/540      | 51/23583  | 0.69353  | 0.865622 | 0.811549 | Stx12       |
| GO_CC_mGO:007256 blood micr3/540     | 156/23583 | 0.696468 | 0.867137 | 0.81297  | Ighv1-53/I  |
| GO_CC_mGO:002262 cytosolic ril3/540  | 157/23583 | 0.700576 | 0.869284 | 0.814983 | Rpl6l/Rpl39 |
| GO_CC_mGO:000078 chromosor2/540      | 106/23583 | 0.701649 | 0.869284 | 0.814983 | Ccdc155/Ei  |
| GO_CC_mGO:004323 extracellula2/540   | 107/23583 | 0.706539 | 0.869436 | 0.815124 | Mir106b/Sy  |
| GO_CC_mGO:009773 photorecep2/540     | 107/23583 | 0.706539 | 0.869436 | 0.815124 | Sag/Whrn    |
| GO_CC_mGO:004217 nuclear out10/540   | 498/23583 | 0.706957 | 0.869436 | 0.815124 | Ccdc155/Ei  |
| GO_CC_mGO:003002 lamellipodi3/540    | 160/23583 | 0.712646 | 0.871886 | 0.817421 | Ablim3/Nf2  |
| GO_CC_mGO:000031 organellar 1/540    | 54/23583  | 0.714149 | 0.871886 | 0.817421 | Mrpl41      |
| GO_CC_mGO:000576 mitochond1/540      | 54/23583  | 0.714149 | 0.871886 | 0.817421 | Mrpl41      |
| GO_CC_mGO:190291 protein kin2/540    | 109/23583 | 0.716119 | 0.872174 | 0.817691 | Map3k13/F   |
| GO_CC_mGO:004445 mitochond4/540      | 214/23583 | 0.725146 | 0.880409 | 0.825412 | Ankzf1/Fdx  |
| GO_CC_mGO:002262 cytosolic sr1/540   | 56/23583  | 0.727119 | 0.880409 | 0.825412 | Rps3a1      |
| GO_CC_mGO:009773 9+0 non-n2/540      | 112/23583 | 0.729995 | 0.880409 | 0.825412 | Sag/Whrn    |
| GO_CC_mGO:003028 dynein con1/540     | 57/23583  | 0.733383 | 0.880409 | 0.825412 | BC048507    |
| GO_CC_mGO:004443 microbody 1/540     | 57/23583  | 0.733383 | 0.880409 | 0.825412 | Slc25a17    |
| GO_CC_mGO:004443 peroxisom1/540      | 57/23583  | 0.733383 | 0.880409 | 0.825412 | Slc25a17    |
| GO_CC_mGO:001632 lateral plas1/540   | 58/23583  | 0.739502 | 0.885642 | 0.830319 | Dsg1a       |

|                                     |           |          |          |          |              |
|-------------------------------------|-----------|----------|----------|----------|--------------|
| GO_CC_mεGO:00301εcoated ves 3/540   | 169/23583 | 0.746604 | 0.892023 | 0.836301 | Ap1g2/lerε   |
| GO_CC_mεGO:00057εlysosomal r2/540   | 118/23583 | 0.756024 | 0.898696 | 0.842557 | Cyb561a3/    |
| GO_CC_mεGO:00988εlytic vacuol2/540  | 118/23583 | 0.756024 | 0.898696 | 0.842557 | Cyb561a3/    |
| GO_CC_mεGO:000584ribosome 5/540     | 275/23583 | 0.757549 | 0.898696 | 0.842557 | Rpl6l/Mrplε  |
| GO_CC_mεGO:000574mitochond 8/540    | 426/23583 | 0.762354 | 0.902268 | 0.845906 | Bcl2l1/Bcs1  |
| GO_CC_mεGO:00443εribosomal ε4/540   | 231/23583 | 0.777962 | 0.908365 | 0.851622 | Rpl6l/Mrplε  |
| GO_CC_mεGO:00056εU2-type sp 1/540   | 65/23583  | 0.778589 | 0.908365 | 0.851622 | Gcfc2        |
| GO_CC_mεGO:00164εmyosin cor 1/540   | 65/23583  | 0.778589 | 0.908365 | 0.851622 | Mybph        |
| GO_CC_mεGO:00165εsarcoplasm 1/540   | 65/23583  | 0.778589 | 0.908365 | 0.851622 | Rasd1        |
| GO_CC_mεGO:00990εtethering c 1/540  | 65/23583  | 0.778589 | 0.908365 | 0.851622 | Exoc1        |
| GO_CC_mεGO:000577late endosc3/540   | 180/23583 | 0.783669 | 0.908365 | 0.851622 | Cyb561a3/    |
| GO_CC_mεGO:004517basal part ε1/540  | 66/23583  | 0.783673 | 0.908365 | 0.851622 | Aqp5         |
| GO_CC_mεGO:004444cell cortex  3/540 | 181/23583 | 0.786805 | 0.908365 | 0.851622 | Exoc1/Nf2/   |
| GO_CC_mεGO:00444εnucleolar p3/540   | 181/23583 | 0.786805 | 0.908365 | 0.851622 | Ddx46/lppl   |
| GO_CC_mεGO:00550εrecycling e 2/540  | 126/23583 | 0.787338 | 0.908365 | 0.851622 | Pigr/Stx12   |
| GO_CC_mεGO:00007εsynaptoner2/540    | 127/23583 | 0.790994 | 0.908365 | 0.851622 | Ccdc155/X    |
| GO_CC_mεGO:00990εsynaptoner2/540    | 127/23583 | 0.790994 | 0.908365 | 0.851622 | Ccdc155/X    |
| GO_CC_mεGO:00007εnuclear chr 7/540  | 390/23583 | 0.79221  | 0.908365 | 0.851622 | Chd3/Hypr    |
| GO_CC_mεGO:00001εubiquitin liε6/540 | 340/23583 | 0.793479 | 0.908365 | 0.851622 | Ccnf/Dcaf1   |
| GO_CC_mεGO:00016εfibrillar cen2/540 | 128/23583 | 0.794593 | 0.908365 | 0.851622 | Ddx46/Kdn    |
| GO_CC_mεGO:00007εcondensed3/540     | 185/23583 | 0.798978 | 0.911305 | 0.854379 | Ccdc155/C    |
| GO_CC_mεGO:000077kinetochori2/540   | 130/23583 | 0.801629 | 0.91161  | 0.854665 | Fbxo28/Mε    |
| GO_CC_mεGO:000577autophago 1/540    | 70/23583  | 0.80287  | 0.91161  | 0.854665 | Lrrk2        |
| GO_CC_mεGO:00059Cbrush bord2/540    | 131/23583 | 0.805066 | 0.912046 | 0.855073 | Slc19a1/Slc  |
| GO_CC_mεGO:00315εneuromusc 1/540    | 71/23583  | 0.807397 | 0.912631 | 0.855621 | Syngr1       |
| GO_CC_mεGO:00706C SWI/SNF st 1/540  | 72/23583  | 0.81182  | 0.915573 | 0.85838  | Chd3         |
| GO_CC_mεGO:000172stress fiber 1/540 | 74/23583  | 0.820366 | 0.92108  | 0.863543 | Ablim3       |
| GO_CC_mεGO:009751contractile 1/540  | 74/23583  | 0.820366 | 0.92108  | 0.863543 | Ablim3       |
| GO_CC_mεGO:00350εhistone me 1/540   | 75/23583  | 0.824492 | 0.923651 | 0.865953 | Epop         |
| GO_CC_mεGO:00017εphotoreceε1/540    | 76/23583  | 0.828523 | 0.926105 | 0.868254 | Sag          |
| GO_CC_mεGO:000172ruffle 2/540       | 139/23583 | 0.830706 | 0.926486 | 0.868611 | Nf2/Carmil   |
| GO_CC_mεGO:00056εspliceosom3/540    | 199/23583 | 0.837079 | 0.928075 | 0.870101 | Gcfc2/Hnrr   |
| GO_CC_mεGO:000581spindle 4/540      | 255/23583 | 0.838478 | 0.928075 | 0.870101 | Atat1/Ccdc   |
| GO_CC_mεGO:000577peroxisomε2/540    | 142/23583 | 0.839511 | 0.928075 | 0.870101 | Ccdc33/Slc   |
| GO_CC_mεGO:004257microbody 2/540    | 142/23583 | 0.839511 | 0.928075 | 0.870101 | Ccdc33/Slc   |
| GO_CC_mεGO:00308εcortical act 1/540 | 81/23583  | 0.847336 | 0.932039 | 0.873817 | Nf2          |
| GO_CC_mεGO:00443C main axon 1/540   | 81/23583  | 0.847336 | 0.932039 | 0.873817 | Ucn          |
| GO_CC_mεGO:00055εcollagen tri1/540  | 82/23583  | 0.850844 | 0.932039 | 0.873817 | Col27a1      |
| GO_CC_mεGO:00324εactin filamε1/540  | 83/23583  | 0.854271 | 0.932039 | 0.873817 | Ablim3       |
| GO_CC_mεGO:00057εendoplasm8/540     | 476/23583 | 0.85584  | 0.932039 | 0.873817 | Elovl2/ler3i |
| GO_CC_mεGO:000807voltage-ga 1/540   | 84/23583  | 0.85762  | 0.932039 | 0.873817 | Kcnmb4       |
| GO_CC_mεGO:00170εtranscriptic 1/540 | 84/23583  | 0.85762  | 0.932039 | 0.873817 | Chd3         |
| GO_CC_mεGO:00159εsmall ribos 1/540  | 85/23583  | 0.860892 | 0.932039 | 0.873817 | Rps3a1       |
| GO_CC_mεGO:004264actomyosir 1/540   | 85/23583  | 0.860892 | 0.932039 | 0.873817 | Ablim3       |
| GO_CC_mεGO:00007εnucleosom 1/540    | 86/23583  | 0.864089 | 0.932039 | 0.873817 | Hypm         |
| GO_CC_mεGO:190494ATPase cor 1/540   | 86/23583  | 0.864089 | 0.932039 | 0.873817 | Chd3         |
| GO_CC_mεGO:000031organellar 1/540   | 89/23583  | 0.873246 | 0.932039 | 0.873817 | Mrpl41       |
| GO_CC_mεGO:00057εmitochond 1/540    | 89/23583  | 0.873246 | 0.932039 | 0.873817 | Mrpl41       |

|                                      |           |          |          |          |              |
|--------------------------------------|-----------|----------|----------|----------|--------------|
| GO_CC_mεGO:003124protein acε1/540    | 89/23583  | 0.873246 | 0.932039 | 0.873817 | Naa25        |
| GO_CC_mεGO:00700εextracellula1/540   | 89/23583  | 0.873246 | 0.932039 | 0.873817 | Mir106b      |
| GO_CC_mεGO:19024εacetyltrans1/540    | 89/23583  | 0.873246 | 0.932039 | 0.873817 | Naa25        |
| GO_CC_mεGO:009882endoplasm8/540      | 489/23583 | 0.874597 | 0.932039 | 0.873817 | Elovl2/Ier3i |
| GO_CC_mεGO:00347Cmethyltran1/540     | 94/23583  | 0.887159 | 0.940692 | 0.88193  | Epop         |
| GO_CC_mεGO:004481DNA packε1/540      | 94/23583  | 0.887159 | 0.940692 | 0.88193  | Hypm         |
| GO_CC_mεGO:00328εplasma me2/540      | 162/23583 | 0.888327 | 0.940692 | 0.88193  | Grik2/Lrrk2  |
| GO_CC_mεGO:00059εcell cortex4/540    | 290/23583 | 0.901534 | 0.952672 | 0.893161 | Exoc1/Nf2/   |
| GO_CC_mεGO:007101catalytic str1/540  | 103/23583 | 0.908474 | 0.957993 | 0.89815  | Hnrnpr       |
| GO_CC_mεGO:00057εearly endo3/540     | 239/23583 | 0.913516 | 0.95819  | 0.898334 | Nf2/Rhob/    |
| GO_CC_mεGO:000577vacuolar m2/540     | 177/23583 | 0.915485 | 0.95819  | 0.898334 | Cyb561a3/    |
| GO_CC_mεGO:00329εprotein-D12/540     | 179/23583 | 0.918599 | 0.95819  | 0.898334 | Gtf2e1/Hyp   |
| GO_CC_mεGO:00431εdendritic str2/540  | 179/23583 | 0.918599 | 0.95819  | 0.898334 | Nlgn1/Sync   |
| GO_CC_mεGO:00701εanchoring4/540      | 303/23583 | 0.918739 | 0.95819  | 0.898334 | Cdh26/Dsc    |
| GO_CC_mεGO:00443Cneuron spii2/540    | 181/23583 | 0.921604 | 0.95819  | 0.898334 | Nlgn1/Sync   |
| GO_CC_mεGO:00312Ecell leading5/540   | 364/23583 | 0.921996 | 0.95819  | 0.898334 | Ablim3/Nf2   |
| GO_CC_mεGO:00057Emitochond3/540      | 253/23583 | 0.931389 | 0.965956 | 0.905616 | Dlat/Lrrk2/  |
| GO_CC_mεGO:00308εcortical cyt1/540   | 117/23583 | 0.933925 | 0.966593 | 0.906213 | Nf2          |
| GO_CC_mεGO:00987εmitochond3/540      | 262/23583 | 0.941016 | 0.967694 | 0.907245 | Ankzf1/Dla   |
| GO_CC_mεGO:000591cell-cell ad1/540   | 122/23583 | 0.941186 | 0.967694 | 0.907245 | Cdh26        |
| GO_CC_mεGO:003001Z disc1/540         | 122/23583 | 0.941186 | 0.967694 | 0.907245 | Mybph        |
| GO_CC_mεGO:00995εcytoplasmic6/540    | 444/23583 | 0.942684 | 0.967694 | 0.907245 | Exoc1/Grik   |
| GO_CC_mεGO:004442extracellula1/540   | 129/23583 | 0.950033 | 0.973252 | 0.912456 | Col27a1      |
| GO_CC_mεGO:000592focal adheε1/540    | 135/23583 | 0.956551 | 0.9758   | 0.914844 | Hck          |
| GO_CC_mεGO:003167I band1/540         | 135/23583 | 0.956551 | 0.9758   | 0.914844 | Mybph        |
| GO_CC_mεGO:000587microtubul5/540     | 412/23583 | 0.960887 | 0.9758   | 0.914844 | Appbp2/At    |
| GO_CC_mεGO:000591adherens jt3/540    | 287/23583 | 0.961583 | 0.9758   | 0.914844 | Cdh26/Hck    |
| GO_CC_mεGO:000592cell-substr1/540    | 141/23583 | 0.96222  | 0.9758   | 0.914844 | Hck          |
| GO_CC_mεGO:000587microtubul1/540     | 148/23583 | 0.967908 | 0.977313 | 0.916262 | BC048507     |
| GO_CC_mεGO:00300Ecell-substr1/540    | 149/23583 | 0.968647 | 0.977313 | 0.916262 | Hck          |
| GO_CC_mεGO:000032lytic vacuol5/540   | 433/23583 | 0.971484 | 0.977313 | 0.916262 | Cyb561a3/    |
| GO_CC_mεGO:00057εlysosome5/540       | 433/23583 | 0.971484 | 0.977313 | 0.916262 | Cyb561a3/    |
| GO_CC_mεGO:00312Ecell project2/540   | 282/23583 | 0.989241 | 0.991831 | 0.929874 | Slc19a1/Slc  |
| GO_CC_mεGO:000557proteinace3/540     | 361/23583 | 0.98986  | 0.991831 | 0.929874 | Col27a1/Fk   |
| GO_CC_mεGO:003101extracellula4/540   | 447/23583 | 0.992245 | 0.992245 | 0.930263 | Col27a1/Fk   |
| GO_CC_mεGO:000591cell-cell jur28/714 | 473/23583 | 0.000631 | 0.261803 | 0.257274 | Abcb1b/Ak    |
| GO_CC_mεGO:00711εNF-kappaE2/714      | 2/23583   | 0.000915 | 0.261803 | 0.257274 | Rela/Rps3    |
| GO_CC_mεGO:00301εCOPII-coat6/714     | 50/23583  | 0.00386  | 0.542006 | 0.53263  | Lman1l/Se    |
| GO_CC_mεGO:001632basolateral14/714   | 223/23583 | 0.008282 | 0.542006 | 0.53263  | Abcc4/Age    |
| GO_CC_mεGO:004324Fanconi an3/714     | 15/23583  | 0.00958  | 0.542006 | 0.53263  | Faap100/C    |
| GO_CC_mεGO:00057εendoplasm6/714      | 68/23583  | 0.016875 | 0.542006 | 0.53263  | Car4/Nat8f   |
| GO_CC_mεGO:00165εNURF com2/714       | 7/23583   | 0.017374 | 0.542006 | 0.53263  | Smarca1/Si   |
| GO_CC_mεGO:000177immunolog4/714      | 35/23583  | 0.020739 | 0.542006 | 0.53263  | Bcl10/Lck/l  |
| GO_CC_mεGO:002262cytosolic ril10/714 | 157/23583 | 0.021455 | 0.542006 | 0.53263  | Gemin5/Gr    |
| GO_CC_mεGO:00313εanchored c3/714     | 20/23583  | 0.021462 | 0.542006 | 0.53263  | Car4/Folr1,  |
| GO_CC_mεGO:003167I band9/714         | 135/23583 | 0.021813 | 0.542006 | 0.53263  | Fhl2/Kcne1   |
| GO_CC_mεGO:00971εtetraspanin2/714    | 8/23583   | 0.022705 | 0.542006 | 0.53263  | Scimp/Tspa   |
| GO_CC_mεGO:00432εapical junc9/714    | 136/23583 | 0.022757 | 0.542006 | 0.53263  | Cgnl1/Cldr   |



|                                       |           |          |          |          |             |
|---------------------------------------|-----------|----------|----------|----------|-------------|
| GO_CC_m4GO:002262 cytosolic la 7/714  | 94/23583  | 0.024023 | 0.542006 | 0.53263  | Gemin5/Gr   |
| GO_CC_m4GO:001632 apical plasr 16/714 | 306/23583 | 0.024828 | 0.542006 | 0.53263  | Abcb1b/Ak   |
| GO_CC_m4GO:000592 bicellular ti 8/714 | 119/23583 | 0.028362 | 0.542006 | 0.53263  | Cgnl1/Cldr  |
| GO_CC_m4GO:000595 calcium- ai 1/714   | 1/23583   | 0.030276 | 0.542006 | 0.53263  | Camk1g      |
| GO_CC_m4GO:003125 cell trailing 1/714 | 1/23583   | 0.030276 | 0.542006 | 0.53263  | Scimp       |
| GO_CC_m4GO:003125 europod me 1/714    | 1/23583   | 0.030276 | 0.542006 | 0.53263  | Scimp       |
| GO_CC_m4GO:003147 myosin V c 1/714    | 1/23583   | 0.030276 | 0.542006 | 0.53263  | Dynll2      |
| GO_CC_m4GO:003471 SMN-Gem 1/714       | 1/23583   | 0.030276 | 0.542006 | 0.53263  | Gemin5      |
| GO_CC_m4GO:003552 NF-kappaE 1/714     | 1/23583   | 0.030276 | 0.542006 | 0.53263  | Rela        |
| GO_CC_m4GO:003803 G-protein i 1/714   | 1/23583   | 0.030276 | 0.542006 | 0.53263  | Grm1        |
| GO_CC_m4GO:004350 activin A cc 1/714  | 1/23583   | 0.030276 | 0.542006 | 0.53263  | Inhba       |
| GO_CC_m4GO:004818 activin cor 1/714   | 1/23583   | 0.030276 | 0.542006 | 0.53263  | Inhba       |
| GO_CC_m4GO:006047 cortical gra 1/714  | 1/23583   | 0.030276 | 0.542006 | 0.53263  | Astl        |
| GO_CC_m4GO:007154 eukaryotic 1/714    | 1/23583   | 0.030276 | 0.542006 | 0.53263  | Eif3a       |
| GO_CC_m4GO:009859 mucin grar 1/714    | 1/23583   | 0.030276 | 0.542006 | 0.53263  | Vamp8       |
| GO_CC_m4GO:199035 sumoylatec 1/714    | 1/23583   | 0.030276 | 0.542006 | 0.53263  | Ube2i       |
| GO_CC_m4GO:003123 intrinsic co 3/714  | 23/23583  | 0.031191 | 0.542006 | 0.53263  | Car4/Folr1  |
| GO_CC_m4GO:003001 Z disc 8/714        | 122/23583 | 0.032235 | 0.542006 | 0.53263  | Fhl2/Kcne1  |
| GO_CC_m4GO:007016 occluding j 8/714   | 122/23583 | 0.032235 | 0.542006 | 0.53263  | Cgnl1/Cldr  |
| GO_CC_m4GO:003122 anchored c 10/714   | 169/23583 | 0.03338  | 0.542006 | 0.53263  | Alpl2/Art4  |
| GO_CC_m4GO:003436 high-densi 3/714    | 24/23583  | 0.034867 | 0.542006 | 0.53263  | Apoa4/Apc   |
| GO_CC_m4GO:009744 apical denc 3/714   | 24/23583  | 0.034867 | 0.542006 | 0.53263  | Itsn1/Neur1 |
| GO_CC_m4GO:003101 SWI-type i 2/714    | 10/23583  | 0.03506  | 0.542006 | 0.53263  | Smarca1/Si  |
| GO_CC_m4GO:004658 intercellula 2/714  | 10/23583  | 0.03506  | 0.542006 | 0.53263  | Abcb1b/Ak   |
| GO_CC_m4GO:000825 oligosacch: 2/714   | 11/23583  | 0.042006 | 0.588141 | 0.577967 | Ostc/Stt3b  |
| GO_CC_m4GO:003001 myofibril 11/714    | 209/23583 | 0.054016 | 0.588141 | 0.577967 | Alpl2/Fhl2  |
| GO_CC_m4GO:001562 actin cytosl 21/714 | 474/23583 | 0.054018 | 0.588141 | 0.577967 | Abcb4/Ack   |
| GO_CC_m4GO:003001 sarcomere 10/714    | 185/23583 | 0.055591 | 0.588141 | 0.577967 | Fhl2/Kcne1  |
| GO_CC_m4GO:001634 catenin cor 3/714   | 29/23583  | 0.056383 | 0.588141 | 0.577967 | Cdh24/Cdh   |
| GO_CC_m4GO:000576 primary lys 2/714   | 13/23583  | 0.057256 | 0.588141 | 0.577967 | Mpo/Vamp    |
| GO_CC_m4GO:000591 fascia adhe 2/714   | 13/23583  | 0.057256 | 0.588141 | 0.577967 | Dsp/Sptan1  |
| GO_CC_m4GO:004258 azurophil c 2/714   | 13/23583  | 0.057256 | 0.588141 | 0.577967 | Mpo/Vamp    |
| GO_CC_m4GO:003152 brush bord 5/714    | 69/23583  | 0.057882 | 0.588141 | 0.577967 | Car4/Folr1  |
| GO_CC_m4GO:003121 RSF compl 1/714     | 2/23583   | 0.059637 | 0.588141 | 0.577967 | Smarca5     |
| GO_CC_m4GO:003557 azurophil c 1/714   | 2/23583   | 0.059637 | 0.588141 | 0.577967 | Vamp8       |
| GO_CC_m4GO:004351 inhibin A c 1/714   | 2/23583   | 0.059637 | 0.588141 | 0.577967 | Inhba       |
| GO_CC_m4GO:004361 multi-eIF c 1/714   | 2/23583   | 0.059637 | 0.588141 | 0.577967 | Eif3a       |
| GO_CC_m4GO:006018 cell pole 1/714     | 2/23583   | 0.059637 | 0.588141 | 0.577967 | Astn2       |
| GO_CC_m4GO:007043 Grb2-EGFF 1/714     | 2/23583   | 0.059637 | 0.588141 | 0.577967 | Grb2        |
| GO_CC_m4GO:009053 CERF com 1/714      | 2/23583   | 0.059637 | 0.588141 | 0.577967 | Smarca1     |
| GO_CC_m4GO:009744 spine appa 1/714    | 2/23583   | 0.059637 | 0.588141 | 0.577967 | Synpo       |
| GO_CC_m4GO:199002 hippocam 1/714      | 2/23583   | 0.059637 | 0.588141 | 0.577967 | Tnn         |
| GO_CC_m4GO:199003 pericellular 1/714  | 2/23583   | 0.059637 | 0.588141 | 0.577967 | Slc17a8     |
| GO_CC_m4GO:199061 CHOP-ATF 1/714      | 2/23583   | 0.059637 | 0.588141 | 0.577967 | Ddit3       |
| GO_CC_m4GO:199062 CHOP-ATF 1/714      | 2/23583   | 0.059637 | 0.588141 | 0.577967 | Ddit3       |
| GO_CC_m4GO:004278 polysomal 3/714     | 30/23583  | 0.06129  | 0.5942   | 0.583921 | Rpl24/Rpl3  |
| GO_CC_m4GO:004444 cytosolic p: 14/714 | 294/23583 | 0.064739 | 0.611315 | 0.60074  | Borcs7/Ger  |
| GO_CC_m4GO:003317 proton-tra 2/714    | 14/23583  | 0.065492 | 0.611315 | 0.60074  | Atp5c1/Atp  |

|                                       |           |          |          |          |             |
|---------------------------------------|-----------|----------|----------|----------|-------------|
| GO_CC_m4GO:004517apical part 18/714   | 403/23583 | 0.066261 | 0.611315 | 0.60074  | Abcb1b/Ak   |
| GO_CC_m4GO:00312C SNARE con4/714      | 51/23583  | 0.06814  | 0.612896 | 0.602293 | Sec22b/Sn   |
| GO_CC_m4GO:00166C PML body 5/714      | 73/23583  | 0.070286 | 0.612896 | 0.602293 | Agap3/Cbx   |
| GO_CC_m4GO:00058E striated mt 3/714   | 32/23583  | 0.071675 | 0.612896 | 0.602293 | Myom2/Ne    |
| GO_CC_m4GO:00056E DNA replic 2/714    | 15/23583  | 0.074094 | 0.612896 | 0.602293 | Purb/Xpa    |
| GO_CC_m4GO:00432C contractile 11/714  | 223/23583 | 0.077693 | 0.612896 | 0.602293 | Alpl2/Fhl2  |
| GO_CC_m4GO:004444contractile 10/714   | 199/23583 | 0.08159  | 0.612896 | 0.602293 | Fhl2/Kcne1  |
| GO_CC_m4GO:003637myofilamer 3/714     | 34/23583  | 0.082789 | 0.612896 | 0.602293 | Myom2/Ne    |
| GO_CC_m4GO:00058E eukaryotic 2/714    | 16/23583  | 0.083032 | 0.612896 | 0.602293 | Eif3a/Eif3e |
| GO_CC_m4GO:000011nucleotide 1/714     | 3/23583   | 0.08811  | 0.612896 | 0.602293 | Xpa         |
| GO_CC_m4GO:000597ribonucleo 1/714     | 3/23583   | 0.08811  | 0.612896 | 0.602293 | Rrm1        |
| GO_CC_m4GO:00310E platelet del 1/714  | 3/23583   | 0.08811  | 0.612896 | 0.602293 | Abcc4       |
| GO_CC_m4GO:00364E CHOP-C/E 1/714      | 3/23583   | 0.08811  | 0.612896 | 0.602293 | Ddit3       |
| GO_CC_m4GO:004351inhibin con 1/714    | 3/23583   | 0.08811  | 0.612896 | 0.602293 | Inhba       |
| GO_CC_m4GO:00466E intracellula 1/714  | 3/23583   | 0.08811  | 0.612896 | 0.602293 | Mip         |
| GO_CC_m4GO:00709E Dsl1/NZR c 1/714    | 3/23583   | 0.08811  | 0.612896 | 0.602293 | Nbas        |
| GO_CC_m4GO:009744CA3 pyram 1/714      | 3/23583   | 0.08811  | 0.612896 | 0.602293 | Tnn         |
| GO_CC_m4GO:00974E glial limitin 1/714 | 3/23583   | 0.08811  | 0.612896 | 0.602293 | Slc17a8     |
| GO_CC_m4GO:00974E hippocamp 1/714     | 3/23583   | 0.08811  | 0.612896 | 0.602293 | Tnn         |
| GO_CC_m4GO:00442C cell-cell co 5/714  | 79/23583  | 0.091402 | 0.612896 | 0.602293 | Ctnna1/Dsj  |
| GO_CC_m4GO:000561interstitial r 2/714 | 17/23583  | 0.092278 | 0.612896 | 0.602293 | Vit/Vwa1    |
| GO_CC_m4GO:00443C ribosomal 11/714    | 231/23583 | 0.093758 | 0.612896 | 0.602293 | Gemin5/Gr   |
| GO_CC_m4GO:00058E voltage-ga 3/714    | 36/23583  | 0.09459  | 0.612896 | 0.602293 | Cacna1b/C   |
| GO_CC_m4GO:00343E plasma lipc 3/714   | 36/23583  | 0.09459  | 0.612896 | 0.602293 | Apoa4/Apc   |
| GO_CC_m4GO:199077lipoprotein 3/714    | 36/23583  | 0.09459  | 0.612896 | 0.602293 | Apoa4/Apc   |
| GO_CC_m4GO:00466E anchored c 4/714    | 58/23583  | 0.098493 | 0.612896 | 0.602293 | Car4/Efna1  |
| GO_CC_m4GO:00343E very-low-c 2/714    | 18/23583  | 0.101805 | 0.612896 | 0.602293 | Apoa4/Apc   |
| GO_CC_m4GO:00343E triglyceride 2/714  | 18/23583  | 0.101805 | 0.612896 | 0.602293 | Apoa4/Apc   |
| GO_CC_m4GO:00329C protein-lip 3/714   | 38/23583  | 0.107033 | 0.612896 | 0.602293 | Apoa4/Apc   |
| GO_CC_m4GO:00147C intercalate 4/714   | 61/23583  | 0.11313  | 0.612896 | 0.602293 | Ctnna1/Dsj  |
| GO_CC_m4GO:00442C axonal gro 3/714    | 39/23583  | 0.113481 | 0.612896 | 0.602293 | Rtn4r/Tiam  |
| GO_CC_m4GO:00306E secretory g 5/714   | 85/23583  | 0.115403 | 0.612896 | 0.602293 | Abcc4/Car   |
| GO_CC_m4GO:00021E ribose pho 1/714    | 4/23583   | 0.115722 | 0.612896 | 0.602293 | Prps2       |
| GO_CC_m4GO:00308E smooth en 1/714     | 4/23583   | 0.115722 | 0.612896 | 0.602293 | Stx17       |
| GO_CC_m4GO:00315C mannosyltr 1/714    | 4/23583   | 0.115722 | 0.612896 | 0.602293 | Pigv        |
| GO_CC_m4GO:00320E NELF com 1/714      | 4/23583   | 0.115722 | 0.612896 | 0.602293 | Nelfe       |
| GO_CC_m4GO:003244CBM comp 1/714       | 4/23583   | 0.115722 | 0.612896 | 0.602293 | Bcl10       |
| GO_CC_m4GO:00425E germinal v 1/714    | 4/23583   | 0.115722 | 0.612896 | 0.602293 | Aurka       |
| GO_CC_m4GO:00428E platelet del 1/714  | 4/23583   | 0.115722 | 0.612896 | 0.602293 | Abcc4       |
| GO_CC_m4GO:00435E tRNA meth 1/714     | 4/23583   | 0.115722 | 0.612896 | 0.602293 | Wdr4        |
| GO_CC_m4GO:00443C dentate gy 1/714    | 4/23583   | 0.115722 | 0.612896 | 0.602293 | Tnn         |
| GO_CC_m4GO:00718E FANCM-M 1/714       | 4/23583   | 0.115722 | 0.612896 | 0.602293 | Cenps       |
| GO_CC_m4GO:00719E elastic fiber 1/714 | 4/23583   | 0.115722 | 0.612896 | 0.602293 | Eln         |
| GO_CC_m4GO:00974E smooth en 1/714     | 4/23583   | 0.115722 | 0.612896 | 0.602293 | Stx17       |
| GO_CC_m4GO:00974E astrocyte e 1/714   | 4/23583   | 0.115722 | 0.612896 | 0.602293 | Slc17a8     |
| GO_CC_m4GO:01200C apical plas 1/714   | 4/23583   | 0.115722 | 0.612896 | 0.602293 | Upk2        |
| GO_CC_m4GO:19906C IRE1-TRAF 1/714     | 4/23583   | 0.115722 | 0.612896 | 0.602293 | Ern2        |
| GO_CC_m4GO:00435C nuclear rep 3/714   | 40/23583  | 0.120073 | 0.621033 | 0.61029  | Purb/Smar   |

|                                      |           |          |          |          |             |
|--------------------------------------|-----------|----------|----------|----------|-------------|
| GO_CC_m4GO:000024pericentrio 2/714   | 20/23583  | 0.121601 | 0.621033 | 0.61029  | Cep152/Lc   |
| GO_CC_m4GO:001250ER to Golgi2/714    | 20/23583  | 0.121601 | 0.621033 | 0.61029  | Sec13/Sec2  |
| GO_CC_m4GO:009730glial cell pr 2/714 | 20/23583  | 0.121601 | 0.621033 | 0.61029  | Lgals3/Slc1 |
| GO_CC_m4GO:003612sperm flagr 6/714   | 112/23583 | 0.124687 | 0.626994 | 0.616148 | Catsper2/C  |
| GO_CC_m4GO:001660nuclear spe 13/714  | 302/23583 | 0.130132 | 0.626994 | 0.616148 | Arhgap18/   |
| GO_CC_m4GO:000584ribosome 12/714     | 275/23583 | 0.132255 | 0.626994 | 0.616148 | Aurkaip1/C  |
| GO_CC_m4GO:0097729+2 motile 6/714    | 114/23583 | 0.13244  | 0.626994 | 0.616148 | Catsper2/C  |
| GO_CC_m4GO:007000extracellula 5/714  | 89/23583  | 0.132903 | 0.626994 | 0.616148 | Bhmt/Car4   |
| GO_CC_m4GO:000560nuclear inn 3/714   | 42/23583  | 0.133662 | 0.626994 | 0.616148 | Atp1b4/Tr   |
| GO_CC_m4GO:001645myosin cor 4/714    | 65/23583  | 0.134028 | 0.626994 | 0.616148 | Cgnl1/Dynl  |
| GO_CC_m4GO:003101extracellula 18/714 | 447/23583 | 0.135695 | 0.626994 | 0.616148 | Apoa4/Csp   |
| GO_CC_m4GO:000557proteinace 15/714   | 361/23583 | 0.135802 | 0.626994 | 0.616148 | Eln/Emilin3 |
| GO_CC_m4GO:000560U1 snRNP 2/714      | 22/23583  | 0.142232 | 0.626994 | 0.616148 | Luc7l3/Snrj |
| GO_CC_m4GO:007101prespliceos 2/714   | 22/23583  | 0.142232 | 0.626994 | 0.616148 | Luc7l3/Snrj |
| GO_CC_m4GO:000027mitochond 1/714     | 5/23583   | 0.142499 | 0.626994 | 0.616148 | Atp5c1      |
| GO_CC_m4GO:003210chromosom 1/714     | 5/23583   | 0.142499 | 0.626994 | 0.616148 | Aurka       |
| GO_CC_m4GO:003597transcriptic 1/714  | 5/23583   | 0.142499 | 0.626994 | 0.616148 | Ddit3       |
| GO_CC_m4GO:004520proton-tra 1/714    | 5/23583   | 0.142499 | 0.626994 | 0.616148 | Atp5c1      |
| GO_CC_m4GO:009744basal dend 1/714    | 5/23583   | 0.142499 | 0.626994 | 0.616148 | Slc17a8     |
| GO_CC_m4GO:009850deuterosom 1/714    | 5/23583   | 0.142499 | 0.626994 | 0.616148 | Cep152      |
| GO_CC_m4GO:009882endoplasm 1/714     | 5/23583   | 0.142499 | 0.626994 | 0.616148 | Rtn4        |
| GO_CC_m4GO:003060transport v 6/714   | 119/23583 | 0.152787 | 0.629355 | 0.618468 | Car4/Sec13  |
| GO_CC_m4GO:000580axonemal c 2/714    | 23/23583  | 0.152808 | 0.629355 | 0.618468 | Casc1/Ccdc  |
| GO_CC_m4GO:004360nuclear rep 2/714   | 23/23583  | 0.152808 | 0.629355 | 0.618468 | Purb/Xpa    |
| GO_CC_m4GO:003014secretory g 16/714  | 398/23583 | 0.154013 | 0.629355 | 0.618468 | Abcc4/Ang   |
| GO_CC_m4GO:000560transcriptic 16/714 | 399/23583 | 0.156249 | 0.629355 | 0.618468 | Atf6b/Ddit  |
| GO_CC_m4GO:190350extracellula 5/714  | 95/23583  | 0.161202 | 0.629355 | 0.618468 | Bhmt/Car4   |
| GO_CC_m4GO:001640myosin II c 2/714   | 24/23583  | 0.16353  | 0.629355 | 0.618468 | My112a/My   |
| GO_CC_m4GO:003080replisome 2/714     | 24/23583  | 0.16353  | 0.629355 | 0.618468 | Purb/Xpa    |
| GO_CC_m4GO:003140M band 2/714        | 24/23583  | 0.16353  | 0.629355 | 0.618468 | Fhl2/Myom   |
| GO_CC_m4GO:004250zymogen c 2/714     | 24/23583  | 0.16353  | 0.629355 | 0.618468 | Tmed10/V    |
| GO_CC_m4GO:000591cell-cell ad 6/714  | 122/23583 | 0.165621 | 0.629355 | 0.618468 | Cadm2/Cd    |
| GO_CC_m4GO:001590large ribos 7/714   | 149/23583 | 0.166786 | 0.629355 | 0.618468 | Gemin5/Gr   |
| GO_CC_m4GO:000160dense fibril 1/714  | 6/23583   | 0.168466 | 0.629355 | 0.618468 | Vdr         |
| GO_CC_m4GO:000591zonula adh 1/714    | 6/23583   | 0.168466 | 0.629355 | 0.618468 | Ctnna1      |
| GO_CC_m4GO:001601sarcoglycar 1/714   | 6/23583   | 0.168466 | 0.629355 | 0.618468 | Sgcb        |
| GO_CC_m4GO:003080checkpoint 1/714    | 6/23583   | 0.168466 | 0.629355 | 0.618468 | Hus1        |
| GO_CC_m4GO:003120death-indu 1/714    | 6/23583   | 0.168466 | 0.629355 | 0.618468 | Ripk1       |
| GO_CC_m4GO:004660lipopolysac 1/714   | 6/23583   | 0.168466 | 0.629355 | 0.618468 | Bcl10       |
| GO_CC_m4GO:004870cytoskeletc 1/714   | 6/23583   | 0.168466 | 0.629355 | 0.618468 | Rims4       |
| GO_CC_m4GO:009722sperm ann 1/714     | 6/23583   | 0.168466 | 0.629355 | 0.618468 | 12-Sep      |
| GO_CC_m4GO:009734ripiptosom 1/714    | 6/23583   | 0.168466 | 0.629355 | 0.618468 | Ripk1       |
| GO_CC_m4GO:009742microtubul 1/714    | 6/23583   | 0.168466 | 0.629355 | 0.618468 | Mtcl1       |
| GO_CC_m4GO:000570Golgi-asso 6/714    | 123/23583 | 0.169998 | 0.629355 | 0.618468 | Lman1l/Se   |
| GO_CC_m4GO:003130integral coi 2/714  | 25/23583  | 0.17438  | 0.629355 | 0.618468 | Fundc2/To   |
| GO_CC_m4GO:003290protein-D 8/714     | 179/23583 | 0.176974 | 0.629355 | 0.618468 | Atf6b/Ddit  |
| GO_CC_m4GO:000577late endosc 8/714   | 180/23583 | 0.180677 | 0.629355 | 0.618468 | 5330417C2   |
| GO_CC_m4GO:003130intrinsic co 2/714  | 26/23583  | 0.18534  | 0.629355 | 0.618468 | Fundc2/To   |

|                                     |           |          |          |          |             |
|-------------------------------------|-----------|----------|----------|----------|-------------|
| GO_CC_m4GO:007097endoplasm2/714     | 26/23583  | 0.18534  | 0.629355 | 0.618468 | H2-Q10/Yi   |
| GO_CC_m4GO:000587microtubul16/714   | 412/23583 | 0.18687  | 0.629355 | 0.618468 | Aurka/Bcl1  |
| GO_CC_m4GO:001989extrinsic co8/714  | 183/23583 | 0.191987 | 0.629355 | 0.618468 | Cdh24/Cdh   |
| GO_CC_m4GO:000165fibrillar cen6/714 | 128/23583 | 0.192579 | 0.629355 | 0.618468 | Ager/Arhg   |
| GO_CC_m4GO:000034THO comp1/714      | 7/23583   | 0.193648 | 0.629355 | 0.618468 | Thoc5       |
| GO_CC_m4GO:000044THO comp1/714      | 7/23583   | 0.193648 | 0.629355 | 0.618468 | Thoc5       |
| GO_CC_m4GO:001601dystroglyca1/714   | 7/23583   | 0.193648 | 0.629355 | 0.618468 | Sgcb        |
| GO_CC_m4GO:001646unconventi1/714    | 7/23583   | 0.193648 | 0.629355 | 0.618468 | Dynll2      |
| GO_CC_m4GO:003047actin cortic1/714  | 7/23583   | 0.193648 | 0.629355 | 0.618468 | Wipf2       |
| GO_CC_m4GO:003193TORC1 cor1/714     | 7/23583   | 0.193648 | 0.629355 | 0.618468 | Akt1s1      |
| GO_CC_m4GO:003243cuticular pl1/714  | 7/23583   | 0.193648 | 0.629355 | 0.618468 | Sptan1      |
| GO_CC_m4GO:003258growth cor1/714    | 7/23583   | 0.193648 | 0.629355 | 0.618468 | Trpv2       |
| GO_CC_m4GO:003325I-kappaB/1/714     | 7/23583   | 0.193648 | 0.629355 | 0.618468 | Rela        |
| GO_CC_m4GO:004238paraspeckli1/714   | 7/23583   | 0.193648 | 0.629355 | 0.618468 | Sfpq        |
| GO_CC_m4GO:004321lateral loop1/714  | 7/23583   | 0.193648 | 0.629355 | 0.618468 | Erbp2       |
| GO_CC_m4GO:004430cerebellar r1/714  | 7/23583   | 0.193648 | 0.629355 | 0.618468 | Lrrc4b      |
| GO_CC_m4GO:006164endocytic r1/714   | 7/23583   | 0.193648 | 0.629355 | 0.618468 | Wipf2       |
| GO_CC_m4GO:007076gamma-se1/714      | 7/23583   | 0.193648 | 0.629355 | 0.618468 | Tmed10      |
| GO_CC_m4GO:009956presynaptic1/714   | 7/23583   | 0.193648 | 0.629355 | 0.618468 | Rims4       |
| GO_CC_m4GO:003068peribioson2/714    | 27/23583  | 0.196394 | 0.634676 | 0.623697 | Mdn1/Ppai   |
| GO_CC_m4GO:000584polysome 4/714     | 77/23583  | 0.204655 | 0.641587 | 0.630489 | Rpl24/Rpl3  |
| GO_CC_m4GO:000590brush bord6/714    | 131/23583 | 0.206647 | 0.641587 | 0.630489 | Car4/Folr1, |
| GO_CC_m4GO:004307germ cell n2/714   | 28/23583  | 0.207527 | 0.641587 | 0.630489 | Aurka/Kif6  |
| GO_CC_m4GO:000079condensin 1/714    | 8/23583   | 0.218068 | 0.641587 | 0.630489 | Ncapg2      |
| GO_CC_m4GO:000167female ger1/714    | 8/23583   | 0.218068 | 0.641587 | 0.630489 | Aurka       |
| GO_CC_m4GO:000567chromatin 1/714    | 8/23583   | 0.218068 | 0.641587 | 0.630489 | Smarca5     |
| GO_CC_m4GO:000589sodium:pot1/714    | 8/23583   | 0.218068 | 0.641587 | 0.630489 | Atp1b4      |
| GO_CC_m4GO:003099intraciliary 1/714 | 8/23583   | 0.218068 | 0.641587 | 0.630489 | Wdr35       |
| GO_CC_m4GO:003311endoplasm1/714     | 8/23583   | 0.218068 | 0.641587 | 0.630489 | Nat8f1      |
| GO_CC_m4GO:003803G-protein r1/714   | 8/23583   | 0.218068 | 0.641587 | 0.630489 | Grm1        |
| GO_CC_m4GO:004320axon hilloc1/714   | 8/23583   | 0.218068 | 0.641587 | 0.630489 | Aurka       |
| GO_CC_m4GO:004525pyruvate d1/714    | 8/23583   | 0.218068 | 0.641587 | 0.630489 | Pdhx        |
| GO_CC_m4GO:006161MICOS cor1/714     | 8/23583   | 0.218068 | 0.641587 | 0.630489 | Chchd6      |
| GO_CC_m4GO:007154eukaryotic 1/714   | 8/23583   | 0.218068 | 0.641587 | 0.630489 | Eif3a       |
| GO_CC_m4GO:007266tRNA-splic1/714    | 8/23583   | 0.218068 | 0.641587 | 0.630489 | Fam98c      |
| GO_CC_m4GO:009764G-protein r1/714   | 8/23583   | 0.218068 | 0.641587 | 0.630489 | Grm1        |
| GO_CC_m4GO:009907BORC com1/714      | 8/23583   | 0.218068 | 0.641587 | 0.630489 | Borcs7      |
| GO_CC_m4GO:009856intrinsic co2/714  | 29/23583  | 0.218723 | 0.641587 | 0.630489 | Slc17a8/Sy  |
| GO_CC_m4GO:004479nuclear tra18/714  | 191/23583 | 0.223508 | 0.647348 | 0.63615  | Atf6b/Ddit: |
| GO_CC_m4GO:004323extracellula5/714  | 107/23583 | 0.224002 | 0.647348 | 0.63615  | Bhmt/Car4.  |
| GO_CC_m4GO:000153cornified ei3/714  | 54/23583  | 0.224082 | 0.647348 | 0.63615  | Dsp/Lce1g.  |
| GO_CC_m4GO:004511intermedia7/714    | 163/23583 | 0.22543  | 0.647969 | 0.63676  | Faap100/B   |
| GO_CC_m4GO:003086cortical act4/714  | 81/23583  | 0.230262 | 0.652269 | 0.640986 | Cap2/Polr2  |
| GO_CC_m4GO:000563nuclear en15/714   | 399/23583 | 0.231001 | 0.652269 | 0.640986 | Ackr2/Atp1  |
| GO_CC_m4GO:003470calcium ch3/714    | 55/23583  | 0.232117 | 0.652269 | 0.640986 | Cacna1b/C   |
| GO_CC_m4GO:003125cell project11/714 | 282/23583 | 0.237296 | 0.652269 | 0.640986 | Car4/Folr1, |
| GO_CC_m4GO:002262cytosolic sr3/714  | 56/23583  | 0.240203 | 0.652269 | 0.640986 | Rps11/Rps:  |
| GO_CC_m4GO:004517intercellula3/714  | 56/23583  | 0.240203 | 0.652269 | 0.640986 | Krr1/Rfxanl |

|                                       |           |          |          |          |             |
|---------------------------------------|-----------|----------|----------|----------|-------------|
| GO_CC_m4GO:000024commitme 1/714       | 9/23583   | 0.24175  | 0.652269 | 0.640986 | Snrpc       |
| GO_CC_m4GO:00005C glycosylphc1/714    | 9/23583   | 0.24175  | 0.652269 | 0.640986 | Pigp        |
| GO_CC_m4GO:000152outer dens 1/714     | 9/23583   | 0.24175  | 0.652269 | 0.640986 | Odf3        |
| GO_CC_m4GO:004421spanning c 1/714     | 9/23583   | 0.24175  | 0.652269 | 0.640986 | Npc1l1      |
| GO_CC_m4GO:008971spanning c 1/714     | 9/23583   | 0.24175  | 0.652269 | 0.640986 | Npc1l1      |
| GO_CC_m4GO:009883presynaptic 1/714    | 9/23583   | 0.24175  | 0.652269 | 0.640986 | Rims4       |
| GO_CC_m4GO:009899anchored c 1/714     | 9/23583   | 0.24175  | 0.652269 | 0.640986 | Syn1        |
| GO_CC_m4GO:004533phagocytic 4/714     | 83/23583  | 0.243353 | 0.65351  | 0.642206 | Kif16b/Rab  |
| GO_CC_m4GO:003028dynein con 3/714     | 57/23583  | 0.248335 | 0.659262 | 0.647858 | Casc1/Ccdc  |
| GO_CC_m4GO:004217nuclear out 18/714   | 498/23583 | 0.253375 | 0.659262 | 0.647858 | Atf6b/Nat8  |
| GO_CC_m4GO:000591adherens jct 11/714  | 287/23583 | 0.254594 | 0.659262 | 0.647858 | Abcb4/Cac   |
| GO_CC_m4GO:001593small ribos 4/714    | 85/23583  | 0.256604 | 0.659262 | 0.647858 | Mrps16/Rp   |
| GO_CC_m4GO:003123extrinsic co 5/714   | 113/23583 | 0.257798 | 0.659262 | 0.647858 | Gnat1/Gng   |
| GO_CC_m4GO:190494ATPase cor 4/714     | 86/23583  | 0.263284 | 0.659262 | 0.647858 | Atp1b4/Srr  |
| GO_CC_m4GO:00328C neuronal c 2/714    | 33/23583  | 0.263871 | 0.659262 | 0.647858 | Cadm2/Flrt  |
| GO_CC_m4GO:000016protein phc 1/714    | 10/23583  | 0.264716 | 0.659262 | 0.647858 | Ppp1r15b    |
| GO_CC_m4GO:000574mitochond 1/714      | 10/23583  | 0.264716 | 0.659262 | 0.647858 | Tomm7       |
| GO_CC_m4GO:00166C flotillin con 1/714 | 10/23583  | 0.264716 | 0.659262 | 0.647858 | Ctnna1      |
| GO_CC_m4GO:003108nuclear poi 1/714    | 10/23583  | 0.264716 | 0.659262 | 0.647858 | Sec13       |
| GO_CC_m4GO:004429dendritic g 1/714    | 10/23583  | 0.264716 | 0.659262 | 0.647858 | Rtn4        |
| GO_CC_m4GO:006009kinocilium 1/714     | 10/23583  | 0.264716 | 0.659262 | 0.647858 | Tiam1       |
| GO_CC_m4GO:009053cation-tran 1/714    | 10/23583  | 0.264716 | 0.659262 | 0.647858 | Atp1b4      |
| GO_CC_m4GO:0097739+2 non-n 1/714      | 10/23583  | 0.264716 | 0.659262 | 0.647858 | Tiam1       |
| GO_CC_m4GO:003506micro-ribo 5/714     | 115/23583 | 0.269328 | 0.659262 | 0.647858 | Mir16-2/M   |
| GO_CC_m4GO:004429cell body n 2/714    | 34/23583  | 0.275189 | 0.659262 | 0.647858 | Cadm2/Flrt  |
| GO_CC_m4GO:004444axoneme p 2/714      | 34/23583  | 0.275189 | 0.659262 | 0.647858 | Casc1/Ccdc  |
| GO_CC_m4GO:000578endoplasm 17/714     | 476/23583 | 0.276894 | 0.659262 | 0.647858 | Atf6b/Nat8  |
| GO_CC_m4GO:003086cortical cyt 5/714   | 117/23583 | 0.280968 | 0.659262 | 0.647858 | Cap2/Polr2  |
| GO_CC_m4GO:00059C clathrin-co 3/714   | 61/23583  | 0.281225 | 0.659262 | 0.647858 | Ap1s3/ltsn  |
| GO_CC_m4GO:000577multivesicu 2/714    | 35/23583  | 0.286497 | 0.659262 | 0.647858 | Sftpa1/Slc1 |
| GO_CC_m4GO:000583heterotrim 2/714     | 35/23583  | 0.286497 | 0.659262 | 0.647858 | Gnat1/Gng   |
| GO_CC_m4GO:000818COP9 sign 2/714      | 35/23583  | 0.286497 | 0.659262 | 0.647858 | Cops2/Grb   |
| GO_CC_m4GO:190536GTPase cor 2/714     | 35/23583  | 0.286497 | 0.659262 | 0.647858 | Gnat1/Gng   |
| GO_CC_m4GO:00001C nucleotide 1/714    | 11/23583  | 0.286987 | 0.659262 | 0.647858 | Xpa         |
| GO_CC_m4GO:000193uropod 1/714         | 11/23583  | 0.286987 | 0.659262 | 0.647858 | Scimp       |
| GO_CC_m4GO:000558fibrillar coll 1/714 | 11/23583  | 0.286987 | 0.659262 | 0.647858 | Lum         |
| GO_CC_m4GO:003089HOPS com 1/714       | 11/23583  | 0.286987 | 0.659262 | 0.647858 | Stx17       |
| GO_CC_m4GO:003125cell trailing 1/714  | 11/23583  | 0.286987 | 0.659262 | 0.647858 | Scimp       |
| GO_CC_m4GO:003279SMN comp 1/714       | 11/23583  | 0.286987 | 0.659262 | 0.647858 | Gemin5      |
| GO_CC_m4GO:003615inner dynei 1/714    | 11/23583  | 0.286987 | 0.659262 | 0.647858 | Casc1       |
| GO_CC_m4GO:003615outer dyne 1/714     | 11/23583  | 0.286987 | 0.659262 | 0.647858 | Ccdc114     |
| GO_CC_m4GO:00617C GATOR2 c 1/714      | 11/23583  | 0.286987 | 0.659262 | 0.647858 | Sec13       |
| GO_CC_m4GO:007268meiotic spi 1/714    | 11/23583  | 0.286987 | 0.659262 | 0.647858 | Aurka       |
| GO_CC_m4GO:009864banded col 1/714     | 11/23583  | 0.286987 | 0.659262 | 0.647858 | Lum         |
| GO_CC_m4GO:000587microtubul 6/714     | 148/23583 | 0.292117 | 0.668365 | 0.656803 | Aurka/Casc  |
| GO_CC_m4GO:003151motile cilium 7/714  | 179/23583 | 0.299567 | 0.669884 | 0.658296 | Catsper2/C  |
| GO_CC_m4GO:004319dendritic sp 7/714   | 179/23583 | 0.299567 | 0.669884 | 0.658296 | Grm1/ltsn1  |
| GO_CC_m4GO:00059C microvillus 4/714   | 92/23583  | 0.303949 | 0.669884 | 0.658296 | Car2/Erbb2  |

|                                     |           |          |          |          |             |
|-------------------------------------|-----------|----------|----------|----------|-------------|
| GO_CC_m4GO:000017nuclear exc1/714   | 12/23583  | 0.308584 | 0.669884 | 0.658296 | Mphosph6    |
| GO_CC_m4GO:000034transcriptic1/714  | 12/23583  | 0.308584 | 0.669884 | 0.658296 | Thoc5       |
| GO_CC_m4GO:003612CatSper co1/714    | 12/23583  | 0.308584 | 0.669884 | 0.658296 | Catsper2    |
| GO_CC_m4GO:004261MHC class 1/714    | 12/23583  | 0.308584 | 0.669884 | 0.658296 | H2-Q10      |
| GO_CC_m4GO:004262chylomicro1/714    | 12/23583  | 0.308584 | 0.669884 | 0.658296 | Apoa4       |
| GO_CC_m4GO:00481ESet1C/COM1/714     | 12/23583  | 0.308584 | 0.669884 | 0.658296 | Dydc1       |
| GO_CC_m4GO:00985EATPase de1/714     | 12/23583  | 0.308584 | 0.669884 | 0.658296 | Atp1b4      |
| GO_CC_m4GO:00443Cneuron spii7/714   | 181/23583 | 0.309204 | 0.669884 | 0.658296 | Grm1/Itsn1  |
| GO_CC_m4GO:004444cell cortex 7/714  | 181/23583 | 0.309204 | 0.669884 | 0.658296 | Cap2/Myl1   |
| GO_CC_m4GO:00444E nucleolar p7/714  | 181/23583 | 0.309204 | 0.669884 | 0.658296 | Ager/Arhg;  |
| GO_CC_m4GO:00972Esperm part9/714    | 242/23583 | 0.312478 | 0.669884 | 0.658296 | Atp6v1e2/(  |
| GO_CC_m4GO:00701Eanchoring j11/714  | 303/23583 | 0.312554 | 0.669884 | 0.658296 | Abcb4/Cac   |
| GO_CC_m4GO:00988Ecluster of a7/714  | 182/23583 | 0.314045 | 0.669884 | 0.658296 | Car4/Folr1, |
| GO_CC_m4GO:00988Eendoplasm17/714    | 489/23583 | 0.314279 | 0.669884 | 0.658296 | Atf6b/NatE  |
| GO_CC_m4GO:00125Cvesicle mer11/714  | 304/23583 | 0.316285 | 0.669884 | 0.658296 | Abcc4/Car   |
| GO_CC_m4GO:00347Cmethyltran4/714    | 94/23583  | 0.317666 | 0.669884 | 0.658296 | Cbx5/Dydc   |
| GO_CC_m4GO:00432Cmyelin she8/714    | 213/23583 | 0.318123 | 0.669884 | 0.658296 | Atp5c1/Car  |
| GO_CC_m4GO:00306Ecytoplasmii10/714  | 274/23583 | 0.318701 | 0.669884 | 0.658296 | Abcc4/Car   |
| GO_CC_m4GO:00907Esite of DN2/714    | 38/23583  | 0.320269 | 0.669884 | 0.658296 | Hus1/Polk   |
| GO_CC_m4GO:00325Eruffle mem3/714    | 66/23583  | 0.3228   | 0.669884 | 0.658296 | Rps3/Spat   |
| GO_CC_m4GO:000594septin ring1/714   | 13/23583  | 0.329528 | 0.669884 | 0.658296 | 12-Sep      |
| GO_CC_m4GO:001651SWI/SNF c1/714     | 13/23583  | 0.329528 | 0.669884 | 0.658296 | Smarcd2     |
| GO_CC_m4GO:00171C aminoacyl-1/714   | 13/23583  | 0.329528 | 0.669884 | 0.658296 | lars        |
| GO_CC_m4GO:003012COPII vesic1/714   | 13/23583  | 0.329528 | 0.669884 | 0.658296 | Sec13       |
| GO_CC_m4GO:00311Cseptin com1/714    | 13/23583  | 0.329528 | 0.669884 | 0.658296 | 12-Sep      |
| GO_CC_m4GO:00321Eseptin filan1/714  | 13/23583  | 0.329528 | 0.669884 | 0.658296 | 12-Sep      |
| GO_CC_m4GO:00442EER-mitoch1/714     | 13/23583  | 0.329528 | 0.669884 | 0.658296 | Stx17       |
| GO_CC_m4GO:009744astrocyte p1/714   | 13/23583  | 0.329528 | 0.669884 | 0.658296 | Slc17a8     |
| GO_CC_m4GO:00431Edendritic sl3/714  | 67/23583  | 0.331133 | 0.669884 | 0.658296 | Cacna1b/R   |
| GO_CC_m4GO:00313Cintrinsic co7/714  | 186/23583 | 0.333537 | 0.669884 | 0.658296 | Bet1l/Chch  |
| GO_CC_m4GO:000032lytic vacuol15/714 | 433/23583 | 0.333771 | 0.669884 | 0.658296 | Borcs7/53E  |
| GO_CC_m4GO:00057Elysosome 15/714    | 433/23583 | 0.333771 | 0.669884 | 0.658296 | Borcs7/53E  |
| GO_CC_m4GO:00325Eintegral coi3/714  | 68/23583  | 0.339463 | 0.678331 | 0.666596 | Chchd6/Fu   |
| GO_CC_m4GO:00487Epresynaptic2/714   | 40/23583  | 0.342571 | 0.678331 | 0.666596 | Rims4/Syn:  |
| GO_CC_m4GO:00997Ecell cortex 2/714  | 40/23583  | 0.342571 | 0.678331 | 0.666596 | Myl12a/Rir  |
| GO_CC_m4GO:00056Ereplication 3/714  | 69/23583  | 0.347786 | 0.678331 | 0.666596 | Purb/Smar   |
| GO_CC_m4GO:000094condensed1/714     | 14/23583  | 0.349838 | 0.678331 | 0.666596 | Spdl1       |
| GO_CC_m4GO:000567Ada2/GcnE1/714     | 14/23583  | 0.349838 | 0.678331 | 0.666596 | Dr1         |
| GO_CC_m4GO:00057E DNA-direc1/714    | 14/23583  | 0.349838 | 0.678331 | 0.666596 | Polr1e      |
| GO_CC_m4GO:00360E MKS comp1/714     | 14/23583  | 0.349838 | 0.678331 | 0.666596 | Tmem231     |
| GO_CC_m4GO:00425Ezymogen c1/714     | 14/23583  | 0.349838 | 0.678331 | 0.666596 | Tmed10      |
| GO_CC_m4GO:00987Eouter mito1/714    | 14/23583  | 0.349838 | 0.678331 | 0.666596 | Tomm7       |
| GO_CC_m4GO:00058Ecytoplasmii3/714   | 70/23583  | 0.356098 | 0.683652 | 0.671825 | Bcl10/Casc  |
| GO_CC_m4GO:00985Eintrinsic co3/714  | 70/23583  | 0.356098 | 0.683652 | 0.671825 | Chchd6/Fu   |
| GO_CC_m4GO:00301Eendocytic \6/714   | 160/23583 | 0.356168 | 0.683652 | 0.671825 | Itsn1/Kif16 |
| GO_CC_m4GO:00057E nuclear het2/714  | 42/23583  | 0.364635 | 0.697563 | 0.685496 | Cbx5/Vdr    |
| GO_CC_m4GO:00310EBLOC-1 co1/714     | 15/23583  | 0.369534 | 0.697603 | 0.685535 | Snap47      |
| GO_CC_m4GO:00314E Cul2-RING1/714    | 15/23583  | 0.369534 | 0.697603 | 0.685535 | Zswim4      |

|                                       |           |          |          |          |             |
|---------------------------------------|-----------|----------|----------|----------|-------------|
| GO_CC_m4GO:003215 septin cyto 1/714   | 15/23583  | 0.369534 | 0.697603 | 0.685535 | 12-Sep      |
| GO_CC_m4GO:003471 SMN-Sm p 1/714      | 15/23583  | 0.369534 | 0.697603 | 0.685535 | Gemin5      |
| GO_CC_m4GO:003586 ciliary trans 3/714 | 72/23583  | 0.372676 | 0.698921 | 0.686831 | Gnat1/Nph   |
| GO_CC_m4GO:007060 SWI/SNF st 3/714    | 72/23583  | 0.372676 | 0.698921 | 0.686831 | Smarca1/Si  |
| GO_CC_m4GO:000992 basal plas 2/714    | 43/23583  | 0.375561 | 0.699743 | 0.687638 | Ager/Erbp2  |
| GO_CC_m4GO:003167 A band 2/714        | 43/23583  | 0.375561 | 0.699743 | 0.687638 | Fhl2/Myor   |
| GO_CC_m4GO:000802 synaptic ve 7/714   | 195/23583 | 0.377915 | 0.701843 | 0.689702 | Ctnnbp2/M   |
| GO_CC_m4GO:000593 cell cortex 10/714  | 290/23583 | 0.382972 | 0.703478 | 0.691308 | Arhgap32/   |
| GO_CC_m4GO:003239 photorecep 2/714    | 44/23583  | 0.386409 | 0.703478 | 0.691308 | Gnat1/Nph   |
| GO_CC_m4GO:003013 transport v 10/714  | 291/23583 | 0.387037 | 0.703478 | 0.691308 | Car4/Ctnnb  |
| GO_CC_m4GO:000585 muscle myo 1/714    | 16/23583  | 0.388634 | 0.703478 | 0.691308 | Myom2       |
| GO_CC_m4GO:001036 chromocer 1/714     | 16/23583  | 0.388634 | 0.703478 | 0.691308 | Cbx5        |
| GO_CC_m4GO:003001 CCR4-NOT 1/714      | 16/23583  | 0.388634 | 0.703478 | 0.691308 | Cnot6       |
| GO_CC_m4GO:003585 Seh1-assoc 1/714    | 16/23583  | 0.388634 | 0.703478 | 0.691308 | Sec13       |
| GO_CC_m4GO:003820 TOR compl 1/714     | 16/23583  | 0.388634 | 0.703478 | 0.691308 | Akt1s1      |
| GO_CC_m4GO:003509 histone me 3/714    | 75/23583  | 0.397378 | 0.712213 | 0.699893 | Cbx5/Dydc   |
| GO_CC_m4GO:199020 oxidoreduc 4/714    | 106/23583 | 0.400337 | 0.712213 | 0.699893 | Ndufb10/N   |
| GO_CC_m4GO:003013 coated ves 6/714    | 169/23583 | 0.404857 | 0.712213 | 0.699893 | Lman1/Sec   |
| GO_CC_m4GO:000013 Golgi mem 8/714     | 232/23583 | 0.404907 | 0.712213 | 0.699893 | Abcb1b/Ak   |
| GO_CC_m4GO:001601 dystrophin 1/714    | 17/23583  | 0.407157 | 0.712213 | 0.699893 | Sgcb        |
| GO_CC_m4GO:003161 spindle pol 1/714   | 17/23583  | 0.407157 | 0.712213 | 0.699893 | Aurka       |
| GO_CC_m4GO:003327 paranode r 1/714    | 17/23583  | 0.407157 | 0.712213 | 0.699893 | Sptan1      |
| GO_CC_m4GO:004210 T cell recep 1/714  | 17/23583  | 0.407157 | 0.712213 | 0.699893 | Bcl10       |
| GO_CC_m4GO:007100 U2-type pr 1/714    | 17/23583  | 0.407157 | 0.712213 | 0.699893 | Luc7l3      |
| GO_CC_m4GO:009066 glycoprote 1/714    | 17/23583  | 0.407157 | 0.712213 | 0.699893 | Sgcb        |
| GO_CC_m4GO:009864 complex of 1/714    | 17/23583  | 0.407157 | 0.712213 | 0.699893 | Lum         |
| GO_CC_m4GO:000172 ruffle 5/714        | 139/23583 | 0.412516 | 0.719388 | 0.706944 | Frmd4b/M    |
| GO_CC_m4GO:003130 integral coi 6/714  | 172/23583 | 0.421057 | 0.732051 | 0.719387 | Bet1l/Chch  |
| GO_CC_m4GO:003152 microvillus 1/714   | 18/23583  | 0.425119 | 0.732364 | 0.719695 | Muc4        |
| GO_CC_m4GO:004429 dendrite te 1/714   | 18/23583  | 0.425119 | 0.732364 | 0.719695 | Rtn4        |
| GO_CC_m4GO:000077 condensed 2/714     | 48/23583  | 0.42892  | 0.732364 | 0.719695 | Aurka/Spdl  |
| GO_CC_m4GO:000574 mitochond 2/714     | 48/23583  | 0.42892  | 0.732364 | 0.719695 | Ndufb10/N   |
| GO_CC_m4GO:003096 NADH deh 2/714      | 48/23583  | 0.42892  | 0.732364 | 0.719695 | Ndufb10/N   |
| GO_CC_m4GO:004527 respiratory 2/714   | 48/23583  | 0.42892  | 0.732364 | 0.719695 | Ndufb10/N   |
| GO_CC_m4GO:000576 early endo 8/714    | 239/23583 | 0.43709  | 0.74232  | 0.729479 | Kif16b/Lipc |
| GO_CC_m4GO:012011 Sm-like prc 3/714   | 80/23583  | 0.43791  | 0.74232  | 0.729479 | Gemin5/Lu   |
| GO_CC_m4GO:001646 proton-tra 2/714    | 49/23583  | 0.439305 | 0.74232  | 0.729479 | Atp5c1/Atp  |
| GO_CC_m4GO:003109 platelet alp 1/714  | 19/23583  | 0.442537 | 0.74232  | 0.729479 | F5          |
| GO_CC_m4GO:004423 organelle r 1/714   | 19/23583  | 0.442537 | 0.74232  | 0.729479 | Stx17       |
| GO_CC_m4GO:009072 growth cor 1/714    | 19/23583  | 0.442537 | 0.74232  | 0.729479 | Trpv2       |
| GO_CC_m4GO:003068 preribosom 3/714    | 81/23583  | 0.445896 | 0.745768 | 0.732867 | Krr1/Mdn1   |
| GO_CC_m4GO:001986 organelle ii 15/714 | 468/23583 | 0.447906 | 0.746945 | 0.734024 | Atp1b4/Atp  |
| GO_CC_m4GO:000558 collagen tri 3/714  | 82/23583  | 0.453837 | 0.754636 | 0.741582 | Lum/Mbl1/   |
| GO_CC_m4GO:004430 neuron prc 7/714    | 211/23583 | 0.457008 | 0.757329 | 0.744228 | Cacna1b/Fi  |
| GO_CC_m4GO:003028 integral coi 1/714  | 20/23583  | 0.459428 | 0.757329 | 0.744228 | Slc17a8     |
| GO_CC_m4GO:003108 BLOC com 1/714      | 20/23583  | 0.459428 | 0.757329 | 0.744228 | Snap47      |
| GO_CC_m4GO:007038 exocytic ve 7/714   | 213/23583 | 0.466789 | 0.767251 | 0.753979 | Ctnnbp2/M   |
| GO_CC_m4GO:001705 transcriptic 3/714  | 84/23583  | 0.469573 | 0.768033 | 0.754748 | Cbx5/Gata   |

|                                               |           |          |          |          |             |
|-----------------------------------------------|-----------|----------|----------|----------|-------------|
| GO_CC_m4GO:004443cytoplasmic15/714            | 475/23583 | 0.470885 | 0.768033 | 0.754748 | Abcc4/Car4  |
| GO_CC_m4GO:000042autophagosome1/714           | 21/23583  | 0.475809 | 0.768033 | 0.754748 | Stx17       |
| GO_CC_m4GO:000167male germ cell1/714          | 21/23583  | 0.475809 | 0.768033 | 0.754748 | Kif6        |
| GO_CC_m4GO:000568anaphase-plate1/714          | 21/23583  | 0.475809 | 0.768033 | 0.754748 | Anapc2      |
| GO_CC_m4GO:001632apicolateral1/714            | 21/23583  | 0.475809 | 0.768033 | 0.754748 | Mtcl1       |
| GO_CC_m4GO:009956cytoplasmic14/714            | 444/23583 | 0.476664 | 0.768033 | 0.754748 | Abhd13/Ar   |
| GO_CC_m4GO:000587spindle microtubule2/714     | 53/23583  | 0.479772 | 0.77087  | 0.757535 | Aurka/Polk  |
| GO_CC_m4GO:000572pericentriolar region1/714   | 22/23583  | 0.491693 | 0.772277 | 0.758918 | Cbx5        |
| GO_CC_m4GO:000575mitochondrial1/714           | 22/23583  | 0.491693 | 0.772277 | 0.758918 | Atp5c1      |
| GO_CC_m4GO:000579Golgi medial1/714            | 22/23583  | 0.491693 | 0.772277 | 0.758918 | H2-Q10      |
| GO_CC_m4GO:007178endoplasmic reticulum1/714   | 22/23583  | 0.491693 | 0.772277 | 0.758918 | Rtn4        |
| GO_CC_m4GO:003067synaptic vesicle3/714        | 87/23583  | 0.492785 | 0.772277 | 0.758918 | Slc17a8/Sn  |
| GO_CC_m4GO:009950exocytic vesicle3/714        | 87/23583  | 0.492785 | 0.772277 | 0.758918 | Slc17a8/Sn  |
| GO_CC_m4GO:004512membrane11/714               | 350/23583 | 0.492831 | 0.772277 | 0.758918 | Bcl10/Ctnn  |
| GO_CC_m4GO:009885membrane11/714               | 350/23583 | 0.492831 | 0.772277 | 0.758918 | Bcl10/Ctnn  |
| GO_CC_m4GO:009879Golgi subcompartment13/714   | 416/23583 | 0.493345 | 0.772277 | 0.758918 | 5330417C2   |
| GO_CC_m4GO:000092spindle pole body4/714       | 120/23583 | 0.494188 | 0.772277 | 0.758918 | Aurka/Map   |
| GO_CC_m4GO:001000endosome6/714                | 186/23583 | 0.495499 | 0.772277 | 0.758918 | Ehd4/Erbb3  |
| GO_CC_m4GO:000587kinesin complex2/714         | 55/23583  | 0.499323 | 0.77556  | 0.762144 | Kif16b/Kif6 |
| GO_CC_m4GO:000017exosome (fluid)1/714         | 23/23583  | 0.507097 | 0.77556  | 0.762144 | Mphosph6    |
| GO_CC_m4GO:003013COPI-coated vesicle1/714     | 23/23583  | 0.507097 | 0.77556  | 0.762144 | Tmed10      |
| GO_CC_m4GO:004261MHC protein1/714             | 23/23583  | 0.507097 | 0.77556  | 0.762144 | H2-Q10      |
| GO_CC_m4GO:004512pronucleus1/714              | 23/23583  | 0.507097 | 0.77556  | 0.762144 | Aurka       |
| GO_CC_m4GO:004525proton-transporter1/714      | 23/23583  | 0.507097 | 0.77556  | 0.762144 | Atp5c1      |
| GO_CC_m4GO:190535exoribonuclease1/714         | 23/23583  | 0.507097 | 0.77556  | 0.762144 | Mphosph6    |
| GO_CC_m4GO:000581spindle8/714                 | 255/23583 | 0.509521 | 0.777189 | 0.763745 | Aurka/Map   |
| GO_CC_m4GO:000588intermediate filament4/714   | 123/23583 | 0.513531 | 0.7798   | 0.766311 | Bfsp2/Dsp   |
| GO_CC_m4GO:001406postsynaptic8/714            | 256/23583 | 0.513959 | 0.7798   | 0.766311 | Cap2/Grm1   |
| GO_CC_m4GO:003005desmosome1/714               | 24/23583  | 0.522035 | 0.781721 | 0.768198 | Dsp         |
| GO_CC_m4GO:003258trans-Golgi1/714             | 24/23583  | 0.522035 | 0.781721 | 0.768198 | Rab31       |
| GO_CC_m4GO:009879presynaptic12/714            | 391/23583 | 0.522037 | 0.781721 | 0.768198 | Cacna1b/C   |
| GO_CC_m4GO:004521postsynaptic8/714            | 258/23583 | 0.522796 | 0.781721 | 0.768198 | Arc/Arhgap  |
| GO_CC_m4GO:009957postsynaptic8/714            | 258/23583 | 0.522796 | 0.781721 | 0.768198 | Cap2/Grm1   |
| GO_CC_m4GO:009057RNA polymerase5/714          | 158/23583 | 0.523425 | 0.781721 | 0.768198 | Atf6b/Ddit3 |
| GO_CC_m4GO:003042growth cone6/714             | 192/23583 | 0.526442 | 0.784084 | 0.77052  | Cbarp/Rtn4  |
| GO_CC_m4GO:001632lateral plasma membrane2/714 | 58/23583  | 0.527749 | 0.784084 | 0.77052  | Mtcl1/Spta  |
| GO_CC_m4GO:003227asymmetric8/714              | 260/23583 | 0.531575 | 0.787094 | 0.773478 | Cap2/Grm1   |
| GO_CC_m4GO:005503recycling endosome4/714      | 126/23583 | 0.532527 | 0.787094 | 0.773478 | Ehd4/Mlc1   |
| GO_CC_m4GO:000590caveola3/714                 | 93/23583  | 0.537626 | 0.791045 | 0.777361 | Ctnna1/Mlc  |
| GO_CC_m4GO:009858membrane11/714               | 362/23583 | 0.537966 | 0.791045 | 0.777361 | Bcl10/Ctnn  |
| GO_CC_m4GO:001989extrinsic coiled-coil9/714   | 296/23583 | 0.542043 | 0.792787 | 0.779073 | Cdh24/Cdh   |
| GO_CC_m4GO:009898neuron to neuron8/714        | 263/23583 | 0.54463  | 0.792787 | 0.779073 | Cap2/Grm1   |
| GO_CC_m4GO:003606ciliary base4/714            | 128/23583 | 0.544984 | 0.792787 | 0.779073 | Cep41/Ptp   |
| GO_CC_m4GO:015003distal axon11/714            | 364/23583 | 0.54536  | 0.792787 | 0.779073 | Cacna1b/C   |
| GO_CC_m4GO:003066Golgi-associated2/714        | 60/23583  | 0.546082 | 0.792787 | 0.779073 | Sec13/Sec2  |
| GO_CC_m4GO:000078condensed1/714               | 26/23583  | 0.550568 | 0.792787 | 0.779073 | Aurka       |
| GO_CC_m4GO:003158nucleotide1/714              | 26/23583  | 0.550568 | 0.792787 | 0.779073 | Prkag1      |
| GO_CC_m4GO:004442extracellular4/714           | 129/23583 | 0.551148 | 0.792787 | 0.779073 | Eln/Hmgn2   |



|                                      |           |          |          |          |             |
|--------------------------------------|-----------|----------|----------|----------|-------------|
| GO_CC_m4GO:003042site of pola6/714   | 197/23583 | 0.551625 | 0.792787 | 0.779073 | Cbarp/Rtn4  |
| GO_CC_m4GO:000077kinetochori4/714    | 130/23583 | 0.557268 | 0.79889  | 0.785071 | Cenps/Cbx   |
| GO_CC_m4GO:000586cytoplasmic1/714    | 27/23583  | 0.56419  | 0.80434  | 0.790426 | Dynll2      |
| GO_CC_m4GO:003326axon part 13/714    | 437/23583 | 0.565288 | 0.80434  | 0.790426 | Aurka/Cacr  |
| GO_CC_m4GO:004444ciliary part 13/714 | 437/23583 | 0.565288 | 0.80434  | 0.790426 | Casc1/Ccd   |
| GO_CC_m4GO:004326perikaryon 4/714    | 132/23583 | 0.569371 | 0.805727 | 0.79179  | Esr2/Neurl  |
| GO_CC_m4GO:003031T-tubule 2/714      | 63/23583  | 0.572636 | 0.805727 | 0.79179  | Slc8a1/Vdr  |
| GO_CC_m4GO:004443Golgi appa14/714    | 474/23583 | 0.575775 | 0.805727 | 0.79179  | 5330417C2   |
| GO_CC_m4GO:004466MLL1/2 core1/714    | 28/23583  | 0.5774   | 0.805727 | 0.79179  | Max         |
| GO_CC_m4GO:007133MLL1 core1/714      | 28/23583  | 0.5774   | 0.805727 | 0.79179  | Max         |
| GO_CC_m4GO:199075microtubul1/714     | 28/23583  | 0.5774   | 0.805727 | 0.79179  | Nav3        |
| GO_CC_m4GO:009752spliceosom2/714     | 64/23583  | 0.581233 | 0.805727 | 0.79179  | Luc7l3/Snrj |
| GO_CC_m4GO:000079condensed7/714      | 238/23583 | 0.584022 | 0.805727 | 0.79179  | Aurka/Hus   |
| GO_CC_m4GO:003196nuclear me7/714     | 238/23583 | 0.584022 | 0.805727 | 0.79179  | Ackr2/Atp1  |
| GO_CC_m4GO:000579rough endr3/714     | 100/23583 | 0.586953 | 0.805727 | 0.79179  | Car4/F12/S  |
| GO_CC_m4GO:000592focal adhe4/714     | 135/23583 | 0.587175 | 0.805727 | 0.79179  | Abcb4/Flrt  |
| GO_CC_m4GO:00988cinner mitoc4/714    | 135/23583 | 0.587175 | 0.805727 | 0.79179  | Atp5c1/Ch   |
| GO_CC_m4GO:000568U2-type sp2/714     | 65/23583  | 0.589701 | 0.805727 | 0.79179  | Luc7l3/Snrj |
| GO_CC_m4GO:009902tethering c2/714    | 65/23583  | 0.589701 | 0.805727 | 0.79179  | Nbas/Stx17  |
| GO_CC_m4GO:000031organellar1/714     | 29/23583  | 0.590209 | 0.805727 | 0.79179  | Mrps16      |
| GO_CC_m4GO:000576mitochond1/714      | 29/23583  | 0.590209 | 0.805727 | 0.79179  | Mrps16      |
| GO_CC_m4GO:009743mitotic spir1/714   | 29/23583  | 0.590209 | 0.805727 | 0.79179  | Aurka       |
| GO_CC_m4GO:004517basal part r2/714   | 66/23583  | 0.598042 | 0.814476 | 0.800387 | Ager/ErbB2  |
| GO_CC_m4GO:009722sperm prin1/714     | 30/23583  | 0.602632 | 0.818777 | 0.804614 | Catspere2   |
| GO_CC_m4GO:004444endosomal6/714      | 209/23583 | 0.609395 | 0.823409 | 0.809165 | Ehd4/ErbB   |
| GO_CC_m4GO:000564nuclear poi2/714    | 68/23583  | 0.614339 | 0.823409 | 0.809165 | Parp11/Sec  |
| GO_CC_m4GO:003283dendrite cy1/714    | 31/23583  | 0.614678 | 0.823409 | 0.809165 | Abhd13      |
| GO_CC_m4GO:004247melanoson1/714      | 31/23583  | 0.614678 | 0.823409 | 0.809165 | Mreg        |
| GO_CC_m4GO:004877pigment gr1/714     | 31/23583  | 0.614678 | 0.823409 | 0.809165 | Mreg        |
| GO_CC_m4GO:005123spindle mic1/714    | 31/23583  | 0.614678 | 0.823409 | 0.809165 | Aurka       |
| GO_CC_m4GO:000581centriole 3/714     | 105/23583 | 0.620055 | 0.824465 | 0.810203 | Cep152/Ce   |
| GO_CC_m4GO:000592cell-substr4/714    | 141/23583 | 0.62146  | 0.824465 | 0.810203 | Abcb4/Flrt  |
| GO_CC_m4GO:000575mitochond2/714      | 69/23583  | 0.622296 | 0.824465 | 0.810203 | Ak3/Cycs    |
| GO_CC_m4GO:003066coated ves2/714     | 69/23583  | 0.622296 | 0.824465 | 0.810203 | Sec13/Sec2  |
| GO_CC_m4GO:000077condensed1/714      | 32/23583  | 0.626359 | 0.824465 | 0.810203 | Spdl1       |
| GO_CC_m4GO:009056nuclear tra1/714    | 32/23583  | 0.626359 | 0.824465 | 0.810203 | Smarca5     |
| GO_CC_m4GO:000577peroxisom4/714      | 142/23583 | 0.626997 | 0.824465 | 0.810203 | Nudt7/Pex   |
| GO_CC_m4GO:004257microbody4/714      | 142/23583 | 0.626997 | 0.824465 | 0.810203 | Nudt7/Pex   |
| GO_CC_m4GO:003053small nucle2/714    | 70/23583  | 0.630125 | 0.824487 | 0.810224 | Luc7l3/Snrj |
| GO_CC_m4GO:004445mitochond6/714      | 214/23583 | 0.632216 | 0.824487 | 0.810224 | Atp5c1/Ch   |
| GO_CC_m4GO:009773non-motile4/714     | 143/23583 | 0.632481 | 0.824487 | 0.810224 | Gnat1/Nph   |
| GO_CC_m4GO:009773photorece3/714      | 107/23583 | 0.632779 | 0.824487 | 0.810224 | Gnat1/Nph   |
| GO_CC_m4GO:000592gap junctio1/714    | 33/23583  | 0.637687 | 0.828993 | 0.814652 | Mip         |
| GO_CC_m4GO:000574mitochond12/714     | 426/23583 | 0.641157 | 0.831614 | 0.817229 | Atp5c1/Ch   |
| GO_CC_m4GO:003125leading ed4/714     | 145/23583 | 0.643294 | 0.831929 | 0.817537 | Rps3/Scimj  |
| GO_CC_m4GO:000989cytoplasmic5/714    | 182/23583 | 0.64859  | 0.831929 | 0.817537 | Gnat1/Gng   |
| GO_CC_m4GO:000579smooth en1/714      | 34/23583  | 0.648672 | 0.831929 | 0.817537 | Stx17       |
| GO_CC_m4GO:003099intraciliary 1/714  | 34/23583  | 0.648672 | 0.831929 | 0.817537 | Wdr35       |

|                                      |           |          |          |          |             |
|--------------------------------------|-----------|----------|----------|----------|-------------|
| GO_CC_m4GO:009883postsynapt 1/714    | 34/23583  | 0.648672 | 0.831929 | 0.817537 | Grm1        |
| GO_CC_m4GO:003586site of doubl 1/714 | 35/23583  | 0.659324 | 0.833673 | 0.819252 | Hus1        |
| GO_CC_m4GO:008000Cul4-RING 1/714     | 35/23583  | 0.659324 | 0.833673 | 0.819252 | Dcaf17      |
| GO_CC_m4GO:000078nuclear chr 2/714   | 74/23583  | 0.660178 | 0.833673 | 0.819252 | Cbx5/Thoc   |
| GO_CC_m4GO:000172stress fiber 2/714  | 74/23583  | 0.660178 | 0.833673 | 0.819252 | Myl12a/Syr  |
| GO_CC_m4GO:009751contractile 2/714   | 74/23583  | 0.660178 | 0.833673 | 0.819252 | Myl12a/Syr  |
| GO_CC_m4GO:0097739+0 non-n 3/714     | 112/23583 | 0.66328  | 0.833673 | 0.819252 | Gnat1/Nph   |
| GO_CC_m4GO:003005cell-substr: 4/714  | 149/23583 | 0.664285 | 0.833673 | 0.819252 | Abcb4/Flrt  |
| GO_CC_m4GO:004445microtubul 4/714    | 149/23583 | 0.664285 | 0.833673 | 0.819252 | Cep152/Ce   |
| GO_CC_m4GO:003125cell leading 10/714 | 364/23583 | 0.66677  | 0.833673 | 0.819252 | Ctnna1/Frn  |
| GO_CC_m4GO:000580trans-Golg 5/714    | 186/23583 | 0.667312 | 0.833673 | 0.819252 | 5330417C2   |
| GO_CC_m4GO:003204small-subu 1/714    | 36/23583  | 0.669653 | 0.833673 | 0.819252 | Krr1        |
| GO_CC_m4GO:005503recycling e 1/714   | 36/23583  | 0.669653 | 0.833673 | 0.819252 | Ehd4        |
| GO_CC_m4GO:199039DNA repair 1/714    | 36/23583  | 0.669653 | 0.833673 | 0.819252 | Xpa         |
| GO_CC_m4GO:000175photorecep 2/714    | 76/23583  | 0.674454 | 0.833673 | 0.819252 | Gnat1/Prph  |
| GO_CC_m4GO:004485plasma me 3/714     | 114/23583 | 0.674954 | 0.833673 | 0.819252 | Ctnna1/Mlr  |
| GO_CC_m4GO:003130integral coi 1/714  | 37/23583  | 0.67967  | 0.833673 | 0.819252 | Chchd6      |
| GO_CC_m4GO:009963postsynapt 1/714    | 37/23583  | 0.67967  | 0.833673 | 0.819252 | Grm1        |
| GO_CC_m4GO:000593axoneme 3/714       | 115/23583 | 0.680677 | 0.833673 | 0.819252 | Casc1/Cccl  |
| GO_CC_m4GO:000077chromosom 5/714     | 189/23583 | 0.680918 | 0.833673 | 0.819252 | Cenps/Aurl  |
| GO_CC_m4GO:009706synaptic m 9/714    | 334/23583 | 0.684905 | 0.833673 | 0.819252 | Arc/Arhgap  |
| GO_CC_m4GO:009701ciliary plas 3/714  | 116/23583 | 0.686326 | 0.833673 | 0.819252 | Casc1/Cccl  |
| GO_CC_m4GO:004273presynaptic 2/714   | 78/23583  | 0.688239 | 0.833673 | 0.819252 | Grm1/Rims   |
| GO_CC_m4GO:004238sarcolemm 4/714     | 154/23583 | 0.689317 | 0.833673 | 0.819252 | Car4/Sgcb   |
| GO_CC_m4GO:000079euchromat 1/714     | 38/23583  | 0.689384 | 0.833673 | 0.819252 | Vdr         |
| GO_CC_m4GO:003017integral coi 1/714  | 38/23583  | 0.689384 | 0.833673 | 0.819252 | Bet1l       |
| GO_CC_m4GO:003130intrinsic coi 1/714 | 38/23583  | 0.689384 | 0.833673 | 0.819252 | Chchd6      |
| GO_CC_m4GO:009754ciliary base 1/714  | 38/23583  | 0.689384 | 0.833673 | 0.819252 | Nphp1       |
| GO_CC_m4GO:000576lysosomal r 3/714   | 118/23583 | 0.697398 | 0.839814 | 0.825287 | Sec13/Tpcc  |
| GO_CC_m4GO:009885lytic vacuol 3/714  | 118/23583 | 0.697398 | 0.839814 | 0.825287 | Sec13/Tpcc  |
| GO_CC_m4GO:004367axon termin 5/714   | 194/23583 | 0.702754 | 0.840403 | 0.825866 | Cacna1b/lt  |
| GO_CC_m4GO:000015nuclear ubi 1/714   | 40/23583  | 0.707937 | 0.840403 | 0.825866 | Anapc2      |
| GO_CC_m4GO:003122intrinsic coi 1/714 | 40/23583  | 0.707937 | 0.840403 | 0.825866 | Bet1l       |
| GO_CC_m4GO:006007excitatory e 1/714  | 40/23583  | 0.707937 | 0.840403 | 0.825866 | Slc17a8     |
| GO_CC_m4GO:004430main axon 2/714     | 81/23583  | 0.708012 | 0.840403 | 0.825866 | Sptan1/Tia  |
| GO_CC_m4GO:009880respiratory 2/714   | 81/23583  | 0.708012 | 0.840403 | 0.825866 | Ndufb10/N   |
| GO_CC_m4GO:004319terminal bc 3/714   | 120/23583 | 0.708172 | 0.840403 | 0.825866 | Itsn1/Syn1  |
| GO_CC_m4GO:000574mitochond 2/714     | 82/23583  | 0.714367 | 0.841932 | 0.827368 | Ndufb10/N   |
| GO_CC_m4GO:000579Golgi stack 2/714   | 82/23583  | 0.714367 | 0.841932 | 0.827368 | Bet1l/H2-C  |
| GO_CC_m4GO:003197organelle e 2/714   | 82/23583  | 0.714367 | 0.841932 | 0.827368 | Ak3/Cyca    |
| GO_CC_m4GO:009856cytoplasmic 5/714   | 197/23583 | 0.715348 | 0.841932 | 0.827368 | Gnat1/Gng   |
| GO_CC_m4GO:003002lamellipodi 4/714   | 160/23583 | 0.717572 | 0.842816 | 0.828236 | Ctnna1/Itsr |
| GO_CC_m4GO:003243actin filame 2/714  | 83/23583  | 0.720605 | 0.842985 | 0.828403 | Myl12a/Syr  |
| GO_CC_m4GO:009885actin-base 5/714    | 199/23583 | 0.723531 | 0.842985 | 0.828403 | Car2/Erbp2  |
| GO_CC_m4GO:000577peroxisom 1/714     | 42/23583  | 0.725384 | 0.842985 | 0.828403 | Pex1        |
| GO_CC_m4GO:003190microbody 1/714     | 42/23583  | 0.725384 | 0.842985 | 0.828403 | Pex1        |
| GO_CC_m4GO:190256H4 histone 1/714    | 42/23583  | 0.725384 | 0.842985 | 0.828403 | Dr1         |
| GO_CC_m4GO:003283plasma me 4/714     | 162/23583 | 0.726559 | 0.842985 | 0.828403 | Abhd13/Ca   |

|                                              |           |          |          |          |             |
|----------------------------------------------|-----------|----------|----------|----------|-------------|
| GO_CC_m4GO:004264actomyosin 2/714            | 85/23583  | 0.732736 | 0.847846 | 0.83318  | Myl12a/Syr  |
| GO_CC_m4GO:000580cis-Golgi network 1/714     | 43/23583  | 0.733713 | 0.847846 | 0.83318  | Tmed10      |
| GO_CC_m4GO:001636nuclear matrix 2/714        | 87/23583  | 0.744417 | 0.857568 | 0.842733 | Sfpq/Vdr    |
| GO_CC_m4GO:000828protein serine 1/714        | 45/23583  | 0.749622 | 0.857568 | 0.842733 | Ppp1r15b    |
| GO_CC_m4GO:001045cytoplasmic 1/714           | 45/23583  | 0.749622 | 0.857568 | 0.842733 | Grb7        |
| GO_CC_m4GO:012011neuron process 1/714        | 45/23583  | 0.749622 | 0.857568 | 0.842733 | Abhd13      |
| GO_CC_m4GO:190329phosphatase 1/714           | 45/23583  | 0.749622 | 0.857568 | 0.842733 | Ppp1r15b    |
| GO_CC_m4GO:007046respiratory chain 2/714     | 89/23583  | 0.755657 | 0.859381 | 0.844515 | Ndufb10/N   |
| GO_CC_m4GO:000574mitochondrial 4/714         | 169/23583 | 0.75633  | 0.859381 | 0.844515 | Cstad/Cyb5  |
| GO_CC_m4GO:003190late endosome 1/714         | 46/23583  | 0.757217 | 0.859381 | 0.844515 | Vamp8       |
| GO_CC_m4GO:006017ciliary membrane 1/714      | 46/23583  | 0.757217 | 0.859381 | 0.844515 | Tmem231     |
| GO_CC_m4GO:000079heterochromatin 2/714       | 90/23583  | 0.761116 | 0.862095 | 0.847182 | Cbx5/Vdr    |
| GO_CC_m4GO:000166acrosomal 3/714             | 134/23583 | 0.775445 | 0.87659  | 0.861427 | Atp6v1e2/C  |
| GO_CC_m4GO:000191photoreceptor 1/714         | 49/23583  | 0.778649 | 0.877957 | 0.86277  | Gnat1       |
| GO_CC_m4GO:005502nuclear DNA 3/714           | 135/23583 | 0.779724 | 0.877957 | 0.86277  | Polr1e/Polr |
| GO_CC_m4GO:004481DNA packaging 2/714         | 94/23583  | 0.781904 | 0.878682 | 0.863482 | Hp1bp3/N    |
| GO_CC_m4GO:000042DNA-direction 3/714         | 136/23583 | 0.783936 | 0.879238 | 0.864028 | Polr1e/Polr |
| GO_CC_m4GO:007268mitotic spindle 2/714       | 95/23583  | 0.786847 | 0.87947  | 0.864256 | Aurka/Rps3  |
| GO_CC_m4GO:000577vacuolar membrane 4/714     | 177/23583 | 0.787218 | 0.87947  | 0.864256 | Sec13/Stx1  |
| GO_CC_m4GO:003012vesicle coat 1/714          | 51/23583  | 0.791877 | 0.881547 | 0.866297 | Sec13       |
| GO_CC_m4GO:003088RNA polymerase 3/714        | 138/23583 | 0.792159 | 0.881547 | 0.866297 | Polr1e/Polr |
| GO_CC_m4GO:004323receptor core 9/714         | 374/23583 | 0.80173  | 0.890466 | 0.875062 | Bcl10/ErbB  |
| GO_CC_m4GO:003011membrane 2/714              | 99/23583  | 0.805644 | 0.891351 | 0.875932 | Ap1s3/Sec   |
| GO_CC_m4GO:004847coated membrane 2/714       | 99/23583  | 0.805644 | 0.891351 | 0.875932 | Ap1s3/Sec   |
| GO_CC_m4GO:009879mitochondrial 6/714         | 262/23583 | 0.808236 | 0.892493 | 0.877054 | Atp5c1/Ch   |
| GO_CC_m4GO:000802transcription 1/714         | 54/23583  | 0.810253 | 0.892996 | 0.877548 | Nelfe       |
| GO_CC_m4GO:000079condensed 4/714             | 185/23583 | 0.8149   | 0.89639  | 0.880884 | Aurka/Hus   |
| GO_CC_m4GO:001986outer membrane 4/714        | 187/23583 | 0.821341 | 0.898292 | 0.882753 | Cstad/Cyb5  |
| GO_CC_m4GO:003196organelle core 4/714        | 187/23583 | 0.821341 | 0.898292 | 0.882753 | Cstad/Cyb5  |
| GO_CC_m4GO:004443vacuolar permeability 4/714 | 187/23583 | 0.821341 | 0.898292 | 0.882753 | Sec13/Stx1  |
| GO_CC_m4GO:000560basement membrane 2/714     | 103/23583 | 0.822953 | 0.898338 | 0.882798 | Hmcn2/Vw    |
| GO_CC_m4GO:004443microbody 1/714             | 57/23583  | 0.827009 | 0.899333 | 0.883776 | Pex1        |
| GO_CC_m4GO:004443peroxisome 1/714            | 57/23583  | 0.827009 | 0.899333 | 0.883776 | Pex1        |
| GO_CC_m4GO:003242stereocilia 1/714           | 58/23583  | 0.832259 | 0.903325 | 0.887699 | Tiam1       |
| GO_CC_m4GO:000079chromosome 2/714            | 106/23583 | 0.835013 | 0.904597 | 0.888949 | Cbx5/Thoc   |
| GO_CC_m4GO:003196Golgi cisterna 1/714        | 59/23583  | 0.83735  | 0.904654 | 0.889004 | H2-Q10      |
| GO_CC_m4GO:000079nuclear chromosome 9/714    | 390/23583 | 0.838228 | 0.904654 | 0.889004 | Cbx5/Max    |
| GO_CC_m4GO:000011histone deacetylation 1/714 | 61/23583  | 0.847074 | 0.912479 | 0.896694 | Cbx5        |
| GO_CC_m4GO:001659DNA-direction 2/714         | 110/23583 | 0.849937 | 0.913842 | 0.898034 | Polr2m/Re   |
| GO_CC_m4GO:001652sarcolemma 1/714            | 65/23583  | 0.864815 | 0.928094 | 0.912039 | Car4        |
| GO_CC_m4GO:003439nuclear periphery 2/714     | 117/23583 | 0.873126 | 0.935258 | 0.91908  | Sfpq/Vdr    |
| GO_CC_m4GO:003215cell division 1/714         | 69/23583  | 0.8805   | 0.935552 | 0.919368 | 12-Sep      |
| GO_CC_m4GO:003470cation channel 4/714        | 209/23583 | 0.880658 | 0.935552 | 0.919368 | Cacna1b/C   |
| GO_CC_m4GO:000989external signal 11/714      | 491/23583 | 0.881192 | 0.935552 | 0.919368 | Ager/Btn2a  |
| GO_CC_m4GO:009868chromosome 6/714            | 293/23583 | 0.88157  | 0.935552 | 0.919368 | Cenps/Aurl  |
| GO_CC_m4GO:000093P-body 1/714                | 70/23583  | 0.884128 | 0.935552 | 0.919368 | Zfp36l1     |
| GO_CC_m4GO:000577autophagosome 1/714         | 70/23583  | 0.884128 | 0.935552 | 0.919368 | Stx17       |
| GO_CC_m4GO:000588actin filament 2/714        | 121/23583 | 0.884849 | 0.935552 | 0.919368 | Ackr2/Wipi  |

|                                      |           |          |          |          |             |
|--------------------------------------|-----------|----------|----------|----------|-------------|
| GO_CC_m4GO:190249transmembr6/714     | 296/23583 | 0.887218 | 0.936326 | 0.920129 | Atp1b4/Ca   |
| GO_CC_m4GO:001652sarcoplasmr1/714    | 74/23583  | 0.897575 | 0.943449 | 0.927129 | Car4        |
| GO_CC_m4GO:199035transporter6/714    | 303/23583 | 0.899515 | 0.943449 | 0.927129 | Atp1b4/Ca   |
| GO_CC_m4GO:000079synaptoner2/714     | 127/23583 | 0.900565 | 0.943449 | 0.927129 | Polb/Syn1   |
| GO_CC_m4GO:009908synaptoner2/714     | 127/23583 | 0.900565 | 0.943449 | 0.927129 | Polb/Syn1   |
| GO_CC_m4GO:003017integral coil2/714  | 130/23583 | 0.907651 | 0.948576 | 0.932167 | Atf6b/Rtn4  |
| GO_CC_m4GO:003646cytoplasmic3/714    | 178/23583 | 0.908776 | 0.948576 | 0.932167 | Grb7/Tuba   |
| GO_CC_m4GO:003049midbody 2/714       | 132/23583 | 0.912109 | 0.948702 | 0.932291 | Mtcl1/Sept  |
| GO_CC_m4GO:000012histone acetyl1/714 | 79/23583  | 0.912214 | 0.948702 | 0.932291 | Dr1         |
| GO_CC_m4GO:003122intrinsic coil2/714 | 136/23583 | 0.920427 | 0.953863 | 0.937363 | Atf6b/Rtn4  |
| GO_CC_m4GO:006169transferase5/714    | 275/23583 | 0.921957 | 0.953863 | 0.937363 | Polr1e/Polr |
| GO_CC_m4GO:000807voltage-gate1/714   | 84/23583  | 0.924763 | 0.953863 | 0.937363 | Kcne1       |
| GO_CC_m4GO:003577ribonucleo3/714     | 188/23583 | 0.926635 | 0.953863 | 0.937363 | Grb7/Tuba   |
| GO_CC_m4GO:000078nucleosom1/714      | 86/23583  | 0.929265 | 0.953863 | 0.937363 | Hp1bp3      |
| GO_CC_m4GO:003017filopodium1/714     | 87/23583  | 0.931415 | 0.953863 | 0.937363 | Spata13     |
| GO_CC_m4GO:00347Cion channel5/714    | 282/23583 | 0.931435 | 0.953863 | 0.937363 | Cacna1b/C   |
| GO_CC_m4GO:000031organellar 1/714    | 89/23583  | 0.93552  | 0.953863 | 0.937363 | Mrps16      |
| GO_CC_m4GO:000576mitochond1/714      | 89/23583  | 0.93552  | 0.953863 | 0.937363 | Mrps16      |
| GO_CC_m4GO:003124protein acetyl1/714 | 89/23583  | 0.93552  | 0.953863 | 0.937363 | Dr1         |
| GO_CC_m4GO:190249acetyltrans1/714    | 89/23583  | 0.93552  | 0.953863 | 0.937363 | Dr1         |
| GO_CC_m4GO:000568spliceosom3/714     | 199/23583 | 0.942536 | 0.956385 | 0.939841 | Lgals3/Luc  |
| GO_CC_m4GO:003146cullin-RIN3/714     | 199/23583 | 0.942536 | 0.956385 | 0.939841 | Anapc2/Dc   |
| GO_CC_m4GO:00347Cpotassium 1/714     | 93/23583  | 0.943009 | 0.956385 | 0.939841 | Kcne1       |
| GO_CC_m4GO:000575mitochond4/714      | 253/23583 | 0.950129 | 0.9619   | 0.945261 | Ak3/Mrps1   |
| GO_CC_m4GO:007256blood micr2/714     | 156/23583 | 0.951999 | 0.962091 | 0.945448 | Apoa4/Igh   |
| GO_CC_m4GO:190291protein kin1/714    | 109/23583 | 0.965226 | 0.973738 | 0.956894 | Prkag1      |
| GO_CC_m4GO:00988Cplasma me2/714      | 175/23583 | 0.970629 | 0.977465 | 0.960556 | Bcl10/Grm   |
| GO_CC_m4GO:000581centrosom8/714      | 498/23583 | 0.984789 | 0.989981 | 0.972856 | Aurka/Cep   |
| GO_CC_m4GO:004257immunogl1/714       | 141/23583 | 0.987067 | 0.990304 | 0.973173 | Ighv9-4     |
| GO_CC_m4GO:001981immunogl1/714       | 145/23583 | 0.988573 | 0.990304 | 0.973173 | Ighv9-4     |
| GO_CC_m4GO:000015ubiquitin li3/714   | 340/23583 | 0.998141 | 0.998141 | 0.980874 | Anapc2/Dc   |
| GO_MF_m4GO:00050Ctransmembr7/2529    | 14/23049  | 0.000324 | 0.247529 | 0.238551 | Epha10/Ep   |
| GO_MF_m4GO:001984vitamin bin28/2529  | 133/23049 | 0.000515 | 0.247529 | 0.238551 | Abat/Akr1k  |
| GO_MF_m4GO:001685isomerase 30/2529   | 147/23049 | 0.000576 | 0.247529 | 0.238551 | Bpgm/Dct/   |
| GO_MF_m4GO:001674transferase39/2529  | 211/23049 | 0.000775 | 0.247529 | 0.238551 | 6430573F1   |
| GO_MF_m4GO:001048H4 histone8/2529    | 20/23049  | 0.000775 | 0.247529 | 0.238551 | Nat8f3/Hat  |
| GO_MF_m4GO:00050Cephrin rece7/2529   | 16/23049  | 0.000884 | 0.247529 | 0.238551 | Epha10/Ep   |
| GO_MF_m4GO:000816methyltran37/2529   | 199/23049 | 0.00093  | 0.247529 | 0.238551 | 6430573F1   |
| GO_MF_m4GO:000452exonucleas17/2529   | 70/23049  | 0.001218 | 0.247529 | 0.238551 | Aplf/Aptx/I |
| GO_MF_m4GO:000408bisphosph3/2529     | 3/23049   | 0.00132  | 0.247529 | 0.238551 | Bpgm/Pgai   |
| GO_MF_m4GO:000461phosphogl3/2529     | 3/23049   | 0.00132  | 0.247529 | 0.238551 | Bpgm/Pgai   |
| GO_MF_m4GO:0046532,3-bispho3/2529    | 3/23049   | 0.00132  | 0.247529 | 0.238551 | Bpgm/Pgai   |
| GO_MF_m4GO:000875S-adenosy29/2529    | 148/23049 | 0.001378 | 0.247529 | 0.238551 | As3mt/Ash   |
| GO_MF_m4GO:009952G-protein 12/2529   | 43/23049  | 0.001756 | 0.291044 | 0.280488 | Chrm1/Chr   |
| GO_MF_m4GO:005066coenzyme 47/2529    | 281/23049 | 0.002194 | 0.337643 | 0.325397 | Abat/Acad   |
| GO_MF_m4GO:00046Cglutathione7/2529   | 20/23049  | 0.004038 | 0.4122   | 0.397251 | Gpx1/Gpx2   |
| GO_MF_m4GO:005121dioxygenas19/2529   | 91/23049  | 0.004204 | 0.4122   | 0.397251 | 6430573F1   |
| GO_MF_m4GO:000817RNA methyl14/2529   | 60/23049  | 0.004696 | 0.4122   | 0.397251 | 6430573F1   |

|                                                               |           |          |        |          |             |
|---------------------------------------------------------------|-----------|----------|--------|----------|-------------|
| GO_MF_m:GO:007040 ammonium 17/2529                            | 79/23049  | 0.004772 | 0.4122 | 0.397251 | Ache/Acpp   |
| GO_MF_m:GO:000017 rRNA (ader) 3/2529                          | 4/23049   | 0.004844 | 0.4122 | 0.397251 | Gm1818/Tf   |
| GO_MF_m:GO:005022 prostaglandin 3/2529                        | 4/23049   | 0.004844 | 0.4122 | 0.397251 | Mgst1/Ptg   |
| GO_MF_m:GO:003418 apolipoprotein 6/2529                       | 16/23049  | 0.005242 | 0.4122 | 0.397251 | Canx/Lrp4/  |
| GO_MF_m:GO:000460 peroxidase 11/2529                          | 43/23049  | 0.005601 | 0.4122 | 0.397251 | Gpx1/Gpx2   |
| GO_MF_m:GO:003059 neurotransmitter 22/2529                    | 114/23049 | 0.005916 | 0.4122 | 0.397251 | Adra1d/Ch   |
| GO_MF_m:GO:004301 alpha-tubulin 9/2529                        | 32/23049  | 0.006087 | 0.4122 | 0.397251 | 1110017D1   |
| GO_MF_m:GO:000486 cyclin-dependent 5/2529                     | 12/23049  | 0.006462 | 0.4122 | 0.397251 | Cdkn1a/Cc   |
| GO_MF_m:GO:004349 protein methyltransferase 5/2529            | 12/23049  | 0.006462 | 0.4122 | 0.397251 | Akap6/Cib   |
| GO_MF_m:GO:000817 N-methyltransferase 18/2529                 | 88/23049  | 0.006556 | 0.4122 | 0.397251 | Ash2l/Eef2l |
| GO_MF_m:GO:001670 oxidoreductase 11/2529                      | 45/23049  | 0.008058 | 0.4122 | 0.397251 | 6430573F1   |
| GO_MF_m:GO:003029 protein serine/threonine kinase 8/2529      | 28/23049  | 0.008606 | 0.4122 | 0.397251 | Cdkn1a/Cc   |
| GO_MF_m:GO:000822 G-protein-coupled 15/2529                   | 71/23049  | 0.009214 | 0.4122 | 0.397251 | Adra1d/Ch   |
| GO_MF_m:GO:001679 phosphatase 42/2529                         | 265/23049 | 0.009372 | 0.4122 | 0.397251 | Acp6/Acpp   |
| GO_MF_m:GO:005510 ubiquitin-protein ligase 6/2529             | 18/23049  | 0.010029 | 0.4122 | 0.397251 | Cdc20/Fbx   |
| GO_MF_m:GO:000411 creatine kinase 3/2529                      | 5/23049   | 0.011121 | 0.4122 | 0.397251 | Ckm/Ckmt    |
| GO_MF_m:GO:001038 double-strand break repair 3/2529           | 5/23049   | 0.011121 | 0.4122 | 0.397251 | H2afy/Mbc   |
| GO_MF_m:GO:003524 protein-argininase 3/2529                   | 5/23049   | 0.011121 | 0.4122 | 0.397251 | Prmt1/Prm   |
| GO_MF_m:GO:001668 oxidoreductase 11/2529                      | 47/23049  | 0.011279 | 0.4122 | 0.397251 | Gpx1/Gpx2   |
| GO_MF_m:GO:003141 cobalamin 4/2529                            | 9/23049   | 0.011564 | 0.4122 | 0.397251 | Gif/Mmab/   |
| GO_MF_m:GO:004662 sphingolipid 4/2529                         | 9/23049   | 0.011564 | 0.4122 | 0.397251 | Abcb1a/Plt  |
| GO_MF_m:GO:000028 magnesium 31/2529                           | 186/23049 | 0.011807 | 0.4122 | 0.397251 | Abl2/Atp8k  |
| GO_MF_m:GO:000205 uracil binding 2/2529                       | 2/23049   | 0.012035 | 0.4122 | 0.397251 | Dpyd/Dpys   |
| GO_MF_m:GO:000206 pyrimidine 2/2529                           | 2/23049   | 0.012035 | 0.4122 | 0.397251 | Dpyd/Dpys   |
| GO_MF_m:GO:000385 3-hydroxylation 2/2529                      | 2/23049   | 0.012035 | 0.4122 | 0.397251 | Bdh1/Bdh2   |
| GO_MF_m:GO:000399 acetylcholine 2/2529                        | 2/23049   | 0.012035 | 0.4122 | 0.397251 | Ache/Bche   |
| GO_MF_m:GO:000460 phosphatase 2/2529                          | 2/23049   | 0.012035 | 0.4122 | 0.397251 | Got1/Pisd   |
| GO_MF_m:GO:000816 protein tyrosine kinase 2/2529              | 2/23049   | 0.012035 | 0.4122 | 0.397251 | Igfbp3/Ptp  |
| GO_MF_m:GO:003061 transformin 2/2529                          | 2/23049   | 0.012035 | 0.4122 | 0.397251 | Smad6/Sm    |
| GO_MF_m:GO:003390 hyaluronan 2/2529                           | 2/23049   | 0.012035 | 0.4122 | 0.397251 | Hyal2/Hyal  |
| GO_MF_m:GO:003418 very-low-density lipoprotein 2/2529         | 2/23049   | 0.012035 | 0.4122 | 0.397251 | Pcsk9/Vldlr |
| GO_MF_m:GO:004775 chondroitin 2/2529                          | 2/23049   | 0.012035 | 0.4122 | 0.397251 | Dse/Dsel    |
| GO_MF_m:GO:005264 lysophospholipid 2/2529                     | 2/23049   | 0.012035 | 0.4122 | 0.397251 | Acp6/Acpp   |
| GO_MF_m:GO:009736 protein O-linked N-acetylglucosamine 2/2529 | 2/23049   | 0.012035 | 0.4122 | 0.397251 | Ogt/Pomg    |
| GO_MF_m:GO:199019 peptide-glycine 2/2529                      | 2/23049   | 0.012035 | 0.4122 | 0.397251 | Naa10/Naa   |
| GO_MF_m:GO:000470 MAP kinase 16/2529                          | 80/23049  | 0.012393 | 0.4122 | 0.397251 | Epha10/Ep   |
| GO_MF_m:GO:003421 peptide N-linked glycosylation 14/2529      | 67/23049  | 0.012812 | 0.4122 | 0.397251 | Clock/Nat8  |
| GO_MF_m:GO:000493 G-protein-coupled 8/2529                    | 30/23049  | 0.013299 | 0.4122 | 0.397251 | Olfr1564/H  |
| GO_MF_m:GO:009958 serotonin receptor 8/2529                   | 30/23049  | 0.013299 | 0.4122 | 0.397251 | Olfr1564/H  |
| GO_MF_m:GO:000495 dopamine 5/2529                             | 14/23049  | 0.013551 | 0.4122 | 0.397251 | Adra1d/Dro  |
| GO_MF_m:GO:000509 GDP-dissociation inhibitor 5/2529           | 14/23049  | 0.013551 | 0.4122 | 0.397251 | Arhgdib/G   |
| GO_MF_m:GO:000825 nucleotide 5/2529                           | 14/23049  | 0.013551 | 0.4122 | 0.397251 | Acpp/Bpnt   |
| GO_MF_m:GO:001620 antioxidant 16/2529                         | 81/23049  | 0.013914 | 0.4122 | 0.397251 | Gpx1/Gpx2   |
| GO_MF_m:GO:000808 N-acetylation 17/2529                       | 88/23049  | 0.014231 | 0.4122 | 0.397251 | Clock/Nat8  |
| GO_MF_m:GO:001640 acetyltransferase 20/2529                   | 109/23049 | 0.014516 | 0.4122 | 0.397251 | Clock/Nat8  |
| GO_MF_m:GO:001563 tubulin binding 47/2529                     | 311/23049 | 0.014637 | 0.4122 | 0.397251 | 1110017D1   |
| GO_MF_m:GO:004257 phosphoric acid 52/2529                     | 351/23049 | 0.015369 | 0.4122 | 0.397251 | Acp6/Acpp   |
| GO_MF_m:GO:001921 kinase inhibitor 17/2529                    | 89/23049  | 0.015845 | 0.4122 | 0.397251 | Camk2n1/C   |

|                                 |         |           |          |        |          |             |
|---------------------------------|---------|-----------|----------|--------|----------|-------------|
| GO_MF_mf:GO:000837acetylglucc   | 12/2529 | 56/23049  | 0.016784 | 0.4122 | 0.397251 | A4gnt/B3g   |
| GO_MF_mf:GO:000864rRNA meth     | 6/2529  | 20/23049  | 0.0173   | 0.4122 | 0.397251 | Ftsj3/Gm18  |
| GO_MF_mf:GO:01401C catalytic ac | 6/2529  | 20/23049  | 0.0173   | 0.4122 | 0.397251 | Ftsj3/Gm18  |
| GO_MF_mf:GO:000804enzyme ac     | 63/2529 | 441/23049 | 0.017496 | 0.4122 | 0.397251 | 1700006A1   |
| GO_MF_mf:GO:001686intramolec    | 4/2529  | 10/23049  | 0.017619 | 0.4122 | 0.397251 | Bpgm/Pgai   |
| GO_MF_mf:GO:004399histone ac    | 4/2529  | 10/23049  | 0.017619 | 0.4122 | 0.397251 | Kansl1/Kan  |
| GO_MF_mf:GO:004399histone ac    | 4/2529  | 10/23049  | 0.017619 | 0.4122 | 0.397251 | Kansl1/Kan  |
| GO_MF_mf:GO:004697histone ac    | 4/2529  | 10/23049  | 0.017619 | 0.4122 | 0.397251 | Kansl1/Kan  |
| GO_MF_mf:GO:190161phosphatic    | 4/2529  | 10/23049  | 0.017619 | 0.4122 | 0.397251 | Atp8b1/Ck   |
| GO_MF_mf:GO:004803quinone bi    | 5/2529  | 15/23049  | 0.018522 | 0.4122 | 0.397251 | Aoc1/Aoc3   |
| GO_MF_mf:GO:00084C 3'-5' exon   | 10/2529 | 44/23049  | 0.018758 | 0.4122 | 0.397251 | Aplf/Noct/  |
| GO_MF_mf:GO:001686intramolec    | 7/2529  | 26/23049  | 0.019081 | 0.4122 | 0.397251 | Bpgm/Mut    |
| GO_MF_mf:GO:001662oxidoreduc    | 12/2529 | 57/23049  | 0.019199 | 0.4122 | 0.397251 | Acad11/Bd   |
| GO_MF_mf:GO:001682lyase activi  | 29/2529 | 178/23049 | 0.019366 | 0.4122 | 0.397251 | Dglucy/Ad   |
| GO_MF_mf:GO:001641N-acyltran    | 19/2529 | 105/23049 | 0.019395 | 0.4122 | 0.397251 | Cers3/Cers  |
| GO_MF_mf:GO:001653cyclin-depr   | 8/2529  | 32/23049  | 0.019627 | 0.4122 | 0.397251 | Ccne1/Ccn   |
| GO_MF_mf:GO:000451nuclease ar   | 32/2529 | 201/23049 | 0.019931 | 0.4122 | 0.397251 | Aplf/Aptx/I |
| GO_MF_mf:GO:00004CY-form DN     | 3/2529  | 6/23049   | 0.020436 | 0.4122 | 0.397251 | Blm/Men1/   |
| GO_MF_mf:GO:000205nucleobase    | 3/2529  | 6/23049   | 0.020436 | 0.4122 | 0.397251 | Aprt/Dpyd   |
| GO_MF_mf:GO:000476stearoyl-C    | 3/2529  | 6/23049   | 0.020436 | 0.4122 | 0.397251 | Cyb5a/Fad   |
| GO_MF_mf:GO:000485phospholip    | 3/2529  | 6/23049   | 0.020436 | 0.4122 | 0.397251 | Angptl3/Ar  |
| GO_MF_mf:GO:001643rRNA (ader    | 3/2529  | 6/23049   | 0.020436 | 0.4122 | 0.397251 | Gm1818/Ti   |
| GO_MF_mf:GO:00169CG-protein     | 3/2529  | 6/23049   | 0.020436 | 0.4122 | 0.397251 | Chrm1/Chr   |
| GO_MF_mf:GO:003326choline bin   | 3/2529  | 6/23049   | 0.020436 | 0.4122 | 0.397251 | Ache/Acpp   |
| GO_MF_mf:GO:003419apolipopro    | 3/2529  | 6/23049   | 0.020436 | 0.4122 | 0.397251 | Abca12/Nr   |
| GO_MF_mf:GO:001686intramolec    | 11/2529 | 51/23049  | 0.020556 | 0.4122 | 0.397251 | Dct/Ddt/Ec  |
| GO_MF_mf:GO:00167C oxidoreduc   | 32/2529 | 202/23049 | 0.021269 | 0.4122 | 0.397251 | 6430573F1   |
| GO_MF_mf:GO:004801receptor li   | 68/2529 | 486/23049 | 0.021402 | 0.4122 | 0.397251 | Adm/Amb     |
| GO_MF_mf:GO:003107heat shock    | 23/2529 | 135/23049 | 0.021497 | 0.4122 | 0.397251 | Adora1/Ar   |
| GO_MF_mf:GO:001709AU-rich ele   | 7/2529  | 27/23049  | 0.023384 | 0.4122 | 0.397251 | Apobec1/C   |
| GO_MF_mf:GO:00011C RNA polyn    | 8/2529  | 33/23049  | 0.023485 | 0.4122 | 0.397251 | Bbs10/Bbs   |
| GO_MF_mf:GO:000486protein kin   | 16/2529 | 86/23049  | 0.023805 | 0.4122 | 0.397251 | Camk2n1/C   |
| GO_MF_mf:GO:006173peptide-ly    | 12/2529 | 59/23049  | 0.024792 | 0.4122 | 0.397251 | Clock/Nat8  |
| GO_MF_mf:GO:001627arginine N-   | 4/2529  | 11/23049  | 0.025322 | 0.4122 | 0.397251 | Ndufaf7/Pr  |
| GO_MF_mf:GO:001627protein-ar    | 4/2529  | 11/23049  | 0.025322 | 0.4122 | 0.397251 | Ndufaf7/Pr  |
| GO_MF_mf:GO:003098mismatche     | 4/2529  | 11/23049  | 0.025322 | 0.4122 | 0.397251 | Aptx/Msh3   |
| GO_MF_mf:GO:00055C iron ion bir | 28/2529 | 175/23049 | 0.026401 | 0.4122 | 0.397251 | 6430573F1   |
| GO_MF_mf:GO:001674transferase   | 34/2529 | 221/23049 | 0.026729 | 0.4122 | 0.397251 | Acsm5/Ag    |
| GO_MF_mf:GO:01401C catalytic ac | 6/2529  | 22/23049  | 0.027544 | 0.4122 | 0.397251 | Abo/B3gnt   |
| GO_MF_mf:GO:190133catecholan    | 6/2529  | 22/23049  | 0.027544 | 0.4122 | 0.397251 | Adra1d/Dri  |
| GO_MF_mf:GO:00314C carboxylic   | 33/2529 | 214/23049 | 0.027867 | 0.4122 | 0.397251 | 2300002M    |
| GO_MF_mf:GO:000368damaged [     | 12/2529 | 60/23049  | 0.027997 | 0.4122 | 0.397251 | Aptx/Blm/E  |
| GO_MF_mf:GO:004216neurotrans    | 12/2529 | 60/23049  | 0.027997 | 0.4122 | 0.397251 | Ache/Acpp   |
| GO_MF_mf:GO:000453exoribonuc    | 7/2529  | 28/23049  | 0.02831  | 0.4122 | 0.397251 | Noct/Cnot   |
| GO_MF_mf:GO:000806growth fac    | 24/2529 | 146/23049 | 0.028347 | 0.4122 | 0.397251 | Ambn/Ang    |
| GO_MF_mf:GO:000509GTPase act    | 37/2529 | 246/23049 | 0.029512 | 0.4122 | 0.397251 | 1700006A1   |
| GO_MF_mf:GO:004848beta-tubul    | 9/2529  | 41/23049  | 0.030995 | 0.4122 | 0.397251 | Bcas3/Fgf1  |
| GO_MF_mf:GO:000471transmem      | 12/2529 | 61/23049  | 0.031492 | 0.4122 | 0.397251 | Epha10/Ep   |

|                    |              |         |           |          |        |          |             |
|--------------------|--------------|---------|-----------|----------|--------|----------|-------------|
| GO_MF_mf:GO:003069 | GTPase reg   | 39/2529 | 263/23049 | 0.031716 | 0.4122 | 0.397251 | 1700006A1   |
| GO_MF_mf:GO:000840 | 5' -3' exon  | 5/2529  | 17/23049  | 0.031725 | 0.4122 | 0.397251 | Aptx/Dclre  |
| GO_MF_mf:GO:003524 | dopamine     | 5/2529  | 17/23049  | 0.031725 | 0.4122 | 0.397251 | Adra1d/Dr   |
| GO_MF_mf:GO:000160 | G-protein    | 3/2529  | 7/23049   | 0.032876 | 0.4122 | 0.397251 | Adora1/Ox   |
| GO_MF_mf:GO:001621 | acyl-CoA     | 3/2529  | 7/23049   | 0.032876 | 0.4122 | 0.397251 | Cyb5a/Fad   |
| GO_MF_mf:GO:001987 | potassium    | 3/2529  | 7/23049   | 0.032876 | 0.4122 | 0.397251 | Cav1/Cav3   |
| GO_MF_mf:GO:003643 | K48-linked   | 3/2529  | 7/23049   | 0.032876 | 0.4122 | 0.397251 | Mindy2/Nf   |
| GO_MF_mf:GO:005510 | ubiquitin-f  | 3/2529  | 7/23049   | 0.032876 | 0.4122 | 0.397251 | Fbxo5/Glm   |
| GO_MF_mf:GO:000395 | NAD(P)H      | 2/2529  | 3/23049   | 0.033465 | 0.4122 | 0.397251 | Cbr4/Nqo1   |
| GO_MF_mf:GO:000410 | cholinester  | 2/2529  | 3/23049   | 0.033465 | 0.4122 | 0.397251 | Ache/Bche   |
| GO_MF_mf:GO:000417 | electron-tr  | 2/2529  | 3/23049   | 0.033465 | 0.4122 | 0.397251 | Aifm1/Aifm  |
| GO_MF_mf:GO:000816 | C-methyltr   | 2/2529  | 3/23049   | 0.033465 | 0.4122 | 0.397251 | Coq3/Nop    |
| GO_MF_mf:GO:000818 | glycogen     | p2/2529 | 3/23049   | 0.033465 | 0.4122 | 0.397251 | Pygb/Pygn   |
| GO_MF_mf:GO:000842 | calcium-de   | 2/2529  | 3/23049   | 0.033465 | 0.4122 | 0.397251 | Camk2n1/C   |
| GO_MF_mf:GO:001626 | protein N-   | 2/2529  | 3/23049   | 0.033465 | 0.4122 | 0.397251 | B3gnt8/Og   |
| GO_MF_mf:GO:001664 | oxidoreduc   | 2/2529  | 3/23049   | 0.033465 | 0.4122 | 0.397251 | Aifm1/Aifm  |
| GO_MF_mf:GO:001916 | trans-2-en   | 2/2529  | 3/23049   | 0.033465 | 0.4122 | 0.397251 | Decr2/Pecr  |
| GO_MF_mf:GO:001997 | interleukin  | 2/2529  | 3/23049   | 0.033465 | 0.4122 | 0.397251 | Il2rb/Il2rg |
| GO_MF_mf:GO:003033 | DNA polyn    | 2/2529  | 3/23049   | 0.033465 | 0.4122 | 0.397251 | Pcna/Tefm   |
| GO_MF_mf:GO:003117 | phosphop     | 2/2529  | 3/23049   | 0.033465 | 0.4122 | 0.397251 | Fasn/Zfp59  |
| GO_MF_mf:GO:003168 | A1 adenos    | 2/2529  | 3/23049   | 0.033465 | 0.4122 | 0.397251 | P2ry1/P2ry  |
| GO_MF_mf:GO:003213 | dinucleotid  | 2/2529  | 3/23049   | 0.033465 | 0.4122 | 0.397251 | Msh3/Pcna   |
| GO_MF_mf:GO:003419 | apolipopro   | 2/2529  | 3/23049   | 0.033465 | 0.4122 | 0.397251 | Abca12/Nr   |
| GO_MF_mf:GO:003585 | Krüppel-ε    | 2/2529  | 3/23049   | 0.033465 | 0.4122 | 0.397251 | Hdac1/Hda   |
| GO_MF_mf:GO:004312 | ErbB-3 clas  | 2/2529  | 3/23049   | 0.033465 | 0.4122 | 0.397251 | Cdk5/Nrg2   |
| GO_MF_mf:GO:199018 | peptide-se   | 2/2529  | 3/23049   | 0.033465 | 0.4122 | 0.397251 | Naa10/Na    |
| GO_MF_mf:GO:001662 | oxidoreduc   | 6/2529  | 23/23049  | 0.033905 | 0.4122 | 0.397251 | Bdh2/Decr   |
| GO_MF_mf:GO:003037 | translation  | 6/2529  | 23/23049  | 0.033905 | 0.4122 | 0.397251 | Cpeb3/Cpe   |
| GO_MF_mf:GO:007084 | dynein con   | 6/2529  | 23/23049  | 0.033905 | 0.4122 | 0.397251 | Dnaaf1/Fm   |
| GO_MF_mf:GO:000472 | protein tyr  | 17/2529 | 97/23049  | 0.034343 | 0.4122 | 0.397251 | Cdc25a/Dr   |
| GO_MF_mf:GO:000825 | 5' -nucleoti | 4/2529  | 12/23049  | 0.034751 | 0.4122 | 0.397251 | Acpp/Nt5c   |
| GO_MF_mf:GO:001678 | sulfurtransf | 4/2529  | 12/23049  | 0.034751 | 0.4122 | 0.397251 | Mocs2/Tst   |
| GO_MF_mf:GO:003107 | histone de   | 4/2529  | 12/23049  | 0.034751 | 0.4122 | 0.397251 | Hdac1/Hda   |
| GO_MF_mf:GO:003204 | NAD-depe     | 4/2529  | 12/23049  | 0.034751 | 0.4122 | 0.397251 | Hdac1/Hda   |
| GO_MF_mf:GO:004454 | S100 prote   | 4/2529  | 12/23049  | 0.034751 | 0.4122 | 0.397251 | Anxa2/Ezr   |
| GO_MF_mf:GO:007049 | repressing   | 12/2529 | 62/23049  | 0.03529  | 0.4122 | 0.397251 | Arntl/Bbs1  |
| GO_MF_mf:GO:000372 | double-str   | 14/2529 | 76/23049  | 0.035637 | 0.4122 | 0.397251 | Aptx/Ddx2   |
| GO_MF_mf:GO:004317 | organic aci  | 33/2529 | 219/23049 | 0.037182 | 0.4122 | 0.397251 | 2300002M:   |
| GO_MF_mf:GO:000402 | aldehyde     | d5/2529 | 18/23049  | 0.04007  | 0.4122 | 0.397251 | Adh5/Aldh   |
| GO_MF_mf:GO:000505 | signal tran  | 24/2529 | 151/23049 | 0.040206 | 0.4122 | 0.397251 | Cd19/Epha   |
| GO_MF_mf:GO:003519 | miRNA bin    | 6/2529  | 24/23049  | 0.041142 | 0.4122 | 0.397251 | Ddx21/Fmr   |
| GO_MF_mf:GO:004292 | neuropepti   | 6/2529  | 24/23049  | 0.041142 | 0.4122 | 0.397251 | Adcyap1r1   |
| GO_MF_mf:GO:006058 | nucleoside   | 43/2529 | 301/23049 | 0.043081 | 0.4122 | 0.397251 | 1700006A1   |
| GO_MF_mf:GO:000440 | histone ac   | 11/2529 | 57/23049  | 0.04353  | 0.4122 | 0.397251 | Clock/Nat8  |
| GO_MF_mf:GO:005128 | NAD bindir   | 12/2529 | 64/23049  | 0.043835 | 0.4122 | 0.397251 | Adh1/Aldh   |
| GO_MF_mf:GO:000392 | GTPase act   | 40/2529 | 278/23049 | 0.045092 | 0.4122 | 0.397251 | Arhgdib/Ar  |
| GO_MF_mf:GO:000809 | 5S rRNA bi   | 4/2529  | 13/23049  | 0.045946 | 0.4122 | 0.397251 | Mrpl18/Rp   |
| GO_MF_mf:GO:003154 | peptidyl-p   | 4/2529  | 13/23049  | 0.045946 | 0.4122 | 0.397251 | Egln3/Ogfc  |

|                                       |           |          |        |          |              |
|---------------------------------------|-----------|----------|--------|----------|--------------|
| GO_MF_mf:GO:007000serine-type4/2529   | 13/23049  | 0.045946 | 0.4122 | 0.397251 | Cpm/Cpvl/    |
| GO_MF_mf:GO:000801microtubul3/2529    | 223/23049 | 0.046194 | 0.4122 | 0.397251 | Cep350/Cg    |
| GO_MF_mf:GO:001679exonucleas9/2529    | 44/23049  | 0.046664 | 0.4122 | 0.397251 | Aptx/Noct/   |
| GO_MF_mf:GO:000470signal trans20/2529 | 123/23049 | 0.046826 | 0.4122 | 0.397251 | Epha10/Ep    |
| GO_MF_mf:GO:014009catalytic ac50/2529 | 360/23049 | 0.048043 | 0.4122 | 0.397251 | 6430573F1    |
| GO_MF_mf:GO:000107transcriptic3/2529  | 8/23049   | 0.048384 | 0.4122 | 0.397251 | Dach1/Taf4   |
| GO_MF_mf:GO:000804axon guida3/2529    | 8/23049   | 0.048384 | 0.4122 | 0.397251 | Epha7/Eph    |
| GO_MF_mf:GO:001519L-serine tr3/2529   | 8/23049   | 0.048384 | 0.4122 | 0.397251 | Serinc2/Sei  |
| GO_MF_mf:GO:001671oxidoreduc3/2529    | 8/23049   | 0.048384 | 0.4122 | 0.397251 | Cyb5a/Fad    |
| GO_MF_mf:GO:001688ligase activ3/2529  | 8/23049   | 0.048384 | 0.4122 | 0.397251 | Mccc2/Pcc.   |
| GO_MF_mf:GO:001689endoribont3/2529    | 8/23049   | 0.048384 | 0.4122 | 0.397251 | Rida/Tsen2   |
| GO_MF_mf:GO:002288serine tran3/2529   | 8/23049   | 0.048384 | 0.4122 | 0.397251 | Serinc2/Sei  |
| GO_MF_mf:GO:003524protein-ar3/2529    | 8/23049   | 0.048384 | 0.4122 | 0.397251 | Prmt1/Prm    |
| GO_MF_mf:GO:004291xenobiotic 3/2529   | 8/23049   | 0.048384 | 0.4122 | 0.397251 | Abcb1a/Ab    |
| GO_MF_mf:GO:190161cardiolipin 3/2529  | 8/23049   | 0.048384 | 0.4122 | 0.397251 | Atp8b1/Ck    |
| GO_MF_mf:GO:005084extracellula11/2529 | 58/23049  | 0.048601 | 0.4122 | 0.397251 | 2300002M:    |
| GO_MF_mf:GO:0000173'-5'-exori 6/2529  | 25/23049  | 0.049283 | 0.4122 | 0.397251 | Noct/Cnotf   |
| GO_MF_mf:GO:003558purinergic 6/2529   | 25/23049  | 0.049283 | 0.4122 | 0.397251 | Adora1/Hc    |
| GO_MF_mf:GO:000395NAD+ ADF5/2529      | 19/23049  | 0.049623 | 0.4122 | 0.397251 | Art1/Art5/F  |
| GO_MF_mf:GO:003016low-densit5/2529    | 19/23049  | 0.049623 | 0.4122 | 0.397251 | Cd36/Mptx    |
| GO_MF_mf:GO:003141L-ascorbic 5/2529   | 19/23049  | 0.049623 | 0.4122 | 0.397251 | Egln3/Ogfc   |
| GO_MF_mf:GO:003126small GTPa59/2529   | 435/23049 | 0.050771 | 0.4122 | 0.397251 | 1700123L1    |
| GO_MF_mf:GO:001677nucleotidyl21/2529  | 132/23049 | 0.05184  | 0.4122 | 0.397251 | Aptx/Ficd/C  |
| GO_MF_mf:GO:004748protein N-20/2529   | 126/23049 | 0.05779  | 0.4122 | 0.397251 | Akap6/Apt    |
| GO_MF_mf:GO:004339proteoglyc8/2529    | 39/23049  | 0.058012 | 0.4122 | 0.397251 | Col5a1/Gp    |
| GO_MF_mf:GO:005075low-densit6/2529    | 26/23049  | 0.058343 | 0.4122 | 0.397251 | Ankra2/Hsq   |
| GO_MF_mf:GO:0005541-phospha4/2529     | 14/23049  | 0.058904 | 0.4122 | 0.397251 | Epb41/Snx    |
| GO_MF_mf:GO:001674transferase36/2529  | 252/23049 | 0.059729 | 0.4122 | 0.397251 | Acsm5/Agp    |
| GO_MF_mf:GO:001683carbon-car10/2529   | 53/23049  | 0.060125 | 0.4122 | 0.397251 | Clybl/Ddt/l  |
| GO_MF_mf:GO:000021tRNA-intro2/2529    | 4/23049   | 0.062086 | 0.4122 | 0.397251 | Tsen2/Tser   |
| GO_MF_mf:GO:000158dopamine 2/2529     | 4/23049   | 0.062086 | 0.4122 | 0.397251 | Drd5/Gpr2    |
| GO_MF_mf:GO:000404aminoacyla2/2529    | 4/23049   | 0.062086 | 0.4122 | 0.397251 | Acy1/Acy3    |
| GO_MF_mf:GO:000416dodecenoy2/2529     | 4/23049   | 0.062086 | 0.4122 | 0.397251 | Eci2/Ehhad   |
| GO_MF_mf:GO:000417ATP-deper2/2529     | 4/23049   | 0.062086 | 0.4122 | 0.397251 | Clpx/Lonp2   |
| GO_MF_mf:GO:000452RNA-DNA 2/2529      | 4/23049   | 0.062086 | 0.4122 | 0.397251 | Fen1/Rnase   |
| GO_MF_mf:GO:000469eukaryotic 2/2529   | 4/23049   | 0.062086 | 0.4122 | 0.397251 | Eif2ak1/Eif2 |
| GO_MF_mf:GO:000479thiosulfate 2/2529  | 4/23049   | 0.062086 | 0.4122 | 0.397251 | Tst/Tstd3    |
| GO_MF_mf:GO:000517ErbB-2 clas2/2529   | 4/23049   | 0.062086 | 0.4122 | 0.397251 | Cdk5/Nrg1    |
| GO_MF_mf:GO:000531inorganic p2/2529   | 4/23049   | 0.062086 | 0.4122 | 0.397251 | Ank/Slc20a   |
| GO_MF_mf:GO:000894oxaloaceta2/2529    | 4/23049   | 0.062086 | 0.4122 | 0.397251 | Fahd1/Me3    |
| GO_MF_mf:GO:000937biotin bind2/2529   | 4/23049   | 0.062086 | 0.4122 | 0.397251 | Hlcs/Pcx     |
| GO_MF_mf:GO:001085calcium-de2/2529    | 4/23049   | 0.062086 | 0.4122 | 0.397251 | Camk2n1/C    |
| GO_MF_mf:GO:001628small cond2/2529    | 4/23049   | 0.062086 | 0.4122 | 0.397251 | Kcnn1/Kcni   |
| GO_MF_mf:GO:001680cysteine-ty2/2529   | 4/23049   | 0.062086 | 0.4122 | 0.397251 | Ctsl/Mindy   |
| GO_MF_mf:GO:001923centromeri2/2529    | 4/23049   | 0.062086 | 0.4122 | 0.397251 | Cenpc1/Ms    |
| GO_MF_mf:GO:001983phospholiç2/2529    | 4/23049   | 0.062086 | 0.4122 | 0.397251 | Anxa2/Anx    |
| GO_MF_mf:GO:003154peptidyl-pi2/2529   | 4/23049   | 0.062086 | 0.4122 | 0.397251 | Ogfod1/P3    |
| GO_MF_mf:GO:003374peptide-m2/2529     | 4/23049   | 0.062086 | 0.4122 | 0.397251 | Msrbl1/Txn.  |



|                                       |           |          |        |          |             |
|---------------------------------------|-----------|----------|--------|----------|-------------|
| GO_MF_mf:GO:003562ceramide tr2/2529   | 4/23049   | 0.062086 | 0.4122 | 0.397251 | Abcb1a/Plt  |
| GO_MF_mf:GO:004402histone me2/2529    | 4/23049   | 0.062086 | 0.4122 | 0.397251 | Prmt1/Prm   |
| GO_MF_mf:GO:005083pyruvate tr2/2529   | 4/23049   | 0.062086 | 0.4122 | 0.397251 | Mpc2/Slc1f  |
| GO_MF_mf:GO:007000cysteine-ty2/2529   | 4/23049   | 0.062086 | 0.4122 | 0.397251 | Ctsl/Mindy  |
| GO_MF_mf:GO:007057methylcyto2/2529    | 4/23049   | 0.062086 | 0.4122 | 0.397251 | Tet2/Tet3   |
| GO_MF_mf:GO:007254protein phc2/2529   | 4/23049   | 0.062086 | 0.4122 | 0.397251 | Igfbp3/Ptp  |
| GO_MF_mf:GO:009958neurotrans2/2529    | 4/23049   | 0.062086 | 0.4122 | 0.397251 | Gria1/Grin2 |
| GO_MF_mf:GO:190412phosphatic2/2529    | 4/23049   | 0.062086 | 0.4122 | 0.397251 | Abcb1a/Plt  |
| GO_MF_mf:GO:000517integrin bir18/2529 | 112/23049 | 0.062666 | 0.4122 | 0.397251 | Adam8/An    |
| GO_MF_mf:GO:001661oxidoreduc21/2529   | 135/23049 | 0.063202 | 0.4122 | 0.397251 | Adh1/Adh5   |
| GO_MF_mf:GO:001650peptidase z7/2529   | 33/23049  | 0.06328  | 0.4122 | 0.397251 | Acrbp/Cav   |
| GO_MF_mf:GO:003329monocarb13/2529     | 75/23049  | 0.063521 | 0.4122 | 0.397251 | Adh5/Akr1   |
| GO_MF_mf:GO:000418serine-type3/2529   | 9/23049   | 0.066793 | 0.4122 | 0.397251 | Cpm/Cpvl/   |
| GO_MF_mf:GO:000846histone-arc3/2529   | 9/23049   | 0.066793 | 0.4122 | 0.397251 | Prmt1/Prm   |
| GO_MF_mf:GO:000993calcium-de3/2529    | 9/23049   | 0.066793 | 0.4122 | 0.397251 | Camk2a/M    |
| GO_MF_mf:GO:001662oxidoreduc3/2529    | 9/23049   | 0.066793 | 0.4122 | 0.397251 | Bckdhb/Og   |
| GO_MF_mf:GO:004518translation9/2529   | 47/23049  | 0.066857 | 0.4122 | 0.397251 | Cpeb3/Cpe   |
| GO_MF_mf:GO:001681hydrolase z21/2529  | 136/23049 | 0.067345 | 0.4122 | 0.397251 | Acer3/Acy1  |
| GO_MF_mf:GO:000388DNA-direc6/2529     | 27/23049  | 0.068332 | 0.4122 | 0.397251 | Pole/Polg/l |
| GO_MF_mf:GO:000525delayed rer6/2529   | 27/23049  | 0.068332 | 0.4122 | 0.397251 | Kcna2/Kcna  |
| GO_MF_mf:GO:001689exoribonuc6/2529    | 27/23049  | 0.068332 | 0.4122 | 0.397251 | Noct/Cnotf  |
| GO_MF_mf:GO:000508guanyl-nur28/2529   | 192/23049 | 0.071971 | 0.4122 | 0.397251 | Arhgef18//  |
| GO_MF_mf:GO:000429threonine-5/2529    | 21/23049  | 0.072389 | 0.4122 | 0.397251 | Psm3/Psn    |
| GO_MF_mf:GO:001503protein dis15/2529  | 21/23049  | 0.072389 | 0.4122 | 0.397251 | Ero1l/Gstk1 |
| GO_MF_mf:GO:001546acetylcholin5/2529  | 21/23049  | 0.072389 | 0.4122 | 0.397251 | Chrm1/Chr   |
| GO_MF_mf:GO:007000threonine-5/2529    | 21/23049  | 0.072389 | 0.4122 | 0.397251 | Psm3/Psn    |
| GO_MF_mf:GO:007033aromatase7/2529     | 34/23049  | 0.072467 | 0.4122 | 0.397251 | Cyp2b10/C   |
| GO_MF_mf:GO:000820heparin bir22/2529  | 145/23049 | 0.072704 | 0.4122 | 0.397251 | 2300002M:   |
| GO_MF_mf:GO:007085growth fac22/2529   | 145/23049 | 0.072704 | 0.4122 | 0.397251 | Csf3/Fgf1/f |
| GO_MF_mf:GO:000551collagen bi11/2529  | 62/23049  | 0.072817 | 0.4122 | 0.397251 | 2300002M:   |
| GO_MF_mf:GO:000521ion channe54/2529   | 404/23049 | 0.073228 | 0.4122 | 0.397251 | Ano1/Ano2   |
| GO_MF_mf:GO:000817adenylate c4/2529   | 15/23049  | 0.073588 | 0.4122 | 0.397251 | Adcyap1r1.  |
| GO_MF_mf:GO:001691retinal binc4/2529  | 15/23049  | 0.073588 | 0.4122 | 0.397251 | Akr1b10/C   |
| GO_MF_mf:GO:004317amine binc4/2529    | 15/23049  | 0.073588 | 0.4122 | 0.397251 | Aldh9a1/H   |
| GO_MF_mf:GO:004652glucosyltra4/2529   | 15/23049  | 0.073588 | 0.4122 | 0.397251 | Alg6/Gys1/  |
| GO_MF_mf:GO:007040NADPH bir4/2529     | 15/23049  | 0.073588 | 0.4122 | 0.397251 | Akr1b10/C   |
| GO_MF_mf:GO:000454ribonuclea17/2529   | 107/23049 | 0.075153 | 0.4122 | 0.397251 | Noct/Cnotf  |
| GO_MF_mf:GO:005101actin filame26/2529 | 177/23049 | 0.075221 | 0.4122 | 0.397251 | Aif1l/Antxr |
| GO_MF_mf:GO:000526calcium ch18/2529   | 115/23049 | 0.077008 | 0.4122 | 0.397251 | Cacnb2/Ca   |
| GO_MF_mf:GO:001984rRNA bindi12/2529   | 70/23049  | 0.07773  | 0.4122 | 0.397251 | Ddx21/Eral  |
| GO_MF_mf:GO:001526channel ac58/2529   | 439/23049 | 0.077737 | 0.4122 | 0.397251 | Ano1/Ano2   |
| GO_MF_mf:GO:002280passive tra58/2529  | 439/23049 | 0.077737 | 0.4122 | 0.397251 | Ano1/Ano2   |
| GO_MF_mf:GO:004690tetrapyrrolk23/2529 | 154/23049 | 0.077887 | 0.4122 | 0.397251 | Cyb5a/Cyb   |
| GO_MF_mf:GO:000526cation char42/2529  | 307/23049 | 0.0785   | 0.4122 | 0.397251 | Ano1/Cacn   |
| GO_MF_mf:GO:007181lipoprotein6/2529   | 28/23049  | 0.079247 | 0.4122 | 0.397251 | Cd36/Mptx   |
| GO_MF_mf:GO:007181protein-lip6/2529   | 28/23049  | 0.079247 | 0.4122 | 0.397251 | Cd36/Mptx   |
| GO_MF_mf:GO:001676transferase11/2529  | 63/23049  | 0.079886 | 0.4122 | 0.397251 | Fdft1/Fnta/ |
| GO_MF_mf:GO:000004tRNA bindi10/2529   | 56/23049  | 0.081694 | 0.4122 | 0.397251 | 6430573F1   |

|                                 |         |           |          |        |          |             |
|---------------------------------|---------|-----------|----------|--------|----------|-------------|
| GO_MF_mf:GO:001666 oxidoreduc   | 10/2529 | 56/23049  | 0.081694 | 0.4122 | 0.397251 | Ero1l/Gstk1 |
| GO_MF_mf:GO:000469 cyclin-depr  | 7/2529  | 35/23049  | 0.0824   | 0.4122 | 0.397251 | Cdk1/Cdk2   |
| GO_MF_mf:GO:001989 kinesin bin  | 9/2529  | 49/23049  | 0.082954 | 0.4122 | 0.397251 | Ift88/Kcna2 |
| GO_MF_mf:GO:001503 disulfide o  | 8/2529  | 42/23049  | 0.083356 | 0.4122 | 0.397251 | Ero1l/Gstk1 |
| GO_MF_mf:GO:000524 voltage-ga   | 27/2529 | 187/23049 | 0.08365  | 0.4122 | 0.397251 | Ano1/Cacn   |
| GO_MF_mf:GO:002283 voltage-ga   | 27/2529 | 187/23049 | 0.08365  | 0.4122 | 0.397251 | Ano1/Cacn   |
| GO_MF_mf:GO:001920 kinase regl  | 29/2529 | 203/23049 | 0.083651 | 0.4122 | 0.397251 | Abi1/Camk   |
| GO_MF_mf:GO:000503 tumor necr   | 5/2529  | 22/23049  | 0.085578 | 0.4122 | 0.397251 | Tnfrsf10b/1 |
| GO_MF_mf:GO:000503 death rece   | 5/2529  | 22/23049  | 0.085578 | 0.4122 | 0.397251 | Tnfrsf10b/1 |
| GO_MF_mf:GO:000848 transamina   | 5/2529  | 22/23049  | 0.085578 | 0.4122 | 0.397251 | Abat/Bcat2  |
| GO_MF_mf:GO:001663 oxidoreduc   | 5/2529  | 22/23049  | 0.085578 | 0.4122 | 0.397251 | Aoc1/Aoc3   |
| GO_MF_mf:GO:005099 nitric-oxid  | 5/2529  | 22/23049  | 0.085578 | 0.4122 | 0.397251 | Atp2b4/Ca   |
| GO_MF_mf:GO:001675 transferase  | 38/2529 | 277/23049 | 0.087582 | 0.4122 | 0.397251 | A4gnt/Abo   |
| GO_MF_mf:GO:000159 dopamine     | 3/2529  | 10/23049  | 0.087868 | 0.4122 | 0.397251 | Adra1d/Dra  |
| GO_MF_mf:GO:000850 monoamin     | 3/2529  | 10/23049  | 0.087868 | 0.4122 | 0.397251 | Slc18a2/Slc |
| GO_MF_mf:GO:001085 calcium-de   | 3/2529  | 10/23049  | 0.087868 | 0.4122 | 0.397251 | Camk2a/M    |
| GO_MF_mf:GO:003471 type I trans | 3/2529  | 10/23049  | 0.087868 | 0.4122 | 0.397251 | Smad6/Sm    |
| GO_MF_mf:GO:005030 sugar-pho    | 3/2529  | 10/23049  | 0.087868 | 0.4122 | 0.397251 | G6pc2/Pfkf  |
| GO_MF_mf:GO:005101 microtubul   | 3/2529  | 10/23049  | 0.087868 | 0.4122 | 0.397251 | Tmod3/Tul   |
| GO_MF_mf:GO:002283 gated char   | 42/2529 | 310/23049 | 0.088174 | 0.4122 | 0.397251 | Ano1/Ano2   |
| GO_MF_mf:GO:004205 histone me   | 10/2529 | 57/23049  | 0.089814 | 0.4122 | 0.397251 | Ash2l/Ezh1  |
| GO_MF_mf:GO:001667 oxidoreduc   | 4/2529  | 16/23049  | 0.089931 | 0.4122 | 0.397251 | Ero1l/Msrb  |
| GO_MF_mf:GO:001685 racemase     | 4/2529  | 16/23049  | 0.089931 | 0.4122 | 0.397251 | Dse/Dsel/M  |
| GO_MF_mf:GO:001686 intramolec   | 4/2529  | 16/23049  | 0.089931 | 0.4122 | 0.397251 | Dct/Eci2/Ef |
| GO_MF_mf:GO:001713 NAD-depe     | 4/2529  | 16/23049  | 0.089931 | 0.4122 | 0.397251 | Hdac1/Hda   |
| GO_MF_mf:GO:003029 protein tyr  | 4/2529  | 16/23049  | 0.089931 | 0.4122 | 0.397251 | Abi1/Dgkq   |
| GO_MF_mf:GO:190168 sulfur com   | 33/2529 | 237/23049 | 0.090433 | 0.4122 | 0.397251 | 2300002M:   |
| GO_MF_mf:GO:000522 calcium act  | 6/2529  | 29/23049  | 0.091079 | 0.4122 | 0.397251 | Ano1/Kcnn   |
| GO_MF_mf:GO:000817 tRNA meth    | 6/2529  | 29/23049  | 0.091079 | 0.4122 | 0.397251 | 6430573F1   |
| GO_MF_mf:GO:003051 snoRNA bir   | 6/2529  | 29/23049  | 0.091079 | 0.4122 | 0.397251 | Bms1/Ddx2   |
| GO_MF_mf:GO:001988 protein kin  | 26/2529 | 181/23049 | 0.092392 | 0.4122 | 0.397251 | Abi1/Camk   |
| GO_MF_mf:GO:000550 fatty acid   | 8/2529  | 43/23049  | 0.093047 | 0.4122 | 0.397251 | Adh5/Cd3e   |
| GO_MF_mf:GO:000800 chemokine    | 8/2529  | 43/23049  | 0.093047 | 0.4122 | 0.397251 | Ccl20/Ccl2: |
| GO_MF_mf:GO:003054 Hsp70 prot   | 8/2529  | 43/23049  | 0.093047 | 0.4122 | 0.397251 | Cdk1/Fgf1/  |
| GO_MF_mf:GO:005066 NADP bind    | 8/2529  | 43/23049  | 0.093047 | 0.4122 | 0.397251 | Akr1b10/C   |
| GO_MF_mf:GO:001683 carboxy-ly   | 7/2529  | 36/23049  | 0.093074 | 0.4122 | 0.397251 | Ddt/Fahd1.  |
| GO_MF_mf:GO:003406 DNA polyn    | 7/2529  | 36/23049  | 0.093074 | 0.4122 | 0.397251 | Hmbox1/Pi   |
| GO_MF_mf:GO:003517 histone kin  | 7/2529  | 36/23049  | 0.093074 | 0.4122 | 0.397251 | Cdk1/Cdk2   |
| GO_MF_mf:GO:009747 cyclin-depr  | 7/2529  | 36/23049  | 0.093074 | 0.4122 | 0.397251 | Cdk1/Cdk2   |
| GO_MF_mf:GO:000188 purine nucl  | 47/2529 | 353/23049 | 0.093674 | 0.4122 | 0.397251 | Adora1/Ad   |
| GO_MF_mf:GO:000010 succinate c  | 2/2529  | 5/23049   | 0.096063 | 0.4122 | 0.397251 | Sdhaf4/Sdf  |
| GO_MF_mf:GO:000040 bubble DN    | 2/2529  | 5/23049   | 0.096063 | 0.4122 | 0.397251 | Blm/Ercc5   |
| GO_MF_mf:GO:000163 cysteinyl le | 2/2529  | 5/23049   | 0.096063 | 0.4122 | 0.397251 | Cysltr2/Ltb |
| GO_MF_mf:GO:000392 GPI-ancho    | 2/2529  | 5/23049   | 0.096063 | 0.4122 | 0.397251 | Pigs/Pigu   |
| GO_MF_mf:GO:000433 fructose-2,  | 2/2529  | 5/23049   | 0.096063 | 0.4122 | 0.397251 | Pfkfb1/Tig  |
| GO_MF_mf:GO:000464 phosphory    | 2/2529  | 5/23049   | 0.096063 | 0.4122 | 0.397251 | Pygb/Pygn   |
| GO_MF_mf:GO:000475 serine C-p   | 2/2529  | 5/23049   | 0.096063 | 0.4122 | 0.397251 | Sptlc2/Spts |
| GO_MF_mf:GO:000497 leukotriene  | 2/2529  | 5/23049   | 0.096063 | 0.4122 | 0.397251 | Cysltr2/Ltb |

|                                       |           |          |        |          |             |
|---------------------------------------|-----------|----------|--------|----------|-------------|
| GO_MF_mf:GO:000498opioid recep2/2529  | 5/23049   | 0.096063 | 0.4122 | 0.397251 | Oprd1/Opr   |
| GO_MF_mf:GO:000817succinate c2/2529   | 5/23049   | 0.096063 | 0.4122 | 0.397251 | Sdhaf4/Sdh  |
| GO_MF_mf:GO:000851folic acid tr2/2529 | 5/23049   | 0.096063 | 0.4122 | 0.397251 | Folr2/Slc46 |
| GO_MF_mf:GO:001085cyclase acti2/2529  | 5/23049   | 0.096063 | 0.4122 | 0.397251 | Guca1a/Gu   |
| GO_MF_mf:GO:001645C-palmitoy2/2529    | 5/23049   | 0.096063 | 0.4122 | 0.397251 | Sptlc2/Spts |
| GO_MF_mf:GO:001704N-acylsphi 2/2529   | 5/23049   | 0.096063 | 0.4122 | 0.397251 | Acer3/Asaf  |
| GO_MF_mf:GO:003025guanylate c2/2529   | 5/23049   | 0.096063 | 0.4122 | 0.397251 | Guca1a/Gu   |
| GO_MF_mf:GO:003213DNA insert 2/2529   | 5/23049   | 0.096063 | 0.4122 | 0.397251 | Msh3/Pcna   |
| GO_MF_mf:GO:003240MutLalpha 2/2529    | 5/23049   | 0.096063 | 0.4122 | 0.397251 | Atr/Pcna    |
| GO_MF_mf:GO:004312tumor necr2/2529    | 5/23049   | 0.096063 | 0.4122 | 0.397251 | Tnfrsf1a/Tr |
| GO_MF_mf:GO:004691transferase 2/2529  | 5/23049   | 0.096063 | 0.4122 | 0.397251 | Clybl/Hmg   |
| GO_MF_mf:GO:0046931-phospha2/2529     | 5/23049   | 0.096063 | 0.4122 | 0.397251 | Pik3r3/Pik3 |
| GO_MF_mf:GO:007009fructose-6-2/2529   | 5/23049   | 0.096063 | 0.4122 | 0.397251 | Pfkfb1/Pfkf |
| GO_MF_mf:GO:005083cell adhesi62/2529  | 480/23049 | 0.098137 | 0.4122 | 0.397251 | Abcf3/Abi1  |
| GO_MF_mf:GO:000817O-methyltr5/2529    | 23/23049  | 0.099932 | 0.4122 | 0.397251 | Cmtr2/Coc   |
| GO_MF_mf:GO:000819ferrous iron5/2529  | 23/23049  | 0.099932 | 0.4122 | 0.397251 | 6430573F1   |
| GO_MF_mf:GO:001679hydrolase c5/2529   | 23/23049  | 0.099932 | 0.4122 | 0.397251 | Art5/Dnph   |
| GO_MF_mf:GO:004339heparan su5/2529    | 23/23049  | 0.099932 | 0.4122 | 0.397251 | Gpc4/Itgan  |
| GO_MF_mf:GO:000485enzyme int53/2529   | 405/23049 | 0.100028 | 0.4122 | 0.397251 | 2810408A1   |
| GO_MF_mf:GO:000516transformir9/2529   | 51/23049  | 0.101184 | 0.4122 | 0.397251 | Amh/Bmp3    |
| GO_MF_mf:GO:003017pyridoxal p9/2529   | 51/23049  | 0.101184 | 0.4122 | 0.397251 | Abat/Gldc/  |
| GO_MF_mf:GO:001701Ras GTPase52/2529   | 397/23049 | 0.101233 | 0.4122 | 0.397251 | 1700123L1   |
| GO_MF_mf:GO:001661oxidoreduc22/2529   | 151/23049 | 0.10192  | 0.4122 | 0.397251 | Adh1/Adh5   |
| GO_MF_mf:GO:007032lipoprotein 6/2529  | 30/23049  | 0.103808 | 0.4122 | 0.397251 | Ankra2/Hsq  |
| GO_MF_mf:GO:002283substrate-c54/2529  | 415/23049 | 0.105259 | 0.4122 | 0.397251 | Ano1/Ano2   |
| GO_MF_mf:GO:007234modified a14/2529   | 89/23049  | 0.105786 | 0.4122 | 0.397251 | Cpne6/Fasi  |
| GO_MF_mf:GO:002283ion gated c41/2529  | 307/23049 | 0.107188 | 0.4122 | 0.397251 | Ano1/Ano2   |
| GO_MF_mf:GO:000471protein tyrc22/2529 | 152/23049 | 0.107424 | 0.4122 | 0.397251 | Aatk/Abl2/  |
| GO_MF_mf:GO:003143mitogen-a12/2529    | 74/23049  | 0.107636 | 0.4122 | 0.397251 | Epha10/Ep   |
| GO_MF_mf:GO:003022lipoprotein 4/2529  | 17/23049  | 0.107841 | 0.4122 | 0.397251 | Cd36/Scart  |
| GO_MF_mf:GO:003497NAD-depe4/2529      | 17/23049  | 0.107841 | 0.4122 | 0.397251 | Hdac1/Hda   |
| GO_MF_mf:GO:003604long-chain 4/2529   | 17/23049  | 0.107841 | 0.4122 | 0.397251 | Cd36/Cyp4   |
| GO_MF_mf:GO:004216acetylcholin4/2529  | 17/23049  | 0.107841 | 0.4122 | 0.397251 | Ache/Chrr   |
| GO_MF_mf:GO:004329glutathione4/2529   | 17/23049  | 0.107841 | 0.4122 | 0.397251 | Ltc4s/Mgst  |
| GO_MF_mf:GO:190075oligopeptic 4/2529  | 17/23049  | 0.107841 | 0.4122 | 0.397251 | Ltc4s/Mgst  |
| GO_MF_mf:GO:000099RNA polymr 1/2529   | 1/23049   | 0.109723 | 0.4122 | 0.397251 | Maf1        |
| GO_MF_mf:GO:000162nociceptin 1/2529   | 1/23049   | 0.109723 | 0.4122 | 0.397251 | Oprl1       |
| GO_MF_mf:GO:000168sialate O-a1/2529   | 1/23049   | 0.109723 | 0.4122 | 0.397251 | Siae        |
| GO_MF_mf:GO:000205adenine bir1/2529   | 1/23049   | 0.109723 | 0.4122 | 0.397251 | Aprt        |
| GO_MF_mf:GO:000205thymine bir1/2529   | 1/23049   | 0.109723 | 0.4122 | 0.397251 | Dpys        |
| GO_MF_mf:GO:000211interleukin-1/2529  | 1/23049   | 0.109723 | 0.4122 | 0.397251 | Il1rl1      |
| GO_MF_mf:GO:0003841-pyrroline 1/2529  | 1/23049   | 0.109723 | 0.4122 | 0.397251 | Aldh4a1     |
| GO_MF_mf:GO:0003863-hydroxy 1/2529    | 1/23049   | 0.109723 | 0.4122 | 0.397251 | Hibch       |
| GO_MF_mf:GO:0003864-aminobu 1/2529    | 1/23049   | 0.109723 | 0.4122 | 0.397251 | Abat        |
| GO_MF_mf:GO:000387ATP adeny 1/2529    | 1/23049   | 0.109723 | 0.4122 | 0.397251 | Kars        |
| GO_MF_mf:GO:000390alkylbase C1/2529   | 1/23049   | 0.109723 | 0.4122 | 0.397251 | Mpg         |
| GO_MF_mf:GO:000393GTP cycloh1/2529    | 1/23049   | 0.109723 | 0.4122 | 0.397251 | Gch1        |
| GO_MF_mf:GO:000394N-acetylga1/2529    | 1/23049   | 0.109723 | 0.4122 | 0.397251 | Arsb        |

|                               |        |         |          |        |          |         |
|-------------------------------|--------|---------|----------|--------|----------|---------|
| GO_MF_m:GO:000397UDP-gluc     | 1/2529 | 1/23049 | 0.109723 | 0.4122 | 0.397251 | Ugdh    |
| GO_MF_m:GO:000398UTP:glucos   | 1/2529 | 1/23049 | 0.109723 | 0.4122 | 0.397251 | Ugp2    |
| GO_MF_m:GO:000399adenine ph   | 1/2529 | 1/23049 | 0.109723 | 0.4122 | 0.397251 | Aprt    |
| GO_MF_m:GO:000400adenosine    | 1/2529 | 1/23049 | 0.109723 | 0.4122 | 0.397251 | Adk     |
| GO_MF_m:GO:000407biotin-[ace  | 1/2529 | 1/23049 | 0.109723 | 0.4122 | 0.397251 | Hlcs    |
| GO_MF_m:GO:000407biotin-[me   | 1/2529 | 1/23049 | 0.109723 | 0.4122 | 0.397251 | Hlcs    |
| GO_MF_m:GO:000407biotin-[me   | 1/2529 | 1/23049 | 0.109723 | 0.4122 | 0.397251 | Hlcs    |
| GO_MF_m:GO:000408biotin-[pro  | 1/2529 | 1/23049 | 0.109723 | 0.4122 | 0.397251 | Hlcs    |
| GO_MF_m:GO:000408bisphospho   | 1/2529 | 1/23049 | 0.109723 | 0.4122 | 0.397251 | Tigar   |
| GO_MF_m:GO:000413cytosine de  | 1/2529 | 1/23049 | 0.109723 | 0.4122 | 0.397251 | Apobec1 |
| GO_MF_m:GO:000413deoxyribos   | 1/2529 | 1/23049 | 0.109723 | 0.4122 | 0.397251 | Dera    |
| GO_MF_m:GO:000415dihydropyr   | 1/2529 | 1/23049 | 0.109723 | 0.4122 | 0.397251 | Dpys    |
| GO_MF_m:GO:000415dihydroura   | 1/2529 | 1/23049 | 0.109723 | 0.4122 | 0.397251 | Dpyd    |
| GO_MF_m:GO:000416diphospho    | 1/2529 | 1/23049 | 0.109723 | 0.4122 | 0.397251 | Mvd     |
| GO_MF_m:GO:000430ethanolami   | 1/2529 | 1/23049 | 0.109723 | 0.4122 | 0.397251 | Pcyt2   |
| GO_MF_m:GO:000431farnesyl-di  | 1/2529 | 1/23049 | 0.109723 | 0.4122 | 0.397251 | Fdft1   |
| GO_MF_m:GO:000431[acyl-carrie | 1/2529 | 1/23049 | 0.109723 | 0.4122 | 0.397251 | Fasn    |
| GO_MF_m:GO:0004313-oxoacyl-   | 1/2529 | 1/23049 | 0.109723 | 0.4122 | 0.397251 | Fasn    |
| GO_MF_m:GO:0004313-hydroxy    | 1/2529 | 1/23049 | 0.109723 | 0.4122 | 0.397251 | Fasn    |
| GO_MF_m:GO:000431enoyle-[acyl | 1/2529 | 1/23049 | 0.109723 | 0.4122 | 0.397251 | Fasn    |
| GO_MF_m:GO:000437glycerone l  | 1/2529 | 1/23049 | 0.109723 | 0.4122 | 0.397251 | Tkfc    |
| GO_MF_m:GO:000437glycine del  | 1/2529 | 1/23049 | 0.109723 | 0.4122 | 0.397251 | Gldc    |
| GO_MF_m:GO:000438glycoprote   | 1/2529 | 1/23049 | 0.109723 | 0.4122 | 0.397251 | Abo     |
| GO_MF_m:GO:000438fucosylgala  | 1/2529 | 1/23049 | 0.109723 | 0.4122 | 0.397251 | Abo     |
| GO_MF_m:GO:000438hexaprenyl   | 1/2529 | 1/23049 | 0.109723 | 0.4122 | 0.397251 | Coq3    |
| GO_MF_m:GO:000439histidine de | 1/2529 | 1/23049 | 0.109723 | 0.4122 | 0.397251 | Hdc     |
| GO_MF_m:GO:000447malate syn   | 1/2529 | 1/23049 | 0.109723 | 0.4122 | 0.397251 | Clybl   |
| GO_MF_m:GO:000449methylmal    | 1/2529 | 1/23049 | 0.109723 | 0.4122 | 0.397251 | Mcee    |
| GO_MF_m:GO:000449methylmal    | 1/2529 | 1/23049 | 0.109723 | 0.4122 | 0.397251 | Mut     |
| GO_MF_m:GO:000450monophen     | 1/2529 | 1/23049 | 0.109723 | 0.4122 | 0.397251 | Tyr     |
| GO_MF_m:GO:000451tyrosine 3-  | 1/2529 | 1/23049 | 0.109723 | 0.4122 | 0.397251 | Th      |
| GO_MF_m:GO:000458ornithine c  | 1/2529 | 1/23049 | 0.109723 | 0.4122 | 0.397251 | Otc     |
| GO_MF_m:GO:000459peptide-as   | 1/2529 | 1/23049 | 0.109723 | 0.4122 | 0.397251 | Asph    |
| GO_MF_m:GO:000460phenyletha   | 1/2529 | 1/23049 | 0.109723 | 0.4122 | 0.397251 | Pnmt    |
| GO_MF_m:GO:000461phosphoac    | 1/2529 | 1/23049 | 0.109723 | 0.4122 | 0.397251 | Pgm3    |
| GO_MF_m:GO:000465polyribonu   | 1/2529 | 1/23049 | 0.109723 | 0.4122 | 0.397251 | Pnpt1   |
| GO_MF_m:GO:000472prenylated   | 1/2529 | 1/23049 | 0.109723 | 0.4122 | 0.397251 | Ptp4a1  |
| GO_MF_m:GO:000473pyruvate c   | 1/2529 | 1/23049 | 0.109723 | 0.4122 | 0.397251 | Pcx     |
| GO_MF_m:GO:000475ribulose-pl  | 1/2529 | 1/23049 | 0.109723 | 0.4122 | 0.397251 | Rpe     |
| GO_MF_m:GO:000482lysine-tRN   | 1/2529 | 1/23049 | 0.109723 | 0.4122 | 0.397251 | Kars    |
| GO_MF_m:GO:000501platelet-de  | 1/2529 | 1/23049 | 0.109723 | 0.4122 | 0.397251 | Pdgfra  |
| GO_MF_m:GO:000509Sar guanyl-  | 1/2529 | 1/23049 | 0.109723 | 0.4122 | 0.397251 | Preb    |
| GO_MF_m:GO:000514interleukin- | 1/2529 | 1/23049 | 0.109723 | 0.4122 | 0.397251 | Il10    |
| GO_MF_m:GO:000515interleukin- | 1/2529 | 1/23049 | 0.109723 | 0.4122 | 0.397251 | Il1rn   |
| GO_MF_m:GO:000531high-affinit | 1/2529 | 1/23049 | 0.109723 | 0.4122 | 0.397251 | Slc20a1 |
| GO_MF_m:GO:00084025-hydroxy   | 1/2529 | 1/23049 | 0.109723 | 0.4122 | 0.397251 | Cyp24a1 |
| GO_MF_m:GO:000842glycoprote   | 1/2529 | 1/23049 | 0.109723 | 0.4122 | 0.397251 | Fut8    |
| GO_MF_m:GO:0008422-polyprer   | 1/2529 | 1/23049 | 0.109723 | 0.4122 | 0.397251 | Coq3    |

|                                       |         |          |        |          |            |
|---------------------------------------|---------|----------|--------|----------|------------|
| GO_MF_m:GO:000844D-aspartat 1/2529    | 1/23049 | 0.109723 | 0.4122 | 0.397251 | Ddo        |
| GO_MF_m:GO:000845carnitine O 1/2529   | 1/23049 | 0.109723 | 0.4122 | 0.397251 | Crot       |
| GO_MF_m:GO:000846sulfite oxid 1/2529  | 1/23049 | 0.109723 | 0.4122 | 0.397251 | Suox       |
| GO_MF_m:GO:0008633-demethy 1/2529     | 1/23049 | 0.109723 | 0.4122 | 0.397251 | Coq3       |
| GO_MF_m:GO:000872DNA-3-mε 1/2529      | 1/23049 | 0.109723 | 0.4122 | 0.397251 | Mpg        |
| GO_MF_m:GO:000875NADPH de 1/2529      | 1/23049 | 0.109723 | 0.4122 | 0.397251 | Cbr4       |
| GO_MF_m:GO:000878agmatinasε 1/2529    | 1/23049 | 0.109723 | 0.4122 | 0.397251 | Agmat      |
| GO_MF_m:GO:000881cob(II)yrinic 1/2529 | 1/23049 | 0.109723 | 0.4122 | 0.397251 | Mmab       |
| GO_MF_m:GO:000888glycerate k 1/2529   | 1/23049 | 0.109723 | 0.4122 | 0.397251 | Glyctk     |
| GO_MF_m:GO:000889guanine de 1/2529    | 1/23049 | 0.109723 | 0.4122 | 0.397251 | Gda        |
| GO_MF_m:GO:000894nitric oxide 1/2529  | 1/23049 | 0.109723 | 0.4122 | 0.397251 | Por        |
| GO_MF_m:GO:000895peptidogly 1/2529    | 1/23049 | 0.109723 | 0.4122 | 0.397251 | Csgalnact1 |
| GO_MF_m:GO:000900site-specific 1/2529 | 1/23049 | 0.109723 | 0.4122 | 0.397251 | Mettl4     |
| GO_MF_m:GO:001042polyprenylc 1/2529   | 1/23049 | 0.109723 | 0.4122 | 0.397251 | Coq3       |
| GO_MF_m:GO:001509molybdate 1/2529     | 1/23049 | 0.109723 | 0.4122 | 0.397251 | Mfsd5      |
| GO_MF_m:GO:001519L-leucine t 1/2529   | 1/23049 | 0.109723 | 0.4122 | 0.397251 | Slc38a7    |
| GO_MF_m:GO:001519L-methioni 1/2529    | 1/23049 | 0.109723 | 0.4122 | 0.397251 | Slc38a7    |
| GO_MF_m:GO:001543bile acid-e: 1/2529  | 1/23049 | 0.109723 | 0.4122 | 0.397251 | Abcc3      |
| GO_MF_m:GO:001565branched-r 1/2529    | 1/23049 | 0.109723 | 0.4122 | 0.397251 | Slc38a7    |
| GO_MF_m:GO:001592aspartate c 1/2529   | 1/23049 | 0.109723 | 0.4122 | 0.397251 | Ddo        |
| GO_MF_m:GO:001627cytochrom 1/2529     | 1/23049 | 0.109723 | 0.4122 | 0.397251 | Prmt1      |
| GO_MF_m:GO:001641O-octanoy 1/2529     | 1/23049 | 0.109723 | 0.4122 | 0.397251 | Crot       |
| GO_MF_m:GO:001641octanoyltra 1/2529   | 1/23049 | 0.109723 | 0.4122 | 0.397251 | Crot       |
| GO_MF_m:GO:001649substance l 1/2529   | 1/23049 | 0.109723 | 0.4122 | 0.397251 | Tacr2      |
| GO_MF_m:GO:001664oxidoreduc 1/2529    | 1/23049 | 0.109723 | 0.4122 | 0.397251 | Gldc       |
| GO_MF_m:GO:001670oxidoreduc 1/2529    | 1/23049 | 0.109723 | 0.4122 | 0.397251 | Por        |
| GO_MF_m:GO:001678transferase 1/2529   | 1/23049 | 0.109723 | 0.4122 | 0.397251 | Sepsecs    |
| GO_MF_m:GO:001702myosin l bi 1/2529   | 1/23049 | 0.109723 | 0.4122 | 0.397251 | Pycard     |
| GO_MF_m:GO:001706tyrosine-eε 1/2529   | 1/23049 | 0.109723 | 0.4122 | 0.397251 | Sult1a1    |
| GO_MF_m:GO:001711dihydropyr 1/2529    | 1/23049 | 0.109723 | 0.4122 | 0.397251 | Dpyd       |
| GO_MF_m:GO:001827biotin-prot 1/2529   | 1/23049 | 0.109723 | 0.4122 | 0.397251 | Hlcs       |
| GO_MF_m:GO:001846formaldehy 1/2529    | 1/23049 | 0.109723 | 0.4122 | 0.397251 | Adh5       |
| GO_MF_m:GO:001873S-formylgl 1/2529    | 1/23049 | 0.109723 | 0.4122 | 0.397251 | Esd        |
| GO_MF_m:GO:001877acetylpyruv 1/2529   | 1/23049 | 0.109723 | 0.4122 | 0.397251 | Fahd1      |
| GO_MF_m:GO:001914aminobuty 1/2529     | 1/23049 | 0.109723 | 0.4122 | 0.397251 | Aldh9a1    |
| GO_MF_m:GO:0019173-hydroxyε 1/2529    | 1/23049 | 0.109723 | 0.4122 | 0.397251 | Fasn       |
| GO_MF_m:GO:002289Intermedia 1/2529    | 1/23049 | 0.109723 | 0.4122 | 0.397251 | Kcnn4      |
| GO_MF_m:GO:003017voltage-ga 1/2529    | 1/23049 | 0.109723 | 0.4122 | 0.397251 | Hvcn1      |
| GO_MF_m:GO:0030341-alpha,25 1/2529    | 1/23049 | 0.109723 | 0.4122 | 0.397251 | Cyp24a1    |
| GO_MF_m:GO:003050inorganic c 1/2529   | 1/23049 | 0.109723 | 0.4122 | 0.397251 | Ank        |
| GO_MF_m:GO:003051snoRNP bir 1/2529    | 1/23049 | 0.109723 | 0.4122 | 0.397251 | Prmt1      |
| GO_MF_m:GO:003058quinone cc 1/2529    | 1/23049 | 0.109723 | 0.4122 | 0.397251 | Coq3       |
| GO_MF_m:GO:003058[methionin 1/2529    | 1/23049 | 0.109723 | 0.4122 | 0.397251 | Mtrr       |
| GO_MF_m:GO:003079arsenite mε 1/2529   | 1/23049 | 0.109723 | 0.4122 | 0.397251 | As3mt      |
| GO_MF_m:GO:003079methylarso 1/2529    | 1/23049 | 0.109723 | 0.4122 | 0.397251 | As3mt      |
| GO_MF_m:GO:003124denatured 1/2529     | 1/23049 | 0.109723 | 0.4122 | 0.397251 | Hspa1a     |
| GO_MF_m:GO:003137eukaryotic 1/2529    | 1/23049 | 0.109723 | 0.4122 | 0.397251 | Eif4e      |
| GO_MF_m:GO:003170adrenomec 1/2529     | 1/23049 | 0.109723 | 0.4122 | 0.397251 | Adm        |

|                                            |        |         |          |        |          |         |
|--------------------------------------------|--------|---------|----------|--------|----------|---------|
| GO_MF_m:GO:003171cannabinoid               | 1/2529 | 1/23049 | 0.109723 | 0.4122 | 0.397251 | Cnrip1  |
| GO_MF_m:GO:003171type 1 cannabinoid        | 1/2529 | 1/23049 | 0.109723 | 0.4122 | 0.397251 | Cnrip1  |
| GO_MF_m:GO:003186prolactin-receptor        | 1/2529 | 1/23049 | 0.109723 | 0.4122 | 0.397251 | Prlhr   |
| GO_MF_m:GO:003186EP4 subtype               | 1/2529 | 1/23049 | 0.109723 | 0.4122 | 0.397251 | Fem1a   |
| GO_MF_m:GO:003284calcitonin receptor       | 1/2529 | 1/23049 | 0.109723 | 0.4122 | 0.397251 | Calcr   |
| GO_MF_m:GO:003328organic acid              | 1/2529 | 1/23049 | 0.109723 | 0.4122 | 0.397251 | Abcc3   |
| GO_MF_m:GO:003328carboxylic acid           | 1/2529 | 1/23049 | 0.109723 | 0.4122 | 0.397251 | Abcc3   |
| GO_MF_m:GO:003328monocarboxylic acid       | 1/2529 | 1/23049 | 0.109723 | 0.4122 | 0.397251 | Abcc3   |
| GO_MF_m:GO:003368DNA 5'-adenosine          | 1/2529 | 1/23049 | 0.109723 | 0.4122 | 0.397251 | Aptx    |
| GO_MF_m:GO:003378cholesterol               | 1/2529 | 1/23049 | 0.109723 | 0.4122 | 0.397251 | Cyp46a1 |
| GO_MF_m:GO:003378cyanocobalamin            | 1/2529 | 1/23049 | 0.109723 | 0.4122 | 0.397251 | Mmachc  |
| GO_MF_m:GO:00338810-hydroxy                | 1/2529 | 1/23049 | 0.109723 | 0.4122 | 0.397251 | Ephx2   |
| GO_MF_m:GO:003397hydroxyisovaleryl         | 1/2529 | 1/23049 | 0.109723 | 0.4122 | 0.397251 | Urah    |
| GO_MF_m:GO:003398D-dopachrome              | 1/2529 | 1/23049 | 0.109723 | 0.4122 | 0.397251 | Ddt     |
| GO_MF_m:GO:0033983alpha,7alpha             | 1/2529 | 1/23049 | 0.109723 | 0.4122 | 0.397251 | Hsd17b4 |
| GO_MF_m:GO:003401FAD-AMP                   | 1/2529 | 1/23049 | 0.109723 | 0.4122 | 0.397251 | Tkfc    |
| GO_MF_m:GO:003454fumarylpyruvate           | 1/2529 | 1/23049 | 0.109723 | 0.4122 | 0.397251 | Fahd1   |
| GO_MF_m:GO:003522glutamate                 | 1/2529 | 1/23049 | 0.109723 | 0.4122 | 0.397251 | Gclm    |
| GO_MF_m:GO:003543cyclic-di-GMP             | 1/2529 | 1/23049 | 0.109723 | 0.4122 | 0.397251 | Tmem173 |
| GO_MF_m:GO:003621GTP diphosphate           | 1/2529 | 1/23049 | 0.109723 | 0.4122 | 0.397251 | Nudt1   |
| GO_MF_m:GO:003631tyrosyl-RNase             | 1/2529 | 1/23049 | 0.109723 | 0.4122 | 0.397251 | Tdp2    |
| GO_MF_m:GO:003648nitric-oxide              | 1/2529 | 1/23049 | 0.109723 | 0.4122 | 0.397251 | Atp2b4  |
| GO_MF_m:GO:003804enkephalin                | 1/2529 | 1/23049 | 0.109723 | 0.4122 | 0.397251 | Oprd1   |
| GO_MF_m:GO:004200interleukin-1             | 1/2529 | 1/23049 | 0.109723 | 0.4122 | 0.397251 | Il18bp  |
| GO_MF_m:GO:004213thiamine pyrophosphate    | 1/2529 | 1/23049 | 0.109723 | 0.4122 | 0.397251 | Acpp    |
| GO_MF_m:GO:004216interleukin-1             | 1/2529 | 1/23049 | 0.109723 | 0.4122 | 0.397251 | Il12b   |
| GO_MF_m:GO:004328sodium-dependent          | 1/2529 | 1/23049 | 0.109723 | 0.4122 | 0.397251 | Slc10a6 |
| GO_MF_m:GO:004373DNA-3-methyl              | 1/2529 | 1/23049 | 0.109723 | 0.4122 | 0.397251 | Mpg     |
| GO_MF_m:GO:004378acetate-CoA               | 1/2529 | 1/23049 | 0.109723 | 0.4122 | 0.397251 | Acsl1   |
| GO_MF_m:GO:004386methionine                | 1/2529 | 1/23049 | 0.109723 | 0.4122 | 0.397251 | Slc38a7 |
| GO_MF_m:GO:004387acireductoisomerase       | 1/2529 | 1/23049 | 0.109723 | 0.4122 | 0.397251 | Enoph1  |
| GO_MF_m:GO:004389N-acetylglucosamine       | 1/2529 | 1/23049 | 0.109723 | 0.4122 | 0.397251 | Galns   |
| GO_MF_m:GO:004391DNA-7-methyl              | 1/2529 | 1/23049 | 0.109723 | 0.4122 | 0.397251 | Mpg     |
| GO_MF_m:GO:004399histone acetyltransferase | 1/2529 | 1/23049 | 0.109723 | 0.4122 | 0.397251 | Kat2a   |
| GO_MF_m:GO:00445917-beta-hydroxy           | 1/2529 | 1/23049 | 0.109723 | 0.4122 | 0.397251 | Hsd17b4 |
| GO_MF_m:GO:0044712-hydroxy                 | 1/2529 | 1/23049 | 0.109723 | 0.4122 | 0.397251 | Nudt1   |
| GO_MF_m:GO:0044712-hydroxy                 | 1/2529 | 1/23049 | 0.109723 | 0.4122 | 0.397251 | Nudt1   |
| GO_MF_m:GO:004473bone sialoprotein         | 1/2529 | 1/23049 | 0.109723 | 0.4122 | 0.397251 | Anxa2   |
| GO_MF_m:GO:004503ATP-activated             | 1/2529 | 1/23049 | 0.109723 | 0.4122 | 0.397251 | P2ry1   |
| GO_MF_m:GO:004503ADP-activated             | 1/2529 | 1/23049 | 0.109723 | 0.4122 | 0.397251 | P2ry1   |
| GO_MF_m:GO:004535interleukin-1             | 1/2529 | 1/23049 | 0.109723 | 0.4122 | 0.397251 | Il1rn   |
| GO_MF_m:GO:004535interleukin-1             | 1/2529 | 1/23049 | 0.109723 | 0.4122 | 0.397251 | Il1rn   |
| GO_MF_m:GO:004543uridine nucleotide        | 1/2529 | 1/23049 | 0.109723 | 0.4122 | 0.397251 | Ung     |
| GO_MF_m:GO:004550interleukin-1             | 1/2529 | 1/23049 | 0.109723 | 0.4122 | 0.397251 | Il27ra  |
| GO_MF_m:GO:004657methylthioadenosine       | 1/2529 | 1/23049 | 0.109723 | 0.4122 | 0.397251 | Apiip   |
| GO_MF_m:GO:004692alpha-(1->3)              | 1/2529 | 1/23049 | 0.109723 | 0.4122 | 0.397251 | Fut8    |
| GO_MF_m:GO:004701cholesterol-5-reductase   | 1/2529 | 1/23049 | 0.109723 | 0.4122 | 0.397251 | Hsd3b7  |
| GO_MF_m:GO:0047104-trimethyl               | 1/2529 | 1/23049 | 0.109723 | 0.4122 | 0.397251 | Aldh9a1 |

|                               |        |         |          |        |          |         |
|-------------------------------|--------|---------|----------|--------|----------|---------|
| GO_MF_m:GO:004711enoyl-[acyl  | 1/2529 | 1/23049 | 0.109723 | 0.4122 | 0.397251 | Fasn    |
| GO_MF_m:GO:004713aquacobal    | 1/2529 | 1/23049 | 0.109723 | 0.4122 | 0.397251 | Mtrr    |
| GO_MF_m:GO:0047161-alkenylgl  | 1/2529 | 1/23049 | 0.109723 | 0.4122 | 0.397251 | Lpcat4  |
| GO_MF_m:GO:004729(S)-3-amin   | 1/2529 | 1/23049 | 0.109723 | 0.4122 | 0.397251 | Abat    |
| GO_MF_m:GO:004740protein-glu  | 1/2529 | 1/23049 | 0.109723 | 0.4122 | 0.397251 | Pgghg   |
| GO_MF_m:GO:0047453-hydroxy    | 1/2529 | 1/23049 | 0.109723 | 0.4122 | 0.397251 | Fasn    |
| GO_MF_m:GO:004762acylpyruva   | 1/2529 | 1/23049 | 0.109723 | 0.4122 | 0.397251 | Fahd1   |
| GO_MF_m:GO:004769ATP diphos   | 1/2529 | 1/23049 | 0.109723 | 0.4122 | 0.397251 | Nudt1   |
| GO_MF_m:GO:004772iron-cytoch  | 1/2529 | 1/23049 | 0.109723 | 0.4122 | 0.397251 | Por     |
| GO_MF_m:GO:004777(3S)-citram  | 1/2529 | 1/23049 | 0.109723 | 0.4122 | 0.397251 | Clybl   |
| GO_MF_m:GO:004780L-cysteine:  | 1/2529 | 1/23049 | 0.109723 | 0.4122 | 0.397251 | Got1    |
| GO_MF_m:GO:004782D-glutama    | 1/2529 | 1/23049 | 0.109723 | 0.4122 | 0.397251 | Dglucy  |
| GO_MF_m:GO:004824phytanoyl-   | 1/2529 | 1/23049 | 0.109723 | 0.4122 | 0.397251 | Phyh    |
| GO_MF_m:GO:004827methionine   | 1/2529 | 1/23049 | 0.109723 | 0.4122 | 0.397251 | Mat2b   |
| GO_MF_m:GO:005014nucleoside   | 1/2529 | 1/23049 | 0.109723 | 0.4122 | 0.397251 | Dnph1   |
| GO_MF_m:GO:005018phosphatic   | 1/2529 | 1/23049 | 0.109723 | 0.4122 | 0.397251 | Pgap1   |
| GO_MF_m:GO:005026ribosylpyri  | 1/2529 | 1/23049 | 0.109723 | 0.4122 | 0.397251 | Ung     |
| GO_MF_m:GO:005035triokinase   | 1/2529 | 1/23049 | 0.109723 | 0.4122 | 0.397251 | Tkfc    |
| GO_MF_m:GO:005042calcium-de   | 1/2529 | 1/23049 | 0.109723 | 0.4122 | 0.397251 | Plch1   |
| GO_MF_m:GO:005044aquacobal    | 1/2529 | 1/23049 | 0.109723 | 0.4122 | 0.397251 | Mtrr    |
| GO_MF_m:GO:005052acyloxyacyl  | 1/2529 | 1/23049 | 0.109723 | 0.4122 | 0.397251 | Aoah    |
| GO_MF_m:GO:005174UTP-mono     | 1/2529 | 1/23049 | 0.109723 | 0.4122 | 0.397251 | Ugp2    |
| GO_MF_m:GO:005178all-trans-r  | 1/2529 | 1/23049 | 0.109723 | 0.4122 | 0.397251 | Retsat  |
| GO_MF_m:GO:005190S-(hydroxy   | 1/2529 | 1/23049 | 0.109723 | 0.4122 | 0.397251 | Adh5    |
| GO_MF_m:GO:005195squalene s   | 1/2529 | 1/23049 | 0.109723 | 0.4122 | 0.397251 | Fdft1   |
| GO_MF_m:GO:005238tRNA dime    | 1/2529 | 1/23049 | 0.109723 | 0.4122 | 0.397251 | Trit1   |
| GO_MF_m:GO:005255diamine ox   | 1/2529 | 1/23049 | 0.109723 | 0.4122 | 0.397251 | Aoc1    |
| GO_MF_m:GO:005259histamine    | 1/2529 | 1/23049 | 0.109723 | 0.4122 | 0.397251 | Aoc1    |
| GO_MF_m:GO:005259methylputr   | 1/2529 | 1/23049 | 0.109723 | 0.4122 | 0.397251 | Aoc1    |
| GO_MF_m:GO:005260propane-1    | 1/2529 | 1/23049 | 0.109723 | 0.4122 | 0.397251 | Aoc1    |
| GO_MF_m:GO:005282DNA-7-m      | 1/2529 | 1/23049 | 0.109723 | 0.4122 | 0.397251 | Mpg     |
| GO_MF_m:GO:005282DNA-3-m      | 1/2529 | 1/23049 | 0.109723 | 0.4122 | 0.397251 | Mpg     |
| GO_MF_m:GO:005285peptidyl-ly  | 1/2529 | 1/23049 | 0.109723 | 0.4122 | 0.397251 | Naa50   |
| GO_MF_m:GO:006070deoxyribor   | 1/2529 | 1/23049 | 0.109723 | 0.4122 | 0.397251 | Dffa    |
| GO_MF_m:GO:006150cyclic-GMF   | 1/2529 | 1/23049 | 0.109723 | 0.4122 | 0.397251 | Mb21d1  |
| GO_MF_m:GO:006150cyclic-GMF   | 1/2529 | 1/23049 | 0.109723 | 0.4122 | 0.397251 | Tmem173 |
| GO_MF_m:GO:0061543-demethy    | 1/2529 | 1/23049 | 0.109723 | 0.4122 | 0.397251 | Coq3    |
| GO_MF_m:GO:006154glycogen s   | 1/2529 | 1/23049 | 0.109723 | 0.4122 | 0.397251 | Gys1    |
| GO_MF_m:GO:006159molybdopt    | 1/2529 | 1/23049 | 0.109723 | 0.4122 | 0.397251 | Gphn    |
| GO_MF_m:GO:006159molybdopt    | 1/2529 | 1/23049 | 0.109723 | 0.4122 | 0.397251 | Gphn    |
| GO_MF_m:GO:007000serine-typ   | 1/2529 | 1/23049 | 0.109723 | 0.4122 | 0.397251 | F11     |
| GO_MF_m:GO:0070265'-tyrosyl-l | 1/2529 | 1/23049 | 0.109723 | 0.4122 | 0.397251 | Tdp2    |
| GO_MF_m:GO:007032inward rect  | 1/2529 | 1/23049 | 0.109723 | 0.4122 | 0.397251 | Cav1    |
| GO_MF_m:GO:00705211-beta-hy   | 1/2529 | 1/23049 | 0.109723 | 0.4122 | 0.397251 | Hsd11b1 |
| GO_MF_m:GO:007055nicotinic ac | 1/2529 | 1/23049 | 0.109723 | 0.4122 | 0.397251 | Hcar2   |
| GO_MF_m:GO:007061histone me   | 1/2529 | 1/23049 | 0.109723 | 0.4122 | 0.397251 | Prmt6   |
| GO_MF_m:GO:007061histone me   | 1/2529 | 1/23049 | 0.109723 | 0.4122 | 0.397251 | Prmt6   |
| GO_MF_m:GO:007069deoxyribor   | 1/2529 | 1/23049 | 0.109723 | 0.4122 | 0.397251 | Dnph1   |

|                    |              |         |           |          |          |          |             |
|--------------------|--------------|---------|-----------|----------|----------|----------|-------------|
| GO_MF_mf:GO:007073 | protein adk  | 1/2529  | 1/23049   | 0.109723 | 0.4122   | 0.397251 | Ficd        |
| GO_MF_mf:GO:007077 | phytoceran   | 1/2529  | 1/23049   | 0.109723 | 0.4122   | 0.397251 | Acer3       |
| GO_MF_mf:GO:007089 | lipoteichoic | 1/2529  | 1/23049   | 0.109723 | 0.4122   | 0.397251 | Cd36        |
| GO_MF_mf:GO:007179 | K11-linked   | 1/2529  | 1/23049   | 0.109723 | 0.4122   | 0.397251 | Mindy2      |
| GO_MF_mf:GO:007259 | citrate-L-g  | 1/2529  | 1/23049   | 0.109723 | 0.4122   | 0.397251 | Rimklb      |
| GO_MF_mf:GO:009762 | monoamin     | 1/2529  | 1/23049   | 0.109723 | 0.4122   | 0.397251 | Rnls        |
| GO_MF_mf:GO:009768 | iron chann   | 1/2529  | 1/23049   | 0.109723 | 0.4122   | 0.397251 | Slc40a1     |
| GO_MF_mf:GO:009903 | ceramide-t   | 1/2529  | 1/23049   | 0.109723 | 0.4122   | 0.397251 | Abcb1a      |
| GO_MF_mf:GO:010213 | 3-oxo-glut   | 1/2529  | 1/23049   | 0.109723 | 0.4122   | 0.397251 | Fasn        |
| GO_MF_mf:GO:010213 | 3-oxo-pim    | 1/2529  | 1/23049   | 0.109723 | 0.4122   | 0.397251 | Fasn        |
| GO_MF_mf:GO:010239 | mycophen     | 1/2529  | 1/23049   | 0.109723 | 0.4122   | 0.397251 | Abhd10      |
| GO_MF_mf:GO:010607 | peptide N-   | 1/2529  | 1/23049   | 0.109723 | 0.4122   | 0.397251 | Kat2a       |
| GO_MF_mf:GO:010607 | histone suc  | 1/2529  | 1/23049   | 0.109723 | 0.4122   | 0.397251 | Kat2a       |
| GO_MF_mf:GO:015002 | oxidised lo  | 1/2529  | 1/23049   | 0.109723 | 0.4122   | 0.397251 | Cd36        |
| GO_MF_mf:GO:190401 | platinum b   | 1/2529  | 1/23049   | 0.109723 | 0.4122   | 0.397251 | Rida        |
| GO_MF_mf:GO:190401 | xenon ator   | 1/2529  | 1/23049   | 0.109723 | 0.4122   | 0.397251 | Rida        |
| GO_MF_mf:GO:199016 | single-strai | 1/2529  | 1/23049   | 0.109723 | 0.4122   | 0.397251 | Aptx        |
| GO_MF_mf:GO:199044 | F-box dom    | 1/2529  | 1/23049   | 0.109723 | 0.4122   | 0.397251 | Park2       |
| GO_MF_mf:GO:199059 | mast cell s  | 1/2529  | 1/23049   | 0.109723 | 0.4122   | 0.397251 | Mrgprx2     |
| GO_MF_mf:GO:199082 | deaminase    | 1/2529  | 1/23049   | 0.109723 | 0.4122   | 0.397251 | Hnrnpc      |
| GO_MF_mf:GO:200106 | mannan bil   | 1/2529  | 1/23049   | 0.109723 | 0.4122   | 0.397251 | Reg4        |
| GO_MF_mf:GO:003256 | guanyl ribc  | 48/2529 | 366/23049 | 0.109723 | 0.4122   | 0.397251 | Adss/Arf5/  |
| GO_MF_mf:GO:003321 | amide binc   | 45/2529 | 341/23049 | 0.109958 | 0.4122   | 0.397251 | Adcyap1r1   |
| GO_MF_mf:GO:007027 | vitamin B6   | 9/2529  | 52/23049  | 0.111091 | 0.4122   | 0.397251 | Abat/Gldc/  |
| GO_MF_mf:GO:000402 | 3-chloroall  | 3/2529  | 11/23049  | 0.111323 | 0.4122   | 0.397251 | Aldh1a3/Al  |
| GO_MF_mf:GO:000459 | peptide al   | 3/2529  | 11/23049  | 0.111323 | 0.4122   | 0.397251 | Naa10/Na    |
| GO_MF_mf:GO:000486 | protein ser  | 3/2529  | 11/23049  | 0.111323 | 0.4122   | 0.397251 | Ppp1r14a/l  |
| GO_MF_mf:GO:000496 | galanin rec  | 3/2529  | 11/23049  | 0.111323 | 0.4122   | 0.397251 | Cysltr2/Gal |
| GO_MF_mf:GO:001517 | basic amin   | 3/2529  | 11/23049  | 0.111323 | 0.4122   | 0.397251 | AU018091/   |
| GO_MF_mf:GO:001677 | phosphotr    | 3/2529  | 11/23049  | 0.111323 | 0.4122   | 0.397251 | Ckm/Ckmt    |
| GO_MF_mf:GO:001685 | racemase     | 3/2529  | 11/23049  | 0.111323 | 0.4122   | 0.397251 | Dse/Dsel/R  |
| GO_MF_mf:GO:001920 | carbohydr    | 3/2529  | 11/23049  | 0.111323 | 0.4122   | 0.397251 | G6pc2/Pfkf  |
| GO_MF_mf:GO:003089 | actin-depe   | 3/2529  | 11/23049  | 0.111323 | 0.4122   | 0.397251 | Myh14/My    |
| GO_MF_mf:GO:003445 | ubiquitin-l  | 3/2529  | 11/23049  | 0.111323 | 0.4122   | 0.397251 | Prpf19/Ube  |
| GO_MF_mf:GO:004230 | phosphate    | 3/2529  | 11/23049  | 0.111323 | 0.4122   | 0.397251 | Gng12/Otc   |
| GO_MF_mf:GO:005510 | lipase inh   | 3/2529  | 11/23049  | 0.111323 | 0.4122   | 0.397251 | Angptl3/Ar  |
| GO_MF_mf:GO:010601 | phosphatic   | 3/2529  | 11/23049  | 0.111323 | 0.4122   | 0.397251 | Ptpmt1/Sy   |
| GO_MF_mf:GO:001713 | Rab GTPas    | 23/2529 | 161/23049 | 0.113    | 0.417607 | 0.402461 | Ankfy1/An   |
| GO_MF_mf:GO:005108 | unfolded p   | 14/2529 | 90/23049  | 0.113295 | 0.417607 | 0.402461 | Calr/Canx/  |
| GO_MF_mf:GO:001900 | guanyl nuc   | 48/2529 | 367/23049 | 0.113364 | 0.417607 | 0.402461 | Adss/Arf5/  |
| GO_MF_mf:GO:001676 | transferase  | 5/2529  | 24/23049  | 0.115403 | 0.423668 | 0.408303 | Abat/Bcat2  |
| GO_MF_mf:GO:003056 | cAMP bind    | 5/2529  | 24/23049  | 0.115403 | 0.423668 | 0.408303 | Cnbd2/Cng   |
| GO_MF_mf:GO:003055 | cyclic nucle | 7/2529  | 38/23049  | 0.116601 | 0.426613 | 0.41114  | Cnbd2/Cng   |
| GO_MF_mf:GO:005153 | 4 iron, 4 su | 7/2529  | 38/23049  | 0.116601 | 0.426613 | 0.41114  | Dpyd/Isca2  |
| GO_MF_mf:GO:001517 | L-amino ac   | 10/2529 | 60/23049  | 0.116958 | 0.427196 | 0.411702 | AU018091/   |
| GO_MF_mf:GO:000851 | ammonium     | 6/2529  | 31/23049  | 0.11741  | 0.427395 | 0.411894 | Rhd/Slc12a  |
| GO_MF_mf:GO:006198 | regulatory   | 6/2529  | 31/23049  | 0.11741  | 0.427395 | 0.411894 | Ddx21/Fmr   |
| GO_MF_mf:GO:004262 | ATPase act   | 49/2529 | 377/23049 | 0.119347 | 0.433715 | 0.417985 | Abca12/Ab   |



|                                      |           |          |          |          |             |
|--------------------------------------|-----------|----------|----------|----------|-------------|
| GO_MF_mf:GO:000452endoribont9/2529   | 53/23049  | 0.121516 | 0.440252 | 0.424285 | Cpsf4/Elac1 |
| GO_MF_mf:GO:000552GTP bindin45/2529  | 344/23049 | 0.121554 | 0.440252 | 0.424285 | Adss/Arf5/  |
| GO_MF_mf:GO:000372mRNA binc31/2529   | 228/23049 | 0.123053 | 0.444932 | 0.428795 | Apobec1/C   |
| GO_MF_mf:GO:001526calcium-ac4/2529   | 18/23049  | 0.127204 | 0.457637 | 0.441039 | Kcnmb1/Kc   |
| GO_MF_mf:GO:001664oxidoreduc4/2529   | 18/23049  | 0.127204 | 0.457637 | 0.441039 | Aoc1/Aoc3   |
| GO_MF_mf:GO:003279GTPase act4/2529   | 18/23049  | 0.127204 | 0.457637 | 0.441039 | Camk2a/Cc   |
| GO_MF_mf:GO:000554phospholip51/2529  | 396/23049 | 0.12752  | 0.458011 | 0.4414   | Ankfy1/An   |
| GO_MF_mf:GO:000551calmodulin26/2529  | 188/23049 | 0.128233 | 0.459805 | 0.443129 | Atp2b4/Ca   |
| GO_MF_mf:GO:001593nucleobase7/2529   | 39/23049  | 0.129417 | 0.46087  | 0.444155 | Slc25a23/S  |
| GO_MF_mf:GO:000373mRNA 3'-L11/2529   | 69/23049  | 0.13095  | 0.46087  | 0.444155 | Cpeb3/Cpe   |
| GO_MF_mf:GO:004302ribonucleo20/2529  | 140/23049 | 0.132128 | 0.46087  | 0.444155 | Apobec1/C   |
| GO_MF_mf:GO:000395NAD(P)+-r2/2529    | 6/23049   | 0.133877 | 0.46087  | 0.444155 | Art1/Art5   |
| GO_MF_mf:GO:000402alcohol del2/2529  | 6/23049   | 0.133877 | 0.46087  | 0.444155 | Adh1/Adh5   |
| GO_MF_mf:GO:000444isocitrate d2/2529 | 6/23049   | 0.133877 | 0.46087  | 0.444155 | Idh2/Idh3a  |
| GO_MF_mf:GO:000507transformir2/2529  | 6/23049   | 0.133877 | 0.46087  | 0.444155 | Smad6/Sm    |
| GO_MF_mf:GO:000537copper ion2/2529   | 6/23049   | 0.133877 | 0.46087  | 0.444155 | Atp7b/Slc3  |
| GO_MF_mf:GO:000813primary arr2/2529  | 6/23049   | 0.133877 | 0.46087  | 0.444155 | Aoc1/Aoc3   |
| GO_MF_mf:GO:000855xenobiotic2/2529   | 6/23049   | 0.133877 | 0.46087  | 0.444155 | Abcb1a/Ab   |
| GO_MF_mf:GO:000897phosphatic2/2529   | 6/23049   | 0.133877 | 0.46087  | 0.444155 | Abhd1/Pla   |
| GO_MF_mf:GO:001512lactate tran2/2529 | 6/23049   | 0.133877 | 0.46087  | 0.444155 | Slc16a1/Slc |
| GO_MF_mf:GO:001640carnitine O2/2529  | 6/23049   | 0.133877 | 0.46087  | 0.444155 | Cpt2/Crot   |
| GO_MF_mf:GO:001642CoA carbo2/2529    | 6/23049   | 0.133877 | 0.46087  | 0.444155 | Mccc2/Pcc   |
| GO_MF_mf:GO:001643rRNA (guar2/2529   | 6/23049   | 0.133877 | 0.46087  | 0.444155 | Ftsj3/Mrm1  |
| GO_MF_mf:GO:001663oxidoreduc2/2529   | 6/23049   | 0.133877 | 0.46087  | 0.444155 | Sdhaf4/Sdf  |
| GO_MF_mf:GO:001681hydrolase e2/2529  | 6/23049   | 0.133877 | 0.46087  | 0.444155 | Dpys/Urah   |
| GO_MF_mf:GO:001921phosphata2/2529    | 6/23049   | 0.133877 | 0.46087  | 0.444155 | Igfbp3/Ptp  |
| GO_MF_mf:GO:003024guanylate r2/2529  | 6/23049   | 0.133877 | 0.46087  | 0.444155 | Guca1a/Gu   |
| GO_MF_mf:GO:0035315'-3' exode2/2529  | 6/23049   | 0.133877 | 0.46087  | 0.444155 | Aptx/Dclre  |
| GO_MF_mf:GO:003640proteasom2/2529    | 6/23049   | 0.133877 | 0.46087  | 0.444155 | Psmc2/Psr   |
| GO_MF_mf:GO:003813neuregulin2/2529   | 6/23049   | 0.133877 | 0.46087  | 0.444155 | Erbp3/Itgal |
| GO_MF_mf:GO:004354molybdopt2/2529    | 6/23049   | 0.133877 | 0.46087  | 0.444155 | Gphn/Suox   |
| GO_MF_mf:GO:0047181-acylglyce2/2529  | 6/23049   | 0.133877 | 0.46087  | 0.444155 | Lpcat3/Lpc  |
| GO_MF_mf:GO:199094ubiquitin li2/2529 | 6/23049   | 0.133877 | 0.46087  | 0.444155 | Fbxo5/Rpl2  |
| GO_MF_mf:GO:000188nucleoside47/2529  | 364/23049 | 0.13453  | 0.462381 | 0.445612 | Adora1/Ad   |
| GO_MF_mf:GO:000827protein me13/2529  | 85/23049  | 0.136112 | 0.464417 | 0.447573 | Ash2l/Eef2l |
| GO_MF_mf:GO:000090translation3/2529  | 12/23049  | 0.136847 | 0.464417 | 0.447573 | Cpeb3/Cpe   |
| GO_MF_mf:GO:000819metalloenc3/2529   | 12/23049  | 0.136847 | 0.464417 | 0.447573 | Fetub/Tim   |
| GO_MF_mf:GO:001565quaternary3/2529   | 12/23049  | 0.136847 | 0.464417 | 0.447573 | Slc22a1/Slc |
| GO_MF_mf:GO:001680hydrolase e3/2529  | 12/23049  | 0.136847 | 0.464417 | 0.447573 | Ahcyl2/Eph  |
| GO_MF_mf:GO:004302ribosomal l3/2529  | 12/23049  | 0.136847 | 0.464417 | 0.447573 | Nemf/Nmc    |
| GO_MF_mf:GO:004302ribosomal r3/2529  | 12/23049  | 0.136847 | 0.464417 | 0.447573 | Eral1/Ptcd  |
| GO_MF_mf:GO:004840platelet-de3/2529  | 12/23049  | 0.136847 | 0.464417 | 0.447573 | Col5a1/Pdq  |
| GO_MF_mf:GO:001679thiolester h8/2529 | 47/23049  | 0.137863 | 0.46713  | 0.450188 | Acot1/Acoi  |
| GO_MF_mf:GO:003255purine ribo45/2529 | 349/23049 | 0.142556 | 0.482275 | 0.464784 | Adss/Arf5/  |
| GO_MF_mf:GO:000417aminopept7/2529    | 40/23049  | 0.142903 | 0.482691 | 0.465185 | Blmh/Ctsl/l |
| GO_MF_mf:GO:001919transmemt12/2529   | 78/23049  | 0.143419 | 0.483676 | 0.466134 | Epha10/Ep   |
| GO_MF_mf:GO:000802monocarbc9/2529    | 55/23049  | 0.143876 | 0.484457 | 0.466886 | Abcc3/Mpc   |
| GO_MF_mf:GO:001675transferase27/2529 | 199/23049 | 0.144444 | 0.485613 | 0.468    | A4gnt/Abo   |

|                                |          |           |          |          |          |             |
|--------------------------------|----------|-----------|----------|----------|----------|-------------|
| GO_MF_mf:GO:000534organic aci  | 21/2529  | 150/23049 | 0.145188 | 0.485859 | 0.468237 | Abcc3/AUC   |
| GO_MF_mf:GO:004694carboxylic   | 21/2529  | 150/23049 | 0.145188 | 0.485859 | 0.468237 | Abcc3/AUC   |
| GO_MF_mf:GO:001665oxidoreduc   | 13/2529  | 86/23049  | 0.145194 | 0.485859 | 0.468237 | Aifm1/Cbr2  |
| GO_MF_mf:GO:000850anion trans  | 41/2529  | 316/23049 | 0.145824 | 0.486895 | 0.469237 | Abcc3/Ank   |
| GO_MF_mf:GO:001523drug transr  | 15/2529  | 102/23049 | 0.147053 | 0.486895 | 0.469237 | Abcb1a/At   |
| GO_MF_mf:GO:000196G-protein    | 6/2529   | 33/23049  | 0.147087 | 0.486895 | 0.469237 | Drd5/Gria1  |
| GO_MF_mf:GO:000436glutathione  | 6/2529   | 33/23049  | 0.147087 | 0.486895 | 0.469237 | Gstk1/Gstn  |
| GO_MF_mf:GO:005101mitogen-a    | 6/2529   | 33/23049  | 0.147087 | 0.486895 | 0.469237 | Gch1/Mica   |
| GO_MF_mf:GO:000514interleukin  | 4/2529   | 19/23049  | 0.147892 | 0.486895 | 0.469237 | Grin2b/Il1r |
| GO_MF_mf:GO:000510fibroblast   | c5/2529  | 26/23049  | 0.149454 | 0.486895 | 0.469237 | Fgf1/Fgf16  |
| GO_MF_mf:GO:000997cyclase acti | 5/2529   | 26/23049  | 0.149454 | 0.486895 | 0.469237 | Dglucy/Ad   |
| GO_MF_mf:GO:001702TBP-class    | r5/2529  | 26/23049  | 0.149454 | 0.486895 | 0.469237 | Cand1/Gtf2  |
| GO_MF_mf:GO:007194FAD bindin   | 5/2529   | 26/23049  | 0.149454 | 0.486895 | 0.469237 | Aifm1/Ddo   |
| GO_MF_mf:GO:005265carboxylic   | 22/2529  | 159/23049 | 0.151058 | 0.486895 | 0.469237 | Abhd1/Abf   |
| GO_MF_mf:GO:001690oxidoreduc   | 9/2529   | 56/23049  | 0.155783 | 0.486895 | 0.469237 | Adh5/Aldh   |
| GO_MF_mf:GO:004836Rac GTPas    | 10/2529  | 64/23049  | 0.159419 | 0.486895 | 0.469237 | Arhgap44/   |
| GO_MF_mf:GO:000815UDP-glyco    | 20/2529  | 144/23049 | 0.160607 | 0.486895 | 0.469237 | A4gnt/Abo   |
| GO_MF_mf:GO:000520structural   | c11/2529 | 72/23049  | 0.161863 | 0.486895 | 0.469237 | Des/Epb41   |
| GO_MF_mf:GO:000905electron tr  | 11/2529  | 72/23049  | 0.161863 | 0.486895 | 0.469237 | Aifm1/Aifm  |
| GO_MF_mf:GO:001517neutral am   | 6/2529   | 34/23049  | 0.163076 | 0.486895 | 0.469237 | Serinc2/Sei |
| GO_MF_mf:GO:003035cyclin bindi | 6/2529   | 34/23049  | 0.163076 | 0.486895 | 0.469237 | Cdk1/Cdk2   |
| GO_MF_mf:GO:003376steroid def  | 6/2529   | 34/23049  | 0.163076 | 0.486895 | 0.469237 | Akr1c12/H:  |
| GO_MF_mf:GO:007056adenylyltra  | 6/2529   | 34/23049  | 0.163076 | 0.486895 | 0.469237 | Aptx/Ficd/( |
| GO_MF_mf:GO:004802monosacch    | 12/2529  | 80/23049  | 0.16342  | 0.486895 | 0.469237 | Cd209d/Eg   |
| GO_MF_mf:GO:000453poly(A)-sp   | 3/2529   | 13/23049  | 0.164117 | 0.486895 | 0.469237 | Noct/Cnotf  |
| GO_MF_mf:GO:000524gap junctio  | 3/2529   | 13/23049  | 0.164117 | 0.486895 | 0.469237 | Gja3/Gjb2/  |
| GO_MF_mf:GO:001665oxidoreduc   | 3/2529   | 13/23049  | 0.164117 | 0.486895 | 0.469237 | Cox15/Mtr   |
| GO_MF_mf:GO:003354MAP kinas    | 3/2529   | 13/23049  | 0.164117 | 0.486895 | 0.469237 | Dusp3/Dus   |
| GO_MF_mf:GO:003592mRNA 3'-L    | 3/2529   | 13/23049  | 0.164117 | 0.486895 | 0.469237 | Cpeb3/Khs   |
| GO_MF_mf:GO:005137serotonin    | t3/2529  | 13/23049  | 0.164117 | 0.486895 | 0.469237 | Htr1a/Htr5  |
| GO_MF_mf:GO:009715cysteine-ty  | 3/2529   | 13/23049  | 0.164117 | 0.486895 | 0.469237 | Casp6/Casp  |
| GO_MF_mf:GO:003254ribonucleo   | 45/2529  | 354/23049 | 0.165635 | 0.486895 | 0.469237 | Adss/Arf5/  |
| GO_MF_mf:GO:001664oxidoreduc   | 5/2529   | 27/23049  | 0.167891 | 0.486895 | 0.469237 | Aifm1/Aifm  |
| GO_MF_mf:GO:003074GTP-deper    | 5/2529   | 27/23049  | 0.167891 | 0.486895 | 0.469237 | Gch1/Mras   |
| GO_MF_mf:GO:001508calcium ior  | 19/2529  | 137/23049 | 0.169623 | 0.486895 | 0.469237 | Atp2b4/Ca   |
| GO_MF_mf:GO:000161purinergic   | 4/2529   | 20/23049  | 0.169766 | 0.486895 | 0.469237 | Hcar2/P2rx  |
| GO_MF_mf:GO:000826poly(U) RN   | 4/2529   | 20/23049  | 0.169766 | 0.486895 | 0.469237 | Fmr1/Hnrr   |
| GO_MF_mf:GO:001650nucleotide   | 4/2529   | 20/23049  | 0.169766 | 0.486895 | 0.469237 | Hcar2/P2rx  |
| GO_MF_mf:GO:000813protein tyr  | 7/2529   | 42/23049  | 0.171766 | 0.486895 | 0.469237 | Dusp16/Du   |
| GO_MF_mf:GO:000837O-acyltran   | 7/2529   | 42/23049  | 0.171766 | 0.486895 | 0.469237 | Agpat2/Cp   |
| GO_MF_mf:GO:000006L-ornithine  | 2/2529   | 7/23049   | 0.174277 | 0.486895 | 0.469237 | AU018091/   |
| GO_MF_mf:GO:000374translation  | 2/2529   | 7/23049   | 0.174277 | 0.486895 | 0.469237 | Gspt2/Mtrf  |
| GO_MF_mf:GO:000443phosphatic   | 2/2529   | 7/23049   | 0.174277 | 0.486895 | 0.469237 | Ptpmt1/Sy   |
| GO_MF_mf:GO:000500GPI-linked   | 2/2529   | 7/23049   | 0.174277 | 0.486895 | 0.469237 | Epha7/Eph   |
| GO_MF_mf:GO:000807translation  | 2/2529   | 7/23049   | 0.174277 | 0.486895 | 0.469237 | Gspt2/Mtrf  |
| GO_MF_mf:GO:000844phosphofru   | 2/2529   | 7/23049   | 0.174277 | 0.486895 | 0.469237 | Pfkfb1/Pfkl |
| GO_MF_mf:GO:000850bile acid:so | 2/2529   | 7/23049   | 0.174277 | 0.486895 | 0.469237 | Slc10a4/Slc |
| GO_MF_mf:GO:001085cyclase reg  | 2/2529   | 7/23049   | 0.174277 | 0.486895 | 0.469237 | Guca1a/Gu   |

|                                         |           |          |          |          |             |
|-----------------------------------------|-----------|----------|----------|----------|-------------|
| GO_MF_mf:GO:001522 carnitine tr 2/2529  | 7/23049   | 0.174277 | 0.486895 | 0.469237 | Slc22a5/Slc |
| GO_MF_mf:GO:001642 tRNA (cyto 2/2529    | 7/23049   | 0.174277 | 0.486895 | 0.469237 | Mettl6/Nsu  |
| GO_MF_mf:GO:001923 cyclohydro 2/2529    | 7/23049   | 0.174277 | 0.486895 | 0.469237 | Gch1/Mthf   |
| GO_MF_mf:GO:001979 procollagen 2/2529   | 7/23049   | 0.174277 | 0.486895 | 0.469237 | P3h3/P4ha   |
| GO_MF_mf:GO:003168 adenosine 2/2529     | 7/23049   | 0.174277 | 0.486895 | 0.469237 | P2ry1/P2ry  |
| GO_MF_mf:GO:003433 short-chair 2/2529   | 7/23049   | 0.174277 | 0.486895 | 0.469237 | Abhd1/Sia   |
| GO_MF_mf:GO:003518 histone thr 2/2529   | 7/23049   | 0.174277 | 0.486895 | 0.469237 | Pkn1/Prkca  |
| GO_MF_mf:GO:005029 sphingosin 2/2529    | 7/23049   | 0.174277 | 0.486895 | 0.469237 | Cers3/Cers  |
| GO_MF_mf:GO:005065 3'-phospho 2/2529    | 7/23049   | 0.174277 | 0.486895 | 0.469237 | Sult1a1/Su  |
| GO_MF_mf:GO:007032 thyroid hor 2/2529   | 7/23049   | 0.174277 | 0.486895 | 0.469237 | Aldh1a3/Tt  |
| GO_MF_mf:GO:007069 activin rece 2/2529  | 7/23049   | 0.174277 | 0.486895 | 0.469237 | Cfc1/Smad   |
| GO_MF_mf:GO:009732 7SK snRNA 2/2529     | 7/23049   | 0.174277 | 0.486895 | 0.469237 | Ddx21/Hex   |
| GO_MF_mf:GO:199024 N6-methyl 2/2529     | 7/23049   | 0.174277 | 0.486895 | 0.469237 | Hnrnpc/Yth  |
| GO_MF_mf:GO:005101 protein kin 8/2529   | 50/23049  | 0.177381 | 0.486895 | 0.469237 | Akap14/Ak   |
| GO_MF_mf:GO:000553 glycosamin 26/2529   | 196/23049 | 0.178187 | 0.486895 | 0.469237 | 2300002M.   |
| GO_MF_mf:GO:001711 Rab guany 6/2529     | 35/23049  | 0.179768 | 0.486895 | 0.469237 | Dennd4b/L   |
| GO_MF_mf:GO:004302 ribosome t 9/2529    | 58/23049  | 0.180964 | 0.486895 | 0.469237 | Cpeb3/Cpe   |
| GO_MF_mf:GO:003097 receptor ty 10/2529  | 66/23049  | 0.183138 | 0.486895 | 0.469237 | Dock4/Elm   |
| GO_MF_mf:GO:004237 chemokine 10/2529    | 66/23049  | 0.183138 | 0.486895 | 0.469237 | Ccl20/Ccl2  |
| GO_MF_mf:GO:000512 cytokine ac 29/2529  | 222/23049 | 0.184097 | 0.486895 | 0.469237 | Bmp3/Ccl2   |
| GO_MF_mf:GO:000851 organic ani 29/2529  | 222/23049 | 0.184097 | 0.486895 | 0.469237 | Abcc3/Atpi  |
| GO_MF_mf:GO:005111 ATPase bin 13/2529   | 90/23049  | 0.184611 | 0.486895 | 0.469237 | Atp1b2/Ca   |
| GO_MF_mf:GO:000520 extracellula 7/2529  | 43/23049  | 0.187072 | 0.486895 | 0.469237 | Ambn/Col1   |
| GO_MF_mf:GO:001670 oxidoreduc 5/2529    | 28/23049  | 0.187162 | 0.486895 | 0.469237 | Alox12/Alo  |
| GO_MF_mf:GO:001540 P-P-bond- 17/2529    | 123/23049 | 0.189661 | 0.486895 | 0.469237 | Abca12/Ab   |
| GO_MF_mf:GO:000512 cytokine re 41/2529  | 325/23049 | 0.191827 | 0.486895 | 0.469237 | Amh/Bmp3    |
| GO_MF_mf:GO:000187 pattern bin 4/2529   | 21/23049  | 0.192678 | 0.486895 | 0.469237 | Clec4g/Enf  |
| GO_MF_mf:GO:000837 sialyltransf 4/2529  | 21/23049  | 0.192678 | 0.486895 | 0.469237 | St3gal3/St  |
| GO_MF_mf:GO:002282 wide pore 4/2529     | 21/23049  | 0.192678 | 0.486895 | 0.469237 | Gja3/Gjb2/  |
| GO_MF_mf:GO:003024 polysaccha 4/2529    | 21/23049  | 0.192678 | 0.486895 | 0.469237 | Clec4g/Enf  |
| GO_MF_mf:GO:007069 transmemk 4/2529     | 21/23049  | 0.192678 | 0.486895 | 0.469237 | Bmp3/Cfc1   |
| GO_MF_mf:GO:000465 prenyltrans 3/2529   | 14/23049  | 0.192811 | 0.486895 | 0.469237 | Fdft1/Fnta/ |
| GO_MF_mf:GO:000552 macrolide l 3/2529   | 14/23049  | 0.192811 | 0.486895 | 0.469237 | Fkbp11/Fkl  |
| GO_MF_mf:GO:000552 FK506 binc 3/2529    | 14/23049  | 0.192811 | 0.486895 | 0.469237 | Fkbp11/Fkl  |
| GO_MF_mf:GO:001649 C-C chemc 3/2529     | 14/23049  | 0.192811 | 0.486895 | 0.469237 | Ccr1/Ccr1/2 |
| GO_MF_mf:GO:001910 DNA N-gly 3/2529     | 14/23049  | 0.192811 | 0.486895 | 0.469237 | Mpg/Pcna/   |
| GO_MF_mf:GO:004529 gamma-ca 3/2529      | 14/23049  | 0.192811 | 0.486895 | 0.469237 | Cdh1/Cdh2   |
| GO_MF_mf:GO:001995 cytokine bi 15/2529  | 107/23049 | 0.192859 | 0.486895 | 0.469237 | Ccr1/Cd36.  |
| GO_MF_mf:GO:004256 hormone b 15/2529    | 107/23049 | 0.192859 | 0.486895 | 0.469237 | Ache/Adipi  |
| GO_MF_mf:GO:004349 ATPase act 18/2529   | 132/23049 | 0.196625 | 0.486895 | 0.469237 | Abca12/Ab   |
| GO_MF_mf:GO:001662 oxidoreduc 7/2529    | 44/23049  | 0.20291  | 0.486895 | 0.469237 | Adh5/Aldh   |
| GO_MF_mf:GO:001802 histone-lys 7/2529   | 44/23049  | 0.20291  | 0.486895 | 0.469237 | Ash2l/Ezh1  |
| GO_MF_mf:GO:005121 phosphopr 14/2529    | 100/23049 | 0.204517 | 0.486895 | 0.469237 | Abl2/Aptx/  |
| GO_MF_mf:GO:003509 phosphatic 31/2529   | 242/23049 | 0.204613 | 0.486895 | 0.469237 | Ankfy1/An   |
| GO_MF_mf:GO:014009 catalytic ac 24/2529 | 183/23049 | 0.205226 | 0.486895 | 0.469237 | Aplf/Aptx/f |
| GO_MF_mf:GO:000165 peptide rec 18/2529  | 133/23049 | 0.205589 | 0.486895 | 0.469237 | Avpr1a/Cal  |
| GO_MF_mf:GO:003149 chromatin 13/2529    | 92/23049  | 0.206049 | 0.486895 | 0.469237 | Cenpa/Clo   |
| GO_MF_mf:GO:001683 hydro-lyas 8/2529    | 52/23049  | 0.206188 | 0.486895 | 0.469237 | Dglucy/Api  |

|                    |                     |          |          |          |          |              |
|--------------------|---------------------|----------|----------|----------|----------|--------------|
| GO_MF_mf:GO:000524 | calcium ch:5/2529   | 29/23049 | 0.207179 | 0.486895 | 0.469237 | Cacnb2/Ca    |
| GO_MF_mf:GO:000552 | insulin-like 5/2529 | 29/23049 | 0.207179 | 0.486895 | 0.469237 | Ctgf/Igf2r/I |
| GO_MF_mf:GO:00167C | oxidoreduc 5/2529   | 29/23049 | 0.207179 | 0.486895 | 0.469237 | Alox12/Alo   |
| GO_MF_mf:GO:004301 | gamma-tu 5/2529     | 29/23049 | 0.207179 | 0.486895 | 0.469237 | Ndn/Pde4k    |
| GO_MF_mf:GO:000003 | acyl bindin 1/2529  | 2/23049  | 0.207411 | 0.486895 | 0.469237 | Zfp593       |
| GO_MF_mf:GO:000003 | acyl carrier 1/2529 | 2/23049  | 0.207411 | 0.486895 | 0.469237 | Zfp593       |
| GO_MF_mf:GO:00004C | heterodupl 1/2529   | 2/23049  | 0.207411 | 0.486895 | 0.469237 | Msh3         |
| GO_MF_mf:GO:00004C | double-str:1/2529   | 2/23049  | 0.207411 | 0.486895 | 0.469237 | Msh3         |
| GO_MF_mf:GO:00007C | purine-spe 1/2529   | 2/23049  | 0.207411 | 0.486895 | 0.469237 | Pcna         |
| GO_MF_mf:GO:000103 | RNA polym 1/2529    | 2/23049  | 0.207411 | 0.486895 | 0.469237 | Tbp          |
| GO_MF_mf:GO:000114 | transcriptic 1/2529 | 2/23049  | 0.207411 | 0.486895 | 0.469237 | Xrn2         |
| GO_MF_mf:GO:000116 | transcriptic 1/2529 | 2/23049  | 0.207411 | 0.486895 | 0.469237 | Xrn2         |
| GO_MF_mf:GO:00016C | urotensin II 1/2529 | 2/23049  | 0.207411 | 0.486895 | 0.469237 | Uts2r        |
| GO_MF_mf:GO:000163 | leukotriene 1/2529  | 2/23049  | 0.207411 | 0.486895 | 0.469237 | Ltb4r1       |
| GO_MF_mf:GO:000164 | group II m:1/2529   | 2/23049  | 0.207411 | 0.486895 | 0.469237 | Grm2         |
| GO_MF_mf:GO:00018E | glucuronyl: 1/2529  | 2/23049  | 0.207411 | 0.486895 | 0.469237 | Extl3        |
| GO_MF_mf:GO:000196 | alpha-1,3- 1/2529   | 2/23049  | 0.207411 | 0.486895 | 0.469237 | Abo          |
| GO_MF_mf:GO:000211 | interleukin: 1/2529 | 2/23049  | 0.207411 | 0.486895 | 0.469237 | Il1r1l       |
| GO_MF_mf:GO:000382 | alpha-keto 1/2529   | 2/23049  | 0.207411 | 0.486895 | 0.469237 | Bckdhb       |
| GO_MF_mf:GO:000383 | beta-galac 1/2529   | 2/23049  | 0.207411 | 0.486895 | 0.469237 | St6gal1      |
| GO_MF_mf:GO:000384 | 11-beta-hy 1/2529   | 2/23049  | 0.207411 | 0.486895 | 0.469237 | Hsd11b1      |
| GO_MF_mf:GO:000386 | 3-methyl-2 1/2529   | 2/23049  | 0.207411 | 0.486895 | 0.469237 | Bckdhb       |
| GO_MF_mf:GO:000386 | 4-hydroxy 1/2529    | 2/23049  | 0.207411 | 0.486895 | 0.469237 | Hpd1         |
| GO_MF_mf:GO:00038E | CDP-diacyl 1/2529   | 2/23049  | 0.207411 | 0.486895 | 0.469237 | Tmem269      |
| GO_MF_mf:GO:00038E | D-amino-ε 1/2529    | 2/23049  | 0.207411 | 0.486895 | 0.469237 | Ddo          |
| GO_MF_mf:GO:000393 | GTP cycloh 1/2529   | 2/23049  | 0.207411 | 0.486895 | 0.469237 | Gch1         |
| GO_MF_mf:GO:00039E | UDP-gluco 1/2529    | 2/23049  | 0.207411 | 0.486895 | 0.469237 | Uggt1        |
| GO_MF_mf:GO:00039E | acylphosph 1/2529   | 2/23049  | 0.207411 | 0.486895 | 0.469237 | Acyp1        |
| GO_MF_mf:GO:00040C | copper-ex 1/2529    | 2/23049  | 0.207411 | 0.486895 | 0.469237 | Atp7b        |
| GO_MF_mf:GO:000401 | adenylosuc 1/2529   | 2/23049  | 0.207411 | 0.486895 | 0.469237 | Adss         |
| GO_MF_mf:GO:000402 | L-alanine:2 1/2529  | 2/23049  | 0.207411 | 0.486895 | 0.469237 | Gpt          |
| GO_MF_mf:GO:00040E | arachidona 1/2529   | 2/23049  | 0.207411 | 0.486895 | 0.469237 | Alox5        |
| GO_MF_mf:GO:00040E | arginase ac 1/2529  | 2/23049  | 0.207411 | 0.486895 | 0.469237 | Arg1         |
| GO_MF_mf:GO:00040E | branched-ri 1/2529  | 2/23049  | 0.207411 | 0.486895 | 0.469237 | Bcat2        |
| GO_MF_mf:GO:000414 | dephosphoc 1/2529   | 2/23049  | 0.207411 | 0.486895 | 0.469237 | Dcackd       |
| GO_MF_mf:GO:000416 | dopachron 1/2529    | 2/23049  | 0.207411 | 0.486895 | 0.469237 | Dct          |
| GO_MF_mf:GO:000431 | [acyl-carrie 1/2529 | 2/23049  | 0.207411 | 0.486895 | 0.469237 | Fasn         |
| GO_MF_mf:GO:000431 | 3-oxoacyl- 1/2529   | 2/23049  | 0.207411 | 0.486895 | 0.469237 | Fasn         |
| GO_MF_mf:GO:000432 | oleoyl-[acy 1/2529  | 2/23049  | 0.207411 | 0.486895 | 0.469237 | Fasn         |
| GO_MF_mf:GO:000432 | formate-te 1/2529   | 2/23049  | 0.207411 | 0.486895 | 0.469237 | Mthfd1l      |
| GO_MF_mf:GO:00043E | glutamate- 1/2529   | 2/23049  | 0.207411 | 0.486895 | 0.469237 | Gclm         |
| GO_MF_mf:GO:00043E | glutamine- 1/2529   | 2/23049  | 0.207411 | 0.486895 | 0.469237 | Gfpt2        |
| GO_MF_mf:GO:000437 | glycine hyc 1/2529  | 2/23049  | 0.207411 | 0.486895 | 0.469237 | Shmt1        |
| GO_MF_mf:GO:000437 | glycogen (ε 1/2529  | 2/23049  | 0.207411 | 0.486895 | 0.469237 | Gys1         |
| GO_MF_mf:GO:000442 | hydroxyme 1/2529    | 2/23049  | 0.207411 | 0.486895 | 0.469237 | Hmgcs2       |
| GO_MF_mf:GO:000444 | inositol-1,4 1/2529 | 2/23049  | 0.207411 | 0.486895 | 0.469237 | Bpnt1        |
| GO_MF_mf:GO:00044E | isocitrate d 1/2529 | 2/23049  | 0.207411 | 0.486895 | 0.469237 | Idh2         |
| GO_MF_mf:GO:00044E | mRNA (gu: 1/2529    | 2/23049  | 0.207411 | 0.486895 | 0.469237 | Rnmt         |

|                                |        |         |          |          |          |          |
|--------------------------------|--------|---------|----------|----------|----------|----------|
| GO_MF_m:GO:000448 mRNA (nuc    | 1/2529 | 2/23049 | 0.207411 | 0.486895 | 0.469237 | Cmtr2    |
| GO_MF_m:GO:000448 methylcro    | 1/2529 | 2/23049 | 0.207411 | 0.486895 | 0.469237 | Mccc2    |
| GO_MF_m:GO:000455 alpha,alph   | 1/2529 | 2/23049 | 0.207411 | 0.486895 | 0.469237 | Pgghg    |
| GO_MF_m:GO:000464 phosphose    | 1/2529 | 2/23049 | 0.207411 | 0.486895 | 0.469237 | Psph     |
| GO_MF_m:GO:000465 propionyl-   | 1/2529 | 2/23049 | 0.207411 | 0.486895 | 0.469237 | Pcca     |
| GO_MF_m:GO:000466 protein fan  | 1/2529 | 2/23049 | 0.207411 | 0.486895 | 0.469237 | Fnta     |
| GO_MF_m:GO:000466 CAAX-prot    | 1/2529 | 2/23049 | 0.207411 | 0.486895 | 0.469237 | Fnta     |
| GO_MF_m:GO:000466 prostaglan   | 1/2529 | 2/23049 | 0.207411 | 0.486895 | 0.469237 | Ptgs2    |
| GO_MF_m:GO:000467 DNA-depe     | 1/2529 | 2/23049 | 0.207411 | 0.486895 | 0.469237 | Prkdc    |
| GO_MF_m:GO:000469 calcium-de   | 1/2529 | 2/23049 | 0.207411 | 0.486895 | 0.469237 | Prkca    |
| GO_MF_m:GO:000475 selenide, w  | 1/2529 | 2/23049 | 0.207411 | 0.486895 | 0.469237 | Sephs1   |
| GO_MF_m:GO:000483 tryptophan   | 1/2529 | 2/23049 | 0.207411 | 0.486895 | 0.469237 | Wars     |
| GO_MF_m:GO:000491 interleukin  | 1/2529 | 2/23049 | 0.207411 | 0.486895 | 0.469237 | Il2rb    |
| GO_MF_m:GO:000494 calcitonin r | 1/2529 | 2/23049 | 0.207411 | 0.486895 | 0.469237 | Calcr    |
| GO_MF_m:GO:000499 thyrotropir  | 1/2529 | 2/23049 | 0.207411 | 0.486895 | 0.469237 | Trhr     |
| GO_MF_m:GO:000501 platelet-de  | 1/2529 | 2/23049 | 0.207411 | 0.486895 | 0.469237 | Pdgfra   |
| GO_MF_m:GO:000503 osmosensc    | 1/2529 | 2/23049 | 0.207411 | 0.486895 | 0.469237 | Trpv4    |
| GO_MF_m:GO:000505 peroxisom    | 1/2529 | 2/23049 | 0.207411 | 0.486895 | 0.469237 | Pex5     |
| GO_MF_m:GO:000509 Rab GDP-c    | 1/2529 | 2/23049 | 0.207411 | 0.486895 | 0.469237 | Gdi2     |
| GO_MF_m:GO:000513 granulocyt   | 1/2529 | 2/23049 | 0.207411 | 0.486895 | 0.469237 | Csf3     |
| GO_MF_m:GO:000513 interferon-  | 1/2529 | 2/23049 | 0.207411 | 0.486895 | 0.469237 | Ilfng    |
| GO_MF_m:GO:000513 interleukin  | 1/2529 | 2/23049 | 0.207411 | 0.486895 | 0.469237 | Il7      |
| GO_MF_m:GO:000515 interleukin  | 1/2529 | 2/23049 | 0.207411 | 0.486895 | 0.469237 | Il1rn    |
| GO_MF_m:GO:000515 interleukin  | 1/2529 | 2/23049 | 0.207411 | 0.486895 | 0.469237 | Il1rn    |
| GO_MF_m:GO:000517 hepatocyte   | 1/2529 | 2/23049 | 0.207411 | 0.486895 | 0.469237 | Glmn     |
| GO_MF_m:GO:000545 GDP-fucos    | 1/2529 | 2/23049 | 0.207411 | 0.486895 | 0.469237 | Slc35c1  |
| GO_MF_m:GO:000804 calcium ser  | 1/2529 | 2/23049 | 0.207411 | 0.486895 | 0.469237 | Guca1a   |
| GO_MF_m:GO:000810 N-acetylla   | 1/2529 | 2/23049 | 0.207411 | 0.486895 | 0.469237 | Gcnt2    |
| GO_MF_m:GO:000811 peptide-m    | 1/2529 | 2/23049 | 0.207411 | 0.486895 | 0.469237 | Txn2     |
| GO_MF_m:GO:000811 N-acetylla   | 1/2529 | 2/23049 | 0.207411 | 0.486895 | 0.469237 | St3gal3  |
| GO_MF_m:GO:000825 tRNA-spec    | 1/2529 | 2/23049 | 0.207411 | 0.486895 | 0.469237 | Adat1    |
| GO_MF_m:GO:0008418-oxo-7,8-    | 1/2529 | 2/23049 | 0.207411 | 0.486895 | 0.469237 | Nudt1    |
| GO_MF_m:GO:0008443'(2'),5'-bis | 1/2529 | 2/23049 | 0.207411 | 0.486895 | 0.469237 | Bpnt1    |
| GO_MF_m:GO:000851 secondary    | 1/2529 | 2/23049 | 0.207411 | 0.486895 | 0.469237 | Slc22a1  |
| GO_MF_m:GO:000865 rRNA (uridi  | 1/2529 | 2/23049 | 0.207411 | 0.486895 | 0.469237 | Ftsj3    |
| GO_MF_m:GO:000867 2,4-dienoy   | 1/2529 | 2/23049 | 0.207411 | 0.486895 | 0.469237 | Decr2    |
| GO_MF_m:GO:000896 phosphatic   | 1/2529 | 2/23049 | 0.207411 | 0.486895 | 0.469237 | Ptpmt1   |
| GO_MF_m:GO:000896 phosphogl    | 1/2529 | 2/23049 | 0.207411 | 0.486895 | 0.469237 | Aptx     |
| GO_MF_m:GO:000938 rRNA (cyto   | 1/2529 | 2/23049 | 0.207411 | 0.486895 | 0.469237 | Nop2     |
| GO_MF_m:GO:001069 acetyltrans  | 1/2529 | 2/23049 | 0.207411 | 0.486895 | 0.469237 | Bcas3    |
| GO_MF_m:GO:001518 L-asparagi   | 1/2529 | 2/23049 | 0.207411 | 0.486895 | 0.469237 | Slc38a7  |
| GO_MF_m:GO:001521 pyrimidine   | 1/2529 | 2/23049 | 0.207411 | 0.486895 | 0.469237 | Slc25a33 |
| GO_MF_m:GO:001522 acyl carniti | 1/2529 | 2/23049 | 0.207411 | 0.486895 | 0.469237 | Slc25a20 |
| GO_MF_m:GO:001535 methotrex    | 1/2529 | 2/23049 | 0.207411 | 0.486895 | 0.469237 | Slc46a1  |
| GO_MF_m:GO:001592 trehalase a  | 1/2529 | 2/23049 | 0.207411 | 0.486895 | 0.469237 | Pgghg    |
| GO_MF_m:GO:001616 linoleate 1  | 1/2529 | 2/23049 | 0.207411 | 0.486895 | 0.469237 | Alox12   |
| GO_MF_m:GO:001623 sphingomy    | 1/2529 | 2/23049 | 0.207411 | 0.486895 | 0.469237 | Stx4a    |
| GO_MF_m:GO:001629 myristoyl-   | 1/2529 | 2/23049 | 0.207411 | 0.486895 | 0.469237 | Fasn     |

|                                       |         |          |          |          |           |
|---------------------------------------|---------|----------|----------|----------|-----------|
| GO_MF_m:GO:001629 palmitoyl-[1/2529   | 2/23049 | 0.207411 | 0.486895 | 0.469237 | Fasn      |
| GO_MF_m:GO:001629 acyl-[acyl-1/2529   | 2/23049 | 0.207411 | 0.486895 | 0.469237 | Fasn      |
| GO_MF_m:GO:001641S-acetyltra 1/2529   | 2/23049 | 0.207411 | 0.486895 | 0.469237 | Fasn      |
| GO_MF_m:GO:001641S-malonylt 1/2529    | 2/23049 | 0.207411 | 0.486895 | 0.469237 | Fasn      |
| GO_MF_m:GO:001642 malonyltra 1/2529   | 2/23049 | 0.207411 | 0.486895 | 0.469237 | Fasn      |
| GO_MF_m:GO:001649 G-protein 1/2529    | 2/23049 | 0.207411 | 0.486895 | 0.469237 | Ntsr2     |
| GO_MF_m:GO:001671 oxidoreduc 1/2529   | 2/23049 | 0.207411 | 0.486895 | 0.469237 | Tyr       |
| GO_MF_m:GO:001678 phosphotr 1/2529    | 2/23049 | 0.207411 | 0.486895 | 0.469237 | Sephs1    |
| GO_MF_m:GO:001686 intramolec 1/2529   | 2/23049 | 0.207411 | 0.486895 | 0.469237 | Ddt       |
| GO_MF_m:GO:001690 oxidoreduc 1/2529   | 2/23049 | 0.207411 | 0.486895 | 0.469237 | Vkorc111  |
| GO_MF_m:GO:001977 Atg12 tran 1/2529   | 2/23049 | 0.207411 | 0.486895 | 0.469237 | Atg10     |
| GO_MF_m:GO:001991 cyclin-dep 1/2529   | 2/23049 | 0.207411 | 0.486895 | 0.469237 | Cdkn1a    |
| GO_MF_m:GO:001997 interleukin 1/2529  | 2/23049 | 0.207411 | 0.486895 | 0.469237 | Il12b     |
| GO_MF_m:GO:002302 MHC class 1/2529    | 2/23049 | 0.207411 | 0.486895 | 0.469237 | Fam49b    |
| GO_MF_m:GO:002303 MHC class 1/2529    | 2/23049 | 0.207411 | 0.486895 | 0.469237 | Fam49b    |
| GO_MF_m:GO:003011 glial cell-d 1/2529 | 2/23049 | 0.207411 | 0.486895 | 0.469237 | Gdnf      |
| GO_MF_m:GO:003029 receptor sig 1/2529 | 2/23049 | 0.207411 | 0.486895 | 0.469237 | Hyal2     |
| GO_MF_m:GO:003036 molybdopt 1/2529    | 2/23049 | 0.207411 | 0.486895 | 0.469237 | Mocs2     |
| GO_MF_m:GO:003172 hemoglobi 1/2529    | 2/23049 | 0.207411 | 0.486895 | 0.469237 | Hbb-bs    |
| GO_MF_m:GO:003179 type 1 met 1/2529   | 2/23049 | 0.207411 | 0.486895 | 0.469237 | Dnm3      |
| GO_MF_m:GO:003183 neurokinin 1/2529   | 2/23049 | 0.207411 | 0.486895 | 0.469237 | Tac1      |
| GO_MF_m:GO:003183 substance 1/2529    | 2/23049 | 0.207411 | 0.486895 | 0.469237 | Tac1      |
| GO_MF_m:GO:003186 prostanoid 1/2529   | 2/23049 | 0.207411 | 0.486895 | 0.469237 | Fem1a     |
| GO_MF_m:GO:003189 V1A vasop 1/2529    | 2/23049 | 0.207411 | 0.486895 | 0.469237 | Avpr1a    |
| GO_MF_m:GO:003209 Pycin dom 1/2529    | 2/23049 | 0.207411 | 0.486895 | 0.469237 | Pycard    |
| GO_MF_m:GO:003218 dinucleotid 1/2529  | 2/23049 | 0.207411 | 0.486895 | 0.469237 | Msh3      |
| GO_MF_m:GO:003314 FFAT motif 1/2529   | 2/23049 | 0.207411 | 0.486895 | 0.469237 | Vapb      |
| GO_MF_m:GO:003441 bisphosph 1/2529    | 2/23049 | 0.207411 | 0.486895 | 0.469237 | Tigar     |
| GO_MF_m:GO:003443 glycoprote 1/2529   | 2/23049 | 0.207411 | 0.486895 | 0.469237 | Vldlr     |
| GO_MF_m:GO:003503 histone ac 1/2529   | 2/23049 | 0.207411 | 0.486895 | 0.469237 | Pygo2     |
| GO_MF_m:GO:003540 histone kin 1/2529  | 2/23049 | 0.207411 | 0.486895 | 0.469237 | Pkn1      |
| GO_MF_m:GO:003540 histone kin 1/2529  | 2/23049 | 0.207411 | 0.486895 | 0.469237 | Prkca     |
| GO_MF_m:GO:003571 chemokine 1/2529    | 2/23049 | 0.207411 | 0.486895 | 0.469237 | Ccr1      |
| GO_MF_m:GO:003608 purine nucl 1/2529  | 2/23049 | 0.207411 | 0.486895 | 0.469237 | Slc35c1   |
| GO_MF_m:GO:003646 BLOC-2 co 1/2529    | 2/23049 | 0.207411 | 0.486895 | 0.469237 | Rab32     |
| GO_MF_m:GO:003802 reelin rece 1/2529  | 2/23049 | 0.207411 | 0.486895 | 0.469237 | Vldlr     |
| GO_MF_m:GO:003813 neuregulin 1/2529   | 2/23049 | 0.207411 | 0.486895 | 0.469237 | Erbp3     |
| GO_MF_m:GO:004228 dolichyl py 1/2529  | 2/23049 | 0.207411 | 0.486895 | 0.469237 | Alg6      |
| GO_MF_m:GO:004278 3'-tRNA pr 1/2529   | 2/23049 | 0.207411 | 0.486895 | 0.469237 | Elac1     |
| GO_MF_m:GO:004368 copper-tra 1/2529   | 2/23049 | 0.207411 | 0.486895 | 0.469237 | Atp7b     |
| GO_MF_m:GO:004462 ACP phosp 1/2529    | 2/23049 | 0.207411 | 0.486895 | 0.469237 | Zfp593    |
| GO_MF_m:GO:004503 UTP-activa 1/2529   | 2/23049 | 0.207411 | 0.486895 | 0.469237 | P2ry2     |
| GO_MF_m:GO:004551 interleukin 1/2529  | 2/23049 | 0.207411 | 0.486895 | 0.469237 | Il12b     |
| GO_MF_m:GO:004556 TRAIL bind 1/2529   | 2/23049 | 0.207411 | 0.486895 | 0.469237 | Tnfrsf10b |
| GO_MF_m:GO:004640 polynucleo 1/2529   | 2/23049 | 0.207411 | 0.486895 | 0.469237 | Aptx      |
| GO_MF_m:GO:004702 3-oxoacyl- 1/2529   | 2/23049 | 0.207411 | 0.486895 | 0.469237 | Cbr4      |
| GO_MF_m:GO:004705 vitamin-K- 1/2529   | 2/23049 | 0.207411 | 0.486895 | 0.469237 | Vkorc111  |
| GO_MF_m:GO:004722 beta-1,3-g 1/2529   | 2/23049 | 0.207411 | 0.486895 | 0.469237 | B3gnt3    |

|                                         |           |          |          |          |             |
|-----------------------------------------|-----------|----------|----------|----------|-------------|
| GO_MF_mf:GO:00474C alkenylglyc 1/2529   | 2/23049   | 0.207411 | 0.486895 | 0.469237 | Tmem86b     |
| GO_MF_mf:GO:00474C alkenylglyc 1/2529   | 2/23049   | 0.207411 | 0.486895 | 0.469237 | Tmem86b     |
| GO_MF_mf:GO:00476E alanine-ox 1/2529    | 2/23049   | 0.207411 | 0.486895 | 0.469237 | Gpt         |
| GO_MF_mf:GO:00478C cytidylate c 1/2529  | 2/23049   | 0.207411 | 0.486895 | 0.469237 | Gucy1b1     |
| GO_MF_mf:GO:005017 phenylpyru 1/2529    | 2/23049   | 0.207411 | 0.486895 | 0.469237 | Ddt         |
| GO_MF_mf:GO:00502E rhodopsin 1/2529     | 2/23049   | 0.207411 | 0.486895 | 0.469237 | Grk4        |
| GO_MF_mf:GO:00502E ribosylnico 1/2529   | 2/23049   | 0.207411 | 0.486895 | 0.469237 | Nmrk2       |
| GO_MF_mf:GO:00511E prosthetic 1/2529    | 2/23049   | 0.207411 | 0.486895 | 0.469237 | Zfp593      |
| GO_MF_mf:GO:00514E corticotrop 1/2529   | 2/23049   | 0.207411 | 0.486895 | 0.469237 | Crhbp       |
| GO_MF_mf:GO:00525E tryptamine 1/2529    | 2/23049   | 0.207411 | 0.486895 | 0.469237 | Aoc3        |
| GO_MF_mf:GO:00525E aminoacet 1/2529     | 2/23049   | 0.207411 | 0.486895 | 0.469237 | Aoc3        |
| GO_MF_mf:GO:00525E aliphatic-al 1/2529  | 2/23049   | 0.207411 | 0.486895 | 0.469237 | Aoc3        |
| GO_MF_mf:GO:00525E phenethyla 1/2529    | 2/23049   | 0.207411 | 0.486895 | 0.469237 | Aoc3        |
| GO_MF_mf:GO:00526E L-leucine tr 1/2529  | 2/23049   | 0.207411 | 0.486895 | 0.469237 | Bcat2       |
| GO_MF_mf:GO:00526E L-valine tr 1/2529   | 2/23049   | 0.207411 | 0.486895 | 0.469237 | Bcat2       |
| GO_MF_mf:GO:00526E L-isoleucin 1/2529   | 2/23049   | 0.207411 | 0.486895 | 0.469237 | Bcat2       |
| GO_MF_mf:GO:005287 tocopherol 1/2529    | 2/23049   | 0.207411 | 0.486895 | 0.469237 | Cyp4f14     |
| GO_MF_mf:GO:005287 alpha-toco 1/2529    | 2/23049   | 0.207411 | 0.486895 | 0.469237 | Cyp4f14     |
| GO_MF_mf:GO:00600C plus-end d 1/2529    | 2/23049   | 0.207411 | 0.486895 | 0.469237 | Myo3a       |
| GO_MF_mf:GO:006171 N(6)-L-thr 1/2529    | 2/23049   | 0.207411 | 0.486895 | 0.469237 | Osgpl1      |
| GO_MF_mf:GO:006171 folic acid r 1/2529  | 2/23049   | 0.207411 | 0.486895 | 0.469237 | Folr2       |
| GO_MF_mf:GO:006174 forked DN 1/2529     | 2/23049   | 0.207411 | 0.486895 | 0.469237 | Blm         |
| GO_MF_mf:GO:00617E ribosylnico 1/2529   | 2/23049   | 0.207411 | 0.486895 | 0.469237 | Nmrk2       |
| GO_MF_mf:GO:00701E methionine 1/2529    | 2/23049   | 0.207411 | 0.486895 | 0.469237 | Msrp1       |
| GO_MF_mf:GO:00702E tyrosyl-DN 1/2529    | 2/23049   | 0.207411 | 0.486895 | 0.469237 | Tdp2        |
| GO_MF_mf:GO:00705C high-densi 1/2529    | 2/23049   | 0.207411 | 0.486895 | 0.469237 | Scarb1      |
| GO_MF_mf:GO:007057 vitamin D 2 1/2529   | 2/23049   | 0.207411 | 0.486895 | 0.469237 | Cyp24a1     |
| GO_MF_mf:GO:00712C histone pre 1/2529   | 2/23049   | 0.207411 | 0.486895 | 0.469237 | Eri1        |
| GO_MF_mf:GO:00715E UFM1 hydr 1/2529     | 2/23049   | 0.207411 | 0.486895 | 0.469237 | Ufsp1       |
| GO_MF_mf:GO:00717E chemokine 1/2529     | 2/23049   | 0.207411 | 0.486895 | 0.469237 | Ccr1        |
| GO_MF_mf:GO:00717E K6-linked 1/2529     | 2/23049   | 0.207411 | 0.486895 | 0.469237 | Mindy2      |
| GO_MF_mf:GO:00725E N-acetyl-L 1/2529    | 2/23049   | 0.207411 | 0.486895 | 0.469237 | Rimklb      |
| GO_MF_mf:GO:00905E phosphatic 1/2529    | 2/23049   | 0.207411 | 0.486895 | 0.469237 | Abcb1a      |
| GO_MF_mf:GO:00970C adipokineti 1/2529   | 2/23049   | 0.207411 | 0.486895 | 0.469237 | Adipor2     |
| GO_MF_mf:GO:009864 integrin bir 1/2529  | 2/23049   | 0.207411 | 0.486895 | 0.469237 | Madcam1     |
| GO_MF_mf:GO:19050E voltage-ga 1/2529    | 2/23049   | 0.207411 | 0.486895 | 0.469237 | Kcnd2       |
| GO_MF_mf:GO:19901E euchromat 1/2529     | 2/23049   | 0.207411 | 0.486895 | 0.469237 | Ash2l       |
| GO_MF_mf:GO:00153E primary ac 17/2529   | 125/23049 | 0.208092 | 0.487964 | 0.470266 | Abca12/Ab   |
| GO_MF_mf:GO:00426E ATPase act 16/2529   | 117/23049 | 0.210534 | 0.4921   | 0.474253 | Abca12/Ab   |
| GO_MF_mf:GO:000377 actin bindir 50/2529 | 406/23049 | 0.211552 | 0.4921   | 0.474253 | Abra/Abra   |
| GO_MF_mf:GO:00016E G-protein 36/2529    | 286/23049 | 0.213674 | 0.4921   | 0.474253 | Adm/Ador    |
| GO_MF_mf:GO:00170E sodium cha 6/2529    | 37/23049  | 0.215035 | 0.4921   | 0.474253 | Atp2b4/Ca   |
| GO_MF_mf:GO:001984 isoprenoid 6/2529    | 37/23049  | 0.215035 | 0.4921   | 0.474253 | Akr1b10/C   |
| GO_MF_mf:GO:00039E NADPH-he 2/2529      | 8/23049   | 0.216242 | 0.4921   | 0.474253 | Mtrr/Por    |
| GO_MF_mf:GO:00040E aldehyde d 2/2529    | 8/23049   | 0.216242 | 0.4921   | 0.474253 | Aldh1a3/Al  |
| GO_MF_mf:GO:00043C enoyl-CoA 2/2529     | 8/23049   | 0.216242 | 0.4921   | 0.474253 | Echs1/Ehha  |
| GO_MF_mf:GO:00047E sphingomy 2/2529     | 8/23049   | 0.216242 | 0.4921   | 0.474253 | Smpd2/Sm    |
| GO_MF_mf:GO:00053E nucleoside 2/2529    | 8/23049   | 0.216242 | 0.4921   | 0.474253 | Slc29a3/Slc |

|                                |         |           |          |          |          |             |
|--------------------------------|---------|-----------|----------|----------|----------|-------------|
| GO_MF_mf:GO:000803high-densi   | 2/2529  | 8/23049   | 0.216242 | 0.4921   | 0.474253 | Cd36/Scar   |
| GO_MF_mf:GO:000842phosphatic   | 2/2529  | 8/23049   | 0.216242 | 0.4921   | 0.474253 | Nf1/Pltp    |
| GO_MF_mf:GO:001999diacylglyce  | 2/2529  | 8/23049   | 0.216242 | 0.4921   | 0.474253 | Dgat1/Pltp  |
| GO_MF_mf:GO:003034protein ph   | 2/2529  | 8/23049   | 0.216242 | 0.4921   | 0.474253 | Atp2b4/Slc  |
| GO_MF_mf:GO:003199insulin-like | 2/2529  | 8/23049   | 0.216242 | 0.4921   | 0.474253 | Igf2r/Igfbp |
| GO_MF_mf:GO:003240mismatch r   | 2/2529  | 8/23049   | 0.216242 | 0.4921   | 0.474253 | Atr/Pcna    |
| GO_MF_mf:GO:003404poly(G) bin  | 2/2529  | 8/23049   | 0.216242 | 0.4921   | 0.474253 | Fmr1/Pnpt   |
| GO_MF_mf:GO:003459phosphatic   | 2/2529  | 8/23049   | 0.216242 | 0.4921   | 0.474253 | Ptpmt1/Sy   |
| GO_MF_mf:GO:003459phosphatic   | 2/2529  | 8/23049   | 0.216242 | 0.4921   | 0.474253 | Synj1/Tme   |
| GO_MF_mf:GO:004554syndecan t   | 2/2529  | 8/23049   | 0.216242 | 0.4921   | 0.474253 | Gpnmb/Nf    |
| GO_MF_mf:GO:005102GDP-disso    | 2/2529  | 8/23049   | 0.216242 | 0.4921   | 0.474253 | Plxn3/Rak   |
| GO_MF_mf:GO:009702ubiquitin-ç  | 2/2529  | 8/23049   | 0.216242 | 0.4921   | 0.474253 | Cdc20/Rinç  |
| GO_MF_mf:GO:199022histone me   | 2/2529  | 8/23049   | 0.216242 | 0.4921   | 0.474253 | Nop56/Prd   |
| GO_MF_mf:GO:000554hyaluronic   | 4/2529  | 22/23049  | 0.216478 | 0.4921   | 0.474253 | 2300002M:   |
| GO_MF_mf:GO:001560organophc    | 4/2529  | 22/23049  | 0.216478 | 0.4921   | 0.474253 | Atp8b1/Slc  |
| GO_MF_mf:GO:001705structural c | 4/2529  | 22/23049  | 0.216478 | 0.4921   | 0.474253 | Nup153/Ni   |
| GO_MF_mf:GO:004549chemorepe    | 4/2529  | 22/23049  | 0.216478 | 0.4921   | 0.474253 | Epha7/Flrt  |
| GO_MF_mf:GO:004802mRNA 5'-L    | 4/2529  | 22/23049  | 0.216478 | 0.4921   | 0.474253 | Fmr1/Igf2b  |
| GO_MF_mf:GO:007053K63-linked   | 4/2529  | 22/23049  | 0.216478 | 0.4921   | 0.474253 | Mindy2/Nç   |
| GO_MF_mf:GO:000462phospholip   | 12/2529 | 85/23049  | 0.218975 | 0.497252 | 0.479217 | Abhd1/Adc   |
| GO_MF_mf:GO:002284voltage-ga   | 19/2529 | 143/23049 | 0.220849 | 0.499729 | 0.481605 | Cacnb2/Ca   |
| GO_MF_mf:GO:001676transferase  | 8/2529  | 53/23049  | 0.221241 | 0.499729 | 0.481605 | Aprt/Art1/  |
| GO_MF_mf:GO:001683carbon-ox    | 9/2529  | 61/23049  | 0.221829 | 0.499729 | 0.481605 | Dglucy/Api  |
| GO_MF_mf:GO:000379lysozyme a   | 3/2529  | 15/23049  | 0.222617 | 0.499729 | 0.481605 | 1700016DC   |
| GO_MF_mf:GO:000469protein kin  | 3/2529  | 15/23049  | 0.222617 | 0.499729 | 0.481605 | Pkn1/Prkca  |
| GO_MF_mf:GO:000516platelet-de  | 3/2529  | 15/23049  | 0.222617 | 0.499729 | 0.481605 | Pdgfa/Pdg   |
| GO_MF_mf:GO:001521nucleotide   | 3/2529  | 15/23049  | 0.222617 | 0.499729 | 0.481605 | Slc25a23/S  |
| GO_MF_mf:GO:001620AMP bindir   | 3/2529  | 15/23049  | 0.222617 | 0.499729 | 0.481605 | Aprt/Oxgr1  |
| GO_MF_mf:GO:001629palmitoyl-(  | 3/2529  | 15/23049  | 0.222617 | 0.499729 | 0.481605 | Acot1/Acoi  |
| GO_MF_mf:GO:003054acetylcholin | 3/2529  | 15/23049  | 0.222617 | 0.499729 | 0.481605 | Cdk5/Fnta/  |
| GO_MF_mf:GO:009960neurotrans   | 3/2529  | 15/23049  | 0.222617 | 0.499729 | 0.481605 | Cdk5/Fnta/  |
| GO_MF_mf:GO:003162ubiquitin p  | 40/2529 | 322/23049 | 0.224001 | 0.502313 | 0.484095 | Abtb1/Ank   |
| GO_MF_mf:GO:001681hydrolase ç  | 5/2529  | 30/23049  | 0.227853 | 0.509889 | 0.491396 | Adat1/Apo   |
| GO_MF_mf:GO:001923deaminase    | 5/2529  | 30/23049  | 0.227853 | 0.509889 | 0.491396 | Adat1/Apo   |
| GO_MF_mf:GO:014010catalytic ac | 16/2529 | 119/23049 | 0.230555 | 0.515401 | 0.496708 | 6430573F1   |
| GO_MF_mf:GO:004227peptide bir  | 38/2529 | 306/23049 | 0.231499 | 0.516975 | 0.498226 | Adcyap1r1.  |
| GO_MF_mf:GO:000548SNAP recej   | 6/2529  | 38/23049  | 0.233491 | 0.520344 | 0.501473 | Snap29/St   |
| GO_MF_mf:GO:190150carbohydrç   | 6/2529  | 38/23049  | 0.233491 | 0.520344 | 0.501473 | Slc25a23/S  |
| GO_MF_mf:GO:001712SH3 domai    | 17/2529 | 128/23049 | 0.237197 | 0.528057 | 0.508905 | Abi1/Bcar1  |
| GO_MF_mf:GO:002003heme bind    | 19/2529 | 145/23049 | 0.239324 | 0.532242 | 0.512938 | Cyb5a/Cyb   |
| GO_MF_mf:GO:000813nuclear loc  | 4/2529  | 23/23049  | 0.241014 | 0.534898 | 0.515499 | Brap/Lbr/N  |
| GO_MF_mf:GO:003361receptor se  | 4/2529  | 23/23049  | 0.241014 | 0.534898 | 0.515499 | Bmp3/Cfc1   |
| GO_MF_mf:GO:000852G-protein (  | 17/2529 | 129/23049 | 0.247257 | 0.542683 | 0.523001 | Avpr1a/Cal  |
| GO_MF_mf:GO:000550retinoid bir | 5/2529  | 31/23049  | 0.249092 | 0.542683 | 0.523001 | Akr1b10/C   |
| GO_MF_mf:GO:000820ion channe   | 5/2529  | 31/23049  | 0.249092 | 0.542683 | 0.523001 | Cav1/Cav3.  |
| GO_MF_mf:GO:004323laminin bin  | 5/2529  | 31/23049  | 0.249092 | 0.542683 | 0.523001 | 2300002M:   |
| GO_MF_mf:GO:000554phosphatic   | 6/2529  | 39/23049  | 0.252414 | 0.542683 | 0.523001 | Arhgap9/Fi  |
| GO_MF_mf:GO:001622steroid def  | 6/2529  | 39/23049  | 0.252414 | 0.542683 | 0.523001 | Akr1c12/H:  |



|                                 |           |           |          |          |          |              |
|---------------------------------|-----------|-----------|----------|----------|----------|--------------|
| GO_MF_mf:GO:004286amide tran    | 6/2529    | 39/23049  | 0.252414 | 0.542683 | 0.523001 | Folr2/Slc14  |
| GO_MF_mf:GO:004691transition n  | 6/2529    | 39/23049  | 0.252414 | 0.542683 | 0.523001 | Atp7b/Slc3   |
| GO_MF_mf:GO:190161organic hyc   | 7/2529    | 47/23049  | 0.253191 | 0.542683 | 0.523001 | Abcc3/Slc1   |
| GO_MF_mf:GO:000014microfilam    | 3/2529    | 16/23049  | 0.253237 | 0.542683 | 0.523001 | Myh14/My     |
| GO_MF_mf:GO:000105RNA polyr     | 3/2529    | 16/23049  | 0.253237 | 0.542683 | 0.523001 | Polr2f/Polr  |
| GO_MF_mf:GO:000184opsonin bin   | 3/2529    | 16/23049  | 0.253237 | 0.542683 | 0.523001 | Cd93/Ilgan   |
| GO_MF_mf:GO:000454tRNA-spec     | 3/2529    | 16/23049  | 0.253237 | 0.542683 | 0.523001 | Rpp40/Tse    |
| GO_MF_mf:GO:000512death recej   | 3/2529    | 16/23049  | 0.253237 | 0.542683 | 0.523001 | Casp8/Bex    |
| GO_MF_mf:GO:00083C voltage-ga   | 3/2529    | 16/23049  | 0.253237 | 0.542683 | 0.523001 | Ano1/Clcn    |
| GO_MF_mf:GO:00310C filamin bin  | 3/2529    | 16/23049  | 0.253237 | 0.542683 | 0.523001 | Dpysl4/Rflr  |
| GO_MF_mf:GO:00422E MHC class    | 3/2529    | 16/23049  | 0.253237 | 0.542683 | 0.523001 | Atp5a1/Bca   |
| GO_MF_mf:GO:00428C histone me   | 3/2529    | 16/23049  | 0.253237 | 0.542683 | 0.523001 | Ash2l/Rbbp   |
| GO_MF_mf:GO:19019E phosphatic   | 20/2529   | 155/23049 | 0.253896 | 0.542683 | 0.523001 | Ankfy1/An    |
| GO_MF_mf:GO:00168E ATPase act   | 54/2529   | 449/23049 | 0.255653 | 0.542683 | 0.523001 | Abca12/Ab    |
| GO_MF_mf:GO:000451endonucle     | 17/2529   | 130/23049 | 0.257483 | 0.542683 | 0.523001 | Aplf/Cpsf4   |
| GO_MF_mf:GO:000371transcripti   | 56/2529   | 467/23049 | 0.258428 | 0.542683 | 0.523001 | Ankra2/An    |
| GO_MF_mf:GO:00001E rDNA bind    | 2/2529    | 9/23049   | 0.258941 | 0.542683 | 0.523001 | H2afy/Maf    |
| GO_MF_mf:GO:000077adenyl-nuc    | 2/2529    | 9/23049   | 0.258941 | 0.542683 | 0.523001 | Grpel1/Hsq   |
| GO_MF_mf:GO:000105RNA polyr     | 2/2529    | 9/23049   | 0.258941 | 0.542683 | 0.523001 | Polr2f/Polr  |
| GO_MF_mf:GO:00038E 3-beta-hyc   | 2/2529    | 9/23049   | 0.258941 | 0.542683 | 0.523001 | Hsd3b3/Hs    |
| GO_MF_mf:GO:00038E 3-hydroxy    | 2/2529    | 9/23049   | 0.258941 | 0.542683 | 0.523001 | Ehhadh/Hs    |
| GO_MF_mf:GO:00039E acid phosp   | 2/2529    | 9/23049   | 0.258941 | 0.542683 | 0.523001 | Acp6/Acpp    |
| GO_MF_mf:GO:000441hyaluronor    | 2/2529    | 9/23049   | 0.258941 | 0.542683 | 0.523001 | Hyal2/Hyal   |
| GO_MF_mf:GO:000534ATP transr    | 2/2529    | 9/23049   | 0.258941 | 0.542683 | 0.523001 | Slc25a23/S   |
| GO_MF_mf:GO:00083E mechanosc    | 2/2529    | 9/23049   | 0.258941 | 0.542683 | 0.523001 | Tmem150c     |
| GO_MF_mf:GO:00084E selenium b   | 2/2529    | 9/23049   | 0.258941 | 0.542683 | 0.523001 | Rph3a/Sele   |
| GO_MF_mf:GO:00085E phosphatic   | 2/2529    | 9/23049   | 0.258941 | 0.542683 | 0.523001 | Abcb1a/Plt   |
| GO_MF_mf:GO:00085E N-acetyl     | lac2/2529 | 9/23049   | 0.258941 | 0.542683 | 0.523001 | B3gnt3/B3    |
| GO_MF_mf:GO:00164E tRNA (cyto   | 2/2529    | 9/23049   | 0.258941 | 0.542683 | 0.523001 | Mettl6/Nsu   |
| GO_MF_mf:GO:00167E oxidoreduc   | 2/2529    | 9/23049   | 0.258941 | 0.542683 | 0.523001 | Mmachc/N     |
| GO_MF_mf:GO:00168C ether hydr   | 2/2529    | 9/23049   | 0.258941 | 0.542683 | 0.523001 | Ephx2/Tme    |
| GO_MF_mf:GO:00171E aryl hydroc  | 2/2529    | 9/23049   | 0.258941 | 0.542683 | 0.523001 | Arntl/Tbp    |
| GO_MF_mf:GO:00230E MHC prote    | 2/2529    | 9/23049   | 0.258941 | 0.542683 | 0.523001 | Fam49b/H     |
| GO_MF_mf:GO:00302E structural   | c2/2529   | 9/23049   | 0.258941 | 0.542683 | 0.523001 | Krt36/Sprr1  |
| GO_MF_mf:GO:003154peptidyl-pi   | 2/2529    | 9/23049   | 0.258941 | 0.542683 | 0.523001 | Egln3/P4ha   |
| GO_MF_mf:GO:00352E UDP-gluco    | 2/2529    | 9/23049   | 0.258941 | 0.542683 | 0.523001 | Gys1/Uggt    |
| GO_MF_mf:GO:005054arachidonit   | 2/2529    | 9/23049   | 0.258941 | 0.542683 | 0.523001 | Cyp4f14/Sr   |
| GO_MF_mf:GO:00380E cargo recej  | 11/2529   | 80/23049  | 0.259187 | 0.542683 | 0.523001 | Cd36/Corir   |
| GO_MF_mf:GO:00443E ubiquitin-li | 41/2529   | 337/23049 | 0.263601 | 0.542683 | 0.523001 | Abtb1/Ank    |
| GO_MF_mf:GO:000021DNA secor     | 4/2529    | 24/23049  | 0.266137 | 0.542683 | 0.523001 | Blm/Ercc5/   |
| GO_MF_mf:GO:00016E G-protein    | 4/2529    | 24/23049  | 0.266137 | 0.542683 | 0.523001 | Ccr1/Ccrl2/  |
| GO_MF_mf:GO:00049E chemokine    | 4/2529    | 24/23049  | 0.266137 | 0.542683 | 0.523001 | Ccr1/Ccrl2/  |
| GO_MF_mf:GO:003054receptor in   | 4/2529    | 24/23049  | 0.266137 | 0.542683 | 0.523001 | Il18bp/Il1rr |
| GO_MF_mf:GO:00517E misfolded    | 4/2529    | 24/23049  | 0.266137 | 0.542683 | 0.523001 | Hspa1a/Hs    |
| GO_MF_mf:GO:007041R-SMAD b      | 4/2529    | 24/23049  | 0.266137 | 0.542683 | 0.523001 | Ankrd1/Me    |
| GO_MF_mf:GO:00423E histone bin  | 23/2529   | 182/23049 | 0.267011 | 0.542683 | 0.523001 | Bcas3/Ctsl/  |
| GO_MF_mf:GO:001627lysine N-m    | 8/2529    | 56/23049  | 0.268597 | 0.542683 | 0.523001 | Ash2l/Eef2l  |
| GO_MF_mf:GO:001627protein-lys   | 8/2529    | 56/23049  | 0.268597 | 0.542683 | 0.523001 | Ash2l/Eef2l  |

|                                                           |           |          |          |          |             |
|-----------------------------------------------------------|-----------|----------|----------|----------|-------------|
| GO_MF_mf:GO:003159 polyubiquitin 7/2529                   | 48/23049  | 0.270722 | 0.542683 | 0.523001 | Babam2/M    |
| GO_MF_mf:GO:005105 NF-kappaB 5/2529                       | 32/23049  | 0.270804 | 0.542683 | 0.523001 | Hdac1/Hda   |
| GO_MF_mf:GO:199078 protein tyrosine kinase 11/2529        | 81/23049  | 0.272586 | 0.542683 | 0.523001 | Dock4/Elm   |
| GO_MF_mf:GO:004432 ion channel 17/2529                    | 132/23049 | 0.278397 | 0.542683 | 0.523001 | Akap6/Cav   |
| GO_MF_mf:GO:000370 transcription factor 14/2529           | 107/23049 | 0.283163 | 0.542683 | 0.523001 | Arx/Esrrb/F |
| GO_MF_mf:GO:000508 Ras guanyl nucleotide 16/2529          | 124/23049 | 0.283775 | 0.542683 | 0.523001 | Arhgef18/F  |
| GO_MF_mf:GO:000832 methyl-CpG 3/2529                      | 17/23049  | 0.284393 | 0.542683 | 0.523001 | Mbd1/Prm    |
| GO_MF_mf:GO:000835 RNA polymerase 3/2529                  | 17/23049  | 0.284393 | 0.542683 | 0.523001 | Cdk1/Cdk7   |
| GO_MF_mf:GO:001527 outward rectifier 3/2529               | 17/23049  | 0.284393 | 0.542683 | 0.523001 | Kcna2/Kcnc  |
| GO_MF_mf:GO:001664 oxidoreductase 3/2529                  | 17/23049  | 0.284393 | 0.542683 | 0.523001 | Aldh4a1/M   |
| GO_MF_mf:GO:003561 RNA stem-loop 3/2529                   | 17/23049  | 0.284393 | 0.542683 | 0.523001 | Cpeb3/Fmr   |
| GO_MF_mf:GO:007030 phosphate 3/2529                       | 17/23049  | 0.284393 | 0.542683 | 0.523001 | Gsdmd/Pltj  |
| GO_MF_mf:GO:000014 SNARE binding 17/2529                  | 133/23049 | 0.289067 | 0.542683 | 0.523001 | Cav1/Dapk   |
| GO_MF_mf:GO:000504 signal sequence 6/2529                 | 41/23049  | 0.291403 | 0.542683 | 0.523001 | Brap/Lbr/N  |
| GO_MF_mf:GO:000818 poly-pyrimidine 4/2529                 | 25/23049  | 0.291699 | 0.542683 | 0.523001 | Fmr1/Hnrn   |
| GO_MF_mf:GO:001628 CoA hydrolysis 4/2529                  | 25/23049  | 0.291699 | 0.542683 | 0.523001 | Acot1/Aco   |
| GO_MF_mf:GO:001667 oxidoreductase 4/2529                  | 25/23049  | 0.291699 | 0.542683 | 0.523001 | Cox15/Cox   |
| GO_MF_mf:GO:001684 phosphorus 4/2529                      | 25/23049  | 0.291699 | 0.542683 | 0.523001 | Adcy4/Guc   |
| GO_MF_mf:GO:001688 endoribonuclease 4/2529                | 25/23049  | 0.291699 | 0.542683 | 0.523001 | Elac1/Fen1  |
| GO_MF_mf:GO:000486 protein phosphatase 5/2529             | 33/23049  | 0.292896 | 0.542683 | 0.523001 | 2810408A1   |
| GO_MF_mf:GO:001624 channel inhibitor 5/2529               | 33/23049  | 0.292896 | 0.542683 | 0.523001 | Cav1/Cav3   |
| GO_MF_mf:GO:000112 RNA polymerase 1/2529                  | 3/23049   | 0.294383 | 0.542683 | 0.523001 | Tbp         |
| GO_MF_mf:GO:000113 RNA polymerase 1/2529                  | 3/23049   | 0.294383 | 0.542683 | 0.523001 | Tbp         |
| GO_MF_mf:GO:000122 RNA polymerase 1/2529                  | 3/23049   | 0.294383 | 0.542683 | 0.523001 | Hdac2       |
| GO_MF_mf:GO:000382 beta-1,3-galactosyl 1/2529             | 3/23049   | 0.294383 | 0.542683 | 0.523001 | Gcnt1       |
| GO_MF_mf:GO:000387 6-phosphogluconate 1/2529              | 3/23049   | 0.294383 | 0.542683 | 0.523001 | Pfkl        |
| GO_MF_mf:GO:000398 acetate-CoA 1/2529                     | 3/23049   | 0.294383 | 0.542683 | 0.523001 | Acss3       |
| GO_MF_mf:GO:000401 adenosylhomocysteine 1/2529            | 3/23049   | 0.294383 | 0.542683 | 0.523001 | Ahcyl2      |
| GO_MF_mf:GO:000402 alcohol dehydrogenase 1/2529           | 3/23049   | 0.294383 | 0.542683 | 0.523001 | Adh1        |
| GO_MF_mf:GO:000406 L-aspartate 1/2529                     | 3/23049   | 0.294383 | 0.542683 | 0.523001 | Got1        |
| GO_MF_mf:GO:000411 cGMP-stimulated 1/2529                 | 3/23049   | 0.294383 | 0.542683 | 0.523001 | Pde11a      |
| GO_MF_mf:GO:000414 diamine N-1/2529                       | 3/23049   | 0.294383 | 0.542683 | 0.523001 | Sat1        |
| GO_MF_mf:GO:000434 glucose-6-phosphate 1/2529             | 3/23049   | 0.294383 | 0.542683 | 0.523001 | G6pc2       |
| GO_MF_mf:GO:000435 glutaminase 1/2529                     | 3/23049   | 0.294383 | 0.542683 | 0.523001 | Gls         |
| GO_MF_mf:GO:000441 hydroxyacyl-CoA 1/2529                 | 3/23049   | 0.294383 | 0.542683 | 0.523001 | Haghl       |
| GO_MF_mf:GO:000447 malic enzyme 1/2529                    | 3/23049   | 0.294383 | 0.542683 | 0.523001 | Me3         |
| GO_MF_mf:GO:000447 malate dehydrogenase 1/2529            | 3/23049   | 0.294383 | 0.542683 | 0.523001 | Me3         |
| GO_MF_mf:GO:000447 malate dehydrogenase 1/2529            | 3/23049   | 0.294383 | 0.542683 | 0.523001 | Me3         |
| GO_MF_mf:GO:000453 5'-3' exonuclease 1/2529               | 3/23049   | 0.294383 | 0.542683 | 0.523001 | Xrn2        |
| GO_MF_mf:GO:000461 phosphoglycerate 1/2529                | 3/23049   | 0.294383 | 0.542683 | 0.523001 | Glyr1       |
| GO_MF_mf:GO:000466 Rab geranyltransferase 1/2529          | 3/23049   | 0.294383 | 0.542683 | 0.523001 | Fnta        |
| GO_MF_mf:GO:000466 prostaglandin synthase 1/2529          | 3/23049   | 0.294383 | 0.542683 | 0.523001 | Ptges       |
| GO_MF_mf:GO:000471 protein-L-isoaspartyl methylase 1/2529 | 3/23049   | 0.294383 | 0.542683 | 0.523001 | Pcmtd1      |
| GO_MF_mf:GO:000473 pyrroline-5-carboxylate 1/2529         | 3/23049   | 0.294383 | 0.542683 | 0.523001 | Pycr2       |
| GO_MF_mf:GO:000473 pyruvate dehydrogenase 1/2529          | 3/23049   | 0.294383 | 0.542683 | 0.523001 | Pdhb        |
| GO_MF_mf:GO:000479 threonine deaminase 1/2529             | 3/23049   | 0.294383 | 0.542683 | 0.523001 | Shmt1       |
| GO_MF_mf:GO:000480 thyroxine 5-deiodinase 1/2529          | 3/23049   | 0.294383 | 0.542683 | 0.523001 | Dio2        |
| GO_MF_mf:GO:000480 tRNA (guanine) 1/2529                  | 3/23049   | 0.294383 | 0.542683 | 0.523001 | Trmt1       |

|                                                 |         |          |          |          |           |
|-------------------------------------------------|---------|----------|----------|----------|-----------|
| GO_MF_m:GO:000483 valine-tRN <sub>1</sub> /2529 | 3/23049 | 0.294383 | 0.542683 | 0.523001 | Vars2     |
| GO_MF_m:GO:000493 alpha1-adr1/2529              | 3/23049 | 0.294383 | 0.542683 | 0.523001 | Adra1d    |
| GO_MF_m:GO:000496 endothelin 1/2529             | 3/23049 | 0.294383 | 0.542683 | 0.523001 | Ednrb     |
| GO_MF_m:GO:000499 tachykinin 1/2529             | 3/23049 | 0.294383 | 0.542683 | 0.523001 | Tacr2     |
| GO_MF_m:GO:000499 vasoactive 1/2529             | 3/23049 | 0.294383 | 0.542683 | 0.523001 | Adcyap1r1 |
| GO_MF_m:GO:000500 epidermal 1/2529              | 3/23049 | 0.294383 | 0.542683 | 0.523001 | Nrg2      |
| GO_MF_m:GO:000509 Rho GDP-c1/2529               | 3/23049 | 0.294383 | 0.542683 | 0.523001 | Arhgdib   |
| GO_MF_m:GO:000516 neurotroph 1/2529             | 3/23049 | 0.294383 | 0.542683 | 0.523001 | Ntf5      |
| GO_MF_m:GO:000517 stem cell fa1/2529            | 3/23049 | 0.294383 | 0.542683 | 0.523001 | Kitl      |
| GO_MF_m:GO:000527 acetylcholin1/2529            | 3/23049 | 0.294383 | 0.542683 | 0.523001 | Slc22a1   |
| GO_MF_m:GO:000529 L-histidine 1/2529            | 3/23049 | 0.294383 | 0.542683 | 0.523001 | Slc38a7   |
| GO_MF_m:GO:000533 norepinept1/2529              | 3/23049 | 0.294383 | 0.542683 | 0.523001 | Slc22a1   |
| GO_MF_m:GO:000547 carnitine:ac1/2529            | 3/23049 | 0.294383 | 0.542683 | 0.523001 | Slc25a20  |
| GO_MF_m:GO:000550 11-cis retir1/2529            | 3/23049 | 0.294383 | 0.542683 | 0.523001 | Opn4      |
| GO_MF_m:GO:000807 ornithine d1/2529             | 3/23049 | 0.294383 | 0.542683 | 0.523001 | Oaz1      |
| GO_MF_m:GO:000814 oxysterol b1/2529             | 3/23049 | 0.294383 | 0.542683 | 0.523001 | Gpr183    |
| GO_MF_m:GO:000814 structural c1/2529            | 3/23049 | 0.294383 | 0.542683 | 0.523001 | Bglap3    |
| GO_MF_m:GO:000815 hedgehog 1/2529               | 3/23049 | 0.294383 | 0.542683 | 0.523001 | B9d1      |
| GO_MF_m:GO:000824 tripeptidyl-1/2529            | 3/23049 | 0.294383 | 0.542683 | 0.523001 | Tpp2      |
| GO_MF_m:GO:000845 alpha-1,3- 1/2529             | 3/23049 | 0.294383 | 0.542683 | 0.523001 | Mgat4a    |
| GO_MF_m:GO:000851 sodium:pot1/2529              | 3/23049 | 0.294383 | 0.542683 | 0.523001 | Slc12a2   |
| GO_MF_m:GO:000873 L-allo-thre1/2529             | 3/23049 | 0.294383 | 0.542683 | 0.523001 | Shmt1     |
| GO_MF_m:GO:000879 aromatic-a1/2529              | 3/23049 | 0.294383 | 0.542683 | 0.523001 | Got1      |
| GO_MF_m:GO:000894 nitrate red1/2529             | 3/23049 | 0.294383 | 0.542683 | 0.523001 | Gphn      |
| GO_MF_m:GO:000967 potassium: 1/2529             | 3/23049 | 0.294383 | 0.542683 | 0.523001 | Slc12a2   |
| GO_MF_m:GO:001506 uridine nuc1/2529             | 3/23049 | 0.294383 | 0.542683 | 0.523001 | P2ry2     |
| GO_MF_m:GO:001511 iodide tran1/2529             | 3/23049 | 0.294383 | 0.542683 | 0.523001 | Ano1      |
| GO_MF_m:GO:001522 serotonin t1/2529             | 3/23049 | 0.294383 | 0.542683 | 0.523001 | Slc18a2   |
| GO_MF_m:GO:001524 aminophos1/2529               | 3/23049 | 0.294383 | 0.542683 | 0.523001 | Atp8b1    |
| GO_MF_m:GO:001525 proton cha1/2529              | 3/23049 | 0.294383 | 0.542683 | 0.523001 | Hvcn1     |
| GO_MF_m:GO:001527 stretch-act1/2529             | 3/23049 | 0.294383 | 0.542683 | 0.523001 | Trpv4     |
| GO_MF_m:GO:001531 sodium:ino1/2529              | 3/23049 | 0.294383 | 0.542683 | 0.523001 | Slc20a1   |
| GO_MF_m:GO:001537 sodium:chl1/2529              | 3/23049 | 0.294383 | 0.542683 | 0.523001 | Slc12a2   |
| GO_MF_m:GO:001601 morphoge1/2529                | 3/23049 | 0.294383 | 0.542683 | 0.523001 | Dand5     |
| GO_MF_m:GO:001643 rRNA (cyto1/2529              | 3/23049 | 0.294383 | 0.542683 | 0.523001 | Nop2      |
| GO_MF_m:GO:001643 rRNA (uridi1/2529             | 3/23049 | 0.294383 | 0.542683 | 0.523001 | Ftsj3     |
| GO_MF_m:GO:001650 long-chain1/2529              | 3/23049 | 0.294383 | 0.542683 | 0.523001 | Hsd17b4   |
| GO_MF_m:GO:001674 carboxyl- c1/2529             | 3/23049 | 0.294383 | 0.542683 | 0.523001 | Otc       |
| GO_MF_m:GO:001680 trialkylsulfc1/2529           | 3/23049 | 0.294383 | 0.542683 | 0.523001 | Ahcyl2    |
| GO_MF_m:GO:001682 hydrolase ε1/2529             | 3/23049 | 0.294383 | 0.542683 | 0.523001 | Fahd1     |
| GO_MF_m:GO:001682 hydrolase ε1/2529             | 3/23049 | 0.294383 | 0.542683 | 0.523001 | Fahd1     |
| GO_MF_m:GO:001694 natriuretic 1/2529            | 3/23049 | 0.294383 | 0.542683 | 0.523001 | Npr2      |
| GO_MF_m:GO:001709 heparan su1/2529              | 3/23049 | 0.294383 | 0.542683 | 0.523001 | Hs6st1    |
| GO_MF_m:GO:001709 very-long- 1/2529             | 3/23049 | 0.294383 | 0.542683 | 0.523001 | Acad11    |
| GO_MF_m:GO:001979 procollage1/2529              | 3/23049 | 0.294383 | 0.542683 | 0.523001 | P3h3      |
| GO_MF_m:GO:001980 spermidine1/2529              | 3/23049 | 0.294383 | 0.542683 | 0.523001 | Sat1      |
| GO_MF_m:GO:003002 extracellula1/2529            | 3/23049 | 0.294383 | 0.542683 | 0.523001 | Ambn      |
| GO_MF_m:GO:003014 alpha-1,6- 1/2529             | 3/23049 | 0.294383 | 0.542683 | 0.523001 | Ccdc126   |

|                   |                    |         |          |          |          |            |
|-------------------|--------------------|---------|----------|----------|----------|------------|
| GO_MF_m:GO:003015 | protein xylc1/2529 | 3/23049 | 0.294383 | 0.542683 | 0.523001 | Xylt1      |
| GO_MF_m:GO:003034 | structural c1/2529 | 3/23049 | 0.294383 | 0.542683 | 0.523001 | Ambn       |
| GO_MF_m:GO:003054 | acetylcholin1/2529 | 3/23049 | 0.294383 | 0.542683 | 0.523001 | Cdk5       |
| GO_MF_m:GO:003172 | CCR1 chem1/2529    | 3/23049 | 0.294383 | 0.542683 | 0.523001 | Ccl4       |
| GO_MF_m:GO:003185 | vasopressin1/2529  | 3/23049 | 0.294383 | 0.542683 | 0.523001 | Avpr1a     |
| GO_MF_m:GO:003214 | single guar1/2529  | 3/23049 | 0.294383 | 0.542683 | 0.523001 | Msh3       |
| GO_MF_m:GO:003374 | L-methionin1/2529  | 3/23049 | 0.294383 | 0.542683 | 0.523001 | Msrb1      |
| GO_MF_m:GO:003461 | tetrahydrol1/2529  | 3/23049 | 0.294383 | 0.542683 | 0.523001 | Th         |
| GO_MF_m:GO:003473 | histone de1/2529   | 3/23049 | 0.294383 | 0.542683 | 0.523001 | Hdac2      |
| GO_MF_m:GO:003553 | 8-oxo-7,8-1/2529   | 3/23049 | 0.294383 | 0.542683 | 0.523001 | Nudt1      |
| GO_MF_m:GO:003565 | AP-3 adap1/2529    | 3/23049 | 0.294383 | 0.542683 | 0.523001 | Rab32      |
| GO_MF_m:GO:003587 | death effec1/2529  | 3/23049 | 0.294383 | 0.542683 | 0.523001 | Casp8      |
| GO_MF_m:GO:004201 | interleukin-1/2529 | 3/23049 | 0.294383 | 0.542683 | 0.523001 | Il22ra1    |
| GO_MF_m:GO:004381 | phosphatic1/2529   | 3/23049 | 0.294383 | 0.542683 | 0.523001 | Synj1      |
| GO_MF_m:GO:004472 | hemi-meth1/2529    | 3/23049 | 0.294383 | 0.542683 | 0.523001 | Wt1        |
| GO_MF_m:GO:004515 | myosin II b1/2529  | 3/23049 | 0.294383 | 0.542683 | 0.523001 | Gsn        |
| GO_MF_m:GO:00464C | ATP-deper1/2529    | 3/23049 | 0.294383 | 0.542683 | 0.523001 | N4bp2      |
| GO_MF_m:GO:004704 | testosteron1/2529  | 3/23049 | 0.294383 | 0.542683 | 0.523001 | Hsd17b3    |
| GO_MF_m:GO:004713 | 1-alkylglyc1/2529  | 3/23049 | 0.294383 | 0.542683 | 0.523001 | Lpcat4     |
| GO_MF_m:GO:004723 | glucuronylc1/2529  | 3/23049 | 0.294383 | 0.542683 | 0.523001 | Csgalnact1 |
| GO_MF_m:GO:004775 | chondroitin1/2529  | 3/23049 | 0.294383 | 0.542683 | 0.523001 | Chst13     |
| GO_MF_m:GO:005025 | retinol O-f1/2529  | 3/23049 | 0.294383 | 0.542683 | 0.523001 | Dgat1      |
| GO_MF_m:GO:00503C | sugar-term1/2529   | 3/23049 | 0.294383 | 0.542683 | 0.523001 | G6pc2      |
| GO_MF_m:GO:005153 | 3 iron, 4 su1/2529 | 3/23049 | 0.294383 | 0.542683 | 0.523001 | Sdhb       |
| GO_MF_m:GO:005173 | polydeoxyr1/2529   | 3/23049 | 0.294383 | 0.542683 | 0.523001 | N4bp2      |
| GO_MF_m:GO:005173 | ATP-deper1/2529    | 3/23049 | 0.294383 | 0.542683 | 0.523001 | N4bp2      |
| GO_MF_m:GO:005187 | methotrexat1/2529  | 3/23049 | 0.294383 | 0.542683 | 0.523001 | Folr2      |
| GO_MF_m:GO:00529C | tRNA (guar1/2529   | 3/23049 | 0.294383 | 0.542683 | 0.523001 | Trmt10a    |
| GO_MF_m:GO:00551C | adiponectin1/2529  | 3/23049 | 0.294383 | 0.542683 | 0.523001 | Adipor2    |
| GO_MF_m:GO:007003 | rRNA (guar1/2529   | 3/23049 | 0.294383 | 0.542683 | 0.523001 | Mrm1       |
| GO_MF_m:GO:007013 | ubiquitin-li1/2529 | 3/23049 | 0.294383 | 0.542683 | 0.523001 | Senp1      |
| GO_MF_m:GO:007014 | SUMO-spe1/2529     | 3/23049 | 0.294383 | 0.542683 | 0.523001 | Senp1      |
| GO_MF_m:GO:00704C | NADP+ bir1/2529    | 3/23049 | 0.294383 | 0.542683 | 0.523001 | Akr1b10    |
| GO_MF_m:GO:007053 | oleic acid t1/2529 | 3/23049 | 0.294383 | 0.542683 | 0.523001 | Cd36       |
| GO_MF_m:GO:007054 | L-glutamin1/2529   | 3/23049 | 0.294383 | 0.542683 | 0.523001 | Gfpt2      |
| GO_MF_m:GO:007063 | type I activ1/2529 | 3/23049 | 0.294383 | 0.542683 | 0.523001 | Smad6      |
| GO_MF_m:GO:007074 | tubulin-glu1/2529  | 3/23049 | 0.294383 | 0.542683 | 0.523001 | Tpgs1      |
| GO_MF_m:GO:00709C | serine bind1/2529  | 3/23049 | 0.294383 | 0.542683 | 0.523001 | Shmt1      |
| GO_MF_m:GO:007093 | medium-cl1/2529    | 3/23049 | 0.294383 | 0.542683 | 0.523001 | Acad11     |
| GO_MF_m:GO:007155 | G-protein r1/2529  | 3/23049 | 0.294383 | 0.542683 | 0.523001 | P2ry2      |
| GO_MF_m:GO:008013 | L-phenylal1/2529   | 3/23049 | 0.294383 | 0.542683 | 0.523001 | Got1       |
| GO_MF_m:GO:008605 | voltage-ga1/2529   | 3/23049 | 0.294383 | 0.542683 | 0.523001 | Cacnb2     |
| GO_MF_m:GO:008607 | gap junctio1/2529  | 3/23049 | 0.294383 | 0.542683 | 0.523001 | Gjc1       |
| GO_MF_m:GO:00971C | supercoiled1/2529  | 3/23049 | 0.294383 | 0.542683 | 0.523001 | Psip1      |
| GO_MF_m:GO:190137 | acetate est1/2529  | 3/23049 | 0.294383 | 0.542683 | 0.523001 | Slc22a1    |
| GO_MF_m:GO:190577 | 8-hydroxy-1/2529   | 3/23049 | 0.294383 | 0.542683 | 0.523001 | Blm        |
| GO_MF_m:GO:199046 | leptin rece1/2529  | 3/23049 | 0.294383 | 0.542683 | 0.523001 | Snx2       |
| GO_MF_m:GO:199075 | protein bin1/2529  | 3/23049 | 0.294383 | 0.542683 | 0.523001 | Arrdc4     |

|                                       |           |          |          |          |             |
|---------------------------------------|-----------|----------|----------|----------|-------------|
| GO_MF_mf:GO:001679hydrolase ε17/2529  | 134/23049 | 0.299867 | 0.549606 | 0.529672 | 1700016DC   |
| GO_MF_mf:GO:001681hydrolase ε11/2529  | 83/23049  | 0.299999 | 0.549606 | 0.529672 | Acer3/Acy1  |
| GO_MF_mf:GO:000034RNA 7-me 2/2529     | 10/23049  | 0.301709 | 0.549606 | 0.529672 | Eif4e/Fmr1  |
| GO_MF_mf:GO:000184complemei2/2529     | 10/23049  | 0.301709 | 0.549606 | 0.529672 | Cd93/Mptx   |
| GO_MF_mf:GO:000817mRNA met2/2529      | 10/23049  | 0.301709 | 0.549606 | 0.529672 | Cmtr2/Rnr   |
| GO_MF_mf:GO:000834MAP kinasε2/2529    | 10/23049  | 0.301709 | 0.549606 | 0.529672 | Map4k2/M    |
| GO_MF_mf:GO:001521ADP transn2/2529    | 10/23049  | 0.301709 | 0.549606 | 0.529672 | Slc25a23/S  |
| GO_MF_mf:GO:001538potassium: 2/2529   | 10/23049  | 0.301709 | 0.549606 | 0.529672 | Slc9a1/Slc9 |
| GO_MF_mf:GO:003238oxidized D12/2529   | 10/23049  | 0.301709 | 0.549606 | 0.529672 | Blm/Xrcc1   |
| GO_MF_mf:GO:003501phosphatic2/2529    | 10/23049  | 0.301709 | 0.549606 | 0.529672 | Pik3r3/Pik3 |
| GO_MF_mf:GO:005054icosanoid t2/2529   | 10/23049  | 0.301709 | 0.549606 | 0.529672 | Cyp4f14/Sr  |
| GO_MF_mf:GO:005054icosatetrae 2/2529  | 10/23049  | 0.301709 | 0.549606 | 0.529672 | Cyp4f14/Sr  |
| GO_MF_mf:GO:005192peroxiredo 2/2529   | 10/23049  | 0.301709 | 0.549606 | 0.529672 | Prdx1/Prdx  |
| GO_MF_mf:GO:010299myristoyl-(C2/2529  | 10/23049  | 0.301709 | 0.549606 | 0.529672 | Acot1/Acoi  |
| GO_MF_mf:GO:000203p53 bindin10/2529   | 75/23049  | 0.305982 | 0.556919 | 0.536721 | Ankrd1/Blr  |
| GO_MF_mf:GO:004687metal ion t 52/2529 | 441/23049 | 0.310823 | 0.565251 | 0.54475  | Atp1b2/Atq  |
| GO_MF_mf:GO:001704Rho GTPas 20/2529   | 161/23049 | 0.31224  | 0.56735  | 0.546773 | Arhgap44/   |
| GO_MF_mf:GO:000452exodeoxyri 3/2529   | 18/23049  | 0.315831 | 0.572428 | 0.551667 | Aptx/Dclre  |
| GO_MF_mf:GO:000462phospholip 3/2529   | 18/23049  | 0.315831 | 0.572428 | 0.551667 | Adora1/Cc   |
| GO_MF_mf:GO:001689exodeoxyri 3/2529   | 18/23049  | 0.315831 | 0.572428 | 0.551667 | Aptx/Dclre  |
| GO_MF_mf:GO:000526potassium 16/2529   | 127/23049 | 0.317486 | 0.573635 | 0.55283  | Cnga2/Kcn   |
| GO_MF_mf:GO:001624channel re16/2529   | 127/23049 | 0.317486 | 0.573635 | 0.55283  | Atp2b4/Ca   |
| GO_MF_mf:GO:000467AMP-activ4/2529     | 26/23049  | 0.317562 | 0.573635 | 0.55283  | Gm14147/    |
| GO_MF_mf:GO:009863cell-cell ad4/2529  | 26/23049  | 0.317562 | 0.573635 | 0.55283  | Anxa2/Cnn   |
| GO_MF_mf:GO:000489cytokine re12/2529  | 93/23049  | 0.320799 | 0.578997 | 0.557998 | Ccr1/Ccl2/  |
| GO_MF_mf:GO:001704peptide ho 7/2529   | 51/23049  | 0.324971 | 0.586036 | 0.564782 | Avpr1a/Cal  |
| GO_MF_mf:GO:000472phosphopr 21/2529   | 171/23049 | 0.325551 | 0.586591 | 0.565316 | Cdc25a/Dr   |
| GO_MF_mf:GO:001988protein ph9/2529    | 68/23049  | 0.327987 | 0.590486 | 0.56907  | 2810408A1   |
| GO_MF_mf:GO:001507potassium 20/2529   | 163/23049 | 0.332527 | 0.59816  | 0.576466 | Atp1b2/Cn   |
| GO_MF_mf:GO:004529cadherin bi38/2529  | 321/23049 | 0.334093 | 0.600476 | 0.578698 | Abcf3/Abi1  |
| GO_MF_mf:GO:000531dicarboxyli 5/2529  | 35/23049  | 0.337864 | 0.601549 | 0.579731 | Folr2/Slc1a |
| GO_MF_mf:GO:000853Ran GTPas5/2529     | 35/23049  | 0.337864 | 0.601549 | 0.579731 | 1700123L1   |
| GO_MF_mf:GO:009863cell adhesi5/2529   | 35/23049  | 0.337864 | 0.601549 | 0.579731 | Anxa2/Cnn   |
| GO_MF_mf:GO:000468calmodulin4/2529    | 27/23049  | 0.343592 | 0.601549 | 0.579731 | Camk2a/Di   |
| GO_MF_mf:GO:000119transcriptic9/2529  | 69/23049  | 0.343964 | 0.601549 | 0.579731 | Ankrd1/Arr  |
| GO_MF_mf:GO:000414diacylglyce 2/2529  | 11/23049  | 0.344017 | 0.601549 | 0.579731 | Dgkh/Dgkc   |
| GO_MF_mf:GO:000479thioredoxir 2/2529  | 11/23049  | 0.344017 | 0.601549 | 0.579731 | Selenot/Txi |
| GO_MF_mf:GO:000504low-densit2/2529    | 11/23049  | 0.344017 | 0.601549 | 0.579731 | Cd36/Tnfai  |
| GO_MF_mf:GO:000524voltage-ga 2/2529   | 11/23049  | 0.344017 | 0.601549 | 0.579731 | Ano1/Clcn   |
| GO_MF_mf:GO:000856microtubul 2/2529   | 11/23049  | 0.344017 | 0.601549 | 0.579731 | Fign/Katna  |
| GO_MF_mf:GO:001538sodium:prc 2/2529   | 11/23049  | 0.344017 | 0.601549 | 0.579731 | Slc9a1/Slc9 |
| GO_MF_mf:GO:001681hydrolase ε2/2529   | 11/23049  | 0.344017 | 0.601549 | 0.579731 | Agmat/Arg   |
| GO_MF_mf:GO:001683aldehyde-l 2/2529   | 11/23049  | 0.344017 | 0.601549 | 0.579731 | Dera/Shmt   |
| GO_MF_mf:GO:001715semaphorin 2/2529   | 11/23049  | 0.344017 | 0.601549 | 0.579731 | Plxna2/Plxr |
| GO_MF_mf:GO:004737acylglycer 2/2529   | 11/23049  | 0.344017 | 0.601549 | 0.579731 | Abhd1/Mg    |
| GO_MF_mf:GO:007041co-SMAD I2/2529     | 11/23049  | 0.344017 | 0.601549 | 0.579731 | Smad6/Trir  |
| GO_MF_mf:GO:007041I-SMAD bi2/2529     | 11/23049  | 0.344017 | 0.601549 | 0.579731 | Smad6/Sm    |
| GO_MF_mf:GO:009720cysteine-ty 2/2529  | 11/23049  | 0.344017 | 0.601549 | 0.579731 | Casp6/Casp  |

|                                       |           |          |          |          |             |
|---------------------------------------|-----------|----------|----------|----------|-------------|
| GO_MF_mf:GO:199082sequence-:2/2529    | 11/23049  | 0.344017 | 0.601549 | 0.579731 | Fmr1/Srsf4  |
| GO_MF_mf:GO:000122transcriptic3/2529  | 19/23049  | 0.34732  | 0.601549 | 0.579731 | Hdac2/Nek   |
| GO_MF_mf:GO:000375protein dis3/2529   | 19/23049  | 0.34732  | 0.601549 | 0.579731 | Ero1l/Pdia6 |
| GO_MF_mf:GO:001686intramolec3/2529    | 19/23049  | 0.34732  | 0.601549 | 0.579731 | Ero1l/Pdia6 |
| GO_MF_mf:GO:001689endonucle3/2529     | 19/23049  | 0.34732  | 0.601549 | 0.579731 | Rida/Tsen2  |
| GO_MF_mf:GO:001704GTP-Rho b3/2529     | 19/23049  | 0.34732  | 0.601549 | 0.579731 | Cdc42ep5/   |
| GO_MF_mf:GO:003459phosphatic3/2529    | 19/23049  | 0.34732  | 0.601549 | 0.579731 | Ptpmt1/Syr  |
| GO_MF_mf:GO:004327phospholip3/2529    | 19/23049  | 0.34732  | 0.601549 | 0.579731 | Dgkq/Park3  |
| GO_MF_mf:GO:006178peptidogly3/2529    | 19/23049  | 0.34732  | 0.601549 | 0.579731 | 1700016DC   |
| GO_MF_mf:GO:009864cadherin bi3/2529   | 19/23049  | 0.34732  | 0.601549 | 0.579731 | Anxa2/Cnn   |
| GO_MF_mf:GO:000823cysteine-ty22/2529  | 182/23049 | 0.348022 | 0.601549 | 0.579731 | Blmh/Capn   |
| GO_MF_mf:GO:000524voltage-ga6/2529    | 44/23049  | 0.351798 | 0.601549 | 0.579731 | Cacnb2/Ca   |
| GO_MF_mf:GO:001671oxidoreduc8/2529    | 61/23049  | 0.352682 | 0.601549 | 0.579731 | Cyp2b10/C   |
| GO_MF_mf:GO:000371transcriptic31/2529 | 262/23049 | 0.355509 | 0.601549 | 0.579731 | Ankrd1/Asf  |
| GO_MF_mf:GO:009711scaffold pr9/2529   | 70/23049  | 0.360055 | 0.601549 | 0.579731 | Atp2b4/Ca   |
| GO_MF_mf:GO:000375peptidyl-pl5/2529   | 36/23049  | 0.360567 | 0.601549 | 0.579731 | Fkbp11/Fkl  |
| GO_MF_mf:GO:001921phosphata:5/2529    | 36/23049  | 0.360567 | 0.601549 | 0.579731 | 2810408A1   |
| GO_MF_mf:GO:00708EE-box bind5/2529    | 36/23049  | 0.360567 | 0.601549 | 0.579731 | Arntl/Clock |
| GO_MF_mf:GO:000453deoxyribor8/2529    | 62/23049  | 0.369941 | 0.601549 | 0.579731 | Aplf/Aptx/I |
| GO_MF_mf:GO:00007C mismatch k1/2529   | 4/23049   | 0.371816 | 0.601549 | 0.579731 | Pcna        |
| GO_MF_mf:GO:000099transcriptic1/2529  | 4/23049   | 0.371816 | 0.601549 | 0.579731 | Gtf3c3      |
| GO_MF_mf:GO:000103RNA polymr1/2529    | 4/23049   | 0.371816 | 0.601549 | 0.579731 | Maf1        |
| GO_MF_mf:GO:000103TFIIB-class 1/2529  | 4/23049   | 0.371816 | 0.601549 | 0.579731 | Tbp         |
| GO_MF_mf:GO:000185compleme1/2529      | 4/23049   | 0.371816 | 0.601549 | 0.579731 | Itgam       |
| GO_MF_mf:GO:000187lipopolysac1/2529   | 4/23049   | 0.371816 | 0.601549 | 0.579731 | Scarb1      |
| GO_MF_mf:GO:000206purine nucl1/2529   | 4/23049   | 0.371816 | 0.601549 | 0.579731 | Aprt        |
| GO_MF_mf:GO:0003842-acylglyce1/2529   | 4/23049   | 0.371816 | 0.601549 | 0.579731 | Dgat1       |
| GO_MF_mf:GO:0003876-phosphc1/2529     | 4/23049   | 0.371816 | 0.601549 | 0.579731 | Pfkfb1      |
| GO_MF_mf:GO:000394N-acetyllac1/2529   | 4/23049   | 0.371816 | 0.601549 | 0.579731 | B4gal3      |
| GO_MF_mf:GO:000395NAD+ nucl1/2529     | 4/23049   | 0.371816 | 0.601549 | 0.579731 | Art5        |
| GO_MF_mf:GO:000405arachidona1/2529    | 4/23049   | 0.371816 | 0.601549 | 0.579731 | Alox12      |
| GO_MF_mf:GO:000406arylamine l1/2529   | 4/23049   | 0.371816 | 0.601549 | 0.579731 | Nat2        |
| GO_MF_mf:GO:000406aryl sulfotr:1/2529 | 4/23049   | 0.371816 | 0.601549 | 0.579731 | Sult1a1     |
| GO_MF_mf:GO:000406arylsulfatas1/2529  | 4/23049   | 0.371816 | 0.601549 | 0.579731 | Arsb        |
| GO_MF_mf:GO:000409carnitine O1/2529   | 4/23049   | 0.371816 | 0.601549 | 0.579731 | Cpt2        |
| GO_MF_mf:GO:000414diacylglyce1/2529   | 4/23049   | 0.371816 | 0.601549 | 0.579731 | Dgat1       |
| GO_MF_mf:GO:000437glycerol kir1/2529  | 4/23049   | 0.371816 | 0.601549 | 0.579731 | Gk2         |
| GO_MF_mf:GO:000442inorganic c1/2529   | 4/23049   | 0.371816 | 0.601549 | 0.579731 | Prune1      |
| GO_MF_mf:GO:000444isocitrate d1/2529  | 4/23049   | 0.371816 | 0.601549 | 0.579731 | Idh3a       |
| GO_MF_mf:GO:000445L-lactate d1/2529   | 4/23049   | 0.371816 | 0.601549 | 0.579731 | Ldha        |
| GO_MF_mf:GO:000446leukotriene1/2529   | 4/23049   | 0.371816 | 0.601549 | 0.579731 | Ltc4s       |
| GO_MF_mf:GO:000446long-chain1/2529    | 4/23049   | 0.371816 | 0.601549 | 0.579731 | Acad11      |
| GO_MF_mf:GO:000447methenylte1/2529    | 4/23049   | 0.371816 | 0.601549 | 0.579731 | Mthfd1l     |
| GO_MF_mf:GO:000448methylenet1/2529    | 4/23049   | 0.371816 | 0.601549 | 0.579731 | Mthfd1l     |
| GO_MF_mf:GO:000459oxoglutar:1/2529    | 4/23049   | 0.371816 | 0.601549 | 0.579731 | Ogdhl       |
| GO_MF_mf:GO:000465procollage1/2529    | 4/23049   | 0.371816 | 0.601549 | 0.579731 | P4ha3       |
| GO_MF_mf:GO:000466protein ger1/2529   | 4/23049   | 0.371816 | 0.601549 | 0.579731 | Fnta        |
| GO_MF_mf:GO:000468myosin ligf1/2529   | 4/23049   | 0.371816 | 0.601549 | 0.579731 | Mylk2       |

|                                      |         |          |          |          |            |
|--------------------------------------|---------|----------|----------|----------|------------|
| GO_MF_m:GO:000469cAMP-dep 1/2529     | 4/23049 | 0.371816 | 0.601549 | 0.579731 | Prkacb     |
| GO_MF_m:GO:000470NF-kappaE 1/2529    | 4/23049 | 0.371816 | 0.601549 | 0.579731 | Ripk3      |
| GO_MF_m:GO:000474ribose pho:1/2529   | 4/23049 | 0.371816 | 0.601549 | 0.579731 | Prpsap2    |
| GO_MF_m:GO:000481arginine-tf 1/2529  | 4/23049 | 0.371816 | 0.601549 | 0.579731 | Rars2      |
| GO_MF_m:GO:000484uracil DNA 1/2529   | 4/23049 | 0.371816 | 0.601549 | 0.579731 | Ung        |
| GO_MF_m:GO:000489ciliary neur 1/2529 | 4/23049 | 0.371816 | 0.601549 | 0.579731 | Cntfr      |
| GO_MF_m:GO:000496histamine r 1/2529  | 4/23049 | 0.371816 | 0.601549 | 0.579731 | Hrh3       |
| GO_MF_m:GO:000497AMPA glut 1/2529    | 4/23049 | 0.371816 | 0.601549 | 0.579731 | Gria1      |
| GO_MF_m:GO:000504netrin rece 1/2529  | 4/23049 | 0.371816 | 0.601549 | 0.579731 | Unc5c      |
| GO_MF_m:GO:000508Ran guanyl 1/2529   | 4/23049 | 0.371816 | 0.601549 | 0.579731 | Sergef     |
| GO_MF_m:GO:000512scavenger 1/2529    | 4/23049 | 0.371816 | 0.601549 | 0.579731 | Fpr2       |
| GO_MF_m:GO:000525A-type (tra 1/2529  | 4/23049 | 0.371816 | 0.601549 | 0.579731 | Kcnd2      |
| GO_MF_m:GO:000527amine tran 1/2529   | 4/23049 | 0.371816 | 0.601549 | 0.579731 | Slc18a2    |
| GO_MF_m:GO:000812acetylester 1/2529  | 4/23049 | 0.371816 | 0.601549 | 0.579731 | Siae       |
| GO_MF_m:GO:000831single-strai 1/2529 | 4/23049 | 0.371816 | 0.601549 | 0.579731 | Pole       |
| GO_MF_m:GO:000900DNA-meth 1/2529     | 4/23049 | 0.371816 | 0.601549 | 0.579731 | Mettl4     |
| GO_MF_m:GO:000901tRNA (guar 1/2529   | 4/23049 | 0.371816 | 0.601549 | 0.579731 | Trmt10a    |
| GO_MF_m:GO:001048H3 histone 1/2529   | 4/23049 | 0.371816 | 0.601549 | 0.579731 | Kat2a      |
| GO_MF_m:GO:001518L-aspartate 1/2529  | 4/23049 | 0.371816 | 0.601549 | 0.579731 | Slc38a7    |
| GO_MF_m:GO:001518L-glutamin 1/2529   | 4/23049 | 0.371816 | 0.601549 | 0.579731 | Slc38a7    |
| GO_MF_m:GO:001630tRNA (urac 1/2529   | 4/23049 | 0.371816 | 0.601549 | 0.579731 | 6430573F1  |
| GO_MF_m:GO:001641O-palmitoy 1/2529   | 4/23049 | 0.371816 | 0.601549 | 0.579731 | Cpt2       |
| GO_MF_m:GO:001711single-strai 1/2529 | 4/23049 | 0.371816 | 0.601549 | 0.579731 | Helq       |
| GO_MF_m:GO:001976IgE receptc 1/2529  | 4/23049 | 0.371816 | 0.601549 | 0.579731 | Ms4a2      |
| GO_MF_m:GO:002302MHC class 1/2529    | 4/23049 | 0.371816 | 0.601549 | 0.579731 | Fam49b     |
| GO_MF_m:GO:003022very-low-c 1/2529   | 4/23049 | 0.371816 | 0.601549 | 0.579731 | Vldlr      |
| GO_MF_m:GO:003029transmemk 1/2529    | 4/23049 | 0.371816 | 0.601549 | 0.579731 | Dgkq       |
| GO_MF_m:GO:003094mitochond 1/2529    | 4/23049 | 0.371816 | 0.601549 | 0.579731 | Timm22     |
| GO_MF_m:GO:003098kininogen l 1/2529  | 4/23049 | 0.371816 | 0.601549 | 0.579731 | Ctsl       |
| GO_MF_m:GO:003172haptoglobi 1/2529   | 4/23049 | 0.371816 | 0.601549 | 0.579731 | Hbb-bs     |
| GO_MF_m:GO:003172hemoglobi 1/2529    | 4/23049 | 0.371816 | 0.601549 | 0.579731 | Hbb-bs     |
| GO_MF_m:GO:003213single base 1/2529  | 4/23049 | 0.371816 | 0.601549 | 0.579731 | Msh3       |
| GO_MF_m:GO:003242purine-rich 1/2529  | 4/23049 | 0.371816 | 0.601549 | 0.579731 | Purg       |
| GO_MF_m:GO:003289palmitoyl-( 1/2529  | 4/23049 | 0.371816 | 0.601549 | 0.579731 | Scd4       |
| GO_MF_m:GO:003330dehydroasc 1/2529   | 4/23049 | 0.371816 | 0.601549 | 0.579731 | Slc2a1     |
| GO_MF_m:GO:003418apolipopro 1/2529   | 4/23049 | 0.371816 | 0.601549 | 0.579731 | Scarb1     |
| GO_MF_m:GO:003423GPI anchor 1/2529   | 4/23049 | 0.371816 | 0.601549 | 0.579731 | Pigu       |
| GO_MF_m:GO:003459phosphatic 1/2529   | 4/23049 | 0.371816 | 0.601549 | 0.579731 | Tmem55a    |
| GO_MF_m:GO:003524protein-arç 1/2529  | 4/23049 | 0.371816 | 0.601549 | 0.579731 | Ndufaf7    |
| GO_MF_m:GO:003527ethanol bir 1/2529  | 4/23049 | 0.371816 | 0.601549 | 0.579731 | Adh1       |
| GO_MF_m:GO:003565AP-1 adap 1/2529    | 4/23049 | 0.371816 | 0.601549 | 0.579731 | Rab32      |
| GO_MF_m:GO:003810nodal bind 1/2529   | 4/23049 | 0.371816 | 0.601549 | 0.579731 | Cfc1       |
| GO_MF_m:GO:004353angiostatin 1/2529  | 4/23049 | 0.371816 | 0.601549 | 0.579731 | Atp5a1     |
| GO_MF_m:GO:004723glucuronos 1/2529   | 4/23049 | 0.371816 | 0.601549 | 0.579731 | Csgalnact1 |
| GO_MF_m:GO:005050hyaluronan 1/2529   | 4/23049 | 0.371816 | 0.601549 | 0.579731 | Has2       |
| GO_MF_m:GO:005173polynucleo 1/2529   | 4/23049 | 0.371816 | 0.601549 | 0.579731 | N4bp2      |
| GO_MF_m:GO:005265NADP-retii 1/2529   | 4/23049 | 0.371816 | 0.601549 | 0.579731 | Akr1b10    |
| GO_MF_m:GO:005505D-glucose 1/2529    | 4/23049 | 0.371816 | 0.601549 | 0.579731 | Slc2a1     |

|                                       |           |          |          |          |              |
|---------------------------------------|-----------|----------|----------|----------|--------------|
| GO_MF_mf:GO:006182telomeric [1/2529   | 4/23049   | 0.371816 | 0.601549 | 0.579731 | Blm          |
| GO_MF_mf:GO:007001oligopeptic 1/2529  | 4/23049   | 0.371816 | 0.601549 | 0.579731 | Nln          |
| GO_MF_mf:GO:007005collagen V 1/2529   | 4/23049   | 0.371816 | 0.601549 | 0.579731 | 2300002M:    |
| GO_MF_mf:GO:007005thrombosp 1/2529    | 4/23049   | 0.371816 | 0.601549 | 0.579731 | Cd36         |
| GO_MF_mf:GO:007013ubiquitin-li 1/2529 | 4/23049   | 0.371816 | 0.601549 | 0.579731 | Senp1        |
| GO_MF_mf:GO:007013SUMO-spe 1/2529     | 4/23049   | 0.371816 | 0.601549 | 0.579731 | Senp1        |
| GO_MF_mf:GO:007032very-low-c 1/2529   | 4/23049   | 0.371816 | 0.601549 | 0.579731 | Pcsk9        |
| GO_MF_mf:GO:007040NADH binc 1/2529    | 4/23049   | 0.371816 | 0.601549 | 0.579731 | Rnls         |
| GO_MF_mf:GO:007054L-phenylal: 1/2529  | 4/23049   | 0.371816 | 0.601549 | 0.579731 | Got1         |
| GO_MF_mf:GO:008607gap junctio 1/2529  | 4/23049   | 0.371816 | 0.601549 | 0.579731 | Gjc1         |
| GO_MF_mf:GO:009055phosphatic 1/2529   | 4/23049   | 0.371816 | 0.601549 | 0.579731 | Abcb1a       |
| GO_MF_mf:GO:009750deaminate 1/2529    | 4/23049   | 0.371816 | 0.601549 | 0.579731 | Ung          |
| GO_MF_mf:GO:009764amylin rec 1/2529   | 4/23049   | 0.371816 | 0.601549 | 0.579731 | Calcr        |
| GO_MF_mf:GO:009764calcitonin f 1/2529 | 4/23049   | 0.371816 | 0.601549 | 0.579731 | Calcr        |
| GO_MF_mf:GO:009851polynucleo 1/2529   | 4/23049   | 0.371816 | 0.601549 | 0.579731 | Aptx         |
| GO_MF_mf:GO:009910channel aci 1/2529  | 4/23049   | 0.371816 | 0.601549 | 0.579731 | Lrrc26       |
| GO_MF_mf:GO:009910potassium 1/2529    | 4/23049   | 0.371816 | 0.601549 | 0.579731 | Lrrc26       |
| GO_MF_mf:GO:014013mechanos 1/2529     | 4/23049   | 0.371816 | 0.601549 | 0.579731 | Trpv4        |
| GO_MF_mf:GO:1990593' overhan 1/2529   | 4/23049   | 0.371816 | 0.601549 | 0.579731 | Xrcc1        |
| GO_MF_mf:GO:000438guanylate (3/2529   | 20/23049  | 0.378653 | 0.611692 | 0.589507 | Adcy4/Guc    |
| GO_MF_mf:GO:003423protein kin 3/2529  | 20/23049  | 0.378653 | 0.611692 | 0.589507 | Akap14/Ak    |
| GO_MF_mf:GO:000484ubiquitin-c 51/2529 | 443/23049 | 0.379028 | 0.611839 | 0.589648 | Arih2/Asb1   |
| GO_MF_mf:GO:000550copper ion 7/2529   | 54/23049  | 0.380717 | 0.613024 | 0.590791 | Aoc1/Aoc3    |
| GO_MF_mf:GO:000484thiol-depe 10/2529  | 80/23049  | 0.381366 | 0.613024 | 0.590791 | Eif3f/Mindy  |
| GO_MF_mf:GO:001517amino acid 10/2529  | 80/23049  | 0.381366 | 0.613024 | 0.590791 | AU018091/    |
| GO_MF_mf:GO:001640palmitoyltr 5/2529  | 37/23049  | 0.383306 | 0.613024 | 0.590791 | Cpt2/Sptlc:  |
| GO_MF_mf:GO:003136translation 5/2529  | 37/23049  | 0.383306 | 0.613024 | 0.590791 | Eif3f/Eif4e/ |
| GO_MF_mf:GO:000029adenine nu 2/2529   | 12/23049  | 0.385452 | 0.613024 | 0.590791 | Slc25a23/S   |
| GO_MF_mf:GO:000105RNA polym 2/2529    | 12/23049  | 0.385452 | 0.613024 | 0.590791 | Polr2f/Polr: |
| GO_MF_mf:GO:000160G-protein (2/2529   | 12/23049  | 0.385452 | 0.613024 | 0.590791 | P2ry1/P2ry   |
| GO_MF_mf:GO:000534purine ribo 2/2529  | 12/23049  | 0.385452 | 0.613024 | 0.590791 | Slc25a23/S   |
| GO_MF_mf:GO:000545monovalen 2/2529    | 12/23049  | 0.385452 | 0.613024 | 0.590791 | Slc9a1/Slc9  |
| GO_MF_mf:GO:000553glucose bir 2/2529  | 12/23049  | 0.385452 | 0.613024 | 0.590791 | Gys1/Ugp2    |
| GO_MF_mf:GO:001521purine nuc 2/2529   | 12/23049  | 0.385452 | 0.613024 | 0.590791 | Slc25a23/S   |
| GO_MF_mf:GO:001650peptidase (2/2529   | 12/23049  | 0.385452 | 0.613024 | 0.590791 | Pycard/Tnf   |
| GO_MF_mf:GO:001701MAP kinas 2/2529    | 12/23049  | 0.385452 | 0.613024 | 0.590791 | Dusp5/Dus    |
| GO_MF_mf:GO:003054receptor ac 2/2529  | 12/23049  | 0.385452 | 0.613024 | 0.590791 | Cdk5/Dgkc    |
| GO_MF_mf:GO:003173CCR6 chen 2/2529    | 12/23049  | 0.385452 | 0.613024 | 0.590791 | Ccl20/Defb   |
| GO_MF_mf:GO:004502G-protein (2/2529   | 12/23049  | 0.385452 | 0.613024 | 0.590791 | P2ry1/P2ry   |
| GO_MF_mf:GO:007234modified a 2/2529   | 12/23049  | 0.385452 | 0.613024 | 0.590791 | Folr2/Slc46  |
| GO_MF_mf:GO:014016monocarbc 2/2529    | 12/23049  | 0.385452 | 0.613024 | 0.590791 | Slc10a4/Slc  |
| GO_MF_mf:GO:199038Lys48-spec 2/2529   | 12/23049  | 0.385452 | 0.613024 | 0.590791 | Mindy2/Us    |
| GO_MF_mf:GO:199084promoter-: 6/2529   | 46/23049  | 0.392618 | 0.623961 | 0.601331 | Foxc1/Hda    |
| GO_MF_mf:GO:000440histone de: 4/2529  | 29/23049  | 0.395661 | 0.626949 | 0.60421  | Hdac1/Hda    |
| GO_MF_mf:GO:000462phospholi 4/2529    | 29/23049  | 0.395661 | 0.626949 | 0.60421  | Abhd1/Pla:   |
| GO_MF_mf:GO:007071poly-purin 4/2529   | 29/23049  | 0.395661 | 0.626949 | 0.60421  | Fmr1/Pabp    |
| GO_MF_mf:GO:007250divalent inc 4/2529 | 29/23049  | 0.395661 | 0.626949 | 0.60421  | Slc30a3/Slc  |
| GO_MF_mf:GO:000823exopectida 12/2529  | 99/23049  | 0.403145 | 0.638338 | 0.615187 | Apeh/Blmh    |



|                                         |           |          |          |          |             |
|-----------------------------------------|-----------|----------|----------|----------|-------------|
| GO_MF_mf:GO:000510 frizzled bin 5/2529  | 38/23049  | 0.406005 | 0.640983 | 0.617736 | Cthrc1/Wn   |
| GO_MF_mf:GO:000839 arachidonic 5/2529   | 38/23049  | 0.406005 | 0.640983 | 0.617736 | Cyp2b10/C   |
| GO_MF_mf:GO:001665 oxidoreduc 5/2529    | 38/23049  | 0.406005 | 0.640983 | 0.617736 | Cbr4/Nduf   |
| GO_MF_mf:GO:001685 cis-trans is 5/2529  | 38/23049  | 0.406005 | 0.640983 | 0.617736 | Fkbp11/Fkl  |
| GO_MF_mf:GO:000401 phospholip 3/2529    | 21/23049  | 0.409649 | 0.645261 | 0.621859 | Abcb1a/At   |
| GO_MF_mf:GO:000401 adenylate c 3/2529   | 21/23049  | 0.409649 | 0.645261 | 0.621859 | Adcy4/Guc   |
| GO_MF_mf:GO:001640 C-acyltrans 3/2529   | 21/23049  | 0.409649 | 0.645261 | 0.621859 | Acsm5/Spt   |
| GO_MF_mf:GO:000813 translation 10/2529  | 82/23049  | 0.412034 | 0.645261 | 0.621859 | Abtb1/Cpe   |
| GO_MF_mf:GO:000524 voltage-ga 11/2529   | 91/23049  | 0.414767 | 0.645261 | 0.621859 | Cnga2/Kcn   |
| GO_MF_mf:GO:000554 phospholip 7/2529    | 56/23049  | 0.418107 | 0.645261 | 0.621859 | Abcb1a/At   |
| GO_MF_mf:GO:001978 ubiquitin-li 13/2529 | 109/23049 | 0.418987 | 0.645261 | 0.621859 | Eif3f/Mindy |
| GO_MF_mf:GO:000196 fibronectin 4/2529   | 30/23049  | 0.421478 | 0.645261 | 0.621859 | 2300002M:   |
| GO_MF_mf:GO:000395 NADH deh 4/2529      | 30/23049  | 0.421478 | 0.645261 | 0.621859 | Ndufa12/N   |
| GO_MF_mf:GO:003355 protein de 4/2529    | 30/23049  | 0.421478 | 0.645261 | 0.621859 | Hdac1/Hda   |
| GO_MF_mf:GO:005153 iron-sulfur 8/2529   | 65/23049  | 0.421959 | 0.645261 | 0.621859 | Abat/Dpyd   |
| GO_MF_mf:GO:005154 metal clust 8/2529   | 65/23049  | 0.421959 | 0.645261 | 0.621859 | Abat/Dpyd   |
| GO_MF_mf:GO:014003 modificatic 15/2529  | 127/23049 | 0.422064 | 0.645261 | 0.621859 | Babam2/M    |
| GO_MF_mf:GO:000430 estradiol 1 2/2529   | 13/23049  | 0.425694 | 0.645261 | 0.621859 | Hsd17b3/H   |
| GO_MF_mf:GO:000533 nucleotide 2/2529    | 13/23049  | 0.425694 | 0.645261 | 0.621859 | Slc35a5/Slc |
| GO_MF_mf:GO:000552 tropomyos 2/2529     | 13/23049  | 0.425694 | 0.645261 | 0.621859 | Pycard/Tm   |
| GO_MF_mf:GO:000554 folic acid b 2/2529  | 13/23049  | 0.425694 | 0.645261 | 0.621859 | Folr2/Slc46 |
| GO_MF_mf:GO:000819 phosphatic 2/2529    | 13/23049  | 0.425694 | 0.645261 | 0.621859 | Lpin3/Plpp  |
| GO_MF_mf:GO:000830 DNA bindir 2/2529    | 13/23049  | 0.425694 | 0.645261 | 0.621859 | Foxc1/Sry   |
| GO_MF_mf:GO:000848 sulfuric est 2/2529  | 13/23049  | 0.425694 | 0.645261 | 0.621859 | Arsb/Galns  |
| GO_MF_mf:GO:000998 pseudouric 2/2529    | 13/23049  | 0.425694 | 0.645261 | 0.621859 | Rpusd1/Tru  |
| GO_MF_mf:GO:001018 FMN bindir 2/2529    | 13/23049  | 0.425694 | 0.645261 | 0.621859 | Mtrr/Por    |
| GO_MF_mf:GO:001642 tRNA (guar 2/2529    | 13/23049  | 0.425694 | 0.645261 | 0.621859 | Trmt1/Trm   |
| GO_MF_mf:GO:001984 retinol binc 2/2529  | 13/23049  | 0.425694 | 0.645261 | 0.621859 | Crabp1/Rb   |
| GO_MF_mf:GO:003199 insulin-like 2/2529  | 13/23049  | 0.425694 | 0.645261 | 0.621859 | Igfbp3/Itga |
| GO_MF_mf:GO:004529 alpha-cate 2/2529    | 13/23049  | 0.425694 | 0.645261 | 0.621859 | Cdh1/Cdh2   |
| GO_MF_mf:GO:007074 C2H2 zinc 2/2529     | 13/23049  | 0.425694 | 0.645261 | 0.621859 | Taf9/Wt1    |
| GO_MF_mf:GO:007161 lysophosph 2/2529    | 13/23049  | 0.425694 | 0.645261 | 0.621859 | Agpat2/Lpi  |
| GO_MF_mf:GO:009761 annealing 2/2529     | 13/23049  | 0.425694 | 0.645261 | 0.621859 | Blm/Fmr1    |
| GO_MF_mf:GO:000120 transcriptic 5/2529  | 39/23049  | 0.428592 | 0.645261 | 0.621859 | Esrrb/Foxa1 |
| GO_MF_mf:GO:000418 carboxypep 5/2529    | 39/23049  | 0.428592 | 0.645261 | 0.621859 | Cpm/Cpv1/   |
| GO_MF_mf:GO:004418 protein bin 5/2529   | 39/23049  | 0.428592 | 0.645261 | 0.621859 | Cct3/Dffa1  |
| GO_MF_mf:GO:005187 Hsp90 prot 5/2529    | 39/23049  | 0.428592 | 0.645261 | 0.621859 | Arntl/Fkbp1 |
| GO_MF_mf:GO:009952 neurotrans 5/2529    | 39/23049  | 0.428592 | 0.645261 | 0.621859 | Chrne/Chrr  |
| GO_MF_mf:GO:000449 monooxyg 17/2529     | 146/23049 | 0.435949 | 0.645261 | 0.621859 | Akr1c12/Cy  |
| GO_MF_mf:GO:000098 transcriptic 3/2529  | 22/23049  | 0.440149 | 0.645261 | 0.621859 | Dach1/Taf4  |
| GO_MF_mf:GO:000538 zinc ion tra 3/2529  | 22/23049  | 0.440149 | 0.645261 | 0.621859 | Slc30a3/Slc |
| GO_MF_mf:GO:001512 bile acid tra 3/2529 | 22/23049  | 0.440149 | 0.645261 | 0.621859 | Abcc3/Slc1  |
| GO_MF_mf:GO:001920 carbohydr 3/2529     | 22/23049  | 0.440149 | 0.645261 | 0.621859 | Adk/Pfkfb1  |
| GO_MF_mf:GO:009007 translation 3/2529   | 22/23049  | 0.440149 | 0.645261 | 0.621859 | Cpeb3/Cpe   |
| GO_MF_mf:GO:009048 vitamin tra 3/2529   | 22/23049  | 0.440149 | 0.645261 | 0.621859 | Folr2/Slc2a |
| GO_MF_mf:GO:000009 sulfur amin 1/2529   | 5/23049   | 0.440754 | 0.645261 | 0.621859 | Slc38a7     |
| GO_MF_mf:GO:000026 peroxisom 1/2529     | 5/23049   | 0.440754 | 0.645261 | 0.621859 | Pex5        |
| GO_MF_mf:GO:000103 RNA polym 1/2529     | 5/23049   | 0.440754 | 0.645261 | 0.621859 | Maf1        |

|                    |                                                    |         |          |          |          |          |
|--------------------|----------------------------------------------------|---------|----------|----------|----------|----------|
| GO_MF_mf:GO:000103 | RNA polymerase activity                            | 5/23049 | 0.440754 | 0.645261 | 0.621859 | Maf1     |
| GO_MF_mf:GO:000104 | transcription                                      | 5/23049 | 0.440754 | 0.645261 | 0.621859 | Tbp      |
| GO_MF_mf:GO:000122 | RNA polymerase activity                            | 5/23049 | 0.440754 | 0.645261 | 0.621859 | Hdac2    |
| GO_MF_mf:GO:000153 | N-acetylglucosaminyl transferase activity          | 5/23049 | 0.440754 | 0.645261 | 0.621859 | Chst13   |
| GO_MF_mf:GO:000382 | alpha-N-acetylglucosaminyl transferase activity    | 5/23049 | 0.440754 | 0.645261 | 0.621859 | St8sia3  |
| GO_MF_mf:GO:000383 | beta-N-acetylglucosaminyl transferase activity     | 5/23049 | 0.440754 | 0.645261 | 0.621859 | B4galt3  |
| GO_MF_mf:GO:000395 | acyl-CoA ligase activity                           | 5/23049 | 0.440754 | 0.645261 | 0.621859 | Acsm5    |
| GO_MF_mf:GO:000404 | aminoacyl-tRNA synthetase activity                 | 5/23049 | 0.440754 | 0.645261 | 0.621859 | Pthr2    |
| GO_MF_mf:GO:000430 | exopolyphosphatase activity                        | 5/23049 | 0.440754 | 0.645261 | 0.621859 | Prune1   |
| GO_MF_mf:GO:000431 | farnesyltransferase activity                       | 5/23049 | 0.440754 | 0.645261 | 0.621859 | Fdft1    |
| GO_MF_mf:GO:000436 | glycerol-3-phosphate 1-phosphatase activity        | 5/23049 | 0.440754 | 0.645261 | 0.621859 | Gpam     |
| GO_MF_mf:GO:000461 | phosphoglycerate kinase activity                   | 5/23049 | 0.440754 | 0.645261 | 0.621859 | Pgm3     |
| GO_MF_mf:GO:000462 | phosphopyruvate kinase activity                    | 5/23049 | 0.440754 | 0.645261 | 0.621859 | Eno3     |
| GO_MF_mf:GO:000468 | phosphorylation                                    | 5/23049 | 0.440754 | 0.645261 | 0.621859 | Phkb     |
| GO_MF_mf:GO:000470 | JUN kinase activity                                | 5/23049 | 0.440754 | 0.645261 | 0.621859 | Map3k10  |
| GO_MF_mf:GO:000472 | non-membrane spanning protein kinase activity      | 5/23049 | 0.440754 | 0.645261 | 0.621859 | Ptpn4    |
| GO_MF_mf:GO:000476 | steroid delta(1)-dehydrogenase activity            | 5/23049 | 0.440754 | 0.645261 | 0.621859 | Hsd3b3   |
| GO_MF_mf:GO:000478 | superoxide dismutase activity                      | 5/23049 | 0.440754 | 0.645261 | 0.621859 | Nqo1     |
| GO_MF_mf:GO:000482 | phenylalanine hydroxylase activity                 | 5/23049 | 0.440754 | 0.645261 | 0.621859 | Lrrc47   |
| GO_MF_mf:GO:000511 | type 2 fibroblast growth factor receptor activity  | 5/23049 | 0.440754 | 0.645261 | 0.621859 | Fgf7     |
| GO_MF_mf:GO:000514 | interleukin-1 receptor activity                    | 5/23049 | 0.440754 | 0.645261 | 0.621859 | Il12b    |
| GO_MF_mf:GO:000833 | low voltage-activated calcium channel activity     | 5/23049 | 0.440754 | 0.645261 | 0.621859 | Catsper3 |
| GO_MF_mf:GO:000837 | thioredoxin reductase activity                     | 5/23049 | 0.440754 | 0.645261 | 0.621859 | Prdx1    |
| GO_MF_mf:GO:000937 | four-way junction endonuclease activity            | 5/23049 | 0.440754 | 0.645261 | 0.621859 | Blm      |
| GO_MF_mf:GO:001095 | anaphase-promoting complex activity                | 5/23049 | 0.440754 | 0.645261 | 0.621859 | Cdc20    |
| GO_MF_mf:GO:001520 | urea transaminase activity                         | 5/23049 | 0.440754 | 0.645261 | 0.621859 | Slc14a2  |
| GO_MF_mf:GO:001537 | anion:sodium symporter activity                    | 5/23049 | 0.440754 | 0.645261 | 0.621859 | Slc12a2  |
| GO_MF_mf:GO:001561 | DNA translation                                    | 5/23049 | 0.440754 | 0.645261 | 0.621859 | Fbxo18   |
| GO_MF_mf:GO:001617 | NAD(P)H oxidase activity                           | 5/23049 | 0.440754 | 0.645261 | 0.621859 | Aifm1    |
| GO_MF_mf:GO:001631 | inositol bisphosphate 3-kinase activity            | 5/23049 | 0.440754 | 0.645261 | 0.621859 | Bpnt1    |
| GO_MF_mf:GO:001672 | oxidoreductase activity                            | 5/23049 | 0.440754 | 0.645261 | 0.621859 | Nqo1     |
| GO_MF_mf:GO:001677 | diphosphatase activity                             | 5/23049 | 0.440754 | 0.645261 | 0.621859 | Prpsap2  |
| GO_MF_mf:GO:001683 | oxo-acid-lipoxygenase activity                     | 5/23049 | 0.440754 | 0.645261 | 0.621859 | Clybl    |
| GO_MF_mf:GO:001710 | 5'-flap endonuclease activity                      | 5/23049 | 0.440754 | 0.645261 | 0.621859 | Fen1     |
| GO_MF_mf:GO:001881 | 3-hydroxyacyl-CoA lyase activity                   | 5/23049 | 0.440754 | 0.645261 | 0.621859 | Hsd17b4  |
| GO_MF_mf:GO:002284 | glutamate decarboxylase activity                   | 5/23049 | 0.440754 | 0.645261 | 0.621859 | Grin2b   |
| GO_MF_mf:GO:003025 | protein tyrosine kinase activity                   | 5/23049 | 0.440754 | 0.645261 | 0.621859 | Hyal2    |
| GO_MF_mf:GO:003062 | U4 snRNA binding                                   | 5/23049 | 0.440754 | 0.645261 | 0.621859 | Prpf4    |
| GO_MF_mf:GO:003184 | olfactory receptor activity                        | 5/23049 | 0.440754 | 0.645261 | 0.621859 | Reep1    |
| GO_MF_mf:GO:003240 | MutSalpha binding                                  | 5/23049 | 0.440754 | 0.645261 | 0.621859 | Atr      |
| GO_MF_mf:GO:003255 | pyrimidine nucleoside diphosphate kinase activity  | 5/23049 | 0.440754 | 0.645261 | 0.621859 | Ugp2     |
| GO_MF_mf:GO:003355 | RNA strand invasion                                | 5/23049 | 0.440754 | 0.645261 | 0.621859 | Fmr1     |
| GO_MF_mf:GO:003404 | lipid transfer                                     | 5/23049 | 0.440754 | 0.645261 | 0.621859 | Abcc3    |
| GO_MF_mf:GO:003448 | chondroitinase activity                            | 5/23049 | 0.440754 | 0.645261 | 0.621859 | Chst13   |
| GO_MF_mf:GO:003451 | box H/ACA small ribonucleoprotein complex activity | 5/23049 | 0.440754 | 0.645261 | 0.621859 | Nop10    |
| GO_MF_mf:GO:004693 | phosphatase activity                               | 5/23049 | 0.440754 | 0.645261 | 0.621859 | Pik3r6   |
| GO_MF_mf:GO:004824 | CXCR3 chemokine receptor activity                  | 5/23049 | 0.440754 | 0.645261 | 0.621859 | Cxcl10   |
| GO_MF_mf:GO:005005 | leukotriene synthase activity                      | 5/23049 | 0.440754 | 0.645261 | 0.621859 | Cyp4f14  |

|                    |                     |           |          |          |          |                 |
|--------------------|---------------------|-----------|----------|----------|----------|-----------------|
| GO_MF_mf:GO:005102 | Rho GDP-c1/2529     | 5/23049   | 0.440754 | 0.645261 | 0.621859 | Plxnb3          |
| GO_MF_mf:GO:005281 | phosphatic1/2529    | 5/23049   | 0.440754 | 0.645261 | 0.621859 | Pik3r6          |
| GO_MF_mf:GO:005513 | C3HC4-tyr1/2529     | 5/23049   | 0.440754 | 0.645261 | 0.621859 | Hspa1a          |
| GO_MF_mf:GO:007006 | fructose bis1/2529  | 5/23049   | 0.440754 | 0.645261 | 0.621859 | Pfkfb3          |
| GO_MF_mf:GO:007008 | chromo sh1/2529     | 5/23049   | 0.440754 | 0.645261 | 0.621859 | Lbr             |
| GO_MF_mf:GO:007012 | isopeptidase1/2529  | 5/23049   | 0.440754 | 0.645261 | 0.621859 | Senp1           |
| GO_MF_mf:GO:007073 | protein-glu1/2529   | 5/23049   | 0.440754 | 0.645261 | 0.621859 | Tp53            |
| GO_MF_mf:GO:007107 | eukaryotic 1/2529   | 5/23049   | 0.440754 | 0.645261 | 0.621859 | Myc             |
| GO_MF_mf:GO:007155 | histone der1/2529   | 5/23049   | 0.440754 | 0.645261 | 0.621859 | Kdm6b           |
| GO_MF_mf:GO:008005 | 5S rDNA bi1/2529    | 5/23049   | 0.440754 | 0.645261 | 0.621859 | Maf1            |
| GO_MF_mf:GO:008600 | voltage-ga1/2529    | 5/23049   | 0.440754 | 0.645261 | 0.621859 | Cacnb2          |
| GO_MF_mf:GO:009072 | receptor-r1/2529    | 5/23049   | 0.440754 | 0.645261 | 0.621859 | Htr1a           |
| GO_MF_mf:GO:009719 | cysteine-ty1/2529   | 5/23049   | 0.440754 | 0.645261 | 0.621859 | Casp8           |
| GO_MF_mf:GO:009851 | nucleotide 1/2529   | 5/23049   | 0.440754 | 0.645261 | 0.621859 | Ntpr            |
| GO_MF_mf:GO:190376 | gap junctio1/2529   | 5/23049   | 0.440754 | 0.645261 | 0.621859 | Gjc1            |
| GO_MF_mf:GO:001678 | transferase9/2529   | 75/23049  | 0.441196 | 0.645471 | 0.622061 | Chst13/Dsg1     |
| GO_MF_mf:GO:000419 | cysteine-ty10/2529  | 84/23049  | 0.442707 | 0.646802 | 0.623343 | Blmh/Capn1      |
| GO_MF_mf:GO:009910 | ion channe10/2529   | 84/23049  | 0.442707 | 0.646802 | 0.623343 | Cacnb2/Cacnb1   |
| GO_MF_mf:GO:000369 | single-strai12/2529 | 102/23049 | 0.444866 | 0.649516 | 0.62596  | Aptx/Blm/Egfr   |
| GO_MF_mf:GO:000400 | ATP-deper4/2529     | 31/23049  | 0.447017 | 0.650014 | 0.626439 | Blm/Fbxo1       |
| GO_MF_mf:GO:000513 | type I inter4/2529  | 31/23049  | 0.447017 | 0.650014 | 0.626439 | Gm13271/Ints1   |
| GO_MF_mf:GO:001714 | Wnt-prote4/2529     | 31/23049  | 0.447017 | 0.650014 | 0.626439 | Cthrc1/Lrp6     |
| GO_MF_mf:GO:003050 | spectrin bir4/2529  | 31/23049  | 0.447017 | 0.650014 | 0.626439 | Epb41/Gnk3      |
| GO_MF_mf:GO:004342 | bHLH trans4/2529    | 31/23049  | 0.447017 | 0.650014 | 0.626439 | Arntl/Lmo2      |
| GO_MF_mf:GO:004687 | ephrin rece4/2529   | 31/23049  | 0.447017 | 0.650014 | 0.626439 | Cdk5/Chn1       |
| GO_MF_mf:GO:001978 | ubiquitin-li52/2529 | 463/23049 | 0.450878 | 0.654482 | 0.630745 | Arih2/Asb1      |
| GO_MF_mf:GO:001921 | deacetylase5/2529   | 40/23049  | 0.451    | 0.654482 | 0.630745 | Hdac1/Hdac2     |
| GO_MF_mf:GO:003245 | demethylase5/2529   | 40/23049  | 0.451    | 0.654482 | 0.630745 | Cyp3a11/Klf14   |
| GO_MF_mf:GO:001670 | oxidoreduc6/2529    | 49/23049  | 0.453553 | 0.657744 | 0.633889 | Akr1c12/Cybb    |
| GO_MF_mf:GO:000370 | steroid hor7/2529   | 58/23049  | 0.455286 | 0.659812 | 0.635882 | Esrrb/Nr1h3     |
| GO_MF_mf:GO:000801 | beta-caten10/2529   | 85/23049  | 0.457989 | 0.663283 | 0.639227 | Ash2l/Cdh1      |
| GO_MF_mf:GO:000104 | core prom18/2529    | 157/23049 | 0.459008 | 0.663582 | 0.639515 | Ifi202/Arntl    |
| GO_MF_mf:GO:000202 | protease bi17/2529  | 148/23049 | 0.459083 | 0.663582 | 0.639515 | Anxa2/Cstf      |
| GO_MF_mf:GO:000377 | motor acti15/2529   | 130/23049 | 0.459118 | 0.663582 | 0.639515 | Cgn/Dnah1       |
| GO_MF_mf:GO:000033 | RNA cap b2/2529     | 14/23049  | 0.464508 | 0.664684 | 0.640577 | Eif4e/Fmr1      |
| GO_MF_mf:GO:000197 | retinoic aci2/2529  | 14/23049  | 0.464508 | 0.664684 | 0.640577 | Crabp1/Igf1     |
| GO_MF_mf:GO:000531 | L-glutamat2/2529    | 14/23049  | 0.464508 | 0.664684 | 0.640577 | Slc1a7/Slc3a2   |
| GO_MF_mf:GO:000832 | protein tra2/2529   | 14/23049  | 0.464508 | 0.664684 | 0.640577 | Timm17b/Trp     |
| GO_MF_mf:GO:000832 | signaling p2/2529   | 14/23049  | 0.464508 | 0.664684 | 0.640577 | Cd36/Scart1     |
| GO_MF_mf:GO:001535 | secondary 2/2529    | 14/23049  | 0.464508 | 0.664684 | 0.640577 | Slc10a4/Slc12a7 |
| GO_MF_mf:GO:003313 | acetylcholin2/2529  | 14/23049  | 0.464508 | 0.664684 | 0.640577 | Ly6e/Rapsr      |
| GO_MF_mf:GO:003818 | pattern rec2/2529   | 14/23049  | 0.464508 | 0.664684 | 0.640577 | Cd36/Scart1     |
| GO_MF_mf:GO:004204 | neurexin fa2/2529   | 14/23049  | 0.464508 | 0.664684 | 0.640577 | Nlgn3/Sytl1     |
| GO_MF_mf:GO:004313 | 3'-5' DNA 2/2529    | 14/23049  | 0.464508 | 0.664684 | 0.640577 | Blm/Fbxo1       |
| GO_MF_mf:GO:004512 | bioactive liq2/2529 | 14/23049  | 0.464508 | 0.664684 | 0.640577 | Gpr174/S1pr     |
| GO_MF_mf:GO:004523 | CXCR chen2/2529     | 14/23049  | 0.464508 | 0.664684 | 0.640577 | Cxcl10/Ppkl     |
| GO_MF_mf:GO:004801 | receptor ar2/2529   | 14/23049  | 0.464508 | 0.664684 | 0.640577 | Il18bp/Il1rr1   |
| GO_MF_mf:GO:007040 | NAD+ binc2/2529     | 14/23049  | 0.464508 | 0.664684 | 0.640577 | Aldh1a3/Sirt1   |

|                    |              |         |           |          |          |          |             |
|--------------------|--------------|---------|-----------|----------|----------|----------|-------------|
| GO_MF_mf:GO:007070 | BMP recep    | 2/2529  | 14/23049  | 0.464508 | 0.664684 | 0.640577 | Bmp3/Pyca   |
| GO_MF_mf:GO:000417 | endopeptic   | 49/2529 | 438/23049 | 0.465186 | 0.665213 | 0.641087 | Adam2/Ad    |
| GO_MF_mf:GO:001687 | ligase activ | 20/2529 | 176/23049 | 0.469392 | 0.669017 | 0.644753 | Acsl1/Acsr  |
| GO_MF_mf:GO:001510 | organic cat  | 3/2529  | 23/23049  | 0.470019 | 0.669017 | 0.644753 | Slc22a1/Slc |
| GO_MF_mf:GO:001640 | CoA-ligase   | 3/2529  | 23/23049  | 0.470019 | 0.669017 | 0.644753 | Acsl1/Acsr  |
| GO_MF_mf:GO:001692 | ligand-dep   | 3/2529  | 23/23049  | 0.470019 | 0.669017 | 0.644753 | Ppargc1a/S  |
| GO_MF_mf:GO:003145 | nucleosom    | 3/2529  | 23/23049  | 0.470019 | 0.669017 | 0.644753 | Cenpa/H2a   |
| GO_MF_mf:GO:004761 | acyl-CoA h   | 3/2529  | 23/23049  | 0.470019 | 0.669017 | 0.644753 | Acot1/Acoi  |
| GO_MF_mf:GO:007183 | HMG box c    | 3/2529  | 23/23049  | 0.470019 | 0.669017 | 0.644753 | Hoxa3/Pax   |
| GO_MF_mf:GO:001689 | endonucle    | 4/2529  | 32/23049  | 0.47219  | 0.67062  | 0.646298 | Elac1/Fen1  |
| GO_MF_mf:GO:004476 | ATPase act   | 4/2529  | 32/23049  | 0.47219  | 0.67062  | 0.646298 | Atp5a1/Atf  |
| GO_MF_mf:GO:003645 | thiol-depe   | 11/2529 | 95/23049  | 0.472902 | 0.67062  | 0.646298 | Eif3f/Mindy |
| GO_MF_mf:GO:010100 | ubiquitinyl  | 11/2529 | 95/23049  | 0.472902 | 0.67062  | 0.646298 | Eif3f/Mindy |
| GO_MF_mf:GO:009896 | postsynapt   | 5/2529  | 41/23049  | 0.473166 | 0.67062  | 0.646298 | Chrne/Chrr  |
| GO_MF_mf:GO:000525 | anion chan   | 10/2529 | 86/23049  | 0.473205 | 0.67062  | 0.646298 | Ano1/Ano2   |
| GO_MF_mf:GO:001687 | ligase activ | 6/2529  | 50/23049  | 0.473584 | 0.67062  | 0.646298 | Adss/Gclm   |
| GO_MF_mf:GO:003029 | protein kin  | 8/2529  | 68/23049  | 0.473635 | 0.67062  | 0.646298 | Abi1/Cdkn   |
| GO_MF_mf:GO:002280 | active trans | 42/2529 | 376/23049 | 0.475451 | 0.672749 | 0.648349 | Abca12/Ab   |
| GO_MF_mf:GO:000531 | lipid transp | 14/2529 | 123/23049 | 0.484537 | 0.674619 | 0.650151 | Abca12/Ab   |
| GO_MF_mf:GO:000856 | protein tra  | 9/2529  | 78/23049  | 0.489444 | 0.674619 | 0.650151 | Calcr/Ipo1  |
| GO_MF_mf:GO:000554 | calcium-de   | 6/2529  | 51/23049  | 0.493399 | 0.674619 | 0.650151 | Anxa2/Anx   |
| GO_MF_mf:GO:003014 | manganese    | 6/2529  | 51/23049  | 0.493399 | 0.674619 | 0.650151 | Abl2/Abo1   |
| GO_MF_mf:GO:004228 | MHC prote    | 4/2529  | 33/23049  | 0.49692  | 0.674619 | 0.650151 | Atp5a1/Bc   |
| GO_MF_mf:GO:005139 | alpha-acti   | 4/2529  | 33/23049  | 0.49692  | 0.674619 | 0.650151 | Lrrc10/Myr  |
| GO_MF_mf:GO:001629 | lipase activ | 14/2529 | 124/23049 | 0.497195 | 0.674619 | 0.650151 | Abhd1/Adc   |
| GO_MF_mf:GO:000184 | compleme     | 3/2529  | 24/23049  | 0.499146 | 0.674619 | 0.650151 | Cd93/Ilgan  |
| GO_MF_mf:GO:000412 | cytochrom    | 3/2529  | 24/23049  | 0.499146 | 0.674619 | 0.650151 | Cox15/Cox   |
| GO_MF_mf:GO:000511 | Notch binc   | 3/2529  | 24/23049  | 0.499146 | 0.674619 | 0.650151 | Dll4/Jag1   |
| GO_MF_mf:GO:001500 | heme-cop     | 3/2529  | 24/23049  | 0.499146 | 0.674619 | 0.650151 | Cox15/Cox   |
| GO_MF_mf:GO:001667 | oxidoreduc   | 3/2529  | 24/23049  | 0.499146 | 0.674619 | 0.650151 | Cox15/Cox   |
| GO_MF_mf:GO:003166 | G-protein    | 13/2529 | 24/23049  | 0.499146 | 0.674619 | 0.650151 | Adcy4/Adc   |
| GO_MF_mf:GO:005286 | phosphatic   | 3/2529  | 24/23049  | 0.499146 | 0.674619 | 0.650151 | Ptpmt1/Sy   |
| GO_MF_mf:GO:000522 | intracellu   | 2/2529  | 15/23049  | 0.501722 | 0.674619 | 0.650151 | Ano1/Ano2   |
| GO_MF_mf:GO:001517 | acidic amin  | 2/2529  | 15/23049  | 0.501722 | 0.674619 | 0.650151 | Slc1a7/Slc  |
| GO_MF_mf:GO:001641 | acylglycerc  | 2/2529  | 15/23049  | 0.501722 | 0.674619 | 0.650151 | Agpat2/Dg   |
| GO_MF_mf:GO:001659 | glycine bin  | 2/2529  | 15/23049  | 0.501722 | 0.674619 | 0.650151 | Gldc/Grin2  |
| GO_MF_mf:GO:001666 | oxidoreduc   | 2/2529  | 15/23049  | 0.501722 | 0.674619 | 0.650151 | Selenot/Tx  |
| GO_MF_mf:GO:002282 | potassium    | 2/2529  | 15/23049  | 0.501722 | 0.674619 | 0.650151 | Slc9a1/Slc  |
| GO_MF_mf:GO:003015 | receptor si  | 2/2529  | 15/23049  | 0.501722 | 0.674619 | 0.650151 | Ldlrap1/Rg  |
| GO_MF_mf:GO:003423 | protein kin  | 2/2529  | 15/23049  | 0.501722 | 0.674619 | 0.650151 | Ezr/Prkar2  |
| GO_MF_mf:GO:004693 | proton-tra   | 2/2529  | 15/23049  | 0.501722 | 0.674619 | 0.650151 | Atp5a1/Atf  |
| GO_MF_mf:GO:006177 | intracellu   | 2/2529  | 15/23049  | 0.501722 | 0.674619 | 0.650151 | Ano1/Ano2   |
| GO_MF_mf:GO:000166 | alpha-N-a    | 1/2529  | 6/23049   | 0.502129 | 0.674619 | 0.650151 | St6galnac1  |
| GO_MF_mf:GO:000390 | DNA ligase   | 1/2529  | 6/23049   | 0.502129 | 0.674619 | 0.650151 | Lig3        |
| GO_MF_mf:GO:000391 | DNA ligase   | 1/2529  | 6/23049   | 0.502129 | 0.674619 | 0.650151 | Lig3        |
| GO_MF_mf:GO:000403 | alkaline ph  | 1/2529  | 6/23049   | 0.502129 | 0.674619 | 0.650151 | Alpl        |
| GO_MF_mf:GO:000412 | cytochrom    | 1/2529  | 6/23049   | 0.502129 | 0.674619 | 0.650151 | Por         |
| GO_MF_mf:GO:000430 | epoxide hy   | 1/2529  | 6/23049   | 0.502129 | 0.674619 | 0.650151 | Ephx2       |

|                                       |         |          |          |          |         |
|---------------------------------------|---------|----------|----------|----------|---------|
| GO_MF_mf:GO:000432 fatty-acyl-1/2529  | 6/23049 | 0.502129 | 0.674619 | 0.650151 | Acsm5   |
| GO_MF_mf:GO:000445 lactate deh1/2529  | 6/23049 | 0.502129 | 0.674619 | 0.650151 | Ldha    |
| GO_MF_mf:GO:000446 lysine N-ac1/2529  | 6/23049 | 0.502129 | 0.674619 | 0.650151 | Kat2b   |
| GO_MF_mf:GO:000452 phosphodi1/2529    | 6/23049 | 0.502129 | 0.674619 | 0.650151 | Enpp2   |
| GO_MF_mf:GO:000456 beta-galac1/2529   | 6/23049 | 0.502129 | 0.674619 | 0.650151 | Glb1l   |
| GO_MF_mf:GO:000469 cyclic nucle1/2529 | 6/23049 | 0.502129 | 0.674619 | 0.650151 | Prkacb  |
| GO_MF_mf:GO:000470 G-protein 1/2529   | 6/23049 | 0.502129 | 0.674619 | 0.650151 | Grk4    |
| GO_MF_mf:GO:000471 ribosomal 1/2529   | 6/23049 | 0.502129 | 0.674619 | 0.650151 | Rps6kb1 |
| GO_MF_mf:GO:000473 pyruvate d1/2529   | 6/23049 | 0.502129 | 0.674619 | 0.650151 | Pdhb    |
| GO_MF_mf:GO:000493 alpha-adre1/2529   | 6/23049 | 0.502129 | 0.674619 | 0.650151 | Adra1d  |
| GO_MF_mf:GO:000516 neurotropt1/2529   | 6/23049 | 0.502129 | 0.674619 | 0.650151 | Ntf5    |
| GO_MF_mf:GO:000532 long-chain1/2529   | 6/23049 | 0.502129 | 0.674619 | 0.650151 | Abcd3   |
| GO_MF_mf:GO:000532 dopamine 1/2529    | 6/23049 | 0.502129 | 0.674619 | 0.650151 | Slc22a1 |
| GO_MF_mf:GO:000831 protein pre1/2529  | 6/23049 | 0.502129 | 0.674619 | 0.650151 | Fnta    |
| GO_MF_mf:GO:000860 cAMP-dep1/2529     | 6/23049 | 0.502129 | 0.674619 | 0.650151 | Prkar2b |
| GO_MF_mf:GO:001509 ferrous iron1/2529 | 6/23049 | 0.502129 | 0.674619 | 0.650151 | Slc40a1 |
| GO_MF_mf:GO:001523 heme trans1/2529   | 6/23049 | 0.502129 | 0.674619 | 0.650151 | Slc46a1 |
| GO_MF_mf:GO:001528 porin activi1/2529 | 6/23049 | 0.502129 | 0.674619 | 0.650151 | Vdac1   |
| GO_MF_mf:GO:001545 P-P-bond-1/2529    | 6/23049 | 0.502129 | 0.674619 | 0.650151 | Timm17b |
| GO_MF_mf:GO:001556 efflux trans1/2529 | 6/23049 | 0.502129 | 0.674619 | 0.650151 | Abcb5   |
| GO_MF_mf:GO:001661 malate deh1/2529   | 6/23049 | 0.502129 | 0.674619 | 0.650151 | Me3     |
| GO_MF_mf:GO:001980 polyamine 1/2529   | 6/23049 | 0.502129 | 0.674619 | 0.650151 | Sat1    |
| GO_MF_mf:GO:001986 IgE binding1/2529  | 6/23049 | 0.502129 | 0.674619 | 0.650151 | Ms4a2   |
| GO_MF_mf:GO:002302 MHC class 1/2529   | 6/23049 | 0.502129 | 0.674619 | 0.650151 | H2-DMb2 |
| GO_MF_mf:GO:003036 interleukin 1/2529 | 6/23049 | 0.502129 | 0.674619 | 0.650151 | Il27ra  |
| GO_MF_mf:GO:003037 thyroid hor1/2529  | 6/23049 | 0.502129 | 0.674619 | 0.650151 | Sra1    |
| GO_MF_mf:GO:003174 D2 dopami1/2529    | 6/23049 | 0.502129 | 0.674619 | 0.650151 | Grin2b  |
| GO_MF_mf:GO:003180 type 5 met1/2529   | 6/23049 | 0.502129 | 0.674619 | 0.650151 | Dnm3    |
| GO_MF_mf:GO:003202 myosin lig1/2529   | 6/23049 | 0.502129 | 0.674619 | 0.650151 | Mylk2   |
| GO_MF_mf:GO:003451 U3 snoRNA1/2529    | 6/23049 | 0.502129 | 0.674619 | 0.650151 | Bms1    |
| GO_MF_mf:GO:003458 piRNA binc1/2529   | 6/23049 | 0.502129 | 0.674619 | 0.650151 | Tex19.2 |
| GO_MF_mf:GO:003460 pyruvate d1/2529   | 6/23049 | 0.502129 | 0.674619 | 0.650151 | Pdhb    |
| GO_MF_mf:GO:003460 pyruvate d1/2529   | 6/23049 | 0.502129 | 0.674619 | 0.650151 | Pdhb    |
| GO_MF_mf:GO:003547 lipase bind1/2529  | 6/23049 | 0.502129 | 0.674619 | 0.650151 | Plin5   |
| GO_MF_mf:GO:003806 collagen re1/2529  | 6/23049 | 0.502129 | 0.674619 | 0.650151 | Oscar   |
| GO_MF_mf:GO:003808 vascular en1/2529  | 6/23049 | 0.502129 | 0.674619 | 0.650151 | Pdgfra  |
| GO_MF_mf:GO:004295 lipoprotein1/2529  | 6/23049 | 0.502129 | 0.674619 | 0.650151 | Mia3    |
| GO_MF_mf:GO:004297 ornithine d1/2529  | 6/23049 | 0.502129 | 0.674619 | 0.650151 | Oaz1    |
| GO_MF_mf:GO:004351 kinetochor1/2529   | 6/23049 | 0.502129 | 0.674619 | 0.650151 | Ttk     |
| GO_MF_mf:GO:004703 testosteron1/2529  | 6/23049 | 0.502129 | 0.674619 | 0.650151 | Hsd17b3 |
| GO_MF_mf:GO:004739 alkylglycer1/2529  | 6/23049 | 0.502129 | 0.674619 | 0.650151 | Enpp2   |
| GO_MF_mf:GO:004749 calcium-in1/2529   | 6/23049 | 0.502129 | 0.674619 | 0.650151 | Prdx6   |
| GO_MF_mf:GO:004770 bile-salt su1/2529 | 6/23049 | 0.502129 | 0.674619 | 0.650151 | Sult2a5 |
| GO_MF_mf:GO:004776 butyrate-C1/2529   | 6/23049 | 0.502129 | 0.674619 | 0.650151 | Acsm5   |
| GO_MF_mf:GO:004803 ubiquinone1/2529   | 6/23049 | 0.502129 | 0.674619 | 0.650151 | Coq10b  |
| GO_MF_mf:GO:005073 RS domain1/2529    | 6/23049 | 0.502129 | 0.674619 | 0.650151 | Sarnp   |
| GO_MF_mf:GO:005157 5'-deoxyri1/2529   | 6/23049 | 0.502129 | 0.674619 | 0.650151 | Poll    |
| GO_MF_mf:GO:006162 RNA polym1/2529    | 6/23049 | 0.502129 | 0.674619 | 0.650151 | Ankrd1  |

|                    |              |          |           |          |          |          |             |
|--------------------|--------------|----------|-----------|----------|----------|----------|-------------|
| GO_MF_mf:GO:007018 | large ribos  | 1/2529   | 6/23049   | 0.502129 | 0.674619 | 0.650151 | Rpl23       |
| GO_MF_mf:GO:190313 | cuprous ion  | 1/2529   | 6/23049   | 0.502129 | 0.674619 | 0.650151 | Snca        |
| GO_MF_mf:GO:199005 | phosphatic   | 1/2529   | 6/23049   | 0.502129 | 0.674619 | 0.650151 | Pltp        |
| GO_MF_mf:GO:000809 | DNA-depe     | 9/2529   | 79/23049  | 0.505304 | 0.677616 | 0.65304  | Blm/Cdk7/   |
| GO_MF_mf:GO:001920 | phosphata    | 9/2529   | 79/23049  | 0.505304 | 0.677616 | 0.65304  | 2810408A1   |
| GO_MF_mf:GO:004633 | SMAD binc    | 9/2529   | 79/23049  | 0.505304 | 0.677616 | 0.65304  | Ankrd1/Fo   |
| GO_MF_mf:GO:000508 | Rho guany    | 8/2529   | 70/23049  | 0.507491 | 0.680127 | 0.65546  | Arhgef18//  |
| GO_MF_mf:GO:000802 | protein C-t  | 26/2529  | 235/23049 | 0.513129 | 0.687255 | 0.66233  | Arl6ip5/Ca  |
| GO_MF_mf:GO:001545 | potassium    | 5/2529   | 43/23049  | 0.516553 | 0.690982 | 0.665921 | Cav1/Cav3.  |
| GO_MF_mf:GO:004280 | actinin binc | 5/2529   | 43/23049  | 0.516553 | 0.690982 | 0.665921 | Lrrc10/Myr  |
| GO_MF_mf:GO:000372 | single-strai | 10/2529  | 89/23049  | 0.518263 | 0.692839 | 0.667711 | Ddx60/Dhx   |
| GO_MF_mf:GO:000837 | galactosylti | 4/2529   | 34/23049  | 0.521139 | 0.695821 | 0.670584 | Abo/B3gnt   |
| GO_MF_mf:GO:003503 | histone ac   | 4/2529   | 34/23049  | 0.521139 | 0.695821 | 0.670584 | Bcas3/Kans  |
| GO_MF_mf:GO:001659 | amino acid   | 8/2529   | 71/23049  | 0.524159 | 0.698987 | 0.673636 | Dpys/Gldc/  |
| GO_MF_mf:GO:004830 | calcium-de   | 8/2529   | 71/23049  | 0.524159 | 0.698987 | 0.673636 | Anxa2/Anx   |
| GO_MF_mf:GO:000167 | ATPase act   | 3/2529   | 25/23049  | 0.527434 | 0.701617 | 0.676171 | Ahsa2/Atp:  |
| GO_MF_mf:GO:003517 | histone ser  | 3/2529   | 25/23049  | 0.527434 | 0.701617 | 0.676171 | Gm14147//   |
| GO_MF_mf:GO:007062 | proteasom    | 3/2529   | 25/23049  | 0.527434 | 0.701617 | 0.676171 | Psme4/Psn   |
| GO_MF_mf:GO:008002 | phosphatic   | 3/2529   | 25/23049  | 0.527434 | 0.701617 | 0.676171 | Clvs1/Gbf1  |
| GO_MF_mf:GO:000040 | four-way jt  | 2/2529   | 16/23049  | 0.53722  | 0.70938  | 0.683652 | Blm/Men1    |
| GO_MF_mf:GO:001529 | solute:prot  | 2/2529   | 16/23049  | 0.53722  | 0.70938  | 0.683652 | Slc9a1/Slc9 |
| GO_MF_mf:GO:001650 | protein-ho   | 2/2529   | 16/23049  | 0.53722  | 0.70938  | 0.683652 | Adipor2/Lc  |
| GO_MF_mf:GO:001672 | oxidoreduc   | 2/2529   | 16/23049  | 0.53722  | 0.70938  | 0.683652 | Mmachc/M    |
| GO_MF_mf:GO:001716 | Ral GTPase   | 2/2529   | 16/23049  | 0.53722  | 0.70938  | 0.683652 | Rab34/Ralk  |
| GO_MF_mf:GO:002284 | acetylcholi  | 2/2529   | 16/23049  | 0.53722  | 0.70938  | 0.683652 | Chrne/Chrr  |
| GO_MF_mf:GO:003055 | cGMP bind    | 2/2529   | 16/23049  | 0.53722  | 0.70938  | 0.683652 | Cnga2/Pde   |
| GO_MF_mf:GO:007000 | metalloami   | 2/2529   | 16/23049  | 0.53722  | 0.70938  | 0.683652 | Lvrn/Mmp:   |
| GO_MF_mf:GO:007003 | telomerase   | 2/2529   | 16/23049  | 0.53722  | 0.70938  | 0.683652 | Hnrnpc/Nc   |
| GO_MF_mf:GO:007057 | lysine-acet  | 2/2529   | 16/23049  | 0.53722  | 0.70938  | 0.683652 | Mllt3/Psme  |
| GO_MF_mf:GO:007067 | inositol 1,4 | 2/2529   | 16/23049  | 0.53722  | 0.70938  | 0.683652 | Cyth2/Rph:  |
| GO_MF_mf:GO:014003 | acetylation  | 2/2529   | 16/23049  | 0.53722  | 0.70938  | 0.683652 | Mllt3/Psme  |
| GO_MF_mf:GO:000839 | arachidonic  | 4/2529   | 35/23049  | 0.544787 | 0.710807 | 0.685027 | Cyp2b10/C   |
| GO_MF_mf:GO:003526 | ionotropic   | 4/2529   | 35/23049  | 0.544787 | 0.710807 | 0.685027 | Canx/Flot2. |
| GO_MF_mf:GO:005172 | protein ph   | 4/2529   | 35/23049  | 0.544787 | 0.710807 | 0.685027 | Akap6/Ptp:  |
| GO_MF_mf:GO:001687 | acid-thiol   | 1/3/2529 | 26/23049  | 0.554808 | 0.710807 | 0.685027 | Acsl1/Acsn  |
| GO_MF_mf:GO:003245 | histone de   | 3/2529   | 26/23049  | 0.554808 | 0.710807 | 0.685027 | Kdm2b/Kd    |
| GO_MF_mf:GO:005153 | iron, 2 su   | 3/2529   | 26/23049  | 0.554808 | 0.710807 | 0.685027 | Isca2/Nduf  |
| GO_MF_mf:GO:000101 | RNA polym    | 1/2529   | 7/23049   | 0.556771 | 0.710807 | 0.685027 | Maf1        |
| GO_MF_mf:GO:000164 | adenylate    | 1/2529   | 7/23049   | 0.556771 | 0.710807 | 0.685027 | Grm2        |
| GO_MF_mf:GO:000383 | beta-galac   | 1/2529   | 7/23049   | 0.556771 | 0.710807 | 0.685027 | St3gal3     |
| GO_MF_mf:GO:000402 | alcohol sul  | 1/2529   | 7/23049   | 0.556771 | 0.710807 | 0.685027 | Sult2a5     |
| GO_MF_mf:GO:000412 | cytidine de  | 1/2529   | 7/23049   | 0.556771 | 0.710807 | 0.685027 | Apobec1     |
| GO_MF_mf:GO:000471 | signal tran  | 1/2529   | 7/23049   | 0.556771 | 0.710807 | 0.685027 | Erbp3       |
| GO_MF_mf:GO:000490 | interleukin  | 1/2529   | 7/23049   | 0.556771 | 0.710807 | 0.685027 | Il1r1       |
| GO_MF_mf:GO:000493 | extracellula | 1/2529   | 7/23049   | 0.556771 | 0.710807 | 0.685027 | P2rx1       |
| GO_MF_mf:GO:000497 | NMDA glui    | 1/2529   | 7/23049   | 0.556771 | 0.710807 | 0.685027 | Grin2b      |
| GO_MF_mf:GO:000498 | N-formyl p   | 1/2529   | 7/23049   | 0.556771 | 0.710807 | 0.685027 | Fpr2        |
| GO_MF_mf:GO:000500 | vasopressin  | 1/2529   | 7/23049   | 0.556771 | 0.710807 | 0.685027 | Avpr1a      |

|                                                   |           |          |          |          |             |
|---------------------------------------------------|-----------|----------|----------|----------|-------------|
| GO_MF_mf:GO:000502vascular en1/2529               | 7/23049   | 0.556771 | 0.710807 | 0.685027 | Pdgfra      |
| GO_MF_mf:GO:000511patched bil1/2529               | 7/23049   | 0.556771 | 0.710807 | 0.685027 | Smo         |
| GO_MF_mf:GO:000513interleukin-1/2529              | 7/23049   | 0.556771 | 0.710807 | 0.685027 | Pycard      |
| GO_MF_mf:GO:000522intracellular 1/2529            | 7/23049   | 0.556771 | 0.710807 | 0.685027 | Cnga2       |
| GO_MF_mf:GO:000819ferric iron k1/2529             | 7/23049   | 0.556771 | 0.710807 | 0.685027 | Th          |
| GO_MF_mf:GO:000829single-strand1/2529             | 7/23049   | 0.556771 | 0.710807 | 0.685027 | Pole        |
| GO_MF_mf:GO:001034carboxyl-C1/2529                | 7/23049   | 0.556771 | 0.710807 | 0.685027 | Pcmtd1      |
| GO_MF_mf:GO:001518L-alanine t1/2529               | 7/23049   | 0.556771 | 0.710807 | 0.685027 | Slc38a7     |
| GO_MF_mf:GO:001518arginine tra1/2529              | 7/23049   | 0.556771 | 0.710807 | 0.685027 | AU018091    |
| GO_MF_mf:GO:001518L-lysine tra1/2529              | 7/23049   | 0.556771 | 0.710807 | 0.685027 | AU018091    |
| GO_MF_mf:GO:001558C4-dicarboxyl1/2529             | 7/23049   | 0.556771 | 0.710807 | 0.685027 | Slc38a7     |
| GO_MF_mf:GO:001667oxidoreductase1/2529            | 7/23049   | 0.556771 | 0.710807 | 0.685027 | Suox        |
| GO_MF_mf:GO:001671oxidoreductase1/2529            | 7/23049   | 0.556771 | 0.710807 | 0.685027 | Th          |
| GO_MF_mf:GO:001716CDP-alcohol1/2529               | 7/23049   | 0.556771 | 0.710807 | 0.685027 | Tmem269     |
| GO_MF_mf:GO:001717phosphatase1/2529               | 7/23049   | 0.556771 | 0.710807 | 0.685027 | Pigyl       |
| GO_MF_mf:GO:001987sodium channel1/2529            | 7/23049   | 0.556771 | 0.710807 | 0.685027 | Pcsk9       |
| GO_MF_mf:GO:001996interleukin-1/2529              | 7/23049   | 0.556771 | 0.710807 | 0.685027 | Il1rn       |
| GO_MF_mf:GO:002285alanine transferase1/2529       | 7/23049   | 0.556771 | 0.710807 | 0.685027 | Slc38a7     |
| GO_MF_mf:GO:003015molybdenum1/2529                | 7/23049   | 0.556771 | 0.710807 | 0.685027 | Suox        |
| GO_MF_mf:GO:003055acetylcholinesterase1/2529      | 7/23049   | 0.556771 | 0.710807 | 0.685027 | Ly6e        |
| GO_MF_mf:GO:003173CCR5 chemokine1/2529            | 7/23049   | 0.556771 | 0.710807 | 0.685027 | Ccl4        |
| GO_MF_mf:GO:003182G-protein coupled1/2529         | 7/23049   | 0.556771 | 0.710807 | 0.685027 | Gnai1       |
| GO_MF_mf:GO:003279heterotrimeric1/2529            | 7/23049   | 0.556771 | 0.710807 | 0.685027 | Adora1      |
| GO_MF_mf:GO:003525UDP-xylosyltransferase1/2529    | 7/23049   | 0.556771 | 0.710807 | 0.685027 | Xylt1       |
| GO_MF_mf:GO:004260CD4 receptor1/2529              | 7/23049   | 0.556771 | 0.710807 | 0.685027 | Spg21       |
| GO_MF_mf:GO:004697histone methyltransferase1/2529 | 7/23049   | 0.556771 | 0.710807 | 0.685027 | Ezh1        |
| GO_MF_mf:GO:004713protein-disulfide1/2529         | 7/23049   | 0.556771 | 0.710807 | 0.685027 | Txndc8      |
| GO_MF_mf:GO:004825flap endonuclease1/2529         | 7/23049   | 0.556771 | 0.710807 | 0.685027 | Fen1        |
| GO_MF_mf:GO:004827mitogen-activated1/2529         | 7/23049   | 0.556771 | 0.710807 | 0.685027 | Prmt1       |
| GO_MF_mf:GO:005029steroid sulfotransferase1/2529  | 7/23049   | 0.556771 | 0.710807 | 0.685027 | Sult2a5     |
| GO_MF_mf:GO:005188G-quadruplex1/2529              | 7/23049   | 0.556771 | 0.710807 | 0.685027 | Blm         |
| GO_MF_mf:GO:005199protein carboxylase1/2529       | 7/23049   | 0.556771 | 0.710807 | 0.685027 | Pcmtd1      |
| GO_MF_mf:GO:006167importin-alpha1/2529            | 7/23049   | 0.556771 | 0.710807 | 0.685027 | Ei24        |
| GO_MF_mf:GO:007056uridylyltransferase1/2529       | 7/23049   | 0.556771 | 0.710807 | 0.685027 | Ugp2        |
| GO_MF_mf:GO:007125connexin b1/2529                | 7/23049   | 0.556771 | 0.710807 | 0.685027 | Cav3        |
| GO_MF_mf:GO:007234NAADP-se1/2529                  | 7/23049   | 0.556771 | 0.710807 | 0.685027 | Mcoln3      |
| GO_MF_mf:GO:009764calcitonin receptor1/2529       | 7/23049   | 0.556771 | 0.710807 | 0.685027 | Calcr       |
| GO_MF_mf:GO:009863cell-matrix1/2529               | 7/23049   | 0.556771 | 0.710807 | 0.685027 | Madcam1     |
| GO_MF_mf:GO:190147azole transporter1/2529         | 7/23049   | 0.556771 | 0.710807 | 0.685027 | Slc38a7     |
| GO_MF_mf:GO:000481aminoacyl-tRNA synthetase5/2529 | 45/23049  | 0.558361 | 0.711572 | 0.685764 | Kars/Lrrc47 |
| GO_MF_mf:GO:001687ligase activator5/2529          | 45/23049  | 0.558361 | 0.711572 | 0.685764 | Kars/Lrrc47 |
| GO_MF_mf:GO:003281tumor necrosis factor5/2529     | 45/23049  | 0.558361 | 0.711572 | 0.685764 | Babam2/Ccl4 |
| GO_MF_mf:GO:003024carbohydrate29/2529             | 268/23049 | 0.561032 | 0.714554 | 0.688638 | Calr/Canx1  |
| GO_MF_mf:GO:001982cation-transporter7/2529        | 64/23049  | 0.562689 | 0.715395 | 0.689449 | Atp1b2/Atf7 |
| GO_MF_mf:GO:002285active ion transporter7/2529    | 64/23049  | 0.562689 | 0.715395 | 0.689449 | Atp1b2/Atf7 |
| GO_MF_mf:GO:004262ATPase cotransporter7/2529      | 64/23049  | 0.562689 | 0.715395 | 0.689449 | Atp1b2/Atf7 |
| GO_MF_mf:GO:000808phosphoric acid9/2529           | 83/23049  | 0.567052 | 0.720092 | 0.693976 | Adora1/Cc   |
| GO_MF_mf:GO:005066flavin adenine9/2529            | 83/23049  | 0.567052 | 0.720092 | 0.693976 | Acad11/Aif  |

|                                         |           |          |          |          |             |
|-----------------------------------------|-----------|----------|----------|----------|-------------|
| GO_MF_mf:GO:000388 DNA-direc 4/2529     | 36/23049  | 0.567815 | 0.720637 | 0.694501 | Polr2f/Polr |
| GO_MF_mf:GO:000443 phosphatic 2/2529    | 17/23049  | 0.57093  | 0.721214 | 0.695057 | Ccr1/Plch1  |
| GO_MF_mf:GO:000462 lysophosph 2/2529    | 17/23049  | 0.57093  | 0.721214 | 0.695057 | Enpp2/Pnc   |
| GO_MF_mf:GO:000493 adrenergic 2/2529    | 17/23049  | 0.57093  | 0.721214 | 0.695057 | Adra1d/Olf  |
| GO_MF_mf:GO:000495 icosanoid r 2/2529   | 17/23049  | 0.57093  | 0.721214 | 0.695057 | Cysltr2/Ltb |
| GO_MF_mf:GO:001688 acid-aminc 2/2529    | 17/23049  | 0.57093  | 0.721214 | 0.695057 | Gclm/Tpgs   |
| GO_MF_mf:GO:002288 macromole 2/2529     | 17/23049  | 0.57093  | 0.721214 | 0.695057 | Timm17b/    |
| GO_MF_mf:GO:003027 LRR domai 2/2529     | 17/23049  | 0.57093  | 0.721214 | 0.695057 | Mkl1/Ncar   |
| GO_MF_mf:GO:000110 RNA polyn 11/2529    | 102/23049 | 0.571282 | 0.721214 | 0.695057 | Ankrd1/Hd   |
| GO_MF_mf:GO:190293 phosphatic 11/2529   | 102/23049 | 0.571282 | 0.721214 | 0.695057 | Anxa2/Cfl1  |
| GO_MF_mf:GO:000525 chloride ch 8/2529   | 74/23049  | 0.572842 | 0.722761 | 0.696548 | Ano1/Ano2   |
| GO_MF_mf:GO:006113 peptidase r 26/2529  | 242/23049 | 0.576234 | 0.726615 | 0.700262 | Acrbp/Cav   |
| GO_MF_mf:GO:000837 acetylgalac 5/2529   | 46/23049  | 0.578573 | 0.728454 | 0.702034 | Abo/B3gnt   |
| GO_MF_mf:GO:004802 CCR chem 5/2529      | 46/23049  | 0.578573 | 0.728454 | 0.702034 | Ccl20/Ccl2  |
| GO_MF_mf:GO:006163 ubiquitin p 25/2529  | 233/23049 | 0.578707 | 0.728454 | 0.702034 | Arih2/Asb1  |
| GO_MF_mf:GO:000806 glutamate 3/2529     | 27/23049  | 0.58121  | 0.729593 | 0.703132 | Gria1/Grin2 |
| GO_MF_mf:GO:000813 NADH deh 3/2529      | 27/23049  | 0.58121  | 0.729593 | 0.703132 | Ndufa12/N   |
| GO_MF_mf:GO:005013 NADH deh 3/2529      | 27/23049  | 0.58121  | 0.729593 | 0.703132 | Ndufa12/N   |
| GO_MF_mf:GO:007188 14-3-3 prc 3/2529    | 27/23049  | 0.58121  | 0.729593 | 0.703132 | Nek1/SrpK   |
| GO_MF_mf:GO:001717 serine hydr 24/2529  | 224/23049 | 0.581304 | 0.729593 | 0.703132 | Ache/Apeh   |
| GO_MF_mf:GO:000122 transcriptic 46/2529 | 428/23049 | 0.582938 | 0.731218 | 0.704698 | Arid3c/Arn  |
| GO_MF_mf:GO:003506 methylatec 6/2529    | 56/23049  | 0.587939 | 0.736604 | 0.709889 | Fmr1/Glyr1  |
| GO_MF_mf:GO:014003 methylatio 6/2529    | 56/23049  | 0.587939 | 0.736604 | 0.709889 | Fmr1/Glyr1  |
| GO_MF_mf:GO:001920 kinase acti 8/2529   | 75/23049  | 0.588561 | 0.736604 | 0.709889 | Abi1/Cdkn   |
| GO_MF_mf:GO:003162 ubiquitin c 4/2529   | 37/23049  | 0.59018  | 0.736604 | 0.709889 | Arih2/Lonr  |
| GO_MF_mf:GO:003406 5'-3' RNA 4/2529     | 37/23049  | 0.59018  | 0.736604 | 0.709889 | Polr2f/Polr |
| GO_MF_mf:GO:004216 SH2 domai 4/2529     | 37/23049  | 0.59018  | 0.736604 | 0.709889 | Ms4a2/Sit1  |
| GO_MF_mf:GO:009774 RNA polyn 4/2529     | 37/23049  | 0.59018  | 0.736604 | 0.709889 | Polr2f/Polr |
| GO_MF_mf:GO:000802 ATP-deper 10/2529    | 94/23049  | 0.590309 | 0.736604 | 0.709889 | Blm/Ddx19   |
| GO_MF_mf:GO:007003 purine NTF 10/2529   | 94/23049  | 0.590309 | 0.736604 | 0.709889 | Blm/Ddx19   |
| GO_MF_mf:GO:000471 non-memk 7/2529      | 66/23049  | 0.596332 | 0.736689 | 0.709971 | Abl2/Eif2ak |
| GO_MF_mf:GO:001990 protein ph 16/2529   | 151/23049 | 0.597704 | 0.736689 | 0.709971 | Akap6/Atp   |
| GO_MF_mf:GO:000122 transcriptic 5/2529  | 47/23049  | 0.598282 | 0.736689 | 0.709971 | Foxc1/Hda   |
| GO_MF_mf:GO:000818 neuropepti 5/2529    | 47/23049  | 0.598282 | 0.736689 | 0.709971 | Cysltr2/Gal |
| GO_MF_mf:GO:001510 inorganic a 15/2529  | 142/23049 | 0.602032 | 0.736689 | 0.709971 | Ank/Ano1/   |
| GO_MF_mf:GO:000474 retinol deh 2/2529   | 18/23049  | 0.602817 | 0.736689 | 0.709971 | Adh1/Dhrs   |
| GO_MF_mf:GO:000523 extracellula 2/2529  | 18/23049  | 0.602817 | 0.736689 | 0.709971 | Gria1/Grin2 |
| GO_MF_mf:GO:001592 hexosamin 2/2529     | 18/23049  | 0.602817 | 0.736689 | 0.709971 | Hyal2/Hyal  |
| GO_MF_mf:GO:007018 DNA polyn 2/2529     | 18/23049  | 0.602817 | 0.736689 | 0.709971 | Nabp2/Pcr   |
| GO_MF_mf:GO:001529 antiporter 8/2529    | 76/23049  | 0.603996 | 0.736689 | 0.709971 | Clcn4/Slc22 |
| GO_MF_mf:GO:001507 proton trar 12/2529  | 114/23049 | 0.605176 | 0.736689 | 0.709971 | Atp5a1/Atp  |
| GO_MF_mf:GO:000099 transcriptic 1/2529  | 8/23049   | 0.605418 | 0.736689 | 0.709971 | Gtf3c3      |
| GO_MF_mf:GO:000443 N,N-dimet 1/2529     | 8/23049   | 0.605418 | 0.736689 | 0.709971 | Fmo2        |
| GO_MF_mf:GO:000457 mannosyl- 1/2529     | 8/23049   | 0.605418 | 0.736689 | 0.709971 | Man1b1      |
| GO_MF_mf:GO:000486 cAMP-dep 1/2529      | 8/23049   | 0.605418 | 0.736689 | 0.709971 | Prkar2b     |
| GO_MF_mf:GO:000541 glucose:sor 1/2529   | 8/23049   | 0.605418 | 0.736689 | 0.709971 | Slc5a4a     |
| GO_MF_mf:GO:000802 G-protein 1/2529     | 8/23049   | 0.605418 | 0.736689 | 0.709971 | Opn4        |
| GO_MF_mf:GO:000852 phosphatic 1/2529    | 8/23049   | 0.605418 | 0.736689 | 0.709971 | Pitpnm2     |



|                                                        |           |          |          |          |             |
|--------------------------------------------------------|-----------|----------|----------|----------|-------------|
| GO_MF_m:GO:001515L-proline t1/2529                     | 8/23049   | 0.605418 | 0.736689 | 0.709971 | Slc6a20a    |
| GO_MF_m:GO:001592galactosidase1/2529                   | 8/23049   | 0.605418 | 0.736689 | 0.709971 | Glb1l       |
| GO_MF_m:GO:001617superoxide1/2529                      | 8/23049   | 0.605418 | 0.736689 | 0.709971 | Sh3pxd2a    |
| GO_MF_m:GO:001641O-acetyltransferase1/2529             | 8/23049   | 0.605418 | 0.736689 | 0.709971 | Lpcat4      |
| GO_MF_m:GO:001645C-X-C chemokine1/2529                 | 8/23049   | 0.605418 | 0.736689 | 0.709971 | Cxcr5       |
| GO_MF_m:GO:001666oxidoreductase1/2529                  | 8/23049   | 0.605418 | 0.736689 | 0.709971 | Gphn        |
| GO_MF_m:GO:001674hydroxymethyltransferase1/2529        | 8/23049   | 0.605418 | 0.736689 | 0.709971 | Shmt1       |
| GO_MF_m:GO:001985calcium channel1/2529                 | 8/23049   | 0.605418 | 0.736689 | 0.709971 | Fkbp1b      |
| GO_MF_m:GO:003023nitric-oxide synthase1/2529           | 8/23049   | 0.605418 | 0.736689 | 0.709971 | Atp2b4      |
| GO_MF_m:GO:003030ADP-ribosyltransferase1/2529          | 8/23049   | 0.605418 | 0.736689 | 0.709971 | Adcyap1r1   |
| GO_MF_m:GO:003045hemoglobin1/2529                      | 8/23049   | 0.605418 | 0.736689 | 0.709971 | Hbb-bs      |
| GO_MF_m:GO:003062pre-mRNA1/2529                        | 8/23049   | 0.605418 | 0.736689 | 0.709971 | Zrsr2       |
| GO_MF_m:GO:003165beta-2 adrenergic receptor1/2529      | 8/23049   | 0.605418 | 0.736689 | 0.709971 | Gria1       |
| GO_MF_m:GO:003195medium-chain fatty acid1/2529         | 8/23049   | 0.605418 | 0.736689 | 0.709971 | Acs1        |
| GO_MF_m:GO:003538ATP-gated ion channel1/2529           | 8/23049   | 0.605418 | 0.736689 | 0.709971 | P2rx1       |
| GO_MF_m:GO:003631annealing factor1/2529                | 8/23049   | 0.605418 | 0.736689 | 0.709971 | Blm         |
| GO_MF_m:GO:003803sphingosine1/2529                     | 8/23049   | 0.605418 | 0.736689 | 0.709971 | S1pr5       |
| GO_MF_m:GO:004280vitamin D receptor1/2529              | 8/23049   | 0.605418 | 0.736689 | 0.709971 | Taf11       |
| GO_MF_m:GO:004314ATP-dependent protease1/2529          | 8/23049   | 0.605418 | 0.736689 | 0.709971 | Blm         |
| GO_MF_m:GO:005064testosterone1/2529                    | 8/23049   | 0.605418 | 0.736689 | 0.709971 | Cyp3a11     |
| GO_MF_m:GO:005078RAGE receptor1/2529                   | 8/23049   | 0.605418 | 0.736689 | 0.709971 | Fpr2        |
| GO_MF_m:GO:005137epinephrine1/2529                     | 8/23049   | 0.605418 | 0.736689 | 0.709971 | Rnls        |
| GO_MF_m:GO:007005delta-catenin1/2529                   | 8/23049   | 0.605418 | 0.736689 | 0.709971 | Ptpnj       |
| GO_MF_m:GO:007056cytidylyltransferase1/2529            | 8/23049   | 0.605418 | 0.736689 | 0.709971 | Pcyt2       |
| GO_MF_m:GO:010235decanoate1/2529                       | 8/23049   | 0.605418 | 0.736689 | 0.709971 | Acs1        |
| GO_MF_m:GO:199045transferrin1/2529                     | 8/23049   | 0.605418 | 0.736689 | 0.709971 | Snx2        |
| GO_MF_m:GO:001545cation:calcium3/2529                  | 28/23049  | 0.606596 | 0.737289 | 0.710549 | Slc22a5/Slc |
| GO_MF_m:GO:009960ligand-gated ion channel3/2529        | 28/23049  | 0.606596 | 0.737289 | 0.710549 | Grin2b/Jph  |
| GO_MF_m:GO:004205chemoattractant4/2529                 | 38/23049  | 0.611847 | 0.742416 | 0.71549  | Defb4/Fgf7  |
| GO_MF_m:GO:006055ATPase regulator4/2529                | 38/23049  | 0.611847 | 0.742416 | 0.71549  | Ahsa2/Atp   |
| GO_MF_m:GO:190431transmitter4/2529                     | 38/23049  | 0.611847 | 0.742416 | 0.71549  | Chrne/Chrr  |
| GO_MF_m:GO:000098RNA polymerase7/2529                  | 67/23049  | 0.612646 | 0.742549 | 0.715618 | Arx/Esrrb/H |
| GO_MF_m:GO:003027clathrin bin7/2529                    | 67/23049  | 0.612646 | 0.742549 | 0.715618 | Dnajc6/Ldl  |
| GO_MF_m:GO:006165ubiquitin-like25/2529                 | 237/23049 | 0.614034 | 0.743814 | 0.716837 | Arih2/Asb1  |
| GO_MF_m:GO:000110RNA polymerase5/2529                  | 48/23049  | 0.61746  | 0.746581 | 0.719504 | Ankrd1/Hy   |
| GO_MF_m:GO:000178phosphatase5/2529                     | 48/23049  | 0.61746  | 0.746581 | 0.719504 | Cpne6/Gsc   |
| GO_MF_m:GO:000523excitatory ion channel5/2529          | 48/23049  | 0.61746  | 0.746581 | 0.719504 | Chrne/Chrr  |
| GO_MF_m:GO:001990syntaxin bin10/2529                   | 96/23049  | 0.617705 | 0.746581 | 0.719504 | Cav1/Dapk   |
| GO_MF_m:GO:003361activating transcription factor8/2529 | 77/23049  | 0.619131 | 0.747885 | 0.720761 | Dgkq/Exos   |
| GO_MF_m:GO:000823serine-type23/2529                    | 219/23049 | 0.62061  | 0.749252 | 0.722078 | Apeh/C1rl/  |
| GO_MF_m:GO:001510chloride channel9/2529                | 87/23049  | 0.625248 | 0.754429 | 0.727067 | Ano1/Ano2   |
| GO_MF_m:GO:000372RNA helicase7/2529                    | 68/23049  | 0.628598 | 0.756013 | 0.728594 | Ddx19b/Dc   |
| GO_MF_m:GO:000400ATP-dependent protease7/2529          | 68/23049  | 0.628598 | 0.756013 | 0.728594 | Ddx19b/Dc   |
| GO_MF_m:GO:001702myosin bin7/2529                      | 68/23049  | 0.628598 | 0.756013 | 0.728594 | Fxyd1/Gria  |
| GO_MF_m:GO:005068androgen receptor3/2529               | 29/23049  | 0.630934 | 0.756013 | 0.728594 | Calr/Pkn1/I |
| GO_MF_m:GO:000178phosphotyrosine4/2529                 | 39/23049  | 0.632791 | 0.756013 | 0.728594 | Abl2/Ldlra  |
| GO_MF_m:GO:000161virus receptor2/2529                  | 19/23049  | 0.632876 | 0.756013 | 0.728594 | Cldn1/Hyal  |
| GO_MF_m:GO:000374translation2/2529                     | 19/23049  | 0.632876 | 0.756013 | 0.728594 | Abtb1/Gfr   |

|                                        |           |          |          |          |             |
|----------------------------------------|-----------|----------|----------|----------|-------------|
| GO_MF_mf:GO:000419calcium-de2/2529     | 19/23049  | 0.632876 | 0.756013 | 0.728594 | Capn13/Pd   |
| GO_MF_mf:GO:000489GABA-A re2/2529      | 19/23049  | 0.632876 | 0.756013 | 0.728594 | Gabra6/Ga   |
| GO_MF_mf:GO:000497ionotropic 2/2529    | 19/23049  | 0.632876 | 0.756013 | 0.728594 | Gria1/Grin2 |
| GO_MF_mf:GO:000508ARF guany 2/2529     | 19/23049  | 0.632876 | 0.756013 | 0.728594 | Cyth2/Gbf1  |
| GO_MF_mf:GO:001564fatty acid li 2/2529 | 19/23049  | 0.632876 | 0.756013 | 0.728594 | Acs1/Acsr   |
| GO_MF_mf:GO:001678phosphotr2/2529      | 19/23049  | 0.632876 | 0.756013 | 0.728594 | Tmem269/    |
| GO_MF_mf:GO:001982oxygen bin2/2529     | 19/23049  | 0.632876 | 0.756013 | 0.728594 | Hbb-bs/Th   |
| GO_MF_mf:GO:004696proton-tra2/2529     | 19/23049  | 0.632876 | 0.756013 | 0.728594 | Atp6v0c/Tc  |
| GO_MF_mf:GO:005043transformir2/2529    | 19/23049  | 0.632876 | 0.756013 | 0.728594 | Cd36/Hyal   |
| GO_MF_mf:GO:005274inositol ph2/2529    | 19/23049  | 0.632876 | 0.756013 | 0.728594 | Bpnt1/Sec1  |
| GO_MF_mf:GO:010400hijacked m 2/2529    | 19/23049  | 0.632876 | 0.756013 | 0.728594 | Cldn1/Hyal  |
| GO_MF_mf:GO:000455hydrolase 11/2529    | 107/23049 | 0.636573 | 0.760008 | 0.732444 | 1700016DC   |
| GO_MF_mf:GO:000818RNA-depe 7/2529      | 69/23049  | 0.644174 | 0.7602   | 0.732629 | Ddx19b/Dc   |
| GO_MF_mf:GO:003525nuclear ho15/2529    | 146/23049 | 0.645901 | 0.7602   | 0.732629 | Asxl1/Bcas  |
| GO_MF_mf:GO:000001single-strai1/2529   | 9/23049   | 0.648728 | 0.7602   | 0.732629 | Xrcc1       |
| GO_MF_mf:GO:000175retinal deh1/2529    | 9/23049   | 0.648728 | 0.7602   | 0.732629 | Aldh1a3     |
| GO_MF_mf:GO:000215G-quadrup1/2529      | 9/23049   | 0.648728 | 0.7602   | 0.732629 | Fmr1        |
| GO_MF_mf:GO:000368DNA clam1/2529       | 9/23049   | 0.648728 | 0.7602   | 0.732629 | Rfc1        |
| GO_MF_mf:GO:000369double-str1/2529     | 9/23049   | 0.648728 | 0.7602   | 0.732629 | Hmbox1      |
| GO_MF_mf:GO:000372telomerase 1/2529    | 9/23049   | 0.648728 | 0.7602   | 0.732629 | Hmbox1      |
| GO_MF_mf:GO:0003841-acylglyce1/2529    | 9/23049   | 0.648728 | 0.7602   | 0.732629 | Agpat2      |
| GO_MF_mf:GO:000396RNA-direct1/2529     | 9/23049   | 0.648728 | 0.7602   | 0.732629 | Hmbox1      |
| GO_MF_mf:GO:000444inositol-po1/2529    | 9/23049   | 0.648728 | 0.7602   | 0.732629 | Sec16a      |
| GO_MF_mf:GO:000457oligosacchi1/2529    | 9/23049   | 0.648728 | 0.7602   | 0.732629 | Rpn2        |
| GO_MF_mf:GO:000457dolichyl-di1/2529    | 9/23049   | 0.648728 | 0.7602   | 0.732629 | Rpn2        |
| GO_MF_mf:GO:000465polynucleo1/2529     | 9/23049   | 0.648728 | 0.7602   | 0.732629 | Papd7       |
| GO_MF_mf:GO:000516neurotrop1/2529      | 9/23049   | 0.648728 | 0.7602   | 0.732629 | Ntf5        |
| GO_MF_mf:GO:000522intracellula1/2529   | 9/23049   | 0.648728 | 0.7602   | 0.732629 | Cnga2       |
| GO_MF_mf:GO:000522volume-se1/2529      | 9/23049   | 0.648728 | 0.7602   | 0.732629 | Lrrc8b      |
| GO_MF_mf:GO:000538iron ion tra1/2529   | 9/23049   | 0.648728 | 0.7602   | 0.732629 | Slc40a1     |
| GO_MF_mf:GO:000824omega pe1/2529       | 9/23049   | 0.648728 | 0.7602   | 0.732629 | Apeh        |
| GO_MF_mf:GO:0008293'-5'-exod1/2529     | 9/23049   | 0.648728 | 0.7602   | 0.732629 | Pole        |
| GO_MF_mf:GO:001537cation:chlo1/2529    | 9/23049   | 0.648728 | 0.7602   | 0.732629 | Slc12a2     |
| GO_MF_mf:GO:001537potassium:1/2529     | 9/23049   | 0.648728 | 0.7602   | 0.732629 | Slc12a2     |
| GO_MF_mf:GO:001600phospholi1/2529      | 9/23049   | 0.648728 | 0.7602   | 0.732629 | Stx4a       |
| GO_MF_mf:GO:001688ligase activ1/2529   | 9/23049   | 0.648728 | 0.7602   | 0.732629 | Lig3        |
| GO_MF_mf:GO:001976immunoglc1/2529      | 9/23049   | 0.648728 | 0.7602   | 0.732629 | Ms4a2       |
| GO_MF_mf:GO:003143titin bindin1/2529   | 9/23049   | 0.648728 | 0.7602   | 0.732629 | Ankrd1      |
| GO_MF_mf:GO:003235oxidized pt1/2529    | 9/23049   | 0.648728 | 0.7602   | 0.732629 | Blm         |
| GO_MF_mf:GO:003317protein-DN1/2529     | 9/23049   | 0.648728 | 0.7602   | 0.732629 | Rfc1        |
| GO_MF_mf:GO:003445dynactin bi1/2529    | 9/23049   | 0.648728 | 0.7602   | 0.732629 | Snx6        |
| GO_MF_mf:GO:004228xylosyltran1/2529    | 9/23049   | 0.648728 | 0.7602   | 0.732629 | Xylt1       |
| GO_MF_mf:GO:004289antibiotic tr1/2529  | 9/23049   | 0.648728 | 0.7602   | 0.732629 | Slc22a5     |
| GO_MF_mf:GO:004603inositol tris1/2529  | 9/23049   | 0.648728 | 0.7602   | 0.732629 | Sec16a      |
| GO_MF_mf:GO:004702androster1/2529      | 9/23049   | 0.648728 | 0.7602   | 0.732629 | Akr1c12     |
| GO_MF_mf:GO:009898G-protein 1/2529     | 9/23049   | 0.648728 | 0.7602   | 0.732629 | Grm2        |
| GO_MF_mf:GO:000857ATP-deper3/2529      | 30/23049  | 0.654207 | 0.765789 | 0.738015 | Dnaic2/Kif4 |
| GO_MF_mf:GO:001529solute:catic3/2529   | 30/23049  | 0.654207 | 0.765789 | 0.738015 | Slc22a5/Slc |

|                    |              |         |           |          |          |          |             |
|--------------------|--------------|---------|-----------|----------|----------|----------|-------------|
| GO_MF_mf:GO:003525 | glutamate    | 6/2529  | 60/23049  | 0.656447 | 0.767993 | 0.740139 | Camk2a/Ca   |
| GO_MF_mf:GO:000422 | metalloenc   | 10/2529 | 99/23049  | 0.656979 | 0.768198 | 0.740337 | Adam2/Ad    |
| GO_MF_mf:GO:000122 | transcriptic | 2/2529  | 20/23049  | 0.661123 | 0.770952 | 0.742991 | Foxc1/Rpl2  |
| GO_MF_mf:GO:003121 | phosphatic   | 2/2529  | 20/23049  | 0.661123 | 0.770952 | 0.742991 | Nf1/Pltp    |
| GO_MF_mf:GO:003148 | myosin V b   | 2/2529  | 20/23049  | 0.661123 | 0.770952 | 0.742991 | Gria1/Rab2  |
| GO_MF_mf:GO:004297 | peroxisom    | 2/2529  | 20/23049  | 0.661123 | 0.770952 | 0.742991 | Asxl1/Ppar  |
| GO_MF_mf:GO:005098 | quaternary   | 2/2529  | 20/23049  | 0.661123 | 0.770952 | 0.742991 | Nf1/Pltp    |
| GO_MF_mf:GO:000532 | neurotrans   | 5/2529  | 51/23049  | 0.671613 | 0.782762 | 0.754373 | Slc18a2/Slc |
| GO_MF_mf:GO:000523 | extracellula | 7/2529  | 71/23049  | 0.674149 | 0.785292 | 0.756811 | Chrne/Chrr  |
| GO_MF_mf:GO:001641 | S-acyltrans  | 3/2529  | 31/23049  | 0.676406 | 0.787332 | 0.758777 | Fasn/Ykt6/  |
| GO_MF_mf:GO:000122 | transcriptic | 24/2529 | 235/23049 | 0.676631 | 0.787332 | 0.758777 | Ifi202/Arx/ |
| GO_MF_mf:GO:000400 | adenosine    | 1/2529  | 10/23049  | 0.687285 | 0.788592 | 0.759991 | Adat1       |
| GO_MF_mf:GO:000443 | phosphatic   | 1/2529  | 10/23049  | 0.687285 | 0.788592 | 0.759991 | Synj1       |
| GO_MF_mf:GO:000456 | chitinase a  | 1/2529  | 10/23049  | 0.687285 | 0.788592 | 0.759991 | Chil5       |
| GO_MF_mf:GO:000543 | sodium:ph    | 1/2529  | 10/23049  | 0.687285 | 0.788592 | 0.759991 | Slc20a1     |
| GO_MF_mf:GO:000865 | cysteine-ty  | 1/2529  | 10/23049  | 0.687285 | 0.788592 | 0.759991 | Tnfrsf10b   |
| GO_MF_mf:GO:000988 | photorecep   | 1/2529  | 10/23049  | 0.687285 | 0.788592 | 0.759991 | Opn4        |
| GO_MF_mf:GO:001516 | pyrimidine   | 1/2529  | 10/23049  | 0.687285 | 0.788592 | 0.759991 | Slc35a5     |
| GO_MF_mf:GO:001592 | mannosyl-    | 1/2529  | 10/23049  | 0.687285 | 0.788592 | 0.759991 | Man1b1      |
| GO_MF_mf:GO:001688 | endodeoxy    | 1/2529  | 10/23049  | 0.687285 | 0.788592 | 0.759991 | Fen1        |
| GO_MF_mf:GO:001707 | U6 snRNA     | 1/2529  | 10/23049  | 0.687285 | 0.788592 | 0.759991 | Prpf4       |
| GO_MF_mf:GO:001995 | C-C chem     | 1/2529  | 10/23049  | 0.687285 | 0.788592 | 0.759991 | Ccr1        |
| GO_MF_mf:GO:003170 | type 1 angi  | 1/2529  | 10/23049  | 0.687285 | 0.788592 | 0.759991 | Ednrb       |
| GO_MF_mf:GO:003198 | thioesteras  | 1/2529  | 10/23049  | 0.687285 | 0.788592 | 0.759991 | Haus7       |
| GO_MF_mf:GO:003518 | siRNA bind   | 1/2529  | 10/23049  | 0.687285 | 0.788592 | 0.759991 | Fmr1        |
| GO_MF_mf:GO:003561 | clathrin ad  | 1/2529  | 10/23049  | 0.687285 | 0.788592 | 0.759991 | Ldlrap1     |
| GO_MF_mf:GO:004257 | lipid phosph | 1/2529  | 10/23049  | 0.687285 | 0.788592 | 0.759991 | Ephx2       |
| GO_MF_mf:GO:004708 | ketosteroid  | 1/2529  | 10/23049  | 0.687285 | 0.788592 | 0.759991 | Akr1c12     |
| GO_MF_mf:GO:004742 | nucleoside   | 1/2529  | 10/23049  | 0.687285 | 0.788592 | 0.759991 | Nudt1       |
| GO_MF_mf:GO:005070 | CARD dom     | 1/2529  | 10/23049  | 0.687285 | 0.788592 | 0.759991 | Nod1        |
| GO_MF_mf:GO:007051 | death dom    | 1/2529  | 10/23049  | 0.687285 | 0.788592 | 0.759991 | Dapl1       |
| GO_MF_mf:GO:007193 | Arp2/3 cor   | 1/2529  | 10/23049  | 0.687285 | 0.788592 | 0.759991 | Snx9        |
| GO_MF_mf:GO:009700 | ceramide b   | 1/2529  | 10/23049  | 0.687285 | 0.788592 | 0.759991 | Pltp        |
| GO_MF_mf:GO:009850 | G-rich str   | 1/2529  | 10/23049  | 0.687285 | 0.788592 | 0.759991 | Nabp2       |
| GO_MF_mf:GO:009874 | endocytic    | 1/2529  | 10/23049  | 0.687285 | 0.788592 | 0.759991 | Ldlrap1     |
| GO_MF_mf:GO:010102 | estrogen     | 1/2529  | 10/23049  | 0.687285 | 0.788592 | 0.759991 | Cyp3a11     |
| GO_MF_mf:GO:199040 | protein ant  | 1/2529  | 10/23049  | 0.687285 | 0.788592 | 0.759991 | Ppp2r1a     |
| GO_MF_mf:GO:000400 | alditol:NAC  | 2/2529  | 21/23049  | 0.687594 | 0.788592 | 0.759991 | Akr1b10/A   |
| GO_MF_mf:GO:000367 | DNA helica   | 4/2529  | 42/23049  | 0.691103 | 0.791774 | 0.763058 | Blm/Fbxo1.  |
| GO_MF_mf:GO:000452 | endodeoxy    | 4/2529  | 42/23049  | 0.691103 | 0.791774 | 0.763058 | Aplf/Ercc5/ |
| GO_MF_mf:GO:000108 | RNA polym    | 15/2529 | 151/23049 | 0.697007 | 0.797444 | 0.768522 | Ankrd1/Bb   |
| GO_MF_mf:GO:000507 | SH3/SH2 a    | 3/2529  | 32/23049  | 0.697532 | 0.797444 | 0.768522 | Bcar3/Nck2  |
| GO_MF_mf:GO:004297 | retinoic aci | 3/2529  | 32/23049  | 0.697532 | 0.797444 | 0.768522 | Asxl1/Nr1h  |
| GO_MF_mf:GO:007027 | phosphatic   | 3/2529  | 32/23049  | 0.697532 | 0.797444 | 0.768522 | Gsdmc2/Gs   |
| GO_MF_mf:GO:000554 | phosphatic   | 7/2529  | 73/23049  | 0.702494 | 0.802265 | 0.773168 | Anxa2/Gsd   |
| GO_MF_mf:GO:000839 | steroid hyc  | 7/2529  | 73/23049  | 0.702494 | 0.802265 | 0.773168 | Cyp2b10/C   |
| GO_MF_mf:GO:001900 | GDP bindir   | 6/2529  | 63/23049  | 0.702916 | 0.802322 | 0.773224 | Gnai1/Rab   |
| GO_MF_mf:GO:002282 | transmitter  | 5/2529  | 53/23049  | 0.70477  | 0.803586 | 0.774442 | Chrne/Chrr  |

|                                        |           |          |          |          |            |
|----------------------------------------|-----------|----------|----------|----------|------------|
| GO_MF_mf:GO:002283 transmitter 5/2529  | 53/23049  | 0.70477  | 0.803586 | 0.774442 | Chrne/Chrn |
| GO_MF_mf:GO:001566 ATPase act 4/2529   | 43/23049  | 0.709006 | 0.807212 | 0.777936 | Atp1b2/Atq |
| GO_MF_mf:GO:004439 ubiquitin-li 4/2529 | 43/23049  | 0.709006 | 0.807212 | 0.777936 | Arih2/Lonr |
| GO_MF_mf:GO:000425 serine-type 19/2529 | 191/23049 | 0.709073 | 0.807212 | 0.777936 | Apeh/C1rl/ |
| GO_MF_mf:GO:000814 poly(A) bin 2/2529  | 22/23049  | 0.712338 | 0.807411 | 0.778128 | Pabpc11/Pp |
| GO_MF_mf:GO:001527 calcium-re 2/2529   | 22/23049  | 0.712338 | 0.807411 | 0.778128 | Jph3/Mcoli |
| GO_MF_mf:GO:001691 GABA rece 2/2529    | 22/23049  | 0.712338 | 0.807411 | 0.778128 | Gabra6/Ga  |
| GO_MF_mf:GO:003050 ankyrin bin 2/2529  | 22/23049  | 0.712338 | 0.807411 | 0.778128 | Cdh1/Kcnq  |
| GO_MF_mf:GO:004281 Wnt-activa 2/2529   | 22/23049  | 0.712338 | 0.807411 | 0.778128 | Lrp4/Smo   |
| GO_MF_mf:GO:004696 retinoid X r 2/2529 | 22/23049  | 0.712338 | 0.807411 | 0.778128 | Nr1h2/Uim  |
| GO_MF_mf:GO:000516 tumor necr 3/2529   | 33/23049  | 0.717593 | 0.807411 | 0.778128 | Babam2/Ca  |
| GO_MF_mf:GO:190156 fatty acid d 3/2529 | 33/23049  | 0.717593 | 0.807411 | 0.778128 | Cyp4f14/Ec |
| GO_MF_mf:GO:000116 RNA polymr 1/2529   | 11/23049  | 0.721612 | 0.807411 | 0.778128 | Tbx1       |
| GO_MF_mf:GO:000120 transcriptic 1/2529 | 11/23049  | 0.721612 | 0.807411 | 0.778128 | Arx        |
| GO_MF_mf:GO:000431 fatty acid s 1/2529 | 11/23049  | 0.721612 | 0.807411 | 0.778128 | Fasn       |
| GO_MF_mf:GO:000452 ribonuclea 1/2529   | 11/23049  | 0.721612 | 0.807411 | 0.778128 | Rpp40      |
| GO_MF_mf:GO:000522 intracellula 1/2529 | 11/23049  | 0.721612 | 0.807411 | 0.778128 | Cnga2      |
| GO_MF_mf:GO:000806 chitin bindi 1/2529 | 11/23049  | 0.721612 | 0.807411 | 0.778128 | Chil5      |
| GO_MF_mf:GO:000841 fucosyltran 1/2529  | 11/23049  | 0.721612 | 0.807411 | 0.778128 | Fut8       |
| GO_MF_mf:GO:000850 benzodiaz 1/2529    | 11/23049  | 0.721612 | 0.807411 | 0.778128 | Gabra6     |
| GO_MF_mf:GO:001529 anion:catio 1/2529  | 11/23049  | 0.721612 | 0.807411 | 0.778128 | Slc12a2    |
| GO_MF_mf:GO:001684 carbon-sul 1/2529   | 11/23049  | 0.721612 | 0.807411 | 0.778128 | Ltc4s      |
| GO_MF_mf:GO:001910 pyrimidine 1/2529   | 11/23049  | 0.721612 | 0.807411 | 0.778128 | Ugp2       |
| GO_MF_mf:GO:001953 oxalate tra 1/2529  | 11/23049  | 0.721612 | 0.807411 | 0.778128 | Slc26a7    |
| GO_MF_mf:GO:003203 myosin he 1/2529    | 11/23049  | 0.721612 | 0.807411 | 0.778128 | Myl9       |
| GO_MF_mf:GO:003500 phosphatic 1/2529   | 11/23049  | 0.721612 | 0.807411 | 0.778128 | Pik3r6     |
| GO_MF_mf:GO:003561 AP-2 adap 1/2529    | 11/23049  | 0.721612 | 0.807411 | 0.778128 | Ldlrap1    |
| GO_MF_mf:GO:003612 BMP bindir 1/2529   | 11/23049  | 0.721612 | 0.807411 | 0.778128 | Grem2      |
| GO_MF_mf:GO:004217 lysophosph 1/2529   | 11/23049  | 0.721612 | 0.807411 | 0.778128 | Agpat2     |
| GO_MF_mf:GO:004352 leucine zip 1/2529  | 11/23049  | 0.721612 | 0.807411 | 0.778128 | Mkl1       |
| GO_MF_mf:GO:004385 cyclic nucle 1/2529 | 11/23049  | 0.721612 | 0.807411 | 0.778128 | Cnga2      |
| GO_MF_mf:GO:004697 TAP bindin 1/2529   | 11/23049  | 0.721612 | 0.807411 | 0.778128 | H2-Q2      |
| GO_MF_mf:GO:004818 activin binc 1/2529 | 11/23049  | 0.721612 | 0.807411 | 0.778128 | Smad7      |
| GO_MF_mf:GO:005032 tau-proteir 1/2529  | 11/23049  | 0.721612 | 0.807411 | 0.778128 | Cdk5       |
| GO_MF_mf:GO:005186 histone der 1/2529  | 11/23049  | 0.721612 | 0.807411 | 0.778128 | Kdm2b      |
| GO_MF_mf:GO:005274 phosphatic 1/2529   | 11/23049  | 0.721612 | 0.807411 | 0.778128 | Synj1      |
| GO_MF_mf:GO:006022 lipase activ 1/2529 | 11/23049  | 0.721612 | 0.807411 | 0.778128 | Stx4a      |
| GO_MF_mf:GO:000504 scavenger 4/2529    | 44/23049  | 0.726139 | 0.811633 | 0.782197 | Corin/Enpp |
| GO_MF_mf:GO:004260 peptide an 4/2529   | 44/23049  | 0.726139 | 0.811633 | 0.782197 | Gm11127/l  |
| GO_MF_mf:GO:000418 metallocal 2/2529   | 23/23049  | 0.735416 | 0.819986 | 0.790246 | Cpm/Cpz    |
| GO_MF_mf:GO:000553 mannose b 2/2529    | 23/23049  | 0.735416 | 0.819986 | 0.790246 | Cd209d/Ig  |
| GO_MF_mf:GO:003525 UDP-galac 2/2529    | 23/23049  | 0.735416 | 0.819986 | 0.790246 | Abo/B4gali |
| GO_MF_mf:GO:005078 dopamine 2/2529     | 23/23049  | 0.735416 | 0.819986 | 0.790246 | Drd3/Grin2 |
| GO_MF_mf:GO:000814 sulfotransf 5/2529  | 55/23049  | 0.735514 | 0.819986 | 0.790246 | Chst13/Dse |
| GO_MF_mf:GO:000521 intracellula 3/2529 | 34/23049  | 0.736605 | 0.820778 | 0.79101  | Cnga2/Jph  |
| GO_MF_mf:GO:003067 protein bin 12/2529 | 127/23049 | 0.749748 | 0.82785  | 0.797826 | Arrdc4/Bca |
| GO_MF_mf:GO:001983 growth fac 14/2529  | 147/23049 | 0.751172 | 0.82785  | 0.797826 | Cd36/Col5. |
| GO_MF_mf:GO:000173 2'-5'-oligo 1/2529  | 12/23049  | 0.752172 | 0.82785  | 0.797826 | Oas1f      |

|                    |                     |           |          |          |          |              |
|--------------------|---------------------|-----------|----------|----------|----------|--------------|
| GO_MF_mf:GO:000216 | aminoacyl-1/2529    | 12/23049  | 0.752172 | 0.82785  | 0.797826 | Vars2        |
| GO_MF_mf:GO:000395 | NAD+ kina1/2529     | 12/23049  | 0.752172 | 0.82785  | 0.797826 | Dgkq         |
| GO_MF_mf:GO:000487 | compleme1/2529      | 12/23049  | 0.752172 | 0.82785  | 0.797826 | Fpr2         |
| GO_MF_mf:GO:000539 | sodium:poi1/2529    | 12/23049  | 0.752172 | 0.82785  | 0.797826 | Atp1b2       |
| GO_MF_mf:GO:000827 | secondary 1/2529    | 12/23049  | 0.752172 | 0.82785  | 0.797826 | Slc26a7      |
| GO_MF_mf:GO:000833 | high voltaç1/2529   | 12/23049  | 0.752172 | 0.82785  | 0.797826 | Cacnb2       |
| GO_MF_mf:GO:000855 | potassium-1/2529    | 12/23049  | 0.752172 | 0.82785  | 0.797826 | Atp1b2       |
| GO_MF_mf:GO:001503 | peptide dis1/2529   | 12/23049  | 0.752172 | 0.82785  | 0.797826 | Pdia6        |
| GO_MF_mf:GO:001511 | phosphate 1/2529    | 12/23049  | 0.752172 | 0.82785  | 0.797826 | Ank          |
| GO_MF_mf:GO:001692 | SUMO-spe1/2529      | 12/23049  | 0.752172 | 0.82785  | 0.797826 | Senp1        |
| GO_MF_mf:GO:002285 | GABA-gatç1/2529     | 12/23049  | 0.752172 | 0.82785  | 0.797826 | Gabra6       |
| GO_MF_mf:GO:003088 | beta-2-mic1/2529    | 12/23049  | 0.752172 | 0.82785  | 0.797826 | H2-Q2        |
| GO_MF_mf:GO:003168 | G-protein l1/2529   | 12/23049  | 0.752172 | 0.82785  | 0.797826 | Gria1        |
| GO_MF_mf:GO:003170 | angiotensir1/2529   | 12/23049  | 0.752172 | 0.82785  | 0.797826 | Ednrb        |
| GO_MF_mf:GO:003174 | D1 dopami1/2529     | 12/23049  | 0.752172 | 0.82785  | 0.797826 | Drd3         |
| GO_MF_mf:GO:003245 | histone der1/2529   | 12/23049  | 0.752172 | 0.82785  | 0.797826 | Kdm3b        |
| GO_MF_mf:GO:003525 | G-protein r1/2529   | 12/23049  | 0.752172 | 0.82785  | 0.797826 | Dnm3         |
| GO_MF_mf:GO:003549 | cAMP resp 1/2529    | 12/23049  | 0.752172 | 0.82785  | 0.797826 | Creb3l3      |
| GO_MF_mf:GO:003970 | co-receptç1/2529    | 12/23049  | 0.752172 | 0.82785  | 0.797826 | Wnt3a        |
| GO_MF_mf:GO:004304 | single-strai1/2529  | 12/23049  | 0.752172 | 0.82785  | 0.797826 | Nabp2        |
| GO_MF_mf:GO:005066 | oxidoreduc1/2529    | 12/23049  | 0.752172 | 0.82785  | 0.797826 | Aifm1        |
| GO_MF_mf:GO:004317 | alcohol bin7/2529   | 77/23049  | 0.754133 | 0.829239 | 0.799164 | Adh1/Crab    |
| GO_MF_mf:GO:000515 | epidermal r3/2529   | 35/23049  | 0.754588 | 0.829239 | 0.799164 | Ms4a1/Nrc    |
| GO_MF_mf:GO:004216 | telomeric L3/2529   | 35/23049  | 0.754588 | 0.829239 | 0.799164 | Hmbox1/N     |
| GO_MF_mf:GO:000373 | structural c18/2529 | 187/23049 | 0.756125 | 0.830505 | 0.800384 | Mrpl10/Mr    |
| GO_MF_mf:GO:000411 | 3',5'-cyclic-2/2529 | 24/23049  | 0.756895 | 0.830927 | 0.800791 | Pde11a/Pd    |
| GO_MF_mf:GO:003016 | PDZ domai11/2529    | 118/23049 | 0.759329 | 0.83275  | 0.802548 | Atp2b4/Ca    |
| GO_MF_mf:GO:004282 | histone der11/2529  | 118/23049 | 0.759329 | 0.83275  | 0.802548 | Ankra2/An    |
| GO_MF_mf:GO:000549 | steroid bin10/2529  | 109/23049 | 0.769865 | 0.843876 | 0.81327  | Akr1c12/At   |
| GO_MF_mf:GO:004317 | RNA polym3/2529     | 36/23049  | 0.771567 | 0.845311 | 0.814654 | Rtraf/Esrrb, |
| GO_MF_mf:GO:000153 | lipopolysac2/2529   | 25/23049  | 0.776848 | 0.846553 | 0.81585  | Scarb1/Spç   |
| GO_MF_mf:GO:000411 | cyclic-nuclç2/2529  | 25/23049  | 0.776848 | 0.846553 | 0.81585  | Pde11a/Pd    |
| GO_MF_mf:GO:000107 | transcriptic15/2529 | 160/23049 | 0.777161 | 0.846553 | 0.81585  | Ifi207/Atf3, |
| GO_MF_mf:GO:000371 | transcriptic17/2529 | 180/23049 | 0.778179 | 0.846553 | 0.81585  | Ankrd1/Ba:   |
| GO_MF_mf:GO:000390 | DNA-(apur1/2529     | 13/23049  | 0.779379 | 0.846553 | 0.81585  | Aplf         |
| GO_MF_mf:GO:000411 | 3',5'-cyclic-1/2529 | 13/23049  | 0.779379 | 0.846553 | 0.81585  | Pde4b        |
| GO_MF_mf:GO:000446 | long-chain 1/2529   | 13/23049  | 0.779379 | 0.846553 | 0.81585  | Acsl1        |
| GO_MF_mf:GO:000847 | palmitoyl-(1/2529   | 13/23049  | 0.779379 | 0.846553 | 0.81585  | Ppt1         |
| GO_MF_mf:GO:001511 | sulfate tran1/2529  | 13/23049  | 0.779379 | 0.846553 | 0.81585  | Slc26a7      |
| GO_MF_mf:GO:001527 | store-oper 1/2529   | 13/23049  | 0.779379 | 0.846553 | 0.81585  | Stim2        |
| GO_MF_mf:GO:001564 | toxic substç1/2529  | 13/23049  | 0.779379 | 0.846553 | 0.81585  | Ephx2        |
| GO_MF_mf:GO:001592 | glucosidasç1/2529   | 13/23049  | 0.779379 | 0.846553 | 0.81585  | Pgghg        |
| GO_MF_mf:GO:001920 | nucleoside 1/2529   | 13/23049  | 0.779379 | 0.846553 | 0.81585  | Adk          |
| GO_MF_mf:GO:003532 | Toll-like re1/2529  | 13/23049  | 0.779379 | 0.846553 | 0.81585  | Cd36         |
| GO_MF_mf:GO:003631 | phosphatic1/2529    | 13/23049  | 0.779379 | 0.846553 | 0.81585  | Ptpn13       |
| GO_MF_mf:GO:004755 | 3',5'-cyclic-1/2529 | 13/23049  | 0.779379 | 0.846553 | 0.81585  | Pde11a       |
| GO_MF_mf:GO:009859 | palmitoyl h1/2529   | 13/23049  | 0.779379 | 0.846553 | 0.81585  | Ppt1         |
| GO_MF_mf:GO:000487 | nuclear rec4/2529   | 48/23049  | 0.787128 | 0.853302 | 0.822354 | Nr1h2/Nr4    |

|                                       |           |          |          |          |             |
|---------------------------------------|-----------|----------|----------|----------|-------------|
| GO_MF_mf:GO:009853transcriptic4/2529  | 48/23049  | 0.787128 | 0.853302 | 0.822354 | Nr1h2/Nr4   |
| GO_MF_mf:GO:000097RNA polymr3/2529    | 37/23049  | 0.787572 | 0.853302 | 0.822354 | H2afy/H2a   |
| GO_MF_mf:GO:001687ligase activ3/2529  | 37/23049  | 0.787572 | 0.853302 | 0.822354 | Acs1/Acsn   |
| GO_MF_mf:GO:004353ADP bindir3/2529    | 37/23049  | 0.787572 | 0.853302 | 0.822354 | Atp5a1/My   |
| GO_MF_mf:GO:000378actin monoc2/2529   | 26/23049  | 0.795352 | 0.860002 | 0.828811 | Mkl1/Tmsk   |
| GO_MF_mf:GO:000419aspartic-ty2/2529   | 26/23049  | 0.795352 | 0.860002 | 0.828811 | Napsa/Nrip  |
| GO_MF_mf:GO:000515insulin rece2/2529  | 26/23049  | 0.795352 | 0.860002 | 0.828811 | Ptpn1/Snx2  |
| GO_MF_mf:GO:000535glucose tra2/2529   | 26/23049  | 0.795352 | 0.860002 | 0.828811 | Slc2a1/Slc5 |
| GO_MF_mf:GO:000107transcriptic18/2529 | 193/23049 | 0.800232 | 0.863719 | 0.832394 | Ankrd1/Arr  |
| GO_MF_mf:GO:001529symporter 13/2529   | 143/23049 | 0.801654 | 0.863719 | 0.832394 | Slc10a4/Slc |
| GO_MF_mf:GO:000116intronic tra1/2529  | 14/23049  | 0.8036   | 0.863719 | 0.832394 | Tbx1        |
| GO_MF_mf:GO:000408carbonate r1/2529   | 14/23049  | 0.8036   | 0.863719 | 0.832394 | Car15       |
| GO_MF_mf:GO:000455alpha-man1/2529     | 14/23049  | 0.8036   | 0.863719 | 0.832394 | Man1b1      |
| GO_MF_mf:GO:001031phosphatic1/2529    | 14/23049  | 0.8036   | 0.863719 | 0.832394 | Wipi2       |
| GO_MF_mf:GO:001659glutamate 1/2529    | 14/23049  | 0.8036   | 0.863719 | 0.832394 | Grin2b      |
| GO_MF_mf:GO:003448heparan su1/2529    | 14/23049  | 0.8036   | 0.863719 | 0.832394 | Hs6st1      |
| GO_MF_mf:GO:004815tau protein1/2529   | 14/23049  | 0.8036   | 0.863719 | 0.832394 | Snca        |
| GO_MF_mf:GO:005081GABA rece1/2529     | 14/23049  | 0.8036   | 0.863719 | 0.832394 | Maf1        |
| GO_MF_mf:GO:005140BH domain1/2529     | 14/23049  | 0.8036   | 0.863719 | 0.832394 | Bok         |
| GO_MF_mf:GO:009884sequence-:1/2529    | 14/23049  | 0.8036   | 0.863719 | 0.832394 | Nabp2       |
| GO_MF_mf:GO:000377microtubul7/2529    | 82/23049  | 0.809197 | 0.869024 | 0.837506 | Dnah1/Dna   |
| GO_MF_mf:GO:000518neuropepti2/2529    | 27/23049  | 0.812483 | 0.869024 | 0.837506 | Cartpt/Prlh |
| GO_MF_mf:GO:000534organic aci2/2529   | 27/23049  | 0.812483 | 0.869024 | 0.837506 | Slc10a4/Slc |
| GO_MF_mf:GO:000810alcohol del2/2529   | 27/23049  | 0.812483 | 0.869024 | 0.837506 | Akr1b10/A   |
| GO_MF_mf:GO:001514hexose trar2/2529   | 27/23049  | 0.812483 | 0.869024 | 0.837506 | Slc2a1/Slc5 |
| GO_MF_mf:GO:001970protein-cy:2/2529   | 27/23049  | 0.812483 | 0.869024 | 0.837506 | Ykt6/Zdhhc  |
| GO_MF_mf:GO:001970protein-cy:2/2529   | 27/23049  | 0.812483 | 0.869024 | 0.837506 | Ykt6/Zdhhc  |
| GO_MF_mf:GO:007000aspartic-ty2/2529   | 27/23049  | 0.812483 | 0.869024 | 0.837506 | Napsa/Nrip  |
| GO_MF_mf:GO:190468peptide tra2/2529   | 27/23049  | 0.812483 | 0.869024 | 0.837506 | Timm17b/1   |
| GO_MF_mf:GO:000823metalloexo4/2529    | 50/23049  | 0.813285 | 0.869024 | 0.837506 | Cpm/Cpz/l   |
| GO_MF_mf:GO:004530protein ph4/2529    | 50/23049  | 0.813285 | 0.869024 | 0.837506 | Abl2/Ldlra  |
| GO_MF_mf:GO:000508protein kin5/2529   | 61/23049  | 0.813522 | 0.869024 | 0.837506 | Adcy4/Pkn   |
| GO_MF_mf:GO:000115enhancer s8/2529    | 93/23049  | 0.813777 | 0.869024 | 0.837506 | Arx/Esrrb/F |
| GO_MF_mf:GO:001534sodium-inc3/2529    | 39/23049  | 0.816788 | 0.871807 | 0.840188 | Slc22a1/Slc |
| GO_MF_mf:GO:000159trace-amin1/2529    | 15/23049  | 0.825162 | 0.876164 | 0.844387 | Taar9       |
| GO_MF_mf:GO:000470MAP kinas1/2529     | 15/23049  | 0.825162 | 0.876164 | 0.844387 | Mapk13      |
| GO_MF_mf:GO:000516neurotropt1/2529    | 15/23049  | 0.825162 | 0.876164 | 0.844387 | Ntf5        |
| GO_MF_mf:GO:000538calcium-tra1/2529   | 15/23049  | 0.825162 | 0.876164 | 0.844387 | Atp2b4      |
| GO_MF_mf:GO:001592mannosida1/2529     | 15/23049  | 0.825162 | 0.876164 | 0.844387 | Man1b1      |
| GO_MF_mf:GO:002284potassium 1/2529    | 15/23049  | 0.825162 | 0.876164 | 0.844387 | Kcnk2       |
| GO_MF_mf:GO:003205bile acid bi1/2529  | 15/23049  | 0.825162 | 0.876164 | 0.844387 | Akr1c12     |
| GO_MF_mf:GO:004314single-strai1/2529  | 15/23049  | 0.825162 | 0.876164 | 0.844387 | Helq        |
| GO_MF_mf:GO:004421intronic tra1/2529  | 15/23049  | 0.825162 | 0.876164 | 0.844387 | Tbx1        |
| GO_MF_mf:GO:004550dynein hea1/2529    | 15/23049  | 0.825162 | 0.876164 | 0.844387 | Dnaic2      |
| GO_MF_mf:GO:199093ATP-deper4/2529     | 51/23049  | 0.825342 | 0.876164 | 0.844387 | Dnah1/Dna   |
| GO_MF_mf:GO:001529secondary 23/2529   | 247/23049 | 0.826287 | 0.876735 | 0.844937 | Ank/Cln4/   |
| GO_MF_mf:GO:190168sulfur com2/2529    | 28/23049  | 0.828321 | 0.878077 | 0.84623  | Slc26a7/Slc |
| GO_MF_mf:GO:003525steroid hor7/2529   | 84/23049  | 0.828366 | 0.878077 | 0.84623  | Calr/Lats1/ |

|                    |                                    |         |           |          |          |          |             |
|--------------------|------------------------------------|---------|-----------|----------|----------|----------|-------------|
| GO_MF_mf:GO:001706 | snRNA binding                      | 3/2529  | 40/23049  | 0.830069 | 0.879449 | 0.847553 | Ddx21/Hex   |
| GO_MF_mf:GO:001507 | monovalent ion transport           | 35/2529 | 369/23049 | 0.842868 | 0.889341 | 0.857087 | Atp1b2/Atf  |
| GO_MF_mf:GO:000110 | RNA polymerase activity            | 2/2529  | 29/23049  | 0.842942 | 0.889341 | 0.857087 | Hdac1/Hsp   |
| GO_MF_mf:GO:001514 | monosaccharide transport           | 2/2529  | 29/23049  | 0.842942 | 0.889341 | 0.857087 | Slc2a1/Slc5 |
| GO_MF_mf:GO:003644 | proton export                      | 2/2529  | 29/23049  | 0.842942 | 0.889341 | 0.857087 | Atp6v0c/Tc  |
| GO_MF_mf:GO:004550 | dynein light chain activity        | 2/2529  | 29/23049  | 0.842942 | 0.889341 | 0.857087 | Dnah1/Dna   |
| GO_MF_mf:GO:003041 | peptidase inhibitor activity       | 19/2529 | 210/23049 | 0.84352  | 0.889341 | 0.857087 | Col28a1/Cs  |
| GO_MF_mf:GO:000486 | endopeptidase activity             | 18/2529 | 200/23049 | 0.84419  | 0.889341 | 0.857087 | Col28a1/Cs  |
| GO_MF_mf:GO:000396 | acyl-CoA catabolism                | 1/2529  | 16/23049  | 0.844358 | 0.889341 | 0.857087 | Acad11      |
| GO_MF_mf:GO:001509 | magnesium ion transport            | 1/2529  | 16/23049  | 0.844358 | 0.889341 | 0.857087 | Zdhhc13     |
| GO_MF_mf:GO:004260 | T cell receptor activity           | 1/2529  | 16/23049  | 0.844358 | 0.889341 | 0.857087 | H2-Q2       |
| GO_MF_mf:GO:005137 | muscle alpha-actinin-1 activity    | 1/2529  | 16/23049  | 0.844358 | 0.889341 | 0.857087 | Mypn        |
| GO_MF_mf:GO:199038 | ubiquitin-signalosome activity     | 1/2529  | 16/23049  | 0.844358 | 0.889341 | 0.857087 | Park2       |
| GO_MF_mf:GO:001537 | solute:sodium ion transport        | 6/2529  | 75/23049  | 0.844788 | 0.889359 | 0.857104 | Slc10a4/Slc |
| GO_MF_mf:GO:000486 | serine-type endopeptidase activity | 10/2529 | 119/23049 | 0.853658 | 0.898258 | 0.86568  | Col28a1/Pt  |
| GO_MF_mf:GO:000403 | aldo-ketoreductase activity        | 2/2529  | 30/23049  | 0.856423 | 0.89985  | 0.867214 | Akr1b10/A   |
| GO_MF_mf:GO:005111 | sugar transport                    | 2/2529  | 30/23049  | 0.856423 | 0.89985  | 0.867214 | Slc2a1/Slc5 |
| GO_MF_mf:GO:007185 | neuropeptide activity              | 2/2529  | 30/23049  | 0.856423 | 0.89985  | 0.867214 | Prlh/Tac1   |
| GO_MF_mf:GO:000517 | hormone alpha-1 activity           | 1/2529  | 130/23049 | 0.856856 | 0.899866 | 0.867229 | Adm/Amhr    |
| GO_MF_mf:GO:009951 | ion antiporter activity            | 4/2529  | 54/23049  | 0.857686 | 0.900299 | 0.867647 | Slc22a5/Slc |
| GO_MF_mf:GO:005142 | hormone receptor activity          | 15/2529 | 172/23049 | 0.859348 | 0.901175 | 0.868491 | Asxl1/Bcas  |
| GO_MF_mf:GO:000109 | RNA polymerase activity            | 1/2529  | 17/23049  | 0.861448 | 0.901175 | 0.868491 | Tbp         |
| GO_MF_mf:GO:000455 | nucleoside transport               | 1/2529  | 17/23049  | 0.861448 | 0.901175 | 0.868491 | Nme6        |
| GO_MF_mf:GO:000455 | nucleotide transport               | 1/2529  | 17/23049  | 0.861448 | 0.901175 | 0.868491 | Enpp2       |
| GO_MF_mf:GO:000523 | inhibitory enzyme activity         | 1/2529  | 17/23049  | 0.861448 | 0.901175 | 0.868491 | Gabra6      |
| GO_MF_mf:GO:004342 | protein kinase activity            | 1/2529  | 17/23049  | 0.861448 | 0.901175 | 0.868491 | App1        |
| GO_MF_mf:GO:004670 | natural killer cell activity       | 1/2529  | 17/23049  | 0.861448 | 0.901175 | 0.868491 | Ubp1        |
| GO_MF_mf:GO:000823 | metalloproteinase activity         | 15/2529 | 173/23049 | 0.864974 | 0.903625 | 0.870852 | Acy1/Adan   |
| GO_MF_mf:GO:001920 | nucleobase transport               | 3/2529  | 43/23049  | 0.865048 | 0.903625 | 0.870852 | Adk/N4bp2   |
| GO_MF_mf:GO:003293 | sterol binding                     | 3/2529  | 43/23049  | 0.865048 | 0.903625 | 0.870852 | Gpr183/Os   |
| GO_MF_mf:GO:000099 | RNA polymerase activity            | 2/2529  | 31/23049  | 0.868838 | 0.906705 | 0.87382  | Rtraf/Esrrb |
| GO_MF_mf:GO:000545 | inorganic anion transport          | 2/2529  | 31/23049  | 0.868838 | 0.906705 | 0.87382  | Slc22a1/Slc |
| GO_MF_mf:GO:004313 | ubiquitin b5 activity              | 5/2529  | 67/23049  | 0.871937 | 0.909498 | 0.876513 | Nploc4/Pai  |
| GO_MF_mf:GO:001986 | immunoglobulin activity            | 1/2529  | 18/23049  | 0.876661 | 0.912659 | 0.879559 | Ms4a2       |
| GO_MF_mf:GO:002284 | leak channel activity              | 1/2529  | 18/23049  | 0.876661 | 0.912659 | 0.879559 | Kcnk2       |
| GO_MF_mf:GO:002284 | narrow pore channel activity       | 1/2529  | 18/23049  | 0.876661 | 0.912659 | 0.879559 | Kcnk2       |
| GO_MF_mf:GO:005118 | cofactor transferase activity      | 1/2529  | 18/23049  | 0.876661 | 0.912659 | 0.879559 | Slc46a1     |
| GO_MF_mf:GO:009909 | ligand-gated channel activity      | 8/2529  | 101/23049 | 0.877102 | 0.912677 | 0.879576 | Chrne/Chrr  |
| GO_MF_mf:GO:000438 | helicase activity                  | 12/2529 | 144/23049 | 0.877961 | 0.913131 | 0.880013 | Blm/Ddx19   |
| GO_MF_mf:GO:004550 | dynein intermediate chain activity | 2/2529  | 32/23049  | 0.880258 | 0.914393 | 0.88123  | Dnah1/Paf   |
| GO_MF_mf:GO:006163 | ubiquitin alpha-2 activity         | 2/2529  | 32/23049  | 0.880258 | 0.914393 | 0.88123  | Ube2d1/Uk   |
| GO_MF_mf:GO:006113 | endopeptidase activity             | 18/2529 | 207/23049 | 0.880448 | 0.914393 | 0.88123  | Col28a1/Cs  |
| GO_MF_mf:GO:003559 | signaling pathway activity         | 4/2529  | 57/23049  | 0.884776 | 0.918445 | 0.885135 | Bcar3/Ldlra |
| GO_MF_mf:GO:000465 | polypeptide transport              | 1/2529  | 19/23049  | 0.890205 | 0.921449 | 0.88803  | Galnt9      |
| GO_MF_mf:GO:000540 | carbohydrate transport             | 1/2529  | 19/23049  | 0.890205 | 0.921449 | 0.88803  | Slc5a4a     |
| GO_MF_mf:GO:000855 | proton export                      | 1/2529  | 19/23049  | 0.890205 | 0.921449 | 0.88803  | Atp6v0c     |
| GO_MF_mf:GO:005186 | glycolipid transport               | 1/2529  | 19/23049  | 0.890205 | 0.921449 | 0.88803  | Pigu        |
| GO_MF_mf:GO:009760 | cullin family activity             | 1/2529  | 19/23049  | 0.890205 | 0.921449 | 0.88803  | Park2       |

|                                       |           |          |          |          |              |
|---------------------------------------|-----------|----------|----------|----------|--------------|
| GO_MF_mf:GO:005108chaperone 7/2529    | 92/23049  | 0.890235 | 0.921449 | 0.88803  | Ahsa2/Cdc    |
| GO_MF_mf:GO:006165ubiquitin-li2/2529  | 33/23049  | 0.890753 | 0.921542 | 0.888119 | Ube2d1/Ul    |
| GO_MF_mf:GO:003033estrogen r3/2529    | 46/23049  | 0.893521 | 0.923963 | 0.890452 | Lats1/Pcna   |
| GO_MF_mf:GO:003532enhancer b8/2529    | 104/23049 | 0.895751 | 0.925824 | 0.892246 | Arx/Esrrb/F  |
| GO_MF_mf:GO:001502glucuronos2/2529    | 34/23049  | 0.900387 | 0.926775 | 0.893163 | Csgalnact1   |
| GO_MF_mf:GO:003603pre-mRNA2/2529      | 34/23049  | 0.900387 | 0.926775 | 0.893163 | Eri1/Zrsr2   |
| GO_MF_mf:GO:009771disordered 2/2529   | 34/23049  | 0.900387 | 0.926775 | 0.893163 | Ezr/Hspa1a   |
| GO_MF_mf:GO:000107transcriptic26/2529 | 294/23049 | 0.900858 | 0.926775 | 0.893163 | Arid3c/Arn   |
| GO_MF_mf:GO:000109basal trans3/2529   | 47/23049  | 0.901739 | 0.926775 | 0.893163 | Rtraf/Esrrb, |
| GO_MF_mf:GO:000109basal RNA 3/2529    | 47/23049  | 0.901739 | 0.926775 | 0.893163 | Rtraf/Esrrb, |
| GO_MF_mf:GO:003149nucleosom3/2529     | 47/23049  | 0.901739 | 0.926775 | 0.893163 | Cenpa/H2a    |
| GO_MF_mf:GO:000113RNA polym1/2529     | 20/23049  | 0.902262 | 0.926775 | 0.893163 | Nr1h2        |
| GO_MF_mf:GO:000815protein phc1/2529   | 20/23049  | 0.902262 | 0.926775 | 0.893163 | Shoc2        |
| GO_MF_mf:GO:003525glucocortic1/2529   | 20/23049  | 0.902262 | 0.926775 | 0.893163 | Nr4a1        |
| GO_MF_mf:GO:003819neuropilin 1/2529   | 20/23049  | 0.902262 | 0.926775 | 0.893163 | Sema3f       |
| GO_MF_mf:GO:007006proline-ricl1/2529  | 20/23049  | 0.902262 | 0.926775 | 0.893163 | Gigyf2       |
| GO_MF_mf:GO:009909ligand-gatr1/2529   | 20/23049  | 0.902262 | 0.926775 | 0.893163 | Gabra6       |
| GO_MF_mf:GO:000098transcriptic41/2529 | 446/23049 | 0.904092 | 0.928114 | 0.894453 | lfi207/Arid3 |
| GO_MF_mf:GO:003294protein-co 6/2529   | 83/23049  | 0.904426 | 0.928114 | 0.894453 | Akap6/Cav    |
| GO_MF_mf:GO:000382antigen bir 18/2529 | 213/23049 | 0.905916 | 0.9292   | 0.8955   | Abo/Gm11     |
| GO_MF_mf:GO:001993phosphata:17/2529   | 203/23049 | 0.907708 | 0.930595 | 0.896844 | Akap6/Atp    |
| GO_MF_mf:GO:000856ATP-deper1/2529     | 21/23049  | 0.912995 | 0.934238 | 0.900355 | Dnah1        |
| GO_MF_mf:GO:003021semaphorin1/2529    | 21/23049  | 0.912995 | 0.934238 | 0.900355 | Sema3f       |
| GO_MF_mf:GO:003169adrenergic 1/2529   | 21/23049  | 0.912995 | 0.934238 | 0.900355 | Gria1        |
| GO_MF_mf:GO:004662sphingolipi1/2529   | 21/23049  | 0.912995 | 0.934238 | 0.900355 | Pltp         |
| GO_MF_mf:GO:000486cysteine-ty5/2529   | 73/23049  | 0.914048 | 0.934872 | 0.900965 | Cst6/Ctla2b  |
| GO_MF_mf:GO:000374translation 3/2529  | 49/23049  | 0.916478 | 0.936911 | 0.902931 | Eif1b/Eif3f/ |
| GO_MF_mf:GO:000003mannosyltr1/2529    | 22/23049  | 0.92255  | 0.942226 | 0.908053 | Pigb         |
| GO_MF_mf:GO:001513bicarbonat1/2529    | 22/23049  | 0.92255  | 0.942226 | 0.908053 | Slc26a7      |
| GO_MF_mf:GO:000097RNA polym42/2529    | 466/23049 | 0.928532 | 0.947885 | 0.913507 | lfi207/Arid3 |
| GO_MF_mf:GO:000154amyloid-b3/2529     | 51/23049  | 0.929172 | 0.947894 | 0.913516 | Gria1/Ldlra  |
| GO_MF_mf:GO:000098proximal pi43/2529  | 477/23049 | 0.93053  | 0.947894 | 0.913516 | lfi207/Arid3 |
| GO_MF_mf:GO:000101transcriptic1/2529  | 23/23049  | 0.931057 | 0.947894 | 0.913516 | Nr1h2        |
| GO_MF_mf:GO:003143mitogen-a1/2529     | 23/23049  | 0.931057 | 0.947894 | 0.913516 | Map4k2       |
| GO_MF_mf:GO:003037ligand-dep4/2529    | 64/23049  | 0.931135 | 0.947894 | 0.913516 | Nr1h2/Pkn    |
| GO_MF_mf:GO:000471protein ser 2/2529  | 38/23049  | 0.931518 | 0.947894 | 0.913516 | Rps6kb1/Ti   |
| GO_MF_mf:GO:001527ligand-gatr10/2529  | 134/23049 | 0.932059 | 0.947894 | 0.913516 | Chrne/Chrr   |
| GO_MF_mf:GO:002283ligand-gatr10/2529  | 134/23049 | 0.932059 | 0.947894 | 0.913516 | Chrne/Chrr   |
| GO_MF_mf:GO:003498immunoglc11/2529    | 146/23049 | 0.935198 | 0.950538 | 0.916064 | Ighv1-15/Ig  |
| GO_MF_mf:GO:001514carbohydr2/2529     | 39/23049  | 0.93772  | 0.950538 | 0.916064 | Slc2a1/Slc5  |
| GO_MF_mf:GO:001548cholesterol2/2529   | 39/23049  | 0.93772  | 0.950538 | 0.916064 | Osbpl8/Sta   |
| GO_MF_mf:GO:003226phosphatic2/2529    | 39/23049  | 0.93772  | 0.950538 | 0.916064 | Plekhf2/Wi   |
| GO_MF_mf:GO:000006fatty-acyl-1/2529   | 24/23049  | 0.938629 | 0.950538 | 0.916064 | Eci2         |
| GO_MF_mf:GO:000521structural c1/2529  | 24/23049  | 0.938629 | 0.950538 | 0.916064 | Crybb3       |
| GO_MF_mf:GO:000524voltage-ga1/2529    | 24/23049  | 0.938629 | 0.950538 | 0.916064 | Scn4a        |
| GO_MF_mf:GO:001707syntaxin-1 1/2529   | 24/23049  | 0.938629 | 0.950538 | 0.916064 | Dapk1        |
| GO_MF_mf:GO:001995chemokine 1/2529    | 24/23049  | 0.938629 | 0.950538 | 0.916064 | Ccr1         |
| GO_MF_mf:GO:000119transcriptic3/2529  | 53/23049  | 0.940069 | 0.95155  | 0.917039 | Esrrb/Hdac   |



|                   |                    |           |          |          |          |             |
|-------------------|--------------------|-----------|----------|----------|----------|-------------|
| GO_MF_m:GO:004362 | protein self4/2529 | 66/23049  | 0.940856 | 0.951899 | 0.917375 | Abcd3/Ach   |
| GO_MF_m:GO:000104 | core prom6/2529    | 91/23049  | 0.943169 | 0.953791 | 0.919199 | Arntl/Clock |
| GO_MF_m:GO:007006 | RNA polym3/2529    | 54/23049  | 0.944915 | 0.955109 | 0.920469 | Rtraf/Esrrb |
| GO_MF_m:GO:004696 | thyroid hor1/2529  | 25/23049  | 0.94537  | 0.95512  | 0.92048  | Taf11       |
| GO_MF_m:GO:004302 | cysteine-ty2/2529  | 41/23049  | 0.948559 | 0.957444 | 0.92272  | Snca/Tnfrsf |
| GO_MF_m:GO:004354 | phosphatic2/2529   | 41/23049  | 0.948559 | 0.957444 | 0.92272  | Pdgfra/Ptp  |
| GO_MF_m:GO:000532 | neurotrans1/2529   | 26/23049  | 0.95137  | 0.959384 | 0.924589 | Slc6a20a    |
| GO_MF_m:GO:001530 | anion:anion1/2529  | 26/23049  | 0.95137  | 0.959384 | 0.924589 | Slc26a7     |
| GO_MF_m:GO:001508 | sodium ion11/2529  | 153/23049 | 0.955618 | 0.963216 | 0.928282 | Atp1b2/Scn  |
| GO_MF_m:GO:000527 | sodium ch2/2529    | 43/23049  | 0.957582 | 0.964745 | 0.929756 | Scn4a/Trpr  |
| GO_MF_m:GO:006009 | molecular r13/2529 | 178/23049 | 0.961164 | 0.967754 | 0.932656 | Arrdc4/Bca  |
| GO_MF_m:GO:000830 | structural c1/2529 | 28/23049  | 0.961467 | 0.967754 | 0.932656 | Tpm4        |
| GO_MF_m:GO:003218 | ubiquitin-li5/2529 | 86/23049  | 0.966083 | 0.971946 | 0.936696 | Nploc4/Pai  |
| GO_MF_m:GO:004302 | cysteine-ty1/2529  | 30/23049  | 0.969469 | 0.974897 | 0.93954  | Snca        |
| GO_MF_m:GO:005069 | WW doma1/2529      | 31/23049  | 0.972823 | 0.977814 | 0.942351 | Tceal9      |
| GO_MF_m:GO:001529 | solute:catic6/2529 | 102/23049 | 0.973511 | 0.978049 | 0.942577 | Slc10a4/Slc |
| GO_MF_m:GO:000110 | RNA polym2/2529    | 49/23049  | 0.976428 | 0.980523 | 0.944962 | Exosc9/Lm   |
| GO_MF_m:GO:005195 | dynein ligh1/2529  | 33/23049  | 0.978467 | 0.981656 | 0.946053 | Dnah1       |
| GO_MF_m:GO:014010 | molecular r1/2529  | 33/23049  | 0.978467 | 0.981656 | 0.946053 | Zfp593      |
| GO_MF_m:GO:000113 | transcriptic1/2529 | 35/23049  | 0.982939 | 0.985225 | 0.949493 | Nr1h2       |
| GO_MF_m:GO:000480 | triglyceride1/2529 | 35/23049  | 0.982939 | 0.985225 | 0.949493 | Pnpla2      |
| GO_MF_m:GO:001677 | phosphotr1/2529    | 36/23049  | 0.984814 | 0.986645 | 0.950861 | Nme6        |
| GO_MF_m:GO:000555 | pheromon3/2529     | 90/23049  | 0.997939 | 0.99933  | 0.963086 | Mup3/Vmr    |
| GO_MF_m:GO:001650 | pheromon3/2529     | 99/23049  | 0.99914  | 0.999638 | 0.963383 | Vmn1r232/   |
| GO_MF_m:GO:000472 | protein ser1/2529  | 61/23049  | 0.999174 | 0.999638 | 0.963383 | Ppp2r1a     |
| GO_MF_m:GO:000554 | odorant bit27/2529 | 463/23049 | 0.999961 | 0.999961 | 0.963694 | Mup3/Obp    |
| GO_MF_m:GO:000104 | core prom7/451     | 91/23049  | 0.002067 | 0.181458 | 0.153718 | Atf4/Cry1/I |
| GO_MF_m:GO:000371 | transcriptic13/451 | 262/23049 | 0.002084 | 0.181458 | 0.153718 | Cebpa/Gm    |
| GO_MF_m:GO:000387 | 6-phosphc2/451     | 4/23049   | 0.002233 | 0.181458 | 0.153718 | Pfkfb2/Pkfb |
| GO_MF_m:GO:199071 | mRNA CD2/451       | 4/23049   | 0.002233 | 0.181458 | 0.153718 | Hnrnpa2b1   |
| GO_MF_m:GO:001682 | lyase activi10/451 | 178/23049 | 0.002745 | 0.181458 | 0.153718 | Aco1/Adsl/  |
| GO_MF_m:GO:001674 | transferase11/451  | 211/23049 | 0.003075 | 0.181458 | 0.153718 | Cad/Ftsj1/I |
| GO_MF_m:GO:003014 | manganes5/451      | 51/23049  | 0.003145 | 0.181458 | 0.153718 | Cdipt/Galn  |
| GO_MF_m:GO:000015 | phosphore2/451     | 5/23049   | 0.003674 | 0.181458 | 0.153718 | Kcnh2/Kcni  |
| GO_MF_m:GO:000151 | opioid pep2/451    | 5/23049   | 0.003674 | 0.181458 | 0.153718 | Penk/Pnoc   |
| GO_MF_m:GO:000433 | fructose-2,2/451   | 5/23049   | 0.003674 | 0.181458 | 0.153718 | Pfkfb2/Pkfb |
| GO_MF_m:GO:005513 | C3HC4-tyc2/451     | 5/23049   | 0.003674 | 0.181458 | 0.153718 | Kcnh2/Pink  |
| GO_MF_m:GO:000524 | voltage-ga10/451   | 187/23049 | 0.003903 | 0.181458 | 0.153718 | Cybb/Gpr8   |
| GO_MF_m:GO:002283 | voltage-ga10/451   | 187/23049 | 0.003903 | 0.181458 | 0.153718 | Cybb/Gpr8   |
| GO_MF_m:GO:004432 | ion channe8/451    | 132/23049 | 0.004512 | 0.181458 | 0.153718 | Agrn/Gpd1   |
| GO_MF_m:GO:001921 | phosphata:4/451    | 36/23049  | 0.005193 | 0.181458 | 0.153718 | Elf2/Phac   |
| GO_MF_m:GO:000371 | transcriptic18/451 | 467/23049 | 0.005195 | 0.181458 | 0.153718 | Cebpa/Cry   |
| GO_MF_m:GO:000412 | cytochrom2/451     | 6/23049   | 0.005439 | 0.181458 | 0.153718 | Cyb5r4/Cyl  |
| GO_MF_m:GO:000467 | protein hist2/451  | 6/23049   | 0.005439 | 0.181458 | 0.153718 | Kcnh2/Kcni  |
| GO_MF_m:GO:000816 | methyltran10/451   | 199/23049 | 0.006013 | 0.181458 | 0.153718 | Ftsj1/Inmt/ |
| GO_MF_m:GO:005142 | hormone r9/451     | 172/23049 | 0.006936 | 0.181458 | 0.153718 | Cry1/Hr/Ju  |
| GO_MF_m:GO:002284 | voltage-ga8/451    | 143/23049 | 0.007243 | 0.181458 | 0.153718 | Grm7/Kcne   |
| GO_MF_m:GO:000844 | phosphofru2/451    | 7/23049   | 0.007517 | 0.181458 | 0.153718 | Pfkfb2/Pkfb |

|                                     |           |          |          |          |             |
|-------------------------------------|-----------|----------|----------|----------|-------------|
| GO_MF_mzGO:001687ligase activ9/451  | 176/23049 | 0.008013 | 0.181458 | 0.153718 | Acaca/Acsl  |
| GO_MF_mzGO:003525nuclear ho18/451   | 146/23049 | 0.008168 | 0.181458 | 0.153718 | Cry1/Hr/Ju  |
| GO_MF_mzGO:000003mannosyltr3/451    | 22/23049  | 0.008692 | 0.181458 | 0.153718 | Alg9/Pigm,  |
| GO_MF_mzGO:001920carbohydrε3/451    | 22/23049  | 0.008692 | 0.181458 | 0.153718 | Pfkfb2/Pfkf |
| GO_MF_mzGO:014010catalytic ac7/451  | 119/23049 | 0.009003 | 0.181458 | 0.153718 | 2810006K2   |
| GO_MF_mzGO:000471non-memk5/451      | 66/23049  | 0.009432 | 0.181458 | 0.153718 | Csk/Dyrk1ε  |
| GO_MF_mzGO:005066coenzyme 12/451    | 281/23049 | 0.009755 | 0.181458 | 0.153718 | Acaca/Kyat  |
| GO_MF_mzGO:004239histone bin9/451   | 182/23049 | 0.009861 | 0.181458 | 0.153718 | Asf1a/Cks1  |
| GO_MF_mzGO:001671oxidoreduc2/451    | 8/23049   | 0.009893 | 0.181458 | 0.153718 | Fads1/Sc5c  |
| GO_MF_mzGO:003195medium-cl2/451     | 8/23049   | 0.009893 | 0.181458 | 0.153718 | Acsl4/Slc27 |
| GO_MF_mzGO:010239decanoate 2/451    | 8/23049   | 0.009893 | 0.181458 | 0.153718 | Acsl4/Slc27 |
| GO_MF_mzGO:001707syntaxin-1 3/451   | 24/23049  | 0.0111   | 0.181458 | 0.153718 | Snph/Stxbp  |
| GO_MF_mzGO:001990syntaxin bil6/451  | 96/23049  | 0.011477 | 0.181458 | 0.153718 | Cplx4/Hect  |
| GO_MF_mzGO:014009catalytic ac14/451 | 360/23049 | 0.011948 | 0.181458 | 0.153718 | 2810006K2   |
| GO_MF_mzGO:001642tRNA (cyto 2/451   | 9/23049   | 0.012556 | 0.181458 | 0.153718 | Ftsj1/Nsun1 |
| GO_MF_mzGO:003162opioid rece2/451   | 9/23049   | 0.012556 | 0.181458 | 0.153718 | Penk/Pnoc   |
| GO_MF_mzGO:003195very long-α2/451   | 9/23049   | 0.012556 | 0.181458 | 0.153718 | Acsl4/Slc27 |
| GO_MF_mzGO:000122transcriptic4/451  | 47/23049  | 0.013296 | 0.181458 | 0.153718 | Cdc5l/Chd1  |
| GO_MF_mzGO:003245histone der3/451   | 26/23049  | 0.013855 | 0.181458 | 0.153718 | Hr/Jmjd6/K  |
| GO_MF_mzGO:000518neuropepti3/451    | 27/23049  | 0.015364 | 0.181458 | 0.153718 | Agrp/Penk   |
| GO_MF_mzGO:005030sugar-pho:2/451    | 10/23049  | 0.015494 | 0.181458 | 0.153718 | Pfkfb2/Pfkf |
| GO_MF_mzGO:007099snRNP binc2/451    | 10/23049  | 0.015494 | 0.181458 | 0.153718 | Prpf31/Snr  |
| GO_MF_mzGO:000516transformir4/451   | 51/23049  | 0.017531 | 0.181458 | 0.153718 | Bmp4/Gdff   |
| GO_MF_mzGO:005068androgen r3/451    | 29/23049  | 0.018651 | 0.181458 | 0.153718 | Kdm3a/Rnt   |
| GO_MF_mzGO:000116tRNA polymr2/451   | 11/23049  | 0.018694 | 0.181458 | 0.153718 | Vax1/Zc3h   |
| GO_MF_mzGO:001677phosphotrε2/451    | 11/23049  | 0.018694 | 0.181458 | 0.153718 | Kcnh2/Kcni  |
| GO_MF_mzGO:001920carbohydrε2/451    | 11/23049  | 0.018694 | 0.181458 | 0.153718 | Pfkfb2/Pfkf |
| GO_MF_mzGO:004352leucine zip12/451  | 11/23049  | 0.018694 | 0.181458 | 0.153718 | Atf4/Cdc5l  |
| GO_MF_mzGO:001683hydro-lyas4/451    | 52/23049  | 0.018707 | 0.181458 | 0.153718 | Aco1/Alad,  |
| GO_MF_mzGO:000024C-5 sterol r1/451  | 1/23049   | 0.019567 | 0.181458 | 0.153718 | Sc5d        |
| GO_MF_mzGO:000169pseudophc1/451     | 1/23049   | 0.019567 | 0.181458 | 0.153718 | Sbf1        |
| GO_MF_mzGO:000388CDP-diacyl1/451    | 1/23049   | 0.019567 | 0.181458 | 0.153718 | Cdipt       |
| GO_MF_mzGO:000397RNA ligase 1/451   | 1/23049   | 0.019567 | 0.181458 | 0.153718 | Rtcb        |
| GO_MF_mzGO:000401N6-(1,2-di1/451    | 1/23049   | 0.019567 | 0.181458 | 0.153718 | Adsl        |
| GO_MF_mzGO:000458ornithine-c1/451   | 1/23049   | 0.019567 | 0.181458 | 0.153718 | Oat         |
| GO_MF_mzGO:000465porphobilir1/451   | 1/23049   | 0.019567 | 0.181458 | 0.153718 | Alad        |
| GO_MF_mzGO:000479thioether S1/451   | 1/23049   | 0.019567 | 0.181458 | 0.153718 | Inmt        |
| GO_MF_mzGO:000485xylulokinas1/451   | 1/23049   | 0.019567 | 0.181458 | 0.153718 | Xylb        |
| GO_MF_mzGO:000512granulocyti1/451   | 1/23049   | 0.019567 | 0.181458 | 0.153718 | Csf2        |
| GO_MF_mzGO:000811sphingenin1/451    | 1/23049   | 0.019567 | 0.181458 | 0.153718 | Sgpl1       |
| GO_MF_mzGO:000845RNA ligase 1/451   | 1/23049   | 0.019567 | 0.181458 | 0.153718 | Rtcb        |
| GO_MF_mzGO:000847isovaleryl-(1/451  | 1/23049   | 0.019567 | 0.181458 | 0.153718 | lvd         |
| GO_MF_mzGO:000849protoheme1/451     | 1/23049   | 0.019567 | 0.181458 | 0.153718 | Cox10       |
| GO_MF_mzGO:000902tRNA (guar1/451    | 1/23049   | 0.019567 | 0.181458 | 0.153718 | Ftsj1       |
| GO_MF_mzGO:001085adenylate c1/451   | 1/23049   | 0.019567 | 0.181458 | 0.153718 | Grm7        |
| GO_MF_mzGO:001085adenylate c1/451   | 1/23049   | 0.019567 | 0.181458 | 0.153718 | Grm7        |
| GO_MF_mzGO:001519L-tryptoph1/451    | 1/23049   | 0.019567 | 0.181458 | 0.153718 | Slc36a4     |
| GO_MF_mzGO:001621linoleoyl-C1/451   | 1/23049   | 0.019567 | 0.181458 | 0.153718 | Fads1       |

|                                      |           |          |          |          |             |
|--------------------------------------|-----------|----------|----------|----------|-------------|
| GO_MF_mzGO:001651interleukin·1/451   | 1/23049   | 0.019567 | 0.181458 | 0.153718 | Il12rb1     |
| GO_MF_mzGO:003074amine N-nr1/451     | 1/23049   | 0.019567 | 0.181458 | 0.153718 | Inmt        |
| GO_MF_mzGO:003374histone der1/451    | 1/23049   | 0.019567 | 0.181458 | 0.153718 | Jmjd6       |
| GO_MF_mzGO:003374histone der1/451    | 1/23049   | 0.019567 | 0.181458 | 0.153718 | Jmjd6       |
| GO_MF_mzGO:003387[heparan sr1/451    | 1/23049   | 0.019567 | 0.181458 | 0.153718 | Hs3st3b1    |
| GO_MF_mzGO:004454GTP cycloh1/451     | 1/23049   | 0.019567 | 0.181458 | 0.153718 | Gchfr       |
| GO_MF_mzGO:004699oxidoreduc1/451     | 1/23049   | 0.019567 | 0.181458 | 0.153718 | Sc5d        |
| GO_MF_mzGO:004712thiomorph1/451      | 1/23049   | 0.019567 | 0.181458 | 0.153718 | Crym        |
| GO_MF_mzGO:004731kynurenine1/451     | 1/23049   | 0.019567 | 0.181458 | 0.153718 | Kyat3       |
| GO_MF_mzGO:004767arachidona1/451     | 1/23049   | 0.019567 | 0.181458 | 0.153718 | Acsl4       |
| GO_MF_mzGO:00478C cysteamine1/451    | 1/23049   | 0.019567 | 0.181458 | 0.153718 | Ado         |
| GO_MF_mzGO:005004lathosterol 1/451   | 1/23049   | 0.019567 | 0.181458 | 0.153718 | Sc5d        |
| GO_MF_mzGO:005019phytanate-1/451     | 1/23049   | 0.019567 | 0.181458 | 0.153718 | Slc27a2     |
| GO_MF_mzGO:005266tRNA (cyto 1/451    | 1/23049   | 0.019567 | 0.181458 | 0.153718 | Ftsj1       |
| GO_MF_mzGO:005291dol-P-Mar 1/451     | 1/23049   | 0.019567 | 0.181458 | 0.153718 | Alg9        |
| GO_MF_mzGO:005292dol-P-Mar 1/451     | 1/23049   | 0.019567 | 0.181458 | 0.153718 | Alg9        |
| GO_MF_mzGO:007025pristanate-1/451    | 1/23049   | 0.019567 | 0.181458 | 0.153718 | Slc27a2     |
| GO_MF_mzGO:007062(S)-2-(5-ar1/451    | 1/23049   | 0.019567 | 0.181458 | 0.153718 | Adsl        |
| GO_MF_mzGO:00707C sterol desa 1/451  | 1/23049   | 0.019567 | 0.181458 | 0.153718 | Sc5d        |
| GO_MF_mzGO:007171para-amin1/451      | 1/23049   | 0.019567 | 0.181458 | 0.153718 | Pm20d2      |
| GO_MF_mzGO:007257poly-ADP-1/451      | 1/23049   | 0.019567 | 0.181458 | 0.153718 | Rnf146      |
| GO_MF_mzGO:008004GDP-D-glu1/451      | 1/23049   | 0.019567 | 0.181458 | 0.153718 | Gdpgp1      |
| GO_MF_mzGO:009737NAD-depe1/451       | 1/23049   | 0.019567 | 0.181458 | 0.153718 | Sirt7       |
| GO_MF_mzGO:010605tRNA 2'-O-1/451     | 1/23049   | 0.019567 | 0.181458 | 0.153718 | Ftsj1       |
| GO_MF_mzGO:199044U2 snRNP l1/451     | 1/23049   | 0.019567 | 0.181458 | 0.153718 | Snrpb       |
| GO_MF_mzGO:0001732'-5'-oligo 2/451   | 12/23049  | 0.022146 | 0.197075 | 0.166947 | Oas1b/Oas   |
| GO_MF_mzGO:001716vinculin bir 2/451  | 12/23049  | 0.022146 | 0.197075 | 0.166947 | Nrap/Rtcb   |
| GO_MF_mzGO:003245histone der2/451    | 12/23049  | 0.022146 | 0.197075 | 0.166947 | Hr/Kdm3a    |
| GO_MF_mzGO:00397C co-receptc 2/451   | 12/23049  | 0.022146 | 0.197075 | 0.166947 | Bmp4/Dkk    |
| GO_MF_mzGO:003254ribonucleo:13/451   | 354/23049 | 0.022938 | 0.202082 | 0.171188 | Arl15/Cad/  |
| GO_MF_mzGO:003162ubiquitin p 12/451  | 322/23049 | 0.025527 | 0.216079 | 0.183046 | Arrdc1/Der  |
| GO_MF_mzGO:0004113',5'-cyclic·2/451  | 13/23049  | 0.025838 | 0.216079 | 0.183046 | Pde1a/Pde   |
| GO_MF_mzGO:000446long-chain 2/451    | 13/23049  | 0.025838 | 0.216079 | 0.183046 | Acsl4/Slc27 |
| GO_MF_mzGO:001564toxic subst:2/451   | 13/23049  | 0.025838 | 0.216079 | 0.183046 | Gucy2c/Ph   |
| GO_MF_mzGO:001665oxidoreduc 2/451    | 13/23049  | 0.025838 | 0.216079 | 0.183046 | Cyb5r4/Cyl  |
| GO_MF_mzGO:000486protein phr3/451    | 33/23049  | 0.026303 | 0.216079 | 0.183046 | Elf2/Phact  |
| GO_MF_mzGO:000875S-adenosy 7/451     | 148/23049 | 0.026715 | 0.216079 | 0.183046 | Ftsj1/Inmt/ |
| GO_MF_mzGO:003218ubiquitin-li5/451   | 86/23049  | 0.026856 | 0.216079 | 0.183046 | Cks1b/Nbr   |
| GO_MF_mzGO:000512cytokine re 12/451  | 325/23049 | 0.02716  | 0.216079 | 0.183046 | Angpt4/Br   |
| GO_MF_mzGO:000188nucleoside 13/451   | 364/23049 | 0.027921 | 0.216079 | 0.183046 | Arl15/Cad/  |
| GO_MF_mzGO:001517neutral am 3/451    | 34/23049  | 0.028441 | 0.216079 | 0.183046 | Slc25a38/S  |
| GO_MF_mzGO:003256guanyl ribc 13/451  | 366/23049 | 0.029006 | 0.216079 | 0.183046 | Arl15/Eif5/ |
| GO_MF_mzGO:00190C guanyl nuc 13/451  | 367/23049 | 0.02956  | 0.216079 | 0.183046 | Arl15/Eif5/ |
| GO_MF_mzGO:000033RNA cap b 2/451     | 14/23049  | 0.02976  | 0.216079 | 0.183046 | Eif4g3/Ncb  |
| GO_MF_mzGO:000116intrinsic tra 2/451 | 14/23049  | 0.02976  | 0.216079 | 0.183046 | Vax1/Zc3h   |
| GO_MF_mzGO:001659glutamate 2/451     | 14/23049  | 0.02976  | 0.216079 | 0.183046 | Glul/Grm7   |
| GO_MF_mzGO:000817RNA methy4/451      | 60/23049  | 0.029865 | 0.216079 | 0.183046 | Ftsj1/Mettl |
| GO_MF_mzGO:000471protein tyr7/451    | 152/23049 | 0.030287 | 0.216079 | 0.183046 | Clk1/Csk/D  |

|                                      |           |          |          |          |              |
|--------------------------------------|-----------|----------|----------|----------|--------------|
| GO_MF_mzGO:001683 carbon-oxyl4/451   | 61/23049  | 0.031484 | 0.216079 | 0.183046 | Aco1/Alad    |
| GO_MF_mzGO:000524 voltage-ga5/451    | 91/23049  | 0.033175 | 0.216079 | 0.183046 | Kcne4/Kcnq   |
| GO_MF_mzGO:003054 acetylcholin2/451  | 15/23049  | 0.033901 | 0.216079 | 0.183046 | Agrn/Lypd    |
| GO_MF_mzGO:003218 SUMO binc2/451     | 15/23049  | 0.033901 | 0.216079 | 0.183046 | Tollip/Zcch  |
| GO_MF_mzGO:003423 protein kin2/451   | 15/23049  | 0.033901 | 0.216079 | 0.183046 | Csk/Prkar1   |
| GO_MF_mzGO:004421 intronic tra2/451  | 15/23049  | 0.033901 | 0.216079 | 0.183046 | Vax1/Zc3h    |
| GO_MF_mzGO:009960 neurotrans2/451    | 15/23049  | 0.033901 | 0.216079 | 0.183046 | Agrn/Lypd    |
| GO_MF_mzGO:004438 ubiquitin-li12/451 | 337/23049 | 0.034455 | 0.216079 | 0.183046 | Arrdc1/Der   |
| GO_MF_mzGO:003149 chromatin5/451     | 92/23049  | 0.03454  | 0.216079 | 0.183046 | H3f3b/Hr1    |
| GO_MF_mzGO:000104 core promc7/451    | 157/23049 | 0.035186 | 0.216079 | 0.183046 | Atf4/Cry1/I  |
| GO_MF_mzGO:000097 RNA polyn3/451     | 37/23049  | 0.035388 | 0.216079 | 0.183046 | H3f3b/Kdn    |
| GO_MF_mzGO:000372 mRNA binc9/451     | 228/23049 | 0.036157 | 0.216079 | 0.183046 | Aco1/Elavl   |
| GO_MF_mzGO:000471 protein ser3/451   | 38/23049  | 0.03788  | 0.216079 | 0.183046 | Aurkb/Clk1   |
| GO_MF_mzGO:199038 ubiquitin-s2/451   | 16/23049  | 0.038251 | 0.216079 | 0.183046 | Chmp3/De     |
| GO_MF_mzGO:000382 alpha-1,3-1/451    | 2/23049   | 0.038752 | 0.216079 | 0.183046 | Mgat1        |
| GO_MF_mzGO:000398 acetyl-CoA1/451    | 2/23049   | 0.038752 | 0.216079 | 0.183046 | Acaca        |
| GO_MF_mzGO:000399 aconitate h1/451   | 2/23049   | 0.038752 | 0.216079 | 0.183046 | Aco1         |
| GO_MF_mzGO:000407 aspartate c1/451   | 2/23049   | 0.038752 | 0.216079 | 0.183046 | Cad          |
| GO_MF_mzGO:000407 biotin carb1/451   | 2/23049   | 0.038752 | 0.216079 | 0.183046 | Acaca        |
| GO_MF_mzGO:000408 carbamoyl-1/451    | 2/23049   | 0.038752 | 0.216079 | 0.183046 | Cad          |
| GO_MF_mzGO:000408 carbamoyl-1/451    | 2/23049   | 0.038752 | 0.216079 | 0.183046 | Cad          |
| GO_MF_mzGO:000415 dihydroorc1/451    | 2/23049   | 0.038752 | 0.216079 | 0.183046 | Cad          |
| GO_MF_mzGO:000434 glucosylcer1/451   | 2/23049   | 0.038752 | 0.216079 | 0.183046 | Gba2         |
| GO_MF_mzGO:000435 glutamate-1/451    | 2/23049   | 0.038752 | 0.216079 | 0.183046 | Glul         |
| GO_MF_mzGO:000441 hydroxyme1/451     | 2/23049   | 0.038752 | 0.216079 | 0.183046 | Hmgcl        |
| GO_MF_mzGO:000481 glutamate-1/451    | 2/23049   | 0.038752 | 0.216079 | 0.183046 | Eprs         |
| GO_MF_mzGO:000483 tryptophan1/451    | 2/23049   | 0.038752 | 0.216079 | 0.183046 | Wars2        |
| GO_MF_mzGO:000491 interleukin-1/451  | 2/23049   | 0.038752 | 0.216079 | 0.183046 | Cxcr1        |
| GO_MF_mzGO:000505 peroxisomc1/451    | 2/23049   | 0.038752 | 0.216079 | 0.183046 | Pex5l        |
| GO_MF_mzGO:000515 interleukin-1/451  | 2/23049   | 0.038752 | 0.216079 | 0.183046 | Tollip       |
| GO_MF_mzGO:000812 4-alpha-hy1/451    | 2/23049   | 0.038752 | 0.216079 | 0.183046 | Pcbd1        |
| GO_MF_mzGO:001517 aromatic al1/451   | 2/23049   | 0.038752 | 0.216079 | 0.183046 | Slc36a4      |
| GO_MF_mzGO:001615 translation1/451   | 2/23049   | 0.038752 | 0.216079 | 0.183046 | 2810006K2    |
| GO_MF_mzGO:001621 ammonia li1/451    | 2/23049   | 0.038752 | 0.216079 | 0.183046 | Glul         |
| GO_MF_mzGO:001663 oxidoreduc1/451    | 2/23049   | 0.038752 | 0.216079 | 0.183046 | Crym         |
| GO_MF_mzGO:004201 interleukin-1/451  | 2/23049   | 0.038752 | 0.216079 | 0.183046 | Il12rb1      |
| GO_MF_mzGO:004202 interleukin-1/451  | 2/23049   | 0.038752 | 0.216079 | 0.183046 | Il12rb1      |
| GO_MF_mzGO:004780 cysteine-S-1/451   | 2/23049   | 0.038752 | 0.216079 | 0.183046 | Kyat3        |
| GO_MF_mzGO:007116 RNA trimet1/451    | 2/23049   | 0.038752 | 0.216079 | 0.183046 | Tgs1         |
| GO_MF_mzGO:190485 proteasom1/451     | 2/23049   | 0.038752 | 0.216079 | 0.183046 | Alad         |
| GO_MF_mzGO:000552 GTP bindin12/451   | 344/23049 | 0.039304 | 0.217781 | 0.184488 | Arl15/Eif5/I |
| GO_MF_mzGO:002283 ion gated c11/451  | 307/23049 | 0.0402   | 0.220742 | 0.186996 | Cybb/Gpr8    |
| GO_MF_mzGO:003097 receptor ty4/451   | 66/23049  | 0.04034  | 0.220742 | 0.186996 | Angpt4/Fiz   |
| GO_MF_mzGO:004313 ubiquitin b4/451   | 67/23049  | 0.042264 | 0.226151 | 0.191578 | Cks1b/Nbr    |
| GO_MF_mzGO:002283 gated chan11/451   | 310/23049 | 0.042605 | 0.226151 | 0.191578 | Cybb/Gpr8    |
| GO_MF_mzGO:003027 LRR domai2/451     | 17/23049  | 0.042801 | 0.226151 | 0.191578 | Atf4/Cdc5I   |
| GO_MF_mzGO:000517 hormone a6/451     | 130/23049 | 0.042841 | 0.226151 | 0.191578 | Agrp/Erfe/I  |
| GO_MF_mzGO:003255 purine ribo12/451  | 349/23049 | 0.043049 | 0.226151 | 0.191578 | Arl15/Eif5/I |

|                                |         |           |          |          |          |             |
|--------------------------------|---------|-----------|----------|----------|----------|-------------|
| GO_MF_mzGO:001706snRNA bin     | 3/451   | 40/23049  | 0.043125 | 0.226151 | 0.191578 | Ncbp2/Prp   |
| GO_MF_mzGO:003245demethyla     | 3/451   | 40/23049  | 0.043125 | 0.226151 | 0.191578 | Hr/Jmjd6/k  |
| GO_MF_mzGO:000188purine nucl   | 12/451  | 353/23049 | 0.046219 | 0.236525 | 0.200366 | Arl15/Eif5/ |
| GO_MF_mzGO:000373mRNA 3'-L     | 4/451   | 69/23049  | 0.046266 | 0.236525 | 0.200366 | Elavl1/Hnrr |
| GO_MF_mzGO:000014SNARE bin     | 6/451   | 133/23049 | 0.046968 | 0.236525 | 0.200366 | Cplx4/Hect  |
| GO_MF_mzGO:001990phosphata     | 8/451   | 203/23049 | 0.046984 | 0.236525 | 0.200366 | Cdc5l/Cry1  |
| GO_MF_mzGO:001659amino acid    | 4/451   | 71/23049  | 0.050471 | 0.236525 | 0.200366 | Cad/Gchfr/  |
| GO_MF_mzGO:000122transcripti   | 2/451   | 19/23049  | 0.052463 | 0.236525 | 0.200366 | Cdc5l/Six3  |
| GO_MF_mzGO:001564fatty acid li | 2/451   | 19/23049  | 0.052463 | 0.236525 | 0.200366 | Acsl4/Slc27 |
| GO_MF_mzGO:004327phospholip    | 2/451   | 19/23049  | 0.052463 | 0.236525 | 0.200366 | Sele/Stxbp  |
| GO_MF_mzGO:000815protein ph    | 2/451   | 20/23049  | 0.057556 | 0.236525 | 0.200366 | Cdc5l/Phac  |
| GO_MF_mzGO:007006proline-ricl  | 2/451   | 20/23049  | 0.057556 | 0.236525 | 0.200366 | Csk/Wbp4    |
| GO_MF_mzGO:000002alpha-1,2-    | 1/451   | 3/23049   | 0.057562 | 0.236525 | 0.200366 | Alg9        |
| GO_MF_mzGO:000411calmodulin    | 1/451   | 3/23049   | 0.057562 | 0.236525 | 0.200366 | Pde1a       |
| GO_MF_mzGO:000435glutamate     | 1/451   | 3/23049   | 0.057562 | 0.236525 | 0.200366 | Glul        |
| GO_MF_mzGO:000450phenylalan    | 1/451   | 3/23049   | 0.057562 | 0.236525 | 0.200366 | Pcbd1       |
| GO_MF_mzGO:0004535'-3' exorik  | 1/451   | 3/23049   | 0.057562 | 0.236525 | 0.200366 | Xrn1        |
| GO_MF_mzGO:000472magnesium     | 1/451   | 3/23049   | 0.057562 | 0.236525 | 0.200366 | Pdp1        |
| GO_MF_mzGO:000474[pyruvate c   | 1/451   | 3/23049   | 0.057562 | 0.236525 | 0.200366 | Pdp1        |
| GO_MF_mzGO:000482proline-tR    | 1/451   | 3/23049   | 0.057562 | 0.236525 | 0.200366 | Eprs        |
| GO_MF_mzGO:0008263-oxoacid     | 1/451   | 3/23049   | 0.057562 | 0.236525 | 0.200366 | Oxct1       |
| GO_MF_mzGO:000844N-acetylgl    | 1/451   | 3/23049   | 0.057562 | 0.236525 | 0.200366 | Sulf2       |
| GO_MF_mzGO:000850sucrose:prc   | 1/451   | 3/23049   | 0.057562 | 0.236525 | 0.200366 | Slc45a4     |
| GO_MF_mzGO:000851sucrose tra   | 1/451   | 3/23049   | 0.057562 | 0.236525 | 0.200366 | Slc45a4     |
| GO_MF_mzGO:000966sucrose:cat   | 1/451   | 3/23049   | 0.057562 | 0.236525 | 0.200366 | Slc45a4     |
| GO_MF_mzGO:001515disaccharic   | 1/451   | 3/23049   | 0.057562 | 0.236525 | 0.200366 | Slc45a4     |
| GO_MF_mzGO:001515oligosacch    | 1/451   | 3/23049   | 0.057562 | 0.236525 | 0.200366 | Slc45a4     |
| GO_MF_mzGO:001642mRNA (2'-     | 1/451   | 3/23049   | 0.057562 | 0.236525 | 0.200366 | Mettl14     |
| GO_MF_mzGO:001674carboxyl-     | c1/451  | 3/23049   | 0.057562 | 0.236525 | 0.200366 | Cad         |
| GO_MF_mzGO:001707oxidative p   | 1/451   | 3/23049   | 0.057562 | 0.236525 | 0.200366 | Ucp2        |
| GO_MF_mzGO:001986IgA bindin    | c1/451  | 3/23049   | 0.057562 | 0.236525 | 0.200366 | Ambp        |
| GO_MF_mzGO:001995interleukin   | 1/451   | 3/23049   | 0.057562 | 0.236525 | 0.200366 | Cxcr1       |
| GO_MF_mzGO:003035iron-respo    | 1/451   | 3/23049   | 0.057562 | 0.236525 | 0.200366 | Aco1        |
| GO_MF_mzGO:003062U4atac snR    | 1/451   | 3/23049   | 0.057562 | 0.236525 | 0.200366 | Prpf31      |
| GO_MF_mzGO:003153thyrotropir   | 1/451   | 3/23049   | 0.057562 | 0.236525 | 0.200366 | Psmc5       |
| GO_MF_mzGO:003221riboflavin t  | 1/451   | 3/23049   | 0.057562 | 0.236525 | 0.200366 | Slc52a3     |
| GO_MF_mzGO:003374L-methioni    | 1/451   | 3/23049   | 0.057562 | 0.236525 | 0.200366 | Msrb3       |
| GO_MF_mzGO:003382O-fucosyl     | c1/451  | 3/23049   | 0.057562 | 0.236525 | 0.200366 | Lfng        |
| GO_MF_mzGO:003473histone de    | c1/451  | 3/23049   | 0.057562 | 0.236525 | 0.200366 | Sirt7       |
| GO_MF_mzGO:0043423-phosphc     | 1/451   | 3/23049   | 0.057562 | 0.236525 | 0.200366 | Ptk2b       |
| GO_MF_mzGO:004775chondroitir   | 1/451   | 3/23049   | 0.057562 | 0.236525 | 0.200366 | Chst12      |
| GO_MF_mzGO:004810calcium-      | ai1/451 | 3/23049   | 0.057562 | 0.236525 | 0.200366 | Pde1a       |
| GO_MF_mzGO:004840epidermal     | i1/451  | 3/23049   | 0.057562 | 0.236525 | 0.200366 | Shc1        |
| GO_MF_mzGO:0051533 iron, 4 su  | 1/451   | 3/23049   | 0.057562 | 0.236525 | 0.200366 | Aco1        |
| GO_MF_mzGO:007090serine bind   | 1/451   | 3/23049   | 0.057562 | 0.236525 | 0.200366 | Grm7        |
| GO_MF_mzGO:007120histone pre   | c1/451  | 3/23049   | 0.057562 | 0.236525 | 0.200366 | Snrpb       |
| GO_MF_mzGO:199075protein bin   | 1/451   | 3/23049   | 0.057562 | 0.236525 | 0.200366 | Arrdc1      |
| GO_MF_mzGO:000481aminoacyl-    | 3/451   | 45/23049  | 0.057722 | 0.236525 | 0.200366 | Eprs/Farsa/ |

|                                     |           |          |          |          |             |
|-------------------------------------|-----------|----------|----------|----------|-------------|
| GO_MF_mzGO:001687ligase activ3/451  | 45/23049  | 0.057722 | 0.236525 | 0.200366 | Eprs/Farsa/ |
| GO_MF_mzGO:00167εtransferase4/451   | 75/23049  | 0.059487 | 0.242629 | 0.205537 | Chst12/Chs  |
| GO_MF_mzGO:00314C carboxylic :8/451 | 214/23049 | 0.060308 | 0.244843 | 0.207412 | Acaca/Cad.  |
| GO_MF_mzGO:199084promoter-:3/451    | 46/23049  | 0.060887 | 0.246062 | 0.208445 | Chd7/Foxo   |
| GO_MF_mzGO:004317organic aci8/451   | 219/23049 | 0.067076 | 0.269833 | 0.228582 | Acaca/Cad.  |
| GO_MF_mzGO:00080εgrowth fac6/451    | 146/23049 | 0.067625 | 0.270003 | 0.228726 | Bmp4/Csf2   |
| GO_MF_mzGO:00084εtransamina2/451    | 22/23049  | 0.068225 | 0.270003 | 0.228726 | Kyat3/Oat   |
| GO_MF_mzGO:00192C phosphata:4/451   | 79/23049  | 0.0693   | 0.270003 | 0.228726 | Elfn2/Phact |
| GO_MF_mzGO:001517amino acid4/451    | 80/23049  | 0.071876 | 0.270003 | 0.228726 | Slc6a21/Slc |
| GO_MF_mzGO:00164C CoA-ligase2/451   | 23/23049  | 0.073784 | 0.270003 | 0.228726 | Acs14/Slc27 |
| GO_MF_mzGO:001687ligase activ3/451  | 50/23049  | 0.074331 | 0.270003 | 0.228726 | Acaca/Cad.  |
| GO_MF_mzGO:19907εprotein tyr4/451   | 81/23049  | 0.0745   | 0.270003 | 0.228726 | Angpt4/Fiz  |
| GO_MF_mzGO:00002εferric-chelε1/451  | 4/23049   | 0.076005 | 0.270003 | 0.228726 | Cybrd1      |
| GO_MF_mzGO:000164group III m1/451   | 4/23049   | 0.076005 | 0.270003 | 0.228726 | Grm7        |
| GO_MF_mzGO:00021εUTP bindin1/451    | 4/23049   | 0.076005 | 0.270003 | 0.228726 | Cad         |
| GO_MF_mzGO:00039εacetyl-CoA1/451    | 4/23049   | 0.076005 | 0.270003 | 0.228726 | Acat2       |
| GO_MF_mzGO:00040εarylsulfatas1/451  | 4/23049   | 0.076005 | 0.270003 | 0.228726 | Sulf2       |
| GO_MF_mzGO:00041εcytidylate k1/451  | 4/23049   | 0.076005 | 0.270003 | 0.228726 | Ak8         |
| GO_MF_mzGO:00043εglycerol-3-1/451   | 4/23049   | 0.076005 | 0.270003 | 0.228726 | Gpd11       |
| GO_MF_mzGO:00050C transmemk1/451    | 4/23049   | 0.076005 | 0.270003 | 0.228726 | Ptprm       |
| GO_MF_mzGO:00085C melatonin i1/451  | 4/23049   | 0.076005 | 0.270003 | 0.228726 | Gpr50       |
| GO_MF_mzGO:000937biotin bind1/451   | 4/23049   | 0.076005 | 0.270003 | 0.228726 | Acaca       |
| GO_MF_mzGO:001621kynurenine1/451    | 4/23049   | 0.076005 | 0.270003 | 0.228726 | Kyat3       |
| GO_MF_mzGO:00168εacid-ammε1/451     | 4/23049   | 0.076005 | 0.270003 | 0.228726 | Glul        |
| GO_MF_mzGO:00191εtransmemk1/451     | 4/23049   | 0.076005 | 0.270003 | 0.228726 | Ptprm       |
| GO_MF_mzGO:00302εtransmemk1/451     | 4/23049   | 0.076005 | 0.270003 | 0.228726 | Angpt4      |
| GO_MF_mzGO:003094mitochond1/451     | 4/23049   | 0.076005 | 0.270003 | 0.228726 | Tomm20      |
| GO_MF_mzGO:00316εbeta-1 adr1/451    | 4/23049   | 0.076005 | 0.270003 | 0.228726 | Sh3gl1      |
| GO_MF_mzGO:00325εpyrimidine 1/451   | 4/23049   | 0.076005 | 0.270003 | 0.228726 | Cad         |
| GO_MF_mzGO:00325εdATP bindi1/451    | 4/23049   | 0.076005 | 0.270003 | 0.228726 | Hist1h1e    |
| GO_MF_mzGO:003374peptide-m1/451     | 4/23049   | 0.076005 | 0.270003 | 0.228726 | Msrb3       |
| GO_MF_mzGO:00361εkynurenine1/451    | 4/23049   | 0.076005 | 0.270003 | 0.228726 | Kyat3       |
| GO_MF_mzGO:00526εphosphatic1/451    | 4/23049   | 0.076005 | 0.270003 | 0.228726 | Mtmr2       |
| GO_MF_mzGO:007081peptidyl-ly1/451   | 4/23049   | 0.076005 | 0.270003 | 0.228726 | Jmjd6       |
| GO_MF_mzGO:003017pyridoxal p3/451   | 51/23049  | 0.077881 | 0.275554 | 0.233428 | Kyat3/Oat/  |
| GO_MF_mzGO:0004113',5'-cyclic:2/451 | 24/23049  | 0.079483 | 0.276777 | 0.234464 | Pde1a/Pde   |
| GO_MF_mzGO:00167εtransferase2/451   | 24/23049  | 0.079483 | 0.276777 | 0.234464 | Kyat3/Oat   |
| GO_MF_mzGO:00433εphosphatic2/451    | 24/23049  | 0.079483 | 0.276777 | 0.234464 | Arap3/Myc   |
| GO_MF_mzGO:00528εphosphatic2/451    | 24/23049  | 0.079483 | 0.276777 | 0.234464 | Mtmr2/Mtr   |
| GO_MF_mzGO:00506εflavin aden4/451   | 83/23049  | 0.079891 | 0.277104 | 0.234741 | Cyb5r4/Cyl  |
| GO_MF_mzGO:007027vitamin B6 3/451   | 52/23049  | 0.081504 | 0.280989 | 0.238033 | Kyat3/Oat/  |
| GO_MF_mzGO:00352εsteroid hor4/451   | 84/23049  | 0.082658 | 0.280989 | 0.238033 | Kdm3a/Nrε   |
| GO_MF_mzGO:00168εcarbon-car3/451    | 53/23049  | 0.085198 | 0.280989 | 0.238033 | Glul/Hmgc   |
| GO_MF_mzGO:000411cyclic-nuclε2/451  | 25/23049  | 0.085313 | 0.280989 | 0.238033 | Pde1a/Pde   |
| GO_MF_mzGO:003517histone ser2/451   | 25/23049  | 0.085313 | 0.280989 | 0.238033 | Aurkb/Stk-  |
| GO_MF_mzGO:00469εthyroid hor2/451   | 25/23049  | 0.085313 | 0.280989 | 0.238033 | Hr/Thrap3   |
| GO_MF_mzGO:00166εoxidoreduc4/451    | 86/23049  | 0.08833  | 0.280989 | 0.238033 | Cyb5r4/Cyl  |
| GO_MF_mzGO:00041εaspartic-ty2/451   | 26/23049  | 0.091268 | 0.280989 | 0.238033 | Bace1/Cyrr  |

|                                       |           |          |          |          |             |
|---------------------------------------|-----------|----------|----------|----------|-------------|
| GO_MF_mzGO:001687acid-thiol l 2/451   | 26/23049  | 0.091268 | 0.280989 | 0.238033 | Acsl4/Slc27 |
| GO_MF_mzGO:007194FAD bindin 2/451     | 26/23049  | 0.091268 | 0.280989 | 0.238033 | Cyb5r4/Cyl  |
| GO_MF_mzGO:000814sulfotransfε 3/451   | 55/23049  | 0.092796 | 0.280989 | 0.238033 | Chst12/Chs  |
| GO_MF_mzGO:00002ε peroxisomε 1/451    | 5/23049   | 0.094088 | 0.280989 | 0.238033 | Pex5l       |
| GO_MF_mzGO:00010ε regulatory 1/451    | 5/23049   | 0.094088 | 0.280989 | 0.238033 | Hnrnpa2b1   |
| GO_MF_mzGO:00018ε pyrimidine 1/451    | 5/23049   | 0.094088 | 0.280989 | 0.238033 | Cad         |
| GO_MF_mzGO:000404aminoacyl- 1/451     | 5/23049   | 0.094088 | 0.280989 | 0.238033 | 2810006K2   |
| GO_MF_mzGO:00041ε dolichyl-pt 1/451   | 5/23049   | 0.094088 | 0.280989 | 0.238033 | Sdf2        |
| GO_MF_mzGO:000431farnesyltrar 1/451   | 5/23049   | 0.094088 | 0.280989 | 0.238033 | Cox10       |
| GO_MF_mzGO:000464phosphory 1/451      | 5/23049   | 0.094088 | 0.280989 | 0.238033 | Gdpgp1      |
| GO_MF_mzGO:000482 phenylalan 1/451    | 5/23049   | 0.094088 | 0.280989 | 0.238033 | Farsa       |
| GO_MF_mzGO:000492 interleukin- 1/451  | 5/23049   | 0.094088 | 0.280989 | 0.238033 | Il10rb      |
| GO_MF_mzGO:000514 interleukin- 1/451  | 5/23049   | 0.094088 | 0.280989 | 0.238033 | Il12rb1     |
| GO_MF_mzGO:000841 CoA-transf 1/451    | 5/23049   | 0.094088 | 0.280989 | 0.238033 | Oxct1       |
| GO_MF_mzGO:000842 beta-glucc 1/451    | 5/23049   | 0.094088 | 0.280989 | 0.238033 | Gba2        |
| GO_MF_mzGO:00084ε [heparan st 1/451   | 5/23049   | 0.094088 | 0.280989 | 0.238033 | Hs3st3b1    |
| GO_MF_mzGO:000937 four-way jct 1/451  | 5/23049   | 0.094088 | 0.280989 | 0.238033 | Recql       |
| GO_MF_mzGO:001631 inositol bis 1/451  | 5/23049   | 0.094088 | 0.280989 | 0.238033 | Mtmr7       |
| GO_MF_mzGO:00164ε C-acetyltra 1/451   | 5/23049   | 0.094088 | 0.280989 | 0.238033 | Acat2       |
| GO_MF_mzGO:00168ε oxo-acid-l 1/451    | 5/23049   | 0.094088 | 0.280989 | 0.238033 | Hmgcl       |
| GO_MF_mzGO:00302ε protein tyr 1/451   | 5/23049   | 0.094088 | 0.280989 | 0.238033 | Rack1       |
| GO_MF_mzGO:003062 U4 snRNA 1/451      | 5/23049   | 0.094088 | 0.280989 | 0.238033 | Prpf31      |
| GO_MF_mzGO:00325ε pyrimidine 1/451    | 5/23049   | 0.094088 | 0.280989 | 0.238033 | Cad         |
| GO_MF_mzGO:00325ε adenyl deo 1/451    | 5/23049   | 0.094088 | 0.280989 | 0.238033 | Hist1h1e    |
| GO_MF_mzGO:00344ε chondroitir 1/451   | 5/23049   | 0.094088 | 0.280989 | 0.238033 | Chst12      |
| GO_MF_mzGO:00420ε ATPase inh 1/451    | 5/23049   | 0.094088 | 0.280989 | 0.238033 | Agrn        |
| GO_MF_mzGO:00484ε Roundabot 1/451     | 5/23049   | 0.094088 | 0.280989 | 0.238033 | Tgfb1i1     |
| GO_MF_mzGO:006157 cyclin-dep 1/451    | 5/23049   | 0.094088 | 0.280989 | 0.238033 | Cks1b       |
| GO_MF_mzGO:00700ε chromo sh 1/451     | 5/23049   | 0.094088 | 0.280989 | 0.238033 | Chaf1a      |
| GO_MF_mzGO:007107 eukaryotic 1/451    | 5/23049   | 0.094088 | 0.280989 | 0.238033 | Eif5        |
| GO_MF_mzGO:00719ε WD40-rep 1/451      | 5/23049   | 0.094088 | 0.280989 | 0.238033 | Cdc5l       |
| GO_MF_mzGO:010601 phosphatic 1/451    | 5/23049   | 0.094088 | 0.280989 | 0.238033 | Mtmr2       |
| GO_MF_mzGO:19022ε voltage-ga 1/451    | 5/23049   | 0.094088 | 0.280989 | 0.238033 | Kcnh2       |
| GO_MF_mzGO:000004 tRNA bindi 3/451    | 56/23049  | 0.096696 | 0.284907 | 0.241352 | Farsa/Nsur  |
| GO_MF_mzGO:00167ε transferase 7/451   | 199/23049 | 0.096948 | 0.284907 | 0.241352 | Alg9/Galnt  |
| GO_MF_mzGO:00052ε delayed rec 2/451   | 27/23049  | 0.097341 | 0.284907 | 0.241352 | Kcnh2/Kcni  |
| GO_MF_mzGO:00080ε glutamate 2/451     | 27/23049  | 0.097341 | 0.284907 | 0.241352 | Grm7/Ptk2   |
| GO_MF_mzGO:00170ε AU-rich elε 2/451   | 27/23049  | 0.097341 | 0.284907 | 0.241352 | Dnd1/Elavl  |
| GO_MF_mzGO:00700ε aspartic-ty 2/451   | 27/23049  | 0.097341 | 0.284907 | 0.241352 | Bace1/Cyrr  |
| GO_MF_mzGO:004801 receptor liε 14/451 | 486/23049 | 0.098018 | 0.285939 | 0.242226 | Agrp/Bmpε   |
| GO_MF_mzGO:005121 dioxygenasε 4/451   | 91/23049  | 0.103301 | 0.300358 | 0.25444  | Ado/Alkbhε  |
| GO_MF_mzGO:00052ε potassium 5/451     | 127/23049 | 0.104278 | 0.302201 | 0.256001 | Kcne4/Kcniε |
| GO_MF_mzGO:000817 tRNA meth 2/451     | 29/23049  | 0.10981  | 0.306891 | 0.259974 | Ftsj1/Nsunε |
| GO_MF_mzGO:000151 N-acetylgl 1/451    | 6/23049   | 0.111818 | 0.306891 | 0.259974 | Chst5       |
| GO_MF_mzGO:00051ε neurotrop 1/451     | 6/23049   | 0.111818 | 0.306891 | 0.259974 | Shc1        |
| GO_MF_mzGO:000817 S-methyltr. 1/451   | 6/23049   | 0.111818 | 0.306891 | 0.259974 | Inmt        |
| GO_MF_mzGO:00086ε cAMP-dep 1/451      | 6/23049   | 0.111818 | 0.306891 | 0.259974 | Prkar1a     |
| GO_MF_mzGO:00150ε ferrous iror 1/451  | 6/23049   | 0.111818 | 0.306891 | 0.259974 | Slc25a28    |

|                                     |           |          |          |          |            |
|-------------------------------------|-----------|----------|----------|----------|------------|
| GO_MF_mzGO:001545P-P-bond-1/451     | 6/23049   | 0.111818 | 0.306891 | 0.259974 | Tomm20     |
| GO_MF_mzGO:001642CoA carbo:1/451    | 6/23049   | 0.111818 | 0.306891 | 0.259974 | Acaca      |
| GO_MF_mzGO:001681hydrolase ε1/451   | 6/23049   | 0.111818 | 0.306891 | 0.259974 | Cad        |
| GO_MF_mzGO:001995C-X-C che 1/451    | 6/23049   | 0.111818 | 0.306891 | 0.259974 | Cxcr1      |
| GO_MF_mzGO:003062U2 snRNA 1/451     | 6/23049   | 0.111818 | 0.306891 | 0.259974 | Snrpb      |
| GO_MF_mzGO:003255purine deo1/451    | 6/23049   | 0.111818 | 0.306891 | 0.259974 | Hist1h1e   |
| GO_MF_mzGO:003537chondroitir1/451   | 6/23049   | 0.111818 | 0.306891 | 0.259974 | Agrn       |
| GO_MF_mzGO:003640proteasom 1/451    | 6/23049   | 0.111818 | 0.306891 | 0.259974 | Psmc5      |
| GO_MF_mzGO:004679virion bindi1/451  | 6/23049   | 0.111818 | 0.306891 | 0.259974 | Tsg101     |
| GO_MF_mzGO:007088pre-miRNA1/451     | 6/23049   | 0.111818 | 0.306891 | 0.259974 | Ran        |
| GO_MF_mzGO:199076arrestin fan1/451  | 6/23049   | 0.111818 | 0.306891 | 0.259974 | Arrdc1     |
| GO_MF_mzGO:001517L-amino ac3/451    | 60/23049  | 0.112938 | 0.309001 | 0.261762 | Slc25a38/S |
| GO_MF_mzGO:000164adenylate c1/451   | 7/23049   | 0.129202 | 0.329054 | 0.27875  | Grm7       |
| GO_MF_mzGO:000374translation 1/451  | 7/23049   | 0.129202 | 0.329054 | 0.27875  | 2810006K2  |
| GO_MF_mzGO:000497NMDA glut1/451     | 7/23049   | 0.129202 | 0.329054 | 0.27875  | Ptk2b      |
| GO_MF_mzGO:000807translation 1/451  | 7/23049   | 0.129202 | 0.329054 | 0.27875  | 2810006K2  |
| GO_MF_mzGO:001085cyclase reg1/451   | 7/23049   | 0.129202 | 0.329054 | 0.27875  | Grm7       |
| GO_MF_mzGO:001518L-alanine t1/451   | 7/23049   | 0.129202 | 0.329054 | 0.27875  | Slc36a4    |
| GO_MF_mzGO:001524fatty acid tr1/451 | 7/23049   | 0.129202 | 0.329054 | 0.27875  | Slc27a2    |
| GO_MF_mzGO:001621acyl-CoA c1/451    | 7/23049   | 0.129202 | 0.329054 | 0.27875  | Fads1      |
| GO_MF_mzGO:001642tRNA (cyto 1/451   | 7/23049   | 0.129202 | 0.329054 | 0.27875  | Nsun2      |
| GO_MF_mzGO:001671oxidoreduc1/451    | 7/23049   | 0.129202 | 0.329054 | 0.27875  | Pcbd1      |
| GO_MF_mzGO:001684amidine-ly 1/451   | 7/23049   | 0.129202 | 0.329054 | 0.27875  | Adsl       |
| GO_MF_mzGO:001716CDP-alcoh 1/451    | 7/23049   | 0.129202 | 0.329054 | 0.27875  | Cdipt      |
| GO_MF_mzGO:002285alanine trar1/451  | 7/23049   | 0.129202 | 0.329054 | 0.27875  | Slc36a4    |
| GO_MF_mzGO:003369sialic acid t1/451 | 7/23049   | 0.129202 | 0.329054 | 0.27875  | Sele       |
| GO_MF_mzGO:004228MHC class 1/451    | 7/23049   | 0.129202 | 0.329054 | 0.27875  | Col2a1     |
| GO_MF_mzGO:004697histone me1/451    | 7/23049   | 0.129202 | 0.329054 | 0.27875  | Suz12      |
| GO_MF_mzGO:004713protein-dis1/451   | 7/23049   | 0.129202 | 0.329054 | 0.27875  | Txndc17    |
| GO_MF_mzGO:005188G-quadrup1/451     | 7/23049   | 0.129202 | 0.329054 | 0.27875  | Xrn1       |
| GO_MF_mzGO:006113endopeptic1/451    | 7/23049   | 0.129202 | 0.329054 | 0.27875  | Sfrp2      |
| GO_MF_mzGO:006167importin-a 1/451   | 7/23049   | 0.129202 | 0.329054 | 0.27875  | Ran        |
| GO_MF_mzGO:007032thyroid hor1/451   | 7/23049   | 0.129202 | 0.329054 | 0.27875  | Crym       |
| GO_MF_mzGO:007234NAADP-se 1/451     | 7/23049   | 0.129202 | 0.329054 | 0.27875  | Tpcn1      |
| GO_MF_mzGO:199024N6-methyl 1/451    | 7/23049   | 0.129202 | 0.329054 | 0.27875  | Hnrnpa2b1  |
| GO_MF_mzGO:006163ubiquitin α2/451   | 32/23049  | 0.129231 | 0.329054 | 0.27875  | Ube2j1/Ub  |
| GO_MF_mzGO:001650peptidase ε2/451   | 33/23049  | 0.135872 | 0.342989 | 0.290554 | Rack1/Sfrp |
| GO_MF_mzGO:004228MHC prote2/451     | 33/23049  | 0.135872 | 0.342989 | 0.290554 | Col2a1/Dei |
| GO_MF_mzGO:006165ubiquitin-li2/451  | 33/23049  | 0.135872 | 0.342989 | 0.290554 | Ube2j1/Ub  |
| GO_MF_mzGO:009909ligand-gat4/451    | 101/23049 | 0.136393 | 0.343321 | 0.290835 | Kcnh2/Pex! |
| GO_MF_mzGO:190293phosphatic4/451    | 102/23049 | 0.139915 | 0.346963 | 0.29392  | Arap3/Chr  |
| GO_MF_mzGO:000521intracellula 2/451 | 34/23049  | 0.142586 | 0.346963 | 0.29392  | Pex5l/Tpcn |
| GO_MF_mzGO:003033cyclin bindi2/451  | 34/23049  | 0.142586 | 0.346963 | 0.29392  | Rack1/Klhc |
| GO_MF_mzGO:007056adenyllyltra 2/451 | 34/23049  | 0.142586 | 0.346963 | 0.29392  | Oas1b/Oas  |
| GO_MF_mzGO:000395NADPH-he1/451      | 8/23049   | 0.146246 | 0.346963 | 0.29392  | Cyb5r4     |
| GO_MF_mzGO:000430enoyl-CoA 1/451    | 8/23049   | 0.146246 | 0.346963 | 0.29392  | Echdc2     |
| GO_MF_mzGO:000486cAMP-dep 1/451     | 8/23049   | 0.146246 | 0.346963 | 0.29392  | Prkar1a    |
| GO_MF_mzGO:001518glycine trar1/451  | 8/23049   | 0.146246 | 0.346963 | 0.29392  | Slc25a38   |



|                                     |           |          |          |          |             |
|-------------------------------------|-----------|----------|----------|----------|-------------|
| GO_MF_mzGO:001515L-proline tr1/451  | 8/23049   | 0.146246 | 0.346963 | 0.29392  | Slc36a4     |
| GO_MF_mzGO:001515L-serine tr1/451   | 8/23049   | 0.146246 | 0.346963 | 0.29392  | Slc7a10     |
| GO_MF_mzGO:001617superoxide 1/451   | 8/23049   | 0.146246 | 0.346963 | 0.29392  | Cybb        |
| GO_MF_mzGO:001649C-X-C che 1/451    | 8/23049   | 0.146246 | 0.346963 | 0.29392  | Cxcr1       |
| GO_MF_mzGO:001688ligase activ 1/451 | 8/23049   | 0.146246 | 0.346963 | 0.29392  | Acaca       |
| GO_MF_mzGO:001999diacylglyce 1/451  | 8/23049   | 0.146246 | 0.346963 | 0.29392  | Cdipt       |
| GO_MF_mzGO:002288serine tran1/451   | 8/23049   | 0.146246 | 0.346963 | 0.29392  | Slc7a10     |
| GO_MF_mzGO:003255deoxyribose 1/451  | 8/23049   | 0.146246 | 0.346963 | 0.29392  | Hist1h1e    |
| GO_MF_mzGO:003631annealing 1/451    | 8/23049   | 0.146246 | 0.346963 | 0.29392  | Recql       |
| GO_MF_mzGO:004280vitamin D r1/451   | 8/23049   | 0.146246 | 0.346963 | 0.29392  | Hr          |
| GO_MF_mzGO:004314ATP-deper 1/451    | 8/23049   | 0.146246 | 0.346963 | 0.29392  | Recql       |
| GO_MF_mzGO:009715pre-mRNA 1/451     | 8/23049   | 0.146246 | 0.346963 | 0.29392  | Hnrnpa2b1   |
| GO_MF_mzGO:199044U1 snRNP 1/451     | 8/23049   | 0.146246 | 0.346963 | 0.29392  | Snrpb       |
| GO_MF_mzGO:000512cytokine ac7/451   | 222/23049 | 0.146504 | 0.346963 | 0.29392  | Bmp4/Csf2   |
| GO_MF_mzGO:001988protein phr3/451   | 68/23049  | 0.148177 | 0.349984 | 0.296479 | Elfn2/Phact |
| GO_MF_mzGO:000853Ran GTPase2/451    | 35/23049  | 0.149369 | 0.350918 | 0.297271 | Ipo7/Ipo8   |
| GO_MF_mzGO:001711Rab guanyl2/451    | 35/23049  | 0.149369 | 0.350918 | 0.297271 | Dennd2a/S   |
| GO_MF_mzGO:000526cation char9/451   | 307/23049 | 0.150046 | 0.351571 | 0.297824 | Grm7/Kcne   |
| GO_MF_mzGO:000438helicase ac5/451   | 144/23049 | 0.152644 | 0.35671  | 0.302177 | Chd6/Chd7   |
| GO_MF_mzGO:000417endopeptid12/451   | 438/23049 | 0.153251 | 0.357179 | 0.302575 | Bace1/Cap   |
| GO_MF_mzGO:001526channel ac12/451   | 439/23049 | 0.154964 | 0.359271 | 0.304347 | Cybb/Gpr8   |
| GO_MF_mzGO:002280passive tra12/451  | 439/23049 | 0.154964 | 0.359271 | 0.304347 | Cybb/Gpr8   |
| GO_MF_mzGO:007085growth fac5/451    | 145/23049 | 0.155743 | 0.359337 | 0.304402 | Angpt4/Cs   |
| GO_MF_mzGO:001683carboxy-ly2/451    | 36/23049  | 0.156216 | 0.359337 | 0.304402 | Glul/Sgpl1  |
| GO_MF_mzGO:003517histone kin2/451   | 36/23049  | 0.156216 | 0.359337 | 0.304402 | Aurkb/Stk-  |
| GO_MF_mzGO:000028magnesium6/451     | 186/23049 | 0.158681 | 0.361077 | 0.305877 | Cib3/Glul/H |
| GO_MF_mzGO:000101RNA polymr1/451    | 9/23049   | 0.162957 | 0.361077 | 0.305877 | Cebpa       |
| GO_MF_mzGO:000215G-quadrup1/451     | 9/23049   | 0.162957 | 0.361077 | 0.305877 | Xrn1        |
| GO_MF_mzGO:0003853-beta-hyc1/451    | 9/23049   | 0.162957 | 0.361077 | 0.305877 | Sdr42e1     |
| GO_MF_mzGO:000398acetyl-CoA1/451    | 9/23049   | 0.162957 | 0.361077 | 0.305877 | Acat2       |
| GO_MF_mzGO:000401adenylate 1/451    | 9/23049   | 0.162957 | 0.361077 | 0.305877 | Ak8         |
| GO_MF_mzGO:000516neurotropt1/451    | 9/23049   | 0.162957 | 0.361077 | 0.305877 | Shc1        |
| GO_MF_mzGO:000535carbohydr1/451     | 9/23049   | 0.162957 | 0.361077 | 0.305877 | Slc45a4     |
| GO_MF_mzGO:000538iron ion tra1/451  | 9/23049   | 0.162957 | 0.361077 | 0.305877 | Slc25a28    |
| GO_MF_mzGO:001672oxidoreduc1/451    | 9/23049   | 0.162957 | 0.361077 | 0.305877 | Cybrd1      |
| GO_MF_mzGO:001688ligase activ 1/451 | 9/23049   | 0.162957 | 0.361077 | 0.305877 | Rtcb        |
| GO_MF_mzGO:008600voltage-ga1/451    | 9/23049   | 0.162957 | 0.361077 | 0.305877 | Kcnh2       |
| GO_MF_mzGO:009898G-protein 1/451    | 9/23049   | 0.162957 | 0.361077 | 0.305877 | Grm7        |
| GO_MF_mzGO:001687ligase activ2/451  | 37/23049  | 0.16312  | 0.361077 | 0.305877 | Acsl4/Slc27 |
| GO_MF_mzGO:003136translation 2/451  | 37/23049  | 0.16312  | 0.361077 | 0.305877 | Eif5/Syt11  |
| GO_MF_mzGO:000551calmodulin6/451    | 188/23049 | 0.16422  | 0.362602 | 0.307169 | Grm7/Kcnf   |
| GO_MF_mzGO:003055cyclic nucle2/451  | 38/23049  | 0.170078 | 0.374408 | 0.31717  | Pde1a/Prka  |
| GO_MF_mzGO:000534organic aci5/451   | 150/23049 | 0.171617 | 0.374408 | 0.31717  | Slc6a21/Slc |
| GO_MF_mzGO:004694carboxylic i5/451  | 150/23049 | 0.171617 | 0.374408 | 0.31717  | Slc6a21/Slc |
| GO_MF_mzGO:000554phosphatic3/451    | 73/23049  | 0.171776 | 0.374408 | 0.31717  | Chmp3/My    |
| GO_MF_mzGO:006163ubiquitin p7/451   | 233/23049 | 0.173752 | 0.374408 | 0.31717  | Fbxo40/He   |
| GO_MF_mzGO:000377actin bindir11/451 | 406/23049 | 0.174802 | 0.374408 | 0.31717  | Alkbh4/Crc  |
| GO_MF_mzGO:001990protein phr5/451   | 151/23049 | 0.174865 | 0.374408 | 0.31717  | Cdc5l/Csk/  |

|                                              |           |          |          |          |             |
|----------------------------------------------|-----------|----------|----------|----------|-------------|
| GO_MF_mzGO:000554phosphatic2/451             | 39/23049  | 0.177084 | 0.374408 | 0.31717  | Arap3/Myc   |
| GO_MF_mzGO:001514carbohydrate2/451           | 39/23049  | 0.177084 | 0.374408 | 0.31717  | Mfsd4b3/S   |
| GO_MF_mzGO:001675transferase8/451            | 277/23049 | 0.177687 | 0.374408 | 0.31717  | Alg9/B4gal  |
| GO_MF_mzGO:000802protein C-17/451            | 235/23049 | 0.178928 | 0.374408 | 0.31717  | Atf4/Bloc1s |
| GO_MF_mzGO:000034RNA 7-me1/451               | 10/23049  | 0.179342 | 0.374408 | 0.31717  | Ncbp2       |
| GO_MF_mzGO:000113transcription1/451          | 10/23049  | 0.179342 | 0.374408 | 0.31717  | Cdc5l       |
| GO_MF_mzGO:000216dystroglycan1/451           | 10/23049  | 0.179342 | 0.374408 | 0.31717  | Agrn        |
| GO_MF_mzGO:000443phosphatic1/451             | 10/23049  | 0.179342 | 0.374408 | 0.31717  | Mtmr2       |
| GO_MF_mzGO:000817mRNA met1/451               | 10/23049  | 0.179342 | 0.374408 | 0.31717  | Mettl14     |
| GO_MF_mzGO:000865cysteine-tyr1/451           | 10/23049  | 0.179342 | 0.374408 | 0.31717  | Rack1       |
| GO_MF_mzGO:000988photoreceptor1/451          | 10/23049  | 0.179342 | 0.374408 | 0.31717  | Cry1        |
| GO_MF_mzGO:001085calcium-dependent1/451      | 10/23049  | 0.179342 | 0.374408 | 0.31717  | Pink1       |
| GO_MF_mzGO:001516pyrimidine1/451             | 10/23049  | 0.179342 | 0.374408 | 0.31717  | Slc35a4     |
| GO_MF_mzGO:001688carbon-nitrogen1/451        | 10/23049  | 0.179342 | 0.374408 | 0.31717  | Cad         |
| GO_MF_mzGO:00507CARD domain1/451             | 10/23049  | 0.179342 | 0.374408 | 0.31717  | Mavs        |
| GO_MF_mzGO:00985CG-rich strand1/451          | 10/23049  | 0.179342 | 0.374408 | 0.31717  | Hnrnpa2b1   |
| GO_MF_mzGO:000417aminopeptidase2/451         | 40/23049  | 0.184135 | 0.382672 | 0.324171 | Metap2/Nrg  |
| GO_MF_mzGO:006165ubiquitin-ligase7/451       | 237/23049 | 0.184169 | 0.382672 | 0.324171 | Fbxo40/He   |
| GO_MF_mzGO:000372double-stranded3/451        | 76/23049  | 0.186416 | 0.386428 | 0.327353 | Elavl1/Oas1 |
| GO_MF_mzGO:190195phosphatic5/451             | 155/23049 | 0.188087 | 0.388978 | 0.329513 | Arap3/Chr   |
| GO_MF_mzGO:000504signal sequence2/451        | 41/23049  | 0.191225 | 0.393944 | 0.333719 | Pex5l/Tom1  |
| GO_MF_mzGO:000452ribonucleic acid1/451       | 11/23049  | 0.195407 | 0.393944 | 0.333719 | Rpp38       |
| GO_MF_mzGO:000486protein serine1/451         | 11/23049  | 0.195407 | 0.393944 | 0.333719 | Ppp1r14c    |
| GO_MF_mzGO:000522intracellular1/451          | 11/23049  | 0.195407 | 0.393944 | 0.333719 | Pex5l       |
| GO_MF_mzGO:001683aldehyde dehydrogenase1/451 | 11/23049  | 0.195407 | 0.393944 | 0.333719 | Sgpl1       |
| GO_MF_mzGO:001684carbon-sulfur1/451          | 11/23049  | 0.195407 | 0.393944 | 0.333719 | Kyat3       |
| GO_MF_mzGO:001913pyrimidine1/451             | 11/23049  | 0.195407 | 0.393944 | 0.333719 | Cad         |
| GO_MF_mzGO:003612BMP binding1/451            | 11/23049  | 0.195407 | 0.393944 | 0.333719 | Agrn        |
| GO_MF_mzGO:004385cyclic nucleotide1/451      | 11/23049  | 0.195407 | 0.393944 | 0.333719 | Pex5l       |
| GO_MF_mzGO:005274phosphatic1/451             | 11/23049  | 0.195407 | 0.393944 | 0.333719 | Mtmr2       |
| GO_MF_mzGO:007041I-SMAD binding1/451         | 11/23049  | 0.195407 | 0.393944 | 0.333719 | Tgfb1i1     |
| GO_MF_mzGO:000856protein transmembrane3/451  | 78/23049  | 0.19635  | 0.394942 | 0.334564 | Ipo7/Ipo8/  |
| GO_MF_mzGO:004282histone deacetylase4/451    | 118/23049 | 0.200685 | 0.402741 | 0.341172 | Cebpa/Cry   |
| GO_MF_mzGO:000809DNA-dependent3/451          | 79/23049  | 0.201365 | 0.403188 | 0.34155  | Chd6/Gtf2l  |
| GO_MF_mzGO:001653peptidase inhibitor1/451    | 12/23049  | 0.211158 | 0.417108 | 0.353342 | Rack1       |
| GO_MF_mzGO:003054receptor activity1/451      | 12/23049  | 0.211158 | 0.417108 | 0.353342 | Angpt4      |
| GO_MF_mzGO:004304single-stranded1/451        | 12/23049  | 0.211158 | 0.417108 | 0.353342 | Hnrnpa2b1   |
| GO_MF_mzGO:004843platelet-derived1/451       | 12/23049  | 0.211158 | 0.417108 | 0.353342 | Col2a1      |
| GO_MF_mzGO:005066oxidoreductase1/451         | 12/23049  | 0.211158 | 0.417108 | 0.353342 | Cybb        |
| GO_MF_mzGO:005101microtubule1/451            | 12/23049  | 0.211158 | 0.417108 | 0.353342 | Clip2       |
| GO_MF_mzGO:000524voltage-gated2/451          | 44/23049  | 0.212692 | 0.419197 | 0.355112 | Grm7/Tpcr   |
| GO_MF_mzGO:001507potassium channel5/451      | 163/23049 | 0.215543 | 0.423868 | 0.359069 | Kcne4/Kcnc1 |
| GO_MF_mzGO:000813translation3/451            | 82/23049  | 0.216584 | 0.424968 | 0.36     | 2810006K2   |
| GO_MF_mzGO:000508Ras guanyl4/451             | 124/23049 | 0.225248 | 0.430741 | 0.364891 | Dennd2a/E   |
| GO_MF_mzGO:000517vascular endothelial1/451   | 13/23049  | 0.226601 | 0.430741 | 0.364891 | Angpt4      |
| GO_MF_mzGO:000524gap junction1/451           | 13/23049  | 0.226601 | 0.430741 | 0.364891 | Panx2       |
| GO_MF_mzGO:000533nucleotide1/451             | 13/23049  | 0.226601 | 0.430741 | 0.364891 | Slc35a4     |
| GO_MF_mzGO:000848sulfuric ester1/451         | 13/23049  | 0.226601 | 0.430741 | 0.364891 | Sulf2       |

|                                     |           |          |          |          |             |
|-------------------------------------|-----------|----------|----------|----------|-------------|
| GO_MF_mzGO:001592glucosidasε1/451   | 13/23049  | 0.226601 | 0.430741 | 0.364891 | Gba2        |
| GO_MF_mzGO:001642tRNA (guar1/451    | 13/23049  | 0.226601 | 0.430741 | 0.364891 | Ftsj1       |
| GO_MF_mzGO:001684carbon-niti1/451   | 13/23049  | 0.226601 | 0.430741 | 0.364891 | Adsl        |
| GO_MF_mzGO:00192C nucleoside 1/451  | 13/23049  | 0.226601 | 0.430741 | 0.364891 | Ak8         |
| GO_MF_mzGO:003532Toll-like re1/451  | 13/23049  | 0.226601 | 0.430741 | 0.364891 | Tollip      |
| GO_MF_mzGO:003592mRNA 3'-L1/451     | 13/23049  | 0.226601 | 0.430741 | 0.364891 | Elavl1      |
| GO_MF_mzGO:00475ε3',5'-cyclic1/451  | 13/23049  | 0.226601 | 0.430741 | 0.364891 | Pde1a       |
| GO_MF_mzGO:00971εcysteine-ty1/451   | 13/23049  | 0.226601 | 0.430741 | 0.364891 | Casp16-ps   |
| GO_MF_mzGO:009761annealing ε1/451   | 13/23049  | 0.226601 | 0.430741 | 0.364891 | Recql       |
| GO_MF_mzGO:00041εcysteine-ty3/451   | 84/23049  | 0.22686  | 0.430741 | 0.364891 | Capn15/Ca   |
| GO_MF_mzGO:00312εsmall GTPa11/451   | 435/23049 | 0.23468  | 0.444631 | 0.376657 | Arap3/Cit/I |
| GO_MF_mzGO:00045εalpha-man1/451     | 14/23049  | 0.241743 | 0.448369 | 0.379824 | Man2c1      |
| GO_MF_mzGO:00046εprenyltrans1/451   | 14/23049  | 0.241743 | 0.448369 | 0.379824 | Cox10       |
| GO_MF_mzGO:000832protein tra1/451   | 14/23049  | 0.241743 | 0.448369 | 0.379824 | Tomm20      |
| GO_MF_mzGO:00344εheparan su1/451    | 14/23049  | 0.241743 | 0.448369 | 0.379824 | Hs3st3b1    |
| GO_MF_mzGO:00431ε3'-5' DNA 1/451    | 14/23049  | 0.241743 | 0.448369 | 0.379824 | Recql       |
| GO_MF_mzGO:004801receptor ar1/451   | 14/23049  | 0.241743 | 0.448369 | 0.379824 | Dkk4        |
| GO_MF_mzGO:00481εtau protein1/451   | 14/23049  | 0.241743 | 0.448369 | 0.379824 | Dyrk1a      |
| GO_MF_mzGO:00704C NAD+ binc1/451    | 14/23049  | 0.241743 | 0.448369 | 0.379824 | Sirt7       |
| GO_MF_mzGO:00707C BMP recep1/451    | 14/23049  | 0.241743 | 0.448369 | 0.379824 | Bmp4        |
| GO_MF_mzGO:009884sequence-:1/451    | 14/23049  | 0.241743 | 0.448369 | 0.379824 | Hnrnpa2b1   |
| GO_MF_mzGO:000472phosphopr5/451     | 171/23049 | 0.244158 | 0.451897 | 0.382813 | Mttr2/Mtr   |
| GO_MF_mzGO:000374translation 2/451  | 49/23049  | 0.248896 | 0.4597   | 0.389423 | Eif4g3/Eif5 |
| GO_MF_mzGO:004257phosphoric9/451    | 351/23049 | 0.251288 | 0.463149 | 0.392344 | Mttr2/Mtr   |
| GO_MF_mzGO:000484ubiquitin-ε11/451  | 443/23049 | 0.252458 | 0.464178 | 0.393216 | Fbxo40/He   |
| GO_MF_mzGO:00082εmetalloexo2/451    | 50/23049  | 0.256169 | 0.464178 | 0.393216 | Metap2/Nε   |
| GO_MF_mzGO:005101protein kin.2/451  | 50/23049  | 0.256169 | 0.464178 | 0.393216 | Csk/Prkar1. |
| GO_MF_mzGO:00051εinsulin-like 1/451 | 15/23049  | 0.256589 | 0.464178 | 0.393216 | Shc1        |
| GO_MF_mzGO:00051εneurotrop1/451     | 15/23049  | 0.256589 | 0.464178 | 0.393216 | Shc1        |
| GO_MF_mzGO:001592mannosida1/451     | 15/23049  | 0.256589 | 0.464178 | 0.393216 | Man2c1      |
| GO_MF_mzGO:00162C AMP bindir1/451   | 15/23049  | 0.256589 | 0.464178 | 0.393216 | Hist1h1e    |
| GO_MF_mzGO:00166εoxidoreduc1/451    | 15/23049  | 0.256589 | 0.464178 | 0.393216 | Txndc17     |
| GO_MF_mzGO:00320εbile acid bi1/451  | 15/23049  | 0.256589 | 0.464178 | 0.393216 | Fabp6       |
| GO_MF_mzGO:005111ATPase bin3/451    | 90/23049  | 0.258189 | 0.466116 | 0.394858 | Der1/Pde4   |
| GO_MF_mzGO:001984vitamin bin4/451   | 133/23049 | 0.26339  | 0.471857 | 0.399721 | Acaca/Kyat  |
| GO_MF_mzGO:00167εphosphata:7/451    | 265/23049 | 0.26341  | 0.471857 | 0.399721 | Mttr2/Mtr   |
| GO_MF_mzGO:001527ligand-gatε4/451   | 134/23049 | 0.267705 | 0.471857 | 0.399721 | Kcni2/Pex!  |
| GO_MF_mzGO:00228εligand-gatε4/451   | 134/23049 | 0.267705 | 0.471857 | 0.399721 | Kcni2/Pex!  |
| GO_MF_mzGO:000851organic ani6/451   | 222/23049 | 0.269006 | 0.471857 | 0.399721 | Slc6a21/Slc |
| GO_MF_mzGO:000521ion channe10/451   | 404/23049 | 0.269109 | 0.471857 | 0.399721 | Gpr89/Grr   |
| GO_MF_mzGO:00039εacyl-CoA c1/451    | 16/23049  | 0.271144 | 0.471857 | 0.399721 | Ivd         |
| GO_MF_mzGO:000454tRNA-spec1/451     | 16/23049  | 0.271144 | 0.471857 | 0.399721 | Rpp38       |
| GO_MF_mzGO:00083C voltage-ga1/451   | 16/23049  | 0.271144 | 0.471857 | 0.399721 | Gpr89       |
| GO_MF_mzGO:001667oxidoreduc1/451    | 16/23049  | 0.271144 | 0.471857 | 0.399721 | Msr3        |
| GO_MF_mzGO:001672oxidoreduc1/451    | 16/23049  | 0.271144 | 0.471857 | 0.399721 | Cybrd1      |
| GO_MF_mzGO:00168C dipeptidasε1/451  | 16/23049  | 0.271144 | 0.471857 | 0.399721 | Pm20d2      |
| GO_MF_mzGO:00171εNAD-depe1/451      | 16/23049  | 0.271144 | 0.471857 | 0.399721 | Sirt7       |
| GO_MF_mzGO:00302εprotein tyrε1/451  | 16/23049  | 0.271144 | 0.471857 | 0.399721 | Angpt4      |

|                                     |           |          |          |          |             |
|-------------------------------------|-----------|----------|----------|----------|-------------|
| GO_MF_mzGO:003055cGMP bind1/451     | 16/23049  | 0.271144 | 0.471857 | 0.399721 | Pde1a       |
| GO_MF_mzGO:004225MHC class 1/451    | 16/23049  | 0.271144 | 0.471857 | 0.399721 | Derl1       |
| GO_MF_mzGO:005137muscle alpl1/451   | 16/23049  | 0.271144 | 0.471857 | 0.399721 | Nrap        |
| GO_MF_mzGO:007003telomerase1/451    | 16/23049  | 0.271144 | 0.471857 | 0.399721 | Snrpb       |
| GO_MF_mzGO:000485enzyme int10/451   | 405/23049 | 0.271545 | 0.471857 | 0.399721 | Agrn/Ambp   |
| GO_MF_mzGO:000115enhancer s3/451    | 93/23049  | 0.274069 | 0.47437  | 0.40185  | H3f3b/Six3  |
| GO_MF_mzGO:000485cytokine re3/451   | 93/23049  | 0.274069 | 0.47437  | 0.40185  | Cxcr1/Il10r |
| GO_MF_mzGO:000371transcriptic5/451  | 180/23049 | 0.277447 | 0.479277 | 0.406006 | Crym/Erf/Tr |
| GO_MF_mzGO:000802ATP-deper3/451     | 94/23049  | 0.279385 | 0.479869 | 0.406508 | Ddx3y/Dhx   |
| GO_MF_mzGO:007003purine NTF3/451    | 94/23049  | 0.279385 | 0.479869 | 0.406508 | Ddx3y/Dhx   |
| GO_MF_mzGO:001985protein kin.5/451  | 181/23049 | 0.281204 | 0.479869 | 0.406508 | Angpt4/Ck   |
| GO_MF_mzGO:007006RNA polyn2/451     | 54/23049  | 0.28527  | 0.479869 | 0.406508 | Pabpn1/Pp   |
| GO_MF_mzGO:000455nucleoside 1/451   | 17/23049  | 0.285416 | 0.479869 | 0.406508 | Ak8         |
| GO_MF_mzGO:000835RNA polyn1/451     | 17/23049  | 0.285416 | 0.479869 | 0.406508 | Gtf2h1      |
| GO_MF_mzGO:0008405'-3' exont1/451   | 17/23049  | 0.285416 | 0.479869 | 0.406508 | Xrn1        |
| GO_MF_mzGO:001664oxidoreduc1/451    | 17/23049  | 0.285416 | 0.479869 | 0.406508 | Crym        |
| GO_MF_mzGO:002285macromole1/451     | 17/23049  | 0.285416 | 0.479869 | 0.406508 | Tomm20      |
| GO_MF_mzGO:003067Rac guanyl1/451    | 17/23049  | 0.285416 | 0.479869 | 0.406508 | Farp2       |
| GO_MF_mzGO:003497NAD-depe1/451      | 17/23049  | 0.285416 | 0.479869 | 0.406508 | Sirt7       |
| GO_MF_mzGO:003561RNA stem-1/451     | 17/23049  | 0.285416 | 0.479869 | 0.406508 | Eprs        |
| GO_MF_mzGO:004342protein kin.1/451  | 17/23049  | 0.285416 | 0.479869 | 0.406508 | Pink1       |
| GO_MF_mzGO:007049oligosacchi1/451   | 17/23049  | 0.285416 | 0.479869 | 0.406508 | Sele        |
| GO_MF_mzGO:004529cadherin bi8/451   | 321/23049 | 0.293749 | 0.492746 | 0.417417 | Eif5/Rack1/ |
| GO_MF_mzGO:000472protein tyr3/451   | 97/23049  | 0.295387 | 0.492746 | 0.417417 | Mttr2/Mtr   |
| GO_MF_mzGO:002283substrate-ε10/451  | 415/23049 | 0.296264 | 0.492746 | 0.417417 | Gpr89/Grrr  |
| GO_MF_mzGO:001975ubiquitin-li11/451 | 463/23049 | 0.298793 | 0.492746 | 0.417417 | Fbxo40/He   |
| GO_MF_mzGO:001986immunoglc1/451     | 18/23049  | 0.299408 | 0.492746 | 0.417417 | Ambp        |
| GO_MF_mzGO:007015DNA polyn1/451     | 18/23049  | 0.299408 | 0.492746 | 0.417417 | Hnrnpa2b1   |
| GO_MF_mzGO:000837acetylglucc2/451   | 56/23049  | 0.299787 | 0.492746 | 0.417417 | Lfng/Mgat1  |
| GO_MF_mzGO:001627lysine N-m2/451    | 56/23049  | 0.299787 | 0.492746 | 0.417417 | Eef1akmt2/  |
| GO_MF_mzGO:001627protein-lys2/451   | 56/23049  | 0.299787 | 0.492746 | 0.417417 | Eef1akmt2/  |
| GO_MF_mzGO:001666oxidoreduc2/451    | 56/23049  | 0.299787 | 0.492746 | 0.417417 | Msrp3/Txn   |
| GO_MF_mzGO:003506methylatec2/451    | 56/23049  | 0.299787 | 0.492746 | 0.417417 | Rrp8/Suz12  |
| GO_MF_mzGO:014003methylation2/451   | 56/23049  | 0.299787 | 0.492746 | 0.417417 | Rrp8/Suz12  |
| GO_MF_mzGO:000392GTPase act7/451    | 278/23049 | 0.303073 | 0.497221 | 0.421207 | Rab11a/Ra   |
| GO_MF_mzGO:000097RNA polyn11/451    | 466/23049 | 0.305941 | 0.499756 | 0.423355 | Atf4/Cebpα  |
| GO_MF_mzGO:000823exopeptidase3/451  | 99/23049  | 0.306086 | 0.499756 | 0.423355 | Metap2/Nq   |
| GO_MF_mzGO:005121phosphopr3/451     | 100/23049 | 0.311443 | 0.499756 | 0.423355 | Prkcsh/Shc  |
| GO_MF_mzGO:000375protein dis1/451   | 19/23049  | 0.313128 | 0.499756 | 0.423355 | Txndc5      |
| GO_MF_mzGO:000419calcium-de1/451    | 19/23049  | 0.313128 | 0.499756 | 0.423355 | Capn15      |
| GO_MF_mzGO:000465polypeptid1/451    | 19/23049  | 0.313128 | 0.499756 | 0.423355 | Galnt2      |
| GO_MF_mzGO:000497ionotropic 1/451   | 19/23049  | 0.313128 | 0.499756 | 0.423355 | Ptk2b       |
| GO_MF_mzGO:000514interleukin.1/451  | 19/23049  | 0.313128 | 0.499756 | 0.423355 | Tollip      |
| GO_MF_mzGO:000540carbohydrate1/451  | 19/23049  | 0.313128 | 0.499756 | 0.423355 | Slc45a4     |
| GO_MF_mzGO:001675phosphotr1/451     | 19/23049  | 0.313128 | 0.499756 | 0.423355 | Cdipt       |
| GO_MF_mzGO:001686intramolec1/451    | 19/23049  | 0.313128 | 0.499756 | 0.423355 | Txndc5      |
| GO_MF_mzGO:003459phosphatic1/451    | 19/23049  | 0.313128 | 0.499756 | 0.423355 | Mttr2       |
| GO_MF_mzGO:004696proton-tra1/451    | 19/23049  | 0.313128 | 0.499756 | 0.423355 | Atp6v1h     |

|                                            |           |          |          |          |             |
|--------------------------------------------|-----------|----------|----------|----------|-------------|
| GO_MF_mzGO:005043transformin1/451          | 19/23049  | 0.313128 | 0.499756 | 0.423355 | Agrrn       |
| GO_MF_mzGO:005274inositol phosphate1/451   | 19/23049  | 0.313128 | 0.499756 | 0.423355 | Mtmr7       |
| GO_MF_mzGO:002003heme binding4/451         | 145/23049 | 0.315854 | 0.503196 | 0.426269 | Ambp/Cyb    |
| GO_MF_mzGO:190168sulfur compound6/451      | 237/23049 | 0.319723 | 0.508441 | 0.430712 | Acaca/Agrr  |
| GO_MF_mzGO:001523drug transport3/451       | 102/23049 | 0.322161 | 0.510134 | 0.432147 | Slc25a38/S  |
| GO_MF_mzGO:000508guanylate nucleotide5/451 | 192/23049 | 0.323092 | 0.510134 | 0.432147 | Dennd2a/E   |
| GO_MF_mzGO:001983growth factor4/451        | 147/23049 | 0.324703 | 0.510134 | 0.432147 | Agrrn/Col2a |
| GO_MF_mzGO:000122transcription1/451        | 20/23049  | 0.326579 | 0.510134 | 0.432147 | Nr4a3       |
| GO_MF_mzGO:000438guanylate nucleotide1/451 | 20/23049  | 0.326579 | 0.510134 | 0.432147 | Gucy2c      |
| GO_MF_mzGO:000524inward rectifier1/451     | 20/23049  | 0.326579 | 0.510134 | 0.432147 | Kcnh2       |
| GO_MF_mzGO:003121phosphatidyl1/451         | 20/23049  | 0.326579 | 0.510134 | 0.432147 | Chmp3       |
| GO_MF_mzGO:003148myosin V b1/451           | 20/23049  | 0.326579 | 0.510134 | 0.432147 | Rab11a      |
| GO_MF_mzGO:003525glucocorticoid1/451       | 20/23049  | 0.326579 | 0.510134 | 0.432147 | Nr4a3       |
| GO_MF_mzGO:005099quaternary1/451           | 20/23049  | 0.326579 | 0.510134 | 0.432147 | Chmp3       |
| GO_MF_mzGO:000202protease inhibitor4/451   | 148/23049 | 0.329134 | 0.513216 | 0.434757 | Chmp3/De    |
| GO_MF_mzGO:000098proximal promoter11/451   | 477/23049 | 0.332497 | 0.517229 | 0.438157 | Atf4/Cebp   |
| GO_MF_mzGO:003532enhancer element3/451     | 104/23049 | 0.332882 | 0.517229 | 0.438157 | H3f3b/Six3  |
| GO_MF_mzGO:000472protein serine2/451       | 61/23049  | 0.335823 | 0.518778 | 0.439469 | Pdp1/Ppm    |
| GO_MF_mzGO:000508protein kinase2/451       | 61/23049  | 0.335823 | 0.518778 | 0.439469 | Rack1/Prkc  |
| GO_MF_mzGO:000401adenylate nucleotide1/451 | 21/23049  | 0.339767 | 0.518778 | 0.439469 | Gucy2c      |
| GO_MF_mzGO:001523solute:transporter1/451   | 21/23049  | 0.339767 | 0.518778 | 0.439469 | Slc45a4     |
| GO_MF_mzGO:001643C-acyltransferase1/451    | 21/23049  | 0.339767 | 0.518778 | 0.439469 | Acat2       |
| GO_MF_mzGO:001923nucleotide1/451           | 21/23049  | 0.339767 | 0.518778 | 0.439469 | Ak8         |
| GO_MF_mzGO:002282wide pore channel1/451    | 21/23049  | 0.339767 | 0.518778 | 0.439469 | Panx2       |
| GO_MF_mzGO:003168adrenergic1/451           | 21/23049  | 0.339767 | 0.518778 | 0.439469 | Sh3gl1      |
| GO_MF_mzGO:005142peptide hormone1/451      | 21/23049  | 0.339767 | 0.518778 | 0.439469 | Psmc5       |
| GO_MF_mzGO:007063transmembrane1/451        | 21/23049  | 0.339767 | 0.518778 | 0.439469 | Bmp4        |
| GO_MF_mzGO:000454ribonucleic acid3/451     | 107/23049 | 0.348949 | 0.527549 | 0.446899 | Rnase6/Rp   |
| GO_MF_mzGO:001995cytokine binding3/451     | 107/23049 | 0.348949 | 0.527549 | 0.446899 | Agrrn/Cxcr1 |
| GO_MF_mzGO:001903GDP binding2/451          | 63/23049  | 0.350092 | 0.527549 | 0.446899 | Ralb/Ran    |
| GO_MF_mzGO:000098transcription1/451        | 22/23049  | 0.352698 | 0.527549 | 0.446899 | Lmx1b       |
| GO_MF_mzGO:000814poly(A) binding1/451      | 22/23049  | 0.352698 | 0.527549 | 0.446899 | Pabpn1      |
| GO_MF_mzGO:001527calcium-releasing1/451    | 22/23049  | 0.352698 | 0.527549 | 0.446899 | Tpcn1       |
| GO_MF_mzGO:001663oxidoreductase1/451       | 22/23049  | 0.352698 | 0.527549 | 0.446899 | Crym        |
| GO_MF_mzGO:004281Wnt-activator1/451        | 22/23049  | 0.352698 | 0.527549 | 0.446899 | Sfrp2       |
| GO_MF_mzGO:004802mRNA 5'-UTR1/451          | 22/23049  | 0.352698 | 0.527549 | 0.446899 | Aco1        |
| GO_MF_mzGO:007053K63-linked1/451           | 22/23049  | 0.352698 | 0.527549 | 0.446899 | Zbtb1       |
| GO_MF_mzGO:009048vitamin transporter1/451  | 22/23049  | 0.352698 | 0.527549 | 0.446899 | Slc52a3     |
| GO_MF_mzGO:014013catalytic activity1/451   | 22/23049  | 0.352698 | 0.527549 | 0.446899 | Mgat1       |
| GO_MF_mzGO:000107transcription7/451        | 294/23049 | 0.353367 | 0.527655 | 0.446989 | Atf4/Cebp   |
| GO_MF_mzGO:004693tetrapyrrole4/451         | 154/23049 | 0.355769 | 0.530343 | 0.449266 | Ambp/Cyb    |
| GO_MF_mzGO:003037ligand-degradation2/451   | 64/23049  | 0.357188 | 0.530662 | 0.449536 | Tsg101/Zc   |
| GO_MF_mzGO:005128NAD binding2/451          | 64/23049  | 0.357188 | 0.530662 | 0.449536 | Gpd1l/Sirt7 |
| GO_MF_mzGO:001673oxidoreductase5/451       | 202/23049 | 0.361733 | 0.535944 | 0.454011 | Cyp2g1/Fa   |
| GO_MF_mzGO:000817O-methyltransferase1/451  | 23/23049  | 0.365375 | 0.535944 | 0.454011 | Ftsj1       |
| GO_MF_mzGO:001692ligand-degradation1/451   | 23/23049  | 0.365375 | 0.535944 | 0.454011 | Jund        |
| GO_MF_mzGO:003143nucleosome1/451           | 23/23049  | 0.365375 | 0.535944 | 0.454011 | H3f3b       |
| GO_MF_mzGO:003361receptor signaling1/451   | 23/23049  | 0.365375 | 0.535944 | 0.454011 | Bmp4        |

|                                    |           |          |          |          |            |
|------------------------------------|-----------|----------|----------|----------|------------|
| GO_MF_mzGO:004339heparan su1/451   | 23/23049  | 0.365375 | 0.535944 | 0.454011 | Agrn       |
| GO_MF_mzGO:007183HMG box c1/451    | 23/23049  | 0.365375 | 0.535944 | 0.454011 | Cebpa      |
| GO_MF_mzGO:001920kinase regu5/451  | 203/23049 | 0.36561  | 0.535944 | 0.454011 | Angpt4/Ck  |
| GO_MF_mzGO:004362protein sel2/451  | 66/23049  | 0.371292 | 0.541041 | 0.458328 | Dyrk1a/Pat |
| GO_MF_mzGO:001701Ras GTPase9/451   | 397/23049 | 0.374483 | 0.541041 | 0.458328 | Cit/Dennd2 |
| GO_MF_mzGO:000006fatty-acyl-1/451  | 24/23049  | 0.377806 | 0.541041 | 0.458328 | Hmgcl      |
| GO_MF_mzGO:000163G-protein c1/451  | 24/23049  | 0.377806 | 0.541041 | 0.458328 | Cxcr1      |
| GO_MF_mzGO:000412cytochromc1/451   | 24/23049  | 0.377806 | 0.541041 | 0.458328 | Cox10      |
| GO_MF_mzGO:000495chemokine1/451    | 24/23049  | 0.377806 | 0.541041 | 0.458328 | Cxcr1      |
| GO_MF_mzGO:001500heme-cop1/451     | 24/23049  | 0.377806 | 0.541041 | 0.458328 | Cox10      |
| GO_MF_mzGO:001667oxidoreduc1/451   | 24/23049  | 0.377806 | 0.541041 | 0.458328 | Cox10      |
| GO_MF_mzGO:001995chemokine1/451    | 24/23049  | 0.377806 | 0.541041 | 0.458328 | Cxcr1      |
| GO_MF_mzGO:003054receptor in1/451  | 24/23049  | 0.377806 | 0.541041 | 0.458328 | Dkk4       |
| GO_MF_mzGO:003055cAMP bind1/451    | 24/23049  | 0.377806 | 0.541041 | 0.458328 | Prkar1a    |
| GO_MF_mzGO:003519miRNA bin1/451    | 24/23049  | 0.377806 | 0.541041 | 0.458328 | Hnrnpa2b1  |
| GO_MF_mzGO:004292neuropeptid1/451  | 24/23049  | 0.377806 | 0.541041 | 0.458328 | Gpr1       |
| GO_MF_mzGO:000098RNA polyr2/451    | 67/23049  | 0.378299 | 0.541041 | 0.458328 | H3f3b/Six3 |
| GO_MF_mzGO:003027clathrin bin2/451 | 67/23049  | 0.378299 | 0.541041 | 0.458328 | Ap2b1/Syt1 |
| GO_MF_mzGO:000372RNA helica2/451   | 68/23049  | 0.385272 | 0.548344 | 0.464515 | Ddx3y/Dhx  |
| GO_MF_mzGO:000400ATP-deper2/451    | 68/23049  | 0.385272 | 0.548344 | 0.464515 | Ddx3y/Dhx  |
| GO_MF_mzGO:003029protein kin2/451  | 68/23049  | 0.385272 | 0.548344 | 0.464515 | Angpt4/Ck  |
| GO_MF_mzGO:001507proton trar3/451  | 114/23049 | 0.386235 | 0.548783 | 0.464887 | Atp6v1h/C  |
| GO_MF_mzGO:001713Rab GTPas4/451    | 161/23049 | 0.386827 | 0.548783 | 0.464887 | Dennd2a/F  |
| GO_MF_mzGO:001667oxidoreduc1/451   | 25/23049  | 0.389993 | 0.550615 | 0.466439 | Cox10      |
| GO_MF_mzGO:001684phosphoru1/451    | 25/23049  | 0.389993 | 0.550615 | 0.466439 | Gucy2c     |
| GO_MF_mzGO:001689endoribonuc1/451  | 25/23049  | 0.389993 | 0.550615 | 0.466439 | Rpp38      |
| GO_MF_mzGO:000818RNA-depe2/451     | 69/23049  | 0.392211 | 0.552861 | 0.468341 | Ddx3y/Dhx  |
| GO_MF_mzGO:000508Rho guany2/451    | 70/23049  | 0.399115 | 0.558534 | 0.473147 | Ect2/Farp2 |
| GO_MF_mzGO:009711scaffold prc2/451 | 70/23049  | 0.399115 | 0.558534 | 0.473147 | Cit/Kcnh2  |
| GO_MF_mzGO:000378actin monoc1/451  | 26/23049  | 0.401942 | 0.558534 | 0.473147 | Twf1       |
| GO_MF_mzGO:000467AMP-activ1/451    | 26/23049  | 0.401942 | 0.558534 | 0.473147 | Stk-ps2    |
| GO_MF_mzGO:000515insulin rece1/451 | 26/23049  | 0.401942 | 0.558534 | 0.473147 | Shc1       |
| GO_MF_mzGO:000535glucose tra1/451  | 26/23049  | 0.401942 | 0.558534 | 0.473147 | Mfsd4b3    |
| GO_MF_mzGO:000997cyclase acti1/451 | 26/23049  | 0.401942 | 0.558534 | 0.473147 | Gucy2c     |
| GO_MF_mzGO:001702TBP-class r1/451  | 26/23049  | 0.401942 | 0.558534 | 0.473147 | Psmc5      |
| GO_MF_mzGO:001713fibroblast c1/451 | 26/23049  | 0.401942 | 0.558534 | 0.473147 | Fgfbp3     |
| GO_MF_mzGO:004830calcium-de2/451   | 71/23049  | 0.405982 | 0.56326  | 0.47715  | Grm7/Tsg1  |
| GO_MF_mzGO:003016PDZ domai3/451    | 118/23049 | 0.407325 | 0.564235 | 0.477977 | Cit/Grm7/L |
| GO_MF_mzGO:000520structural c2/451 | 72/23049  | 0.412811 | 0.565011 | 0.478634 | Frmd6/Tub  |
| GO_MF_mzGO:000905electron trc2/451 | 72/23049  | 0.412811 | 0.565011 | 0.478634 | Cox10/Cyb  |
| GO_MF_mzGO:000468calmodulin1/451   | 27/23049  | 0.413657 | 0.565011 | 0.478634 | Ptk2b      |
| GO_MF_mzGO:000514prolactin rc1/451 | 27/23049  | 0.413657 | 0.565011 | 0.478634 | Prl8a2     |
| GO_MF_mzGO:001514hexose trar1/451  | 27/23049  | 0.413657 | 0.565011 | 0.478634 | Mfsd4b3    |
| GO_MF_mzGO:001664oxidoreduc1/451   | 27/23049  | 0.413657 | 0.565011 | 0.478634 | Crym       |
| GO_MF_mzGO:001689exoribonuc1/451   | 27/23049  | 0.413657 | 0.565011 | 0.478634 | Xrn1       |
| GO_MF_mzGO:003074GTP-deper1/451    | 27/23049  | 0.413657 | 0.565011 | 0.478634 | Gchfr      |
| GO_MF_mzGO:190468peptide tra1/451  | 27/23049  | 0.413657 | 0.565011 | 0.478634 | Tomm20     |
| GO_MF_mzGO:000850anion trans7/451  | 316/23049 | 0.42356  | 0.574465 | 0.486643 | Slc6a21/Gc |

|                                      |           |          |          |          |             |
|--------------------------------------|-----------|----------|----------|----------|-------------|
| GO_MF_mzGO:000453exoribonuc1/451     | 28/23049  | 0.425144 | 0.574465 | 0.486643 | Xrn1        |
| GO_MF_mzGO:00083C structural c1/451  | 28/23049  | 0.425144 | 0.574465 | 0.486643 | Myh11       |
| GO_MF_mzGO:00167C oxidoreduc1/451    | 28/23049  | 0.425144 | 0.574465 | 0.486643 | Ado         |
| GO_MF_mzGO:003029 protein ser1/451   | 28/23049  | 0.425144 | 0.574465 | 0.486643 | Prkar1a     |
| GO_MF_mzGO:004353 protein ser1/451   | 28/23049  | 0.425144 | 0.574465 | 0.486643 | Cks1b       |
| GO_MF_mzGO:00996C ligand-gatr1/451   | 28/23049  | 0.425144 | 0.574465 | 0.486643 | Tpcn1       |
| GO_MF_mzGO:000823 serine-type5/451   | 219/23049 | 0.427484 | 0.576422 | 0.4883   | Pcsk2/Plau  |
| GO_MF_mzGO:00192C kinase activ2/451  | 75/23049  | 0.433058 | 0.576422 | 0.4883   | Angpt4/Ck   |
| GO_MF_mzGO:003329 monocarb2/451      | 75/23049  | 0.433058 | 0.576422 | 0.4883   | Acaca/Fabp  |
| GO_MF_mzGO:00154C P-P-bond-3/451     | 123/23049 | 0.433371 | 0.576422 | 0.4883   | Atp6v1h/lp  |
| GO_MF_mzGO:001507 monovalen8/451     | 369/23049 | 0.434624 | 0.576422 | 0.4883   | Atp6v1h/C   |
| GO_MF_mzGO:00044C histone de1/451    | 29/23049  | 0.436405 | 0.576422 | 0.4883   | Sirt7       |
| GO_MF_mzGO:000524 calcium ch1/451    | 29/23049  | 0.436405 | 0.576422 | 0.4883   | Grm7        |
| GO_MF_mzGO:001514 monosacch1/451     | 29/23049  | 0.436405 | 0.576422 | 0.4883   | Mfsd4b3     |
| GO_MF_mzGO:00167C oxidoreduc1/451    | 29/23049  | 0.436405 | 0.576422 | 0.4883   | Ado         |
| GO_MF_mzGO:003051 snoRNA bil1/451    | 29/23049  | 0.436405 | 0.576422 | 0.4883   | Pwp2        |
| GO_MF_mzGO:003644 proton-ex1/451     | 29/23049  | 0.436405 | 0.576422 | 0.4883   | Atp6v1h     |
| GO_MF_mzGO:004301 gamma-tu1/451      | 29/23049  | 0.436405 | 0.576422 | 0.4883   | Bloc1s2     |
| GO_MF_mzGO:00455C dynein ligh1/451   | 29/23049  | 0.436405 | 0.576422 | 0.4883   | Glul        |
| GO_MF_mzGO:007071 poly-purin1/451    | 29/23049  | 0.436405 | 0.576422 | 0.4883   | Pabpn1      |
| GO_MF_mzGO:00725C divalent inc1/451  | 29/23049  | 0.436405 | 0.576422 | 0.4883   | Slc25a28    |
| GO_MF_mzGO:000823 metallope4/451     | 173/23049 | 0.439516 | 0.579661 | 0.491045 | Mbtps2/Mt   |
| GO_MF_mzGO:001539 primary act3/451   | 125/23049 | 0.443673 | 0.584269 | 0.494948 | Atp6v1h/lp  |
| GO_MF_mzGO:004317 alcohol bin2/451   | 77/23049  | 0.446347 | 0.585737 | 0.496192 | Cdipt/Osbr  |
| GO_MF_mzGO:001717 serine hydr5/451   | 224/23049 | 0.446624 | 0.585737 | 0.496192 | Pcsk2/Plau  |
| GO_MF_mzGO:003355 protein de1/451    | 30/23049  | 0.447447 | 0.585737 | 0.496192 | Sirt7       |
| GO_MF_mzGO:005111 sugar trans1/451   | 30/23049  | 0.447447 | 0.585737 | 0.496192 | Mfsd4b3     |
| GO_MF_mzGO:00055C iron ion bir4/451  | 175/23049 | 0.448183 | 0.585829 | 0.49627  | Fth117f/Jmj |
| GO_MF_mzGO:001624 channel rec3/451   | 127/23049 | 0.453902 | 0.590064 | 0.499857 | Rack1/Gpd   |
| GO_MF_mzGO:014003 modificatic3/451   | 127/23049 | 0.453902 | 0.590064 | 0.499857 | Rrp8/Suz12  |
| GO_MF_mzGO:004262 ATPase act8/451    | 377/23049 | 0.458226 | 0.590064 | 0.499857 | Atp6v1h/C   |
| GO_MF_mzGO:00040C ATP-deper1/451     | 31/23049  | 0.458273 | 0.590064 | 0.499857 | Recql       |
| GO_MF_mzGO:000513 type I inter1/451  | 31/23049  | 0.458273 | 0.590064 | 0.499857 | Ifna4       |
| GO_MF_mzGO:00082C ion channe1/451    | 31/23049  | 0.458273 | 0.590064 | 0.499857 | Rack1       |
| GO_MF_mzGO:001714 Wnt-prote1/451     | 31/23049  | 0.458273 | 0.590064 | 0.499857 | Sfrp2       |
| GO_MF_mzGO:004323 laminin bin1/451   | 31/23049  | 0.458273 | 0.590064 | 0.499857 | Adgrg6      |
| GO_MF_mzGO:004687 ephrin rece1/451   | 31/23049  | 0.458273 | 0.590064 | 0.499857 | Shc1        |
| GO_MF_mzGO:006198 regulatory1/451    | 31/23049  | 0.458273 | 0.590064 | 0.499857 | Hnrnpa2b1   |
| GO_MF_mzGO:001712 SH3 domai3/451     | 128/23049 | 0.458987 | 0.590064 | 0.499857 | Cit/Itgb1bp |
| GO_MF_mzGO:004633 SMAD binc2/451     | 79/23049  | 0.45946  | 0.590064 | 0.499857 | Ipo7/Tgfb1  |
| GO_MF_mzGO:000122 transcriptic9/451  | 428/23049 | 0.460578 | 0.590639 | 0.500345 | Atf4/Cdc5l  |
| GO_MF_mzGO:005083 cell adhesio10/451 | 480/23049 | 0.465138 | 0.594637 | 0.503731 | Caml/Eif5f  |
| GO_MF_mzGO:001653 cyclin-depr1/451   | 32/23049  | 0.468887 | 0.594637 | 0.503731 | Cks1b       |
| GO_MF_mzGO:001689 endonucle1/451     | 32/23049  | 0.468887 | 0.594637 | 0.503731 | Rpp38       |
| GO_MF_mzGO:004476 ATPase act1/451    | 32/23049  | 0.468887 | 0.594637 | 0.503731 | Atp6v1h     |
| GO_MF_mzGO:00455C dynein inte1/451   | 32/23049  | 0.468887 | 0.594637 | 0.503731 | Ran         |
| GO_MF_mzGO:007027 phosphatic1/451    | 32/23049  | 0.468887 | 0.594637 | 0.503731 | Osbp15      |
| GO_MF_mzGO:000377 motor activ3/451   | 130/23049 | 0.469095 | 0.594637 | 0.503731 | Myh11/My    |

|                                    |           |          |          |          |             |
|------------------------------------|-----------|----------|----------|----------|-------------|
| GO_MF_mzGO:000451endonuclea3/451   | 130/23049 | 0.469095 | 0.594637 | 0.503731 | Rnase6/Rp   |
| GO_MF_mzGO:000823cysteine-ty4/451  | 182/23049 | 0.478161 | 0.602365 | 0.510278 | Capn15/Ca   |
| GO_MF_mzGO:001677nucleotidyl3/451  | 132/23049 | 0.479118 | 0.602365 | 0.510278 | Gdpgp1/O    |
| GO_MF_mzGO:001624channel in1/451   | 33/23049  | 0.479294 | 0.602365 | 0.510278 | Rack1       |
| GO_MF_mzGO:005101mitogen-a1/451    | 33/23049  | 0.479294 | 0.602365 | 0.510278 | Nbr1        |
| GO_MF_mzGO:005139alpha-actin1/451  | 33/23049  | 0.479294 | 0.602365 | 0.510278 | Nrap        |
| GO_MF_mzGO:190156fatty acid d1/451 | 33/23049  | 0.479294 | 0.602365 | 0.510278 | Hmgcl       |
| GO_MF_mzGO:000808phosphoric2/451   | 83/23049  | 0.485133 | 0.607105 | 0.514293 | Pde1a/Pde   |
| GO_MF_mzGO:001681hydrolase e2/451  | 83/23049  | 0.485133 | 0.607105 | 0.514293 | Pm20d2/Si   |
| GO_MF_mzGO:003294protein-co2/451   | 83/23049  | 0.485133 | 0.607105 | 0.514293 | Sept9/Sma   |
| GO_MF_mzGO:000166G-protein i6/451  | 286/23049 | 0.489105 | 0.609106 | 0.515988 | Bambi/Pen   |
| GO_MF_mzGO:003376steroid de1/451   | 34/23049  | 0.489497 | 0.609106 | 0.515988 | Sdr42e1     |
| GO_MF_mzGO:003503histone ac1/451   | 34/23049  | 0.489497 | 0.609106 | 0.515988 | Nr4a3       |
| GO_MF_mzGO:003603pre-mRNA1/451     | 34/23049  | 0.489497 | 0.609106 | 0.515988 | Hnrnpa2b1   |
| GO_MF_mzGO:009913ion channe2/451   | 84/23049  | 0.491432 | 0.610652 | 0.517297 | Rack1/Grm   |
| GO_MF_mzGO:000804enzyme ac9/451    | 441/23049 | 0.496226 | 0.612898 | 0.5192   | Angpt4/Ar   |
| GO_MF_mzGO:000827protein me2/451   | 85/23049  | 0.497683 | 0.612898 | 0.5192   | Eef1akmt2/  |
| GO_MF_mzGO:001681hydrolase e3/451  | 136/23049 | 0.498893 | 0.612898 | 0.5192   | Cad/Pm20c   |
| GO_MF_mzGO:000373structural c4/451 | 187/23049 | 0.499186 | 0.612898 | 0.5192   | Mrps5/Mrt   |
| GO_MF_mzGO:000113transcripti1/451  | 35/23049  | 0.499501 | 0.612898 | 0.5192   | Cdc5l       |
| GO_MF_mzGO:000515epidermal i1/451  | 35/23049  | 0.499501 | 0.612898 | 0.5192   | Shc1        |
| GO_MF_mzGO:000839arachidonic1/451  | 35/23049  | 0.499501 | 0.612898 | 0.5192   | Cyp2g1      |
| GO_MF_mzGO:004216telomeric L1/451  | 35/23049  | 0.499501 | 0.612898 | 0.5192   | Hnrnpa2b1   |
| GO_MF_mzGO:005172protein ph1/451   | 35/23049  | 0.499501 | 0.612898 | 0.5192   | Shc1        |
| GO_MF_mzGO:000486protein kin2/451  | 86/23049  | 0.503884 | 0.617416 | 0.523028 | Rack1/Prka  |
| GO_MF_mzGO:000375peptidyl-p1/451   | 36/23049  | 0.509309 | 0.622332 | 0.527192 | Ppib        |
| GO_MF_mzGO:001677phosphotr1/451    | 36/23049  | 0.509309 | 0.622332 | 0.527192 | Ak8         |
| GO_MF_mzGO:003509phosphatic5/451   | 242/23049 | 0.513925 | 0.627102 | 0.531233 | Arap3/Chr   |
| GO_MF_mzGO:000425serine-type4/451  | 191/23049 | 0.515739 | 0.627124 | 0.531252 | Pcsk2/Plau. |
| GO_MF_mzGO:000817N-methyltr2/451   | 88/23049  | 0.516137 | 0.627124 | 0.531252 | Eef1akmt2/  |
| GO_MF_mzGO:004302ribonucleo3/451   | 140/23049 | 0.518282 | 0.627124 | 0.531252 | Rack1/Prpf  |
| GO_MF_mzGO:001708sodium ch1/451    | 37/23049  | 0.518926 | 0.627124 | 0.531252 | Gpd1l       |
| GO_MF_mzGO:003162ubiquitin c1/451  | 37/23049  | 0.518926 | 0.627124 | 0.531252 | Tollip      |
| GO_MF_mzGO:004216SH2 domai1/451    | 37/23049  | 0.518926 | 0.627124 | 0.531252 | Rack1       |
| GO_MF_mzGO:004353ADP bindir1/451   | 37/23049  | 0.518926 | 0.627124 | 0.531252 | Hist1h1e    |
| GO_MF_mzGO:000372single-strai2/451 | 89/23049  | 0.522188 | 0.629124 | 0.532946 | Jmjd6/Pab1  |
| GO_MF_mzGO:001921kinase inhil2/451 | 89/23049  | 0.522188 | 0.629124 | 0.532946 | Rack1/Prka  |
| GO_MF_mzGO:000513frizzled bin1/451 | 38/23049  | 0.528354 | 0.629124 | 0.532946 | Bambi       |
| GO_MF_mzGO:000548SNAP recej1/451   | 38/23049  | 0.528354 | 0.629124 | 0.532946 | Vamp3       |
| GO_MF_mzGO:000839arachidonic1/451  | 38/23049  | 0.528354 | 0.629124 | 0.532946 | Cyp2g1      |
| GO_MF_mzGO:001685cis-trans is1/451 | 38/23049  | 0.528354 | 0.629124 | 0.532946 | Ppib        |
| GO_MF_mzGO:004205chemoattr1/451    | 38/23049  | 0.528354 | 0.629124 | 0.532946 | Bmp4        |
| GO_MF_mzGO:0051534 iron, 4 su1/451 | 38/23049  | 0.528354 | 0.629124 | 0.532946 | Aco1        |
| GO_MF_mzGO:006059ATPase rec1/451   | 38/23049  | 0.528354 | 0.629124 | 0.532946 | Agrn        |
| GO_MF_mzGO:190156carbohydr1/451    | 38/23049  | 0.528354 | 0.629124 | 0.532946 | Slc35a4     |
| GO_MF_mzGO:000509GTPase act5/451   | 246/23049 | 0.528436 | 0.629124 | 0.532946 | Arap3/Ect2  |
| GO_MF_mzGO:001529symporter 3/451   | 143/23049 | 0.532555 | 0.630657 | 0.534245 | Mfsd4b3/S   |
| GO_MF_mzGO:000553glycosamin4/451   | 196/23049 | 0.536067 | 0.630657 | 0.534245 | Agrn/Aplp:  |



|                                      |           |          |          |          |             |
|--------------------------------------|-----------|----------|----------|----------|-------------|
| GO_MF_mzGO:000819UDP-glyco 3/451     | 144/23049 | 0.537259 | 0.630657 | 0.534245 | Galnt2/Lfnq |
| GO_MF_mzGO:00012C transcriptic 1/451 | 39/23049  | 0.537598 | 0.630657 | 0.534245 | Six3        |
| GO_MF_mzGO:00017E phosphoty 1/451    | 39/23049  | 0.537598 | 0.630657 | 0.534245 | Shc1        |
| GO_MF_mzGO:00154E cholesterol 1/451  | 39/23049  | 0.537598 | 0.630657 | 0.534245 | Osbpl5      |
| GO_MF_mzGO:00159E nucleobase 1/451   | 39/23049  | 0.537598 | 0.630657 | 0.534245 | Slc35a4     |
| GO_MF_mzGO:00162E steroid def 1/451  | 39/23049  | 0.537598 | 0.630657 | 0.534245 | Sdr42e1     |
| GO_MF_mzGO:00428E amide tran 1/451   | 39/23049  | 0.537598 | 0.630657 | 0.534245 | Tomm20      |
| GO_MF_mzGO:00433E proteoglyc 1/451   | 39/23049  | 0.537598 | 0.630657 | 0.534245 | Agrn        |
| GO_MF_mzGO:004691 transition n 1/451 | 39/23049  | 0.537598 | 0.630657 | 0.534245 | Slc25a28    |
| GO_MF_mzGO:00605E nucleoside 6/451   | 301/23049 | 0.538823 | 0.631254 | 0.53475  | Agrn/Arap   |
| GO_MF_mzGO:00082C heparin bir 3/451  | 145/23049 | 0.541937 | 0.634059 | 0.537126 | Aplp2/Bmp   |
| GO_MF_mzGO:00349E immunoglc 3/451    | 146/23049 | 0.546587 | 0.637892 | 0.540373 | Ighv1-23/I  |
| GO_MF_mzGO:001921 deacetylase 1/451  | 40/23049  | 0.546661 | 0.637892 | 0.540373 | Sirt7       |
| GO_MF_mzGO:00430E cysteine-ty 1/451  | 41/23049  | 0.555547 | 0.646176 | 0.547391 | Rack1       |
| GO_MF_mzGO:00484E beta-tubul 1/451   | 41/23049  | 0.555547 | 0.646176 | 0.547391 | Syt11       |
| GO_MF_mzGO:000451 nuclease a 4/451   | 201/23049 | 0.555596 | 0.646176 | 0.547391 | Rnase6/Rp   |
| GO_MF_mzGO:000367 DNA helica 1/451   | 42/23049  | 0.564259 | 0.654095 | 0.554099 | Recql       |
| GO_MF_mzGO:00150E disulfide o 1/451  | 42/23049  | 0.564259 | 0.654095 | 0.554099 | Txndc17     |
| GO_MF_mzGO:00156E tubulin bin 6/451  | 311/23049 | 0.570786 | 0.656226 | 0.555904 | Bloc1s2/Cl  |
| GO_MF_mzGO:00046C peroxidase 1/451   | 43/23049  | 0.572801 | 0.656226 | 0.555904 | Txndc17     |
| GO_MF_mzGO:00052C extracellula 1/451 | 43/23049  | 0.572801 | 0.656226 | 0.555904 | Col2a1      |
| GO_MF_mzGO:00055C fatty acid b 1/451 | 43/23049  | 0.572801 | 0.656226 | 0.555904 | Fabp6       |
| GO_MF_mzGO:00192C nucleobase 1/451   | 43/23049  | 0.572801 | 0.656226 | 0.555904 | Ak8         |
| GO_MF_mzGO:00329E sterol bindi 1/451 | 43/23049  | 0.572801 | 0.656226 | 0.555904 | Osbpl5      |
| GO_MF_mzGO:00428C actinin bin 1/451  | 43/23049  | 0.572801 | 0.656226 | 0.555904 | Nrap        |
| GO_MF_mzGO:00443E ubiquitin-li 1/451 | 43/23049  | 0.572801 | 0.656226 | 0.555904 | Tollip      |
| GO_MF_mzGO:00506E NADP bind 1/451    | 43/23049  | 0.572801 | 0.656226 | 0.555904 | Crym        |
| GO_MF_mzGO:00042E metalloenc 2/451   | 99/23049  | 0.579853 | 0.663233 | 0.56184  | Mbtps2/Tll  |
| GO_MF_mzGO:00167E exonucleas 1/451   | 44/23049  | 0.581175 | 0.663233 | 0.56184  | Xrn1        |
| GO_MF_mzGO:00180E histone-lys 1/451  | 44/23049  | 0.581175 | 0.663233 | 0.56184  | Suz12       |
| GO_MF_mzGO:00306E GTPase rec 5/451   | 263/23049 | 0.587801 | 0.669926 | 0.56751  | Arap3/Ect2  |
| GO_MF_mzGO:00167C oxidoreduc 1/451   | 45/23049  | 0.589386 | 0.670865 | 0.568305 | Jmjd6       |
| GO_MF_mzGO:000837 acetylgalac 1/451  | 46/23049  | 0.597436 | 0.67915  | 0.575324 | Galnt2      |
| GO_MF_mzGO:00166E oxidoreduc 1/451   | 47/23049  | 0.605329 | 0.685658 | 0.580837 | Txndc17     |
| GO_MF_mzGO:00314E nucleosom 1/451    | 47/23049  | 0.605329 | 0.685658 | 0.580837 | H3f3b       |
| GO_MF_mzGO:00228C active tran 7/451  | 376/23049 | 0.605496 | 0.685658 | 0.580837 | Atp6v1h/V   |
| GO_MF_mzGO:001704 Rho GTPas 3/451    | 161/23049 | 0.612892 | 0.689799 | 0.584345 | Cit/Ect2/Fa |
| GO_MF_mzGO:00017E phosphatic 1/451   | 48/23049  | 0.613067 | 0.689799 | 0.584345 | Osbpl5      |
| GO_MF_mzGO:000487 nuclear rec 1/451  | 48/23049  | 0.613067 | 0.689799 | 0.584345 | Nr4a3       |
| GO_MF_mzGO:00315E polyubiquit 1/451  | 48/23049  | 0.613067 | 0.689799 | 0.584345 | Zbtb1       |
| GO_MF_mzGO:00985E transcriptic 1/451 | 48/23049  | 0.613067 | 0.689799 | 0.584345 | Nr4a3       |
| GO_MF_mzGO:00198E kinesin bin 1/451  | 49/23049  | 0.620654 | 0.696508 | 0.590028 | Crocc       |
| GO_MF_mzGO:00037C transcriptic 2/451 | 107/23049 | 0.622193 | 0.696508 | 0.590028 | Cebpa/SixE  |
| GO_MF_mzGO:00045E hydrolase 2/451    | 107/23049 | 0.622193 | 0.696508 | 0.590028 | Gba2/Man    |
| GO_MF_mzGO:00425E hormone b 2/451    | 107/23049 | 0.622193 | 0.696508 | 0.590028 | Crym/Shc1   |
| GO_MF_mzGO:00453C protein ph 1/451   | 50/23049  | 0.628093 | 0.702221 | 0.594868 | Shc1        |
| GO_MF_mzGO:00054E steroid bin 2/451  | 109/23049 | 0.63225  | 0.705006 | 0.597227 | Osbpl5/Scq  |
| GO_MF_mzGO:004687 metal ion t 8/451  | 441/23049 | 0.634934 | 0.705006 | 0.597227 | Grm7/Kcne   |

|                   |              |       |           |          |          |          |            |
|-------------------|--------------|-------|-----------|----------|----------|----------|------------|
| GO_MF_mzGO:000154 | amyloid-b    | 1/451 | 51/23049  | 0.635386 | 0.705006 | 0.597227 | Bace1      |
| GO_MF_mzGO:000532 | neurotrans   | 1/451 | 51/23049  | 0.635386 | 0.705006 | 0.597227 | Slc25a38   |
| GO_MF_mzGO:000554 | calcium-de   | 1/451 | 51/23049  | 0.635386 | 0.705006 | 0.597227 | Syt11      |
| GO_MF_mzGO:001686 | intramolec   | 1/451 | 51/23049  | 0.635386 | 0.705006 | 0.597227 | Txndc5     |
| GO_MF_mzGO:000119 | transcripti  | 1/451 | 53/23049  | 0.649546 | 0.717106 | 0.607477 | Id2        |
| GO_MF_mzGO:000452 | endoribont   | 1/451 | 53/23049  | 0.649546 | 0.717106 | 0.607477 | Rpp38      |
| GO_MF_mzGO:002282 | transmitter  | 1/451 | 53/23049  | 0.649546 | 0.717106 | 0.607477 | Ptk2b      |
| GO_MF_mzGO:002283 | transmitter  | 1/451 | 53/23049  | 0.649546 | 0.717106 | 0.607477 | Ptk2b      |
| GO_MF_mzGO:001688 | ATPase act   | 8/451 | 449/23049 | 0.654717 | 0.72191  | 0.611547 | Atp6v1h/C  |
| GO_MF_mzGO:000526 | calcium ch   | 2/451 | 115/23049 | 0.661165 | 0.728108 | 0.616797 | Grm7/Tpcc  |
| GO_MF_mzGO:000802 | monocarb     | 1/451 | 55/23049  | 0.663158 | 0.729391 | 0.617884 | Slc27a2    |
| GO_MF_mzGO:000554 | phospholip   | 1/451 | 56/23049  | 0.669765 | 0.735508 | 0.623066 | Osbp15     |
| GO_MF_mzGO:004262 | ATPase act   | 2/451 | 117/23049 | 0.670389 | 0.735508 | 0.623066 | Atp6v1h/lp |
| GO_MF_mzGO:005101 | actin filam  | 3/451 | 177/23049 | 0.676093 | 0.738252 | 0.625391 | Myh11/Syr  |
| GO_MF_mzGO:001662 | oxidoreduc   | 1/451 | 57/23049  | 0.676242 | 0.738252 | 0.625391 | lvd        |
| GO_MF_mzGO:003559 | signaling a  | 1/451 | 57/23049  | 0.676242 | 0.738252 | 0.625391 | Rack1      |
| GO_MF_mzGO:004205 | histone me   | 1/451 | 57/23049  | 0.676242 | 0.738252 | 0.625391 | Suz12      |
| GO_MF_mzGO:000486 | serine-type  | 2/451 | 119/23049 | 0.67941  | 0.740792 | 0.627542 | Ambp/Serq  |
| GO_MF_mzGO:000373 | steroid hor  | 1/451 | 58/23049  | 0.682593 | 0.74151  | 0.62815  | Nr4a3      |
| GO_MF_mzGO:004302 | ribosome t   | 1/451 | 58/23049  | 0.682593 | 0.74151  | 0.62815  | Rack1      |
| GO_MF_mzGO:005084 | extracellula | 1/451 | 58/23049  | 0.682593 | 0.74151  | 0.62815  | Adgrg6     |
| GO_MF_mzGO:000368 | damaged [    | 1/451 | 60/23049  | 0.694924 | 0.753975 | 0.63871  | H2afx      |
| GO_MF_mzGO:000531 | lipid transp | 2/451 | 123/23049 | 0.696846 | 0.755131 | 0.639689 | Osbp15/Slc |
| GO_MF_mzGO:006113 | peptidase r  | 4/451 | 242/23049 | 0.699904 | 0.757513 | 0.641707 | Ambp/Racl  |
| GO_MF_mzGO:001671 | oxidoreduc   | 1/451 | 61/23049  | 0.700909 | 0.75767  | 0.64184  | Cyp2g1     |
| GO_MF_mzGO:004748 | protein N-   | 2/451 | 126/23049 | 0.709402 | 0.765911 | 0.648821 | Pdcd10/St  |
| GO_MF_mzGO:001676 | transferase  | 1/451 | 63/23049  | 0.71253  | 0.768346 | 0.650884 | Cox10      |
| GO_MF_mzGO:001529 | secondary    | 4/451 | 247/23049 | 0.714939 | 0.769718 | 0.652046 | Mfsd4b3/S  |
| GO_MF_mzGO:001982 | cation-trar  | 1/451 | 64/23049  | 0.71817  | 0.769718 | 0.652046 | Atp6v1h    |
| GO_MF_mzGO:002285 | active ion   | t/451 | 64/23049  | 0.71817  | 0.769718 | 0.652046 | Atp6v1h    |
| GO_MF_mzGO:004262 | ATPase cot   | 1/451 | 64/23049  | 0.71817  | 0.769718 | 0.652046 | Atp6v1h    |
| GO_MF_mzGO:004836 | Rac GTPas    | 1/451 | 64/23049  | 0.71817  | 0.769718 | 0.652046 | Farp2      |
| GO_MF_mzGO:005153 | iron-sulfur  | 1/451 | 65/23049  | 0.7237   | 0.773762 | 0.655472 | Aco1       |
| GO_MF_mzGO:005154 | metal clust  | 1/451 | 65/23049  | 0.7237   | 0.773762 | 0.655472 | Aco1       |
| GO_MF_mzGO:004237 | chemokine    | 1/451 | 66/23049  | 0.729122 | 0.778614 | 0.659582 | S100a14    |
| GO_MF_mzGO:000107 | transcripti  | 3/451 | 193/23049 | 0.731353 | 0.780051 | 0.660799 | Cdc5l/Id2/ |
| GO_MF_mzGO:004349 | ATPase act   | 2/451 | 132/23049 | 0.733213 | 0.781089 | 0.661679 | Atp6v1h/lp |
| GO_MF_mzGO:001702 | myosin bin   | 1/451 | 68/23049  | 0.739649 | 0.786993 | 0.66668  | Rab11a     |
| GO_MF_mzGO:001679 | hydrolase    | 2/451 | 134/23049 | 0.740773 | 0.787239 | 0.666889 | Gba2/Man1  |
| GO_MF_mzGO:001661 | oxidoreduc   | 2/451 | 135/23049 | 0.744484 | 0.79023  | 0.669422 | Gpd1l/Sdr4 |
| GO_MF_mzGO:000452 | exonucleas   | 1/451 | 70/23049  | 0.749767 | 0.793924 | 0.672552 | Xrn1       |
| GO_MF_mzGO:001984 | rRNA bindi   | 1/451 | 70/23049  | 0.749767 | 0.793924 | 0.672552 | Fastkd2    |
| GO_MF_mzGO:001508 | calcium ior  | 2/451 | 137/23049 | 0.75177  | 0.79509  | 0.673539 | Grm7/Tpcc  |
| GO_MF_mzGO:000523 | extracellula | 1/451 | 71/23049  | 0.754678 | 0.797208 | 0.675334 | Ptk2b      |
| GO_MF_mzGO:000839 | steroid hyc  | 1/451 | 73/23049  | 0.764214 | 0.806315 | 0.683048 | Cyp2g1     |
| GO_MF_mzGO:000098 | transcripti  | 7/451 | 446/23049 | 0.772519 | 0.813072 | 0.688772 | Atf4/Cebp  |
| GO_MF_mzGO:000203 | p53 bindin   | 1/451 | 75/23049  | 0.77338  | 0.813072 | 0.688772 | Rnf20      |
| GO_MF_mzGO:006113 | endopeptic   | 3/451 | 207/23049 | 0.773387 | 0.813072 | 0.688772 | Ambp/Serq  |

|                                                   |           |          |          |          |             |
|---------------------------------------------------|-----------|----------|----------|----------|-------------|
| GO_MF_mzGO:001529 antiporter ;1/451               | 76/23049  | 0.777829 | 0.816767 | 0.691902 | Slc7a10     |
| GO_MF_mzGO:000449 monooxygenase 2/451             | 146/23049 | 0.78238  | 0.820567 | 0.695122 | Cyp2g1/Pc   |
| GO_MF_mzGO:001685 isomerase ;2/451                | 147/23049 | 0.785568 | 0.822932 | 0.697125 | Ppib/Txndc  |
| GO_MF_mzGO:000382 antigen binding 3/451           | 213/23049 | 0.789683 | 0.825321 | 0.699149 | Ighv1-23/Ig |
| GO_MF_mzGO:000554 phospholipase 6/451             | 396/23049 | 0.789732 | 0.825321 | 0.699149 | Arap3/Chr   |
| GO_MF_mzGO:007040 ammonium ion transport 1/451    | 79/23049  | 0.790659 | 0.825321 | 0.699149 | Chmp3       |
| GO_MF_mzGO:000484 thiol-depehydrogenase 1/451     | 80/23049  | 0.794769 | 0.828629 | 0.701951 | Usp17le     |
| GO_MF_mzGO:000108 RNA polymerase 2/451            | 151/23049 | 0.797915 | 0.829884 | 0.703015 | Atf4/Id2    |
| GO_MF_mzGO:001661 oxidoreductase 2/451            | 151/23049 | 0.797915 | 0.829884 | 0.703015 | Gpd1l/Sdr4  |
| GO_MF_mzGO:001620 antioxidant 1/451               | 81/23049  | 0.798799 | 0.829884 | 0.703015 | Txndc17     |
| GO_MF_mzGO:003321 amide biosynthesis 5/451        | 341/23049 | 0.799792 | 0.829937 | 0.703059 | Acaca/Bace  |
| GO_MF_mzGO:000801 beta-catenin 1/451              | 85/23049  | 0.814144 | 0.843394 | 0.714459 | Foxo4       |
| GO_MF_mzGO:000801 microtubule binding 3/451       | 223/23049 | 0.814675 | 0.843394 | 0.714459 | Clip2/Eml3  |
| GO_MF_mzGO:000525 anion channel 1/451             | 86/23049  | 0.817794 | 0.84563  | 0.716353 | Gpr89       |
| GO_MF_mzGO:007234 modified amino acid 1/451       | 89/23049  | 0.828321 | 0.855511 | 0.724723 | Osbpl5      |
| GO_MF_mzGO:000555 pheromone receptor 1/451        | 90/23049  | 0.831693 | 0.856984 | 0.725971 | Vmn1r215    |
| GO_MF_mzGO:005108 unfolded protein response 1/451 | 90/23049  | 0.831693 | 0.856984 | 0.725971 | Tomm20      |
| GO_MF_mzGO:003645 thiol-depehydrogenase 1/451     | 95/23049  | 0.847588 | 0.871325 | 0.73812  | Usp17le     |
| GO_MF_mzGO:010100 ubiquitinylated protein 1/451   | 95/23049  | 0.847588 | 0.871325 | 0.73812  | Usp17le     |
| GO_MF_mzGO:004227 peptide binding 4/451           | 306/23049 | 0.852094 | 0.874936 | 0.741179 | Bace1/Gpr   |
| GO_MF_mzGO:001650 pheromone receptor 1/451        | 99/23049  | 0.859219 | 0.881225 | 0.746506 | Vmn1r215    |
| GO_MF_mzGO:006009 molecular chaperone 2/451       | 178/23049 | 0.865926 | 0.885448 | 0.750084 | Arrdc1/Rac  |
| GO_MF_mzGO:000110 RNA polymerase 1/451            | 102/23049 | 0.867357 | 0.885448 | 0.750084 | Thrap3      |
| GO_MF_mzGO:000369 single-strand binding 1/451     | 102/23049 | 0.867357 | 0.885448 | 0.750084 | Hnrnpa2b1   |
| GO_MF_mzGO:001529 solute carrier 1/451            | 102/23049 | 0.867357 | 0.885448 | 0.750084 | Slc45a4     |
| GO_MF_mzGO:001640 acetyltransferase 1/451         | 109/23049 | 0.884566 | 0.900928 | 0.763197 | Acat2       |
| GO_MF_mzGO:001978 ubiquitin-like protein 1/451    | 109/23049 | 0.884566 | 0.900928 | 0.763197 | Usp17le     |
| GO_MF_mzGO:000517 integrin binding 1/451          | 112/23049 | 0.891242 | 0.906679 | 0.768069 | Itg1bp2     |
| GO_MF_mzGO:003059 neurotransmitter 1/451          | 114/23049 | 0.895477 | 0.909937 | 0.770829 | Ptk2b       |
| GO_MF_mzGO:003024 carbohydrate 3/451              | 268/23049 | 0.898118 | 0.911569 | 0.772211 | Cdipt/Man   |
| GO_MF_mzGO:000486 endopeptidase 2/451             | 200/23049 | 0.905079 | 0.917577 | 0.777301 | Ambp/Ser    |
| GO_MF_mzGO:003041 peptidase inhibitor 2/451       | 210/23049 | 0.919095 | 0.92982  | 0.787673 | Ambp/Ser    |
| GO_MF_mzGO:003067 protein binding 1/451           | 127/23049 | 0.919266 | 0.92982  | 0.787673 | Arrdc1      |
| GO_MF_mzGO:000852 G-protein coupled 1/451         | 129/23049 | 0.922412 | 0.931932 | 0.789462 | Cxcr1       |
| GO_MF_mzGO:000165 peptide receptor 1/451          | 133/23049 | 0.928341 | 0.936848 | 0.793626 | Cxcr1       |
| GO_MF_mzGO:003107 heat shock 1/451                | 135/23049 | 0.931134 | 0.938592 | 0.795103 | Tomm34      |
| GO_MF_mzGO:001510 inorganic anion 1/451           | 142/23049 | 0.940081 | 0.946527 | 0.801826 | Gpr89       |
| GO_MF_mzGO:000554 odorant binding 5/451           | 463/23049 | 0.950257 | 0.955681 | 0.80958  | Olfir1062/C |
| GO_MF_mzGO:005268 carboxylic acid 1/451           | 159/23049 | 0.957273 | 0.961639 | 0.814627 | 2810006K2   |
| GO_MF_mzGO:014009 catalytic activity 1/451        | 183/23049 | 0.973504 | 0.97683  | 0.827496 | Recql       |
| GO_MF_mzGO:001674 transferase 1/451               | 221/23049 | 0.987579 | 0.989826 | 0.838505 | Acat2       |
| GO_MF_mzGO:000122 transcriptase 1/451             | 235/23049 | 0.990607 | 0.991733 | 0.84012  | Vax1        |
| GO_MF_mzGO:001674 transferase 1/451               | 252/23049 | 0.993311 | 0.993311 | 0.841457 | Acat2       |
| GO_MF_mzGO:000518 neurohypophysial 2/520          | 2/23049   | 0.000508 | 0.272587 | 0.248033 | Avp/Oxt     |
| GO_MF_mzGO:000517 hormone 10/520                  | 130/23049 | 0.000745 | 0.272587 | 0.248033 | Adm2/Avp    |
| GO_MF_mzGO:007088 E-box binding 5/520             | 36/23049  | 0.001213 | 0.272587 | 0.248033 | Hes1/Myoc   |
| GO_MF_mzGO:001560 organophosphate 4/520           | 22/23049  | 0.001356 | 0.272587 | 0.248033 | Slc25a17/S  |
| GO_MF_mzGO:005143 corticotropin 2/520             | 4/23049   | 0.002958 | 0.27483  | 0.250074 | Ucn/Ucn2    |

|                                       |           |          |         |          |              |
|---------------------------------------|-----------|----------|---------|----------|--------------|
| GO_MF_mfGO:000806 glutamate 4/520     | 27/23049  | 0.002977 | 0.27483 | 0.250074 | Grik2/Grik4  |
| GO_MF_mfGO:000523 excitatory e5/520   | 48/23049  | 0.004416 | 0.27483 | 0.250074 | Chrna4/Ch    |
| GO_MF_mfGO:004216 acetylcholin 3/520  | 17/23049  | 0.006133 | 0.27483 | 0.250074 | Chrna4/Ch    |
| GO_MF_mfGO:000098 proximal p120/520   | 477/23049 | 0.00626  | 0.27483 | 0.250074 | Cux2/Dmtf    |
| GO_MF_mfGO:002282 transmitter 5/520   | 53/23049  | 0.006753 | 0.27483 | 0.250074 | Chrna4/Ch    |
| GO_MF_mfGO:002283 transmitter 5/520   | 53/23049  | 0.006753 | 0.27483 | 0.250074 | Chrna4/Ch    |
| GO_MF_mfGO:000473 pyruvate d12/520    | 6/23049   | 0.007175 | 0.27483 | 0.250074 | Dlat/Dld     |
| GO_MF_mfGO:001527 kainate selc2/520   | 6/23049   | 0.007175 | 0.27483 | 0.250074 | Grik2/Grik4  |
| GO_MF_mfGO:003458 piRNA binc2/520     | 6/23049   | 0.007175 | 0.27483 | 0.250074 | Mov1011/P    |
| GO_MF_mfGO:003460 pyruvate d12/520    | 6/23049   | 0.007175 | 0.27483 | 0.250074 | Dlat/Dld     |
| GO_MF_mfGO:003461 pyruvate d12/520    | 6/23049   | 0.007175 | 0.27483 | 0.250074 | Dlat/Dld     |
| GO_MF_mfGO:005142 corticotrop 2/520   | 6/23049   | 0.007175 | 0.27483 | 0.250074 | Ucn/Ucn2     |
| GO_MF_mfGO:000523 extracellula 3/520  | 18/23049  | 0.007238 | 0.27483 | 0.250074 | Grik2/Grik4  |
| GO_MF_mfGO:004801 receptor lig 20/520 | 486/23049 | 0.007622 | 0.27483 | 0.250074 | Adm2/Areç    |
| GO_MF_mfGO:009908 ligand-gate 7/520   | 101/23049 | 0.007953 | 0.27483 | 0.250074 | Catsper4/C   |
| GO_MF_mfGO:000497 ionotropic 3/520    | 19/23049  | 0.008453 | 0.27483 | 0.250074 | Grik2/Grik4  |
| GO_MF_mfGO:000511 patched bil2/520    | 7/23049   | 0.009896 | 0.27483 | 0.250074 | Ihh/Ptch1    |
| GO_MF_mfGO:000829 single-strai 2/520  | 7/23049   | 0.009896 | 0.27483 | 0.250074 | Isg20/Mgr    |
| GO_MF_mfGO:000097 RNA polym 19/520    | 466/23049 | 0.010037 | 0.27483 | 0.250074 | Cux2/Dmtf    |
| GO_MF_mfGO:190431 transmitter 4/520   | 38/23049  | 0.010306 | 0.27483 | 0.250074 | Chrna4/Ch    |
| GO_MF_mfGO:000107 transcriptic 9/520  | 160/23049 | 0.010632 | 0.27483 | 0.250074 | Cux2/Gcfc2   |
| GO_MF_mfGO:009952 neurotrans 4/520    | 39/23049  | 0.011284 | 0.27483 | 0.250074 | Chrna4/Ch    |
| GO_MF_mfGO:009896 postsynapt 4/520    | 41/23049  | 0.013413 | 0.27483 | 0.250074 | Chrna4/Ch    |
| GO_MF_mfGO:001662 oxidoreduc 3/520    | 23/23049  | 0.014456 | 0.27483 | 0.250074 | Dhcr24/Src   |
| GO_MF_mfGO:000401 adenylylate 12/520  | 9/23049   | 0.016465 | 0.27483 | 0.250074 | Ak6/Ak7      |
| GO_MF_mfGO:003027 clathrin bin 5/520  | 67/23049  | 0.017612 | 0.27483 | 0.250074 | Bcl2l1/Lrrk1 |
| GO_MF_mfGO:000122 transcriptic 11/520 | 235/23049 | 0.018218 | 0.27483 | 0.250074 | Cux2/Gcfc2   |
| GO_MF_mfGO:001686 intramolec 3/520    | 26/23049  | 0.020194 | 0.27483 | 0.250074 | Pmm1/Pus     |
| GO_MF_mfGO:003245 histone del 3/520   | 26/23049  | 0.020194 | 0.27483 | 0.250074 | Kdm4b/Kd     |
| GO_MF_mfGO:000523 extracellula 5/520  | 71/23049  | 0.022085 | 0.27483 | 0.250074 | Chrna4/Ch    |
| GO_MF_mfGO:000485 enzyme int 16/520   | 405/23049 | 0.022366 | 0.27483 | 0.250074 | 9230104L0    |
| GO_MF_mfGO:000024 delta24(24-1)/520   | 1/23049   | 0.022561 | 0.27483 | 0.250074 | Dhcr24       |
| GO_MF_mfGO:000109 TFIIIF-class 1/520  | 1/23049   | 0.022561 | 0.27483 | 0.250074 | Ctdp1        |
| GO_MF_mfGO:000179 polymeric i 1/520   | 1/23049   | 0.022561 | 0.27483 | 0.250074 | Pigr         |
| GO_MF_mfGO:000414 dihydrolipc 1/520   | 1/23049   | 0.022561 | 0.27483 | 0.250074 | Dld          |
| GO_MF_mfGO:000474 dihydrolipc 1/520   | 1/23049   | 0.022561 | 0.27483 | 0.250074 | Dlat         |
| GO_MF_mfGO:000479 threonine e 1/520   | 1/23049   | 0.022561 | 0.27483 | 0.250074 | Thnsl2       |
| GO_MF_mfGO:000851 reduced fo 1/520    | 1/23049   | 0.022561 | 0.27483 | 0.250074 | Slc19a1      |
| GO_MF_mfGO:000885 exoribonuc 1/520    | 1/23049   | 0.022561 | 0.27483 | 0.250074 | Isg20        |
| GO_MF_mfGO:001516 glycerol-3-1/520    | 1/23049   | 0.022561 | 0.27483 | 0.250074 | Slc37a2      |
| GO_MF_mfGO:001640 15-hydroxy 1/520    | 1/23049   | 0.022561 | 0.27483 | 0.250074 | Hpgd         |
| GO_MF_mfGO:001643 tRNA (ader) 1/520   | 1/23049   | 0.022561 | 0.27483 | 0.250074 | Trmo         |
| GO_MF_mfGO:001649 substance 1/520     | 1/23049   | 0.022561 | 0.27483 | 0.250074 | Tacr1        |
| GO_MF_mfGO:001979 tubulin N-1/520     | 1/23049   | 0.022561 | 0.27483 | 0.250074 | Atat1        |
| GO_MF_mfGO:001996 interleukin 1/520   | 1/23049   | 0.022561 | 0.27483 | 0.250074 | Il10ra       |
| GO_MF_mfGO:003052 dihydrolipc 1/520   | 1/23049   | 0.022561 | 0.27483 | 0.250074 | Dlat         |
| GO_MF_mfGO:003172 CXCR4 che 1/520     | 1/23049   | 0.022561 | 0.27483 | 0.250074 | Tff2         |
| GO_MF_mfGO:003185 oxytocin re 1/520   | 1/23049   | 0.022561 | 0.27483 | 0.250074 | Oxt          |

|                               |        |           |          |          |          |            |
|-------------------------------|--------|-----------|----------|----------|----------|------------|
| GO_MF_mfGO:003189V1B vasopri  | 1/520  | 1/23049   | 0.022561 | 0.27483  | 0.250074 | Avp        |
| GO_MF_mfGO:003529inositol per | 1/520  | 1/23049   | 0.022561 | 0.27483  | 0.250074 | Ippk       |
| GO_MF_mfGO:003647peroxidase   | 1/520  | 1/23049   | 0.022561 | 0.27483  | 0.250074 | Lrrk2      |
| GO_MF_mfGO:004354lipoamide l  | 1/520  | 1/23049   | 0.022561 | 0.27483  | 0.250074 | Dld        |
| GO_MF_mfGO:004461FMN transr   | 1/520  | 1/23049   | 0.022561 | 0.27483  | 0.250074 | Slc25a17   |
| GO_MF_mfGO:004502UDP-activa   | 1/520  | 1/23049   | 0.022561 | 0.27483  | 0.250074 | P2ry6      |
| GO_MF_mfGO:004681chemokine    | 1/520  | 1/23049   | 0.022561 | 0.27483  | 0.250074 | Ccl5       |
| GO_MF_mfGO:004722acetylgalac  | 1/520  | 1/23049   | 0.022561 | 0.27483  | 0.250074 | B3gnt6     |
| GO_MF_mfGO:005029fucokinase   | 1/520  | 1/23049   | 0.022561 | 0.27483  | 0.250074 | Fuk        |
| GO_MF_mfGO:005061delta14-ste  | 1/520  | 1/23049   | 0.022561 | 0.27483  | 0.250074 | Tm7sf2     |
| GO_MF_mfGO:005061delta24-ste  | 1/520  | 1/23049   | 0.022561 | 0.27483  | 0.250074 | Dhcr24     |
| GO_MF_mfGO:005172NAD transr   | 1/520  | 1/23049   | 0.022561 | 0.27483  | 0.250074 | Slc25a17   |
| GO_MF_mfGO:007182N-box binc   | 1/520  | 1/23049   | 0.022561 | 0.27483  | 0.250074 | Hes1       |
| GO_MF_mfGO:007041I-SMAD bil   | 2/520  | 11/23049  | 0.024417 | 0.293    | 0.266607 | Axin2/Tgfb |
| GO_MF_mfGO:001624channel re   | 7/520  | 127/23049 | 0.025248 | 0.298516 | 0.271626 | Kcnmb4/Pa  |
| GO_MF_mfGO:000098transcripti  | 17/520 | 446/23049 | 0.025656 | 0.298945 | 0.272017 | Cux2/Dmtf  |
| GO_MF_mfGO:000029adenine nu   | 2/520  | 12/23049  | 0.028868 | 0.317948 | 0.289309 | Slc25a17/S |
| GO_MF_mfGO:000534purine ribo  | 2/520  | 12/23049  | 0.028868 | 0.317948 | 0.289309 | Slc25a17/S |
| GO_MF_mfGO:001521purine nuc   | 2/520  | 12/23049  | 0.028868 | 0.317948 | 0.289309 | Slc25a17/S |
| GO_MF_mfGO:003245histone der  | 2/520  | 12/23049  | 0.028868 | 0.317948 | 0.289309 | Kdm4b/Kd   |
| GO_MF_mfGO:004302cysteine-ty  | 3/520  | 30/23049  | 0.029522 | 0.319527 | 0.290746 | Avp/Bcl2l1 |
| GO_MF_mfGO:000512cytokine ac  | 10/520 | 222/23049 | 0.029807 | 0.319527 | 0.290746 | Areg/Bmp2  |
| GO_MF_mfGO:004342bHLH trans   | 3/520  | 31/23049  | 0.032152 | 0.332121 | 0.302205 | Tcf21/Tsc2 |
| GO_MF_mfGO:001527ligand-gat   | 7/520  | 134/23049 | 0.032513 | 0.332121 | 0.302205 | Catsper4/C |
| GO_MF_mfGO:002283ligand-gat   | 7/520  | 134/23049 | 0.032513 | 0.332121 | 0.302205 | Catsper4/C |
| GO_MF_mfGO:000537water trans  | 2/520  | 13/23049  | 0.033616 | 0.332121 | 0.302205 | Aqp5/Slc14 |
| GO_MF_mfGO:000998pseudouric   | 2/520  | 13/23049  | 0.033616 | 0.332121 | 0.302205 | Pus7l/Rpus |
| GO_MF_mfGO:000370transcripti  | 6/520  | 107/23049 | 0.034369 | 0.332121 | 0.302205 | Foxc2/Foxf |
| GO_MF_mfGO:001978ubiquitin-li | 6/520  | 109/23049 | 0.037119 | 0.332121 | 0.302205 | Ankzf1/Gr  |
| GO_MF_mfGO:000438glutathione  | 3/520  | 33/23049  | 0.037767 | 0.332121 | 0.302205 | Gdap1l1/G  |
| GO_MF_mfGO:000832signaling p  | 2/520  | 14/23049  | 0.038643 | 0.332121 | 0.302205 | Trim12c/Tr |
| GO_MF_mfGO:003818pattern rec  | 2/520  | 14/23049  | 0.038643 | 0.332121 | 0.302205 | Trim12c/Tr |
| GO_MF_mfGO:009910ion channe   | 5/520  | 84/23049  | 0.041443 | 0.332121 | 0.302205 | Kcnmb4/Pa  |
| GO_MF_mfGO:000515epidermal    | 3/520  | 35/23049  | 0.043847 | 0.332121 | 0.302205 | Areg/Atxn2 |
| GO_MF_mfGO:000853Ran GTPas    | 3/520  | 35/23049  | 0.043847 | 0.332121 | 0.302205 | Nxt1/Ranb  |
| GO_MF_mfGO:000469protein kin  | 2/520  | 15/23049  | 0.043935 | 0.332121 | 0.302205 | Prkch/Prkc |
| GO_MF_mfGO:001521nucleotide   | 2/520  | 15/23049  | 0.043935 | 0.332121 | 0.302205 | Slc25a17/S |
| GO_MF_mfGO:001668oxidoreduc   | 2/520  | 15/23049  | 0.043935 | 0.332121 | 0.302205 | Dld/Nxn12  |
| GO_MF_mfGO:001672oxidoreduc   | 2/520  | 15/23049  | 0.043935 | 0.332121 | 0.302205 | Cyp2c38/R  |
| GO_MF_mfGO:000163leukotriene  | 1/520  | 2/23049   | 0.044613 | 0.332121 | 0.302205 | Ltb4r2     |
| GO_MF_mfGO:000404aminomet     | 1/520  | 2/23049   | 0.044613 | 0.332121 | 0.302205 | Gcsh       |
| GO_MF_mfGO:000461phosphom     | 1/520  | 2/23049   | 0.044613 | 0.332121 | 0.302205 | Pmm1       |
| GO_MF_mfGO:000464phosphose    | 1/520  | 2/23049   | 0.044613 | 0.332121 | 0.302205 | Dusp26     |
| GO_MF_mfGO:000496gonadotro    | 1/520  | 2/23049   | 0.044613 | 0.332121 | 0.302205 | Gpr173     |
| GO_MF_mfGO:000838cholesterol  | 1/520  | 2/23049   | 0.044613 | 0.332121 | 0.302205 | Fdx1       |
| GO_MF_mfGO:001503NADPH-ac     | 1/520  | 2/23049   | 0.044613 | 0.332121 | 0.302205 | Fdx1       |
| GO_MF_mfGO:001523FAD transn   | 1/520  | 2/23049   | 0.044613 | 0.332121 | 0.302205 | Slc25a17   |
| GO_MF_mfGO:001535methotrex    | 1/520  | 2/23049   | 0.044613 | 0.332121 | 0.302205 | Slc19a1    |

|                                     |          |          |          |          |             |
|-------------------------------------|----------|----------|----------|----------|-------------|
| GO_MF_mfGO:001641S-acetyltra 1/520  | 2/23049  | 0.044613 | 0.332121 | 0.302205 | Dlat        |
| GO_MF_mfGO:003172CCR4 chen 1/520    | 2/23049  | 0.044613 | 0.332121 | 0.302205 | Ccl5        |
| GO_MF_mfGO:003189V1A vasopri 1/520  | 2/23049  | 0.044613 | 0.332121 | 0.302205 | Avp         |
| GO_MF_mfGO:003421GTP-deper 1/520    | 2/23049  | 0.044613 | 0.332121 | 0.302205 | Lrrk2       |
| GO_MF_mfGO:004681histone dea 1/520  | 2/23049  | 0.044613 | 0.332121 | 0.302205 | Ucn         |
| GO_MF_mfGO:0046963'-phospho 1/520   | 2/23049  | 0.044613 | 0.332121 | 0.302205 | Slc35b3     |
| GO_MF_mfGO:190471beta-caten 1/520   | 2/23049  | 0.044613 | 0.332121 | 0.302205 | Lrrk2       |
| GO_MF_mfGO:002284acetylcholin 2/520 | 16/23049 | 0.049478 | 0.338854 | 0.308331 | Chrna4/Ch   |
| GO_MF_mfGO:19015Ccarbohydr 3/520    | 38/23049 | 0.053818 | 0.338854 | 0.308331 | Slc25a17/S  |
| GO_MF_mfGO:000109RNA polym 2/520    | 17/23049 | 0.055257 | 0.338854 | 0.308331 | Ctdp1/Gtf2  |
| GO_MF_mfGO:000495icosanoid r 2/520  | 17/23049 | 0.055257 | 0.338854 | 0.308331 | Hpgd/Ltb4   |
| GO_MF_mfGO:005108chaperone 5/520    | 92/23049 | 0.057227 | 0.338854 | 0.308331 | Bag5/Fnip2  |
| GO_MF_mfGO:004288amide tran 3/520   | 39/23049 | 0.057362 | 0.338854 | 0.308331 | Slc14a1/Slc |
| GO_MF_mfGO:003245demethyla 3/520    | 40/23049 | 0.061014 | 0.338854 | 0.308331 | Kdm4b/Kd    |
| GO_MF_mfGO:000452exodeoxyri 2/520   | 18/23049 | 0.06126  | 0.338854 | 0.308331 | Isg20/Mgr   |
| GO_MF_mfGO:001689exodeoxyri 2/520   | 18/23049 | 0.06126  | 0.338854 | 0.308331 | Isg20/Mgr   |
| GO_MF_mfGO:003645thiol-deper 5/520  | 95/23049 | 0.063921 | 0.338854 | 0.308331 | Ankzf1/Otu  |
| GO_MF_mfGO:01010Cubiquitinyl 5/520  | 95/23049 | 0.063921 | 0.338854 | 0.308331 | Ankzf1/Otu  |
| GO_MF_mfGO:004302cysteine-ty 3/520  | 41/23049 | 0.064772 | 0.338854 | 0.308331 | Avp/Bcl2l1. |
| GO_MF_mfGO:000109TFIIH-class 1/520  | 3/23049  | 0.066169 | 0.338854 | 0.308331 | Gtf2e1      |
| GO_MF_mfGO:0003863-oxo-5-a 1/520    | 3/23049  | 0.066169 | 0.338854 | 0.308331 | Srd5a1      |
| GO_MF_mfGO:000469calcium-in 1/520   | 3/23049  | 0.066169 | 0.338854 | 0.308331 | Prkch       |
| GO_MF_mfGO:000474ribonucleo 1/520   | 3/23049  | 0.066169 | 0.338854 | 0.308331 | Rrm2        |
| GO_MF_mfGO:000483valine-tRN 1/520   | 3/23049  | 0.066169 | 0.338854 | 0.308331 | Vars        |
| GO_MF_mfGO:000499tachykinin 1/520   | 3/23049  | 0.066169 | 0.338854 | 0.308331 | Tacr1       |
| GO_MF_mfGO:000511smoothene 1/520    | 3/23049  | 0.066169 | 0.338854 | 0.308331 | Ptch1       |
| GO_MF_mfGO:000527acetylcholin 1/520 | 3/23049  | 0.066169 | 0.338854 | 0.308331 | Slc18a3     |
| GO_MF_mfGO:000815hedgehog 1/520     | 3/23049  | 0.066169 | 0.338854 | 0.308331 | Ptch1       |
| GO_MF_mfGO:001506uridine nuc 1/520  | 3/23049  | 0.066169 | 0.338854 | 0.308331 | P2ry6       |
| GO_MF_mfGO:001511hexose phc 1/520   | 3/23049  | 0.066169 | 0.338854 | 0.308331 | Slc37a2     |
| GO_MF_mfGO:001522coenzyme 1/520     | 3/23049  | 0.066169 | 0.338854 | 0.308331 | Slc25a17    |
| GO_MF_mfGO:001524aminophos 1/520    | 3/23049  | 0.066169 | 0.338854 | 0.308331 | Tmem30b     |
| GO_MF_mfGO:001526urea chann 1/520   | 3/23049  | 0.066169 | 0.338854 | 0.308331 | Slc14a1     |
| GO_MF_mfGO:001531organophc 1/520    | 3/23049  | 0.066169 | 0.338854 | 0.308331 | Slc37a2     |
| GO_MF_mfGO:001552hexose-ph 1/520    | 3/23049  | 0.066169 | 0.338854 | 0.308331 | Slc37a2     |
| GO_MF_mfGO:001642tRNA (ader 1/520   | 3/23049  | 0.066169 | 0.338854 | 0.308331 | Trmo        |
| GO_MF_mfGO:001652growth hor 1/520   | 3/23049  | 0.066169 | 0.338854 | 0.308331 | Ghrhr       |
| GO_MF_mfGO:001672oxidoreduc 1/520   | 3/23049  | 0.066169 | 0.338854 | 0.308331 | Rrm2        |
| GO_MF_mfGO:001683carbon-ox 1/520    | 3/23049  | 0.066169 | 0.338854 | 0.308331 | Thnsl2      |
| GO_MF_mfGO:001915protein-dis 1/520  | 3/23049  | 0.066169 | 0.338854 | 0.308331 | Pdia3       |
| GO_MF_mfGO:003017troponin C 1/520   | 3/23049  | 0.066169 | 0.338854 | 0.308331 | Tnnt3       |
| GO_MF_mfGO:003029receptor sig 1/520 | 3/23049  | 0.066169 | 0.338854 | 0.308331 | Ccl5        |
| GO_MF_mfGO:003034syntaxin-3 1/520   | 3/23049  | 0.066169 | 0.338854 | 0.308331 | Syt4        |
| GO_MF_mfGO:003172CCR1 chen 1/520    | 3/23049  | 0.066169 | 0.338854 | 0.308331 | Ccl5        |
| GO_MF_mfGO:003189vasopressir 1/520  | 3/23049  | 0.066169 | 0.338854 | 0.308331 | Avp         |
| GO_MF_mfGO:003537chondroitir 1/520  | 3/23049  | 0.066169 | 0.338854 | 0.308331 | Ptprf       |
| GO_MF_mfGO:0043423-phosphoc 1/520   | 3/23049  | 0.066169 | 0.338854 | 0.308331 | Sgk1        |
| GO_MF_mfGO:004472hemi-metf 1/520    | 3/23049  | 0.066169 | 0.338854 | 0.308331 | Uhrf1       |

|                                               |       |           |          |          |          |             |
|-----------------------------------------------|-------|-----------|----------|----------|----------|-------------|
| GO_MF_mfGO:004775cholesterol                  | 1/520 | 3/23049   | 0.066169 | 0.338854 | 0.308331 | Srd5a1      |
| GO_MF_mfGO:006151glucose 6-phosphate          | 1/520 | 3/23049   | 0.066169 | 0.338854 | 0.308331 | Slc37a2     |
| GO_MF_mfGO:006173ribonucleoside               | 1/520 | 3/23049   | 0.066169 | 0.338854 | 0.308331 | Rrm2        |
| GO_MF_mfGO:007090serine binding               | 1/520 | 3/23049   | 0.066169 | 0.338854 | 0.308331 | Thns12      |
| GO_MF_mfGO:007107adenosine                    | 1/520 | 3/23049   | 0.066169 | 0.338854 | 0.308331 | Slc25a17    |
| GO_MF_mfGO:007155G-protein coupled            | 1/520 | 3/23049   | 0.066169 | 0.338854 | 0.308331 | P2ry6       |
| GO_MF_mfGO:008012AMP transport                | 1/520 | 3/23049   | 0.066169 | 0.338854 | 0.308331 | Slc25a17    |
| GO_MF_mfGO:190137acetate esterase             | 1/520 | 3/23049   | 0.066169 | 0.338854 | 0.308331 | Slc18a3     |
| GO_MF_mfGO:000472protein tyrosine             | 5/520 | 97/23049  | 0.068618 | 0.347056 | 0.315795 | Dusp26/Pa   |
| GO_MF_mfGO:000813protein tyrosine             | 3/520 | 42/23049  | 0.068634 | 0.347056 | 0.315795 | Ccdc155/D   |
| GO_MF_mfGO:001545potassium                    | 3/520 | 43/23049  | 0.072598 | 0.364805 | 0.331945 | Kcnmb4/Pr   |
| GO_MF_mfGO:004830calcium-dependent            | 4/520 | 71/23049  | 0.076549 | 0.38047  | 0.346199 | Grm4/S10C   |
| GO_MF_mfGO:001679exonuclease                  | 3/520 | 44/23049  | 0.076662 | 0.38047  | 0.346199 | Dis3/Isg20, |
| GO_MF_mfGO:001529solute:protein               | 2/520 | 21/23049  | 0.080478 | 0.383283 | 0.348758 | Slc15a3/Slc |
| GO_MF_mfGO:001546acetylcholine                | 2/520 | 21/23049  | 0.080478 | 0.383283 | 0.348758 | Chrna4/Ch   |
| GO_MF_mfGO:001920nucleotide                   | 2/520 | 21/23049  | 0.080478 | 0.383283 | 0.348758 | Ak6/Ak7     |
| GO_MF_mfGO:005142peptide hormone              | 2/520 | 21/23049  | 0.080478 | 0.383283 | 0.348758 | Ucn/Ucn2    |
| GO_MF_mfGO:000486cysteine-tyrosine            | 4/520 | 73/23049  | 0.082876 | 0.383283 | 0.348758 | 9230104L0   |
| GO_MF_mfGO:000164group III mGABA <sub>A</sub> | 1/520 | 4/23049   | 0.08724  | 0.383283 | 0.348758 | Grm4        |
| GO_MF_mfGO:000204opsin binding                | 1/520 | 4/23049   | 0.08724  | 0.383283 | 0.348758 | Sag         |
| GO_MF_mfGO:000383gamma-glutamyl               | 1/520 | 4/23049   | 0.08724  | 0.383283 | 0.348758 | Ggct        |
| GO_MF_mfGO:000391DNA topoisomerase            | 1/520 | 4/23049   | 0.08724  | 0.383283 | 0.348758 | Top3b       |
| GO_MF_mfGO:000412cytidylate kinase            | 1/520 | 4/23049   | 0.08724  | 0.383283 | 0.348758 | Ak7         |
| GO_MF_mfGO:000500transmembrane                | 1/520 | 4/23049   | 0.08724  | 0.383283 | 0.348758 | Ptprf       |
| GO_MF_mfGO:000502transforming                 | 1/520 | 4/23049   | 0.08724  | 0.383283 | 0.348758 | Tgfbfr1     |
| GO_MF_mfGO:000831single-strand                | 1/520 | 4/23049   | 0.08724  | 0.383283 | 0.348758 | Isg20       |
| GO_MF_mfGO:001501[heparan sulfate]            | 1/520 | 4/23049   | 0.08724  | 0.383283 | 0.348758 | Ndst2       |
| GO_MF_mfGO:001919transmembrane                | 1/520 | 4/23049   | 0.08724  | 0.383283 | 0.348758 | Ptprf       |
| GO_MF_mfGO:003101troponin T                   | 1/520 | 4/23049   | 0.08724  | 0.383283 | 0.348758 | Tnni2       |
| GO_MF_mfGO:003149nucleosome                   | 1/520 | 4/23049   | 0.08724  | 0.383283 | 0.348758 | Uhrf1       |
| GO_MF_mfGO:003376steroid dehydrogenase        | 1/520 | 4/23049   | 0.08724  | 0.383283 | 0.348758 | Srd5a1      |
| GO_MF_mfGO:005143corticotropin                | 1/520 | 4/23049   | 0.08724  | 0.383283 | 0.348758 | Ucn         |
| GO_MF_mfGO:009710hedgehog                     | 1/520 | 4/23049   | 0.08724  | 0.383283 | 0.348758 | Ptch1       |
| GO_MF_mfGO:1990935.8S rRNA                    | 1/520 | 4/23049   | 0.08724  | 0.383283 | 0.348758 | Rpl6l       |
| GO_MF_mfGO:000109basal transcription          | 3/520 | 47/23049  | 0.089432 | 0.388665 | 0.353656 | Ctdp1/Ctr9  |
| GO_MF_mfGO:000109basal RNA                    | 3/520 | 47/23049  | 0.089432 | 0.388665 | 0.353656 | Ctdp1/Ctr9  |
| GO_MF_mfGO:000472phosphoprotein               | 7/520 | 171/23049 | 0.093255 | 0.4031   | 0.366791 | Ccdc155/C   |
| GO_MF_mfGO:001510organic cation               | 2/520 | 23/23049  | 0.09418  | 0.403256 | 0.366932 | Slc18a3/Slc |
| GO_MF_mfGO:001995cytokine binding             | 5/520 | 107/23049 | 0.094859 | 0.403256 | 0.366932 | Crlf1/Cxcr6 |
| GO_MF_mfGO:004256hormone binding              | 5/520 | 107/23049 | 0.094859 | 0.403256 | 0.366932 | Chrna4/Ch   |
| GO_MF_mfGO:000521structural cation            | 2/520 | 24/23049  | 0.101265 | 0.403256 | 0.366932 | Cryaa/Cryc  |
| GO_MF_mfGO:001707syntrophin-1                 | 2/520 | 24/23049  | 0.101265 | 0.403256 | 0.366932 | Lrrk2/Syt4  |
| GO_MF_mfGO:001920phosphatase                  | 4/520 | 79/23049  | 0.103321 | 0.403256 | 0.366932 | Bmp2/Mtrr   |
| GO_MF_mfGO:004633SMAD binding                 | 4/520 | 79/23049  | 0.103321 | 0.403256 | 0.366932 | Axin2/Bmp   |
| GO_MF_mfGO:000484thiol-dependent              | 4/520 | 80/23049  | 0.106934 | 0.403256 | 0.366932 | Ankzf1/Otu  |
| GO_MF_mfGO:000516transforming                 | 3/520 | 51/23049  | 0.107724 | 0.403256 | 0.366932 | Bmp2/Gdf6   |
| GO_MF_mfGO:000015phosphorylation              | 1/520 | 5/23049   | 0.107836 | 0.403256 | 0.366932 | Kcnh3       |
| GO_MF_mfGO:000163cysteinyl leucine            | 1/520 | 5/23049   | 0.107836 | 0.403256 | 0.366932 | Ltb4r2      |

|                                |       |           |          |          |          |            |
|--------------------------------|-------|-----------|----------|----------|----------|------------|
| GO_MF_mfGO:000434glucokinas    | 1/520 | 5/23049   | 0.107836 | 0.403256 | 0.366932 | Hk1        |
| GO_MF_mfGO:000439hexokinase    | 1/520 | 5/23049   | 0.107836 | 0.403256 | 0.366932 | Hk1        |
| GO_MF_mfGO:000468phosphoryl    | 1/520 | 5/23049   | 0.107836 | 0.403256 | 0.366932 | Phkg2      |
| GO_MF_mfGO:000492interleukin   | 1/520 | 5/23049   | 0.107836 | 0.403256 | 0.366932 | Il10ra     |
| GO_MF_mfGO:000497leukotriene   | 1/520 | 5/23049   | 0.107836 | 0.403256 | 0.366932 | Ltb4r2     |
| GO_MF_mfGO:000851folic acid tr | 1/520 | 5/23049   | 0.107836 | 0.403256 | 0.366932 | Slc19a1    |
| GO_MF_mfGO:000886fructokinas   | 1/520 | 5/23049   | 0.107836 | 0.403256 | 0.366932 | Hk1        |
| GO_MF_mfGO:001520urea transr   | 1/520 | 5/23049   | 0.107836 | 0.403256 | 0.366932 | Slc14a1    |
| GO_MF_mfGO:001533peptide:prc   | 1/520 | 5/23049   | 0.107836 | 0.403256 | 0.366932 | Slc15a3    |
| GO_MF_mfGO:001915mannokina     | 1/520 | 5/23049   | 0.107836 | 0.403256 | 0.366932 | Hk1        |
| GO_MF_mfGO:002284glutamate-    | 1/520 | 5/23049   | 0.107836 | 0.403256 | 0.366932 | Grin2c     |
| GO_MF_mfGO:003089calcium-de    | 1/520 | 5/23049   | 0.107836 | 0.403256 | 0.366932 | Tnnt3      |
| GO_MF_mfGO:003101troponin I    | 1/520 | 5/23049   | 0.107836 | 0.403256 | 0.366932 | Tnnt3      |
| GO_MF_mfGO:003503histone de    | 1/520 | 5/23049   | 0.107836 | 0.403256 | 0.366932 | Ucn        |
| GO_MF_mfGO:003567enone red     | 1/520 | 5/23049   | 0.107836 | 0.403256 | 0.366932 | Srd5a1     |
| GO_MF_mfGO:004203ATPase inh    | 1/520 | 5/23049   | 0.107836 | 0.403256 | 0.366932 | Fnip2      |
| GO_MF_mfGO:005143BH3 domai     | 1/520 | 5/23049   | 0.107836 | 0.403256 | 0.366932 | Bcl2l1     |
| GO_MF_mfGO:007073protein-glu   | 1/520 | 5/23049   | 0.107836 | 0.403256 | 0.366932 | Ttll4      |
| GO_MF_mfGO:0000173'-5'-exori   | 2/520 | 25/23049  | 0.108491 | 0.403829 | 0.367453 | Dis3/lsg20 |
| GO_MF_mfGO:003059neurotrans    | 5/520 | 114/23049 | 0.115852 | 0.429238 | 0.390574 | Chrna4/Ch  |
| GO_MF_mfGO:000468calmodulin    | 2/520 | 27/23049  | 0.12333  | 0.432295 | 0.393356 | Mapkap3,   |
| GO_MF_mfGO:000518neuropepti    | 2/520 | 27/23049  | 0.12333  | 0.432295 | 0.393356 | Avp/Oxt    |
| GO_MF_mfGO:001689exoribonuc    | 2/520 | 27/23049  | 0.12333  | 0.432295 | 0.393356 | Dis3/lsg20 |
| GO_MF_mfGO:000166alpha-N-a     | 1/520 | 6/23049   | 0.127968 | 0.432295 | 0.393356 | St6galnac5 |
| GO_MF_mfGO:000446lysine N-ac   | 1/520 | 6/23049   | 0.127968 | 0.432295 | 0.393356 | Atat1      |
| GO_MF_mfGO:000467protein hist  | 1/520 | 6/23049   | 0.127968 | 0.432295 | 0.393356 | Kcnh3      |
| GO_MF_mfGO:000495prostaglan    | 1/520 | 6/23049   | 0.127968 | 0.432295 | 0.393356 | Hpgd       |
| GO_MF_mfGO:000512ciliary neur  | 1/520 | 6/23049   | 0.127968 | 0.432295 | 0.393356 | Crif1      |
| GO_MF_mfGO:000549vitamin D t   | 1/520 | 6/23049   | 0.127968 | 0.432295 | 0.393356 | S100g      |
| GO_MF_mfGO:000866cAMP-dep      | 1/520 | 6/23049   | 0.127968 | 0.432295 | 0.393356 | Prkar1b    |
| GO_MF_mfGO:001921phosphata     | 1/520 | 6/23049   | 0.127968 | 0.432295 | 0.393356 | Bmp2       |
| GO_MF_mfGO:001995C-X-C che     | 1/520 | 6/23049   | 0.127968 | 0.432295 | 0.393356 | Cxcr6      |
| GO_MF_mfGO:003036interleukin   | 1/520 | 6/23049   | 0.127968 | 0.432295 | 0.393356 | Il17rd     |
| GO_MF_mfGO:003062U2 snRNA      | 1/520 | 6/23049   | 0.127968 | 0.432295 | 0.393356 | lsg20      |
| GO_MF_mfGO:003369oxidoreduc    | 1/520 | 6/23049   | 0.127968 | 0.432295 | 0.393356 | Cyp2c38    |
| GO_MF_mfGO:003451U3 snoRN      | 1/520 | 6/23049   | 0.127968 | 0.432295 | 0.393356 | lsg20      |
| GO_MF_mfGO:003487caffeine ox   | 1/520 | 6/23049   | 0.127968 | 0.432295 | 0.393356 | Cyp2c38    |
| GO_MF_mfGO:004342MRF bindir    | 1/520 | 6/23049   | 0.127968 | 0.432295 | 0.393356 | Tsc22d3    |
| GO_MF_mfGO:007029N-acylpho     | 1/520 | 6/23049   | 0.127968 | 0.432295 | 0.393356 | Pld4       |
| GO_MF_mfGO:199005phosphatic    | 1/520 | 6/23049   | 0.127968 | 0.432295 | 0.393356 | Preli3a    |
| GO_MF_mfGO:199025keratin filar | 1/520 | 6/23049   | 0.127968 | 0.432295 | 0.393356 | Fam83h     |
| GO_MF_mfGO:003016PDZ domai     | 5/520 | 118/23049 | 0.128757 | 0.43314  | 0.394125 | Dtna/Grik2 |
| GO_MF_mfGO:000453exoribonuc    | 2/520 | 28/23049  | 0.130923 | 0.436771 | 0.397429 | Dis3/lsg20 |
| GO_MF_mfGO:009960ligand-gat    | 2/520 | 28/23049  | 0.130923 | 0.436771 | 0.397429 | Catsper4/C |
| GO_MF_mfGO:001666oxidoreduc    | 3/520 | 56/23049  | 0.132414 | 0.439922 | 0.400295 | Dld/Nxn12/ |
| GO_MF_mfGO:001662oxidoreduc    | 3/520 | 57/23049  | 0.137571 | 0.448293 | 0.407913 | Dhcr24/Src |
| GO_MF_mfGO:000110RNA polym     | 2/520 | 29/23049  | 0.13862  | 0.448293 | 0.407913 | Bend6/Tfa  |
| GO_MF_mfGO:000522calcium act   | 2/520 | 29/23049  | 0.13862  | 0.448293 | 0.407913 | Catsper4/K |



|                                     |           |          |          |          |             |
|-------------------------------------|-----------|----------|----------|----------|-------------|
| GO_MF_mfGO:00506&androgen r2/520    | 29/23049  | 0.13862  | 0.448293 | 0.407913 | Kdm5d/Tcf   |
| GO_MF_mfGO:007234modified a4/520    | 89/23049  | 0.141878 | 0.448293 | 0.407913 | Gsta2/Slc1! |
| GO_MF_mfGO:00718&neuropepti2/520    | 30/23049  | 0.146413 | 0.448293 | 0.407913 | Ucn/Ucn2    |
| GO_MF_mfGO:000107transcripti7/520   | 193/23049 | 0.147583 | 0.448293 | 0.407913 | Bend6/Dm    |
| GO_MF_mfGO:000164adenylate c1/520   | 7/23049   | 0.147647 | 0.448293 | 0.407913 | Grm4        |
| GO_MF_mfGO:000497NMDA glui1/520     | 7/23049   | 0.147647 | 0.448293 | 0.407913 | Grin2c      |
| GO_MF_mfGO:000511type II tran1/520  | 7/23049   | 0.147647 | 0.448293 | 0.407913 | Tgfb1       |
| GO_MF_mfGO:00081&ferric iron k1/520 | 7/23049   | 0.147647 | 0.448293 | 0.407913 | Rrm2        |
| GO_MF_mfGO:000992fatty acid e1/520  | 7/23049   | 0.147647 | 0.448293 | 0.407913 | Elovl2      |
| GO_MF_mfGO:001034carboxyl-C1/520    | 7/23049   | 0.147647 | 0.448293 | 0.407913 | Armt1       |
| GO_MF_mfGO:001684amidine-ly1/520    | 7/23049   | 0.147647 | 0.448293 | 0.407913 | Ggct        |
| GO_MF_mfGO:00317&CCR5 chen1/520     | 7/23049   | 0.147647 | 0.448293 | 0.407913 | Ccl5        |
| GO_MF_mfGO:00327&heterotrimc1/520   | 7/23049   | 0.147647 | 0.448293 | 0.407913 | Cetn4       |
| GO_MF_mfGO:00511&coenzyme 1/520     | 7/23049   | 0.147647 | 0.448293 | 0.407913 | Slc25a17    |
| GO_MF_mfGO:00519&protein car1/520   | 7/23049   | 0.147647 | 0.448293 | 0.407913 | Armt1       |
| GO_MF_mfGO:007234NAADP-se1/520      | 7/23049   | 0.147647 | 0.448293 | 0.407913 | Catsper4    |
| GO_MF_mfGO:01023&3-oxo-ara1/520     | 7/23049   | 0.147647 | 0.448293 | 0.407913 | Elovl2      |
| GO_MF_mfGO:01023&3-oxo-cerc1/520    | 7/23049   | 0.147647 | 0.448293 | 0.407913 | Elovl2      |
| GO_MF_mfGO:01023&3-oxo-lign1/520    | 7/23049   | 0.147647 | 0.448293 | 0.407913 | Elovl2      |
| GO_MF_mfGO:00228&substrate-ε13/520  | 415/23049 | 0.147758 | 0.448293 | 0.407913 | Aqp5/Catsp  |
| GO_MF_mfGO:00421&neurotrans3/520    | 60/23049  | 0.153437 | 0.458125 | 0.416859 | Chrna4/Ch   |
| GO_MF_mfGO:00009&RNA polymr2/520    | 31/23049  | 0.154293 | 0.458125 | 0.416859 | Ctr9/Gtf2e: |
| GO_MF_mfGO:00051&type I inter2/520  | 31/23049  | 0.154293 | 0.458125 | 0.416859 | Gm13287/l   |
| GO_MF_mfGO:00082Cion channe2/520    | 31/23049  | 0.154293 | 0.458125 | 0.416859 | Pacsin3/Stc |
| GO_MF_mfGO:00305Cspectrin bir2/520  | 31/23049  | 0.154293 | 0.458125 | 0.416859 | Ptpn/Sag    |
| GO_MF_mfGO:00314&chromatin 4/520    | 92/23049  | 0.154418 | 0.458125 | 0.416859 | Ankle1/Fox  |
| GO_MF_mfGO:00052&cation char10/520  | 307/23049 | 0.158332 | 0.466295 | 0.424293 | Catsper4/C  |
| GO_MF_mfGO:00228&ion gated c10/520  | 307/23049 | 0.158332 | 0.466295 | 0.424293 | Catsper4/C  |
| GO_MF_mfGO:00052&potassium 5/520    | 127/23049 | 0.160015 | 0.467503 | 0.425392 | Grik2/Grik4 |
| GO_MF_mfGO:001507potassium 6/520    | 163/23049 | 0.163859 | 0.467503 | 0.425392 | Grik2/Grik4 |
| GO_MF_mfGO:00045&deoxyribor3/520    | 62/23049  | 0.164318 | 0.467503 | 0.425392 | Dnase1l3/l: |
| GO_MF_mfGO:00228&gated chan10/520   | 310/23049 | 0.165149 | 0.467503 | 0.425392 | Catsper4/C  |
| GO_MF_mfGO:000391DNA topoi:1/520    | 8/23049   | 0.166882 | 0.467503 | 0.425392 | Top3b       |
| GO_MF_mfGO:00047&sphingomy1/520     | 8/23049   | 0.166882 | 0.467503 | 0.425392 | Enpp7       |
| GO_MF_mfGO:00048&cAMP-dep1/520      | 8/23049   | 0.166882 | 0.467503 | 0.425392 | Prkar1b     |
| GO_MF_mfGO:000502transformir1/520   | 8/23049   | 0.166882 | 0.467503 | 0.425392 | Tgfb1       |
| GO_MF_mfGO:000842CTD phosp1/520     | 8/23049   | 0.166882 | 0.467503 | 0.425392 | Ctdp1       |
| GO_MF_mfGO:00164&C-X-C che1/520     | 8/23049   | 0.166882 | 0.467503 | 0.425392 | Cxcr6       |
| GO_MF_mfGO:00198&calcium chi1/520   | 8/23049   | 0.166882 | 0.467503 | 0.425392 | Pacsin3     |
| GO_MF_mfGO:003061U1 snRNA 1/520     | 8/23049   | 0.166882 | 0.467503 | 0.425392 | lsg20       |
| GO_MF_mfGO:00324&histone del1/520   | 8/23049   | 0.166882 | 0.467503 | 0.425392 | Kdm5d       |
| GO_MF_mfGO:00380&sphingosin1/520    | 8/23049   | 0.166882 | 0.467503 | 0.425392 | S1pr1       |
| GO_MF_mfGO:00167&transferase3/520   | 63/23049  | 0.169843 | 0.470474 | 0.428096 | Gdap1l1/G   |
| GO_MF_mfGO:00048&protein phc2/520   | 33/23049  | 0.170284 | 0.470474 | 0.428096 | Ppp1r1a/St  |
| GO_MF_mfGO:001624channel inf2/520   | 33/23049  | 0.170284 | 0.470474 | 0.428096 | Pacsin3/Stc |
| GO_MF_mfGO:005101mitogen-a2/520     | 33/23049  | 0.170284 | 0.470474 | 0.428096 | Mapkapk3/   |
| GO_MF_mfGO:004257phosphoric11/520   | 351/23049 | 0.172236 | 0.473853 | 0.43117  | Ccdc155/C   |
| GO_MF_mfGO:000122transcripti13/520  | 428/23049 | 0.172685 | 0.473853 | 0.43117  | Dmtf1/Foxi  |

|                                     |           |          |          |          |             |
|-------------------------------------|-----------|----------|----------|----------|-------------|
| GO_MF_mfGO:000534ATP transr1/520    | 9/23049   | 0.185684 | 0.487877 | 0.443931 | Slc25a17    |
| GO_MF_mfGO:000535carbohydr1/520     | 9/23049   | 0.185684 | 0.487877 | 0.443931 | Slc2a10     |
| GO_MF_mfGO:0008293'-5'-exod1/520    | 9/23049   | 0.185684 | 0.487877 | 0.443931 | Isg20       |
| GO_MF_mfGO:000853N-acetyllac1/520   | 9/23049   | 0.185684 | 0.487877 | 0.443931 | B3gnt6      |
| GO_MF_mfGO:000993calcium-de1/520    | 9/23049   | 0.185684 | 0.487877 | 0.443931 | Mapkapk3    |
| GO_MF_mfGO:001537cation:chlo1/520   | 9/23049   | 0.185684 | 0.487877 | 0.443931 | Slc12a7     |
| GO_MF_mfGO:001537potassium:1/520    | 9/23049   | 0.185684 | 0.487877 | 0.443931 | Slc12a7     |
| GO_MF_mfGO:001600phospholip1/520    | 9/23049   | 0.185684 | 0.487877 | 0.443931 | Ccl5        |
| GO_MF_mfGO:001976immunoglc1/520     | 9/23049   | 0.185684 | 0.487877 | 0.443931 | Pigr        |
| GO_MF_mfGO:003095Tat protein1/520   | 9/23049   | 0.185684 | 0.487877 | 0.443931 | Ctdp1       |
| GO_MF_mfGO:003195very long-c1/520   | 9/23049   | 0.185684 | 0.487877 | 0.443931 | Slc27a4     |
| GO_MF_mfGO:009737MDM2/MC1/520       | 9/23049   | 0.185684 | 0.487877 | 0.443931 | Bcl2l1      |
| GO_MF_mfGO:009898G-protein r1/520   | 9/23049   | 0.185684 | 0.487877 | 0.443931 | Grm4        |
| GO_MF_mfGO:003303bitter taste 2/520 | 35/23049  | 0.186533 | 0.48851  | 0.444507 | Tas2r107/T  |
| GO_MF_mfGO:005142hormone r6/520     | 172/23049 | 0.19387  | 0.494177 | 0.449663 | Kdm5d/Me    |
| GO_MF_mfGO:001677phosphotr2/520     | 36/23049  | 0.194737 | 0.494177 | 0.449663 | Ak6/Ak7     |
| GO_MF_mfGO:001921phosphata:2/520    | 36/23049  | 0.194737 | 0.494177 | 0.449663 | Ppp1r1a/SI  |
| GO_MF_mfGO:004317RNA polymr2/520    | 36/23049  | 0.194737 | 0.494177 | 0.449663 | Ctr9/Gtf2e: |
| GO_MF_mfGO:001526channel ac13/520   | 439/23049 | 0.1953   | 0.494177 | 0.449663 | Aqp5/Catsp  |
| GO_MF_mfGO:002280passive tra13/520  | 439/23049 | 0.1953   | 0.494177 | 0.449663 | Aqp5/Catsp  |
| GO_MF_mfGO:003041peptidase i7/520   | 210/23049 | 0.197747 | 0.494177 | 0.449663 | 9230104L0   |
| GO_MF_mfGO:000372RNA helica3/520    | 68/23049  | 0.198211 | 0.494177 | 0.449663 | Ddx46/Dhx   |
| GO_MF_mfGO:000400ATP-deper3/520     | 68/23049  | 0.198211 | 0.494177 | 0.449663 | Ddx46/Dhx   |
| GO_MF_mfGO:000110RNA polymr4/520    | 102/23049 | 0.198925 | 0.494177 | 0.449663 | Bend6/Mec   |
| GO_MF_mfGO:000166G-protein r9/520   | 286/23049 | 0.199545 | 0.494177 | 0.449663 | Avp/Ccl5/C  |
| GO_MF_mfGO:001708sodium ch2/520     | 37/23049  | 0.202986 | 0.494177 | 0.449663 | Prss8/Sc1t1 |
| GO_MF_mfGO:003162ubiquitin a2/520   | 37/23049  | 0.202986 | 0.494177 | 0.449663 | Grik2/Rnf1. |
| GO_MF_mfGO:004216SH2 domai2/520     | 37/23049  | 0.202986 | 0.494177 | 0.449663 | Ctr9/Khdrb  |
| GO_MF_mfGO:000111transcriptic3/520  | 69/23049  | 0.204017 | 0.494177 | 0.449663 | Sox10/Tfap  |
| GO_MF_mfGO:000818RNA-depe3/520      | 69/23049  | 0.204017 | 0.494177 | 0.449663 | Ddx46/Dhx   |
| GO_MF_mfGO:000113transcriptic1/520  | 10/23049  | 0.204063 | 0.494177 | 0.449663 | Dmtf1       |
| GO_MF_mfGO:000850monoamin1/520      | 10/23049  | 0.204063 | 0.494177 | 0.449663 | Slc18a3     |
| GO_MF_mfGO:001085calcium-de1/520    | 10/23049  | 0.204063 | 0.494177 | 0.449663 | Mapkapk3    |
| GO_MF_mfGO:001521ADP transn1/520    | 10/23049  | 0.204063 | 0.494177 | 0.449663 | Slc25a17    |
| GO_MF_mfGO:001671oxidoreduc1/520    | 10/23049  | 0.204063 | 0.494177 | 0.449663 | Fdx1        |
| GO_MF_mfGO:001686intramolec1/520    | 10/23049  | 0.204063 | 0.494177 | 0.449663 | Pmm1        |
| GO_MF_mfGO:007051death dom1/520     | 10/23049  | 0.204063 | 0.494177 | 0.449663 | Bcl2l1      |
| GO_MF_mfGO:010102estrogen 11/520    | 10/23049  | 0.204063 | 0.494177 | 0.449663 | Cyp2c38     |
| GO_MF_mfGO:010299myristoyl-(1/520   | 10/23049  | 0.204063 | 0.494177 | 0.449663 | Them4       |
| GO_MF_mfGO:000452exonucleas3/520    | 70/23049  | 0.209862 | 0.505695 | 0.460144 | Dis3/Isg20, |
| GO_MF_mfGO:000471protein ser2/520   | 38/23049  | 0.211273 | 0.505695 | 0.460144 | Lrrk2/Sgk1  |
| GO_MF_mfGO:000178phosphoty2/520     | 39/23049  | 0.219593 | 0.505695 | 0.460144 | Hck/Ptpn5   |
| GO_MF_mfGO:001593nucleobase2/520    | 39/23049  | 0.219593 | 0.505695 | 0.460144 | Slc25a17/S  |
| GO_MF_mfGO:000107transcriptic9/520  | 294/23049 | 0.221419 | 0.505695 | 0.460144 | Dmtf1/Foxo  |
| GO_MF_mfGO:000431fatty acid s1/520  | 11/23049  | 0.222028 | 0.505695 | 0.460144 | Elovl2      |
| GO_MF_mfGO:000459peptide al1/520    | 11/23049  | 0.222028 | 0.505695 | 0.460144 | Naa25       |
| GO_MF_mfGO:000470MAP kinas1/520     | 11/23049  | 0.222028 | 0.505695 | 0.460144 | Lrrk2       |
| GO_MF_mfGO:000479thioredoxir1/520   | 11/23049  | 0.222028 | 0.505695 | 0.460144 | Nxn12       |

|                                      |           |          |          |          |             |
|--------------------------------------|-----------|----------|----------|----------|-------------|
| GO_MF_mfGO:000486protein ser 1/520   | 11/23049  | 0.222028 | 0.505695 | 0.460144 | Ppp1r1a     |
| GO_MF_mfGO:000495prostaglandin 1/520 | 11/23049  | 0.222028 | 0.505695 | 0.460144 | Hpgd        |
| GO_MF_mfGO:000496galanin rec 1/520   | 11/23049  | 0.222028 | 0.505695 | 0.460144 | Ltb4r2      |
| GO_MF_mfGO:000524voltage-ga 1/520    | 11/23049  | 0.222028 | 0.505695 | 0.460144 | Clcn1       |
| GO_MF_mfGO:000806chitin bindi 1/520  | 11/23049  | 0.222028 | 0.505695 | 0.460144 | Fibcd1      |
| GO_MF_mfGO:001529anion:catio 1/520   | 11/23049  | 0.222028 | 0.505695 | 0.460144 | Slc12a7     |
| GO_MF_mfGO:001677phosphotr 1/520     | 11/23049  | 0.222028 | 0.505695 | 0.460144 | Kcnh3       |
| GO_MF_mfGO:001910pyrimidine 1/520    | 11/23049  | 0.222028 | 0.505695 | 0.460144 | P2ry6       |
| GO_MF_mfGO:003612BMP bindir 1/520    | 11/23049  | 0.222028 | 0.505695 | 0.460144 | Gdf5        |
| GO_MF_mfGO:004230phosphate 1/520     | 11/23049  | 0.222028 | 0.505695 | 0.460144 | Ptprf       |
| GO_MF_mfGO:005186histone der 1/520   | 11/23049  | 0.222028 | 0.505695 | 0.460144 | Kdm4b       |
| GO_MF_mfGO:006022lipase activ 1/520  | 11/23049  | 0.222028 | 0.505695 | 0.460144 | Ccl5        |
| GO_MF_mfGO:000823cysteine-ty 6/520   | 182/23049 | 0.229415 | 0.517818 | 0.471175 | Ankzf1/Grr  |
| GO_MF_mfGO:004438ubiquitin-li 10/520 | 337/23049 | 0.232382 | 0.517818 | 0.471175 | Axin2/Bag5  |
| GO_MF_mfGO:000852taste recep 2/520   | 41/23049  | 0.236307 | 0.517818 | 0.471175 | Tas2r107/T  |
| GO_MF_mfGO:001685isomerase 5/520     | 147/23049 | 0.238545 | 0.517818 | 0.471175 | Pdia3/Pmn   |
| GO_MF_mfGO:000160G-protein 1/520     | 12/23049  | 0.239588 | 0.517818 | 0.471175 | P2ry6       |
| GO_MF_mfGO:000216aminoacyl- 1/520    | 12/23049  | 0.239588 | 0.517818 | 0.471175 | Vars        |
| GO_MF_mfGO:000495prostanoid 1/520    | 12/23049  | 0.239588 | 0.517818 | 0.471175 | Hpgd        |
| GO_MF_mfGO:000552profilin bin 1/520  | 12/23049  | 0.239588 | 0.517818 | 0.471175 | Fmn1        |
| GO_MF_mfGO:000553glucose bir 1/520   | 12/23049  | 0.239588 | 0.517818 | 0.471175 | Hk1         |
| GO_MF_mfGO:001503peptide dis 1/520   | 12/23049  | 0.239588 | 0.517818 | 0.471175 | Pdia3       |
| GO_MF_mfGO:001511phosphate 1/520     | 12/23049  | 0.239588 | 0.517818 | 0.471175 | Slc37a2     |
| GO_MF_mfGO:001525water chan 1/520    | 12/23049  | 0.239588 | 0.517818 | 0.471175 | Aqp5        |
| GO_MF_mfGO:001692SUMO-spe 1/520      | 12/23049  | 0.239588 | 0.517818 | 0.471175 | Gm5415      |
| GO_MF_mfGO:003168G-protein 1/520     | 12/23049  | 0.239588 | 0.517818 | 0.471175 | Gng2        |
| GO_MF_mfGO:003970co-recept 1/520     | 12/23049  | 0.239588 | 0.517818 | 0.471175 | Bmp2        |
| GO_MF_mfGO:004302ribosomal 1/520     | 12/23049  | 0.239588 | 0.517818 | 0.471175 | Dhx29       |
| GO_MF_mfGO:004502G-protein 1/520     | 12/23049  | 0.239588 | 0.517818 | 0.471175 | P2ry6       |
| GO_MF_mfGO:007234modified a 1/520    | 12/23049  | 0.239588 | 0.517818 | 0.471175 | Slc19a1     |
| GO_MF_mfGO:009749structural n 1/520  | 12/23049  | 0.239588 | 0.517818 | 0.471175 | Mybph       |
| GO_MF_mfGO:001503disulfide 2/520     | 42/23049  | 0.24469  | 0.527429 | 0.47992  | Nxn12/Pdia  |
| GO_MF_mfGO:001679phosphata 8/520     | 265/23049 | 0.250623 | 0.538772 | 0.490242 | Ccdc155/C   |
| GO_MF_mfGO:000527sodium ch 2/520     | 43/23049  | 0.253085 | 0.538978 | 0.490429 | Grik2/Grik4 |
| GO_MF_mfGO:001920nucleobase 2/520    | 43/23049  | 0.253085 | 0.538978 | 0.490429 | Ak6/Ak7     |
| GO_MF_mfGO:004439ubiquitin-li 2/520  | 43/23049  | 0.253085 | 0.538978 | 0.490429 | Grik2/Rnf1  |
| GO_MF_mfGO:000446long-chain 1/520    | 13/23049  | 0.256752 | 0.538978 | 0.490429 | Slc27a4     |
| GO_MF_mfGO:000552tropomyos 1/520     | 13/23049  | 0.256752 | 0.538978 | 0.490429 | Tnnt3       |
| GO_MF_mfGO:000554folic acid b 1/520  | 13/23049  | 0.256752 | 0.538978 | 0.490429 | Slc19a1     |
| GO_MF_mfGO:001527store-oper 1/520    | 13/23049  | 0.256752 | 0.538978 | 0.490429 | Trpc1       |
| GO_MF_mfGO:001684carbon-nit 1/520    | 13/23049  | 0.256752 | 0.538978 | 0.490429 | Ggct        |
| GO_MF_mfGO:001920nucleoside 1/520    | 13/23049  | 0.256752 | 0.538978 | 0.490429 | Ak7         |
| GO_MF_mfGO:000856protein tra 3/520   | 78/23049  | 0.257753 | 0.53967  | 0.491059 | Dscr3/Nxt1  |
| GO_MF_mfGO:000504scavenger 2/520     | 44/23049  | 0.261486 | 0.543242 | 0.494309 | Crb3/Susd   |
| GO_MF_mfGO:0008403'-5' exont 2/520   | 44/23049  | 0.261486 | 0.543242 | 0.494309 | Dis3/Isg20  |
| GO_MF_mfGO:001662oxidoreduc 2/520    | 44/23049  | 0.261486 | 0.543242 | 0.494309 | Dlat/Dld    |
| GO_MF_mfGO:007040ammonium 3/520      | 79/23049  | 0.263849 | 0.546738 | 0.49749  | Chrna4/Ch   |
| GO_MF_mfGO:000408carbonate 1/520     | 14/23049  | 0.273529 | 0.549794 | 0.500271 | Car6        |

|                                     |           |          |          |          |             |
|-------------------------------------|-----------|----------|----------|----------|-------------|
| GO_MF_mfGO:000843JUN kinase 1/520   | 14/23049  | 0.273529 | 0.549794 | 0.500271 | Hes1        |
| GO_MF_mfGO:003448heparan su1/520    | 14/23049  | 0.273529 | 0.549794 | 0.500271 | Ndst2       |
| GO_MF_mfGO:004204neurexin fa1/520   | 14/23049  | 0.273529 | 0.549794 | 0.500271 | Nlgn1       |
| GO_MF_mfGO:004512bioactive liq1/520 | 14/23049  | 0.273529 | 0.549794 | 0.500271 | S1pr1       |
| GO_MF_mfGO:004523CXCR chen1/520     | 14/23049  | 0.273529 | 0.549794 | 0.500271 | Tff2        |
| GO_MF_mfGO:004529gamma-ca1/520      | 14/23049  | 0.273529 | 0.549794 | 0.500271 | Dsg1a       |
| GO_MF_mfGO:004801receptor ar1/520   | 14/23049  | 0.273529 | 0.549794 | 0.500271 | Ccl5        |
| GO_MF_mfGO:004815tau protein1/520   | 14/23049  | 0.273529 | 0.549794 | 0.500271 | Sgk1        |
| GO_MF_mfGO:00514CBH domain1/520     | 14/23049  | 0.273529 | 0.549794 | 0.500271 | Bcl2l1      |
| GO_MF_mfGO:00704CNAD+ binc1/520     | 14/23049  | 0.273529 | 0.549794 | 0.500271 | Hpgd        |
| GO_MF_mfGO:00707CBMP recep1/520     | 14/23049  | 0.273529 | 0.549794 | 0.500271 | Bmp2        |
| GO_MF_mfGO:199084promoter-1/2/520   | 46/23049  | 0.278289 | 0.557967 | 0.507707 | Foxc2/Sox1  |
| GO_MF_mfGO:000818neuropepti2/520    | 47/23049  | 0.286683 | 0.568544 | 0.517332 | Ltb4r2/Tac  |
| GO_MF_mfGO:003149nucleosom2/520     | 47/23049  | 0.286683 | 0.568544 | 0.517332 | Dnntp1/Uh   |
| GO_MF_mfGO:000808phosphoric3/520    | 83/23049  | 0.288389 | 0.568544 | 0.517332 | Ccl5/Enpp1  |
| GO_MF_mfGO:001629palmitoyl-(1/520   | 15/23049  | 0.289929 | 0.568544 | 0.517332 | Them4       |
| GO_MF_mfGO:001921intermedia1/520    | 15/23049  | 0.289929 | 0.568544 | 0.517332 | Fam83h      |
| GO_MF_mfGO:003015receptor sig1/520  | 15/23049  | 0.289929 | 0.568544 | 0.517332 | Lrrk2       |
| GO_MF_mfGO:003423protein kin1/520   | 15/23049  | 0.289929 | 0.568544 | 0.517332 | Prkar1b     |
| GO_MF_mfGO:004283peptidogly1/520    | 15/23049  | 0.289929 | 0.568544 | 0.517332 | Hk1         |
| GO_MF_mfGO:00704CNADPH bir1/520     | 15/23049  | 0.289929 | 0.568544 | 0.517332 | Srd5a1      |
| GO_MF_mfGO:00011C RNA polym2/520    | 48/23049  | 0.295066 | 0.575808 | 0.523942 | Tfap2b/Ww   |
| GO_MF_mfGO:000178phosphatic2/520    | 48/23049  | 0.295066 | 0.575808 | 0.523942 | Syt4/Syt6   |
| GO_MF_mfGO:000486endopeptic6/520    | 200/23049 | 0.297791 | 0.576525 | 0.524594 | 9230104L0   |
| GO_MF_mfGO:000462phospholip3/520    | 85/23049  | 0.300727 | 0.576525 | 0.524594 | Ccl5/Enpp1  |
| GO_MF_mfGO:003162ubiquitin p9/520   | 322/23049 | 0.304118 | 0.576525 | 0.524594 | Axin2/Bag5  |
| GO_MF_mfGO:000521ion channe11/520   | 404/23049 | 0.305467 | 0.576525 | 0.524594 | Catsper4/C  |
| GO_MF_mfGO:000518pheromon1/520      | 16/23049  | 0.305959 | 0.576525 | 0.524594 | Esp38       |
| GO_MF_mfGO:00083C voltage-ga1/520   | 16/23049  | 0.305959 | 0.576525 | 0.524594 | Cln1        |
| GO_MF_mfGO:00165C protein-ho1/520   | 16/23049  | 0.305959 | 0.576525 | 0.524594 | Gpr173      |
| GO_MF_mfGO:001667oxidoreduc1/520    | 16/23049  | 0.305959 | 0.576525 | 0.524594 | Pdia3       |
| GO_MF_mfGO:001716Ral GTPase1/520    | 16/23049  | 0.305959 | 0.576525 | 0.524594 | Prkch       |
| GO_MF_mfGO:003029protein tyr1/520   | 16/23049  | 0.305959 | 0.576525 | 0.524594 | Ccl5        |
| GO_MF_mfGO:004228MHC class 1/520    | 16/23049  | 0.305959 | 0.576525 | 0.524594 | Pdia3       |
| GO_MF_mfGO:005137muscle alpl1/520   | 16/23049  | 0.305959 | 0.576525 | 0.524594 | Mybph       |
| GO_MF_mfGO:007067inositol 1,4 1/520 | 16/23049  | 0.305959 | 0.576525 | 0.524594 | Trpc1       |
| GO_MF_mfGO:006113peptidase r7/520   | 242/23049 | 0.30619  | 0.576525 | 0.524594 | 9230104L0   |
| GO_MF_mfGO:001629lipase activ4/520  | 124/23049 | 0.306846 | 0.576525 | 0.524594 | Ccl5/Ces1k  |
| GO_MF_mfGO:000486protein kin.3/520  | 86/23049  | 0.306906 | 0.576525 | 0.524594 | Lrrtm1/Prk  |
| GO_MF_mfGO:00453C protein ph1/2/520 | 50/23049  | 0.311785 | 0.582965 | 0.530454 | Hck/Ptpn5   |
| GO_MF_mfGO:005101protein kin.2/520  | 50/23049  | 0.311785 | 0.582965 | 0.530454 | Lrrk2/Prkar |
| GO_MF_mfGO:000512cytokine re9/520   | 325/23049 | 0.313414 | 0.584651 | 0.531988 | Bmp2/Ccl5   |
| GO_MF_mfGO:000554calcium-de2/520    | 51/23049  | 0.320114 | 0.58731  | 0.534408 | Syt4/Syt6   |
| GO_MF_mfGO:003017pyridoxal p2/520   | 51/23049  | 0.320114 | 0.58731  | 0.534408 | Accs/Thnsl  |
| GO_MF_mfGO:000443phosphatic1/520    | 17/23049  | 0.321628 | 0.58731  | 0.534408 | Ccl5        |
| GO_MF_mfGO:000455nucleoside 1/520   | 17/23049  | 0.321628 | 0.58731  | 0.534408 | Ak7         |
| GO_MF_mfGO:000467transmemk1/520     | 17/23049  | 0.321628 | 0.58731  | 0.534408 | Tgfb1       |
| GO_MF_mfGO:000832methyl-Cp 1/520    | 17/23049  | 0.321628 | 0.58731  | 0.534408 | Uhrf1       |

|                                     |           |          |          |          |             |
|-------------------------------------|-----------|----------|----------|----------|-------------|
| GO_MF_mfGO:001688acid-aminc1/520    | 17/23049  | 0.321628 | 0.58731  | 0.534408 | Ttl4        |
| GO_MF_mfGO:004329glutathione1/520   | 17/23049  | 0.321628 | 0.58731  | 0.534408 | Gsta2       |
| GO_MF_mfGO:190075oligopeptic1/520   | 17/23049  | 0.321628 | 0.58731  | 0.534408 | Gsta2       |
| GO_MF_mfGO:003067protein bin4/520   | 127/23049 | 0.322144 | 0.58731  | 0.534408 | Khdrbs2/Tr  |
| GO_MF_mfGO:006113endopeptic6/520    | 207/23049 | 0.325415 | 0.590687 | 0.53748  | 9230104L0   |
| GO_MF_mfGO:001921kinase inhib3/520  | 89/23049  | 0.325466 | 0.590687 | 0.53748  | Lrrtm1/Prk  |
| GO_MF_mfGO:007027vitamin B6 2/520   | 52/23049  | 0.328418 | 0.594703 | 0.541135 | Accs/Thnsl  |
| GO_MF_mfGO:000119transcriptic2/520  | 53/23049  | 0.336695 | 0.599343 | 0.545356 | Bend6/Tfa   |
| GO_MF_mfGO:000462phospholip1/520    | 18/23049  | 0.336944 | 0.599343 | 0.545356 | Ccl5        |
| GO_MF_mfGO:000474retinol deh1/520   | 18/23049  | 0.336944 | 0.599343 | 0.545356 | Bmp2        |
| GO_MF_mfGO:001526calcium-ac1/520    | 18/23049  | 0.336944 | 0.599343 | 0.545356 | Kcnmb4      |
| GO_MF_mfGO:003279GTPase act1/520    | 18/23049  | 0.336944 | 0.599343 | 0.545356 | Fmn1        |
| GO_MF_mfGO:005118cofactor tra1/520  | 18/23049  | 0.336944 | 0.599343 | 0.545356 | Slc25a17    |
| GO_MF_mfGO:005510ubiquitin-c1/520   | 18/23049  | 0.336944 | 0.599343 | 0.545356 | Trib2       |
| GO_MF_mfGO:007018DNA polyn1/520     | 18/23049  | 0.336944 | 0.599343 | 0.545356 | Fanci       |
| GO_MF_mfGO:005121dioxygenase3/520   | 91/23049  | 0.33784  | 0.59961  | 0.545599 | Kdm4b/Kd    |
| GO_MF_mfGO:007006RNA polym2/520     | 54/23049  | 0.34494  | 0.610126 | 0.555168 | Ctr9/Gtf2e  |
| GO_MF_mfGO:000489cytokine re3/520   | 93/23049  | 0.3502   | 0.610126 | 0.555168 | Cxcr6/Il10r |
| GO_MF_mfGO:000375protein dis1/520   | 19/23049  | 0.351914 | 0.610126 | 0.555168 | Pdia3       |
| GO_MF_mfGO:000514interleukin-1/520  | 19/23049  | 0.351914 | 0.610126 | 0.555168 | Il1f10      |
| GO_MF_mfGO:000540carbohydrate1/520  | 19/23049  | 0.351914 | 0.610126 | 0.555168 | Slc2a10     |
| GO_MF_mfGO:001564fatty acid li1/520 | 19/23049  | 0.351914 | 0.610126 | 0.555168 | Slc27a4     |
| GO_MF_mfGO:001686intramolec1/520    | 19/23049  | 0.351914 | 0.610126 | 0.555168 | Pdia3       |
| GO_MF_mfGO:001704GTP-Rho b1/520     | 19/23049  | 0.351914 | 0.610126 | 0.555168 | Exoc1       |
| GO_MF_mfGO:004327phospholip1/520    | 19/23049  | 0.351914 | 0.610126 | 0.555168 | Prkcz       |
| GO_MF_mfGO:005043transformir1/520   | 19/23049  | 0.351914 | 0.610126 | 0.555168 | Tgfbr1      |
| GO_MF_mfGO:000014SNARE bin4/520     | 133/23049 | 0.352871 | 0.610126 | 0.555168 | Lrrk2/Stx12 |
| GO_MF_mfGO:001984vitamin bin4/520   | 133/23049 | 0.352871 | 0.610126 | 0.555168 | Accs/S100c  |
| GO_MF_mfGO:000802ATP-deper3/520     | 94/23049  | 0.356372 | 0.613539 | 0.558274 | Ddx46/Dhx   |
| GO_MF_mfGO:007003purine NTF3/520    | 94/23049  | 0.356372 | 0.613539 | 0.558274 | Ddx46/Dhx   |
| GO_MF_mfGO:000554phospholip2/520    | 56/23049  | 0.361327 | 0.616788 | 0.56123  | Preli3a/Tr  |
| GO_MF_mfGO:001690oxidoreduc2/520    | 56/23049  | 0.361327 | 0.616788 | 0.56123  | Dlat/Dld    |
| GO_MF_mfGO:003506methylatec2/520    | 56/23049  | 0.361327 | 0.616788 | 0.56123  | Spin2d/Uhl  |
| GO_MF_mfGO:014003methylation2/520   | 56/23049  | 0.361327 | 0.616788 | 0.56123  | Spin2d/Uhl  |
| GO_MF_mfGO:000161purinergic1/520    | 20/23049  | 0.366548 | 0.619127 | 0.563358 | P2ry6       |
| GO_MF_mfGO:000524inward rect1/520   | 20/23049  | 0.366548 | 0.619127 | 0.563358 | Kcnj4       |
| GO_MF_mfGO:000815protein phc1/520   | 20/23049  | 0.366548 | 0.619127 | 0.563358 | Sh3rf2      |
| GO_MF_mfGO:000826poly(U) RN1/520    | 20/23049  | 0.366548 | 0.619127 | 0.563358 | Khdrbs2     |
| GO_MF_mfGO:001650nucleotide1/520    | 20/23049  | 0.366548 | 0.619127 | 0.563358 | P2ry6       |
| GO_MF_mfGO:001990syntaxin bin3/520  | 96/23049  | 0.36869  | 0.621439 | 0.565462 | Lrrk2/Syt4/ |
| GO_MF_mfGO:005101actin filame5/520  | 177/23049 | 0.369794 | 0.621996 | 0.565969 | Ablim3/Fln  |
| GO_MF_mfGO:000823serine-type6/520   | 219/23049 | 0.373451 | 0.626837 | 0.570374 | Cela2a/Klk  |
| GO_MF_mfGO:000187pattern bin1/520   | 21/23049  | 0.380851 | 0.632654 | 0.575667 | Susd2       |
| GO_MF_mfGO:000837sialyltransfe1/520 | 21/23049  | 0.380851 | 0.632654 | 0.575667 | St6galnac5  |
| GO_MF_mfGO:003024polysaccha1/520    | 21/23049  | 0.380851 | 0.632654 | 0.575667 | Susd2       |
| GO_MF_mfGO:004662sphingolipi1/520   | 21/23049  | 0.380851 | 0.632654 | 0.575667 | S1pr1       |
| GO_MF_mfGO:007069transmemk1/520     | 21/23049  | 0.380851 | 0.632654 | 0.575667 | Bmp2        |
| GO_MF_mfGO:000422metalloenc3/520    | 99/23049  | 0.387083 | 0.638723 | 0.581189 | Adam23/A    |

|                                     |           |          |          |          |             |
|-------------------------------------|-----------|----------|----------|----------|-------------|
| GO_MF_mfGO:005121phosphopr3/520     | 100/23049 | 0.393187 | 0.638723 | 0.581189 | Hck/Ptpn5,  |
| GO_MF_mfGO:001717serine hydr6/520   | 224/23049 | 0.393566 | 0.638723 | 0.581189 | Cela2a/Klk  |
| GO_MF_mfGO:003525glutamate 2/520    | 60/23049  | 0.393617 | 0.638723 | 0.581189 | Ptpn5/Sync  |
| GO_MF_mfGO:000098transcripti1/520   | 22/23049  | 0.394832 | 0.638723 | 0.581189 | Tfap2b      |
| GO_MF_mfGO:000477sterol ester1/520  | 22/23049  | 0.394832 | 0.638723 | 0.581189 | Ces1b       |
| GO_MF_mfGO:000814poly(A) bin1/520   | 22/23049  | 0.394832 | 0.638723 | 0.581189 | Khdrbs2     |
| GO_MF_mfGO:001502coreceptor1/520    | 22/23049  | 0.394832 | 0.638723 | 0.581189 | Cxcr6       |
| GO_MF_mfGO:001527calcium-re1/520    | 22/23049  | 0.394832 | 0.638723 | 0.581189 | Catsper4    |
| GO_MF_mfGO:00192Ccarbohydr1/520     | 22/23049  | 0.394832 | 0.638723 | 0.581189 | Hk1         |
| GO_MF_mfGO:00305Cankyrin bin1/520   | 22/23049  | 0.394832 | 0.638723 | 0.581189 | Flnc        |
| GO_MF_mfGO:009048vitamin tra1/520   | 22/23049  | 0.394832 | 0.638723 | 0.581189 | Slc19a1     |
| GO_MF_mfGO:01401C catalytic ac1/520 | 22/23049  | 0.394832 | 0.638723 | 0.581189 | B3gnt6      |
| GO_MF_mfGO:000472protein ser2/520   | 61/23049  | 0.401575 | 0.641764 | 0.583957 | Ctdp1/Palc  |
| GO_MF_mfGO:001683carbon-oxy2/520    | 61/23049  | 0.401575 | 0.641764 | 0.583957 | Car6/Thnsl  |
| GO_MF_mfGO:000417endopeptic11/520   | 438/23049 | 0.401794 | 0.641764 | 0.583957 | Adam23/A    |
| GO_MF_mfGO:001563tubulin bin8/520   | 311/23049 | 0.403736 | 0.641764 | 0.583957 | Ccdc187/A   |
| GO_MF_mfGO:002284voltage-ga4/520    | 143/23049 | 0.404011 | 0.641764 | 0.583957 | Catsper4/C  |
| GO_MF_mfGO:001523drug trans3/520    | 102/23049 | 0.405347 | 0.641764 | 0.583957 | Slc18a3/Slc |
| GO_MF_mfGO:001529solute:catic3/520  | 102/23049 | 0.405347 | 0.641764 | 0.583957 | Slc12a7/Slc |
| GO_MF_mfGO:000813nuclear loc1/520   | 23/23049  | 0.408498 | 0.641764 | 0.583957 | Tnpo2       |
| GO_MF_mfGO:000817O-methyltr1/520    | 23/23049  | 0.408498 | 0.641764 | 0.583957 | Armt1       |
| GO_MF_mfGO:00164C CoA-ligase1/520   | 23/23049  | 0.408498 | 0.641764 | 0.583957 | Slc27a4     |
| GO_MF_mfGO:003143mitogen-a1/520     | 23/23049  | 0.408498 | 0.641764 | 0.583957 | Dixdc1      |
| GO_MF_mfGO:003361receptor se1/520   | 23/23049  | 0.408498 | 0.641764 | 0.583957 | Bmp2        |
| GO_MF_mfGO:004761acyl-CoA h1/520    | 23/23049  | 0.408498 | 0.641764 | 0.583957 | Them4       |
| GO_MF_mfGO:007084dynein con1/520    | 23/23049  | 0.408498 | 0.641764 | 0.583957 | Ccdc155     |
| GO_MF_mfGO:000438helicase ac4/520   | 144/23049 | 0.409094 | 0.641764 | 0.583957 | Ddx46/Dhx   |
| GO_MF_mfGO:007049repressing 2/520   | 62/23049  | 0.409484 | 0.641764 | 0.583957 | Mkks/Tle4   |
| GO_MF_mfGO:00082C heparin bir4/520  | 145/23049 | 0.414168 | 0.643309 | 0.585362 | Ccl5/Fbln7, |
| GO_MF_mfGO:007085growth fac4/520    | 145/23049 | 0.414168 | 0.643309 | 0.585362 | Areg/Atxn2  |
| GO_MF_mfGO:000373structural c5/520  | 187/23049 | 0.41447  | 0.643309 | 0.585362 | Rpl6l/Mrpl  |
| GO_MF_mfGO:000524voltage-ga5/520    | 187/23049 | 0.41447  | 0.643309 | 0.585362 | Catsper4/C  |
| GO_MF_mfGO:002283voltage-ga5/520    | 187/23049 | 0.41447  | 0.643309 | 0.585362 | Catsper4/C  |
| GO_MF_mfGO:003532enhancer t3/520    | 104/23049 | 0.417434 | 0.643591 | 0.585619 | Rai1/Sox1C  |
| GO_MF_mfGO:003525nuclear ho14/520   | 146/23049 | 0.419232 | 0.643591 | 0.585619 | Kdm5d/Me    |
| GO_MF_mfGO:000163G-protein r1/520   | 24/23049  | 0.421856 | 0.643591 | 0.585619 | Cxcr6       |
| GO_MF_mfGO:000184complemer1/520     | 24/23049  | 0.421856 | 0.643591 | 0.585619 | Cd46        |
| GO_MF_mfGO:000495chemokine1/520     | 24/23049  | 0.421856 | 0.643591 | 0.585619 | Cxcr6       |
| GO_MF_mfGO:001995chemokine1/520     | 24/23049  | 0.421856 | 0.643591 | 0.585619 | Cxcr6       |
| GO_MF_mfGO:003054receptor in1/520   | 24/23049  | 0.421856 | 0.643591 | 0.585619 | Ccl5        |
| GO_MF_mfGO:003055cAMP bind1/520     | 24/23049  | 0.421856 | 0.643591 | 0.585619 | Prkar1b     |
| GO_MF_mfGO:003163G-protein l1/520   | 24/23049  | 0.421856 | 0.643591 | 0.585619 | Cetn4       |
| GO_MF_mfGO:005128NAD bindir2/520    | 64/23049  | 0.425145 | 0.64738  | 0.589066 | Dld/Hpgd    |
| GO_MF_mfGO:000425serine-type5/520   | 191/23049 | 0.432226 | 0.654813 | 0.59583  | Cela2a/Klk  |
| GO_MF_mfGO:000377actin bindir10/520 | 406/23049 | 0.434007 | 0.654813 | 0.59583  | Ablim3/Dix  |
| GO_MF_mfGO:000818poly-pyrim1/520    | 25/23049  | 0.434913 | 0.654813 | 0.59583  | Khdrbs2     |
| GO_MF_mfGO:001628CoA hydro1/520     | 25/23049  | 0.434913 | 0.654813 | 0.59583  | Them4       |
| GO_MF_mfGO:003558purinergic 1/520   | 25/23049  | 0.434913 | 0.654813 | 0.59583  | P2ry6       |

|                                    |           |          |          |          |             |
|------------------------------------|-----------|----------|----------|----------|-------------|
| GO_MF_mfGO:004696thyroid hor1/520  | 25/23049  | 0.434913 | 0.654813 | 0.59583  | Med30       |
| GO_MF_mfGO:004237chemokine 2/520   | 66/23049  | 0.440587 | 0.661152 | 0.601598 | Ccl5/Tff2   |
| GO_MF_mfGO:000108RNA polyr4/520    | 151/23049 | 0.444387 | 0.661152 | 0.601598 | Ctdp1/Dus   |
| GO_MF_mfGO:190168sulfur comj6/520  | 237/23049 | 0.445645 | 0.661152 | 0.601598 | Ccl5/Dld/Fi |
| GO_MF_mfGO:000549steroid bin3/520  | 109/23049 | 0.447278 | 0.661152 | 0.601598 | Paqr6/Ptch  |
| GO_MF_mfGO:001640acetyltrans3/520  | 109/23049 | 0.447278 | 0.661152 | 0.601598 | Atat1/Dlat/ |
| GO_MF_mfGO:000515insulin rece1/520 | 26/23049  | 0.447676 | 0.661152 | 0.601598 | Ptprf       |
| GO_MF_mfGO:000535glucose tra1/520  | 26/23049  | 0.447676 | 0.661152 | 0.601598 | Slc2a10     |
| GO_MF_mfGO:001530anion:anior1/520  | 26/23049  | 0.447676 | 0.661152 | 0.601598 | Slc37a2     |
| GO_MF_mfGO:001687acid-thiol l1/520 | 26/23049  | 0.447676 | 0.661152 | 0.601598 | Slc27a4     |
| GO_MF_mfGO:0051522 iron, 2 su1/520 | 26/23049  | 0.447676 | 0.661152 | 0.601598 | Fdx1        |
| GO_MF_mfGO:003421peptide N-2/520   | 67/23049  | 0.448222 | 0.661152 | 0.601598 | Atat1/Naa2  |
| GO_MF_mfGO:005066coenzyme 7/520    | 281/23049 | 0.448991 | 0.661152 | 0.601598 | Accs/Atat1  |
| GO_MF_mfGO:000555glycosamin5/520   | 196/23049 | 0.454256 | 0.667682 | 0.60754  | Ccl5/Fbln7, |
| GO_MF_mfGO:001988protein phr2/520  | 68/23049  | 0.455798 | 0.668725 | 0.608489 | Ppp1r1a/Si  |
| GO_MF_mfGO:001514hexose trar1/520  | 27/23049  | 0.460151 | 0.671436 | 0.610956 | Slc2a10     |
| GO_MF_mfGO:00718814-3-3 prc1/520   | 27/23049  | 0.460151 | 0.671436 | 0.610956 | Prkcz       |
| GO_MF_mfGO:190468peptide tra1/520  | 27/23049  | 0.460151 | 0.671436 | 0.610956 | Slc15a3     |
| GO_MF_mfGO:000830structural c1/520 | 28/23049  | 0.472344 | 0.685496 | 0.623749 | Mybph       |
| GO_MF_mfGO:003029protein ser1/520  | 28/23049  | 0.472344 | 0.685496 | 0.623749 | Prkar1b     |
| GO_MF_mfGO:190168sulfur comj1/520  | 28/23049  | 0.472344 | 0.685496 | 0.623749 | Slc35b3     |
| GO_MF_mfGO:000554odorant bir11/520 | 463/23049 | 0.473691 | 0.686212 | 0.624401 | Olfr1009/C  |
| GO_MF_mfGO:000451nuclease ar5/520  | 201/23049 | 0.476048 | 0.688386 | 0.626379 | Ankle1/Dis  |
| GO_MF_mfGO:000509GTPase act6/520   | 246/23049 | 0.481174 | 0.690332 | 0.62815  | Abr/Arhga1  |
| GO_MF_mfGO:000526calcium chr3/520  | 115/23049 | 0.48225  | 0.690332 | 0.62815  | Catsper4/C  |
| GO_MF_mfGO:000524calcium chr1/520  | 29/23049  | 0.484263 | 0.690332 | 0.62815  | Pacsin3     |
| GO_MF_mfGO:000817tRNA meth1/520    | 29/23049  | 0.484263 | 0.690332 | 0.62815  | Trmo        |
| GO_MF_mfGO:001514monosacch1/520    | 29/23049  | 0.484263 | 0.690332 | 0.62815  | Slc2a10     |
| GO_MF_mfGO:003051snoRNA bir1/520   | 29/23049  | 0.484263 | 0.690332 | 0.62815  | lsg20       |
| GO_MF_mfGO:004301gamma-tu1/520     | 29/23049  | 0.484263 | 0.690332 | 0.62815  | Dixdc1      |
| GO_MF_mfGO:007071poly-purin1/520   | 29/23049  | 0.484263 | 0.690332 | 0.62815  | Khdrbs2     |
| GO_MF_mfGO:000905electron trc2/520 | 72/23049  | 0.485489 | 0.690855 | 0.628625 | Dld/Fdx1    |
| GO_MF_mfGO:000839steroid hyc2/520  | 73/23049  | 0.492753 | 0.699498 | 0.63649  | Cyp2c38/Fi  |
| GO_MF_mfGO:001704Rho GTPas4/520    | 161/23049 | 0.493601 | 0.699498 | 0.63649  | Abr/Exoc1/  |
| GO_MF_mfGO:000857ATP-deper1/520    | 30/23049  | 0.495913 | 0.699498 | 0.63649  | BC048507    |
| GO_MF_mfGO:001923deaminase1/520    | 30/23049  | 0.495913 | 0.699498 | 0.63649  | Rpusd3      |
| GO_MF_mfGO:005111sugar trans1/520  | 30/23049  | 0.495913 | 0.699498 | 0.63649  | Slc2a10     |
| GO_MF_mfGO:003321amide binc8/520   | 341/23049 | 0.505327 | 0.710574 | 0.646568 | Dhcr24/Dlc  |
| GO_MF_mfGO:000550retinoid bir1/520 | 31/23049  | 0.5073   | 0.710574 | 0.646568 | Lcn5        |
| GO_MF_mfGO:000851ammonium1/520     | 31/23049  | 0.5073   | 0.710574 | 0.646568 | Slc18a3     |
| GO_MF_mfGO:001641S-acyltrans1/520  | 31/23049  | 0.5073   | 0.710574 | 0.646568 | Dlat        |
| GO_MF_mfGO:000507SH3/SH2 a1/520    | 32/23049  | 0.518431 | 0.722389 | 0.657319 | Khdrbs2     |
| GO_MF_mfGO:004550dynein inte1/520  | 32/23049  | 0.518431 | 0.722389 | 0.657319 | BC048507    |
| GO_MF_mfGO:006163ubiquitin c1/520  | 32/23049  | 0.518431 | 0.722389 | 0.657319 | Ube2c       |
| GO_MF_mfGO:006058nucleoside 7/520  | 301/23049 | 0.520833 | 0.723671 | 0.658486 | Abr/Arhga1  |
| GO_MF_mfGO:004317alcohol bin2/520  | 77/23049  | 0.521151 | 0.723671 | 0.658486 | Ptch1/Trpc  |
| GO_MF_mfGO:000110RNA polyr1/520    | 33/23049  | 0.529311 | 0.728708 | 0.663069 | Mkks        |
| GO_MF_mfGO:004228MHC prote1/520    | 33/23049  | 0.529311 | 0.728708 | 0.663069 | Pdia3       |

|                                                   |           |          |          |          |                 |
|---------------------------------------------------|-----------|----------|----------|----------|-----------------|
| GO_MF_mfGO:005139alpha-actin1/520                 | 33/23049  | 0.529311 | 0.728708 | 0.663069 | Mybph           |
| GO_MF_mfGO:005195dynein light1/520                | 33/23049  | 0.529311 | 0.728708 | 0.663069 | BC048507        |
| GO_MF_mfGO:006165ubiquitin-like1/520              | 33/23049  | 0.529311 | 0.728708 | 0.663069 | Ube2c           |
| GO_MF_mfGO:000521intracellular1/520               | 34/23049  | 0.539945 | 0.735789 | 0.669512 | Catsper4        |
| GO_MF_mfGO:000837galactosyltransferase1/520       | 34/23049  | 0.539945 | 0.735789 | 0.669512 | B3gnt6          |
| GO_MF_mfGO:001502glucuronosyltransferase1/520     | 34/23049  | 0.539945 | 0.735789 | 0.669512 | Ugt1a7c         |
| GO_MF_mfGO:003033cyclin binding1/520              | 34/23049  | 0.539945 | 0.735789 | 0.669512 | Ptch1           |
| GO_MF_mfGO:003503histone acetyltransferase1/520   | 34/23049  | 0.539945 | 0.735789 | 0.669512 | Zbtb7a          |
| GO_MF_mfGO:007033aromatase1/520                   | 34/23049  | 0.539945 | 0.735789 | 0.669512 | Cyp2c38         |
| GO_MF_mfGO:003802cargo receptor2/520              | 80/23049  | 0.541741 | 0.736987 | 0.670602 | Crb3/Susd3      |
| GO_MF_mfGO:003069GTPase regulator6/520            | 263/23049 | 0.546162 | 0.739921 | 0.673272 | Abr/Arhgap10    |
| GO_MF_mfGO:199078protein tyrosine kinase2/520     | 81/23049  | 0.548466 | 0.739921 | 0.673272 | Ptprf/Trim68    |
| GO_MF_mfGO:000823metalloproteinase4/520           | 173/23049 | 0.550085 | 0.739921 | 0.673272 | Adam23/Adam10   |
| GO_MF_mfGO:000113transcription factor1/520        | 35/23049  | 0.550339 | 0.739921 | 0.673272 | Dmtf1           |
| GO_MF_mfGO:000483triglyceride1/520                | 35/23049  | 0.550339 | 0.739921 | 0.673272 | Ces1b           |
| GO_MF_mfGO:000531dicarboxylate1/520               | 35/23049  | 0.550339 | 0.739921 | 0.673272 | Slc19a1         |
| GO_MF_mfGO:000833arachidonic acid1/520            | 35/23049  | 0.550339 | 0.739921 | 0.673272 | Cyp2c38         |
| GO_MF_mfGO:000852G-protein coupled receptor3/520  | 129/23049 | 0.559399 | 0.750847 | 0.683213 | Cxcr6/Ltb4      |
| GO_MF_mfGO:003294protein-coupled receptor2/520    | 83/23049  | 0.561708 | 0.751436 | 0.683749 | Ippk/Lrrk2      |
| GO_MF_mfGO:005066flavin adenine dinucleotide2/520 | 83/23049  | 0.561708 | 0.751436 | 0.683749 | Dhcr24/Dlc1     |
| GO_MF_mfGO:000851organic anion transporter5/520   | 222/23049 | 0.563854 | 0.752855 | 0.685041 | Slc19a1/Slc12a1 |
| GO_MF_mfGO:000451endonuclease3/520                | 130/23049 | 0.564641 | 0.752855 | 0.685041 | Ankle1/Dis3     |
| GO_MF_mfGO:003525steroid hormone2/520             | 84/23049  | 0.568224 | 0.754319 | 0.686373 | Kdm5d/Tcf12     |
| GO_MF_mfGO:000097RNA polymerase1/520              | 37/23049  | 0.57043  | 0.754319 | 0.686373 | Tfap2b          |
| GO_MF_mfGO:001687ligase activator1/520            | 37/23049  | 0.57043  | 0.754319 | 0.686373 | Slc27a4         |
| GO_MF_mfGO:001984isoprenoid1/520                  | 37/23049  | 0.57043  | 0.754319 | 0.686373 | Lcn5            |
| GO_MF_mfGO:003136translation1/520                 | 37/23049  | 0.57043  | 0.754319 | 0.686373 | Rps3a1          |
| GO_MF_mfGO:000850anion transporter7/520           | 316/23049 | 0.572367 | 0.754738 | 0.686754 | Clcn1/Slc12a1   |
| GO_MF_mfGO:006009molecular chaperone4/520         | 178/23049 | 0.572625 | 0.754738 | 0.686754 | Khdrbs2/Tric    |
| GO_MF_mfGO:000801beta-catenin2/520                | 85/23049  | 0.574669 | 0.755242 | 0.687213 | Axin2/Nf2       |
| GO_MF_mfGO:000165peptide receptor3/520            | 133/23049 | 0.580136 | 0.755242 | 0.687213 | Cxcr6/Ltb4      |
| GO_MF_mfGO:000548SNAP receptor1/520               | 38/23049  | 0.580137 | 0.755242 | 0.687213 | Stx12           |
| GO_MF_mfGO:000833arachidonic acid1/520            | 38/23049  | 0.580137 | 0.755242 | 0.687213 | Cyp2c38         |
| GO_MF_mfGO:003055cyclic nucleotide1/520           | 38/23049  | 0.580137 | 0.755242 | 0.687213 | Prkar1b         |
| GO_MF_mfGO:004205chemoattractant1/520             | 38/23049  | 0.580137 | 0.755242 | 0.687213 | Ccl5            |
| GO_MF_mfGO:006059ATPase regulator1/520            | 38/23049  | 0.580137 | 0.755242 | 0.687213 | Fnip2           |
| GO_MF_mfGO:001665oxidoreductase2/520              | 86/23049  | 0.581045 | 0.755242 | 0.687213 | Dld/Nxn12       |
| GO_MF_mfGO:000371transcription factor4/520        | 180/23049 | 0.581462 | 0.755242 | 0.687213 | Bend6/Scal3     |
| GO_MF_mfGO:001988protein kinase4/520              | 181/23049 | 0.58584  | 0.757282 | 0.689069 | Ccl5/Lrrtm1     |
| GO_MF_mfGO:001510chloride transporter2/520        | 87/23049  | 0.587349 | 0.757282 | 0.689069 | Clcn1/Slc12a1   |
| GO_MF_mfGO:001514carbohydrate1/520                | 39/23049  | 0.589625 | 0.757282 | 0.689069 | Slc2a10         |
| GO_MF_mfGO:001548cholesterol1/520                 | 39/23049  | 0.589625 | 0.757282 | 0.689069 | Ptch1           |
| GO_MF_mfGO:001622steroid dehydrogenase1/520       | 39/23049  | 0.589625 | 0.757282 | 0.689069 | Srd5a1          |
| GO_MF_mfGO:004339proteoglycan1/520                | 39/23049  | 0.589625 | 0.757282 | 0.689069 | Ptprf           |
| GO_MF_mfGO:004418protein bin1/520                 | 39/23049  | 0.589625 | 0.757282 | 0.689069 | Mkks            |
| GO_MF_mfGO:000808N-acetyltransferase2/520         | 88/23049  | 0.593584 | 0.760326 | 0.691839 | Atat1/Naa20ac   |
| GO_MF_mfGO:014009catalytic activity4/520          | 183/23049 | 0.594518 | 0.760326 | 0.691839 | Dnase1l3/Il13   |
| GO_MF_mfGO:001507monovalent cation8/520           | 369/23049 | 0.594832 | 0.760326 | 0.691839 | Grik2/Grik4     |



|                                      |           |          |          |          |             |
|--------------------------------------|-----------|----------|----------|----------|-------------|
| GO_MF_mfGO:000417aminopept 1/520     | 40/23049  | 0.598899 | 0.761305 | 0.69273  | Lap3        |
| GO_MF_mfGO:001706snRNA bin 1/520     | 40/23049  | 0.598899 | 0.761305 | 0.69273  | Isg20       |
| GO_MF_mfGO:001921deacetylase 1/520   | 40/23049  | 0.598899 | 0.761305 | 0.69273  | Ndst2       |
| GO_MF_mfGO:001508calcium ion 3/520   | 137/23049 | 0.600247 | 0.761305 | 0.69273  | Catsper4/C  |
| GO_MF_mfGO:000392GTPase act 6/520    | 278/23049 | 0.600333 | 0.761305 | 0.69273  | Diras1/Gnc  |
| GO_MF_mfGO:005108unfolded p 2/520    | 90/23049  | 0.60584  | 0.767034 | 0.697943 | Cryaa/Mkk   |
| GO_MF_mfGO:006163ubiquitin p 5/520   | 233/23049 | 0.606758 | 0.767034 | 0.697943 | Med30/Rnf   |
| GO_MF_mfGO:000504signal sequ 1/520   | 41/23049  | 0.607964 | 0.767352 | 0.698232 | Tnpo2       |
| GO_MF_mfGO:000371transcriptic 10/520 | 467/23049 | 0.610965 | 0.769855 | 0.70051  | Aire/Bend6  |
| GO_MF_mfGO:000524voltage-ga 2/520    | 91/23049  | 0.611863 | 0.769855 | 0.70051  | Kcnh3/Kcnj  |
| GO_MF_mfGO:000551calmodulin 4/520    | 188/23049 | 0.615734 | 0.773516 | 0.70384  | Grm4/Map    |
| GO_MF_mfGO:000452endodeoxy 1/520     | 42/23049  | 0.616824 | 0.773677 | 0.703987 | Dnase1l3    |
| GO_MF_mfGO:006165ubiquitin-li 5/520  | 237/23049 | 0.621747 | 0.774869 | 0.705072 | Med30/Rnf   |
| GO_MF_mfGO:000115enhancer s 2/520    | 93/23049  | 0.623696 | 0.774869 | 0.705072 | Sox10/Tfap  |
| GO_MF_mfGO:00151c inorganic a 3/520  | 142/23049 | 0.624481 | 0.774869 | 0.705072 | Cln1/Slc12  |
| GO_MF_mfGO:00052c extracellula 1/520 | 43/23049  | 0.625485 | 0.774869 | 0.705072 | Col27a1     |
| GO_MF_mfGO:00080c chemokine 1/520    | 43/23049  | 0.625485 | 0.774869 | 0.705072 | Ccl5        |
| GO_MF_mfGO:00329c sterol bindi 1/520 | 43/23049  | 0.625485 | 0.774869 | 0.705072 | Ptch1       |
| GO_MF_mfGO:00428c actinin bin 1/520  | 43/23049  | 0.625485 | 0.774869 | 0.705072 | Mybph       |
| GO_MF_mfGO:00506c NADP bind 1/520    | 43/23049  | 0.625485 | 0.774869 | 0.705072 | Srd5a1      |
| GO_MF_mfGO:00152c symporter 3/520    | 143/23049 | 0.629206 | 0.778279 | 0.708175 | Slc12a7/Slc |
| GO_MF_mfGO:000524voltage-ga 1/520    | 44/23049  | 0.63395  | 0.781742 | 0.711326 | Catsper4    |
| GO_MF_mfGO:00426c peptide an 1/520   | 44/23049  | 0.63395  | 0.781742 | 0.711326 | Dhcr24      |
| GO_MF_mfGO:000481aminoacyl- 1/520    | 45/23049  | 0.642224 | 0.787029 | 0.716136 | Vars        |
| GO_MF_mfGO:00167c oxidoreduc 1/520   | 45/23049  | 0.642224 | 0.787029 | 0.716136 | Kdm4b       |
| GO_MF_mfGO:001687ligase activ 1/520  | 45/23049  | 0.642224 | 0.787029 | 0.716136 | Vars        |
| GO_MF_mfGO:00080c growth fac 3/520   | 146/23049 | 0.643132 | 0.787029 | 0.716136 | Areg/Bmp2   |
| GO_MF_mfGO:00349c immunogl 3/520     | 146/23049 | 0.643132 | 0.787029 | 0.716136 | Ighv1-53/Ig |
| GO_MF_mfGO:00198c growth fac 3/520   | 147/23049 | 0.647691 | 0.791403 | 0.720117 | Ghrhr/Il10r |
| GO_MF_mfGO:000837acetylgalac 1/520   | 46/23049  | 0.650312 | 0.792198 | 0.72084  | B3gnt6      |
| GO_MF_mfGO:004802CCR chem 1/520      | 46/23049  | 0.650312 | 0.792198 | 0.72084  | Ccl5        |
| GO_MF_mfGO:00152c secondary 5/520    | 247/23049 | 0.657693 | 0.798199 | 0.726301 | Slc12a7/Slc |
| GO_MF_mfGO:00167c thiolester h 1/520 | 47/23049  | 0.658216 | 0.798199 | 0.726301 | Them4       |
| GO_MF_mfGO:00451c translation 1/520  | 47/23049  | 0.658216 | 0.798199 | 0.726301 | Aire        |
| GO_MF_mfGO:001661oxidoreduc 3/520    | 151/23049 | 0.665513 | 0.804131 | 0.731698 | Bmp2/Dhcr   |
| GO_MF_mfGO:000804enzyme ac 9/520     | 441/23049 | 0.666109 | 0.804131 | 0.731698 | Abr/Arhgap  |
| GO_MF_mfGO:004687metal ion t 9/520   | 441/23049 | 0.666109 | 0.804131 | 0.731698 | Catsper4/C  |
| GO_MF_mfGO:000484ubiquitin-c 9/520   | 443/23049 | 0.671293 | 0.809175 | 0.736288 | Ccnf/Fbxo4  |
| GO_MF_mfGO:00011c RNA polyr 1/520    | 49/23049  | 0.673495 | 0.809402 | 0.736495 | Dusp26      |
| GO_MF_mfGO:000374translation 1/520   | 49/23049  | 0.673495 | 0.809402 | 0.736495 | Dhx29       |
| GO_MF_mfGO:00192c kinase regl 4/520  | 203/23049 | 0.675092 | 0.809562 | 0.73664  | Ccl5/Lrrtm1 |
| GO_MF_mfGO:001701Ras GTPase 8/520    | 397/23049 | 0.675642 | 0.809562 | 0.73664  | Abr/Exoc1/  |
| GO_MF_mfGO:00082c metalloexo 1/520   | 50/23049  | 0.680877 | 0.813411 | 0.740142 | Lap3        |
| GO_MF_mfGO:001687ligase activ 1/520  | 50/23049  | 0.680877 | 0.813411 | 0.740142 | Ttll4       |
| GO_MF_mfGO:000532neurotrans 1/520    | 51/23049  | 0.688092 | 0.815681 | 0.742208 | Slc18a3     |
| GO_MF_mfGO:00168c intramolec 1/520   | 51/23049  | 0.688092 | 0.815681 | 0.742208 | Pdia3       |
| GO_MF_mfGO:001704peptide ho 1/520    | 51/23049  | 0.688092 | 0.815681 | 0.742208 | Ghrhr       |
| GO_MF_mfGO:003014manganes 1/520      | 51/23049  | 0.688092 | 0.815681 | 0.742208 | Lap3        |

|                                     |           |          |          |          |              |
|-------------------------------------|-----------|----------|----------|----------|--------------|
| GO_MF_mfGO:19909cATP-deper1/520     | 51/23049  | 0.688092 | 0.815681 | 0.742208 | BC048507     |
| GO_MF_mfGO:001641N-acyltran:2/520   | 105/23049 | 0.688865 | 0.815681 | 0.742208 | Atat1/Naa2   |
| GO_MF_mfGO:00168chydro-lyas1/520    | 52/23049  | 0.695145 | 0.821907 | 0.747873 | Car6         |
| GO_MF_mfGO:000454ribonucleas2/520   | 107/23049 | 0.698776 | 0.824236 | 0.749992 | Dis3/Isg20   |
| GO_MF_mfGO:00526ccarboxylic c3/520  | 159/23049 | 0.699165 | 0.824236 | 0.749992 | Ces1b/Nlgi   |
| GO_MF_mfGO:01400ccatalytic ac7/520  | 360/23049 | 0.706119 | 0.830694 | 0.755868 | Trmo/Ddx4    |
| GO_MF_mfGO:000371transcriptic5/520  | 262/23049 | 0.707344 | 0.830694 | 0.755868 | Helz2/Myo    |
| GO_MF_mfGO:00055C copper ion1/520   | 54/23049  | 0.708776 | 0.830694 | 0.755868 | Prn          |
| GO_MF_mfGO:009951ion antipor1/520   | 54/23049  | 0.708776 | 0.830694 | 0.755868 | Slc37a2      |
| GO_MF_mfGO:000382antigen bir4/520   | 213/23049 | 0.710971 | 0.832053 | 0.757105 | Dhcr24/Igf   |
| GO_MF_mfGO:000814sulfotransfe1/520  | 55/23049  | 0.715362 | 0.835975 | 0.760674 | Ndst2        |
| GO_MF_mfGO:00197cubiquitin-li9/520  | 463/23049 | 0.720447 | 0.839335 | 0.763731 | Ccnf/Fbxo4   |
| GO_MF_mfGO:000004tRNA bindi1/520    | 56/23049  | 0.721798 | 0.839335 | 0.763731 | Rpl6l        |
| GO_MF_mfGO:000837acetylglucc1/520   | 56/23049  | 0.721798 | 0.839335 | 0.763731 | B3gnt6       |
| GO_MF_mfGO:000517integrin bir2/520  | 112/23049 | 0.722413 | 0.839335 | 0.763731 | Adam24/N     |
| GO_MF_mfGO:00355c signaling a1/520  | 57/23049  | 0.72809  | 0.844711 | 0.768623 | Khdrbs2      |
| GO_MF_mfGO:001507proton trar2/520   | 114/23049 | 0.731421 | 0.847352 | 0.771026 | Slc15a3/Slc  |
| GO_MF_mfGO:00037C steroid hor1/520  | 58/23049  | 0.73424  | 0.849394 | 0.772884 | Paqr6        |
| GO_MF_mfGO:001674transferase4/520   | 221/23049 | 0.737529 | 0.851974 | 0.775231 | Atat1/Dlat/  |
| GO_MF_mfGO:00617cpeptide-lyc1/520   | 59/23049  | 0.740251 | 0.85389  | 0.776975 | Atat1        |
| GO_MF_mfGO:000801microtubul4/520    | 223/23049 | 0.743873 | 0.85684  | 0.779659 | Ccdc187/A    |
| GO_MF_mfGO:00036c damaged [1/520    | 60/23049  | 0.746126 | 0.856979 | 0.779786 | Kdm4d        |
| GO_MF_mfGO:000817RNA methy1/520     | 60/23049  | 0.746126 | 0.856979 | 0.779786 | Trmo         |
| GO_MF_mfGO:004282histone de:2/520   | 118/23049 | 0.748693 | 0.8587   | 0.781352 | Hes1/Tcf21   |
| GO_MF_mfGO:001671oxidoreduc1/520    | 61/23049  | 0.751868 | 0.859799 | 0.782352 | Cyp2c38      |
| GO_MF_mfGO:00048cserine-typec2/520  | 119/23049 | 0.752859 | 0.859799 | 0.782352 | Itih1/Serpir |
| GO_MF_mfGO:01401C catalytic ac2/520 | 119/23049 | 0.752859 | 0.859799 | 0.782352 | Trmo/Vars    |
| GO_MF_mfGO:00055C iron ion bir3/520 | 175/23049 | 0.75864  | 0.865172 | 0.787241 | Cyp2c38/Fr   |
| GO_MF_mfGO:001687ligase activ3/520  | 176/23049 | 0.762021 | 0.867072 | 0.788969 | Slc27a4/Ttl  |
| GO_MF_mfGO:00190C GDP bindir1/520   | 63/23049  | 0.762967 | 0.867072 | 0.788969 | Rhob         |
| GO_MF_mfGO:00312csmall GTPa8/520    | 435/23049 | 0.768139 | 0.867072 | 0.788969 | Abr/Exoc1/   |
| GO_MF_mfGO:003037ligand-dec1/520    | 64/23049  | 0.76833  | 0.867072 | 0.788969 | Helz2        |
| GO_MF_mfGO:00483c Rac GTPasc1/520   | 64/23049  | 0.76833  | 0.867072 | 0.788969 | Fmn11        |
| GO_MF_mfGO:001682lyase activi:3/520 | 178/23049 | 0.768667 | 0.867072 | 0.788969 | Car6/Ggct/   |
| GO_MF_mfGO:00047C signal trans2/520 | 123/23049 | 0.768933 | 0.867072 | 0.788969 | Map3k13/1    |
| GO_MF_mfGO:000531lipid transp2/520  | 123/23049 | 0.768933 | 0.867072 | 0.788969 | Preli3a/Tr   |
| GO_MF_mfGO:00515ciron-sulfur1/520   | 65/23049  | 0.773571 | 0.869861 | 0.791508 | Fdx1         |
| GO_MF_mfGO:005154metal clust1/520   | 65/23049  | 0.773571 | 0.869861 | 0.791508 | Fdx1         |
| GO_MF_mfGO:000471non-memk1/520      | 66/23049  | 0.778694 | 0.871655 | 0.79314  | Hck          |
| GO_MF_mfGO:003097receptor ty1/520   | 66/23049  | 0.778694 | 0.871655 | 0.79314  | Ptprf        |
| GO_MF_mfGO:004362protein sel1/520   | 66/23049  | 0.778694 | 0.871655 | 0.79314  | Ccl5         |
| GO_MF_mfGO:000802protein C-t4/520   | 235/23049 | 0.779503 | 0.871655 | 0.79314  | Atxn2/Pdzc   |
| GO_MF_mfGO:00423c histone bin3/520  | 182/23049 | 0.781506 | 0.871934 | 0.793394 | Aire/Spin2c  |
| GO_MF_mfGO:00009cRNA polymr1/520    | 67/23049  | 0.783701 | 0.871934 | 0.793394 | Sox10        |
| GO_MF_mfGO:00431cubiquitin b1/520   | 67/23049  | 0.783701 | 0.871934 | 0.793394 | Ubap1l       |
| GO_MF_mfGO:01400cmodificatic2/520   | 127/23049 | 0.78409  | 0.871934 | 0.793394 | Spin2d/Uhi   |
| GO_MF_mfGO:001712SH3 domai2/520     | 128/23049 | 0.78774  | 0.874524 | 0.795751 | Khdrbs2/N    |
| GO_MF_mfGO:00302cprotein kin.1/520  | 68/23049  | 0.788595 | 0.874524 | 0.795751 | Ccl5         |

|                                    |           |          |          |          |             |
|------------------------------------|-----------|----------|----------|----------|-------------|
| GO_MF_mfGO:000373mRNA 3'-L1/520    | 69/23049  | 0.793378 | 0.878617 | 0.799475 | Hnrnpr      |
| GO_MF_mfGO:000508Rho guany1/520    | 70/23049  | 0.798054 | 0.880158 | 0.800877 | Abr         |
| GO_MF_mfGO:001984rRNA bindi1/520   | 70/23049  | 0.798054 | 0.880158 | 0.800877 | Rpl6l       |
| GO_MF_mfGO:009711scaffold prc1/520 | 70/23049  | 0.798054 | 0.880158 | 0.800877 | Nlgn1       |
| GO_MF_mfGO:004432ion channe2/520   | 132/23049 | 0.801804 | 0.882776 | 0.803259 | Lrrk2/Trpc1 |
| GO_MF_mfGO:001659amino acid1/520   | 71/23049  | 0.802624 | 0.882776 | 0.803259 | Thnsl2      |
| GO_MF_mfGO:000554phosphatic1/520   | 73/23049  | 0.811456 | 0.890435 | 0.810229 | Exoc1       |
| GO_MF_mfGO:001661oxidoreduc2/520   | 135/23049 | 0.811802 | 0.890435 | 0.810229 | Bmp2/Hpg    |
| GO_MF_mfGO:000525chloride ch1/520  | 74/23049  | 0.815723 | 0.892302 | 0.811927 | Clcn1       |
| GO_MF_mfGO:003143mitogen-a1/520    | 74/23049  | 0.815723 | 0.892302 | 0.811927 | Trib2       |
| GO_MF_mfGO:000203p53 bindin1/520   | 75/23049  | 0.819894 | 0.893218 | 0.812761 | Dusp26      |
| GO_MF_mfGO:001678transferase1/520  | 75/23049  | 0.819894 | 0.893218 | 0.812761 | Ndst2       |
| GO_MF_mfGO:001920kinase acti1/520  | 75/23049  | 0.819894 | 0.893218 | 0.812761 | Ccl5        |
| GO_MF_mfGO:004227peptide bir5/520  | 306/23049 | 0.822997 | 0.894025 | 0.813495 | Dhcr24/Gh   |
| GO_MF_mfGO:001674transferase4/520  | 252/23049 | 0.823126 | 0.894025 | 0.813495 | Atat1/Dlat/ |
| GO_MF_mfGO:001529antiporter1/520   | 76/23049  | 0.823971 | 0.894025 | 0.813495 | Slc37a2     |
| GO_MF_mfGO:003361activating t1/520 | 77/23049  | 0.827955 | 0.897138 | 0.816327 | Dusp26      |
| GO_MF_mfGO:000816methyltran3/520   | 199/23049 | 0.829656 | 0.897771 | 0.816903 | Trmo/Armt   |
| GO_MF_mfGO:001919transmemt1/520    | 78/23049  | 0.83185  | 0.898934 | 0.817962 | Tgfb1       |
| GO_MF_mfGO:001670oxidoreduc3/520   | 202/23049 | 0.837139 | 0.902218 | 0.82095  | Cyp2c38/Fr  |
| GO_MF_mfGO:000815UDP-glyco2/520    | 144/23049 | 0.839149 | 0.902218 | 0.82095  | B3gnt6/Ug   |
| GO_MF_mfGO:000470MAP kinas1/520    | 80/23049  | 0.839377 | 0.902218 | 0.82095  | Map3k13     |
| GO_MF_mfGO:004802monosaccl1/520    | 80/23049  | 0.839377 | 0.902218 | 0.82095  | Hk1         |
| GO_MF_mfGO:002003heme bind2/520    | 145/23049 | 0.841955 | 0.90371  | 0.822307 | Cyp2c38/S   |
| GO_MF_mfGO:001620antioxidant1/520  | 81/23049  | 0.843013 | 0.90371  | 0.822307 | Nxn12       |
| GO_MF_mfGO:000449monooxyg2/520     | 146/23049 | 0.844717 | 0.903904 | 0.822484 | Cyp2c38/Fr  |
| GO_MF_mfGO:000377microtubul1/520   | 82/23049  | 0.846567 | 0.903904 | 0.822484 | BC048507    |
| GO_MF_mfGO:000813translation1/520  | 82/23049  | 0.846567 | 0.903904 | 0.822484 | Dhx29       |
| GO_MF_mfGO:000875S-adenosy2/520    | 148/23049 | 0.850108 | 0.906211 | 0.824583 | Trmo/Armt   |
| GO_MF_mfGO:000419cysteine-ty1/520  | 84/23049  | 0.853437 | 0.906211 | 0.824583 | Usp12       |
| GO_MF_mfGO:002280active trans6/520 | 376/23049 | 0.854252 | 0.906211 | 0.824583 | Slc12a7/Slc |
| GO_MF_mfGO:000827protein me1/520   | 85/23049  | 0.856755 | 0.906211 | 0.824583 | Armt1       |
| GO_MF_mfGO:003024carbohydrc4/520   | 268/23049 | 0.857429 | 0.906211 | 0.824583 | Grifin/Hk1/ |
| GO_MF_mfGO:000505signal trans2/520 | 151/23049 | 0.857877 | 0.906211 | 0.824583 | Map3k13/1   |
| GO_MF_mfGO:001990protein phc2/520  | 151/23049 | 0.857877 | 0.906211 | 0.824583 | Hsf4/Sh3rf  |
| GO_MF_mfGO:001674transferase3/520  | 211/23049 | 0.857911 | 0.906211 | 0.824583 | Trmo/Armt   |
| GO_MF_mfGO:000525anion chan1/520   | 86/23049  | 0.859999 | 0.906211 | 0.824583 | Clcn1       |
| GO_MF_mfGO:003218ubiquitin-li1/520 | 86/23049  | 0.859999 | 0.906211 | 0.824583 | Ubap1l      |
| GO_MF_mfGO:001508sodium ion2/520   | 153/23049 | 0.862851 | 0.908026 | 0.826235 | Grik2/Grik4 |
| GO_MF_mfGO:004690tetrapyrrolc2/520 | 154/23049 | 0.865277 | 0.909242 | 0.827341 | Cyp2c38/S   |
| GO_MF_mfGO:000817N-methyltr1/520   | 88/23049  | 0.866268 | 0.909242 | 0.827341 | Trmo        |
| GO_MF_mfGO:000372single-strai1/520 | 89/23049  | 0.869297 | 0.911231 | 0.829151 | Khdrbs2     |
| GO_MF_mfGO:000555pheromonc1/520    | 90/23049  | 0.872257 | 0.912025 | 0.829873 | Vmn1r202    |
| GO_MF_mfGO:000104core promc2/520   | 157/23049 | 0.872322 | 0.912025 | 0.829873 | Myod1/Tfa   |
| GO_MF_mfGO:000104core promc1/520   | 91/23049  | 0.87515  | 0.913793 | 0.831482 | Tfap2b      |
| GO_MF_mfGO:000552GTP bindin5/520   | 344/23049 | 0.890375 | 0.927818 | 0.844244 | Diras1/Gnl  |
| GO_MF_mfGO:000372mRNA binc3/520    | 228/23049 | 0.89089  | 0.927818 | 0.844244 | Rpl6l/Hnrn  |
| GO_MF_mfGO:000823exopeptida1/520   | 99/23049  | 0.896061 | 0.930792 | 0.84695  | Lap3        |

|                               |        |           |          |          |          |             |
|-------------------------------|--------|-----------|----------|----------|----------|-------------|
| GO_MF_mfGO:00165cpheromon     | 1/520  | 99/23049  | 0.896061 | 0.930792 | 0.84695  | Vmn1r202    |
| GO_MF_mfGO:00325Epurine ribo  | 5/520  | 349/23049 | 0.897353 | 0.930931 | 0.847076 | Diras1/Gnl  |
| GO_MF_mfGO:00018Epurine nucl  | 5/520  | 353/23049 | 0.902655 | 0.932952 | 0.848916 | Diras1/Gnl  |
| GO_MF_mfGO:00036Esingle-strai | 1/520  | 102/23049 | 0.902968 | 0.932952 | 0.848916 | D330045A    |
| GO_MF_mfGO:19029Ephosphatic   | 1/520  | 102/23049 | 0.902968 | 0.932952 | 0.848916 | Exoc1       |
| GO_MF_mfGO:00325Eribonucleo   | 5/520  | 354/23049 | 0.903943 | 0.932952 | 0.848916 | Diras1/Gnl  |
| GO_MF_mfGO:00018Enucleoside   | 5/520  | 364/23049 | 0.916026 | 0.944038 | 0.859003 | Diras1/Gnl  |
| GO_MF_mfGO:00325Eguanyl ribc  | 5/520  | 366/23049 | 0.918276 | 0.944038 | 0.859003 | Diras1/Gnl  |
| GO_MF_mfGO:00508Ecell adhesi  | 7/520  | 480/23049 | 0.91872  | 0.944038 | 0.859003 | Adam24/C    |
| GO_MF_mfGO:00190Eguanyl nuc   | 5/520  | 367/23049 | 0.91938  | 0.944038 | 0.859003 | Diras1/Gnl  |
| GO_MF_mfGO:00426ATPase act    | 5/520  | 377/23049 | 0.929724 | 0.953442 | 0.867559 | BC048507/   |
| GO_MF_mfGO:00050Eguanyl-nuc   | 2/520  | 192/23049 | 0.93283  | 0.954876 | 0.868865 | Abr/Dis3    |
| GO_MF_mfGO:00452Ecadherin bi  | 4/520  | 321/23049 | 0.933498 | 0.954876 | 0.868865 | Cd46/Cdh2   |
| GO_MF_mfGO:00167Etransferase  | 2/520  | 199/23049 | 0.941106 | 0.960527 | 0.874006 | B3gnt6/Ug   |
| GO_MF_mfGO:00050ERas guanyl   | 1/520  | 124/23049 | 0.941412 | 0.960527 | 0.874006 | Abr         |
| GO_MF_mfGO:00474Eprotein N-   | 1/520  | 126/23049 | 0.94404  | 0.961723 | 0.875095 | Grin2c      |
| GO_MF_mfGO:00199Ephosphata    | 2/520  | 203/23049 | 0.945391 | 0.961723 | 0.875095 | Hsf4/Sh3rf  |
| GO_MF_mfGO:000554phospholi    | 5/520  | 396/23049 | 0.946173 | 0.961723 | 0.875095 | Exoc1/Pacs  |
| GO_MF_mfGO:000377motor acti   | 1/520  | 130/23049 | 0.948948 | 0.963325 | 0.876553 | BC048507    |
| GO_MF_mfGO:00167Etransferase  | 3/520  | 277/23049 | 0.951024 | 0.964216 | 0.877363 | B3gnt6/St6  |
| GO_MF_mfGO:003107heat shock   | 1/520  | 135/23049 | 0.954483 | 0.966504 | 0.879445 | Atf5        |
| GO_MF_mfGO:00314Ccarboxylic   | 2/520  | 214/23049 | 0.955698 | 0.966517 | 0.879457 | Slc19a1/Th  |
| GO_MF_mfGO:00430Eribonucleo   | 1/520  | 140/23049 | 0.959419 | 0.968171 | 0.880962 | Dhx29       |
| GO_MF_mfGO:004317organic aci  | 2/520  | 219/23049 | 0.959742 | 0.968171 | 0.880962 | Slc19a1/Th  |
| GO_MF_mfGO:00020Eprotease bi  | 1/520  | 148/23049 | 0.966229 | 0.972584 | 0.884978 | 9230104L0   |
| GO_MF_mfGO:000534organic aci  | 1/520  | 150/23049 | 0.967745 | 0.972584 | 0.884978 | Slc19a1     |
| GO_MF_mfGO:004694carboxylic   | 2/520  | 150/23049 | 0.967745 | 0.972584 | 0.884978 | Slc19a1     |
| GO_MF_mfGO:000471protein tyr  | 1/520  | 152/23049 | 0.969194 | 0.972824 | 0.885196 | Hck         |
| GO_MF_mfGO:19019Ephosphatic   | 1/520  | 155/23049 | 0.971245 | 0.973667 | 0.885963 | Exoc1       |
| GO_MF_mfGO:00168EATPase act   | 5/520  | 449/23049 | 0.975322 | 0.976536 | 0.888574 | BC048507/   |
| GO_MF_mfGO:00350Ephosphatic   | 1/520  | 242/23049 | 0.996119 | 0.996119 | 0.906392 | Exoc1       |
| GO_MF_mfGO:004827mitogen-a    | 3/690  | 7/23049   | 0.000854 | 0.323587 | 0.304853 | Dusp10/Mi   |
| GO_MF_mfGO:00507Eadvanced     | 2/690  | 2/23049   | 0.000895 | 0.323587 | 0.304853 | Ager/Lgals  |
| GO_MF_mfGO:00152Edrug trans   | 10/690 | 102/23049 | 0.000971 | 0.323587 | 0.304853 | Abcb1b/Ak   |
| GO_MF_mfGO:00046Elysophosph   | 4/690  | 17/23049  | 0.001388 | 0.347043 | 0.326951 | Abhd4/Gdq   |
| GO_MF_mfGO:00168Ehydrolase    | 2/690  | 3/23049   | 0.002631 | 0.378061 | 0.356173 | Fah/Kynu    |
| GO_MF_mfGO:00168Ehydrolase    | 2/690  | 3/23049   | 0.002631 | 0.378061 | 0.356173 | Fah/Kynu    |
| GO_MF_mfGO:000531lipid trans  | 10/690 | 123/23049 | 0.003918 | 0.378061 | 0.356173 | Abcb4/Abc   |
| GO_MF_mfGO:00055Emannose b    | 4/690  | 23/23049  | 0.00448  | 0.378061 | 0.356173 | Lman1l/Ma   |
| GO_MF_mfGO:00152Ewater chan   | 3/690  | 12/23049  | 0.004801 | 0.378061 | 0.356173 | Aqp12/Aq    |
| GO_MF_mfGO:007234modified a   | 3/690  | 12/23049  | 0.004801 | 0.378061 | 0.356173 | Folr1/Slc16 |
| GO_MF_mfGO:00191Edeoxynucl    | 2/690  | 4/23049   | 0.005158 | 0.378061 | 0.356173 | Dguok/Tk1   |
| GO_MF_mfGO:00054E SNAP rece   | 5/690  | 38/23049  | 0.005251 | 0.378061 | 0.356173 | Bet1/Sec2   |
| GO_MF_mfGO:000537water trans  | 3/690  | 13/23049  | 0.006104 | 0.378061 | 0.356173 | Aqp12/Aq    |
| GO_MF_mfGO:00430E cysteine-ty | 5/690  | 41/23049  | 0.007286 | 0.378061 | 0.356173 | Bcl10/Dpe   |
| GO_MF_mfGO:00040E carbonate   | 3/690  | 14/23049  | 0.007597 | 0.378061 | 0.356173 | Car2/Car4/  |
| GO_MF_mfGO:00083E low voltag  | 2/690  | 5/23049   | 0.008427 | 0.378061 | 0.356173 | Cacna1g/C   |
| GO_MF_mfGO:00167E oxidoreduc  | 3/690  | 15/23049  | 0.009288 | 0.378061 | 0.356173 | Aox3/Cyp1   |

|                                      |           |          |          |          |             |
|--------------------------------------|-----------|----------|----------|----------|-------------|
| GO_MF_mzGO:01401C catalytic ac9/690  | 119/23049 | 0.009582 | 0.378061 | 0.356173 | Dalrd3/Du   |
| GO_MF_mzGO:000524voltage-ga5/690     | 44/23049  | 0.009815 | 0.378061 | 0.356173 | Cacna1b/C   |
| GO_MF_mzGO:004302 cysteine-ty4/690   | 30/23049  | 0.011758 | 0.378061 | 0.356173 | Dpep1/Ga    |
| GO_MF_mzGO:000855 xenobiotic 2/690   | 6/23049   | 0.01239  | 0.378061 | 0.356173 | Abcb1b/Ak   |
| GO_MF_mzGO:007027 phosphatic4/690    | 32/23049  | 0.014722 | 0.378061 | 0.356173 | Mbl1/Mbl2   |
| GO_MF_mzGO:005101 mitogen-a4/690     | 33/23049  | 0.016365 | 0.378061 | 0.356173 | Dusp10/Du   |
| GO_MF_mzGO:000817 N-methyltr7/690    | 88/23049  | 0.016418 | 0.378061 | 0.356173 | Camkmt/D    |
| GO_MF_mzGO:005186 glycolipid k3/690  | 19/23049  | 0.018104 | 0.378061 | 0.356173 | Plekha8/Rt  |
| GO_MF_mzGO:000541 glucose:so2/690    | 8/23049   | 0.022228 | 0.378061 | 0.356173 | Gm5134/SI   |
| GO_MF_mzGO:001519 L-serine tr2/690   | 8/23049   | 0.022228 | 0.378061 | 0.356173 | Slc1a4/Slc1 |
| GO_MF_mzGO:002288 serine tran2/690   | 8/23049   | 0.022228 | 0.378061 | 0.356173 | Slc1a4/Slc1 |
| GO_MF_mzGO:004291 xenobiotic 2/690   | 8/23049   | 0.022228 | 0.378061 | 0.356173 | Abcb1b/Ak   |
| GO_MF_mzGO:001524 sterol trans3/690  | 21/23049  | 0.023778 | 0.378061 | 0.356173 | Abcg4/Apc   |
| GO_MF_mzGO:014009 catalytic ac18/690 | 360/23049 | 0.024296 | 0.378061 | 0.356173 | Ang6/Cnot   |
| GO_MF_mzGO:000122 transcriptic13/690 | 235/23049 | 0.025274 | 0.378061 | 0.356173 | Dmbx1/Fez   |
| GO_MF_mzGO:000814 cAMP resp2/690     | 9/23049   | 0.028018 | 0.378061 | 0.356173 | Ddit3/Sik1  |
| GO_MF_mzGO:001514 carbohydr2/690     | 39/23049  | 0.028606 | 0.378061 | 0.356173 | Aqp9/Gm5    |
| GO_MF_mzGO:000117 RNA polym1/690     | 1/23049   | 0.029936 | 0.378061 | 0.356173 | Polr1e      |
| GO_MF_mzGO:000158 Gq/11-cou1/690     | 1/23049   | 0.029936 | 0.378061 | 0.356173 | Htr2c       |
| GO_MF_mzGO:000176 aminocarb1/690     | 1/23049   | 0.029936 | 0.378061 | 0.356173 | Acmsd       |
| GO_MF_mzGO:000394 N4-(beta-l1/690    | 1/23049   | 0.029936 | 0.378061 | 0.356173 | Aga         |
| GO_MF_mzGO:000413 deoxyguan1/690     | 1/23049   | 0.029936 | 0.378061 | 0.356173 | Dguok       |
| GO_MF_mzGO:000433 fumarylac1/690     | 1/23049   | 0.029936 | 0.378061 | 0.356173 | Fah         |
| GO_MF_mzGO:000456 beta-manr1/690     | 1/23049   | 0.029936 | 0.378061 | 0.356173 | Manba       |
| GO_MF_mzGO:000457 mannosyl-1/690     | 1/23049   | 0.029936 | 0.378061 | 0.356173 | Mogs        |
| GO_MF_mzGO:000458 dolichyl-pt1/690   | 1/23049   | 0.029936 | 0.378061 | 0.356173 | Pigv        |
| GO_MF_mzGO:000463 phosphom1/690      | 1/23049   | 0.029936 | 0.378061 | 0.356173 | Pmvk        |
| GO_MF_mzGO:000487 compleme1/690      | 1/23049   | 0.029936 | 0.378061 | 0.356173 | C3ar1       |
| GO_MF_mzGO:000493 thyroid-stir1/690  | 1/23049   | 0.029936 | 0.378061 | 0.356173 | Tshr        |
| GO_MF_mzGO:000514 interleukin-1/690  | 1/23049   | 0.029936 | 0.378061 | 0.356173 | Il13        |
| GO_MF_mzGO:000811 nicotinamic1/690   | 1/23049   | 0.029936 | 0.378061 | 0.356173 | Nnmt        |
| GO_MF_mzGO:000838 steroid 7-a1/690   | 1/23049   | 0.029936 | 0.378061 | 0.356173 | Cyp39a1     |
| GO_MF_mzGO:000839 sterol 14-d1/690   | 1/23049   | 0.029936 | 0.378061 | 0.356173 | Cyp51       |
| GO_MF_mzGO:000843 calcitriol re1/690 | 1/23049   | 0.029936 | 0.378061 | 0.356173 | Vdr         |
| GO_MF_mzGO:000845 beta-galac1/690    | 1/23049   | 0.029936 | 0.378061 | 0.356173 | B3gnt5      |
| GO_MF_mzGO:000846 glycerate d1/690   | 1/23049   | 0.029936 | 0.378061 | 0.356173 | Grhpr       |
| GO_MF_mzGO:001519 L-threonin1/690    | 1/23049   | 0.029936 | 0.378061 | 0.356173 | Slc1a4      |
| GO_MF_mzGO:001708 glycolipid t1/690  | 1/23049   | 0.029936 | 0.378061 | 0.356173 | Plekha8     |
| GO_MF_mzGO:001802 calmodulin1/690    | 1/23049   | 0.029936 | 0.378061 | 0.356173 | Camkmt      |
| GO_MF_mzGO:001914 ADP-sugar1/690     | 1/23049   | 0.029936 | 0.378061 | 0.356173 | Nudt5       |
| GO_MF_mzGO:001978 ISG15-spec1/690    | 1/23049   | 0.029936 | 0.378061 | 0.356173 | Usp18       |
| GO_MF_mzGO:003042 kynurenina1/690    | 1/23049   | 0.029936 | 0.378061 | 0.356173 | Kynu        |
| GO_MF_mzGO:003177 type 1 hyp1/690    | 1/23049   | 0.029936 | 0.378061 | 0.356173 | Hcrt        |
| GO_MF_mzGO:003177 type 2 hyp1/690    | 1/23049   | 0.029936 | 0.378061 | 0.356173 | Hcrt        |
| GO_MF_mzGO:003235 oxidized pj1/690   | 1/23049   | 0.029936 | 0.378061 | 0.356173 | Rps3        |
| GO_MF_mzGO:003254 sulfiredoxir1/690  | 1/23049   | 0.029936 | 0.378061 | 0.356173 | Srxn1       |
| GO_MF_mzGO:003459 L-hydroxyr1/690    | 1/23049   | 0.029936 | 0.378061 | 0.356173 | Slc1a4      |
| GO_MF_mzGO:003818 lithocholic 1/690  | 1/23049   | 0.029936 | 0.378061 | 0.356173 | Vdr         |

|                                      |           |          |          |          |             |
|--------------------------------------|-----------|----------|----------|----------|-------------|
| GO_MF_mzGO:004232hypocretin 1/690    | 1/23049   | 0.029936 | 0.378061 | 0.356173 | Hcrt        |
| GO_MF_mzGO:004725lactosylcer:1/690   | 1/23049   | 0.029936 | 0.378061 | 0.356173 | B3gnt5      |
| GO_MF_mzGO:0047563-oxo-5-b 1/690     | 1/23049   | 0.029936 | 0.378061 | 0.356173 | Akr1d1      |
| GO_MF_mzGO:005051lactosylcer:1/690   | 1/23049   | 0.029936 | 0.378061 | 0.356173 | A4galt      |
| GO_MF_mzGO:005056glutamate- 1/690    | 1/23049   | 0.029936 | 0.378061 | 0.356173 | Ears2       |
| GO_MF_mzGO:0050571,5-anhydr 1/690    | 1/23049   | 0.029936 | 0.378061 | 0.356173 | Akr1e1      |
| GO_MF_mzGO:006165SUMO con 1/690      | 1/23049   | 0.029936 | 0.378061 | 0.356173 | Ube2i       |
| GO_MF_mzGO:0061963-hydroxyl 1/690    | 1/23049   | 0.029936 | 0.378061 | 0.356173 | Kynu        |
| GO_MF_mzGO:007000glutamic-t 1/690    | 1/23049   | 0.029936 | 0.378061 | 0.356173 | Astl        |
| GO_MF_mzGO:007037high mobil 1/690    | 1/23049   | 0.029936 | 0.378061 | 0.356173 | Ager        |
| GO_MF_mzGO:007061nucleosom 1/690     | 1/23049   | 0.029936 | 0.378061 | 0.356173 | Smarca1     |
| GO_MF_mzGO:190209calcitriol bi 1/690 | 1/23049   | 0.029936 | 0.378061 | 0.356173 | Vdr         |
| GO_MF_mzGO:190459advanced c 1/690    | 1/23049   | 0.029936 | 0.378061 | 0.356173 | Ager        |
| GO_MF_mzGO:004339heparan su3/690     | 23/23049  | 0.030302 | 0.378061 | 0.356173 | Fst/Hpse2/  |
| GO_MF_mzGO:002003heme bind 9/690     | 145/23049 | 0.030639 | 0.378061 | 0.356173 | Cyb5b/Cyc   |
| GO_MF_mzGO:003509phosphatic 13/690   | 242/23049 | 0.031052 | 0.378061 | 0.356173 | Arap2/Arh   |
| GO_MF_mzGO:001517amino acid6/690     | 80/23049  | 0.032752 | 0.378061 | 0.356173 | Slc16a12/S  |
| GO_MF_mzGO:004802monosaccl 6/690     | 80/23049  | 0.032752 | 0.378061 | 0.356173 | Lgals3/Lma  |
| GO_MF_mzGO:001517L-amino ac5/690     | 60/23049  | 0.033533 | 0.378061 | 0.356173 | Slc17a8/Slc |
| GO_MF_mzGO:004354phosphatic 4/690    | 41/23049  | 0.033626 | 0.378061 | 0.356173 | Hcst/lrs2/L |
| GO_MF_mzGO:000521structural c 3/690  | 24/23049  | 0.033881 | 0.378061 | 0.356173 | Bfsp2/Lim2  |
| GO_MF_mzGO:000875S-adenosy 9/690     | 148/23049 | 0.034285 | 0.378061 | 0.356173 | Camkmt/D    |
| GO_MF_mzGO:009700ceramide b 2/690    | 10/23049  | 0.034338 | 0.378061 | 0.356173 | Plekha8/Rt  |
| GO_MF_mzGO:000813protein tyr4/690    | 42/23049  | 0.036316 | 0.378061 | 0.356173 | Dupd1/Du    |
| GO_MF_mzGO:000534organic aci 9/690   | 150/23049 | 0.036876 | 0.378061 | 0.356173 | Abcc4/Folr  |
| GO_MF_mzGO:004694carboxylic i 9/690  | 150/23049 | 0.036876 | 0.378061 | 0.356173 | Abcc4/Folr  |
| GO_MF_mzGO:001920nucleobase 4/690    | 43/23049  | 0.039127 | 0.378061 | 0.356173 | Ak3/Dguok   |
| GO_MF_mzGO:000510fibroblast c 3/690  | 26/23049  | 0.041663 | 0.378061 | 0.356173 | Fgf17/Fgf4  |
| GO_MF_mzGO:000535glucose tra 3/690   | 26/23049  | 0.041663 | 0.378061 | 0.356173 | Gm5134/SI   |
| GO_MF_mzGO:004690tetrapyrrol 9/690   | 154/23049 | 0.042451 | 0.378061 | 0.356173 | Cyb5b/Cyc   |
| GO_MF_mzGO:000372mRNA binc 12/690    | 228/23049 | 0.042471 | 0.378061 | 0.356173 | Eif3a/Gemi  |
| GO_MF_mzGO:001920kinase regt 11/690  | 203/23049 | 0.042585 | 0.378061 | 0.356173 | Bcl10/Cnks  |
| GO_MF_mzGO:000486protein kin 6/690   | 86/23049  | 0.04423  | 0.378061 | 0.356173 | Dus2/Flrt1/ |
| GO_MF_mzGO:000481aminoacyl-4/690     | 45/23049  | 0.04511  | 0.378061 | 0.356173 | Dalrd3/Ear: |
| GO_MF_mzGO:001687ligase activ 4/690  | 45/23049  | 0.04511  | 0.378061 | 0.356173 | Dalrd3/Ear: |
| GO_MF_mzGO:001514hexose trar 3/690   | 27/23049  | 0.045861 | 0.378061 | 0.356173 | Gm5134/SI   |
| GO_MF_mzGO:000014SNARE bin 8/690     | 133/23049 | 0.04686  | 0.378061 | 0.356173 | Nbas/Sec2   |
| GO_MF_mzGO:000819metalloenc 2/690    | 12/23049  | 0.048421 | 0.378061 | 0.356173 | Lxn/Spock:  |
| GO_MF_mzGO:001701MAP kinas 2/690     | 12/23049  | 0.048421 | 0.378061 | 0.356173 | Dusp10/Du   |
| GO_MF_mzGO:003173CCR6 chen 2/690     | 12/23049  | 0.048421 | 0.378061 | 0.356173 | Defb33/De   |
| GO_MF_mzGO:005268carboxylic i 9/690  | 159/23049 | 0.050182 | 0.378061 | 0.356173 | Abhd4/Car   |
| GO_MF_mzGO:001921kinase inhil 6/690  | 89/23049  | 0.050802 | 0.378061 | 0.356173 | Dus2/Flrt1/ |
| GO_MF_mzGO:001514monosaccl 3/690     | 29/23049  | 0.054856 | 0.378061 | 0.356173 | Gm5134/SI   |
| GO_MF_mzGO:000373structural c 10/690 | 187/23049 | 0.055437 | 0.378061 | 0.356173 | Gm5093/N    |
| GO_MF_mzGO:000819phosphatic 2/690    | 13/23049  | 0.056115 | 0.378061 | 0.356173 | Plppr3/Plp  |
| GO_MF_mzGO:001642tRNA (guar 2/690    | 13/23049  | 0.056115 | 0.378061 | 0.356173 | Trmt11/Wc   |
| GO_MF_mzGO:001920nucleoside 2/690    | 13/23049  | 0.056115 | 0.378061 | 0.356173 | Dguok/Tk1   |
| GO_MF_mzGO:003354MAP kinas 2/690     | 13/23049  | 0.056115 | 0.378061 | 0.356173 | Dusp10/Du   |

|                                     |           |          |          |          |             |
|-------------------------------------|-----------|----------|----------|----------|-------------|
| GO_MF_mzGO:001679phosphatase1/690   | 265/23049 | 0.056699 | 0.378061 | 0.356173 | Alpl12/Dup  |
| GO_MF_mzGO:001670oxidoreduc4/690    | 49/23049  | 0.058517 | 0.378061 | 0.356173 | Akr1d1/Co   |
| GO_MF_mzGO:000122RNA polymr1/690    | 2/23049   | 0.058978 | 0.378061 | 0.356173 | Nfatc1      |
| GO_MF_mzGO:000163PLC activat1/690   | 2/23049   | 0.058978 | 0.378061 | 0.356173 | Grm1        |
| GO_MF_mzGO:000185compleme1/690      | 2/23049   | 0.058978 | 0.378061 | 0.356173 | C3ar1       |
| GO_MF_mzGO:000453deoxyribor1/690    | 2/23049   | 0.058978 | 0.378061 | 0.356173 | Dnase1      |
| GO_MF_mzGO:000453deoxyribor1/690    | 2/23049   | 0.058978 | 0.378061 | 0.356173 | Dnase2b     |
| GO_MF_mzGO:000479thymidine l1/690   | 2/23049   | 0.058978 | 0.378061 | 0.356173 | Tk1         |
| GO_MF_mzGO:000481glutamate-1/690    | 2/23049   | 0.058978 | 0.378061 | 0.356173 | Ears2       |
| GO_MF_mzGO:000482isoleucine-1/690   | 2/23049   | 0.058978 | 0.378061 | 0.356173 | Iars        |
| GO_MF_mzGO:000530creatine tra1/690  | 2/23049   | 0.058978 | 0.378061 | 0.356173 | Slc16a12    |
| GO_MF_mzGO:000817tRNA (guar1/690    | 2/23049   | 0.058978 | 0.378061 | 0.356173 | Wdr4        |
| GO_MF_mzGO:000835oxysterol 71/690   | 2/23049   | 0.058978 | 0.378061 | 0.356173 | Cyp39a1     |
| GO_MF_mzGO:000865rRNA (uridi1/690   | 2/23049   | 0.058978 | 0.378061 | 0.356173 | Mrm2        |
| GO_MF_mzGO:0008672,4-dienoy1/690    | 2/23049   | 0.058978 | 0.378061 | 0.356173 | Decr1       |
| GO_MF_mzGO:001513prostaglan1/690    | 2/23049   | 0.058978 | 0.378061 | 0.356173 | Abcc4       |
| GO_MF_mzGO:001645orexin rece1/690   | 2/23049   | 0.058978 | 0.378061 | 0.356173 | Hctr1       |
| GO_MF_mzGO:003062pre-mRNA1/690      | 2/23049   | 0.058978 | 0.378061 | 0.356173 | Snrpc       |
| GO_MF_mzGO:003547chylomicro1/690    | 2/23049   | 0.058978 | 0.378061 | 0.356173 | Lipc        |
| GO_MF_mzGO:003631phosphatic1/690    | 2/23049   | 0.058978 | 0.378061 | 0.356173 | Pik3ip1     |
| GO_MF_mzGO:003805RNA polymr1/690    | 2/23049   | 0.058978 | 0.378061 | 0.356173 | Esr2        |
| GO_MF_mzGO:003813neuregulin1/690    | 2/23049   | 0.058978 | 0.378061 | 0.356173 | Rtn4r       |
| GO_MF_mzGO:004261CD8 recept1/690    | 2/23049   | 0.058978 | 0.378061 | 0.356173 | Lck         |
| GO_MF_mzGO:0044718-oxo-dG1/690      | 2/23049   | 0.058978 | 0.378061 | 0.356173 | Nudt5       |
| GO_MF_mzGO:004515electron tra1/690  | 2/23049   | 0.058978 | 0.378061 | 0.356173 | Cyca        |
| GO_MF_mzGO:004518translation1/690   | 2/23049   | 0.058978 | 0.378061 | 0.356173 | Neurl1a     |
| GO_MF_mzGO:004552interleukin1/690   | 2/23049   | 0.058978 | 0.378061 | 0.356173 | Il27        |
| GO_MF_mzGO:004655alpha-L-ar1/690    | 2/23049   | 0.058978 | 0.378061 | 0.356173 | Otog        |
| GO_MF_mzGO:004689nucleoside1/690    | 2/23049   | 0.058978 | 0.378061 | 0.356173 | Ak3         |
| GO_MF_mzGO:004715betaine-hc1/690    | 2/23049   | 0.058978 | 0.378061 | 0.356173 | Bhmt        |
| GO_MF_mzGO:004778delta4-3-o1/690    | 2/23049   | 0.058978 | 0.378061 | 0.356173 | Akr1d1      |
| GO_MF_mzGO:006171folic acid r1/690  | 2/23049   | 0.058978 | 0.378061 | 0.356173 | Folr1       |
| GO_MF_mzGO:007171icosanoid t1/690   | 2/23049   | 0.058978 | 0.378061 | 0.356173 | Abcc4       |
| GO_MF_mzGO:0071881-(4-iodo-1/690    | 2/23049   | 0.058978 | 0.378061 | 0.356173 | Htr2c       |
| GO_MF_mzGO:008603calcium:so1/690    | 2/23049   | 0.058978 | 0.378061 | 0.356173 | Slc8a1      |
| GO_MF_mzGO:008605voltage-ga1/690    | 2/23049   | 0.058978 | 0.378061 | 0.356173 | Cacna1g     |
| GO_MF_mzGO:009913estrogen b1/690    | 2/23049   | 0.058978 | 0.378061 | 0.356173 | Esr2        |
| GO_MF_mzGO:009953G-protein r1/690   | 2/23049   | 0.058978 | 0.378061 | 0.356173 | Grm1        |
| GO_MF_mzGO:009958ion antipor1/690   | 2/23049   | 0.058978 | 0.378061 | 0.356173 | Slc8a1      |
| GO_MF_mzGO:190212lithocholic1/690   | 2/23049   | 0.058978 | 0.378061 | 0.356173 | Vdr         |
| GO_MF_mzGO:190227D3 vitamin1/690    | 2/23049   | 0.058978 | 0.378061 | 0.356173 | Vdr         |
| GO_MF_mzGO:190392estradiol bi1/690  | 2/23049   | 0.058978 | 0.378061 | 0.356173 | Esr2        |
| GO_MF_mzGO:190557ganglioside1/690   | 2/23049   | 0.058978 | 0.378061 | 0.356173 | Rtn4r       |
| GO_MF_mzGO:005111sugar trans3/690   | 30/23049  | 0.059644 | 0.379899 | 0.357905 | Gm5134/Sl   |
| GO_MF_mzGO:002280active trans17/690 | 376/23049 | 0.061356 | 0.38224  | 0.36011  | Abcb1b/Ak   |
| GO_MF_mzGO:004262ATPase act7/690    | 117/23049 | 0.06207  | 0.38224  | 0.36011  | Abcb1b/Ak   |
| GO_MF_mzGO:000531L-glutamat2/690    | 14/23049  | 0.064201 | 0.38224  | 0.36011  | Slc17a8/Slc |
| GO_MF_mzGO:004342bHLH trans3/690    | 31/23049  | 0.064622 | 0.38224  | 0.36011  | Ncapg2/Uk   |

|                   |              |        |           |          |         |         |             |
|-------------------|--------------|--------|-----------|----------|---------|---------|-------------|
| GO_MF_mzGO:004687 | ephrin recep | 3/690  | 31/23049  | 0.064622 | 0.38224 | 0.36011 | Efna1/Grb2  |
| GO_MF_mzGO:005069 | WW domain    | 3/690  | 31/23049  | 0.064622 | 0.38224 | 0.36011 | Tceal3/Tce  |
| GO_MF_mzGO:001529 | symporter    | 8/690  | 143/23049 | 0.066051 | 0.38224 | 0.36011 | Gm5134/SI   |
| GO_MF_mzGO:002284 | voltage-ga   | 8/690  | 143/23049 | 0.066051 | 0.38224 | 0.36011 | Cacna1b/C   |
| GO_MF_mzGO:00199C | syntaxin     | 6/690  | 96/23049  | 0.068348 | 0.38224 | 0.36011 | Sec22b/Sn   |
| GO_MF_mzGO:000472 | protein tyr  | 6/690  | 97/23049  | 0.071108 | 0.38224 | 0.36011 | Dupd1/Du    |
| GO_MF_mzGO:000851 | organic ani  | 11/690 | 222/23049 | 0.071266 | 0.38224 | 0.36011 | Abcc4/Folr  |
| GO_MF_mzGO:000472 | phosphopr    | 9/690  | 171/23049 | 0.072342 | 0.38224 | 0.36011 | Dupd1/Du    |
| GO_MF_mzGO:000449 | monooxyg     | 8/690  | 146/23049 | 0.072632 | 0.38224 | 0.36011 | Akr1d1/Co   |
| GO_MF_mzGO:001517 | acidic amin  | 2/690  | 15/23049  | 0.072649 | 0.38224 | 0.36011 | Slc17a8/Slc |
| GO_MF_mzGO:00162C | AMP bindin   | 2/690  | 15/23049  | 0.072649 | 0.38224 | 0.36011 | Prkag1/Prp  |
| GO_MF_mzGO:003054 | acetylcholin | 2/690  | 15/23049  | 0.072649 | 0.38224 | 0.36011 | Ly6g6d/Slu  |
| GO_MF_mzGO:00704C | NADPH bin    | 2/690  | 15/23049  | 0.072649 | 0.38224 | 0.36011 | Decr1/Grh   |
| GO_MF_mzGO:00996C | neurotrans   | 2/690  | 15/23049  | 0.072649 | 0.38224 | 0.36011 | Ly6g6d/Slu  |
| GO_MF_mzGO:004687 | metal ion t  | 19/690 | 441/23049 | 0.073093 | 0.38224 | 0.36011 | Atp1b4/Ca   |
| GO_MF_mzGO:00167C | transferase  | 4/690  | 53/23049  | 0.073812 | 0.38224 | 0.36011 | Art4/Parp1  |
| GO_MF_mzGO:00154C | P-P-bond-    | 7/690  | 123/23049 | 0.076634 | 0.38224 | 0.36011 | Abcb1b/Ak   |
| GO_MF_mzGO:00081C | methyltran   | 10/690 | 199/23049 | 0.077021 | 0.38224 | 0.36011 | Bhmt/Cam    |
| GO_MF_mzGO:00055C | copper ion   | 4/690  | 54/23049  | 0.077922 | 0.38224 | 0.36011 | Apoa4/F5/   |
| GO_MF_mzGO:00700C | RNA polyr    | 4/690  | 54/23049  | 0.077922 | 0.38224 | 0.36011 | ErbB2/Recc  |
| GO_MF_mzGO:001517 | neutral am   | 3/690  | 34/23049  | 0.080642 | 0.38224 | 0.36011 | Slc1a4/Slc1 |
| GO_MF_mzGO:00165C | protein-ho   | 2/690  | 16/23049  | 0.08143  | 0.38224 | 0.36011 | Lgr6/Tshr   |
| GO_MF_mzGO:00426C | T cell recep | 2/690  | 16/23049  | 0.08143  | 0.38224 | 0.36011 | H2-Q10/Lc   |
| GO_MF_mzGO:00153C | primary act  | 7/690  | 125/23049 | 0.081897 | 0.38224 | 0.36011 | Abcb1b/Ak   |
| GO_MF_mzGO:00048C | triglyceride | 3/690  | 35/23049  | 0.086329 | 0.38224 | 0.36011 | Ces2h/Lipc  |
| GO_MF_mzGO:000531 | dicarboxyli  | 3/690  | 35/23049  | 0.086329 | 0.38224 | 0.36011 | Folr1/Slc17 |
| GO_MF_mzGO:000004 | tRNA bindi   | 4/690  | 56/23049  | 0.086478 | 0.38224 | 0.36011 | Ears2/Fars2 |
| GO_MF_mzGO:001627 | lysine N-m   | 4/690  | 56/23049  | 0.086478 | 0.38224 | 0.36011 | Camkmt/D    |
| GO_MF_mzGO:001627 | protein-lys  | 4/690  | 56/23049  | 0.086478 | 0.38224 | 0.36011 | Camkmt/D    |
| GO_MF_mzGO:000104 | RNA polyr    | 1/690  | 3/23049   | 0.087151 | 0.38224 | 0.36011 | ErbB2       |
| GO_MF_mzGO:00039E | acetyl-CoA   | 1/690  | 3/23049   | 0.087151 | 0.38224 | 0.36011 | Nudt7       |
| GO_MF_mzGO:000452 | ribonuclea   | 1/690  | 3/23049   | 0.087151 | 0.38224 | 0.36011 | Rnase1      |
| GO_MF_mzGO:000474 | [pyruvate c  | 1/690  | 3/23049   | 0.087151 | 0.38224 | 0.36011 | Pdpr        |
| GO_MF_mzGO:000474 | ribonucleo   | 1/690  | 3/23049   | 0.087151 | 0.38224 | 0.36011 | Rrm1        |
| GO_MF_mzGO:00048C | tRNA (guar   | 1/690  | 3/23049   | 0.087151 | 0.38224 | 0.36011 | Trmt11      |
| GO_MF_mzGO:00051E | macrophag    | 1/690  | 3/23049   | 0.087151 | 0.38224 | 0.36011 | Il34        |
| GO_MF_mzGO:000534 | purine nucl  | 1/690  | 3/23049   | 0.087151 | 0.38224 | 0.36011 | Aqp9        |
| GO_MF_mzGO:00053E | pyrimidine   | 1/690  | 3/23049   | 0.087151 | 0.38224 | 0.36011 | Aqp9        |
| GO_MF_mzGO:000551 | cytoskeleta  | 1/690  | 3/23049   | 0.087151 | 0.38224 | 0.36011 | Ctnnb2      |
| GO_MF_mzGO:00081C | galactoside  | 1/690  | 3/23049   | 0.087151 | 0.38224 | 0.36011 | Fut1        |
| GO_MF_mzGO:000832 | Ral guanyl-  | 1/690  | 3/23049   | 0.087151 | 0.38224 | 0.36011 | Ralgs1      |
| GO_MF_mzGO:00085E | oxidized pt  | 1/690  | 3/23049   | 0.087151 | 0.38224 | 0.36011 | Rps3        |
| GO_MF_mzGO:00152C | nucleobase   | 1/690  | 3/23049   | 0.087151 | 0.38224 | 0.36011 | Aqp9        |
| GO_MF_mzGO:00152E | glycerol ch  | 1/690  | 3/23049   | 0.087151 | 0.38224 | 0.36011 | Aqp9        |
| GO_MF_mzGO:00152E | urea chann   | 1/690  | 3/23049   | 0.087151 | 0.38224 | 0.36011 | Aqp9        |
| GO_MF_mzGO:00164E | rRNA (uridi  | 1/690  | 3/23049   | 0.087151 | 0.38224 | 0.36011 | Mrm2        |
| GO_MF_mzGO:001661 | hydroxypyr   | 1/690  | 3/23049   | 0.087151 | 0.38224 | 0.36011 | Grhpr       |
| GO_MF_mzGO:001672 | oxidoreduc   | 1/690  | 3/23049   | 0.087151 | 0.38224 | 0.36011 | Rrm1        |



|                                       |           |          |          |          |             |
|---------------------------------------|-----------|----------|----------|----------|-------------|
| GO_MF_mzGO:003015 protein xylc1/690   | 3/23049   | 0.087151 | 0.38224  | 0.36011  | Xylt2       |
| GO_MF_mzGO:003026 glyoxylate 1/690    | 3/23049   | 0.087151 | 0.38224  | 0.36011  | Grhpr       |
| GO_MF_mzGO:003054 acetylcholin 1/690  | 3/23049   | 0.087151 | 0.38224  | 0.36011  | Slurp1      |
| GO_MF_mzGO:003062 U4atac snR1/690     | 3/23049   | 0.087151 | 0.38224  | 0.36011  | Gemin5      |
| GO_MF_mzGO:003112 alpha-(1,2)1/690    | 3/23049   | 0.087151 | 0.38224  | 0.36011  | Fut1        |
| GO_MF_mzGO:003404 sterol-tran:1/690   | 3/23049   | 0.087151 | 0.38224  | 0.36011  | Abcg4       |
| GO_MF_mzGO:003498 Fc-gamma 1/690      | 3/23049   | 0.087151 | 0.38224  | 0.36011  | Lgals3      |
| GO_MF_mzGO:003818 bile acid re 1/690  | 3/23049   | 0.087151 | 0.38224  | 0.36011  | Vdr         |
| GO_MF_mzGO:004338 HLH doma 1/690      | 3/23049   | 0.087151 | 0.38224  | 0.36011  | Ube2i       |
| GO_MF_mzGO:004803 disaccharid 1/690   | 3/23049   | 0.087151 | 0.38224  | 0.36011  | Lgals3      |
| GO_MF_mzGO:005187 methotrexat 1/690   | 3/23049   | 0.087151 | 0.38224  | 0.36011  | Folr1       |
| GO_MF_mzGO:006173 ribonucleo:1/690    | 3/23049   | 0.087151 | 0.38224  | 0.36011  | Rrm1        |
| GO_MF_mzGO:007057 metallodip:1/690    | 3/23049   | 0.087151 | 0.38224  | 0.36011  | Dpep1       |
| GO_MF_mzGO:007064 vitamin D r 1/690   | 3/23049   | 0.087151 | 0.38224  | 0.36011  | Vdr         |
| GO_MF_mzGO:007069 type II activ 1/690 | 3/23049   | 0.087151 | 0.38224  | 0.36011  | Inhba       |
| GO_MF_mzGO:007153 RING-like z 1/690   | 3/23049   | 0.087151 | 0.38224  | 0.36011  | Ube2i       |
| GO_MF_mzGO:008605 voltage-ga 1/690    | 3/23049   | 0.087151 | 0.38224  | 0.36011  | Cacna1g     |
| GO_MF_mzGO:00971C supercoiled 1/690   | 3/23049   | 0.087151 | 0.38224  | 0.36011  | Rps3        |
| GO_MF_mzGO:190557 gangliosid: 1/690   | 3/23049   | 0.087151 | 0.38224  | 0.36011  | Rtn4r       |
| GO_MF_mzGO:000554 phospholip 17/690   | 396/23049 | 0.0885   | 0.386464 | 0.36409  | Apoa4/Ara   |
| GO_MF_mzGO:001508 sodium ion 8/690    | 153/23049 | 0.089479 | 0.389039 | 0.366516 | Atp1b4/Ca   |
| GO_MF_mzGO:003067 Rac guanyl 2/690    | 17/23049  | 0.090517 | 0.390159 | 0.367571 | Spata13/Ti  |
| GO_MF_mzGO:007049 oligosacch: 2/690   | 17/23049  | 0.090517 | 0.390159 | 0.367571 | Lgals3/Sell |
| GO_MF_mzGO:004205 histone me 4/690    | 57/23049  | 0.090919 | 0.390211 | 0.367619 | Dydc1/Prr   |
| GO_MF_mzGO:001677 phosphotr: 3/690    | 36/23049  | 0.09218  | 0.392256 | 0.369547 | Ak3/Nme5    |
| GO_MF_mzGO:004317 RNA polymr 3/690    | 36/23049  | 0.09218  | 0.392256 | 0.369547 | Erbp2/Recc  |
| GO_MF_mzGO:001988 protein kin 9/690   | 181/23049 | 0.094807 | 0.401723 | 0.378465 | Cnksr3/Du   |
| GO_MF_mzGO:014009 catalytic ac 9/690  | 183/23049 | 0.099737 | 0.419677 | 0.39538  | Brip1/Dnas  |
| GO_MF_mzGO:005118 cofactor tr: 2/690  | 18/23049  | 0.099883 | 0.419677 | 0.39538  | Flvcr2/Slc1 |
| GO_MF_mzGO:004349 ATPase act 7/690    | 132/23049 | 0.10191  | 0.422441 | 0.397984 | Abcb1b/Ak   |
| GO_MF_mzGO:001674 transferase 10/690  | 211/23049 | 0.103191 | 0.422441 | 0.397984 | Bhmt/Cam    |
| GO_MF_mzGO:004205 chemoattr: 3/690    | 38/23049  | 0.104355 | 0.422441 | 0.397984 | Defb33/De   |
| GO_MF_mzGO:000368 damaged [ 4/690     | 60/23049  | 0.104877 | 0.422441 | 0.397984 | Polb/Polk/I |
| GO_MF_mzGO:004257 phosphoric 15/690   | 351/23049 | 0.107575 | 0.422441 | 0.397984 | Alpl2/Du    |
| GO_MF_mzGO:001679 hydrolase : 7/690   | 134/23049 | 0.108076 | 0.422441 | 0.397984 | Ctbs/Hpse:  |
| GO_MF_mzGO:00054C carbohydr: 2/690    | 19/23049  | 0.109504 | 0.422441 | 0.397984 | Gm5134/Sl   |
| GO_MF_mzGO:001689 endonucle: 2/690    | 19/23049  | 0.109504 | 0.422441 | 0.397984 | Dnase2b/R   |
| GO_MF_mzGO:001712 cholesterol 2/690   | 19/23049  | 0.109504 | 0.422441 | 0.397984 | Abcg4/Apc   |
| GO_MF_mzGO:00012C transcriptic 3/690  | 39/23049  | 0.110667 | 0.422441 | 0.397984 | Nfatc1/Rel  |
| GO_MF_mzGO:000554 phosphatic 3/690    | 39/23049  | 0.110667 | 0.422441 | 0.397984 | Arap2/Kif1  |
| GO_MF_mzGO:004288 amide tran 3/690    | 39/23049  | 0.110667 | 0.422441 | 0.397984 | Aqp9/Folr1  |
| GO_MF_mzGO:004339 proteoglyc 3/690    | 39/23049  | 0.110667 | 0.422441 | 0.397984 | Fst/Hpse2/  |
| GO_MF_mzGO:005187 Hsp90 prot 3/690    | 39/23049  | 0.110667 | 0.422441 | 0.397984 | Erbp2/Ppic  |
| GO_MF_mzGO:000827 protein me 5/690    | 85/23049  | 0.111425 | 0.422441 | 0.397984 | Camkmt/D    |
| GO_MF_mzGO:000391 DNA topoi: 1/690    | 4/23049   | 0.114481 | 0.422441 | 0.397984 | Gm960       |
| GO_MF_mzGO:000474 ribose pho: 1/690   | 4/23049   | 0.114481 | 0.422441 | 0.397984 | Prps2       |
| GO_MF_mzGO:000481 arginine-tF 1/690   | 4/23049   | 0.114481 | 0.422441 | 0.397984 | Dalrd3      |
| GO_MF_mzGO:000517 ErbB-2 clas 1/690   | 4/23049   | 0.114481 | 0.422441 | 0.397984 | Muc4        |

|                                       |           |          |          |          |             |
|---------------------------------------|-----------|----------|----------|----------|-------------|
| GO_MF_mzGO:000833protein tyrκ1/690    | 4/23049   | 0.114481 | 0.422441 | 0.397984 | Dusp10      |
| GO_MF_mzGO:001515L-glutamin1/690      | 4/23049   | 0.114481 | 0.422441 | 0.397984 | Slc38a1     |
| GO_MF_mzGO:001715tRNA dihyç1/690      | 4/23049   | 0.114481 | 0.422441 | 0.397984 | Dus2        |
| GO_MF_mzGO:003242purine-rich1/690     | 4/23049   | 0.114481 | 0.422441 | 0.397984 | Purb        |
| GO_MF_mzGO:00333Cdehydroasκ1/690      | 4/23049   | 0.114481 | 0.422441 | 0.397984 | Slc2a2      |
| GO_MF_mzGO:00337Esteroid def1/690     | 4/23049   | 0.114481 | 0.422441 | 0.397984 | Akr1d1      |
| GO_MF_mzGO:00340Eestrogen rκ1/690     | 4/23049   | 0.114481 | 0.422441 | 0.397984 | Esr2        |
| GO_MF_mzGO:003524protein-arç1/690     | 4/23049   | 0.114481 | 0.422441 | 0.397984 | Prmt9       |
| GO_MF_mzGO:00355Egangliosidκ1/690     | 4/23049   | 0.114481 | 0.422441 | 0.397984 | Rtn4r       |
| GO_MF_mzGO:00435Einositol 1,3 1/690   | 4/23049   | 0.114481 | 0.422441 | 0.397984 | Astn2       |
| GO_MF_mzGO:00550ED-glucose 1/690      | 4/23049   | 0.114481 | 0.422441 | 0.397984 | Slc2a2      |
| GO_MF_mzGO:00615C DNA topoi:1/690     | 4/23049   | 0.114481 | 0.422441 | 0.397984 | Gm960       |
| GO_MF_mzGO:00905E phosphatic 1/690    | 4/23049   | 0.114481 | 0.422441 | 0.397984 | Abcb4       |
| GO_MF_mzGO:00995E neurotrans 1/690    | 4/23049   | 0.114481 | 0.422441 | 0.397984 | Grm1        |
| GO_MF_mzGO:00150Ecalcium ior 7/690    | 137/23049 | 0.117688 | 0.432678 | 0.407628 | Cacna1b/C   |
| GO_MF_mzGO:00483ERac GTPasκ4/690      | 64/23049  | 0.12489  | 0.446187 | 0.420355 | Map3k11/5   |
| GO_MF_mzGO:00040Ealditol:NAE 2/690    | 21/23049  | 0.129417 | 0.446187 | 0.420355 | Akr1d1/Ak   |
| GO_MF_mzGO:004662sphingolipi 2/690    | 21/23049  | 0.129417 | 0.446187 | 0.420355 | Plekha8/Rt  |
| GO_MF_mzGO:000452endodeoxy 3/690      | 42/23049  | 0.130437 | 0.446187 | 0.420355 | Dnase1/Dn   |
| GO_MF_mzGO:00052Ecalcium ch:6/690     | 115/23049 | 0.131317 | 0.446187 | 0.420355 | Cacna1b/C   |
| GO_MF_mzGO:003097receptor ty 4/690    | 66/23049  | 0.135457 | 0.446187 | 0.420355 | Eif3a/Gas6, |
| GO_MF_mzGO:004362protein sell 4/690   | 66/23049  | 0.135457 | 0.446187 | 0.420355 | Aga/Bcl10/  |
| GO_MF_mzGO:00506ENADP bind 3/690      | 43/23049  | 0.137285 | 0.446187 | 0.420355 | Decr1/Fmc   |
| GO_MF_mzGO:00009Etranscriptic 2/690   | 22/23049  | 0.139666 | 0.446187 | 0.420355 | Max/Rela    |
| GO_MF_mzGO:00305C ankyrin bin 2/690   | 22/23049  | 0.139666 | 0.446187 | 0.420355 | Kctd6/Slc8: |
| GO_MF_mzGO:009007translation 2/690    | 22/23049  | 0.139666 | 0.446187 | 0.420355 | Mif4gd/Pui  |
| GO_MF_mzGO:00904E vitamin tra: 2/690  | 22/23049  | 0.139666 | 0.446187 | 0.420355 | Folr1/Slc2a |
| GO_MF_mzGO:00009E RNA polyr 4/690     | 67/23049  | 0.140872 | 0.446187 | 0.420355 | Atf6b/Nfat: |
| GO_MF_mzGO:00007C oxidized bκ 1/690   | 5/23049   | 0.140995 | 0.446187 | 0.420355 | Rps3        |
| GO_MF_mzGO:000122 RNA polyr 1/690     | 5/23049   | 0.140995 | 0.446187 | 0.420355 | Nfatc1      |
| GO_MF_mzGO:00040E aldehyde o 1/690    | 5/23049   | 0.140995 | 0.446187 | 0.420355 | Aox3        |
| GO_MF_mzGO:000404 aminoacyl- 1/690    | 5/23049   | 0.140995 | 0.446187 | 0.420355 | Ptrhd1      |
| GO_MF_mzGO:00047C JUN kinase 1/690    | 5/23049   | 0.140995 | 0.446187 | 0.420355 | Map3k11     |
| GO_MF_mzGO:000482 phenylalan 1/690    | 5/23049   | 0.140995 | 0.446187 | 0.420355 | Fars2       |
| GO_MF_mzGO:00048E xanthine dκ 1/690   | 5/23049   | 0.140995 | 0.446187 | 0.420355 | Aox3        |
| GO_MF_mzGO:000492 interleukin· 1/690  | 5/23049   | 0.140995 | 0.446187 | 0.420355 | lfngr2      |
| GO_MF_mzGO:00049E somatostat 1/690    | 5/23049   | 0.140995 | 0.446187 | 0.420355 | Sstr5       |
| GO_MF_mzGO:00051C type 1 fibrκ 1/690  | 5/23049   | 0.140995 | 0.446187 | 0.420355 | Fgf17       |
| GO_MF_mzGO:000511 type 2 fibrκ 1/690  | 5/23049   | 0.140995 | 0.446187 | 0.420355 | Fgf17       |
| GO_MF_mzGO:000851 folic acid tr 1/690 | 5/23049   | 0.140995 | 0.446187 | 0.420355 | Folr1       |
| GO_MF_mzGO:000937 four-way jt 1/690   | 5/23049   | 0.140995 | 0.446187 | 0.420355 | Recql5      |
| GO_MF_mzGO:00151E polyol tran: 1/690  | 5/23049   | 0.140995 | 0.446187 | 0.420355 | Aqp9        |
| GO_MF_mzGO:00151E glycerol tra 1/690  | 5/23049   | 0.140995 | 0.446187 | 0.420355 | Aqp9        |
| GO_MF_mzGO:00152C urea transr 1/690   | 5/23049   | 0.140995 | 0.446187 | 0.420355 | Aqp9        |
| GO_MF_mzGO:001617 NAD(P)H o 1/690     | 5/23049   | 0.140995 | 0.446187 | 0.420355 | Duox2       |
| GO_MF_mzGO:001662 oxidoreduc 1/690    | 5/23049   | 0.140995 | 0.446187 | 0.420355 | Aox3        |
| GO_MF_mzGO:001672 oxidoreduc 1/690    | 5/23049   | 0.140995 | 0.446187 | 0.420355 | Aox3        |
| GO_MF_mzGO:001677 diphospho 1/690     | 5/23049   | 0.140995 | 0.446187 | 0.420355 | Prps2       |

|                                    |           |          |          |          |             |
|------------------------------------|-----------|----------|----------|----------|-------------|
| GO_MF_mzGO:00302εestrogen rε1/690  | 5/23049   | 0.140995 | 0.446187 | 0.420355 | Esr2        |
| GO_MF_mzGO:003062U4 snRNA 1/690    | 5/23049   | 0.140995 | 0.446187 | 0.420355 | Gemin5      |
| GO_MF_mzGO:003404lipid-transr1/690 | 5/23049   | 0.140995 | 0.446187 | 0.420355 | Abcg4       |
| GO_MF_mzGO:003524protein-arç1/690  | 5/23049   | 0.140995 | 0.446187 | 0.420355 | Prmt9       |
| GO_MF_mzGO:003567enone red1/690    | 5/23049   | 0.140995 | 0.446187 | 0.420355 | Akr1d1      |
| GO_MF_mzGO:00443εsmall prote1/690  | 5/23049   | 0.140995 | 0.446187 | 0.420355 | Ube2i       |
| GO_MF_mzGO:004697histone me1/690   | 5/23049   | 0.140995 | 0.446187 | 0.420355 | Smyd2       |
| GO_MF_mzGO:00484C brain-deriv1/690 | 5/23049   | 0.140995 | 0.446187 | 0.420355 | Pzp         |
| GO_MF_mzGO:005152NFAT protε1/690   | 5/23049   | 0.140995 | 0.446187 | 0.420355 | Mapk14      |
| GO_MF_mzGO:006022phosphatic1/690   | 5/23049   | 0.140995 | 0.446187 | 0.420355 | Apoa4       |
| GO_MF_mzGO:00860C voltage-ga1/690  | 5/23049   | 0.140995 | 0.446187 | 0.420355 | Cacna1g     |
| GO_MF_mzGO:00084C 3'-5' exont3/690 | 44/23049  | 0.144253 | 0.452203 | 0.426023 | Cnot6/Eri2  |
| GO_MF_mzGO:001802 histone-lys3/690 | 44/23049  | 0.144253 | 0.452203 | 0.426023 | Dydc1/Setc  |
| GO_MF_mzGO:00426C peptide an3/690  | 44/23049  | 0.144253 | 0.452203 | 0.426023 | H2-M10.1/   |
| GO_MF_mzGO:00011εenhancer s5/690   | 93/23049  | 0.146573 | 0.45804  | 0.431522 | Atf6b/Gata  |
| GO_MF_mzGO:001662oxidoreduc2/690   | 23/23049  | 0.150081 | 0.459273 | 0.432683 | Akr1d1/De   |
| GO_MF_mzGO:000451nuclease ar9/690  | 201/23049 | 0.150474 | 0.459273 | 0.432683 | Ang6/Cnot   |
| GO_MF_mzGO:00199C phosphata:9/690  | 203/23049 | 0.156787 | 0.459273 | 0.432683 | Cacna1b/E   |
| GO_MF_mzGO:000524voltage-ga2/690   | 24/23049  | 0.160645 | 0.459273 | 0.432683 | Cacna1g/C   |
| GO_MF_mzGO:004332phosphatic2/690   | 24/23049  | 0.160645 | 0.459273 | 0.432683 | Kif16b/Phlc |
| GO_MF_mzGO:004262ATPase act15/690  | 377/23049 | 0.162533 | 0.459273 | 0.432683 | Abcb1b/Ak   |
| GO_MF_mzGO:00081εneuropepti3/690   | 47/23049  | 0.165816 | 0.459273 | 0.432683 | Npffr2/Pro  |
| GO_MF_mzGO:00314εnucleosom3/690    | 47/23049  | 0.165816 | 0.459273 | 0.432683 | Hp1bp3/Sr   |
| GO_MF_mzGO:00451εtranslation 3/690 | 47/23049  | 0.165816 | 0.459273 | 0.432683 | Mif4gd/Ne   |
| GO_MF_mzGO:190161organic hyc3/690  | 47/23049  | 0.165816 | 0.459273 | 0.432683 | Abcg4/Aqç   |
| GO_MF_mzGO:00016C pancreatic 1/690 | 6/23049   | 0.166716 | 0.459273 | 0.432683 | Prokr1      |
| GO_MF_mzGO:00039εNAD(P)+ -ç1/690   | 6/23049   | 0.166716 | 0.459273 | 0.432683 | Art4        |
| GO_MF_mzGO:00040εalkaline ph1/690  | 6/23049   | 0.166716 | 0.459273 | 0.432683 | Alpl2       |
| GO_MF_mzGO:000432ferroxidase1/690  | 6/23049   | 0.166716 | 0.459273 | 0.432683 | Heph        |
| GO_MF_mzGO:00044εlysine N-ac1/690  | 6/23049   | 0.166716 | 0.459273 | 0.432683 | Nat8f1      |
| GO_MF_mzGO:000471ribosomal j1/690  | 6/23049   | 0.166716 | 0.459273 | 0.432683 | Rps6ka1     |
| GO_MF_mzGO:00047εpyruvate d1/690   | 6/23049   | 0.166716 | 0.459273 | 0.432683 | Pdhx        |
| GO_MF_mzGO:00051εneurotropt1/690   | 6/23049   | 0.166716 | 0.459273 | 0.432683 | Grb2        |
| GO_MF_mzGO:000531high-affinit1/690 | 6/23049   | 0.166716 | 0.459273 | 0.432683 | Slc1a6      |
| GO_MF_mzGO:00054εcalcium:soc1/690  | 6/23049   | 0.166716 | 0.459273 | 0.432683 | Slc8a1      |
| GO_MF_mzGO:00054εvitamin D k1/690  | 6/23049   | 0.166716 | 0.459273 | 0.432683 | Vdr         |
| GO_MF_mzGO:00055εgalactose k1/690  | 6/23049   | 0.166716 | 0.459273 | 0.432683 | Mbl2        |
| GO_MF_mzGO:000817S-methyltr1/690   | 6/23049   | 0.166716 | 0.459273 | 0.432683 | Bhmt        |
| GO_MF_mzGO:000897phosphatic1/690   | 6/23049   | 0.166716 | 0.459273 | 0.432683 | Lipc        |
| GO_MF_mzGO:00150εferrous iror1/690 | 6/23049   | 0.166716 | 0.459273 | 0.432683 | Slc25a37    |
| GO_MF_mzGO:00152εheme trans1/690   | 6/23049   | 0.166716 | 0.459273 | 0.432683 | Flvcr2      |
| GO_MF_mzGO:00155C glutamate::1/690 | 6/23049   | 0.166716 | 0.459273 | 0.432683 | Slc1a6      |
| GO_MF_mzGO:001601cyclosporir1/690  | 6/23049   | 0.166716 | 0.459273 | 0.432683 | Ppid        |
| GO_MF_mzGO:001672oxidoreduc1/690   | 6/23049   | 0.166716 | 0.459273 | 0.432683 | Heph        |
| GO_MF_mzGO:00198εIgE bindingç1/690 | 6/23049   | 0.166716 | 0.459273 | 0.432683 | Lgals3      |
| GO_MF_mzGO:00336εoxidoreduc1/690   | 6/23049   | 0.166716 | 0.459273 | 0.432683 | Cyp1a2      |
| GO_MF_mzGO:00346C pyruvate d1/690  | 6/23049   | 0.166716 | 0.459273 | 0.432683 | Pdhx        |
| GO_MF_mzGO:00346C pyruvate d1/690  | 6/23049   | 0.166716 | 0.459273 | 0.432683 | Pdhx        |

|                    |                              |           |          |          |          |             |
|--------------------|------------------------------|-----------|----------|----------|----------|-------------|
| GO_MF_mzGO:003487  | caffeine ox 1/690            | 6/23049   | 0.166716 | 0.459273 | 0.432683 | Cyp1a2      |
| GO_MF_mzGO:003536  | selenocyste 1/690            | 6/23049   | 0.166716 | 0.459273 | 0.432683 | Rpl30       |
| GO_MF_mzGO:003537  | chondroitin 1/690            | 6/23049   | 0.166716 | 0.459273 | 0.432683 | Rtn4r       |
| GO_MF_mzGO:004318  | vascular en 1/690            | 6/23049   | 0.166716 | 0.459273 | 0.432683 | Pdcl3       |
| GO_MF_mzGO:004351  | kinetochore 1/690            | 6/23049   | 0.166716 | 0.459273 | 0.432683 | Spdl1       |
| GO_MF_mzGO:004739  | alkylglycerol 1/690          | 6/23049   | 0.166716 | 0.459273 | 0.432683 | Gdgd1       |
| GO_MF_mzGO:004763  | ADP-ribosyl 1/690            | 6/23049   | 0.166716 | 0.459273 | 0.432683 | Nudt5       |
| GO_MF_mzGO:007153  | ankyrin repeat 1/690         | 6/23049   | 0.166716 | 0.459273 | 0.432683 | Rela        |
| GO_MF_mzGO:012001  | intermembrane 1/690          | 6/23049   | 0.166716 | 0.459273 | 0.432683 | Plekha8     |
| GO_MF_mzGO:199023  | steroid hormone 1/690        | 6/23049   | 0.166716 | 0.459273 | 0.432683 | Esr2        |
| GO_MF_mzGO:001990  | protein phosphatase 7/690    | 151/23049 | 0.167998 | 0.461078 | 0.434384 | Cacna1b/E   |
| GO_MF_mzGO:001629  | lipase active 6/690          | 124/23049 | 0.168293 | 0.461078 | 0.434384 | Abhd4/Ces   |
| GO_MF_mzGO:0000173 | '-5'-exonuclease 2/690       | 25/23049  | 0.171338 | 0.466862 | 0.439833 | Cnot6/Eri2  |
| GO_MF_mzGO:008002  | phosphatidyl 2/690           | 25/23049  | 0.171338 | 0.466862 | 0.439833 | Kif16b/Phlc |
| GO_MF_mzGO:000804  | enzyme active 17/690         | 441/23049 | 0.174072 | 0.473021 | 0.445635 | Agap3/Agf   |
| GO_MF_mzGO:000486  | cysteine-tyrosine 4/690      | 73/23049  | 0.175053 | 0.474398 | 0.446932 | Dpep1/Gas   |
| GO_MF_mzGO:000422  | metalloenzyme 5/690          | 99/23049  | 0.175643 | 0.474712 | 0.447228 | Adam19/A    |
| GO_MF_mzGO:003143  | mitogen-activated 4/690      | 74/23049  | 0.181006 | 0.483827 | 0.455816 | Erbp2/Ma    |
| GO_MF_mzGO:000515  | insulin receptor 2/690       | 26/23049  | 0.182144 | 0.483827 | 0.455816 | Irs2/Slc2a2 |
| GO_MF_mzGO:002283  | substrate-specific 16/690    | 415/23049 | 0.182781 | 0.483827 | 0.455816 | Aqp12/Aqp   |
| GO_MF_mzGO:190198  | phosphatidyl 7/690           | 155/23049 | 0.183883 | 0.483827 | 0.455816 | Arap2/Kif1  |
| GO_MF_mzGO:000203  | p53 binding 4/690            | 75/23049  | 0.187026 | 0.483827 | 0.455816 | Gata1/Smy   |
| GO_MF_mzGO:001920  | kinase active 4/690          | 75/23049  | 0.187026 | 0.483827 | 0.455816 | Bcl10/Gas6  |
| GO_MF_mzGO:000852  | G-protein coupled 6/690      | 129/23049 | 0.190525 | 0.483827 | 0.455816 | Ackr2/Hcrt  |
| GO_MF_mzGO:000471  | signal transducer 1/690      | 7/23049   | 0.191668 | 0.483827 | 0.455816 | Erbp2       |
| GO_MF_mzGO:000847  | queuine tRNA 1/690           | 7/23049   | 0.191668 | 0.483827 | 0.455816 | Pdcl3       |
| GO_MF_mzGO:001518  | L-alanine tRNA 1/690         | 7/23049   | 0.191668 | 0.483827 | 0.455816 | Slc1a4      |
| GO_MF_mzGO:001524  | fatty acid transporter 1/690 | 7/23049   | 0.191668 | 0.483827 | 0.455816 | Abcc4       |
| GO_MF_mzGO:001717  | phosphatidyl 1/690           | 7/23049   | 0.191668 | 0.483827 | 0.455816 | Pigp        |
| GO_MF_mzGO:001987  | potassium channel 1/690      | 7/23049   | 0.191668 | 0.483827 | 0.455816 | Nedd4l      |
| GO_MF_mzGO:001987  | sodium channel 1/690         | 7/23049   | 0.191668 | 0.483827 | 0.455816 | Nedd4l      |
| GO_MF_mzGO:002285  | alanine transporter 1/690    | 7/23049   | 0.191668 | 0.483827 | 0.455816 | Slc1a4      |
| GO_MF_mzGO:003015  | molybdenum 1/690             | 7/23049   | 0.191668 | 0.483827 | 0.455816 | Aox3        |
| GO_MF_mzGO:003027  | LIM domain 1/690             | 7/23049   | 0.191668 | 0.483827 | 0.455816 | Ldb2        |
| GO_MF_mzGO:003055  | acetylcholine 1/690          | 7/23049   | 0.191668 | 0.483827 | 0.455816 | Ly6g6d      |
| GO_MF_mzGO:003471  | inhibin binding 1/690        | 7/23049   | 0.191668 | 0.483827 | 0.455816 | Inhba       |
| GO_MF_mzGO:003525  | UDP-xylose 1/690             | 7/23049   | 0.191668 | 0.483827 | 0.455816 | Xylt2       |
| GO_MF_mzGO:004260  | CD4 receptor 1/690           | 7/23049   | 0.191668 | 0.483827 | 0.455816 | Lck         |
| GO_MF_mzGO:007069  | activin receptor 1/690       | 7/23049   | 0.191668 | 0.483827 | 0.455816 | Inhba       |
| GO_MF_mzGO:007234  | NAADP-sensitive 1/690        | 7/23049   | 0.191668 | 0.483827 | 0.455816 | Tpcn2       |
| GO_MF_mzGO:199024  | N6-methyl 1/690              | 7/23049   | 0.191668 | 0.483827 | 0.455816 | Ythdc2      |
| GO_MF_mzGO:001688  | ATPase active 17/690         | 449/23049 | 0.19269  | 0.483827 | 0.455816 | Abcb1b/Ak   |
| GO_MF_mzGO:000388  | DNA-directed 2/690           | 27/23049  | 0.193047 | 0.483827 | 0.455816 | Polb/Polk   |
| GO_MF_mzGO:000810  | alcohol dehydrogenase 2/690  | 27/23049  | 0.193047 | 0.483827 | 0.455816 | Akr1d1/Ak   |
| GO_MF_mzGO:001689  | exoribonuclease 2/690        | 27/23049  | 0.193047 | 0.483827 | 0.455816 | Cnot6/Eri2  |
| GO_MF_mzGO:007188  | 14-3-3 protein 2/690         | 27/23049  | 0.193047 | 0.483827 | 0.455816 | Irs2/Zfp36l |
| GO_MF_mzGO:000451  | endonuclease 6/690           | 130/23049 | 0.195102 | 0.487754 | 0.459516 | Ang6/Dnas   |
| GO_MF_mzGO:000524  | voltage-gated 8/690          | 187/23049 | 0.19931  | 0.495796 | 0.467092 | Cacna1b/C   |

|                               |        |           |          |          |          |             |
|-------------------------------|--------|-----------|----------|----------|----------|-------------|
| GO_MF_mzGO:002283voltage-ga   | 8/690  | 187/23049 | 0.19931  | 0.495796 | 0.467092 | Cacna1b/C   |
| GO_MF_mzGO:003532enhancer     | 5/690  | 104/23049 | 0.201391 | 0.499731 | 0.470799 | Atf6b/Gata  |
| GO_MF_mzGO:001683hydro-lyas   | 3/690  | 52/23049  | 0.203614 | 0.49997  | 0.471024 | Car2/Car4/  |
| GO_MF_mzGO:000453exoribonuc   | 2/690  | 28/23049  | 0.204031 | 0.49997  | 0.471024 | Cnot6/Eri2  |
| GO_MF_mzGO:001543cation:catic | 2/690  | 28/23049  | 0.204031 | 0.49997  | 0.471024 | Slc8a1/Slc9 |
| GO_MF_mzGO:001677nucleotidyl  | 6/690  | 132/23049 | 0.204377 | 0.49997  | 0.471024 | Nudt5/Oas   |
| GO_MF_mzGO:004432ion channe   | 6/690  | 132/23049 | 0.204377 | 0.49997  | 0.471024 | Cabp4/Cba   |
| GO_MF_mzGO:000509GTPase act   | 10/690 | 246/23049 | 0.204488 | 0.49997  | 0.471024 | Agap3/Agf   |
| GO_MF_mzGO:001523secondary    | 10/690 | 247/23049 | 0.207868 | 0.502032 | 0.472967 | Gm5134/SI   |
| GO_MF_mzGO:000165peptide rec  | 6/690  | 133/23049 | 0.209073 | 0.502032 | 0.472967 | Ackr2/Hcrt  |
| GO_MF_mzGO:000809DNA-depe     | 4/690  | 79/23049  | 0.211714 | 0.502032 | 0.472967 | Brip1/Gm9   |
| GO_MF_mzGO:000817tRNA meth    | 2/690  | 29/23049  | 0.215081 | 0.502032 | 0.472967 | Trmt11/Wc   |
| GO_MF_mzGO:003051snoRNA bi    | 2/690  | 29/23049  | 0.215081 | 0.502032 | 0.472967 | Nudt5/Nuc   |
| GO_MF_mzGO:007253divalent inc | 2/690  | 29/23049  | 0.215081 | 0.502032 | 0.472967 | Slc25a37/S  |
| GO_MF_mzGO:000122transcripti  | 16/690 | 428/23049 | 0.215388 | 0.502032 | 0.472967 | Atf6b/Ddit  |
| GO_MF_mzGO:000391DNA topoi    | 1/690  | 8/23049   | 0.215874 | 0.502032 | 0.472967 | Gm960       |
| GO_MF_mzGO:000406arylesteras  | 1/690  | 8/23049   | 0.215874 | 0.502032 | 0.472967 | Car2        |
| GO_MF_mzGO:000443N,N-dimet    | 1/690  | 8/23049   | 0.215874 | 0.502032 | 0.472967 | Fmo5        |
| GO_MF_mzGO:000852phosphatic   | 1/690  | 8/23049   | 0.215874 | 0.502032 | 0.472967 | Tnfaip8I3   |
| GO_MF_mzGO:001519L-proline t  | 1/690  | 8/23049   | 0.215874 | 0.502032 | 0.472967 | Slc1a4      |
| GO_MF_mzGO:001683endoribont   | 1/690  | 8/23049   | 0.215874 | 0.502032 | 0.472967 | Rnase1      |
| GO_MF_mzGO:001715sodium:dic   | 1/690  | 8/23049   | 0.215874 | 0.502032 | 0.472967 | Slc1a6      |
| GO_MF_mzGO:003061U1 snRNA     | 1/690  | 8/23049   | 0.215874 | 0.502032 | 0.472967 | Gemin5      |
| GO_MF_mzGO:003524protein-ar   | 1/690  | 8/23049   | 0.215874 | 0.502032 | 0.472967 | Prmt9       |
| GO_MF_mzGO:003631annealing l  | 1/690  | 8/23049   | 0.215874 | 0.502032 | 0.472967 | Smarca1     |
| GO_MF_mzGO:004314ATP-deper    | 1/690  | 8/23049   | 0.215874 | 0.502032 | 0.472967 | Recql5      |
| GO_MF_mzGO:007003delta-cater  | 1/690  | 8/23049   | 0.215874 | 0.502032 | 0.472967 | Cdh24       |
| GO_MF_mzGO:007018small ribos  | 1/690  | 8/23049   | 0.215874 | 0.502032 | 0.472967 | Rps3        |
| GO_MF_mzGO:199044U1 snRNP l   | 1/690  | 8/23049   | 0.215874 | 0.502032 | 0.472967 | Snrpc       |
| GO_MF_mzGO:000373transcripti  | 5/690  | 107/23049 | 0.217417 | 0.502118 | 0.473048 | Nfatc1/Rel  |
| GO_MF_mzGO:000454ribonuclea   | 5/690  | 107/23049 | 0.217417 | 0.502118 | 0.473048 | Ang6/Cnot   |
| GO_MF_mzGO:000455hydrolase    | 5/690  | 107/23049 | 0.217417 | 0.502118 | 0.473048 | Ctbs/Lyzl1/ |
| GO_MF_mzGO:000473MAP kinas    | 4/690  | 80/23049  | 0.218025 | 0.502362 | 0.473278 | Erbp2/Map   |
| GO_MF_mzGO:001507monovalen    | 14/690 | 369/23049 | 0.218723 | 0.50281  | 0.4737   | Atp1b4/At   |
| GO_MF_mzGO:199078protein tyr  | 4/690  | 81/23049  | 0.224386 | 0.511444 | 0.481834 | Eif3a/Gas6  |
| GO_MF_mzGO:003321amide binc   | 13/690 | 341/23049 | 0.224519 | 0.511444 | 0.481834 | Folr1/H2-N  |
| GO_MF_mzGO:000403aldo-keto    | 12/690 | 30/23049  | 0.226183 | 0.511444 | 0.481834 | Akr1d1/Ak   |
| GO_MF_mzGO:000493G-protein    | 12/690 | 30/23049  | 0.226183 | 0.511444 | 0.481834 | Htr2c/Olfr4 |
| GO_MF_mzGO:000857ATP-deper    | 2/690  | 30/23049  | 0.226183 | 0.511444 | 0.481834 | Dynll2/Kif1 |
| GO_MF_mzGO:001523solute:catic | 2/690  | 30/23049  | 0.226183 | 0.511444 | 0.481834 | Slc8a1/Slc9 |
| GO_MF_mzGO:009958serotonin    | 2/690  | 30/23049  | 0.226183 | 0.511444 | 0.481834 | Htr2c/Olfr4 |
| GO_MF_mzGO:000802monocarbc    | 3/690  | 55/23049  | 0.227163 | 0.511444 | 0.481834 | Abcc4/Slc1  |
| GO_MF_mzGO:000553glycosamin   | 8/690  | 196/23049 | 0.234972 | 0.511444 | 0.481834 | Ager/Lipc/l |
| GO_MF_mzGO:000837acetylglucc  | 3/690  | 56/23049  | 0.235127 | 0.511444 | 0.481834 | B3gnt5/Pig  |
| GO_MF_mzGO:003506methylatec   | 3/690  | 56/23049  | 0.235127 | 0.511444 | 0.481834 | Cbx5/Cdyl2  |
| GO_MF_mzGO:014003methylatio   | 3/690  | 56/23049  | 0.235127 | 0.511444 | 0.481834 | Cbx5/Cdyl2  |
| GO_MF_mzGO:005066flavin aden  | 4/690  | 83/23049  | 0.237247 | 0.511444 | 0.481834 | Aox3/Coq6   |
| GO_MF_mzGO:000093RNA polym    | 2/690  | 31/23049  | 0.237325 | 0.511444 | 0.481834 | Recql5/Sm   |

|                                      |           |          |          |          |             |
|--------------------------------------|-----------|----------|----------|----------|-------------|
| GO_MF_mzGO:00040C ATP-deper 2/690    | 31/23049  | 0.237325 | 0.511444 | 0.481834 | Brip1/Recq  |
| GO_MF_mzGO:00082C ion channe 2/690   | 31/23049  | 0.237325 | 0.511444 | 0.481834 | Nedd4l/Va   |
| GO_MF_mzGO:001714Wnt-prote 2/690     | 31/23049  | 0.237325 | 0.511444 | 0.481834 | Ror2/Trabc  |
| GO_MF_mzGO:000401adenylate h 1/690   | 9/23049   | 0.239356 | 0.511444 | 0.481834 | Ak3         |
| GO_MF_mzGO:000457oligosacchi 1/690   | 9/23049   | 0.239356 | 0.511444 | 0.481834 | Stt3b       |
| GO_MF_mzGO:000457dolichyl-di 1/690   | 9/23049   | 0.239356 | 0.511444 | 0.481834 | Stt3b       |
| GO_MF_mzGO:000516neurotropt 1/690    | 9/23049   | 0.239356 | 0.511444 | 0.481834 | Grb2        |
| GO_MF_mzGO:000522volume-se 1/690     | 9/23049   | 0.239356 | 0.511444 | 0.481834 | Lrrc8c      |
| GO_MF_mzGO:000534ATP transr 1/690    | 9/23049   | 0.239356 | 0.511444 | 0.481834 | Slc25a25    |
| GO_MF_mzGO:000538iron ion tra 1/690  | 9/23049   | 0.239356 | 0.511444 | 0.481834 | Slc25a37    |
| GO_MF_mzGO:000823dipeptidyl- 1/690   | 9/23049   | 0.239356 | 0.511444 | 0.481834 | Dpep1       |
| GO_MF_mzGO:000846histone-arç 1/690   | 9/23049   | 0.239356 | 0.511444 | 0.481834 | Prmt9       |
| GO_MF_mzGO:000852phosphatic 1/690    | 9/23049   | 0.239356 | 0.511444 | 0.481834 | Abcb4       |
| GO_MF_mzGO:000853N-acetyllac 1/690   | 9/23049   | 0.239356 | 0.511444 | 0.481834 | B3gnt5      |
| GO_MF_mzGO:001986chloride ch 1/690   | 9/23049   | 0.239356 | 0.511444 | 0.481834 | Vamp8       |
| GO_MF_mzGO:003162opioid rece 1/690   | 9/23049   | 0.239356 | 0.511444 | 0.481834 | Npffr2      |
| GO_MF_mzGO:003235oxidized pt 1/690   | 9/23049   | 0.239356 | 0.511444 | 0.481834 | Rps3        |
| GO_MF_mzGO:004228xylosyltranç 1/690  | 9/23049   | 0.239356 | 0.511444 | 0.481834 | Xylt2       |
| GO_MF_mzGO:009898G-protein ç 1/690   | 9/23049   | 0.239356 | 0.511444 | 0.481834 | Grm1        |
| GO_MF_mzGO:00085C anion trans 12/690 | 316/23049 | 0.240073 | 0.511882 | 0.482247 | Abcc4/Folr  |
| GO_MF_mzGO:001662oxidoreduc 3/690    | 57/23049  | 0.243138 | 0.517316 | 0.487366 | Akr1d1/De   |
| GO_MF_mzGO:00991C ion channe 4/690   | 84/23049  | 0.243742 | 0.517498 | 0.487538 | Cabp4/Kcn   |
| GO_MF_mzGO:001526channel ac 16/690   | 439/23049 | 0.244853 | 0.51766  | 0.48769  | Aqp12/Aqp   |
| GO_MF_mzGO:00228C passive tra 16/690 | 439/23049 | 0.244853 | 0.51766  | 0.48769  | Aqp12/Aqp   |
| GO_MF_mzGO:000507SH3/SH2 a 2/690     | 32/23049  | 0.248495 | 0.521144 | 0.490972 | Grb2/Grb7   |
| GO_MF_mzGO:004476ATPase act 2/690    | 32/23049  | 0.248495 | 0.521144 | 0.490972 | Atp5c1/Atç  |
| GO_MF_mzGO:005108NF-kappaE 2/690     | 32/23049  | 0.248495 | 0.521144 | 0.490972 | Bcl10/Rela  |
| GO_MF_mzGO:003255purine ribo 13/690  | 349/23049 | 0.248966 | 0.521144 | 0.490972 | Agap3/Ak3   |
| GO_MF_mzGO:000462phospholiç 4/690    | 85/23049  | 0.250276 | 0.521144 | 0.490972 | Abhd4/Gdç   |
| GO_MF_mzGO:005084extracellula 3/690  | 58/23049  | 0.251193 | 0.521144 | 0.490972 | Eln/Lgals3/ |
| GO_MF_mzGO:004526cadherin bi 12/690  | 321/23049 | 0.25638  | 0.521144 | 0.490972 | Arhgap18/   |
| GO_MF_mzGO:001624channel inç 2/690   | 33/23049  | 0.25968  | 0.521144 | 0.490972 | Nedd4l/Va   |
| GO_MF_mzGO:005198dynein ligh 2/690   | 33/23049  | 0.25968  | 0.521144 | 0.490972 | Dynll2/Rilp |
| GO_MF_mzGO:00167C oxidoreduc 8/690   | 202/23049 | 0.259889 | 0.521144 | 0.490972 | Akr1d1/Co   |
| GO_MF_mzGO:000188purine nuc 13/690   | 353/23049 | 0.26155  | 0.521144 | 0.490972 | Agap3/Ak3   |
| GO_MF_mzGO:000823metallopeç 7/690    | 173/23049 | 0.262024 | 0.521144 | 0.490972 | Adam19/A    |
| GO_MF_mzGO:000034RNA 7-me 1/690      | 10/23049  | 0.262135 | 0.521144 | 0.490972 | Gemin5      |
| GO_MF_mzGO:000443phosphatic 1/690    | 10/23049  | 0.262135 | 0.521144 | 0.490972 | Mttr14      |
| GO_MF_mzGO:000456chitinase ar 1/690  | 10/23049  | 0.262135 | 0.521144 | 0.490972 | Ctbs        |
| GO_MF_mzGO:000498neuropepti 1/690    | 10/23049  | 0.262135 | 0.521144 | 0.490972 | Prokr1      |
| GO_MF_mzGO:000843translation 1/690   | 10/23049  | 0.262135 | 0.521144 | 0.490972 | Mif4gd      |
| GO_MF_mzGO:000865cysteine-ty 1/690   | 10/23049  | 0.262135 | 0.521144 | 0.490972 | Bcl10       |
| GO_MF_mzGO:001521ADP transn 1/690    | 10/23049  | 0.262135 | 0.521144 | 0.490972 | Slc25a25    |
| GO_MF_mzGO:001538potassium: 1/690    | 10/23049  | 0.262135 | 0.521144 | 0.490972 | Slc9a4      |
| GO_MF_mzGO:001688endodeoxy 1/690     | 10/23049  | 0.262135 | 0.521144 | 0.490972 | Dnase1      |
| GO_MF_mzGO:001995C-C chemç 1/690     | 10/23049  | 0.262135 | 0.521144 | 0.490972 | Ackr2       |
| GO_MF_mzGO:003193thioesteras 1/690   | 10/23049  | 0.262135 | 0.521144 | 0.490972 | Traf4       |
| GO_MF_mzGO:003235oxidized DI 1/690   | 10/23049  | 0.262135 | 0.521144 | 0.490972 | Rps3        |

|                                |         |           |          |          |          |             |
|--------------------------------|---------|-----------|----------|----------|----------|-------------|
| GO_MF_mzGO:004257lipid phosph  | 1/690   | 10/23049  | 0.262135 | 0.521144 | 0.490972 | Plppr3      |
| GO_MF_mzGO:00432C glycosphin   | 1/690   | 10/23049  | 0.262135 | 0.521144 | 0.490972 | Rtn4r       |
| GO_MF_mzGO:00470E ketosteroic  | 1/690   | 10/23049  | 0.262135 | 0.521144 | 0.490972 | Akr1d1      |
| GO_MF_mzGO:007051death dom     | 1/690   | 10/23049  | 0.262135 | 0.521144 | 0.490972 | Ripk1       |
| GO_MF_mzGO:00709E snRNP bind   | 1/690   | 10/23049  | 0.262135 | 0.521144 | 0.490972 | Snrpc       |
| GO_MF_mzGO:19904C protein ant  | 1/690   | 10/23049  | 0.262135 | 0.521144 | 0.490972 | Lck         |
| GO_MF_mzGO:003254ribonucleo    | 13/690  | 354/23049 | 0.264731 | 0.524437 | 0.494075 | Agap3/Ak3   |
| GO_MF_mzGO:00306E GTPase rec   | 10/690  | 263/23049 | 0.264841 | 0.524437 | 0.494075 | Agap3/Agf   |
| GO_MF_mzGO:000817RNA methy     | 3/690   | 60/23049  | 0.267413 | 0.526643 | 0.496153 | Mrm2/Trm    |
| GO_MF_mzGO:000107transcripti   | 11/690  | 294/23049 | 0.267663 | 0.526643 | 0.496153 | Ddit3/Esr2/ |
| GO_MF_mzGO:00082C heparin bir  | 6/690   | 145/23049 | 0.268061 | 0.526643 | 0.496153 | Ager/Lipc/l |
| GO_MF_mzGO:00708E growth fac   | 6/690   | 145/23049 | 0.268061 | 0.526643 | 0.496153 | Fgf17/Fgf4  |
| GO_MF_mzGO:000837galactosylti  | 2/690   | 34/23049  | 0.27087  | 0.531117 | 0.500368 | A4galt/B3c  |
| GO_MF_mzGO:000471transmemt     | 3/690   | 61/23049  | 0.275569 | 0.533272 | 0.502398 | Erbp2/Ret/  |
| GO_MF_mzGO:001671oxidoreduc    | 3/690   | 61/23049  | 0.275569 | 0.533272 | 0.502398 | Cyp1a2/Cy   |
| GO_MF_mzGO:00168E carbon-ox    | 3/690   | 61/23049  | 0.275569 | 0.533272 | 0.502398 | Car2/Car4/  |
| GO_MF_mzGO:004282histone de    | 5/690   | 118/23049 | 0.27908  | 0.533272 | 0.502398 | Cbx5/Rela/  |
| GO_MF_mzGO:00051E epidermal    | 12/690  | 35/23049  | 0.282054 | 0.533272 | 0.502398 | Grb2/Socs3  |
| GO_MF_mzGO:00045E deoxyribor   | 3/690   | 62/23049  | 0.283749 | 0.533272 | 0.502398 | Dnase1/Dn   |
| GO_MF_mzGO:00011E RNA polyn    | 1/690   | 11/23049  | 0.284234 | 0.533272 | 0.502398 | Vax2        |
| GO_MF_mzGO:00048E protein ser  | 1/690   | 11/23049  | 0.284234 | 0.533272 | 0.502398 | 4933415F2   |
| GO_MF_mzGO:00080E chitin bindi | 1/690   | 11/23049  | 0.284234 | 0.533272 | 0.502398 | Ctbs        |
| GO_MF_mzGO:000841fucosyltran   | 1/690   | 11/23049  | 0.284234 | 0.533272 | 0.502398 | Fut1        |
| GO_MF_mzGO:00153E calcium:cat  | 1/690   | 11/23049  | 0.284234 | 0.533272 | 0.502398 | Slc8a1      |
| GO_MF_mzGO:00153E sodium:prc   | 1/690   | 11/23049  | 0.284234 | 0.533272 | 0.502398 | Slc9a4      |
| GO_MF_mzGO:001627arginine N    | 1/690   | 11/23049  | 0.284234 | 0.533272 | 0.502398 | Prmt9       |
| GO_MF_mzGO:001627protein-ar    | 1/690   | 11/23049  | 0.284234 | 0.533272 | 0.502398 | Prmt9       |
| GO_MF_mzGO:00168E endodeoxy    | 1/690   | 11/23049  | 0.284234 | 0.533272 | 0.502398 | Dnase2b     |
| GO_MF_mzGO:00423C phosphate    | 1/690   | 11/23049  | 0.284234 | 0.533272 | 0.502398 | Rela        |
| GO_MF_mzGO:004352leucine zip   | 1/690   | 11/23049  | 0.284234 | 0.533272 | 0.502398 | Ddit3       |
| GO_MF_mzGO:00435E insulin rec  | 1/690   | 11/23049  | 0.284234 | 0.533272 | 0.502398 | Grb2        |
| GO_MF_mzGO:004697TAP bindin    | 1/690   | 11/23049  | 0.284234 | 0.533272 | 0.502398 | H2-Q10      |
| GO_MF_mzGO:004737acylglycerc   | 1/690   | 11/23049  | 0.284234 | 0.533272 | 0.502398 | Lipc        |
| GO_MF_mzGO:00481E activin bind | 1/690   | 11/23049  | 0.284234 | 0.533272 | 0.502398 | Fst         |
| GO_MF_mzGO:005274phosphatic    | 1/690   | 11/23049  | 0.284234 | 0.533272 | 0.502398 | Mtmt14      |
| GO_MF_mzGO:199082sequence-     | 1/690   | 11/23049  | 0.284234 | 0.533272 | 0.502398 | Srsf3       |
| GO_MF_mzGO:00605E nucleoside   | 11/690  | 301/23049 | 0.292677 | 0.538154 | 0.506998 | Agap3/Agf   |
| GO_MF_mzGO:00038E DNA-direc    | 2/690   | 36/23049  | 0.293223 | 0.538154 | 0.506998 | Polr1e/Polr |
| GO_MF_mzGO:00340E DNA polyn    | 2/690   | 36/23049  | 0.293223 | 0.538154 | 0.506998 | Polb/Polk   |
| GO_MF_mzGO:00018E nucleoside   | 13/690  | 364/23049 | 0.29723  | 0.538154 | 0.506998 | Agap3/Ak3   |
| GO_MF_mzGO:00050E signal trans | 6/690   | 151/23049 | 0.29899  | 0.538154 | 0.506998 | Erbp2/Map   |
| GO_MF_mzGO:001982cation-trar   | 3/690   | 64/23049  | 0.300166 | 0.538154 | 0.506998 | Atp1b4/At   |
| GO_MF_mzGO:00228E active ion   | t 3/690 | 64/23049  | 0.300166 | 0.538154 | 0.506998 | Atp1b4/At   |
| GO_MF_mzGO:004262ATPase cot    | 3/690   | 64/23049  | 0.300166 | 0.538154 | 0.506998 | Atp1b4/At   |
| GO_MF_mzGO:00325E guanyl ribc  | 13/690  | 366/23049 | 0.303867 | 0.538154 | 0.506998 | Agap3/Ak3   |
| GO_MF_mzGO:00170E sodium ch    | 2/690   | 37/23049  | 0.304368 | 0.538154 | 0.506998 | Fxyd6/Ned   |
| GO_MF_mzGO:00340E 5' -3' RNA   | 12/690  | 37/23049  | 0.304368 | 0.538154 | 0.506998 | Polr1e/Polr |
| GO_MF_mzGO:00435E ADP bindir   | 2/690   | 37/23049  | 0.304368 | 0.538154 | 0.506998 | Prkag1/Pr   |

|                                      |           |          |          |          |             |
|--------------------------------------|-----------|----------|----------|----------|-------------|
| GO_MF_mzGO:009774RNA polyr 2/690     | 37/23049  | 0.304368 | 0.538154 | 0.506998 | Polr1e/Polr |
| GO_MF_mzGO:000029adenine nu 1/690    | 12/23049  | 0.305671 | 0.538154 | 0.506998 | Slc25a25    |
| GO_MF_mzGO:00009C translation 1/690  | 12/23049  | 0.305671 | 0.538154 | 0.506998 | Purb        |
| GO_MF_mzGO:000105RNA polyr 1/690     | 12/23049  | 0.305671 | 0.538154 | 0.506998 | Polr1e      |
| GO_MF_mzGO:0001732'-5'-oligo 1/690   | 12/23049  | 0.305671 | 0.538154 | 0.506998 | Oas2        |
| GO_MF_mzGO:000216aminoacyl- 1/690    | 12/23049  | 0.305671 | 0.538154 | 0.506998 | Iars        |
| GO_MF_mzGO:000487compleme 1/690      | 12/23049  | 0.305671 | 0.538154 | 0.506998 | C3ar1       |
| GO_MF_mzGO:000534purine ribo 1/690   | 12/23049  | 0.305671 | 0.538154 | 0.506998 | Slc25a25    |
| GO_MF_mzGO:000539sodium:poi 1/690    | 12/23049  | 0.305671 | 0.538154 | 0.506998 | Atp1b4      |
| GO_MF_mzGO:000545monovalen 1/690     | 12/23049  | 0.305671 | 0.538154 | 0.506998 | Slc9a4      |
| GO_MF_mzGO:000833high volta 1/690    | 12/23049  | 0.305671 | 0.538154 | 0.506998 | Cacna1b     |
| GO_MF_mzGO:000855potassium- 1/690    | 12/23049  | 0.305671 | 0.538154 | 0.506998 | Atp1b4      |
| GO_MF_mzGO:001521purine nuc 1/690    | 12/23049  | 0.305671 | 0.538154 | 0.506998 | Slc25a25    |
| GO_MF_mzGO:00165C peptidase 1/690    | 12/23049  | 0.305671 | 0.538154 | 0.506998 | Bcl10       |
| GO_MF_mzGO:001716vinculin bir 1/690  | 12/23049  | 0.305671 | 0.538154 | 0.506998 | Ctnna1      |
| GO_MF_mzGO:003054receptor ac 1/690   | 12/23049  | 0.305671 | 0.538154 | 0.506998 | Slurp1      |
| GO_MF_mzGO:003088beta-2-mir 1/690    | 12/23049  | 0.305671 | 0.538154 | 0.506998 | H2-Q10      |
| GO_MF_mzGO:003549cAMP resp 1/690     | 12/23049  | 0.305671 | 0.538154 | 0.506998 | Atf6b       |
| GO_MF_mzGO:004302ribosomal 1/690     | 12/23049  | 0.305671 | 0.538154 | 0.506998 | Pim1        |
| GO_MF_mzGO:004454S100 prote 1/690    | 12/23049  | 0.305671 | 0.538154 | 0.506998 | Ager        |
| GO_MF_mzGO:00484C nerve grow 1/690   | 12/23049  | 0.305671 | 0.538154 | 0.506998 | Pzp         |
| GO_MF_mzGO:005066oxidoreduc 1/690    | 12/23049  | 0.305671 | 0.538154 | 0.506998 | Duox2       |
| GO_MF_mzGO:009749structural n 1/690  | 12/23049  | 0.305671 | 0.538154 | 0.506998 | Myom2       |
| GO_MF_mzGO:00190C guanyl nuc 13/690  | 367/23049 | 0.3072   | 0.539895 | 0.508638 | Agap3/Ak3   |
| GO_MF_mzGO:00047C signal trans 5/690 | 123/23049 | 0.308201 | 0.540704 | 0.5094   | ErbB2/Map   |
| GO_MF_mzGO:000471protein ser 2/690   | 38/23049  | 0.31548  | 0.550676 | 0.518795 | Aurka/Rps6  |
| GO_MF_mzGO:00167E transferase 10/690 | 277/23049 | 0.318267 | 0.550676 | 0.518795 | A4galt/Art  |
| GO_MF_mzGO:000097RNA polyr 16/690    | 466/23049 | 0.323029 | 0.550676 | 0.518795 | Atf6b/Ddit  |
| GO_MF_mzGO:003126small GTPa 15/690   | 435/23049 | 0.324602 | 0.550676 | 0.518795 | Agap3/Agf   |
| GO_MF_mzGO:00039C DNA-(apur 1/690    | 13/23049  | 0.326468 | 0.550676 | 0.518795 | Rps3        |
| GO_MF_mzGO:000453poly(A)-spe 1/690   | 13/23049  | 0.326468 | 0.550676 | 0.518795 | Cnot6       |
| GO_MF_mzGO:000517vascular en 1/690   | 13/23049  | 0.326468 | 0.550676 | 0.518795 | Pdcl3       |
| GO_MF_mzGO:000552tropomyos 1/690     | 13/23049  | 0.326468 | 0.550676 | 0.518795 | Tmod2       |
| GO_MF_mzGO:000554folic acid b 1/690  | 13/23049  | 0.326468 | 0.550676 | 0.518795 | Folr1       |
| GO_MF_mzGO:00083C DNA bindir 1/690   | 13/23049  | 0.326468 | 0.550676 | 0.518795 | Gata1       |
| GO_MF_mzGO:000847palmitoyl-( 1/690   | 13/23049  | 0.326468 | 0.550676 | 0.518795 | Abhd13      |
| GO_MF_mzGO:001564toxic subst 1/690   | 13/23049  | 0.326468 | 0.550676 | 0.518795 | A4galt      |
| GO_MF_mzGO:001592glucosidas 1/690    | 13/23049  | 0.326468 | 0.550676 | 0.518795 | Mogs        |
| GO_MF_mzGO:003592mRNA 3'-L 1/690     | 13/23049  | 0.326468 | 0.550676 | 0.518795 | Zfp3611     |
| GO_MF_mzGO:004529alpha-cate 1/690    | 13/23049  | 0.326468 | 0.550676 | 0.518795 | Cdh24       |
| GO_MF_mzGO:005137serotonin k 1/690   | 13/23049  | 0.326468 | 0.550676 | 0.518795 | Htr2c       |
| GO_MF_mzGO:007074C2H2 zinc 1/690     | 13/23049  | 0.326468 | 0.550676 | 0.518795 | Gata1       |
| GO_MF_mzGO:009761annealing 1/690     | 13/23049  | 0.326468 | 0.550676 | 0.518795 | Smarca1     |
| GO_MF_mzGO:009859palmitoyl h 1/690   | 13/23049  | 0.326468 | 0.550676 | 0.518795 | Abhd13      |
| GO_MF_mzGO:000178phosphoty 2/690     | 39/23049  | 0.326551 | 0.550676 | 0.518795 | Grb2/Lck    |
| GO_MF_mzGO:001548cholesterol 2/690   | 39/23049  | 0.326551 | 0.550676 | 0.518795 | Apoa4/Sta   |
| GO_MF_mzGO:003226phosphatic 2/690    | 39/23049  | 0.326551 | 0.550676 | 0.518795 | Kif16b/Phk  |
| GO_MF_mzGO:004691transition n 2/690  | 39/23049  | 0.326551 | 0.550676 | 0.518795 | Slc25a37/S  |



|                                     |           |          |          |          |            |
|-------------------------------------|-----------|----------|----------|----------|------------|
| GO_MF_mzGO:000485enzyme int14/690   | 405/23049 | 0.329327 | 0.554422 | 0.522324 | 4933415F2  |
| GO_MF_mzGO:001624channel re5/690    | 127/23049 | 0.331795 | 0.556704 | 0.524474 | Cabp4/Fxy  |
| GO_MF_mzGO:003067protein bin5/690   | 127/23049 | 0.331795 | 0.556704 | 0.524474 | Cbx5/Dsp/  |
| GO_MF_mzGO:000552GTP bindin12/690   | 344/23049 | 0.335661 | 0.562246 | 0.529695 | Agap3/Ak3  |
| GO_MF_mzGO:003245demethyla2/690     | 40/23049  | 0.337573 | 0.563811 | 0.531169 | Cyp1a2/Cy  |
| GO_MF_mzGO:001712SH3 domai5/690     | 128/23049 | 0.337722 | 0.563811 | 0.531169 | Adam19/C   |
| GO_MF_mzGO:000107transcriptic6/690  | 160/23049 | 0.346485 | 0.566409 | 0.533617 | Fezf1/Gata |
| GO_MF_mzGO:000033RNA cap b1/690     | 14/23049  | 0.346642 | 0.566409 | 0.533617 | Gemin5     |
| GO_MF_mzGO:000116intrinsic tra1/690 | 14/23049  | 0.346642 | 0.566409 | 0.533617 | Vax2       |
| GO_MF_mzGO:000528amino acid1/690    | 14/23049  | 0.346642 | 0.566409 | 0.533617 | Slc1a6     |
| GO_MF_mzGO:000552macrolide l1/690   | 14/23049  | 0.346642 | 0.566409 | 0.533617 | Ppid       |
| GO_MF_mzGO:000552FK506 bind1/690    | 14/23049  | 0.346642 | 0.566409 | 0.533617 | Ppid       |
| GO_MF_mzGO:000832protein tra1/690   | 14/23049  | 0.346642 | 0.566409 | 0.533617 | Tomm7      |
| GO_MF_mzGO:000843JUN kinase1/690    | 14/23049  | 0.346642 | 0.566409 | 0.533617 | Dusp10     |
| GO_MF_mzGO:001031phosphatic1/690    | 14/23049  | 0.346642 | 0.566409 | 0.533617 | Phlda3     |
| GO_MF_mzGO:001649C-C chemc1/690     | 14/23049  | 0.346642 | 0.566409 | 0.533617 | Ackr2      |
| GO_MF_mzGO:001910DNA N-gly1/690     | 14/23049  | 0.346642 | 0.566409 | 0.533617 | Rps3       |
| GO_MF_mzGO:0043133'-5' DNA l1/690   | 14/23049  | 0.346642 | 0.566409 | 0.533617 | Recql5     |
| GO_MF_mzGO:004529gamma-ca1/690      | 14/23049  | 0.346642 | 0.566409 | 0.533617 | Ctnna1     |
| GO_MF_mzGO:000452exonucleas3/690    | 70/23049  | 0.349565 | 0.566613 | 0.533809 | Cnot6/Eri2 |
| GO_MF_mzGO:000508Rho guany3/690     | 70/23049  | 0.349565 | 0.566613 | 0.533809 | Itsn1/Spat |
| GO_MF_mzGO:001984rRNA bindi3/690    | 70/23049  | 0.349565 | 0.566613 | 0.533809 | Ppan/Rps1  |
| GO_MF_mzGO:009711scaffold pr3/690   | 70/23049  | 0.349565 | 0.566613 | 0.533809 | Cacna1g/D  |
| GO_MF_mzGO:000517hormone a5/690     | 130/23049 | 0.3496   | 0.566613 | 0.533809 | C1qtnf12/f |
| GO_MF_mzGO:001713Rab GTPas6/690     | 161/23049 | 0.351815 | 0.56881  | 0.535879 | Kif16b/Npc |
| GO_MF_mzGO:000801microtubul8/690    | 223/23049 | 0.352094 | 0.56881  | 0.535879 | Casc1/Kif1 |
| GO_MF_mzGO:000098proximal p16/690   | 477/23049 | 0.356621 | 0.573193 | 0.540008 | Atf6b/Ddit |
| GO_MF_mzGO:004830calcium-de3/690    | 71/23049  | 0.357781 | 0.573193 | 0.540008 | Mbl1/Mbl2  |
| GO_MF_mzGO:000098transcriptic15/690 | 446/23049 | 0.359433 | 0.573193 | 0.540008 | Ddit3/Esr2 |
| GO_MF_mzGO:000367DNA helica2/690    | 42/23049  | 0.359446 | 0.573193 | 0.540008 | Brip1/Recq |
| GO_MF_mzGO:001507potassium 6/690    | 163/23049 | 0.362492 | 0.573193 | 0.540008 | Atp1b4/Kc  |
| GO_MF_mzGO:005083cell adhesi16/690  | 480/23049 | 0.3659   | 0.573193 | 0.540008 | Arhgap18/  |
| GO_MF_mzGO:000379lysozyme a1/690    | 15/23049  | 0.366213 | 0.573193 | 0.540008 | Lyz1       |
| GO_MF_mzGO:000470MAP kinas1/690     | 15/23049  | 0.366213 | 0.573193 | 0.540008 | Mapk14     |
| GO_MF_mzGO:000516neurotropt1/690    | 15/23049  | 0.366213 | 0.573193 | 0.540008 | Grb2       |
| GO_MF_mzGO:000817adenylate c1/690   | 15/23049  | 0.366213 | 0.573193 | 0.540008 | Cap2       |
| GO_MF_mzGO:001521nucleotide 1/690   | 15/23049  | 0.366213 | 0.573193 | 0.540008 | Slc25a25   |
| GO_MF_mzGO:001592mannosida1/690     | 15/23049  | 0.366213 | 0.573193 | 0.540008 | Manba      |
| GO_MF_mzGO:001708chloride ch1/690   | 15/23049  | 0.366213 | 0.573193 | 0.540008 | Vamp8      |
| GO_MF_mzGO:002282potassium 1/690    | 15/23049  | 0.366213 | 0.573193 | 0.540008 | Slc9a4     |
| GO_MF_mzGO:002284potassium 1/690    | 15/23049  | 0.366213 | 0.573193 | 0.540008 | Kcnk6      |
| GO_MF_mzGO:003205bile acid bi1/690  | 15/23049  | 0.366213 | 0.573193 | 0.540008 | Vdr        |
| GO_MF_mzGO:004317amine binc1/690    | 15/23049  | 0.366213 | 0.573193 | 0.540008 | Htr2c      |
| GO_MF_mzGO:004421intrinsic tra1/690 | 15/23049  | 0.366213 | 0.573193 | 0.540008 | Vax2       |
| GO_MF_mzGO:004693proton-tra1/690    | 15/23049  | 0.366213 | 0.573193 | 0.540008 | Atp5c1     |
| GO_MF_mzGO:000520extracellula2/690  | 43/23049  | 0.370283 | 0.573193 | 0.540008 | Eln/Tectb  |
| GO_MF_mzGO:000527sodium ch2/690     | 43/23049  | 0.370283 | 0.573193 | 0.540008 | Cacna1g/C  |
| GO_MF_mzGO:001545potassium 2/690    | 43/23049  | 0.370283 | 0.573193 | 0.540008 | Kcne1/Ned  |

|                                      |           |          |          |          |             |
|--------------------------------------|-----------|----------|----------|----------|-------------|
| GO_MF_mzGO:001566ATPase act 2/690    | 43/23049  | 0.370283 | 0.573193 | 0.540008 | Atp1b4/Atj  |
| GO_MF_mzGO:003054Hsp70 prot 2/690    | 43/23049  | 0.370283 | 0.573193 | 0.540008 | Dnajb14/Rj  |
| GO_MF_mzGO:003293sterol bindi 2/690  | 43/23049  | 0.370283 | 0.573193 | 0.540008 | Apoa4/Sta   |
| GO_MF_mzGO:004280actinin bin 2/690   | 43/23049  | 0.370283 | 0.573193 | 0.540008 | Myom2/Re    |
| GO_MF_mzGO:009952G-protein i 2/690   | 43/23049  | 0.370283 | 0.573193 | 0.540008 | Htr2c/Olfr4 |
| GO_MF_mzGO:000839steroid hyc 3/690   | 73/23049  | 0.374164 | 0.578306 | 0.544825 | Cyp2a22/C   |
| GO_MF_mzGO:003107heat shock 5/690    | 135/23049 | 0.379364 | 0.580118 | 0.546533 | Camkmt/D    |
| GO_MF_mzGO:001679exonucleas 2/690    | 44/23049  | 0.381046 | 0.580118 | 0.546533 | Cnot6/Eri2  |
| GO_MF_mzGO:000512cytokine re 11/690  | 325/23049 | 0.382332 | 0.580118 | 0.546533 | Defb33/De   |
| GO_MF_mzGO:004801receptor lig 16/690 | 486/23049 | 0.384572 | 0.580118 | 0.546533 | Defb33/De   |
| GO_MF_mzGO:000512death recej 1/690   | 16/23049  | 0.385199 | 0.580118 | 0.546533 | Ripk1       |
| GO_MF_mzGO:000518pheromon 1/690      | 16/23049  | 0.385199 | 0.580118 | 0.546533 | Esp16       |
| GO_MF_mzGO:001509magnesium 1/690     | 16/23049  | 0.385199 | 0.580118 | 0.546533 | Nipa2       |
| GO_MF_mzGO:001529solute:prot 1/690   | 16/23049  | 0.385199 | 0.580118 | 0.546533 | Slc9a4      |
| GO_MF_mzGO:001672oxidoreduc 1/690    | 16/23049  | 0.385199 | 0.580118 | 0.546533 | Heph        |
| GO_MF_mzGO:001680dipeptidas 1/690    | 16/23049  | 0.385199 | 0.580118 | 0.546533 | Dpep1       |
| GO_MF_mzGO:001711nucleoside 1/690    | 16/23049  | 0.385199 | 0.580118 | 0.546533 | Nudt5       |
| GO_MF_mzGO:001716Ral GTPase 1/690    | 16/23049  | 0.385199 | 0.580118 | 0.546533 | Ralgsps1    |
| GO_MF_mzGO:003029protein tyr 1/690   | 16/23049  | 0.385199 | 0.580118 | 0.546533 | Gas6        |
| GO_MF_mzGO:003418apolipopro 1/690    | 16/23049  | 0.385199 | 0.580118 | 0.546533 | Lipc        |
| GO_MF_mzGO:004280histone me 1/690    | 16/23049  | 0.385199 | 0.580118 | 0.546533 | Dydc1       |
| GO_MF_mzGO:004312neurotropt 1/690    | 16/23049  | 0.385199 | 0.580118 | 0.546533 | Pzp         |
| GO_MF_mzGO:005137muscle alpl 1/690   | 16/23049  | 0.385199 | 0.580118 | 0.546533 | Myom2       |
| GO_MF_mzGO:001675transferase 7/690   | 199/23049 | 0.38667  | 0.581459 | 0.547796 | A4galt/B3g  |
| GO_MF_mzGO:001537solute:sodi 3/690   | 75/23049  | 0.390463 | 0.586281 | 0.552338 | Gm5134/Sl   |
| GO_MF_mzGO:000486endopeptic 7/690    | 200/23049 | 0.391573 | 0.586423 | 0.552472 | Dpep1/Gas   |
| GO_MF_mzGO:003281tumor necr 2/690    | 45/23049  | 0.39173  | 0.586423 | 0.552472 | Ripk1/Traf  |
| GO_MF_mzGO:004256hormone b 4/690     | 107/23049 | 0.398954 | 0.596344 | 0.561819 | Esr2/Hctr1  |
| GO_MF_mzGO:004802CCR chem 2/690      | 46/23049  | 0.402331 | 0.597066 | 0.562499 | Defb33/De   |
| GO_MF_mzGO:199084promoter-: 2/690    | 46/23049  | 0.402331 | 0.597066 | 0.562499 | Esr2/Rbl1   |
| GO_MF_mzGO:000455nucleoside 1/690    | 17/23049  | 0.403616 | 0.597066 | 0.562499 | Nme5        |
| GO_MF_mzGO:001978SUMO tran 1/690     | 17/23049  | 0.403616 | 0.597066 | 0.562499 | Ube2i       |
| GO_MF_mzGO:002288macromole 1/690     | 17/23049  | 0.403616 | 0.597066 | 0.562499 | Tomm7       |
| GO_MF_mzGO:003027LRR domai 1/690     | 17/23049  | 0.403616 | 0.597066 | 0.562499 | Ddit3       |
| GO_MF_mzGO:004342protein kin. 1/690  | 17/23049  | 0.403616 | 0.597066 | 0.562499 | Bcl10       |
| GO_MF_mzGO:000802protein C-t8/690    | 235/23049 | 0.406574 | 0.598901 | 0.564228 | Bcl10/Cacr  |
| GO_MF_mzGO:003361activating t 3/690  | 77/23049  | 0.406654 | 0.598901 | 0.564228 | Ldb2/Rbl1/  |
| GO_MF_mzGO:004317alcohol bin 3/690   | 77/23049  | 0.406654 | 0.598901 | 0.564228 | Apoa4/Asti  |
| GO_MF_mzGO:003024carbohydr 9/690     | 268/23049 | 0.410681 | 0.603571 | 0.568627 | Clec4a2/Lg  |
| GO_MF_mzGO:000549steroid bin 4/690   | 109/23049 | 0.412486 | 0.603571 | 0.568627 | Apoa4/Esr   |
| GO_MF_mzGO:000109basal trans 2/690   | 47/23049  | 0.412842 | 0.603571 | 0.568627 | Recql5/Sm   |
| GO_MF_mzGO:000109basal RNA 2/690     | 47/23049  | 0.412842 | 0.603571 | 0.568627 | Recql5/Sm   |
| GO_MF_mzGO:001679thiolester h 2/690  | 47/23049  | 0.412842 | 0.603571 | 0.568627 | Abhd13/Ni   |
| GO_MF_mzGO:001919transmemt 3/690     | 78/23049  | 0.414702 | 0.605404 | 0.570354 | Erbp2/Ret/  |
| GO_MF_mzGO:190168sulfur com 8/690    | 237/23049 | 0.415676 | 0.605942 | 0.570861 | Ager/Fst/H  |
| GO_MF_mzGO:000541amino acid 1/690    | 18/23049  | 0.421483 | 0.610845 | 0.57548  | Slc1a6      |
| GO_MF_mzGO:001986immunogl 1/690      | 18/23049  | 0.421483 | 0.610845 | 0.57548  | Lgals3      |
| GO_MF_mzGO:002284leak chann 1/690    | 18/23049  | 0.421483 | 0.610845 | 0.57548  | Kcnk6       |

|                   |                   |           |          |          |          |             |
|-------------------|-------------------|-----------|----------|----------|----------|-------------|
| GO_MF_mzGO:002284 | narrow por1/690   | 18/23049  | 0.421483 | 0.610845 | 0.57548  | Kcnk6       |
| GO_MF_mzGO:000487 | nuclear rec2/690  | 48/23049  | 0.423261 | 0.611649 | 0.576238 | Esr2/Vdr    |
| GO_MF_mzGO:009853 | transcripti2/690  | 48/23049  | 0.423261 | 0.611649 | 0.576238 | Esr2/Vdr    |
| GO_MF_mzGO:006113 | endopeptic7/690   | 207/23049 | 0.425866 | 0.614526 | 0.578948 | Dpep1/Gas   |
| GO_MF_mzGO:000438 | helicase ac5/690  | 144/23049 | 0.432729 | 0.618921 | 0.583089 | Brip1/Recq  |
| GO_MF_mzGO:00011C | RNA polym2/690    | 49/23049  | 0.433584 | 0.618921 | 0.583089 | Ldb2/Rbl1   |
| GO_MF_mzGO:000374 | translation 2/690 | 49/23049  | 0.433584 | 0.618921 | 0.583089 | Eif3a/Eif3e |
| GO_MF_mzGO:004227 | peptide bir10/690 | 306/23049 | 0.434155 | 0.618921 | 0.583089 | H2-M10.1/   |
| GO_MF_mzGO:000521 | ion channe13/690  | 404/23049 | 0.43503  | 0.618921 | 0.583089 | Cacna1b/C   |
| GO_MF_mzGO:000526 | cation char10/690 | 307/23049 | 0.43818  | 0.618921 | 0.583089 | Cacna1b/C   |
| GO_MF_mzGO:006113 | peptidase r8/690  | 242/23049 | 0.438391 | 0.618921 | 0.583089 | Bcl10/Dpep  |
| GO_MF_mzGO:00162C | antioxidant3/690  | 81/23049  | 0.438624 | 0.618921 | 0.583089 | Apoa4/Mp    |
| GO_MF_mzGO:00039E | NAD+ ADF1/690     | 19/23049  | 0.438815 | 0.618921 | 0.583089 | Parp11      |
| GO_MF_mzGO:00085E | proton-exp1/690   | 19/23049  | 0.438815 | 0.618921 | 0.583089 | Atp6v1e2    |
| GO_MF_mzGO:003016 | low-densit1/690   | 19/23049  | 0.438815 | 0.618921 | 0.583089 | Lipc        |
| GO_MF_mzGO:004327 | phospholip1/690   | 19/23049  | 0.438815 | 0.618921 | 0.583089 | Srsf3       |
| GO_MF_mzGO:004696 | proton-tra1/690   | 19/23049  | 0.438815 | 0.618921 | 0.583089 | Atp6v1e2    |
| GO_MF_mzGO:005043 | transformir1/690  | 19/23049  | 0.438815 | 0.618921 | 0.583089 | Vasn        |
| GO_MF_mzGO:00617E | peptidogly1/690   | 19/23049  | 0.438815 | 0.618921 | 0.583089 | Lyz11       |
| GO_MF_mzGO:00976C | cullin famil1/690 | 19/23049  | 0.438815 | 0.618921 | 0.583089 | Kctd6       |
| GO_MF_mzGO:003041 | peptidase i7/690  | 210/23049 | 0.440509 | 0.620435 | 0.584515 | Dpep1/Gas   |
| GO_MF_mzGO:001682 | lyase activi6/690 | 178/23049 | 0.442571 | 0.621577 | 0.585591 | Acmsd/Car   |
| GO_MF_mzGO:006009 | molecular r6/690  | 178/23049 | 0.442571 | 0.621577 | 0.585591 | Cbx5/Dsp/   |
| GO_MF_mzGO:000823 | metalloexo2/690   | 50/23049  | 0.443806 | 0.621577 | 0.585591 | Cpa2/Dpep   |
| GO_MF_mzGO:00453C | protein phr2/690  | 50/23049  | 0.443806 | 0.621577 | 0.585591 | Grb2/Lck    |
| GO_MF_mzGO:000377 | microtubul3/690   | 82/23049  | 0.446516 | 0.623176 | 0.587097 | Dynll2/Kif1 |
| GO_MF_mzGO:001983 | growth fac5/690   | 147/23049 | 0.450329 | 0.623176 | 0.587097 | Erbp2/Igfb  |
| GO_MF_mzGO:000392 | GTPase act9/690   | 278/23049 | 0.453265 | 0.623176 | 0.587097 | Agap3/F83   |
| GO_MF_mzGO:000532 | neurotrans2/690   | 51/23049  | 0.453925 | 0.623176 | 0.587097 | Slc17a8/Slc |
| GO_MF_mzGO:001704 | peptide ho2/690   | 51/23049  | 0.453925 | 0.623176 | 0.587097 | Hcrtr1/Inh  |
| GO_MF_mzGO:003014 | manganesr2/690    | 51/23049  | 0.453925 | 0.623176 | 0.587097 | Nudt7/Pim   |
| GO_MF_mzGO:199093 | ATP-deper2/690    | 51/23049  | 0.453925 | 0.623176 | 0.587097 | Dynll2/Kif1 |
| GO_MF_mzGO:000113 | RNA polym1/690    | 20/23049  | 0.455629 | 0.623176 | 0.587097 | Vdr         |
| GO_MF_mzGO:000122 | transcripti1/690  | 20/23049  | 0.455629 | 0.623176 | 0.587097 | Nfatc1      |
| GO_MF_mzGO:000524 | inward rect1/690  | 20/23049  | 0.455629 | 0.623176 | 0.587097 | Kcnj14      |
| GO_MF_mzGO:000864 | rRNA meth1/690    | 20/23049  | 0.455629 | 0.623176 | 0.587097 | Mrm2        |
| GO_MF_mzGO:003121 | phosphatic1/690   | 20/23049  | 0.455629 | 0.623176 | 0.587097 | Apoa4       |
| GO_MF_mzGO:00314E | myosin V b1/690   | 20/23049  | 0.455629 | 0.623176 | 0.587097 | Npc1l1      |
| GO_MF_mzGO:004297 | peroxisomr1/690   | 20/23049  | 0.455629 | 0.623176 | 0.587097 | Esr2        |
| GO_MF_mzGO:005099 | quaternary1/690   | 20/23049  | 0.455629 | 0.623176 | 0.587097 | Apoa4       |
| GO_MF_mzGO:007006 | proline-ricl1/690 | 20/23049  | 0.455629 | 0.623176 | 0.587097 | Itsn1       |
| GO_MF_mzGO:01401C | catalytic ac1/690 | 20/23049  | 0.455629 | 0.623176 | 0.587097 | Mrm2        |
| GO_MF_mzGO:000202 | protease b5/690   | 148/23049 | 0.456165 | 0.623176 | 0.587097 | Bcl10/Mbl1  |
| GO_MF_mzGO:004239 | histone bin6/690  | 182/23049 | 0.463675 | 0.632572 | 0.595949 | Anp32b/Ck   |
| GO_MF_mzGO:000801 | beta-caten3/690   | 85/23049  | 0.469917 | 0.638619 | 0.601646 | Cdh24/Ctn   |
| GO_MF_mzGO:000187 | pattern bin1/690  | 21/23049  | 0.471939 | 0.638619 | 0.601646 | Mbl1        |
| GO_MF_mzGO:000401 | phospholip1/690   | 21/23049  | 0.471939 | 0.638619 | 0.601646 | Abcb4       |
| GO_MF_mzGO:00192C | nucleotide 1/690  | 21/23049  | 0.471939 | 0.638619 | 0.601646 | Ak3         |

|                                      |           |          |          |          |                     |
|--------------------------------------|-----------|----------|----------|----------|---------------------|
| GO_MF_mzGO:003024polysaccha 1/690    | 21/23049  | 0.471939 | 0.638619 | 0.601646 | Mbl1                |
| GO_MF_mzGO:007069transmemt 1/690     | 21/23049  | 0.471939 | 0.638619 | 0.601646 | Inhba               |
| GO_MF_mzGO:000471protein tyr5/690    | 152/23049 | 0.479324 | 0.647735 | 0.610234 | ErbB2/Grb2          |
| GO_MF_mzGO:009951ion antipor 2/690   | 54/23049  | 0.483633 | 0.651217 | 0.613515 | Slc8a1/Slc9a1       |
| GO_MF_mzGO:000028magnesiun 6/690     | 186/23049 | 0.484568 | 0.651217 | 0.613515 | Ern2/Nudt9          |
| GO_MF_mzGO:000003mannosyltr 1/690    | 22/23049  | 0.487762 | 0.651217 | 0.613515 | Pigv                |
| GO_MF_mzGO:000477sterol ester 1/690  | 22/23049  | 0.487762 | 0.651217 | 0.613515 | Ces2h               |
| GO_MF_mzGO:000538zinc ion tra 1/690  | 22/23049  | 0.487762 | 0.651217 | 0.613515 | Slc39a8             |
| GO_MF_mzGO:001512bile acid tra 1/690 | 22/23049  | 0.487762 | 0.651217 | 0.613515 | Slc51a              |
| GO_MF_mzGO:001527calcium-rele 1/690  | 22/23049  | 0.487762 | 0.651217 | 0.613515 | Tpcn2               |
| GO_MF_mzGO:001560organophc 1/690     | 22/23049  | 0.487762 | 0.651217 | 0.613515 | Slc25a25            |
| GO_MF_mzGO:004696retinoid X r 1/690  | 22/23049  | 0.487762 | 0.651217 | 0.613515 | Vdr                 |
| GO_MF_mzGO:003162ubiquitin p 10/690  | 322/23049 | 0.498046 | 0.660251 | 0.622026 | Anapc2/Aurkb        |
| GO_MF_mzGO:007234modified a 3/690    | 89/23049  | 0.5004   | 0.660251 | 0.622026 | Dpep1/Folr1         |
| GO_MF_mzGO:000554phospholip 2/690    | 56/23049  | 0.502873 | 0.660251 | 0.622026 | Abcb4/Tnf- $\alpha$ |
| GO_MF_mzGO:001690oxidoreduc 2/690    | 56/23049  | 0.502873 | 0.660251 | 0.622026 | Aox3/Pdhx           |
| GO_MF_mzGO:000101transcriptic 1/690  | 23/23049  | 0.503111 | 0.660251 | 0.622026 | Vdr                 |
| GO_MF_mzGO:000418metallocarb 1/690   | 23/23049  | 0.503111 | 0.660251 | 0.622026 | Cpa2                |
| GO_MF_mzGO:000817O-methyltr 1/690    | 23/23049  | 0.503111 | 0.660251 | 0.622026 | Mrm2                |
| GO_MF_mzGO:000819ferrous iron 1/690  | 23/23049  | 0.503111 | 0.660251 | 0.622026 | Heph                |
| GO_MF_mzGO:001679hydrolase 1/690     | 23/23049  | 0.503111 | 0.660251 | 0.622026 | Rps3                |
| GO_MF_mzGO:003037translation 1/690   | 23/23049  | 0.503111 | 0.660251 | 0.622026 | Purb                |
| GO_MF_mzGO:003143mitogen-act 1/690   | 23/23049  | 0.503111 | 0.660251 | 0.622026 | Map3k11             |
| GO_MF_mzGO:003361receptor se 1/690   | 23/23049  | 0.503111 | 0.660251 | 0.622026 | Inhba               |
| GO_MF_mzGO:003528UDP-galac 1/690     | 23/23049  | 0.503111 | 0.660251 | 0.622026 | A4galt              |
| GO_MF_mzGO:000508Ras guanyl 4/690    | 124/23049 | 0.511011 | 0.668388 | 0.629692 | Itsn1/Ralgap2       |
| GO_MF_mzGO:003559signaling a 2/690   | 57/23049  | 0.512318 | 0.668388 | 0.629692 | Grb2/Grb7           |
| GO_MF_mzGO:000104core prom 3/690     | 91/23049  | 0.515304 | 0.668388 | 0.629692 | Esr2/Gata1          |
| GO_MF_mzGO:000524voltage-ga 3/690    | 91/23049  | 0.515304 | 0.668388 | 0.629692 | Kcne1/Kcnl1         |
| GO_MF_mzGO:000163G-protein 1/690     | 24/23049  | 0.518001 | 0.668388 | 0.629692 | Ackr2               |
| GO_MF_mzGO:000184compleme 1/690      | 24/23049  | 0.518001 | 0.668388 | 0.629692 | C3ar1               |
| GO_MF_mzGO:000495chemokine 1/690     | 24/23049  | 0.518001 | 0.668388 | 0.629692 | Ackr2               |
| GO_MF_mzGO:001995chemokine 1/690     | 24/23049  | 0.518001 | 0.668388 | 0.629692 | Ackr2               |
| GO_MF_mzGO:003054receptor in 1/690   | 24/23049  | 0.518001 | 0.668388 | 0.629692 | Ly6g6d              |
| GO_MF_mzGO:003168G-protein 1/690     | 24/23049  | 0.518001 | 0.668388 | 0.629692 | Gnat1               |
| GO_MF_mzGO:004292neuropepti 1/690    | 24/23049  | 0.518001 | 0.668388 | 0.629692 | Sstr5               |
| GO_MF_mzGO:005286phosphatic 1/690    | 24/23049  | 0.518001 | 0.668388 | 0.629692 | Mtmt14              |
| GO_MF_mzGO:007041R-SMAD b 1/690      | 24/23049  | 0.518001 | 0.668388 | 0.629692 | Zeb2                |
| GO_MF_mzGO:000370steroid hor 2/690   | 58/23049  | 0.521644 | 0.672221 | 0.633303 | Esr2/Vdr            |
| GO_MF_mzGO:003149chromatin 3/690     | 92/23049  | 0.522666 | 0.672671 | 0.633727 | Gata1/Rela          |
| GO_MF_mzGO:001701Ras GTPase 12/690   | 397/23049 | 0.527578 | 0.677411 | 0.638193 | Itsn1/Kif16l        |
| GO_MF_mzGO:000526potassium 4/690     | 127/23049 | 0.529841 | 0.677411 | 0.638193 | Kcne1/Kcnl1         |
| GO_MF_mzGO:014003modificatic 4/690   | 127/23049 | 0.529841 | 0.677411 | 0.638193 | Agap3/Cbx2          |
| GO_MF_mzGO:001704Rho GTPase 5/690    | 161/23049 | 0.5301   | 0.677411 | 0.638193 | Itsn1/Map3k11       |
| GO_MF_mzGO:000153lipopolysac 1/690   | 25/23049  | 0.532445 | 0.677411 | 0.638193 | Sftpa1              |
| GO_MF_mzGO:000167ATPase act 1/690    | 25/23049  | 0.532445 | 0.677411 | 0.638193 | Atp1b4              |
| GO_MF_mzGO:001628CoA hydro 1/690     | 25/23049  | 0.532445 | 0.677411 | 0.638193 | Nudt7               |
| GO_MF_mzGO:003517histone ser 1/690   | 25/23049  | 0.532445 | 0.677411 | 0.638193 | Aurka               |

|                                     |           |          |          |          |            |
|-------------------------------------|-----------|----------|----------|----------|------------|
| GO_MF_mzGO:004696thyroid hor1/690   | 25/23049  | 0.532445 | 0.677411 | 0.638193 | Trip12     |
| GO_MF_mzGO:000802ATP-deper3/690     | 94/23049  | 0.537203 | 0.68173  | 0.642262 | Brip1/Recq |
| GO_MF_mzGO:007003purine NTF3/690    | 94/23049  | 0.537203 | 0.68173  | 0.642262 | Brip1/Recq |
| GO_MF_mzGO:003645thiol-deper3/690   | 95/23049  | 0.544377 | 0.686504 | 0.646759 | Otud6a/Uc  |
| GO_MF_mzGO:010100ubiquitinyl 3/690  | 95/23049  | 0.544377 | 0.686504 | 0.646759 | Otud6a/Uc  |
| GO_MF_mzGO:000467AMP-activ1/690     | 26/23049  | 0.546457 | 0.686504 | 0.646759 | Prkag1     |
| GO_MF_mzGO:000532neurotrans1/690    | 26/23049  | 0.546457 | 0.686504 | 0.646759 | Slc1a6     |
| GO_MF_mzGO:001702TBP-class r1/690   | 26/23049  | 0.546457 | 0.686504 | 0.646759 | Dr1        |
| GO_MF_mzGO:001713fibroblast c1/690  | 26/23049  | 0.546457 | 0.686504 | 0.646759 | Rps2       |
| GO_MF_mzGO:0051532 iron, 2 su1/690  | 26/23049  | 0.546457 | 0.686504 | 0.646759 | Aox3       |
| GO_MF_mzGO:007194FAD bindin1/690    | 26/23049  | 0.546457 | 0.686504 | 0.646759 | Coq6       |
| GO_MF_mzGO:000377motor activ4/690   | 130/23049 | 0.548309 | 0.687966 | 0.648136 | Cgnl1/Dynl |
| GO_MF_mzGO:004438ubiquitin-li10/690 | 337/23049 | 0.556131 | 0.690567 | 0.650587 | Anapc2/Au  |
| GO_MF_mzGO:000551collagen bi2/690   | 62/23049  | 0.557733 | 0.690567 | 0.650587 | Cspg4/Lurr |
| GO_MF_mzGO:007049repressing 2/690   | 62/23049  | 0.557733 | 0.690567 | 0.650587 | Cbx5/Rela  |
| GO_MF_mzGO:000377actin bindir12/690 | 406/23049 | 0.559039 | 0.690567 | 0.650587 | Arc/Cap2/C |
| GO_MF_mzGO:000468calmodulin1/690    | 27/23049  | 0.56005  | 0.690567 | 0.650587 | Camk1g     |
| GO_MF_mzGO:000518neuropepti1/690    | 27/23049  | 0.56005  | 0.690567 | 0.650587 | Hcrt       |
| GO_MF_mzGO:000525delayed rec1/690   | 27/23049  | 0.56005  | 0.690567 | 0.650587 | Kcne1      |
| GO_MF_mzGO:000534organic aci1/690   | 27/23049  | 0.56005  | 0.690567 | 0.650587 | Slc1a6     |
| GO_MF_mzGO:000806glutamate 1/690    | 27/23049  | 0.56005  | 0.690567 | 0.650587 | Grm1       |
| GO_MF_mzGO:001709AU-rich ele1/690   | 27/23049  | 0.56005  | 0.690567 | 0.650587 | Zfp36l1    |
| GO_MF_mzGO:00197C protein-cys1/690  | 27/23049  | 0.56005  | 0.690567 | 0.650587 | Zdhhc22    |
| GO_MF_mzGO:00197C protein-cys1/690  | 27/23049  | 0.56005  | 0.690567 | 0.650587 | Zdhhc22    |
| GO_MF_mzGO:00700C aspartic-ty1/690  | 27/23049  | 0.56005  | 0.690567 | 0.650587 | Astl       |
| GO_MF_mzGO:190468peptide tra1/690   | 27/23049  | 0.56005  | 0.690567 | 0.650587 | Tomm7      |
| GO_MF_mzGO:00190C GDP bindir2/690   | 63/23049  | 0.566447 | 0.697595 | 0.657208 | Prps2/Rab3 |
| GO_MF_mzGO:000823exopeptida3/690    | 99/23049  | 0.572411 | 0.700777 | 0.660206 | Cpa2/Dper  |
| GO_MF_mzGO:00083C structural c1/690 | 28/23049  | 0.573236 | 0.700777 | 0.660206 | Myom2      |
| GO_MF_mzGO:004353protein ser1/690   | 28/23049  | 0.573236 | 0.700777 | 0.660206 | Spry2      |
| GO_MF_mzGO:007181lipoprotein1/690   | 28/23049  | 0.573236 | 0.700777 | 0.660206 | Lipc       |
| GO_MF_mzGO:007181protein-lip1/690   | 28/23049  | 0.573236 | 0.700777 | 0.660206 | Lipc       |
| GO_MF_mzGO:00996C ligand-gat1/690   | 28/23049  | 0.573236 | 0.700777 | 0.660206 | Tpcn2      |
| GO_MF_mzGO:005128NAD bindir2/690    | 64/23049  | 0.575037 | 0.702121 | 0.661472 | Aox3/Grhp  |
| GO_MF_mzGO:005121phosphopr3/690     | 100/23049 | 0.57925  | 0.706403 | 0.665506 | Grb2/Lck/T |
| GO_MF_mzGO:005153iron-sulfur 2/690  | 65/23049  | 0.583502 | 0.709476 | 0.668401 | Aox3/Brip1 |
| GO_MF_mzGO:005154metal clust2/690   | 65/23049  | 0.583502 | 0.709476 | 0.668401 | Aox3/Brip1 |
| GO_MF_mzGO:000522calcium act1/690   | 29/23049  | 0.586027 | 0.709476 | 0.668401 | Catsper2   |
| GO_MF_mzGO:000524calcium ch1/690    | 29/23049  | 0.586027 | 0.709476 | 0.668401 | Cabp4      |
| GO_MF_mzGO:000552insulin-like1/690  | 29/23049  | 0.586027 | 0.709476 | 0.668401 | Igfbp1     |
| GO_MF_mzGO:003644proton-exr1/690    | 29/23049  | 0.586027 | 0.709476 | 0.668401 | Atp6v1e2   |
| GO_MF_mzGO:000471non-memk2/690      | 66/23049  | 0.591842 | 0.714784 | 0.673402 | Grb2/Lck   |
| GO_MF_mzGO:004237chemokine2/690     | 66/23049  | 0.591842 | 0.714784 | 0.673402 | Defb33/De  |
| GO_MF_mzGO:001529solute:catic3/690  | 102/23049 | 0.59272  | 0.714982 | 0.673588 | Gm5134/SI  |
| GO_MF_mzGO:007185neuropepti1/690    | 30/23049  | 0.598435 | 0.721006 | 0.679264 | Hcrt       |
| GO_MF_mzGO:003027clathrin bin2/690  | 67/23049  | 0.600056 | 0.722089 | 0.680284 | Gak/Syt16  |
| GO_MF_mzGO:00055C iron ion bir5/690 | 175/23049 | 0.604289 | 0.726309 | 0.68426  | Aox3/Cyp1  |
| GO_MF_mzGO:004302ribonucleo14/690   | 140/23049 | 0.606972 | 0.727619 | 0.685494 | Cbx5/Gemi  |

|                                      |           |          |          |          |              |
|--------------------------------------|-----------|----------|----------|----------|--------------|
| GO_MF_mzGO:00198Eprotein phc2/690    | 68/23049  | 0.608146 | 0.727619 | 0.685494 | 4933415F2    |
| GO_MF_mzGO:00302Eprotein kin.2/690   | 68/23049  | 0.608146 | 0.727619 | 0.685494 | Gas6/Spry2   |
| GO_MF_mzGO:00051Etype I inter 1/690  | 31/23049  | 0.610472 | 0.727619 | 0.685494 | lfna12       |
| GO_MF_mzGO:001641S-acyltrans 1/690   | 31/23049  | 0.610472 | 0.727619 | 0.685494 | Zdhhc22      |
| GO_MF_mzGO:00305E spectrin bir 1/690 | 31/23049  | 0.610472 | 0.727619 | 0.685494 | Sptan1       |
| GO_MF_mzGO:00432E laminin bin 1/690  | 31/23049  | 0.610472 | 0.727619 | 0.685494 | Lgals3       |
| GO_MF_mzGO:00037E mRNA 3'-L 2/690    | 69/23049  | 0.61611  | 0.733437 | 0.690975 | Gemin5/Zf    |
| GO_MF_mzGO:00038E antigen bir 6/690  | 213/23049 | 0.61682  | 0.733437 | 0.690975 | H2-M10.1/    |
| GO_MF_mzGO:00168E endonucle: 1/690   | 32/23049  | 0.622149 | 0.736271 | 0.693645 | Dnase1       |
| GO_MF_mzGO:00429E retinoic aci 1/690 | 32/23049  | 0.622149 | 0.736271 | 0.693645 | Vdr          |
| GO_MF_mzGO:00430E alpha-tubu 1/690   | 32/23049  | 0.622149 | 0.736271 | 0.693645 | Casc1        |
| GO_MF_mzGO:00455E dynein inte 1/690  | 32/23049  | 0.622149 | 0.736271 | 0.693645 | Dynll2       |
| GO_MF_mzGO:00199E cytokine bi 3/690  | 107/23049 | 0.625149 | 0.738947 | 0.696166 | Ackr2/Agel   |
| GO_MF_mzGO:00081E UDP-glyco 4/690    | 144/23049 | 0.629091 | 0.740908 | 0.698013 | A4galt/B3G   |
| GO_MF_mzGO:000371transcriptic 5/690  | 180/23049 | 0.629108 | 0.740908 | 0.698013 | Cdyl2/Cop:   |
| GO_MF_mzGO:00082E G-protein r 2/690  | 71/23049  | 0.631665 | 0.740908 | 0.698013 | Htr2c/Olfr4  |
| GO_MF_mzGO:00043E glutathione 1/690  | 33/23049  | 0.633476 | 0.740908 | 0.698013 | Gstm6        |
| GO_MF_mzGO:00048E protein phc 1/690  | 33/23049  | 0.633476 | 0.740908 | 0.698013 | 4933415F2    |
| GO_MF_mzGO:00051E tumor necr 1/690   | 33/23049  | 0.633476 | 0.740908 | 0.698013 | Traf4        |
| GO_MF_mzGO:00165E peptidase r 1/690  | 33/23049  | 0.633476 | 0.740908 | 0.698013 | Bcl10        |
| GO_MF_mzGO:00513E alpha-actin 1/690  | 33/23049  | 0.633476 | 0.740908 | 0.698013 | Myom2        |
| GO_MF_mzGO:00616E ubiquitin-li 1/690 | 33/23049  | 0.633476 | 0.740908 | 0.698013 | Ube2i        |
| GO_MF_mzGO:00197E ubiquitin-li 3/690 | 109/23049 | 0.637615 | 0.744875 | 0.70175  | Otud6a/Uc    |
| GO_MF_mzGO:00052E structural c 2/690 | 72/23049  | 0.639256 | 0.744875 | 0.70175  | Myom2/Tu     |
| GO_MF_mzGO:00090E electron tr: 2/690 | 72/23049  | 0.639256 | 0.744875 | 0.70175  | Aox3/Cycs    |
| GO_MF_mzGO:00080E growth fac: 4/690  | 146/23049 | 0.639847 | 0.744875 | 0.70175  | Fgf17/Fgf4   |
| GO_MF_mzGO:000521intracellula 1/690  | 34/23049  | 0.644464 | 0.745045 | 0.701911 | Tpcn2        |
| GO_MF_mzGO:00303E cyclin bindi 1/690 | 34/23049  | 0.644464 | 0.745045 | 0.701911 | Gak          |
| GO_MF_mzGO:00360E pre-mRNA 1/690     | 34/23049  | 0.644464 | 0.745045 | 0.701911 | Snrpc        |
| GO_MF_mzGO:00703E aromatase 1/690    | 34/23049  | 0.644464 | 0.745045 | 0.701911 | Cyp1a2       |
| GO_MF_mzGO:00705E adenyllyltra 1/690 | 34/23049  | 0.644464 | 0.745045 | 0.701911 | Oas2         |
| GO_MF_mzGO:009771disordered 1/690    | 34/23049  | 0.644464 | 0.745045 | 0.701911 | Rrm1         |
| GO_MF_mzGO:00011E transcriptic 1/690 | 35/23049  | 0.655123 | 0.753882 | 0.710236 | Vdr          |
| GO_MF_mzGO:00083E arachidon: 1/690   | 35/23049  | 0.655123 | 0.753882 | 0.710236 | Cyp2a22      |
| GO_MF_mzGO:00330E bitter taste 1/690 | 35/23049  | 0.655123 | 0.753882 | 0.710236 | Tas2r143     |
| GO_MF_mzGO:00517E protein phc 1/690  | 35/23049  | 0.655123 | 0.753882 | 0.710236 | Cacna1b      |
| GO_MF_mzGO:00051E cytokine ac 6/690  | 222/23049 | 0.656428 | 0.754515 | 0.710832 | lfna12/Il13, |
| GO_MF_mzGO:00037E peptidyl-pi 1/690  | 36/23049  | 0.665463 | 0.758672 | 0.714749 | Ppid         |
| GO_MF_mzGO:00168E carboxy-ly: 1/690  | 36/23049  | 0.665463 | 0.758672 | 0.714749 | Acmsd        |
| GO_MF_mzGO:001921phosphata: 1/690    | 36/23049  | 0.665463 | 0.758672 | 0.714749 | 4933415F2    |
| GO_MF_mzGO:00351E histone kin 1/690  | 36/23049  | 0.665463 | 0.758672 | 0.714749 | Aurka        |
| GO_MF_mzGO:00708E E-box bind 1/690   | 36/23049  | 0.665463 | 0.758672 | 0.714749 | Max          |
| GO_MF_mzGO:00010E RNA polyn 4/690    | 151/23049 | 0.665834 | 0.758672 | 0.714749 | Gata1/Ldb:   |
| GO_MF_mzGO:001661oxidoreduc 4/690    | 151/23049 | 0.665834 | 0.758672 | 0.714749 | Akr1d1/Ak:   |
| GO_MF_mzGO:00150E proton trar 3/690  | 114/23049 | 0.667495 | 0.758672 | 0.714749 | Atp5c1/At:   |
| GO_MF_mzGO:00305E neurotrans 3/690   | 114/23049 | 0.667495 | 0.758672 | 0.714749 | Grm1/Htr2    |
| GO_MF_mzGO:00037E double-str: 2/690  | 76/23049  | 0.66839  | 0.758672 | 0.714749 | Dus2/Oas2    |
| GO_MF_mzGO:00152E antiporter r 2/690 | 76/23049  | 0.66839  | 0.758672 | 0.714749 | Slc8a1/Slc:  |

|                                      |           |          |          |          |             |
|--------------------------------------|-----------|----------|----------|----------|-------------|
| GO_MF_mzGO:000097RNA polymr 1/690    | 37/23049  | 0.675494 | 0.76327  | 0.719081 | Gata1       |
| GO_MF_mzGO:00164C palmitoyltr.1/690  | 37/23049  | 0.675494 | 0.76327  | 0.719081 | Zdhhc22     |
| GO_MF_mzGO:003136 translation 1/690  | 37/23049  | 0.675494 | 0.76327  | 0.719081 | Tbl2        |
| GO_MF_mzGO:004216 SH2 domai1/690     | 37/23049  | 0.675494 | 0.76327  | 0.719081 | Lck         |
| GO_MF_mzGO:000856 protein tra2/690   | 78/23049  | 0.682229 | 0.768188 | 0.723714 | Mlc1/Tomr   |
| GO_MF_mzGO:00051C frizzled bin1/690  | 38/23049  | 0.685224 | 0.768188 | 0.723714 | Ror2        |
| GO_MF_mzGO:000839 arachidonic1/690   | 38/23049  | 0.685224 | 0.768188 | 0.723714 | Cyp2a22     |
| GO_MF_mzGO:001685 cis-trans is 1/690 | 38/23049  | 0.685224 | 0.768188 | 0.723714 | Ppid        |
| GO_MF_mzGO:005153 4 iron, 4 su1/690  | 38/23049  | 0.685224 | 0.768188 | 0.723714 | Brip1       |
| GO_MF_mzGO:006059 ATPase rec1/690    | 38/23049  | 0.685224 | 0.768188 | 0.723714 | Atp1b4      |
| GO_MF_mzGO:19015C carbohydr1/690     | 38/23049  | 0.685224 | 0.768188 | 0.723714 | Slc25a25    |
| GO_MF_mzGO:00192C phosphata2/690     | 79/23049  | 0.68897  | 0.769799 | 0.725231 | 4933415F2   |
| GO_MF_mzGO:004633 SMAD binc2/690     | 79/23049  | 0.68897  | 0.769799 | 0.725231 | Purb/Zeb2   |
| GO_MF_mzGO:00704C ammonium 2/690     | 79/23049  | 0.68897  | 0.769799 | 0.725231 | Apoa4/Htr   |
| GO_MF_mzGO:000418 carboxype1/690     | 39/23049  | 0.694663 | 0.771167 | 0.72652  | Cpa2        |
| GO_MF_mzGO:001593 nucleobase1/690    | 39/23049  | 0.694663 | 0.771167 | 0.72652  | Slc25a25    |
| GO_MF_mzGO:001622 steroid del1/690   | 39/23049  | 0.694663 | 0.771167 | 0.72652  | Akr1d1      |
| GO_MF_mzGO:004418 protein bin1/690   | 39/23049  | 0.694663 | 0.771167 | 0.72652  | Pdcl3       |
| GO_MF_mzGO:000104 core prom4/690     | 157/23049 | 0.695289 | 0.771167 | 0.72652  | Esr2/Gata1  |
| GO_MF_mzGO:000484 thiol-depe2/690    | 80/23049  | 0.695592 | 0.771167 | 0.72652  | Otud6a/Uc   |
| GO_MF_mzGO:003802 cargo recep2/690   | 80/23049  | 0.695592 | 0.771167 | 0.72652  | Ackr2/Folr  |
| GO_MF_mzGO:006163 ubiquitin p6/690   | 233/23049 | 0.701254 | 0.776583 | 0.731623 | Anapc2/Ne   |
| GO_MF_mzGO:002283 ion gated c8/690   | 307/23049 | 0.703306 | 0.776842 | 0.731867 | Cacna1b/C   |
| GO_MF_mzGO:000417 aminopept1/690     | 40/23049  | 0.703819 | 0.776842 | 0.731867 | Dpep1       |
| GO_MF_mzGO:001706 snRNA bin1/690     | 40/23049  | 0.703819 | 0.776842 | 0.731867 | Gemin5      |
| GO_MF_mzGO:000813 translation 2/690  | 82/23049  | 0.708487 | 0.781133 | 0.735909 | Eif3a/Eif3e |
| GO_MF_mzGO:000852 taste recep1/690   | 41/23049  | 0.712701 | 0.782015 | 0.736741 | Tas2r143    |
| GO_MF_mzGO:004848 beta-tubul1/690    | 41/23049  | 0.712701 | 0.782015 | 0.736741 | Casc1       |
| GO_MF_mzGO:009896 postsynapt1/690    | 41/23049  | 0.712701 | 0.782015 | 0.736741 | Grm1        |
| GO_MF_mzGO:002283 gated char8/690    | 310/23049 | 0.71338  | 0.782015 | 0.736741 | Cacna1b/C   |
| GO_MF_mzGO:000808 phosphoric2/690    | 83/23049  | 0.714762 | 0.782015 | 0.736741 | Gdpd1/Gd    |
| GO_MF_mzGO:001681 hydrolase e2/690   | 83/23049  | 0.714762 | 0.782015 | 0.736741 | Aga/Klk1b   |
| GO_MF_mzGO:003294 protein-co2/690    | 83/23049  | 0.714762 | 0.782015 | 0.736741 | Its1/Sept1  |
| GO_MF_mzGO:006165 ubiquitin-li6/690  | 237/23049 | 0.716542 | 0.78241  | 0.737113 | Anapc2/Ne   |
| GO_MF_mzGO:001563 tubulin bin8/690   | 311/23049 | 0.716688 | 0.78241  | 0.737113 | Casc1/Kif1  |
| GO_MF_mzGO:00046C peroxidase1/690    | 43/23049  | 0.729675 | 0.794853 | 0.748835 | Mpo         |
| GO_MF_mzGO:004439 ubiquitin-li1/690  | 43/23049  | 0.729675 | 0.794853 | 0.748835 | Rps3        |
| GO_MF_mzGO:004748 protein N-3/690    | 126/23049 | 0.731735 | 0.796229 | 0.750132 | Eif3e/Rela/ |
| GO_MF_mzGO:000525 anion chan2/690    | 86/23049  | 0.732908 | 0.796639 | 0.750518 | Lrrc8c/Slc1 |
| GO_MF_mzGO:000504 scavenger 1/690    | 44/23049  | 0.737782 | 0.800198 | 0.753871 | Ackr2       |
| GO_MF_mzGO:001662 oxidoreduc1/690    | 44/23049  | 0.737782 | 0.800198 | 0.753871 | Pdhx        |
| GO_MF_mzGO:005066 coenzyme 7/690     | 281/23049 | 0.73995  | 0.80168  | 0.755267 | Aox3/Coq6   |
| GO_MF_mzGO:000808 N-acetyltr2/690    | 88/23049  | 0.744453 | 0.805685 | 0.75904  | Nat8f1/Nat  |
| GO_MF_mzGO:000837 acetylgalac1/690   | 46/23049  | 0.753276 | 0.813473 | 0.766378 | B3gnt5      |
| GO_MF_mzGO:003033 estrogen re1/690   | 46/23049  | 0.753276 | 0.813473 | 0.766378 | Grm1        |
| GO_MF_mzGO:000122 transcriptic1/690  | 47/23049  | 0.760677 | 0.819695 | 0.772239 | Nfatc1      |
| GO_MF_mzGO:001668 oxidoreduc1/690    | 47/23049  | 0.760677 | 0.819695 | 0.772239 | Mpo         |
| GO_MF_mzGO:001984 vitamin bin3/690   | 133/23049 | 0.764459 | 0.822884 | 0.775243 | Folr1/Kynu  |

|                                      |           |          |          |          |               |
|--------------------------------------|-----------|----------|----------|----------|---------------|
| GO_MF_mzGO:000178phosphatic 1/690    | 48/23049  | 0.767856 | 0.824765 | 0.777015 | Gas6          |
| GO_MF_mzGO:003159polyubiquitin 1/690 | 48/23049  | 0.767856 | 0.824765 | 0.777015 | Agap3         |
| GO_MF_mzGO:000489cytokine re 2/690   | 93/23049  | 0.771456 | 0.827742 | 0.77982  | Ackr2/IfngR   |
| GO_MF_mzGO:001661oxidoreduc 3/690    | 135/23049 | 0.773192 | 0.828716 | 0.780738 | Akr1d1/Akr1d2 |
| GO_MF_mzGO:001687ligase activ 4/690  | 176/23049 | 0.776099 | 0.830942 | 0.782834 | Dalrd3/Ear1   |
| GO_MF_mzGO:005101actin filame 4/690  | 177/23049 | 0.77984  | 0.834053 | 0.785766 | Ctnna1/Myo10  |
| GO_MF_mzGO:005101protein kin 1/690   | 50/23049  | 0.781576 | 0.835017 | 0.786674 | Rps3          |
| GO_MF_mzGO:000516transformin 1/690   | 51/23049  | 0.788129 | 0.839328 | 0.790735 | Inhba         |
| GO_MF_mzGO:000554calcium-de 1/690    | 51/23049  | 0.788129 | 0.839328 | 0.790735 | Syt16         |
| GO_MF_mzGO:003017pyridoxal p 1/690   | 51/23049  | 0.788129 | 0.839328 | 0.790735 | Kynu          |
| GO_MF_mzGO:007027vitamin B6 1/690    | 52/23049  | 0.794485 | 0.845197 | 0.796265 | Kynu          |
| GO_MF_mzGO:001650pheromon 2/690      | 99/23049  | 0.800545 | 0.849047 | 0.799892 | Vmn1r43/Ambr  |
| GO_MF_mzGO:000452endoribon 1/690     | 53/23049  | 0.800652 | 0.849047 | 0.799892 | Rnase1        |
| GO_MF_mzGO:001683carbon-car 1/690    | 53/23049  | 0.800652 | 0.849047 | 0.799892 | Acmsd         |
| GO_MF_mzGO:009909ligand-gat 2/690    | 101/23049 | 0.809487 | 0.857507 | 0.807862 | Kcnj14/Tpcc   |
| GO_MF_mzGO:190293phosphatic 2/690    | 102/23049 | 0.813822 | 0.861187 | 0.811329 | Kif16b/Phlc   |
| GO_MF_mzGO:003525nuclear ho 3/690    | 146/23049 | 0.816577 | 0.862936 | 0.812977 | Grm1/Trip1    |
| GO_MF_mzGO:000551calmodulin 4/690    | 188/23049 | 0.817778 | 0.862936 | 0.812977 | Camk1g/Slt    |
| GO_MF_mzGO:001666oxidoreduc 1/690    | 56/23049  | 0.818064 | 0.862936 | 0.812977 | Srxn1         |
| GO_MF_mzGO:001641N-acyltran 2/690    | 105/23049 | 0.826304 | 0.87071  | 0.8203   | Nat8f1/Nat    |
| GO_MF_mzGO:004302ribosome t 1/690    | 58/23049  | 0.82882  | 0.872442 | 0.821932 | Gemin5        |
| GO_MF_mzGO:000508guanyl-nuc 4/690    | 192/23049 | 0.830173 | 0.872948 | 0.822409 | Itsn1/Ralgp   |
| GO_MF_mzGO:003525glutamate 1/690     | 60/23049  | 0.838941 | 0.880315 | 0.82935  | Myl12a        |
| GO_MF_mzGO:004216neurotrans 1/690    | 60/23049  | 0.838941 | 0.880315 | 0.82935  | Htr2c         |
| GO_MF_mzGO:001640acetyltran 2/690    | 109/23049 | 0.841773 | 0.882362 | 0.831278 | Nat8f1/Nat    |
| GO_MF_mzGO:000472protein ser 1/690   | 61/23049  | 0.843775 | 0.882609 | 0.831511 | Lck           |
| GO_MF_mzGO:000508protein kin 1/690   | 61/23049  | 0.843775 | 0.882609 | 0.831511 | Dsp           |
| GO_MF_mzGO:001676transferase 1/690   | 63/23049  | 0.853012 | 0.89134  | 0.839736 | Gstm6         |
| GO_MF_mzGO:003037ligand-dep 1/690    | 64/23049  | 0.857425 | 0.895015 | 0.843199 | Vdr           |
| GO_MF_mzGO:000166G-protein 6/690     | 286/23049 | 0.860549 | 0.89734  | 0.845388 | Defb33/De     |
| GO_MF_mzGO:004313ubiquitin b 1/690   | 67/23049  | 0.869884 | 0.906129 | 0.853669 | Uchl3         |
| GO_MF_mzGO:000372RNA helica 1/690    | 68/23049  | 0.87379  | 0.907363 | 0.854831 | Ythdc2        |
| GO_MF_mzGO:000400ATP-deper 1/690     | 68/23049  | 0.87379  | 0.907363 | 0.854831 | Ythdc2        |
| GO_MF_mzGO:001702myosin bin 1/690    | 68/23049  | 0.87379  | 0.907363 | 0.854831 | Npc1l1        |
| GO_MF_mzGO:000486serine-typ 2/690    | 119/23049 | 0.875124 | 0.907805 | 0.855248 | Pzp/Serp      |
| GO_MF_mzGO:001674transferase 5/690   | 252/23049 | 0.8763   | 0.908083 | 0.85551  | Nat8f1/Lip    |
| GO_MF_mzGO:000818RNA-depe 1/690      | 69/23049  | 0.87758  | 0.908468 | 0.855872 | Ythdc2        |
| GO_MF_mzGO:003140carboxylic 4/690    | 214/23049 | 0.886387 | 0.916636 | 0.863568 | Folr1/Grhp    |
| GO_MF_mzGO:000554phosphatic 1/690    | 73/23049  | 0.891635 | 0.920426 | 0.867138 | Phlda3        |
| GO_MF_mzGO:005142hormone r 3/690     | 172/23049 | 0.891893 | 0.920426 | 0.867138 | Grm1/Trip1    |
| GO_MF_mzGO:000525chloride ch 1/690   | 74/23049  | 0.894889 | 0.922378 | 0.868978 | Slc1a4        |
| GO_MF_mzGO:000371transcriptic 10/690 | 467/23049 | 0.895629 | 0.922378 | 0.868978 | Bcl10/Cdyl    |
| GO_MF_mzGO:004317organic aci 4/690   | 219/23049 | 0.896637 | 0.922466 | 0.86906  | Folr1/Grhp    |
| GO_MF_mzGO:003329monocarb 1/690      | 75/23049  | 0.898046 | 0.922966 | 0.869531 | Vdr           |
| GO_MF_mzGO:000823cysteine-ty 3/690   | 182/23049 | 0.912546 | 0.935622 | 0.881454 | Otud6a/Uc     |
| GO_MF_mzGO:001527ligand-gat 2/690    | 134/23049 | 0.913167 | 0.935622 | 0.881454 | Kcnj14/Tpcc   |
| GO_MF_mzGO:002283ligand-gat 2/690    | 134/23049 | 0.913167 | 0.935622 | 0.881454 | Kcnj14/Tpcc   |
| GO_MF_mzGO:001681hydrolase 2/690     | 136/23049 | 0.917329 | 0.938924 | 0.884565 | Aga/Klk1b     |



|                                        |           |          |          |          |             |
|----------------------------------------|-----------|----------|----------|----------|-------------|
| GO_MF_mzGO:003525steroid hor 1/690     | 84/23049  | 0.92252  | 0.943272 | 0.888661 | Grm1        |
| GO_MF_mzGO:001665oxidoreduc 1/690      | 86/23049  | 0.927106 | 0.946026 | 0.891256 | Duox2       |
| GO_MF_mzGO:003218ubiquitin-li 1/690    | 86/23049  | 0.927106 | 0.946026 | 0.891256 | Uchl3       |
| GO_MF_mzGO:00151Cinorganic a2/690      | 142/23049 | 0.928717 | 0.94633  | 0.891542 | Lrrc8c/Slc1 |
| GO_MF_mzGO:00151Cchloride tra 1/690    | 87/23049  | 0.929296 | 0.94633  | 0.891542 | Slc1a4      |
| GO_MF_mzGO:003498immunogl 2/690        | 146/23049 | 0.935468 | 0.948763 | 0.893835 | Ighv9-4/Lc  |
| GO_MF_mzGO:000555pheromon 1/690        | 90/23049  | 0.935481 | 0.948763 | 0.893835 | Vmn1r9      |
| GO_MF_mzGO:005108unfolded p 1/690      | 90/23049  | 0.935481 | 0.948763 | 0.893835 | Srsf10      |
| GO_MF_mzGO:005111ATPase bin 1/690      | 90/23049  | 0.935481 | 0.948763 | 0.893835 | Lck         |
| GO_MF_mzGO:001685isomerase 2/690       | 147/23049 | 0.937058 | 0.949401 | 0.894435 | Gm960/Pp    |
| GO_MF_mzGO:000369single-strai 1/690    | 102/23049 | 0.955267 | 0.96687  | 0.910893 | Purb        |
| GO_MF_mzGO:001674transferase 3/690     | 221/23049 | 0.963146 | 0.973859 | 0.917477 | Nat8f1/Nat  |
| GO_MF_mzGO:000517integrin bir 1/690    | 112/23049 | 0.967039 | 0.976807 | 0.920255 | Tnn         |
| GO_MF_mzGO:003016PDZ domai 1/690       | 118/23049 | 0.972559 | 0.981391 | 0.924574 | Lzts3       |
| GO_MF_mzGO:000417endopeptic 7/690      | 438/23049 | 0.978187 | 0.986017 | 0.928932 | Adam19/A    |
| GO_MF_mzGO:000425serine-type 2/690     | 191/23049 | 0.979587 | 0.986017 | 0.928932 | F12/Klk1b1  |
| GO_MF_mzGO:000484ubiquitin-f 7/690     | 443/23049 | 0.980101 | 0.986017 | 0.928932 | Anapc2/Ne   |
| GO_MF_mzGO:000371transcripti 3/690     | 262/23049 | 0.985885 | 0.990266 | 0.932934 | Bcl10/Sox1  |
| GO_MF_mzGO:001978ubiquitin-li 7/690    | 463/23049 | 0.986305 | 0.990266 | 0.932934 | Anapc2/Ne   |
| GO_MF_mzGO:000823serine-type 2/690     | 219/23049 | 0.990255 | 0.993235 | 0.935732 | F12/Klk1b1  |
| GO_MF_mzGO:001717serine hydr 2/690     | 224/23049 | 0.991473 | 0.99346  | 0.935944 | F12/Klk1b1  |
| GO_MF_mzGO:000107transcripti 1/690     | 193/23049 | 0.997235 | 0.998234 | 0.940441 | Vdr         |
| GO_MF_mzGO:000554odorant bir 4/690     | 463/23049 | 0.999576 | 0.999576 | 0.941706 | Olf301/Olf  |
| KEGG_Pathmmu0120C Carbon me 28/1025    | 120/8294  | 0.00057  | 0.178866 | 0.175089 | 11532/937   |
| KEGG_Pathmmu0123C Biosynthesi 19/1025  | 78/8294   | 0.002484 | 0.310803 | 0.304239 | 109652/11   |
| KEGG_Pathmmu0064C Propanoate 10/1025   | 31/8294   | 0.003054 | 0.310803 | 0.304239 | 268860/38   |
| KEGG_Pathmmu0041C beta-Alanii 10/1025  | 32/8294   | 0.003959 | 0.310803 | 0.304239 | 268860/56   |
| KEGG_Pathmmu0414C Peroxisom 19/1025    | 84/8294   | 0.005962 | 0.358229 | 0.350663 | 19299/140   |
| KEGG_Pathmmu0035C Tyrosine m 11/1025   | 40/8294   | 0.007525 | 0.358229 | 0.350663 | 11522/115   |
| KEGG_Pathmmu0341C Base excisi 10/1025  | 35/8294   | 0.007986 | 0.358229 | 0.350663 | 14156/168   |
| KEGG_Pathmmu0411C Cell cycle 24/1025   | 123/8294  | 0.014715 | 0.520085 | 0.509101 | 245000/12   |
| KEGG_Pathmmu00561 Glycerolipi 14/1025  | 61/8294   | 0.014907 | 0.520085 | 0.509101 | 67512/678   |
| KEGG_Pathmmu0022C Arginine bi 6/1025   | 19/8294   | 0.022968 | 0.655629 | 0.641782 | 109652/11   |
| KEGG_Pathmmu0121C 2-Oxocarb 6/1025     | 19/8294   | 0.022968 | 0.655629 | 0.641782 | 109652/12   |
| KEGG_Pathmmu0520C MicroRNA 46/1025     | 281/8294  | 0.026691 | 0.668004 | 0.653896 | 18671/124   |
| KEGG_Pathmmu0025C Alanine, as 9/1025   | 37/8294   | 0.03273  | 0.668004 | 0.653896 | 268860/11   |
| KEGG_Pathmmu0433C Notch sign 11/1025   | 49/8294   | 0.033821 | 0.668004 | 0.653896 | 226548/20   |
| KEGG_Pathmmu0520C Chemical c 18/1025   | 94/8294   | 0.037543 | 0.668004 | 0.653896 | 11522/115   |
| KEGG_Pathmmu0028C Valine, leuc 12/1025 | 56/8294   | 0.038124 | 0.668004 | 0.653896 | 268860/56   |
| KEGG_Pathmmu0033C Arginine ar 11/1025  | 50/8294   | 0.038702 | 0.668004 | 0.653896 | 75986/212   |
| KEGG_Pathmmu0065C Butanoate 7/1025     | 27/8294   | 0.041411 | 0.668004 | 0.653896 | 268860/27   |
| KEGG_Pathmmu0059C Arachidoni 17/1025   | 89/8294   | 0.04332  | 0.668004 | 0.653896 | 11684/116   |
| KEGG_Pathmmu04931 Insulin resi 20/1025 | 109/8294  | 0.044059 | 0.668004 | 0.653896 | 12491/208   |
| KEGG_Pathmmu0462C Cytosolic C 13/1025  | 64/8294   | 0.046803 | 0.668004 | 0.653896 | 20303/159   |
| KEGG_Pathmmu0523C Central car 13/1025  | 64/8294   | 0.046803 | 0.668004 | 0.653896 | 14660/168   |
| KEGG_Pathmmu0305C Proteasom 10/1025    | 46/8294   | 0.050971 | 0.695862 | 0.681165 | 15978/191   |
| KEGG_Pathmmu0472C Serotonerg 23/1025   | 132/8294  | 0.054392 | 0.707723 | 0.692776 | 11684/116   |
| KEGG_Pathmmu0516C Human T-c 39/1025    | 246/8294  | 0.059158 | 0.707723 | 0.692776 | 104110/24   |

|                  |               |         |          |          |          |          |           |
|------------------|---------------|---------|----------|----------|----------|----------|-----------|
| KEGG_Pathmmu0472 | Cholinergic   | 20/1025 | 113/8294 | 0.060653 | 0.707723 | 0.692776 | 11423/104 |
| KEGG_Pathmmu0451 | Cell adhesion | 28/1025 | 169/8294 | 0.063301 | 0.707723 | 0.692776 | 54725/125 |
| KEGG_Pathmmu0001 | Glycolysis    | 13/1025 | 67/8294  | 0.06412  | 0.707723 | 0.692776 | 11522/115 |
| KEGG_Pathmmu0412 | Sulfur relay  | 3/1025  | 8/8294   | 0.065363 | 0.707723 | 0.692776 | 17434/221 |
| KEGG_Pathmmu0492 | Glucagon      | 18/1025 | 102/8294 | 0.074045 | 0.753844 | 0.737924 | 12322/208 |
| KEGG_Pathmmu0342 | Nucleotide    | 9/1025  | 43/8294  | 0.076209 | 0.753844 | 0.737924 | 12572/993 |
| KEGG_Pathmmu0047 | D-Glutamine   | 2/1025  | 4/8294   | 0.077194 | 0.753844 | 0.737924 | 217830/14 |
| KEGG_Pathmmu0056 | Glycosylph    | 6/1025  | 25/8294  | 0.079226 | 0.753844 | 0.737924 | 241062/55 |
| KEGG_Pathmmu0437 | Apelin sign   | 23/1025 | 139/8294 | 0.086967 | 0.76628  | 0.750097 | 11475/104 |
| KEGG_Pathmmu0092 | Sulfur met    | 3/1025  | 9/8294   | 0.089297 | 0.76628  | 0.750097 | 23827/211 |
| KEGG_Pathmmu0533 | Allograft re  | 12/1025 | 64/8294  | 0.09038  | 0.76628  | 0.750097 | 12519/697 |
| KEGG_Pathmmu0406 | HIF-1 sign    | 18/1025 | 105/8294 | 0.092375 | 0.76628  | 0.750097 | 12322/125 |
| KEGG_Pathmmu0079 | Folate bios   | 6/1025  | 26/8294  | 0.092735 | 0.76628  | 0.750097 | 67861/116 |
| KEGG_Pathmmu0503 | Morphine      | 16/1025 | 92/8294  | 0.097885 | 0.788101 | 0.771457 | 104110/11 |
| KEGG_Pathmmu0414 | Protein prc   | 26/1025 | 163/8294 | 0.10172  | 0.789155 | 0.772489 | 27061/123 |
| KEGG_Pathmmu0532 | Autoimmu      | 14/1025 | 79/8294  | 0.103269 | 0.789155 | 0.772489 | 12519/124 |
| KEGG_Pathmmu0026 | Glycine, ser  | 8/1025  | 40/8294  | 0.112835 | 0.789155 | 0.772489 | 11754/121 |
| KEGG_Pathmmu0493 | Cushing sy    | 25/1025 | 158/8294 | 0.114514 | 0.789155 | 0.772489 | 104110/23 |
| KEGG_Pathmmu0520 | Viral carcin  | 35/1025 | 231/8294 | 0.115489 | 0.789155 | 0.772489 | 12370/124 |
| KEGG_Pathmmu0517 | Human imr     | 36/1025 | 239/8294 | 0.118733 | 0.789155 | 0.772489 | 108012/24 |
| KEGG_Pathmmu0497 | Gastric acic  | 13/1025 | 74/8294  | 0.119465 | 0.789155 | 0.772489 | 104110/11 |
| KEGG_Pathmmu0401 | Ras signalir  | 35/1025 | 233/8294 | 0.125958 | 0.789155 | 0.772489 | 11352/723 |
| KEGG_Pathmmu0343 | Mismatch r    | 5/1025  | 22/8294  | 0.126398 | 0.789155 | 0.772489 | 17686/185 |
| KEGG_Pathmmu0516 | Human cyt     | 38/1025 | 256/8294 | 0.130094 | 0.789155 | 0.772489 | 104110/12 |
| KEGG_Pathmmu0503 | Cocaine ad    | 9/1025  | 48/8294  | 0.131064 | 0.789155 | 0.772489 | 12568/208 |
| KEGG_Pathmmu0303 | DNA replic    | 7/1025  | 35/8294  | 0.13307  | 0.789155 | 0.772489 | 14156/185 |
| KEGG_Pathmmu0472 | GABAergic     | 15/1025 | 90/8294  | 0.139247 | 0.789155 | 0.772489 | 268860/10 |
| KEGG_Pathmmu0007 | Synthesis a   | 3/1025  | 11/8294  | 0.145834 | 0.789155 | 0.772489 | 71911/697 |
| KEGG_Pathmmu0013 | Ubiquinon     | 13/1025 | 11/8294  | 0.145834 | 0.789155 | 0.772489 | 230027/18 |
| KEGG_Pathmmu0408 | Neuroactiv    | 42/1025 | 289/8294 | 0.146638 | 0.789155 | 0.772489 | 11517/115 |
| KEGG_Pathmmu0516 | Epstein-Ba    | 34/1025 | 230/8294 | 0.15131  | 0.789155 | 0.772489 | 12317/123 |
| KEGG_Pathmmu0472 | Dopaminer     | 21/1025 | 135/8294 | 0.156874 | 0.789155 | 0.772489 | 11865/123 |
| KEGG_Pathmmu0007 | Fatty acid    | 9/1025  | 50/8294  | 0.1576   | 0.789155 | 0.772489 | 14081/115 |
| KEGG_Pathmmu0027 | Cysteine ar   | 9/1025  | 50/8294  | 0.1576   | 0.789155 | 0.772489 | 74340/563 |
| KEGG_Pathmmu0152 | Antifolate    | 6/1025  | 30/8294  | 0.157857 | 0.789155 | 0.772489 | 76408/116 |
| KEGG_Pathmmu0522 | Small cell    | 15/1025 | 92/8294  | 0.158745 | 0.789155 | 0.772489 | 12447/124 |
| KEGG_Pathmmu0121 | Fatty acid    | 10/1025 | 57/8294  | 0.159611 | 0.789155 | 0.772489 | 14081/128 |
| KEGG_Pathmmu0497 | Salivary sec  | 13/1025 | 78/8294  | 0.160534 | 0.789155 | 0.772489 | 104110/11 |
| KEGG_Pathmmu0411 | p53 signal    | 12/1025 | 71/8294  | 0.160847 | 0.789155 | 0.772489 | 71361/245 |
| KEGG_Pathmmu0034 | Histidine     | 5/1025  | 24/8294  | 0.166837 | 0.792292 | 0.775559 | 56847/621 |
| KEGG_Pathmmu0302 | Basal trans   | 8/1025  | 44/8294  | 0.169345 | 0.792292 | 0.775559 | 12572/836 |
| KEGG_Pathmmu0346 | Fanconi an    | 9/1025  | 51/8294  | 0.171771 | 0.792292 | 0.775559 | 245000/12 |
| KEGG_Pathmmu0401 | MAPK sign     | 42/1025 | 294/8294 | 0.174777 | 0.792292 | 0.775559 | 12296/122 |
| KEGG_Pathmmu0520 | Proteoglyc    | 30/1025 | 204/8294 | 0.176624 | 0.792292 | 0.775559 | 12322/123 |
| KEGG_Pathmmu0063 | Glyoxylate    | 6/1025  | 31/8294  | 0.176626 | 0.792292 | 0.775559 | 104174/23 |
| KEGG_Pathmmu0491 | Thyroid ho    | 12/1025 | 73/8294  | 0.18501  | 0.807964 | 0.7909   | 104110/11 |
| KEGG_Pathmmu0098 | Metabolism    | 11/1025 | 66/8294  | 0.186141 | 0.807964 | 0.7909   | 11522/115 |
| KEGG_Pathmmu0541 | Viral myoc    | 14/1025 | 88/8294  | 0.193089 | 0.807964 | 0.7909   | 11352/123 |

|                                       |          |          |          |          |           |
|---------------------------------------|----------|----------|----------|----------|-----------|
| KEGG_Pathmmu00020 Citrate cycl6/1025  | 32/8294  | 0.196244 | 0.807964 | 0.7909   | 269951/67 |
| KEGG_Pathmmu01040 Biosynthesi6/1025   | 32/8294  | 0.196244 | 0.807964 | 0.7909   | 26897/171 |
| KEGG_Pathmmu03450 Non-homoc3/1025     | 13/8294  | 0.210822 | 0.807964 | 0.7909   | 14156/566 |
| KEGG_Pathmmu04210 Cellular ser27/1025 | 186/8294 | 0.211253 | 0.807964 | 0.7909   | 245000/12 |
| KEGG_Pathmmu00980 Drug meta 11/1025   | 68/8294  | 0.21341  | 0.807964 | 0.7909   | 11522/115 |
| KEGG_Pathmmu04620 RIG-I-like r11/1025 | 68/8294  | 0.21341  | 0.807964 | 0.7909   | 12370/159 |
| KEGG_Pathmmu05010 Huntingtor28/1025   | 194/8294 | 0.215126 | 0.807964 | 0.7909   | 11946/280 |
| KEGG_Pathmmu04130 SNARE inte6/1025    | 33/8294  | 0.216627 | 0.807964 | 0.7909   | 67474/562 |
| KEGG_Pathmmu04970 Fat digestic7/1025  | 40/8294  | 0.21854  | 0.807964 | 0.7909   | 67512/124 |
| KEGG_Pathmmu02010 ABC transp8/1025    | 47/8294  | 0.218616 | 0.807964 | 0.7909   | 74591/679 |
| KEGG_Pathmmu03010 RNA degra13/1025    | 83/8294  | 0.220602 | 0.807964 | 0.7909   | 12227/788 |
| KEGG_Pathmmu04720 Retrograde22/1025   | 150/8294 | 0.224959 | 0.807964 | 0.7909   | 104110/14 |
| KEGG_Pathmmu04710 Circadian e15/1025  | 98/8294  | 0.225066 | 0.807964 | 0.7909   | 104110/11 |
| KEGG_Pathmmu00530 Glycosamir4/1025    | 20/8294  | 0.228188 | 0.807964 | 0.7909   | 71797/234 |
| KEGG_Pathmmu04210 Longevity r10/1025  | 62/8294  | 0.230874 | 0.807964 | 0.7909   | 104110/20 |
| KEGG_Pathmmu04010 ErbB signal13/1025  | 84/8294  | 0.233635 | 0.807964 | 0.7909   | 11352/123 |
| KEGG_Pathmmu04920 Regulation 9/1025   | 55/8294  | 0.23377  | 0.807964 | 0.7909   | 104110/11 |
| KEGG_Pathmmu00600 Glycosphin5/1025    | 27/8294  | 0.23528  | 0.807964 | 0.7909   | 80908/722 |
| KEGG_Pathmmu03440 Homologo7/1025      | 41/8294  | 0.237619 | 0.807964 | 0.7909   | 12144/107 |
| KEGG_Pathmmu04150 PI3K-Akt si49/1025  | 358/8294 | 0.239301 | 0.807964 | 0.7909   | 12447/124 |
| KEGG_Pathmmu04940 Type I diab11/1025  | 70/8294  | 0.242222 | 0.809123 | 0.792035 | 12519/697 |
| KEGG_Pathmmu00530 Glycosamir3/1025    | 14/8294  | 0.245336 | 0.810901 | 0.793775 | 57370/536 |
| KEGG_Pathmmu04260 Cardiac mu12/1025   | 78/8294  | 0.252018 | 0.813378 | 0.7962   | 11932/122 |
| KEGG_Pathmmu04970 Cholesteros8/1025   | 49/8294  | 0.254098 | 0.813378 | 0.7962   | 30924/124 |
| KEGG_Pathmmu05140 Toxoplasm16/1025    | 108/8294 | 0.256186 | 0.813378 | 0.7962   | 11689/123 |
| KEGG_Pathmmu00530 Glycosamir4/1025    | 21/8294  | 0.256447 | 0.813378 | 0.7962   | 11881/509 |
| KEGG_Pathmmu04810 Regulation 30/1025  | 215/8294 | 0.264161 | 0.829465 | 0.811947 | 54126/129 |
| KEGG_Pathmmu04670 Intestinal ir7/1025 | 43/8294  | 0.27725  | 0.839257 | 0.821532 | 56838/125 |
| KEGG_Pathmmu05330 Graft-vers10/1025   | 65/8294  | 0.27851  | 0.839257 | 0.821532 | 12519/697 |
| KEGG_Pathmmu00510 Other type4/1025    | 22/8294  | 0.285347 | 0.839257 | 0.821532 | 57370/108 |
| KEGG_Pathmmu04970 Pancreatic 15/1025  | 103/8294 | 0.287841 | 0.839257 | 0.821532 | 104110/54 |
| KEGG_Pathmmu04360 Axon guid25/1025    | 180/8294 | 0.295863 | 0.839257 | 0.821532 | 12322/125 |
| KEGG_Pathmmu04340 Hedgehog7/1025      | 44/8294  | 0.297664 | 0.839257 | 0.821532 | 27373/269 |
| KEGG_Pathmmu00560 Glycerophc14/1025   | 97/8294  | 0.308976 | 0.839257 | 0.821532 | 11423/675 |
| KEGG_Pathmmu04710 Circadian r5/1025   | 30/8294  | 0.309918 | 0.839257 | 0.821532 | 11865/127 |
| KEGG_Pathmmu00360 Phenylalan4/1025    | 23/8294  | 0.31468  | 0.839257 | 0.821532 | 56847/621 |
| KEGG_Pathmmu00900 Terpenoid 4/1025    | 23/8294  | 0.31468  | 0.839257 | 0.821532 | 14272/153 |
| KEGG_Pathmmu00120 Primary bil3/1025   | 16/8294  | 0.316332 | 0.839257 | 0.821532 | 13116/154 |
| KEGG_Pathmmu04910 Progesteros13/1025  | 90/8294  | 0.31736  | 0.839257 | 0.821532 | 104110/12 |
| KEGG_Pathmmu04970 Mineral ab7/1025    | 45/8294  | 0.318385 | 0.839257 | 0.821532 | 11932/177 |
| KEGG_Pathmmu04020 cAMP sign27/1025    | 198/8294 | 0.321114 | 0.839257 | 0.821532 | 104110/11 |
| KEGG_Pathmmu05010 Parkinson c20/1025  | 144/8294 | 0.322713 | 0.839257 | 0.821532 | 11946/280 |
| KEGG_Pathmmu05200 Transcriptic25/1025 | 183/8294 | 0.32634  | 0.839257 | 0.821532 | 12427/125 |
| KEGG_Pathmmu00620 Pyruvate r6/1025    | 38/8294  | 0.326844 | 0.839257 | 0.821532 | 66204/567 |
| KEGG_Pathmmu00780 Biotin met21/1025   | 3/8294   | 0.326853 | 0.839257 | 0.821532 | 110948    |
| KEGG_Pathmmu04610 Antigen pri13/1025  | 91/8294  | 0.332031 | 0.839257 | 0.821532 | 12317/123 |
| KEGG_Pathmmu05160 Herpes sim29/1025   | 215/8294 | 0.335106 | 0.839257 | 0.821532 | 11865/123 |
| KEGG_Pathmmu04070 Sphingolipi17/1025  | 122/8294 | 0.336296 | 0.839257 | 0.821532 | 11539/544 |

|                  |              |         |          |          |          |          |           |
|------------------|--------------|---------|----------|----------|----------|----------|-----------|
| KEGG_Pathmmu0462 | Toll-like re | 14/1025 | 99/8294  | 0.337096 | 0.839257 | 0.821532 | 12370/203 |
| KEGG_Pathmmu0414 | Endocytosi   | 36/1025 | 270/8294 | 0.337504 | 0.839257 | 0.821532 | 11844/211 |
| KEGG_Pathmmu0497 | Vitamin diç  | 4/1025  | 24/8294  | 0.344248 | 0.839257 | 0.821532 | 14603/670 |
| KEGG_Pathmmu0491 | Melanoger    | 14/1025 | 100/8294 | 0.351361 | 0.839257 | 0.821532 | 104110/12 |
| KEGG_Pathmmu0045 | Selenocom    | 3/1025  | 17/8294  | 0.352094 | 0.839257 | 0.821532 | 214580/10 |
| KEGG_Pathmmu0332 | PPAR sign    | 2/1025  | 85/8294  | 0.357249 | 0.839257 | 0.821532 | 14081/124 |
| KEGG_Pathmmu0435 | TGF-beta s   | 12/1025 | 85/8294  | 0.357249 | 0.839257 | 0.821532 | 11705/269 |
| KEGG_Pathmmu0491 | Insulin secr | 12/1025 | 85/8294  | 0.357249 | 0.839257 | 0.821532 | 104110/11 |
| KEGG_Pathmmu0426 | Adrenergic   | 20/1025 | 147/8294 | 0.357904 | 0.839257 | 0.821532 | 104110/11 |
| KEGG_Pathmmu0003 | Pentose ph   | 5/1025  | 32/8294  | 0.361348 | 0.839257 | 0.821532 | 232449/23 |
| KEGG_Pathmmu0006 | Fatty acid   | 5/1025  | 32/8294  | 0.361348 | 0.839257 | 0.821532 | 26897/171 |
| KEGG_Pathmmu0531 | Asthma       | 4/1025  | 25/8294  | 0.373869 | 0.839257 | 0.821532 | 15000/149 |
| KEGG_Pathmmu0492 | Adipocytok   | 10/1025 | 71/8294  | 0.38047  | 0.839257 | 0.821532 | 14081/684 |
| KEGG_Pathmmu0060 | Sphingolipi  | 7/1025  | 48/8294  | 0.3817   | 0.839257 | 0.821532 | 66190/544 |
| KEGG_Pathmmu0050 | Starch and   | 5/1025  | 33/8294  | 0.387191 | 0.839257 | 0.821532 | 14378/149 |
| KEGG_Pathmmu0077 | Pantothen    | 3/1025  | 18/8294  | 0.38762  | 0.839257 | 0.821532 | 12036/995 |
| KEGG_Pathmmu0465 | Th1 and Th   | 12/1025 | 87/8294  | 0.388683 | 0.839257 | 0.821532 | 54485/150 |
| KEGG_Pathmmu0464 | Hematopo     | 13/1025 | 95/8294  | 0.391917 | 0.839257 | 0.821532 | 12478/124 |
| KEGG_Pathmmu0522 | Gastric can  | 20/1025 | 150/8294 | 0.393816 | 0.839257 | 0.821532 | 18671/124 |
| KEGG_Pathmmu0521 | Bladder car  | 6/1025  | 41/8294  | 0.396302 | 0.839257 | 0.821532 | 12550/125 |
| KEGG_Pathmmu0521 | Melanoma     | 10/1025 | 72/8294  | 0.397907 | 0.839257 | 0.821532 | 12550/125 |
| KEGG_Pathmmu0152 | EGFR tyros   | 11/1025 | 80/8294  | 0.40148  | 0.839257 | 0.821532 | 13684/138 |
| KEGG_Pathmmu0051 | N-Glycan     | 17/1025 | 49/8294  | 0.402967 | 0.839257 | 0.821532 | 320438/57 |
| KEGG_Pathmmu0514 | Malaria      | 7/1025  | 49/8294  | 0.402967 | 0.839257 | 0.821532 | 12491/129 |
| KEGG_Pathmmu0439 | Hippo sign   | 4/1025  | 26/8294  | 0.403372 | 0.839257 | 0.821532 | 27373/167 |
| KEGG_Pathmmu0471 | Thermoger    | 30/1025 | 230/8294 | 0.404603 | 0.839257 | 0.821532 | 14081/104 |
| KEGG_Pathmmu0029 | Valine, leuc | 1/1025  | 4/8294   | 0.410073 | 0.839257 | 0.821532 | 12036     |
| KEGG_Pathmmu0004 | Pentose an   | 5/1025  | 34/8294  | 0.412968 | 0.839257 | 0.821532 | 67861/666 |
| KEGG_Pathmmu0502 | Prion disea  | 5/1025  | 34/8294  | 0.412968 | 0.839257 | 0.821532 | 109828/19 |
| KEGG_Pathmmu0516 | Measles      | 18/1025 | 136/8294 | 0.415757 | 0.839257 | 0.821532 | 12447/124 |
| KEGG_Pathmmu0516 | Hepatitis C  | 21/1025 | 160/8294 | 0.418952 | 0.839257 | 0.821532 | 12370/125 |
| KEGG_Pathmmu0516 | Influenza A  | 22/1025 | 168/8294 | 0.419807 | 0.839257 | 0.821532 | 54188/159 |
| KEGG_Pathmmu0541 | Dilated car  | 12/1025 | 89/8294  | 0.420335 | 0.839257 | 0.821532 | 104110/12 |
| KEGG_Pathmmu0406 | Chemokine    | 26/1025 | 200/8294 | 0.422482 | 0.839257 | 0.821532 | 104110/12 |
| KEGG_Pathmmu0513 | Legionello   | 8/1025  | 58/8294  | 0.427792 | 0.839257 | 0.821532 | 12176/123 |
| KEGG_Pathmmu0516 | Kaposi sarc  | 28/1025 | 217/8294 | 0.433697 | 0.839257 | 0.821532 | 12370/127 |
| KEGG_Pathmmu0514 | Amoebiasis   | 14/1025 | 106/8294 | 0.4385   | 0.839257 | 0.821532 | 11846/128 |
| KEGG_Pathmmu0005 | Fructose ar  | 5/1025  | 35/8294  | 0.438574 | 0.839257 | 0.821532 | 67861/186 |
| KEGG_Pathmmu0472 | Glutamater   | 15/1025 | 114/8294 | 0.4394   | 0.839257 | 0.821532 | 104110/14 |
| KEGG_Pathmmu0496 | Vasopressi   | 6/1025  | 43/8294  | 0.442548 | 0.839257 | 0.821532 | 11857/208 |
| KEGG_Pathmmu0532 | Inflammatc   | 8/1025  | 59/8294  | 0.447452 | 0.839257 | 0.821532 | 15000/149 |
| KEGG_Pathmmu0514 | Leishmania   | 9/1025  | 67/8294  | 0.449036 | 0.839257 | 0.821532 | 15000/149 |
| KEGG_Pathmmu0491 | Thyroid ho   | 15/1025 | 115/8294 | 0.453477 | 0.839257 | 0.821532 | 11932/133 |
| KEGG_Pathmmu0492 | Relaxin sig  | 17/1025 | 131/8294 | 0.454016 | 0.839257 | 0.821532 | 11475/104 |
| KEGG_Pathmmu0402 | Calcium sig  | 24/1025 | 187/8294 | 0.454459 | 0.839257 | 0.821532 | 104110/11 |
| KEGG_Pathmmu0514 | African try  | 5/1025  | 36/8294  | 0.463914 | 0.839257 | 0.821532 | 100503605 |
| KEGG_Pathmmu0534 | Primary im   | 5/1025  | 36/8294  | 0.463914 | 0.839257 | 0.821532 | 12478/161 |
| KEGG_Pathmmu0501 | Amyotroph    | 7/1025  | 52/8294  | 0.466385 | 0.839257 | 0.821532 | 14775/147 |

|                                      |          |          |          |          |           |
|--------------------------------------|----------|----------|----------|----------|-----------|
| KEGG_Pathmmu05031Amphetam9/1025      | 68/8294  | 0.467392 | 0.839257 | 0.821532 | 12322/208 |
| KEGG_Pathmmu05211Renal cell c9/1025  | 68/8294  | 0.467392 | 0.839257 | 0.821532 | 12575/717 |
| KEGG_Pathmmu04112Oocyte me15/1025    | 116/8294 | 0.467526 | 0.839257 | 0.821532 | 104110/12 |
| KEGG_Pathmmu05133Pertussis 10/1025   | 76/8294  | 0.467623 | 0.839257 | 0.821532 | 12631/146 |
| KEGG_Pathmmu05220Chronic my10/1025   | 76/8294  | 0.467623 | 0.839257 | 0.821532 | 110279/12 |
| KEGG_Pathmmu05410Hypertroph11/1025   | 84/8294  | 0.467739 | 0.839257 | 0.821532 | 12296/122 |
| KEGG_Pathmmu01522Platinum d10/1025   | 77/8294  | 0.484881 | 0.865071 | 0.846801 | 11979/123 |
| KEGG_Pathmmu04152AMPK sign16/1025    | 126/8294 | 0.494419 | 0.873056 | 0.854617 | 68465/124 |
| KEGG_Pathmmu04668TNF signali14/1025  | 110/8294 | 0.496594 | 0.873056 | 0.854617 | 12370/202 |
| KEGG_Pathmmu05168Human pa145/1025    | 361/8294 | 0.499912 | 0.873056 | 0.854617 | 11984/245 |
| KEGG_Pathmmu04540Gap junctio11/1025  | 86/8294  | 0.500478 | 0.873056 | 0.854617 | 104110/12 |
| KEGG_Pathmmu03020RNA polyn4/1025     | 30/8294  | 0.517392 | 0.897576 | 0.878619 | 69833/664 |
| KEGG_Pathmmu04976Bile secreti9/1025  | 71/8294  | 0.521593 | 0.89801  | 0.879045 | 18671/764 |
| KEGG_Pathmmu04217Necroptosi22/1025   | 177/8294 | 0.523363 | 0.89801  | 0.879045 | 26926/123 |
| KEGG_Pathmmu00061Fatty acid t2/1025  | 14/8294  | 0.531021 | 0.903447 | 0.884367 | 14081/141 |
| KEGG_Pathmmu00568Ether lipid 6/1025  | 47/8294  | 0.532286 | 0.903447 | 0.884367 | 18606/990 |
| KEGG_Pathmmu05412Arrhythmo9/1025     | 72/8294  | 0.539263 | 0.903895 | 0.884805 | 12296/122 |
| KEGG_Pathmmu00480Glutathion8/1025    | 64/8294  | 0.543299 | 0.903895 | 0.884805 | 14630/147 |
| KEGG_Pathmmu05218Prostate ca12/1025  | 97/8294  | 0.545132 | 0.903895 | 0.884805 | 12447/124 |
| KEGG_Pathmmu00232Caffeine m1/1025    | 6/8294   | 0.546943 | 0.903895 | 0.884805 | 17961     |
| KEGG_Pathmmu00440Phosphon2/1025      | 6/8294   | 0.546943 | 0.903895 | 0.884805 | 68671     |
| KEGG_Pathmmu00518Mannose t3/1025     | 23/8294  | 0.553976 | 0.904526 | 0.885423 | 57370/215 |
| KEGG_Pathmmu04072Phospholip18/1025   | 147/8294 | 0.555503 | 0.904526 | 0.885423 | 104110/67 |
| KEGG_Pathmmu04211Longevity r11/1025  | 90/8294  | 0.564169 | 0.904526 | 0.885423 | 104110/68 |
| KEGG_Pathmmu04148Phagosom22/1025     | 181/8294 | 0.568131 | 0.904526 | 0.885423 | 11984/123 |
| KEGG_Pathmmu00730Thiamine n2/1025    | 15/8294  | 0.569542 | 0.904526 | 0.885423 | 11647/665 |
| KEGG_Pathmmu04910Insulin sign17/1025 | 140/8294 | 0.570251 | 0.904526 | 0.885423 | 13684/141 |
| KEGG_Pathmmu00052Galactose r4/1025   | 32/8294  | 0.570472 | 0.904526 | 0.885423 | 67861/143 |
| KEGG_Pathmmu04138Autophagy4/1025     | 32/8294  | 0.570472 | 0.904526 | 0.885423 | 66795/329 |
| KEGG_Pathmmu04630JAK-STAT 20/1025    | 165/8294 | 0.573386 | 0.904526 | 0.885423 | 12575/128 |
| KEGG_Pathmmu04218Ferroptosis5/1025   | 41/8294  | 0.583869 | 0.904526 | 0.885423 | 14081/146 |
| KEGG_Pathmmu00532Glycosamir3/1025    | 24/8294  | 0.583937 | 0.904526 | 0.885423 | 54616/507 |
| KEGG_Pathmmu04512ECM-recep10/1025    | 83/8294  | 0.584773 | 0.904526 | 0.885423 | 12491/128 |
| KEGG_Pathmmu05328Rheumatoi10/1025    | 83/8294  | 0.584773 | 0.904526 | 0.885423 | 11984/202 |
| KEGG_Pathmmu00591Linoleic aci6/1025  | 50/8294  | 0.595385 | 0.91639  | 0.897036 | 13096/226 |
| KEGG_Pathmmu00190Oxidative r16/1025  | 134/8294 | 0.598808 | 0.91639  | 0.897036 | 11946/280 |
| KEGG_Pathmmu00310Lysine deg17/1025   | 59/8294  | 0.60561  | 0.91639  | 0.897036 | 56752/937 |
| KEGG_Pathmmu05161Hepatitis B17/1025  | 143/8294 | 0.607036 | 0.91639  | 0.897036 | 12370/124 |
| KEGG_Pathmmu05418Fluid shear17/1025  | 143/8294 | 0.607036 | 0.91639  | 0.897036 | 12389/123 |
| KEGG_Pathmmu00592alpha-Lino3/1025    | 25/8294  | 0.612583 | 0.92034  | 0.900903 | 56473/663 |
| KEGG_Pathmmu00230Purine met16/1025   | 136/8294 | 0.623467 | 0.932116 | 0.91243  | 104110/11 |
| KEGG_Pathmmu04921Oxytocin si18/1025  | 153/8294 | 0.626358 | 0.932116 | 0.91243  | 104110/12 |
| KEGG_Pathmmu04060Cytokine-c35/1025   | 296/8294 | 0.639038 | 0.932904 | 0.913201 | 11705/110 |
| KEGG_Pathmmu05132Salmonella9/1025    | 78/8294  | 0.639238 | 0.932904 | 0.913201 | 20303/286 |
| KEGG_Pathmmu04628C-type lect13/1025  | 112/8294 | 0.639377 | 0.932904 | 0.913201 | 12370/202 |
| KEGG_Pathmmu04270Vascular sn15/1025  | 129/8294 | 0.640669 | 0.932904 | 0.913201 | 11475/104 |
| KEGG_Pathmmu04730Long-term7/1025     | 61/8294  | 0.641743 | 0.932904 | 0.913201 | 666513/14 |
| KEGG_Pathmmu04668Fc gamma10/1025     | 87/8294  | 0.646219 | 0.935082 | 0.915333 | 211914/12 |

|                  |                      |          |          |          |          |           |
|------------------|----------------------|----------|----------|----------|----------|-----------|
| KEGG_Pathmmu0040 | Phenylalan 1/1025    | 8/8294   | 0.652081 | 0.935993 | 0.916225 | 14718     |
| KEGG_Pathmmu0414 | Autophagy 15/1025    | 130/8294 | 0.65281  | 0.935993 | 0.916225 | 66795/329 |
| KEGG_Pathmmu0005 | Ascorbate 3/1025     | 27/8294  | 0.66578  | 0.938422 | 0.918603 | 56752/222 |
| KEGG_Pathmmu0014 | Steroid hor 10/1025  | 89/8294  | 0.674984 | 0.938422 | 0.918603 | 13088/130 |
| KEGG_Pathmmu0413 | Mitophagy 7/1025     | 63/8294  | 0.675879 | 0.938422 | 0.918603 | 12176/135 |
| KEGG_Pathmmu0521 | Basal cell c 7/1025  | 63/8294  | 0.675879 | 0.938422 | 0.918603 | 12575/165 |
| KEGG_Pathmmu0467 | Leukocyte 13/1025    | 115/8294 | 0.677631 | 0.938422 | 0.918603 | 12927/127 |
| KEGG_Pathmmu0401 | Rap1 signa 24/1025   | 209/8294 | 0.683036 | 0.938422 | 0.918603 | 104110/12 |
| KEGG_Pathmmu0453 | Tight juncti 19/1025 | 167/8294 | 0.686569 | 0.938422 | 0.918603 | 102098/70 |
| KEGG_Pathmmu0521 | Thyroid car 4/1025   | 37/8294  | 0.687471 | 0.938422 | 0.918603 | 12550/125 |
| KEGG_Pathmmu0038 | Tryptophar 5/1025    | 46/8294  | 0.687715 | 0.938422 | 0.918603 | 56752/765 |
| KEGG_Pathmmu0304 | Spliceosom 15/1025   | 133/8294 | 0.6879   | 0.938422 | 0.918603 | 15381/193 |
| KEGG_Pathmmu0497 | Protein dig 10/1025  | 90/8294  | 0.688836 | 0.938422 | 0.918603 | 11932/128 |
| KEGG_Pathmmu0493 | Non-alcoh 17/1025    | 151/8294 | 0.697523 | 0.938422 | 0.918603 | 68465/123 |
| KEGG_Pathmmu0010 | Steroid bio 2/1025   | 19/8294  | 0.70024  | 0.938422 | 0.918603 | 13081/141 |
| KEGG_Pathmmu0067 | One carboi 2/1025    | 19/8294  | 0.70024  | 0.938422 | 0.918603 | 270685/20 |
| KEGG_Pathmmu0083 | Retinol me 10/1025   | 91/8294  | 0.702322 | 0.938422 | 0.918603 | 11522/115 |
| KEGG_Pathmmu0465 | IL-17 signa 10/1025  | 91/8294  | 0.702322 | 0.938422 | 0.918603 | 12370/202 |
| KEGG_Pathmmu0515 | Staphyloco 6/1025    | 56/8294  | 0.706486 | 0.939761 | 0.919914 | 11537/142 |
| KEGG_Pathmmu0510 | Bacterial in 8/1025  | 74/8294  | 0.710025 | 0.939761 | 0.919914 | 12927/123 |
| KEGG_Pathmmu0514 | Chagas dis 11/1025   | 101/8294 | 0.718469 | 0.939761 | 0.919914 | 12317/123 |
| KEGG_Pathmmu0421 | Apoptosis 15/1025    | 136/8294 | 0.72086  | 0.939761 | 0.919914 | 26926/123 |
| KEGG_Pathmmu0491 | Ovarian ste 6/1025   | 57/8294  | 0.72282  | 0.939761 | 0.919914 | 104110/11 |
| KEGG_Pathmmu0521 | Pancreatic 8/1025    | 75/8294  | 0.724274 | 0.939761 | 0.919914 | 12575/135 |
| KEGG_Pathmmu0521 | Glioma 8/1025        | 75/8294  | 0.724274 | 0.939761 | 0.919914 | 12322/125 |
| KEGG_Pathmmu0152 | Endocrine 10/1025    | 93/8294  | 0.728175 | 0.940935 | 0.921062 | 104110/12 |
| KEGG_Pathmmu0522 | Breast canc 16/1025  | 147/8294 | 0.744488 | 0.955798 | 0.935612 | 12575/544 |
| KEGG_Pathmmu0503 | Nicotine ac 4/1025   | 40/8294  | 0.745914 | 0.955798 | 0.935612 | 14399/144 |
| KEGG_Pathmmu0466 | Fc epsilon 17/1025   | 68/8294  | 0.751854 | 0.955798 | 0.935612 | 11689/666 |
| KEGG_Pathmmu0492 | Cortisol syr 7/1025  | 68/8294  | 0.751854 | 0.955798 | 0.935612 | 104110/20 |
| KEGG_Pathmmu0501 | Alzheimer 19/1025    | 175/8294 | 0.761948 | 0.961349 | 0.941045 | 226548/20 |
| KEGG_Pathmmu0098 | Drug meta 9/1025     | 87/8294  | 0.763799 | 0.961349 | 0.941045 | 13106/995 |
| KEGG_Pathmmu0522 | Acute myel 7/1025    | 69/8294  | 0.765405 | 0.961349 | 0.941045 | 12427/110 |
| KEGG_Pathmmu0421 | Apoptosis 3/1025     | 32/8294  | 0.774841 | 0.963943 | 0.943585 | 51800/123 |
| KEGG_Pathmmu0496 | Proximal tu 2/1025   | 22/8294  | 0.775149 | 0.963943 | 0.943585 | 11932/146 |
| KEGG_Pathmmu0462 | NOD-like r 18/1025   | 168/8294 | 0.77668  | 0.963943 | 0.943585 | 226691/69 |
| KEGG_Pathmmu0492 | Parathyroic 11/1025  | 107/8294 | 0.785979 | 0.971643 | 0.951123 | 104110/12 |
| KEGG_Pathmmu0523 | Choline me 10/1025   | 99/8294  | 0.796566 | 0.980869 | 0.960154 | 380921/11 |
| KEGG_Pathmmu0492 | Aldosteron 10/1025   | 100/8294 | 0.806628 | 0.98229  | 0.961545 | 104110/11 |
| KEGG_Pathmmu0439 | Hippo sign 16/1025   | 154/8294 | 0.806818 | 0.98229  | 0.961545 | 11705/125 |
| KEGG_Pathmmu0466 | T cell rece 10/1025  | 101/8294 | 0.816316 | 0.98229  | 0.961545 | 12477/159 |
| KEGG_Pathmmu0076 | Nicotinate 3/1025    | 36/8294  | 0.839464 | 0.98229  | 0.961545 | 69564/230 |
| KEGG_Pathmmu0097 | Aminoacyl 6/1025     | 66/8294  | 0.841399 | 0.98229  | 0.961545 | 85305/214 |
| KEGG_Pathmmu0522 | Non-small 6/1025     | 66/8294  | 0.841399 | 0.98229  | 0.961545 | 12575/135 |
| KEGG_Pathmmu0402 | cGMP-PKC 17/1025     | 168/8294 | 0.844038 | 0.98229  | 0.961545 | 104110/11 |
| KEGG_Pathmmu0515 | Tuberculos 18/1025   | 178/8294 | 0.850577 | 0.98229  | 0.961545 | 11984/123 |
| KEGG_Pathmmu0431 | Wnt signali 16/1025  | 160/8294 | 0.850898 | 0.98229  | 0.961545 | 12322/273 |
| KEGG_Pathmmu0301 | mRNA surv 9/1025     | 96/8294  | 0.854514 | 0.98229  | 0.961545 | 51786/541 |

|                   |              |         |          |          |          |          |           |
|-------------------|--------------|---------|----------|----------|----------|----------|-----------|
| KEGG_Pathmmu04142 | Lysosome     | 12/1025 | 124/8294 | 0.854775 | 0.98229  | 0.961545 | 108012/10 |
| KEGG_Pathmmu04611 | Platelet act | 12/1025 | 124/8294 | 0.854775 | 0.98229  | 0.961545 | 104110/66 |
| KEGG_Pathmmu0024  | Pyrimidine   | 5/1025  | 58/8294  | 0.859991 | 0.98229  | 0.961545 | 99586/647 |
| KEGG_Pathmmu0437  | VEGF signa   | 5/1025  | 58/8294  | 0.859991 | 0.98229  | 0.961545 | 26415/187 |
| KEGG_Pathmmu0475  | Inflammatc   | 12/1025 | 125/8294 | 0.861982 | 0.98229  | 0.961545 | 104110/11 |
| KEGG_Pathmmu0522  | Hepatocell   | 17/1025 | 171/8294 | 0.863196 | 0.98229  | 0.961545 | 12575/135 |
| KEGG_Pathmmu0474  | Phototrans   | 2/1025  | 27/8294  | 0.863943 | 0.98229  | 0.961545 | 14913/196 |
| KEGG_Pathmmu0495  | Maturity or  | 2/1025  | 27/8294  | 0.863943 | 0.98229  | 0.961545 | 15376/153 |
| KEGG_Pathmmu0496  | Collecting   | 2/1025  | 27/8294  | 0.863943 | 0.98229  | 0.961545 | 11984/270 |
| KEGG_Pathmmu0496  | Aldosteron   | 3/1025  | 38/8294  | 0.865298 | 0.98229  | 0.961545 | 11932/187 |
| KEGG_Pathmmu0474  | Taste trans  | 8/1025  | 88/8294  | 0.866811 | 0.98229  | 0.961545 | 104110/12 |
| KEGG_Pathmmu0451  | Focal adhe   | 20/1025 | 199/8294 | 0.868273 | 0.98229  | 0.961545 | 12927/123 |
| KEGG_Pathmmu0052  | Amino sug    | 4/1025  | 49/8294  | 0.871437 | 0.98229  | 0.961545 | 14584/109 |
| KEGG_Pathmmu0051  | Mucin type   | 2/1025  | 28/8294  | 0.8773   | 0.98229  | 0.961545 | 14537/204 |
| KEGG_Pathmmu0455  | Signaling p  | 13/1025 | 137/8294 | 0.879827 | 0.98229  | 0.961545 | 26380/154 |
| KEGG_Pathmmu0412  | Ubiquitin n  | 13/1025 | 139/8294 | 0.891582 | 0.98229  | 0.961545 | 107995/52 |
| KEGG_Pathmmu0091  | Nitrogen n   | 1/1025  | 17/8294  | 0.894056 | 0.98229  | 0.961545 | 80733     |
| KEGG_Pathmmu0452  | Adherens j   | 6/1025  | 72/8294  | 0.894797 | 0.98229  | 0.961545 | 12550/192 |
| KEGG_Pathmmu0491  | Prolactin si | 6/1025  | 72/8294  | 0.894797 | 0.98229  | 0.961545 | 16866/264 |
| KEGG_Pathmmu0472  | Neurotropl   | 11/1025 | 121/8294 | 0.896625 | 0.98229  | 0.961545 | 11857/123 |
| KEGG_Pathmmu0086  | Porphyrin    | 3/1025  | 41/8294  | 0.897185 | 0.98229  | 0.961545 | 226139/77 |
| KEGG_Pathmmu0465  | Th17 cell    | d9/1025 | 102/8294 | 0.897826 | 0.98229  | 0.961545 | 15000/149 |
| KEGG_Pathmmu0406  | FoxO signa   | 12/1025 | 132/8294 | 0.904817 | 0.986501 | 0.965667 | 12176/125 |
| KEGG_Pathmmu0503  | Alcoholism   | 19/1025 | 199/8294 | 0.911868 | 0.987061 | 0.966215 | 208677/66 |
| KEGG_Pathmmu0497  | Carbohydr    | 3/1025  | 43/8294  | 0.914493 | 0.987061 | 0.966215 | 11932/143 |
| KEGG_Pathmmu0496  | Endocrine    | 4/1025  | 54/8294  | 0.91476  | 0.987061 | 0.966215 | 11932/103 |
| KEGG_Pathmmu0472  | Synaptic ve  | 6/1025  | 77/8294  | 0.926777 | 0.989576 | 0.968676 | 11984/103 |
| KEGG_Pathmmu0301  | Ribosome     | 16/1025 | 175/8294 | 0.927448 | 0.989576 | 0.968676 | 14109/107 |
| KEGG_Pathmmu0472  | Long-term    | 5/1025  | 67/8294  | 0.929446 | 0.989576 | 0.968676 | 12322/147 |
| KEGG_Pathmmu0521  | Colorectal   | 7/1025  | 88/8294  | 0.930473 | 0.989576 | 0.968676 | 72993/125 |
| KEGG_Pathmmu0301  | RNA trans    | 15/1025 | 167/8294 | 0.932848 | 0.989576 | 0.968676 | 68969/660 |
| KEGG_Pathmmu0521  | Endometri    | 4/1025  | 58/8294  | 0.93949  | 0.990159 | 0.969247 | 12550/125 |
| KEGG_Pathmmu0491  | GnRH sign    | 7/1025  | 90/8294  | 0.939705 | 0.990159 | 0.969247 | 104110/12 |
| KEGG_Pathmmu0466  | B cell rece  | 5/1025  | 72/8294  | 0.952974 | 0.996849 | 0.975796 | 12478/666 |
| KEGG_Pathmmu0492  | Renin secre  | 5/1025  | 72/8294  | 0.952974 | 0.996849 | 0.975796 | 11517/115 |
| KEGG_Pathmmu0415  | mTOR sign    | 13/1025 | 155/8294 | 0.955634 | 0.996849 | 0.975796 | 13684/216 |
| KEGG_Pathmmu0300  | Ribosome     | 19/1025 | 116/8294 | 0.958753 | 0.996849 | 0.975796 | 434234/21 |
| KEGG_Pathmmu0465  | Natural kill | 9/1025  | 118/8294 | 0.964073 | 0.999073 | 0.977972 | 242517/15 |
| KEGG_Pathmmu0532  | Systemic lu  | 11/1025 | 143/8294 | 0.973372 | 0.999284 | 0.978179 | 109828/12 |
| KEGG_Pathmmu0306  | Protein exp  | 1/1025  | 28/8294  | 0.975277 | 0.999284 | 0.978179 | 1E+08     |
| KEGG_Pathmmu0406  | NF-kappa     | 7/1025  | 104/8294 | 0.979111 | 0.999284 | 0.978179 | 20303/666 |
| KEGG_Pathmmu0438  | Osteoclast   | 9/1025  | 128/8294 | 0.982494 | 0.999284 | 0.978179 | 12311/142 |
| KEGG_Pathmmu0407  | Phosphatic   | 6/1025  | 98/8294  | 0.986435 | 0.999284 | 0.978179 | 380921/11 |
| KEGG_Pathmmu0491  | Estrogen si  | 9/1025  | 133/8294 | 0.987981 | 0.999284 | 0.978179 | 104110/20 |
| KEGG_Pathmmu0461  | Compleme     | 5/1025  | 88/8294  | 0.988335 | 0.999284 | 0.978179 | 109828/11 |
| KEGG_Pathmmu0461  | Renin-angi   | 1/1025  | 36/8294  | 0.991431 | 0.999284 | 0.978179 | 75805     |
| KEGG_Pathmmu0493  | AGE-RAGE     | 5/1025  | 100/8294 | 0.996204 | 0.999284 | 0.978179 | 12827/264 |
| KEGG_Pathmmu0493  | Type II dia  | 1/1025  | 48/8294  | 0.998255 | 0.999284 | 0.978179 | 18710     |

|                                     |          |          |          |          |            |
|-------------------------------------|----------|----------|----------|----------|------------|
| KEGG_Pathmmu00562Inositol phc2/1025 | 73/8294  | 0.999284 | 0.999284 | 0.978179 | 269437/10. |
| KEGG_Pathmmu00072Synthesis a3/178   | 11/8294  | 0.001413 | 0.312176 | 0.312176 | 110460/15. |
| KEGG_Pathmmu0065C Butanoate 3/178   | 27/8294  | 0.019477 | 0.991141 | 0.991141 | 110460/15. |
| KEGG_Pathmmu0063C Glyoxylate 3/178  | 31/8294  | 0.028128 | 0.991141 | 0.991141 | 110460/11. |
| KEGG_Pathmmu0028C Valine, leuc4/178 | 56/8294  | 0.031717 | 0.991141 | 0.991141 | 110460/15. |
| KEGG_Pathmmu01212Fatty acid r4/178  | 57/8294  | 0.033559 | 0.991141 | 0.991141 | 107476/11. |
| KEGG_Pathmmu00061Fatty acid t2/178  | 14/8294  | 0.035188 | 0.991141 | 0.991141 | 107476/50. |
| KEGG_Pathmmu0435C TGF-beta s5/178   | 85/8294  | 0.035616 | 0.991141 | 0.991141 | 68010/121. |
| KEGG_Pathmmu0025C Alanine, as 3/178 | 37/8294  | 0.044318 | 0.991141 | 0.991141 | 11564/697. |
| KEGG_Pathmmu0045C Selenocom2/178    | 17/8294  | 0.050437 | 0.991141 | 0.991141 | 229905/21. |
| KEGG_Pathmmu00511Other glyca2/178   | 18/8294  | 0.05596  | 0.991141 | 0.991141 | 230101/73. |
| KEGG_Pathmmu0086C Porphyrin e3/178  | 41/8294  | 0.057179 | 0.991141 | 0.991141 | 17025/703. |
| KEGG_Pathmmu04141Protein prc7/178   | 163/8294 | 0.061166 | 0.991141 | 0.991141 | 11911/678. |
| KEGG_Pathmmu04142Endocytosi 10/178  | 270/8294 | 0.065121 | 0.991141 | 0.991141 | 71770/106. |
| KEGG_Pathmmu03012RNA trans7/178     | 167/8294 | 0.067823 | 0.991141 | 0.991141 | 230861/21. |
| KEGG_Pathmmu0038C Tryptophar3/178   | 46/8294  | 0.075436 | 0.991141 | 0.991141 | 110460/22. |
| KEGG_Pathmmu04721Synaptic ve4/178   | 77/8294  | 0.083187 | 0.991141 | 0.991141 | 71770/108. |
| KEGG_Pathmmu05202Transcripti7/178   | 183/8294 | 0.098651 | 0.991141 | 0.991141 | 68938/126. |
| KEGG_Pathmmu03008Ribosome l5/178    | 116/8294 | 0.10381  | 0.991141 | 0.991141 | 110816/19. |
| KEGG_Pathmmu0406C Cytokine-c 10/178 | 296/8294 | 0.104086 | 0.991141 | 0.991141 | 12159/129. |
| KEGG_Pathmmu04146Peroxisomc4/178    | 84/8294  | 0.106048 | 0.991141 | 0.991141 | 50790/153. |
| KEGG_Pathmmu04392Hippo sign 2/178   | 26/8294  | 0.106479 | 0.991141 | 0.991141 | 319710/50. |
| KEGG_Pathmmu0465C Natural kill5/178 | 118/8294 | 0.109566 | 0.991141 | 0.991141 | 12981/159. |
| KEGG_Pathmmu00512Mucin type2/178    | 28/8294  | 0.120513 | 0.991141 | 0.991141 | 56336/108. |
| KEGG_Pathmmu0306C Protein ex7/178   | 28/8294  | 0.120513 | 0.991141 | 0.991141 | 66286/140. |
| KEGG_Pathmmu04657IL-17 signa4/178   | 91/8294  | 0.131435 | 0.991141 | 0.991141 | 12981/155. |
| KEGG_Pathmmu0064C Propanoatc2/178   | 31/8294  | 0.142339 | 0.991141 | 0.991141 | 107476/11. |
| KEGG_Pathmmu05162Influenza A6/178   | 168/8294 | 0.152526 | 0.991141 | 0.991141 | 15967/228. |
| KEGG_Pathmmu04137Mitophagy 3/178    | 63/8294  | 0.152749 | 0.991141 | 0.991141 | 11911/179. |
| KEGG_Pathmmu0023C Purine met5/178   | 136/8294 | 0.167839 | 0.991141 | 0.991141 | 11564/688. |
| KEGG_Pathmmu05162Measles 5/178      | 136/8294 | 0.167839 | 0.991141 | 0.991141 | 14694/159. |
| KEGG_Pathmmu0097C Aminoacyl-3/178   | 66/8294  | 0.168336 | 0.991141 | 0.991141 | 107508/66. |
| KEGG_Pathmmu00051Fructose ar2/178   | 35/8294  | 0.172579 | 0.991141 | 0.991141 | 18640/270. |
| KEGG_Pathmmu0062C Pyruvate r2/178   | 38/8294  | 0.195884 | 0.991141 | 0.991141 | 107476/11. |
| KEGG_Pathmmu04928Parathyroic4/178   | 107/8294 | 0.197378 | 0.991141 | 0.991141 | 11911/164. |
| KEGG_Pathmmu0452C Adherens j3/178   | 72/8294  | 0.200775 | 0.991141 | 0.991141 | 227377/19. |
| KEGG_Pathmmu00562Inositol phc3/178  | 73/8294  | 0.206322 | 0.991141 | 0.991141 | 52858/771. |
| KEGG_Pathmmu04072Phospholip5/178    | 147/8294 | 0.208374 | 0.991141 | 0.991141 | 227288/10. |
| KEGG_Pathmmu0043C Taurine an1/178   | 11/8294  | 0.21242  | 0.991141 | 0.991141 | 211488.    |
| KEGG_Pathmmu04216Ferroptosis2/178   | 41/8294  | 0.219552 | 0.991141 | 0.991141 | 50790/130. |
| KEGG_Pathmmu0467C Leukocyte 4/178   | 115/8294 | 0.233541 | 0.991141 | 0.991141 | 13058/192. |
| KEGG_Pathmmu0439C Hippo sign 5/178  | 154/8294 | 0.235693 | 0.991141 | 0.991141 | 12159/319. |
| KEGG_Pathmmu03022Basal trans2/178   | 44/8294  | 0.243445 | 0.991141 | 0.991141 | 14884/997. |
| KEGG_Pathmmu00538Glycosamir 1/178   | 14/8294  | 0.262117 | 0.991141 | 0.991141 | 56773.     |
| KEGG_Pathmmu0332C PPAR signc3/178   | 85/8294  | 0.275065 | 0.991141 | 0.991141 | 50790/162. |
| KEGG_Pathmmu0060C Sphingolip2/178   | 48/8294  | 0.275443 | 0.991141 | 0.991141 | 230101/20. |
| KEGG_Pathmmu0503C Cocaine ad2/178   | 48/8294  | 0.275443 | 0.991141 | 0.991141 | 11911/142. |
| KEGG_Pathmmu0073C Thiamine n1/178   | 15/8294  | 0.27798  | 0.991141 | 0.991141 | 68870.     |



|                                       |          |          |          |          |           |
|---------------------------------------|----------|----------|----------|----------|-----------|
| KEGG_Pathmmu0463(JAK-STAT s5/178      | 165/8294 | 0.280445 | 0.991141 | 0.991141 | 12981/159 |
| KEGG_Pathmmu0051(N-Glycan t2/178      | 49/8294  | 0.283442 | 0.991141 | 0.991141 | 102580/17 |
| KEGG_Pathmmu0052(Amino sug 2/178      | 49/8294  | 0.283442 | 0.991141 | 0.991141 | 266690/23 |
| KEGG_Pathmmu0433(Notch sign 2/178     | 49/8294  | 0.283442 | 0.991141 | 0.991141 | 16848/181 |
| KEGG_Pathmmu0415(AMPK sign 4/178      | 126/8294 | 0.285548 | 0.991141 | 0.991141 | 107476/15 |
| KEGG_Pathmmu00071(Fatty acid c2/178   | 50/8294  | 0.291433 | 0.991141 | 0.991141 | 110460/50 |
| KEGG_Pathmmu0401( Rap1 signa6/178     | 209/8294 | 0.292421 | 0.991141 | 0.991141 | 11602/106 |
| KEGG_Pathmmu0541(Viral myoc:3/178     | 88/8294  | 0.292666 | 0.991141 | 0.991141 | 230861/19 |
| KEGG_Pathmmu04621(NOD-like r5/178     | 168/8294 | 0.292949 | 0.991141 | 0.991141 | 13058/159 |
| KEGG_Pathmmu0091(Nitrogen r1/178      | 17/8294  | 0.308695 | 0.991141 | 0.991141 | 14645     |
| KEGG_Pathmmu0304(C Spliceosom 4/178   | 133/8294 | 0.319502 | 0.991141 | 0.991141 | 71702/680 |
| KEGG_Pathmmu04961(Endocrine :2/178    | 54/8294  | 0.323256 | 0.991141 | 0.991141 | 71770/538 |
| KEGG_Pathmmu04217(Necroptosi5/178     | 177/8294 | 0.330977 | 0.991141 | 0.991141 | 66700/130 |
| KEGG_Pathmmu0010(C Steroid bio1/178   | 19/8294  | 0.338111 | 0.991141 | 0.991141 | 235293    |
| KEGG_Pathmmu0022(C Arginine bi1/178   | 19/8294  | 0.338111 | 0.991141 | 0.991141 | 14645     |
| KEGG_Pathmmu0121(C 2-Oxocarb 1/178    | 19/8294  | 0.338111 | 0.991141 | 0.991141 | 11428     |
| KEGG_Pathmmu0407(C Phosphatic 3/178   | 98/8294  | 0.351658 | 0.991141 | 0.991141 | 52858/771 |
| KEGG_Pathmmu0053( Glycosamir 1/178    | 20/8294  | 0.352348 | 0.991141 | 0.991141 | 59031     |
| KEGG_Pathmmu05161(Hepatitis B 4/178   | 143/8294 | 0.368464 | 0.991141 | 0.991141 | 11911/159 |
| KEGG_Pathmmu0051(Other type 1/178     | 22/8294  | 0.379916 | 0.991141 | 0.991141 | 16848     |
| KEGG_Pathmmu0090(C Terpenoid 1/178    | 23/8294  | 0.393259 | 0.991141 | 0.991141 | 110460    |
| KEGG_Pathmmu0462(C Cytosolic C2/178   | 64/8294  | 0.400878 | 0.991141 | 0.991141 | 15967/228 |
| KEGG_Pathmmu0053( Glycosamir 1/178    | 24/8294  | 0.406317 | 0.991141 | 0.991141 | 54710     |
| KEGG_Pathmmu04977(Vitamin diç 1/178   | 24/8294  | 0.406317 | 0.991141 | 0.991141 | 69698     |
| KEGG_Pathmmu0056(C Glycosylph 1/178   | 25/8294  | 0.419095 | 0.991141 | 0.991141 | 67556     |
| KEGG_Pathmmu0466( TNF signali3/178    | 110/8294 | 0.421628 | 0.991141 | 0.991141 | 11911/129 |
| KEGG_Pathmmu0503(Alcoholism 5/178     | 199/8294 | 0.425065 | 0.991141 | 0.991141 | 11911/142 |
| KEGG_Pathmmu0462( RIG-I-like r2/178   | 68/8294  | 0.430791 | 0.991141 | 0.991141 | 15967/228 |
| KEGG_Pathmmu0466( Fc epsilon l2/178   | 68/8294  | 0.430791 | 0.991141 | 0.991141 | 12981/193 |
| KEGG_Pathmmu05031( Amphetam 2/178     | 68/8294  | 0.430791 | 0.991141 | 0.991141 | 11911/142 |
| KEGG_Pathmmu0079(C Folate bios 1/178  | 26/8294  | 0.4316   | 0.991141 | 0.991141 | 13180     |
| KEGG_Pathmmu05221( Acute myel 2/178   | 69/8294  | 0.438147 | 0.991141 | 0.991141 | 12606/129 |
| KEGG_Pathmmu0495(C Maturity or 1/178  | 27/8294  | 0.443837 | 0.991141 | 0.991141 | 15377     |
| KEGG_Pathmmu0491( Thyroid ho 3/178    | 115/8294 | 0.450087 | 0.991141 | 0.991141 | 12159/181 |
| KEGG_Pathmmu0431(C Wnt signali4/178   | 160/8294 | 0.450924 | 0.991141 | 0.991141 | 68010/234 |
| KEGG_Pathmmu0516(C Hepatitis C 4/178  | 160/8294 | 0.450924 | 0.991141 | 0.991141 | 15967/228 |
| KEGG_Pathmmu0492(C Adipocytoç 2/178   | 71/8294  | 0.452703 | 0.991141 | 0.991141 | 50790/116 |
| KEGG_Pathmmu0510(C Bacterial in 2/178 | 74/8294  | 0.474132 | 0.991141 | 0.991141 | 53860/204 |
| KEGG_Pathmmu0152( Antifolate r1/178   | 30/8294  | 0.478998 | 0.991141 | 0.991141 | 64931     |
| KEGG_Pathmmu0471(C Circadian r1/178   | 30/8294  | 0.478998 | 0.991141 | 0.991141 | 12952     |
| KEGG_Pathmmu0521( Pancreatic 2/178    | 75/8294  | 0.481162 | 0.991141 | 0.991141 | 19354/641 |
| KEGG_Pathmmu0516( Herpes sim 5/178    | 215/8294 | 0.492142 | 0.991141 | 0.991141 | 15967/228 |
| KEGG_Pathmmu0002(C Citrate cycl 1/178 | 32/8294  | 0.501201 | 0.991141 | 0.991141 | 11428     |
| KEGG_Pathmmu0104(C Biosynthesi 1/178  | 32/8294  | 0.501201 | 0.991141 | 0.991141 | 76267     |
| KEGG_Pathmmu0123(C Biosynthesi 2/178  | 78/8294  | 0.501905 | 0.991141 | 0.991141 | 11428/146 |
| KEGG_Pathmmu0413(C SNARE inte 1/178   | 33/8294  | 0.511948 | 0.991141 | 0.991141 | 22319     |
| KEGG_Pathmmu0004(C Pentose an 1/178   | 34/8294  | 0.522464 | 0.991141 | 0.991141 | 102448    |
| KEGG_Pathmmu0301( RNA degra 2/178     | 83/8294  | 0.535276 | 0.991141 | 0.991141 | 227715/24 |

|                   |                               |        |          |          |          |          |           |
|-------------------|-------------------------------|--------|----------|----------|----------|----------|-----------|
| KEGG_Pathmmu04512 | ECM-recept                    | 2/178  | 83/8294  | 0.535276 | 0.991141 | 0.991141 | 11603/128 |
| KEGG_Pathmmu05323 | Rheumatoi                     | 2/178  | 83/8294  | 0.535276 | 0.991141 | 0.991141 | 108664/12 |
| KEGG_Pathmmu05143 | African trypan                | 1/178  | 36/8294  | 0.542825 | 0.991141 | 0.991141 | 20339     |
| KEGG_Pathmmu04145 | Phagosome                     | 4/178  | 181/8294 | 0.547508 | 0.991141 | 0.991141 | 108664/13 |
| KEGG_Pathmmu04712 | Thermogener                   | 5/178  | 230/8294 | 0.552343 | 0.991141 | 0.991141 | 50790/837 |
| KEGG_Pathmmu05163 | Epstein-Barr                  | 5/178  | 230/8294 | 0.552343 | 0.991141 | 0.991141 | 15967/228 |
| KEGG_Pathmmu04658 | Th1 and Th2                   | 2/178  | 87/8294  | 0.560855 | 0.991141 | 0.991141 | 16161/181 |
| KEGG_Pathmmu05206 | MicroRNAs                     | 6/178  | 281/8294 | 0.563831 | 0.991141 | 0.991141 | 723953/75 |
| KEGG_Pathmmu04012 | Ras signaling                 | 5/178  | 233/8294 | 0.563975 | 0.991141 | 0.991141 | 11602/546 |
| KEGG_Pathmmu04610 | Complement                    | 2/178  | 88/8294  | 0.567092 | 0.991141 | 0.991141 | 18792/207 |
| KEGG_Pathmmu05210 | Colorectal                    | 2/178  | 88/8294  | 0.567092 | 0.991141 | 0.991141 | 19354/641 |
| KEGG_Pathmmu04550 | Signaling pathway             | 3/178  | 137/8294 | 0.567379 | 0.991141 | 0.991141 | 12159/159 |
| KEGG_Pathmmu04120 | Ubiquitin                     | 3/178  | 139/8294 | 0.577274 | 0.991141 | 0.991141 | 26374/562 |
| KEGG_Pathmmu04912 | GnRH signaling                | 2/178  | 90/8294  | 0.579375 | 0.991141 | 0.991141 | 11911/192 |
| KEGG_Pathmmu04972 | Protein digestion             | 2/178  | 90/8294  | 0.579375 | 0.991141 | 0.991141 | 12824/436 |
| KEGG_Pathmmu04975 | Fat digestion                 | 1/178  | 40/8294  | 0.580993 | 0.991141 | 0.991141 | 110460    |
| KEGG_Pathmmu04910 | Insulin signaling             | 3/178  | 140/8294 | 0.582168 | 0.991141 | 0.991141 | 107476/19 |
| KEGG_Pathmmu05032 | Morphine                      | 2/178  | 92/8294  | 0.591402 | 0.991141 | 0.991141 | 18573/238 |
| KEGG_Pathmmu05322 | Systemic lupus                | 3/178  | 143/8294 | 0.596637 | 0.991141 | 0.991141 | 15270/150 |
| KEGG_Pathmmu05418 | Fluid shear                   | 3/178  | 143/8294 | 0.596637 | 0.991141 | 0.991141 | 12159/193 |
| KEGG_Pathmmu01522 | Endocrine                     | 12/178 | 93/8294  | 0.59732  | 0.991141 | 0.991141 | 18131/204 |
| KEGG_Pathmmu03420 | Nucleotide                    | 1/178  | 43/8294  | 0.607523 | 0.991141 | 0.991141 | 14884     |
| KEGG_Pathmmu04962 | Vasopressin                   | 1/178  | 43/8294  | 0.607523 | 0.991141 | 0.991141 | 53869     |
| KEGG_Pathmmu03015 | mRNA survival                 | 2/178  | 96/8294  | 0.614689 | 0.991141 | 0.991141 | 68092/541 |
| KEGG_Pathmmu00562 | Glycerophospholipid           | 2/178  | 97/8294  | 0.62035  | 0.991141 | 0.991141 | 52858/333 |
| KEGG_Pathmmu05215 | Prostate cancer               | 2/178  | 97/8294  | 0.62035  | 0.991141 | 0.991141 | 11911/187 |
| KEGG_Pathmmu04978 | Mineral absorption            | 1/178  | 45/8294  | 0.624276 | 0.991141 | 0.991141 | 73649     |
| KEGG_Pathmmu04062 | Chemokines                    | 4/178  | 200/8294 | 0.626807 | 0.991141 | 0.991141 | 227288/19 |
| KEGG_Pathmmu04620 | Toll-like receptors           | 2/178  | 99/8294  | 0.631482 | 0.991141 | 0.991141 | 15967/544 |
| KEGG_Pathmmu03050 | Proteasome                    | 1/178  | 46/8294  | 0.632383 | 0.991141 | 0.991141 | 19184     |
| KEGG_Pathmmu04933 | AGE-RAGE                      | 2/178  | 100/8294 | 0.636952 | 0.991141 | 0.991141 | 13058/203 |
| KEGG_Pathmmu04922 | Glucagon                      | 2/178  | 102/8294 | 0.647703 | 0.991141 | 0.991141 | 107476/11 |
| KEGG_Pathmmu05162 | Human cytotoxic T lymphocyte  | 5/178  | 256/8294 | 0.647735 | 0.991141 | 0.991141 | 11911/159 |
| KEGG_Pathmmu04972 | Pancreatic                    | 2/178  | 103/8294 | 0.652984 | 0.991141 | 0.991141 | 53869/436 |
| KEGG_Pathmmu04979 | Cholesterol                   | 1/178  | 49/8294  | 0.655677 | 0.991141 | 0.991141 | 79196     |
| KEGG_Pathmmu05142 | Malaria                       | 1/178  | 49/8294  | 0.655677 | 0.991141 | 0.991141 | 20339     |
| KEGG_Pathmmu00270 | Cysteine                      | 1/178  | 50/8294  | 0.66311  | 0.991141 | 0.991141 | 229905    |
| KEGG_Pathmmu00330 | Arginine                      | 1/178  | 50/8294  | 0.66311  | 0.991141 | 0.991141 | 18242     |
| KEGG_Pathmmu04066 | HIF-1 signaling               | 2/178  | 105/8294 | 0.663357 | 0.991141 | 0.991141 | 11602/130 |
| KEGG_Pathmmu05012 | Amyotrophic lateral sclerosis | 1/178  | 52/8294  | 0.677502 | 0.991141 | 0.991141 | 67819     |
| KEGG_Pathmmu04725 | Cholinergic                   | 2/178  | 113/8294 | 0.702383 | 0.991141 | 0.991141 | 11911/226 |
| KEGG_Pathmmu04722 | Glutamate                     | 2/178  | 114/8294 | 0.706989 | 0.991141 | 0.991141 | 14645/108 |
| KEGG_Pathmmu05225 | Hepatocellular carcinoma      | 3/178  | 171/8294 | 0.715507 | 0.991141 | 0.991141 | 83766/204 |
| KEGG_Pathmmu00240 | Pyrimidine                    | 1/178  | 58/8294  | 0.71711  | 0.991141 | 0.991141 | 69719     |
| KEGG_Pathmmu04370 | VEGF signaling                | 1/178  | 58/8294  | 0.71711  | 0.991141 | 0.991141 | 19354     |
| KEGG_Pathmmu05132 | Legionellosis                 | 1/178  | 58/8294  | 0.71711  | 0.991141 | 0.991141 | 12747     |
| KEGG_Pathmmu00310 | Lysine degradation            | 1/178  | 59/8294  | 0.723224 | 0.991141 | 0.991141 | 110460    |
| KEGG_Pathmmu05321 | Inflammation                  | 1/178  | 59/8294  | 0.723224 | 0.991141 | 0.991141 | 16161     |

|                                      |          |          |          |          |           |
|--------------------------------------|----------|----------|----------|----------|-----------|
| KEGG_Pathmmu0301(Ribosome 3/178      | 175/8294 | 0.730083 | 0.991141 | 0.991141 | 77721/199 |
| KEGG_Pathmmu0120(Carbon me2/178      | 120/8294 | 0.733397 | 0.991141 | 0.991141 | 110460/11 |
| KEGG_Pathmmu0472(Neurotropl2/178     | 121/8294 | 0.737597 | 0.991141 | 0.991141 | 11911/204 |
| KEGG_Pathmmu0515(Tuberculos3/178     | 178/8294 | 0.740629 | 0.991141 | 0.991141 | 108664/15 |
| KEGG_Pathmmu0407(Sphingolipi2/178    | 122/8294 | 0.741741 | 0.991141 | 0.991141 | 19354/203 |
| KEGG_Pathmmu0521(Basal cell c1/178   | 63/8294  | 0.746394 | 0.991141 | 0.991141 | 12159     |
| KEGG_Pathmmu0438(Osteoclast 2/178    | 128/8294 | 0.765453 | 0.991141 | 0.991141 | 14282/164 |
| KEGG_Pathmmu0472(Long-term 1/178     | 67/8294  | 0.767633 | 0.991141 | 0.991141 | 11911     |
| KEGG_Pathmmu0514(Leishmania 1/178    | 67/8294  | 0.767633 | 0.991141 | 0.991141 | 13058     |
| KEGG_Pathmmu0492(Cortisol syr 1/178  | 68/8294  | 0.772661 | 0.991141 | 0.991141 | 11911     |
| KEGG_Pathmmu0492(Relaxin sigi2/178   | 131/8294 | 0.776588 | 0.991141 | 0.991141 | 11911/204 |
| KEGG_Pathmmu0516(Human T-c4/178      | 246/8294 | 0.779381 | 0.991141 | 0.991141 | 11911/129 |
| KEGG_Pathmmu0491(Estrogen si2/178    | 133/8294 | 0.783754 | 0.991141 | 0.991141 | 11911/204 |
| KEGG_Pathmmu0411(p53 signali 1/178   | 71/8294  | 0.787104 | 0.991141 | 0.991141 | 26374     |
| KEGG_Pathmmu0019(Oxidative p2/178    | 134/8294 | 0.787262 | 0.991141 | 0.991141 | 108664/70 |
| KEGG_Pathmmu0466(B cell recep1/178   | 72/8294  | 0.791712 | 0.991141 | 0.991141 | 19354     |
| KEGG_Pathmmu0491(Prolactin si 1/178  | 72/8294  | 0.791712 | 0.991141 | 0.991141 | 20416     |
| KEGG_Pathmmu0492(Renin secre1/178    | 72/8294  | 0.791712 | 0.991141 | 0.991141 | 18573     |
| KEGG_Pathmmu0541(Arrhythmo 1/178     | 72/8294  | 0.791712 | 0.991141 | 0.991141 | 24052     |
| KEGG_Pathmmu0491(Thyroid ho 1/178    | 73/8294  | 0.796221 | 0.991141 | 0.991141 | 11911     |
| KEGG_Pathmmu0402(cAMP signi3/178     | 198/8294 | 0.802809 | 0.991141 | 0.991141 | 106952/23 |
| KEGG_Pathmmu0521(Glioma 1/178        | 75/8294  | 0.804951 | 0.991141 | 0.991141 | 20416     |
| KEGG_Pathmmu0451(Focal adhe 3/178    | 199/8294 | 0.805564 | 0.991141 | 0.991141 | 12824/193 |
| KEGG_Pathmmu0522(Chronic my 1/178    | 76/8294  | 0.809175 | 0.991141 | 0.991141 | 20416     |
| KEGG_Pathmmu0513(Salmonella 1/178    | 78/8294  | 0.817352 | 0.991141 | 0.991141 | 12981     |
| KEGG_Pathmmu0501(Parkinson c2/178    | 144/8294 | 0.819677 | 0.991141 | 0.991141 | 68943/562 |
| KEGG_Pathmmu0532(Autoimmui 1/178     | 79/8294  | 0.821309 | 0.991141 | 0.991141 | 15967     |
| KEGG_Pathmmu0152(EGFR tyros 1/178    | 80/8294  | 0.825181 | 0.991141 | 0.991141 | 20416     |
| KEGG_Pathmmu0522(Breast canc2/178    | 147/8294 | 0.828506 | 0.991141 | 0.991141 | 18131/204 |
| KEGG_Pathmmu0493(Non-alcoh 2/178     | 151/8294 | 0.839676 | 0.991141 | 0.991141 | 11911/126 |
| KEGG_Pathmmu0401(ErbB signal1/178    | 84/8294  | 0.839852 | 0.991141 | 0.991141 | 20416     |
| KEGG_Pathmmu0541(Hypertrop1/178      | 84/8294  | 0.839852 | 0.991141 | 0.991141 | 24052     |
| KEGG_Pathmmu0491(Insulin secr 1/178  | 85/8294  | 0.843324 | 0.991141 | 0.991141 | 11911     |
| KEGG_Pathmmu0454(Gap junctio 1/178   | 86/8294  | 0.846721 | 0.991141 | 0.991141 | 545486    |
| KEGG_Pathmmu0466(Fc gamma 1/178      | 87/8294  | 0.850045 | 0.991141 | 0.991141 | 19354     |
| KEGG_Pathmmu0415(mTOR sign2/178      | 155/8294 | 0.850186 | 0.991141 | 0.991141 | 108664/80 |
| KEGG_Pathmmu0474(Taste trans 1/178   | 88/8294  | 0.853298 | 0.991141 | 0.991141 | 18573     |
| KEGG_Pathmmu0541(Dilated car 1/178   | 89/8294  | 0.85648  | 0.991141 | 0.991141 | 24052     |
| KEGG_Pathmmu0421(Longevity r 1/178   | 90/8294  | 0.859593 | 0.991141 | 0.991141 | 11911     |
| KEGG_Pathmmu0472(GABAergic 1/178     | 90/8294  | 0.859593 | 0.991141 | 0.991141 | 14645     |
| KEGG_Pathmmu0522(Small cell li 1/178 | 92/8294  | 0.86562  | 0.991141 | 0.991141 | 54124     |
| KEGG_Pathmmu0520(Chemical c 1/178    | 94/8294  | 0.87139  | 0.991141 | 0.991141 | 229905    |
| KEGG_Pathmmu0464(Hematopo 1/178      | 95/8294  | 0.874182 | 0.991141 | 0.991141 | 12981     |
| KEGG_Pathmmu0401(MAPK sign 4/178     | 294/8294 | 0.881545 | 0.991141 | 0.991141 | 11602/119 |
| KEGG_Pathmmu0451(Cell adhesi 2/178   | 169/8294 | 0.882233 | 0.991141 | 0.991141 | 19274/203 |
| KEGG_Pathmmu0523(Choline me 1/178    | 99/8294  | 0.884759 | 0.991141 | 0.991141 | 19354     |
| KEGG_Pathmmu0492(Aldosteron 1/178    | 100/8294 | 0.887262 | 0.991141 | 0.991141 | 11911     |
| KEGG_Pathmmu0466(T cell recep 1/178  | 101/8294 | 0.889711 | 0.991141 | 0.991141 | 12981     |

|                   |                     |          |          |          |          |           |
|-------------------|---------------------|----------|----------|----------|----------|-----------|
| KEGG_Pathmmu05170 | Human imr3/178      | 239/8294 | 0.891943 | 0.991141 | 0.991141 | 15967/192 |
| KEGG_Pathmmu04659 | Th17 cell d1/178    | 102/8294 | 0.892107 | 0.991141 | 0.991141 | 16161     |
| KEGG_Pathmmu05169 | Human pa5/178       | 361/8294 | 0.892881 | 0.991141 | 0.991141 | 108664/12 |
| KEGG_Pathmmu04064 | NF-kappa 1/178      | 104/8294 | 0.896745 | 0.991141 | 0.991141 | 18792     |
| KEGG_Pathmmu05146 | Amoebiasis1/178     | 106/8294 | 0.901185 | 0.991141 | 0.991141 | 12981     |
| KEGG_Pathmmu05145 | Toxoplasma 1/178    | 108/8294 | 0.905435 | 0.991141 | 0.991141 | 16155     |
| KEGG_Pathmmu04931 | Insulin resist1/178 | 109/8294 | 0.907491 | 0.991141 | 0.991141 | 26458     |
| KEGG_Pathmmu04020 | Calcium sig2/178    | 187/8294 | 0.914178 | 0.991141 | 0.991141 | 18573/192 |
| KEGG_Pathmmu04114 | Oocyte me1/178      | 116/8294 | 0.920692 | 0.991141 | 0.991141 | 105988    |
| KEGG_Pathmmu04110 | Cell cycle 1/178    | 123/8294 | 0.932018 | 0.991141 | 0.991141 | 105988    |
| KEGG_Pathmmu04142 | Lysosome 1/178      | 124/8294 | 0.933499 | 0.991141 | 0.991141 | 108664    |
| KEGG_Pathmmu04270 | Vascular sn1/178    | 129/8294 | 0.940436 | 0.991141 | 0.991141 | 17880     |
| KEGG_Pathmmu04068 | FoxO signa1/178     | 132/8294 | 0.944248 | 0.991141 | 0.991141 | 54601     |
| KEGG_Pathmmu04728 | Dopamine r1/178     | 135/8294 | 0.947817 | 0.991141 | 0.991141 | 11911     |
| KEGG_Pathmmu04210 | Apoptosis 1/178     | 136/8294 | 0.948955 | 0.991141 | 0.991141 | 11911     |
| KEGG_Pathmmu05167 | Kaposi sarc2/178    | 217/8294 | 0.9501   | 0.991141 | 0.991141 | 12981/159 |
| KEGG_Pathmmu04080 | Neuroactiv3/178     | 289/8294 | 0.951024 | 0.991141 | 0.991141 | 14765/108 |
| KEGG_Pathmmu04371 | Apelin sign1/178    | 139/8294 | 0.952225 | 0.991141 | 0.991141 | 18131     |
| KEGG_Pathmmu04151 | PI3K-Akt si4/178    | 358/8294 | 0.952794 | 0.991141 | 0.991141 | 11602/119 |
| KEGG_Pathmmu04261 | Adrenergic1/178     | 147/8294 | 0.95996  | 0.991141 | 0.991141 | 11911     |
| KEGG_Pathmmu05200 | Viral carcin2/178   | 231/8294 | 0.96147  | 0.991141 | 0.991141 | 11911/148 |
| KEGG_Pathmmu05226 | Gastric can1/178    | 150/8294 | 0.962528 | 0.991141 | 0.991141 | 20416     |
| KEGG_Pathmmu04934 | Cushing sy1/178     | 158/8294 | 0.968602 | 0.991141 | 0.991141 | 11911     |
| KEGG_Pathmmu04530 | Tight juncti1/178   | 167/8294 | 0.974273 | 0.991141 | 0.991141 | 17880     |
| KEGG_Pathmmu04022 | cGMP-PKC1/178       | 168/8294 | 0.974836 | 0.991141 | 0.991141 | 11911     |
| KEGG_Pathmmu05010 | Alzheimer r1/178    | 175/8294 | 0.978452 | 0.991141 | 0.991141 | 23821     |
| KEGG_Pathmmu04360 | Axon guidc1/178     | 180/8294 | 0.980713 | 0.991141 | 0.991141 | 19354     |
| KEGG_Pathmmu05016 | Huntingtor1/178     | 194/8294 | 0.985865 | 0.991141 | 0.991141 | 71770     |
| KEGG_Pathmmu05206 | Proteoglyc1/178     | 204/8294 | 0.988683 | 0.991141 | 0.991141 | 18792     |
| KEGG_Pathmmu04810 | Regulation 1/178    | 215/8294 | 0.991141 | 0.991141 | 0.991141 | 19354     |
| KEGG_Pathmmu04724 | Glutamater7/164     | 114/8294 | 0.007294 | 0.793293 | 0.793293 | 14700/147 |
| KEGG_Pathmmu00480 | Glutathione5/164    | 64/8294  | 0.008478 | 0.793293 | 0.793293 | 110175/14 |
| KEGG_Pathmmu04086 | Neuroactiv12/164    | 289/8294 | 0.011959 | 0.793293 | 0.793293 | 11438/108 |
| KEGG_Pathmmu04726 | Cholinergic6/164    | 113/8294 | 0.024311 | 0.984834 | 0.984834 | 11438/108 |
| KEGG_Pathmmu00051 | Fructose ar3/164    | 35/8294  | 0.031288 | 0.984834 | 0.984834 | 234730/15 |
| KEGG_Pathmmu04390 | Hippo sign7/164     | 154/8294 | 0.032868 | 0.984834 | 0.984834 | 11839/120 |
| KEGG_Pathmmu00100 | Steroid bio2/164    | 19/8294  | 0.053333 | 0.984834 | 0.984834 | 74754/731 |
| KEGG_Pathmmu04340 | Hedgehog 3/164      | 44/8294  | 0.055735 | 0.984834 | 0.984834 | 57810/161 |
| KEGG_Pathmmu00520 | Amino sug3/164      | 49/8294  | 0.072272 | 0.984834 | 0.984834 | 234730/15 |
| KEGG_Pathmmu03460 | Fanconi an3/164     | 51/8294  | 0.079434 | 0.984834 | 0.984834 | 208836/15 |
| KEGG_Pathmmu00980 | Drug meta4/164      | 87/8294  | 0.093258 | 0.984834 | 0.984834 | 14858/103 |
| KEGG_Pathmmu00524 | Neomycin, 1/164     | 5/8294   | 0.095055 | 0.984834 | 0.984834 | 15275     |
| KEGG_Pathmmu04950 | Maturity or2/164    | 27/8294  | 0.098916 | 0.984834 | 0.984834 | 15205/180 |
| KEGG_Pathmmu05204 | Chemical c4/164     | 94/8294  | 0.115301 | 0.984834 | 0.984834 | 13097/148 |
| KEGG_Pathmmu04926 | Relaxin sig5/164    | 131/8294 | 0.117615 | 0.984834 | 0.984834 | 14700/147 |
| KEGG_Pathmmu00630 | Glyoxylate 2/164    | 31/8294  | 0.12463  | 0.984834 | 0.984834 | 13382/681 |
| KEGG_Pathmmu05217 | Basal cell c3/164   | 63/8294  | 0.128215 | 0.984834 | 0.984834 | 12006/121 |
| KEGG_Pathmmu04710 | Circadian e4/164    | 98/8294  | 0.128835 | 0.984834 | 0.984834 | 14700/147 |

|                                |        |          |          |          |          |           |
|--------------------------------|--------|----------|----------|----------|----------|-----------|
| KEGG_Pathmmu0002C Citrate cycl | 2/164  | 32/8294  | 0.131289 | 0.984834 | 0.984834 | 235339/13 |
| KEGG_Pathmmu0006Z Fatty acid ε | 2/164  | 32/8294  | 0.131289 | 0.984834 | 0.984834 | 54326/757 |
| KEGG_Pathmmu0406C Cytokine-c   | 9/164  | 296/8294 | 0.131962 | 0.984834 | 0.984834 | 12156/203 |
| KEGG_Pathmmu0098C Metabolism   | 3/164  | 66/8294  | 0.141766 | 0.984834 | 0.984834 | 14858/103 |
| KEGG_Pathmmu0491C Insulin sign | 5/164  | 140/8294 | 0.143868 | 0.984834 | 0.984834 | 15275/689 |
| KEGG_Pathmmu0001C Glycolysis / | 3/164  | 67/8294  | 0.146387 | 0.984834 | 0.984834 | 235339/13 |
| KEGG_Pathmmu0098Z Drug meta    | 3/164  | 68/8294  | 0.151056 | 0.984834 | 0.984834 | 14858/103 |
| KEGG_Pathmmu0411E p53 signali  | 3/164  | 71/8294  | 0.165342 | 0.984834 | 0.984834 | 12048/125 |
| KEGG_Pathmmu0062C Pyruvate m   | 2/164  | 38/8294  | 0.172729 | 0.984834 | 0.984834 | 235339/13 |
| KEGG_Pathmmu0026C Glycine, ser | 2/164  | 40/8294  | 0.186984 | 0.984834 | 0.984834 | 13382/681 |
| KEGG_Pathmmu0503C Nicotine ac  | 2/164  | 40/8294  | 0.186984 | 0.984834 | 0.984834 | 11438/148 |
| KEGG_Pathmmu0517C Human imi    | 7/164  | 239/8294 | 0.194537 | 0.984834 | 0.984834 | 11766/120 |
| KEGG_Pathmmu0152Z Platinum d   | 3/164  | 77/8294  | 0.195018 | 0.984834 | 0.984834 | 12048/148 |
| KEGG_Pathmmu0406Z Chemokine    | 6/164  | 200/8294 | 0.204163 | 0.984834 | 0.984834 | 20304/809 |
| KEGG_Pathmmu0120C Carbon me    | 4/164  | 120/8294 | 0.213305 | 0.984834 | 0.984834 | 235339/13 |
| KEGG_Pathmmu0435C TGF-beta s   | 3/164  | 85/8294  | 0.23638  | 0.984834 | 0.984834 | 12156/145 |
| KEGG_Pathmmu0493C Type II dia  | 2/164  | 48/8294  | 0.245254 | 0.984834 | 0.984834 | 15275/187 |
| KEGG_Pathmmu0522E Hepatocell   | 5/164  | 171/8294 | 0.249927 | 0.984834 | 0.984834 | 12006/120 |
| KEGG_Pathmmu0474Z Taste trans  | 3/164  | 88/8294  | 0.252279 | 0.984834 | 0.984834 | 268934/38 |
| KEGG_Pathmmu0521C Colorectal   | 3/164  | 88/8294  | 0.252279 | 0.984834 | 0.984834 | 11839/120 |
| KEGG_Pathmmu0014C Steroid hor  | 3/164  | 89/8294  | 0.257614 | 0.984834 | 0.984834 | 13097/789 |
| KEGG_Pathmmu0060Z Glycosphin   | 1/164  | 15/8294  | 0.259054 | 0.984834 | 0.984834 | 26938     |
| KEGG_Pathmmu0073C Thiamine n   | 1/164  | 15/8294  | 0.259054 | 0.984834 | 0.984834 | 78801     |
| KEGG_Pathmmu0406E FoxO signa   | 4/164  | 132/8294 | 0.264602 | 0.984834 | 0.984834 | 16598/136 |
| KEGG_Pathmmu0472E Serotonerg   | 4/164  | 132/8294 | 0.264602 | 0.984834 | 0.984834 | 13097/147 |
| KEGG_Pathmmu0501Z Amyotrop     | 2/164  | 52/8294  | 0.27472  | 0.984834 | 0.984834 | 12048/148 |
| KEGG_Pathmmu0436C Axon guid    | z5/164 | 180/8294 | 0.283946 | 0.984834 | 0.984834 | 319713/18 |
| KEGG_Pathmmu0455C Signaling p  | 4/164  | 137/8294 | 0.286644 | 0.984834 | 0.984834 | 12006/139 |
| KEGG_Pathmmu0091C Nitrogen n   | 1/164  | 17/8294  | 0.28812  | 0.984834 | 0.984834 | 12353     |
| KEGG_Pathmmu0437I Apelin sign  | 4/164  | 139/8294 | 0.295539 | 0.984834 | 0.984834 | 14700/147 |
| KEGG_Pathmmu0541E Fluid shear  | 4/164  | 143/8294 | 0.313429 | 0.984834 | 0.984834 | 14858/103 |
| KEGG_Pathmmu0520E MicroRNAε    | 7/164  | 281/8294 | 0.320824 | 0.984834 | 0.984834 | 723825/72 |
| KEGG_Pathmmu0413I Mitophagy    | 2/164  | 63/8294  | 0.355016 | 0.984834 | 0.984834 | 12048/214 |
| KEGG_Pathmmu0462C Cytosolic C  | 2/164  | 64/8294  | 0.362188 | 0.984834 | 0.984834 | 20304/230 |
| KEGG_Pathmmu0493I Insulin resi | z3/164 | 109/8294 | 0.365928 | 0.984834 | 0.984834 | 18762/192 |
| KEGG_Pathmmu0053Z Glycosamir   | 1/164  | 24/8294  | 0.381209 | 0.984834 | 0.984834 | 17423     |
| KEGG_Pathmmu0497I Vitamin di   | z1/164 | 24/8294  | 0.381209 | 0.984834 | 0.984834 | 20509     |
| KEGG_Pathmmu0472C Long-term    | 2/164  | 67/8294  | 0.383521 | 0.984834 | 0.984834 | 14813/582 |
| KEGG_Pathmmu0516C Human cyt    | 6/164  | 256/8294 | 0.39512  | 0.984834 | 0.984834 | 20304/147 |
| KEGG_Pathmmu0300E Ribosome l   | 3/164  | 116/8294 | 0.403581 | 0.984834 | 0.984834 | 102216272 |
| KEGG_Pathmmu0439Z Hippo sign   | 1/164  | 26/8294  | 0.405509 | 0.984834 | 0.984834 | 18016     |
| KEGG_Pathmmu0463C JAK-STAT     | z4/164 | 165/8294 | 0.412506 | 0.984834 | 0.984834 | 12048/230 |
| KEGG_Pathmmu0005C Ascorbate    | 1/164  | 27/8294  | 0.417301 | 0.984834 | 0.984834 | 394432    |
| KEGG_Pathmmu0474Z Phototrans   | 1/164  | 27/8294  | 0.417301 | 0.984834 | 0.984834 | 20215     |
| KEGG_Pathmmu0496E Collecting   | 1/164  | 27/8294  | 0.417301 | 0.984834 | 0.984834 | 20499     |
| KEGG_Pathmmu0452C Adherens j   | 2/164  | 72/8294  | 0.418373 | 0.984834 | 0.984834 | 19268/218 |
| KEGG_Pathmmu0051Z Mucin type   | 1/164  | 28/8294  | 0.42886  | 0.984834 | 0.984834 | 272411    |
| KEGG_Pathmmu0521Z Pancreatic   | 2/164  | 75/8294  | 0.438807 | 0.984834 | 0.984834 | 12048/218 |

|                  |               |       |          |          |          |          |           |
|------------------|---------------|-------|----------|----------|----------|----------|-----------|
| KEGG_Pathmmu0522 | Chronic my    | 2/164 | 76/8294  | 0.445532 | 0.984834 | 0.984834 | 12048/218 |
| KEGG_Pathmmu0152 | Antifolate r  | 1/164 | 30/8294  | 0.4513   | 0.984834 | 0.984834 | 20509     |
| KEGG_Pathmmu0064 | Propanoate    | 1/164 | 31/8294  | 0.462189 | 0.984834 | 0.984834 | 13382     |
| KEGG_Pathmmu0005 | Galactose r   | 1/164 | 32/8294  | 0.472863 | 0.984834 | 0.984834 | 15275     |
| KEGG_Pathmmu0104 | Biosynthesi   | 1/164 | 32/8294  | 0.472863 | 0.984834 | 0.984834 | 54326     |
| KEGG_Pathmmu0421 | Apoptosis     | 1/164 | 32/8294  | 0.472863 | 0.984834 | 0.984834 | 12048     |
| KEGG_Pathmmu0050 | Starch and    | 1/164 | 33/8294  | 0.483327 | 0.984834 | 0.984834 | 15275     |
| KEGG_Pathmmu0301 | RNA degra     | 2/164 | 83/8294  | 0.491311 | 0.984834 | 0.984834 | 72662/725 |
| KEGG_Pathmmu0004 | Pentose an    | 1/164 | 34/8294  | 0.493584 | 0.984834 | 0.984834 | 394432    |
| KEGG_Pathmmu0502 | Prion disea   | 1/164 | 34/8294  | 0.493584 | 0.984834 | 0.984834 | 20304     |
| KEGG_Pathmmu0491 | Insulin secr  | 2/164 | 85/8294  | 0.503953 | 0.984834 | 0.984834 | 14607/588 |
| KEGG_Pathmmu0023 | Purine met    | 3/164 | 136/8294 | 0.506784 | 0.984834 | 0.984834 | 102216272 |
| KEGG_Pathmmu0516 | Measles       | 3/164 | 136/8294 | 0.506784 | 0.984834 | 0.984834 | 17221/230 |
| KEGG_Pathmmu0402 | Calcium sig   | 4/164 | 187/8294 | 0.508435 | 0.984834 | 0.984834 | 14813/572 |
| KEGG_Pathmmu0534 | Primary im    | 1/164 | 36/8294  | 0.513495 | 0.984834 | 0.984834 | 11634     |
| KEGG_Pathmmu0401 | MAPK sign     | 6/164 | 294/8294 | 0.527634 | 0.984834 | 0.984834 | 11839/687 |
| KEGG_Pathmmu0496 | Aldosteron    | 1/164 | 38/8294  | 0.532628 | 0.984834 | 0.984834 | 20393     |
| KEGG_Pathmmu0472 | GABAergic     | 2/164 | 90/8294  | 0.534662 | 0.984834 | 0.984834 | 14700/147 |
| KEGG_Pathmmu0497 | Protein dig   | 2/164 | 90/8294  | 0.534662 | 0.984834 | 0.984834 | 13706/373 |
| KEGG_Pathmmu0083 | Retinol me    | 2/164 | 91/8294  | 0.540647 | 0.984834 | 0.984834 | 13097/394 |
| KEGG_Pathmmu0503 | Morphine      | 2/164 | 92/8294  | 0.546579 | 0.984834 | 0.984834 | 14700/147 |
| KEGG_Pathmmu0497 | Fat digesti   | 1/164 | 40/8294  | 0.551013 | 0.984834 | 0.984834 | 26569     |
| KEGG_Pathmmu0086 | Porphyrin     | 1/164 | 41/8294  | 0.559934 | 0.984834 | 0.984834 | 394432    |
| KEGG_Pathmmu0344 | Homologo      | 1/164 | 41/8294  | 0.559934 | 0.984834 | 0.984834 | 21976     |
| KEGG_Pathmmu0415 | PI3K-Akt si   | 7/164 | 358/8294 | 0.567045 | 0.984834 | 0.984834 | 11839/120 |
| KEGG_Pathmmu0467 | Intestinal ir | 1/164 | 43/8294  | 0.577251 | 0.984834 | 0.984834 | 18703     |
| KEGG_Pathmmu0496 | Vasopressin   | 1/164 | 43/8294  | 0.577251 | 0.984834 | 0.984834 | 11998     |
| KEGG_Pathmmu0497 | Carbohydr     | 1/164 | 43/8294  | 0.577251 | 0.984834 | 0.984834 | 15275     |
| KEGG_Pathmmu0520 | Proteoglyc    | 4/164 | 204/8294 | 0.577571 | 0.984834 | 0.984834 | 68794/161 |
| KEGG_Pathmmu0302 | Basal trans   | 1/164 | 44/8294  | 0.585653 | 0.984834 | 0.984834 | 74197     |
| KEGG_Pathmmu0462 | Toll-like re  | 2/164 | 99/8294  | 0.586601 | 0.984834 | 0.984834 | 20304/230 |
| KEGG_Pathmmu0493 | AGE-RAGE      | 2/164 | 100/8294 | 0.592102 | 0.984834 | 0.984834 | 18762/218 |
| KEGG_Pathmmu0497 | Mineral ab    | 1/164 | 45/8294  | 0.59389  | 0.984834 | 0.984834 | 12309     |
| KEGG_Pathmmu0415 | mTOR sign     | 3/164 | 155/8294 | 0.595699 | 0.984834 | 0.984834 | 329679/10 |
| KEGG_Pathmmu0514 | Chagas dis    | 2/164 | 101/8294 | 0.597549 | 0.984834 | 0.984834 | 20304/218 |
| KEGG_Pathmmu0465 | Th17 cell d   | 2/164 | 102/8294 | 0.602941 | 0.984834 | 0.984834 | 239114/21 |
| KEGG_Pathmmu0497 | Pancreatic    | 2/164 | 103/8294 | 0.608279 | 0.984834 | 0.984834 | 13706/220 |
| KEGG_Pathmmu0056 | Ether lipid   | 1/164 | 47/8294  | 0.609878 | 0.984834 | 0.984834 | 104759    |
| KEGG_Pathmmu0060 | Sphingolip    | 1/164 | 48/8294  | 0.617636 | 0.984834 | 0.984834 | 238011    |
| KEGG_Pathmmu0503 | Cocaine ad    | 1/164 | 48/8294  | 0.617636 | 0.984834 | 0.984834 | 14813     |
| KEGG_Pathmmu0433 | Notch sign    | 1/164 | 49/8294  | 0.625241 | 0.984834 | 0.984834 | 15205     |
| KEGG_Pathmmu0516 | Kaposi sarc   | 4/164 | 217/8294 | 0.626586 | 0.984834 | 0.984834 | 14700/147 |
| KEGG_Pathmmu0033 | Arginine ar   | 1/164 | 50/8294  | 0.632695 | 0.984834 | 0.984834 | 66988     |
| KEGG_Pathmmu0059 | Linoleic aci  | 1/164 | 50/8294  | 0.632695 | 0.984834 | 0.984834 | 13097     |
| KEGG_Pathmmu0514 | Toxoplasm     | 2/164 | 108/8294 | 0.634158 | 0.984834 | 0.984834 | 12048/161 |
| KEGG_Pathmmu0453 | Tight juncti  | 3/164 | 167/8294 | 0.646255 | 0.984834 | 0.984834 | 224912/18 |
| KEGG_Pathmmu0462 | NOD-like r    | 3/164 | 168/8294 | 0.650261 | 0.984834 | 0.984834 | 12048/203 |
| KEGG_Pathmmu0516 | Influenza A   | 3/164 | 168/8294 | 0.650261 | 0.984834 | 0.984834 | 20304/230 |

|                                      |          |          |          |          |           |
|--------------------------------------|----------|----------|----------|----------|-----------|
| KEGG_Pathmmu0028C Valine, leuc1/164  | 56/8294  | 0.674425 | 0.984834 | 0.984834 | 13382     |
| KEGG_Pathmmu0515C Staphyloco1/164    | 56/8294  | 0.674425 | 0.984834 | 0.984834 | 13510     |
| KEGG_Pathmmu0121Z Fatty acid r1/164  | 57/8294  | 0.680907 | 0.984834 | 0.984834 | 54326     |
| KEGG_Pathmmu0024C Pyrimidine 1/164   | 58/8294  | 0.68726  | 0.984834 | 0.984834 | 20135     |
| KEGG_Pathmmu0437C VEGF signa1/164    | 58/8294  | 0.68726  | 0.984834 | 0.984834 | 102626    |
| KEGG_Pathmmu0521C Endometriç1/164    | 58/8294  | 0.68726  | 0.984834 | 0.984834 | 12006     |
| KEGG_Pathmmu0407I Sphingolip12/164   | 122/8294 | 0.699528 | 0.984834 | 0.984834 | 18762/136 |
| KEGG_Pathmmu0414Z Lysosome 2/164     | 124/8294 | 0.708038 | 0.984834 | 0.984834 | 11766/117 |
| KEGG_Pathmmu0475C Inflammatac2/164   | 125/8294 | 0.712217 | 0.984834 | 0.984834 | 13097/187 |
| KEGG_Pathmmu0523C Central car1/164   | 64/8294  | 0.722823 | 0.984834 | 0.984834 | 15275     |
| KEGG_Pathmmu0427C Vascular sn2/164   | 129/8294 | 0.728439 | 0.984834 | 0.984834 | 58802/187 |
| KEGG_Pathmmu0097C Aminoacyl-1/164    | 66/8294  | 0.733761 | 0.984834 | 0.984834 | 22321     |
| KEGG_Pathmmu0462Z RIG-I-like r1/164  | 68/8294  | 0.744269 | 0.984834 | 0.984834 | 230396    |
| KEGG_Pathmmu0503I Amphetam1/164      | 68/8294  | 0.744269 | 0.984834 | 0.984834 | 14813     |
| KEGG_Pathmmu0472E Dopaminer2/164     | 135/8294 | 0.751325 | 0.984834 | 0.984834 | 14700/147 |
| KEGG_Pathmmu0494C Type I diab1/164   | 70/8294  | 0.754365 | 0.984834 | 0.984834 | 19275     |
| KEGG_Pathmmu0503Z Alcoholism3/164    | 199/8294 | 0.758652 | 0.984834 | 0.984834 | 14700/147 |
| KEGG_Pathmmu0412C Ubiquitin n2/164   | 139/8294 | 0.76565  | 0.984834 | 0.984834 | 11634/686 |
| KEGG_Pathmmu0056Z Inositol ph1/164   | 73/8294  | 0.76877  | 0.984834 | 0.984834 | 75678     |
| KEGG_Pathmmu0497I Gastric acic1/164  | 74/8294  | 0.773383 | 0.984834 | 0.984834 | 20604     |
| KEGG_Pathmmu0516I Hepatitis B 2/164  | 143/8294 | 0.779257 | 0.984834 | 0.984834 | 230396/21 |
| KEGG_Pathmmu0472I Synaptic ve1/164   | 77/8294  | 0.78668  | 0.984834 | 0.984834 | 20508     |
| KEGG_Pathmmu0414Z Endocytosi4/164    | 270/8294 | 0.786874 | 0.984834 | 0.984834 | 67028/187 |
| KEGG_Pathmmu0497C Salivary sec1/164  | 78/8294  | 0.790938 | 0.984834 | 0.984834 | 11830     |
| KEGG_Pathmmu0513Z Salmonella1/164    | 78/8294  | 0.790938 | 0.984834 | 0.984834 | 68794     |
| KEGG_Pathmmu0407Z Phospholip2/164    | 147/8294 | 0.792173 | 0.984834 | 0.984834 | 11998/268 |
| KEGG_Pathmmu0522Z Breast canc2/164   | 147/8294 | 0.792173 | 0.984834 | 0.984834 | 12006/152 |
| KEGG_Pathmmu0532C Autoimmui1/164     | 79/8294  | 0.795111 | 0.984834 | 0.984834 | 230396    |
| KEGG_Pathmmu0152I EGFR tyros1/164    | 80/8294  | 0.799201 | 0.984834 | 0.984834 | 12048     |
| KEGG_Pathmmu0472C Retrograde2/164    | 150/8294 | 0.80142  | 0.984834 | 0.984834 | 14700/147 |
| KEGG_Pathmmu0522E Gastric can2/164   | 150/8294 | 0.80142  | 0.984834 | 0.984834 | 12006/218 |
| KEGG_Pathmmu0492I Oxytocin si2/164   | 153/8294 | 0.810303 | 0.984834 | 0.984834 | 16520/184 |
| KEGG_Pathmmu0532C Rheumatoi1/164     | 83/8294  | 0.810991 | 0.984834 | 0.984834 | 20304     |
| KEGG_Pathmmu0401Z ErbB signal1/164   | 84/8294  | 0.814766 | 0.984834 | 0.984834 | 11839     |
| KEGG_Pathmmu0414E Peroxisom1/164     | 84/8294  | 0.814766 | 0.984834 | 0.984834 | 20524     |
| KEGG_Pathmmu0332C PPAR signa1/164    | 85/8294  | 0.818466 | 0.984834 | 0.984834 | 26569     |
| KEGG_Pathmmu0493Z Cushing sy2/164    | 158/8294 | 0.824327 | 0.984834 | 0.984834 | 12006/194 |
| KEGG_Pathmmu0466E Fc gamma 1/164     | 87/8294  | 0.825648 | 0.984834 | 0.984834 | 15162     |
| KEGG_Pathmmu0461C Compleme1/164      | 88/8294  | 0.829132 | 0.984834 | 0.984834 | 17221     |
| KEGG_Pathmmu0431C Wnt signali2/164   | 160/8294 | 0.829673 | 0.984834 | 0.984834 | 12006/408 |
| KEGG_Pathmmu0059C Arachidoni1/164    | 89/8294  | 0.832547 | 0.984834 | 0.984834 | 13097     |
| KEGG_Pathmmu0491Z Progestero1/164    | 90/8294  | 0.835894 | 0.984834 | 0.984834 | 56150     |
| KEGG_Pathmmu0414I Protein prc2/164   | 163/8294 | 0.837419 | 0.984834 | 0.984834 | 12954/148 |
| KEGG_Pathmmu0516E Epstein-Ba3/164    | 230/8294 | 0.838388 | 0.984834 | 0.984834 | 15205/230 |
| KEGG_Pathmmu0461Z Antigen pri1/164   | 91/8294  | 0.839174 | 0.984834 | 0.984834 | 14827     |
| KEGG_Pathmmu0465Z IL-17 signa1/164   | 91/8294  | 0.839174 | 0.984834 | 0.984834 | 239114    |
| KEGG_Pathmmu0522Z Small cell li1/164 | 92/8294  | 0.84239  | 0.984834 | 0.984834 | 12048     |
| KEGG_Pathmmu0401Z Ras signalir3/164  | 233/8294 | 0.844757 | 0.984834 | 0.984834 | 12048/147 |

|                   |              |        |          |          |          |          |           |
|-------------------|--------------|--------|----------|----------|----------|----------|-----------|
| KEGG_Pathmmu03013 | RNA transcr  | 2/164  | 167/8294 | 0.847254 | 0.984834 | 0.984834 | 408191/56 |
| KEGG_Pathmmu05165 | Human pap    | 5/164  | 361/8294 | 0.847848 | 0.984834 | 0.984834 | 12006/224 |
| KEGG_Pathmmu04514 | Cell adhesi  | 2/164  | 169/8294 | 0.851968 | 0.984834 | 0.984834 | 192167/19 |
| KEGG_Pathmmu03015 | mRNA surv    | 1/164  | 96/8294  | 0.854625 | 0.984834 | 0.984834 | 56488     |
| KEGG_Pathmmu00564 | Glycerophc   | 1/164  | 97/8294  | 0.857533 | 0.984834 | 0.984834 | 104759    |
| KEGG_Pathmmu04070 | Phosphatic   | 1/164  | 98/8294  | 0.860383 | 0.984834 | 0.984834 | 75678     |
| KEGG_Pathmmu03010 | Ribosome     | 2/164  | 175/8294 | 0.865328 | 0.984834 | 0.984834 | 68172/200 |
| KEGG_Pathmmu04217 | Necroptosi   | 2/164  | 177/8294 | 0.869531 | 0.984834 | 0.984834 | 67028/230 |
| KEGG_Pathmmu05166 | Human T-c    | 3/164  | 246/8294 | 0.869913 | 0.984834 | 0.984834 | 12048/561 |
| KEGG_Pathmmu04922 | Glucagon s   | 1/164  | 102/8294 | 0.871229 | 0.984834 | 0.984834 | 68961     |
| KEGG_Pathmmu05152 | Tuberculos   | 2/164  | 178/8294 | 0.871588 | 0.984834 | 0.984834 | 230396/16 |
| KEGG_Pathmmu04064 | NF-kappa     | 1/164  | 104/8294 | 0.876333 | 0.984834 | 0.984834 | 12048     |
| KEGG_Pathmmu04066 | HIF-1 sign   | 1/164  | 105/8294 | 0.87881  | 0.984834 | 0.984834 | 15275     |
| KEGG_Pathmmu05202 | Transcripti  | 2/164  | 183/8294 | 0.881433 | 0.984834 | 0.984834 | 12048/154 |
| KEGG_Pathmmu04668 | TNF signali  | 1/164  | 110/8294 | 0.890471 | 0.984834 | 0.984834 | 20304     |
| KEGG_Pathmmu04625 | C-type lect  | 1/164  | 112/8294 | 0.894817 | 0.984834 | 0.984834 | 239114    |
| KEGG_Pathmmu04919 | Thyroid ho   | 1/164  | 115/8294 | 0.901017 | 0.984834 | 0.984834 | 69790     |
| KEGG_Pathmmu04114 | Oocyte me    | 1/164  | 116/8294 | 0.903002 | 0.984834 | 0.984834 | 56150     |
| KEGG_Pathmmu04650 | Natural kill | 1/164  | 118/8294 | 0.906853 | 0.984834 | 0.984834 | 230396    |
| KEGG_Pathmmu04024 | cAMP signi   | 2/164  | 198/8294 | 0.906951 | 0.984834 | 0.984834 | 14813/192 |
| KEGG_Pathmmu04110 | Cell cycle   | 1/164  | 123/8294 | 0.91583  | 0.984834 | 0.984834 | 56150     |
| KEGG_Pathmmu04611 | Platelet act | 1/164  | 124/8294 | 0.91752  | 0.984834 | 0.984834 | 18762     |
| KEGG_Pathmmu04380 | Osteoclast   | 1/164  | 128/8294 | 0.923947 | 0.984834 | 0.984834 | 21812     |
| KEGG_Pathmmu04140 | Autophagy    | 1/164  | 130/8294 | 0.926971 | 0.984834 | 0.984834 | 12048     |
| KEGG_Pathmmu05168 | Herpes sim   | 2/164  | 215/8294 | 0.929659 | 0.984834 | 0.984834 | 20304/230 |
| KEGG_Pathmmu03040 | Spliceosom   | 1/164  | 133/8294 | 0.931285 | 0.984834 | 0.984834 | 212880    |
| KEGG_Pathmmu04210 | Apoptosis    | 1/164  | 136/8294 | 0.935345 | 0.984834 | 0.984834 | 12048     |
| KEGG_Pathmmu05012 | Parkinson c  | 1/164  | 144/8294 | 0.945044 | 0.988015 | 0.988015 | 66725     |
| KEGG_Pathmmu04261 | Adrenergic   | 1/164  | 147/8294 | 0.948296 | 0.988015 | 0.988015 | 58200     |
| KEGG_Pathmmu05160 | Hepatitis C  | 1/164  | 160/8294 | 0.960315 | 0.990393 | 0.990393 | 230396    |
| KEGG_Pathmmu04022 | cGMP-PKC     | 1/164  | 168/8294 | 0.966284 | 0.990393 | 0.990393 | 58802     |
| KEGG_Pathmmu05010 | Alzheimer    | 1/164  | 175/8294 | 0.97077  | 0.990393 | 0.990393 | 14813     |
| KEGG_Pathmmu04145 | Phagosom     | 1/164  | 181/8294 | 0.97414  | 0.990393 | 0.990393 | 100226    |
| KEGG_Pathmmu04218 | Cellular ser | 1/164  | 186/8294 | 0.97665  | 0.990393 | 0.990393 | 21812     |
| KEGG_Pathmmu04510 | Focal adhe   | 1/164  | 199/8294 | 0.982101 | 0.990393 | 0.990393 | 68794     |
| KEGG_Pathmmu04018 | Rap1 signa   | 1/164  | 209/8294 | 0.985416 | 0.990393 | 0.990393 | 18762     |
| KEGG_Pathmmu05203 | Viral carcin | 1/164  | 231/8294 | 0.990714 | 0.990714 | 0.990714 | 74197     |
| KEGG_Pathmmu04976 | Bile secreti | 8/275  | 71/8294  | 0.002295 | 0.29818  | 0.29818  | 18669/186 |
| KEGG_Pathmmu05206 | MicroRNA     | 19/275 | 281/8294 | 0.002475 | 0.29818  | 0.29818  | 18669/138 |
| KEGG_Pathmmu04978 | Mineral ab   | 6/275  | 45/8294  | 0.003454 | 0.29818  | 0.29818  | 67821/152 |
| KEGG_Pathmmu03460 | Fanconi an   | 6/275  | 51/8294  | 0.006473 | 0.419159 | 0.419159 | 71885/699 |
| KEGG_Pathmmu00910 | Nitrogen r   | 3/275  | 17/8294  | 0.017369 | 0.899701 | 0.899701 | 12349/123 |
| KEGG_Pathmmu04130 | SNARE inte   | 4/275  | 33/8294  | 0.022718 | 0.930659 | 0.930659 | 54399/203 |
| KEGG_Pathmmu04917 | Prolactin si | 6/275  | 72/8294  | 0.03167  | 0.930659 | 0.930659 | 13983/147 |
| KEGG_Pathmmu04964 | Proximal tu  | 3/275  | 22/8294  | 0.034845 | 0.930659 | 0.930659 | 67821/123 |
| KEGG_Pathmmu04010 | MAPK sign    | 16/275 | 294/8294 | 0.035124 | 0.930659 | 0.930659 | 12287/122 |
| KEGG_Pathmmu04148 | Phagosom     | 11/275 | 181/8294 | 0.038165 | 0.930659 | 0.930659 | 74915/149 |
| KEGG_Pathmmu04530 | Tight juncti | 10/275 | 167/8294 | 0.050822 | 0.930659 | 0.930659 | 68178/581 |



|                                      |          |          |          |          |           |
|--------------------------------------|----------|----------|----------|----------|-----------|
| KEGG_Pathmmu00601Glycosphin 3/275    | 27/8294  | 0.058693 | 0.930659 | 0.930659 | 239559/10 |
| KEGG_Pathmmu04380Osteoclast 8/275    | 128/8294 | 0.062242 | 0.930659 | 0.930659 | 14200/147 |
| KEGG_Pathmmu00380Tryptophan 4/275    | 46/8294  | 0.065099 | 0.930659 | 0.930659 | 266645/71 |
| KEGG_Pathmmu03010Ribosome 10/275     | 175/8294 | 0.065571 | 0.930659 | 0.930659 | 66242/199 |
| KEGG_Pathmmu04650Th1 and Th6/275     | 87/8294  | 0.068382 | 0.930659 | 0.930659 | 15980/161 |
| KEGG_Pathmmu02010ABC transp 4/275    | 47/8294  | 0.069385 | 0.930659 | 0.930659 | 18669/186 |
| KEGG_Pathmmu04930Type II dia 4/275   | 48/8294  | 0.073813 | 0.930659 | 0.930659 | 12287/122 |
| KEGG_Pathmmu01520Antifolate r 3/275  | 30/8294  | 0.075846 | 0.930659 | 0.930659 | 239273/14 |
| KEGG_Pathmmu04970Protein dig 6/275   | 90/8294  | 0.077825 | 0.930659 | 0.930659 | 67821/232 |
| KEGG_Pathmmu04210Cellular ser 10/275 | 186/8294 | 0.089948 | 0.930659 | 0.930659 | 14985/150 |
| KEGG_Pathmmu00120Primary bil 2/275   | 16/8294  | 0.096896 | 0.930659 | 0.930659 | 208665/56 |
| KEGG_Pathmmu00600Glycosphin 2/275    | 16/8294  | 0.096896 | 0.930659 | 0.930659 | 239559/14 |
| KEGG_Pathmmu04960Endocrine 4/275     | 54/8294  | 0.103244 | 0.930659 | 0.930659 | 67821/166 |
| KEGG_Pathmmu04140Endocytosi 13/275   | 270/8294 | 0.113457 | 0.930659 | 0.930659 | 213990/21 |
| KEGG_Pathmmu04660T cell recep 6/275  | 101/8294 | 0.11834  | 0.930659 | 0.930659 | 12042/147 |
| KEGG_Pathmmu00510Other glyco 2/275   | 18/8294  | 0.118394 | 0.930659 | 0.930659 | 11593/110 |
| KEGG_Pathmmu05320Autoimmu 5/275      | 79/8294  | 0.121006 | 0.930659 | 0.930659 | 14985/150 |
| KEGG_Pathmmu05220Gastric can 8/275   | 150/8294 | 0.125123 | 0.930659 | 0.930659 | 18669/123 |
| KEGG_Pathmmu05210Endometri 4/275     | 58/8294  | 0.125409 | 0.930659 | 0.930659 | 12385/138 |
| KEGG_Pathmmu04930Non-alcoh 8/275     | 151/8294 | 0.128574 | 0.930659 | 0.930659 | 13063/131 |
| KEGG_Pathmmu04060NF-kappa 6/275      | 104/8294 | 0.130924 | 0.930659 | 0.930659 | 12042/168 |
| KEGG_Pathmmu05320Inflammat 4/275     | 59/8294  | 0.131242 | 0.930659 | 0.930659 | 15980/161 |
| KEGG_Pathmmu04710Thermoger 11/275    | 230/8294 | 0.142166 | 0.930659 | 0.930659 | 67605/119 |
| KEGG_Pathmmu05160Human cyt 12/275    | 256/8294 | 0.143297 | 0.930659 | 0.930659 | 12915/130 |
| KEGG_Pathmmu04970Fat digesti 3/275   | 40/8294  | 0.145872 | 0.930659 | 0.930659 | 11808/237 |
| KEGG_Pathmmu00980Drug meta 5/275     | 87/8294  | 0.161683 | 0.930659 | 0.930659 | 436059/14 |
| KEGG_Pathmmu05160Hepatitis C 8/275   | 160/8294 | 0.161775 | 0.930659 | 0.930659 | 58187/130 |
| KEGG_Pathmmu05230Central car 4/275   | 64/8294  | 0.161992 | 0.930659 | 0.930659 | 13866/197 |
| KEGG_Pathmmu04210Apoptosis 7/275     | 136/8294 | 0.165247 | 0.930659 | 0.930659 | 13063/131 |
| KEGG_Pathmmu04610Compleme 5/275      | 88/8294  | 0.167118 | 0.930659 | 0.930659 | 12267/589 |
| KEGG_Pathmmu05410Viral myoc 5/275    | 88/8294  | 0.167118 | 0.930659 | 0.930659 | 13063/149 |
| KEGG_Pathmmu04970Carbohydr 3/275     | 43/8294  | 0.169949 | 0.930659 | 0.930659 | 67821/205 |
| KEGG_Pathmmu05170Human im 11/275     | 239/8294 | 0.170218 | 0.930659 | 0.930659 | 252903/13 |
| KEGG_Pathmmu05160Herpes sim 10/275   | 215/8294 | 0.176788 | 0.930659 | 0.930659 | 13063/570 |
| KEGG_Pathmmu04210Longevity r 5/275   | 90/8294  | 0.178202 | 0.930659 | 0.930659 | 67605/129 |
| KEGG_Pathmmu00230Caffeine m 1/275    | 6/8294   | 0.18321  | 0.930659 | 0.930659 | 13077     |
| KEGG_Pathmmu00980Drug meta 4/275     | 68/8294  | 0.188285 | 0.930659 | 0.930659 | 71724/130 |
| KEGG_Pathmmu04620RIG-I-like r 4/275  | 68/8294  | 0.188285 | 0.930659 | 0.930659 | 242519/26 |
| KEGG_Pathmmu05220Small cell li 5/275 | 92/8294  | 0.189555 | 0.930659 | 0.930659 | 13063/171 |
| KEGG_Pathmmu05220Acute myel 4/275    | 69/8294  | 0.195064 | 0.930659 | 0.930659 | 14784/175 |
| KEGG_Pathmmu04650Natural kill 6/275  | 118/8294 | 0.197264 | 0.930659 | 0.930659 | 14784/239 |
| KEGG_Pathmmu00560Glycosylph 2/275    | 25/8294  | 0.200429 | 0.930659 | 0.930659 | 56176/230 |
| KEGG_Pathmmu05220Breast canc 7/275   | 147/8294 | 0.215401 | 0.930659 | 0.930659 | 13866/139 |
| KEGG_Pathmmu04660B cell recep 4/275  | 72/8294  | 0.215831 | 0.930659 | 0.930659 | 12042/147 |
| KEGG_Pathmmu05410Arrhythmo 4/275     | 72/8294  | 0.215831 | 0.930659 | 0.930659 | 12385/109 |
| KEGG_Pathmmu04910Thyroid ho 4/275    | 73/8294  | 0.222886 | 0.930659 | 0.930659 | 12915/678 |
| KEGG_Pathmmu04960Collecting 2/275    | 27/8294  | 0.224997 | 0.930659 | 0.930659 | 74915/123 |
| KEGG_Pathmmu04720Retrograde 7/275    | 150/8294 | 0.229967 | 0.930659 | 0.930659 | 12287/147 |

|                   |                    |          |          |          |          |           |
|-------------------|--------------------|----------|----------|----------|----------|-----------|
| KEGG_Pathmmu05166 | Epstein-Ba 10/275  | 230/8294 | 0.233078 | 0.930659 | 0.930659 | 13063/149 |
| KEGG_Pathmmu04935 | AGE-RAGE 5/275     | 100/8294 | 0.23731  | 0.930659 | 0.930659 | 11596/264 |
| KEGG_Pathmmu05152 | Tuberculosis 8/275 | 178/8294 | 0.238393 | 0.930659 | 0.930659 | 12042/130 |
| KEGG_Pathmmu04659 | Th17 cell d 5/275  | 102/8294 | 0.249746 | 0.930659 | 0.930659 | 15980/168 |
| KEGG_Pathmmu01524 | Platinum d 4/275   | 77/8294  | 0.251665 | 0.930659 | 0.930659 | 13063/138 |
| KEGG_Pathmmu04721 | Synaptic ve 4/275  | 77/8294  | 0.251665 | 0.930659 | 0.930659 | 74915/122 |
| KEGG_Pathmmu04972 | Pancreatic 5/275   | 103/8294 | 0.256026 | 0.930659 | 0.930659 | 67821/123 |
| KEGG_Pathmmu05132 | Salmonella 4/275   | 78/8294  | 0.258982 | 0.930659 | 0.930659 | 15980/264 |
| KEGG_Pathmmu00756 | Vitamin B6 1/275   | 9/8294   | 0.261856 | 0.930659 | 0.930659 | 71724     |
| KEGG_Pathmmu05156 | Staphylococ 3/275  | 56/8294  | 0.283775 | 0.930659 | 0.930659 | 12267/171 |
| KEGG_Pathmmu05167 | Kaposi sarc 9/275  | 217/8294 | 0.293293 | 0.930659 | 0.930659 | 13063/147 |
| KEGG_Pathmmu04931 | Insulin resi 5/275 | 109/8294 | 0.294432 | 0.930659 | 0.930659 | 384783/19 |
| KEGG_Pathmmu05134 | Legionellos 3/275  | 58/8294  | 0.302026 | 0.930659 | 0.930659 | 13063/196 |
| KEGG_Pathmmu04630 | JAK-STAT 7/275     | 165/8294 | 0.307052 | 0.930659 | 0.930659 | 71724/147 |
| KEGG_Pathmmu00136 | Ubiquinone 1/275   | 11/8294  | 0.310048 | 0.930659 | 0.930659 | 217707    |
| KEGG_Pathmmu03019 | RNA trans 7/275    | 167/8294 | 0.317735 | 0.930659 | 0.930659 | 13669/163 |
| KEGG_Pathmmu04546 | Gap junctio 4/275  | 86/8294  | 0.318727 | 0.930659 | 0.930659 | 14784/148 |
| KEGG_Pathmmu04724 | Glutamate 5/275    | 114/8294 | 0.327144 | 0.930659 | 0.930659 | 14708/148 |
| KEGG_Pathmmu04514 | Cell adhesi 7/275  | 169/8294 | 0.328483 | 0.930659 | 0.930659 | 12560/581 |
| KEGG_Pathmmu00561 | Glycerolipic 3/275 | 61/8294  | 0.329492 | 0.930659 | 0.930659 | 15450/189 |
| KEGG_Pathmmu00766 | Nicotinate 2/275   | 36/8294  | 0.336361 | 0.930659 | 0.930659 | 71724/181 |
| KEGG_Pathmmu04614 | Renin-angi 2/275   | 36/8294  | 0.336361 | 0.930659 | 0.930659 | 16613/173 |
| KEGG_Pathmmu05346 | Primary im 2/275   | 36/8294  | 0.336361 | 0.930659 | 0.930659 | 16818/197 |
| KEGG_Pathmmu05161 | Hepatitis B 6/275  | 143/8294 | 0.337524 | 0.930659 | 0.930659 | 12915/130 |
| KEGG_Pathmmu04219 | Longevity r 3/275  | 62/8294  | 0.33865  | 0.930659 | 0.930659 | 67605/384 |
| KEGG_Pathmmu05216 | Thyroid car 2/275  | 37/8294  | 0.34855  | 0.930659 | 0.930659 | 27015/197 |
| KEGG_Pathmmu04914 | Progesteron 4/275  | 90/8294  | 0.349057 | 0.930659 | 0.930659 | 99152/208 |
| KEGG_Pathmmu04612 | Antigen pr 4/275   | 91/8294  | 0.356653 | 0.930659 | 0.930659 | 14985/150 |
| KEGG_Pathmmu04657 | IL-17 signa 4/275  | 91/8294  | 0.356653 | 0.930659 | 0.930659 | 16163/264 |
| KEGG_Pathmmu00486 | Glutathione 3/275  | 64/8294  | 0.356939 | 0.930659 | 0.930659 | 66116/148 |
| KEGG_Pathmmu04629 | Cytosolic C 3/275  | 64/8294  | 0.356939 | 0.930659 | 0.930659 | 242519/19 |
| KEGG_Pathmmu05336 | Allograft re 3/275 | 64/8294  | 0.356939 | 0.930659 | 0.930659 | 14985/150 |
| KEGG_Pathmmu05209 | Viral carcin 9/275 | 231/8294 | 0.358418 | 0.930659 | 0.930659 | 12915/991 |
| KEGG_Pathmmu04966 | Aldosterone 2/275  | 38/8294  | 0.360664 | 0.930659 | 0.930659 | 67821/838 |
| KEGG_Pathmmu05332 | Graft-vers 3/275   | 65/8294  | 0.36606  | 0.930659 | 0.930659 | 14985/150 |
| KEGG_Pathmmu01522 | Endocrine 4/275    | 93/8294  | 0.371841 | 0.930659 | 0.930659 | 13866/139 |
| KEGG_Pathmmu00976 | Aminoacyl- 3/275   | 66/8294  | 0.37516  | 0.930659 | 0.930659 | 67417/699 |
| KEGG_Pathmmu05229 | Non-small 3/275    | 66/8294  | 0.37516  | 0.930659 | 0.930659 | 13866/147 |
| KEGG_Pathmmu05146 | Leishmania 3/275   | 67/8294  | 0.384233 | 0.930659 | 0.930659 | 15980/264 |
| KEGG_Pathmmu00266 | Glycine, ser 2/275 | 40/8294  | 0.384631 | 0.930659 | 0.930659 | 12116/762 |
| KEGG_Pathmmu00356 | Tyrosine m 2/275   | 40/8294  | 0.384631 | 0.930659 | 0.930659 | 71724/140 |
| KEGG_Pathmmu05039 | Nicotine ac 2/275  | 40/8294  | 0.384631 | 0.930659 | 0.930659 | 12287/216 |
| KEGG_Pathmmu04664 | Fc epsilon I 3/275 | 68/8294  | 0.393277 | 0.930659 | 0.930659 | 14784/161 |
| KEGG_Pathmmu00866 | Porphyrin 2/275    | 41/8294  | 0.39647  | 0.930659 | 0.930659 | 67417/152 |
| KEGG_Pathmmu00736 | Thiamine n 1/275   | 15/8294  | 0.397227 | 0.930659 | 0.930659 | 11650     |
| KEGG_Pathmmu04946 | Type I diab 3/275  | 70/8294  | 0.411259 | 0.930659 | 0.930659 | 14985/150 |
| KEGG_Pathmmu04626 | Toll-like re 4/275 | 99/8294  | 0.41717  | 0.930659 | 0.930659 | 242519/26 |
| KEGG_Pathmmu04926 | Adipocytok 3/275   | 71/8294  | 0.420189 | 0.930659 | 0.930659 | 384783/19 |

|                   |              |       |          |          |          |          |           |
|-------------------|--------------|-------|----------|----------|----------|----------|-----------|
| KEGG_Pathmmu04925 | Aldosteron   | 4/275 | 100/8294 | 0.424664 | 0.930659 | 0.930659 | 12915/678 |
| KEGG_Pathmmu04020 | Calcium sig  | 7/275 | 187/8294 | 0.426665 | 0.930659 | 0.930659 | 12287/122 |
| KEGG_Pathmmu05218 | Melanoma     | 3/275 | 72/8294  | 0.429074 | 0.930659 | 0.930659 | 14171/141 |
| KEGG_Pathmmu05166 | Human T-c    | 9/275 | 246/8294 | 0.4299   | 0.930659 | 0.930659 | 99152/129 |
| KEGG_Pathmmu03022 | Basal trans  | 2/275 | 44/8294  | 0.431331 | 0.930659 | 0.930659 | 99169/570 |
| KEGG_Pathmmu04140 | Autophagy    | 5/275 | 130/8294 | 0.432991 | 0.930659 | 0.930659 | 67605/384 |
| KEGG_Pathmmu04926 | Relaxin sig  | 5/275 | 131/8294 | 0.439547 | 0.930659 | 0.930659 | 12915/147 |
| KEGG_Pathmmu04068 | FoxO signa   | 5/275 | 132/8294 | 0.446086 | 0.930659 | 0.930659 | 14784/148 |
| KEGG_Pathmmu04971 | Gastric acic | 3/275 | 74/8294  | 0.446696 | 0.930659 | 0.930659 | 67821/123 |
| KEGG_Pathmmu05212 | Pancreatic   | 3/275 | 75/8294  | 0.455426 | 0.930659 | 0.930659 | 13866/270 |
| KEGG_Pathmmu05214 | Glioma       | 3/275 | 75/8294  | 0.455426 | 0.930659 | 0.930659 | 215303/14 |
| KEGG_Pathmmu04141 | Protein prc  | 6/275 | 163/8294 | 0.456466 | 0.930659 | 0.930659 | 12915/131 |
| KEGG_Pathmmu05133 | Pertussis    | 3/275 | 76/8294  | 0.464098 | 0.930659 | 0.930659 | 26416/196 |
| KEGG_Pathmmu05220 | Chronic my   | 3/275 | 76/8294  | 0.464098 | 0.930659 | 0.930659 | 14784/270 |
| KEGG_Pathmmu00565 | Ether lipid  | 2/275 | 47/8294  | 0.465097 | 0.930659 | 0.930659 | 66569/686 |
| KEGG_Pathmmu00230 | Purine met   | 5/275 | 136/8294 | 0.472041 | 0.930659 | 0.930659 | 56248/273 |
| KEGG_Pathmmu05162 | Measles      | 5/275 | 136/8294 | 0.472041 | 0.930659 | 0.930659 | 242519/15 |
| KEGG_Pathmmu00100 | Steroid bio  | 1/275 | 19/8294  | 0.473425 | 0.930659 | 0.930659 | 13121     |
| KEGG_Pathmmu05030 | Cocaine ad   | 2/275 | 48/8294  | 0.476089 | 0.930659 | 0.930659 | 12915/196 |
| KEGG_Pathmmu05145 | Toxoplasm    | 4/275 | 108/8294 | 0.483584 | 0.930659 | 0.930659 | 13063/159 |
| KEGG_Pathmmu04022 | cGMP-PKG     | 6/275 | 168/8294 | 0.485676 | 0.930659 | 0.930659 | 12915/678 |
| KEGG_Pathmmu04621 | NOD-like r   | 6/275 | 168/8294 | 0.485676 | 0.930659 | 0.930659 | 242519/26 |
| KEGG_Pathmmu05164 | Influenza A  | 6/275 | 168/8294 | 0.485676 | 0.930659 | 0.930659 | 13063/242 |
| KEGG_Pathmmu04024 | cAMP signi   | 7/275 | 198/8294 | 0.486198 | 0.930659 | 0.930659 | 239273/67 |
| KEGG_Pathmmu00510 | N-Glycan t   | 2/275 | 49/8294  | 0.486942 | 0.930659 | 0.930659 | 57377/682 |
| KEGG_Pathmmu04979 | Cholester    | 2/275 | 49/8294  | 0.486942 | 0.930659 | 0.930659 | 11808/154 |
| KEGG_Pathmmu00532 | Glycosamir   | 1/275 | 20/8294  | 0.490925 | 0.930659 | 0.930659 | 217119    |
| KEGG_Pathmmu04120 | Ubiquitin n  | 5/275 | 139/8294 | 0.491255 | 0.930659 | 0.930659 | 99152/838 |
| KEGG_Pathmmu00591 | Linoleic aci | 2/275 | 50/8294  | 0.497655 | 0.930659 | 0.930659 | 13077/745 |
| KEGG_Pathmmu04668 | TNF signali  | 4/275 | 110/8294 | 0.497954 | 0.930659 | 0.930659 | 12915/264 |
| KEGG_Pathmmu01521 | EGFR tyros   | 3/275 | 80/8294  | 0.498159 | 0.930659 | 0.930659 | 13866/144 |
| KEGG_Pathmmu00531 | Glycosamir   | 1/275 | 21/8294  | 0.507845 | 0.930659 | 0.930659 | 545291    |
| KEGG_Pathmmu04625 | C-type lect  | 4/275 | 112/8294 | 0.512152 | 0.930659 | 0.930659 | 12042/264 |
| KEGG_Pathmmu05014 | Amyotropt    | 2/275 | 52/8294  | 0.518649 | 0.930659 | 0.930659 | 13063/264 |
| KEGG_Pathmmu03018 | RNA degra    | 3/275 | 83/8294  | 0.522978 | 0.930659 | 0.930659 | 104625/68 |
| KEGG_Pathmmu05010 | Alzheimer    | 6/275 | 175/8294 | 0.525705 | 0.930659 | 0.930659 | 11949/130 |
| KEGG_Pathmmu04146 | Peroxisom    | 3/275 | 84/8294  | 0.531102 | 0.930659 | 0.930659 | 67528/713 |
| KEGG_Pathmmu05410 | Hypertropt   | 3/275 | 84/8294  | 0.531102 | 0.930659 | 0.930659 | 19082/240 |
| KEGG_Pathmmu04670 | Leukocyte    | 4/275 | 115/8294 | 0.533101 | 0.930659 | 0.930659 | 58187/123 |
| KEGG_Pathmmu04350 | TGF-beta s   | 3/275 | 85/8294  | 0.539148 | 0.930659 | 0.930659 | 14313/163 |
| KEGG_Pathmmu04911 | Insulin secr | 3/275 | 85/8294  | 0.539148 | 0.930659 | 0.930659 | 12915/678 |
| KEGG_Pathmmu00900 | Terpenoid    | 1/275 | 23/8294  | 0.540022 | 0.930659 | 0.930659 | 68603     |
| KEGG_Pathmmu04261 | Adrenergic   | 5/275 | 147/8294 | 0.541155 | 0.930659 | 0.930659 | 12915/678 |
| KEGG_Pathmmu04923 | Regulation   | 2/275 | 55/8294  | 0.549028 | 0.930659 | 0.930659 | 384783/22 |
| KEGG_Pathmmu00534 | Glycosamir   | 1/275 | 24/8294  | 0.555316 | 0.930659 | 0.930659 | 217119    |
| KEGG_Pathmmu04977 | Vitamin di   | 1/275 | 24/8294  | 0.555316 | 0.930659 | 0.930659 | 11808     |
| KEGG_Pathmmu05210 | Colorectal   | 3/275 | 88/8294  | 0.562806 | 0.930659 | 0.930659 | 13063/147 |
| KEGG_Pathmmu05310 | Asthma       | 1/275 | 25/8294  | 0.570103 | 0.930659 | 0.930659 | 16163     |

|                   |                    |          |          |          |          |           |
|-------------------|--------------------|----------|----------|----------|----------|-----------|
| KEGG_Pathmmu04722 | Neurotropl4/275    | 121/8294 | 0.573612 | 0.930659 | 0.930659 | 14784/264 |
| KEGG_Pathmmu0024  | Pyrimidine 2/275   | 58/8294  | 0.578041 | 0.930659 | 0.930659 | 20133/218 |
| KEGG_Pathmmu04727 | GABAergic 3/275    | 90/8294  | 0.578164 | 0.930659 | 0.930659 | 12287/147 |
| KEGG_Pathmmu0079  | Folate bios 1/275  | 26/8294  | 0.5844   | 0.930659 | 0.930659 | 11650     |
| KEGG_Pathmmu0031  | Lysine deg 2/275   | 59/8294  | 0.587405 | 0.930659 | 0.930659 | 73582/208 |
| KEGG_Pathmmu0415  | mTOR sign 5/275    | 155/8294 | 0.58868  | 0.930659 | 0.930659 | 67605/749 |
| KEGG_Pathmmu0414  | Lysosome 4/275     | 124/8294 | 0.593115 | 0.930659 | 0.930659 | 11593/252 |
| KEGG_Pathmmu0461  | Platelet act 4/275 | 124/8294 | 0.593115 | 0.930659 | 0.930659 | 14724/264 |
| KEGG_Pathmmu0474  | Phototrans 1/275   | 27/8294  | 0.598223 | 0.930659 | 0.930659 | 14685     |
| KEGG_Pathmmu0495  | Maturity or 1/275  | 27/8294  | 0.598223 | 0.930659 | 0.930659 | 20526     |
| KEGG_Pathmmu0475  | Inflammatc 4/275   | 125/8294 | 0.599499 | 0.930659 | 0.930659 | 74519/155 |
| KEGG_Pathmmu0431  | Wnt signali 5/275  | 160/8294 | 0.616986 | 0.930659 | 0.930659 | 329252/18 |
| KEGG_Pathmmu0413  | Mitophagy 2/275    | 63/8294  | 0.623317 | 0.930659 | 0.930659 | 19697/661 |
| KEGG_Pathmmu0521  | Prostate ca 3/275  | 97/8294  | 0.629185 | 0.930659 | 0.930659 | 13866/147 |
| KEGG_Pathmmu0302  | RNA polyr 1/275    | 30/8294  | 0.637003 | 0.930659 | 0.930659 | 64424     |
| KEGG_Pathmmu0471  | Circadian r 1/275  | 30/8294  | 0.637003 | 0.930659 | 0.930659 | 19082     |
| KEGG_Pathmmu0472  | Serotonerg 4/275   | 132/8294 | 0.64247  | 0.930659 | 0.930659 | 12287/745 |
| KEGG_Pathmmu0491  | Estrogen si 4/275  | 133/8294 | 0.648357 | 0.930659 | 0.930659 | 12915/139 |
| KEGG_Pathmmu0098  | Metabolism 2/275   | 66/8294  | 0.648636 | 0.930659 | 0.930659 | 13077/148 |
| KEGG_Pathmmu0063  | Glyoxylate 1/275   | 31/8294  | 0.649083 | 0.930659 | 0.930659 | 76238     |
| KEGG_Pathmmu0019  | Oxidative r 4/275  | 134/8294 | 0.654181 | 0.930659 | 0.930659 | 11949/749 |
| KEGG_Pathmmu0514  | Chagas dis 3/275   | 101/8294 | 0.656372 | 0.930659 | 0.930659 | 15980/264 |
| KEGG_Pathmmu0472  | Long-term 2/275    | 67/8294  | 0.656772 | 0.930659 | 0.930659 | 14816/201 |
| KEGG_Pathmmu0401  | Ras signali 7/275  | 233/8294 | 0.658952 | 0.930659 | 0.930659 | 13636/141 |
| KEGG_Pathmmu0472  | Dopaminerg 4/275   | 135/8294 | 0.659939 | 0.930659 | 0.930659 | 12915/122 |
| KEGG_Pathmmu0003  | Pentose ph 1/275   | 32/8294  | 0.660762 | 0.930659 | 0.930659 | 110639    |
| KEGG_Pathmmu0421  | Apoptosis 1/275    | 32/8294  | 0.660762 | 0.930659 | 0.930659 | 13063     |
| KEGG_Pathmmu0492  | Glucagon r 3/275   | 102/8294 | 0.662941 | 0.930659 | 0.930659 | 19082/176 |
| KEGG_Pathmmu0492  | Cortisol syr 2/275 | 68/8294  | 0.664756 | 0.930659 | 0.930659 | 12915/122 |
| KEGG_Pathmmu0503  | Amphetam 2/275     | 68/8294  | 0.664756 | 0.930659 | 0.930659 | 11838/129 |
| KEGG_Pathmmu0522  | Hepatocell 5/275   | 171/8294 | 0.675067 | 0.935126 | 0.935126 | 14784/148 |
| KEGG_Pathmmu0520  | Proteoglyc 6/275   | 204/8294 | 0.675168 | 0.935126 | 0.935126 | 13866/147 |
| KEGG_Pathmmu0406  | HIF-1 signc 3/275  | 105/8294 | 0.682103 | 0.937808 | 0.937808 | 13866/159 |
| KEGG_Pathmmu0411  | p53 signali 2/275  | 71/8294  | 0.687816 | 0.937808 | 0.937808 | 13063/579 |
| KEGG_Pathmmu0341  | Base excisic 1/275 | 35/8294  | 0.693525 | 0.937808 | 0.937808 | 18970     |
| KEGG_Pathmmu0492  | Parathyroic 3/275  | 107/8294 | 0.694423 | 0.937808 | 0.937808 | 12915/173 |
| KEGG_Pathmmu0452  | Adherens j 2/275   | 72/8294  | 0.695209 | 0.937808 | 0.937808 | 12385/138 |
| KEGG_Pathmmu0501  | Parkinson c 4/275  | 144/8294 | 0.708833 | 0.947301 | 0.947301 | 11949/130 |
| KEGG_Pathmmu0510  | Bacterial in 2/275 | 74/8294  | 0.709561 | 0.947301 | 0.947301 | 12385/710 |
| KEGG_Pathmmu0062  | Pyruvate r 1/275   | 38/8294  | 0.723135 | 0.951327 | 0.951327 | 76238     |
| KEGG_Pathmmu0472  | Cholinergic 3/275  | 113/8294 | 0.729219 | 0.951327 | 0.951327 | 12287/147 |
| KEGG_Pathmmu0520  | Transcriptic 5/275 | 183/8294 | 0.731455 | 0.951327 | 0.951327 | 13198/171 |
| KEGG_Pathmmu0426  | Cardiac mt 2/275   | 78/8294  | 0.736576 | 0.951327 | 0.951327 | 67821/205 |
| KEGG_Pathmmu0411  | Oocyte me 3/275    | 116/8294 | 0.74542  | 0.951327 | 0.951327 | 99152/208 |
| KEGG_Pathmmu0344  | Homologo 1/275     | 41/8294  | 0.749893 | 0.951327 | 0.951327 | 237911    |
| KEGG_Pathmmu0421  | Ferroptosis 1/275  | 41/8294  | 0.749893 | 0.951327 | 0.951327 | 67547     |
| KEGG_Pathmmu0521  | Bladder ca 1/275   | 41/8294  | 0.749893 | 0.951327 | 0.951327 | 13866     |
| KEGG_Pathmmu0492  | Oxytocin si 4/275  | 153/8294 | 0.752431 | 0.951327 | 0.951327 | 215303/21 |

|                                                                                |          |          |          |          |           |
|--------------------------------------------------------------------------------|----------|----------|----------|----------|-----------|
| KEGG_Pathmmu04151PI3K-Akt si10/275                                             | 358/8294 | 0.756134 | 0.951327 | 0.951327 | 12915/136 |
| KEGG_Pathmmu0342C Nucleotide 1/275                                             | 43/8294  | 0.766284 | 0.951327 | 0.951327 | 22590     |
| KEGG_Pathmmu04962 Vasopressin 1/275                                            | 43/8294  | 0.766284 | 0.951327 | 0.951327 | 68097     |
| KEGG_Pathmmu04512 ECM-receptor 2/275                                           | 83/8294  | 0.767315 | 0.951327 | 0.951327 | 14724/329 |
| KEGG_Pathmmu04012 ErbB signal 2/275                                            | 84/8294  | 0.773076 | 0.951327 | 0.951327 | 13866/147 |
| KEGG_Pathmmu04152 AMPK signal 3/275                                            | 126/8294 | 0.793898 | 0.951327 | 0.951327 | 67605/384 |
| KEGG_Pathmmu04742 Taste trans 2/275                                            | 88/8294  | 0.794895 | 0.951327 | 0.951327 | 14816/387 |
| KEGG_Pathmmu0451C Focal adhesion 5/275                                         | 199/8294 | 0.795165 | 0.951327 | 0.951327 | 13866/147 |
| KEGG_Pathmmu0014C Steroid hormone 2/275                                        | 89/8294  | 0.800053 | 0.951327 | 0.951327 | 208665/13 |
| KEGG_Pathmmu05414 Dilated cardiomyopathy 2/275                                 | 89/8294  | 0.800053 | 0.951327 | 0.951327 | 24051/205 |
| KEGG_Pathmmu04912 GnRH signaling 2/275                                         | 90/8294  | 0.805096 | 0.951327 | 0.951327 | 14784/264 |
| KEGG_Pathmmu0083C Retinol metabolism 2/275                                     | 91/8294  | 0.810026 | 0.951327 | 0.951327 | 71724/130 |
| KEGG_Pathmmu05032 Morphine signaling 2/275                                     | 92/8294  | 0.814845 | 0.951327 | 0.951327 | 12287/147 |
| KEGG_Pathmmu0027C Cysteine synthesis 1/275                                     | 50/8294  | 0.815668 | 0.951327 | 0.951327 | 12116     |
| KEGG_Pathmmu0304C Spliceosome 3/275                                            | 133/8294 | 0.823071 | 0.951327 | 0.951327 | 20630/141 |
| KEGG_Pathmmu05204 Chemical carcinogenesis 2/275                                | 94/8294  | 0.824157 | 0.951327 | 0.951327 | 13077/148 |
| KEGG_Pathmmu0401E Rap1 signaling 5/275                                         | 209/8294 | 0.828594 | 0.951327 | 0.951327 | 13636/141 |
| KEGG_Pathmmu0464C Hematopoiesis 2/275                                          | 95/8294  | 0.828654 | 0.951327 | 0.951327 | 14724/173 |
| KEGG_Pathmmu0455C Signaling pathway 3/275                                      | 137/8294 | 0.838112 | 0.951327 | 0.951327 | 14784/163 |
| KEGG_Pathmmu0471E Circadian rhythm 2/275                                       | 98/8294  | 0.841531 | 0.951327 | 0.951327 | 12291/147 |
| KEGG_Pathmmu04217 Necroptosis 4/275                                            | 177/8294 | 0.844173 | 0.951327 | 0.951327 | 242519/15 |
| KEGG_Pathmmu04371 Apelin signaling 3/275                                       | 139/8294 | 0.845212 | 0.951327 | 0.951327 | 14708/190 |
| KEGG_Pathmmu0481C Regulation of gene expression 5/275                          | 215/8294 | 0.846445 | 0.951327 | 0.951327 | 14171/141 |
| KEGG_Pathmmu0491C Insulin signaling 3/275                                      | 140/8294 | 0.84866  | 0.951327 | 0.951327 | 14784/384 |
| KEGG_Pathmmu0028C Valine, leucine and isoleucine biosynthesis 1/275            | 56/8294  | 0.849628 | 0.951327 | 0.951327 | 71724     |
| KEGG_Pathmmu0408C Neuroactive ligand-receptor interaction 7/275                | 289/8294 | 0.850336 | 0.951327 | 0.951327 | 12267/148 |
| KEGG_Pathmmu0516E Human papillomavirus infection 9/275                         | 361/8294 | 0.853133 | 0.951327 | 0.951327 | 74915/147 |
| KEGG_Pathmmu0436C Axon guidance 4/275                                          | 180/8294 | 0.853348 | 0.951327 | 0.951327 | 13636/672 |
| KEGG_Pathmmu0491E Ovarian steroidogenesis 1/275                                | 57/8294  | 0.854647 | 0.951327 | 0.951327 | 74519     |
| KEGG_Pathmmu0541E Fluid shear stress and endothelial cell mechanobiology 3/275 | 143/8294 | 0.858607 | 0.951327 | 0.951327 | 14867/264 |
| KEGG_Pathmmu0437C VEGF signaling 1/275                                         | 58/8294  | 0.8595   | 0.951327 | 0.951327 | 26416     |
| KEGG_Pathmmu0514E Amoebiasis 2/275                                             | 106/8294 | 0.871699 | 0.958202 | 0.958202 | 19697/207 |
| KEGG_Pathmmu0473C Long-term depression 1/275                                   | 61/8294  | 0.873111 | 0.958202 | 0.958202 | 14816     |
| KEGG_Pathmmu05217 Basal cell carcinoma 1/275                                   | 63/8294  | 0.881446 | 0.963269 | 0.963269 | 27015     |
| KEGG_Pathmmu0501E Huntingtin 4/275                                             | 194/8294 | 0.890337 | 0.968896 | 0.968896 | 11949/130 |
| KEGG_Pathmmu05211 Renal cell carcinoma 1/275                                   | 68/8294  | 0.899975 | 0.975052 | 0.975052 | 14784     |
| KEGG_Pathmmu04062 Chemokine signaling 4/275                                    | 200/8294 | 0.903524 | 0.975052 | 0.975052 | 14708/147 |
| KEGG_Pathmmu00562 Inositol phosphate signaling 1/275                           | 73/8294  | 0.915617 | 0.979586 | 0.979586 | 97287     |
| KEGG_Pathmmu04071 Sphingolipid metabolism 2/275                                | 122/8294 | 0.916813 | 0.979586 | 0.979586 | 26416/196 |
| KEGG_Pathmmu0411C Cell cycle 2/275                                             | 123/8294 | 0.919071 | 0.979586 | 0.979586 | 99152/196 |
| KEGG_Pathmmu0123C Biosynthesis of amino acids 1/275                            | 78/8294  | 0.92882  | 0.981645 | 0.981645 | 110639    |
| KEGG_Pathmmu0497C Salivary secretion 1/275                                     | 78/8294  | 0.92882  | 0.981645 | 0.981645 | 67821     |
| KEGG_Pathmmu0406C Cytokine-cytokine receptor interaction 6/275                 | 296/8294 | 0.932373 | 0.981645 | 0.981645 | 242519/15 |
| KEGG_Pathmmu0532E Rheumatoid arthritis 1/275                                   | 83/8294  | 0.939964 | 0.984208 | 0.984208 | 74915     |
| KEGG_Pathmmu0059C Arachidonic acid metabolism 1/275                            | 89/8294  | 0.951065 | 0.984208 | 0.984208 | 74519     |
| KEGG_Pathmmu04072 Phospholipid metabolism 2/275                                | 147/8294 | 0.958729 | 0.984208 | 0.984208 | 14784/148 |
| KEGG_Pathmmu0301E mRNA surveillance 1/275                                      | 96/8294  | 0.961457 | 0.984208 | 0.984208 | 241989    |
| KEGG_Pathmmu00564 Glycerophospholipid metabolism 1/275                         | 97/8294  | 0.96275  | 0.984208 | 0.984208 | 381925    |

|                                    |          |          |          |          |           |
|------------------------------------|----------|----------|----------|----------|-----------|
| KEGG_Pathmmu0503 Alcoholism 3/275  | 199/8294 | 0.963807 | 0.984208 | 0.984208 | 12915/147 |
| KEGG_Pathmmu0407 Phosphatic 1/275  | 98/8294  | 0.964    | 0.984208 | 0.984208 | 97287     |
| KEGG_Pathmmu05231 Choline me 1/275 | 99/8294  | 0.965208 | 0.984208 | 0.984208 | 14784     |
| KEGG_Pathmmu0493 Cushing sy 2/275  | 158/8294 | 0.969912 | 0.985126 | 0.985126 | 12915/122 |
| KEGG_Pathmmu0491 Thyroid ho 1/275  | 115/8294 | 0.979859 | 0.986836 | 0.986836 | 67821     |
| KEGG_Pathmmu0300 Ribosome l 1/275  | 116/8294 | 0.980536 | 0.986836 | 0.986836 | 100019    |
| KEGG_Pathmmu0120 Carbon me 1/275   | 120/8294 | 0.983026 | 0.986836 | 0.986836 | 110639    |
| KEGG_Pathmmu0439 Hippo sign 1/275  | 154/8294 | 0.99471  | 0.99471  | 0.99471  | 12385     |

Count

5  
5  
5  
62  
75  
39  
6  
10  
28  
5  
16  
24  
48  
34  
13  
11  
34  
63  
52  
41  
19  
32  
74  
9  
4  
5  
25  
48  
54  
76  
27  
22  
23  
24  
31  
31  
21  
21  
12  
73  
23  
24  
3  
3  
3  
52

7  
5  
45  
76  
73  
33  
34  
21  
76  
6  
26  
55  
42  
68  
45  
15  
26  
42  
24  
29  
46  
13  
45  
60  
11  
61  
51  
15  
7  
22  
10  
37  
8  
8  
9  
59  
29  
31  
15  
64  
26  
6  
6  
6  
37  
37  
22  
54



19  
62  
69  
18  
32  
8  
8  
8  
11  
23  
19  
73  
38  
57  
50  
20  
45  
49  
67  
17  
6  
6  
52  
61  
4  
4  
4  
30  
8  
27  
7  
63  
5  
5  
5  
5  
49  
16  
73  
53  
21  
53  
36  
9  
68  
3  
3  
3



7  
6  
6  
6  
63  
33  
16  
16  
16  
9  
9  
13  
12  
10  
11  
11  
55  
41  
50  
31  
36  
26  
8  
33  
22  
37  
9  
25  
7  
7  
7  
7  
10  
29  
48  
5  
31  
26  
45  
18  
13  
40  
15  
54  
19  
20  
47  
31



2  
2  
2  
2  
2  
2  
2  
2  
2  
2  
2  
2  
2  
2  
2  
2  
2  
2  
2  
2  
2  
2  
2  
2  
2  
2  
2  
2  
2  
2  
2  
2  
2  
7  
7  
7  
42  
56  
12  
12  
14  
14  
48  
41  
19  
59  
11  
40  
35  
15  
6  
10

13  
5  
5  
5  
5  
5  
30  
39  
63  
64  
21  
20  
20  
38  
14  
14  
50  
28  
28  
42  
39  
30  
47  
15  
38  
26  
7  
7  
7  
7  
13  
21  
21  
56  
40  
8  
8  
38  
14  
29  
69  
40  
37  
37  
21  
21  
25  
16

66  
6  
58  
60  
43  
4  
4  
4  
4  
4  
4  
4  
4  
4  
40  
23  
32  
32  
58  
5  
5  
5  
5  
5  
5  
33  
50  
10  
10  
10  
31  
31  
15  
15  
24  
57  
12  
12  
12  
7  
7  
34  
16  
16  
41  
41  
35  
62

33  
58  
25  
25  
13  
50  
3  
3  
3  
3  
3  
3  
3  
3  
3  
3  
3  
3  
3  
3  
3  
14  
14  
32  
35  
15  
33  
46  
17  
17  
17  
31  
37  
34  
51  
43  
6  
6  
6  
24  
36  
13  
9  
9  
14  
7  
7  
7  
7



15  
11  
11  
11  
39  
8  
8  
8  
8  
8  
16  
37  
61  
5  
5  
5  
5  
35  
35  
27  
53  
19  
10  
64  
13  
13  
42  
4  
4  
4  
46  
15  
40  
23  
27  
25  
19  
19  
6  
6  
6  
6  
39  
12  
12  
8  
8  
8

8  
40  
40  
18  
17  
7  
10  
10  
20  
26  
24  
44  
47  
49  
29  
18  
21  
27  
34  
9  
9  
23  
17  
17  
42  
53  
12  
12  
5  
5  
5  
5  
5  
5  
5  
5  
14  
22  
33  
68  
8  
8  
30  
66  
60  
10  
21  
25





4  
15  
12  
12  
12  
13  
61  
28  
9  
9  
9  
9  
18  
48  
29  
29  
62  
20  
17  
17  
10  
42  
19  
8  
8  
54  
15  
15  
34  
11  
35  
51  
12  
12  
12  
13  
22  
22  
32  
7  
5  
5  
5  
5  
5  
5  
5  
5

53  
17  
17  
28  
28  
28  
59  
25  
6  
6  
6  
6  
6  
6  
6  
6  
6  
21  
30  
15  
10  
61  
14  
14  
14  
25  
60  
29  
29  
13  
13  
13  
12  
17  
26  
8  
8  
8  
57  
19  
16  
16  
36  
51  
15  
4  
4

4  
4  
4  
4  
4  
4  
4  
4  
4  
4  
4  
4  
4  
4  
9  
9  
9  
9  
26  
23  
14  
7  
7  
7  
7  
7  
7  
7  
7  
32  
13  
10  
10  
10  
24  
37  
50  
12  
11  
11  
11  
11  
11  
29  
3  
3  
3  
3  
3  
3  
3

3  
3  
3  
3  
3  
3  
3  
3  
3  
3  
3  
3  
3  
3  
3  
3  
3  
16  
6  
6  
6  
6  
6  
26  
5  
5  
5  
5  
43  
41  
35  
15  
15  
15  
59  
8  
29  
19  
30  
43  
22  
32  
13  
9  
9  
9  
48  
16  
20



27  
12  
12  
18  
10  
10  
11  
11  
11  
11  
51  
15  
7  
7  
7  
7  
40  
32  
25  
38  
19  
17  
47  
26  
63  
20  
20  
28  
29  
16  
18  
30  
30  
13  
60  
60  
8  
46  
55  
6  
6  
6  
6  
6  
25  
12  
54  
4







3  
3  
3  
3  
3  
3  
3  
3  
3  
3  
3  
3  
3  
3  
22  
23  
6  
6  
6  
6  
6  
6  
13  
24  
59  
20  
35  
21  
21  
18  
14  
23  
11  
11  
11  
7  
7  
7  
7  
7  
7  
5  
5  
5  
5  
5  
5  
5  
5

5  
5  
5  
10  
4  
4  
4  
4  
4  
4  
4  
4  
4  
4  
4  
4  
4  
4  
4  
4  
4  
4  
4  
4  
4  
20  
8  
8  
8  
8  
30  
17  
40  
9  
9  
9  
9  
9  
9  
58  
15  
12  
12  
40  
25  
16  
16  
31

48  
27  
29  
29  
28  
14  
20  
20  
37  
6  
6  
6  
6  
6  
6  
11  
17  
17  
35  
22  
13  
13  
13  
13  
10  
24  
29  
26  
27  
7  
7  
7  
9  
9  
9  
9  
55  
8  
8  
8  
8  
8  
8  
8  
16  
20  
20  
40





3  
3  
3  
3  
3  
3  
3  
3  
3  
3  
3  
20  
20  
10  
30  
22  
29  
4  
4  
4  
4  
4  
4  
4  
4  
4  
4  
4  
4  
4  
4  
4  
4  
4  
4  
4  
4  
27  
27  
26  
14  
35  
6  
6  
6  
6  
6  
6  
12  
12







11  
11  
17  
8  
8  
8  
8  
6  
6  
6  
6  
6  
6  
7  
7  
7  
7  
7  
7  
7  
7  
7  
37  
14  
14  
19  
19  
20  
46  
43  
36  
15  
15  
12  
12  
12  
10  
10  
38  
4  
4  
4  
4  
4  
4  
4  
4  
4  
4  
4





















3  
3  
3  
3  
14  
34  
29  
8  
8  
8  
8  
8  
8  
15  
27  
12  
16  
16  
16  
5  
5  
5  
5  
5  
5  
5  
35  
24  
10  
10  
7  
7  
7  
7  
7  
23  
18  
18  
22  
48  
6  
6  
6  
20  
20  
13  
13  
13

32  
32  
27  
27  
14  
38  
26  
9  
9  
9  
9  
9  
15  
30  
30  
16  
22  
36  
17  
17  
18  
18  
18  
20  
12  
12  
12  
12  
38  
48  
8  
8  
8  
56  
26  
26  
10  
13  
13  
30  
25  
4  
4  
4  
4  
4  
4  
4





45

2

2

2

2

2

2

2

2

2

2

2

2

2

2

2

2

2

2

2

2

2

2

2

2

2

2

2

2

2

2

2

2

2

2

2

2

2

2

2

2

2

2

2

2

2

2

2

2

2

2  
2  
2  
2  
2  
2  
2  
2  
2  
2  
2  
2  
2  
2  
2  
2  
2  
2  
2  
2  
2  
2  
2  
2  
2  
2  
2  
2  
2  
2  
2  
2  
2  
2  
2  
2  
2  
2  
2  
2  
13  
13  
13  
42  
22  
60  
21  
14  
14  
46  
10  
10  
20  
20  
20  
15  
15

15  
26  
3  
3  
3  
3  
3  
3  
3  
3  
3  
3  
3  
3  
3  
3  
3  
3  
3  
3  
3  
3  
3  
3  
3  
3  
3  
3  
3  
3  
3  
3  
3  
3  
3  
3  
3  
3  
3  
3  
3  
3  
3  
8  
8  
8  
16  
16  
16  
18  
17  
17  
11  
11  
23  
48

22  
12  
12  
12  
12  
12  
12  
7  
7  
7  
9  
20  
13  
13  
13  
13  
19  
44  
44  
17  
16  
6  
6  
6  
6  
6  
6  
6  
6  
6  
36  
36  
10  
10  
49  
33  
33  
4  
4  
4  
4  
4  
4  
4  
4  
4  
4  
4  
4  
4

4  
4  
4  
4  
22  
26  
5  
5  
5  
5  
5  
5  
5  
5  
5  
5  
5  
5  
8  
8  
8  
8  
8  
29  
20  
19  
36  
13  
13  
17  
27  
14  
16  
9  
9  
9  
41  
7  
7  
7  
7  
7  
7  
7  
10  
24  
18  
18







4  
4  
4  
4  
4  
4  
4  
4  
4  
4  
4  
4  
4  
4  
4  
4  
4  
17  
17  
10  
10  
10  
25  
45  
16  
16  
16  
7  
7  
11  
15  
15  
15  
15  
12  
12  
12  
12  
12  
12  
14  
13  
13  
34  
23  
26  
2  
2  
2





6  
6  
6  
6  
6  
6  
6  
6  
9  
16  
16  
29  
41  
10  
10  
10  
10  
10  
10  
35  
13  
13  
13  
11  
11  
11  
12  
12  
12  
44  
30  
25  
22  
22  
36  
58  
18  
18  
18  
7  
7  
7  
7  
7  
7  
5  
5  
5



3  
3  
3  
3  
3  
3  
3  
3  
3  
3  
3  
3  
3  
3  
3  
3  
3  
3  
3  
3  
3  
3  
3  
3  
13  
35  
12  
12  
12  
12  
12  
12  
12  
12  
10  
10  
10  
11  
11  
6  
6  
6  
6  
6  
6  
6  
6  
28  
36  
46





















1  
1  
1  
1  
1  
1  
1  
1  
1  
1  
1  
1  
1  
1  
1  
1  
1  
1  
1  
1  
1  
1  
1  
1  
1  
1  
1  
1  
1  
1  
1  
1  
1  
1  
1  
1  
1  
1  
1  
1  
1  
1  
19  
39  
28  
18  
18  
18  
40  
33  
43  
6  
6  
6  
6  
6  
6  
6  
6  
6







2  
2  
2  
42  
12  
19  
16  
16  
7  
7  
7  
7  
7  
7  
35  
11  
11  
11  
11  
59  
10  
10  
10  
8  
9  
9  
9  
9  
9  
9  
9  
9  
9  
15  
15  
15  
18  
18  
18  
25  
27  
54  
3  
3  
3  
3  
3  
3  
3

3  
3  
3  
3  
3  
3  
3  
3  
3  
3  
3  
3  
3  
3  
3  
3  
3  
3  
3  
3  
3  
3  
3  
3  
32  
32  
14  
14  
14  
14  
14  
14  
17  
13  
13  
41  
5  
5  
5  
5  
16  
16  
16  
39  
12  
23  
53

15  
15  
11  
35  
35  
20  
20  
28  
6  
6  
6  
6  
6  
33  
24  
10  
10  
10  
59  
36  
31  
14  
14  
14  
9  
9  
9  
7  
7  
7  
7  
7  
7  
7  
7  
7  
7  
60  
8  
8  
8  
8  
8  
8  
13  
13  
13  
16  
38  
33

18  
18  
18  
4  
4  
4  
4  
4  
4  
4  
4  
4  
4  
4  
4  
4  
4  
4  
4  
4  
24  
22  
22  
15  
43  
47  
11  
11  
11  
11  
11  
11  
11  
11  
19  
14  
10  
10  
39  
16  
5  
5  
5  
5  
5  
5  
5  
5  
31



3  
3  
3  
3  
3  
3  
3  
3  
3  
3  
3  
3  
3  
3  
3  
3  
3  
3  
3  
3  
3  
3  
3  
3  
3  
3  
3  
12  
12  
50  
36  
23  
23  
17  
21  
19  
28  
11  
11  
41  
16  
2  
2  
2  
2  
2  
2  
2  
2  
2  
2  
2





2  
2  
2  
2  
2  
2  
2  
2  
2  
2  
2  
2  
2  
2  
2  
2  
2  
2  
2  
2  
2  
2  
2  
2  
2  
2  
2  
2  
2  
2  
2  
2  
2  
2  
2  
2  
2  
2  
2  
2  
27  
10  
10  
25  
13  
37  
21  
9  
9  
17  
35  
29  
4  
4  
4  
4  
4  
4  
4  
4  
4  
4

4  
4  
4  
4  
4  
8  
8  
8  
8  
8  
20  
7  
7  
7  
7  
7  
7  
18  
18  
5  
5  
5  
5  
5  
5  
5  
5  
5  
5  
5  
5  
5  
5  
5  
5  
5  
5  
5  
11  
11  
11  
6  
6  
6  
6  
6  
6  
6  
23  
23



3  
3  
3  
3  
3  
3  
3  
3  
3  
3  
3  
3  
3  
3  
3  
3  
3  
34  
17  
17  
13  
13  
35  
7  
7  
7  
7  
7  
7  
7  
7  
49  
32  
32  
20  
36  
10  
23  
46  
37  
6  
6  
6  
6  
6  
6  
4  
4  
4  
4  
4





















7  
7  
7  
17  
23  
27  
15  
15  
9  
9  
9  
6  
6  
6  
6  
6  
6  
6  
6  
6  
6  
6  
13  
13  
32  
18  
18  
11  
11  
51  
16  
22  
5  
5  
5  
5  
5  
5  
5  
5  
5  
5  
3  
3  
3  
3  
3  
3  
3  
3





4  
4  
4  
4  
36  
12  
12  
12  
12  
17  
10  
10  
24  
21  
21  
21  
15  
7  
7  
7  
7  
7  
7  
7  
7  
13  
16  
16  
11  
11  
11  
11  
11  
11  
11  
23  
23  
32  
24  
47  
6  
6  
6  
6  
6  
6  
12  
12  
10

10  
10  
8  
8  
8  
8  
8  
32  
19  
13  
16  
5  
5  
5  
5  
5  
5  
5  
5  
5  
41  
11  
11  
11  
9  
7  
7  
7  
7  
4  
4  
4  
4  
4  
4  
4  
4  
4  
4  
4  
4  
4  
4  
4  
22  
22  
2  
2  
2  
2  
2  
2  
2



2  
2  
2  
2  
2  
2  
2  
2  
2  
2  
2  
2  
15  
15  
19  
3  
3  
3  
3  
3  
3  
3  
3  
3  
3  
3  
3  
3  
3  
3  
3  
3  
3  
3  
3  
3  
3  
3  
3  
3  
3  
3  
3  
3  
3  
3  
3  
3  
3  
3  
3  
3  
16  
16  
10  
10  
10  
10  
10



10  
10  
10  
10  
10  
53  
23  
18  
41  
14  
14  
32  
25  
8  
8  
8  
4  
4  
4  
4  
4  
4  
4  
4  
4  
4  
4  
4  
4  
4  
4  
4  
4  
4  
4  
4  
4  
4  
4  
4  
4  
4  
4  
35  
6  
6  
6  
6  
6  
6  
6  
16  
1  
1  
1

















3  
3  
3  
3  
3  
3  
3  
3  
3  
3  
3  
3  
14  
10  
10  
10  
10  
7  
7  
7  
7  
7  
7  
7  
15  
15  
5  
5  
5  
5  
5  
5  
5  
5  
5  
5  
11  
11  
8  
8  
17  
2  
2  
2  
2  
2  
2  
2  
2  
2  
2



2  
2  
2  
2  
2  
2  
2  
2  
2  
2  
2  
2  
2  
2  
2  
2  
2  
37  
25  
12  
12  
18  
18  
13  
13  
9  
9  
9  
6  
6  
6  
6  
6  
6  
14  
15  
23  
10  
10  
10  
40  
4  
4  
4  
4  
4  
4  
4  
4  
4  
4



4  
4  
4  
4  
4  
16  
27  
17  
17  
17  
11  
11  
7  
7  
7  
7  
7  
7  
7  
7  
7  
18  
19  
12  
13  
8  
8  
8  
22  
24  
5  
5  
5  
5  
5  
5  
5  
5  
5  
5  
15  
15  
9  
9  
9  
16  
34  
36  
3  
3

3  
3  
3  
3  
3  
3  
3  
3  
3  
3  
3  
3  
3  
3  
3  
3  
3  
10  
10  
10  
19  
20  
6  
6  
21  
22  
12  
12  
27  
13  
32  
15  
16  
8  
8  
8  
8  
17  
4  
4  
4  
4  
4  
4  
4  
4  
4  
4



2  
2  
2  
2  
2  
2  
2  
2  
2  
2  
2  
2  
2  
2  
2  
2  
2  
2  
2  
2  
11  
11  
5  
5  
5  
5  
5  
5  
5  
5  
12  
13  
14  
41  
16  
17  
17  
38  
6  
6  
6  
6  
19  
21  
22  
23  
24  
24  
7  
7

7  
7  
7  
7

47  
8  
8  
8  
9  
3  
3  
3  
3  
3  
3  
3  
3  
3  
3  
3  
3  
3  
3  
3  
3  
3  
3  
3  
3  
3  
3  
3  
3  
3  
3  
3  
3  
3  
3  
3  
3  
3  
3  
3  
3  
3  
3  
3  
3

10  
10  
10  
10  
11  
11  
12  
1  
1  
1





















18  
18  
16  
16  
15  
15  
15  
14  
14  
22  
11  
54  
10  
19  
9  
8  
8  
26  
7  
7  
7  
7  
6  
6  
6  
15  
5  
5  
5  
5  
5  
5  
5  
13  
4  
4  
4  
4  
4  
4  
4  
4  
19  
11  
11  
3  
3  
3  
3  
3

















8  
8  
21  
16  
7  
7  
7  
7  
7  
11  
3  
3  
3  
3  
3  
3  
3  
3  
3  
3  
3  
3  
3  
3  
3  
3  
3  
3  
3  
3  
3  
3  
3  
3  
3  
3  
3  
3  
3  
3  
3  
3  
3  
3  
3  
3  
3  
3  
3  
15  
10  
6  
6  
6  
6  
6  
6  
28  
14  
14  
18  
27  
36  
13  
13  
13  
13





2  
2  
2  
2  
8  
8  
8  
8  
8  
24  
24  
47  
15  
19  
23  
11  
11  
14  
7  
7  
7  
4  
4  
4  
4  
4  
4  
4  
4  
4  
4  
4  
4  
4  
4  
4  
4  
4  
4  
4  
4  
4  
6  
6  
6  
48  
3  
3  
3  
3  
3  
3  
3  
3  
3









1  
1  
1  
1  
1  
1  
1  
1  
1  
1  
1  
1  
1  
1  
1  
10  
10  
13  
23  
7  
7  
7  
7  
22  
15  
9  
4  
4  
4  
4  
4  
4  
4  
4  
4  
4  
4  
4  
4  
4  
14  
6  
6  
6  
6  
6  
6  
11  
11  
20







3  
3  
3  
11  
11  
11  
13  
37  
6  
6  
6  
8  
15  
46  
10  
10  
10  
10  
20  
4  
4  
4  
4  
4  
4  
4  
4  
4  
4  
4  
4  
19  
13  
13  
5  
5  
5  
5  
20  
40  
10  
30  
8  
12  
12  
2  
2  
2  
2









1  
1  
1  
1  
1  
1  
1  
1  
1  
1  
1  
1  
1  
1  
1  
1  
1  
1  
11  
45  
22  
17  
7  
7  
4  
4  
4  
4  
4  
4  
4  
4  
4  
4  
4  
4  
4  
4  
5  
5  
5  
5  
5  
5  
5  
5  
5  
5  
5  
18  
8  
8  
13  
6  
6  
6  
6  
6  
31  
9  
9  
9  
18



2  
2  
2  
2  
2  
2  
2  
2  
2  
2  
2  
2  
2  
2  
2  
2  
2  
2  
11  
5  
5  
5  
5  
18  
20  
9  
9  
9  
9  
6  
6  
6  
6  
6  
6  
10  
10  
7  
13  
31  
11  
26  
1  
1  
1  
1  
1  
1  
1  
1





















4  
4  
4  
4  
4  
4  
4  
25  
10  
10  
11  
11  
16  
3  
3  
3  
3  
3  
3  
3  
3  
3  
3  
3  
3  
17  
7  
7  
8  
6  
6  
10  
5  
5  
5  
11  
4  
4  
4  
4  
4  
13  
2  
2  
2  
2  
2  
2  
2  
2







8  
13  
6  
6  
6  
15  
21  
5  
2  
2  
2  
2  
2  
2  
2  
2  
2  
2  
2  
2  
2  
2  
2  
2  
2  
2  
2  
2  
2  
2  
2  
2  
2  
2  
2  
2  
2  
2  
3  
3  
3  
3  
3  
3  
3  
3  
3  
3  
3  
3  
3  
3  
3  
3  
3  
3  
3  
11  
9  
14  
14  
4  
4  
4  
4









2  
2  
2  
2  
2  
4  
4  
4  
10  
9  
9  
8  
7  
7  
13  
12  
15  
15  
16  
9  
36  
3  
3  
3  
3  
3  
3  
3  
3  
3  
3  
3  
3  
3  
3  
3  
3  
8  
4  
4  
4  
4  
38  
7  
25  
5  
5  
5  
5  
5  
5





1  
1  
1  
1  
1  
1  
1  
1  
1  
1  
1  
6  
6  
6  
8  
19  
49  
4  
4  
4  
7  
7  
7  
3  
3  
3  
3  
3  
3  
3  
3  
3  
3  
3  
3  
5  
5  
5  
9  
20  
13  
13  
13  
28  
2  
2  
2  
2  
2  
2  
2  
2





31  
7  
7  
7  
9  
18  
8  
2  
2  
2  
2  
2  
2  
2  
2  
2  
2  
2  
2  
2  
2  
2  
2  
2  
2  
2  
5  
5  
5  
4  
45  
6  
3  
3  
3  
3  
3  
9  
18  
7  
7  
16  
15  
18  
5  
5  
5  
17  
12  
4  
4  
4  
4  
4









1  
1  
1  
1  
1  
1  
1  
1  
1  
1  
1  
1  
1  
1  
1  
1  
1  
1  
1  
1  
1  
1  
1  
1  
1  
1  
1  
1  
1  
1  
1  
1  
1  
1  
1  
1  
1  
1  
1  
19  
8  
4  
4  
4  
4  
4  
4  
4  
4  
4  
9  
20  
15  
15  
6  
6  
5  
5  
3  
3  
3  
3  
3  
3  
8  
11  
20





1  
1  
1  
1  
1  
1  
1  
1  
1  
1  
1  
1  
1  
1  
1  
1  
1  
1  
1  
1  
1  
1  
1  
1  
1  
1  
1  
1  
1  
1  
1  
1  
1  
1  
1  
18  
15  
5  
5  
2  
2  
2  
2  
2  
2  
2  
2  
2  
2  
2  
2  
2  
2  
2  
2  
2  
2  
8  
42  
7  
7  
7  
7  
10  
6  
4  
3  
3  
3  
22  
18



13  
4  
4  
10  
14  
14  
2  
2  
2  
2  
5  
3  
1  
1  
1  
1  
1  
1  
1  
1  
1  
1  
1  
1  
1  
1  
1  
1  
1  
1  
1  
1  
1  
1  
1  
36  
10  
11  
5  
3  
3  
2  
2  
2  
2  
6  
10  
8  
7  
7  
1





2  
2  
2  
15  
6  
34  
20  
3  
3  
3  
3  
6  
14  
1  
1  
1  
1  
1  
1  
2  
2  
8  
8  
3  
3  
27  
2  
2  
2  
1  
1  
1  
1  
1  
1  
1  
1  
1  
1  
1  
3  
3  
3  
12  
4  
4  
34  
2  
16  
1

1  
1  
1  
1  
1  
1  
1  
1  
1  
1  
1  
6  
8  
2  
2  
33  
10  
1  
1  
1  
1  
1  
1  
1  
1  
1  
2  
3  
3  
20  
1  
1  
1  
2  
2  
2  
2  
2  
2  
6  
11  
15  
20  
2  
2  
2  
1  
1  
1  
1  
1

1  
1  
1  
1  
1  
1  
5  
6  
6  
2  
1  
1  
1  
1  
1  
1  
6  
3  
23  
4  
2  
2  
9  
10  
6  
1  
1  
1  
1  
8  
9  
4  
2  
2  
2  
3  
3  
3  
5  
1  
1  
1  
1  
1  
1  
2  
3  
28

1  
1  
1  
2  
2  
2  
2  
2  
2  
4  
7  
1  
1  
1  
1  
1  
2  
1  
1  
6  
6  
1  
1  
1  
3  
3  
1  
3  
3  
1  
1  
2  
4  
1  
2  
1  
5  
28  
1  
1  
1  
1  
1  
1  
1  
1  
1  
2  
4  
1

21  
18  
21  
23  
21  
3  
3  
3  
7  
4  
3  
2  
2  
2  
2  
2  
2  
2  
2  
2  
3  
4  
4  
4  
4  
4  
5  
4  
11  
7  
2  
4  
18  
6  
3  
4  
9  
4  
3  
10  
11  
2  
2  
2  
2  
2  
14  
3  
9  
9  
9

2  
2  
2  
2  
2  
2  
2  
4  
9  
7  
12  
11  
11  
7  
11  
11  
3  
3  
7  
7  
13  
4  
10  
13  
2  
3  
3  
3  
3  
3  
3  
3  
3  
3  
4  
16  
10  
9  
15  
3  
3  
3  
2  
2  
2  
2  
2  
2  
2  
2  
6  
5  
16

6  
9  
10  
5  
14  
4  
16  
8  
5  
3  
3  
3  
4  
2  
2  
12  
11  
5  
10  
4  
4  
3  
6  
4  
8  
7  
2  
2  
2  
2  
2  
2  
2  
2  
2  
2  
2  
2  
2  
3  
3  
3  
3  
3  
7  
16  
13  
6  
1  
1  
1





1  
1  
1  
1  
1  
1  
1  
1  
1  
1  
1  
1  
1  
1  
1  
1  
1  
1  
1  
1  
1  
1  
1  
1  
1  
1  
1  
1  
1  
1  
1  
1  
1  
1  
1  
1  
1  
1  
1  
1  
1  
1  
1  
1  
1  
1  
1  
7  
4  
4  
8  
8  
8  
5  
5  
8  
8  
2  
2

2  
2  
2  
2  
2  
2  
3  
6  
5  
4  
15  
6  
3  
8  
2  
2  
2  
2  
2  
2  
2  
2  
2  
2  
2  
2  
2  
2  
2  
3  
3  
3  
3  
9  
6  
7  
7  
8  
8  
15  
3  
3  
9  
6  
2  
2  
2  
2  
2  
2  
2  
2

4  
6  
16  
3  
3  
7  
7  
5  
9  
4  
7  
7  
8  
3  
4  
8  
8  
2  
2  
2  
2  
2  
2  
2  
2  
2  
2  
2  
12  
7  
5  
3  
3  
3  
5  
5  
7  
4  
4  
4  
4  
4  
12  
2  
2  
2  
2  
2  
2  
2





10  
5  
4  
4  
2  
2  
2  
2  
2  
2  
13  
8  
8  
7  
4  
4  
5  
5  
5  
2  
2  
2  
2  
2  
2  
2  
2  
2  
6  
8  
8  
4  
3  
3  
5  
5  
5  
14  
9  
9  
10  
4  
4  
4  
12  
3  
3  
6  
6  
6  
6  
2







1  
1  
1  
1  
1  
1  
1  
1  
1  
1  
1  
1  
2  
2  
2  
2  
2  
2  
2  
2  
2  
2  
4  
4  
8  
11  
3  
3  
3  
3  
3  
3  
3  
5  
14  
13  
5  
5  
4  
7  
3  
3  
3  
3  
3  
3  
15  
12  
10  
5  
5  
2  
2

2  
2  
2  
2  
2  
6  
6  
5  
5  
8  
4  
6  
12  
8  
8  
5  
5  
6  
4  
3  
3  
3  
3  
3  
3  
3  
2  
2  
2  
2  
2  
2  
2  
2  
2  
2  
2  
2  
2  
2  
2  
2  
2  
2  
2  
2  
2  
8  
6  
6  
10  
4  
4  
5  
3  
3  
3  
3  
7







3  
5  
6  
4  
4  
4  
6  
6  
8  
7  
7  
3  
3  
3  
6  
5  
7  
2  
2  
2  
2  
2  
2  
2  
2  
2  
2  
2  
2  
2  
2  
2  
2  
2  
2  
2  
2  
2  
8  
4  
4  
13  
7  
10  
3  
3  
3  
1  
1  
1  
1  
1  
1  
1  
1  
1  
1





1  
1  
1  
1  
1  
1  
1  
1  
1  
1  
6  
6  
9  
7  
13  
8  
10  
6  
3  
3  
2  
2  
2  
2  
2  
2  
2  
5  
5  
4  
11  
5  
5  
9  
4  
4  
4  
4  
4  
3  
3  
14  
12  
11  
2  
2  
2  
2  
2  
2





2  
2  
2  
2  
2  
2  
6  
6  
10  
9  
7  
8  
12  
9  
4  
4  
4  
4  
7  
7  
8  
5  
9  
3  
3  
2  
2  
2  
2  
2  
2  
2  
2  
2  
2  
2  
8  
4  
12  
9  
7  
3  
6  
10  
11  
4  
4  
5  
1  
1











1  
1  
1  
7  
6  
4  
3  
3  
3  
2  
2  
2  
2  
2  
2  
2  
2  
2  
6  
9  
5  
5  
7  
4  
4  
4  
8  
3  
3  
2  
2  
2  
2  
2  
2  
2  
2  
2  
2  
5  
8  
3  
3  
3  
3  
3  
4  
4  
4  
4  
5  
13  
1



1  
1  
1  
1  
1  
1  
1  
1  
1  
1  
1  
1  
3  
4  
4  
4  
4  
4  
2  
2  
2  
2  
2  
2  
2  
2  
2  
2  
2  
2  
2  
2  
2  
6  
6  
6  
7  
5  
12  
4  
4  
4  
3  
6  
6  
6  
5  
2  
2  
2  
2  
2  
2  
4



1  
1  
1  
1  
1  
1  
1  
1  
1  
1  
1  
1  
1  
1  
1  
1  
1  
1  
1  
1  
1  
1  
12  
8  
4  
4  
3  
3  
5  
5  
2  
2  
2  
2  
2  
2  
2  
2  
2  
2  
2  
2  
2  
2  
2  
2  
2  
2  
9  
6  
6  
6  
7  
13  
3  
2  
2  
2



1  
1  
1  
6  
3  
3  
3  
12  
4  
2  
2  
2  
2  
2  
2  
2  
2  
2  
2  
2  
2  
11  
4  
4  
4  
3  
7  
6  
2  
2  
2  
2  
7  
4  
4  
3  
6  
6  
10  
4  
1  
1  
1  
1  
1  
1  
1  
1  
1  
1







1  
1  
1  
1  
1  
1  
1  
1  
1  
1  
1  
1  
1  
1  
1  
1  
1  
1  
1  
1  
1  
1  
1  
1  
1  
1  
1  
1  
1  
1  
1  
1  
1  
1  
1  
1  
1  
10  
4  
4  
2  
2  
2  
2  
2  
2  
2  
2  
2  
2  
2  
2  
3  
3  
3  
3  
3  
5  
7  
6  
6  
10



1  
1  
1  
1  
1  
1  
1  
1  
1  
1  
1  
1  
1  
1  
1  
1  
1  
1  
1  
1  
1  
1  
1  
1  
1  
1  
1  
1  
1  
1  
1  
1  
1  
1  
1  
1  
1  
2  
2  
2  
2  
2  
2  
8  
6  
5  
3  
3  
4  
4  
4  
4  
4  
4  
11  
9  
9  
7  
5  
5  
5



1  
1  
1  
1  
1  
1  
1  
1  
1  
1  
1  
1  
1  
1  
1  
1  
1  
1  
1  
1  
1  
1  
1  
1  
1  
1  
1  
1  
1  
1  
1  
1  
2  
2  
2  
2  
2  
2  
2  
4  
4  
4  
5  
5  
11  
6  
6  
3  
7  
7  
6  
11  
2  
2  
2  
2



1  
1  
1  
1  
1  
1  
1  
1  
1  
1  
1  
1  
1  
1  
1  
1  
1  
1  
9  
2  
2  
2  
11  
6  
5  
8  
4  
4  
4  
4  
4  
3  
3  
3  
3  
3  
3  
3  
3  
5  
5  
10  
2  
5  
3  
3  
3  
3  
8  
9  
4  
4  
9  
1  
1













1  
1  
1  
1  
1  
1  
1  
1  
1  
1  
3  
2  
2  
2  
5  
5  
5  
5  
5  
6  
4  
8  
5  
5  
7  
4  
11  
2  
2  
2  
2  
2  
2  
2  
2  
2  
2  
2  
2  
2  
2  
2  
2  
2  
2  
6  
5  
1  
1  
1  
1  
1  
1  
1  
1

1  
1  
1  
1  
1  
1  
1  
1  
1  
1  
1  
1  
1  
1  
1  
1  
1  
1  
1  
1  
1  
1  
1  
1  
1  
1  
1  
1  
3  
3  
3  
3  
3  
6  
5  
5  
7  
2  
2  
2  
2  
2  
2  
2  
2  
2  
2  
6  
3  
3  
3  
3  
3  
5  
9  
6  
5





5  
2  
2  
2  
2  
2  
2  
4  
5  
3  
3  
3  
3  
4  
4  
10  
1  
1  
1  
1  
1  
1  
1  
1  
1  
1  
1  
1  
1  
1  
1  
1  
1  
1  
1  
1  
1  
1  
1  
1  
1  
1  
1  
1  
2  
2  
2  
2  
2  
6  
10  
3  
3  
4

7  
4  
4  
2  
2  
2  
2  
2  
2  
2  
2  
5  
11  
4  
1  
1  
1  
1  
1  
1  
1  
1  
1  
1  
1  
1  
1  
1  
1  
1  
1  
1  
1  
1  
1  
1  
1  
1  
1  
1  
3  
3  
2  
2  
2  
5  
4  
4  
4  
4  
11  
6  
6









1  
1  
1  
1  
1  
1  
1  
1  
1  
1  
1  
1  
1  
4  
3  
3  
3  
7  
2  
6  
4  
4  
3  
3  
5  
6  
6  
6  
9  
4  
2  
2  
5  
6  
6  
3  
3  
3  
3  
1  
1  
1  
1  
1  
1  
1  
1  
1  
1  
1

1  
1  
1  
1  
1  
1  
1  
1  
1  
1  
1  
1  
1  
1  
1  
1  
1  
1  
1  
1  
4  
6  
5  
3  
3  
3  
2  
2  
2  
2  
2  
2  
2  
2  
4  
5  
5  
6  
3  
3  
3  
3  
3  
4  
4  
1  
1  
1  
1  
1  
1  
1  
1  
1  
1



1  
1  
1  
1  
1  
1  
1  
1  
1  
1  
1  
1  
1  
1  
1  
1  
2  
2  
2  
2  
2  
2  
2  
2  
8  
6  
10  
3  
3  
3  
6  
2  
2  
2  
2  
2  
2  
2  
2  
2  
2  
2  
2  
4  
3  
3  
3  
1  
1  
1  
1  
1  
1  
1  
1  
1  
1











2  
2  
2  
4  
3  
2  
2  
2  
2  
2  
2  
2  
2  
4  
1  
1  
1  
1  
1  
1  
1  
1  
1  
1  
1  
1  
1  
1  
1  
1  
1  
1  
1  
1  
1  
1  
3  
8  
2  
2  
2  
2  
2  
3  
3  
3  
3  
3  
4  
4  
1  
1





2  
2  
2  
2  
5  
4  
7  
5  
5  
5  
1  
1  
1  
1  
1  
1  
1  
1  
1  
1  
1  
1  
1  
2  
2  
2  
2  
4  
3  
3  
3  
4  
2  
2  
2  
2  
2  
2  
2  
2  
2  
3  
3  
1  
1  
1  
1  
1  
1  
1  
1  
1  
1  
1





1  
1  
1  
1  
1  
1  
1  
1  
1  
1  
5  
5  
6  
3  
2  
2  
2  
1  
1  
1  
1  
1  
1  
1  
1  
1  
1  
1  
1  
1  
1  
1  
1  
1  
1  
1  
1  
1  
1  
1  
3  
4  
4  
4  
5  
2  
2  
4  
6  
6  
8  
2  
2  
2  
2  
1  
1

1  
1  
1  
1  
1  
1  
1  
7  
7  
4  
4  
5  
5  
8  
3  
3  
3  
2  
2  
2  
2  
2  
1  
1  
1  
1  
1  
6  
3  
7  
2  
2  
2  
2  
4  
5  
6  
6  
1  
1  
1  
1  
1  
1  
1  
1  
1  
1  
1

1  
1  
2  
2  
2  
2  
5  
3  
4  
2  
2  
9  
3  
1  
1  
1  
1  
1  
1  
1  
1  
1  
1  
1  
1  
1  
1  
1  
1  
1  
1  
1  
1  
1  
1  
1  
1  
1  
1  
1  
1  
1  
1  
1  
1  
1  
1  
1  
1  
1  
1  
1  
1  
1  
1  
7  
4  
2  
2  
2  
2  
2  
2  
2  
2  
2  
5  
4

3  
5  
1  
1  
1  
1  
1  
1  
1  
1  
2  
2  
9  
3  
8  
2  
1  
1  
1  
1  
1  
1  
1  
1  
1  
1  
1  
1  
1  
1  
1  
1  
1  
1  
1  
1  
1  
1  
6  
2  
2  
3  
4  
9  
1  
1  
1  
1  
1  
1  
1  
1  
1  
1  
1

1  
1  
1  
1  
1  
1  
1  
1  
1  
8  
2  
2  
2  
2  
2  
2  
1  
1  
1  
1  
1  
1  
1  
1  
1  
1  
1  
1  
1  
1  
1  
1  
1  
1  
1  
1  
1  
1  
1  
1  
5  
6  
3  
3  
3  
2  
2  
2  
2  
4  
3  
1  
1  
1  
1  
1



1  
2  
2  
2  
3  
2  
2  
2  
2  
1  
1  
1  
1  
1  
1  
1  
1  
7  
4  
7  
2  
2  
2  
2  
2  
2  
1  
1  
1  
1  
1  
1  
1  
1  
1  
7  
8  
2  
2  
1  
1  
1  
1  
1  
1  
4  
3  
3  
6  
2  
8  
1  
1  
1



7  
1  
1  
1  
1  
1  
1  
1  
1  
1  
4  
3  
6  
2  
1  
1  
1  
1  
1  
1  
1  
1  
1  
1  
1  
1  
1  
1  
1  
1  
2  
1  
1  
1  
1  
1  
1  
1  
3  
3  
2  
3  
3  
3  
3  
3  
4  
1  
1  
1  
1  
1  
1  
2  
2  
2



1  
1  
1  
2  
4  
8  
7  
1  
1  
1  
1  
1  
1  
4  
5  
2  
2  
2  
7  
1  
1  
3  
3  
2  
2  
4  
1  
1  
1  
1  
1  
1  
1  
1  
1  
8  
7  
3  
4  
2  
2  
2  
1  
1  
1  
1  
3  
2  
6  
1

1  
1  
1  
1  
1  
1  
1  
4  
2  
2  
6  
7  
1  
1  
1  
2  
4  
7  
2  
2  
1  
1  
1  
1  
1  
1  
1  
1  
1  
1  
1  
1  
2  
7  
7  
1  
1  
1  
1  
1  
2  
3  
3  
1  
1  
1  
1  
1  
1  
1

1  
1  
1  
1  
1  
2  
2  
6  
5  
4  
1  
1  
1  
1  
1  
3  
5  
2  
2  
3  
5  
1  
1  
1  
1  
1  
1  
1  
1  
1  
1  
1  
2  
3  
1  
1  
1  
1  
1  
1  
3  
7  
3  
3  
1  
1  
1  
1  
1  
1  
1  
1





1  
2  
1  
1  
1  
2  
2  
2  
4  
1  
2  
3  
3  
2  
1  
1  
1  
1  
1  
1  
1  
1  
2  
2  
2  
1  
1  
1  
1  
3  
3  
2  
2  
4  
1  
1  
1  
4  
2  
2  
2  
1  
1  
1  
1  
1  
1  
1  
1  
1  
1  
1

1  
1  
2  
2  
1  
1  
1  
1  
1  
1  
1  
1  
1  
1  
1  
1  
4  
4  
2  
4  
1  
1  
1  
1  
1  
3  
3  
1  
1  
1  
1  
1  
1  
1  
1  
3  
2  
2  
2  
1  
1  
1  
1  
1  
1  
2  
5  
1  
1  
3  
3  
1  
1  
3

6  
5  
5  
3  
1  
2  
2  
5  
3  
1  
2  
2  
2  
2  
2  
2  
3  
1  
1  
1  
1  
1  
1  
1  
3  
2  
1  
4  
1  
1  
1  
1  
1  
1  
2  
2  
1  
1  
4  
4  
1  
1  
1  
1  
1  
1  
2  
2  
1  
1  
3

1  
2  
1  
2  
3  
1  
1  
3  
2  
1  
3  
1  
1  
2  
1  
1  
1  
1  
1  
1  
1  
1  
2  
1  
1  
1  
1  
1  
1  
1  
2  
2  
1  
4  
1  
1  
1  
1  
1  
1  
4  
1  
1  
2  
3  
1  
1  
2  
2  
1  
1  
1  
1

1  
4  
1  
3  
3  
1  
3  
1  
4  
1  
4  
1  
4  
2  
4  
1  
1  
1  
1  
1  
1  
1  
1  
5  
20  
5  
3  
15  
19  
3  
4  
2  
2  
2  
2  
2  
5  
10  
3  
4  
6  
6  
3  
5  
2  
2  
2  
12  
3  
3

3  
7  
8  
3  
3  
5  
4  
15  
3  
2  
4  
4  
11  
4  
3  
5  
4  
4  
7  
5  
2  
2  
2  
2  
2  
21  
12  
6  
3  
3  
11  
7  
19  
15  
6  
5  
5  
7  
2  
2  
2  
2  
3  
3  
11  
6  
7  
3

3  
4  
10  
3  
5  
13  
2  
2  
2  
6  
16  
5  
3  
11  
3  
9  
2  
2  
2  
2  
2  
6  
7  
7  
3  
4  
3  
2  
2  
2  
2  
2  
2  
2  
2  
2  
2  
2  
2  
2  
19  
14  
6  
19  
5  
5  
3  
4  
4  
4  
4  
4  
3





1  
1  
1  
1  
1  
1  
1  
1  
1  
1  
1  
1  
1  
1  
1  
1  
1  
1  
1  
1  
1  
1  
1  
1  
1  
1  
1  
1  
1  
1  
1  
1  
1  
1  
1  
1  
1  
1  
1  
1  
1  
1  
1  
1  
1  
1  
1  
1  
1  
1  
16  
6  
4  
4  
4  
5  
5  
7

9  
2  
2  
2  
2  
2  
2  
2  
4  
4  
3  
3  
6  
11  
5  
4  
4  
4  
4  
4  
4  
10  
3  
3  
3  
6  
8  
9  
4  
4  
6  
6  
6  
7  
7  
5  
18  
2  
2  
2  
2  
2  
3  
3  
4  
4  
4  
7  
4

4  
7  
5  
5  
6  
3  
3  
3  
7  
7  
4  
2  
2  
2  
2  
2  
2  
2  
2  
2  
2  
2  
2  
2  
2  
2  
2  
2  
2  
7  
7  
6  
9  
5  
3  
3  
3  
3  
3  
3  
7  
11  
14  
4  
4  
17  
6  
6  
5  
14  
6  
7  
11  
12





1  
1  
1  
1  
1  
1  
5  
5  
10  
11  
10  
8  
3  
3  
5  
13  
2  
2  
2  
2  
2  
2  
2  
2  
2  
2  
2  
2  
2  
2  
2  
2  
2  
2  
2  
2  
2  
2  
2  
2  
2  
2  
2  
2  
3  
3  
8  
4  
4  
6  
7  
3  
3  
3  
3  
3  
3  
4

6  
6  
2  
2  
2  
2  
2  
2  
2  
2  
4  
4  
6  
6  
3  
3  
7  
11  
8  
12  
4  
4  
8  
5  
10  
6  
3  
8  
2  
2  
2  
2  
2  
2  
2  
2  
2  
2  
5  
4  
4  
10  
7  
5  
4  
3  
3  
3  
8  
9





1  
1  
1  
1  
1  
1  
1  
1  
1  
1  
1  
1  
1  
1  
1  
1  
1  
1  
1  
1  
1  
1  
1  
1  
1  
1  
1  
1  
1  
1  
1  
1  
1  
1  
1  
1  
1  
1  
1  
1  
6  
5  
5  
5  
5  
5  
5  
5  
5  
10  
10  
2  
2  
2  
2  
2  
2  
2  
2









3  
3  
3  
3  
3  
3  
13  
4  
4  
7  
8  
6  
5  
2  
2  
2  
2  
2  
2  
2  
2  
2  
2  
2  
2  
2  
2  
2  
2  
2  
2  
2  
2  
2  
2  
2  
2  
2  
2  
2  
2  
2  
2  
2  
8  
8  
3  
3  
6  
5  
8  
8  
8  
4  
4  
1  
1  
1  
1  
1  
1  
1



1  
1  
1  
1  
1  
1  
1  
1  
1  
1  
1  
3  
3  
3  
3  
3  
3  
3  
2  
2  
2  
2  
2  
2  
2  
2  
2  
15  
4  
4  
4  
8  
3  
3  
3  
3  
5  
5  
11  
6  
6  
2  
2  
2  
2  
2  
2  
2  
2  
2  
2



2  
2  
2  
5  
6  
3  
4  
4  
11  
7  
6  
4  
4  
4  
4  
4  
3  
3  
9  
2  
2  
2  
2  
2  
2  
2  
2  
2  
2  
8  
5  
5  
4  
4  
4  
4  
4  
4  
4  
4  
7  
3  
3  
3  
3  
6  
1  
1  
1  
1  
1  
1  
1



1  
1  
1  
1  
1  
1  
1  
1  
1  
1  
1  
1  
1  
1  
1  
1  
1  
1  
1  
1  
1  
1  
5  
6  
2  
2  
2  
2  
2  
2  
2  
2  
2  
2  
2  
8  
3  
3  
3  
3  
3  
3  
14  
6  
6  
4  
7  
12  
11  
8  
6





1  
1  
1  
1  
1  
1  
1  
1  
1  
1  
1  
1  
1  
1  
1  
1  
7  
3  
14  
7  
8  
6  
13  
3  
3  
3  
3  
7  
2  
2  
2  
2  
2  
2  
2  
2  
2  
2  
2  
2  
2  
4  
4  
4  
6  
7  
5  
5  
5  
4  
4  
4  
3



1  
1  
1  
1  
1  
1  
1  
1  
1  
1  
1  
1  
1  
1  
1  
1  
1  
1  
1  
1  
1  
1  
1  
1  
1  
1  
1  
1  
1  
1  
1  
1  
1  
1  
1  
1  
1  
1  
1  
1  
1  
1  
1  
1  
1  
1  
1  
1  
1  
1  
1  
1  
6  
4  
4  
4  
7  
3  
3  
3  
3  
2



2  
2  
2  
5  
5  
4  
4  
4  
4  
7  
5  
3  
3  
3  
3  
3  
3  
3  
4  
4  
2  
2  
2  
2  
2  
2  
2  
2  
2  
2  
2  
4  
4  
4  
4  
3  
3  
3  
3  
5  
6  
1  
1  
1  
1  
1  
1  
1  
1  
1  
1  
1  
1  
1



1  
1  
1  
2  
2  
2  
2  
2  
2  
2  
2  
2  
2  
2  
5  
11  
6  
6  
12  
4  
4  
13  
3  
3  
3  
5  
4  
4  
4  
4  
4  
4  
2  
2  
2  
2  
2  
2  
2  
2  
2  
10  
3  
5  
5  
5  
4  
9  
6  
6  
5  
2



1  
1  
1  
1  
1  
1  
1  
1  
1  
1  
1  
1  
1  
1  
1  
1  
1  
1  
1  
1  
4  
4  
3  
13  
5  
9  
13  
3  
5  
2  
2  
2  
2  
2  
2  
2  
2  
2  
11  
4  
4  
13  
5  
5  
5  
14  
3  
3  
3  
3  
13  
11

13

6

6

2

2

2

2

2

9

7

1

1

1

1

1

1

1

1

1

1

1

1

1

1

1

1

1

1

1

1

1

1

1

1

1

1

1

1

1

1

1

1

1

1

1

1

1

1

1

1

1  
1  
1  
1  
1  
1  
3  
3  
3  
5  
5  
5  
6  
4  
4  
9  
10  
7  
3  
2  
2  
2  
2  
2  
2  
2  
2  
2  
2  
2  
2  
2  
10  
5  
5  
7  
7  
6  
6  
3  
3  
5  
8  
2  
2  
2  
2  
2  
2  
2  
2





1  
1  
1  
1  
1  
1  
1  
1  
1  
1  
1  
1  
1  
1  
1  
1  
1  
1  
1  
1  
1  
1  
1  
9  
3  
3  
3  
10  
4  
4  
5  
13  
2  
2  
2  
2  
6  
6  
11  
3  
3  
3  
3  
3  
3  
4



1  
1  
1  
1  
1  
1  
1  
1  
1  
1  
1  
1  
1  
1  
1  
1  
1  
1  
1  
1  
1  
1  
1  
1  
1  
1  
1  
1  
1  
1  
1  
1  
1  
1  
1  
1  
1  
1  
4  
4  
8  
3  
3  
3  
3  
3  
3  
3  
3  
3  
10  
11  
8  
2  
2  
2  
2  
2  
2  
2  
10  
11



1  
1  
1  
1  
1  
1  
1  
1  
1  
1  
1  
1  
1  
1  
1  
1  
1  
1  
1  
1  
1  
1  
1  
1  
1  
1  
1  
1  
1  
1  
1  
1  
1  
1  
1  
1  
1  
1  
1  
1  
1  
1  
1  
6  
6  
6  
12  
3  
3  
3  
3

3  
4  
4  
4  
8  
8  
5  
5  
2  
2  
2  
2  
2  
2  
2  
2  
2  
2  
12  
5  
4  
4  
4  
4  
4  
5  
5  
10  
2  
2  
2  
2  
2  
2  
2  
2  
2  
11  
3  
3  
3  
1  
1  
1  
1  
1  
1  
1  
1  
1  
1  
1











1  
1  
1  
1  
1  
1  
1  
1  
1  
1  
1  
1  
1  
5  
6  
7  
3  
3  
5  
13  
2  
2  
2  
2  
2  
2  
2  
2  
2  
2  
10  
8  
3  
3  
3  
3  
4  
8  
6  
6  
5  
5  
7  
1  
1  
1  
1  
1  
1  
1





1  
1  
1  
1  
1  
1  
1  
1  
1  
1  
1  
1  
1  
1  
1  
1  
1  
1  
1  
1  
1  
12  
9  
5  
2  
2  
2  
2  
2  
2  
2  
4  
6  
7  
9  
3  
3  
3  
3  
3  
3  
10  
5  
2  
2  
2  
2  
2  
9  
6  
3  
3  
3  
3

12  
5  
1  
1  
1  
1  
1  
1  
1  
1  
1  
1  
1  
1  
1  
1  
1  
1  
1  
1  
1  
1  
1  
1  
1  
1  
1  
1  
1  
1  
1  
1  
1  
1  
1  
1  
1  
1  
6  
6  
4  
4  
3  
3  
3  
3  
3  
3  
3  
7  
2  
2  
2  
2  
2  
2  
2  
2  
6  
6







2  
9  
6  
6  
1  
1  
1  
1  
1  
1  
1  
1  
1  
1  
1  
1  
1  
1  
1  
1  
1  
1  
1  
1  
1  
1  
1  
1  
1  
1  
1  
1  
1  
1  
1  
1  
1  
1  
1  
1  
1  
1  
1  
1  
1  
1  
1  
1  
1  
1  
1  
1  
1  
1  
1  
1  
1  
1  
1  
1  
7  
5  
4  
4  
4  
4  
3  
3  
3  
9  
8







1  
1  
1  
1  
1  
1  
1  
1  
1  
1  
1  
1  
1  
1  
1  
1  
1  
1  
4  
3  
3  
3  
3  
3  
9  
5  
2  
2  
2  
2  
2  
2  
2  
2  
2  
2  
2  
2  
2  
3  
3  
3  
5  
5  
7  
8  
1  
1  
1  
1  
1  
1  
1  
1  
1  
1  
1  
1

1  
1  
1  
1  
1  
1  
1  
1  
1  
1  
1  
1  
1  
1  
3  
3  
3  
3  
2  
2  
2  
2  
2  
2  
2  
2  
8  
7  
11  
3  
12  
4  
2  
2  
2  
2  
2  
2  
2  
10  
7  
7  
6  
6  
3  
3  
3  
3  
5  
8  
1  
1  
1

1  
1  
1  
1  
1  
1  
1  
1  
1  
1  
1  
1  
1  
1  
1  
1  
1  
1  
1  
1  
1  
1  
4  
6  
6  
10  
2  
2  
2  
2  
2  
2  
2  
2  
5  
3  
3  
3  
3  
3  
3  
3  
6  
5  
5  
4  
6  
2  
2  
2  
2  
2  
2  
2





10

1

1

1

1

1

1

1

1

1

1

1

1

1

1

1

1

1

1

1

1

4

4

4

4

2

2

2

2

2

2

2

2

2

6

6

6

9

3

3

3

3

3

3

5

8

2

2

2

2

9  
7  
6  
3  
4  
1  
1  
1  
1  
1  
1  
1  
1  
1  
1  
1  
1  
1  
1  
1  
1  
1  
1  
1  
6  
6  
4  
3  
3  
3  
2  
2  
2  
2  
10  
3  
3  
3  
9  
9  
1  
1  
1  
1  
1  
1  
1  
1

















1  
1  
1  
1  
1  
1  
1  
1  
3  
3  
10  
6  
4  
4  
4  
4  
2  
2  
2  
2  
6  
1  
1  
1  
1  
1  
1  
1  
1  
1  
1  
1  
1  
1  
1  
1  
9  
4  
2  
2  
3  
3  
3  
3  
3  
4  
3  
2  
2  
1  
1  
1

1  
1  
1  
1  
1  
6  
10  
3  
2  
4  
4  
4  
4  
8  
3  
4  
4  
1  
1  
1  
1  
1  
1  
1  
1  
1  
1  
1  
1  
1  
1  
1  
1  
1  
1  
1  
1  
1  
1  
1  
1  
1  
2  
2  
2  
2  
2  
2  
2  
2  
2  
2  
6  
5  
3  
3  
3  
3  
4  
4

6  
5  
8  
2  
2  
1  
1  
1  
1  
1  
1  
1  
1  
1  
1  
1  
1  
1  
1  
1  
1  
1  
1  
1  
5  
6  
4  
4  
3  
2  
2  
2  
4  
4  
1  
1  
1  
1  
1  
1  
1  
3  
3  
2  
2  
4  
4  
9  
8

7  
2  
2  
1  
1  
1  
1  
1  
1  
1  
1  
1  
1  
1  
1  
1  
1  
1  
1  
1  
1  
1  
1  
1  
3  
3  
3  
3  
5  
4  
4  
6  
2  
2  
7  
3  
3  
4  
4  
8  
1  
1  
1  
1  
1  
1  
1  
1  
1  
1  
1  
1

1  
1  
1  
1  
1  
1  
9  
2  
2  
2  
2  
3  
3  
10  
5  
7  
3  
3  
3  
2  
2  
2  
1  
1  
1  
1  
1  
1  
1  
1  
1  
1  
1  
5  
9  
3  
3  
9  
2  
4  
4  
9  
1  
1  
1  
1  
1  
1  
1  
1

1  
1  
6  
6  
4  
2  
2  
7  
4  
5  
9  
1  
1  
1  
1  
1  
1  
1  
1  
1  
1  
1  
1  
1  
1  
1  
1  
1  
2  
2  
8  
3  
3  
3  
3  
3  
5  
4  
10  
9  
3  
3  
2  
2  
2  
5  
1  
1  
1  
1  
1  
1



1  
1  
1  
1  
1  
8  
5  
4  
4  
9  
5  
3  
7  
1  
1  
1  
1  
1  
1  
1  
1  
1  
1  
1  
1  
1  
5  
5  
2  
2  
4  
3  
3  
2  
1  
1  
1  
1  
1  
1  
1  
1  
1  
1  
1  
9  
8  
6  
5  
2  
2  
2  
2  
2  
3

3  
3  
3  
4  
5  
1  
1  
1  
1  
1  
1  
1  
1  
1  
1  
1  
1  
1  
1  
1  
2  
2  
2  
2  
2  
2  
5  
5  
5  
6  
4  
2  
2  
2  
2  
1  
1  
1  
1  
1  
1  
1  
1  
1  
1  
1  
1  
5  
5  
5  
5  
3  
3  
3  
2

2  
2  
1  
1  
1  
1  
1  
1  
1  
1  
1  
1  
8  
6  
4  
7  
5  
5  
5  
1  
1  
1  
1  
1  
1  
4  
4  
4  
2  
2  
2  
2  
2  
3  
5  
6  
9  
5  
3  
3  
2  
1  
1  
4  
4  
8  
2  
4  
4  
5  
1



1  
9  
3  
3  
3  
2  
2  
2  
2  
2  
2  
7  
1  
1  
1  
1  
1  
1  
1  
1  
1  
1  
2  
3  
4  
1  
1  
1  
1  
1  
1  
1  
1  
1  
1  
1  
1  
1  
1  
5  
4  
2  
3  
3  
1  
1  
1  
1  
1  
1  
1  
2  
4  
3  
1  
1

1  
1  
1  
1  
4  
5  
2  
2  
8  
4  
9  
2  
2  
2  
6  
8  
1  
1  
1  
1  
3  
6  
9  
4  
4  
1  
1  
1  
1  
1  
1  
1  
1  
1  
1  
5  
5  
4  
1  
1  
1  
1  
1  
1  
1  
5  
2  
2  
2  
3  
3

4  
4  
4  
5  
2  
2  
2  
3  
1  
1  
1  
1  
1  
1  
6  
3  
2  
2  
2  
2  
1  
1  
1  
4  
4  
3  
3  
3  
3  
1  
1  
1  
1  
6  
2  
2  
4  
3  
3  
3  
3  
3  
2  
2  
2  
1  
3  
3  
3  
3

4  
2  
2  
2  
3  
5  
1  
1  
1  
3  
2  
1  
1  
1  
1  
1  
1  
1  
4  
2  
2  
4  
3  
2  
2  
2  
7  
1  
1  
1  
1  
1  
1  
1  
4  
2  
3  
1  
1  
1  
4  
2  
2  
2  
6  
1  
1  
1  
1  
1



2  
2  
2  
3  
2  
1  
1  
1  
1  
1  
1  
3  
4  
2  
2  
2  
1  
1  
1  
2  
2  
1  
1  
1  
1  
5  
4  
8  
2  
1  
2  
3  
3  
1  
1  
4  
5  
1  
1  
2  
5  
1  
1  
1  
1  
1  
1  
1  
3  
3

3  
2  
4  
3  
1  
1  
1  
1  
2  
2  
2  
3  
1  
2  
4  
3  
2  
1  
1  
1  
1  
1  
1  
1  
1  
1  
1  
1  
7  
2  
2  
2  
1  
1  
1  
1  
1  
1  
1  
6  
2  
4  
4  
6  
1  
1  
1  
1  
1  
1  
7  
4

2  
2  
1  
2  
2  
1  
1  
1  
1  
5  
1  
1  
1  
1  
1  
1  
1  
1  
1  
5  
1  
1  
1  
3  
1  
1  
1  
1  
1  
1  
1  
4  
1  
6  
2  
2  
2  
1  
1  
5  
1  
1  
1  
1  
2  
5  
1  
1  
1  
1  
2  
2  
1

1  
1  
1  
1  
1  
1  
1  
1  
1  
1  
1  
1  
7  
2  
1  
1  
1  
1  
3  
3  
2  
1  
1  
1  
1  
1  
2  
2  
2  
1  
1  
1  
1  
1  
4  
4  
1  
1  
2  
2  
1  
1  
1  
3  
1  
3  
4  
4  
4  
1  
1

1  
1  
2  
1  
1  
1  
1  
1  
1  
1  
1  
1  
2  
3  
1  
7  
1  
1  
2  
1  
6  
2  
1  
1  
1  
1  
1  
1  
1  
5  
1  
1  
1  
1  
2  
1  
1  
3  
1  
3  
2  
3  
1  
1  
2  
3  
1  
1  
1  
1

1  
1  
1  
1  
1  
3  
2  
1  
1  
1  
1  
1  
1  
3  
1  
1  
1  
1  
1  
6  
1  
6  
1  
2  
2  
1  
1  
1  
1  
5  
1  
1  
1  
1  
3  
4  
1  
2  
1  
3  
3  
1  
2  
1  
1  
1  
1  
4  
5  
2

6  
9  
6  
8  
5  
4  
2  
2  
2  
14  
4  
3  
5  
5  
6  
4  
4  
2  
2  
2  
8  
3  
4  
4  
19  
4  
4  
2  
2  
2  
2  
2  
2  
2  
2  
8  
18  
11  
3  
3  
4  
8  
6  
16  
16  
10  
3  
2  
2

2  
2  
2  
2  
4  
10  
11  
9  
5  
5  
12  
4  
9  
7  
3  
3  
2  
2  
2  
2  
2  
2  
2  
2  
7  
9  
15  
3  
3  
3  
4  
4  
11  
6  
21  
7  
4  
4  
3  
3  
3  
3  
3  
3  
6  
2  
2  
2  
2  
2



2  
2  
4  
6  
3  
3  
4  
5  
5  
6  
8  
15  
15  
4  
4  
3  
3  
3  
3  
6  
15  
19  
2  
2  
2  
2  
2  
2  
2  
2  
2  
2  
2  
2  
2  
12  
4  
4  
4  
1  
1  
1  
1  
1  
1  
1  
1  
1  
1  
1





1  
1  
1  
3  
4  
21  
5  
8  
21  
3  
3  
2  
2  
2  
2  
2  
2  
4  
4  
5  
5  
16  
10  
6  
8  
8  
19  
17  
3  
3  
3  
19  
9  
8  
4  
4  
12  
9  
9  
2  
2  
2  
2  
2  
2  
6  
6  
3  
13











2  
2  
2  
2  
2  
2  
2  
2  
2  
2  
2  
2  
7  
7  
3  
3  
3  
6  
12  
5  
5  
10  
6  
20  
8  
5  
7  
3  
3  
3  
3  
3  
3  
3  
11  
4  
8  
10  
10  
2  
2  
2  
2  
2  
2  
2  
2  
2  
2

2  
2  
5  
5  
15  
16  
11  
11  
14  
4  
3  
3  
3  
3  
3  
3  
5  
8  
9  
6  
10  
4  
5  
7  
19  
2  
2  
2  
2  
2  
2  
2  
2  
2  
2  
2  
2  
2  
2  
2  
2  
2  
2  
2  
2  
3  
3  
6  
7  
4  
4  
4  
6

















13  
7  
7  
5  
9  
9  
3  
3  
3  
12  
11  
4  
5  
5  
17  
6  
6  
2  
2  
2  
2  
2  
2  
2  
2  
2  
2  
2  
2  
2  
3  
3  
3  
5  
4  
4  
7  
17  
6  
7  
7  
5  
5  
4  
3  
3  
3  
3  
3  
3  
3  
3  
9





11  
14  
4  
4  
4  
4  
6  
9  
5  
5  
5  
3  
3  
3  
7  
14  
6  
9  
4  
2  
2  
2  
2  
2  
2  
2  
2  
2  
2  
2  
2  
2  
2  
2  
2  
2  
5  
11  
11  
7  
8  
6  
6  
3  
3  
3  
3  
3  
3  
3  
3  
3  
16  
7  
5  
6





1  
1  
1  
1  
1  
1  
1  
1  
1  
1  
1  
1  
7  
4  
12  
3  
3  
3  
3  
3  
11  
6  
5  
5  
2  
2  
2  
2  
2  
2  
2  
2  
2  
2  
2  
2  
14  
4  
4  
4  
6  
5  
3  
3  
3  
3  
3  
3  
3  
12  
12  
8









15  
3  
3  
3  
3  
3  
3  
3  
5  
4  
4  
7  
14  
16  
2  
2  
2  
2  
2  
2  
2  
2  
2  
2  
2  
2  
2  
3  
3  
3  
9  
5  
7  
7  
7  
11  
4  
4  
4  
8  
3  
3  
3  
1  
1  
1  
1  
1  
1  
1  
1  
1





3  
4  
5  
5  
5  
8  
15  
6  
6  
6  
6  
10  
2  
2  
2  
2  
2  
2  
2  
2  
2  
2  
2  
2  
2  
5  
11  
4  
9  
7  
3  
3  
3  
3  
3  
6  
12  
5  
5  
5  
5  
5  
11  
1  
1  
1  
1  
1  
1  
1  
1  
1  
1





1  
1  
1  
1  
1  
1  
1  
1  
1  
1  
1  
1  
1  
1  
1  
1  
1  
1  
1  
1  
1  
1  
1  
1  
2  
2  
2  
2  
2  
2  
2  
2  
2  
2  
17  
5  
5  
12  
4  
4  
4  
7  
10  
12  
12  
18  
8  
5  
11  
3  
16  
4









1  
1  
1  
1  
1  
1  
1  
1  
1  
1  
1  
1  
1  
1  
1  
1  
1  
1  
1  
1  
1  
1  
8  
2  
2  
2  
2  
2  
2  
2  
2  
2  
2  
2  
2  
2  
2  
2  
2  
2  
2  
2  
2  
2  
14  
5  
5  
5  
5  
5  
5  
5  
3  
3  
3  
3











1  
1  
1  
1  
1  
1  
1  
1  
1  
1  
1  
1  
1  
1  
1  
1  
1  
1  
1  
1  
1  
1  
1  
1  
1  
1  
2  
2  
2  
2  
2  
2  
2  
2  
2  
2  
2  
2  
2  
2  
3  
3  
6  
4  
9  
8  
9  
4  
3









1  
1  
1  
1  
1  
1  
1  
1  
1  
1  
1  
6  
7  
7  
8  
15  
3  
3  
3  
3  
4  
4  
11  
2  
2  
2  
2  
2  
2  
2  
2  
2  
2  
2  
10  
7  
7  
8  
8  
12  
6  
4  
4  
4  
3  
3  
3  
3  
11  
5









1  
3  
3  
3  
3  
3  
3  
2  
2  
2  
2  
2  
2  
6  
4  
4  
4  
4  
4  
5  
5  
5  
15  
16  
7  
15  
16  
6  
3  
3  
3  
3  
3  
3  
5  
7  
10  
2  
2  
2  
2  
2  
2  
2  
2  
6  
4  
4  
3





1  
1  
1  
1  
1  
1  
1  
1  
1  
1  
1  
1  
1  
1  
1  
1  
1  
1  
1  
1  
1  
1  
1  
1  
1  
1  
1  
1  
1  
1  
1  
1  
1  
1  
1  
1  
1  
1  
1  
1  
1  
1  
1  
1  
1  
1  
1  
4  
4  
4  
6  
7  
3  
3  
3  
3  
3  
3  
11  
11  
11  
10  
2  
2  
2





1  
1  
1  
1  
1  
1  
1  
1  
1  
1  
1  
1  
1  
1  
1  
1  
1  
1  
1  
2  
2  
2  
2  
2  
2  
2  
2  
2  
2  
2  
14  
7  
7  
6  
6  
5  
3  
3  
4  
4  
8  
14  
11  
5  
5  
4  
2  
2  
2  
2  
2  
2  
2  
2

12  
14  
7  
7  
3  
3  
3  
6  
14  
5  
5  
5  
5  
1  
1  
1  
1  
1  
1  
1  
1  
1  
1  
1  
1  
1  
1  
1  
1  
1  
1  
1  
1  
1  
1  
1  
1  
1  
1  
1  
1  
1  
1  
14  
6  
6  
3  
3  
3  
3  
3  
2  
2  
2



1  
1  
1  
1  
1  
1  
1  
1  
1  
1  
1  
1  
1  
1  
1  
1  
1  
1  
1  
1  
1  
1  
1  
1  
1  
1  
1  
1  
1  
1  
1  
1  
1  
1  
1  
1  
1  
1  
1  
5  
9  
3  
3  
7  
4  
14  
5  
10  
2  
2  
2  
2  
2  
2  
2  
2  
2  
7  
7  
3  
3

3  
3  
12  
5  
5  
15  
1  
1  
1  
1  
1  
1  
1  
1  
1  
1  
1  
1  
1  
1  
1  
1  
1  
1  
1  
1  
1  
1  
1  
1  
1  
1  
1  
1  
1  
1  
1  
1  
1  
1  
1  
1  
1  
1  
1  
12  
15  
5  
2  
2  
2  
2  
2  
2  
2  
2  
2  
2  
2  
3  
3  
3  
3  
3  
3  
6  
9  
14



1  
1  
1  
1  
1  
1  
1  
1  
1  
1  
1  
4  
9  
7  
3  
3  
11  
5  
5  
2  
2  
2  
2  
2  
2  
2  
2  
2  
2  
4  
4  
3  
3  
3  
5  
5  
5  
5  
5  
5  
15  
14  
4  
4  
4  
9  
6  
6  
6  
1  
1

1  
1  
1  
1  
1  
1  
1  
1  
1  
1  
1  
1  
1  
1  
1  
1  
1  
1  
1  
1  
1  
1  
1  
1  
1  
1  
1  
1  
1  
1  
1  
1  
1  
1  
1  
1  
1  
1  
1  
1  
1  
1  
1  
1  
8  
2  
2  
2  
2  
2  
2  
2  
2  
2  
2  
2  
2  
2  
2  
2  
2  
2  
10  
7  
3  
3  
3  
3  
3  
3  
3  
3  
8  
4







1  
1  
1  
1  
1  
1  
1  
1  
1  
1  
1  
1  
1  
1  
2  
2  
2  
2  
5  
4  
4  
11  
3  
3  
3  
6  
8  
9  
4  
4  
2  
2  
2  
2  
3  
3  
3  
6  
8  
9  
5  
5  
5  
1  
1  
1  
1  
1  
1

1  
1  
1  
1  
1  
1  
1  
1  
1  
1  
1  
1  
1  
1  
1  
1  
1  
1  
1  
1  
1  
1  
1  
1  
1  
1  
1  
1  
1  
1  
1  
1  
1  
1  
1  
1  
1  
1  
1  
1  
1  
1  
1  
1  
1  
1  
1  
4  
8  
8  
6  
11  
3  
3  
3  
2  
2  
2  
2

2  
2  
2  
7  
6  
5  
5  
5  
9  
9  
13  
4  
4  
14  
1  
1  
1  
1  
1  
1  
1  
1  
1  
1  
1  
1  
1  
1  
1  
1  
1  
1  
1  
1  
1  
1  
1  
1  
1  
1  
1  
1  
1  
1  
1  
2  
2  
2  
2  
2  
2  
2  
2  
2  
9  
5  
5





1  
1  
1  
1  
1  
1  
1  
1  
1  
7  
13  
2  
2  
2  
2  
2  
2  
2  
2  
3  
8  
6  
6  
4  
4  
4  
14  
3  
3  
3  
3  
3  
3  
3  
3  
3  
9  
6  
11  
2  
2  
2  
2  
4  
4  
4  
4  
1  
1  
1  
1  
1



1  
1  
1  
1  
1  
1  
1  
1  
1  
1  
1  
1  
1  
1  
1  
1  
1  
1  
1  
1  
1  
1  
1  
1  
1  
1  
1  
11  
7  
7  
7  
3  
3  
3  
4  
2  
2  
2  
2  
2  
2  
2  
2  
2  
2  
10  
6  
7  
11  
3  
3  
4  
4  
4  
4  
7

6  
11  
5  
1  
1  
1  
1  
1  
1  
1  
1  
1  
1  
1  
1  
1  
1  
1  
1  
1  
1  
1  
1  
1  
1  
1  
1  
2  
2  
2  
2  
2  
2  
2  
2  
2  
2  
2  
2  
7  
7  
4  
3  
3  
3  
3  
3  
3  
3  
3  
3  
12  
7  
7  
7  
9  
6  
4  
13

2  
2  
2  
2  
2  
3  
5  
5  
1  
1  
1  
1  
1  
1  
1  
1  
1  
1  
1  
1  
1  
1  
1  
1  
1  
1  
1  
1  
1  
1  
1  
1  
1  
1  
1  
1  
1  
1  
1  
1  
1  
1  
1  
1  
1  
1  
1  
1  
1  
1  
1  
6  
4  
4  
2  
2  
4  
4  
5  
6  
9  
10  
1  
1

1  
1  
1  
1  
1  
1  
1  
1  
1  
1  
1  
1  
1  
1  
1  
1  
1  
1  
1  
1  
1  
1  
1  
1  
3  
3  
2  
2  
2  
2  
2  
2  
2  
2  
2  
2  
2  
2  
2  
2  
2  
2  
2  
2  
5  
6  
7  
3  
3  
3  
3  
3  
3  
5  
6  
2  
2  
2  
2  
2  
2  
1  
1  
1



1  
5  
5  
7  
2  
2  
2  
2  
2  
2  
3  
3  
9  
7  
7  
7  
5  
5  
12  
4  
4  
7  
3  
3  
3  
1  
1  
1  
1  
1  
1  
1  
1  
1  
1  
1  
2  
2  
2  
2  
2  
2  
2  
7  
7  
3  
3  
3  
10  
8  
8  
2







6  
3  
3  
3  
3  
3  
2  
2  
2  
4  
1  
1  
1  
1  
1  
1  
1  
1  
1  
1  
1  
1  
1  
1  
1  
1  
1  
1  
1  
1  
1  
1  
1  
1  
1  
1  
1  
3  
3  
3  
3  
6  
5  
7  
2  
2  
13  
9  
6  
5  
8  
1

1  
1  
1  
1  
1  
1  
1  
1  
1  
1  
1  
2  
2  
2  
2  
2  
2  
2  
2  
5  
9  
8  
4  
4  
4  
4  
4  
5  
2  
2  
3  
3  
3  
1  
1  
1  
1  
1  
1  
1  
1  
4  
6  
6  
2  
2  
2  
2  
2  
5  
1  
1  
1



1  
1  
3  
10  
7  
9  
2  
2  
4  
4  
1  
1  
1  
1  
1  
1  
1  
1  
1  
1  
1  
1  
4  
4  
2  
3  
3  
8  
10  
1  
1  
1  
1  
1  
1  
1  
1  
1  
1  
1  
1  
1  
1  
8  
2  
2  
3  
3  
4  
5  
3  
2

2  
2  
6  
4  
4  
4  
4  
1  
1  
1  
1  
1  
1  
1  
1  
1  
1  
1  
1  
1  
1  
1  
1  
1  
7  
3  
2  
2  
2  
2  
2  
2  
9  
1  
1  
1  
1  
1  
1  
1  
1  
1  
1  
1  
1  
3  
3  
3  
5  
6  
2  
2  
2  
7  
5

3  
10  
1  
1  
1  
1  
1  
1  
1  
1  
1  
1  
1  
1  
1  
1  
1  
1  
1  
2  
2  
2  
2  
2  
2  
2  
2  
2  
2  
2  
2  
2  
5  
9  
4  
2  
2  
1  
1  
1  
1  
1  
1  
1  
1  
1  
1  
1  
5  
8  
9  
9  
3  
3  
5  
2  
2

2  
1  
1  
1  
1  
1  
1  
1  
1  
1  
1  
1  
1  
1  
1  
1  
7  
3  
2  
2  
2  
4  
8  
5  
5  
9  
3  
8  
1  
1  
1  
1  
1  
1  
1  
1  
1  
1  
1  
1  
1  
4  
4  
2  
2  
2  
2  
2  
2  
2  
2  
2  
3

4  
6  
8  
2  
2  
1  
1  
1  
6  
4  
4  
4  
2  
2  
12  
9  
4  
3  
1  
1  
1  
1  
9  
4  
4  
4  
2  
3  
8  
7  
7  
7  
4  
4  
4  
1  
1  
1  
1  
1  
1  
1  
6  
2  
2  
4  
7  
2





5  
10  
5  
2  
1  
1  
1  
1  
1  
1  
1  
1  
1  
1  
1  
1  
3  
10  
1  
1  
1  
2  
2  
2  
4  
4  
4  
3  
3  
4  
4  
1  
1  
1  
1  
1  
1  
1  
1  
1  
2  
3  
3  
8  
2  
1  
1  
1  
1  
1  
1

1  
3  
3  
1  
1  
1  
1  
1  
1  
1  
1  
1  
1  
1  
1  
9  
2  
2  
1  
1  
1  
1  
1  
1  
1  
1  
1  
1  
3  
3  
5  
2  
1  
1  
1  
1  
1  
2  
2  
4  
10  
6  
2  
11  
1  
1  
1  
1  
1  
1  
1  
1  
3  
3  
5  
1

1  
1  
1  
4  
2  
3  
7  
4  
4  
1  
1  
1  
1  
1  
3  
8  
6  
8  
8  
7  
5  
3  
1  
1  
1  
1  
1  
1  
1  
1  
1  
3  
10  
7  
2  
1  
1  
1  
1  
11  
3  
2  
4  
1  
7  
2  
4  
4  
4  
3  
7

1  
1  
1  
4  
2  
6  
4  
10  
2  
1  
1  
1  
1  
1  
1  
1  
3  
6  
4  
1  
1  
1  
1  
1  
1  
3  
2  
2  
2  
4  
9  
1  
1  
1  
1  
1  
1  
1  
1  
1  
1  
2  
7  
4  
1  
1  
1  
1  
10  
2  
2

2  
1  
1  
1  
1  
2  
3  
1  
1  
1  
1  
1  
9  
6  
2  
2  
3  
3  
1  
1  
3  
2  
6  
4  
5  
1  
1  
1  
1  
1  
1  
1  
1  
2  
2  
2  
2  
2  
2  
3  
5  
1  
1  
1  
1  
1  
3  
3  
3  
2

1  
1  
1  
1  
2  
2  
2  
2  
2  
3  
1  
1  
1  
1  
2  
2  
2  
1  
1  
1  
1  
2  
2  
2  
1  
1  
1  
1  
1  
1  
2  
8  
4  
2  
7  
1  
1  
1  
4  
3  
2  
4  
1  
1  
8  
2  
1  
1  
1  
2  
2





4  
1  
1  
1  
1  
7  
2  
1  
2  
1  
1  
1  
1  
3  
3  
1  
1  
1  
2  
3  
4  
2  
1  
1  
6  
1  
1  
1  
1  
2  
2  
2  
2  
5  
2  
2  
1  
1  
1  
1  
2  
1  
4  
2  
2  
1  
3  
1  
8  
2

1  
1  
2  
1  
2  
5  
1  
1  
1  
1  
3  
3  
1  
1  
1  
1  
6  
1  
6  
2  
1  
1  
1  
1  
1  
3  
1  
32  
32  
9  
11  
6  
15  
15  
6  
43  
35  
18  
43  
43  
29  
71  
11  
11  
20  
72  
52  
73  
42

4  
15  
42  
41  
69  
5  
11  
68  
6  
6  
6  
15  
3  
3  
3  
2  
2  
2  
2  
2  
2  
2  
2  
17  
62  
71  
60  
32  
4  
4  
44  
35  
7  
7  
50  
53  
3  
3  
3  
14  
16  
20  
56  
5  
52  
4  
11  
7  
7

10  
10  
14  
14  
36  
34  
18  
5  
15  
14  
3  
2  
2  
2  
2  
2  
2  
7  
7  
29  
40  
5  
60  
6  
10  
30  
16  
4  
4  
4  
4  
4  
4  
4  
4  
9  
20  
7  
26  
3  
3  
28  
5  
5  
8  
8  
8  
31  
27

50  
13  
4  
4  
54  
5  
54  
2  
2  
2  
2  
2  
2  
29  
21  
3  
3  
3  
3  
19  
20  
49  
5  
4  
4  
19  
59  
14  
7  
7  
8  
47  
47  
3  
3  
3  
3  
3  
18  
4  
4  
4  
36  
8  
7  
11  
20  
13



1  
1  
1  
1  
1  
1  
3  
5  
27  
22  
27  
4  
4  
4  
14  
40  
29  
11  
9  
19  
2  
2  
2  
2  
2  
2  
2  
2  
2  
2  
2  
2  
2  
2  
2  
2  
60  
3  
3  
3  
3  
32  
16  
51  
11  
22  
36  
26  
14  
6  
6







1  
1  
1  
1  
1  
1  
1  
1  
1  
1  
1  
1  
1  
1  
1  
1  
1  
1  
1  
1  
1  
9  
11  
25  
16  
38  
2  
2  
2  
2  
2  
2  
2  
2  
2  
2  
2  
2  
2  
2  
2  
2  
2  
2  
2  
7  
16  
16  
9  
3  
3  
3  
3  
37  
21  
27

7  
8  
8  
8  
4  
35  
5  
5  
5  
25  
8  
3  
3  
3  
2  
2  
2  
2  
2  
2  
2  
2  
2  
2  
13  
4  
4  
4  
4  
4  
50  
19  
5  
14  
6  
6  
6  
6  
26  
26  
19  
9  
3  
3  
3  
3  
3  
52  
7  
7  
10  
4







6  
16  
3  
3  
14  
5  
2  
2  
2  
2  
2  
2  
2  
11  
21  
22  
25  
14  
4  
4  
7  
5  
3  
10  
10  
19  
21  
7  
4  
16  
2  
2  
2  
2  
2  
2  
2  
6  
6  
6  
3  
3  
3  
3  
3  
3  
1  
1  
1  
1











1  
7  
15  
8  
32  
6  
7  
52  
3  
2  
2  
2  
2  
4  
5  
14  
1  
1  
1  
1  
1  
1  
1  
1  
1  
1  
1  
1  
1  
1  
1  
1  
1  
4  
3  
7  
7  
7  
2  
2  
2  
5  
19  
19  
45  
45  
3  
1  
1  
1



14  
2  
2  
5  
3  
8  
28  
18  
18  
29  
1  
1  
1  
1  
1  
1  
1  
1  
1  
1  
1  
1  
1  
1  
1  
1  
3  
29  
2  
2  
2  
2  
2  
6  
11  
16  
17  
3  
3  
3  
18  
2  
2  
12  
1  
1  
1  
1  
1  
1  
1

1  
1  
4  
7  
16  
2  
11  
15  
3  
1  
1  
1  
1  
1  
1  
1  
1  
1  
1  
1  
2  
3  
8  
1  
1  
6  
2  
46  
3  
8  
2  
9  
1  
1  
1  
1  
1  
21  
2  
4  
1  
1  
1  
3  
2  
2  
7  
15  
4  
1

1  
1  
1  
1  
1  
1  
1  
1  
1  
1  
1  
12  
2  
3  
1  
4  
11  
3  
15  
5  
1  
1  
1  
2  
2  
12  
11  
4  
2  
1  
1  
2  
1  
1  
1  
1  
9  
9  
19  
1  
1  
3  
11  
1  
3  
1  
1  
4  
4



3  
3  
8  
3  
2  
4  
5  
2  
12  
2  
4  
1  
1  
1  
1  
1  
1  
2  
5  
2  
2  
2  
3  
1  
1  
1  
1  
1  
1  
1  
1  
1  
1  
1  
1  
1  
1  
1  
1  
1  
1  
1  
1  
1  
1  
1  
5  
8  
2  
2  
3  
3  
3  
3  
2  
4  
1  
1  
1

1  
1  
1  
1  
1  
1  
1  
1  
1  
2  
8  
12  
7  
2  
4  
7  
7  
4  
2  
1  
1  
1  
1  
1  
1  
1  
1  
1  
1  
1  
6  
7  
7  
7  
2  
2  
4  
5  
5  
2  
2  
5  
3  
4  
2  
2  
2  
2  
14  
1  
1  
1

1  
1  
1  
1  
1  
1  
6  
2  
3  
3  
3  
2  
5  
1  
1  
1  
1  
1  
1  
1  
1  
1  
4  
4  
6  
14  
7  
2  
1  
1  
1  
1  
3  
4  
2  
3  
3  
2  
1  
1  
1  
1  
1  
1  
1  
1  
1  
1  
1  
1  
4

2  
2  
2  
2  
5  
5  
4  
11  
11  
2  
3  
3  
4  
12  
1  
1  
4  
6  
2  
11  
4  
2  
1  
1  
1  
1  
1  
1  
1  
1  
1  
1  
1  
1  
1  
1  
1  
6  
3  
3  
4  
1  
1  
1  
1  
1  
1  
1  
1  
1  
1  
1  
4

5  
4  
6  
3  
3  
1  
1  
1  
1  
1  
1  
1  
1  
1  
1  
1  
5  
5  
5  
3  
1  
1  
1  
1  
1  
1  
1  
1  
1  
1  
1  
1  
1  
1  
8  
3  
3  
1  
1  
1  
1  
1  
1  
2  
3  
2  
5  
1  
1  
1

1  
1  
1  
4  
3  
3  
4  
2  
11  
1  
1  
1  
1  
1  
1  
5  
4  
2  
4  
4  
3  
1  
1  
1  
1  
1  
1  
2  
5  
3  
4  
1  
1  
1  
3  
7  
4  
5  
6  
1  
1  
1  
2  
1  
1  
1  
1  
7

2  
10  
1  
1  
1  
1  
1  
4  
3  
7  
1  
1  
1  
1  
1  
1  
1  
1  
1  
1  
1  
1  
1  
2  
2  
7  
1  
1  
1  
1  
1  
1  
1  
1  
1  
1  
3  
2  
2  
1  
7  
2  
1  
1  
1  
1  
2  
2  
2  
2  
2  
2  
3  
1

1  
1  
3  
2  
2  
2  
9  
8  
1  
1  
1  
1  
1  
1  
9  
1  
2  
10  
5  
1  
1  
1  
1  
1  
1  
6  
10  
3  
10  
1  
1  
3  
3  
2  
1  
4  
5  
2  
1  
7  
1  
3  
9  
2  
4  
1  
1  
5  
2



1  
3  
6  
2  
2  
4  
1  
1  
1  
10  
3  
8  
1  
1  
3  
1  
1  
1  
1  
1  
3  
3  
4  
4  
2  
4  
6  
5  
1  
3  
5  
1  
1  
1  
1  
2  
2  
1  
4  
4  
3  
5  
1  
1  
9  
2  
1  
1  
1

2  
1  
1  
1  
2  
1  
8  
8  
9  
1  
2  
2  
1  
1  
1  
2  
2  
8  
1  
1  
1  
5  
7  
1  
5  
3  
3  
4  
1  
2  
3  
3  
5  
2  
1  
1  
3  
3  
2  
3  
8  
1  
1  
2  
1  
1  
1  
3

1  
1  
1  
1  
1  
2  
1  
3  
4  
1  
4  
1  
1  
1  
1  
1  
3  
3  
1  
1  
5  
2  
4  
1  
5  
5  
1  
1  
5  
5  
1  
2  
2  
3  
4  
3  
2  
5  
2  
2  
3  
2  
3  
3  
3  
1  
1  
2  
1  
3

1  
1  
1  
2  
1  
1  
3  
1  
4  
1  
5  
1  
13  
12  
8  
2  
2  
2  
12  
4  
2  
2  
15  
2  
2  
2  
15  
1  
1  
1  
1  
1  
1  
18  
2  
2  
2  
3  
4  
10  
6  
2  
7  
3  
15  
4  
18  
15

3  
3  
2  
2  
2  
2  
1  
1  
1  
1  
1  
1  
1  
1  
1  
1  
16  
6  
5  
3  
6  
8  
3  
7  
2  
2  
2  
5  
13  
13  
5  
3  
1  
1  
1  
1  
1  
4  
3  
3  
10  
3  
2  
6  
12  
8  
1  
1



10  
3  
1  
1  
1  
1  
1  
1  
1  
1  
1  
2  
4  
2  
2  
10  
3  
7  
1  
1  
1  
1  
1  
5  
9  
1  
1  
1  
1  
1  
1  
1  
1  
1  
2  
2  
2  
2  
4  
4  
5  
2  
2  
5  
5  
6  
3  
7  
7  
7  
12

1  
1  
1  
1  
1  
1  
1  
1  
1  
1  
1  
1  
3  
5  
12  
2  
3  
1  
1  
1  
1  
1  
1  
1  
1  
1  
1  
1  
1  
1  
1  
4  
2  
6  
11  
1  
1  
1  
6  
4  
7  
6  
6  
6  
2  
4  
1  
1  
1  
1  
1



1  
9  
3  
2  
2  
1  
1  
1  
1  
1  
3  
1  
1  
3  
7  
6  
3  
2  
1  
1  
1  
1  
1  
1  
1  
1  
4  
4  
5  
3  
3  
1  
1  
1  
1  
1  
1  
1  
1  
1  
2  
2  
1  
1  
1  
1  
1  
1  
1  
1  
5  
8  
1

1  
1  
11  
3  
2  
6  
8  
1  
1  
1  
1  
2  
1  
1  
1  
1  
2  
12  
12  
2  
1  
11  
5  
1  
1  
1  
1  
6  
1  
1  
7  
5  
5  
1  
5  
1  
4  
2  
2  
2  
2  
5  
2  
2  
1  
1  
1  
1

4  
2  
4  
2  
1  
11  
2  
1  
1  
3  
3  
2  
1  
3  
2  
3  
6  
1  
1  
5  
6  
4  
1  
1  
6  
2  
1  
1  
1  
1  
1  
6  
2  
3  
9  
1  
1  
1  
1  
3  
1  
1  
1  
2  
4  
1  
1  
1  
1

3  
1  
1  
4  
3  
1  
1  
4  
2  
5  
3  
1  
2  
2  
2  
10  
1  
3  
1  
1  
6  
3  
6  
4  
1  
1  
1  
10  
2  
6  
1  
3  
3  
2  
2  
2  
2  
10  
3  
1  
1  
2  
4  
1  
2  
1  
1  
1  
1

3  
2  
2  
5  
8  
4  
1  
1  
1  
1  
3  
1  
3  
3  
2  
2  
2  
7  
6  
2  
3  
2  
1  
2  
1  
1  
1  
1  
1  
1  
1  
1  
2  
3  
4  
2  
2  
1  
1  
1  
1  
1  
1  
1  
1  
1  
8  
1  
1  
1  
1  
1  
1  
1  
1  
1

1  
1  
1  
8  
1  
1  
2  
4  
1  
3  
2  
2  
2  
4  
2  
5  
3  
1  
3  
1  
1  
6  
1  
1  
1  
5  
3  
1  
1  
1  
5  
5  
2  
3  
4  
28  
2  
6  
14  
3  
6  
2  
4  
10  
3  
9  
2  
9









2  
16  
8  
6  
1  
1  
1  
1  
1  
1  
1  
1  
1  
1  
1  
1  
1  
1  
1  
1  
1  
2  
4  
6  
2  
1  
1  
1  
1  
1  
1  
1  
1  
1  
1  
1  
1  
1  
1  
1  
1  
1  
2  
8  
5  
3  
7  
4  
15  
3  
11  
3  
3



1  
1  
1  
1  
1  
1  
1  
7  
7  
7  
9  
11  
7  
17  
11  
4  
8  
10  
2  
3  
1  
1  
1  
1  
1  
1  
1  
1  
1  
3  
7  
15  
15  
3  
2  
2  
3  
1  
1  
1  
1  
1  
1  
3  
3  
6  
2  
1  
1

1  
1  
3  
3  
2  
2  
7  
10  
2  
10  
1  
1  
1  
1  
1  
3  
4  
6  
8  
1  
1  
1  
1  
1  
1  
1  
1  
5  
6  
1  
1  
2  
2  
2  
2  
8  
3  
2  
1  
1  
1  
3  
15  
3  
7  
1  
1  
7  
3

15  
1  
1  
1  
1  
14  
2  
1  
1  
1  
1  
3  
3  
11  
11  
13  
4  
6  
2  
1  
1  
1  
1  
1  
1  
1  
8  
4  
8  
1  
1  
12  
8  
8  
5  
6  
2  
8  
4  
3  
11  
9  
8  
4  
11  
2  
1  
1  
4

6  
4  
1  
13  
13  
4  
2  
14  
1  
1  
1  
2  
7  
7  
3  
4  
4  
2  
2  
1  
1  
1  
2  
1  
6  
2  
1  
1  
1  
1  
3  
4  
2  
2  
1  
1  
4  
4  
2  
6  
4  
3  
1  
12  
4  
5  
1  
1

1  
1  
1  
2  
2  
2  
3  
4  
4  
10  
5  
1  
1  
1  
2  
3  
1  
1  
3  
5  
9  
3  
2  
4  
1  
1  
1  
1  
3  
3  
5  
1  
1  
1  
2  
2  
3  
2  
2  
2  
2  
5  
4  
2  
5  
1  
1  
1  
4



2  
1  
2  
1  
1  
1  
1  
2  
4  
1  
1  
2  
3  
1  
3  
2  
3  
2  
4  
1  
3  
9  
2  
2  
6  
1  
4  
4  
4  
4  
2  
1  
1  
1  
2  
1  
9  
1  
2  
1  
2  
1  
4  
11  
6  
1  
1  
2

6  
1  
6  
2  
2  
2  
3  
2  
1  
2  
5  
1  
3  
1  
1  
5  
1  
1  
1  
1  
1  
3  
3  
1  
4  
2  
1  
2  
8  
1  
1  
3  
7  
28  
30  
39  
8  
7  
37  
17  
3  
3  
3  
29  
12  
47  
7  
19  
14

17  
3  
3  
6  
11  
22  
9  
5  
5  
18  
11  
8  
15  
42  
6  
3  
3  
3  
11  
4  
4  
31  
2  
2  
2  
2  
2  
2  
2  
2  
2  
2  
2  
2  
2  
2  
2  
2  
2  
2  
16  
14  
8  
8  
5  
5  
5  
16  
17  
20  
47  
52  
17

12  
6  
6  
63  
4  
4  
4  
4  
4  
5  
10  
7  
12  
29  
19  
8  
32  
3  
3  
3  
3  
3  
3  
3  
3  
3  
11  
32  
68  
23  
7  
8  
16  
12  
4  
4  
4  
28  
34  
6  
6  
33  
12  
12  
7  
24  
37  
9  
12

39

5

5

3

3

3

3

3

2

2

2

2

2

2

2

2

2

2

2

2

2

2

2

2

2

2

6

6

6

17

4

4

4

4

4

12

14

33

5

24

6

6

43

11

12

40

4

4



2  
2  
2  
2  
2  
2  
2  
2  
18  
21  
7  
13  
3  
3  
3  
3  
9  
21  
6  
6  
6  
28  
5  
5  
5  
5  
7  
22  
22  
11  
54  
4  
4  
4  
4  
4  
17  
26  
18  
12  
58  
58  
23  
42  
6  
6  
11  
10

10  
7  
9  
8  
27  
27  
29  
5  
5  
5  
5  
5  
38  
3  
3  
3  
3  
3  
3  
3  
42  
10  
4  
4  
4  
4  
4  
33  
6  
6  
6  
26  
8  
8  
8  
8  
7  
7  
7  
7  
47  
2  
2  
2  
2  
2  
2  
2  
2













1  
1  
1  
1  
1  
1  
1  
1  
1  
1  
1  
1  
1  
1  
1  
1  
1  
1  
1  
1  
1  
1  
48  
45  
9  
3  
3  
3  
3  
3  
3  
3  
3  
3  
3  
3  
3  
3  
3  
3  
3  
3  
23  
14  
48  
5  
5  
7  
7  
10  
6  
6  
49



21  
21  
13  
41  
15  
6  
6  
6  
4  
5  
5  
5  
5  
22  
9  
10  
20  
11  
11  
6  
6  
6  
6  
12  
3  
3  
3  
3  
3  
3  
3  
3  
45  
5  
5  
19  
4  
4  
4  
7  
7  
2  
2  
2  
2  
2  
2  
2  
2



2  
2  
2  
2  
2  
2  
2  
2  
2  
2  
2  
2  
2  
8  
26  
6  
9  
10  
10  
29  
29  
13  
7  
5  
17  
41  
4  
4  
4  
4  
4  
3  
3  
3  
3  
3  
3  
3  
15  
15  
18  
7  
7  
14  
31  
24  
18  
13  
8







1  
1  
1  
1  
1  
1  
1  
1  
1  
1  
1  
1  
1  
1  
1  
1  
1  
1  
1  
1  
1  
1  
1  
1  
1  
1  
1  
1  
1  
1  
1  
1  
1  
1  
1  
1  
1  
1  
1  
1  
1  
1  
1  
1  
1  
1  
1  
1  
1  
17  
16  
50  
36  
6  
6  
2  
2  
2  
2  
2  
2

2  
2  
2  
2  
2  
2  
2  
2  
2  
2  
2  
2  
2  
4  
4  
4  
4  
4  
4  
12  
19  
8  
9  
3  
3  
3  
3  
3  
3  
3  
3  
3  
3  
40  
5  
5  
16  
38  
6  
6  
17  
19  
4  
4  
17  
5  
5  
5  
6  
6

6  
6  
7  
3  
3  
3  
3  
3  
3  
3  
3  
3  
3  
20  
54  
17  
56  
2  
2  
2  
2  
2  
2  
2  
2  
2  
2  
2  
2  
2  
2  
2  
2  
2  
2  
2  
2  
2  
2  
2  
11  
41  
4  
4  
4  
4  
4  
4  
4  
23  
8  
8

















5  
5  
5  
5  
3  
3  
3  
10  
11  
7  
13  
4  
4  
4  
8  
8  
15  
2  
2  
2  
2  
2  
2  
2  
2  
2  
2  
2  
2  
2  
2  
2  
2  
2  
2  
2  
2  
2  
2  
5  
5  
5  
5  
5  
17  
3  
3  
3  
3  
3  
3  
3  
3  
1  
1  
1











1  
1  
1  
9  
9  
9  
8  
26  
5  
5  
10  
4  
4  
8  
8  
3  
3  
3  
3  
2  
2  
2  
2  
2  
2  
2  
2  
2  
2  
2  
2  
2  
2  
2  
2  
4  
4  
4  
3  
3  
3  
1  
1  
1  
1  
1  
1  
1  
1  
1  
1  
1  
1



4  
2  
2  
2  
2  
2  
2  
2  
11  
11  
8  
26  
5  
5  
25  
3  
3  
3  
3  
24  
46  
6  
6  
8  
4  
4  
4  
4  
4  
10  
10  
7  
16  
5  
5  
15  
2  
2  
2  
2  
8  
12  
1  
1  
1  
1  
1  
1  
1

1  
1  
1  
1  
1  
1  
1  
1  
1  
1  
1  
1  
1  
1  
1  
1  
1  
1  
1  
1  
1  
1  
1  
1  
1  
1  
1  
1  
1  
1  
1  
1  
3  
3  
4  
4  
4  
4  
7  
7  
25  
5  
5  
5  
10  
8  
23  
9  
7  
7  
7  
3  
4  
2  
2







5  
4  
4  
19  
2  
2  
2  
2  
2  
2  
3  
3  
1  
1  
1  
1  
1  
1  
1  
1  
1  
1  
1  
1  
1  
1  
1  
1  
1  
1  
1  
1  
1  
1  
1  
1  
1  
1  
1  
1  
1  
1  
1  
1  
1  
4  
4  
2  
2  
2  
2  
5  
3  
12  
14  
1





3  
35  
2  
2  
2  
2  
19  
18  
1  
1  
1  
1  
1  
6  
10  
2  
2  
2  
11  
4  
15  
1  
1  
1  
1  
1  
1  
15  
3  
3  
2  
2  
5  
1  
1  
1  
1  
8  
12  
2  
2  
18  
4  
1  
1  
1  
1  
1

7  
2  
3  
8  
2  
2  
2  
26  
3  
3  
3  
1  
1  
1  
1  
1  
1  
1  
41  
6  
18  
17  
1  
1  
1  
1  
5  
3  
1  
1  
42  
3  
43  
1  
1  
4  
2  
10  
10  
11  
2  
2  
2  
1  
1  
1  
1  
1  
3

4  
6  
3  
1  
2  
2  
1  
1  
11  
2  
13  
1  
5  
1  
1  
6  
2  
1  
1  
1  
1  
1  
1  
3  
3  
1  
27  
7  
13  
2  
2  
10  
11  
5  
2  
2  
2  
2  
10  
10  
8  
4  
18  
2  
2  
10  
9  
8  
2





1  
1  
1  
1  
1  
1  
1  
1  
1  
1  
1  
1  
1  
1  
1  
1  
1  
1  
1  
1  
1  
1  
1  
1  
2  
2  
2  
2  
13  
12  
2  
2  
2  
2  
2  
3  
7  
5  
12  
13  
3  
13  
13  
2  
2  
2  
4  
7

4  
5  
2  
2  
2  
2  
2  
12  
5  
7  
3  
9  
3  
2  
1  
1  
1  
1  
1  
1  
1  
1  
1  
1  
1  
1  
1  
1  
1  
1  
1  
1  
1  
1  
1  
1  
1  
1  
1  
1  
1  
1  
1  
1  
1  
1  
1  
1  
12  
11  
4  
4  
11  
2  
6  
12



3  
4  
8  
3  
8  
6  
2  
4  
4  
2  
3  
4  
1  
1  
1  
1  
1  
1  
1  
1  
1  
1  
1  
1  
1  
1  
1  
1  
1  
1  
1  
1  
1  
1  
1  
1  
1  
1  
1  
3  
2  
2  
2  
2  
2  
4  
3  
4  
3  
2  
2  
2  
4  
2

2  
2  
3  
1  
1  
1  
1  
1  
1  
1  
1  
1  
1  
1  
1  
1  
1  
1  
1  
1  
1  
1  
1  
1  
1  
1  
1  
1  
1  
1  
1  
1  
1  
1  
1  
1  
1  
1  
1  
1  
1  
1  
1  
1  
3  
7  
2  
2  
2  
2  
2  
14  
4  
5  
2  
1  
1  
1  
1  
1

1  
1  
1  
1  
1  
1  
1  
1  
1  
1  
1  
1  
3  
1  
1  
1  
1  
1  
1  
1  
1  
1  
1  
1  
1  
1  
1  
1  
1  
1  
1  
1  
1  
1  
1  
1  
1  
1  
1  
1  
1  
1  
1  
1  
1  
1  
1  
1  
1  
1  
1  
1  
1  
1  
2  
2  
2  
2  
2  
4  
4  
2  
2  
2  
1  
1  
1  
1

1  
1  
1  
1  
1  
1  
1  
1  
1  
1  
1  
1  
1  
1  
7  
3  
2  
2  
9  
5  
12  
12  
12  
5  
2  
2  
6  
1  
1  
1  
1  
1  
1  
1  
1  
1  
1  
1  
1  
1  
1  
1  
1  
1  
2  
2  
6  
2  
5  
5  
3  
7  
11  
5

2  
2  
8  
7  
1  
1  
1  
1  
1  
1  
1  
1  
1  
1  
1  
1  
1  
2  
7  
3  
5  
2  
1  
1  
1  
1  
1  
1  
1  
1  
1  
1  
1  
1  
1  
1  
1  
1  
3  
4  
3  
1  
1  
1  
1  
1  
1  
1  
2  
5  
3  
4  
1  
1  
1  
1



1  
1  
1  
1  
1  
1  
1  
1  
1  
1  
3  
11  
1  
1  
1  
1  
1  
1  
1  
1  
1  
1  
1  
1  
5  
2  
9  
11  
2  
2  
1  
1  
1  
1  
1  
1  
1  
3  
4  
7  
4  
4  
6  
10  
1  
1  
1  
1  
1  
1  
1  
1

1  
1  
1  
1  
10  
3  
3  
5  
3  
3  
5  
2  
1  
1  
1  
1  
1  
1  
1  
1  
1  
1  
1  
1  
8  
3  
10  
11  
1  
1  
2  
2  
2  
2  
2  
2  
2  
2  
7  
11  
3  
3  
1  
1  
1  
1  
1  
1  
1  
1  
1  
1  
1

1  
1  
4  
6  
3  
5  
4  
1  
1  
1  
1  
1  
1  
1  
4  
11  
3  
2  
2  
1  
1  
1  
1  
1  
1  
1  
1  
1  
1  
3  
3  
2  
1  
1  
1  
1  
1  
1  
1  
1  
1  
1  
1  
1  
1  
1  
7  
4  
2  
2  
5  
1  
1  
1  
1

1  
1  
5  
2  
9  
1  
1  
1  
1  
1  
1  
1  
1  
1  
1  
1  
1  
1  
2  
2  
2  
2  
2  
2  
3  
4  
1  
1  
1  
2  
2  
2  
1  
1  
1  
1  
1  
1  
1  
1  
1  
2  
3  
2  
2  
1  
1  
1  
1  
1  
1  
1  
1  
7

1  
1  
1  
1  
1  
1  
5  
2  
2  
3  
8  
1  
1  
1  
1  
1  
1  
1  
1  
1  
1  
1  
1  
4  
3  
2  
5  
1  
1  
4  
3  
3  
8  
1  
1  
1  
1  
1  
1  
1  
1  
3  
2  
9  
10  
1  
1  
1  
1  
1  
1  
3

3  
4  
3  
1  
1  
1  
1  
1  
2  
2  
2  
6  
1  
1  
1  
2  
9  
2  
3  
4  
1  
1  
1  
1  
1  
2  
1  
1  
5  
4  
2  
3  
1  
1  
1  
1  
2  
2  
1  
1  
1  
1  
1  
1  
1  
1  
5  
3  
4

3  
1  
1  
1  
1  
1  
1  
1  
1  
1  
6  
3  
3  
1  
1  
1  
4  
1  
1  
6  
1  
1  
1  
1  
1  
1  
1  
1  
1  
1  
2  
1  
1  
5  
1  
1  
1  
1  
7  
3  
1  
1  
1  
1  
1  
2  
2  
2  
1  
2  
8

1  
1  
1  
1  
1  
1  
1  
1  
1  
8  
2  
1  
1  
2  
3  
1  
1  
1  
2  
1  
1  
1  
1  
1  
1  
2  
4  
1  
2  
1  
4  
1  
1  
1  
1  
1  
1  
1  
1  
1  
1  
1  
1  
1  
1  
1  
1  
3  
2  
1  
2  
2  
1  
1  
1  
2  
1  
1  
7  
1  
3



1  
2  
2  
3  
6  
1  
1  
2  
2  
1  
5  
1  
3  
1  
1  
1  
1  
1  
1  
1  
4  
1  
2  
1  
1  
1  
1  
1  
1  
1  
1  
1  
1  
1  
1  
3  
2  
2  
1  
1  
1  
1  
1  
1  
5  
1  
1  
1  
1  
1  
2  
10  
5  
4  
2



1  
1  
1  
1  
1  
1  
1  
1  
1  
1  
1  
1  
1  
1  
1  
2  
7  
17  
2  
2  
2  
2  
3  
10  
3  
7  
7  
2  
2  
6  
6  
3  
2  
2  
5  
3  
3  
2  
2  
2  
2  
1  
1  
1  
1  
1  
1  
1  
1  
1  
1



1  
1  
1  
1  
1  
1  
1  
1  
1  
5  
3  
3  
4  
3  
2  
2  
2  
2  
4  
1  
1  
1  
1  
1  
1  
1  
1  
1  
1  
1  
1  
1  
1  
1  
1  
1  
1  
1  
1  
1  
1  
1  
1  
3  
3  
7  
2  
5  
5  
2  
2  
4  
4  
4  
4  
3  
1  
1





1  
1  
1  
1  
1  
1  
1  
1  
1  
1  
1  
1  
1  
1  
2  
6  
2  
2  
2  
13  
13  
7  
3  
3  
4  
9  
2  
2  
2  
3  
3  
1  
1  
1  
1  
1  
1  
1  
1  
1  
1  
1  
1  
3  
2  
2  
2  
9  
1  
1  
1  
1



1  
1  
1  
1  
1  
1  
1  
1  
1  
1  
1  
1  
6  
10  
2  
5  
1  
1  
1  
1  
1  
1  
1  
1  
1  
1  
1  
1  
1  
1  
1  
1  
1  
1  
1  
1  
1  
2  
8  
2  
2  
2  
1  
1  
1  
1  
1  
1  
3  
2  
2  
2  
3  
1

1  
1  
1  
1  
1  
1  
1  
1  
1  
1  
1  
1  
2  
2  
2  
3  
1  
1  
1  
1  
1  
1  
2  
2  
6  
3  
9  
11  
1  
1  
1  
1  
1  
1  
1  
1  
1  
1  
7  
4  
3  
2  
2  
9  
2  
2  
1  
1  
1  
1

1  
1  
1  
4  
6  
3  
2  
2  
1  
1  
1  
1  
1  
1  
1  
1  
1  
3  
2  
3  
1  
1  
1  
1  
1  
1  
1  
1  
1  
1  
4  
4  
3  
3  
2  
2  
2  
2  
1  
1  
1  
1  
1  
1  
1  
3  
5  
6  
1  
1  
1  
1  
1  
1  
3

3  
6  
2  
1  
1  
1  
1  
1  
1  
1  
1  
1  
1  
2  
2  
11  
8  
4  
3  
3  
1  
1  
1  
1  
1  
1  
1  
4  
2  
4  
4  
4  
5  
5  
5  
3  
4  
1  
1  
1  
1  
1  
1  
1  
2  
5  
10  
1  
1  
1

1  
2  
4  
6  
3  
3  
1  
1  
1  
1  
1  
2  
7  
5  
2  
1  
1  
1  
1  
1  
1  
1  
11  
5  
6  
3  
1  
1  
1  
1  
1  
1  
1  
2  
2  
4  
1  
1  
1  
8  
1  
1  
1  
1  
1  
1  
7  
2  
1  
1

1  
1  
1  
1  
1  
1  
1  
1  
1  
1  
2  
6  
2  
4  
1  
1  
1  
1  
3  
2  
2  
5  
3  
2  
1  
1  
1  
1  
1  
7  
4  
2  
3  
1  
1  
1  
1  
1  
2  
4  
4  
4  
2  
1  
1  
1  
1  
1  
2  
4  
8

1  
1  
1  
3  
6  
2  
5  
1  
10  
2  
4  
1  
5  
2  
3  
1  
1  
1  
1  
1  
1  
3  
1  
1  
1  
1  
3  
3  
3  
1  
1  
5  
1  
1  
3  
9  
9  
9  
1  
1  
4  
8  
1  
1  
1  
1  
1  
1

1  
2  
1  
2  
3  
7  
5  
1  
1  
4  
1  
9  
1  
1  
2  
1  
2  
1  
4  
1  
4  
1  
1  
2  
1  
2  
2  
2  
3  
3  
1  
8  
1  
1  
3  
2  
2  
1  
1  
1  
1  
1  
1  
4  
3  
1  
1  
2  
2  
1



1  
1  
1  
1  
2  
1  
1  
2  
1  
1  
1  
1  
1  
5  
4  
1  
1  
3  
1  
3  
2  
1  
1  
2  
1  
2  
1  
1  
2  
1  
6  
1  
4  
2  
2  
3  
1  
1  
2  
2  
1  
1  
1  
1  
2  
1  
5  
3  
1

1  
5  
5  
1  
1  
5  
5  
5  
7  
5  
5  
2  
4  
2  
1  
1  
2  
5  
1  
3  
1  
2  
1  
2  
1  
1  
1  
1  
1  
1  
1  
1  
5  
1  
3  
2  
10  
4  
2  
2  
10  
4  
3  
3  
2  
5  
3  
5  
3  
2  
3



1  
1  
1  
1  
1  
1  
1  
1  
1  
1  
1  
1  
1  
3  
9  
13  
6  
6  
5  
4  
3  
9  
2  
4  
9  
9  
4  
3  
3  
9  
12  
11  
6  
4  
4  
3  
8  
2  
2  
2  
9  
6  
3  
10  
2  
2  
2  
2

13

4

1

1

1

1

1

1

1

1

1

1

1

1

1

1

1

1

1

1

1

1

1

1

1

1

1

1

1

1

1

1

1

1

1

1

1

1

1

1

1

1

1

3

17

7

2

3



1  
1  
1  
1  
1  
1  
1  
1  
1  
1  
1  
1  
1  
1  
1  
1  
1  
1  
1  
1  
17  
8  
2  
2  
4  
3  
3  
9  
9  
2  
7  
10  
3  
4  
15  
7  
2  
2  
2  
3  
3  
3  
3  
3  
3  
5  
1  
1  
1  
1









8  
5  
3  
2  
2  
6  
6  
10  
10  
6  
4  
2  
2  
2  
16  
1  
1  
1  
1  
1  
1  
1  
1  
1  
1  
1  
1  
1  
1  
1  
1  
1  
1  
5  
5  
5  
4  
14  
4  
13  
2  
2  
2  
2  
2  
2  
3  
8  
3  
3  
3  
4  
2



1  
1  
1  
1  
1  
1  
13  
10  
3  
11  
6  
6  
2  
3  
3  
3  
3  
5  
2  
3  
1  
1  
1  
1  
1  
1  
1  
1  
1  
1  
1  
1  
1  
1  
1  
1  
1  
1  
1  
1  
1  
1  
1  
11  
2  
2  
13  
6  
3  
3  
3  
3  
13  
2  
2  
2





2  
2  
2  
2  
2  
3  
5  
2  
11  
16  
1  
1  
1  
1  
1  
1  
1  
1  
1  
1  
1  
1  
1  
1  
1  
1  
7  
3  
7  
2  
4  
2  
2  
1  
1  
1  
1  
1  
1  
8  
3  
3  
9  
4  
2  
2  
2  
2  
3  
8  
1  
1  
1





1  
1  
5  
2  
6  
1  
1  
1  
1  
1  
1  
1  
1  
10  
3  
2  
2  
1  
1  
1  
1  
1  
1  
1  
1  
1  
1  
1  
1  
1  
4  
2  
3  
3  
1  
1  
1  
1  
1  
1  
1  
1  
1  
1  
2  
3  
12  
4  
4  
5  
1  
1  
1  
1

1  
3  
3  
3  
3  
1  
1  
1  
1  
1  
1  
1  
4  
10  
2  
2  
12  
1  
1  
1  
1  
1  
1  
1  
1  
1  
1  
1  
1  
2  
3  
1  
1  
1  
1  
1  
1  
2  
3  
2  
2  
2  
1  
1  
1  
1  
1  
2  
2  
2  
3  
1  
2  
5  
4

2  
2  
1  
1  
1  
1  
2  
6  
1  
1  
1  
1  
3  
4  
5  
2  
1  
1  
1  
1  
1  
1  
3  
2  
2  
4  
1  
1  
1  
1  
1  
1  
1  
1  
1  
1  
1  
1  
6  
1  
1  
1  
1  
1  
4  
4  
3  
3  
2  
2

1  
1  
1  
1  
2  
1  
1  
1  
1  
1  
1  
1  
1  
2  
2  
2  
1  
1  
1  
1  
4  
2  
2  
6  
8  
1  
1  
2  
1  
1  
1  
8  
2  
2  
2  
6  
8  
1  
1  
3  
2  
1  
1  
7  
2  
1  
1  
1  
1  
3

1  
1  
2  
3  
4  
4  
1  
1  
1  
1  
1  
2  
1  
1  
2  
2  
3  
4  
1  
2  
1  
4  
1  
1  
2  
1  
1  
1  
1  
1  
6  
1  
1  
1  
1  
2  
5  
1  
4  
1  
3  
1  
10  
4  
1  
3  
2  
2  
2

1  
1  
1  
2  
1  
2  
1  
1  
1  
2  
1  
3  
1  
1  
7  
2  
7  
3  
7  
2  
2  
1  
4  
28  
19  
10  
10  
19  
11  
10  
24  
14  
6  
6  
46  
9  
11  
18  
12  
11  
7  
17  
20  
13  
13  
10  
23  
39

20  
28  
13  
3  
18  
9  
2  
6  
23  
3  
12  
18  
6  
16  
26  
14  
8  
25  
35  
36  
13  
35  
5  
38  
9  
7  
15  
3  
3  
42  
34  
21  
9  
9  
6  
15  
10  
13  
12  
5  
8  
9  
42  
30  
6  
12  
11  
14



6  
6  
3  
27  
11  
11  
28  
6  
7  
8  
13  
22  
15  
4  
10  
13  
9  
5  
7  
49  
11  
3  
12  
8  
16  
4  
30  
7  
10  
4  
15  
25  
7  
14  
5  
4  
4  
3  
13  
7  
27  
20  
25  
6  
1  
13  
29  
17

14  
36  
4  
14  
3  
12  
12  
12  
20  
5  
5  
4  
10  
7  
5  
3  
12  
13  
20  
6  
10  
11  
7  
7  
4  
30  
1  
5  
5  
18  
21  
22  
12  
26  
8  
28  
14  
5  
15  
6  
8  
9  
15  
17  
24  
5  
5  
7

9  
9  
15  
10  
10  
11  
10  
16  
14  
45  
11  
4  
9  
22  
2  
6  
9  
8  
12  
1  
1  
3  
18  
11  
22  
2  
17  
4  
4  
20  
5  
3  
10  
10  
6  
16  
7  
17  
17  
3  
16  
18  
35  
9  
13  
15  
7  
10

1  
15  
3  
10  
7  
7  
13  
24  
19  
4  
5  
15  
10  
17  
2  
2  
10  
10  
6  
8  
11  
15  
6  
8  
8  
10  
16  
4  
7  
7  
19  
9  
7  
3  
2  
18  
11  
10  
10  
16  
10  
3  
6  
6  
17  
18  
16  
9

12  
12  
5  
5  
12  
17  
2  
2  
2  
3  
8  
20  
4  
2  
13  
13  
1  
6  
6  
11  
3  
9  
12  
19  
3  
4  
6  
16  
5  
7  
15  
4  
7  
5  
5  
13  
9  
9  
11  
1  
7  
9  
6  
9  
5  
1  
5  
1

2  
3  
3  
3  
4  
4  
2  
5  
3  
2  
2  
3  
7  
10  
7  
3  
4  
7  
5  
10  
4  
2  
5  
2  
2  
4  
2  
6  
3  
5  
5  
3  
2  
2  
4  
3  
3  
5  
1  
2  
4  
5  
2  
1  
3  
2  
2  
1

5  
2  
2  
2  
4  
2  
6  
3  
5  
1  
4  
2  
5  
1  
1  
1  
3  
1  
4  
1  
1  
2  
1  
1  
1  
1  
3  
5  
2  
2  
2  
2  
1  
2  
1  
3  
4  
4  
2  
2  
1  
1  
2  
5  
1  
1  
2  
1  
1  
2

2  
2  
1  
4  
5  
5  
2  
6  
5  
2  
2  
2  
3  
3  
2  
2  
1  
3  
2  
3  
3  
2  
1  
1  
2  
2  
2  
1  
4  
2  
1  
2  
2  
5  
2  
1  
1  
1  
1  
1  
2  
1  
2  
2  
2  
3  
1  
1  
1  
1  
1





3  
1  
5  
1  
1  
1  
1  
1  
2  
1  
1  
1  
1  
1  
1  
1  
1  
2  
3  
1  
4  
1  
2  
1  
1  
1  
1  
1  
1  
1  
1  
1  
1  
1  
1  
7  
5  
12  
6  
3  
7  
2  
3  
3  
3  
3  
4  
1  
2  
4  
5  
2  
3  
4

2  
2  
9  
3  
5  
3  
3  
3  
2  
2  
2  
7  
3  
6  
4  
3  
2  
5  
3  
3  
3  
1  
1  
4  
4  
2  
5  
4  
1  
4  
4  
4  
7  
2  
2  
3  
1  
1  
2  
6  
3  
1  
4  
1  
1  
1  
2  
1  
2

2  
1  
1  
1  
1  
1  
1  
2  
1  
1  
2  
3  
3  
4  
1  
6  
1  
2  
2  
2  
2  
1  
1  
1  
7  
1  
1  
1  
4  
1  
2  
2  
1  
3  
2  
2  
2  
1  
1  
1  
1  
4  
1  
1  
2  
3  
3  
3

1  
1  
1  
1  
1  
1  
2  
2  
2  
1  
2  
1  
1  
1  
2  
1  
3  
2  
1  
1  
2  
1  
4  
1  
1  
2  
2  
1  
1  
2  
2  
2  
2  
1  
1  
1  
1  
2  
1  
1  
1  
2  
1  
1  
2  
1  
1  
2  
3  
1  
1  
1  
3



3  
8  
4  
10  
6  
4  
4  
3  
6  
10  
2  
2  
4  
13  
6  
2  
5  
8  
4  
8  
6  
4  
11  
12  
3  
5  
8  
4  
7  
5  
5  
3  
11  
10  
5  
1  
4  
4  
5  
4  
6  
2  
7  
4  
4  
4  
2  
7

10  
5  
8  
5  
4  
4  
4  
5  
4  
1  
3  
9  
5  
3  
7  
1  
7  
4  
5  
7  
3  
2  
2  
2  
6  
3  
2  
4  
4  
4  
3  
3  
3  
9  
2  
3  
4  
3  
3  
3  
3  
2  
2  
2  
3  
2  
1  
3  
4  
3



4  
7  
3  
9  
2  
5  
5  
5  
3  
3  
3  
6  
3  
3  
2  
5  
5  
1  
2  
4  
6  
6  
6  
6  
7  
2  
2  
1  
5  
2  
4  
3  
1  
4  
2  
3  
6  
3  
3  
3  
4  
3  
3  
1  
5  
2  
1  
1  
1  
3  
1

4  
2  
3  
1  
2  
5  
4  
4  
1  
1  
4  
5  
2  
3  
1  
1  
4  
4  
2  
1  
4  
3  
2  
7  
4  
1  
1  
3  
2  
2  
5  
6  
3  
2  
1  
3  
2  
4  
2  
1  
3  
5  
2  
3  
1  
1  
1  
4

10  
1  
1  
2  
2  
3  
2  
5  
2  
2  
2  
2  
2  
1  
3  
2  
5  
2  
3  
2  
4  
3  
5  
3  
1  
7  
9  
4  
1  
3  
1  
2  
1  
1  
4  
1  
4  
1  
2  
2  
1  
1  
6  
1  
1  
2  
1  
1

3  
1  
1  
2  
1  
1  
1  
1  
1
