# Supplementary material for: [Retracted] Disorder Genes Regulate the Progression of Ischemic Stroke through the NF‐κB Signaling Pathway
Source: Hindawi journal article supplement (doi:10.1155/2021/2464269), 2021-01-01
Supplement: f3 [file 2464269.f3.pdf]

**Table S3. ncRNA pivot that regulates modular genes**

| module | pivot     | moduleLin | Pvalue   |
|--------|-----------|-----------|----------|
| m1     | mmu-miR-  | 20        | 0.003938 |
| m1     | mmu-miR-  | 23        | 0.002092 |
| m1     | mmu-miR-  | 73        | 0.004934 |
| m1     | mmu-miR-  | 56        | 0.001269 |
| m1     | G730013B0 | 99        | 0.001128 |
| m1     | mmu-miR-  | 39        | 0.000101 |
| m1     | mmu-miR-  | 45        | 0.009514 |
| m1     | mmu-miR-  | 6         | 0.004549 |
| m1     | mmu-miR-  | 45        | 0.004529 |
| m1     | mmu-miR-  | 5         | 0.005065 |
| m1     | mmu-miR-  | 36        | 0.00136  |
| m1     | mmu-miR-  | 5         | 0.007869 |
| m1     | mmu-mir-  | 4         | 0.008301 |
| m1     | mmu-miR-  | 6         | 0.004549 |
| m1     | mmu-mir-  | 3         | 0.005539 |
| m1     | Snord1c   | 5         | 0.007869 |
| m1     | 4930547M0 | 4         | 0.004564 |
| m1     | 4731419I0 | 5         | 0.000826 |
| m1     | Gm9793    | 5         | 0.007869 |
| m1     | Snord49b  | 6         | 0.004549 |
| m1     | 4930461G1 | 5         | 0.000342 |
| m1     | 9330151L1 | 4         | 0.008301 |
| m1     | Gm12866   | 4         | 0.008301 |
| m2     | mmu-miR-  | 11        | 0.007613 |
| m2     | mmu-miR-  | 10        | 0.008388 |
| m2     | mmu-miR-  | 11        | 0.004085 |
| m2     | mmu-miR-  | 9         | 0.007418 |
| m2     | mmu-miR-  | 9         | 0.009439 |
| m2     | mmu-miR-  | 4         | 0.009936 |
| m2     | mmu-miR-  | 17        | 0.002118 |
| m2     | mmu-miR-  | 15        | 2.18E-05 |
| m2     | mmu-miR-  | 15        | 0.000748 |
| m2     | mmu-miR-  | 12        | 0.000278 |
| m2     | mmu-miR-  | 11        | 0.003485 |
| m2     | mmu-mir-  | 2         | 0.007046 |
| m2     | mmu-miR-  | 2         | 0.004767 |
| m2     | Gm16160   | 2         | 0.009719 |
| m2     | Gm16701   | 2         | 0.009719 |
| m2     | Snord115  | 2         | 0.001473 |
| m2     | 9530036O0 | 2         | 0.009719 |
| m2     | Fam150a   | 2         | 0.002903 |
| m2     | 9330111N0 | 2         | 0.009719 |
| m2     | mmu-miR-  | 19        | 0.009865 |
| m2     | mmu-miR-  | 2         | 0.007046 |
| m3     | mmu-miR-  | 2         | 0.009194 |
| m3     | mmu-miR-  | 12        | 0.002211 |

|    |          |    |          |
|----|----------|----|----------|
| m3 | mmu-miR- | 13 | 0.007318 |
| m3 | mmu-miR- | 3  | 0.000333 |
| m3 | mmu-miR- | 2  | 0.004506 |
| m4 | mmu-miR- | 28 | 0.005047 |
| m4 | mmu-miR- | 6  | 0.006474 |
| m4 | mmu-miR- | 8  | 0.002711 |
| m4 | mmu-miR- | 4  | 0.004521 |
| m4 | mmu-miR- | 3  | 0.000862 |
| m4 | mmu-miR- | 2  | 0.008488 |
| m4 | mmu-miR- | 2  | 0.008488 |
