# Supplementary material for: [Retracted] Disorder Genes Regulate the Progression of Ischemic Stroke through the NF‐κB Signaling Pathway
Source: Hindawi journal article supplement (doi:10.1155/2021/2464269), 2021-01-01
Supplement: f4 [file 2464269.f4.pdf]

**Table S4. TF pivot that regulates modular genes**

| module | pivot  | moduleLin | Pvalue   |
|--------|--------|-----------|----------|
| m1     | Sp1    | 45        | 0.000122 |
| m1     | Nfe2l2 | 12        | 0.003929 |
| m1     | Smad2  | 6         | 0.007318 |
| m1     | Nfkb1  | 32        | 0.002551 |
| m1     | Ctnnb1 | 13        | 0.005511 |
| m1     | Nr1h2  | 6         | 0.000449 |
| m1     | Cnot3  | 2         | 0.009436 |
| m1     | Nfkbia | 2         | 0.009436 |
| m2     | Sp1    | 15        | 1.40E-05 |
| m2     | Sp2    | 2         | 0.008857 |
| m2     | Irf7   | 2         | 0.005276 |
| m3     | Jun    | 8         | 0.001263 |
| m3     | Ctnnb1 | 5         | 0.003413 |
| m3     | Gli2   | 3         | 0.001421 |
| m3     | Foxa2  | 4         | 0.004109 |
| m3     | Tle2   | 2         | 0.001621 |
| m3     | Nr3c2  | 2         | 0.005495 |
| m4     | Hnf4a  | 4         | 0.008596 |
| m4     | Mybl2  | 4         | 0.000155 |
