# Supplementary material for: [Retracted] Disorder Genes Regulate the Progression of Ischemic Stroke through the NF‐κB Signaling Pathway
Source: Hindawi journal article supplement (doi:10.1155/2021/2464269), 2021-01-01
Supplement: f5 [file 2464269.f5.pdf]

**Table S5.ncRNA\_Target\_Gene**

| Module_Gepivot      | moduleLin | Pvalue   | module | Target_gene   |
|---------------------|-----------|----------|--------|---------------|
| m1-11100!mmu-miR-   | 23        | 0.002092 | m1     | 1110059G10Rik |
| m1-11100!mmu-miR-   | 20        | 0.003938 | m1     | 1110059G10Rik |
| m1-16000!mmu-miR-   | 73        | 0.004934 | m1     | 1600002H07Rik |
| m1-17000!G730013B(  | 99        | 0.001128 | m1     | 1700052K11Rik |
| m1-18100!mmu-miR-   | 56        | 0.001269 | m1     | 1810055G02Rik |
| m1-22100!G730013B(  | 99        | 0.001128 | m1     | 2210016F16Rik |
| m1-28104!G730013B(  | 99        | 0.001128 | m1     | 2810408A11Rik |
| m1-28104!mmu-miR-   | 39        | 0.000101 | m1     | 2810474O19Rik |
| m1-49305!mmu-miR-   | 45        | 0.009514 | m1     | 4930523C07Rik |
| m1-49305!mmu-miR-   | 73        | 0.004934 | m1     | 4930523C07Rik |
| m1-A6300!mmu-miR-   | 23        | 0.002092 | m1     | A630001G21Rik |
| m1-A6300!mmu-miR-   | 73        | 0.004934 | m1     | A630001G21Rik |
| m1-A6300!mmu-miR-   | 20        | 0.003938 | m1     | A630001G21Rik |
| m1-Abat!mmu-miR-    | 56        | 0.001269 | m1     | Abat          |
| m1-Abat!G730013B(   | 99        | 0.001128 | m1     | Abat          |
| m1-Abca6!mmu-miR-   | 6         | 0.004549 | m1     | Abca6         |
| m1-Abtb1!mmu-miR-   | 45        | 0.004529 | m1     | Abtb1         |
| m1-Acp6!G730013B(   | 99        | 0.001128 | m1     | Acp6          |
| m1-Adamt!mmu-miR-   | 73        | 0.004934 | m1     | Adamts9       |
| m1-Adh5!mmu-miR-    | 45        | 0.004529 | m1     | Adh5          |
| m1-Adh5!mmu-miR-    | 45        | 0.009514 | m1     | Adh5          |
| m1-Adm!mmu-miR-     | 45        | 0.009514 | m1     | Adm           |
| m1-Adm!mmu-miR-     | 56        | 0.001269 | m1     | Adm           |
| m1-Adss!mmu-miR-    | 56        | 0.001269 | m1     | Adss          |
| m1-Adss!mmu-miR-    | 45        | 0.004529 | m1     | Adss          |
| m1-Ahctf1!mmu-miR-  | 73        | 0.004934 | m1     | Ahctf1        |
| m1-AI5934!mmu-miR-  | 56        | 0.001269 | m1     | AI593442      |
| m1-AI6078!G730013B( | 99        | 0.001128 | m1     | AI607873      |
| m1-Ankfy1!mmu-miR-  | 73        | 0.004934 | m1     | Ankfy1        |
| m1-Ankra2!mmu-miR-  | 56        | 0.001269 | m1     | Ankra2        |
| m1-Ankra2!mmu-miR-  | 45        | 0.004529 | m1     | Ankra2        |
| m1-Ankrd4!mmu-miR-  | 56        | 0.001269 | m1     | Ankrd44       |
| m1-Ankrd4!mmu-miR-  | 45        | 0.004529 | m1     | Ankrd44       |
| m1-Antxr2!G730013B( | 99        | 0.001128 | m1     | Antxr2        |
| m1-App1!mmu-miR-    | 73        | 0.004934 | m1     | App1          |
| m1-Arhgap!mmu-miR-  | 73        | 0.004934 | m1     | Arhgap11a     |
| m1-Arhgap!G730013B( | 99        | 0.001128 | m1     | Arhgap9       |
| m1-Arl4a!mmu-miR-   | 5         | 0.005065 | m1     | Arl4a         |
| m1-Arl6ip5!mmu-miR- | 56        | 0.001269 | m1     | Arl6ip5       |
| m1-Arrdc4!mmu-miR-  | 45        | 0.004529 | m1     | Arrdc4        |
| m1-Arrdc4!mmu-miR-  | 56        | 0.001269 | m1     | Arrdc4        |
| m1-Atg10!mmu-miR-   | 73        | 0.004934 | m1     | Atg10         |
| m1-Atp5a1!mmu-miR-  | 73        | 0.004934 | m1     | Atp5a1        |
| m1-Avpr1a!G730013B( | 99        | 0.001128 | m1     | Avpr1a        |
| m1-Bpnt1!mmu-miR-   | 39        | 0.000101 | m1     | Bpnt1         |
| m1-Brwd1!mmu-miR-   | 36        | 0.00136  | m1     | Brwd1         |

|                    |    |          |    |         |
|--------------------|----|----------|----|---------|
| m1-Camk2mmu-miR-   | 56 | 0.001269 | m1 | Camk2n1 |
| m1-Camk2mmu-miR-   | 45 | 0.009514 | m1 | Camk2n1 |
| m1-Camk2mmu-miR-   | 45 | 0.004529 | m1 | Camk2n1 |
| m1-Cand1 G730013B( | 99 | 0.001128 | m1 | Cand1   |
| m1-Canx G730013B(  | 99 | 0.001128 | m1 | Canx    |
| m1-Canx mmu-miR-   | 45 | 0.009514 | m1 | Canx    |
| m1-Casp8 mmu-miR-  | 23 | 0.002092 | m1 | Casp8   |
| m1-Casp8 mmu-miR-  | 20 | 0.003938 | m1 | Casp8   |
| m1-Cbr4 G730013B(  | 99 | 0.001128 | m1 | Cbr4    |
| m1-Ccl28 mmu-miR-  | 73 | 0.004934 | m1 | Ccl28   |
| m1-Ccne2 mmu-miR-  | 45 | 0.009514 | m1 | Ccne2   |
| m1-Cd80 G730013B(  | 99 | 0.001128 | m1 | Cd80    |
| m1-Cd93 mmu-miR-   | 39 | 0.000101 | m1 | Cd93    |
| m1-Cdc7 mmu-miR-   | 73 | 0.004934 | m1 | Cdc7    |
| m1-Cdc7 mmu-miR-   | 36 | 0.00136  | m1 | Cdc7    |
| m1-Cdk1 G730013B(  | 99 | 0.001128 | m1 | Cdk1    |
| m1-Cdk7 mmu-miR-   | 39 | 0.000101 | m1 | Cdk7    |
| m1-Cdkn1 mmu-miR-  | 39 | 0.000101 | m1 | Cdkn1a  |
| m1-Cend1 mmu-miR-  | 45 | 0.009514 | m1 | Cend1   |
| m1-Cend1 mmu-miR-  | 45 | 0.004529 | m1 | Cend1   |
| m1-Cep17 mmu-miR-  | 73 | 0.004934 | m1 | Cep170b |
| m1-Cep35 mmu-miR-  | 56 | 0.001269 | m1 | Cep350  |
| m1-Cep35 mmu-miR-  | 73 | 0.004934 | m1 | Cep350  |
| m1-Cep35 mmu-miR-  | 45 | 0.009514 | m1 | Cep350  |
| m1-Cep35 mmu-miR-  | 45 | 0.004529 | m1 | Cep350  |
| m1-Cgn G730013B(   | 99 | 0.001128 | m1 | Cgn     |
| m1-Chic1 mmu-miR-  | 73 | 0.004934 | m1 | Chic1   |
| m1-Chic1 mmu-miR-  | 23 | 0.002092 | m1 | Chic1   |
| m1-Chic1 mmu-miR-  | 20 | 0.003938 | m1 | Chic1   |
| m1-Chic1 mmu-miR-  | 45 | 0.004529 | m1 | Chic1   |
| m1-Clpx mmu-miR-   | 45 | 0.004529 | m1 | Clpx    |
| m1-Clpx mmu-miR-   | 36 | 0.00136  | m1 | Clpx    |
| m1-Clpx mmu-miR-   | 56 | 0.001269 | m1 | Clpx    |
| m1-Col5a1G730013B( | 99 | 0.001128 | m1 | Col5a1  |
| m1-Copg2G730013B(  | 99 | 0.001128 | m1 | Copg2   |
| m1-Coq9 G730013B(  | 99 | 0.001128 | m1 | Coq9    |
| m1-Cpeb3 G730013B( | 99 | 0.001128 | m1 | Cpeb3   |
| m1-Csnk1εmmu-miR-  | 73 | 0.004934 | m1 | Csnk1e  |
| m1-Csrnp3mmu-miR-  | 20 | 0.003938 | m1 | Csrnp3  |
| m1-Csrnp3mmu-miR-  | 39 | 0.000101 | m1 | Csrnp3  |
| m1-Csrnp3mmu-miR-  | 23 | 0.002092 | m1 | Csrnp3  |
| m1-Csrnp3mmu-miR-  | 73 | 0.004934 | m1 | Csrnp3  |
| m1-Cst6 mmu-miR-   | 73 | 0.004934 | m1 | Cst6    |
| m1-Ctsl mmu-miR-   | 39 | 0.000101 | m1 | Ctsl    |
| m1-Ctsl mmu-miR-   | 56 | 0.001269 | m1 | Ctsl    |
| m1-Cxx1b G730013B( | 99 | 0.001128 | m1 | Cxx1b   |
| m1-Cxx1c G730013B( | 99 | 0.001128 | m1 | Cxx1c   |
| m1-Cyb5a G730013B( | 99 | 0.001128 | m1 | Cyb5a   |

|                     |    |          |    |         |
|---------------------|----|----------|----|---------|
| m1-Dapk1 mmu-miR-   | 73 | 0.004934 | m1 | Dapk1   |
| m1-Dcaf10 mmu-miR-  | 73 | 0.004934 | m1 | Dcaf10  |
| m1-Dcaf12 G730013B( | 99 | 0.001128 | m1 | Dcaf121 |
| m1-Ddx55 mmu-miR-   | 73 | 0.004934 | m1 | Ddx55   |
| m1-Decr2 mmu-miR-   | 39 | 0.000101 | m1 | Decr2   |
| m1-Dennd mmu-miR-   | 73 | 0.004934 | m1 | Dennd5b |
| m1-Dennd G730013B(  | 99 | 0.001128 | m1 | Dennd6b |
| m1-Dgkh G730013B(   | 99 | 0.001128 | m1 | Dgkh    |
| m1-Dnaja4 G730013B( | 99 | 0.001128 | m1 | Dnaja4  |
| m1-Dnajb3 G730013B( | 99 | 0.001128 | m1 | Dnajb3  |
| m1-Dnm3 mmu-miR-    | 73 | 0.004934 | m1 | Dnm3    |
| m1-Dnm3 mmu-miR-    | 6  | 0.004549 | m1 | Dnm3    |
| m1-Dpys G730013B(   | 99 | 0.001128 | m1 | Dpys    |
| m1-Dse mmu-miR-     | 73 | 0.004934 | m1 | Dse     |
| m1-Dusp3 mmu-miR-   | 39 | 0.000101 | m1 | Dusp3   |
| m1-E2f1 mmu-miR-    | 45 | 0.004529 | m1 | E2f1    |
| m1-E2f1 mmu-miR-    | 23 | 0.002092 | m1 | E2f1    |
| m1-E2f1 4930461G1   | 5  | 0.000342 | m1 | E2f1    |
| m1-E2f1 mmu-miR-    | 20 | 0.003938 | m1 | E2f1    |
| m1-E2f1 mmu-miR-    | 5  | 0.005065 | m1 | E2f1    |
| m1-E2f1 mmu-miR-    | 73 | 0.004934 | m1 | E2f1    |
| m1-E2f1 mmu-mir-    | 3  | 0.005539 | m1 | E2f1    |
| m1-E2f1 473141910(  | 5  | 0.000826 | m1 | E2f1    |
| m1-E2f1 mmu-miR-    | 6  | 0.004549 | m1 | E2f1    |
| m1-E2f1 4930547M.   | 4  | 0.004564 | m1 | E2f1    |
| m1-E2f1 Gm9793      | 5  | 0.007869 | m1 | E2f1    |
| m1-E2f1 mmu-mir-    | 4  | 0.008301 | m1 | E2f1    |
| m1-E2f1 9330151L1   | 4  | 0.008301 | m1 | E2f1    |
| m1-E2f1 Snord49b    | 6  | 0.004549 | m1 | E2f1    |
| m1-E2f1 Snord1c     | 5  | 0.007869 | m1 | E2f1    |
| m1-E2f1 mmu-miR-    | 5  | 0.007869 | m1 | E2f1    |
| m1-E2f1 G730013B(   | 99 | 0.001128 | m1 | E2f1    |
| m1-E2f3 G730013B(   | 99 | 0.001128 | m1 | E2f3    |
| m1-E2f3 mmu-miR-    | 36 | 0.00136  | m1 | E2f3    |
| m1-E2f3 mmu-miR-    | 39 | 0.000101 | m1 | E2f3    |
| m1-Echs1 G730013B(  | 99 | 0.001128 | m1 | Echs1   |
| m1-Ednrb mmu-miR-   | 73 | 0.004934 | m1 | Ednrb   |
| m1-Ehhadh mmu-miR-  | 73 | 0.004934 | m1 | Ehhadh  |
| m1-Eif1b mmu-miR-   | 36 | 0.00136  | m1 | Eif1b   |
| m1-Eif2ak2 mmu-miR- | 6  | 0.004549 | m1 | Eif2ak2 |
| m1-Elk4 mmu-miR-    | 36 | 0.00136  | m1 | Elk4    |
| m1-Elmo2 mmu-miR-   | 39 | 0.000101 | m1 | Elmo2   |
| m1-Epdr1 mmu-miR-   | 36 | 0.00136  | m1 | Epdr1   |
| m1-Epha7 G730013B(  | 99 | 0.001128 | m1 | Epha7   |
| m1-Ephb3 mmu-miR-   | 23 | 0.002092 | m1 | Ephb3   |
| m1-Ephb3 mmu-miR-   | 20 | 0.003938 | m1 | Ephb3   |
| m1-Eri1 mmu-miR-    | 36 | 0.00136  | m1 | Eri1    |
| m1-Ero1l G730013B(  | 99 | 0.001128 | m1 | Ero1l   |

|           |            |    |          |    |         |
|-----------|------------|----|----------|----|---------|
| m1-Esrrb  | 4731419109 | 5  | 0.000826 | m1 | Esrrb   |
| m1-Esrrb  | Snord49b   | 6  | 0.004549 | m1 | Esrrb   |
| m1-Esrrb  | 4930461G1  | 5  | 0.000342 | m1 | Esrrb   |
| m1-Esrrb  | mmu-mir-   | 3  | 0.005539 | m1 | Esrrb   |
| m1-Esrrb  | mmu-mir-   | 4  | 0.008301 | m1 | Esrrb   |
| m1-Esrrb  | mmu-miR-   | 6  | 0.004549 | m1 | Esrrb   |
| m1-Esrrb  | Gm9793     | 5  | 0.007869 | m1 | Esrrb   |
| m1-Esrrb  | Gm12866    | 4  | 0.008301 | m1 | Esrrb   |
| m1-Esrrb  | mmu-miR-   | 5  | 0.007869 | m1 | Esrrb   |
| m1-Esrrb  | Snord1c    | 5  | 0.007869 | m1 | Esrrb   |
| m1-Evi2b  | mmu-miR-   | 73 | 0.004934 | m1 | Evi2b   |
| m1-Exoc3l | G730013B(  | 99 | 0.001128 | m1 | Exoc3l2 |
| m1-Fam12  | mmu-miR-   | 45 | 0.004529 | m1 | Fam120a |
| m1-Fam12  | mmu-miR-   | 36 | 0.00136  | m1 | Fam120a |
| m1-Fam12  | mmu-miR-   | 73 | 0.004934 | m1 | Fam120a |
| m1-Fam12  | mmu-miR-   | 56 | 0.001269 | m1 | Fam120a |
| m1-Fam17  | mmu-miR-   | 36 | 0.00136  | m1 | Fam174a |
| m1-Fam49  | mmu-miR-   | 73 | 0.004934 | m1 | Fam49b  |
| m1-Fam53  | mmu-miR-   | 73 | 0.004934 | m1 | Fam53c  |
| m1-Fam63  | mmu-miR-   | 73 | 0.004934 | m1 | Fam63b  |
| m1-Fam63  | mmu-miR-   | 23 | 0.002092 | m1 | Fam63b  |
| m1-Fbn1   | G730013B(  | 99 | 0.001128 | m1 | Fbn1    |
| m1-Fbxl14 | mmu-miR-   | 20 | 0.003938 | m1 | Fbxl14  |
| m1-Fbxl14 | mmu-miR-   | 73 | 0.004934 | m1 | Fbxl14  |
| m1-Fbxl14 | mmu-miR-   | 23 | 0.002092 | m1 | Fbxl14  |
| m1-Fbxo3  | (mmu-miR-  | 39 | 0.000101 | m1 | Fbxo30  |
| m1-Fermt2 | mmu-miR-   | 36 | 0.00136  | m1 | Fermt2  |
| m1-Fibin  | G730013B(  | 99 | 0.001128 | m1 | Fibin   |
| m1-Firre  | G730013B(  | 99 | 0.001128 | m1 | Firre   |
| m1-Flcn   | mmu-miR-   | 56 | 0.001269 | m1 | Flcn    |
| m1-Flnb   | mmu-miR-   | 36 | 0.00136  | m1 | Flnb    |
| m1-Flrt2  | G730013B(  | 99 | 0.001128 | m1 | Flrt2   |
| m1-Fmr1   | mmu-miR-   | 45 | 0.009514 | m1 | Fmr1    |
| m1-Fmr1   | mmu-miR-   | 56 | 0.001269 | m1 | Fmr1    |
| m1-Fmr1   | mmu-miR-   | 36 | 0.00136  | m1 | Fmr1    |
| m1-Fosl2  | mmu-miR-   | 45 | 0.009514 | m1 | Fosl2   |
| m1-Fosl2  | mmu-miR-   | 56 | 0.001269 | m1 | Fosl2   |
| m1-Foxa2  | Gm9793     | 5  | 0.007869 | m1 | Foxa2   |
| m1-Foxa2  | Snord49b   | 6  | 0.004549 | m1 | Foxa2   |
| m1-Foxa2  | 9330151L1  | 4  | 0.008301 | m1 | Foxa2   |
| m1-Gclm   | G730013B(  | 99 | 0.001128 | m1 | Gclm    |
| m1-Gfpt2  | mmu-miR-   | 45 | 0.004529 | m1 | Gfpt2   |
| m1-Gfpt2  | mmu-miR-   | 56 | 0.001269 | m1 | Gfpt2   |
| m1-Gls    | mmu-miR-   | 39 | 0.000101 | m1 | Gls     |
| m1-Glyr1  | mmu-miR-   | 45 | 0.009514 | m1 | Glyr1   |
| m1-Glyr1  | mmu-miR-   | 56 | 0.001269 | m1 | Glyr1   |
| m1-Gnb4   | G730013B(  | 99 | 0.001128 | m1 | Gnb4    |
| m1-Gnb4   | mmu-miR-   | 73 | 0.004934 | m1 | Gnb4    |

|                     |    |          |    |         |
|---------------------|----|----------|----|---------|
| m1-Gpc4 mmu-miR-    | 6  | 0.004549 | m1 | Gpc4    |
| m1-Gpr16(G730013B(  | 99 | 0.001128 | m1 | Gpr160  |
| m1-Gpr17·mmu-miR-   | 39 | 0.000101 | m1 | Gpr174  |
| m1-Gria1 mmu-miR-   | 56 | 0.001269 | m1 | Gria1   |
| m1-Gsn G730013B(    | 99 | 0.001128 | m1 | Gsn     |
| m1-Gtf2a1 mmu-miR-  | 45 | 0.004529 | m1 | Gtf2a1  |
| m1-Gtf2a2 G730013B( | 99 | 0.001128 | m1 | Gtf2a2  |
| m1-H19 G730013B(    | 99 | 0.001128 | m1 | H19     |
| m1-Has2 G730013B(   | 99 | 0.001128 | m1 | Has2    |
| m1-Haus2 mmu-miR-   | 23 | 0.002092 | m1 | Haus2   |
| m1-Hcfc2 G730013B(  | 99 | 0.001128 | m1 | Hcfc2   |
| m1-Hecw1 mmu-miR-   | 20 | 0.003938 | m1 | Hecw1   |
| m1-Hexim G730013B(  | 99 | 0.001128 | m1 | Hexim1  |
| m1-Hnrnp·mmu-miR-   | 56 | 0.001269 | m1 | Hnrnpa0 |
| m1-Hnrnp·mmu-miR-   | 45 | 0.004529 | m1 | Hnrnpa0 |
| m1-Hnrnp·mmu-miR-   | 36 | 0.00136  | m1 | Hnrnpa0 |
| m1-Hnrnp·mmu-miR-   | 45 | 0.009514 | m1 | Hnrnpa0 |
| m1-Hoxd1 mmu-miR-   | 39 | 0.000101 | m1 | Hoxd10  |
| m1-Hsd3b G730013B(  | 99 | 0.001128 | m1 | Hsd3b7  |
| m1-Hspa4l mmu-miR-  | 56 | 0.001269 | m1 | Hspa4l  |
| m1-Hspa4l mmu-miR-  | 45 | 0.009514 | m1 | Hspa4l  |
| m1-lba57 G730013B(  | 99 | 0.001128 | m1 | lba57   |
| m1-ldh3a mmu-miR-   | 39 | 0.000101 | m1 | ldh3a   |
| m1-lgf2r G730013B(  | 99 | 0.001128 | m1 | lgf2r   |
| m1-ll1rl1 mmu-miR-  | 39 | 0.000101 | m1 | ll1rl1  |
| m1-ll1rn G730013B(  | 99 | 0.001128 | m1 | ll1rn   |
| m1-lnts8 mmu-miR-   | 73 | 0.004934 | m1 | lnts8   |
| m1-lrak2 mmu-miR-   | 39 | 0.000101 | m1 | lrak2   |
| m1-lrx2 mmu-miR-    | 6  | 0.004549 | m1 | lrx2    |
| m1-Kat2b mmu-miR-   | 45 | 0.004529 | m1 | Kat2b   |
| m1-Kat2b mmu-miR-   | 56 | 0.001269 | m1 | Kat2b   |
| m1-Kctd12 G730013B( | 99 | 0.001128 | m1 | Kctd12  |
| m1-Kif4 G730013B(   | 99 | 0.001128 | m1 | Kif4    |
| m1-Kifap3 mmu-miR-  | 56 | 0.001269 | m1 | Kifap3  |
| m1-Kifap3 mmu-miR-  | 45 | 0.004529 | m1 | Kifap3  |
| m1-Kifap3 mmu-miR-  | 45 | 0.009514 | m1 | Kifap3  |
| m1-Klk8 mmu-miR-    | 73 | 0.004934 | m1 | Klk8    |
| m1-Krba1 G730013B(  | 99 | 0.001128 | m1 | Krba1   |
| m1-Lats1 mmu-miR-   | 45 | 0.004529 | m1 | Lats1   |
| m1-Lats1 mmu-miR-   | 39 | 0.000101 | m1 | Lats1   |
| m1-Lats1 mmu-miR-   | 45 | 0.009514 | m1 | Lats1   |
| m1-Lats1 mmu-miR-   | 56 | 0.001269 | m1 | Lats1   |
| m1-Ldha mmu-miR-    | 56 | 0.001269 | m1 | Ldha    |
| m1-Ldha mmu-miR-    | 45 | 0.009514 | m1 | Ldha    |
| m1-Ldha mmu-miR-    | 45 | 0.004529 | m1 | Ldha    |
| m1-Lin54 mmu-miR-   | 45 | 0.009514 | m1 | Lin54   |
| m1-Lin54 mmu-miR-   | 45 | 0.004529 | m1 | Lin54   |
| m1-Lmo2 Snord1c     | 5  | 0.007869 | m1 | Lmo2    |

|                      |    |          |    |          |
|----------------------|----|----------|----|----------|
| m1-Lpin3 G730013B(   | 99 | 0.001128 | m1 | Lpin3    |
| m1-Ly6a mmu-miR-     | 56 | 0.001269 | m1 | Ly6a     |
| m1-Lyrm9 mmu-miR-    | 39 | 0.000101 | m1 | Lyrm9    |
| m1-Map3k mmu-miR-    | 73 | 0.004934 | m1 | Map3k8   |
| m1-Map4k mmu-miR-    | 73 | 0.004934 | m1 | Map4k4   |
| m1-Mast3 mmu-miR-    | 73 | 0.004934 | m1 | Mast3    |
| m1-Med10 mmu-miR-    | 36 | 0.00136  | m1 | Med10    |
| m1-Megf9 mmu-miR-    | 56 | 0.001269 | m1 | Megf9    |
| m1-Meox2 G730013B(   | 99 | 0.001128 | m1 | Meox2    |
| m1-Mgll mmu-miR-     | 56 | 0.001269 | m1 | Mgll     |
| m1-Micu2 mmu-miR-    | 45 | 0.009514 | m1 | Micu2    |
| m1-Micu2 mmu-miR-    | 45 | 0.004529 | m1 | Micu2    |
| m1-Mknk2 G730013B(   | 99 | 0.001128 | m1 | Mknk2    |
| m1-Mkrn2 mmu-miR-    | 20 | 0.003938 | m1 | Mkrn2os  |
| m1-Mkrn2 mmu-miR-    | 23 | 0.002092 | m1 | Mkrn2os  |
| m1-Mkx G730013B(     | 99 | 0.001128 | m1 | Mkx      |
| m1-Mkx mmu-miR-      | 73 | 0.004934 | m1 | Mkx      |
| m1-Mphos8 G730013B(  | 99 | 0.001128 | m1 | Mphosph8 |
| m1-Mpp1 mmu-miR-     | 45 | 0.004529 | m1 | Mpp1     |
| m1-Mpp1 mmu-miR-     | 45 | 0.009514 | m1 | Mpp1     |
| m1-Mpp1 mmu-miR-     | 56 | 0.001269 | m1 | Mpp1     |
| m1-Mthfd1l G730013B( | 99 | 0.001128 | m1 | Mthfd1l  |
| m1-Naa38 mmu-miR-    | 73 | 0.004934 | m1 | Naa38    |
| m1-Naa38 mmu-miR-    | 45 | 0.009514 | m1 | Naa38    |
| m1-Naa50 mmu-miR-    | 56 | 0.001269 | m1 | Naa50    |
| m1-Nabp1 mmu-miR-    | 36 | 0.00136  | m1 | Nabp1    |
| m1-Ncam2 mmu-miR-    | 45 | 0.004529 | m1 | Ncam2    |
| m1-Ncam2 mmu-miR-    | 56 | 0.001269 | m1 | Ncam2    |
| m1-Ncam2 mmu-miR-    | 45 | 0.009514 | m1 | Ncam2    |
| m1-Ncan mmu-miR-     | 39 | 0.000101 | m1 | Ncan     |
| m1-Ncan mmu-miR-     | 73 | 0.004934 | m1 | Ncan     |
| m1-Nck2 mmu-miR-     | 39 | 0.000101 | m1 | Nck2     |
| m1-Ncln G730013B(    | 99 | 0.001128 | m1 | Ncln     |
| m1-Ncs1 G730013B(    | 99 | 0.001128 | m1 | Ncs1     |
| m1-Nfkb1 mmu-miR-    | 56 | 0.001269 | m1 | Nfkb1    |
| m1-Nhsl1 mmu-miR-    | 73 | 0.004934 | m1 | Nhsl1    |
| m1-Nln mmu-miR-      | 23 | 0.002092 | m1 | Nln      |
| m1-Nln mmu-miR-      | 20 | 0.003938 | m1 | Nln      |
| m1-Nop16 G730013B(   | 99 | 0.001128 | m1 | Nop16    |
| m1-Nptn mmu-miR-     | 45 | 0.009514 | m1 | Nptn     |
| m1-Nr4a1 mmu-miR-    | 73 | 0.004934 | m1 | Nr4a1    |
| m1-Nucks1 mmu-miR-   | 36 | 0.00136  | m1 | Nucks1   |
| m1-Nucks1 mmu-miR-   | 56 | 0.001269 | m1 | Nucks1   |
| m1-Nucks1 mmu-miR-   | 45 | 0.009514 | m1 | Nucks1   |
| m1-Nusap1 G730013B(  | 99 | 0.001128 | m1 | Nusap1   |
| m1-Nusap1 mmu-miR-   | 56 | 0.001269 | m1 | Nusap1   |
| m1-Ogt mmu-miR-      | 45 | 0.009514 | m1 | Ogt      |
| m1-Olfml2 G730013B(  | 99 | 0.001128 | m1 | Olfml2b  |

|                      |    |          |    |          |
|----------------------|----|----------|----|----------|
| m1-Osbpl8mmu-miR-    | 45 | 0.009514 | m1 | Osbpl8   |
| m1-Osbpl8mmu-miR-    | 45 | 0.004529 | m1 | Osbpl8   |
| m1-Osbpl8mmu-miR-    | 56 | 0.001269 | m1 | Osbpl8   |
| m1-Osbpl8mmu-miR-    | 36 | 0.00136  | m1 | Osbpl8   |
| m1-Ostf1 mmu-miR-    | 39 | 0.000101 | m1 | Ostf1    |
| m1-P2ry2 mmu-miR-    | 73 | 0.004934 | m1 | P2ry2    |
| m1-Pafah1mmu-miR-    | 36 | 0.00136  | m1 | Pafah1b1 |
| m1-Pafah1mmu-miR-    | 56 | 0.001269 | m1 | Pafah1b1 |
| m1-Papd7 mmu-miR-    | 45 | 0.009514 | m1 | Papd7    |
| m1-Pbld2 mmu-miR-    | 73 | 0.004934 | m1 | Pbld2    |
| m1-Pcdha12mmu-miR-   | 73 | 0.004934 | m1 | Pcdha12  |
| m1-Pcdha6mmu-miR-    | 73 | 0.004934 | m1 | Pcdha6   |
| m1-Pcmtd mmu-miR-    | 45 | 0.009514 | m1 | Pcmtd1   |
| m1-Pcmtd mmu-miR-    | 56 | 0.001269 | m1 | Pcmtd1   |
| m1-Pcp4l1 G730013B(  | 99 | 0.001128 | m1 | Pcp4l1   |
| m1-Perp G730013B(    | 99 | 0.001128 | m1 | Perp     |
| m1-Pfkfb1 G730013B(  | 99 | 0.001128 | m1 | Pfkfb1   |
| m1-Pigyl G730013B(   | 99 | 0.001128 | m1 | Pigyl    |
| m1-Pigyl mmu-miR-    | 73 | 0.004934 | m1 | Pigyl    |
| m1-Pitpnr mmu-miR-   | 36 | 0.00136  | m1 | Pitpnr2  |
| m1-Pitpnr mmu-miR-   | 56 | 0.001269 | m1 | Pitpnr2  |
| m1-Pitpnr mmu-miR-   | 45 | 0.004529 | m1 | Pitpnr2  |
| m1-Pitpnr mmu-miR-   | 45 | 0.009514 | m1 | Pitpnr2  |
| m1-Plag1 mmu-miR-    | 23 | 0.002092 | m1 | Plag1    |
| m1-Platr26 G730013B( | 99 | 0.001128 | m1 | Platr26  |
| m1-Pls3 G730013B(    | 99 | 0.001128 | m1 | Pls3     |
| m1-Plxna2 G730013B(  | 99 | 0.001128 | m1 | Plxna2   |
| m1-Pold3 G730013B(   | 99 | 0.001128 | m1 | Pold3    |
| m1-Polr3g mmu-miR-   | 56 | 0.001269 | m1 | Polr3g   |
| m1-Ppbbp G730013B(   | 99 | 0.001128 | m1 | Ppbbp    |
| m1-Pptc7 mmu-miR-    | 73 | 0.004934 | m1 | Pptc7    |
| m1-Prc1 mmu-miR-     | 56 | 0.001269 | m1 | Prc1     |
| m1-Prc1 mmu-miR-     | 45 | 0.004529 | m1 | Prc1     |
| m1-Prdx1 mmu-miR-    | 39 | 0.000101 | m1 | Prdx1    |
| m1-Prkacb mmu-miR-   | 73 | 0.004934 | m1 | Prkacb   |
| m1-Prkca mmu-miR-    | 20 | 0.003938 | m1 | Prkca    |
| m1-Prkca mmu-miR-    | 23 | 0.002092 | m1 | Prkca    |
| m1-Prmt8 mmu-miR-    | 73 | 0.004934 | m1 | Prmt8    |
| m1-Prrg4 mmu-miR-    | 73 | 0.004934 | m1 | Prrg4    |
| m1-Psip1 mmu-miR-    | 73 | 0.004934 | m1 | Psip1    |
| m1-Psph G730013B(    | 99 | 0.001128 | m1 | Psph     |
| m1-Ptcra mmu-miR-    | 73 | 0.004934 | m1 | Ptcra    |
| m1-Ptges G730013B(   | 99 | 0.001128 | m1 | Ptges    |
| m1-Ptgfrn mmu-miR-   | 73 | 0.004934 | m1 | Ptgfrn   |
| m1-Ptgs2 G730013B(   | 99 | 0.001128 | m1 | Ptgs2    |
| m1-Ptprc mmu-miR-    | 36 | 0.00136  | m1 | Ptprc    |
| m1-Ptprc mmu-miR-    | 39 | 0.000101 | m1 | Ptprc    |
| m1-Pxmp2 G730013B(   | 99 | 0.001128 | m1 | Pxmp2    |

|                     |    |          |    |          |
|---------------------|----|----------|----|----------|
| m1-Pxmp4G730013B(   | 99 | 0.001128 | m1 | Pxmp4    |
| m1-PycardG730013B(  | 99 | 0.001128 | m1 | Pycard   |
| m1-Rab9b mmu-miR-   | 56 | 0.001269 | m1 | Rab9b    |
| m1-Rac3 G730013B(   | 99 | 0.001128 | m1 | Rac3     |
| m1-Rap1g mmu-miR-   | 36 | 0.00136  | m1 | Rap1gds1 |
| m1-Rapge mmu-miR-   | 45 | 0.004529 | m1 | Rapgef6  |
| m1-Rapge mmu-miR-   | 45 | 0.009514 | m1 | Rapgef6  |
| m1-Rbbp5 mmu-miR-   | 45 | 0.004529 | m1 | Rbbp5    |
| m1-Rbbp5 Snord1c    | 5  | 0.007869 | m1 | Rbbp5    |
| m1-Rbbp5 Gm9793     | 5  | 0.007869 | m1 | Rbbp5    |
| m1-Rbbp5 Gm12866    | 4  | 0.008301 | m1 | Rbbp5    |
| m1-Rbbp5 mmu-miR-   | 20 | 0.003938 | m1 | Rbbp5    |
| m1-Rbbp5 mmu-miR-   | 23 | 0.002092 | m1 | Rbbp5    |
| m1-Rbbp5 mmu-miR-   | 5  | 0.005065 | m1 | Rbbp5    |
| m1-Rbbp5 4930547M.  | 4  | 0.004564 | m1 | Rbbp5    |
| m1-Rbbp5 Snord49b   | 6  | 0.004549 | m1 | Rbbp5    |
| m1-Rbbp5 473141910( | 5  | 0.000826 | m1 | Rbbp5    |
| m1-Rbbp5 mmu-miR-   | 6  | 0.004549 | m1 | Rbbp5    |
| m1-Rbbp5 mmu-mir-   | 3  | 0.005539 | m1 | Rbbp5    |
| m1-Rbbp5 mmu-mir-   | 4  | 0.008301 | m1 | Rbbp5    |
| m1-Rbbp5 9330151L1  | 4  | 0.008301 | m1 | Rbbp5    |
| m1-Rbbp5 mmu-miR-   | 5  | 0.007869 | m1 | Rbbp5    |
| m1-Rbbp5 4930461G1  | 5  | 0.000342 | m1 | Rbbp5    |
| m1-Rbm27 mmu-miR-   | 45 | 0.009514 | m1 | Rbm27    |
| m1-Rbm27 mmu-miR-   | 45 | 0.004529 | m1 | Rbm27    |
| m1-Rbm8ε mmu-miR-   | 39 | 0.000101 | m1 | Rbm8a    |
| m1-Rgs16 G730013B(  | 99 | 0.001128 | m1 | Rgs16    |
| m1-Rnf11 mmu-miR-   | 45 | 0.004529 | m1 | Rnf11    |
| m1-Rnf38 mmu-miR-   | 45 | 0.004529 | m1 | Rnf38    |
| m1-Rnf38 mmu-miR-   | 36 | 0.00136  | m1 | Rnf38    |
| m1-Rnf38 mmu-miR-   | 73 | 0.004934 | m1 | Rnf38    |
| m1-Rnf38 mmu-miR-   | 45 | 0.009514 | m1 | Rnf38    |
| m1-Rnmt mmu-miR-    | 73 | 0.004934 | m1 | Rnmt     |
| m1-Safb G730013B(   | 99 | 0.001128 | m1 | Safb     |
| m1-Samd4 mmu-miR-   | 5  | 0.005065 | m1 | Samd4    |
| m1-Samd9 G730013B(  | 99 | 0.001128 | m1 | Samd9l   |
| m1-Sash3 mmu-miR-   | 56 | 0.001269 | m1 | Sash3    |
| m1-Scarb1 G730013B( | 99 | 0.001128 | m1 | Scarb1   |
| m1-Scg2 mmu-miR-    | 36 | 0.00136  | m1 | Scg2     |
| m1-Sdhaf3 mmu-miR-  | 36 | 0.00136  | m1 | Sdhaf3   |
| m1-Sec24ε mmu-miR-  | 56 | 0.001269 | m1 | Sec24a   |
| m1-Sec24ε mmu-miR-  | 36 | 0.00136  | m1 | Sec24a   |
| m1-Sec24ϵ mmu-miR-  | 45 | 0.009514 | m1 | Sec24c   |
| m1-Sec24ϵ mmu-miR-  | 56 | 0.001269 | m1 | Sec24c   |
| m1-Sema3 G730013B(  | 99 | 0.001128 | m1 | Sema3f   |
| m1-Sephs1 mmu-miR-  | 36 | 0.00136  | m1 | Sephs1   |
| m1-Sepw1 G730013B(  | 99 | 0.001128 | m1 | Sepw1    |
| m1-Serinc1 mmu-miR- | 45 | 0.004529 | m1 | Serinc5  |



|                     |    |          |    |          |
|---------------------|----|----------|----|----------|
| m1-Sh3gl3mmu-miR-   | 73 | 0.004934 | m1 | Sh3gl3   |
| m1-Slc12a mmu-miR-  | 73 | 0.004934 | m1 | Slc12a2  |
| m1-Slc12a mmu-miR-  | 45 | 0.004529 | m1 | Slc12a2  |
| m1-Slc1a7 mmu-miR-  | 20 | 0.003938 | m1 | Slc1a7   |
| m1-Slc1a7 mmu-miR-  | 23 | 0.002092 | m1 | Slc1a7   |
| m1-Slc22a mmu-miR-  | 20 | 0.003938 | m1 | Slc22a15 |
| m1-Slc43a mmu-miR-  | 73 | 0.004934 | m1 | Slc43a2  |
| m1-Slc5a3 mmu-miR-  | 45 | 0.009514 | m1 | Slc5a3   |
| m1-Slc7a5 mmu-miR-  | 36 | 0.00136  | m1 | Slc7a5   |
| m1-Slfn2 G730013B(  | 99 | 0.001128 | m1 | Slfn2    |
| m1-Smad7mmu-miR-    | 73 | 0.004934 | m1 | Smad7    |
| m1-Smad7mmu-miR-    | 56 | 0.001269 | m1 | Smad7    |
| m1-Smap1mmu-miR-    | 39 | 0.000101 | m1 | Smap1    |
| m1-Smap1mmu-miR-    | 45 | 0.009514 | m1 | Smap1    |
| m1-Smg1 mmu-miR-    | 45 | 0.009514 | m1 | Smg1     |
| m1-Smim8G730013B(   | 99 | 0.001128 | m1 | Smim8    |
| m1-Snap29mmu-miR-   | 56 | 0.001269 | m1 | Snap29   |
| m1-Snap29mmu-miR-   | 45 | 0.004529 | m1 | Snap29   |
| m1-Snx2 mmu-miR-    | 56 | 0.001269 | m1 | Snx2     |
| m1-Snx2 mmu-miR-    | 45 | 0.004529 | m1 | Snx2     |
| m1-Sox2 4930461G1   | 5  | 0.000342 | m1 | Sox2     |
| m1-Sox2 G730013B(   | 99 | 0.001128 | m1 | Sox2     |
| m1-Sox2 473141910(  | 5  | 0.000826 | m1 | Sox2     |
| m1-Sox2 mmu-miR-    | 45 | 0.004529 | m1 | Sox2     |
| m1-Sparc G730013B(  | 99 | 0.001128 | m1 | Sparc    |
| m1-Spib mmu-miR-    | 39 | 0.000101 | m1 | Spib     |
| m1-Sptssa mmu-miR-  | 39 | 0.000101 | m1 | Sptssa   |
| m1-Srpk2 mmu-miR-   | 45 | 0.004529 | m1 | Srpk2    |
| m1-Srpk2 mmu-miR-   | 56 | 0.001269 | m1 | Srpk2    |
| m1-Strbp mmu-miR-   | 20 | 0.003938 | m1 | Strbp    |
| m1-Sycp3 G730013B(  | 99 | 0.001128 | m1 | Sycp3    |
| m1-Syngri3mmu-miR-  | 36 | 0.00136  | m1 | Syngri3  |
| m1-Synj1 mmu-miR-   | 56 | 0.001269 | m1 | Synj1    |
| m1-Synj1 mmu-miR-   | 45 | 0.004529 | m1 | Synj1    |
| m1-Tacr2 mmu-miR-   | 20 | 0.003938 | m1 | Tacr2    |
| m1-Tacr2 mmu-miR-   | 23 | 0.002092 | m1 | Tacr2    |
| m1-Tbc1d22bmmu-miR- | 73 | 0.004934 | m1 | Tbc1d22b |
| m1-Tbl1xr1mmu-miR-  | 39 | 0.000101 | m1 | Tbl1xr1  |
| m1-Tbl1xr1mmu-miR-  | 36 | 0.00136  | m1 | Tbl1xr1  |
| m1-Tbl1xr1mmu-miR-  | 45 | 0.004529 | m1 | Tbl1xr1  |
| m1-Tbl1xr1mmu-miR-  | 73 | 0.004934 | m1 | Tbl1xr1  |
| m1-Tbl1xr1mmu-miR-  | 45 | 0.009514 | m1 | Tbl1xr1  |
| m1-Tbl1xr1mmu-miR-  | 56 | 0.001269 | m1 | Tbl1xr1  |
| m1-Tet2 mmu-miR-    | 45 | 0.009514 | m1 | Tet2     |
| m1-Tet2 mmu-miR-    | 45 | 0.004529 | m1 | Tet2     |
| m1-Tet2 mmu-miR-    | 39 | 0.000101 | m1 | Tet2     |
| m1-Tet3 G730013B(   | 99 | 0.001128 | m1 | Tet3     |
| m1-Tet3 mmu-miR-    | 73 | 0.004934 | m1 | Tet3     |

|                     |    |          |    |           |
|---------------------|----|----------|----|-----------|
| m1-Tmem mmu-miR-    | 23 | 0.002092 | m1 | Tmem167   |
| m1-Tmem mmu-miR-    | 39 | 0.000101 | m1 | Tmem263   |
| m1-Tnfrsf1 mmu-miR- | 39 | 0.000101 | m1 | Tnfrsf10b |
| m1-Tnfrsf1 mmu-miR- | 6  | 0.004549 | m1 | Tnfrsf10b |
| m1-Tnfrsf1 mmu-miR- | 45 | 0.009514 | m1 | Tnfrsf1a  |
| m1-Tnfsf1 mmu-miR-  | 56 | 0.001269 | m1 | Tnfsf11   |
| m1-Tnfsf1 G730013B  | 99 | 0.001128 | m1 | Tnfsf11   |
| m1-Tnfsf1 mmu-miR-  | 45 | 0.009514 | m1 | Tnfsf11   |
| m1-Topbp G730013B   | 99 | 0.001128 | m1 | Topbp1    |
| m1-Tpm4 mmu-miR-    | 36 | 0.00136  | m1 | Tpm4      |
| m1-Trim9 mmu-miR-   | 36 | 0.00136  | m1 | Trim9     |
| m1-Trmt1 G730013B   | 99 | 0.001128 | m1 | Trmt10a   |
| m1-Trmt1 mmu-miR-   | 39 | 0.000101 | m1 | Trmt10a   |
| m1-Trps1 mmu-miR-   | 36 | 0.00136  | m1 | Trps1     |
| m1-Ttc14 mmu-miR-   | 56 | 0.001269 | m1 | Ttc14     |
| m1-Ttc7 mmu-miR-    | 6  | 0.004549 | m1 | Ttc7      |
| m1-Ttc7 mmu-miR-    | 23 | 0.002092 | m1 | Ttc7      |
| m1-Ttc7 mmu-miR-    | 20 | 0.003938 | m1 | Ttc7      |
| m1-Tube1 mmu-miR-   | 39 | 0.000101 | m1 | Tube1     |
| m1-Tube1 G730013B   | 99 | 0.001128 | m1 | Tube1     |
| m1-Ubash mmu-miR-   | 45 | 0.009514 | m1 | Ubash3b   |
| m1-Ubash mmu-miR-   | 45 | 0.004529 | m1 | Ubash3b   |
| m1-Ube2d mmu-miR-   | 45 | 0.009514 | m1 | Ube2d1    |
| m1-Ube2d mmu-miR-   | 56 | 0.001269 | m1 | Ube2d1    |
| m1-Ube2j2 mmu-miR-  | 39 | 0.000101 | m1 | Ube2j2    |
| m1-Ugp2 mmu-miR-    | 45 | 0.004529 | m1 | Ugp2      |
| m1-Ugp2 mmu-miR-    | 45 | 0.009514 | m1 | Ugp2      |
| m1-Ulk3 mmu-miR-    | 73 | 0.004934 | m1 | Ulk3      |
| m1-Unc5c mmu-miR-   | 23 | 0.002092 | m1 | Unc5c     |
| m1-Usp14 mmu-miR-   | 45 | 0.009514 | m1 | Usp14     |
| m1-Usp14 mmu-miR-   | 45 | 0.004529 | m1 | Usp14     |
| m1-Usp14 mmu-miR-   | 56 | 0.001269 | m1 | Usp14     |
| m1-Usp8 mmu-miR-    | 39 | 0.000101 | m1 | Usp8      |
| m1-Vezf1 mmu-miR-   | 36 | 0.00136  | m1 | Vezf1     |
| m1-Vgll4 G730013B   | 99 | 0.001128 | m1 | Vgll4     |
| m1-Vps29 mmu-miR-   | 36 | 0.00136  | m1 | Vps29     |
| m1-Wdr13 mmu-miR-   | 45 | 0.009514 | m1 | Wdr13     |
| m1-Wdr5 9330151L1   | 4  | 0.008301 | m1 | Wdr5      |
| m1-Wdr5 mmu-miR-    | 4  | 0.008301 | m1 | Wdr5      |
| m1-Wdr5 mmu-miR-    | 5  | 0.005065 | m1 | Wdr5      |
| m1-Wdr5 mmu-miR-    | 6  | 0.004549 | m1 | Wdr5      |
| m1-Wdr5 mmu-miR-    | 5  | 0.007869 | m1 | Wdr5      |
| m1-Wdr5 4930461G1   | 5  | 0.000342 | m1 | Wdr5      |
| m1-Wdr5 Gm12866     | 4  | 0.008301 | m1 | Wdr5      |
| m1-Wdr5 4930547M    | 4  | 0.004564 | m1 | Wdr5      |
| m1-Wdr5 Snord49b    | 6  | 0.004549 | m1 | Wdr5      |
| m1-Wdr5 Gm9793      | 5  | 0.007869 | m1 | Wdr5      |
| m1-Wfdc1 mmu-miR-   | 23 | 0.002092 | m1 | Wfdc12    |

|                     |    |          |    |               |
|---------------------|----|----------|----|---------------|
| m1-Wfdc1 mmu-miR-   | 20 | 0.003938 | m1 | Wfdc12        |
| m1-Wnt10 G730013B(  | 99 | 0.001128 | m1 | Wnt10a        |
| m1-Wnt5b G730013B(  | 99 | 0.001128 | m1 | Wnt5b         |
| m1-Wnt7a mmu-miR-   | 6  | 0.004549 | m1 | Wnt7a         |
| m1-Zbtb39 mmu-miR-  | 73 | 0.004934 | m1 | Zbtb39        |
| m1-Zbtb39 mmu-miR-  | 23 | 0.002092 | m1 | Zbtb39        |
| m1-Zc3hav1 mmu-miR- | 73 | 0.004934 | m1 | Zc3hav1l      |
| m1-Zfp281 mmu-miR-  | 73 | 0.004934 | m1 | Zfp281        |
| m1-Zfp362 G730013B( | 99 | 0.001128 | m1 | Zfp362        |
| m1-Zfp446 mmu-miR-  | 23 | 0.002092 | m1 | Zfp446        |
| m1-Zfp446 mmu-miR-  | 39 | 0.000101 | m1 | Zfp446        |
| m1-Zfp446 mmu-miR-  | 20 | 0.003938 | m1 | Zfp446        |
| m1-Zfp446 mmu-miR-  | 73 | 0.004934 | m1 | Zfp446        |
| m1-Zfp597 mmu-miR-  | 45 | 0.009514 | m1 | Zfp597        |
| m1-Zfp597 mmu-miR-  | 45 | 0.004529 | m1 | Zfp597        |
| m1-Zfp597 mmu-miR-  | 56 | 0.001269 | m1 | Zfp597        |
| m1-Zfp618 mmu-miR-  | 73 | 0.004934 | m1 | Zfp618        |
| m1-Zfp655 mmu-miR-  | 73 | 0.004934 | m1 | Zfp655        |
| m1-Zfp780 mmu-miR-  | 39 | 0.000101 | m1 | Zfp780b       |
| m1-Zfx Gm12866      | 4  | 0.008301 | m1 | Zfx           |
| m1-Zfx mmu-miR-     | 5  | 0.007869 | m1 | Zfx           |
| m1-Zfx 4930547M.    | 4  | 0.004564 | m1 | Zfx           |
| m1-Zfx Snord1c      | 5  | 0.007869 | m1 | Zfx           |
| m1-Zfx 473141910(   | 5  | 0.000826 | m1 | Zfx           |
| m1-Zfx G730013B(    | 99 | 0.001128 | m1 | Zfx           |
| m1-Zfx Snord49b     | 6  | 0.004549 | m1 | Zfx           |
| m1-Zfx mmu-miR-     | 36 | 0.00136  | m1 | Zfx           |
| m1-Zfx mmu-miR-     | 73 | 0.004934 | m1 | Zfx           |
| m1-Zhx3 G730013B(   | 99 | 0.001128 | m1 | Zhx3          |
| m2-28100( mmu-miR-  | 10 | 0.008388 | m2 | 2810006K23Rik |
| m2-28100( mmu-miR-  | 11 | 0.007613 | m2 | 2810006K23Rik |
| m2-Aco1 mmu-miR-    | 11 | 0.007613 | m2 | Aco1          |
| m2-Acsl4 mmu-miR-   | 11 | 0.004085 | m2 | Acsl4         |
| m2-Acsl4 mmu-miR-   | 9  | 0.007418 | m2 | Acsl4         |
| m2-Ado mmu-miR-     | 9  | 0.009439 | m2 | Ado           |
| m2-Agrn mmu-miR-    | 4  | 0.009936 | m2 | Agrn          |
| m2-Ankrd4 mmu-miR-  | 17 | 0.002118 | m2 | Ankrd49       |
| m2-Ap2b1 mmu-miR-   | 9  | 0.007418 | m2 | Ap2b1         |
| m2-Ap2b1 mmu-miR-   | 17 | 0.002118 | m2 | Ap2b1         |
| m2-Aplp2 mmu-miR-   | 15 | 2.18E-05 | m2 | Aplp2         |
| m2-Arl15 mmu-miR-   | 15 | 2.18E-05 | m2 | Arl15         |
| m2-Arl15 mmu-miR-   | 9  | 0.009439 | m2 | Arl15         |
| m2-Asf1a mmu-miR-   | 15 | 2.18E-05 | m2 | Asf1a         |
| m2-Asf1a mmu-miR-   | 15 | 0.000748 | m2 | Asf1a         |
| m2-Atf4 mmu-miR-    | 17 | 0.002118 | m2 | Atf4          |
| m2-Atp6v1 mmu-miR-  | 12 | 0.000278 | m2 | Atp6v1h       |
| m2-Aurkb mmu-miR-   | 9  | 0.007418 | m2 | Aurkb         |
| m2-Cebpa mmu-miR-   | 11 | 0.007613 | m2 | Cebpa         |

|                      |    |          |    |          |
|----------------------|----|----------|----|----------|
| m2-Cebpa mmu-miR-    | 2  | 0.007046 | m2 | Cebpa    |
| m2-Cebpa 9330111N(   | 2  | 0.009719 | m2 | Cebpa    |
| m2-Cebpa mmu-miR-    | 15 | 2.18E-05 | m2 | Cebpa    |
| m2-Cebpa mmu-miR-    | 11 | 0.003485 | m2 | Cebpa    |
| m2-Cebpa mmu-miR-    | 9  | 0.009439 | m2 | Cebpa    |
| m2-Cebpa Gm16160     | 2  | 0.009719 | m2 | Cebpa    |
| m2-Cebpa Fam150a     | 2  | 0.002903 | m2 | Cebpa    |
| m2-Cebpa mmu-miR-    | 4  | 0.009936 | m2 | Cebpa    |
| m2-Cebpa mmu-miR-    | 2  | 0.004767 | m2 | Cebpa    |
| m2-Cebpa Gm16701     | 2  | 0.009719 | m2 | Cebpa    |
| m2-Cebpa Snord115    | 2  | 0.001473 | m2 | Cebpa    |
| m2-Cebpa 9530036O(   | 2  | 0.009719 | m2 | Cebpa    |
| m2-Cep12 mmu-miR-    | 15 | 0.000748 | m2 | Cep120   |
| m2-Chmp3 mmu-miR-    | 19 | 0.009865 | m2 | Chmp3    |
| m2-Cit mmu-miR-      | 12 | 0.000278 | m2 | Cit      |
| m2-Csmc1 mmu-miR-    | 11 | 0.004085 | m2 | Csmc1    |
| m2-Csmc1 mmu-miR-    | 2  | 0.007046 | m2 | Csmc1    |
| m2-Cybrd1 mmu-miR-   | 10 | 0.008388 | m2 | Cybrd1   |
| m2-Cybrd1 mmu-miR-   | 11 | 0.007613 | m2 | Cybrd1   |
| m2-Elavl1 Snord115   | 2  | 0.001473 | m2 | Elavl1   |
| m2-Exosc2 mmu-miR-   | 11 | 0.004085 | m2 | Exosc2   |
| m2-Fads1 mmu-miR-    | 15 | 2.18E-05 | m2 | Fads1    |
| m2-Fads1 mmu-miR-    | 11 | 0.007613 | m2 | Fads1    |
| m2-Fam13 mmu-miR-    | 15 | 0.000748 | m2 | Fam13c   |
| m2-Fam78 mmu-miR-    | 15 | 2.18E-05 | m2 | Fam78b   |
| m2-Fosb mmu-miR-     | 15 | 2.18E-05 | m2 | Fosb     |
| m2-Frk mmu-miR-      | 15 | 0.000748 | m2 | Frk      |
| m2-Frmd6 mmu-miR-    | 2  | 0.007046 | m2 | Frmd6    |
| m2-Ftsj1 mmu-miR-    | 15 | 0.000748 | m2 | Ftsj1    |
| m2-Ftsj1 mmu-miR-    | 12 | 0.000278 | m2 | Ftsj1    |
| m2-Gatsl2 mmu-miR-   | 19 | 0.009865 | m2 | Gatsl2   |
| m2-Gdpgp1 mmu-miR-   | 10 | 0.008388 | m2 | Gdpgp1   |
| m2-Glul mmu-miR-     | 15 | 2.18E-05 | m2 | Glul     |
| m2-Gmeb1 mmu-miR-    | 10 | 0.008388 | m2 | Gmeb1    |
| m2-Gmeb1 mmu-miR-    | 17 | 0.002118 | m2 | Gmeb1    |
| m2-Gmeb1 mmu-miR-    | 11 | 0.003485 | m2 | Gmeb1    |
| m2-Gmeb1 mmu-miR-    | 15 | 0.000748 | m2 | Gmeb1    |
| m2-Gmeb1 mmu-miR-    | 11 | 0.007613 | m2 | Gmeb1    |
| m2-Gpd1l mmu-miR-    | 17 | 0.002118 | m2 | Gpd1l    |
| m2-Gpd1l mmu-miR-    | 19 | 0.009865 | m2 | Gpd1l    |
| m2-Gpd1l mmu-miR-    | 9  | 0.009439 | m2 | Gpd1l    |
| m2-H3f3b mmu-miR-    | 11 | 0.003485 | m2 | H3f3b    |
| m2-H3f3b mmu-miR-    | 10 | 0.008388 | m2 | H3f3b    |
| m2-H3f3b mmu-miR-    | 19 | 0.009865 | m2 | H3f3b    |
| m2-Hmgcl mmu-miR-    | 17 | 0.002118 | m2 | Hmgcl    |
| m2-Hnrnp2b1 mmu-miR- | 12 | 0.000278 | m2 | Hnrnp2b1 |
| m2-Hnrnp2b1 mmu-miR- | 19 | 0.009865 | m2 | Hnrnp2b1 |
| m2-Hnrnp2b1 mmu-miR- | 17 | 0.002118 | m2 | Hnrnp2b1 |

|                      |    |          |    |          |
|----------------------|----|----------|----|----------|
| m2-Hnrnp mmu-miR-    | 9  | 0.007418 | m2 | Hnrnpul2 |
| m2-Hnrnp mmu-miR-    | 19 | 0.009865 | m2 | Hnrnpul2 |
| m2-Hnrnp mmu-miR-    | 11 | 0.004085 | m2 | Hnrnpul2 |
| m2-Hs3st3 mmu-miR-   | 19 | 0.009865 | m2 | Hs3st3b1 |
| m2-Id2 mmu-miR-      | 19 | 0.009865 | m2 | Id2      |
| m2-Id2 mmu-miR-      | 12 | 0.000278 | m2 | Id2      |
| m2-Kdm3a mmu-miR-    | 19 | 0.009865 | m2 | Kdm3a    |
| m2-Klh41 mmu-miR-    | 10 | 0.008388 | m2 | Klh41    |
| m2-Klh41 mmu-miR-    | 15 | 0.000748 | m2 | Klh41    |
| m2-Klh41 mmu-miR-    | 11 | 0.007613 | m2 | Klh41    |
| m2-Klh41 mmu-miR-    | 11 | 0.003485 | m2 | Klh41    |
| m2-Lats2 mmu-miR-    | 11 | 0.004085 | m2 | Lats2    |
| m2-Lfng mmu-miR-     | 9  | 0.007418 | m2 | Lfng     |
| m2-Magee1 mmu-miR-   | 19 | 0.009865 | m2 | Magee1   |
| m2-Mavs mmu-miR-     | 19 | 0.009865 | m2 | Mavs     |
| m2-Mcc mmu-miR-      | 10 | 0.008388 | m2 | Mcc      |
| m2-Mcc mmu-miR-      | 11 | 0.007613 | m2 | Mcc      |
| m2-Mcc mmu-miR-      | 11 | 0.003485 | m2 | Mcc      |
| m2-Mrfap1 mmu-miR-   | 15 | 0.000748 | m2 | Mrfap1   |
| m2-Mtfr2 mmu-miR-    | 9  | 0.009439 | m2 | Mtfr2    |
| m2-Mtfr2 mmu-miR-    | 19 | 0.009865 | m2 | Mtfr2    |
| m2-Nbr1 mmu-miR-     | 15 | 2.18E-05 | m2 | Nbr1     |
| m2-Nbr1 mmu-miR-     | 9  | 0.007418 | m2 | Nbr1     |
| m2-Nbr1 mmu-miR-     | 11 | 0.004085 | m2 | Nbr1     |
| m2-Oas3 mmu-miR-     | 19 | 0.009865 | m2 | Oas3     |
| m2-Oas3 mmu-miR-     | 9  | 0.009439 | m2 | Oas3     |
| m2-Oat mmu-miR-      | 17 | 0.002118 | m2 | Oat      |
| m2-Ooep mmu-miR-     | 10 | 0.008388 | m2 | Ooep     |
| m2-Ooep mmu-miR-     | 11 | 0.007613 | m2 | Ooep     |
| m2-Oxct1 mmu-miR-    | 12 | 0.000278 | m2 | Oxct1    |
| m2-Paqr4 mmu-miR-    | 15 | 2.18E-05 | m2 | Paqr4    |
| m2-Pcsk2 mmu-miR-    | 19 | 0.009865 | m2 | Pcsk2    |
| m2-Pfkfb2 mmu-miR-   | 17 | 0.002118 | m2 | Pfkfb2   |
| m2-Plau mmu-miR-     | 19 | 0.009865 | m2 | Plau     |
| m2-Plau mmu-miR-     | 9  | 0.009439 | m2 | Plau     |
| m2-Ppp1r14c mmu-miR- | 19 | 0.009865 | m2 | Ppp1r14c |
| m2-Prkar1a mmu-miR-  | 12 | 0.000278 | m2 | Prkar1a  |
| m2-Prkar1a mmu-miR-  | 15 | 0.000748 | m2 | Prkar1a  |
| m2-Prkar1a mmu-miR-  | 19 | 0.009865 | m2 | Prkar1a  |
| m2-Rab11a mmu-miR-   | 15 | 0.000748 | m2 | Rab11a   |
| m2-Rac2 mmu-miR-     | 11 | 0.003485 | m2 | Rac2     |
| m2-Rac2 mmu-miR-     | 11 | 0.007613 | m2 | Rac2     |
| m2-Rac2 mmu-miR-     | 15 | 0.000748 | m2 | Rac2     |
| m2-Rnf20 mmu-miR-    | 9  | 0.007418 | m2 | Rnf20    |
| m2-Rnf20 mmu-miR-    | 11 | 0.004085 | m2 | Rnf20    |
| m2-Rnf20 mmu-miR-    | 15 | 0.000748 | m2 | Rnf20    |
| m2-Rnf6 mmu-miR-     | 15 | 0.000748 | m2 | Rnf6     |
| m2-Rnf6 mmu-miR-     | 17 | 0.002118 | m2 | Rnf6     |

|                 |          |    |          |    |               |
|-----------------|----------|----|----------|----|---------------|
| m2-Sbf1         | mmu-miR- | 15 | 2.18E-05 | m2 | Sbf1          |
| m2-Sc5d         | mmu-miR- | 11 | 0.003485 | m2 | Sc5d          |
| m2-Sc5d         | mmu-miR- | 15 | 2.18E-05 | m2 | Sc5d          |
| m2-Sc5d         | mmu-miR- | 11 | 0.004085 | m2 | Sc5d          |
| m2-Sele         | mmu-miR- | 17 | 0.002118 | m2 | Sele          |
| m2-Serp1        | mmu-miR- | 11 | 0.004085 | m2 | Serp1         |
| m2-Serp1        | mmu-miR- | 10 | 0.008388 | m2 | Serp1         |
| m2-Serp1        | mmu-miR- | 9  | 0.007418 | m2 | Serp1         |
| m2-Serp1        | mmu-miR- | 11 | 0.003485 | m2 | Serp1         |
| m2-Sgpl1        | mmu-miR- | 17 | 0.002118 | m2 | Sgpl1         |
| m2-Slc27a       | mmu-miR- | 12 | 0.000278 | m2 | Slc27a2       |
| m2-Snph         | mmu-miR- | 4  | 0.009936 | m2 | Snph          |
| m2-Spryd3       | mmu-miR- | 17 | 0.002118 | m2 | Spryd3        |
| m2-Ss18l1       | mmu-miR- | 9  | 0.009439 | m2 | Ss18l1        |
| m2-Stard8       | mmu-miR- | 9  | 0.009439 | m2 | Stard8        |
| m2-Stxbp1       | mmu-miR- | 11 | 0.004085 | m2 | Stxbp1        |
| m2-Stxbp1       | mmu-miR- | 12 | 0.000278 | m2 | Stxbp1        |
| m2-Suz12        | mmu-miR- | 2  | 0.007046 | m2 | Suz12         |
| m2-Suz12        | Gm16160  | 2  | 0.009719 | m2 | Suz12         |
| m2-Suz12        | mmu-miR- | 2  | 0.004767 | m2 | Suz12         |
| m2-Suz12        | 9530036O | 2  | 0.009719 | m2 | Suz12         |
| m2-Suz12        | Fam150a  | 2  | 0.002903 | m2 | Suz12         |
| m2-Suz12        | mmu-miR- | 11 | 0.003485 | m2 | Suz12         |
| m2-Suz12        | mmu-miR- | 4  | 0.009936 | m2 | Suz12         |
| m2-Suz12        | mmu-miR- | 9  | 0.007418 | m2 | Suz12         |
| m2-Suz12        | mmu-miR- | 17 | 0.002118 | m2 | Suz12         |
| m2-Suz12        | mmu-miR- | 11 | 0.004085 | m2 | Suz12         |
| m2-Suz12        | mmu-miR- | 12 | 0.000278 | m2 | Suz12         |
| m2-Suz12        | Gm16701  | 2  | 0.009719 | m2 | Suz12         |
| m2-Suz12        | 9330111N | 2  | 0.009719 | m2 | Suz12         |
| m2-Syt11        | mmu-miR- | 17 | 0.002118 | m2 | Syt11         |
| m2-Tgs1         | mmu-miR- | 12 | 0.000278 | m2 | Tgs1          |
| m2-Tmem8b       | mmu-miR- | 12 | 0.000278 | m2 | Tmem8b        |
| m2-Tmem8b       | mmu-miR- | 17 | 0.002118 | m2 | Tmem8b        |
| m2-Tollip       | mmu-miR- | 15 | 2.18E-05 | m2 | Tollip        |
| m2-Ttc30b       | mmu-miR- | 15 | 2.18E-05 | m2 | Ttc30b        |
| m2-Unk          | mmu-miR- | 19 | 0.009865 | m2 | Unk           |
| m2-Vamp3        | mmu-miR- | 11 | 0.003485 | m2 | Vamp3         |
| m2-Vamp3        | mmu-miR- | 11 | 0.007613 | m2 | Vamp3         |
| m2-Vamp3        | mmu-miR- | 15 | 0.000748 | m2 | Vamp3         |
| m2-Zbtb18       | mmu-miR- | 17 | 0.002118 | m2 | Zbtb18        |
| m2-Zbtb18       | mmu-miR- | 10 | 0.008388 | m2 | Zbtb18        |
| m2-Zbtb18       | mmu-miR- | 11 | 0.003485 | m2 | Zbtb18        |
| m2-Zc3h11a      | mmu-miR- | 15 | 2.18E-05 | m2 | Zc3h11a       |
| m2-Zc3h11d      | mmu-miR- | 19 | 0.009865 | m2 | Zc3h11d       |
| m2-Zfp866       | mmu-miR- | 15 | 0.000748 | m2 | Zfp866        |
| m3-261002M06Rik | mmu-miR- | 2  | 0.009194 | m3 | 2610002M06Rik |
| m3-Abr          | mmu-miR- | 12 | 0.002211 | m3 | Abr           |

|                     |    |          |    |         |
|---------------------|----|----------|----|---------|
| m3-Adam2 mmu-miR-   | 12 | 0.002211 | m3 | Adam23  |
| m3-Bsdcl mmu-miR-   | 13 | 0.007318 | m3 | Bsdcl   |
| m3-Cercar mmu-miR-  | 3  | 0.000333 | m3 | Cercam  |
| m3-Cercar mmu-miR-  | 2  | 0.004506 | m3 | Cercam  |
| m3-Chrnb4 mmu-miR-  | 2  | 0.004506 | m3 | Chrnbl  |
| m3-Chrnb4 mmu-miR-  | 3  | 0.000333 | m3 | Chrnbl  |
| m3-Dtna mmu-miR-    | 12 | 0.002211 | m3 | Dtna    |
| m3-Fbxo28 mmu-miR-  | 12 | 0.002211 | m3 | Fbxo28  |
| m3-Fbxo28 mmu-miR-  | 13 | 0.007318 | m3 | Fbxo28  |
| m3-Gm7616 mmu-miR-  | 2  | 0.009194 | m3 | Gm7616  |
| m3-Gnl3l mmu-miR-   | 12 | 0.002211 | m3 | Gnl3l   |
| m3-Gpm6b mmu-miR-   | 13 | 0.007318 | m3 | Gpm6b   |
| m3-Grik2 mmu-miR-   | 13 | 0.007318 | m3 | Grik2   |
| m3-Kcnmb4 mmu-miR-  | 12 | 0.002211 | m3 | Kcnmb4  |
| m3-Klf2 mmu-miR-    | 13 | 0.007318 | m3 | Klf2    |
| m3-Mtmt12 mmu-miR-  | 12 | 0.002211 | m3 | Mtmt12  |
| m3-Mtus2 mmu-miR-   | 12 | 0.002211 | m3 | Mtus2   |
| m3-Pdia3 mmu-miR-   | 13 | 0.007318 | m3 | Pdia3   |
| m3-Prr5 mmu-miR-    | 3  | 0.000333 | m3 | Prr5    |
| m3-Ptch1 mmu-miR-   | 12 | 0.002211 | m3 | Ptch1   |
| m3-Ptpre mmu-miR-   | 13 | 0.007318 | m3 | Ptpre   |
| m3-Rasd1 mmu-miR-   | 13 | 0.007318 | m3 | Rasd1   |
| m3-Rnf144b mmu-miR- | 13 | 0.007318 | m3 | Rnf144b |
| m3-S1pr1 mmu-miR-   | 13 | 0.007318 | m3 | S1pr1   |
| m3-Snape1 mmu-miR-  | 13 | 0.007318 | m3 | Snape1  |
| m3-Tgfb1 mmu-miR-   | 13 | 0.007318 | m3 | Tgfb1   |
| m3-Tmem178 mmu-miR- | 12 | 0.002211 | m3 | Tmem178 |
| m3-Vat1l mmu-miR-   | 12 | 0.002211 | m3 | Vat1l   |
| m3-Wdr26 mmu-miR-   | 13 | 0.007318 | m3 | Wdr26   |
| m3-Zbtb7a mmu-miR-  | 12 | 0.002211 | m3 | Zbtb7a  |
| m4-Adam19 mmu-miR-  | 28 | 0.005047 | m4 | Adam19  |
| m4-Arf3 mmu-miR-    | 28 | 0.005047 | m4 | Arf3    |
| m4-Cadm2 mmu-miR-   | 28 | 0.005047 | m4 | Cadm2   |
| m4-Casc4 mmu-miR-   | 28 | 0.005047 | m4 | Casc4   |
| m4-Cops2 mmu-miR-   | 28 | 0.005047 | m4 | Cops2   |
| m4-Gata1 mmu-miR-   | 6  | 0.006474 | m4 | Gata1   |
| m4-Gata1 mmu-miR-   | 28 | 0.005047 | m4 | Gata1   |
| m4-Gse1 mmu-miR-    | 8  | 0.002711 | m4 | Gse1    |
| m4-Hn1 mmu-miR-     | 28 | 0.005047 | m4 | Hn1     |
| m4-Hp1bp3 mmu-miR-  | 6  | 0.006474 | m4 | Hp1bp3  |
| m4-Itn1 mmu-miR-    | 4  | 0.004521 | m4 | Itn1    |
| m4-Luc7l3 mmu-miR-  | 28 | 0.005047 | m4 | Luc7l3  |
| m4-Luc7l3 mmu-miR-  | 8  | 0.002711 | m4 | Luc7l3  |
| m4-Mapk14 mmu-miR-  | 28 | 0.005047 | m4 | Mapk14  |
| m4-Nedd4l mmu-miR-  | 8  | 0.002711 | m4 | Nedd4l  |
| m4-Nedd4l mmu-miR-  | 28 | 0.005047 | m4 | Nedd4l  |
| m4-Nipa2 mmu-miR-   | 28 | 0.005047 | m4 | Nipa2   |
| m4-Nudt7 mmu-miR-   | 28 | 0.005047 | m4 | Nudt7   |

|                     |    |          |    |          |
|---------------------|----|----------|----|----------|
| m4-Parp11mmu-miR-   | 8  | 0.002711 | m4 | Parp11   |
| m4-Pigv mmu-miR-    | 4  | 0.004521 | m4 | Pigv     |
| m4-Pik3ip1 mmu-miR- | 6  | 0.006474 | m4 | Pik3ip1  |
| m4-Plagl2 mmu-miR-  | 28 | 0.005047 | m4 | Plagl2   |
| m4-Proser mmu-miR-  | 3  | 0.000862 | m4 | Proser3  |
| m4-Proser mmu-miR-  | 2  | 0.008488 | m4 | Proser3  |
| m4-Rbl1 mmu-miR-    | 28 | 0.005047 | m4 | Rbl1     |
| m4-Rbm26 mmu-miR-   | 28 | 0.005047 | m4 | Rbm26    |
| m4-Rps3 mmu-miR-    | 28 | 0.005047 | m4 | Rps3     |
| m4-Rundc1 mmu-miR-  | 28 | 0.005047 | m4 | Rundc1   |
| m4-Rundc3b mmu-miR- | 28 | 0.005047 | m4 | Rundc3b  |
| m4-Serpin9 mmu-miR- | 28 | 0.005047 | m4 | Serpinb9 |
| m4-Serpin9 mmu-miR- | 8  | 0.002711 | m4 | Serpinb9 |
| m4-Sik1 mmu-miR-    | 6  | 0.006474 | m4 | Sik1     |
| m4-Sik1 mmu-miR-    | 28 | 0.005047 | m4 | Sik1     |
| m4-Slc8a1 mmu-miR-  | 2  | 0.008488 | m4 | Slc8a1   |
| m4-Slc8a1 mmu-miR-  | 3  | 0.000862 | m4 | Slc8a1   |
| m4-Slc8a1 mmu-miR-  | 2  | 0.008488 | m4 | Slc8a1   |
| m4-Smarca5 mmu-miR- | 28 | 0.005047 | m4 | Smarca5  |
| m4-Styx mmu-miR-    | 8  | 0.002711 | m4 | Styx     |
| m4-Styx mmu-miR-    | 28 | 0.005047 | m4 | Styx     |
| m4-Tiam1 mmu-miR-   | 8  | 0.002711 | m4 | Tiam1    |
| m4-Tiam1 mmu-miR-   | 6  | 0.006474 | m4 | Tiam1    |
| m4-Tmod2 mmu-miR-   | 28 | 0.005047 | m4 | Tmod2    |
| m4-Trip12 mmu-miR-  | 2  | 0.008488 | m4 | Trip12   |
| m4-Trip12 mmu-miR-  | 28 | 0.005047 | m4 | Trip12   |
| m4-Trip12 mmu-miR-  | 3  | 0.000862 | m4 | Trip12   |
| m4-Tspan9 mmu-miR-  | 28 | 0.005047 | m4 | Tspan9   |
| m4-Unc93a mmu-miR-  | 4  | 0.004521 | m4 | Unc93a   |
| m4-Usf2 mmu-miR-    | 8  | 0.002711 | m4 | Usf2     |
| m4-Zeb2 mmu-miR-    | 6  | 0.006474 | m4 | Zeb2     |
| m4-Zeb2 mmu-miR-    | 28 | 0.005047 | m4 | Zeb2     |
| m4-Zfp329 mmu-miR-  | 4  | 0.004521 | m4 | Zfp329   |
| m4-Zfp361 mmu-miR-  | 28 | 0.005047 | m4 | Zfp361   |
| m4-Zfp62 mmu-miR-   | 28 | 0.005047 | m4 | Zfp62    |
