# Supplementary material for: [Retracted] Disorder Genes Regulate the Progression of Ischemic Stroke through the NF‐κB Signaling Pathway
Source: Hindawi journal article supplement (doi:10.1155/2021/2464269), 2021-01-01
Supplement: f6 [file 2464269.f6.pdf]

**Table S6.TF\_Target\_Gene**

| Module_Gene | pivot  | moduleLin | Pvalue   | module | Target_gene |
|-------------|--------|-----------|----------|--------|-------------|
| m1-Adora1   | Nfkb1  | 32        | 0.002551 | m1     | Adora1      |
| m1-Alox5    | Nfkb1  | 32        | 0.002551 | m1     | Alox5       |
| m1-Amh      | Nfkb1  | 32        | 0.002551 | m1     | Amh         |
| m1-Ccl20    | Nfkb1  | 32        | 0.002551 | m1     | Ccl20       |
| m1-Ccl22    | Nfkb1  | 32        | 0.002551 | m1     | Ccl22       |
| m1-Cd80     | Nfkb1  | 32        | 0.002551 | m1     | Cd80        |
| m1-Cdh1     | Nfkb1  | 32        | 0.002551 | m1     | Cdh1        |
| m1-Cdkn1a   | Nfkb1  | 32        | 0.002551 | m1     | Cdkn1a      |
| m1-Cxcl10   | Nfkb1  | 32        | 0.002551 | m1     | Cxcl10      |
| m1-Ebna1bp2 | Nfkb1  | 32        | 0.002551 | m1     | Ebna1bp2    |
| m1-Gclm     | Nfkb1  | 32        | 0.002551 | m1     | Gclm        |
| m1-Ifng     | Nfkb1  | 32        | 0.002551 | m1     | Ifng        |
| m1-Igf2bp2  | Nfkb1  | 32        | 0.002551 | m1     | Igf2bp2     |
| m1-Il10     | Nfkb1  | 32        | 0.002551 | m1     | Il10        |
| m1-Il12b    | Nfkb1  | 32        | 0.002551 | m1     | Il12b       |
| m1-Itgam    | Nfkb1  | 32        | 0.002551 | m1     | Itgam       |
| m1-Kcnd2    | Nfkb1  | 32        | 0.002551 | m1     | Kcnd2       |
| m1-Ltc4s    | Nfkb1  | 32        | 0.002551 | m1     | Ltc4s       |
| m1-Mmp14    | Nfkb1  | 32        | 0.002551 | m1     | Mmp14       |
| m1-Myc      | Nfkb1  | 32        | 0.002551 | m1     | Myc         |
| m1-Nfkb1    | Nfkb1  | 32        | 0.002551 | m1     | Nfkb1       |
| m1-Nqo1     | Nfkb1  | 32        | 0.002551 | m1     | Nqo1        |
| m1-Nudt1    | Nfkb1  | 32        | 0.002551 | m1     | Nudt1       |
| m1-Ppargc1a | Nfkb1  | 32        | 0.002551 | m1     | Ppargc1a    |
| m1-Ppp1r14a | Nfkb1  | 32        | 0.002551 | m1     | Ppp1r14a    |
| m1-Ptges    | Nfkb1  | 32        | 0.002551 | m1     | Ptges       |
| m1-Ptgs2    | Nfkb1  | 32        | 0.002551 | m1     | Ptgs2       |
| m1-Ptpn4    | Nfkb1  | 32        | 0.002551 | m1     | Ptpn4       |
| m1-Slc2a1   | Nfkb1  | 32        | 0.002551 | m1     | Slc2a1      |
| m1-Tcrg-C1  | Nfkb1  | 32        | 0.002551 | m1     | Tcrg-C1     |
| m1-Tnfrsf25 | Nfkb1  | 32        | 0.002551 | m1     | Tnfrsf25    |
| m1-Wt1      | Nfkb1  | 32        | 0.002551 | m1     | Wt1         |
| m1-Nfkb1    | Nfkb1a | 2         | 0.009436 | m1     | Nfkb1       |
| m1-Ptgs2    | Nfkb1a | 2         | 0.009436 | m1     | Ptgs2       |
| m1-Myc      | Cnot3  | 2         | 0.009436 | m1     | Myc         |
| m1-Zfx      | Cnot3  | 2         | 0.009436 | m1     | Zfx         |
| m1-Ccne1    | Ctnnb1 | 13        | 0.005511 | m1     | Ccne1       |
| m1-Cdh1     | Ctnnb1 | 13        | 0.005511 | m1     | Cdh1        |
| m1-Cyp2b10  | Ctnnb1 | 13        | 0.005511 | m1     | Cyp2b10     |
| m1-E2f1     | Ctnnb1 | 13        | 0.005511 | m1     | E2f1        |
| m1-Foxa2    | Ctnnb1 | 13        | 0.005511 | m1     | Foxa2       |
| m1-Gast     | Ctnnb1 | 13        | 0.005511 | m1     | Gast        |
| m1-Grem2    | Ctnnb1 | 13        | 0.005511 | m1     | Grem2       |
| m1-Lhb      | Ctnnb1 | 13        | 0.005511 | m1     | Lhb         |
| m1-Myc      | Ctnnb1 | 13        | 0.005511 | m1     | Myc         |
| m1-Pdgfra   | Ctnnb1 | 13        | 0.005511 | m1     | Pdgfra      |

|            |        |    |          |    |         |
|------------|--------|----|----------|----|---------|
| m1-Ptgs2   | Cttnb1 | 13 | 0.005511 | m1 | Ptgs2   |
| m1-Rapsn   | Cttnb1 | 13 | 0.005511 | m1 | Rapsn   |
| m1-Slc2a1  | Cttnb1 | 13 | 0.005511 | m1 | Slc2a1  |
| m3-Axin2   | Cttnb1 | 5  | 0.003413 | m3 | Axin2   |
| m3-Bcl2l1  | Cttnb1 | 5  | 0.003413 | m3 | Bcl2l1  |
| m3-lhh     | Cttnb1 | 5  | 0.003413 | m3 | lhh     |
| m3-Neurog1 | Cttnb1 | 5  | 0.003413 | m3 | Neurog1 |
| m3-Twist1  | Cttnb1 | 5  | 0.003413 | m3 | Twist1  |
| m3-Helt    | Foxa2  | 4  | 0.004109 | m3 | Helt    |
| m3-Lcn5    | Foxa2  | 4  | 0.004109 | m3 | Lcn5    |
| m3-Otx1    | Foxa2  | 4  | 0.004109 | m3 | Otx1    |
| m3-Tle4    | Foxa2  | 4  | 0.004109 | m3 | Tle4    |
| m3-Bmp2    | Gli2   | 3  | 0.001421 | m3 | Bmp2    |
| m3-Hes1    | Gli2   | 3  | 0.001421 | m3 | Hes1    |
| m3-Ptch1   | Gli2   | 3  | 0.001421 | m3 | Ptch1   |
| m4-Acmsd   | Hnf4a  | 4  | 0.008596 | m4 | Acmsd   |
| m4-Apoa4   | Hnf4a  | 4  | 0.008596 | m4 | Apoa4   |
| m4-F12     | Hnf4a  | 4  | 0.008596 | m4 | F12     |
| m4-Lipc    | Hnf4a  | 4  | 0.008596 | m4 | Lipc    |
| m2-Ifna4   | Irf7   | 2  | 0.005276 | m2 | Ifna4   |
| m2-Ifnl3   | Irf7   | 2  | 0.005276 | m2 | Ifnl3   |
| m3-Aqp5    | Jun    | 8  | 0.001263 | m3 | Aqp5    |
| m3-Bmp2    | Jun    | 8  | 0.001263 | m3 | Bmp2    |
| m3-Ccl5    | Jun    | 8  | 0.001263 | m3 | Ccl5    |
| m3-Dmtf1   | Jun    | 8  | 0.001263 | m3 | Dmtf1   |
| m3-Jdp2    | Jun    | 8  | 0.001263 | m3 | Jdp2    |
| m3-Myod1   | Jun    | 8  | 0.001263 | m3 | Myod1   |
| m3-Tff2    | Jun    | 8  | 0.001263 | m3 | Tff2    |
| m3-Twist1  | Jun    | 8  | 0.001263 | m3 | Twist1  |
| m4-Eln     | Mybl2  | 4  | 0.000155 | m4 | Eln     |
| m4-Erbp2   | Mybl2  | 4  | 0.000155 | m4 | Erbp2   |
| m4-Mip     | Mybl2  | 4  | 0.000155 | m4 | Mip     |
| m4-Sftpa1  | Mybl2  | 4  | 0.000155 | m4 | Sftpa1  |
| m1-Abcc3   | Nfe2l2 | 12 | 0.003929 | m1 | Abcc3   |
| m1-Bglap3  | Nfe2l2 | 12 | 0.003929 | m1 | Bglap3  |
| m1-Cd36    | Nfe2l2 | 12 | 0.003929 | m1 | Cd36    |
| m1-Il10    | Nfe2l2 | 12 | 0.003929 | m1 | Il10    |
| m1-Il1rn   | Nfe2l2 | 12 | 0.003929 | m1 | Il1rn   |
| m1-Mgst1   | Nfe2l2 | 12 | 0.003929 | m1 | Mgst1   |
| m1-Nfkb1   | Nfe2l2 | 12 | 0.003929 | m1 | Nfkb1   |
| m1-Nqo1    | Nfe2l2 | 12 | 0.003929 | m1 | Nqo1    |
| m1-Prdx1   | Nfe2l2 | 12 | 0.003929 | m1 | Prdx1   |
| m1-Scarb1  | Nfe2l2 | 12 | 0.003929 | m1 | Scarb1  |
| m1-Slc40a1 | Nfe2l2 | 12 | 0.003929 | m1 | Slc40a1 |
| m1-Tnfsf11 | Nfe2l2 | 12 | 0.003929 | m1 | Tnfsf11 |
| m1-Cd36    | Nr1i2  | 6  | 0.000449 | m1 | Cd36    |
| m1-Cdkn1a  | Nr1i2  | 6  | 0.000449 | m1 | Cdkn1a  |
| m1-Cyp24a1 | Nr1i2  | 6  | 0.000449 | m1 | Cyp24a1 |

|              |       |    |          |    |           |
|--------------|-------|----|----------|----|-----------|
| m1-Cyp2b10   | Nr1i2 | 6  | 0.000449 | m1 | Cyp2b10   |
| m1-Cyp3a11   | Nr1i2 | 6  | 0.000449 | m1 | Cyp3a11   |
| m1-E2f1      | Nr1i2 | 6  | 0.000449 | m1 | E2f1      |
| m3-Sgk1      | Nr3c2 | 2  | 0.005495 | m3 | Sgk1      |
| m3-Tsc22d3   | Nr3c2 | 2  | 0.005495 | m3 | Tsc22d3   |
| m1-Acta2     | Smad2 | 6  | 0.007318 | m1 | Acta2     |
| m1-Cdkn1a    | Smad2 | 6  | 0.007318 | m1 | Cdkn1a    |
| m1-Dapk1     | Smad2 | 6  | 0.007318 | m1 | Dapk1     |
| m1-Fbln5     | Smad2 | 6  | 0.007318 | m1 | Fbln5     |
| m1-H19       | Smad2 | 6  | 0.007318 | m1 | H19       |
| m1-Skil      | Smad2 | 6  | 0.007318 | m1 | Skil      |
| m1-Abcb1a    | Sp1   | 45 | 0.000122 | m1 | Abcb1a    |
| m1-Acta2     | Sp1   | 45 | 0.000122 | m1 | Acta2     |
| m1-Adcy4     | Sp1   | 45 | 0.000122 | m1 | Adcy4     |
| m1-Adcyap1r1 | Sp1   | 45 | 0.000122 | m1 | Adcyap1r1 |
| m1-Alox5     | Sp1   | 45 | 0.000122 | m1 | Alox5     |
| m1-Arntl     | Sp1   | 45 | 0.000122 | m1 | Arntl     |
| m1-Cadm1     | Sp1   | 45 | 0.000122 | m1 | Cadm1     |
| m1-Ccna1     | Sp1   | 45 | 0.000122 | m1 | Ccna1     |
| m1-Cdkn1a    | Sp1   | 45 | 0.000122 | m1 | Cdkn1a    |
| m1-Cdkn1c    | Sp1   | 45 | 0.000122 | m1 | Cdkn1c    |
| m1-Cend1     | Sp1   | 45 | 0.000122 | m1 | Cend1     |
| m1-Col5a1    | Sp1   | 45 | 0.000122 | m1 | Col5a1    |
| m1-Fmr1      | Sp1   | 45 | 0.000122 | m1 | Fmr1      |
| m1-Gabra6    | Sp1   | 45 | 0.000122 | m1 | Gabra6    |
| m1-Gfpt2     | Sp1   | 45 | 0.000122 | m1 | Gfpt2     |
| m1-Gpc4      | Sp1   | 45 | 0.000122 | m1 | Gpc4      |
| m1-Gstk1     | Sp1   | 45 | 0.000122 | m1 | Gstk1     |
| m1-Hinfp     | Sp1   | 45 | 0.000122 | m1 | Hinfp     |
| m1-Htr1a     | Sp1   | 45 | 0.000122 | m1 | Htr1a     |
| m1-lfitm5    | Sp1   | 45 | 0.000122 | m1 | lfitm5    |
| m1-Igfbp3    | Sp1   | 45 | 0.000122 | m1 | Igfbp3    |
| m1-Il10      | Sp1   | 45 | 0.000122 | m1 | Il10      |
| m1-Itga6     | Sp1   | 45 | 0.000122 | m1 | Itga6     |
| m1-Jak3      | Sp1   | 45 | 0.000122 | m1 | Jak3      |
| m1-Lhx4      | Sp1   | 45 | 0.000122 | m1 | Lhx4      |
| m1-Mgst1     | Sp1   | 45 | 0.000122 | m1 | Mgst1     |
| m1-Myc       | Sp1   | 45 | 0.000122 | m1 | Myc       |
| m1-Nat2      | Sp1   | 45 | 0.000122 | m1 | Nat2      |
| m1-Nf1       | Sp1   | 45 | 0.000122 | m1 | Nf1       |
| m1-Nr1h2     | Sp1   | 45 | 0.000122 | m1 | Nr1h2     |
| m1-Nr5a1     | Sp1   | 45 | 0.000122 | m1 | Nr5a1     |
| m1-Oprd1     | Sp1   | 45 | 0.000122 | m1 | Oprd1     |
| m1-Prdx6     | Sp1   | 45 | 0.000122 | m1 | Prdx6     |
| m1-Prkar2b   | Sp1   | 45 | 0.000122 | m1 | Prkar2b   |
| m1-Ptges2    | Sp1   | 45 | 0.000122 | m1 | Ptges2    |
| m1-Ptgs2     | Sp1   | 45 | 0.000122 | m1 | Ptgs2     |
| m1-Rnls      | Sp1   | 45 | 0.000122 | m1 | Rnls      |

|            |      |    |          |    |         |
|------------|------|----|----------|----|---------|
| m1-Scarb1  | Sp1  | 45 | 0.000122 | m1 | Scarb1  |
| m1-Skil    | Sp1  | 45 | 0.000122 | m1 | Skil    |
| m1-Slc2a1  | Sp1  | 45 | 0.000122 | m1 | Slc2a1  |
| m1-Slc7a5  | Sp1  | 45 | 0.000122 | m1 | Slc7a5  |
| m1-Smad7   | Sp1  | 45 | 0.000122 | m1 | Smad7   |
| m1-Sparc   | Sp1  | 45 | 0.000122 | m1 | Sparc   |
| m1-Sult1a1 | Sp1  | 45 | 0.000122 | m1 | Sult1a1 |
| m1-Tnfsf11 | Sp1  | 45 | 0.000122 | m1 | Tnfsf11 |
| m2-Acaca   | Sp1  | 15 | 1.40E-05 | m2 | Acaca   |
| m2-Acsl4   | Sp1  | 15 | 1.40E-05 | m2 | Acsl4   |
| m2-Bace1   | Sp1  | 15 | 1.40E-05 | m2 | Bace1   |
| m2-Bmp4    | Sp1  | 15 | 1.40E-05 | m2 | Bmp4    |
| m2-Cebpa   | Sp1  | 15 | 1.40E-05 | m2 | Cebpa   |
| m2-Col2a1  | Sp1  | 15 | 1.40E-05 | m2 | Col2a1  |
| m2-Csf2    | Sp1  | 15 | 1.40E-05 | m2 | Csf2    |
| m2-Csrp2   | Sp1  | 15 | 1.40E-05 | m2 | Csrp2   |
| m2-Fabp6   | Sp1  | 15 | 1.40E-05 | m2 | Fabp6   |
| m2-Hmgcl   | Sp1  | 15 | 1.40E-05 | m2 | Hmgcl   |
| m2-Jund    | Sp1  | 15 | 1.40E-05 | m2 | Jund    |
| m2-Myh11   | Sp1  | 15 | 1.40E-05 | m2 | Myh11   |
| m2-Rac2    | Sp1  | 15 | 1.40E-05 | m2 | Rac2    |
| m2-Sh3gl1  | Sp1  | 15 | 1.40E-05 | m2 | Sh3gl1  |
| m2-Ucp2    | Sp1  | 15 | 1.40E-05 | m2 | Ucp2    |
| m2-Col2a1  | Sp2  | 2  | 0.008857 | m2 | Col2a1  |
| m2-Ucp2    | Sp2  | 2  | 0.008857 | m2 | Ucp2    |
| m3-Hes1    | Tle2 | 2  | 0.001621 | m3 | Hes1    |
| m3-Nkx6-1  | Tle2 | 2  | 0.001621 | m3 | Nkx6-1  |
